# Supplementary material for: A general pharmacodynamic interaction model identifies perpetrators and victims in drug interactions
Source: PubMed Central journal article supplement (PMC5730559; doi:10.1038/s41467-017-01929-y), 2017-12-14

Tun.Tun (= Ax.Bx) exp. additivity (LA)  
Int\_AB = 0 and Int\_BA = 0 at EC50

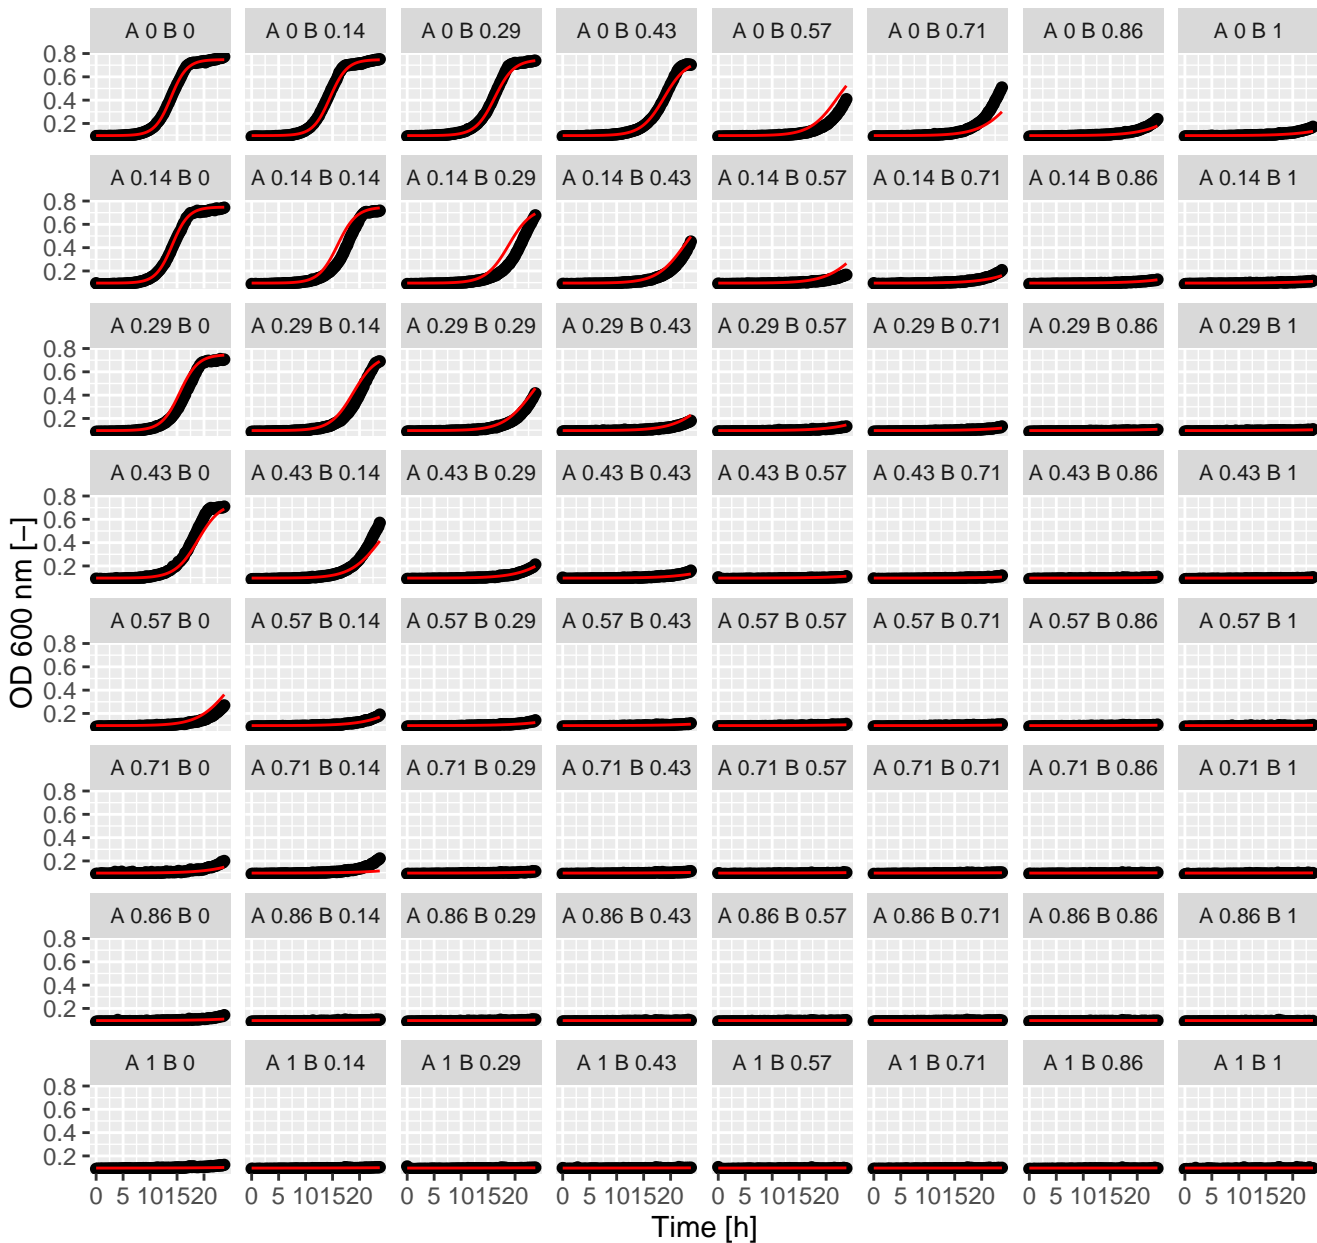

Tun.Tun (= Ax.Bx) full GPDI  
 Int\_AB = 0.79 and Int\_BA = -0.29 at EC50

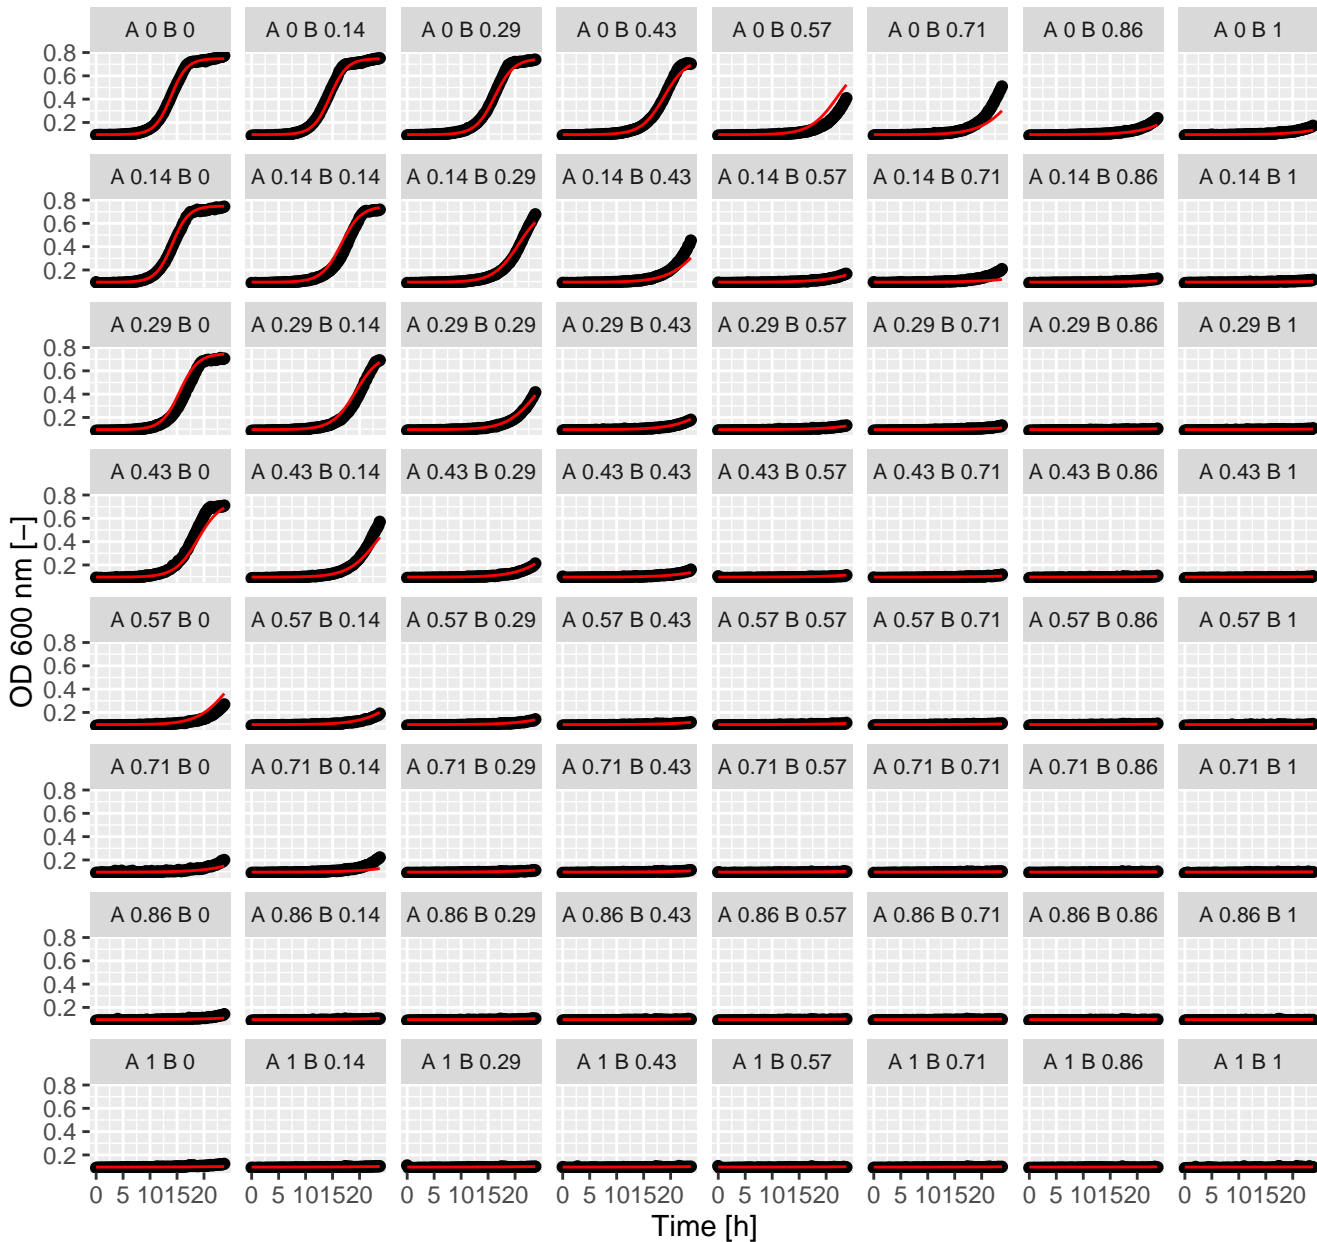

5FU.5FU (= Ax.Bx) exp. additivity (LA)  
Int\_AB = 0 and Int\_BA = 0 at EC50

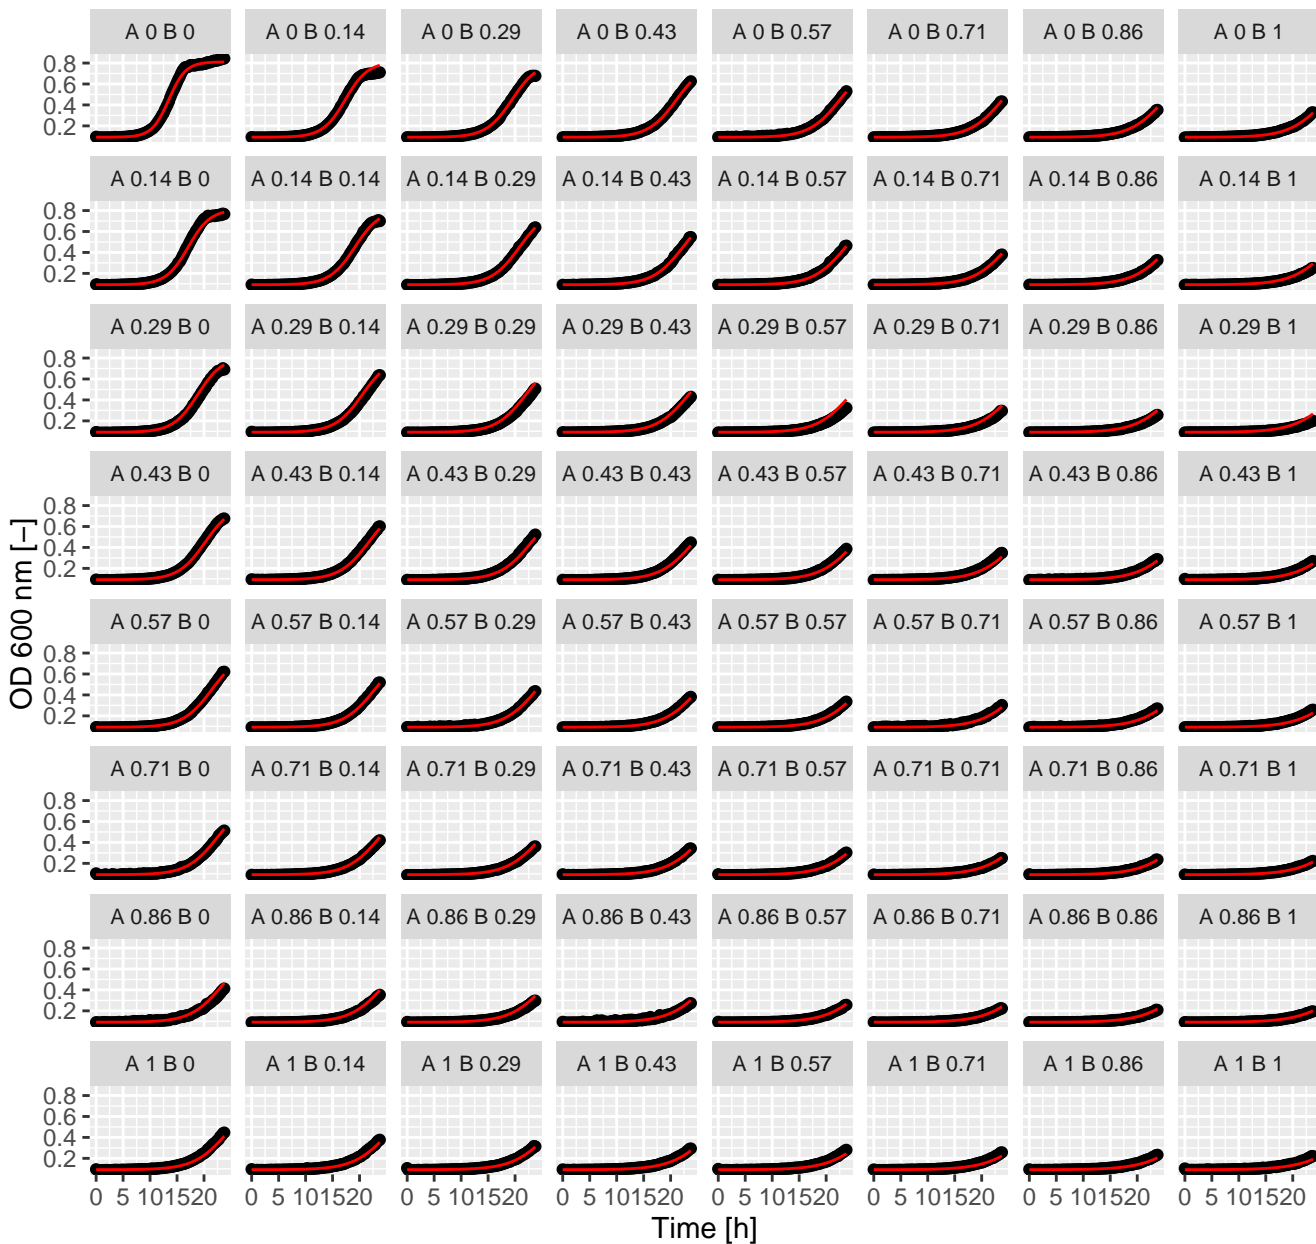

5FU.5FU (= Ax.Bx) full GPDI  
Int\_AB = 0 and Int\_BA = 0.04 at EC50

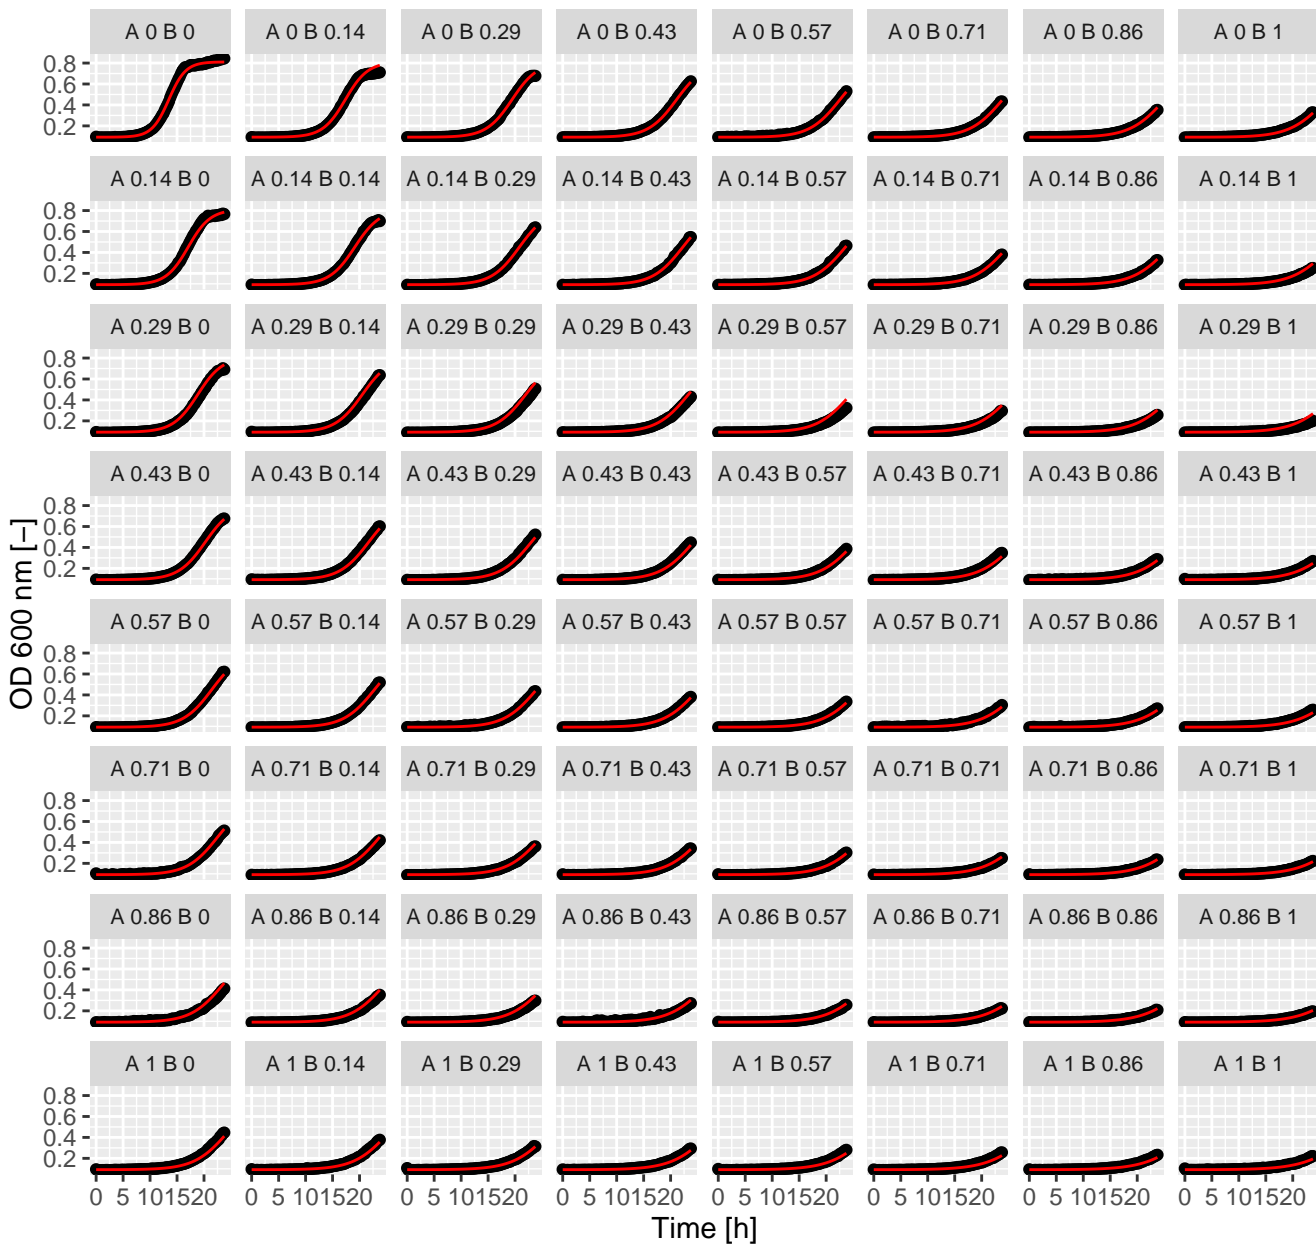

5FU.Ben (= Ax.Bx) exp. additivity (LA)  
Int\_AB = 0 and Int\_BA = 0 at EC50

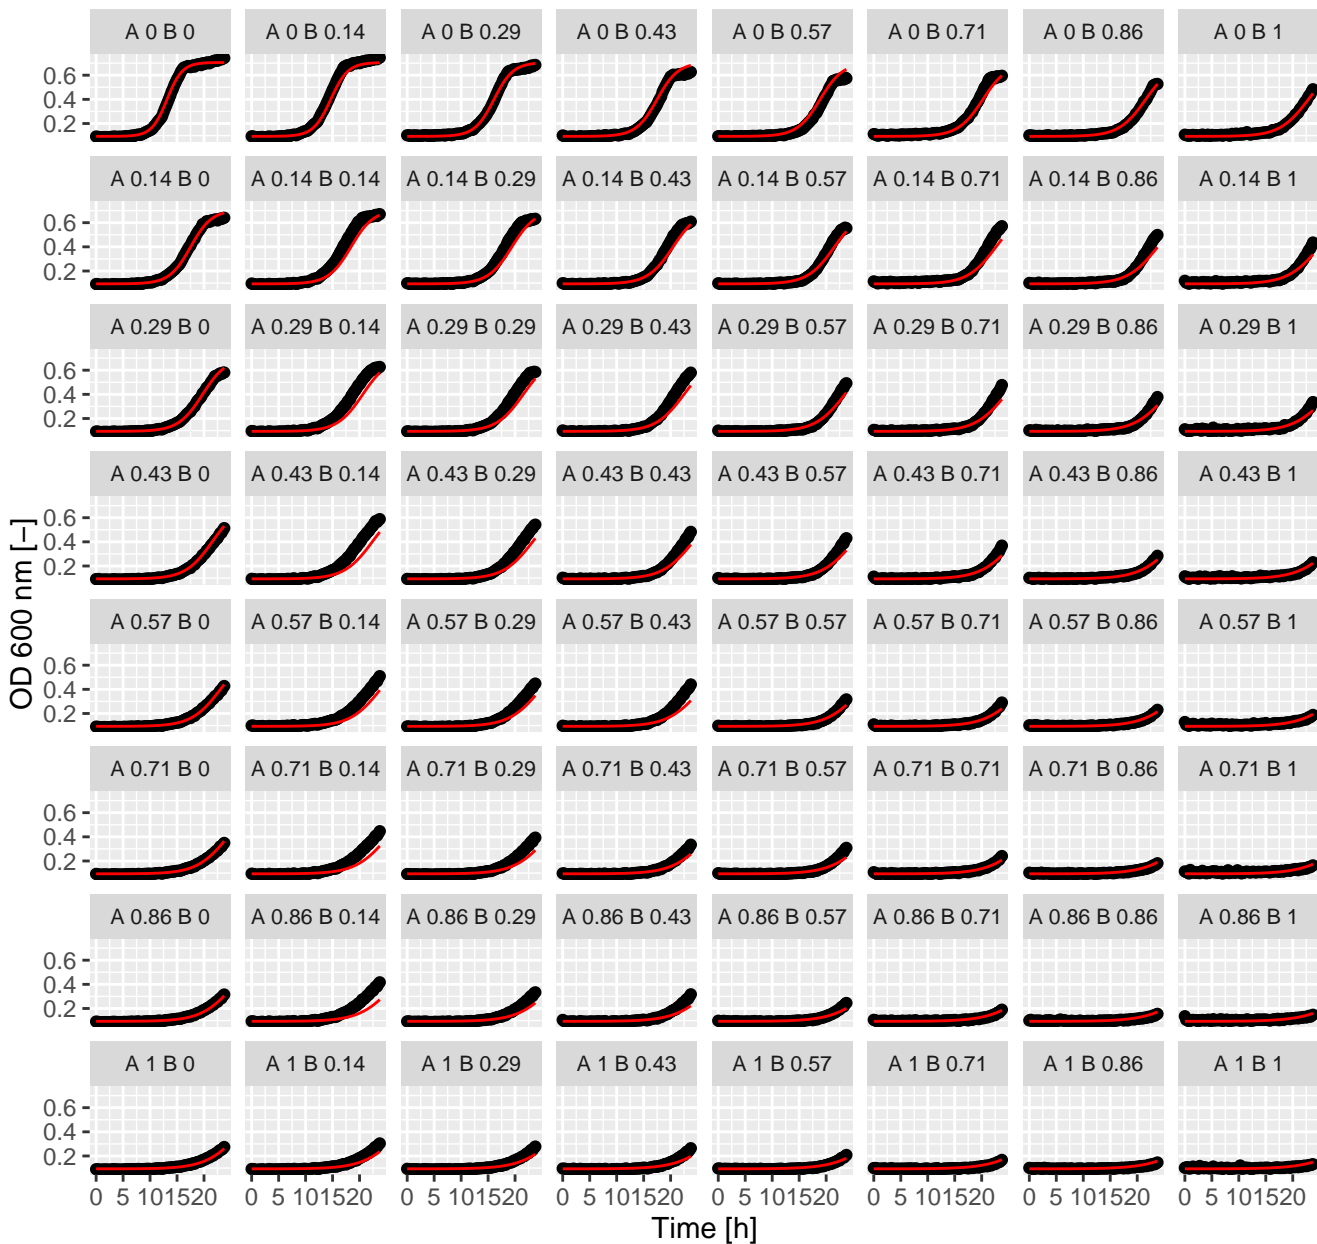

5FU.Ben (= Ax.Bx) full GPDI  
Int\_AB = 1.07 and Int\_BA = -0.33 at EC50

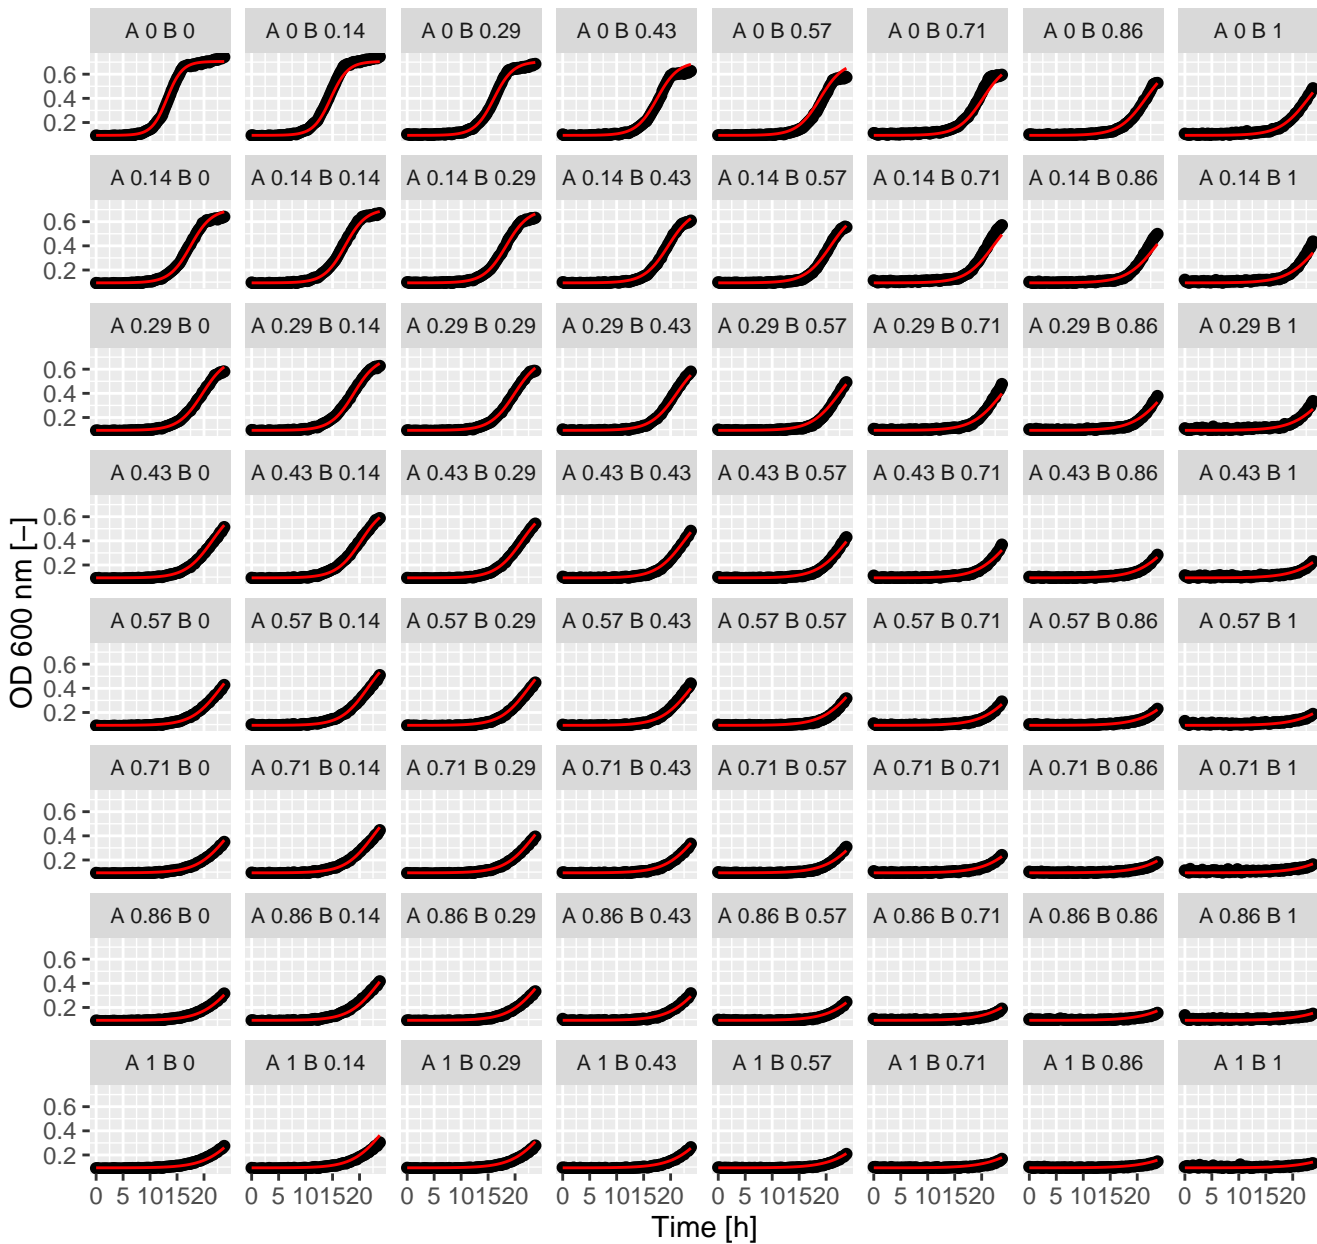

5FU.Lat (= Ax.Bx) exp. additivity (LA)  
Int\_AB = 0 and Int\_BA = 0 at EC50

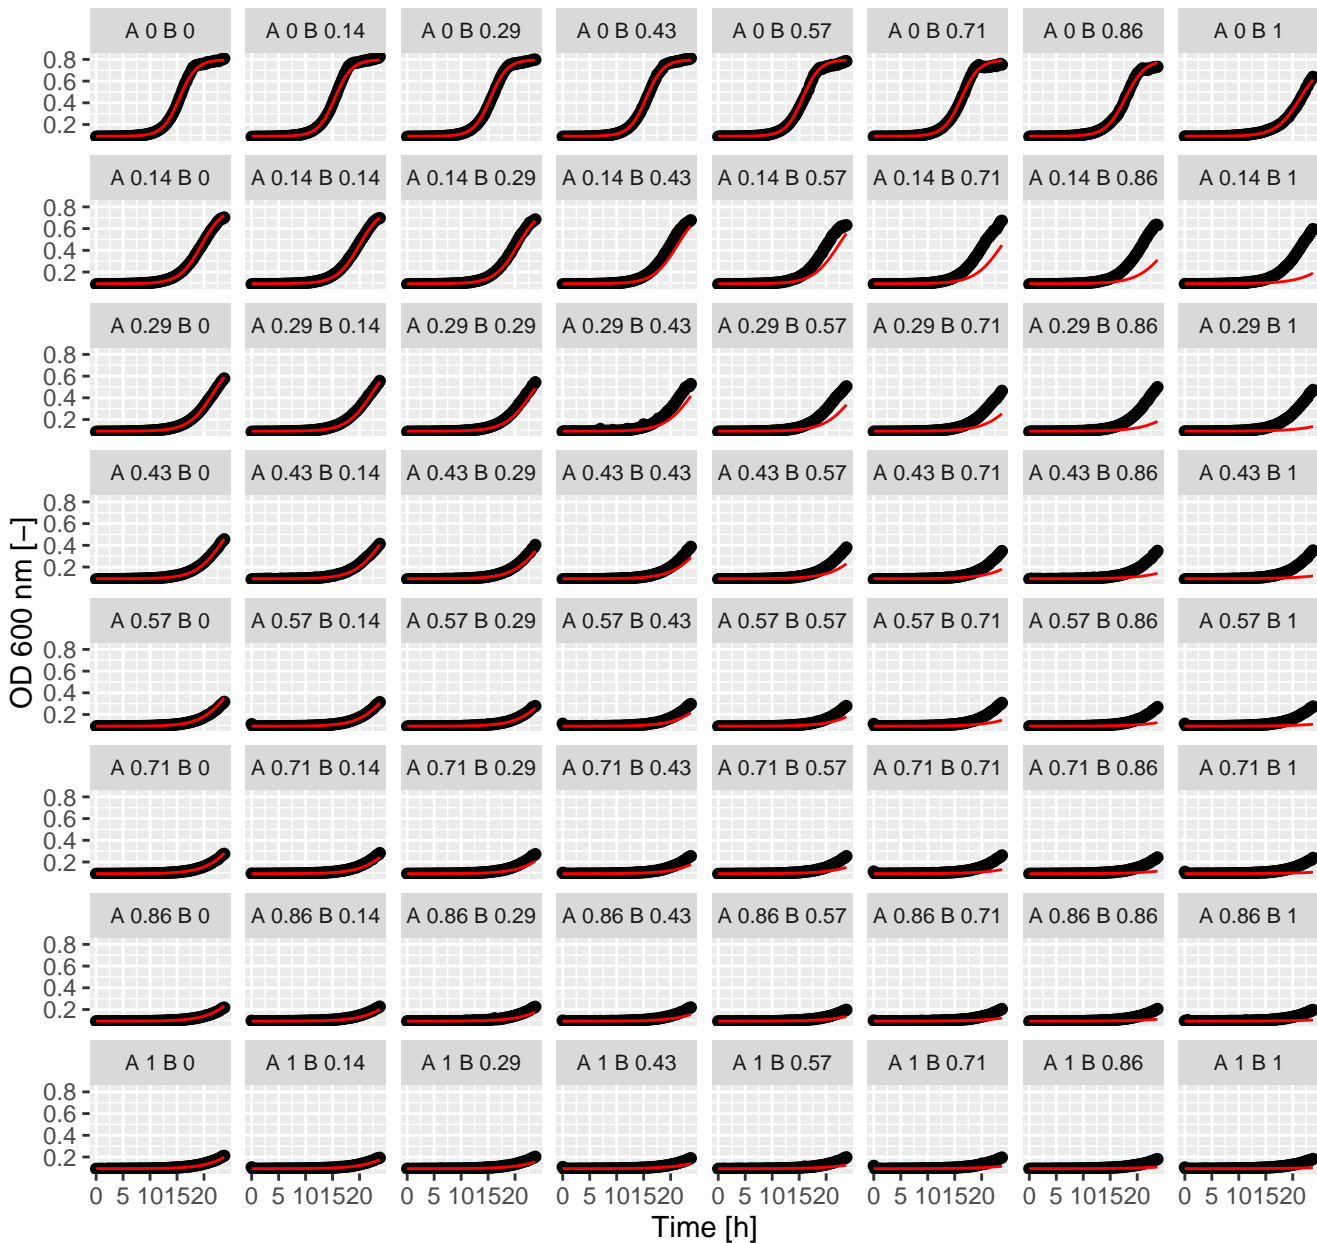

5FU.Lat (= Ax.Bx) full GPDI  
Int\_AB = -0.01 and Int\_BA = 4.66 at EC50

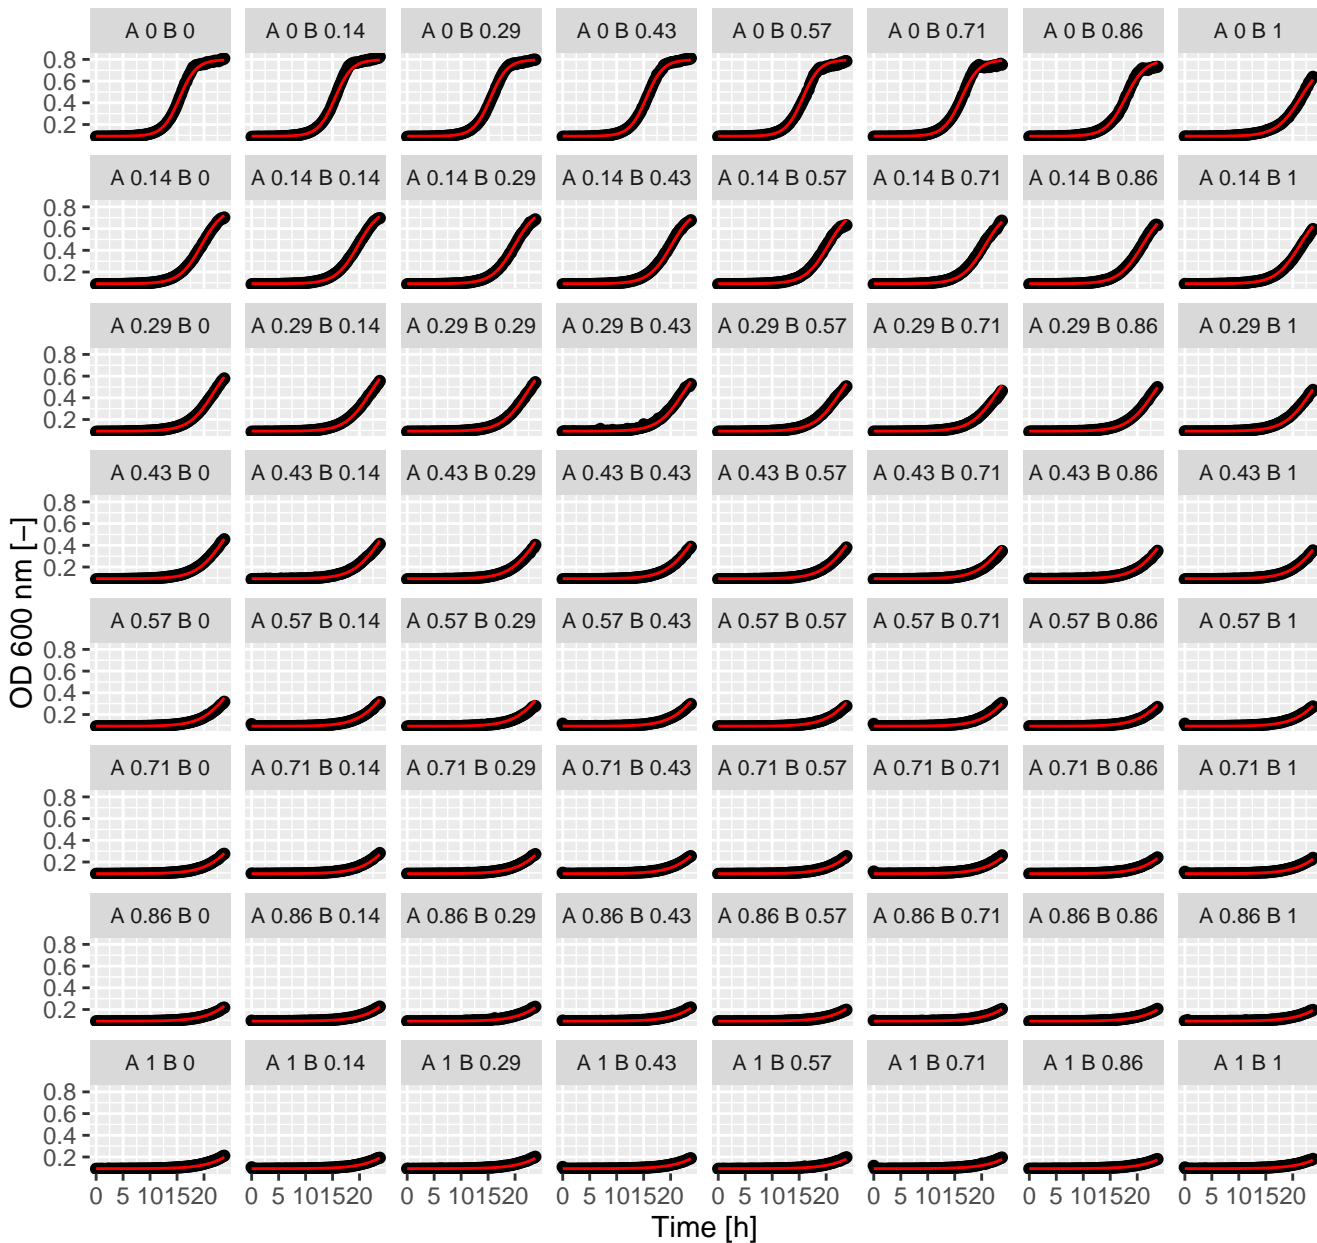



5FU.Pen (= Ax.Bx) exp. additivity (LA)  
Int\_AB = 0 and Int\_BA = 0 at EC50

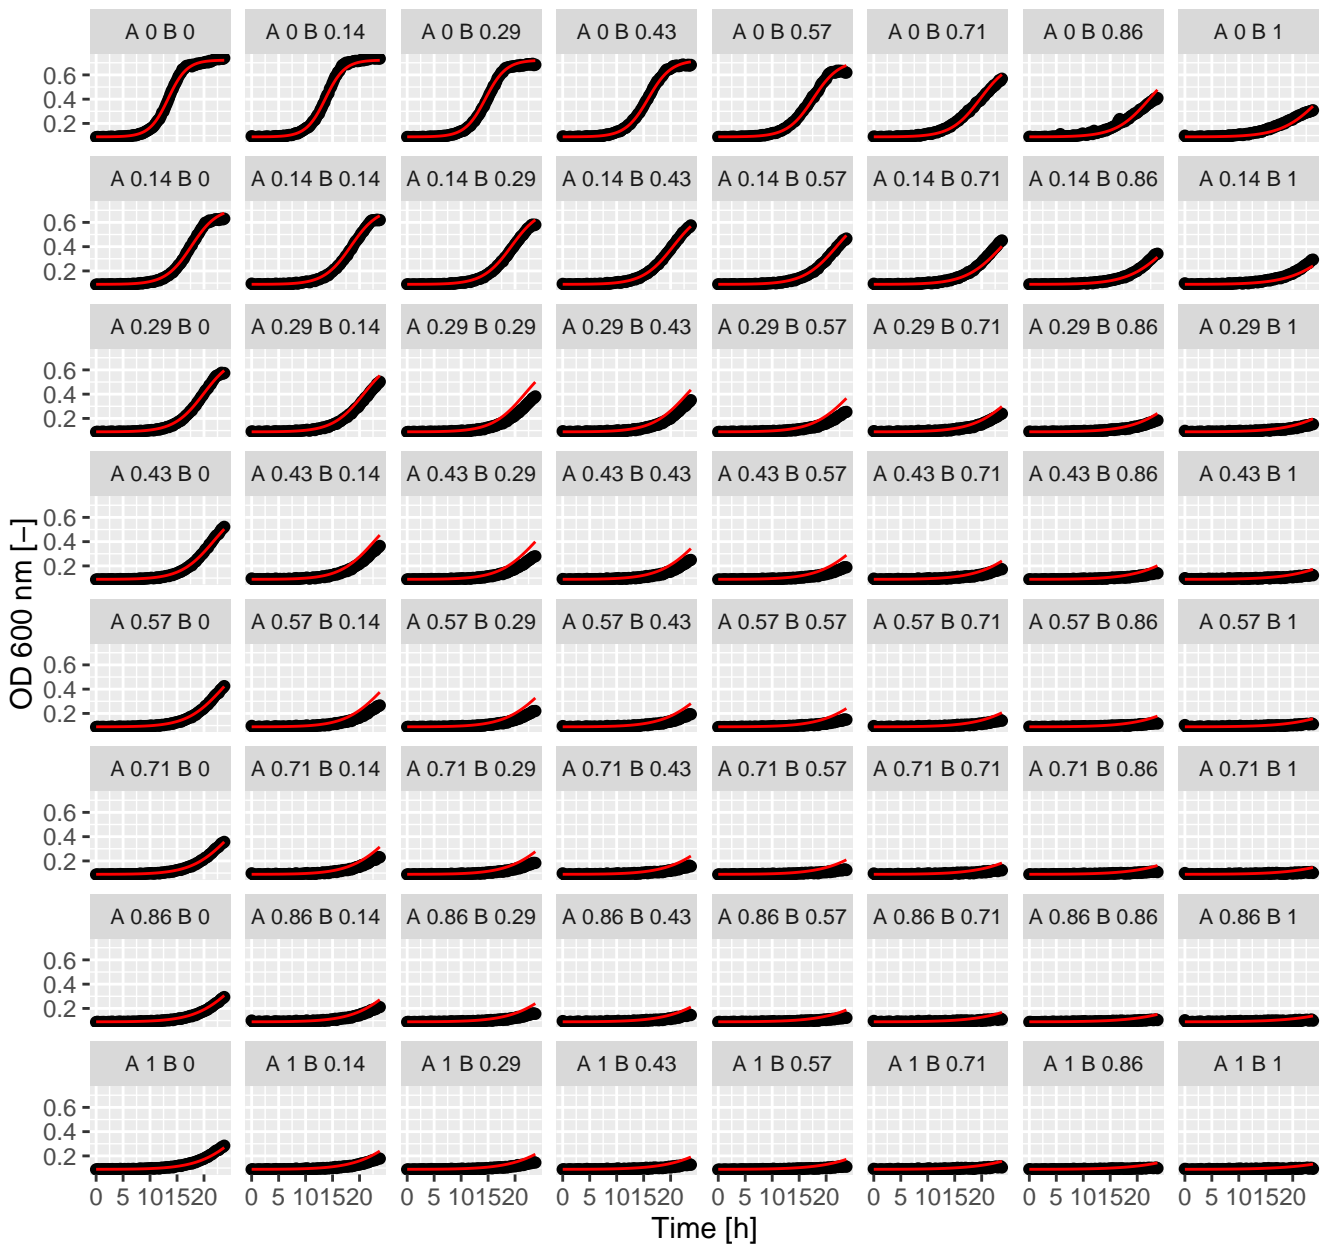

5FU.Pen (= Ax.Bx) full GPDI  
Int\_AB = -0.18 and Int\_BA = -0.31 at EC50

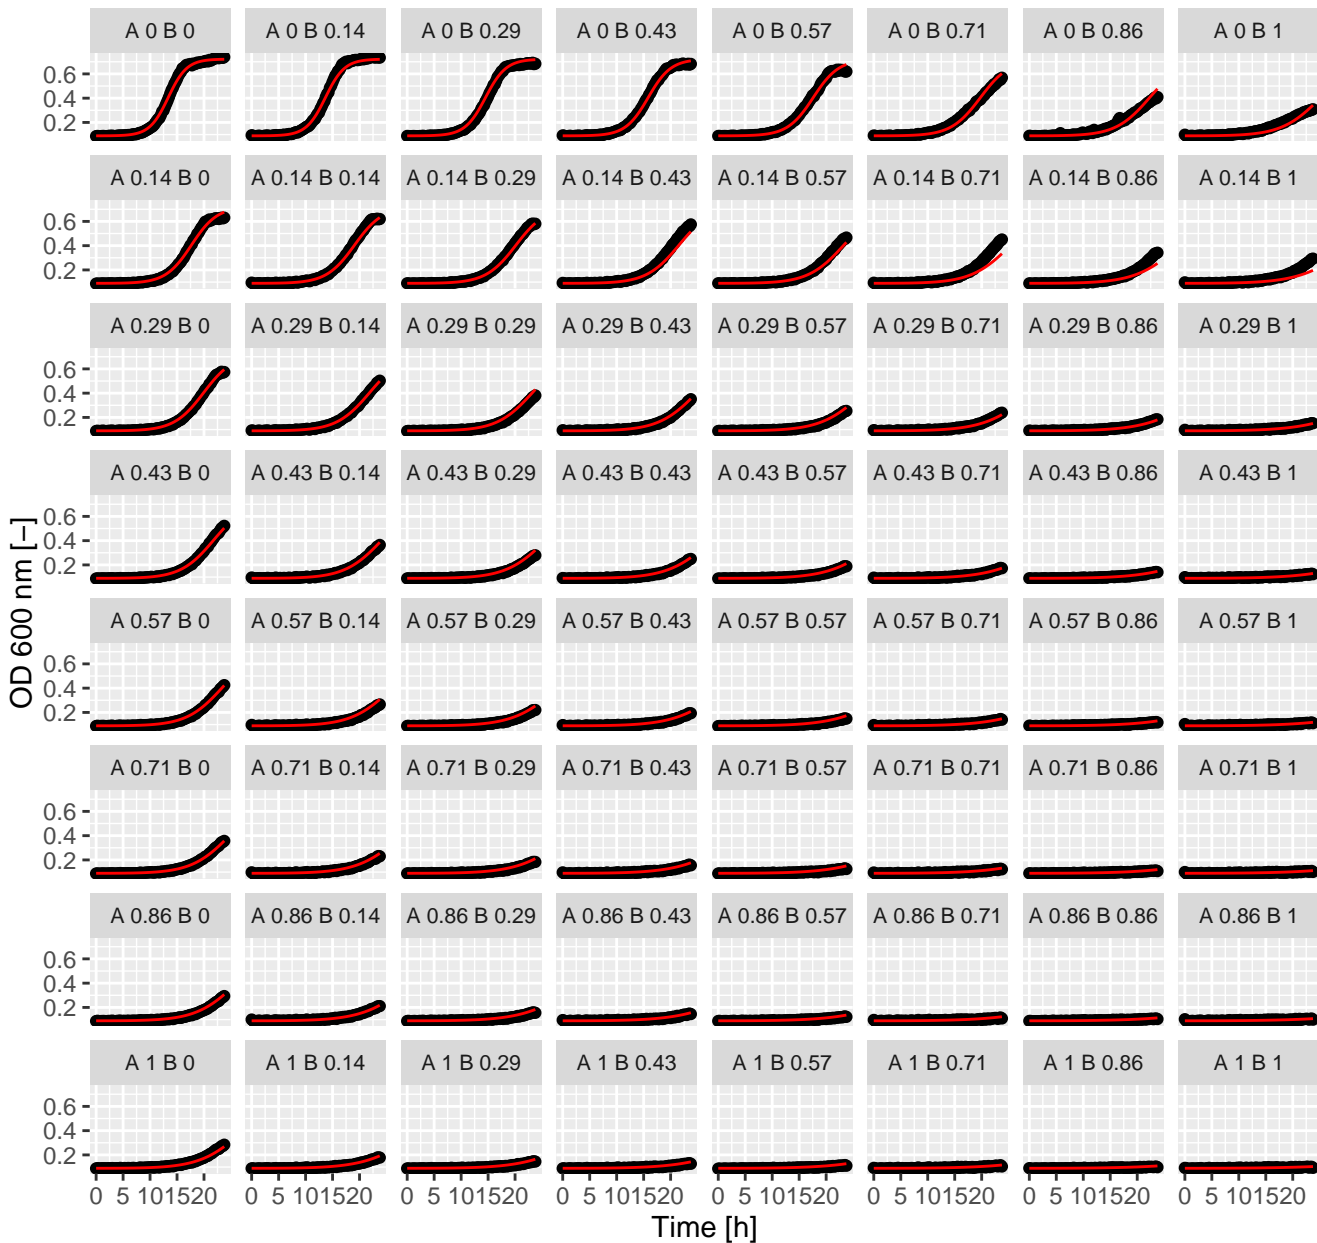

5FU.Sta (= Ax.Bx) exp. additivity (LA)  
Int\_AB = 0 and Int\_BA = 0 at EC50

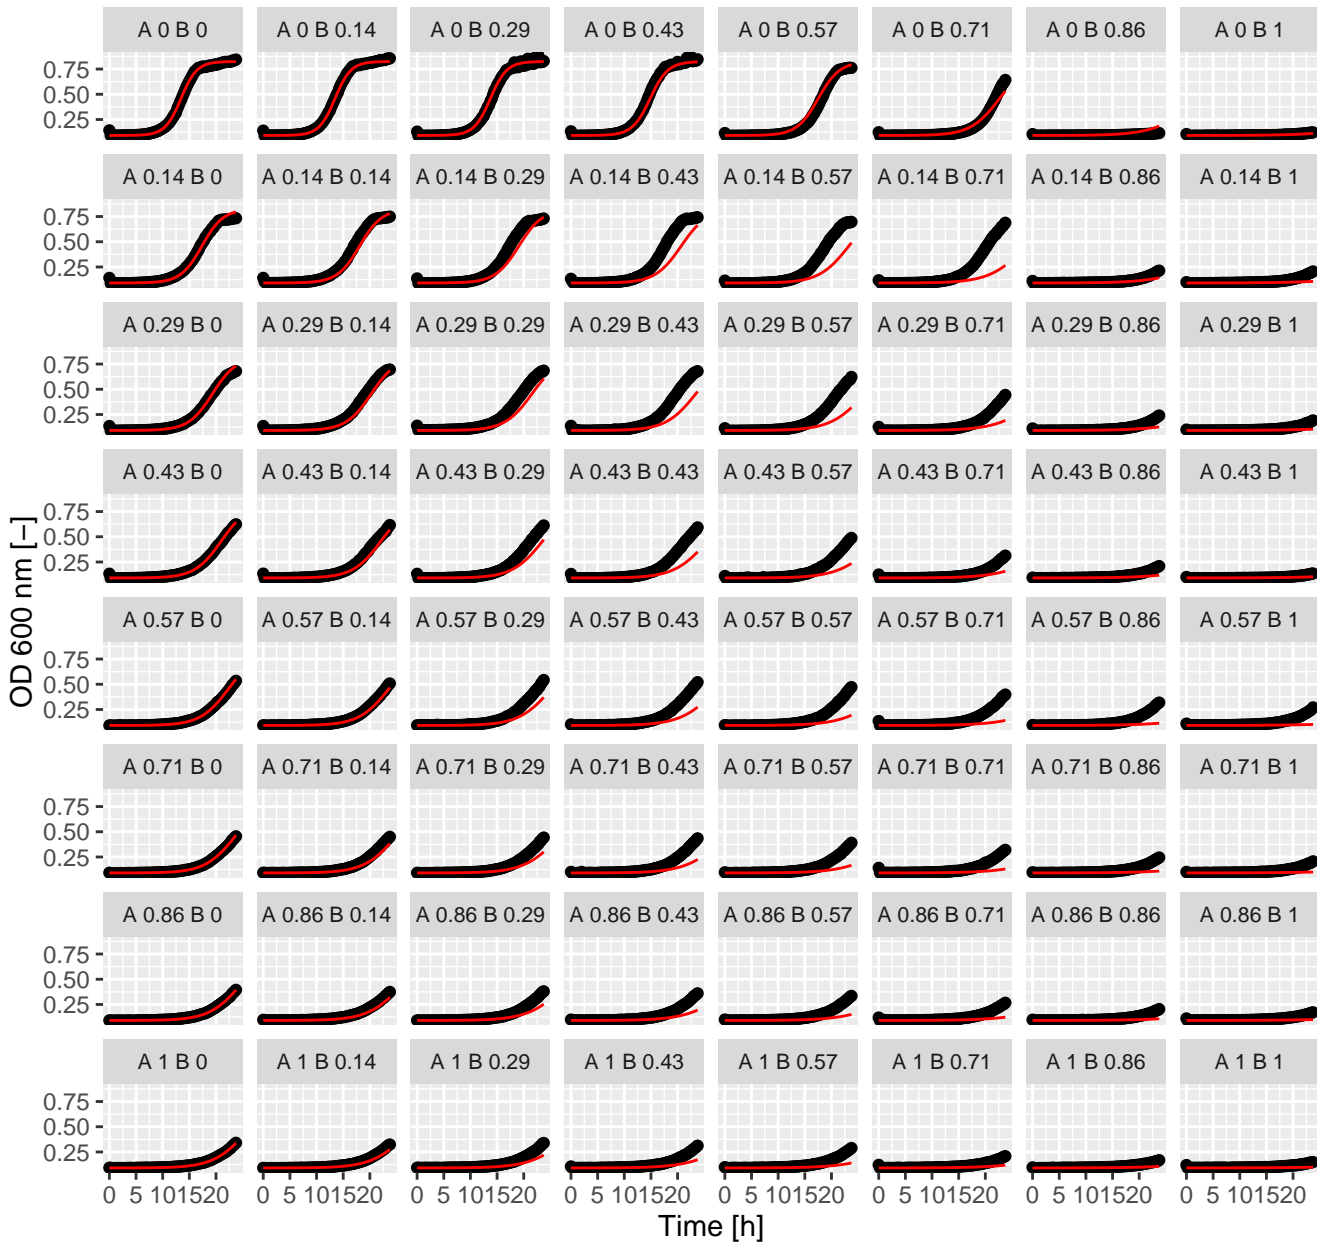

5FU.Sta (= Ax.Bx) full GPD1  
Int\_AB = 1.24 and Int\_BA = 0.27 at EC50

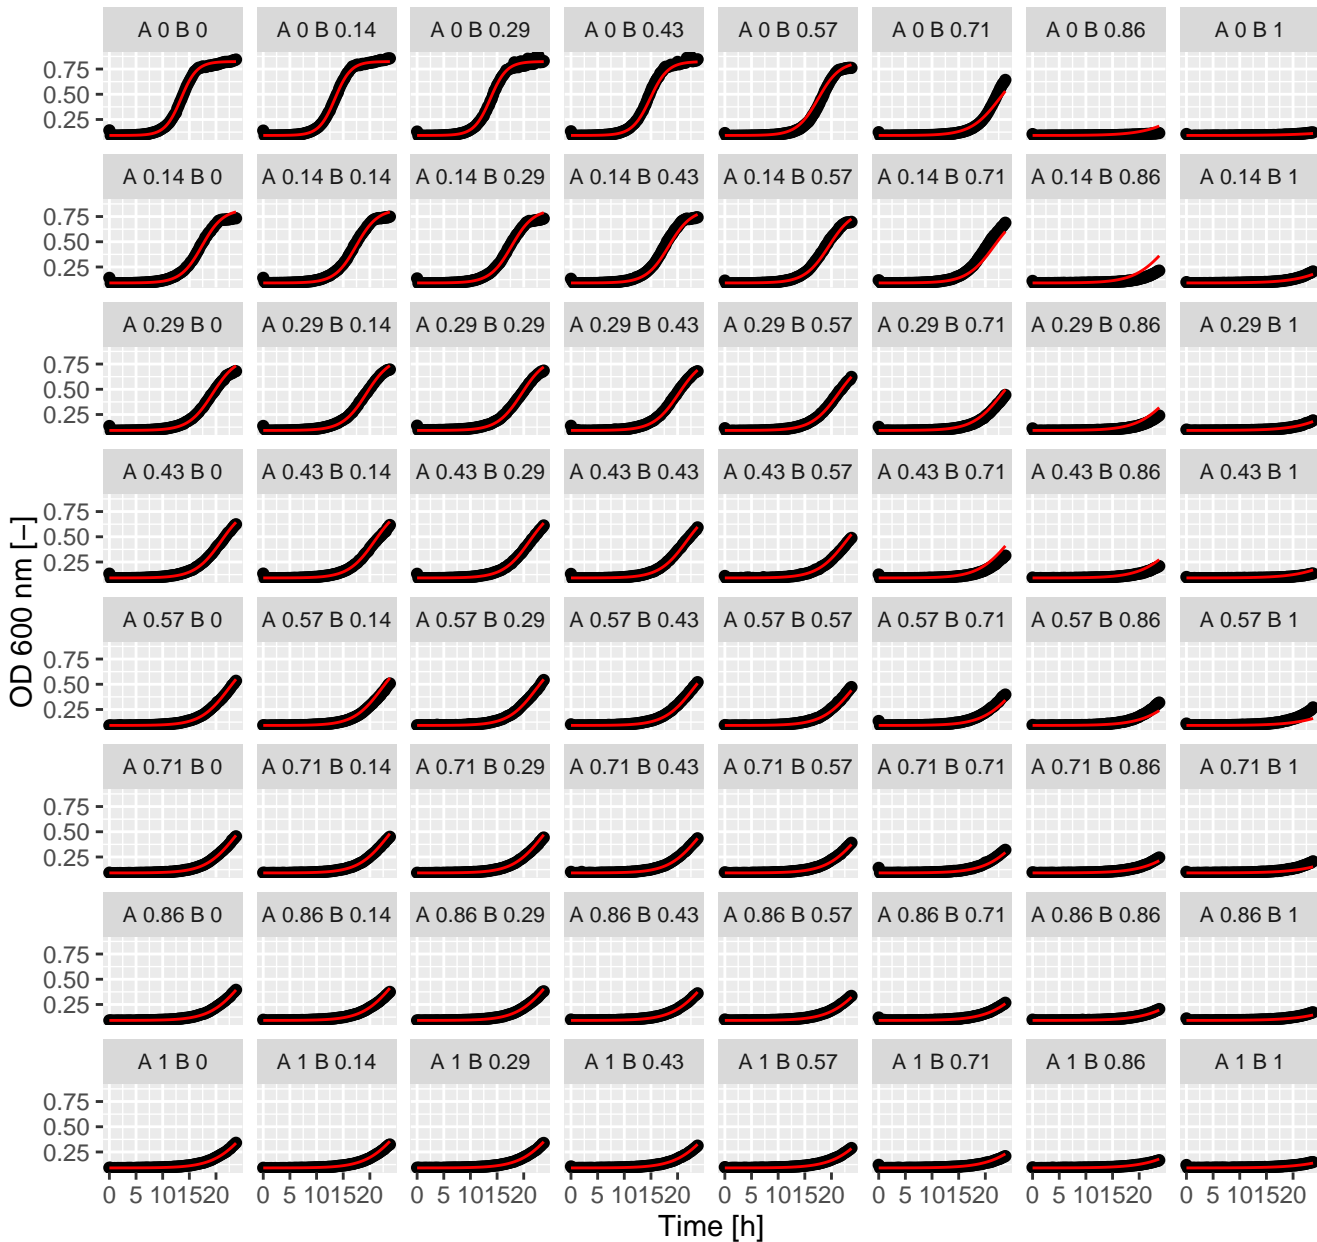

## 5FU.Tac (= Ax.Bx) exp. additivity (LA)

Int\_AB = 0 and Int\_BA = 0 at EC50

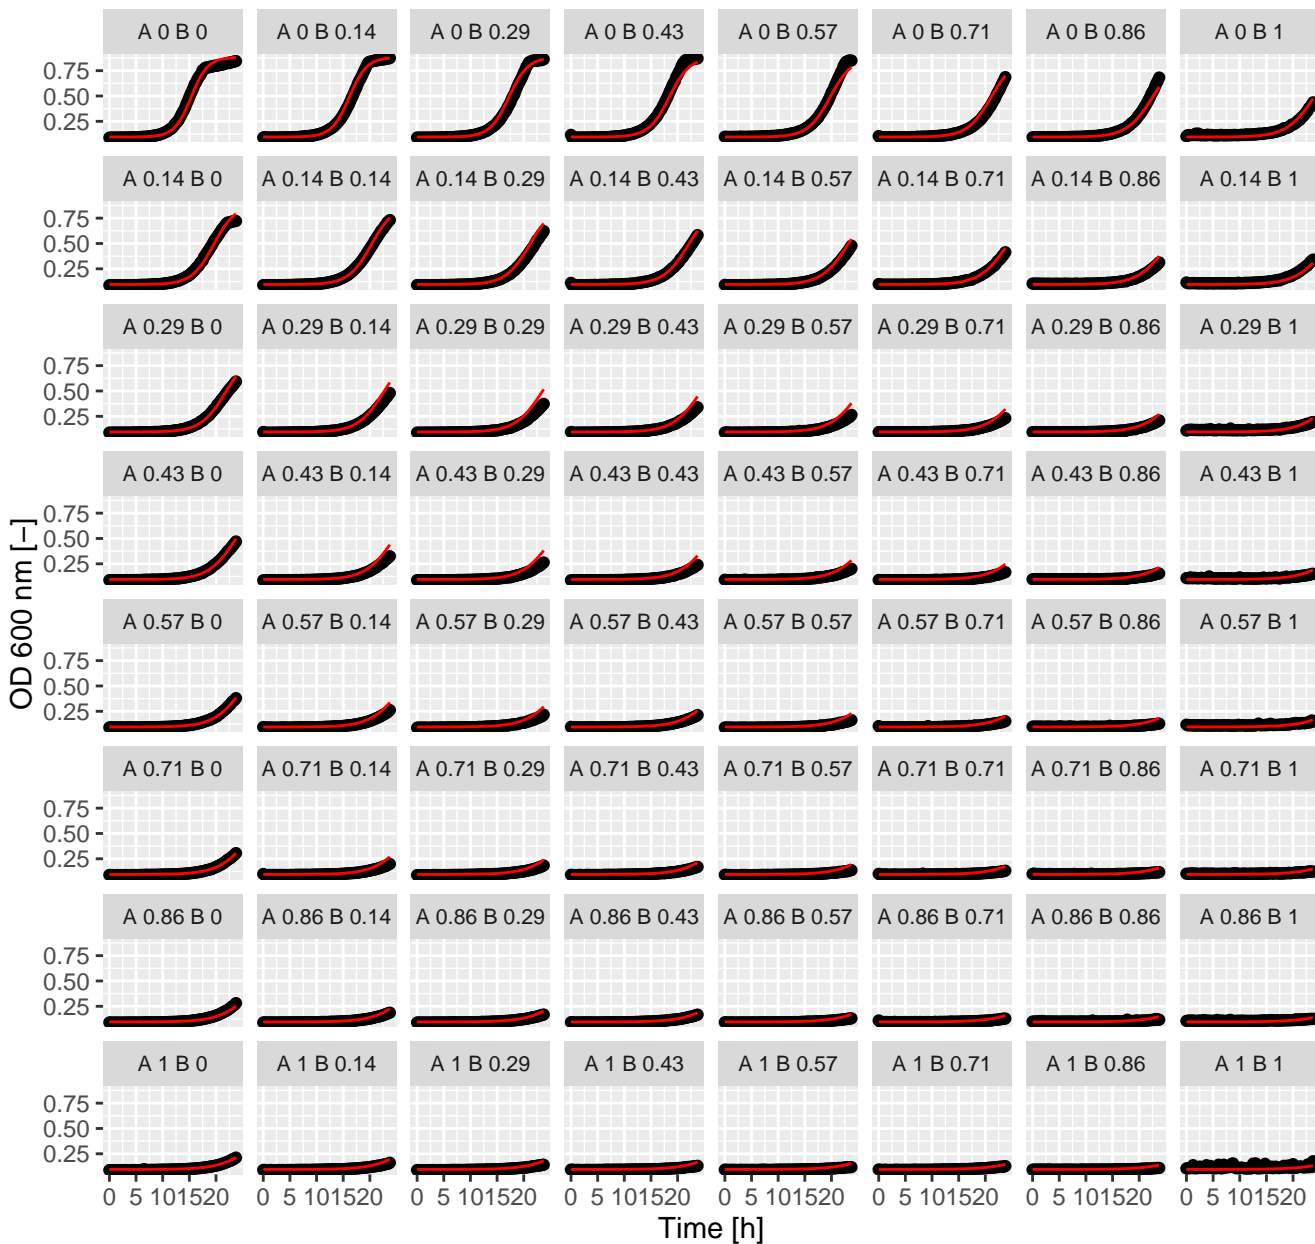

5FU.Tac (= Ax.Bx) full GPDI  
Int\_AB = -0.58 and Int\_BA = 0.48 at EC50

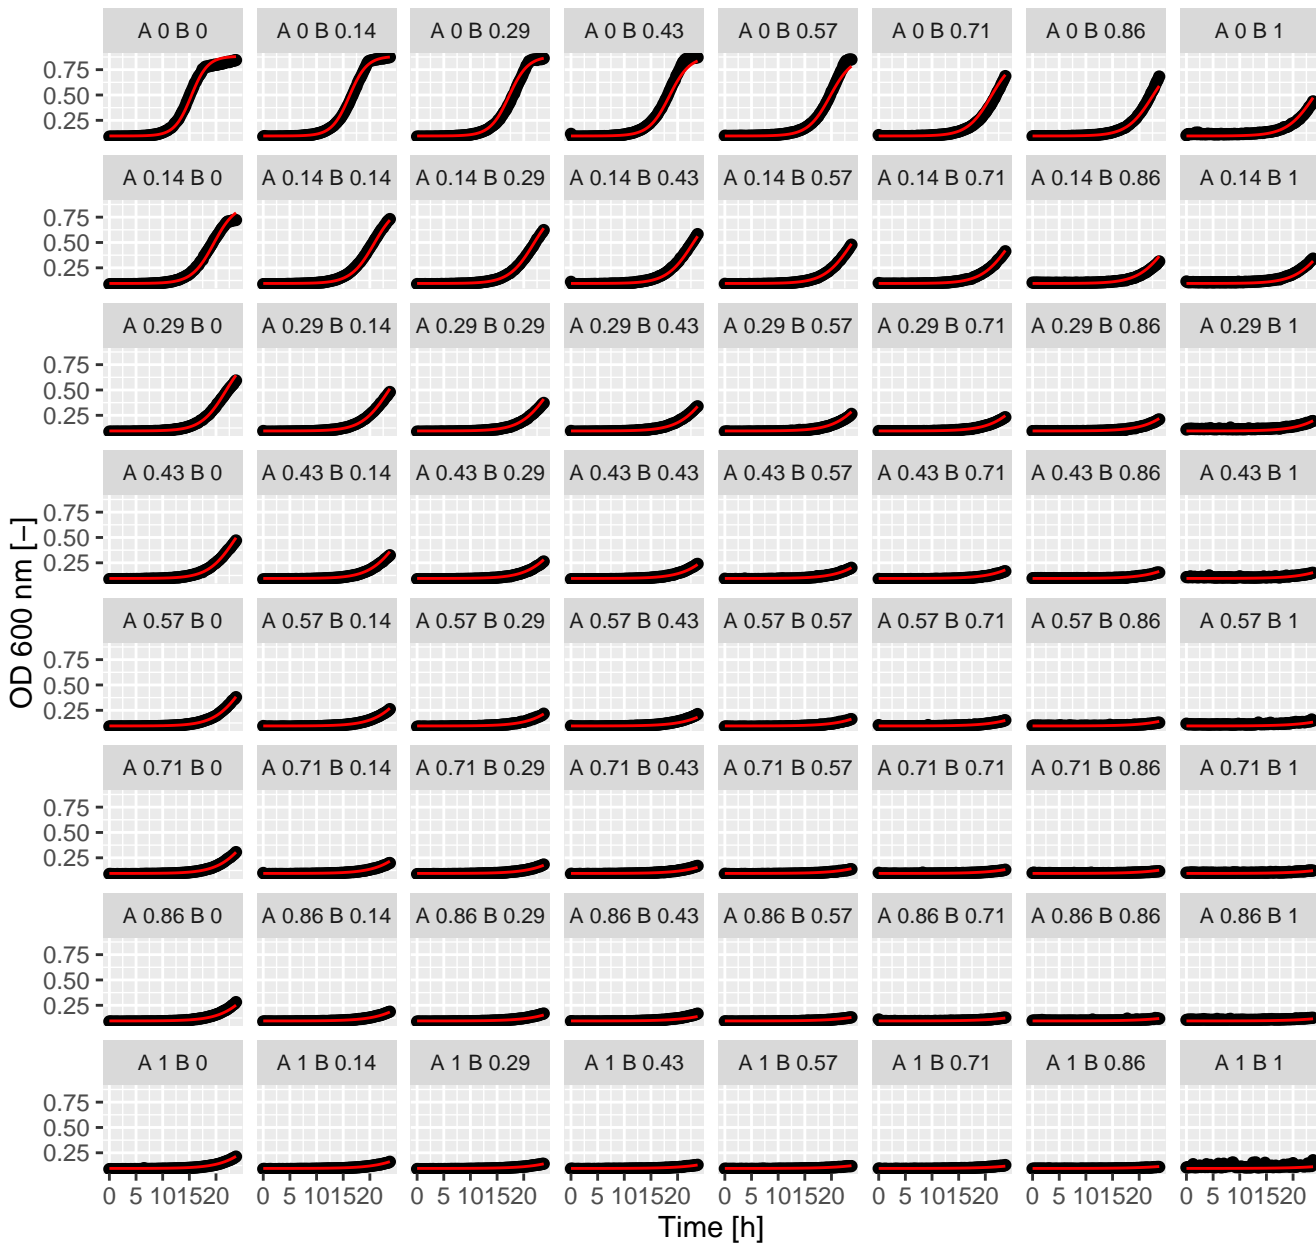

5FU.Ter (= Ax.Bx) exp. additivity (LA)  
Int\_AB = 0 and Int\_BA = 0 at EC50

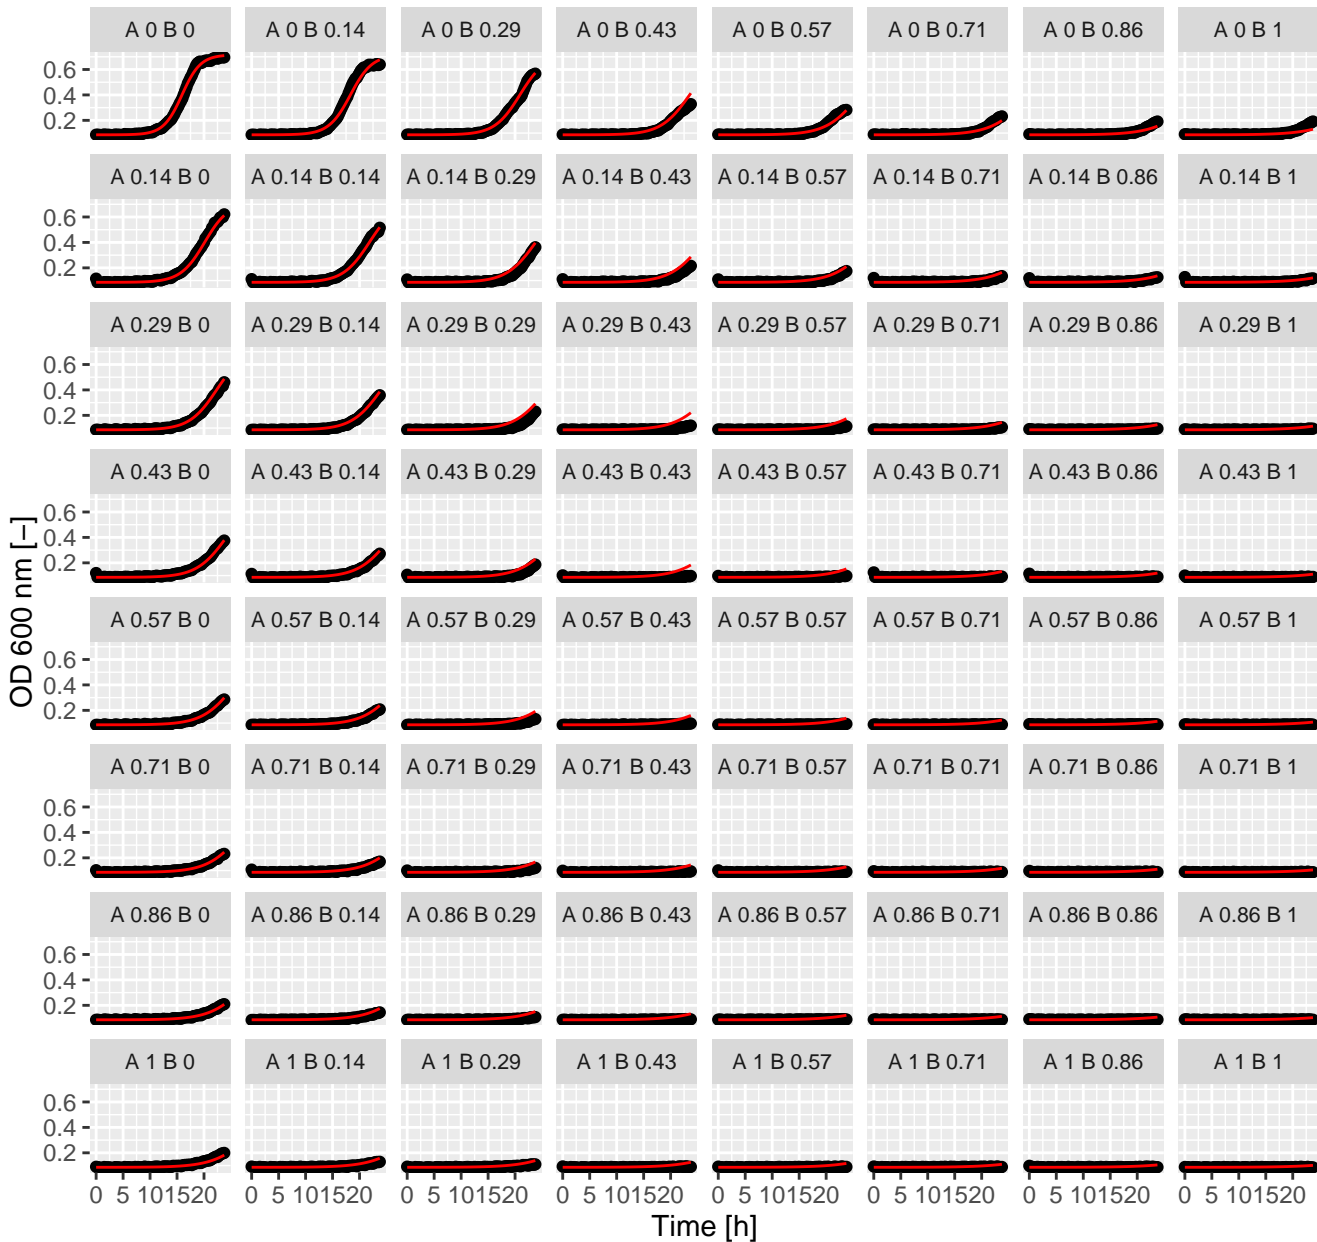

5FU.Ter (= Ax.Bx) full GPDI  
Int\_AB = 1.85 and Int\_BA = -0.78 at EC50

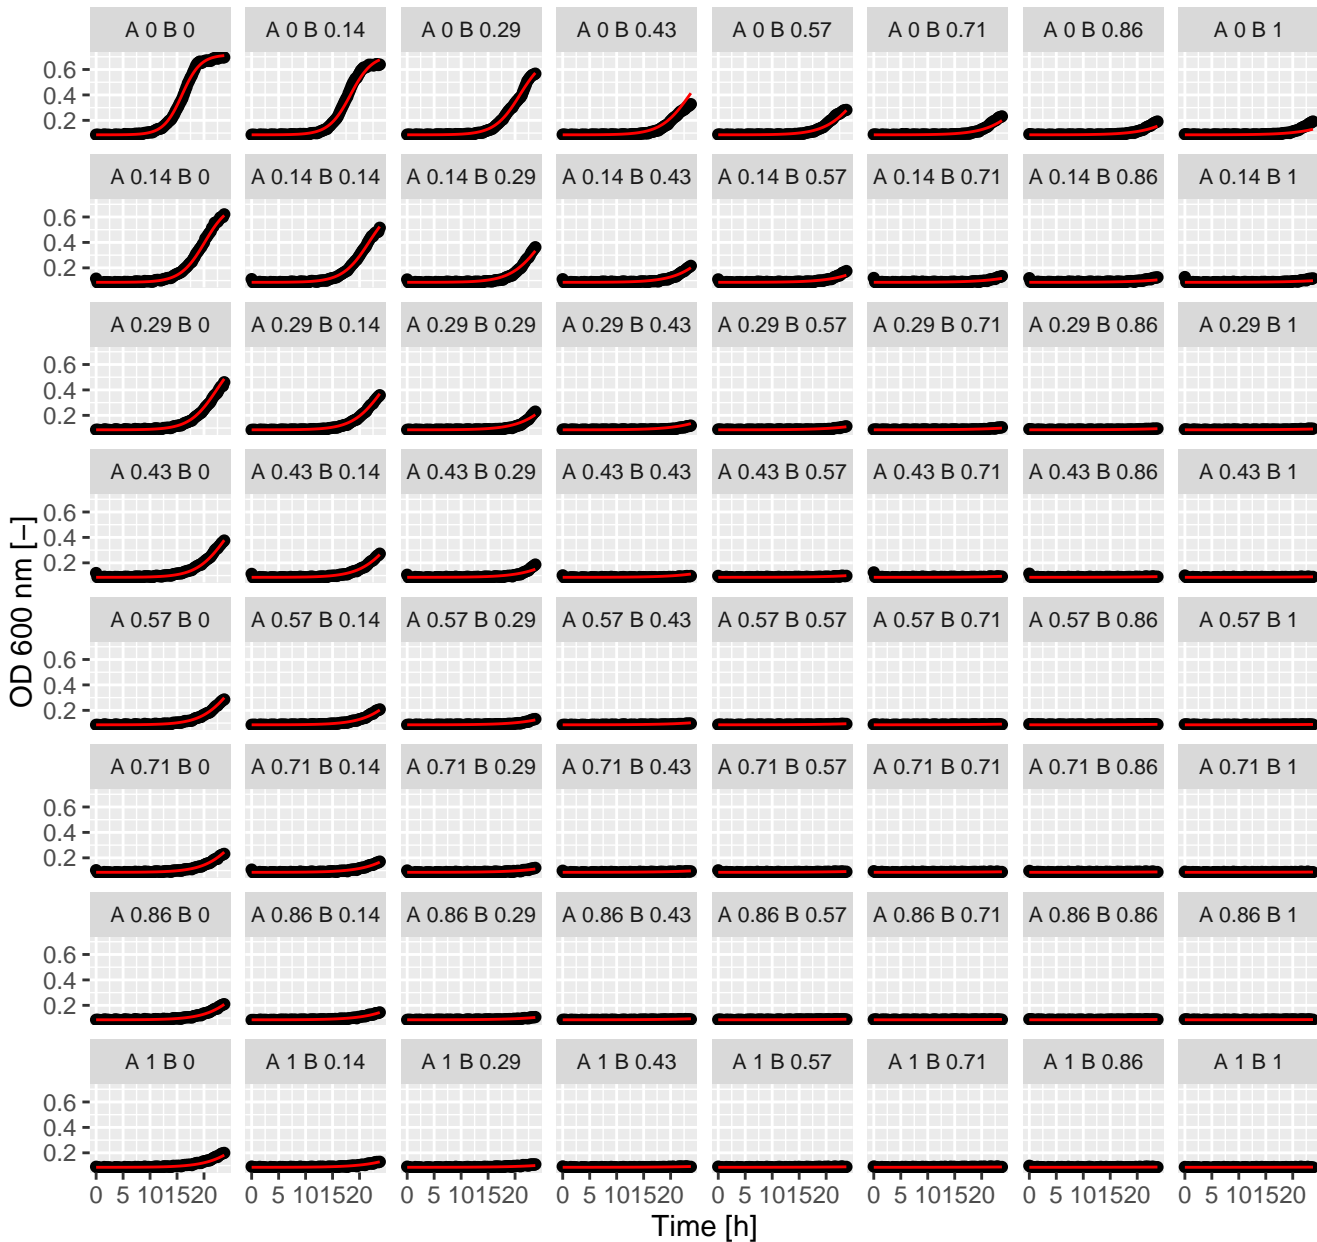



AbA.Lit (= Ax.Bx) exp. additivity (LA)  
Int\_AB = 0 and Int\_BA = 0 at EC50

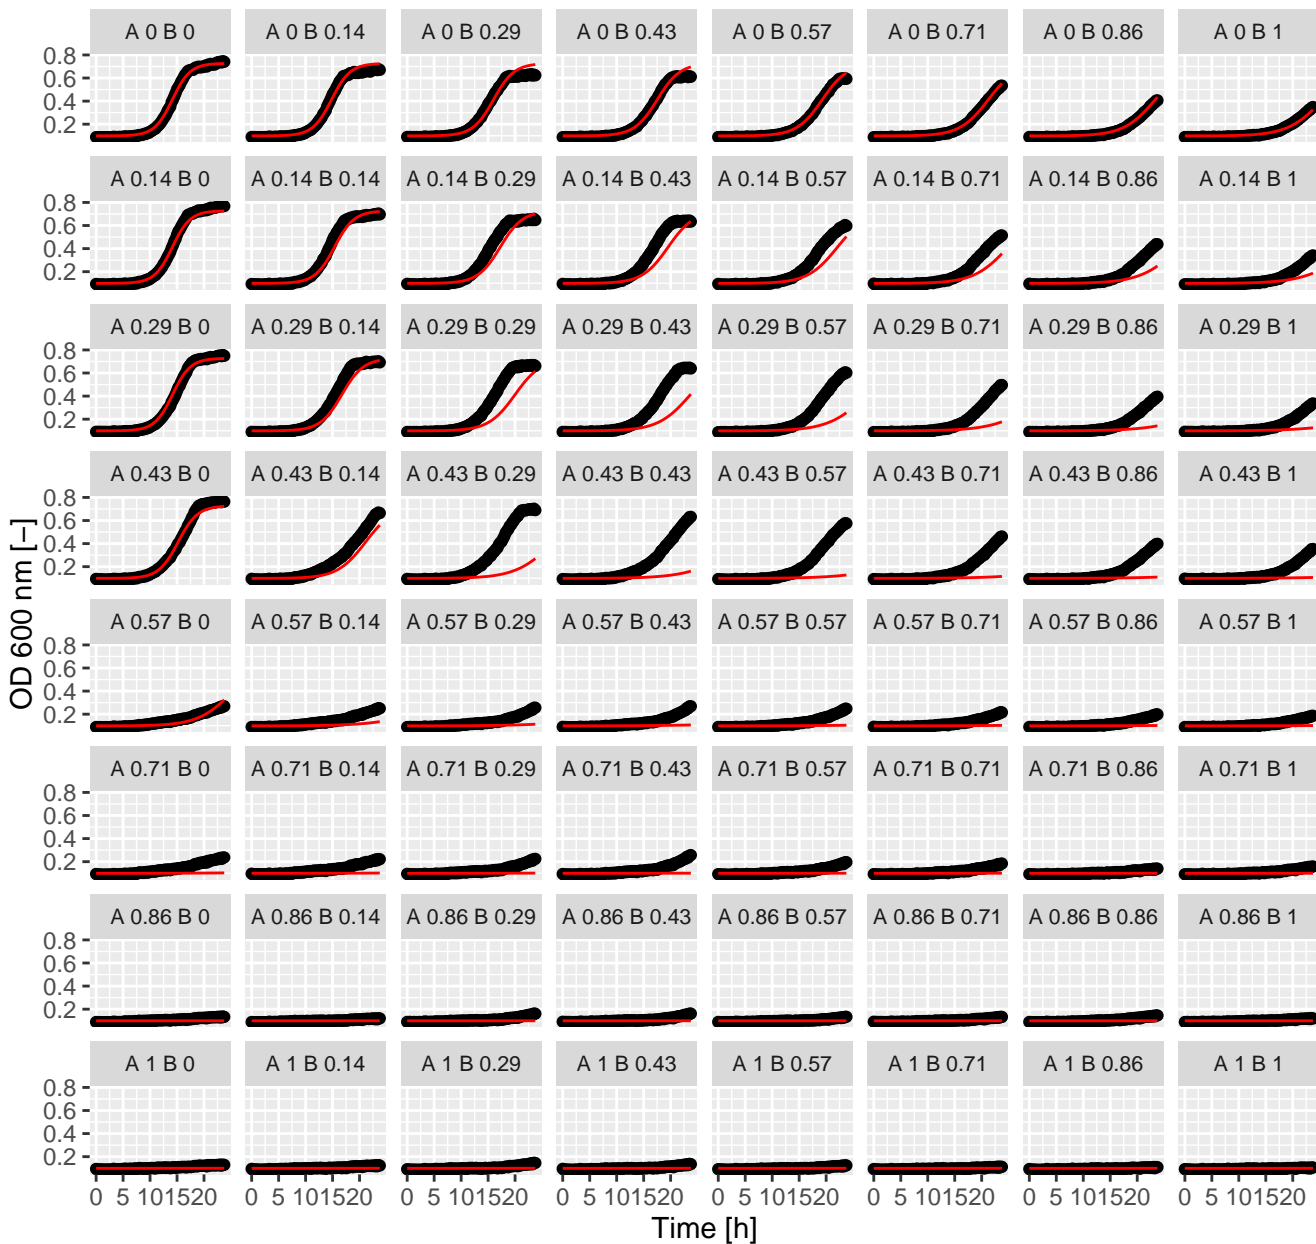

AbA.Lit (= Ax.Bx) full GPDI  
Int\_AB = 0.57 and Int\_BA = 1.25 at EC50

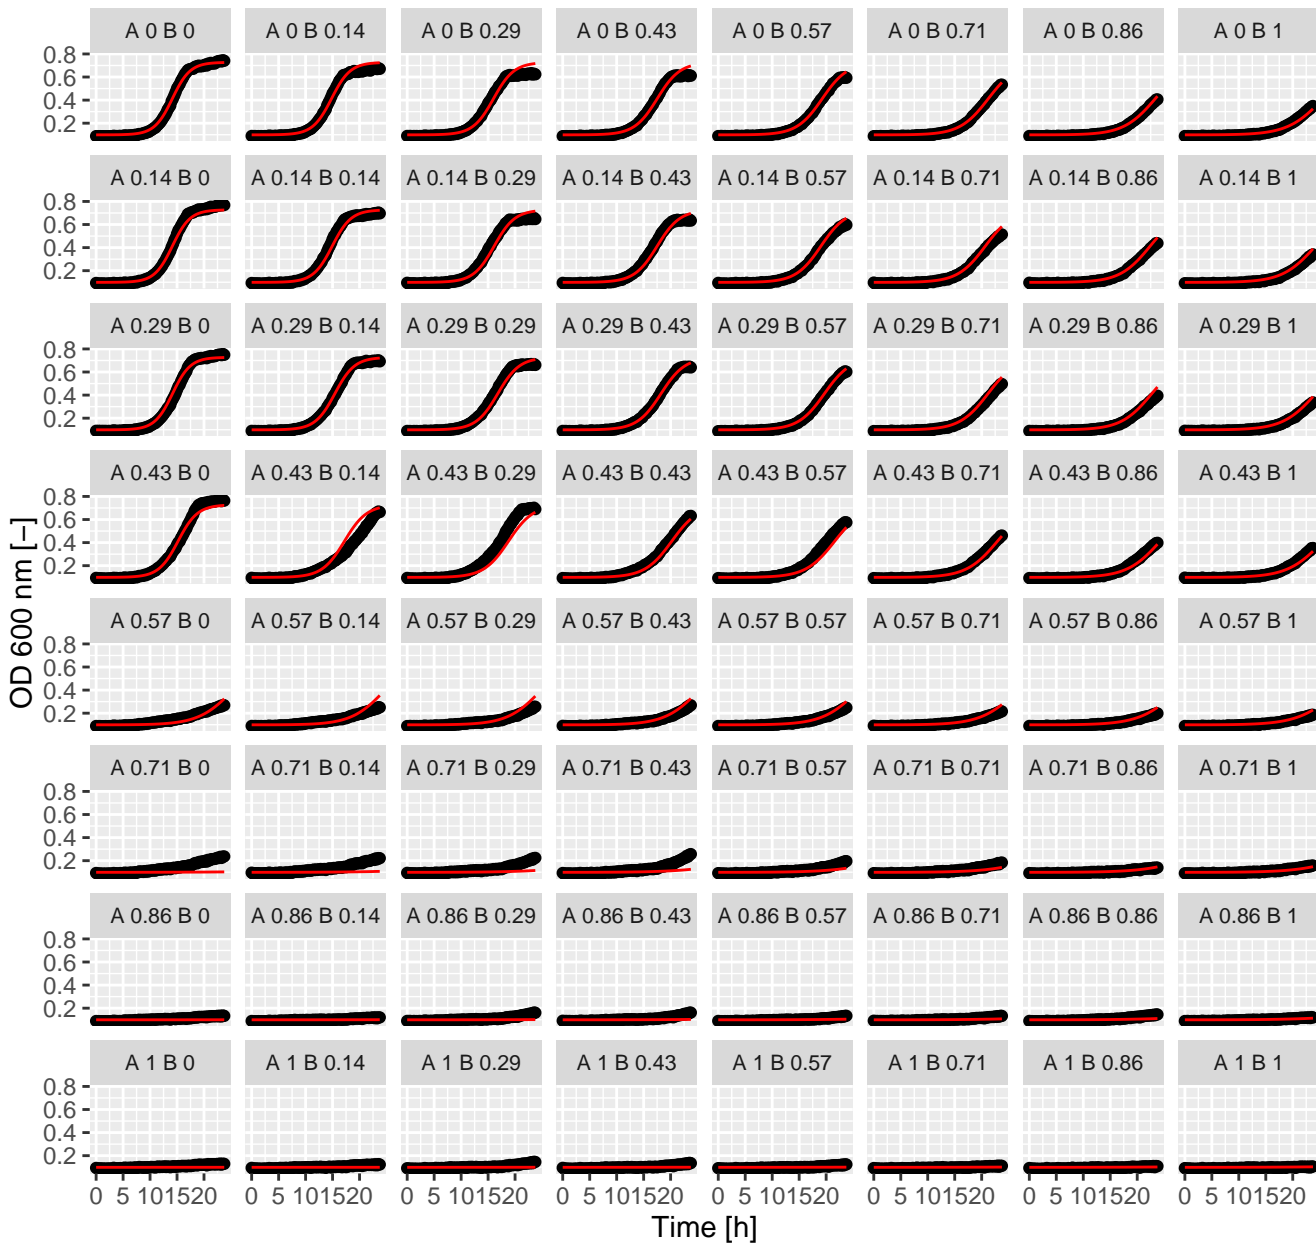

AbA.Wor (= Ax.Bx) exp. additivity (LA)  
Int\_AB = 0 and Int\_BA = 0 at EC50

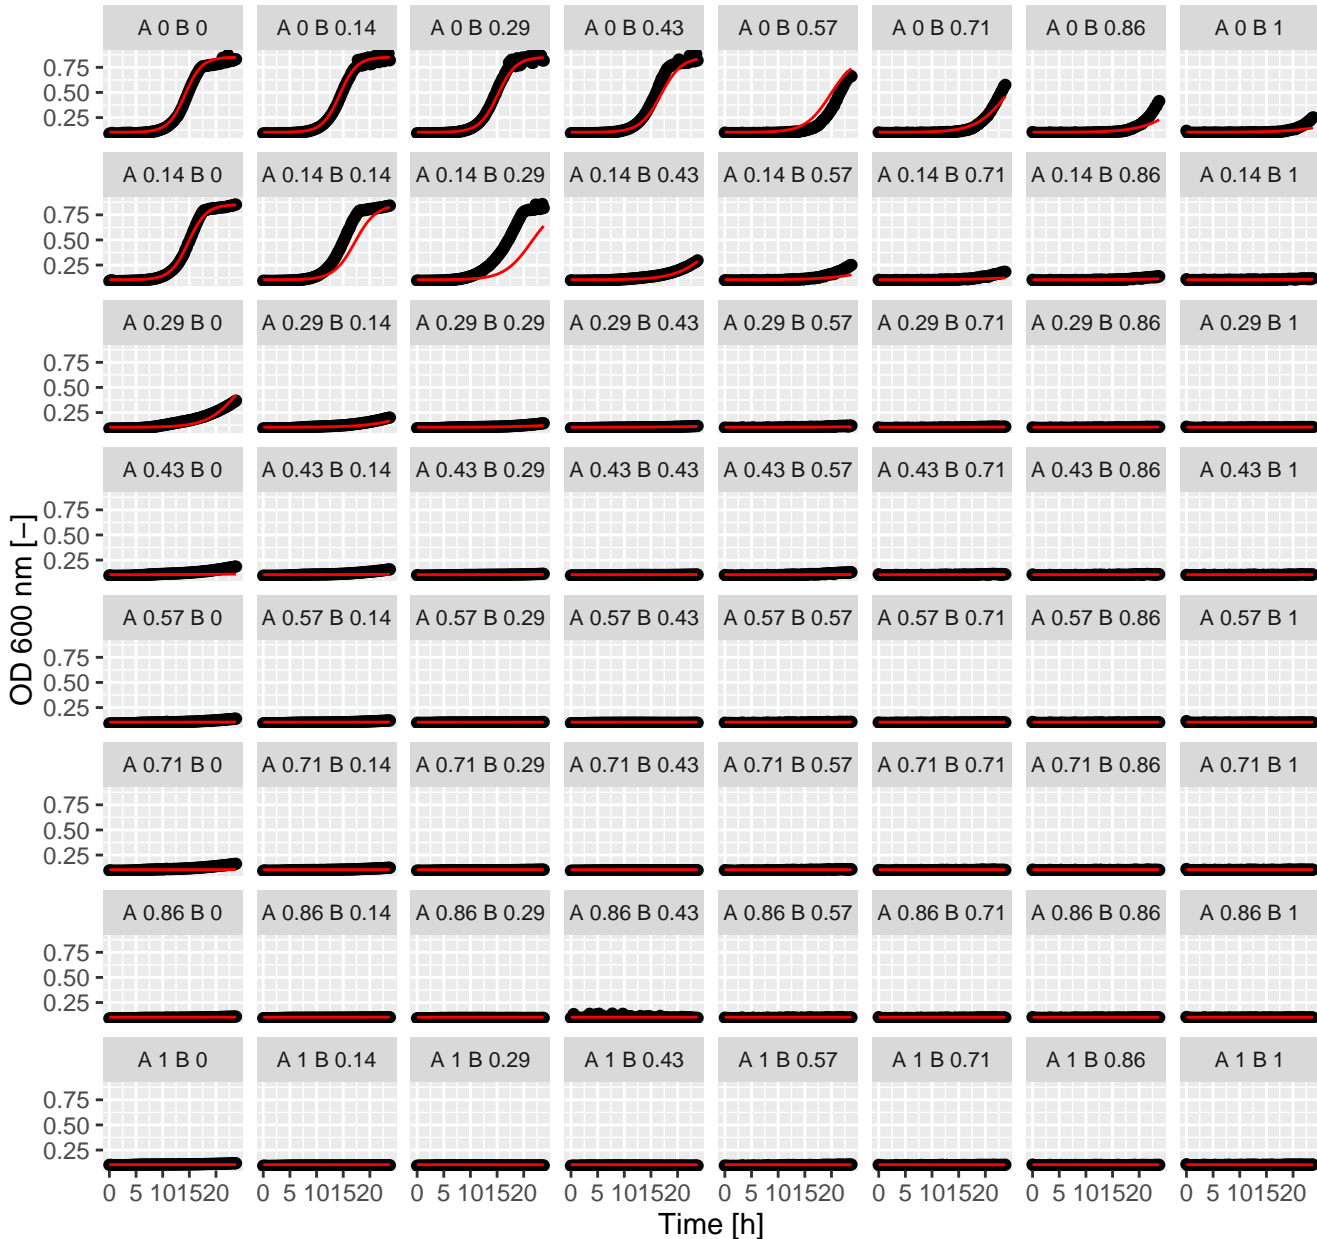

AbA.Wor (= Ax.Bx) full GPDI  
 Int\_AB = 0.14 and Int\_BA = 0.16 at EC50

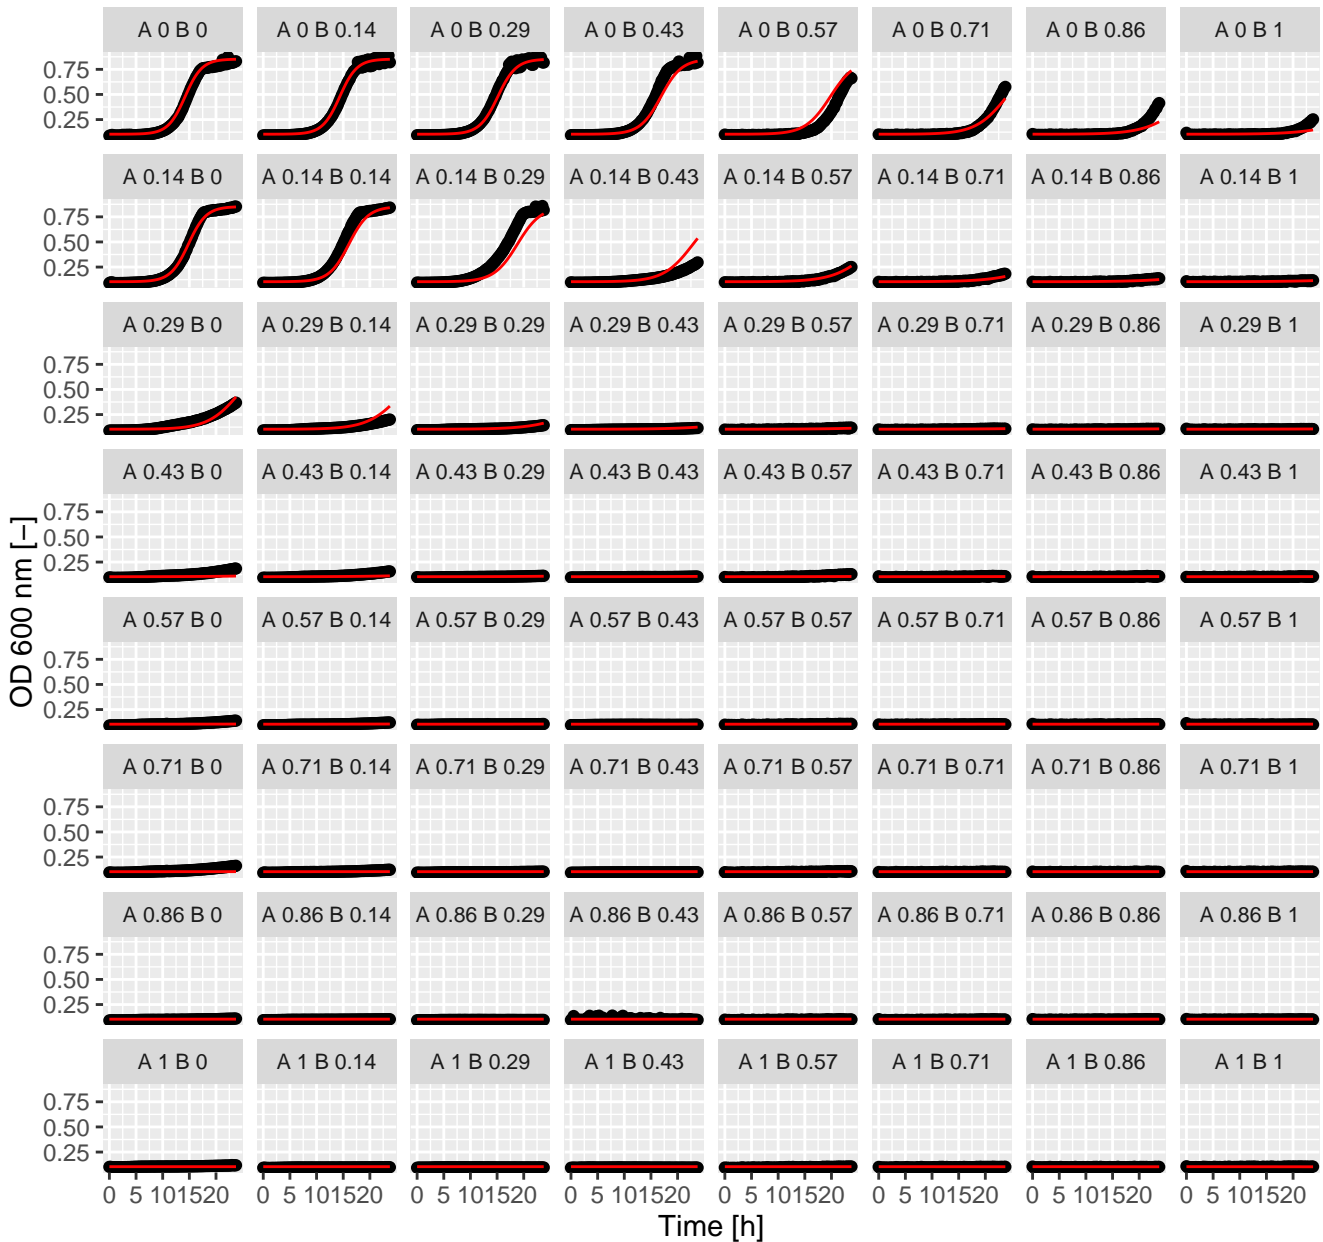

AmB.AmB (= Ax.Bx) exp. additivity (LA)  
Int\_AB = 0 and Int\_BA = 0 at EC50

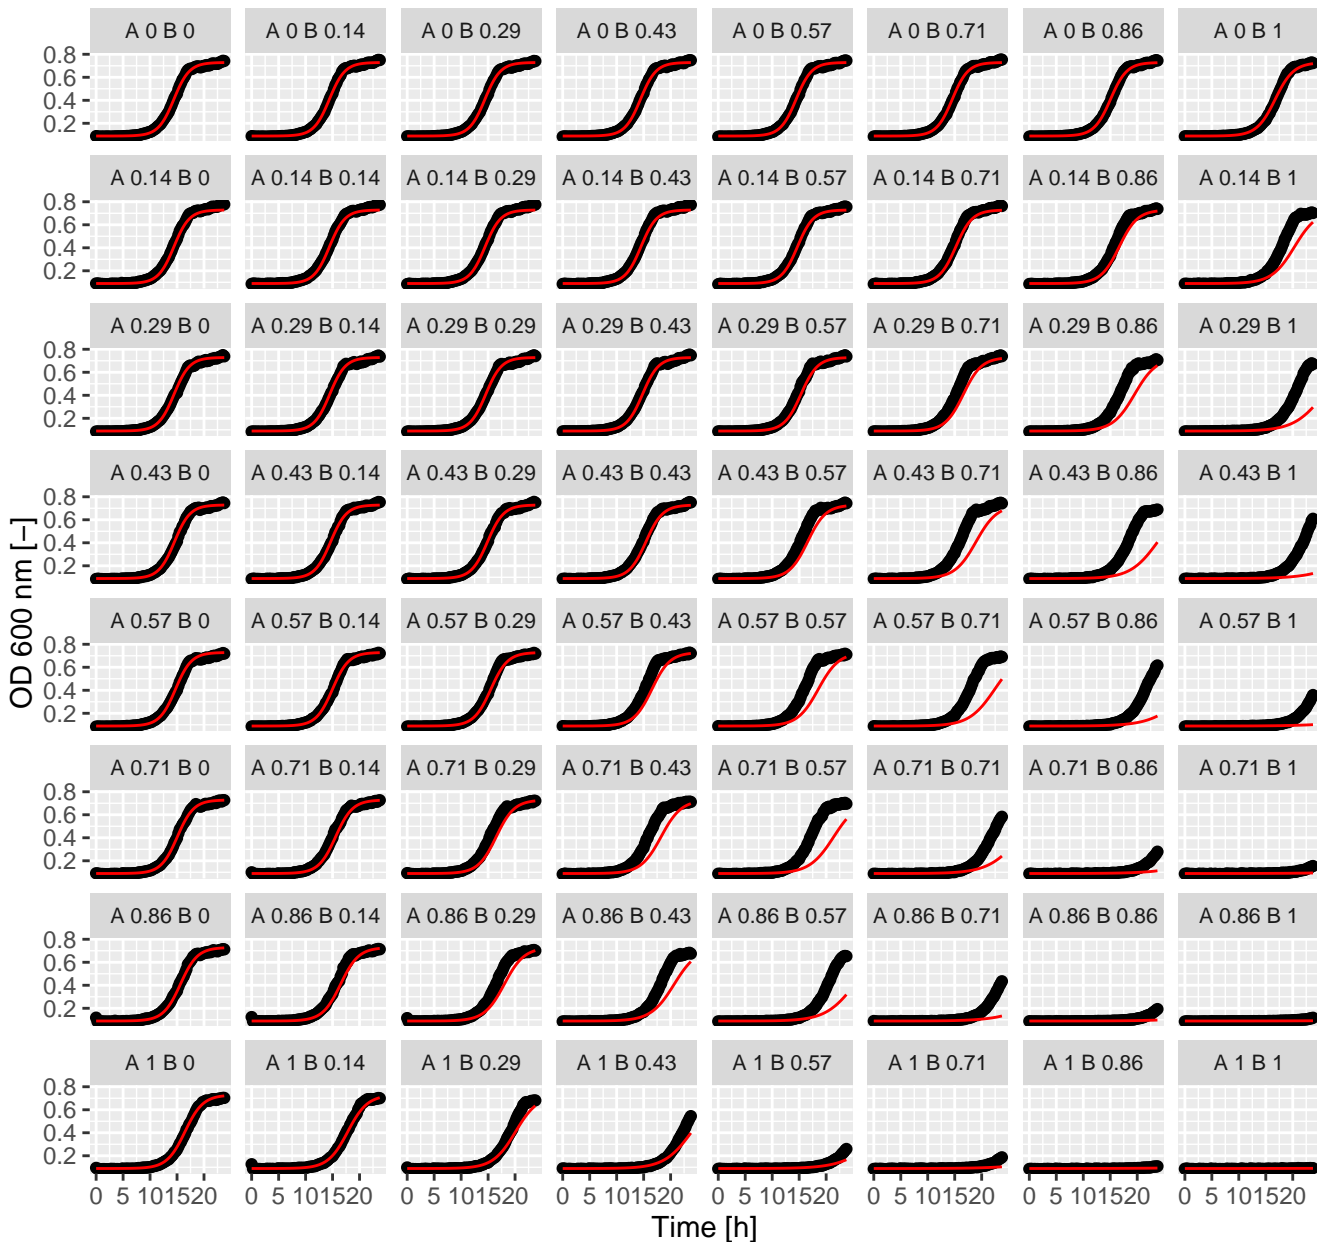

AmB.AmB (= Ax.Bx) full GPDI  
Int\_AB = 0.05 and Int\_BA = 0.26 at EC50

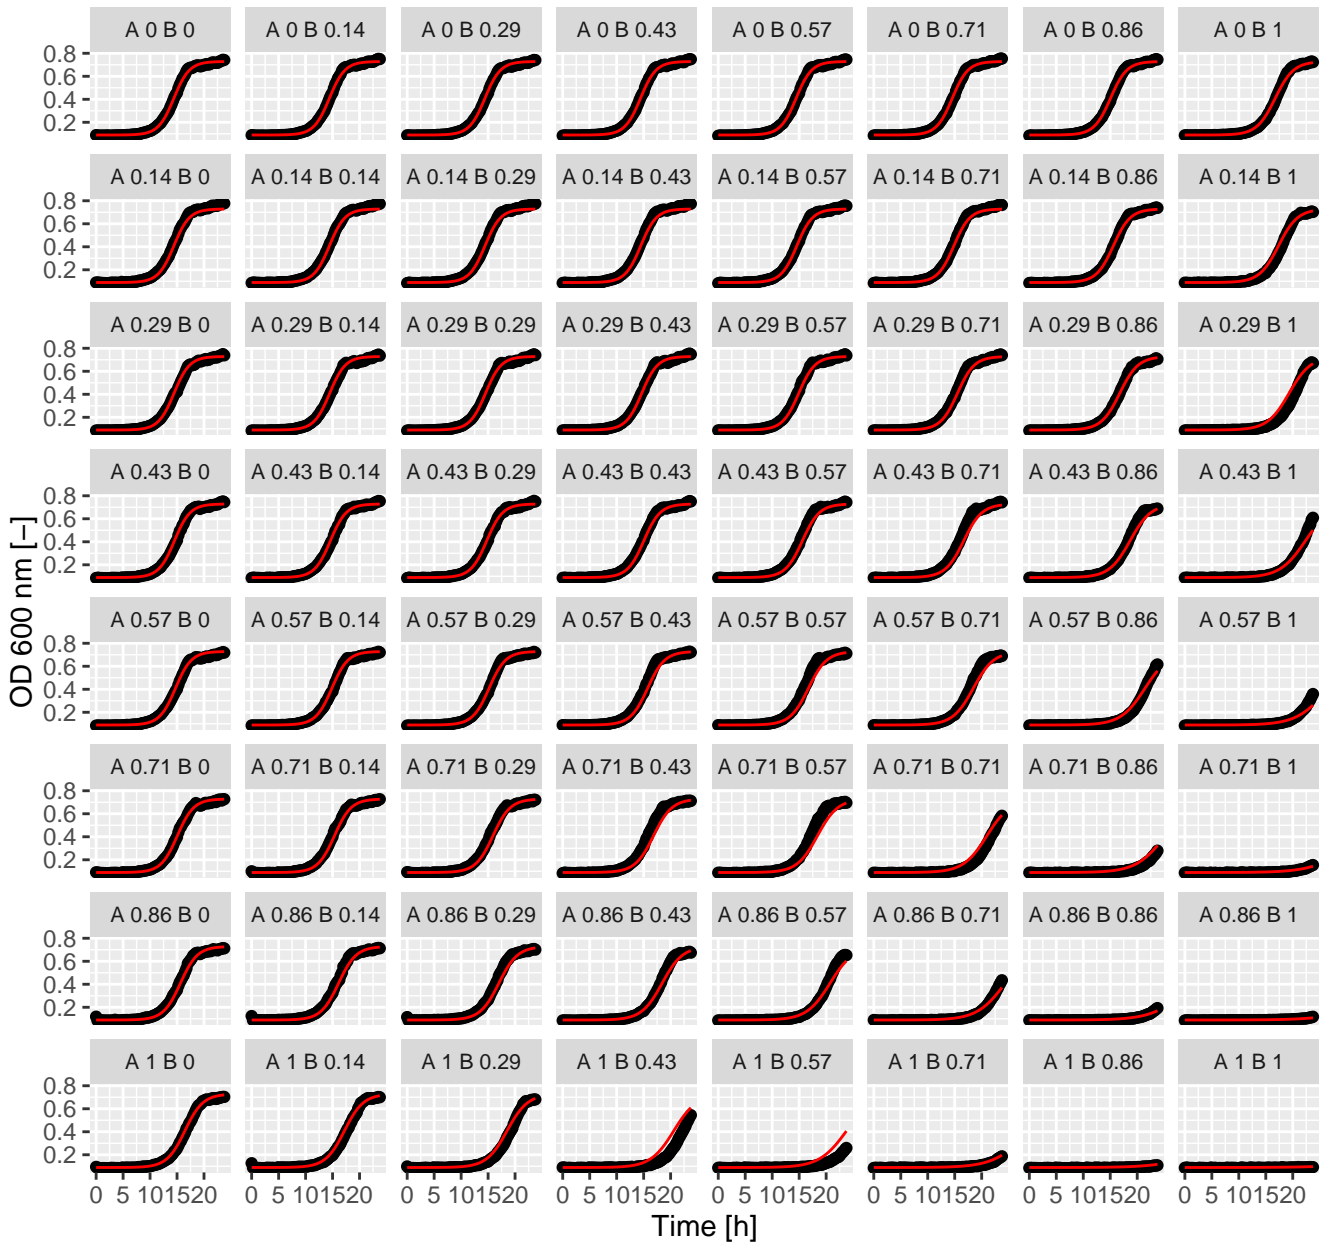

AmB.Ben (= Ax.Bx) exp. additivity (LA)  
Int\_AB = 0 and Int\_BA = 0 at EC50

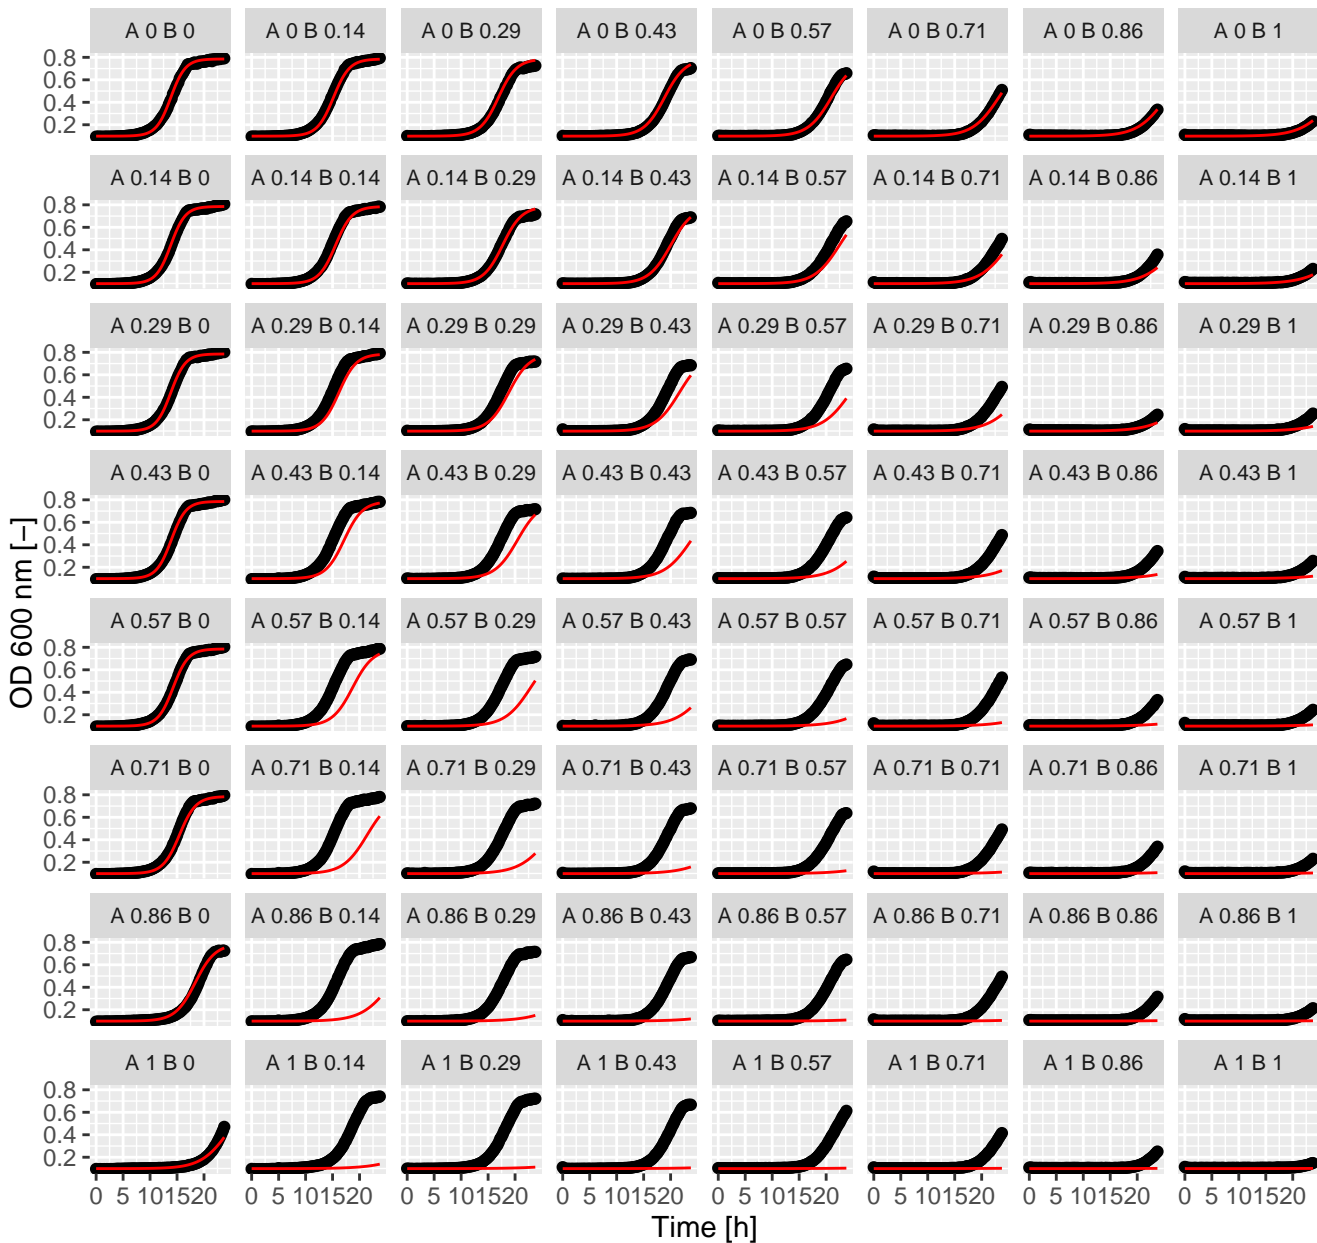

AmB.Ben (= Ax.Bx) full GPDI  
Int\_AB = 2.32 and Int\_BA = 0.36 at EC50

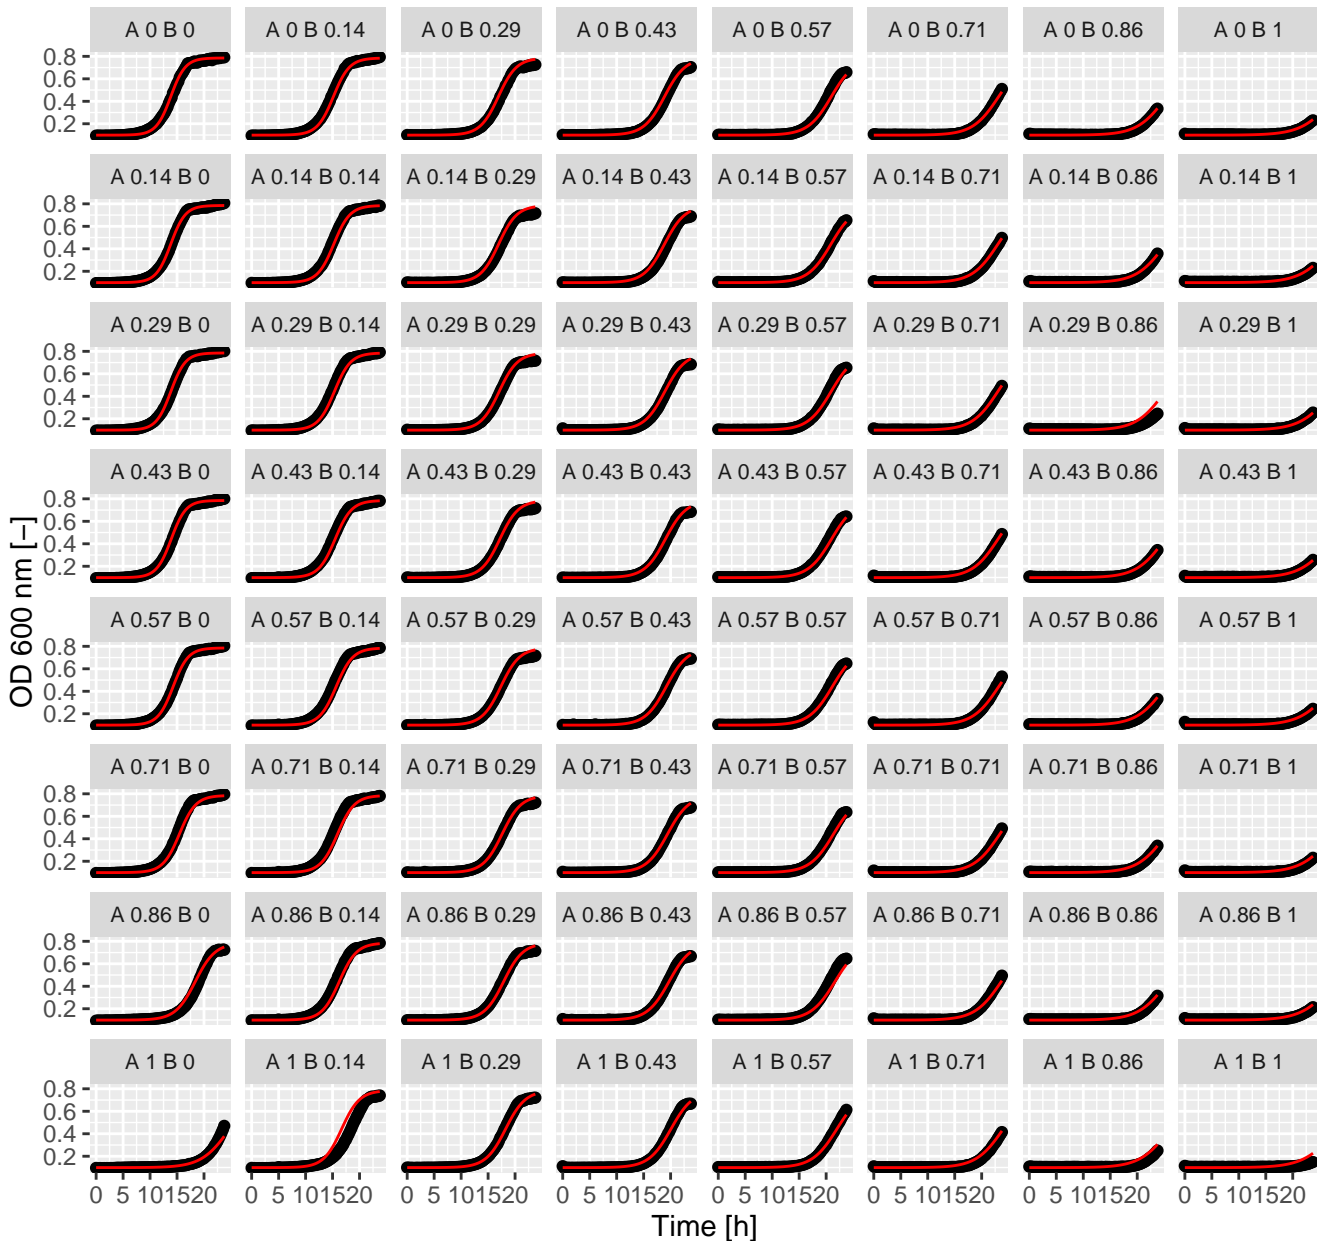



AmB.Pen (= Ax.Bx) exp. additivity (LA)  
Int\_AB = 0 and Int\_BA = 0 at EC50

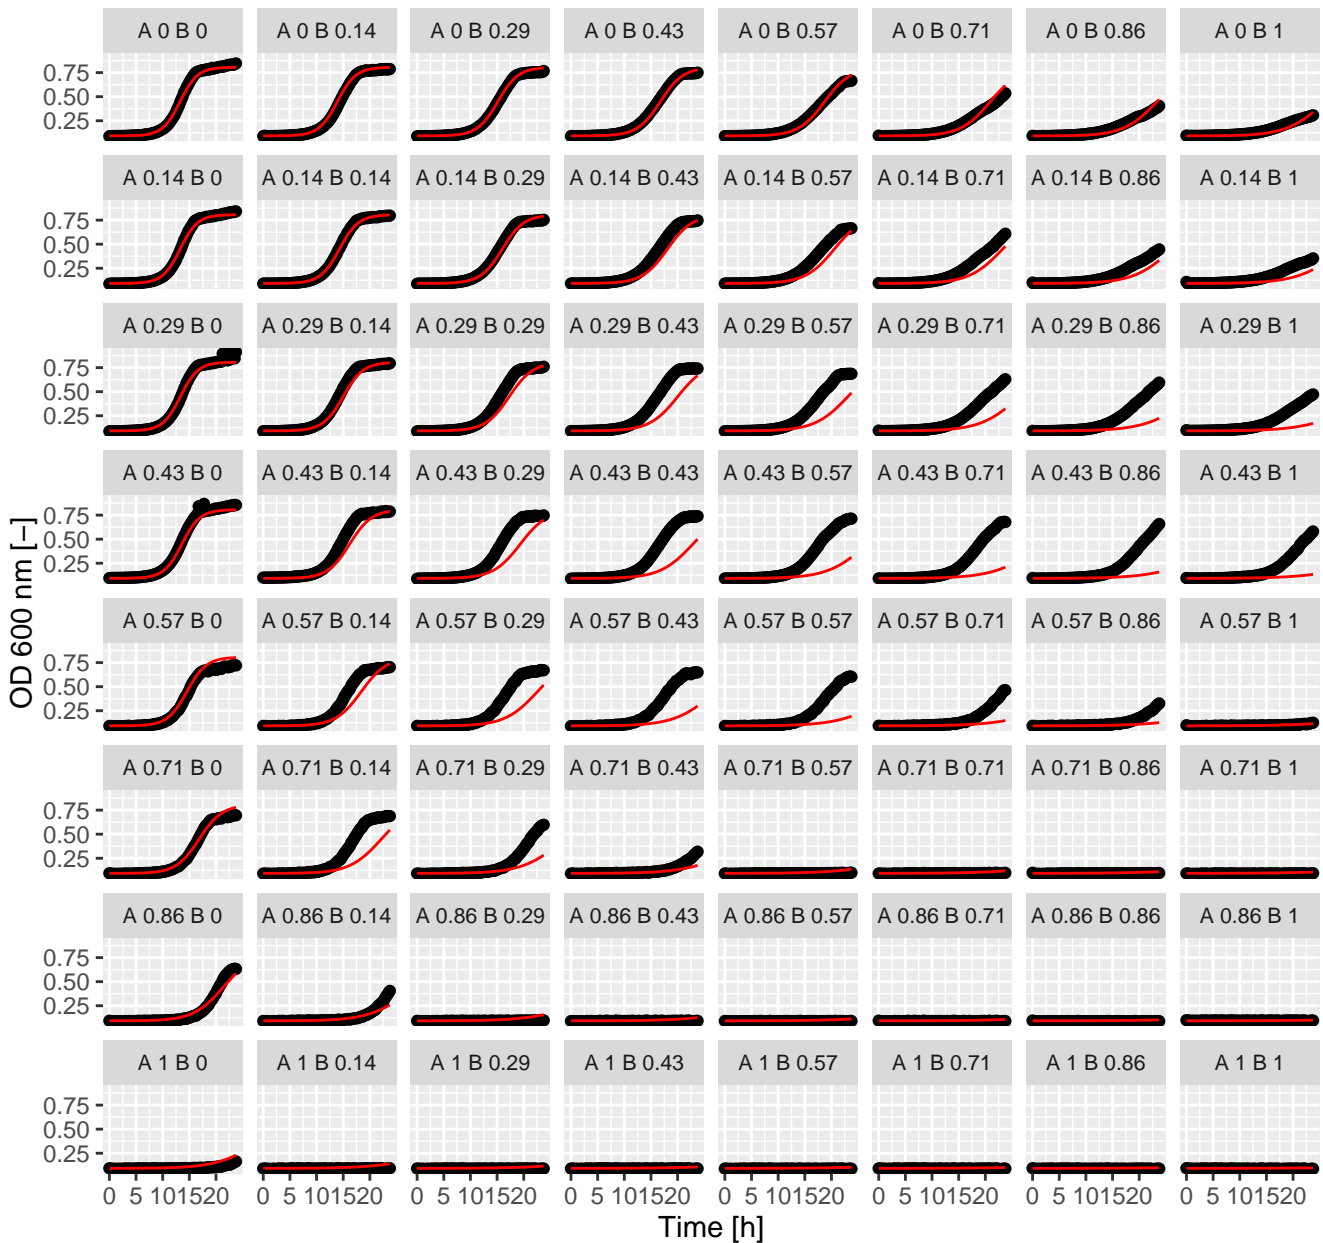

AmB.Pen (= Ax.Bx) full GPDI  
Int\_AB = -0.17 and Int\_BA = 3.32 at EC50

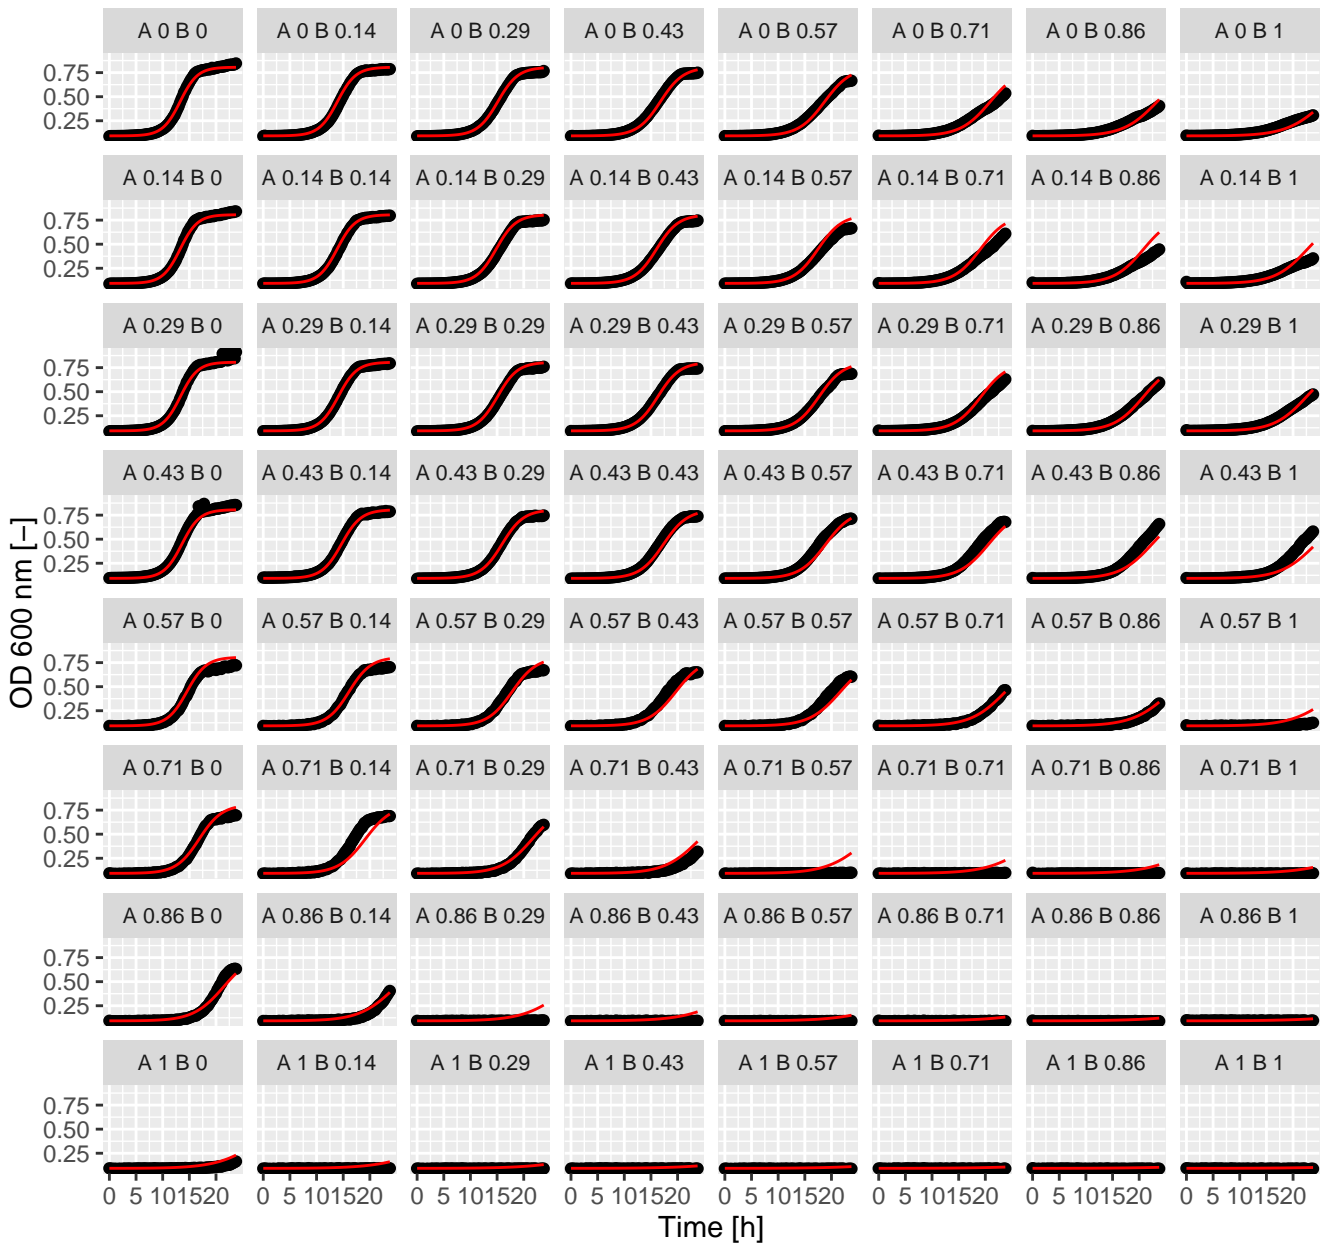

AmB.Sta (= Ax.Bx) exp. additivity (LA)  
Int\_AB = 0 and Int\_BA = 0 at EC50

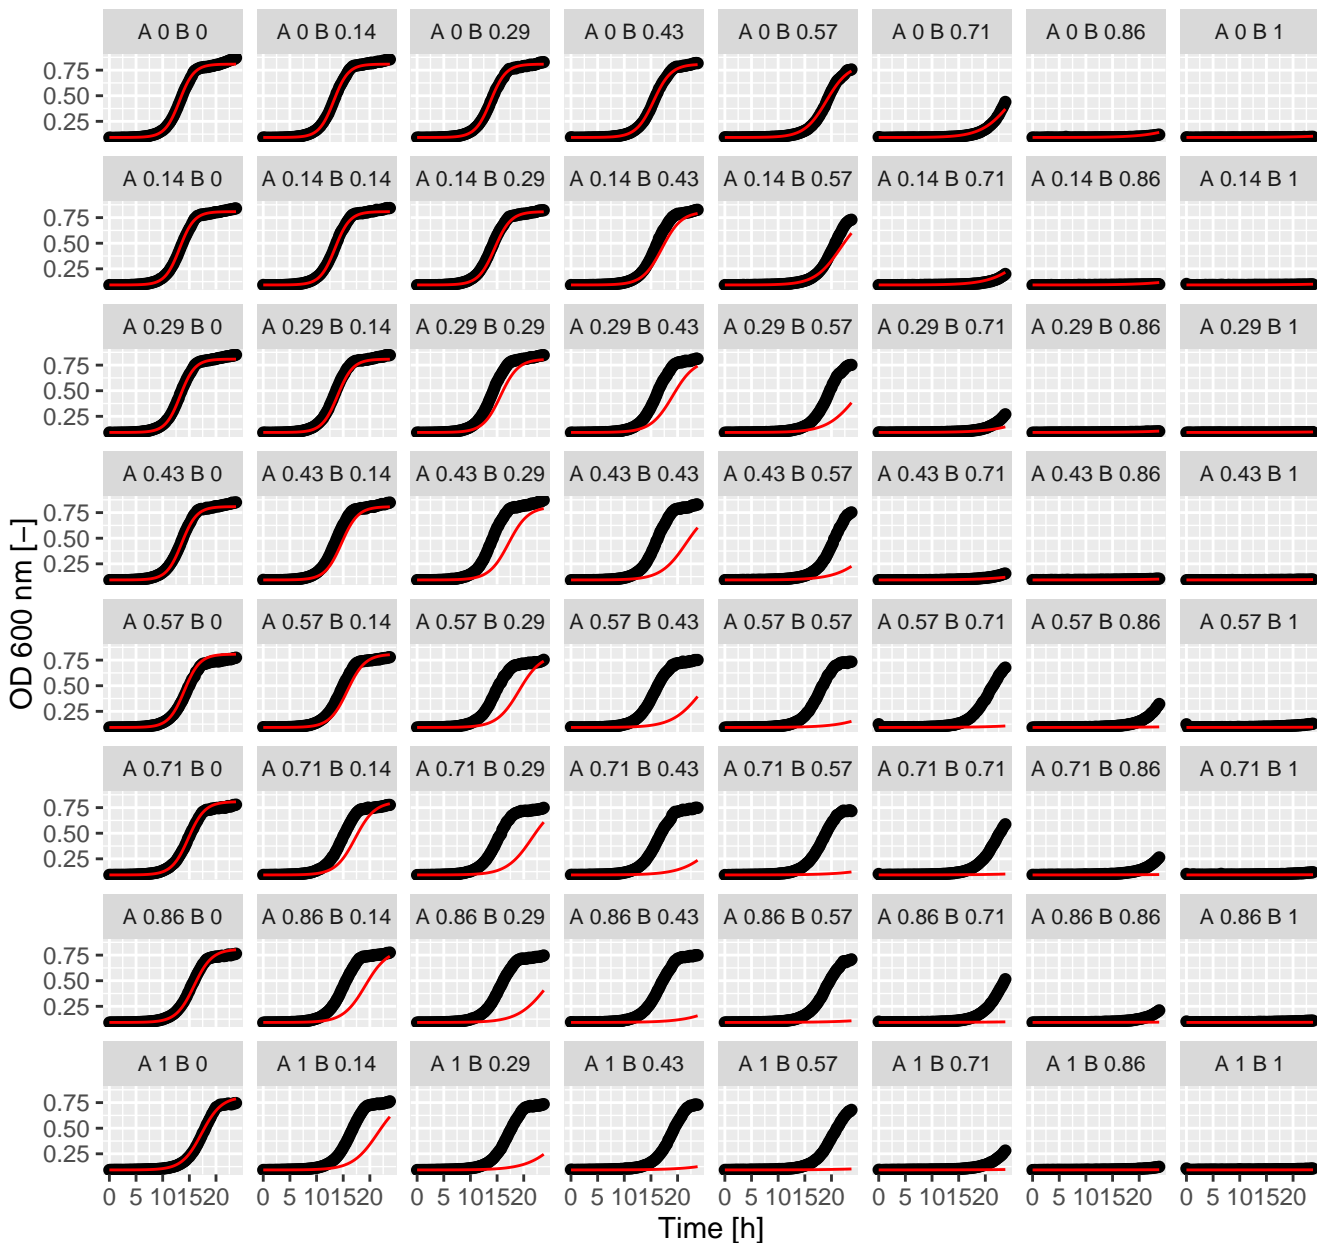

AmB.Sta (= Ax.Bx) full GPDI  
Int\_AB = 2.51 and Int\_BA = 0.43 at EC50

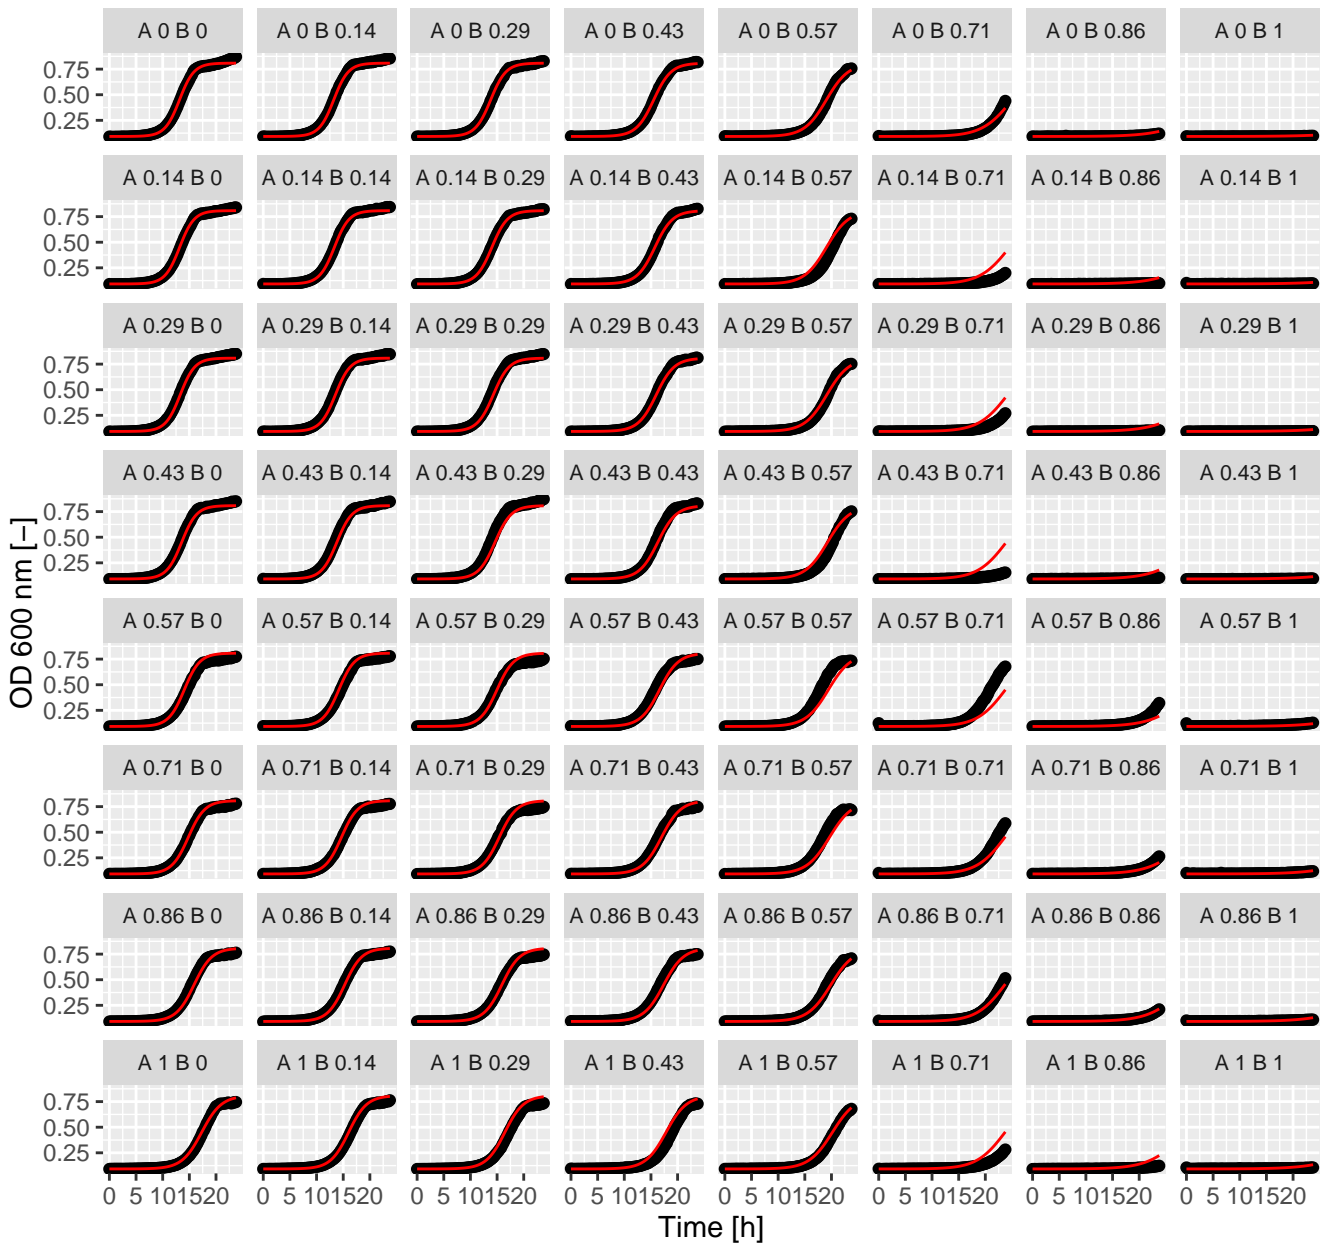

AmB.Tac (= Ax.Bx) exp. additivity (LA)  
Int\_AB = 0 and Int\_BA = 0 at EC50

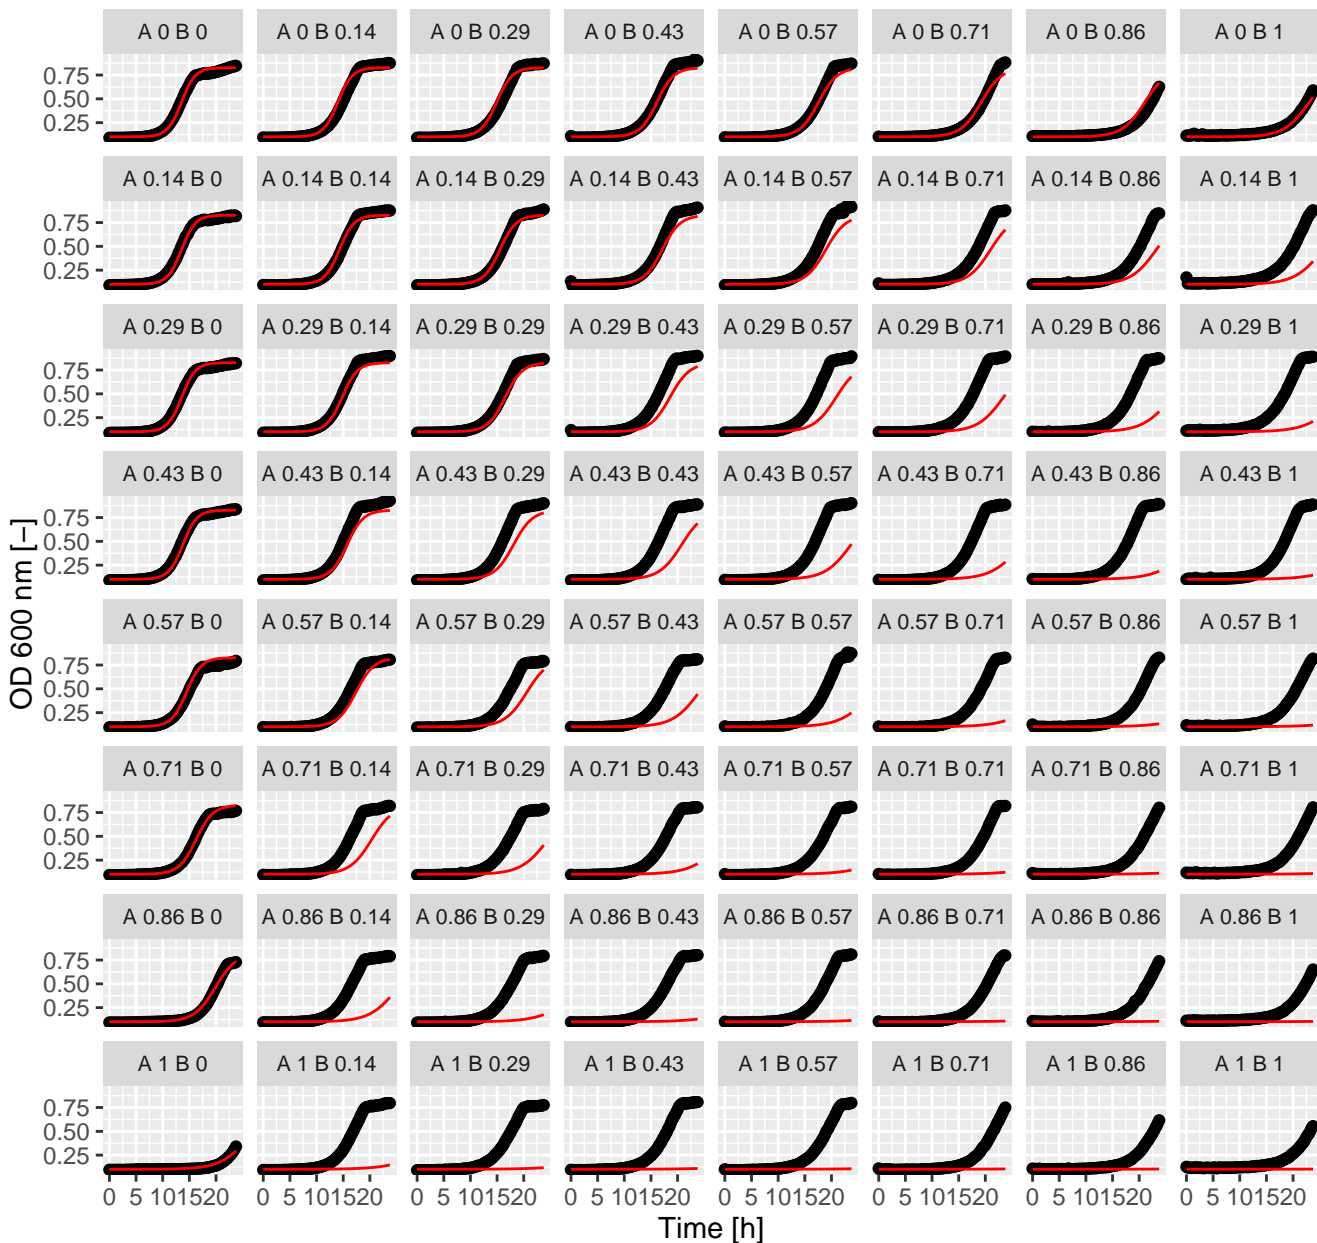

AmB.Tac (= Ax.Bx) full GPDI  
Int\_AB = 1.3 and Int\_BA = 0.88 at EC50

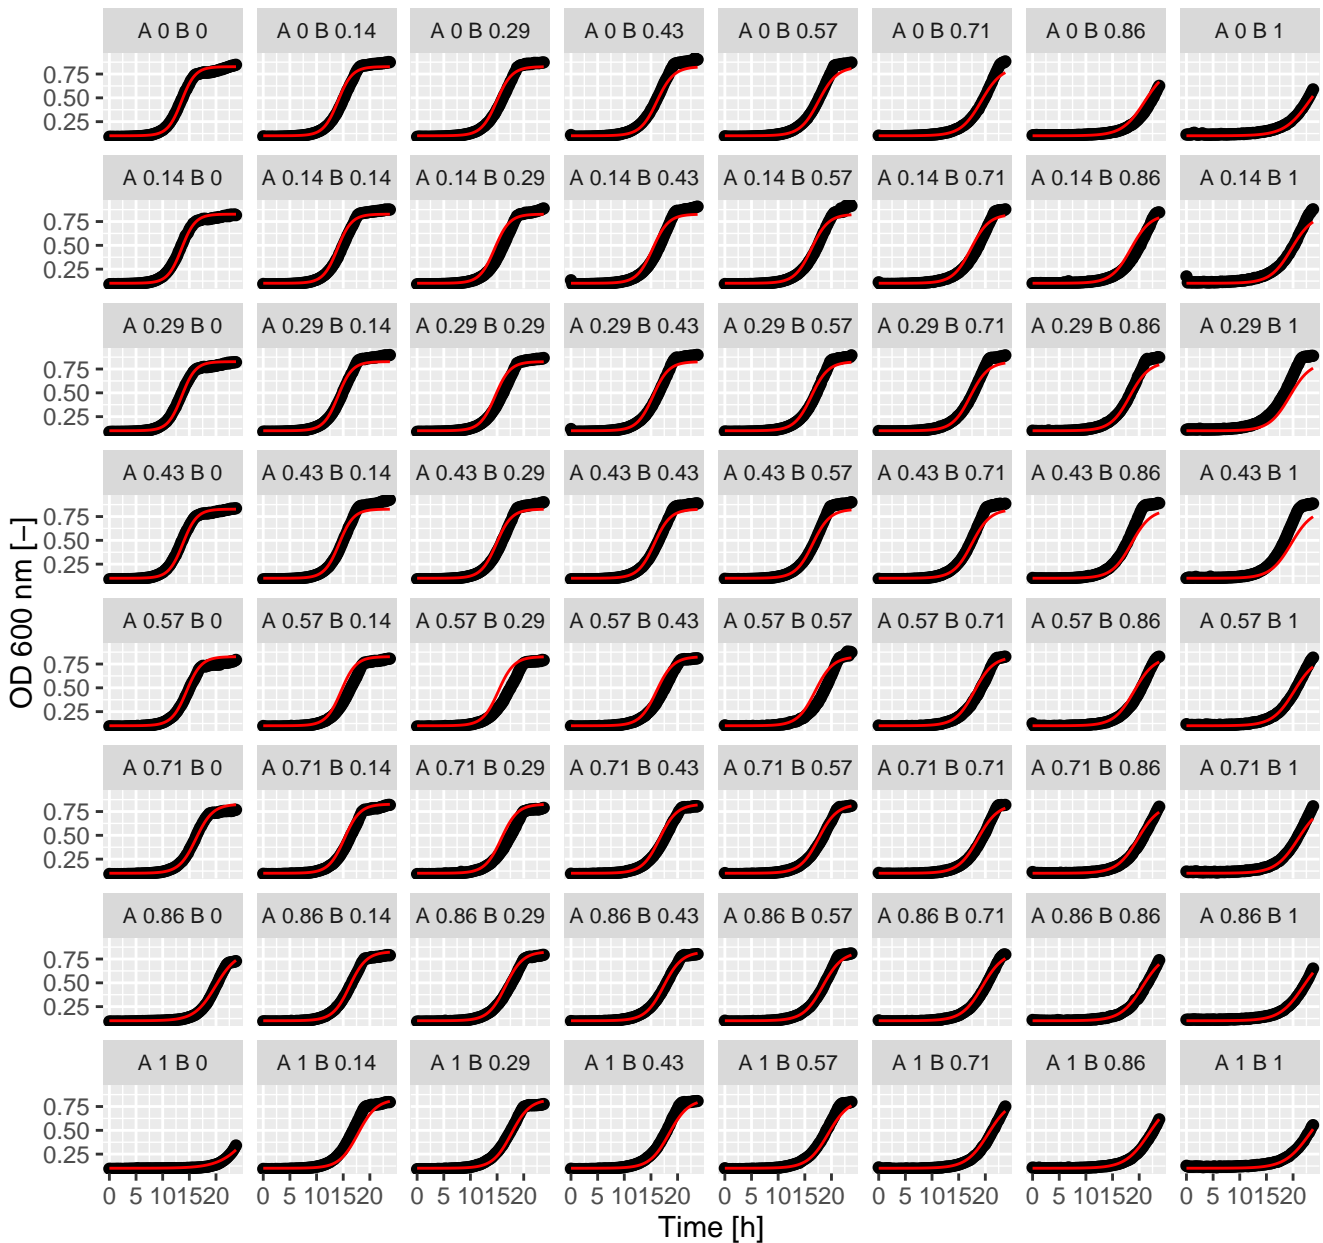

AmB.Ter (= Ax.Bx) exp. additivity (LA)  
Int\_AB = 0 and Int\_BA = 0 at EC50

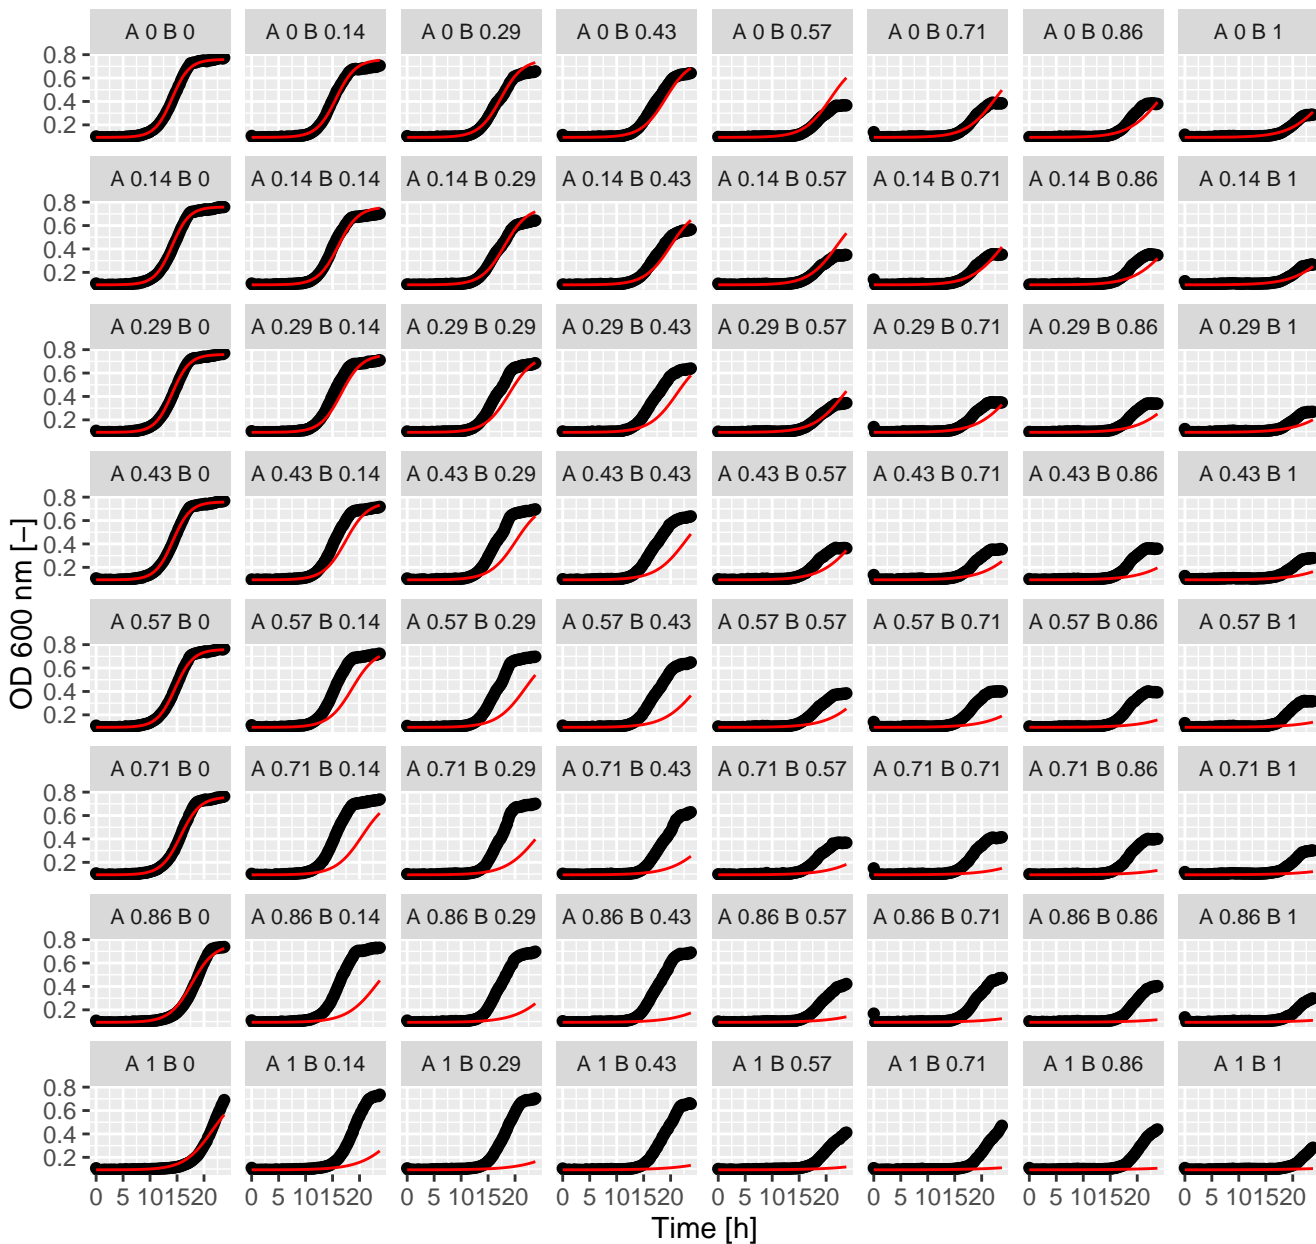

AmB.Ter (= Ax.Bx) full GPDI  
Int\_AB = 3.32 and Int\_BA = 0.3 at EC50

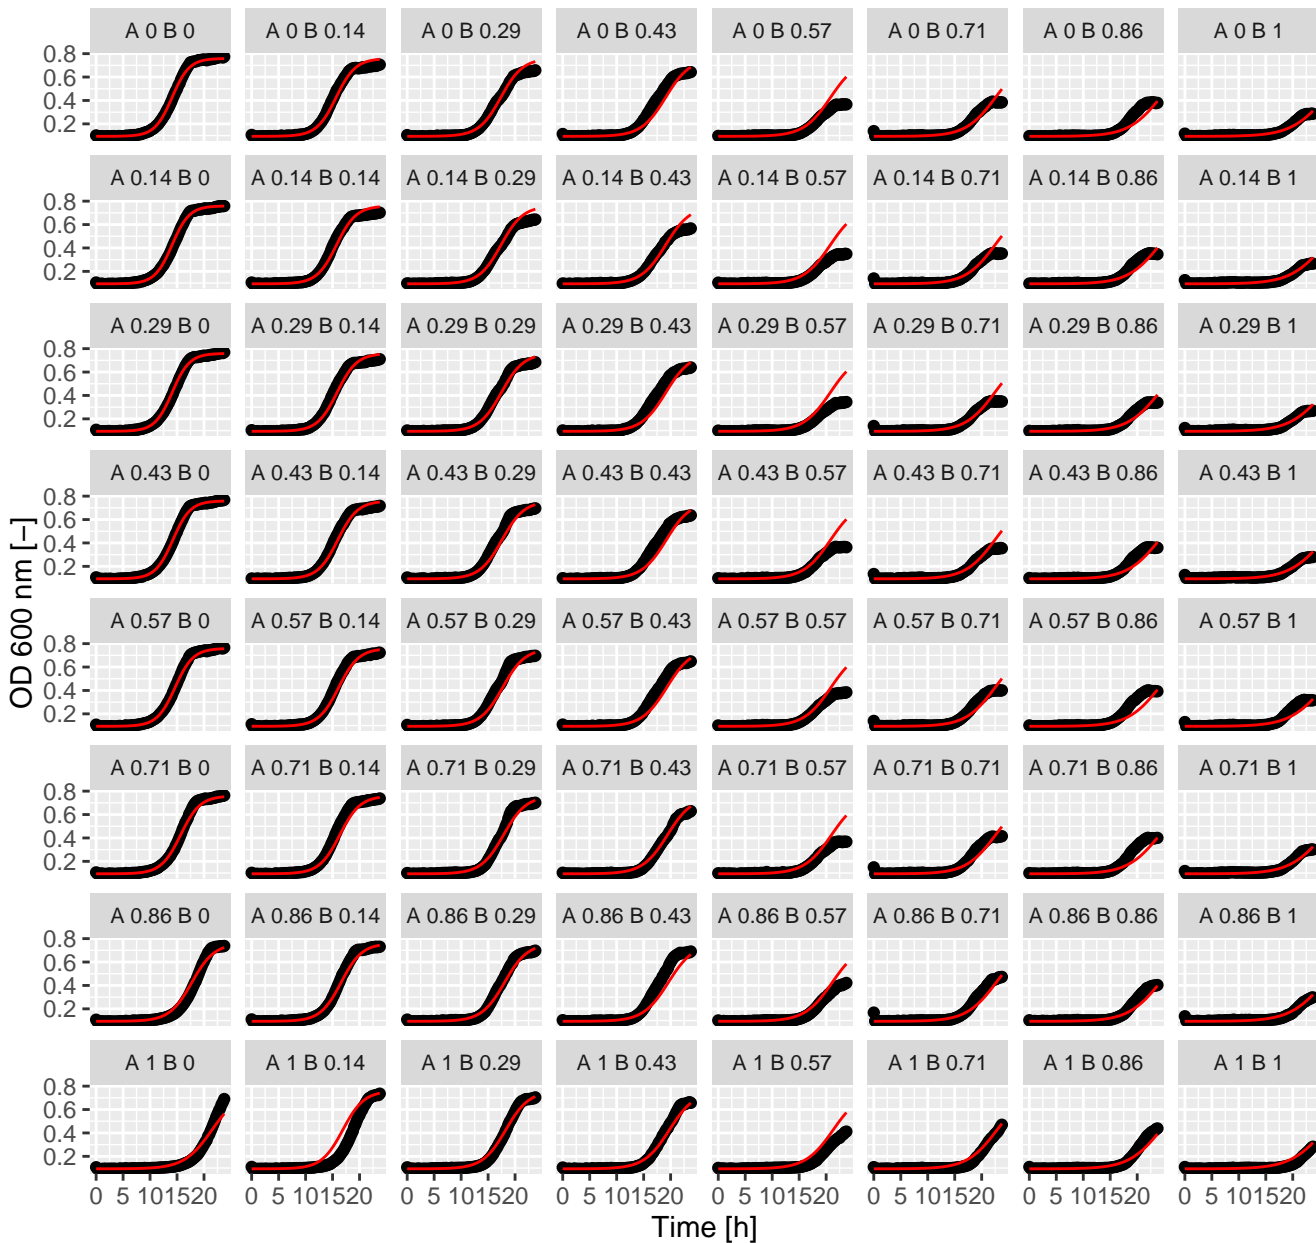



Ani.Ani (= Ax.Bx) exp. additivity (LA)  
Int\_AB = 0 and Int\_BA = 0 at EC50

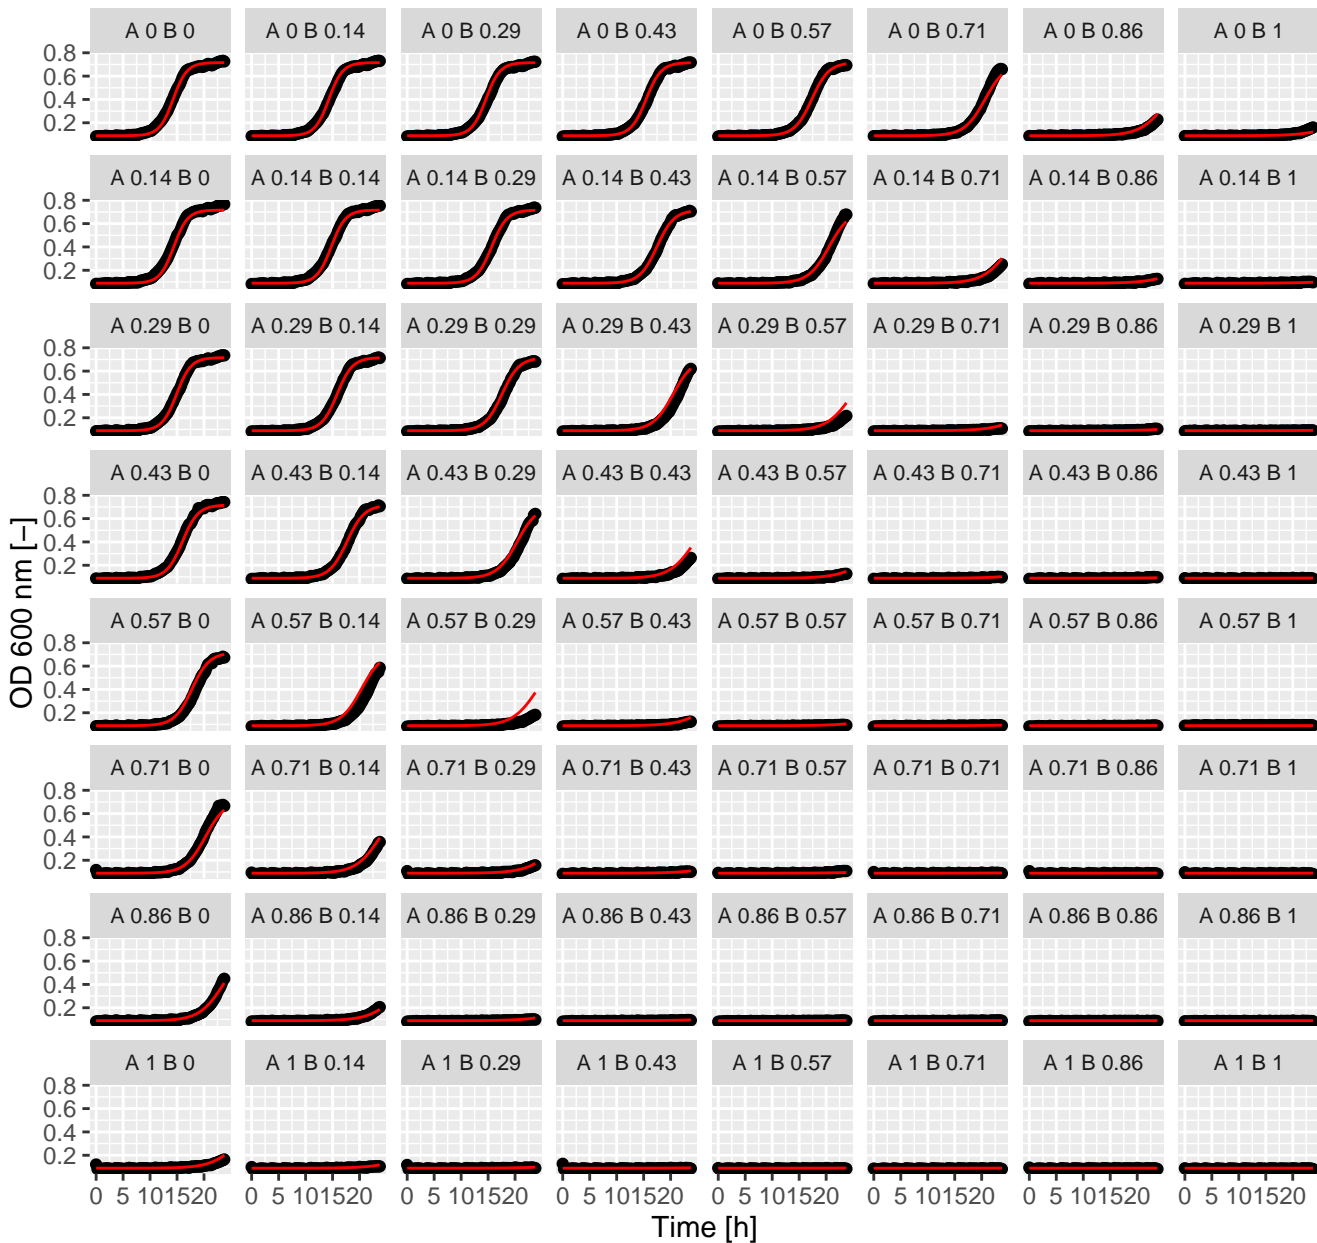

Ani.Ani (= Ax.Bx) full GPD1  
Int\_AB = 0 and Int\_BA = -0.22 at EC50

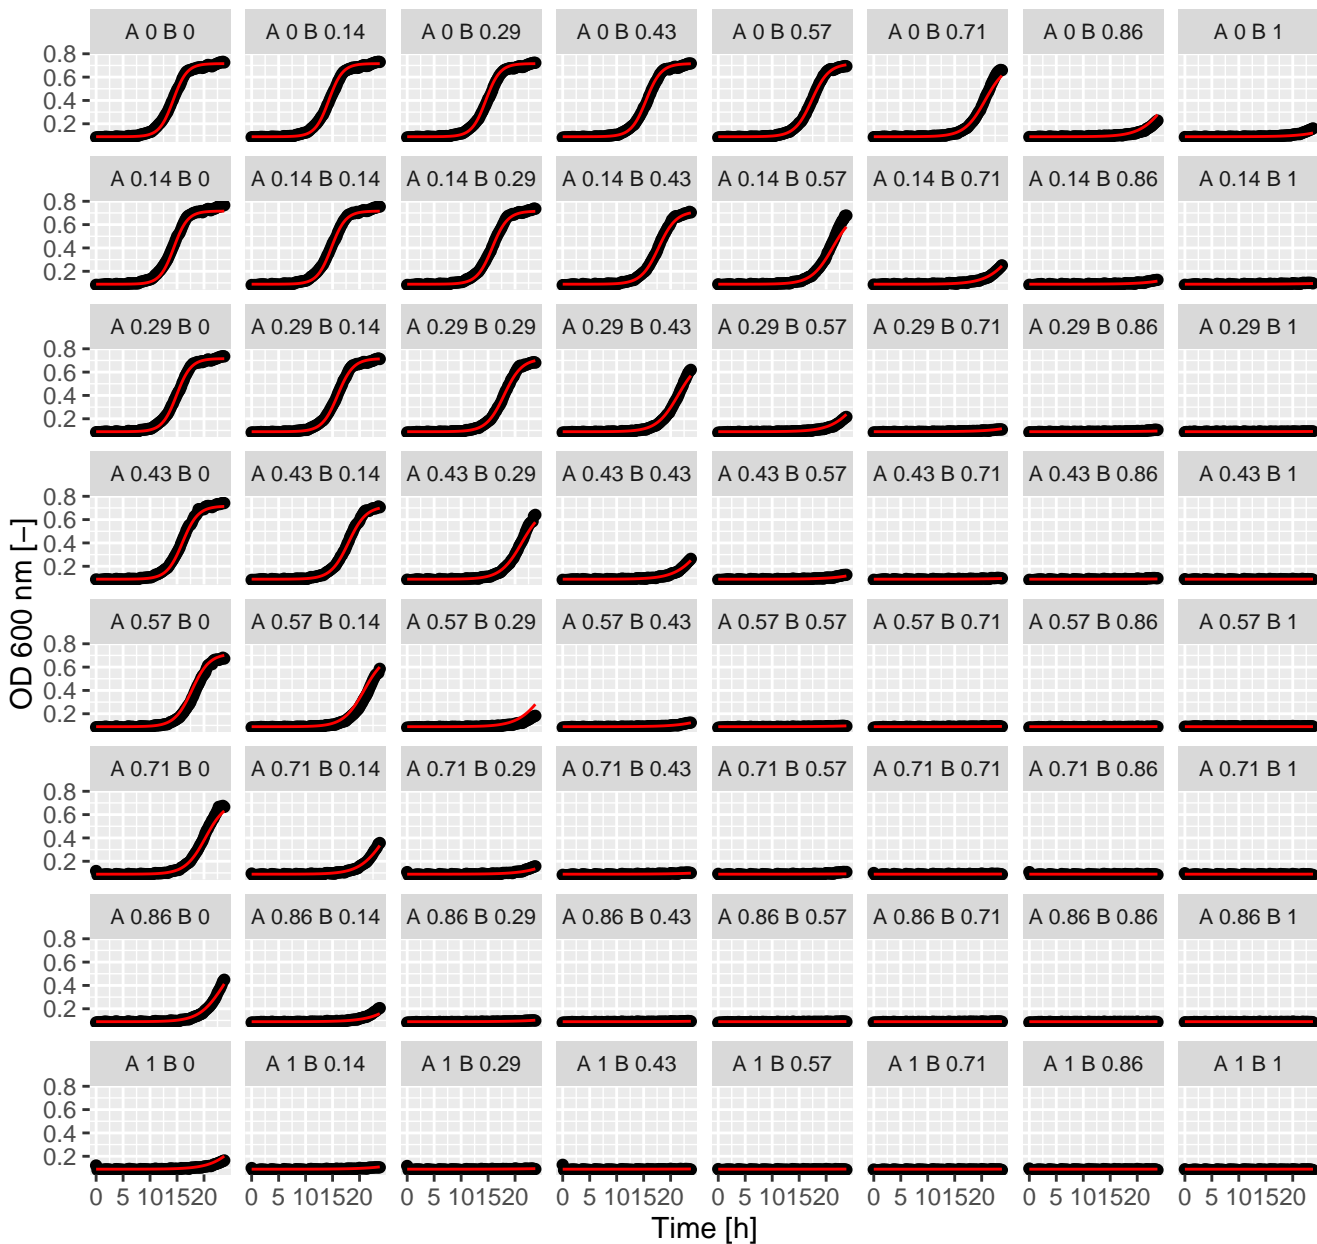

Ani.Ben (= Ax.Bx) exp. additivity (LA)  
Int\_AB = 0 and Int\_BA = 0 at EC50

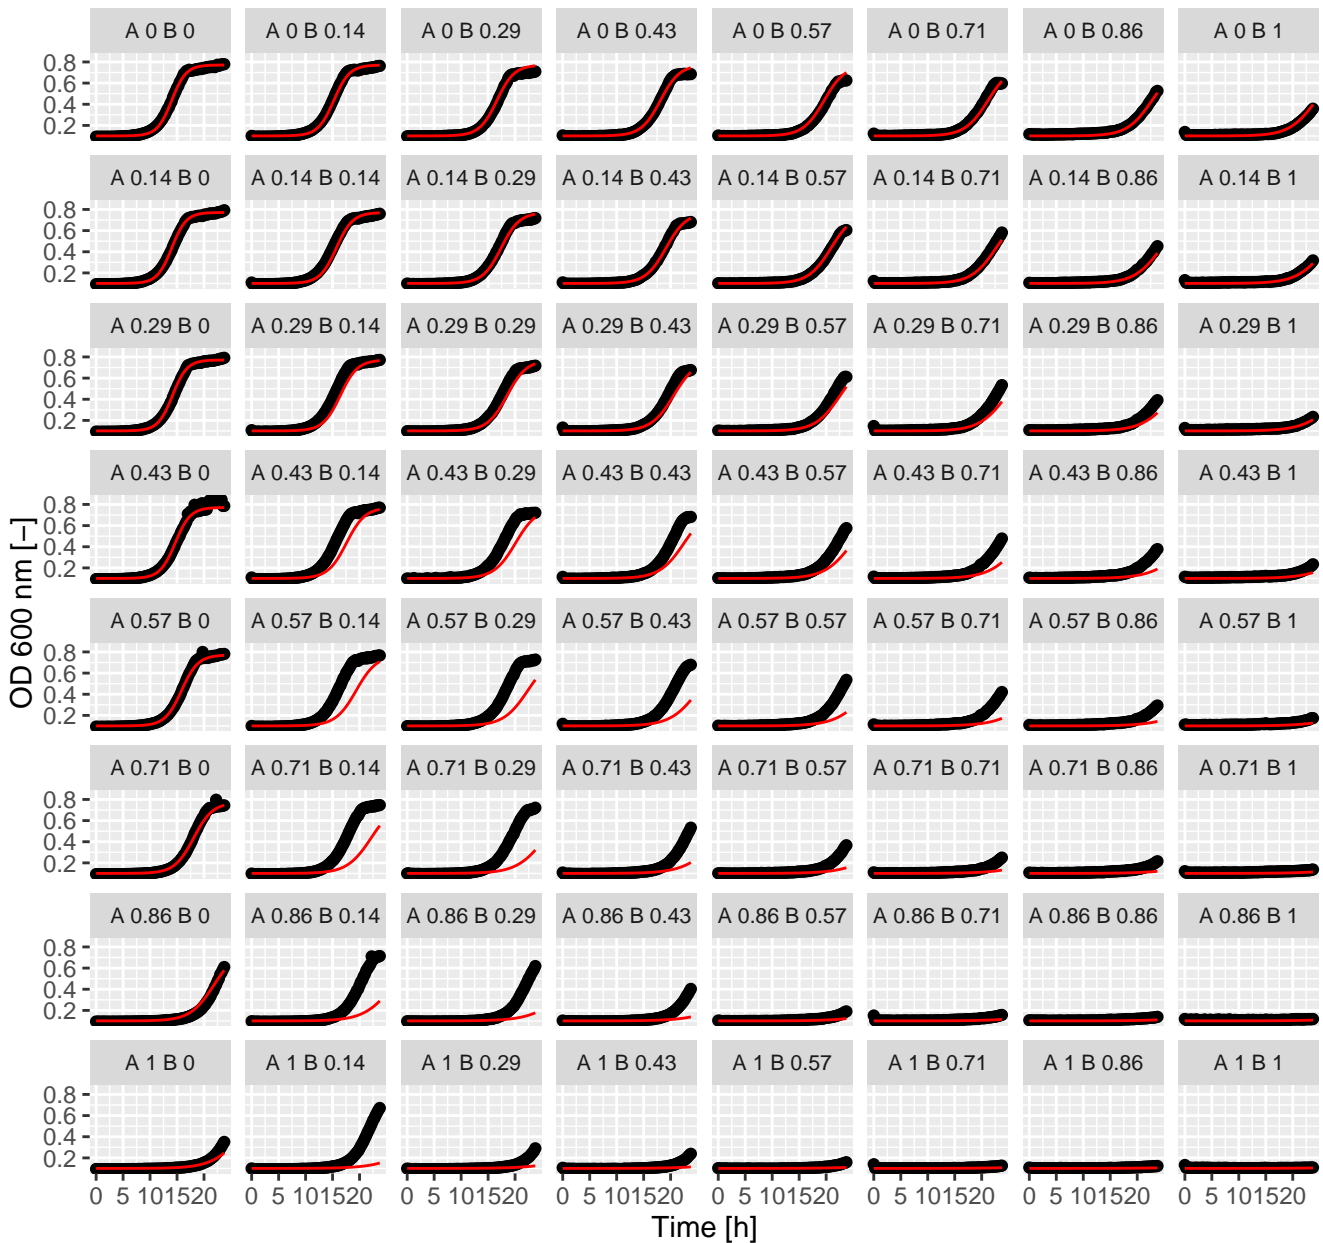

Ani.Ben (= Ax.Bx) full GPDI  
Int\_AB = 0.4 and Int\_BA = 0.23 at EC50

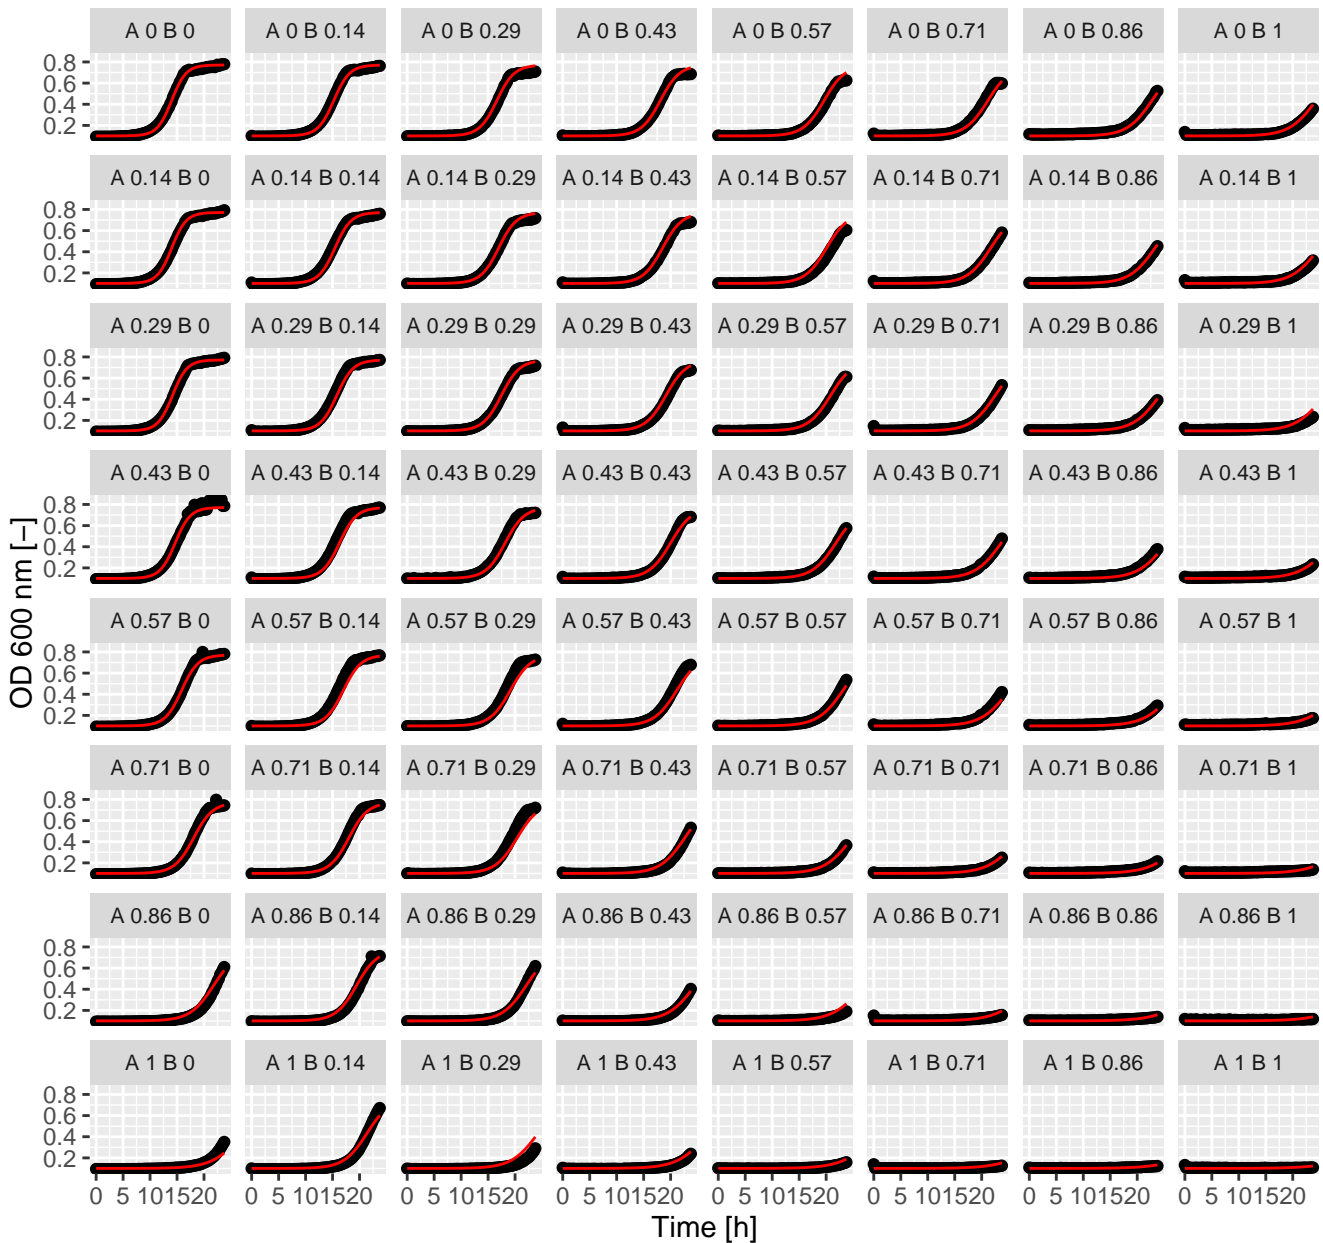

Ani.Lat (= Ax.Bx) exp. additivity (LA)  
Int\_AB = 0 and Int\_BA = 0 at EC50

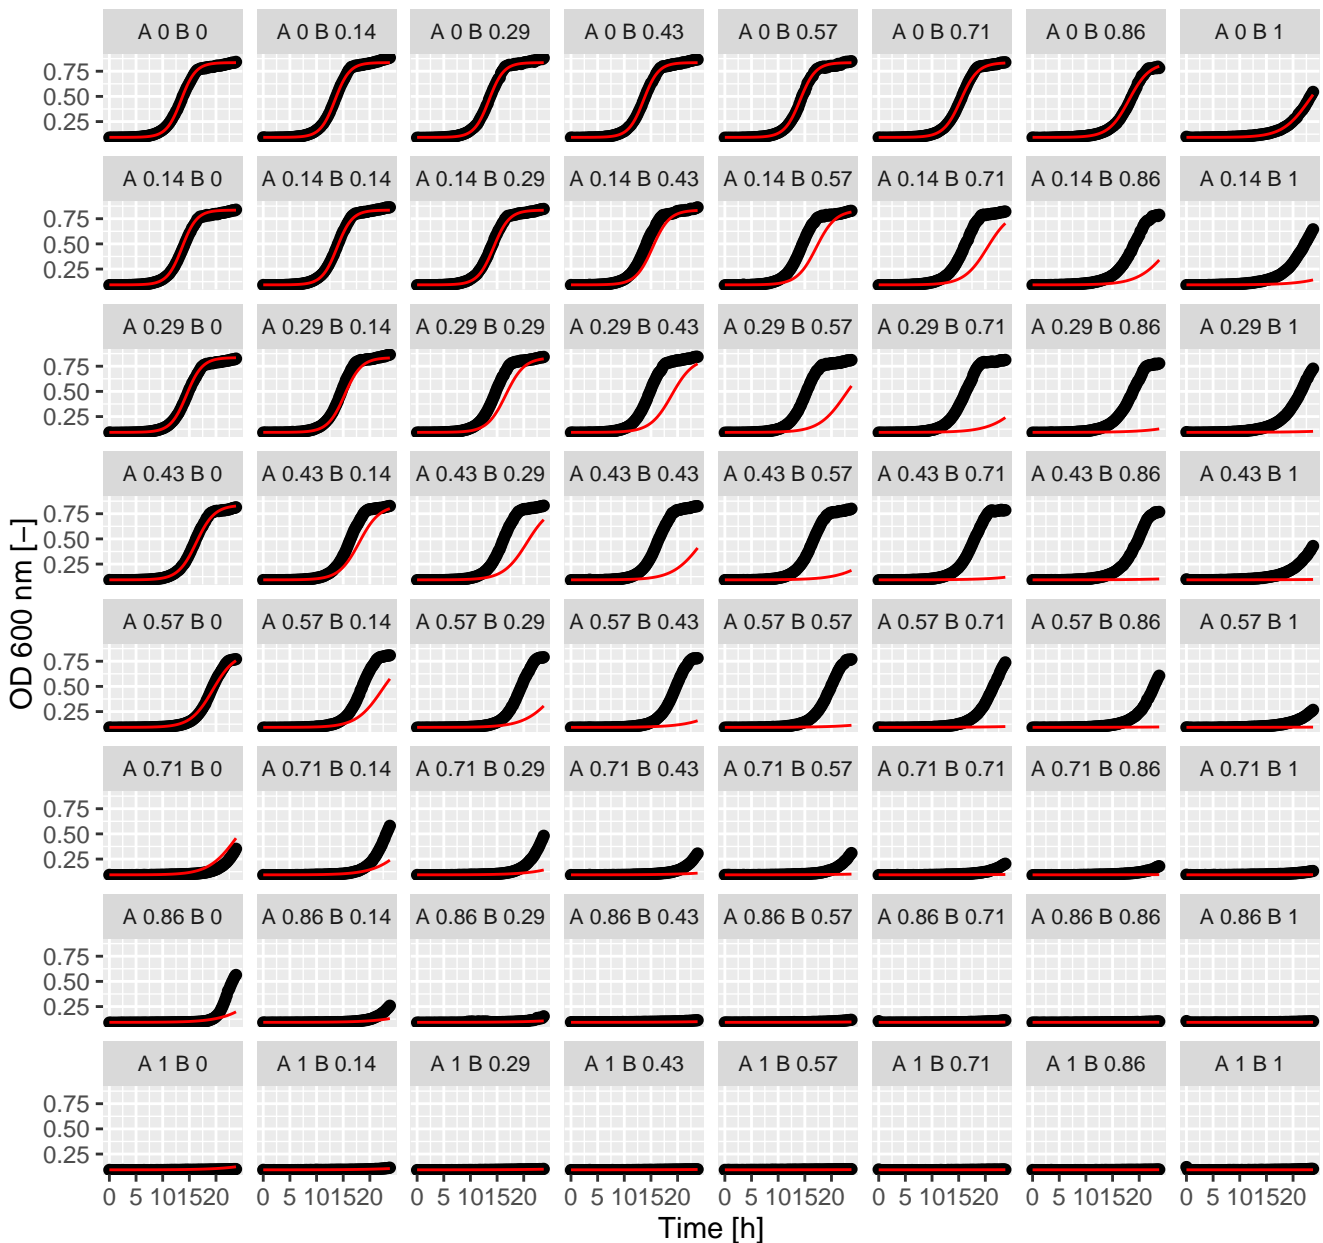

Ani.Lat (= Ax.Bx) full GPDI  
Int\_AB = 0.74 and Int\_BA = 0.76 at EC50

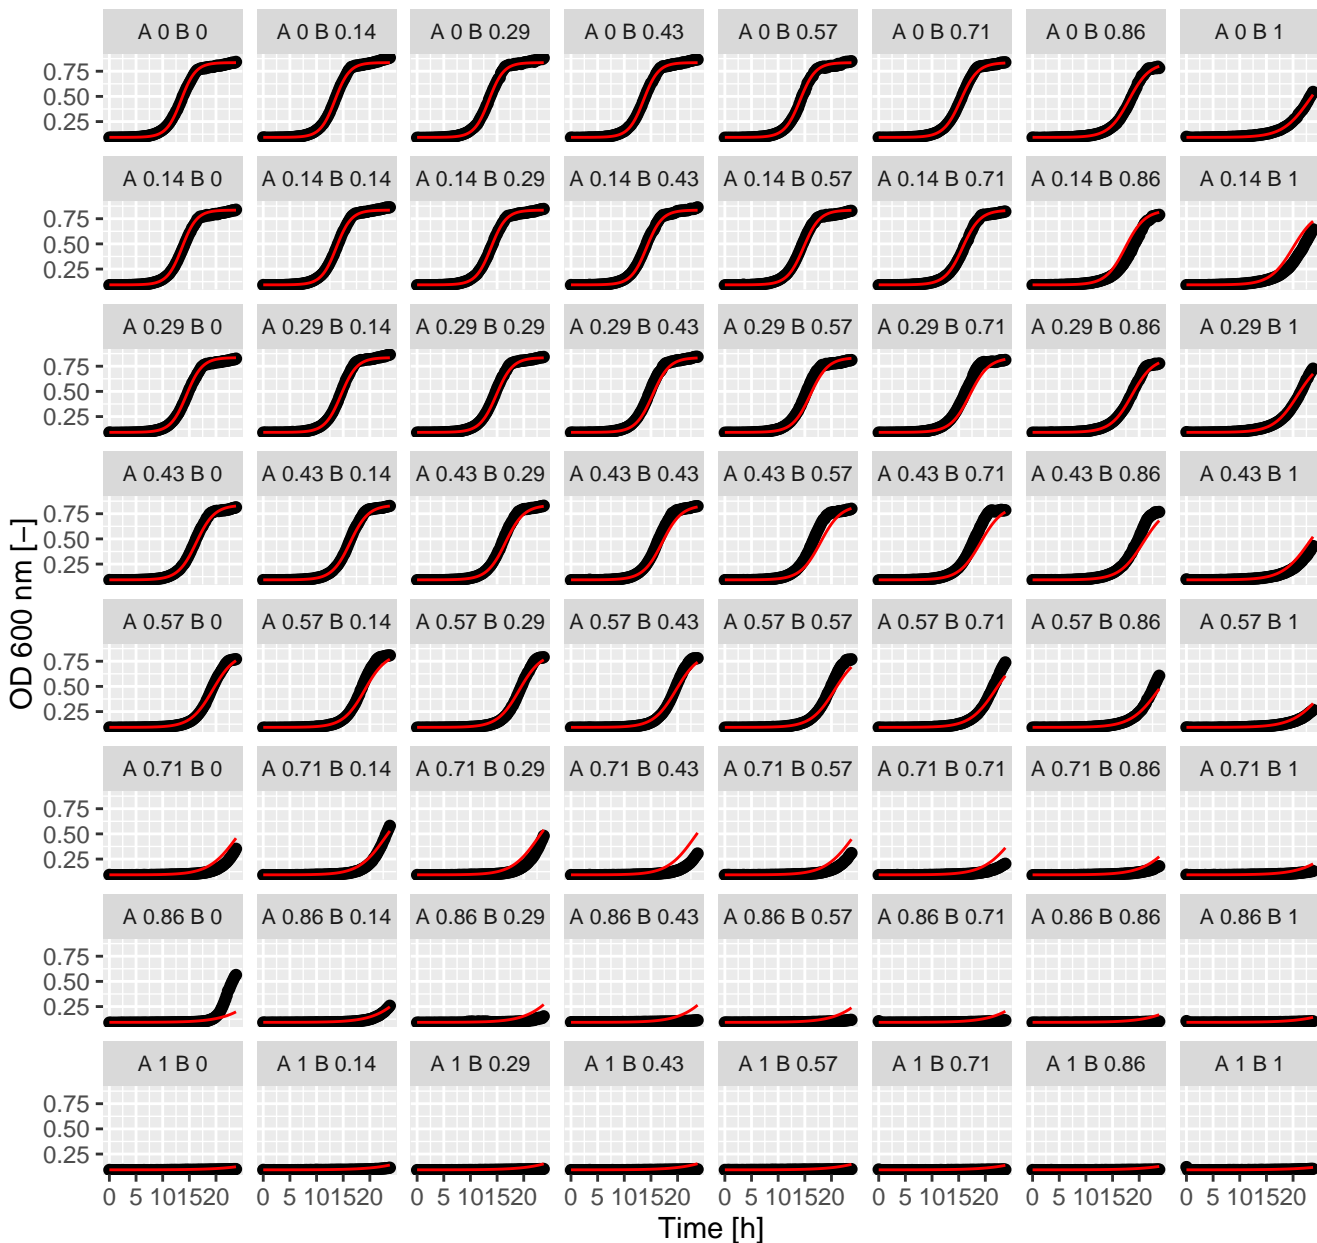

Ani.Pen (= Ax.Bx) exp. additivity (LA)  
Int\_AB = 0 and Int\_BA = 0 at EC50

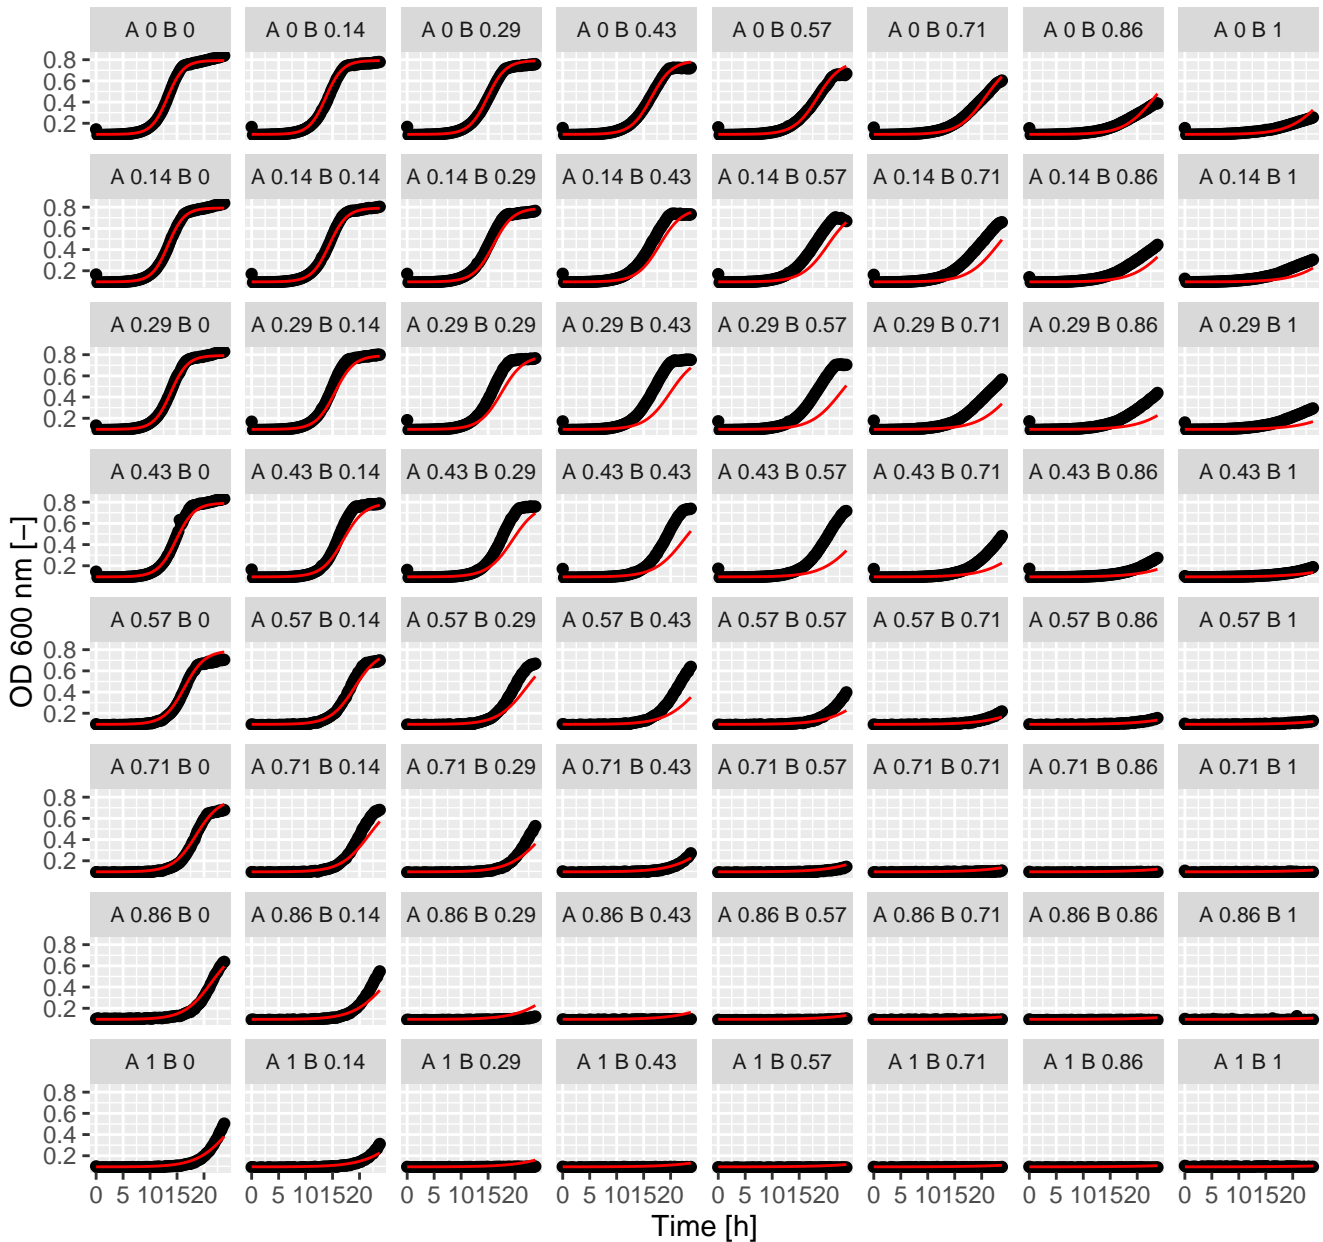

Ani.Pen (= Ax.Bx) full GPDI  
Int\_AB = -0.39 and Int\_BA = 3.34 at EC50

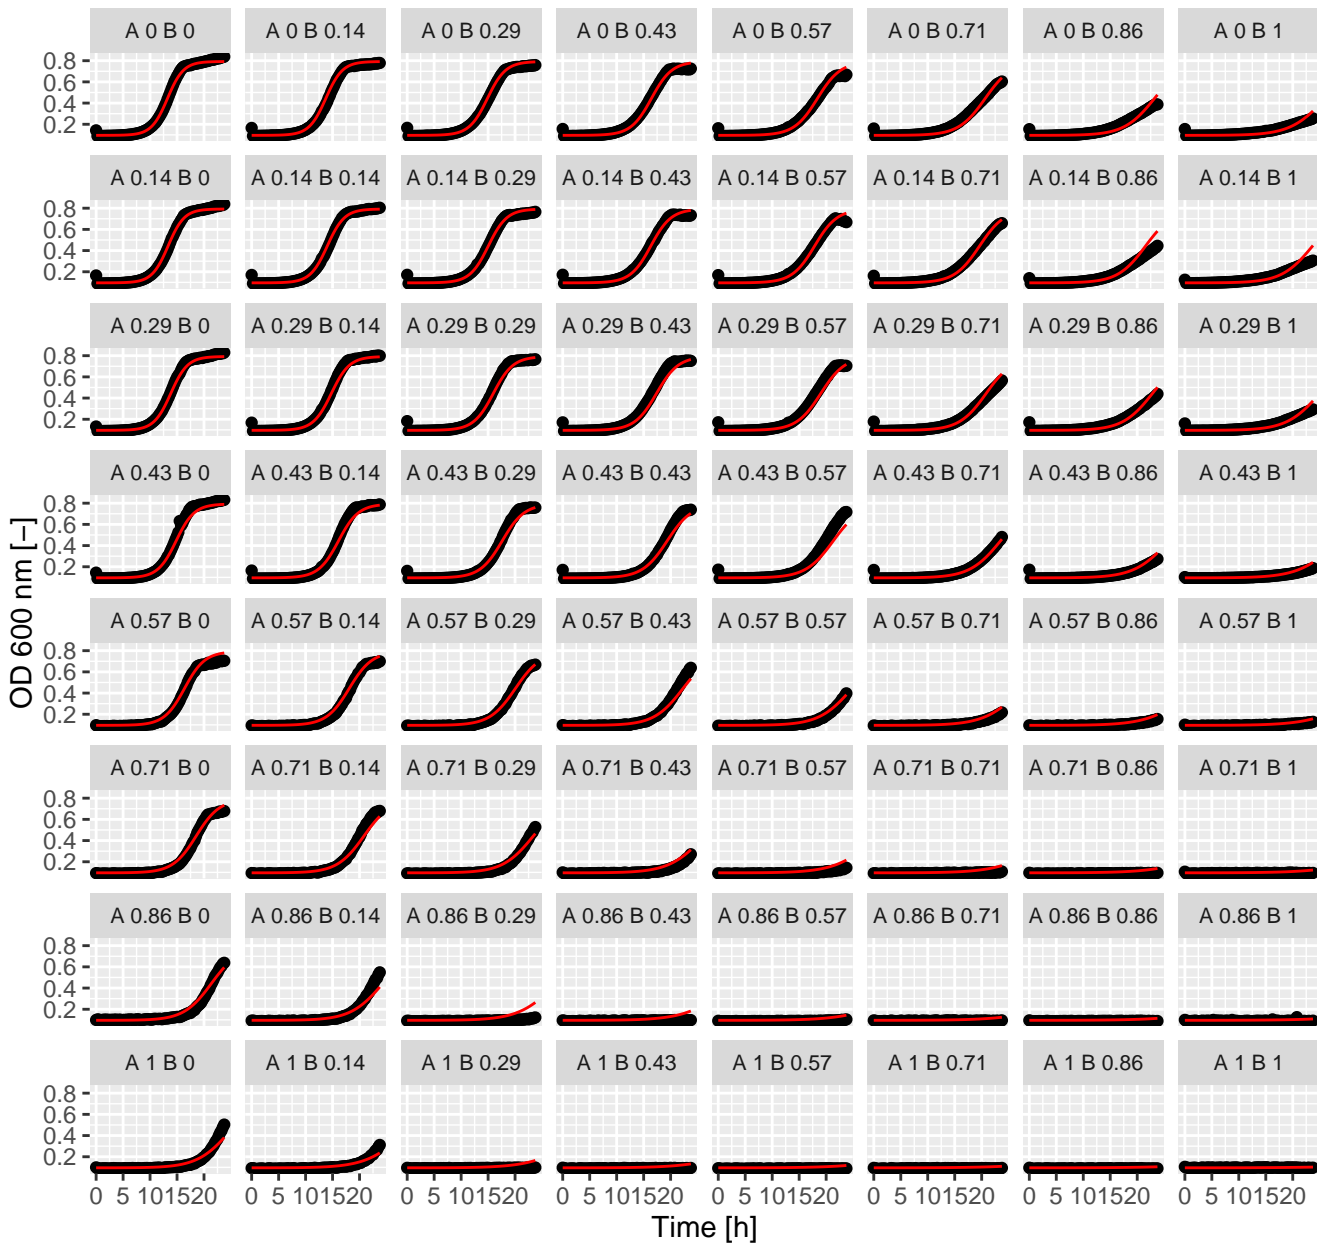



Ani.Sta (= Ax.Bx) exp. additivity (LA)  
Int\_AB = 0 and Int\_BA = 0 at EC50

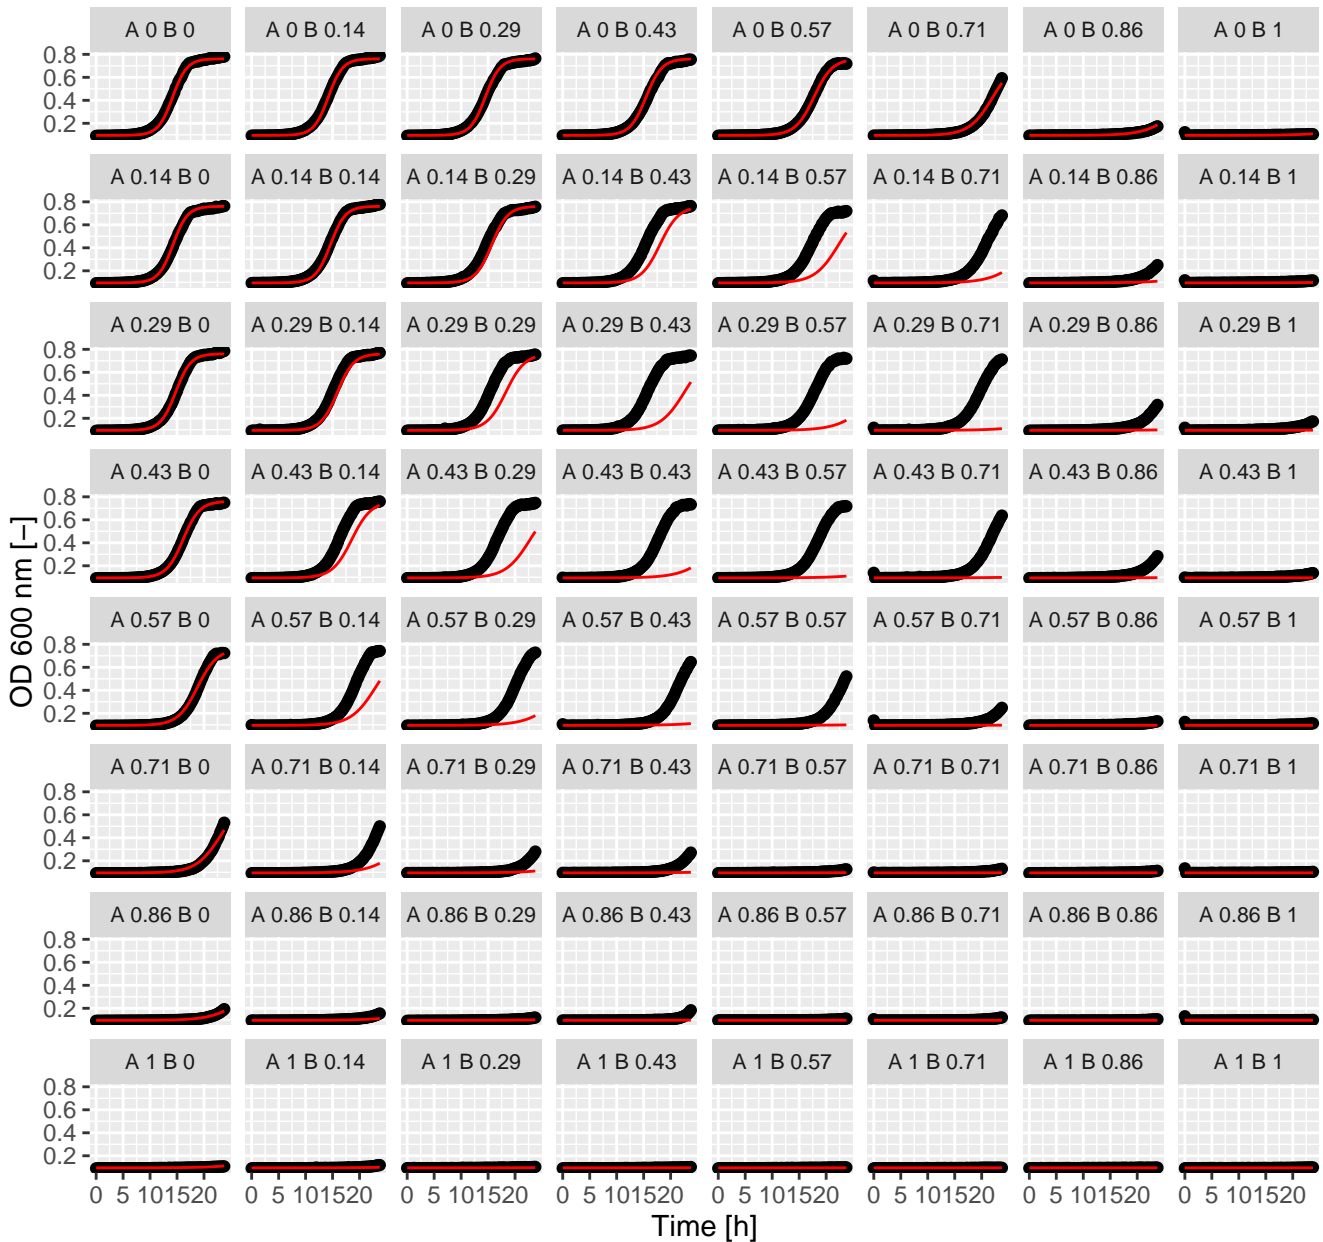

Ani.Sta (= Ax.Bx) full GPDI  
Int\_AB = 0.31 and Int\_BA = 1.42 at EC50

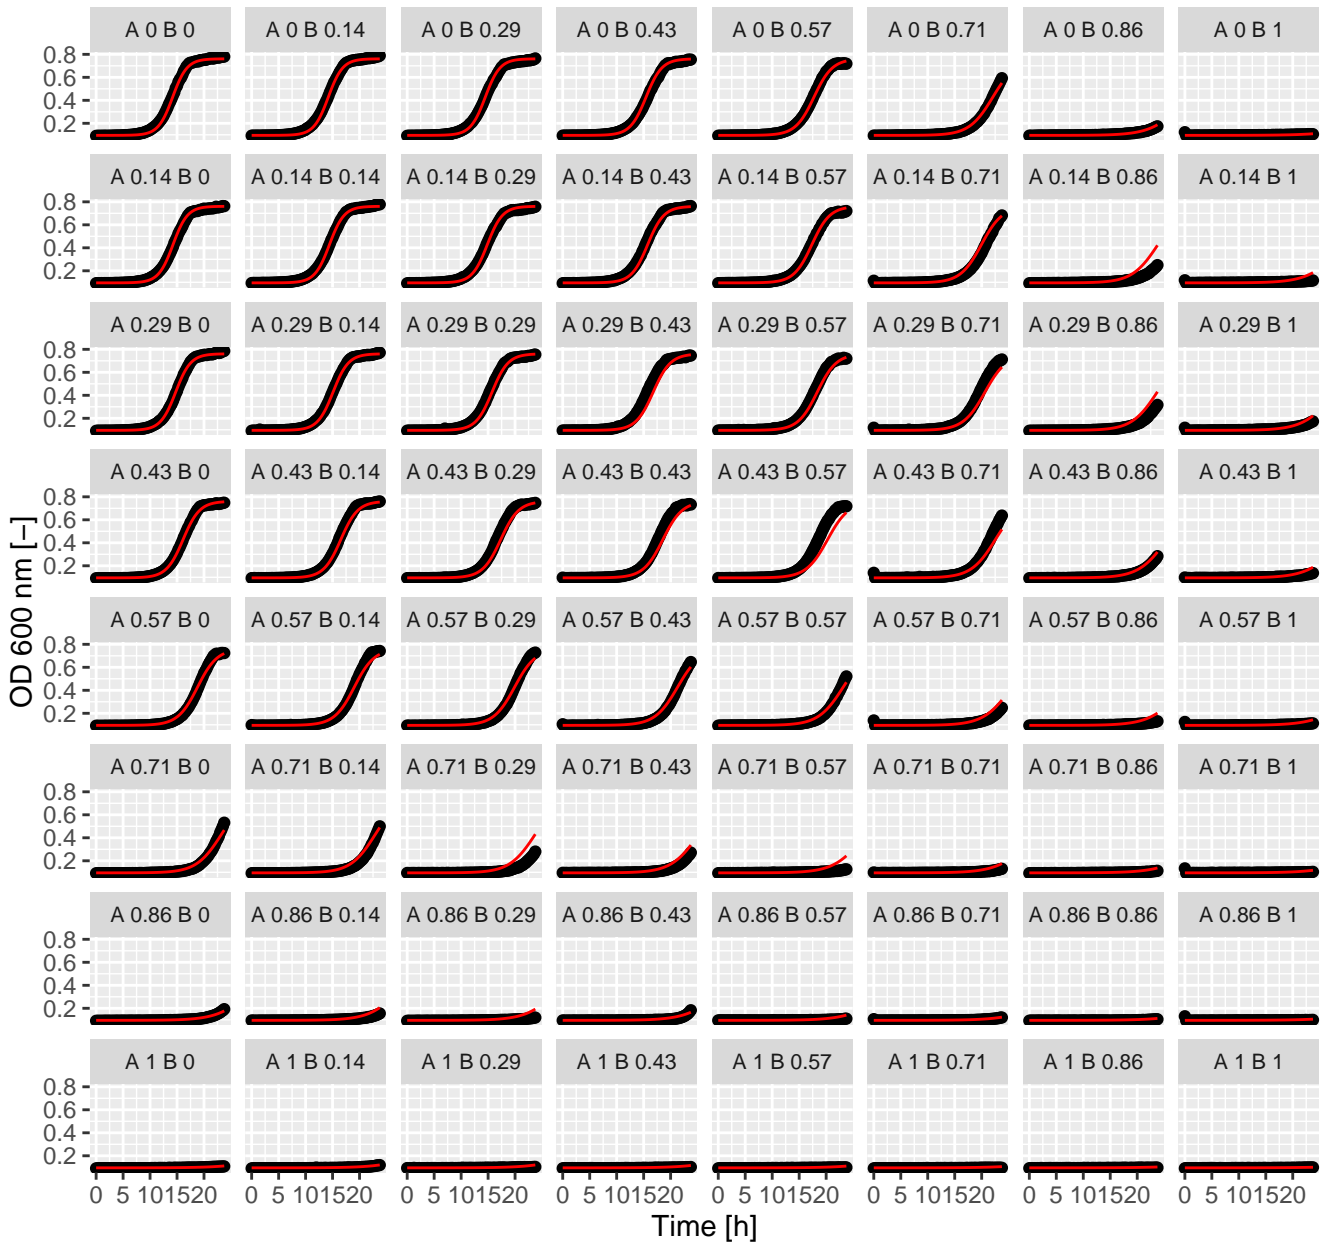

Ani.Tac (= Ax.Bx) exp. additivity (LA)  
Int\_AB = 0 and Int\_BA = 0 at EC50

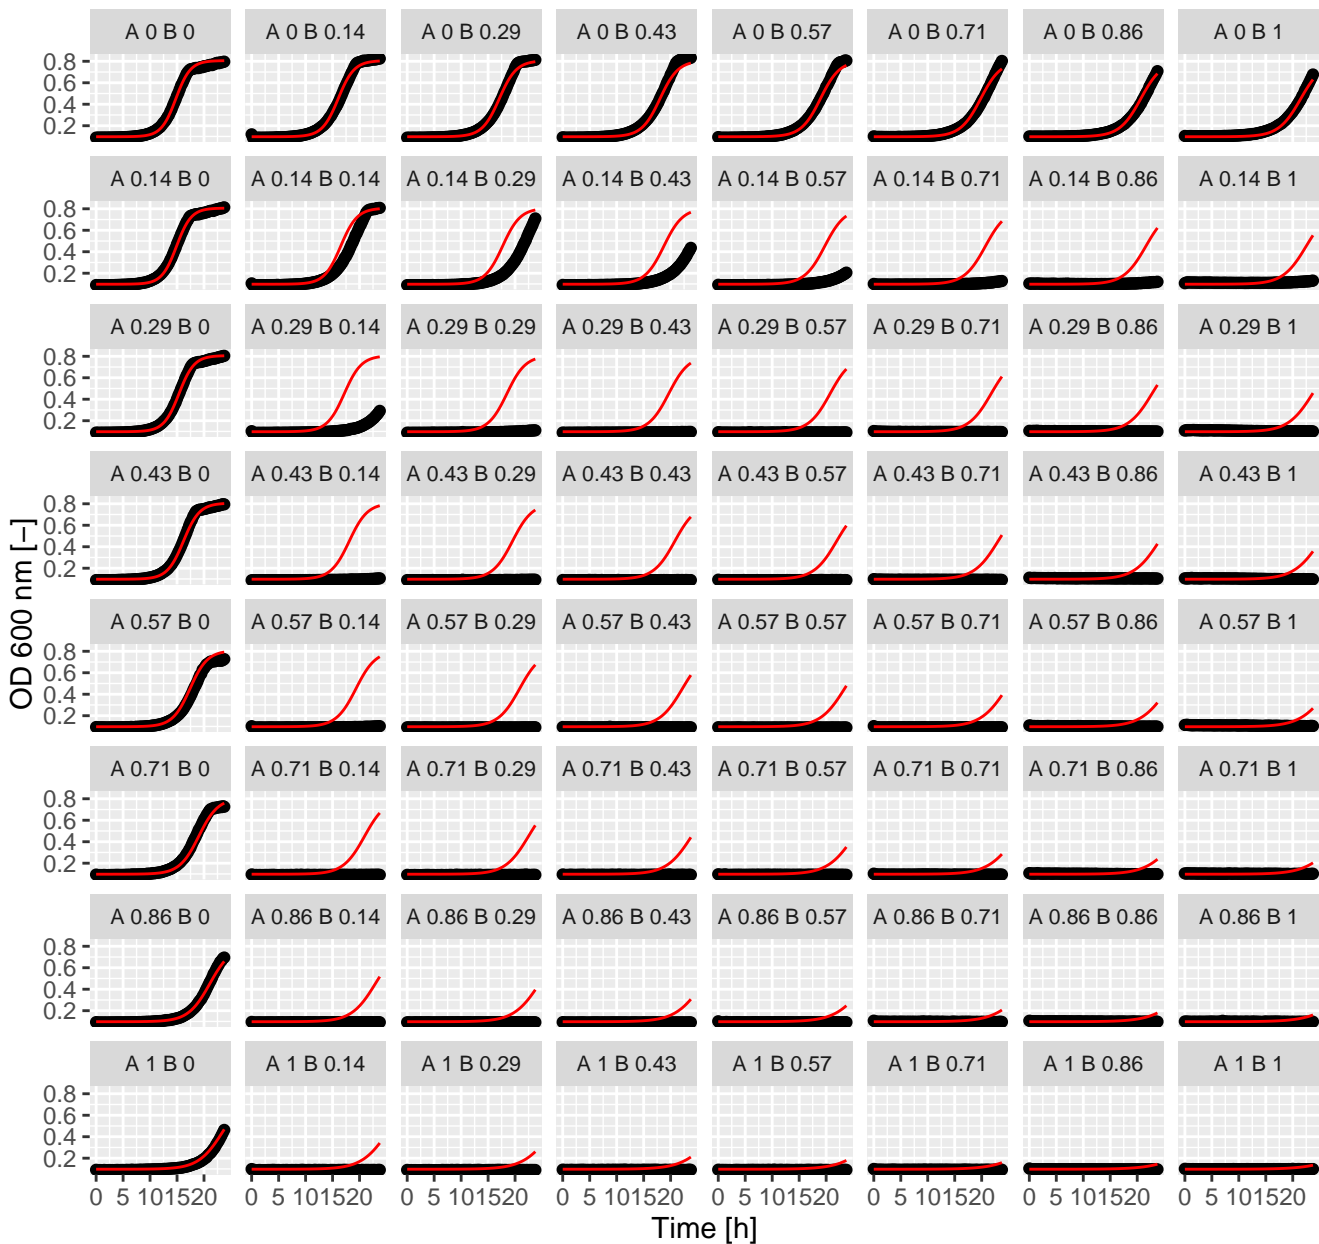

Ani.Tac (= Ax.Bx) full GPDI  
Int\_AB = -0.91 and Int\_BA = 2.19 at EC50

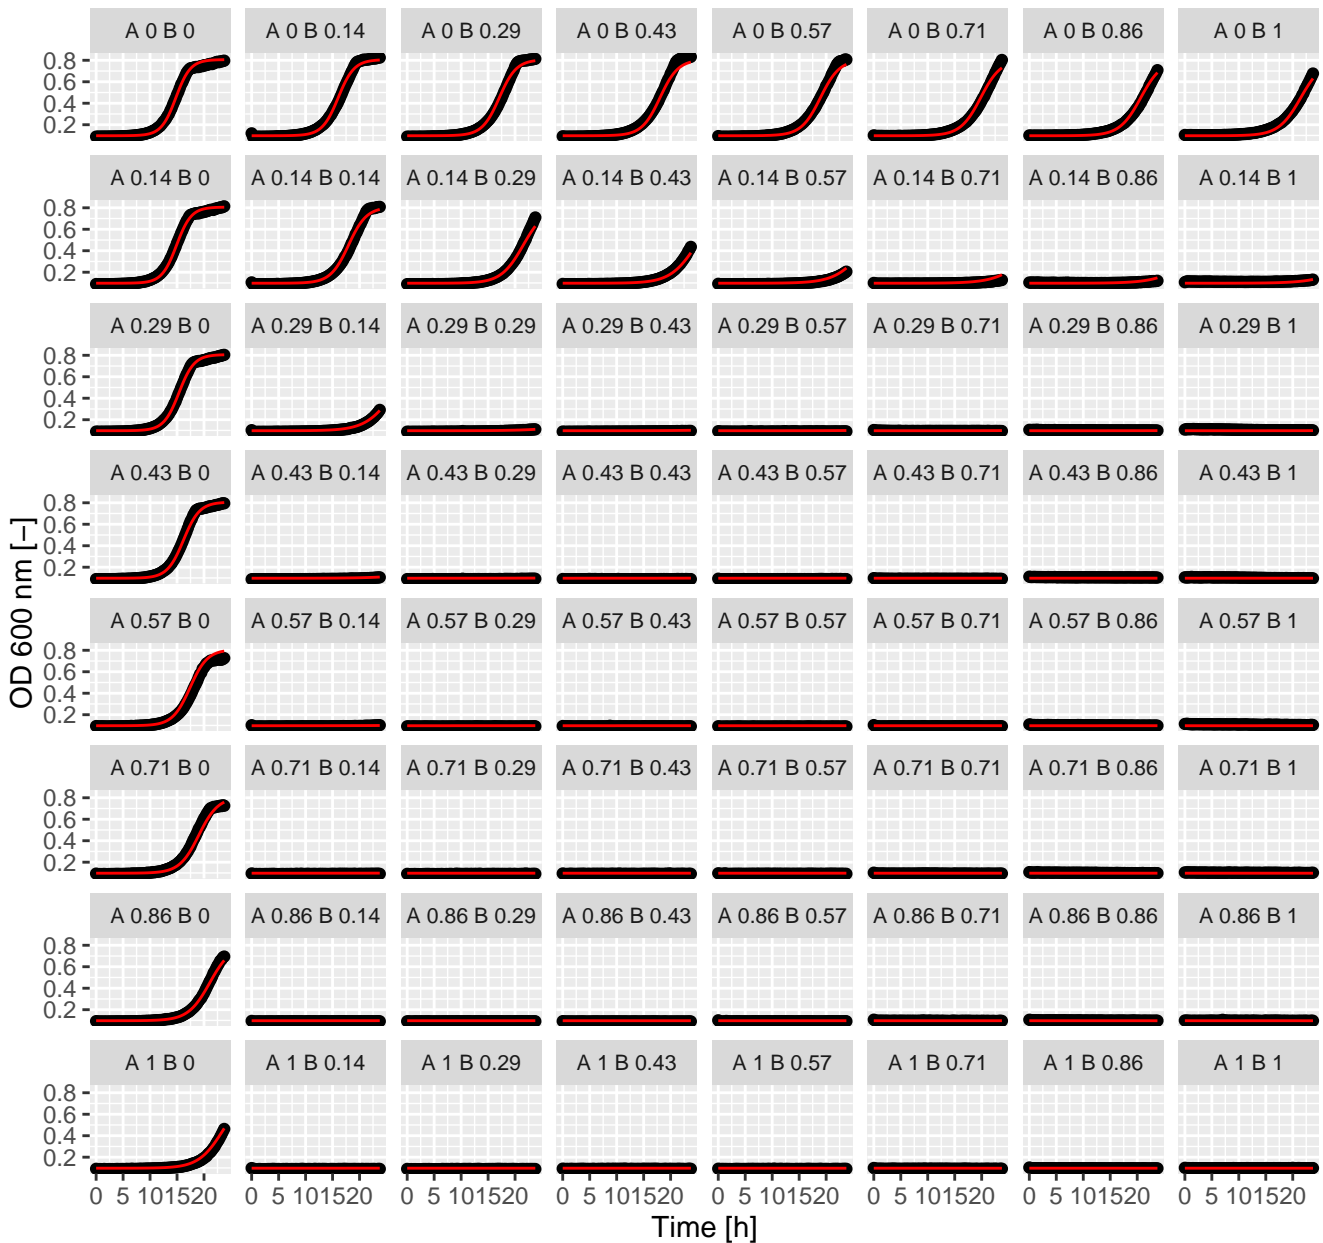

Ani.Ter (= Ax.Bx) exp. additivity (LA)  
Int\_AB = 0 and Int\_BA = 0 at EC50

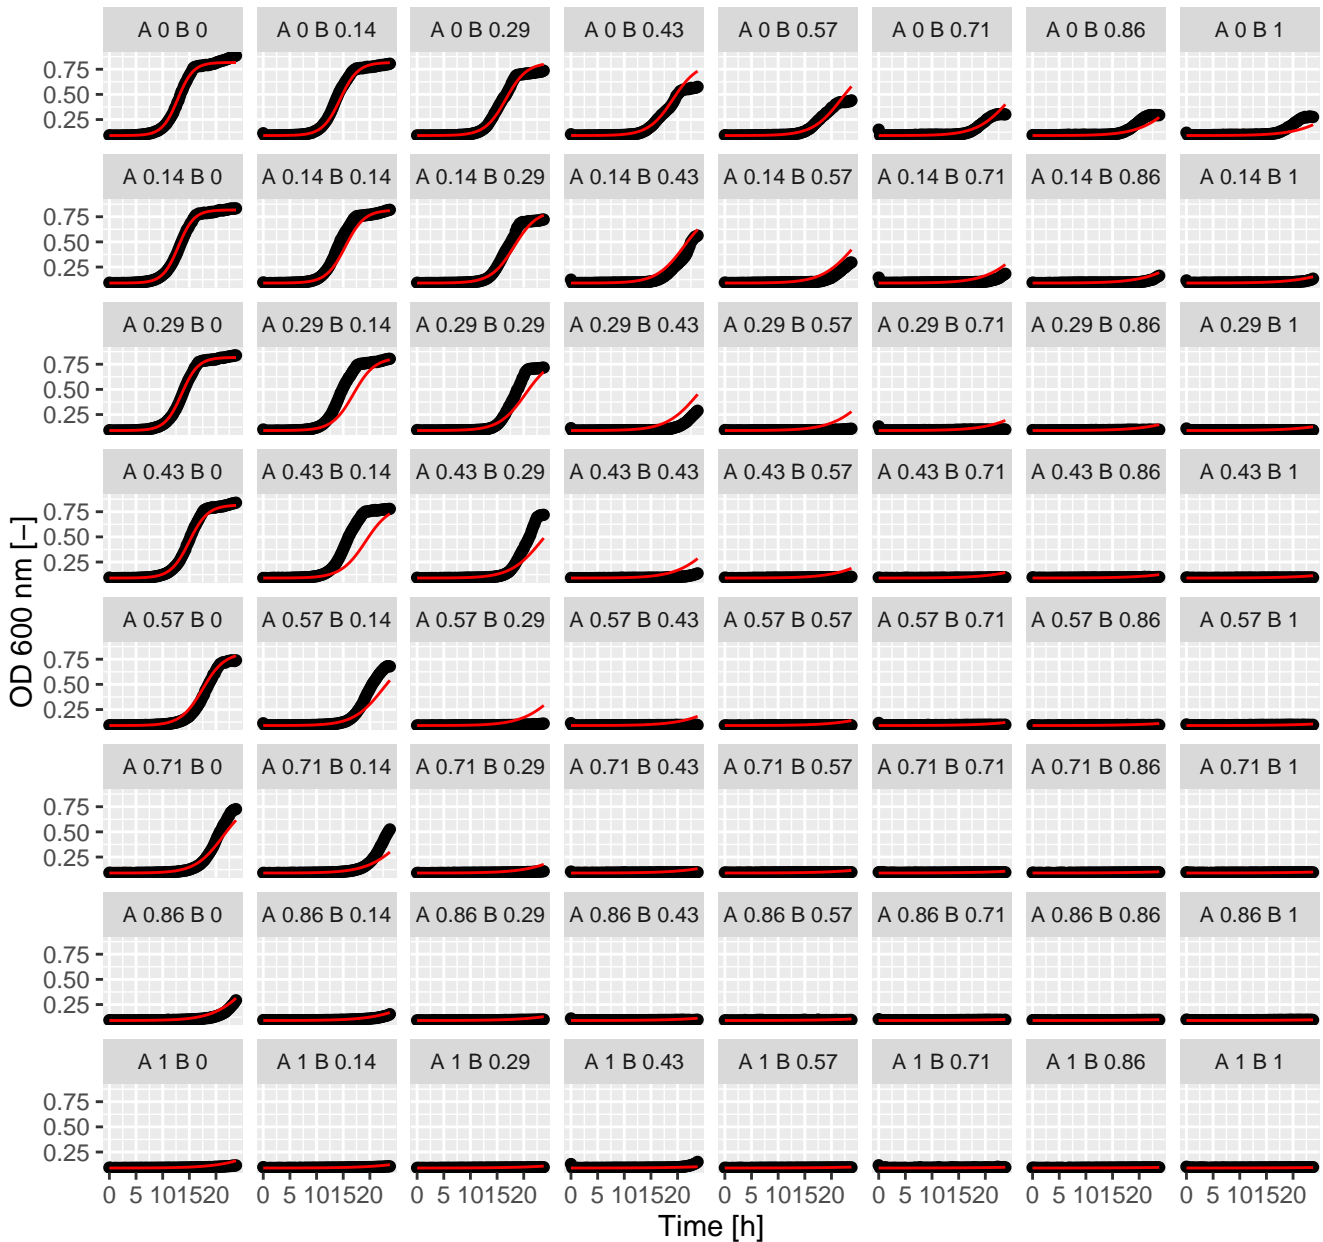

Ani.Ter (= Ax.Bx) full GPDI  
Int\_AB = 0.45 and Int\_BA = -0.39 at EC50

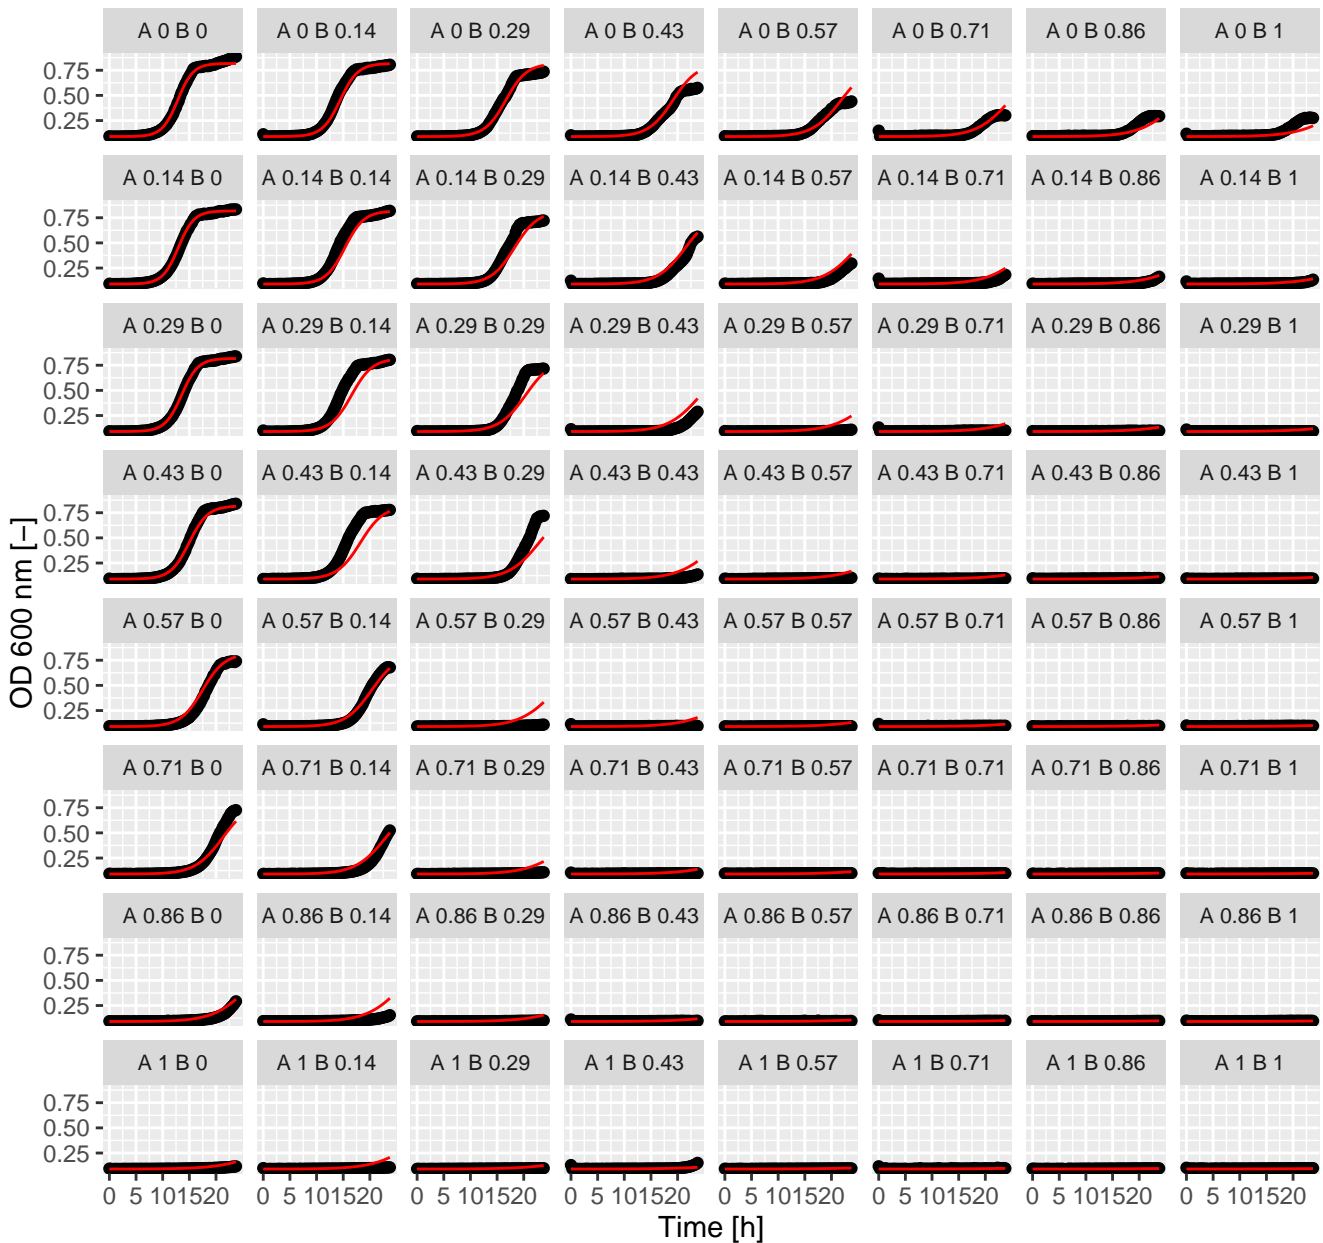

Ben.Ben (= Ax.Bx) exp. additivity (LA)  
Int\_AB = 0 and Int\_BA = 0 at EC50

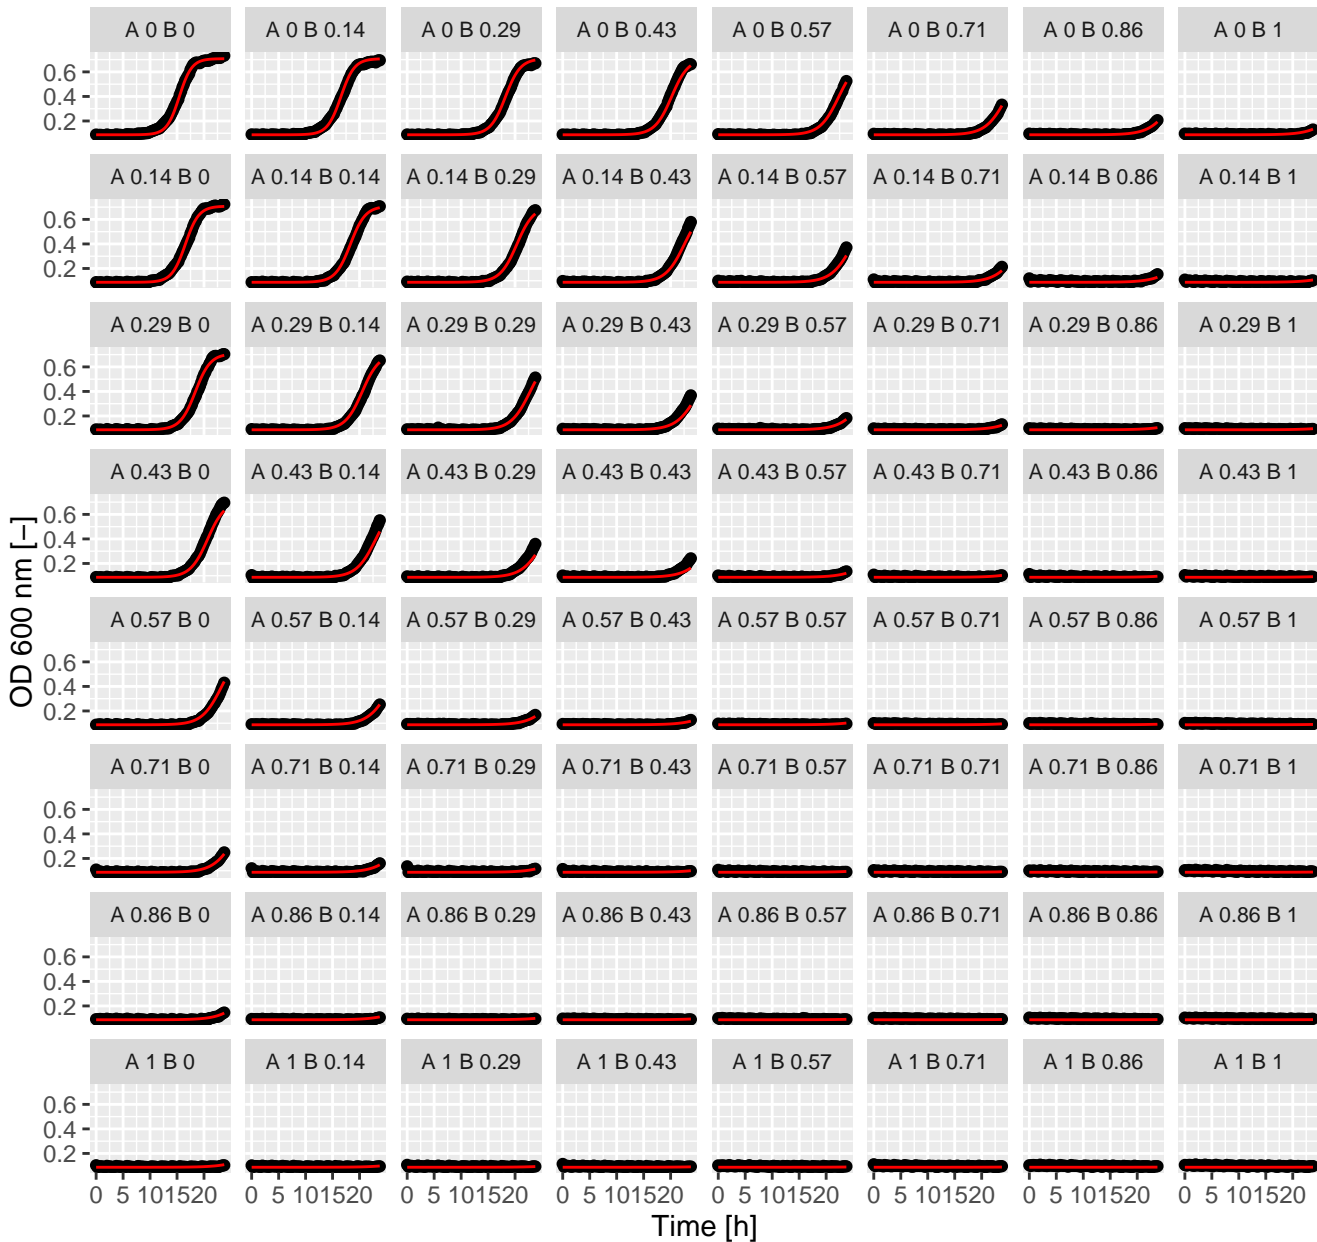

Ben.Ben (= Ax.Bx) full GPDI  
Int\_AB = 0.1 and Int\_BA = 0.16 at EC50

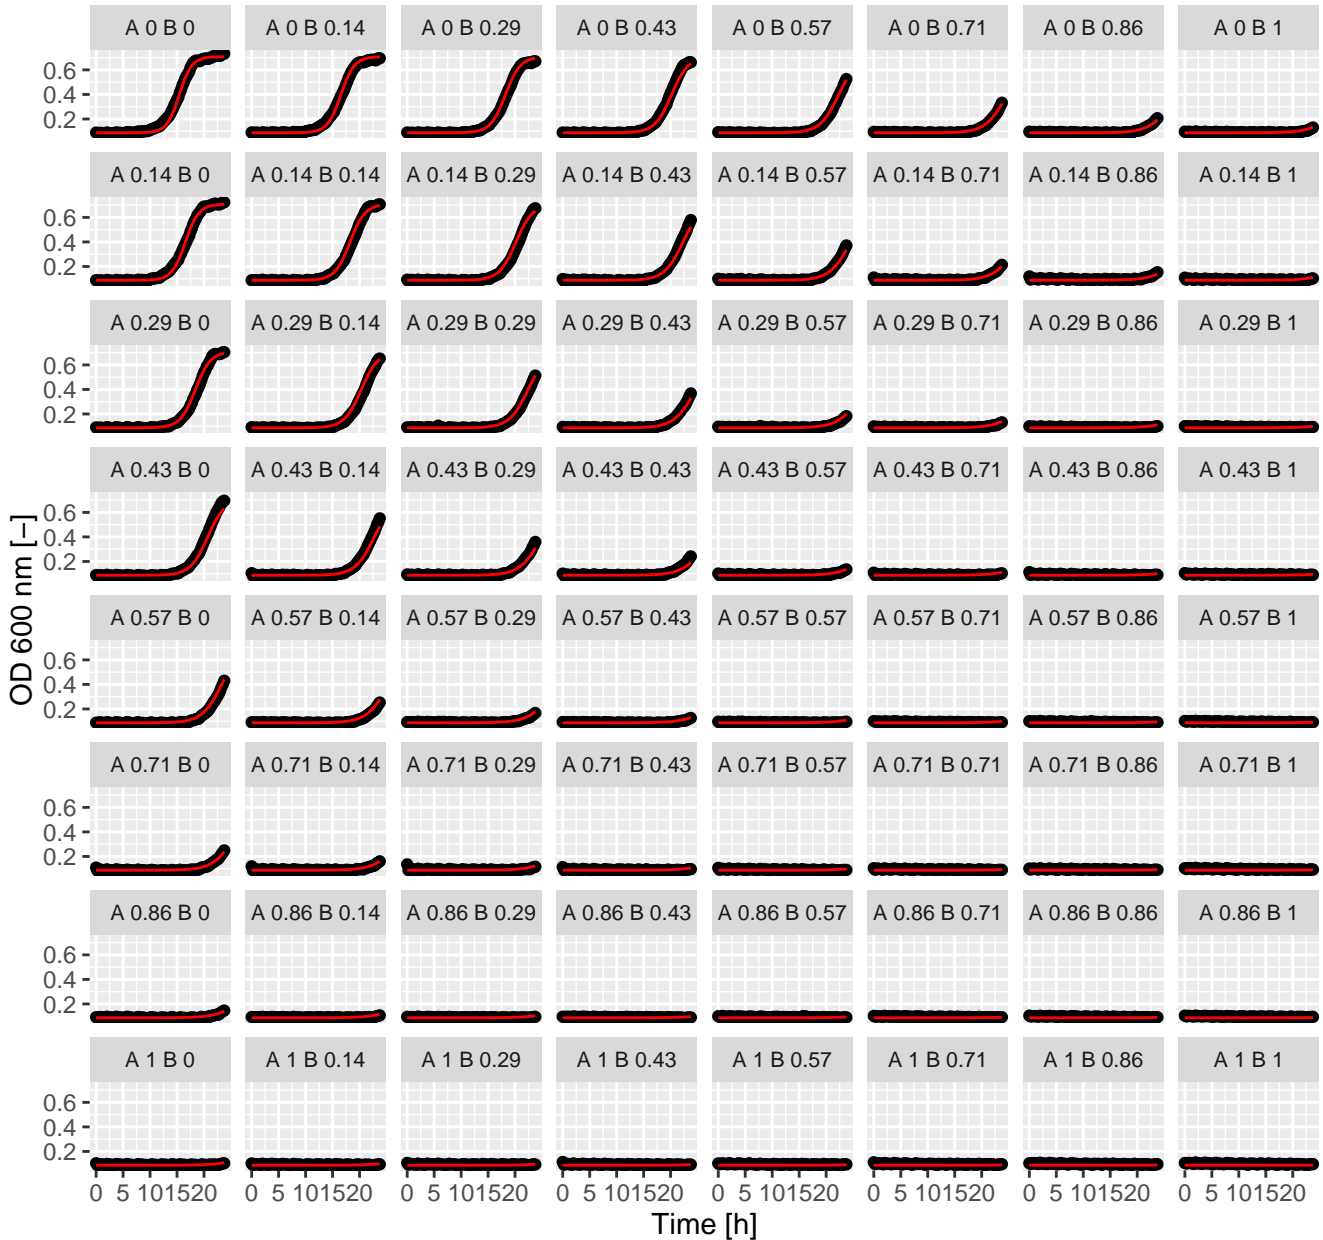



Ben.Bro (= Ax.Bx) exp. additivity (LA)  
Int\_AB = 0 and Int\_BA = 0 at EC50

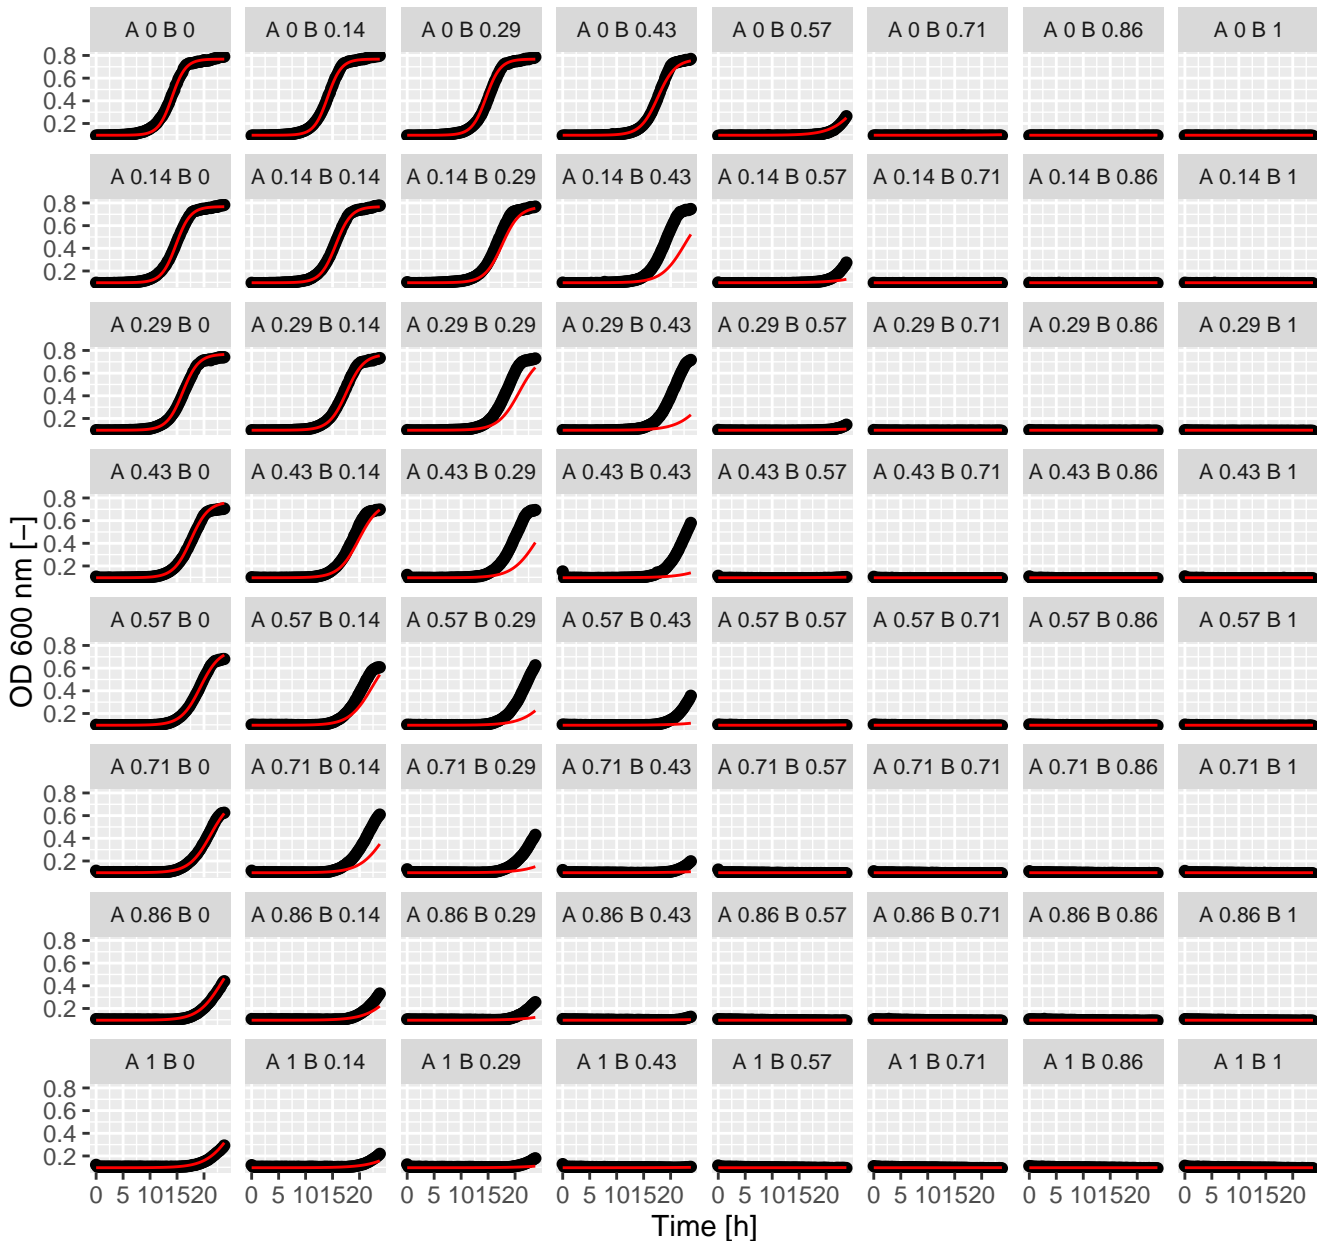

Ben.Bro (= Ax.Bx) full GPDI  
Int\_AB = 0.69 and Int\_BA = 0.27 at EC50

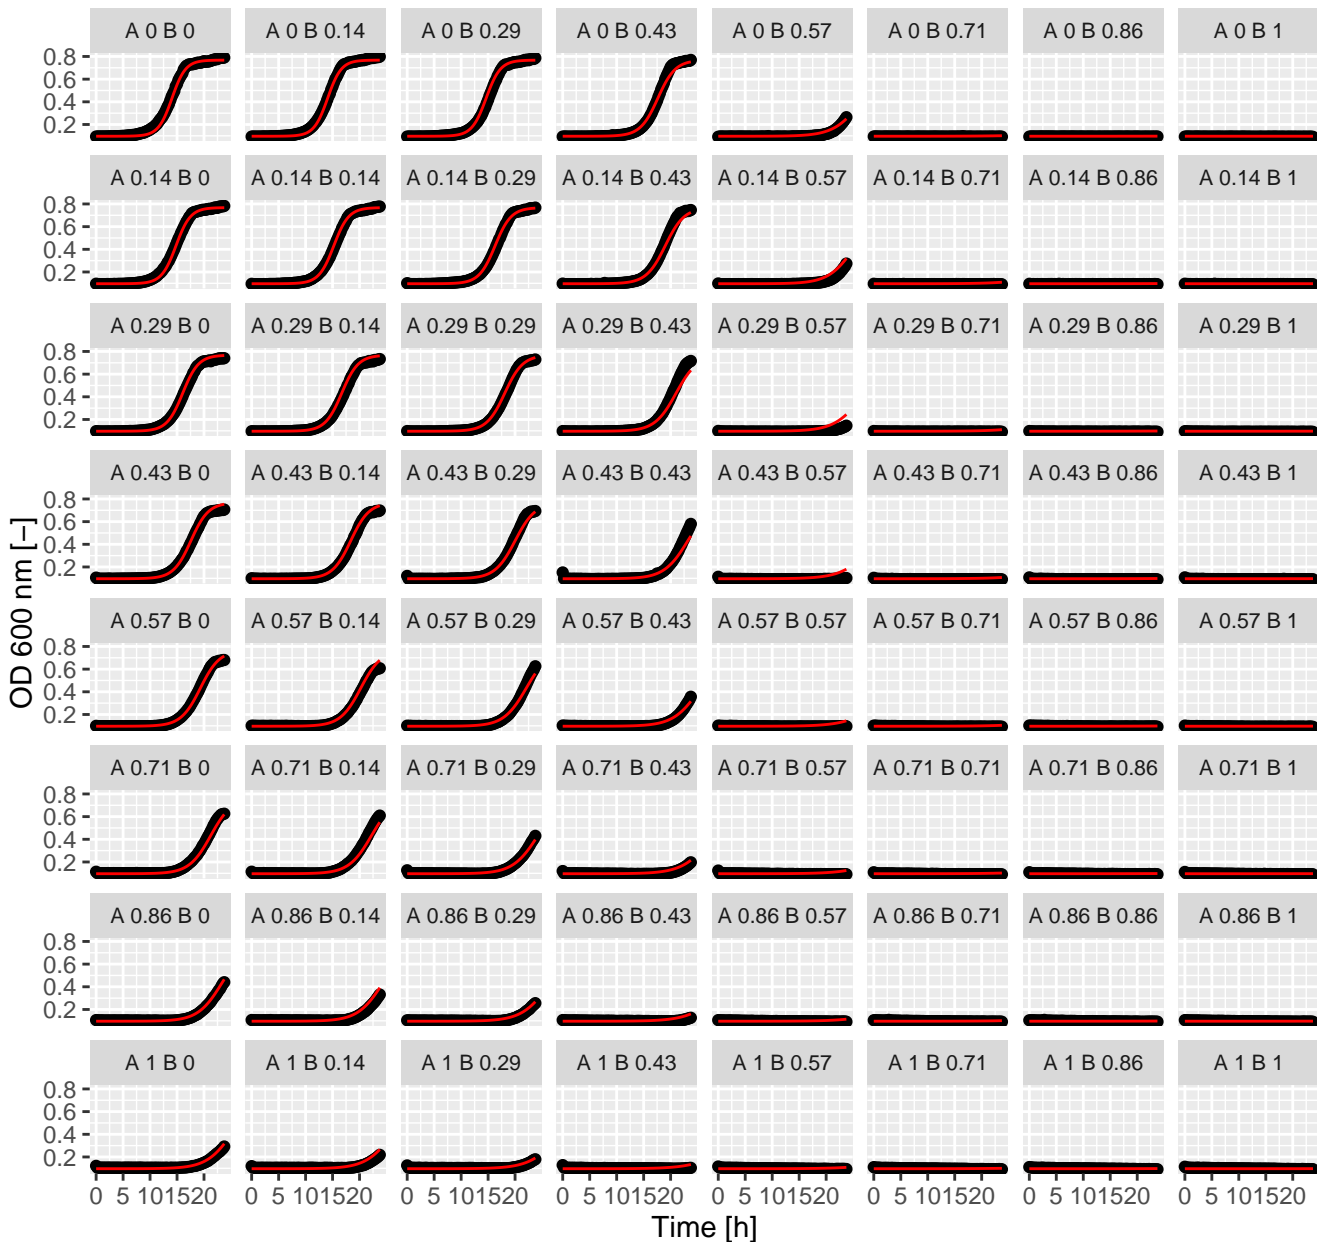

Ben.C3P (= Ax.Bx) exp. additivity (LA)  
Int\_AB = 0 and Int\_BA = 0 at EC50

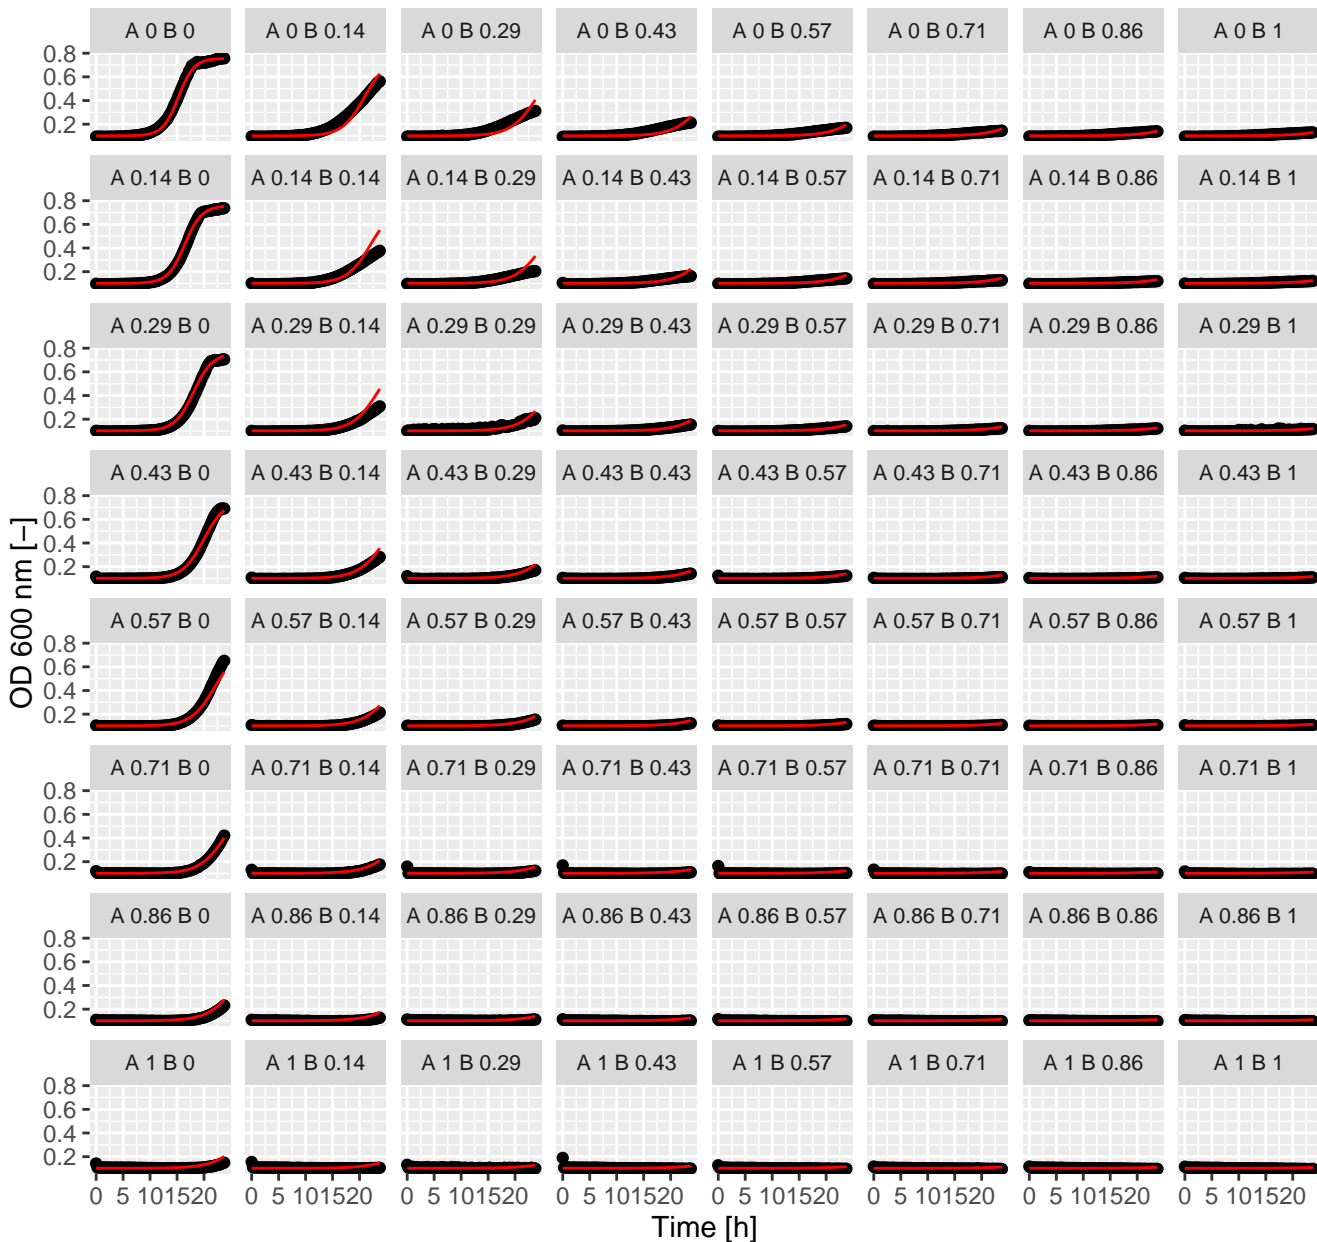

Ben.C3P (= Ax.Bx) full GPD1  
Int\_AB = -0.29 and Int\_BA = -0.21 at EC50

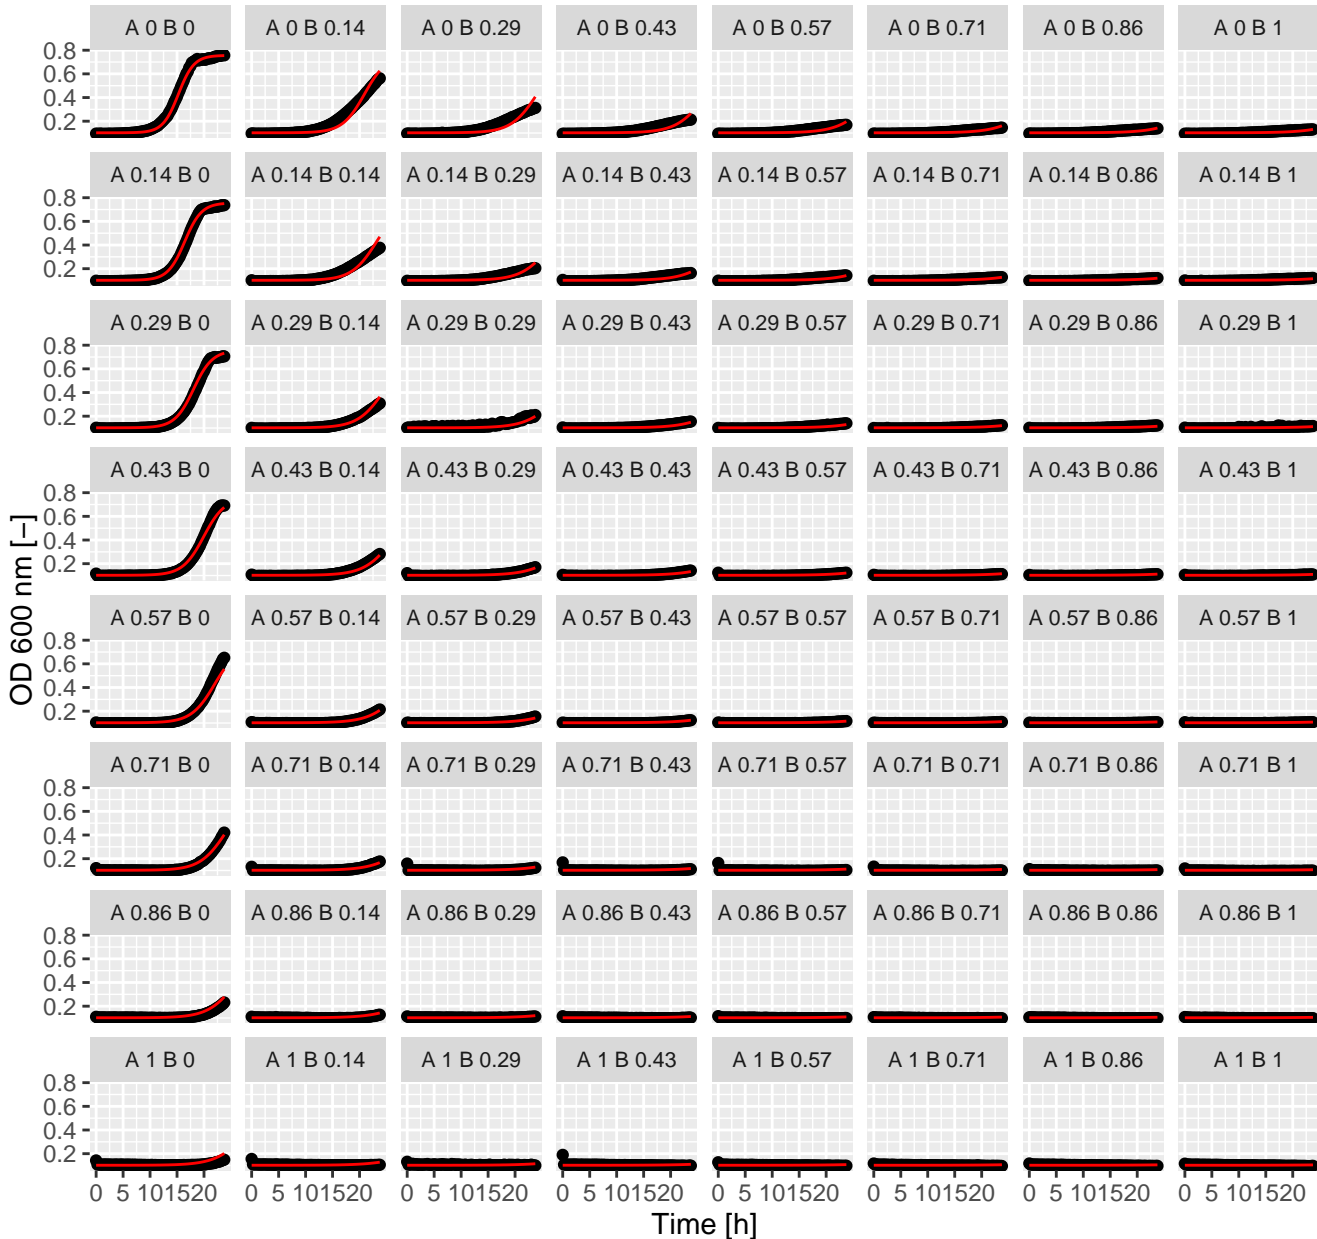

Ben.Cal (= Ax.Bx) exp. additivity (LA)  
Int\_AB = 0 and Int\_BA = 0 at EC50

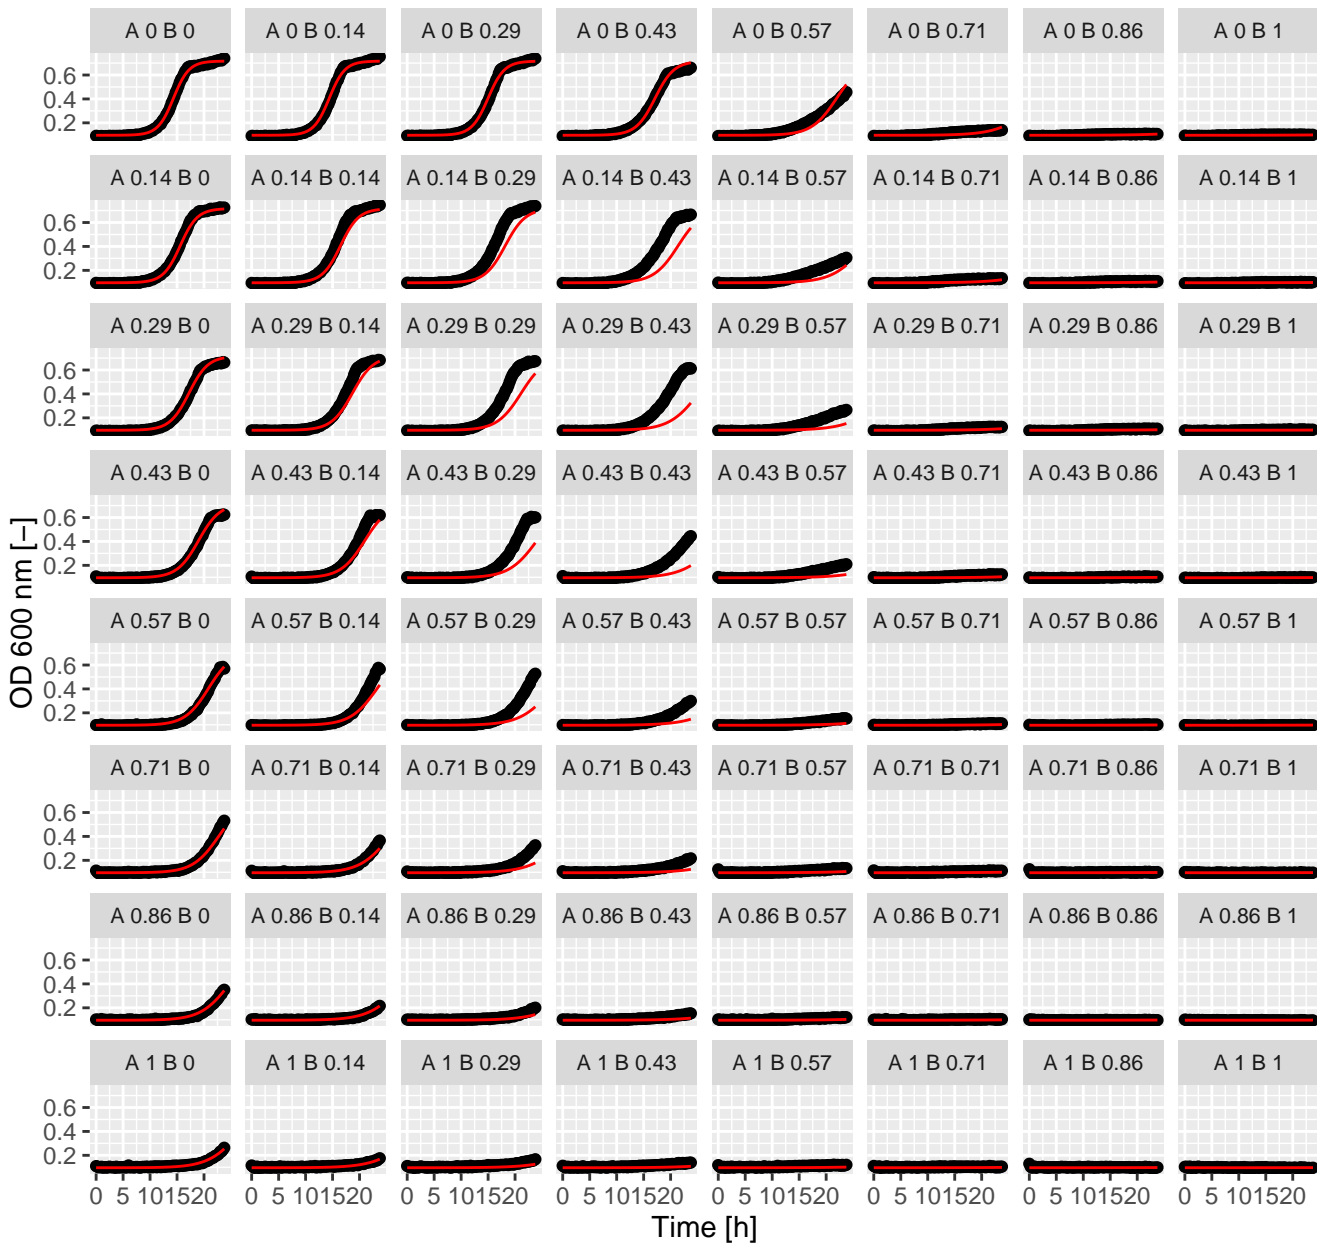

Ben.Cal (= Ax.Bx) full GPDI  
Int\_AB = 1.08 and Int\_BA = 0.11 at EC50

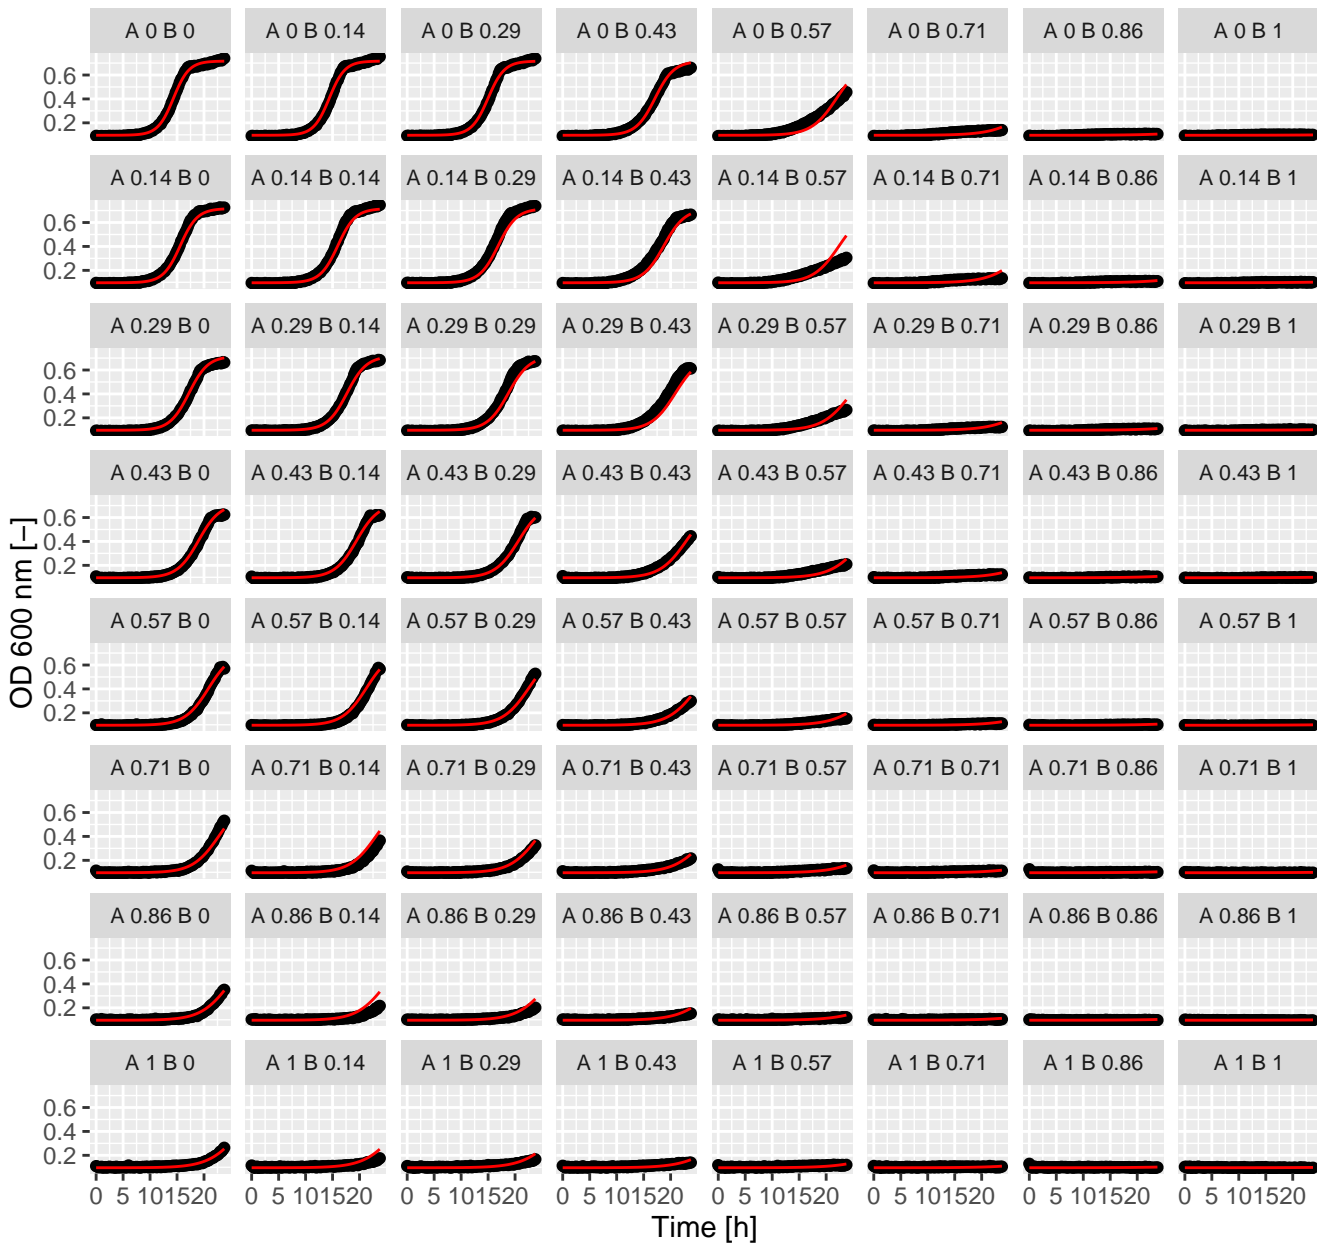

Ben.Chl (= Ax.Bx) exp. additivity (LA)  
Int\_AB = 0 and Int\_BA = 0 at EC50

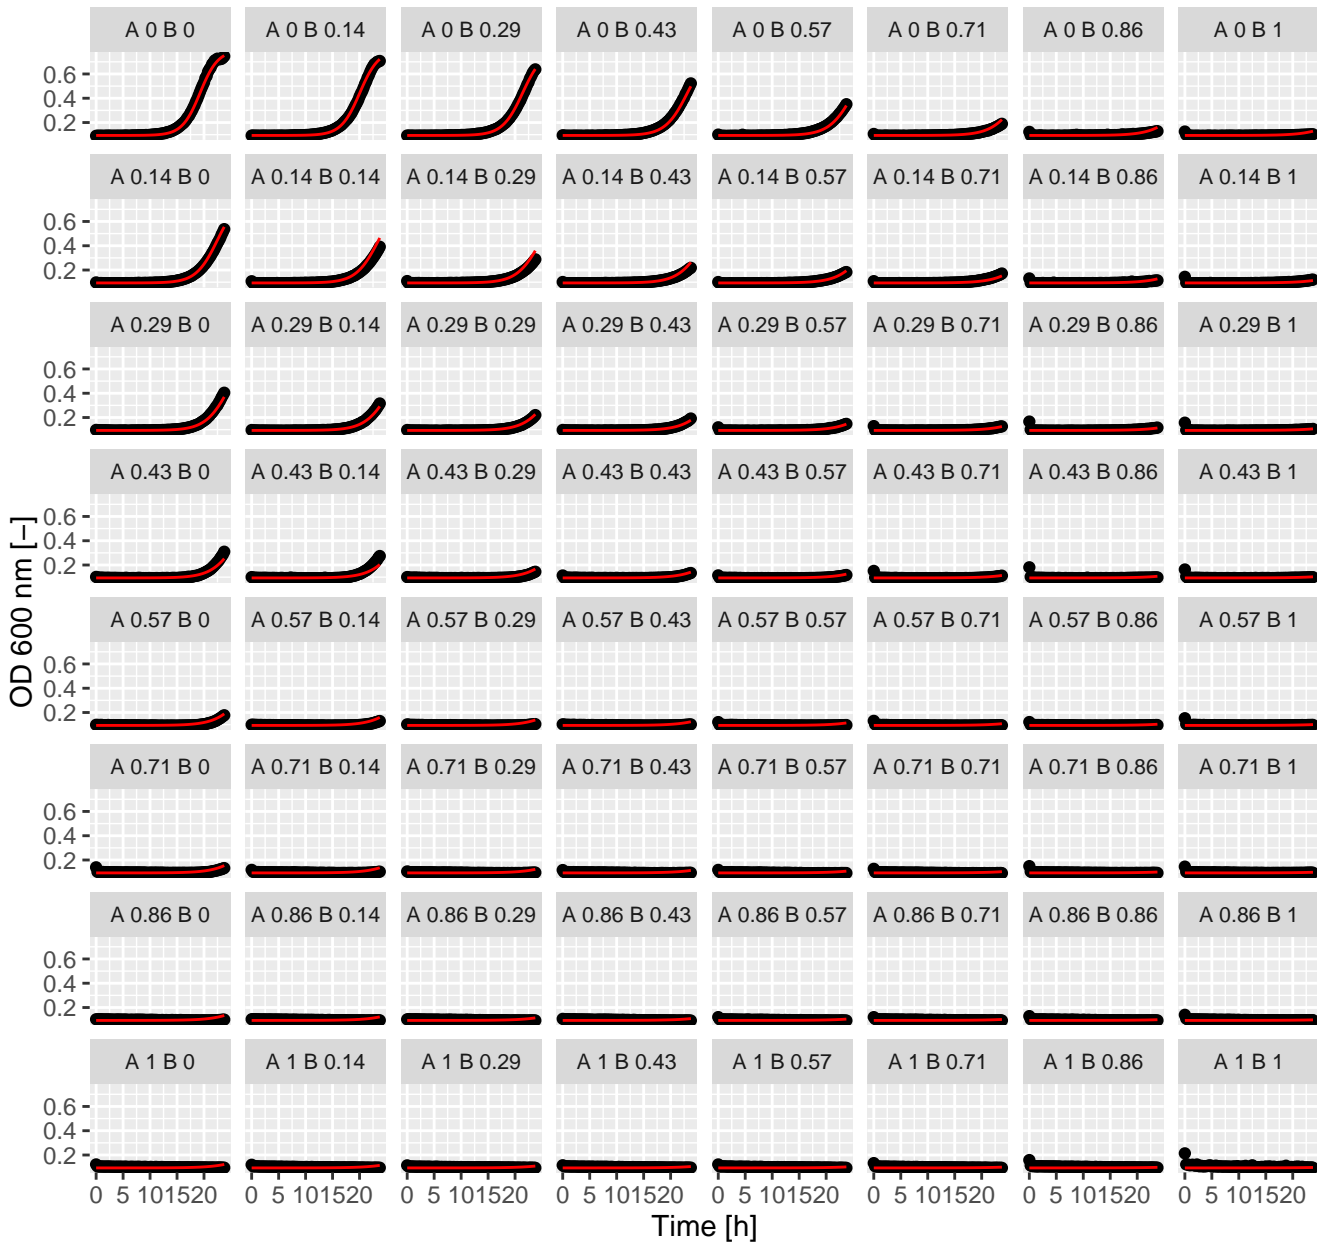

Ben.Chl (= Ax.Bx) full GPDI  
Int\_AB = -0.66 and Int\_BA = 3.67 at EC50

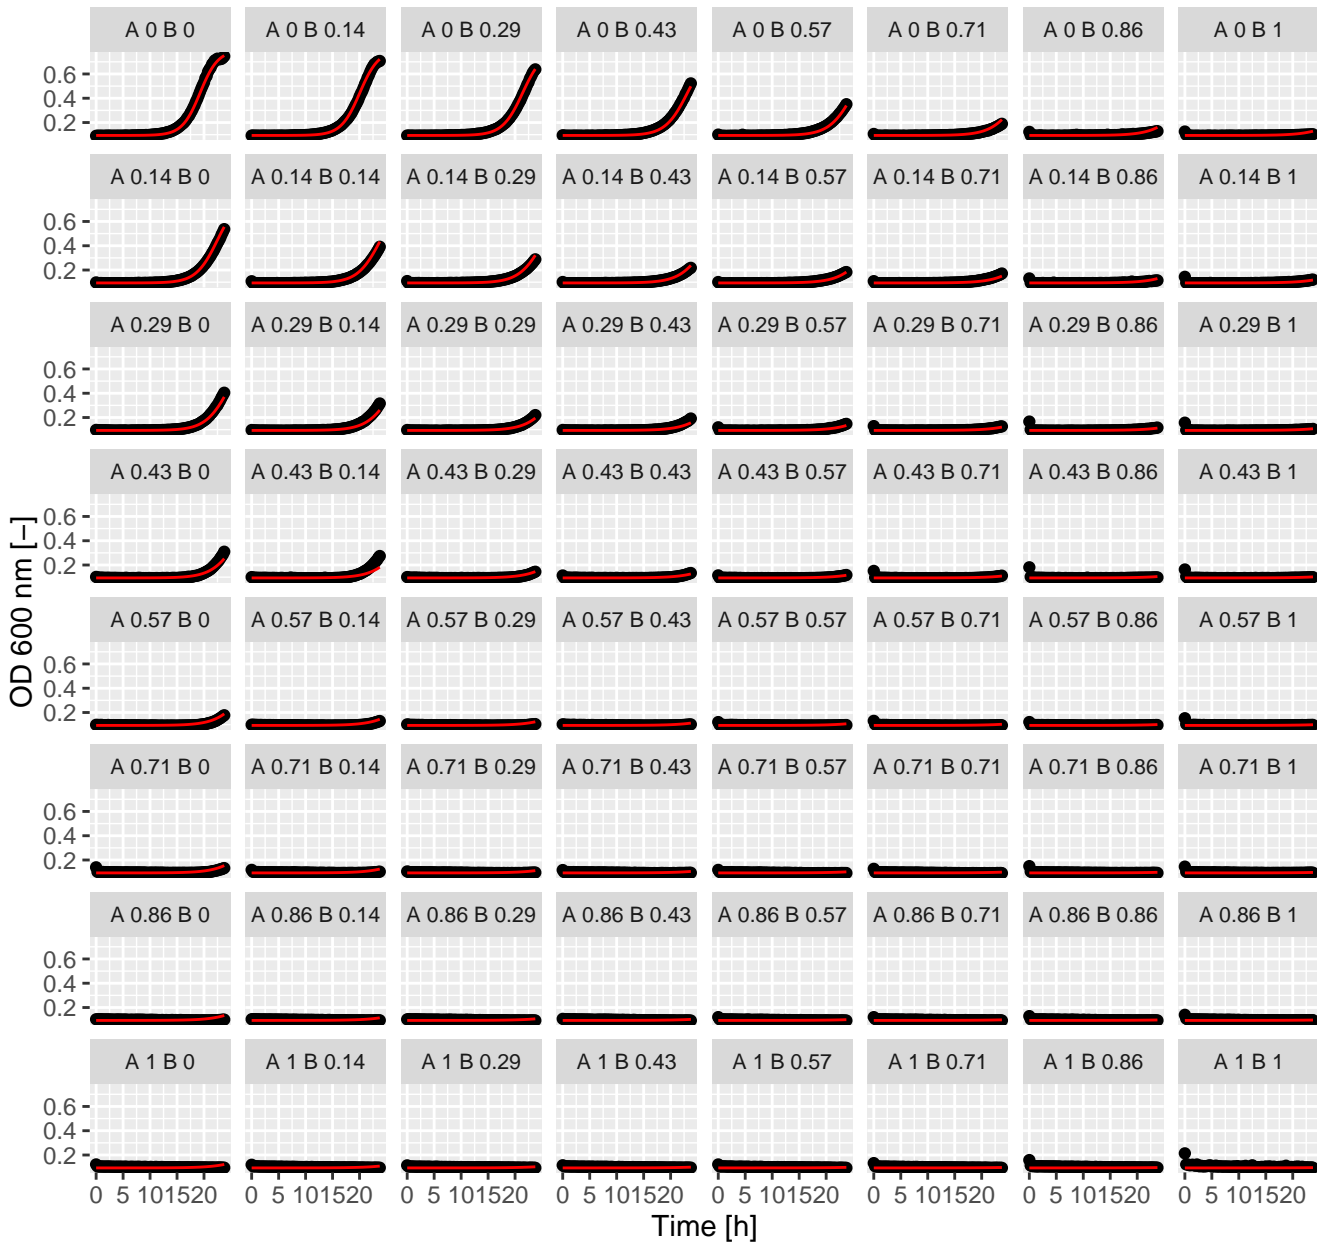



Ben.Cis (= Ax.Bx) exp. additivity (LA)  
Int\_AB = 0 and Int\_BA = 0 at EC50

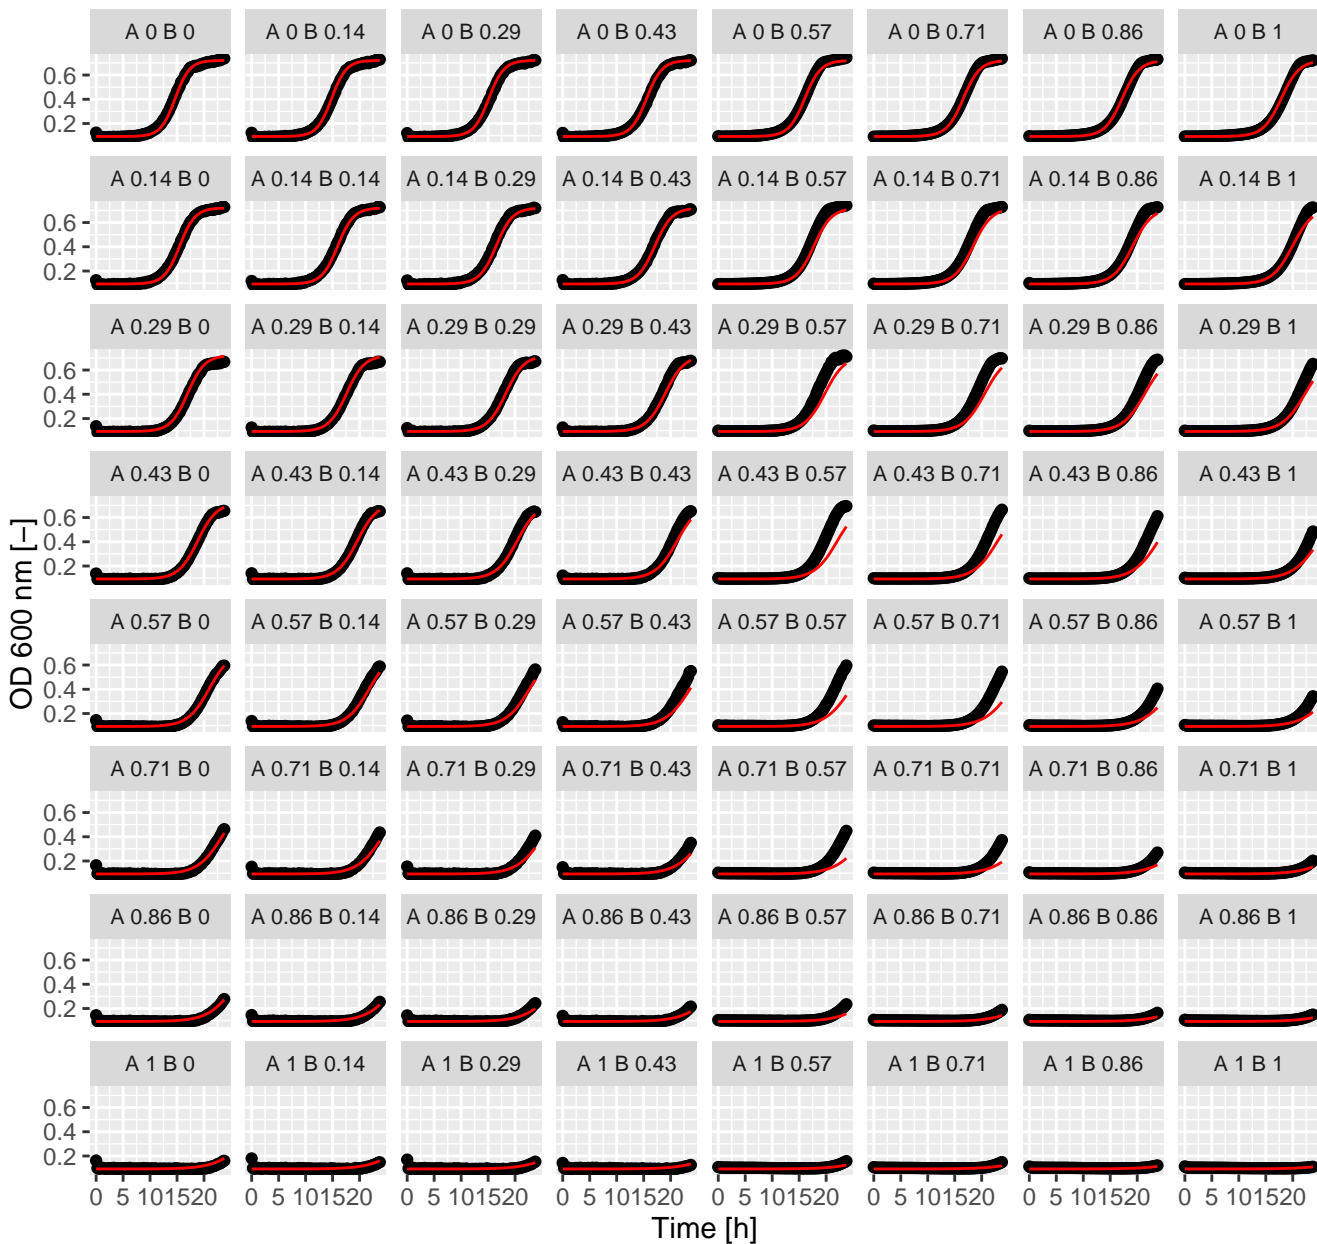

Ben.Cis (= Ax.Bx) full GPDI  
Int\_AB = 0.28 and Int\_BA = 0.26 at EC50

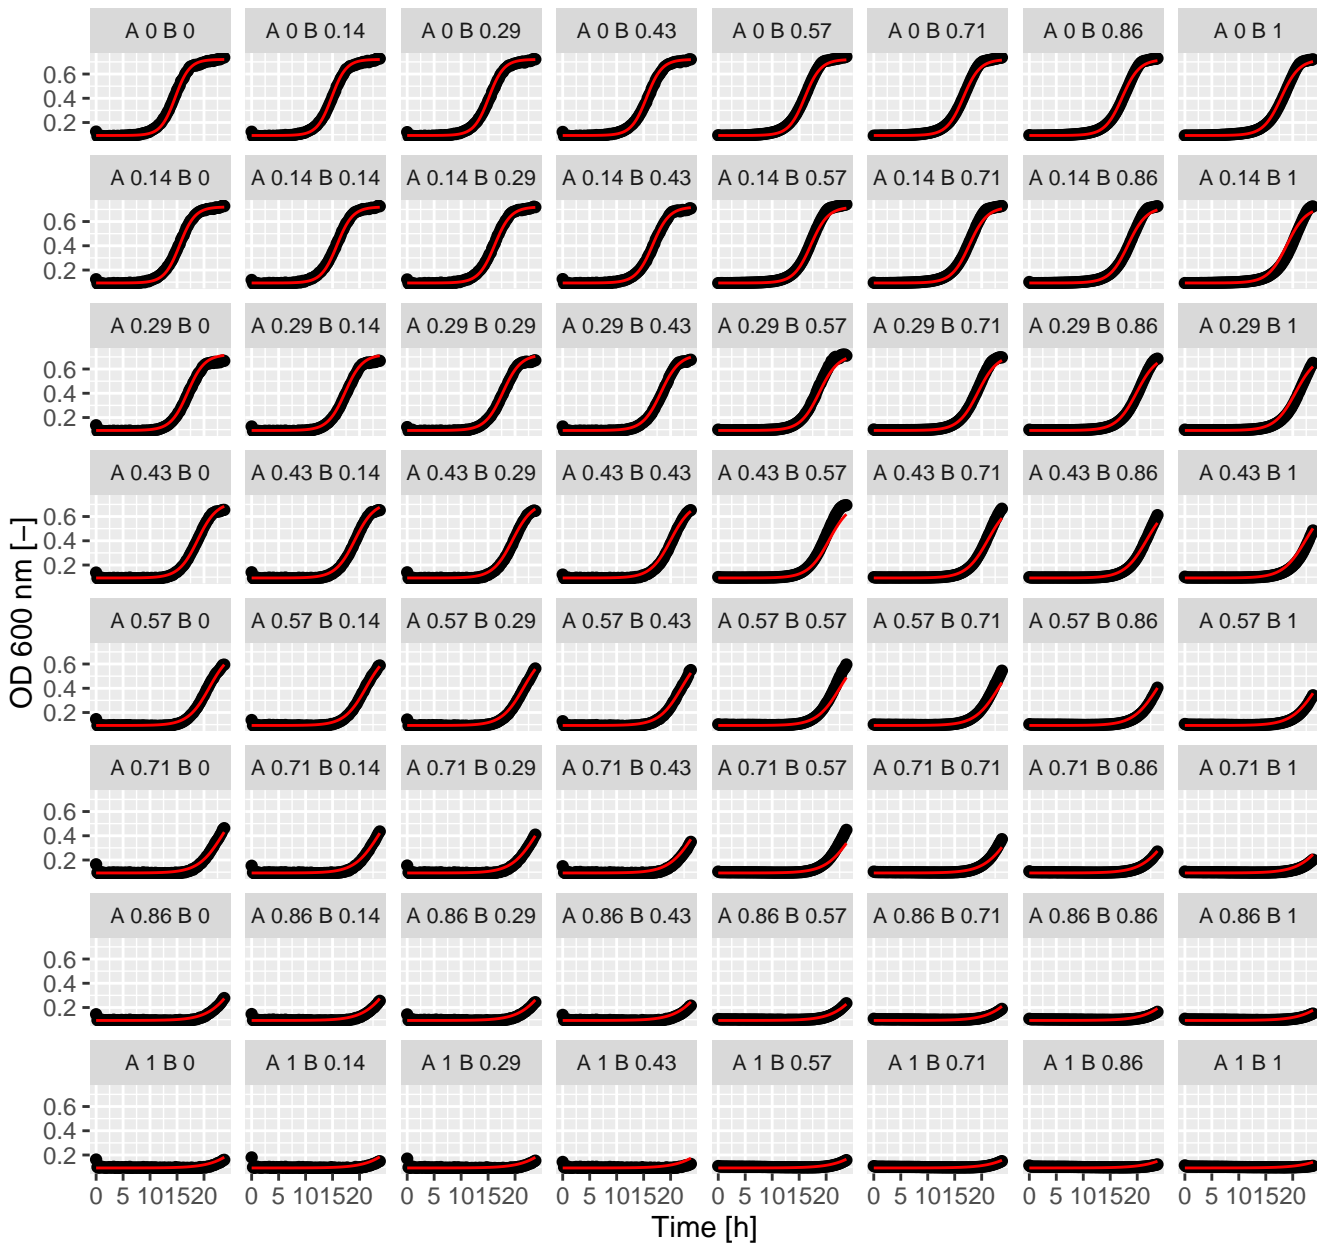

Ben.Cyc (= Ax.Bx) exp. additivity (LA)  
Int\_AB = 0 and Int\_BA = 0 at EC50

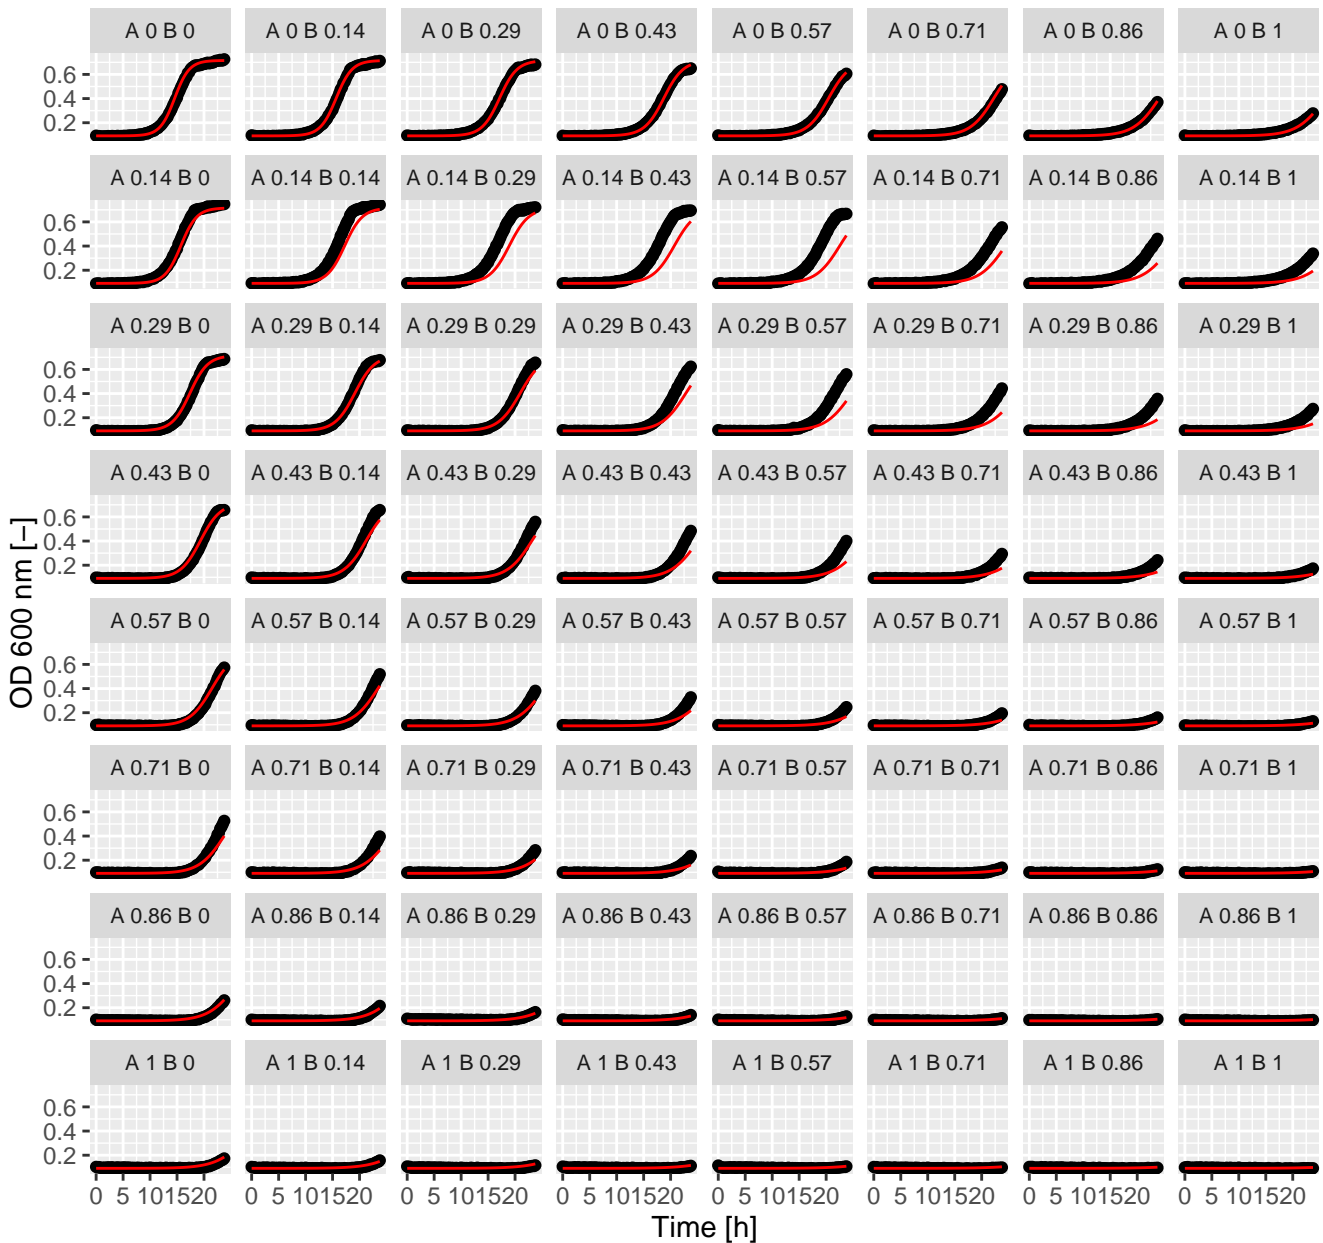

Ben.Cyc (= Ax.Bx) full GPDI  
Int\_AB = -0.01 and Int\_BA = 0.6 at EC50

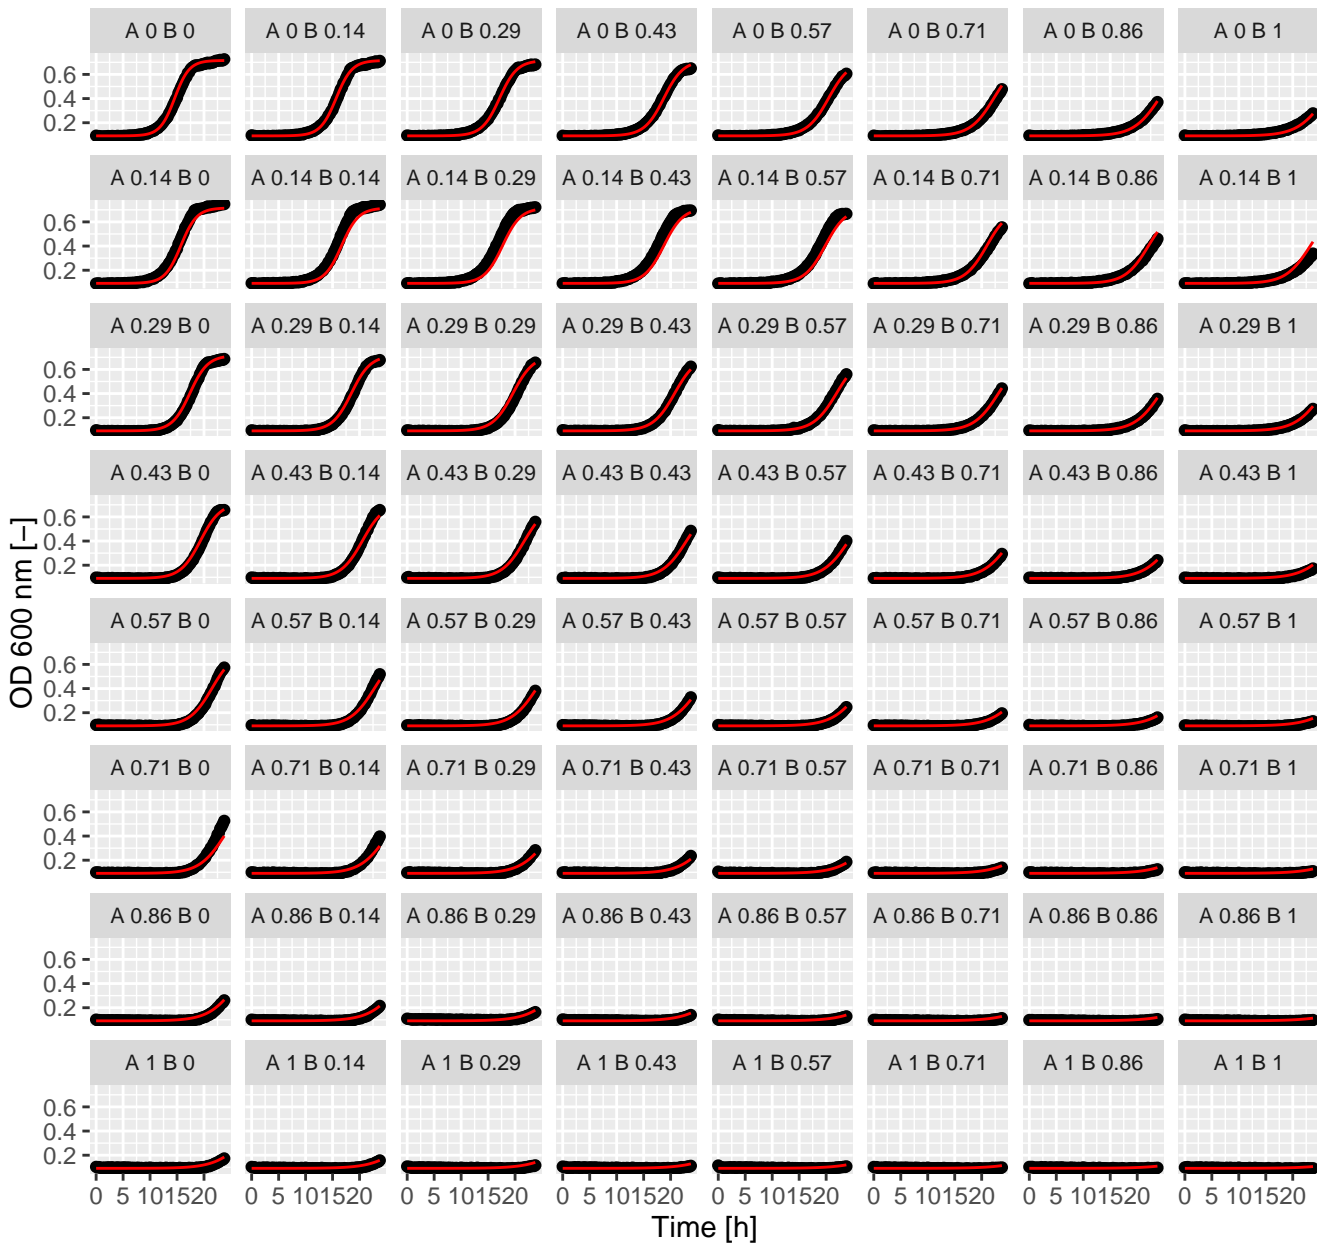

Ben.Dyc (= Ax.Bx) exp. additivity (LA)  
Int\_AB = 0 and Int\_BA = 0 at EC50

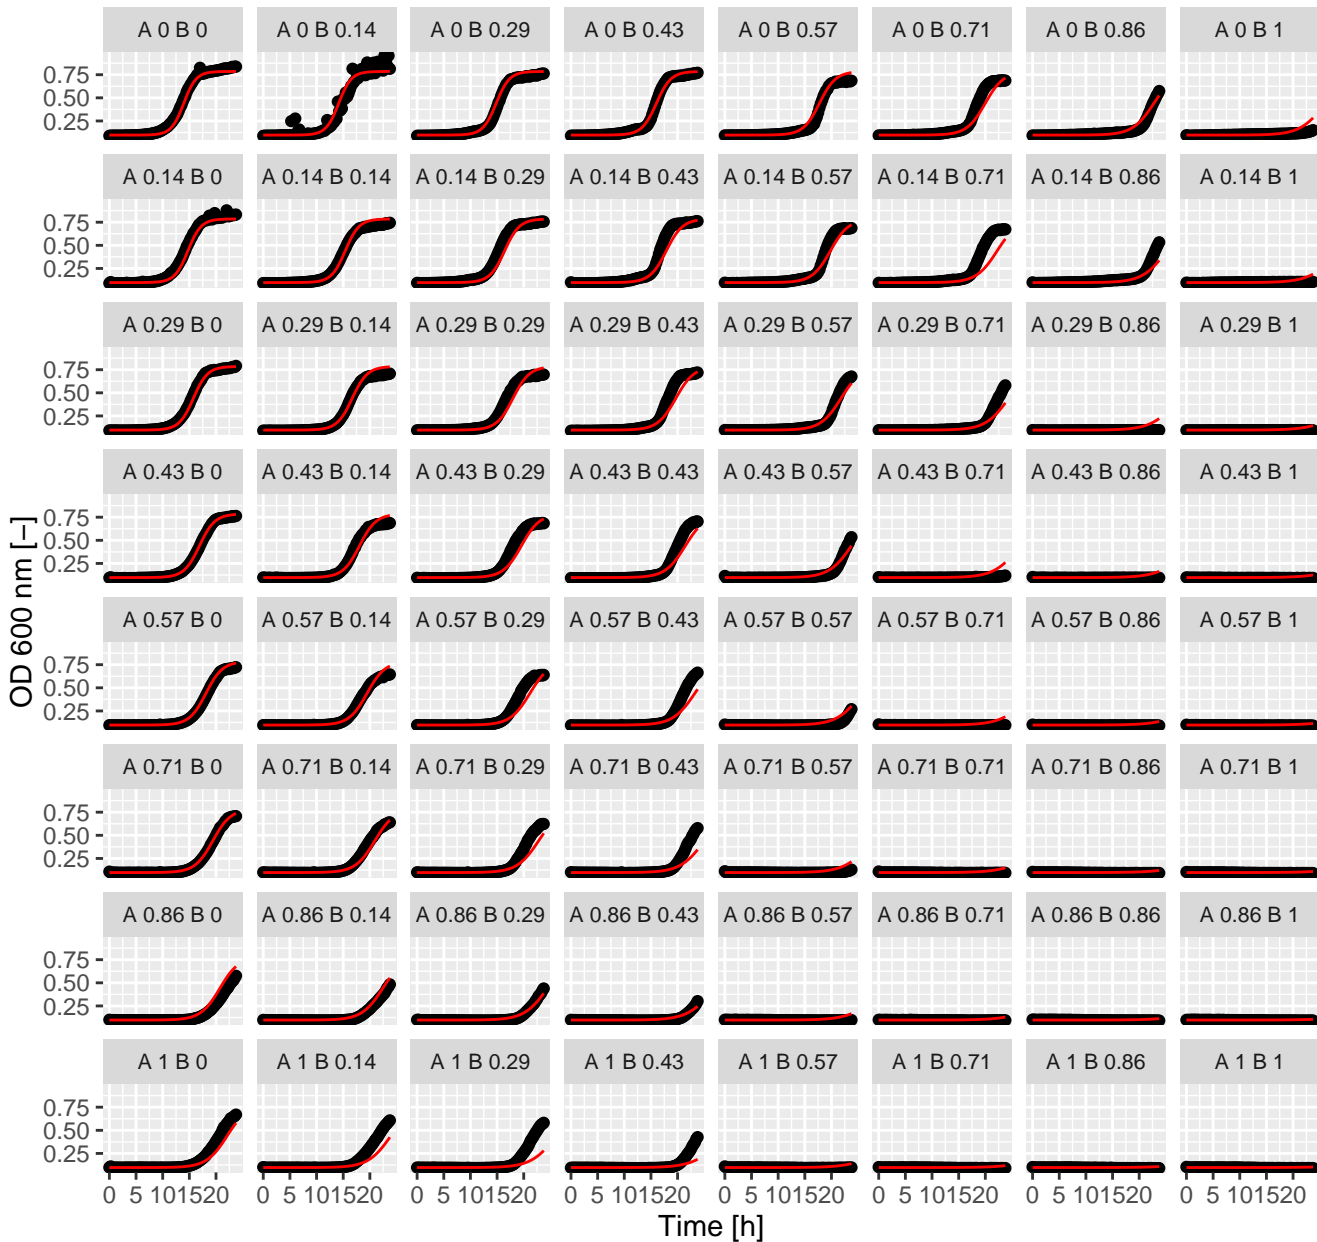



Ben.Fen (= Ax.Bx) exp. additivity (LA)  
Int\_AB = 0 and Int\_BA = 0 at EC50

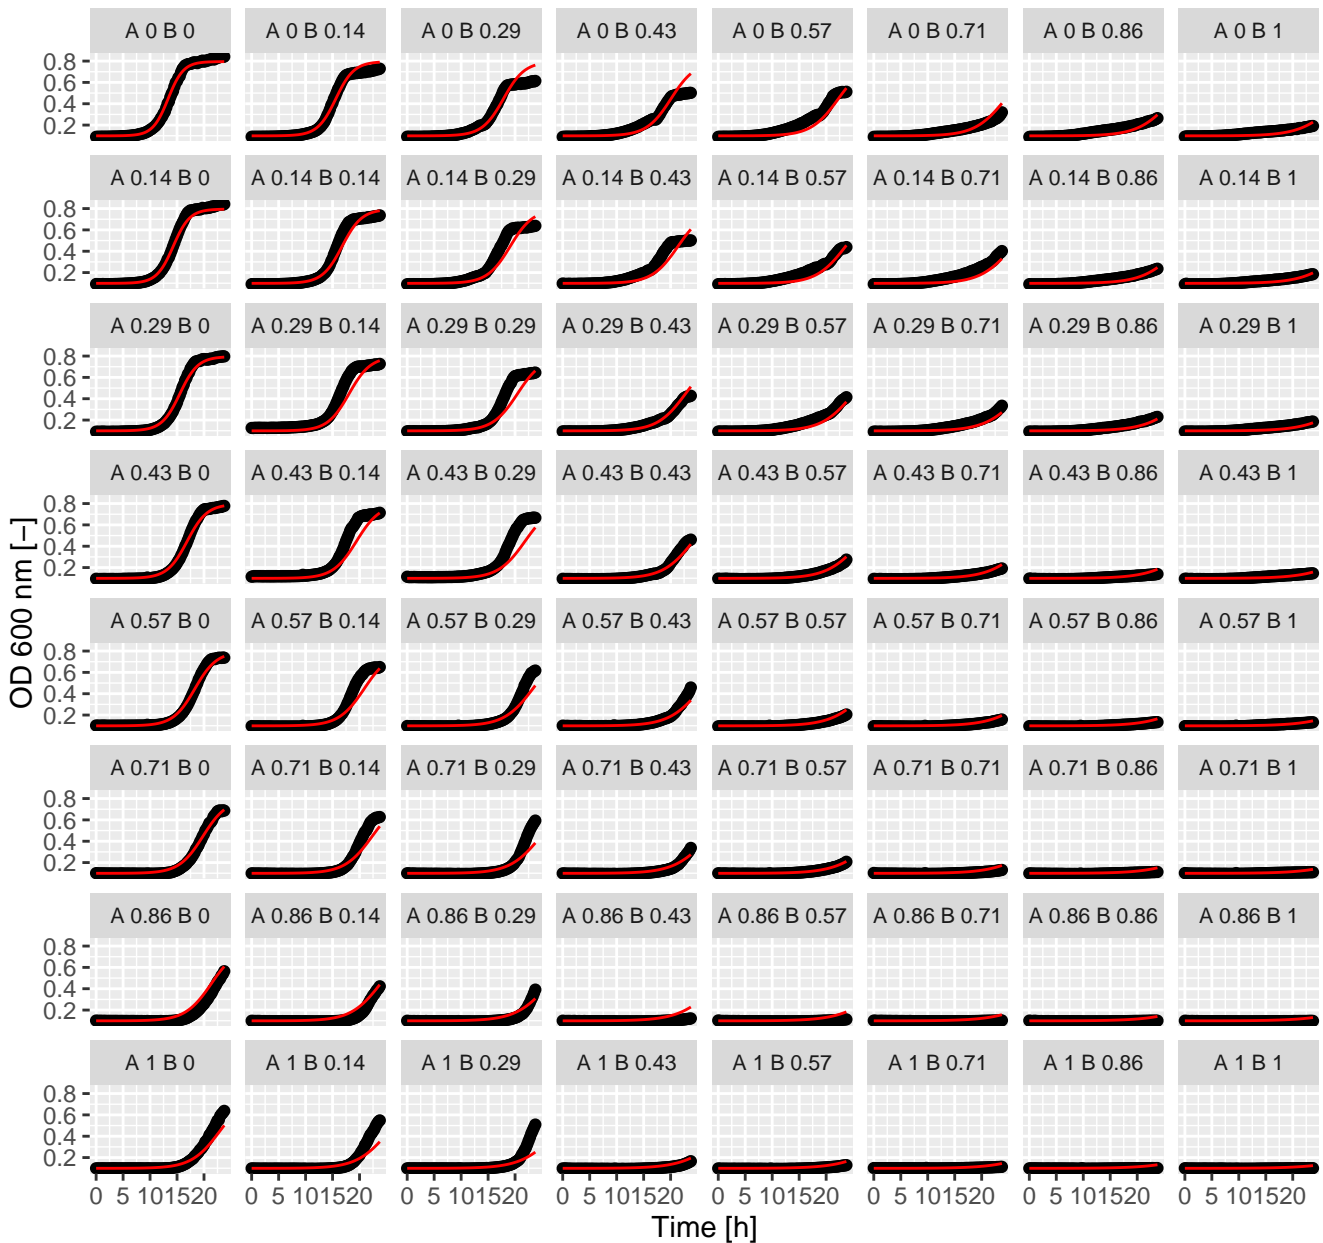

Ben.Fen (= Ax.Bx) full GPDI  
Int\_AB = 0.14 and Int\_BA = 0.09 at EC50

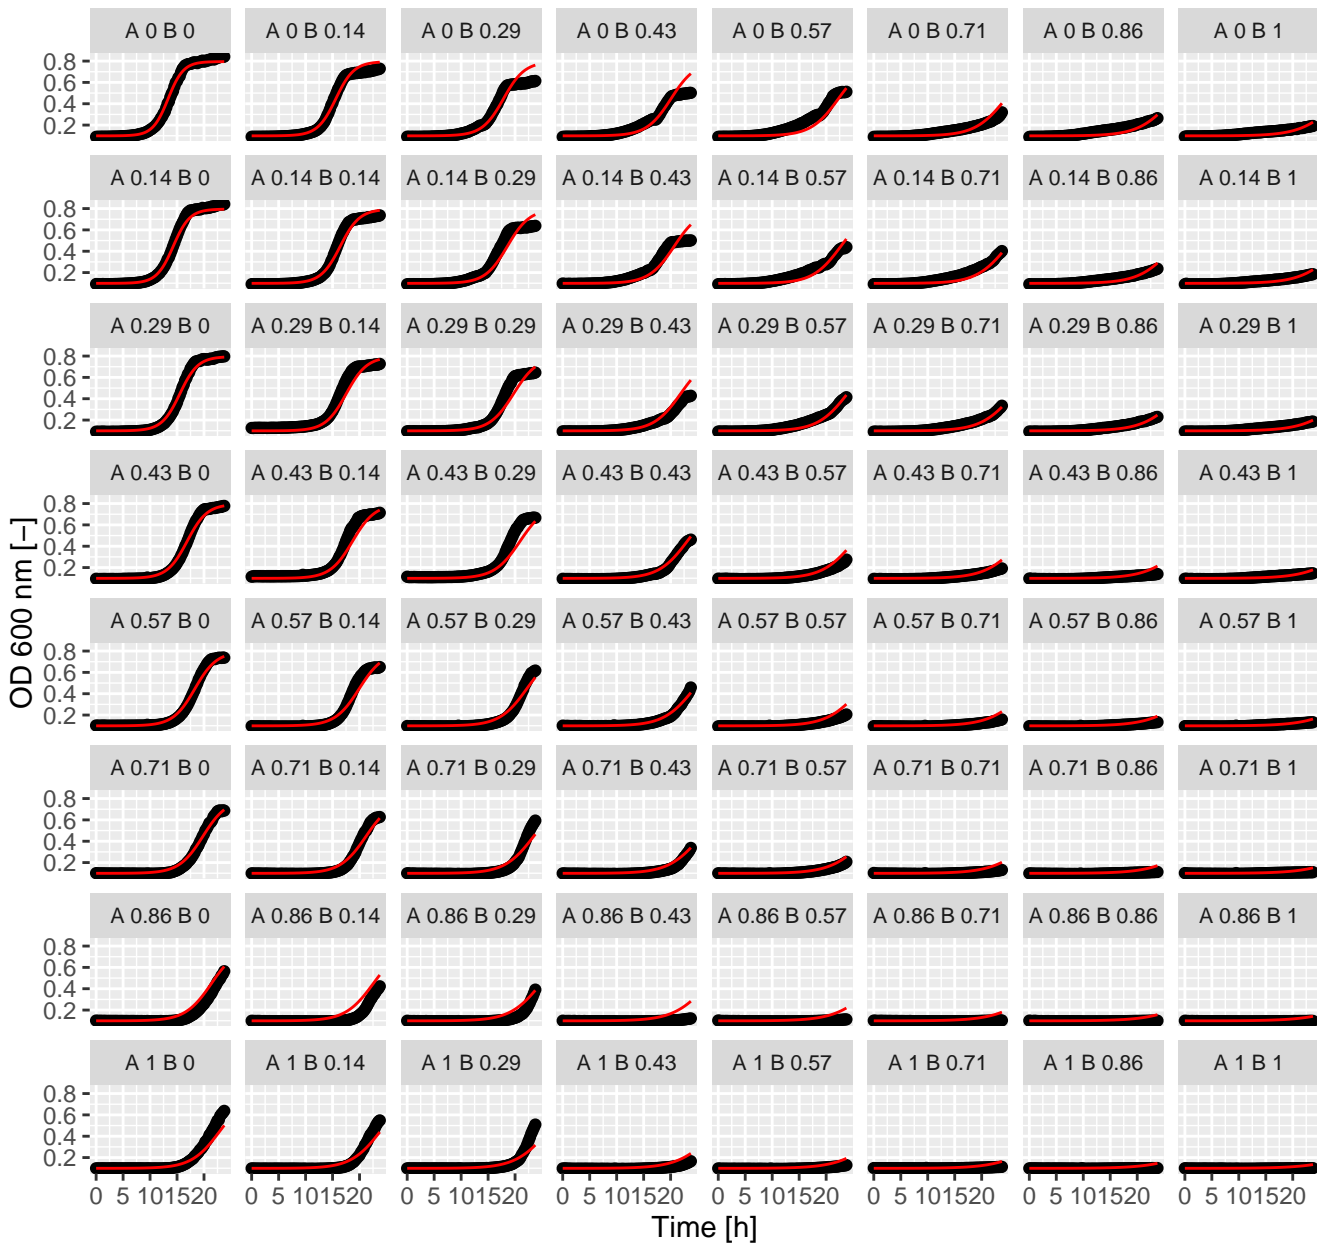



Ben.Hal (= Ax.Bx) exp. additivity (LA)  
Int\_AB = 0 and Int\_BA = 0 at EC50

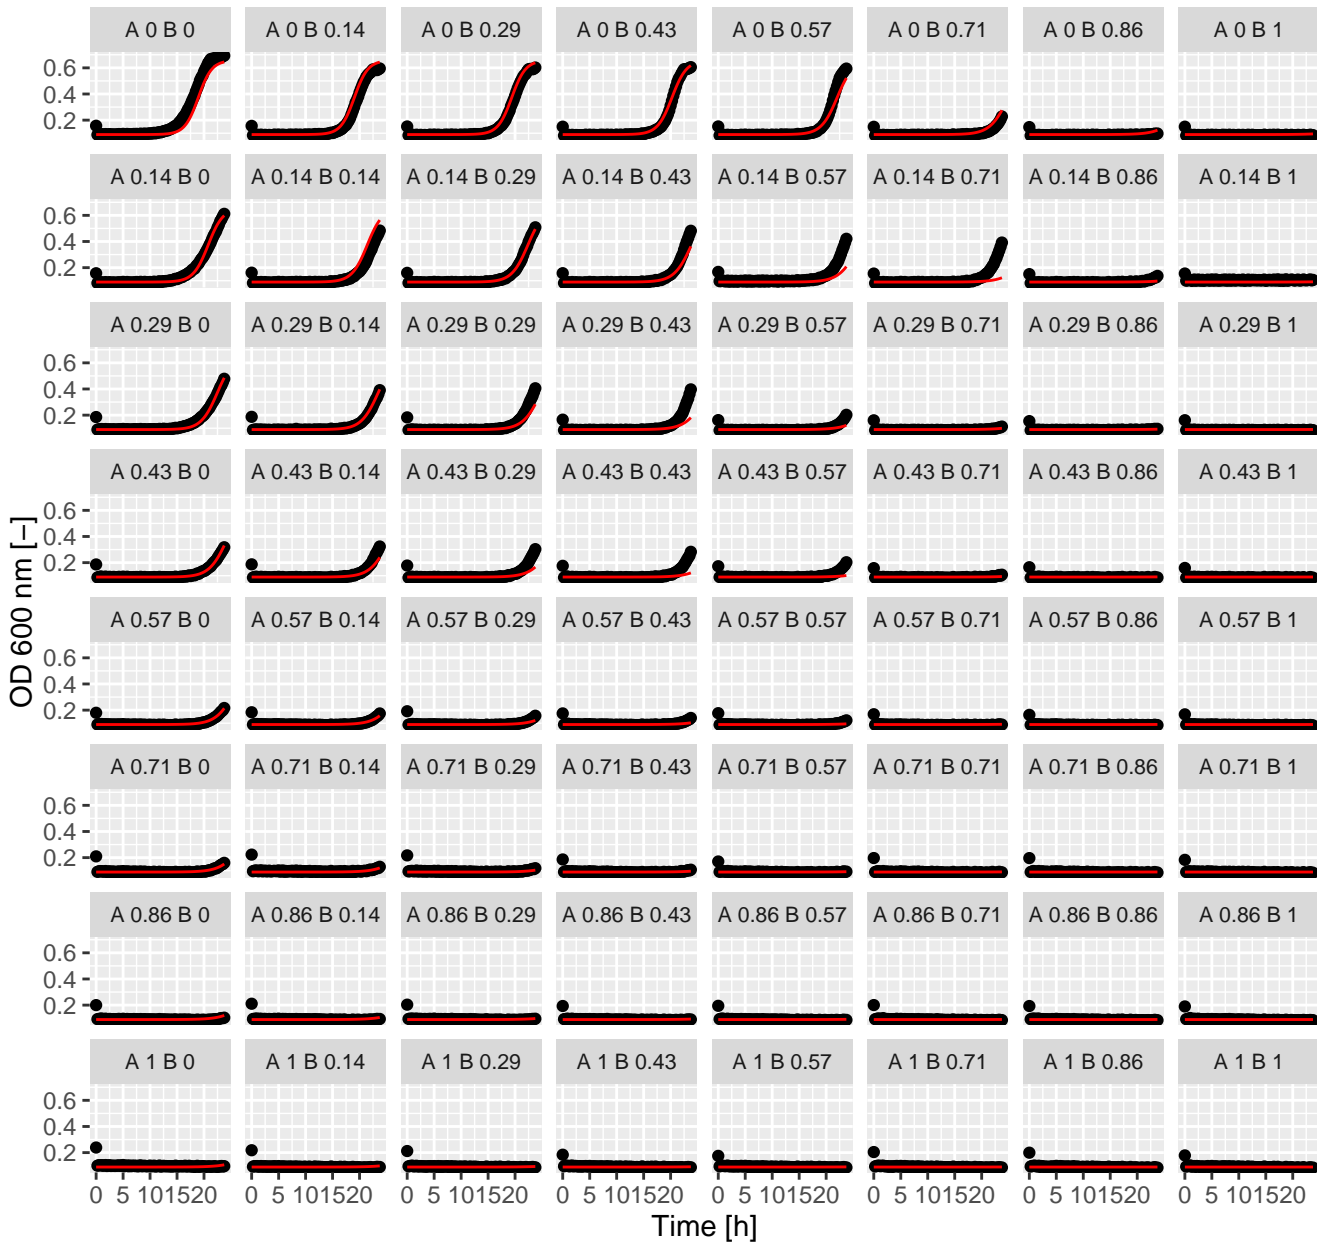

Ben.Hal (= Ax.Bx) full GPDI  
Int\_AB = -0.04 and Int\_BA = 3.19 at EC50

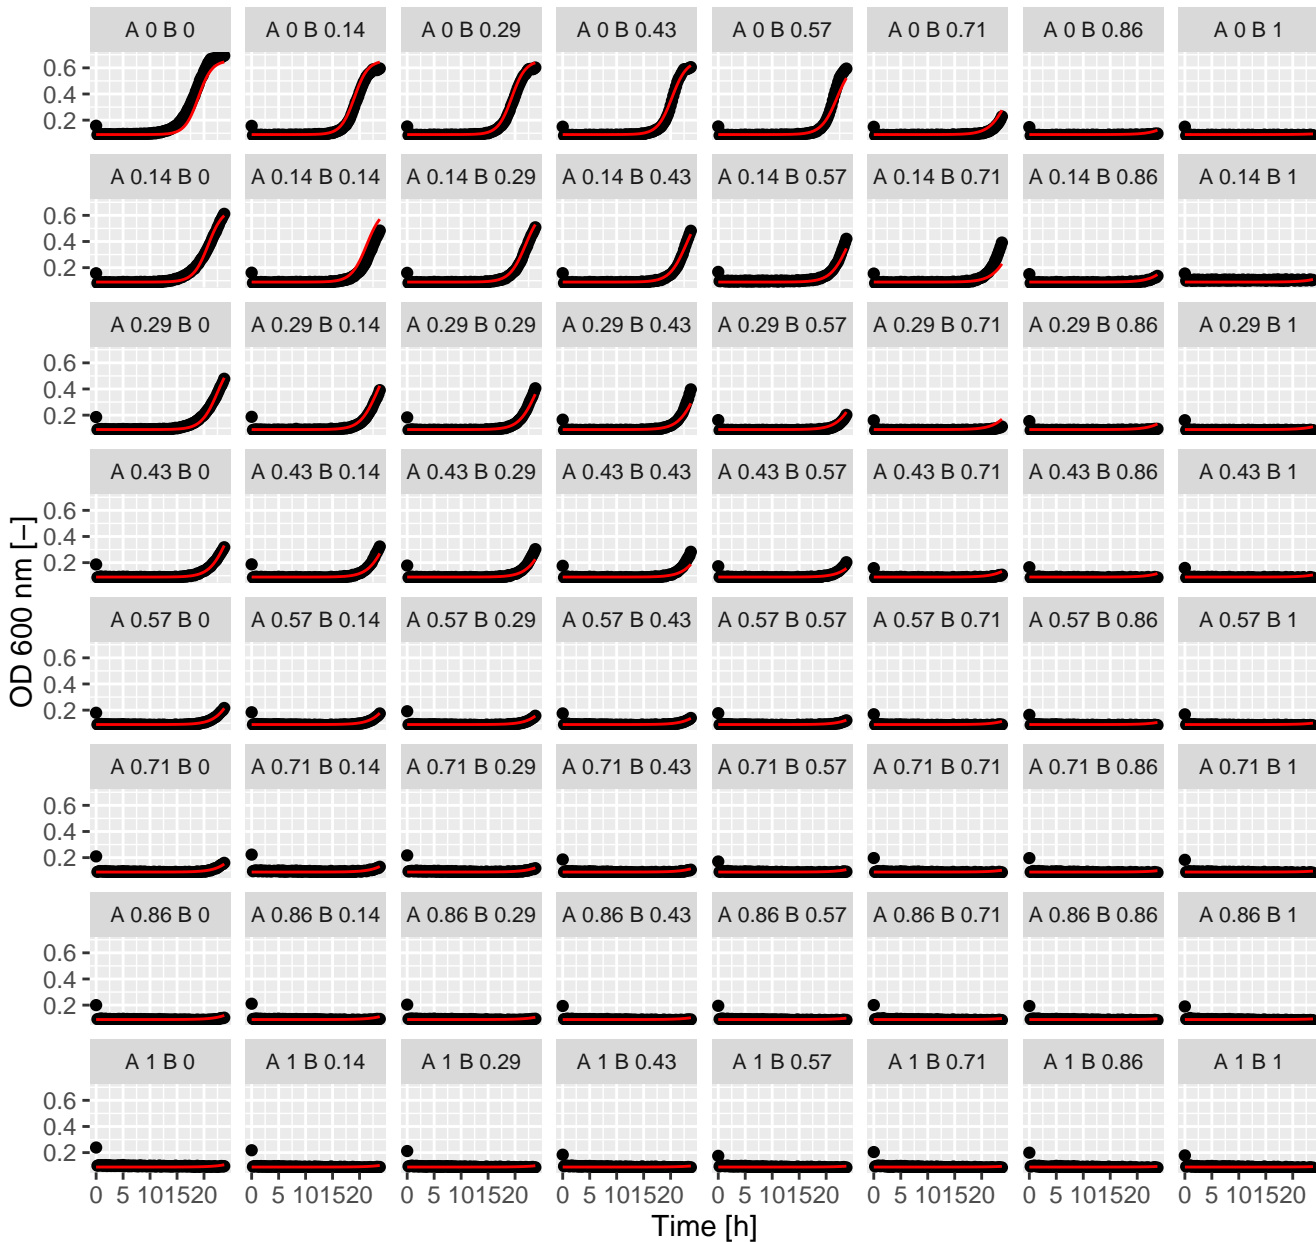

Ben.Lat (= Ax.Bx) exp. additivity (LA)  
Int\_AB = 0 and Int\_BA = 0 at EC50

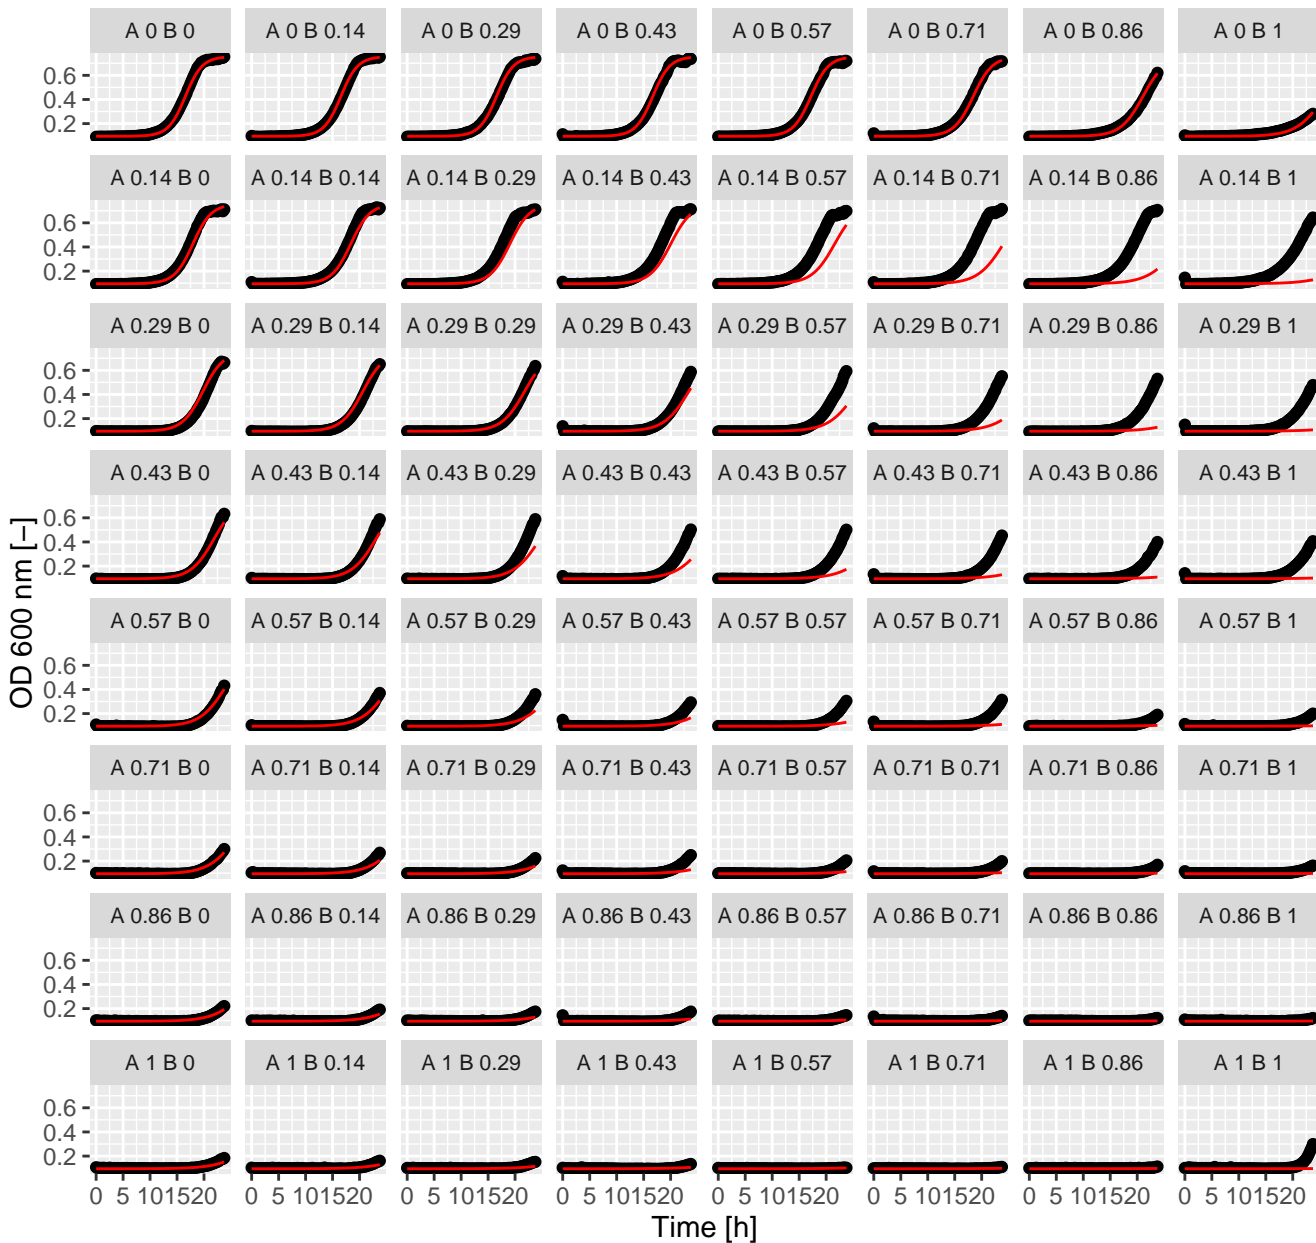

Ben.Lat (= Ax.Bx) full GPDI  
Int\_AB = -0.04 and Int\_BA = 2.12 at EC50

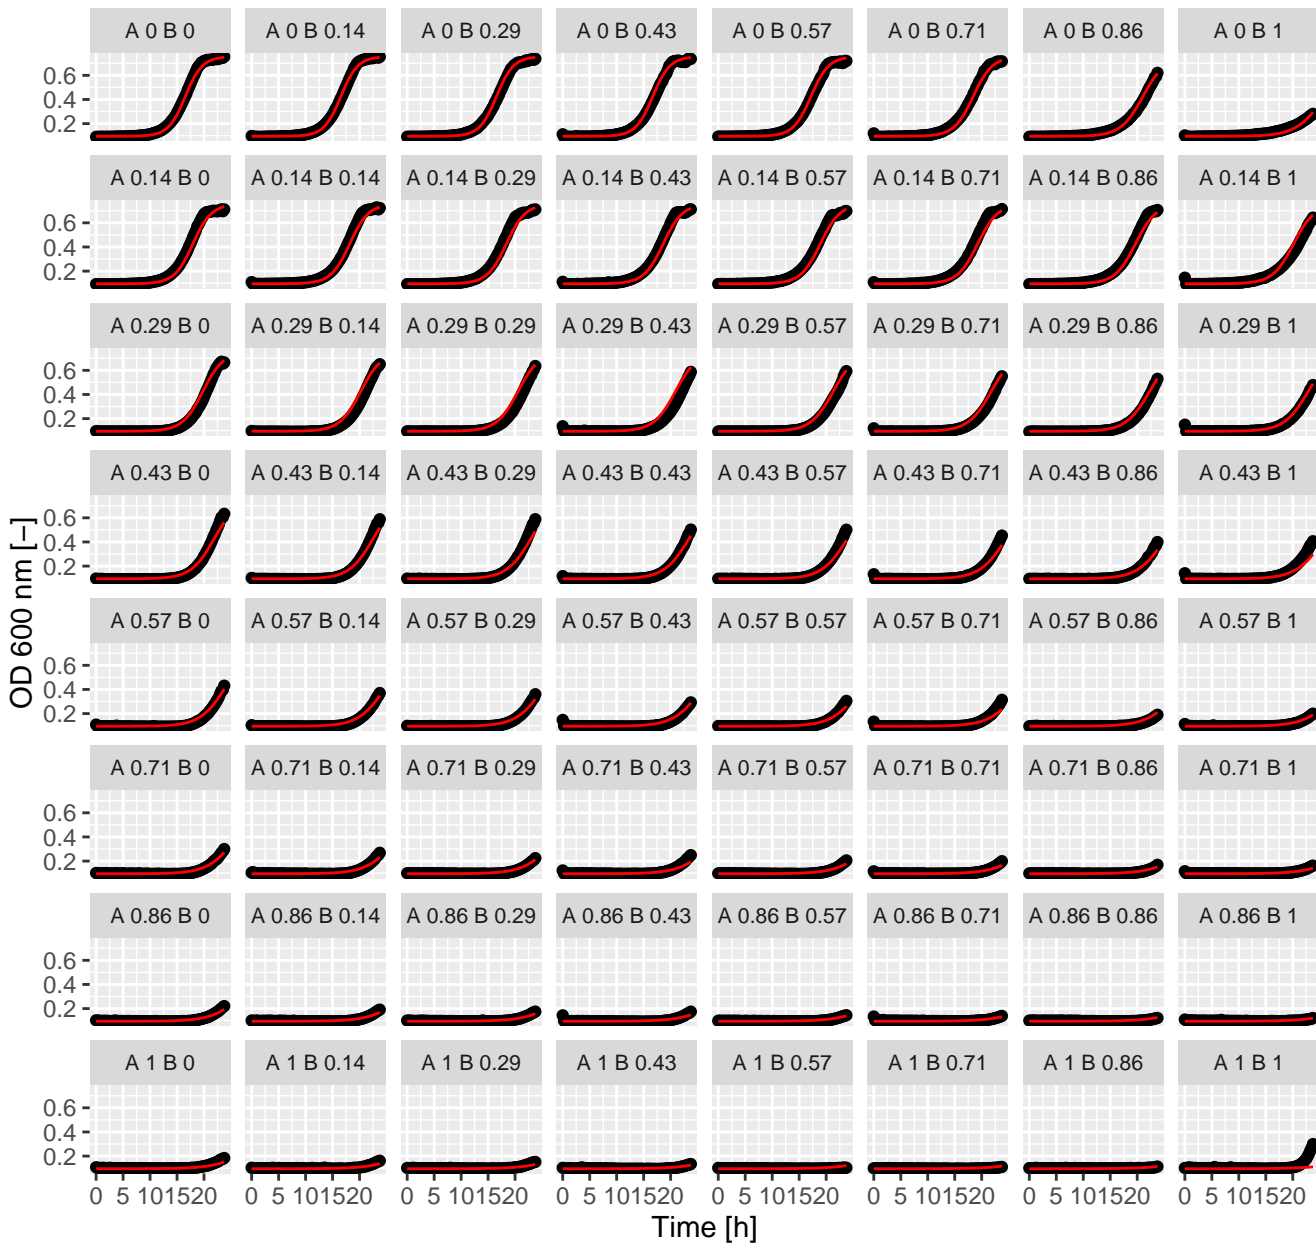

Ben.Met (= Ax.Bx) exp. additivity (LA)  
Int\_AB = 0 and Int\_BA = 0 at EC50

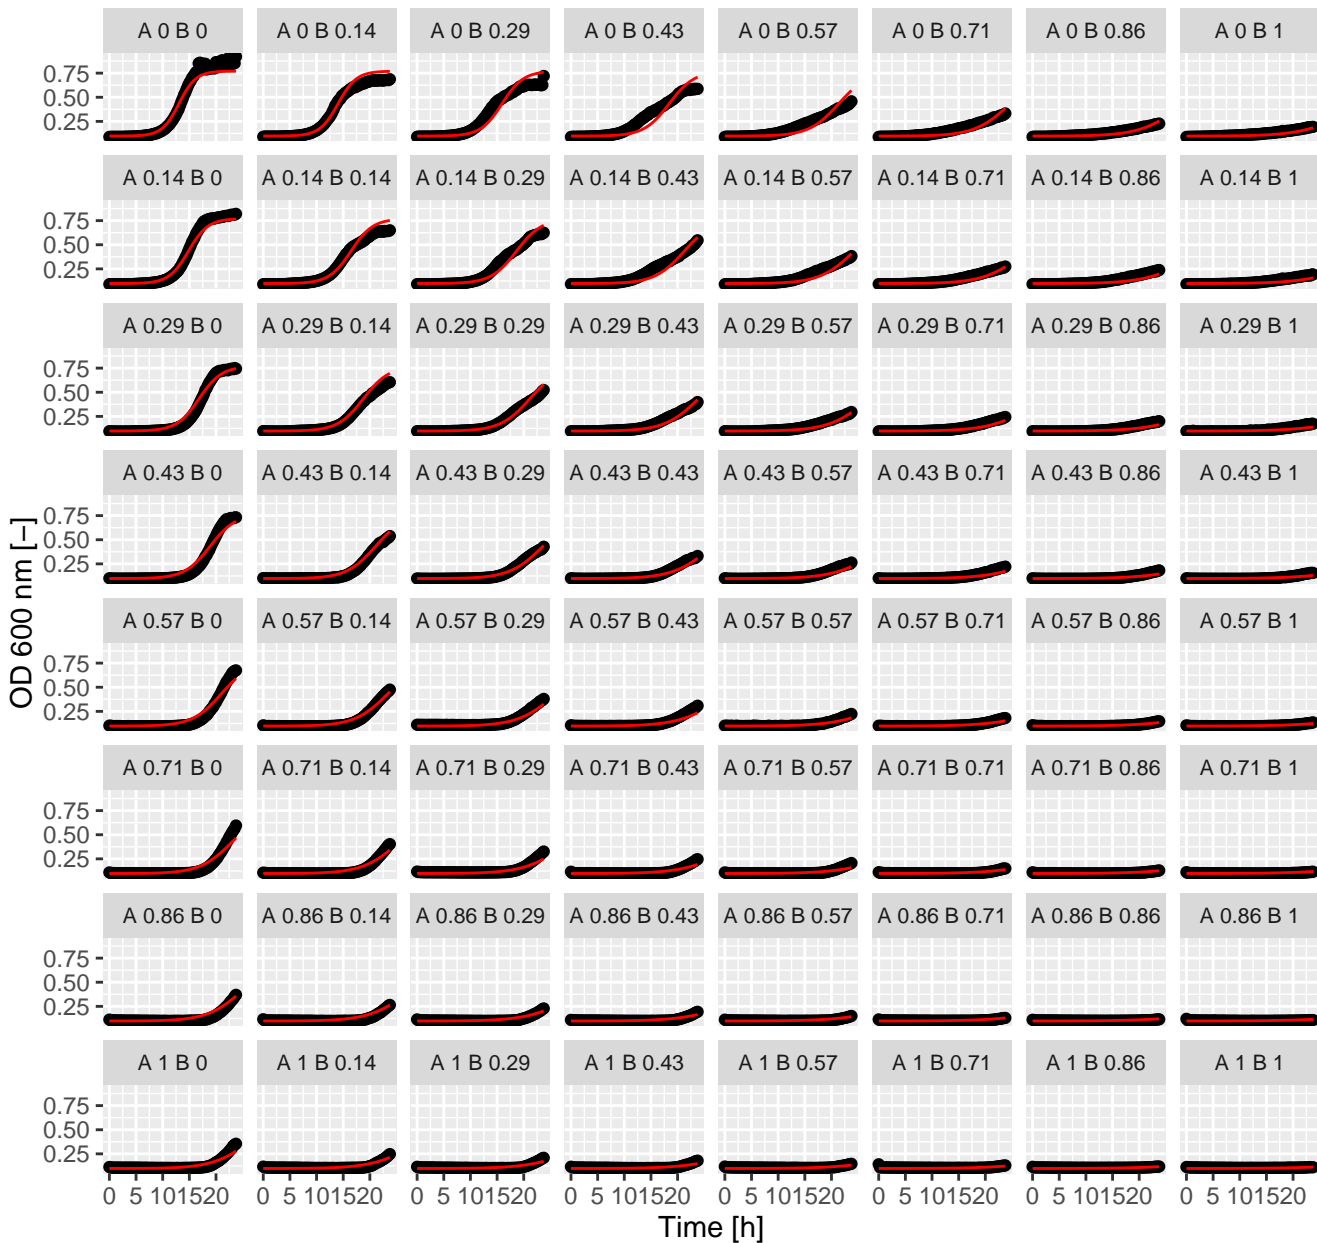

Ben.Met (= Ax.Bx) full GPDI  
Int\_AB = 0 and Int\_BA = 0.18 at EC50

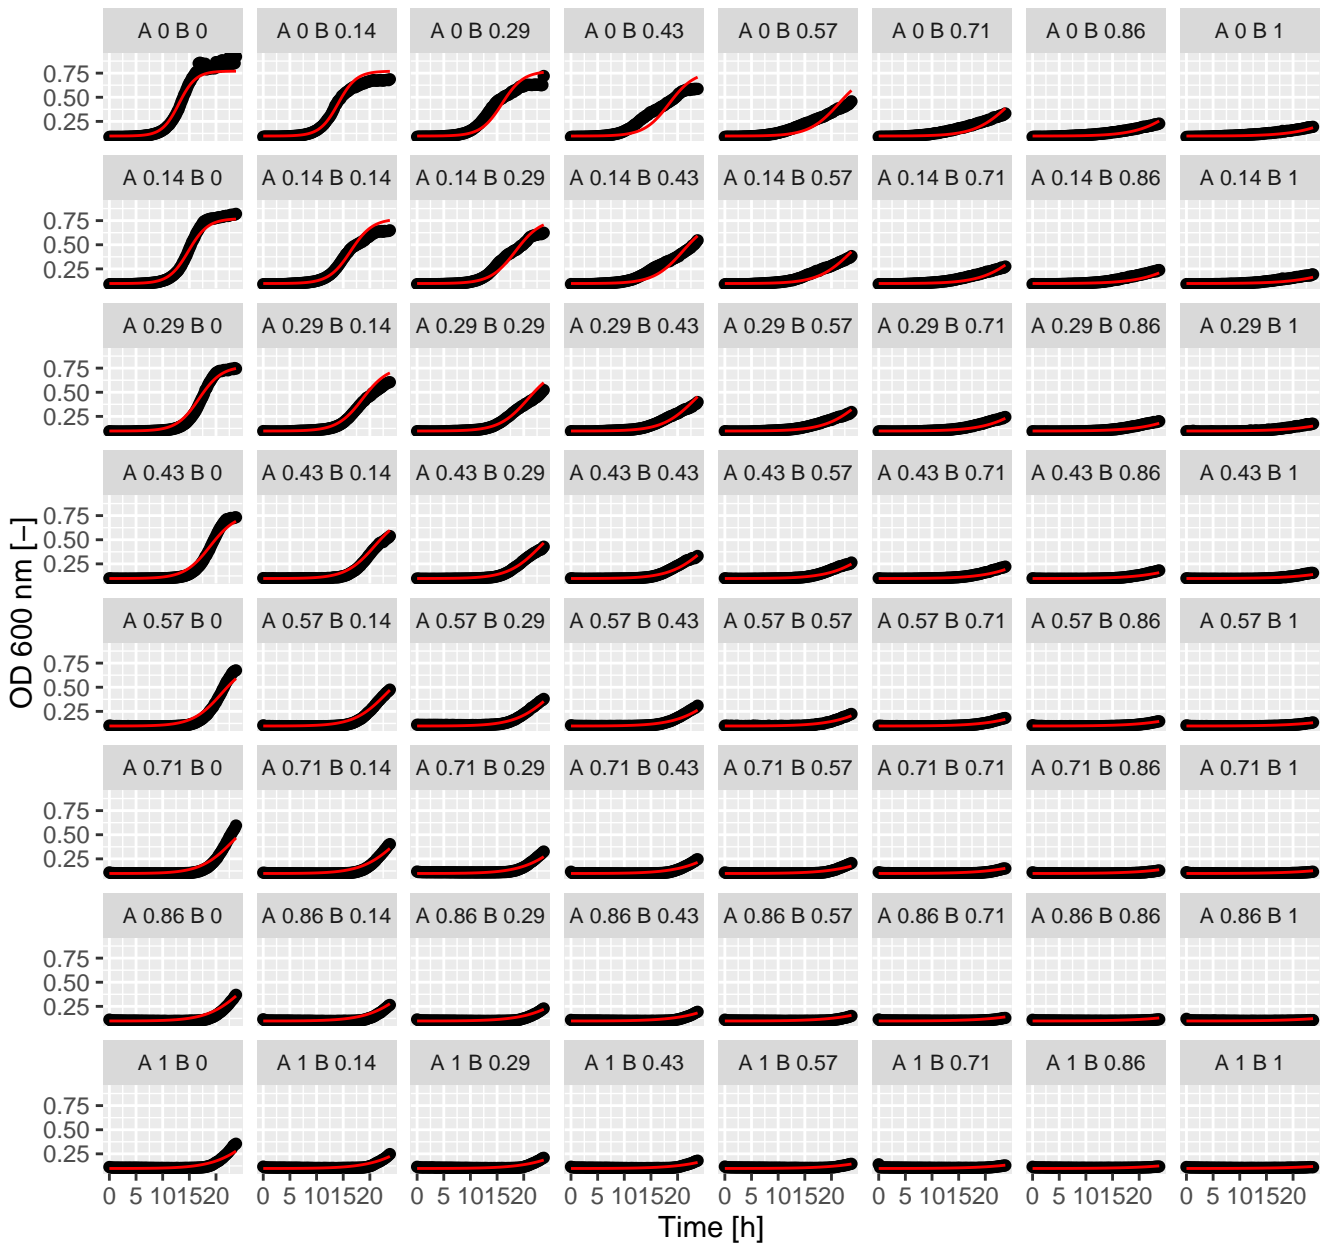

Ben.MMS (= Ax.Bx) exp. additivity (LA)  
Int\_AB = 0 and Int\_BA = 0 at EC50

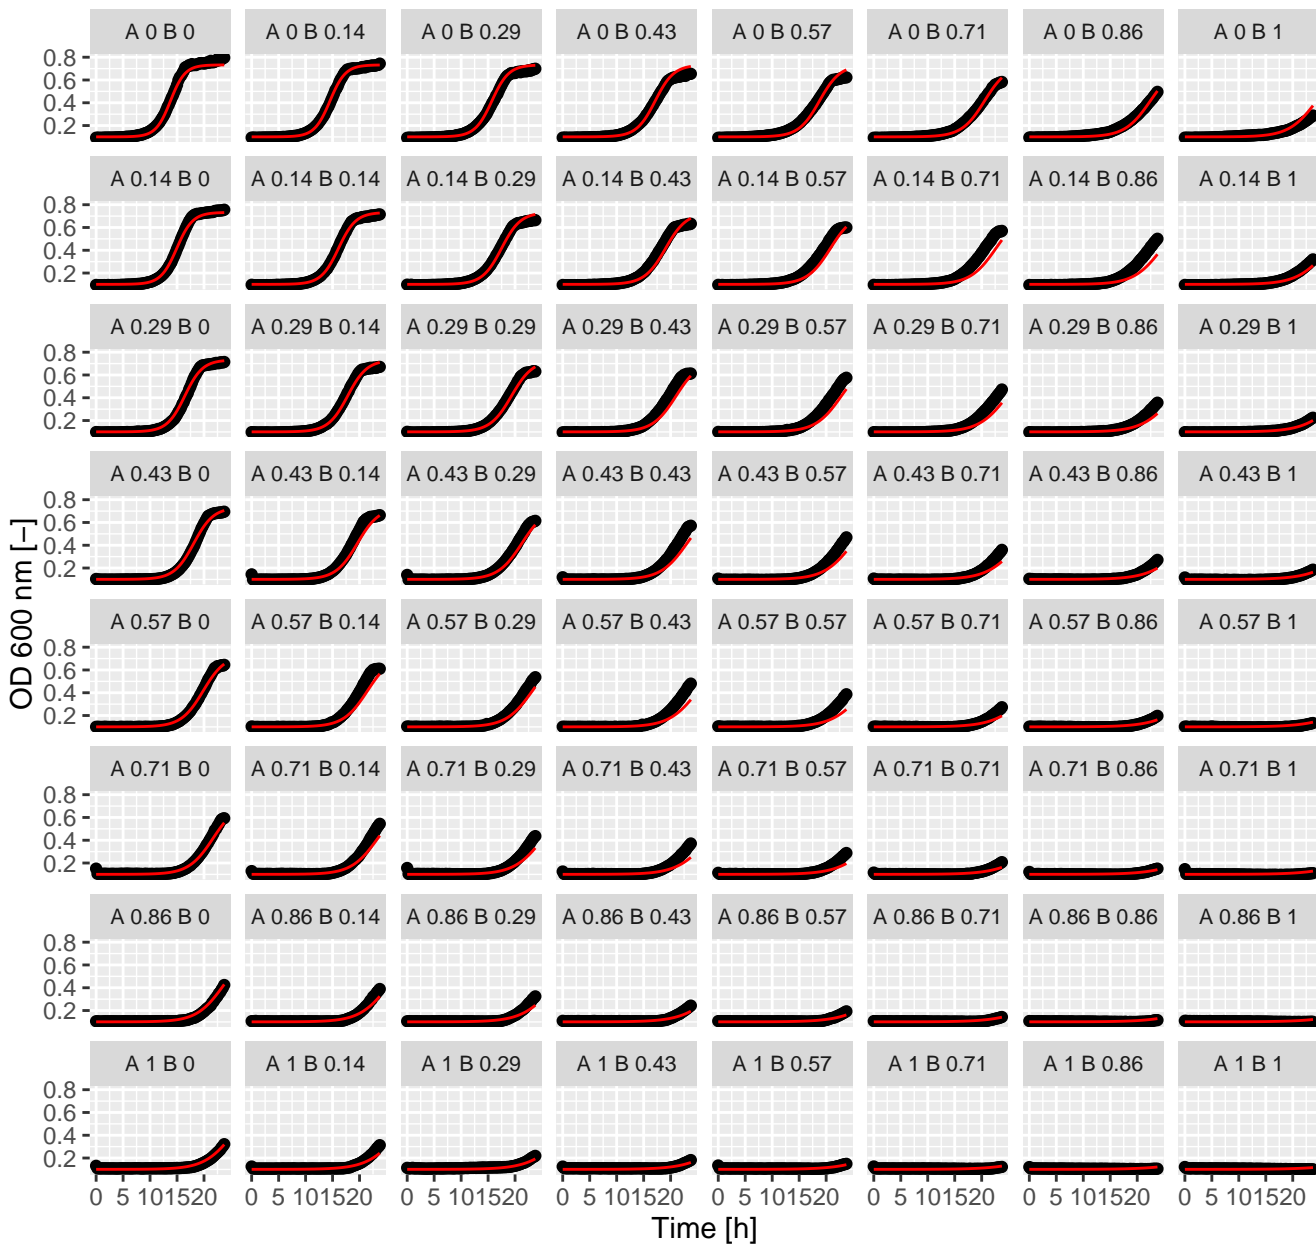

Ben.MMS (= Ax.Bx) full GPDI  
Int\_AB = 0.12 and Int\_BA = 0.17 at EC50

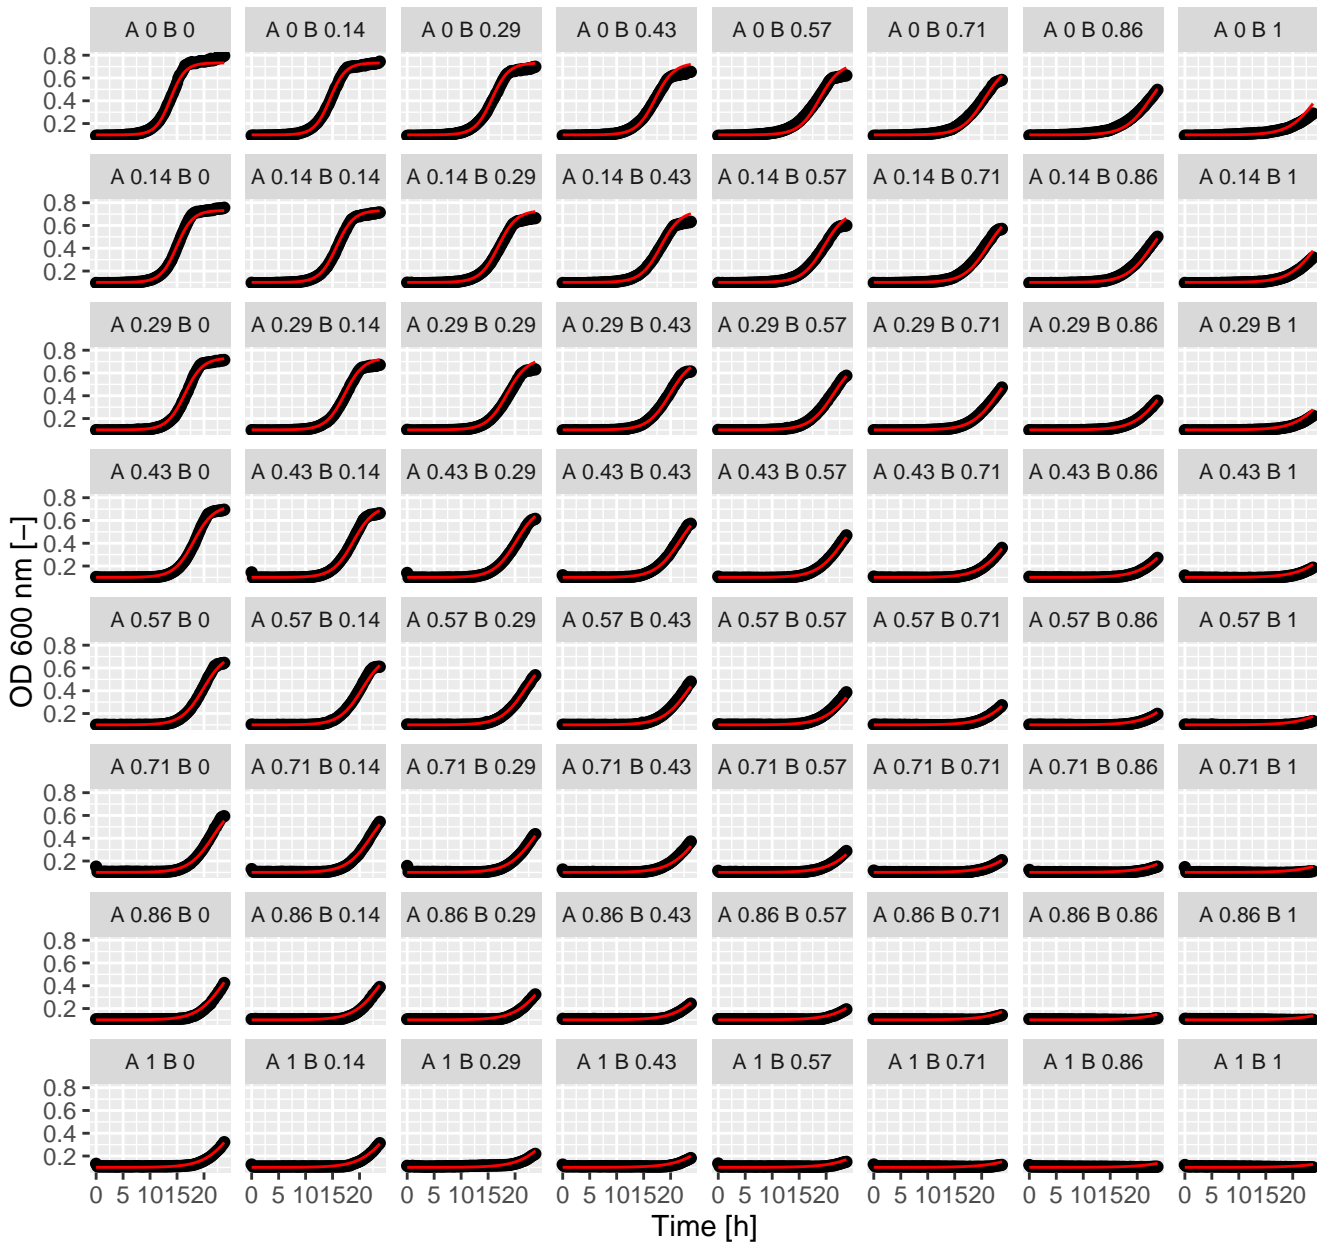



Ben.Myr (= Ax.Bx) exp. additivity (LA)  
Int\_AB = 0 and Int\_BA = 0 at EC50

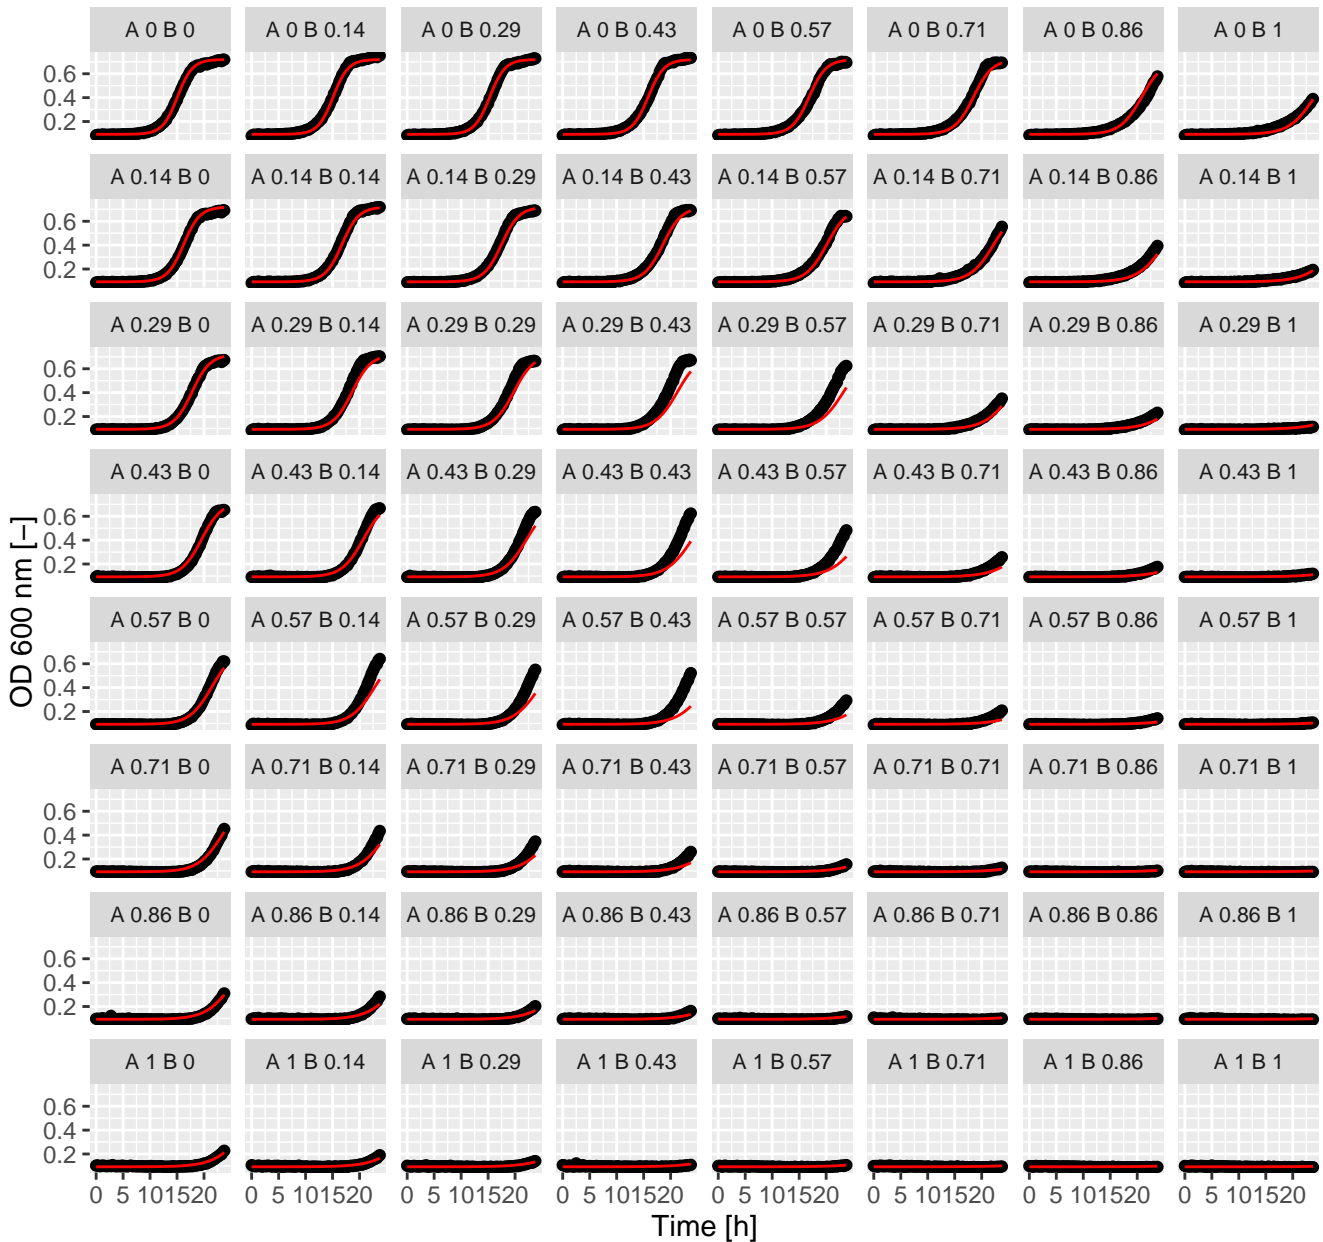

Ben.Myr (= Ax.Bx) full GPDI  
Int\_AB = 1.35 and Int\_BA = -0.26 at EC50

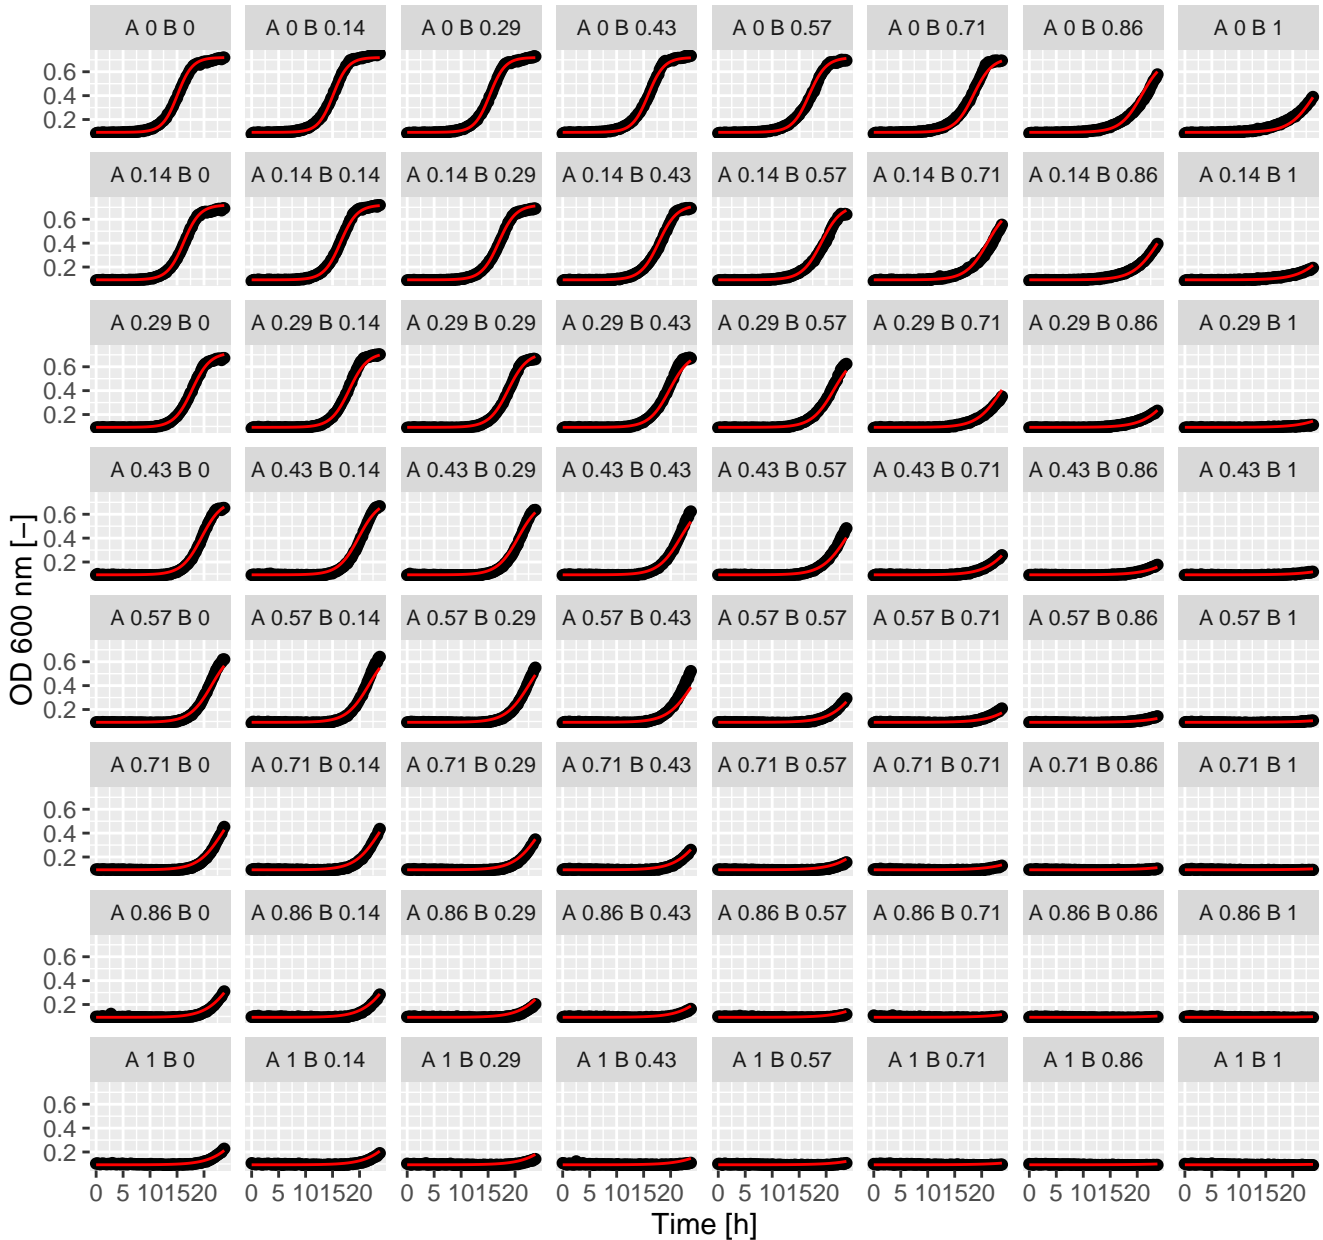

Ben.Pen (= Ax.Bx) exp. additivity (LA)  
Int\_AB = 0 and Int\_BA = 0 at EC50

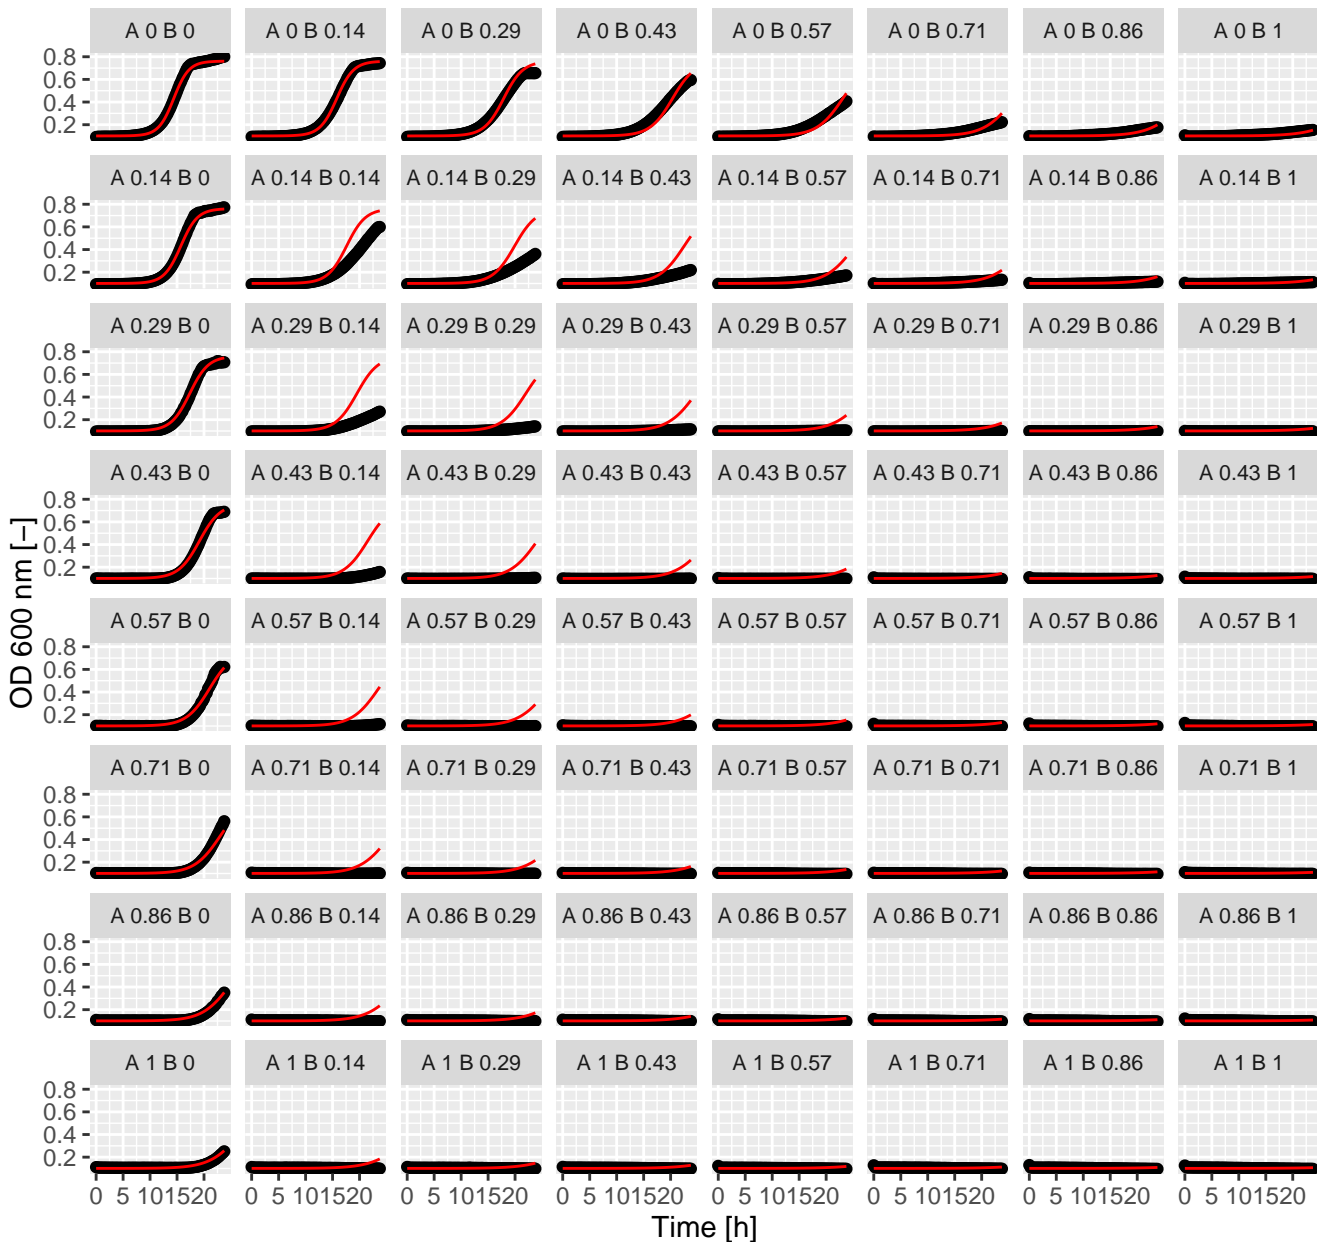

Ben.Pen (= Ax.Bx) full GPDI  
Int\_AB = -0.52 and Int\_BA = -0.72 at EC50

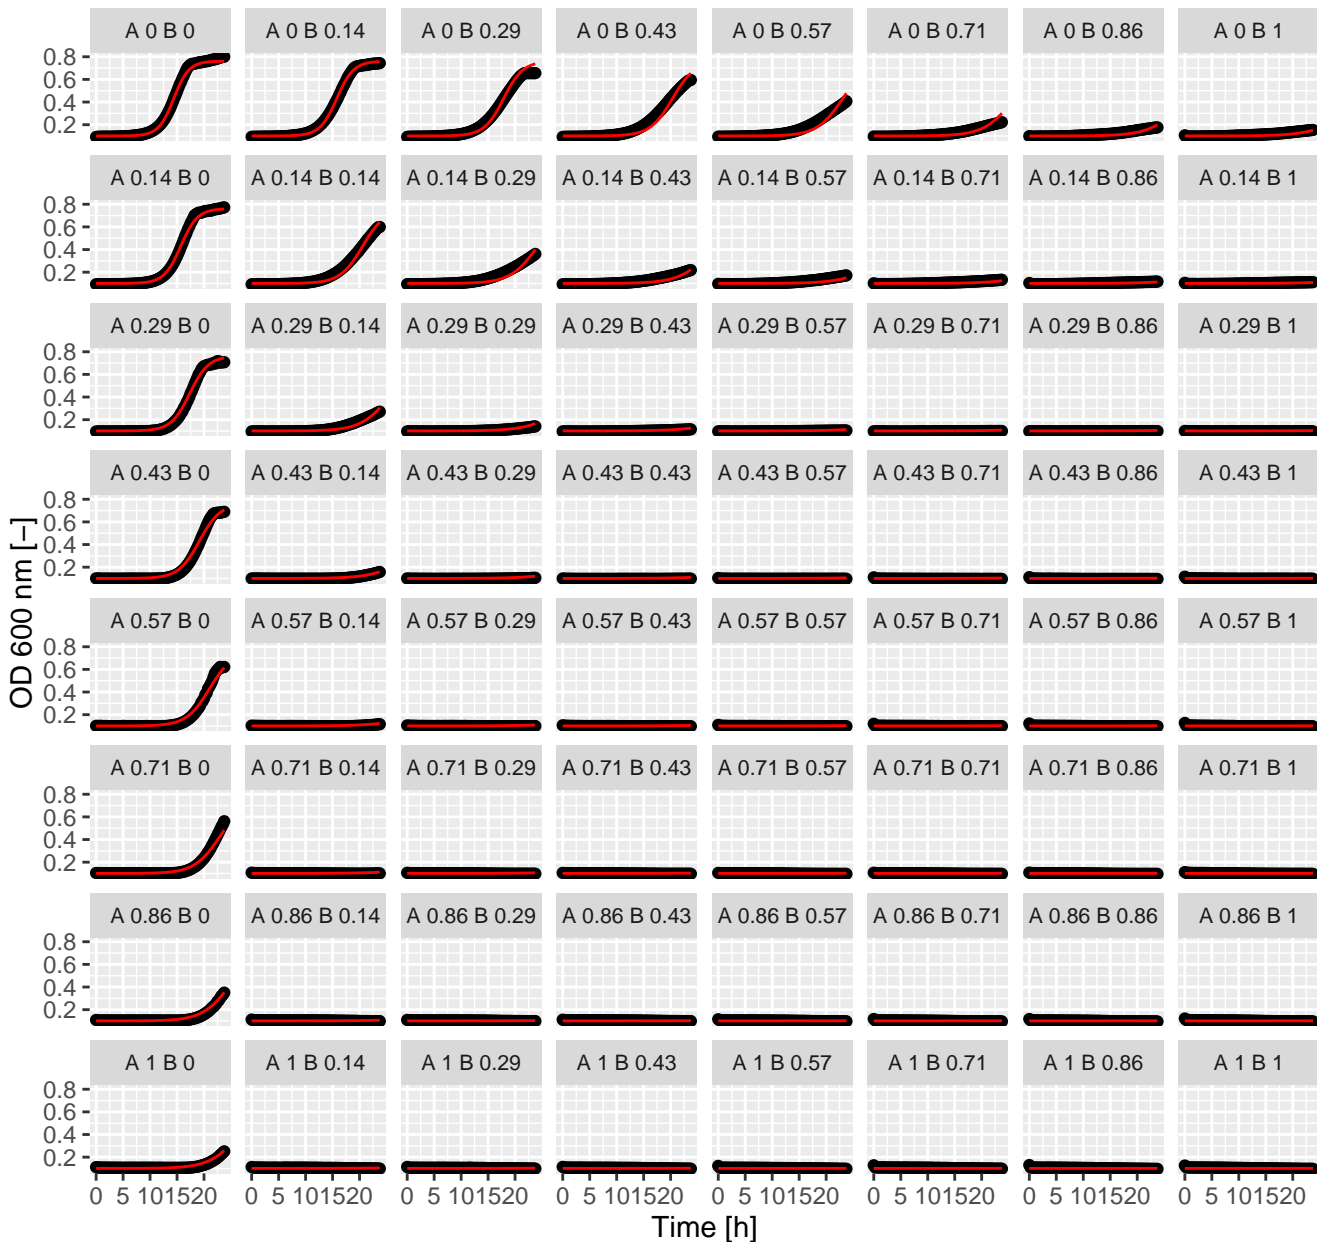

Ben.Qmy (= Ax.Bx) exp. additivity (LA)  
Int\_AB = 0 and Int\_BA = 0 at EC50

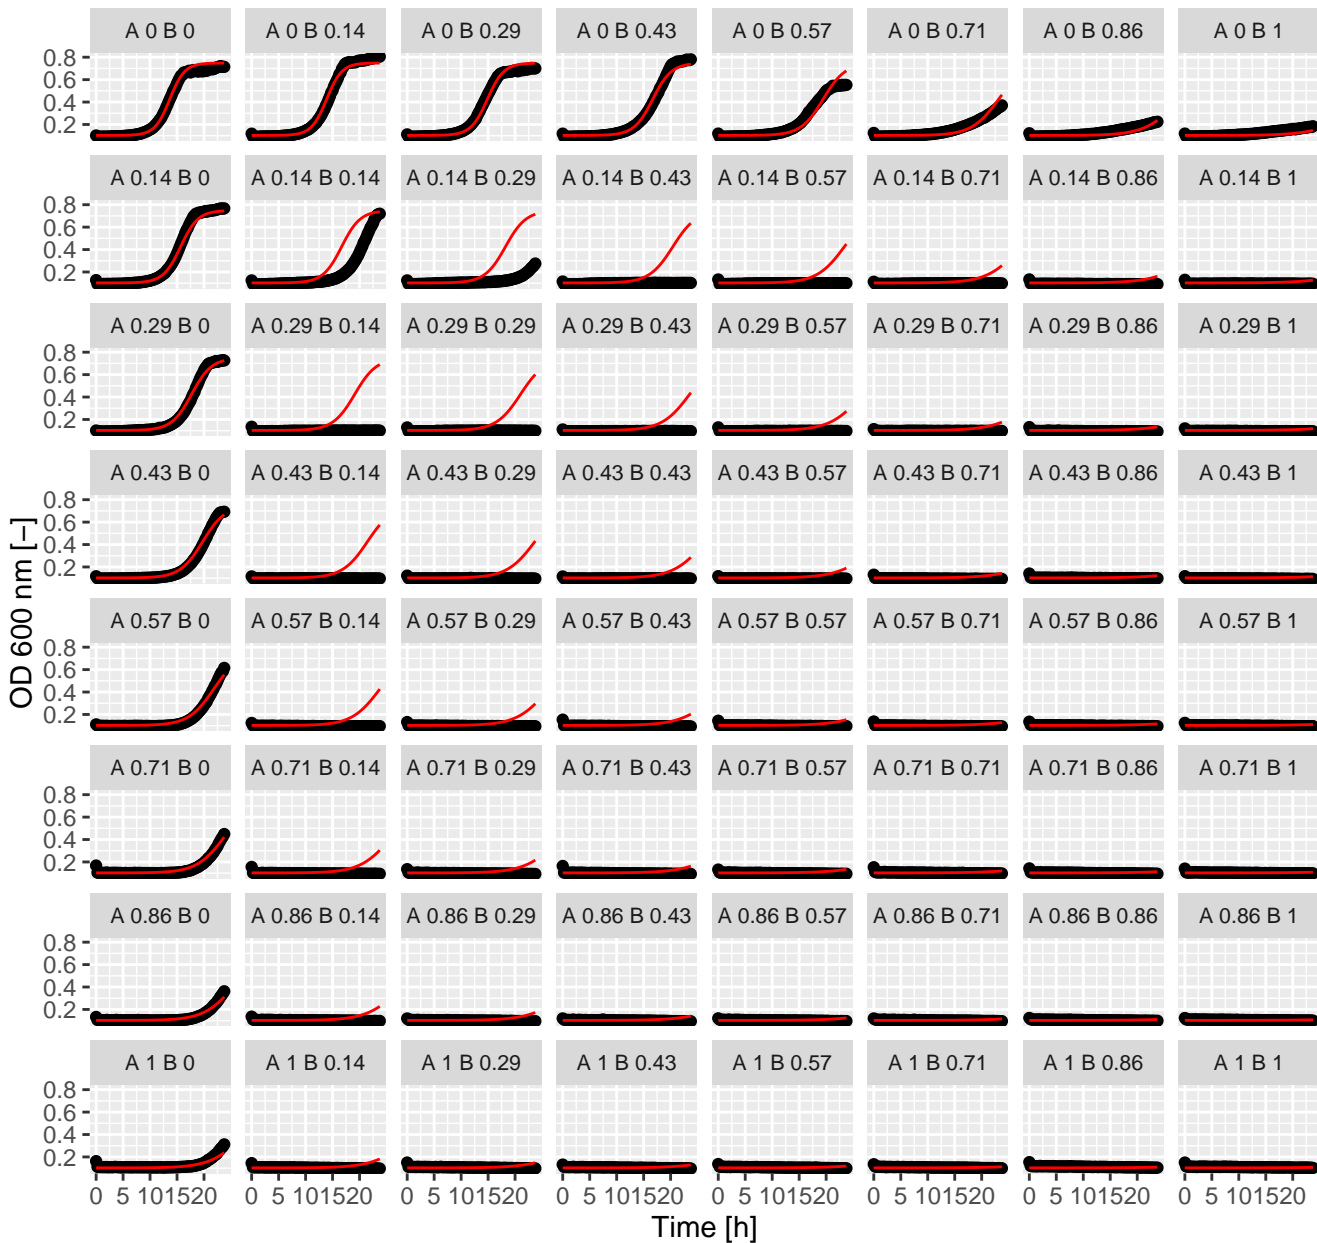

Ben.Qmy (= Ax.Bx) full GPDI  
Int\_AB = -0.25 and Int\_BA = -0.9 at EC50

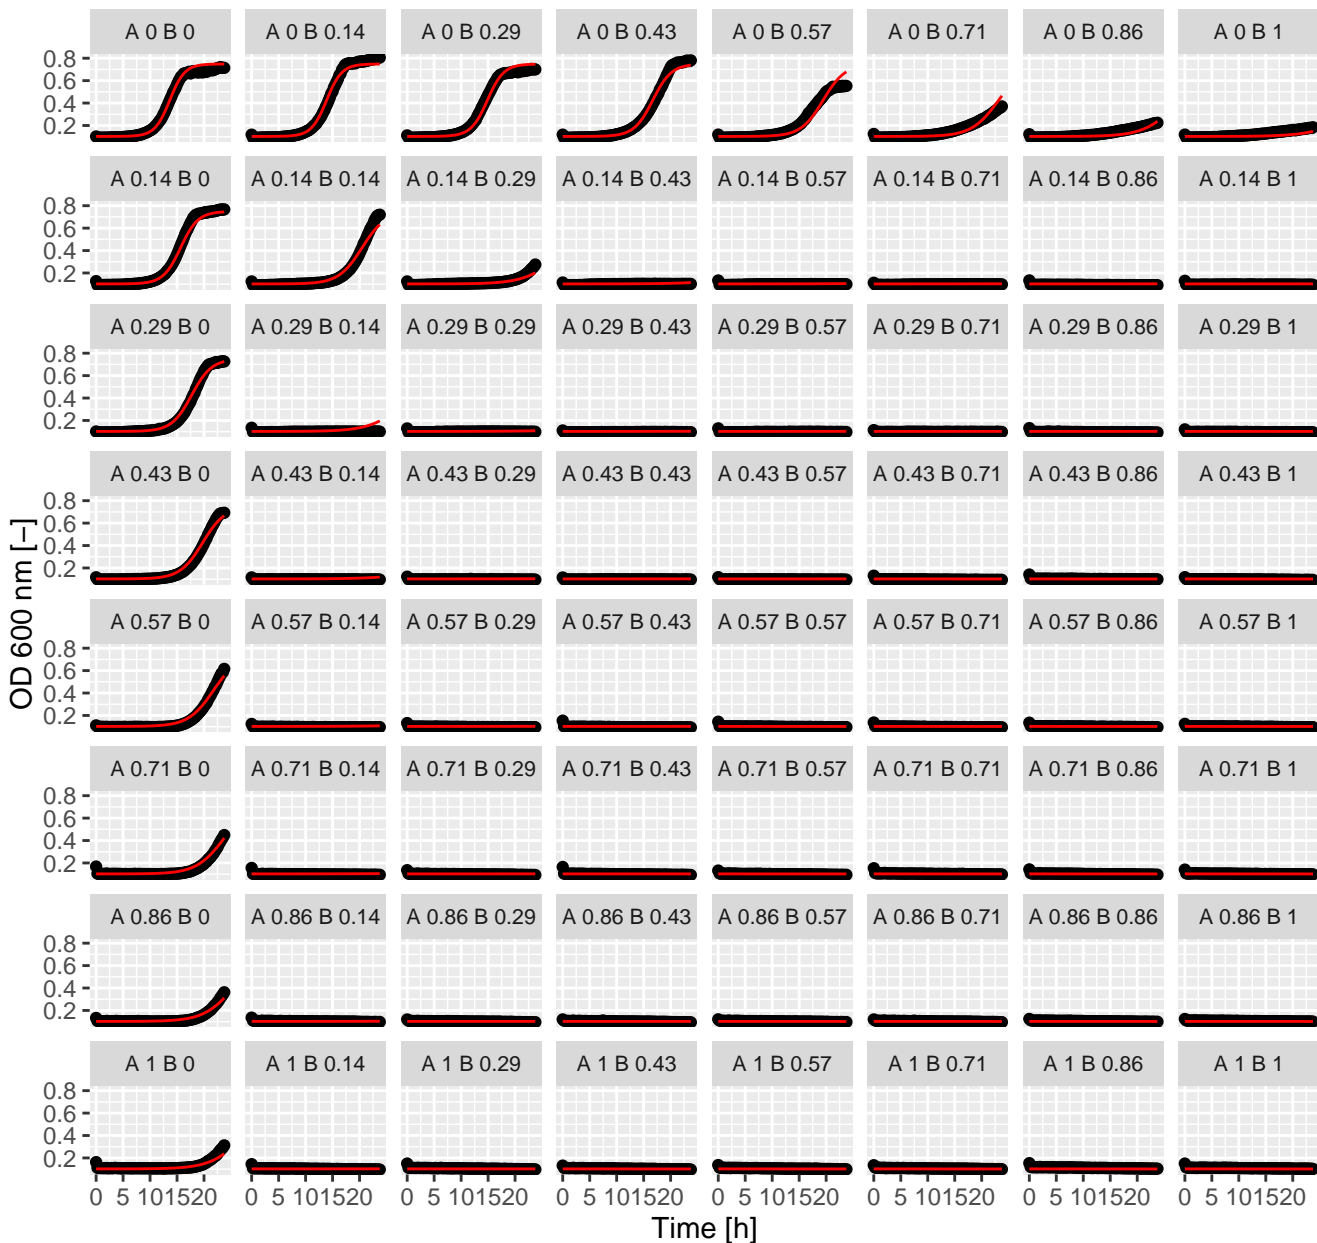

Ben.Rad (= Ax.Bx) exp. additivity (LA)  
Int\_AB = 0 and Int\_BA = 0 at EC50

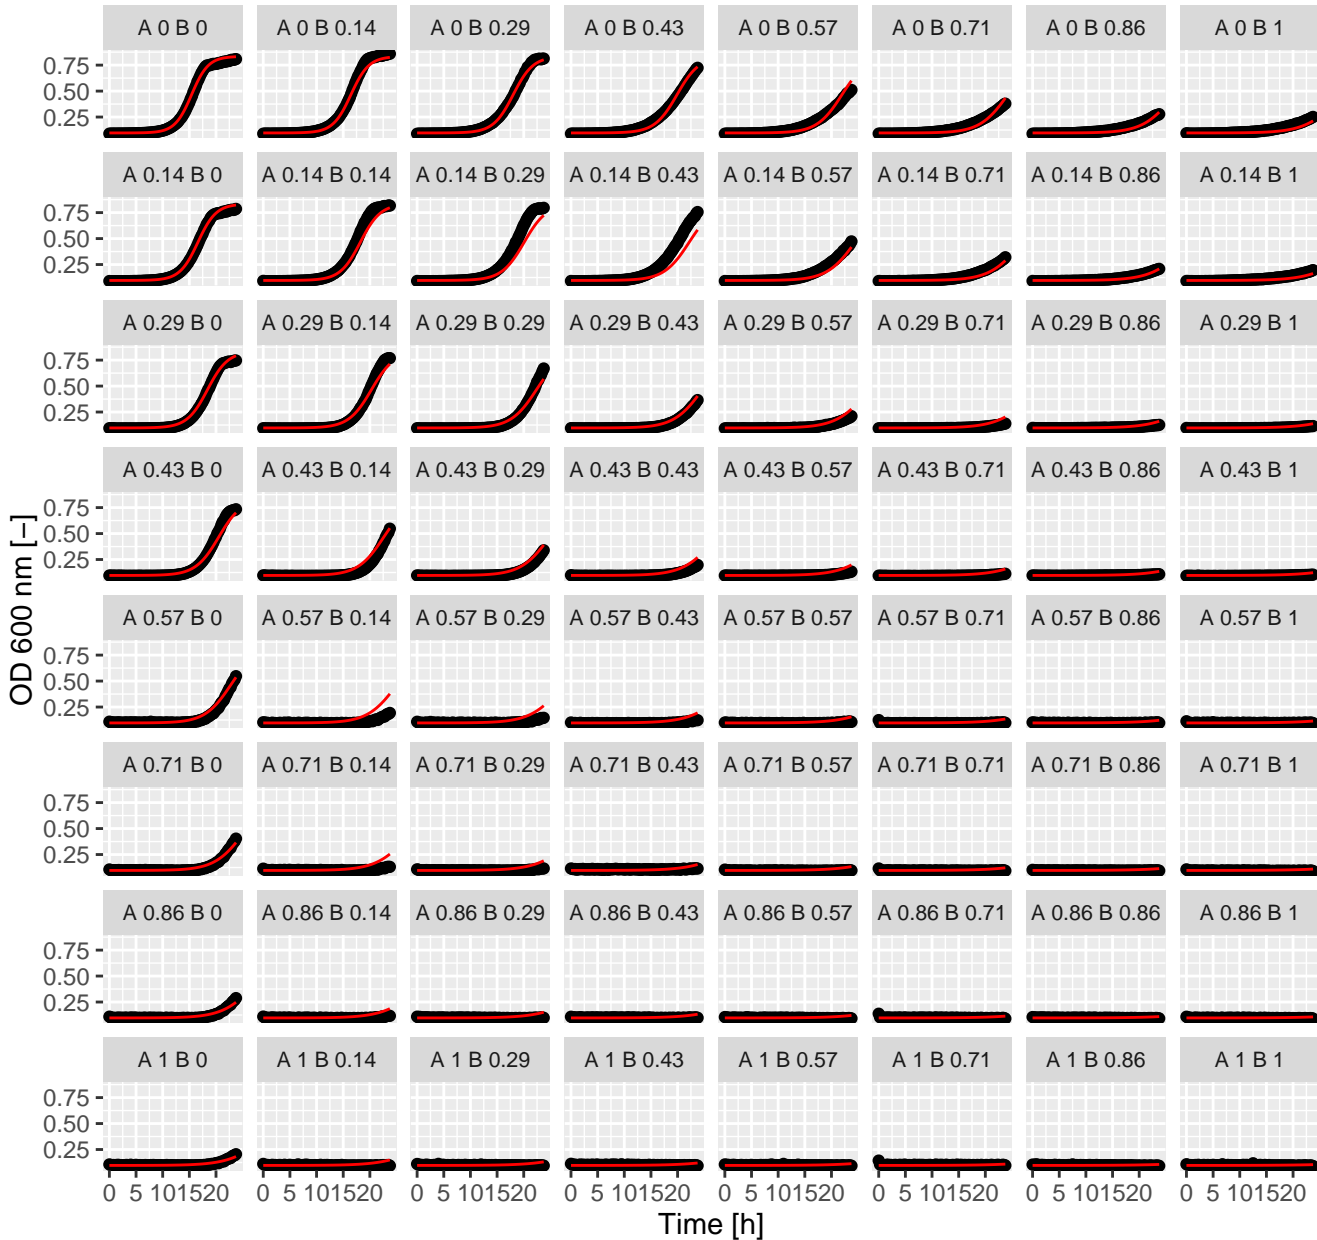

Ben.Rad (= Ax.Bx) full GPDI  
Int\_AB = 0 and Int\_BA = -0.15 at EC50

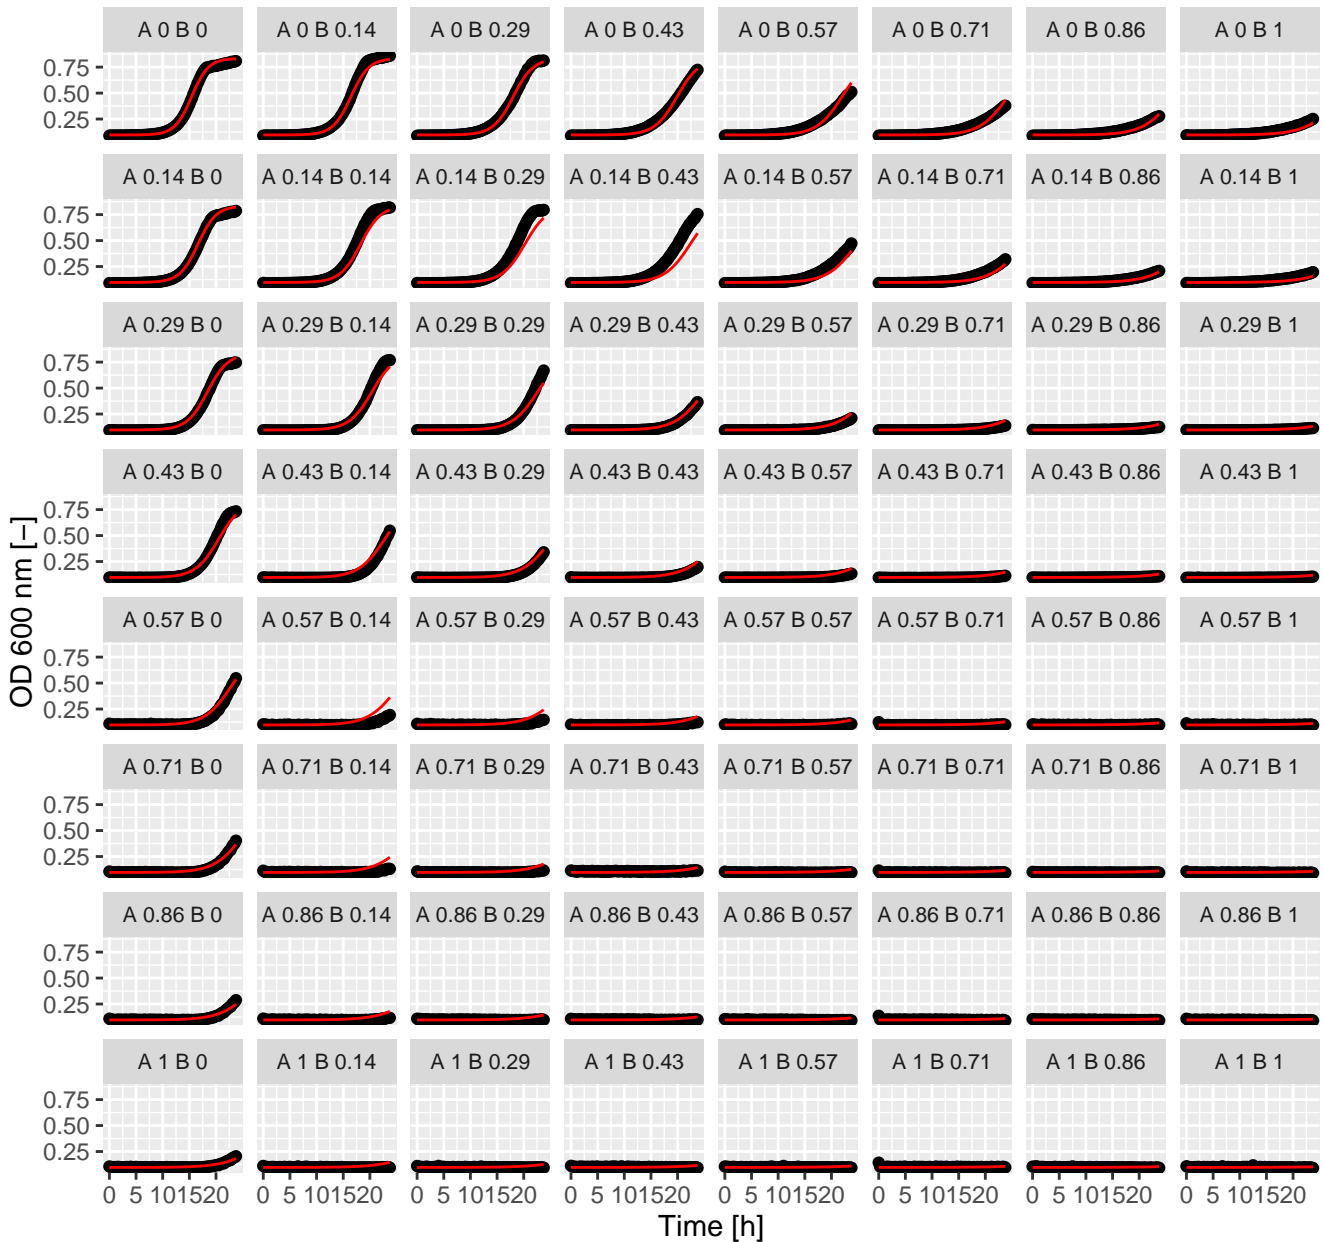



Ben.Rap (= Ax.Bx) exp. additivity (LA)  
Int\_AB = 0 and Int\_BA = 0 at EC50

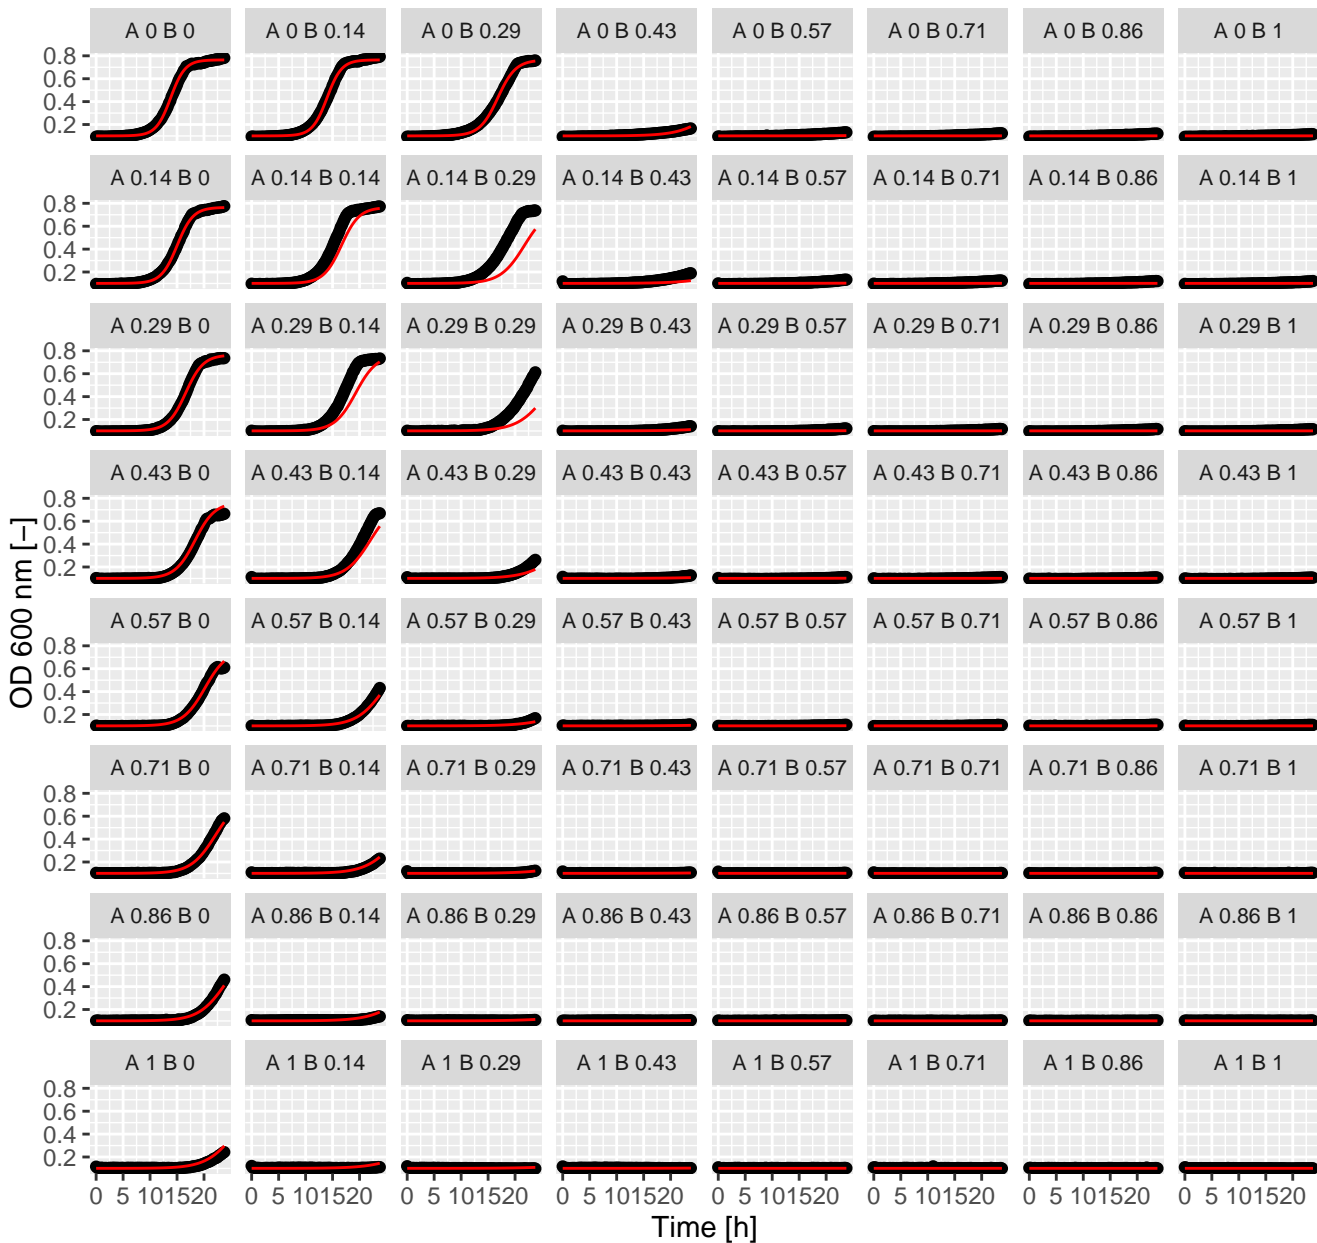

Ben.Rap (= Ax.Bx) full GPD1  
Int\_AB = 0.07 and Int\_BA = 0.25 at EC50

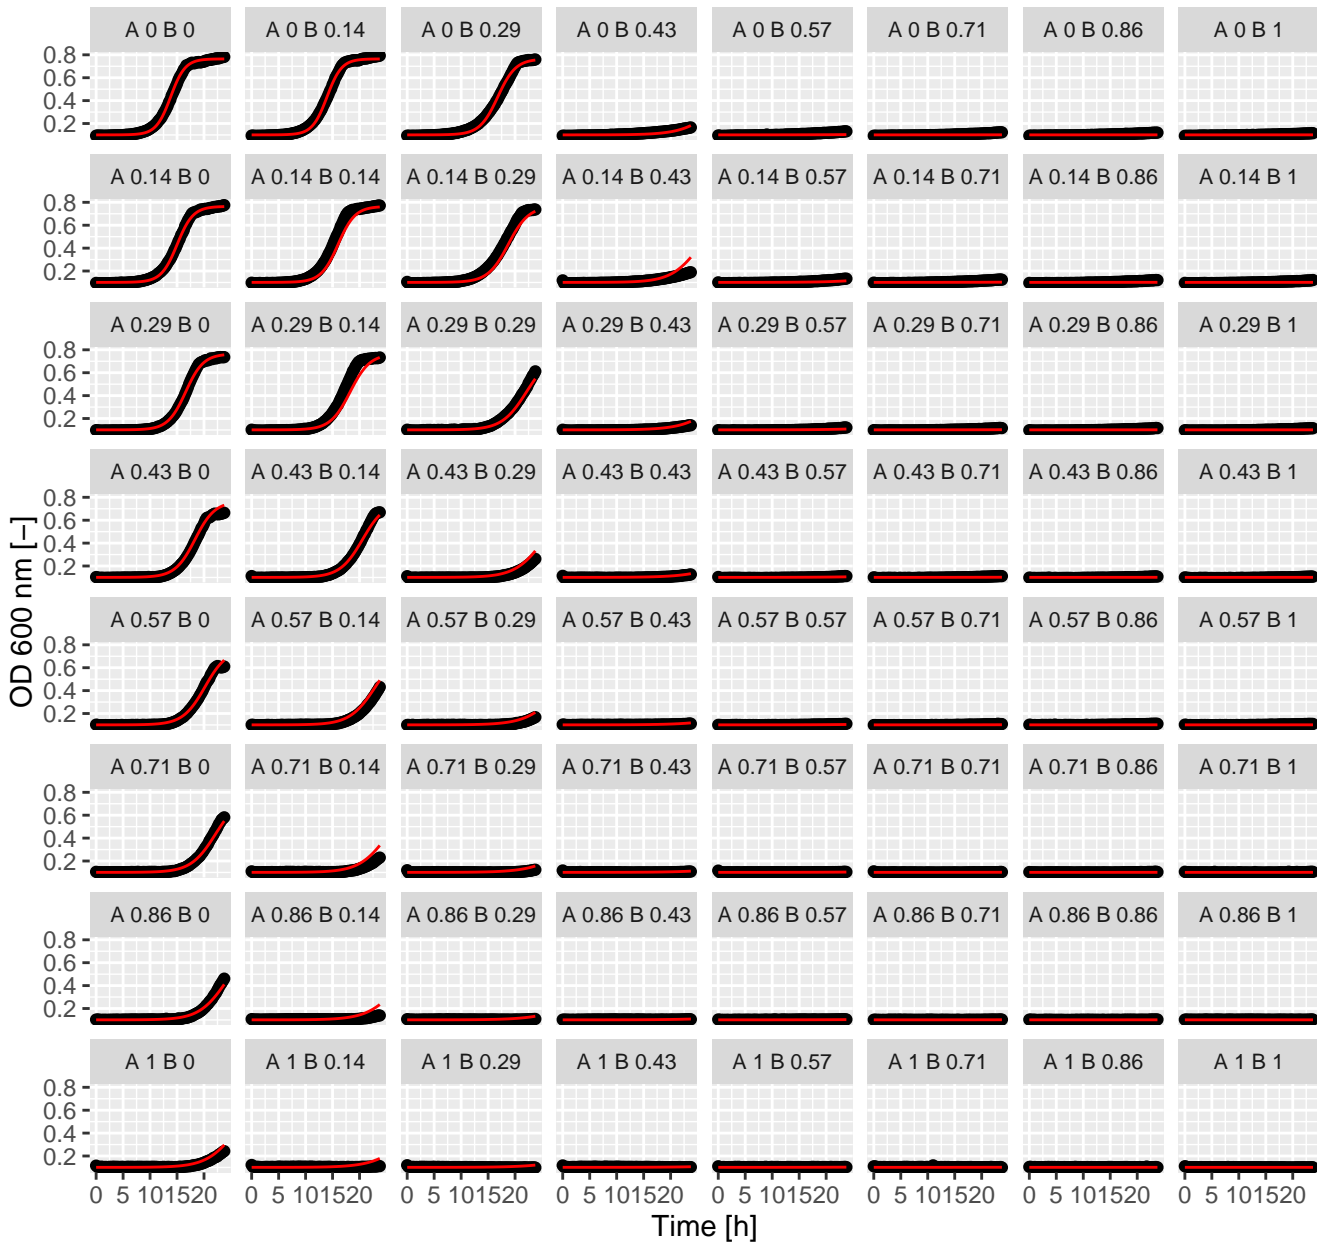

Ben.Sta (= Ax.Bx) exp. additivity (LA)  
Int\_AB = 0 and Int\_BA = 0 at EC50

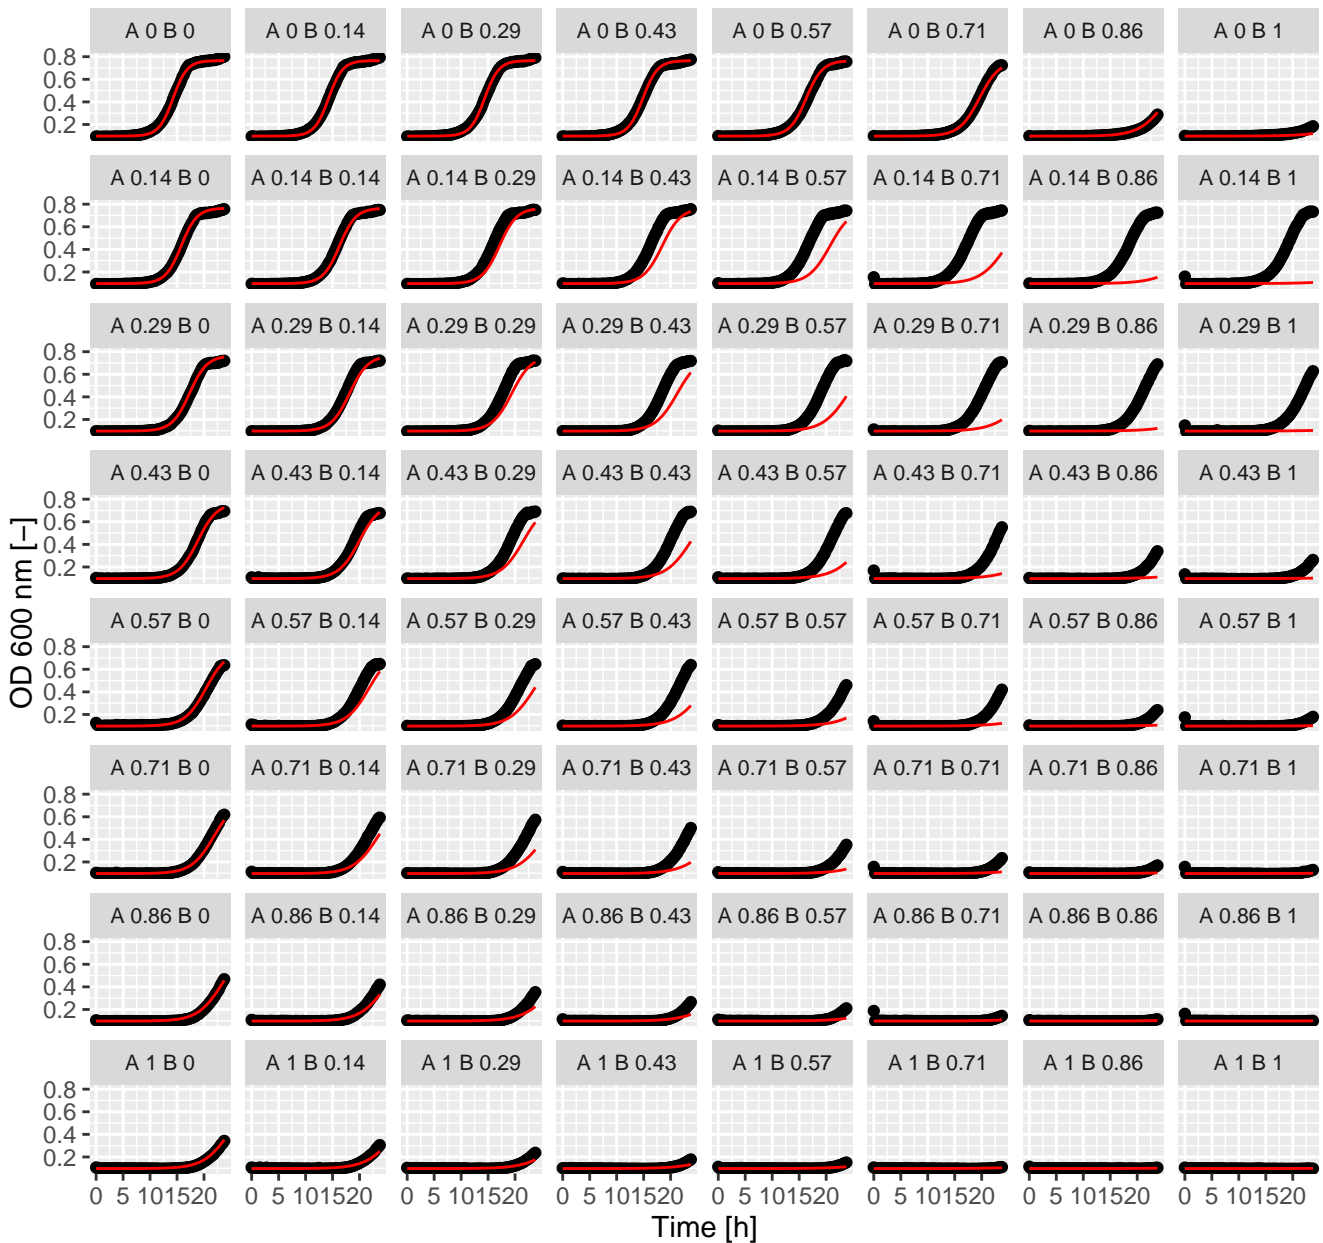

Ben.Sta (= Ax.Bx) full GPDI  
Int\_AB = 0.09 and Int\_BA = 0.92 at EC50

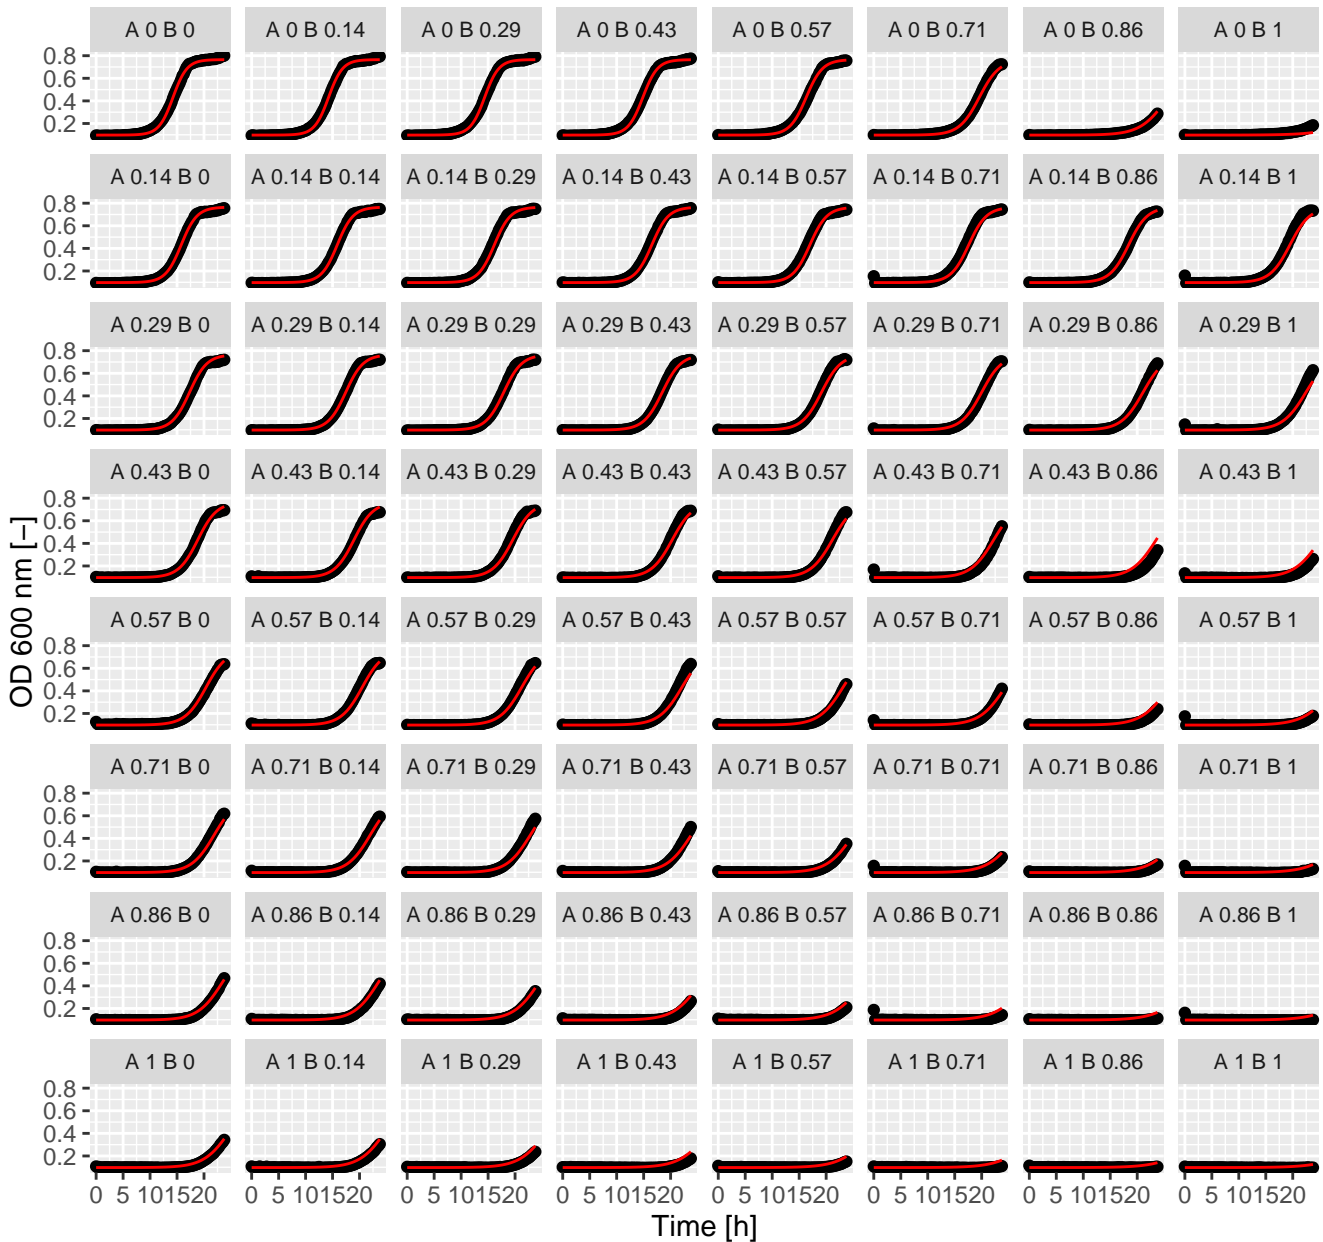

Ben.Tac (= Ax.Bx) exp. additivity (LA)  
Int\_AB = 0 and Int\_BA = 0 at EC50

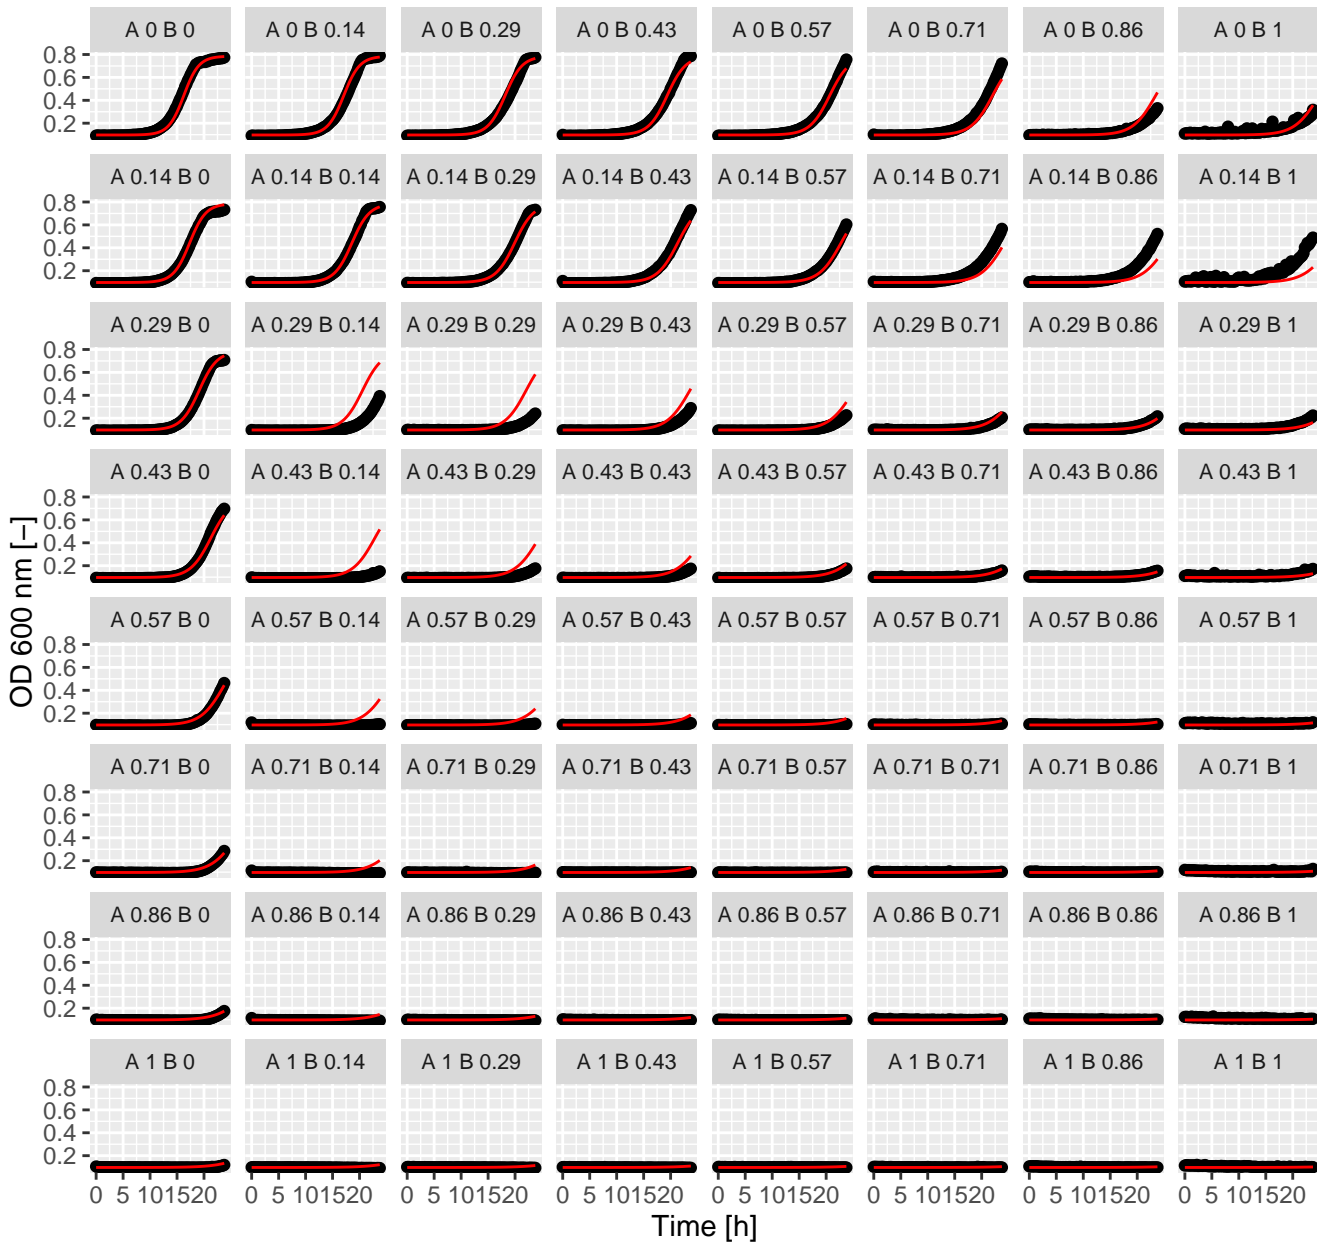

Ben.Tac (= Ax.Bx) full GPDI  
 Int\_AB = -0.6 and Int\_BA = 2.91 at EC50

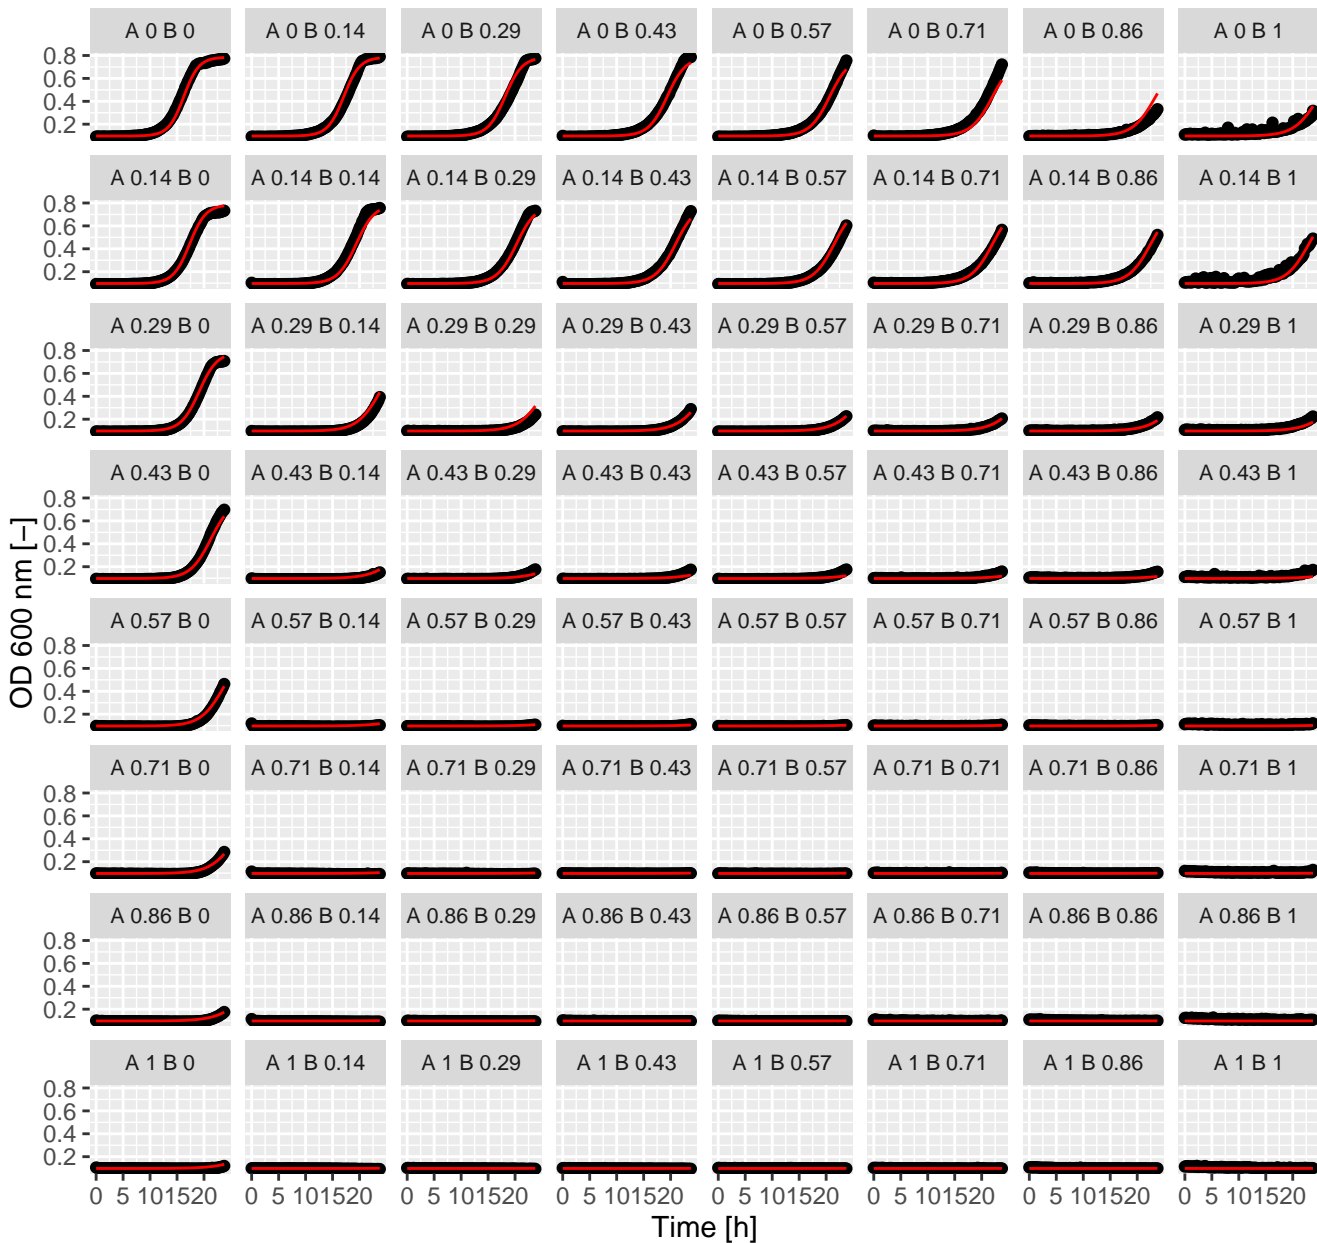

Ben.Ter (= Ax.Bx) exp. additivity (LA)  
Int\_AB = 0 and Int\_BA = 0 at EC50

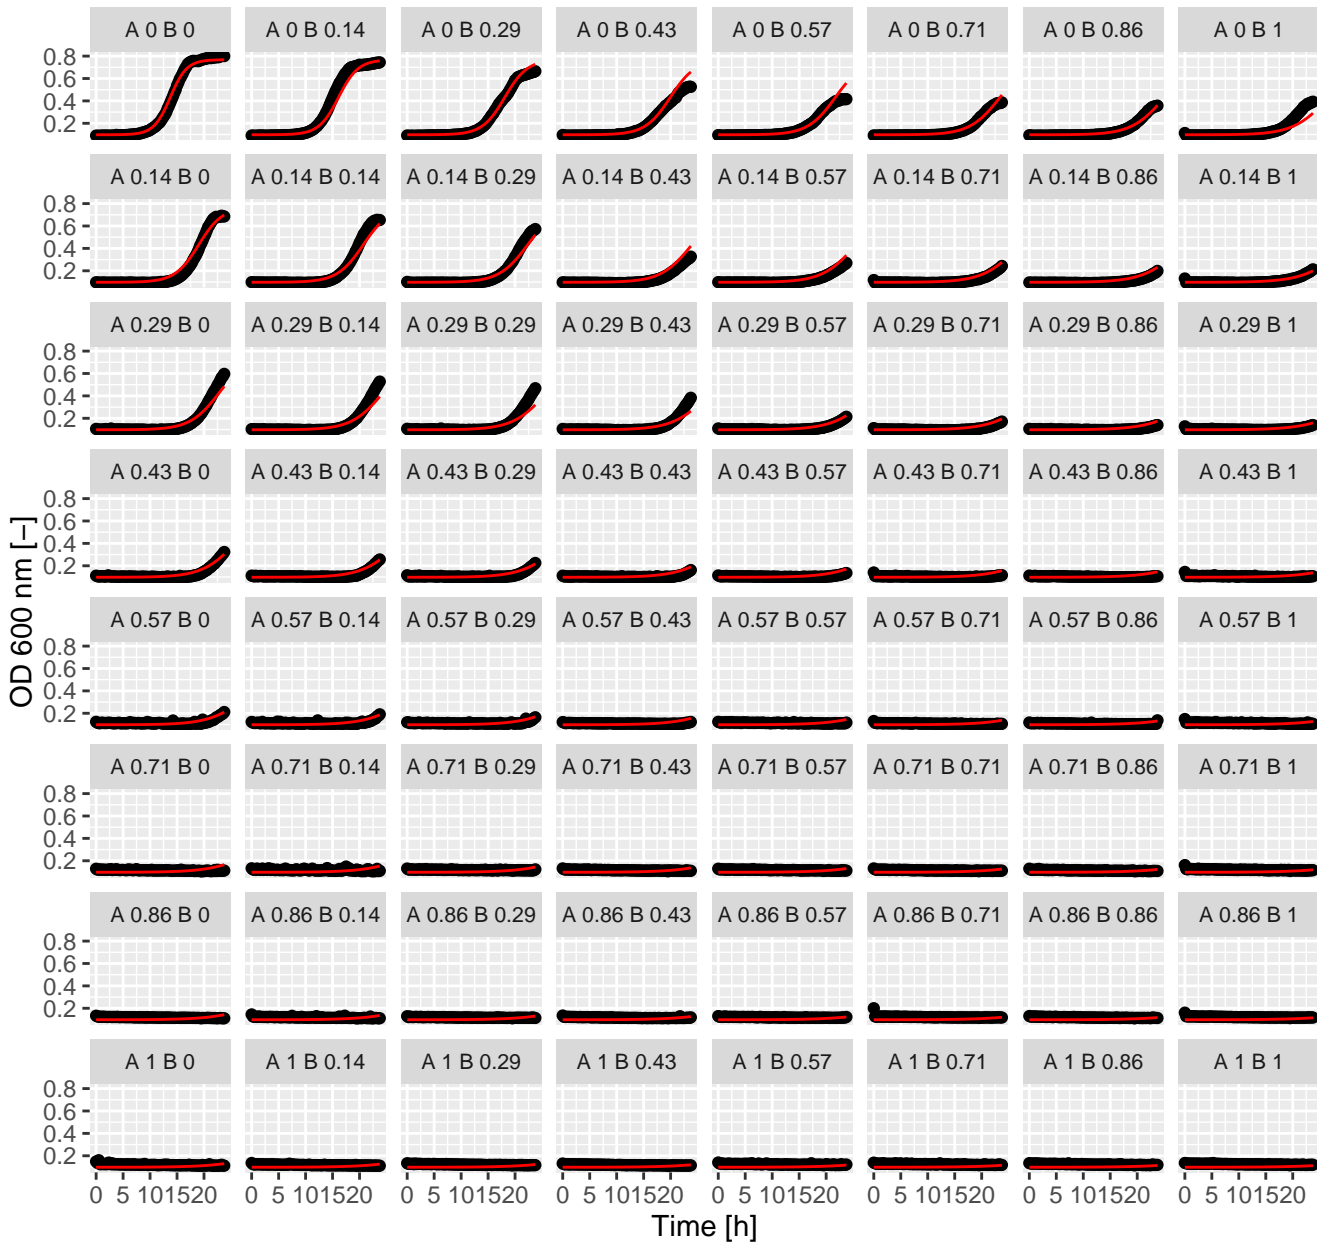

Ben.Ter (= Ax.Bx) full GPDI  
Int\_AB = 0 and Int\_BA = -0.13 at EC50

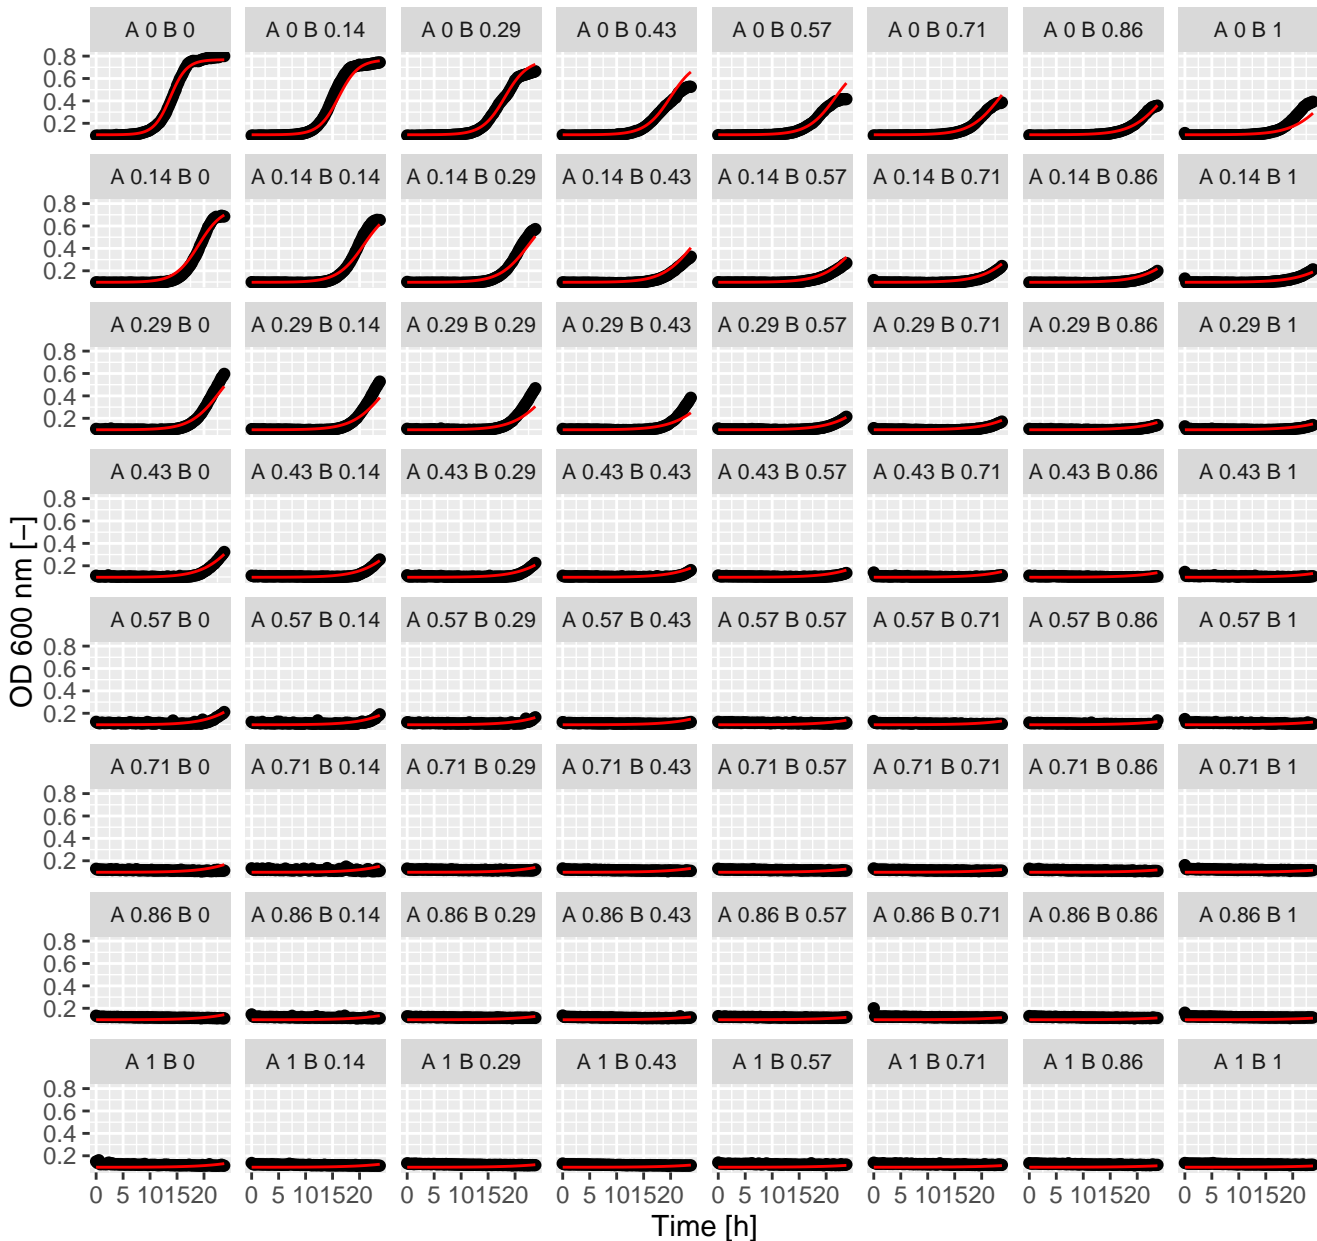



Ben.Tun (= Ax.Bx) exp. additivity (LA)  
Int\_AB = 0 and Int\_BA = 0 at EC50

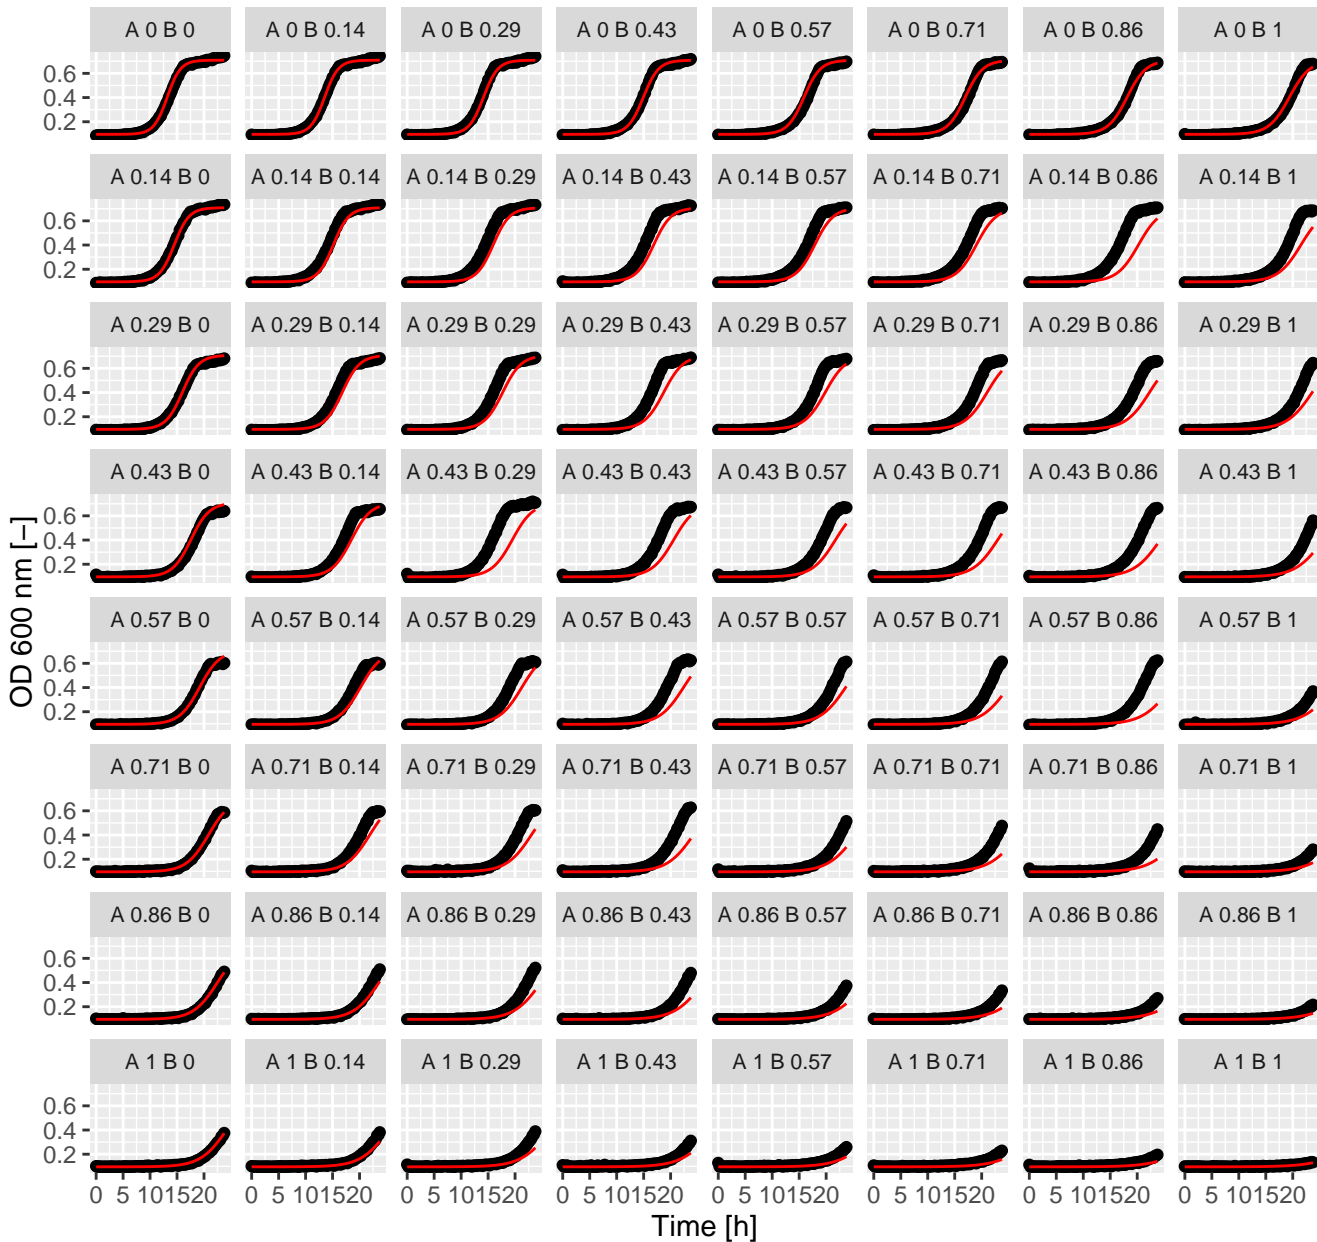

Ben.Tun (= Ax.Bx) full GPDI  
Int\_AB = 0.25 and Int\_BA = 0.5 at EC50

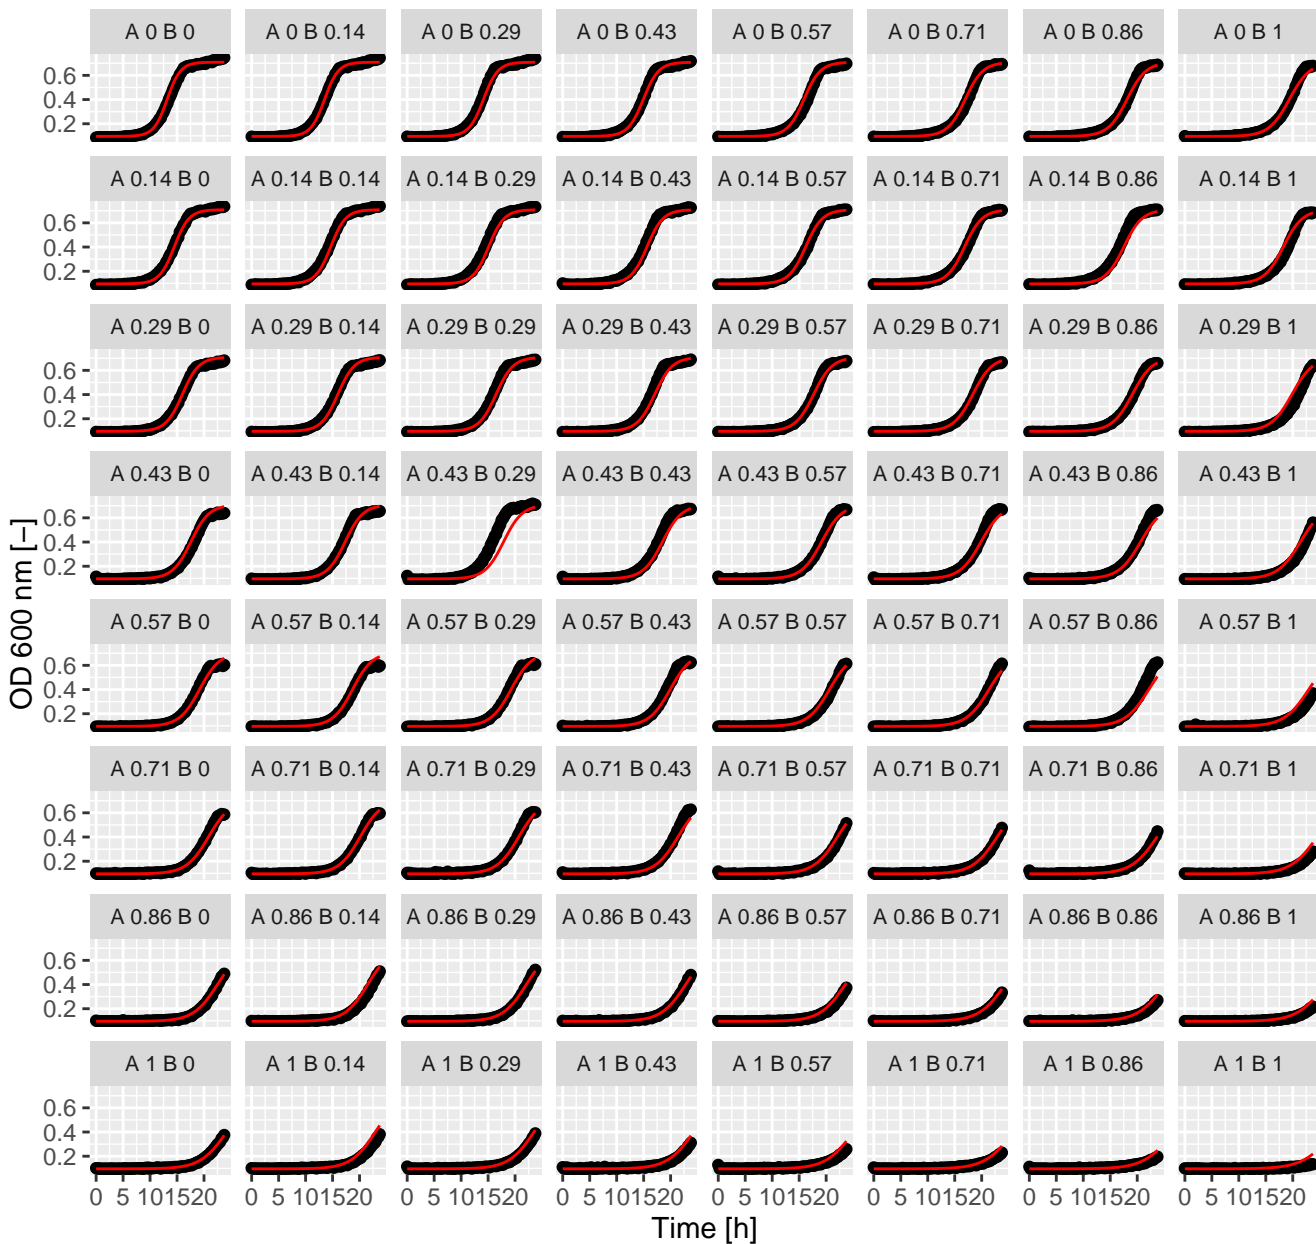

Bro.Bro (= Ax.Bx) exp. additivity (LA)  
 Int\_AB = 0 and Int\_BA = 0 at EC50

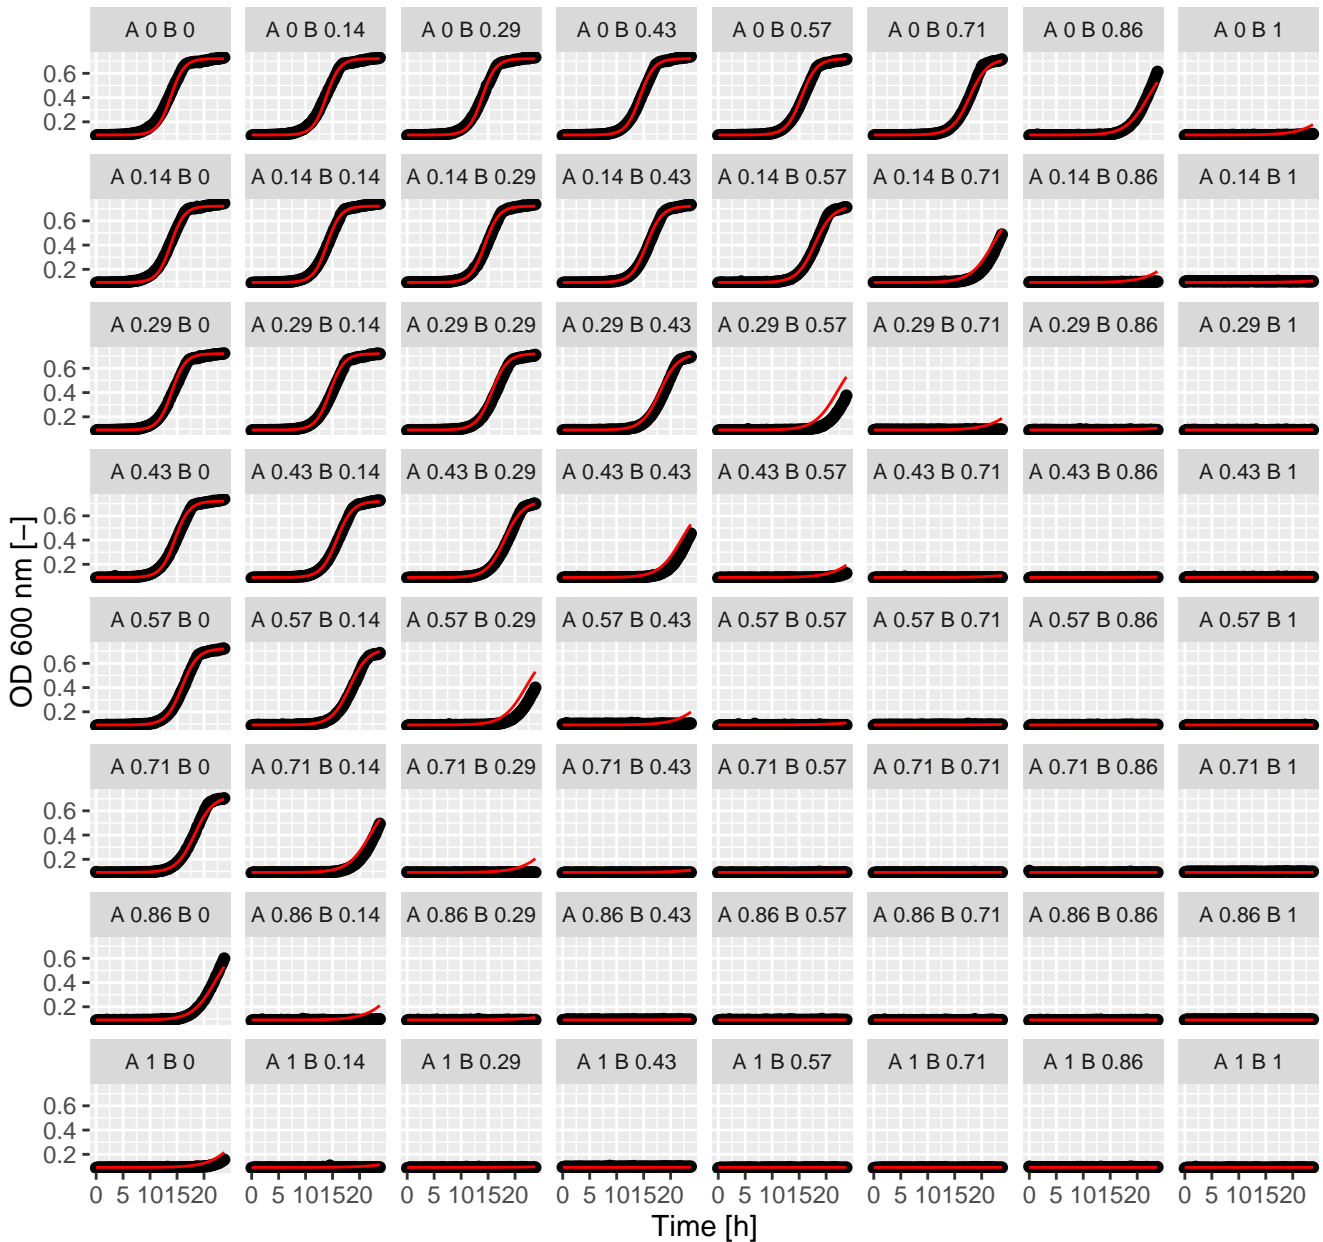

Bro.Bro (= Ax.Bx) full GPDI  
 Int\_AB = 0.05 and Int\_BA = -0.26 at EC50

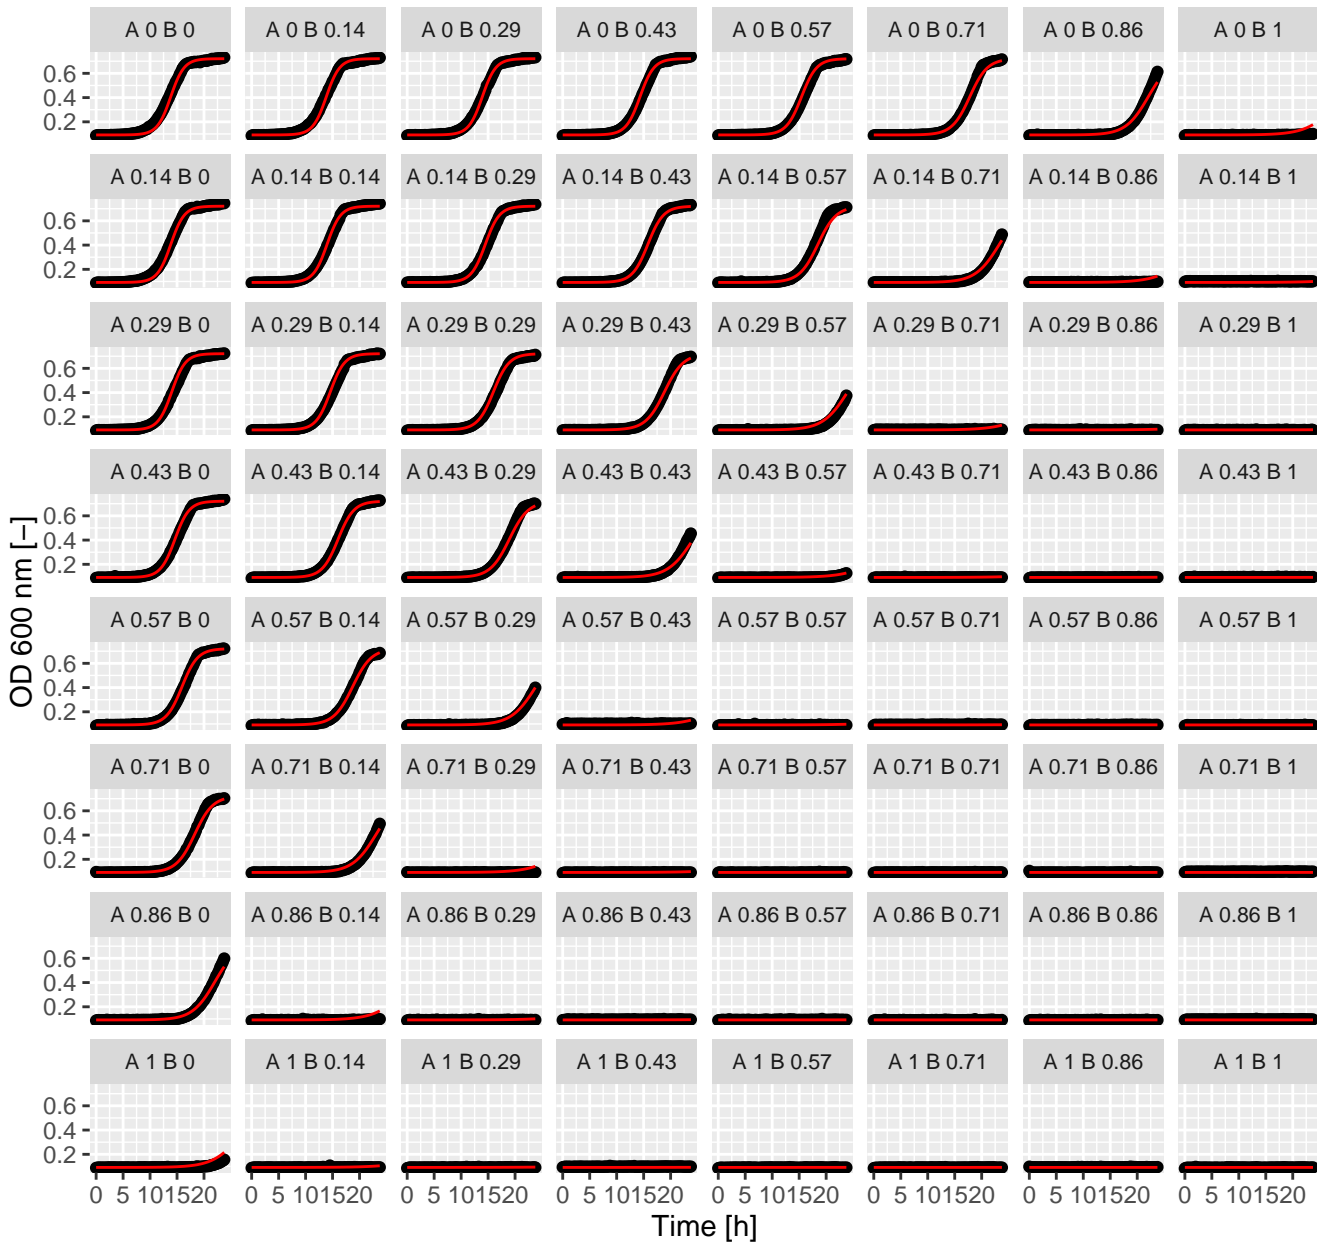

Bro.Cal (= Ax.Bx) exp. additivity (LA)  
 Int\_AB = 0 and Int\_BA = 0 at EC50

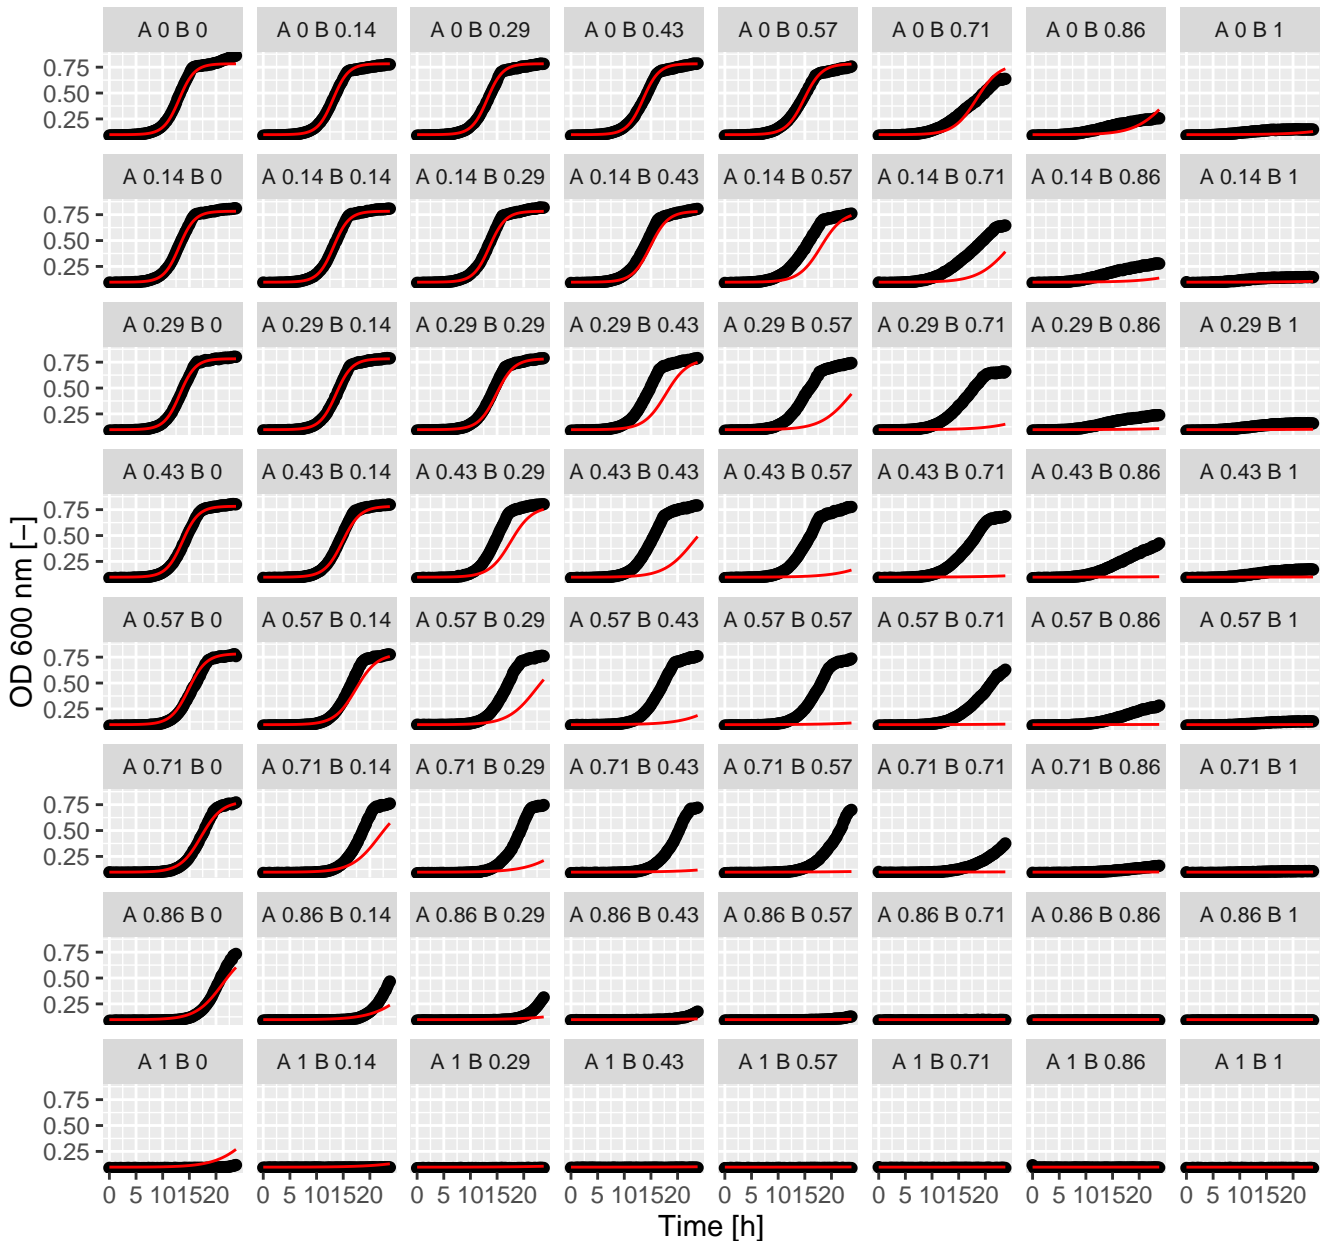

Bro.Cal (= Ax.Bx) full GPDI  
Int\_AB = 0.32 and Int\_BA = 1.38 at EC50

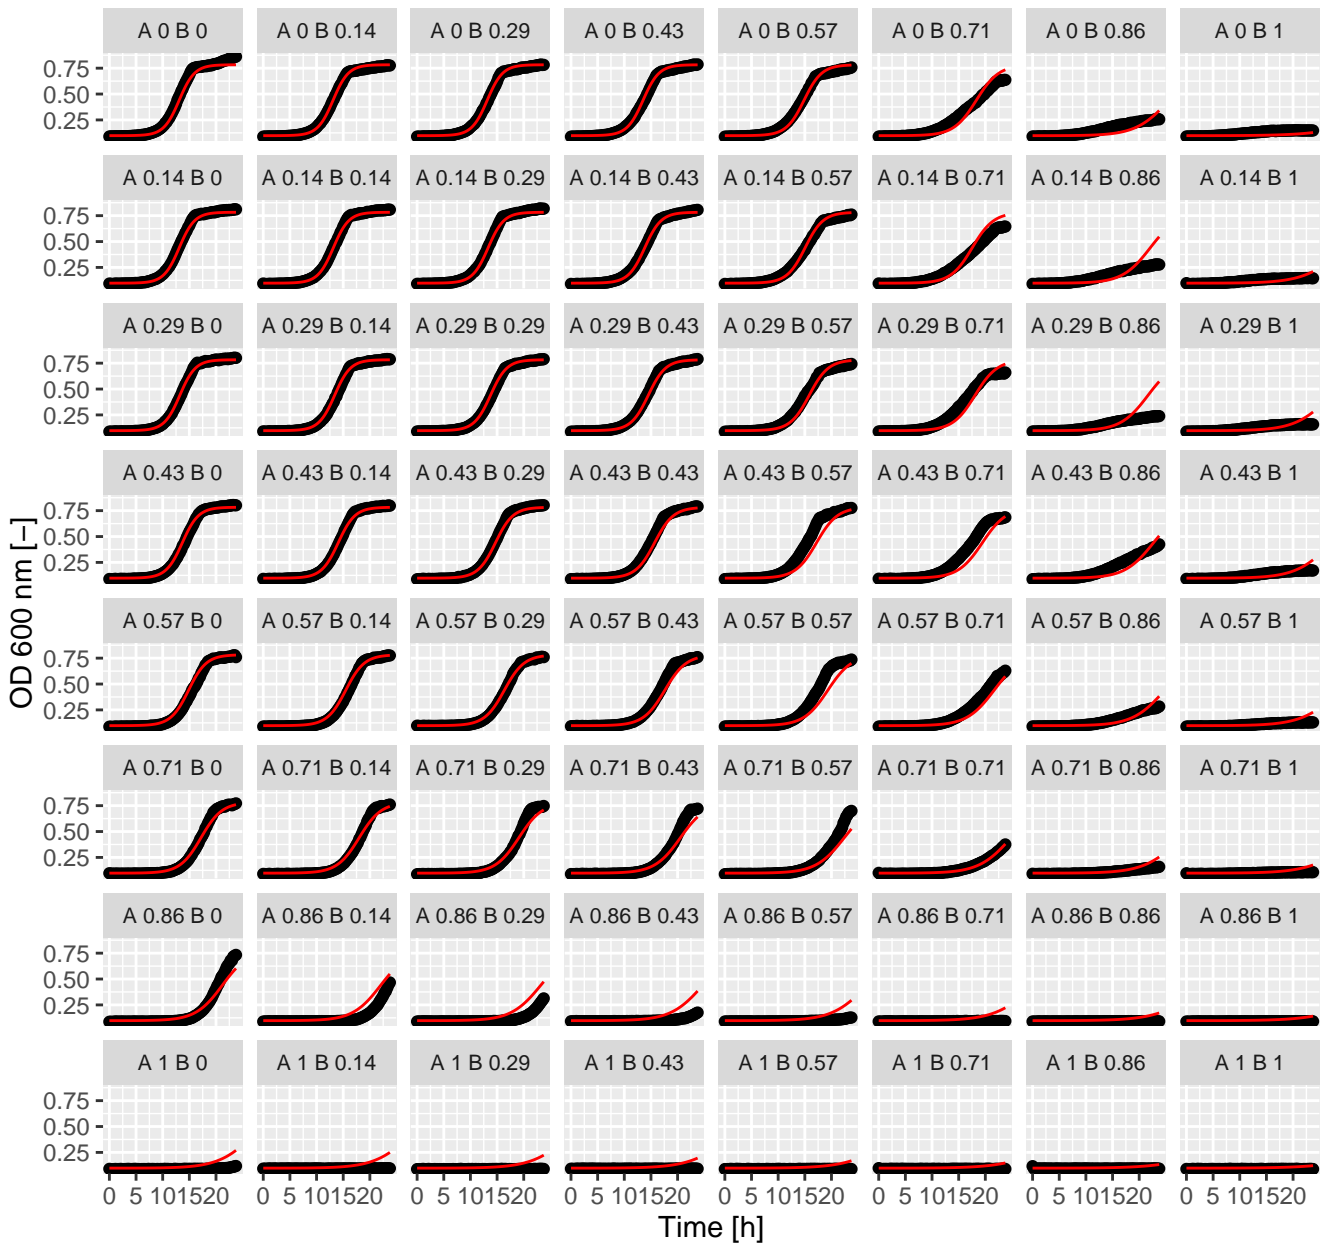

Bro.Dyc (= Ax.Bx) exp. additivity (LA)  
Int\_AB = 0 and Int\_BA = 0 at EC50

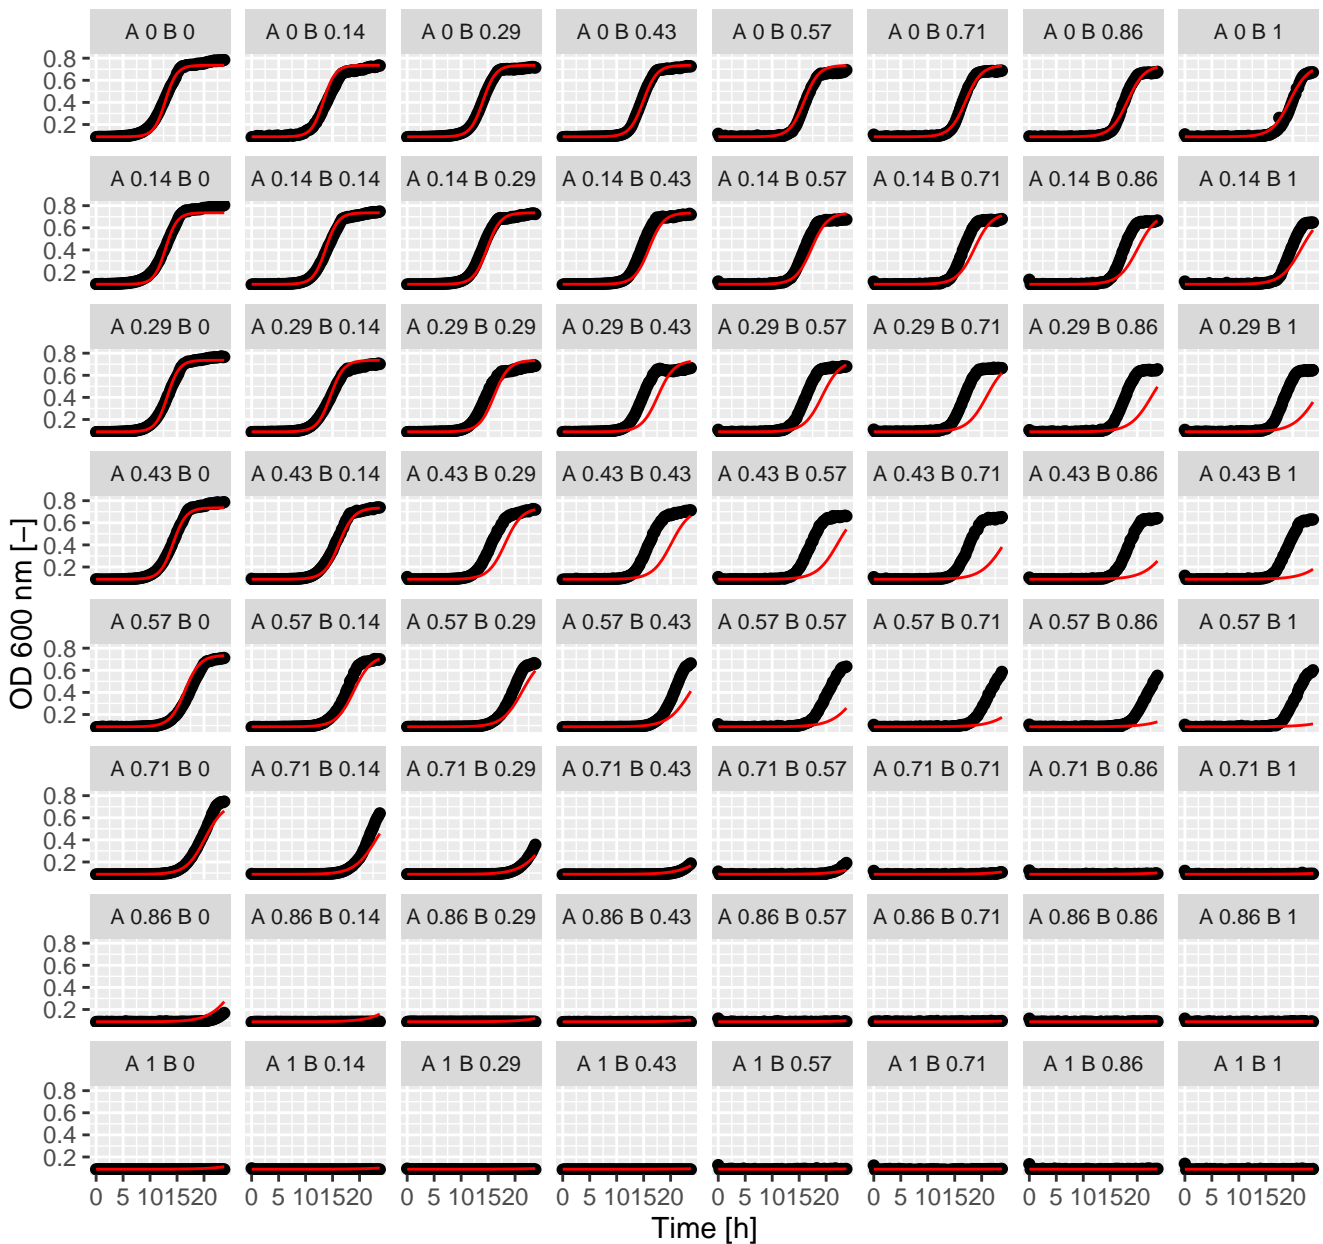

Bro.Dyc (= Ax.Bx) full GPDI  
Int\_AB = -0.04 and Int\_BA = 2.18 at EC50

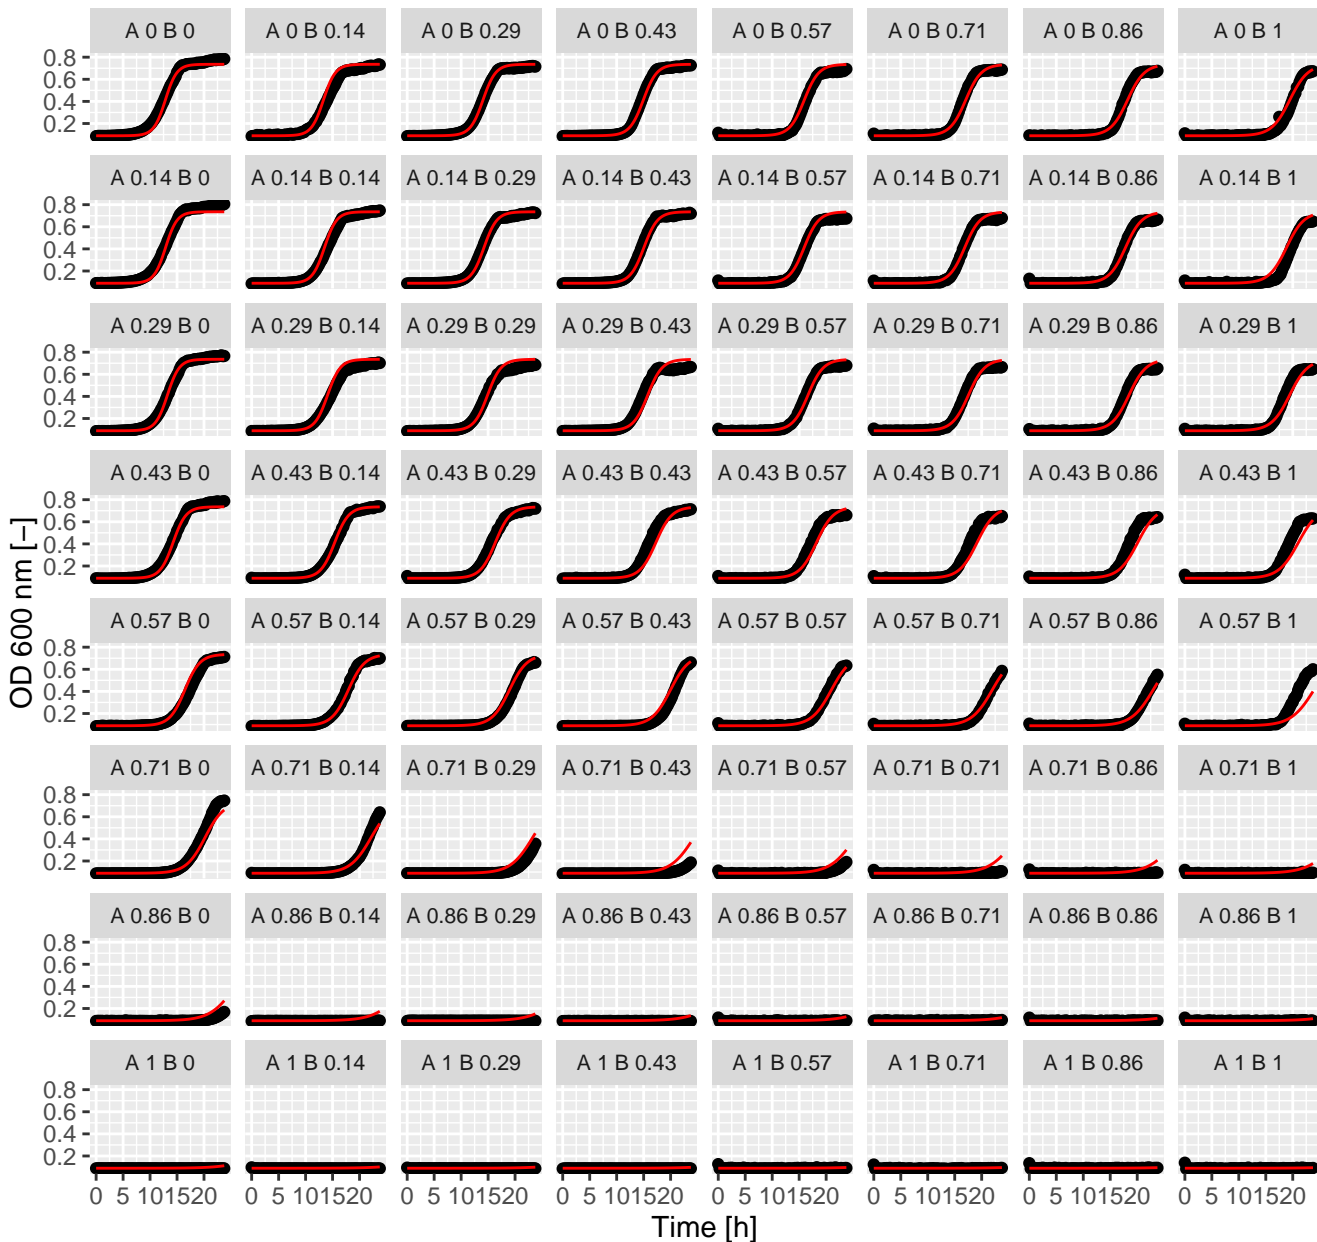



Bro.Fen (= Ax.Bx) exp. additivity (LA)  
Int\_AB = 0 and Int\_BA = 0 at EC50

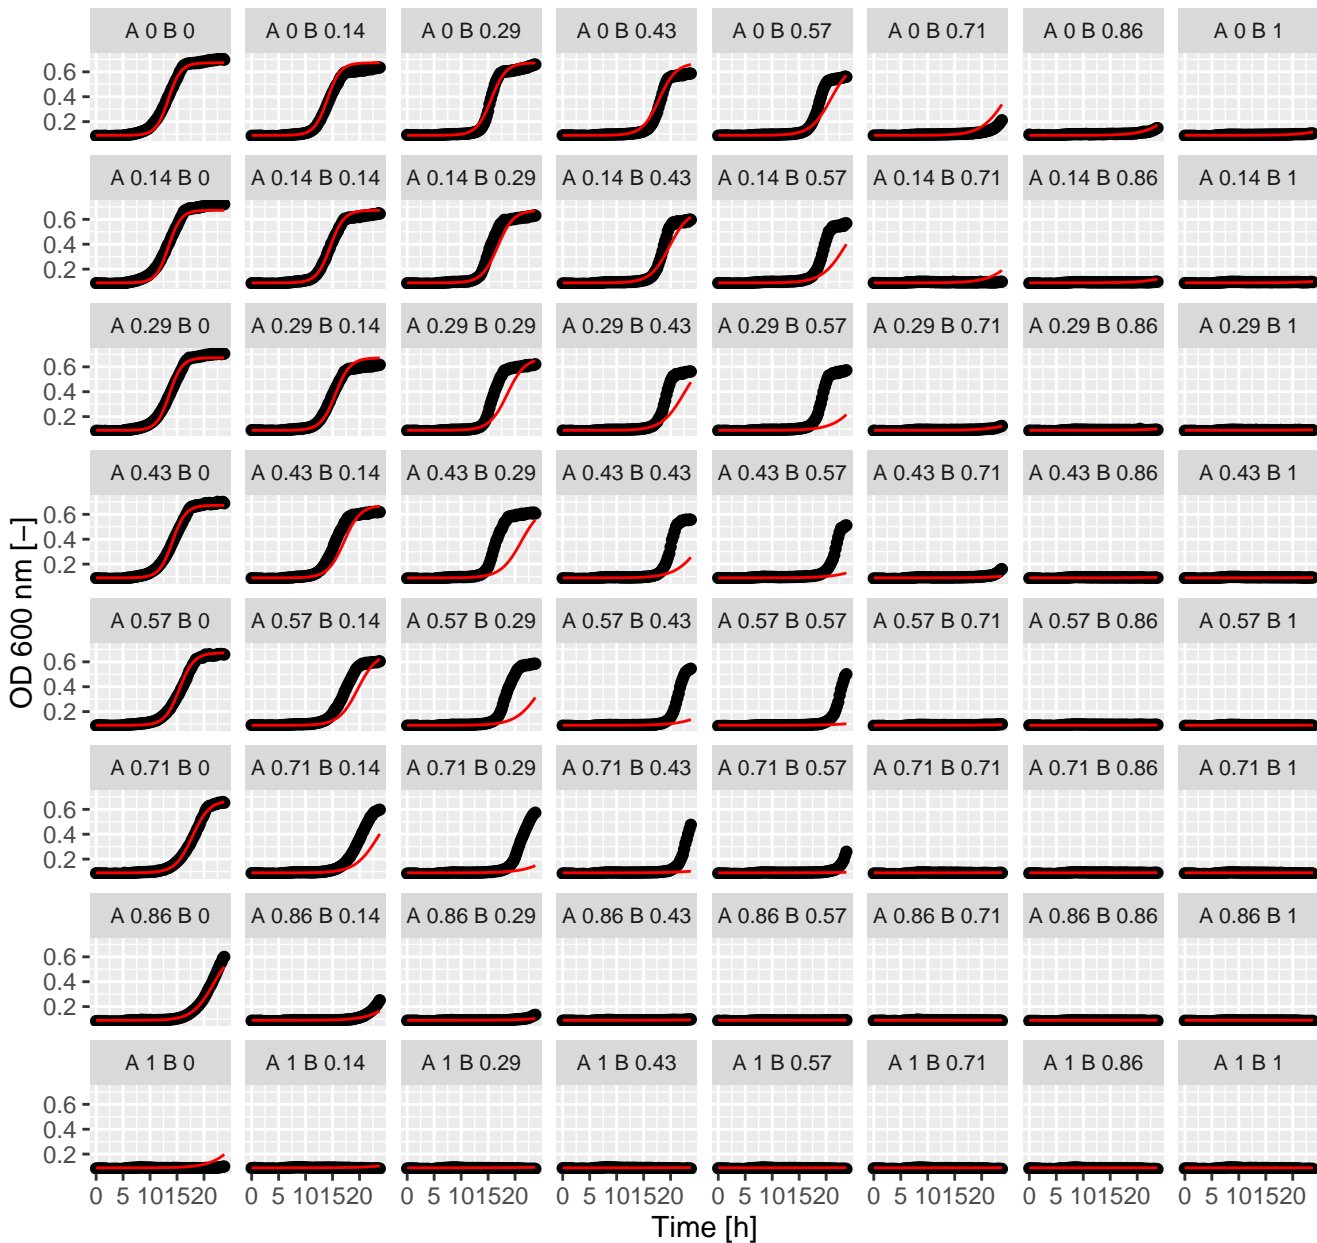

Bro.Fen (= Ax.Bx) full GPDI  
Int\_AB = 0.17 and Int\_BA = 1.15 at EC50

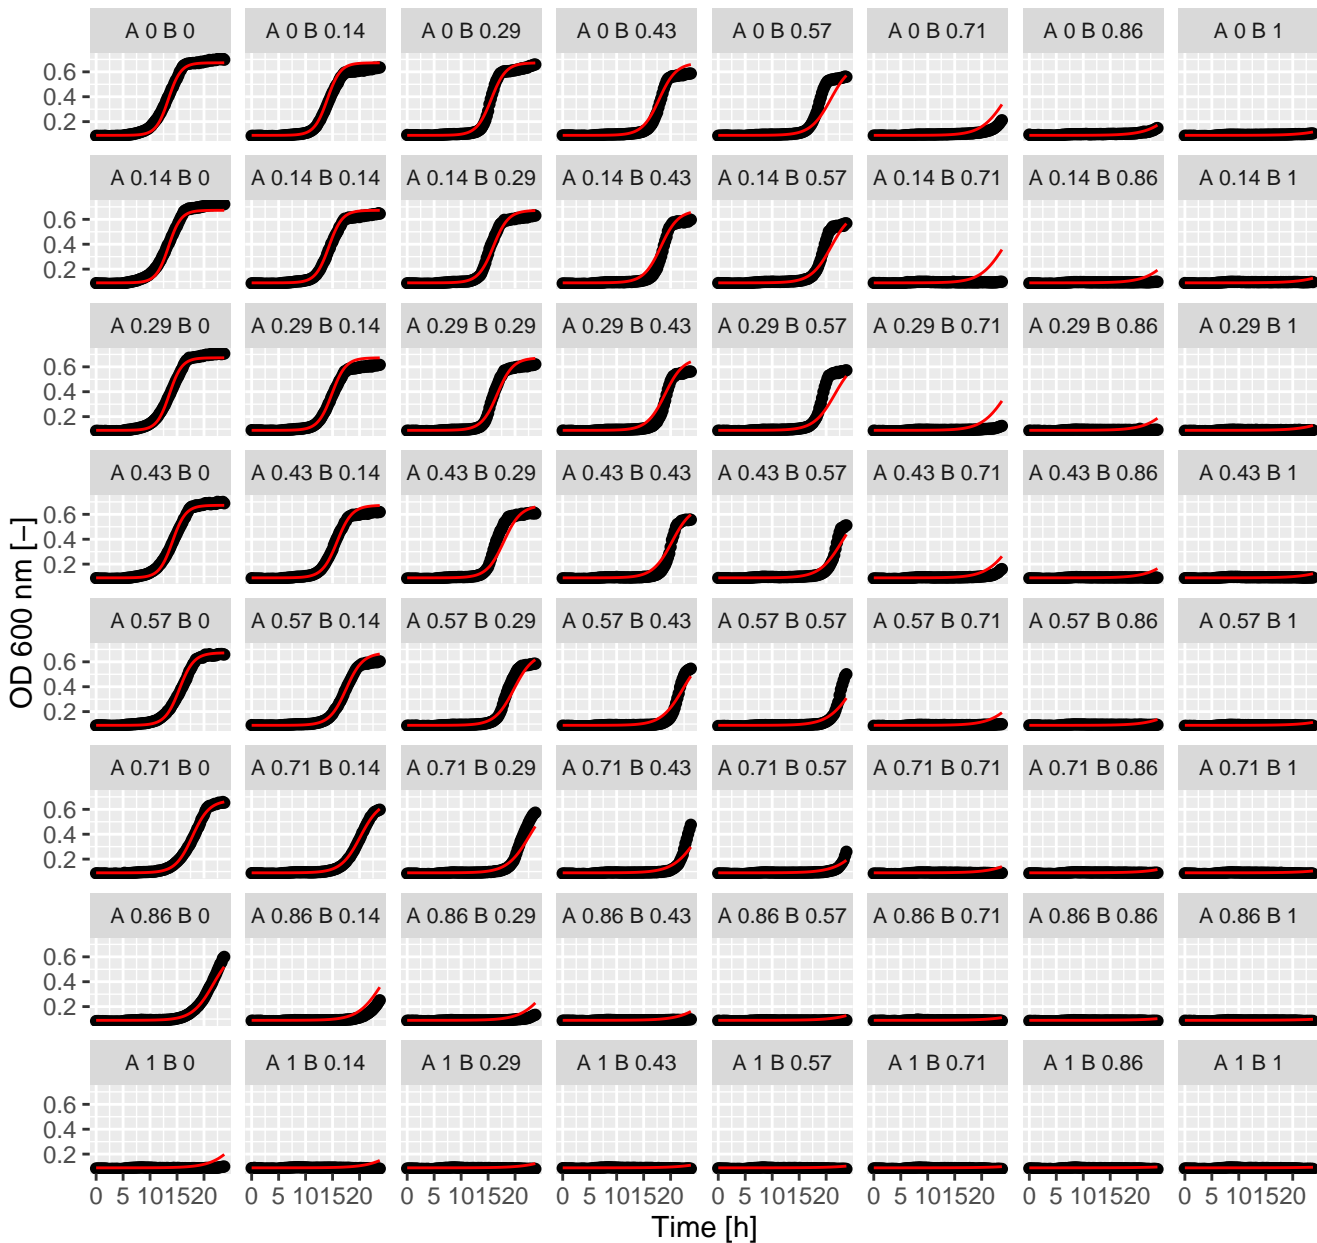

Bro.Hal (= Ax.Bx) exp. additivity (LA)  
Int\_AB = 0 and Int\_BA = 0 at EC50

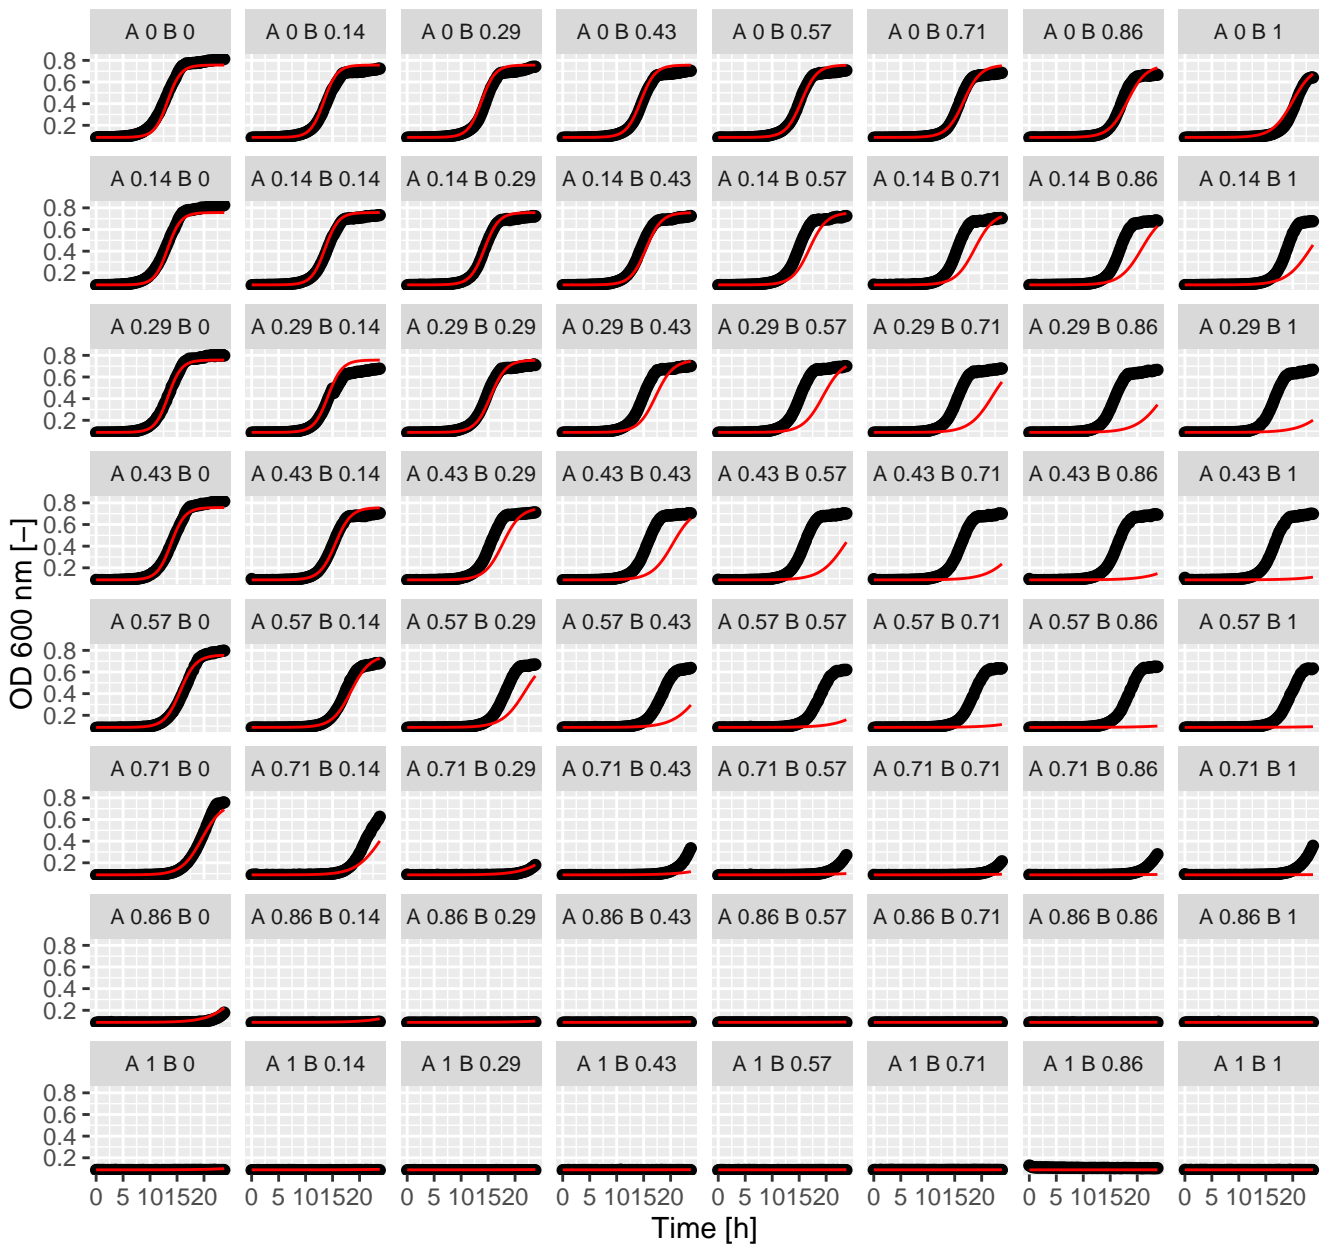

Bro.Hal (= Ax.Bx) full GPDI  
Int\_AB = -0.01 and Int\_BA = 3.71 at EC50

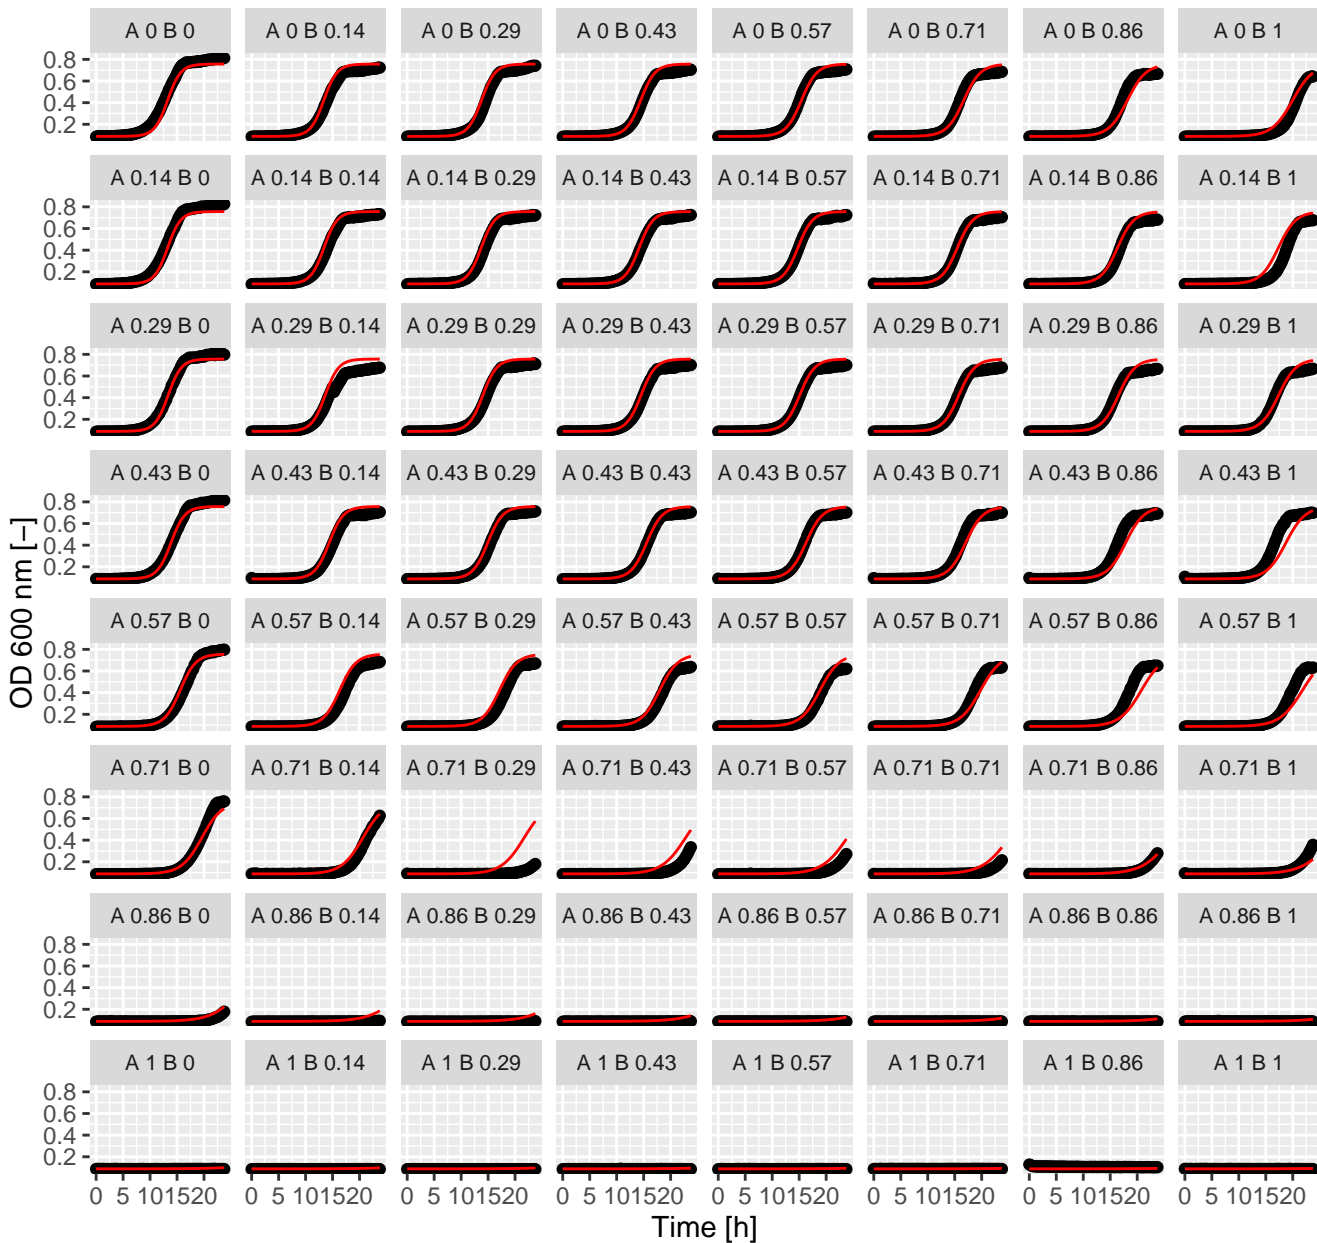

Bro.Lat (= Ax.Bx) exp. additivity (LA)  
Int\_AB = 0 and Int\_BA = 0 at EC50

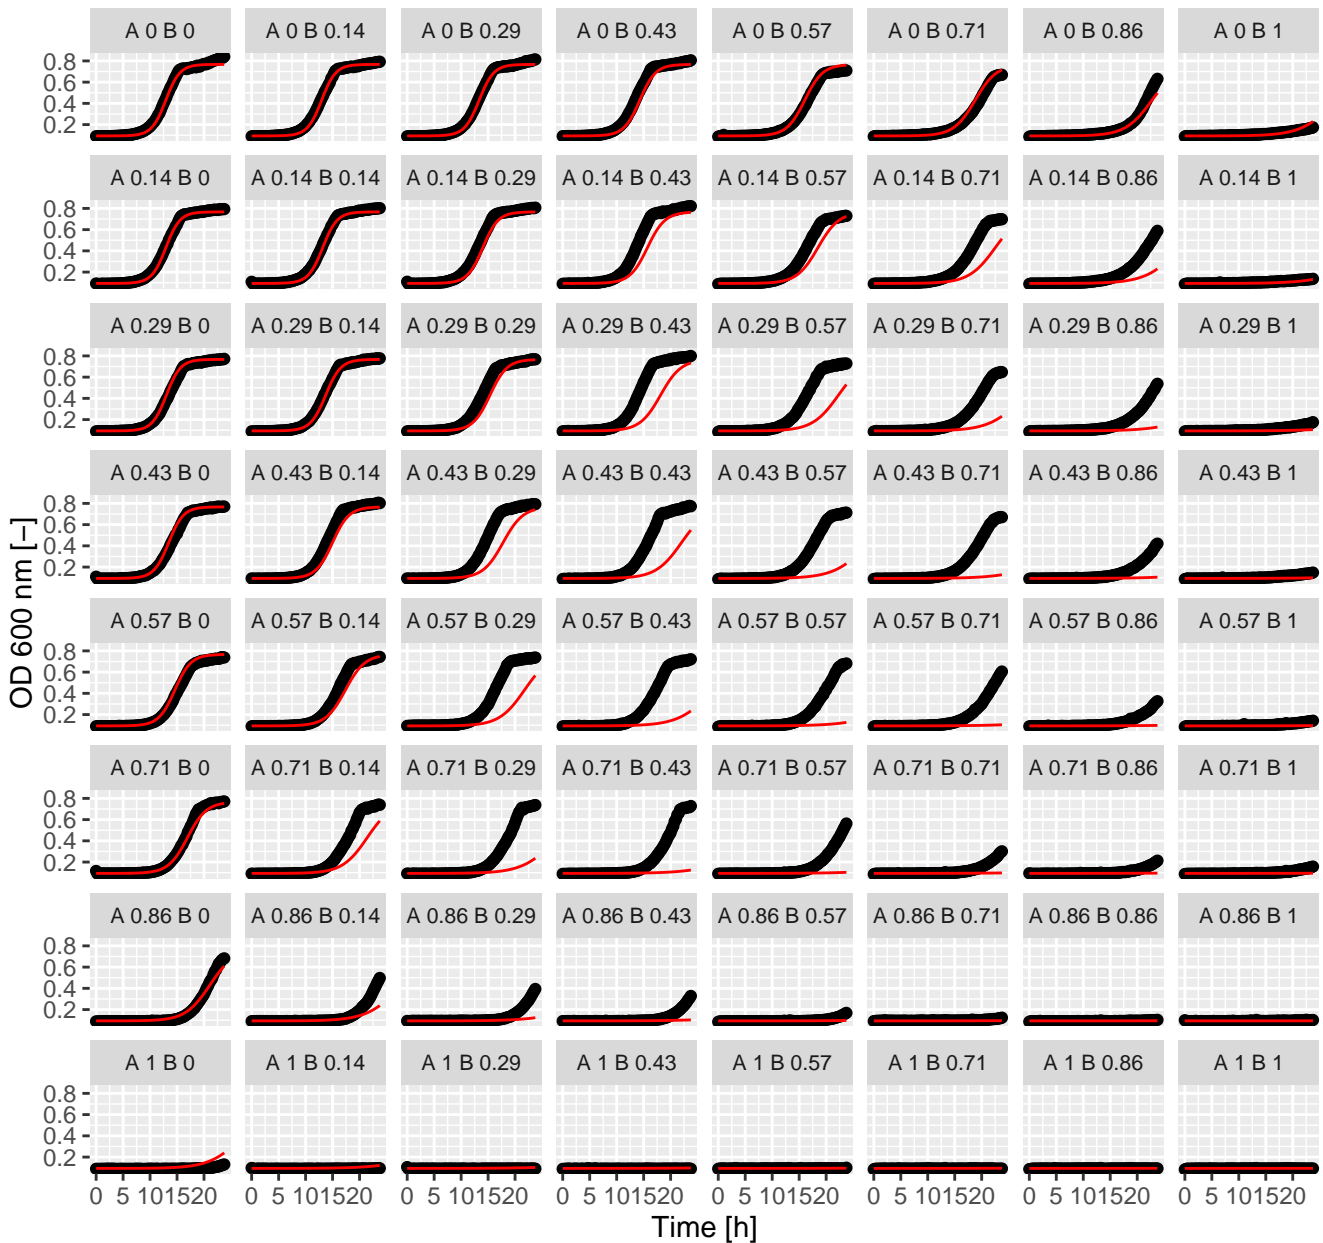

Bro.Lat (= Ax.Bx) full GPDI  
Int\_AB = 0.24 and Int\_BA = 1.22 at EC50

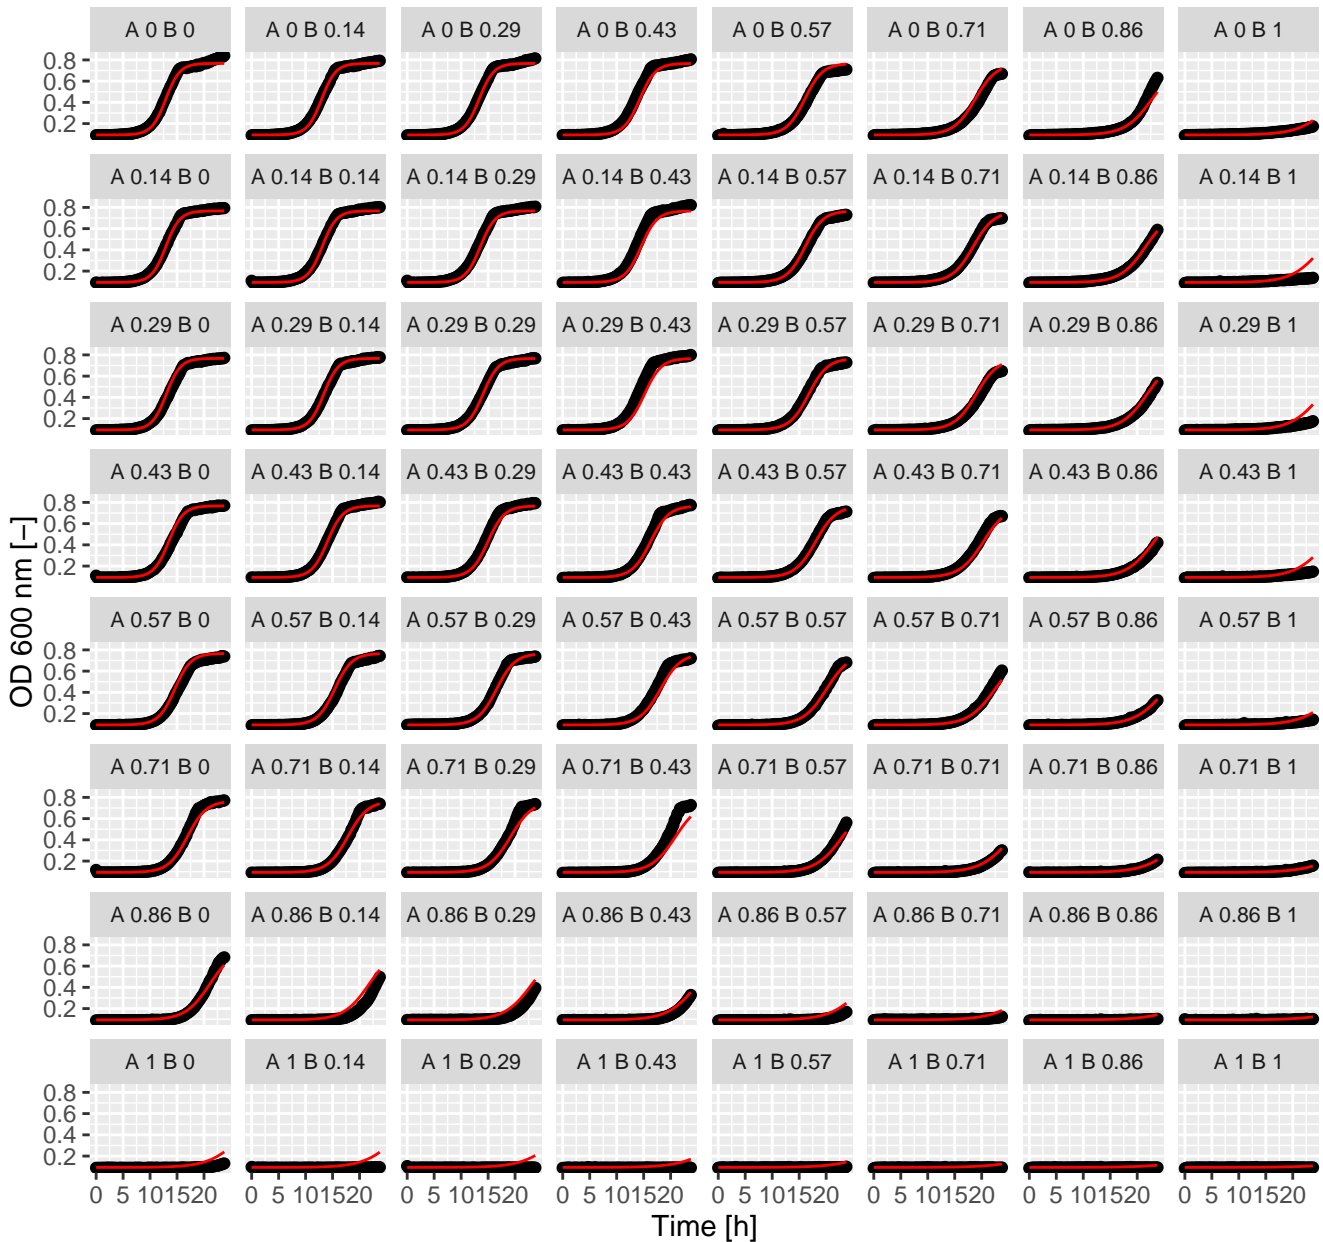

Bro.Pen (= Ax.Bx) exp. additivity (LA)  
Int\_AB = 0 and Int\_BA = 0 at EC50

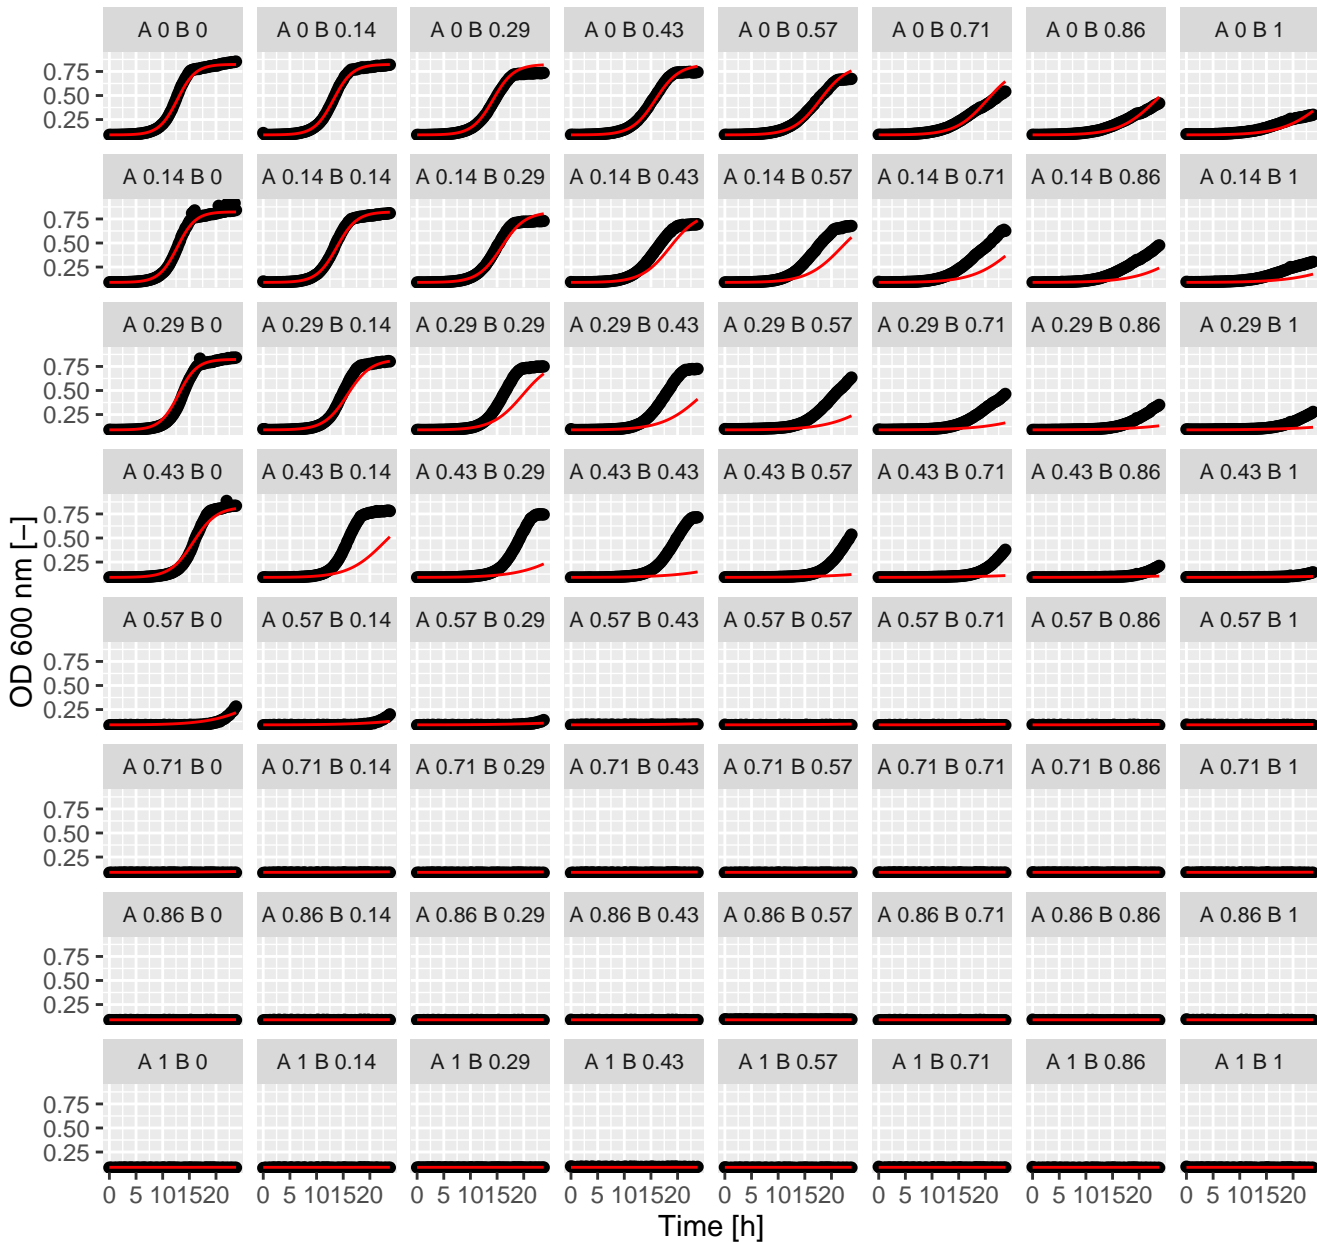

Bro.Pen (= Ax.Bx) full GPDI  
Int\_AB = 0.19 and Int\_BA = 1.18 at EC50

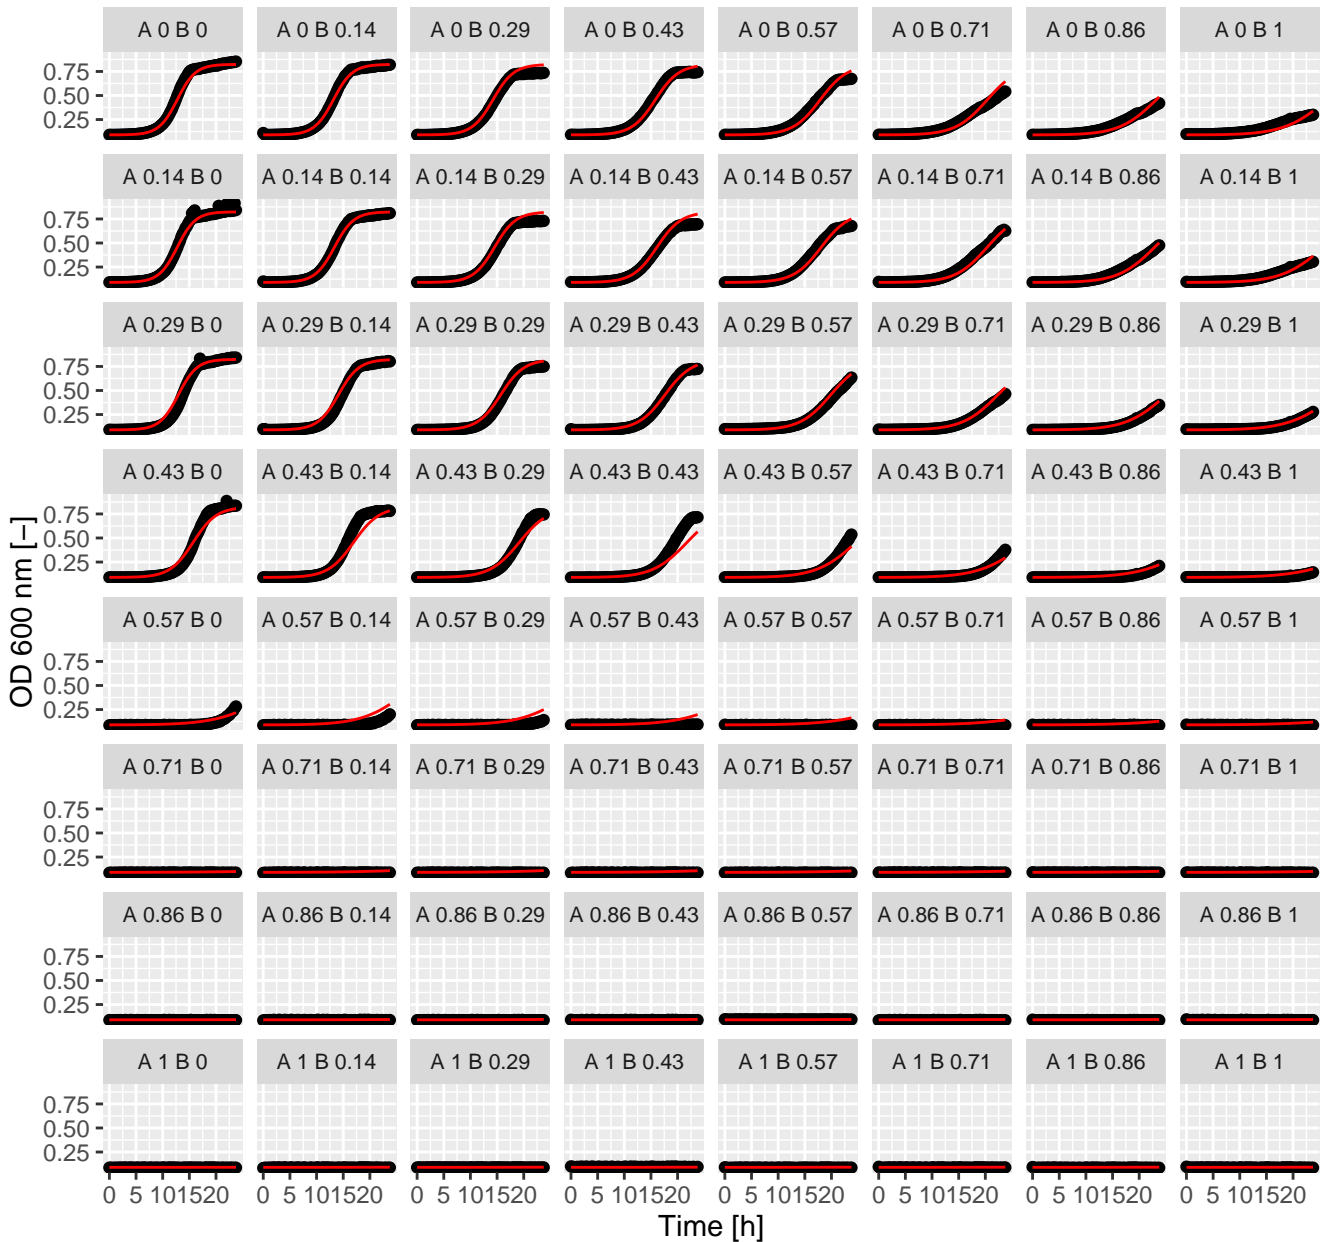



Bro.Rap (= Ax.Bx) exp. additivity (LA)  
Int\_AB = 0 and Int\_BA = 0 at EC50

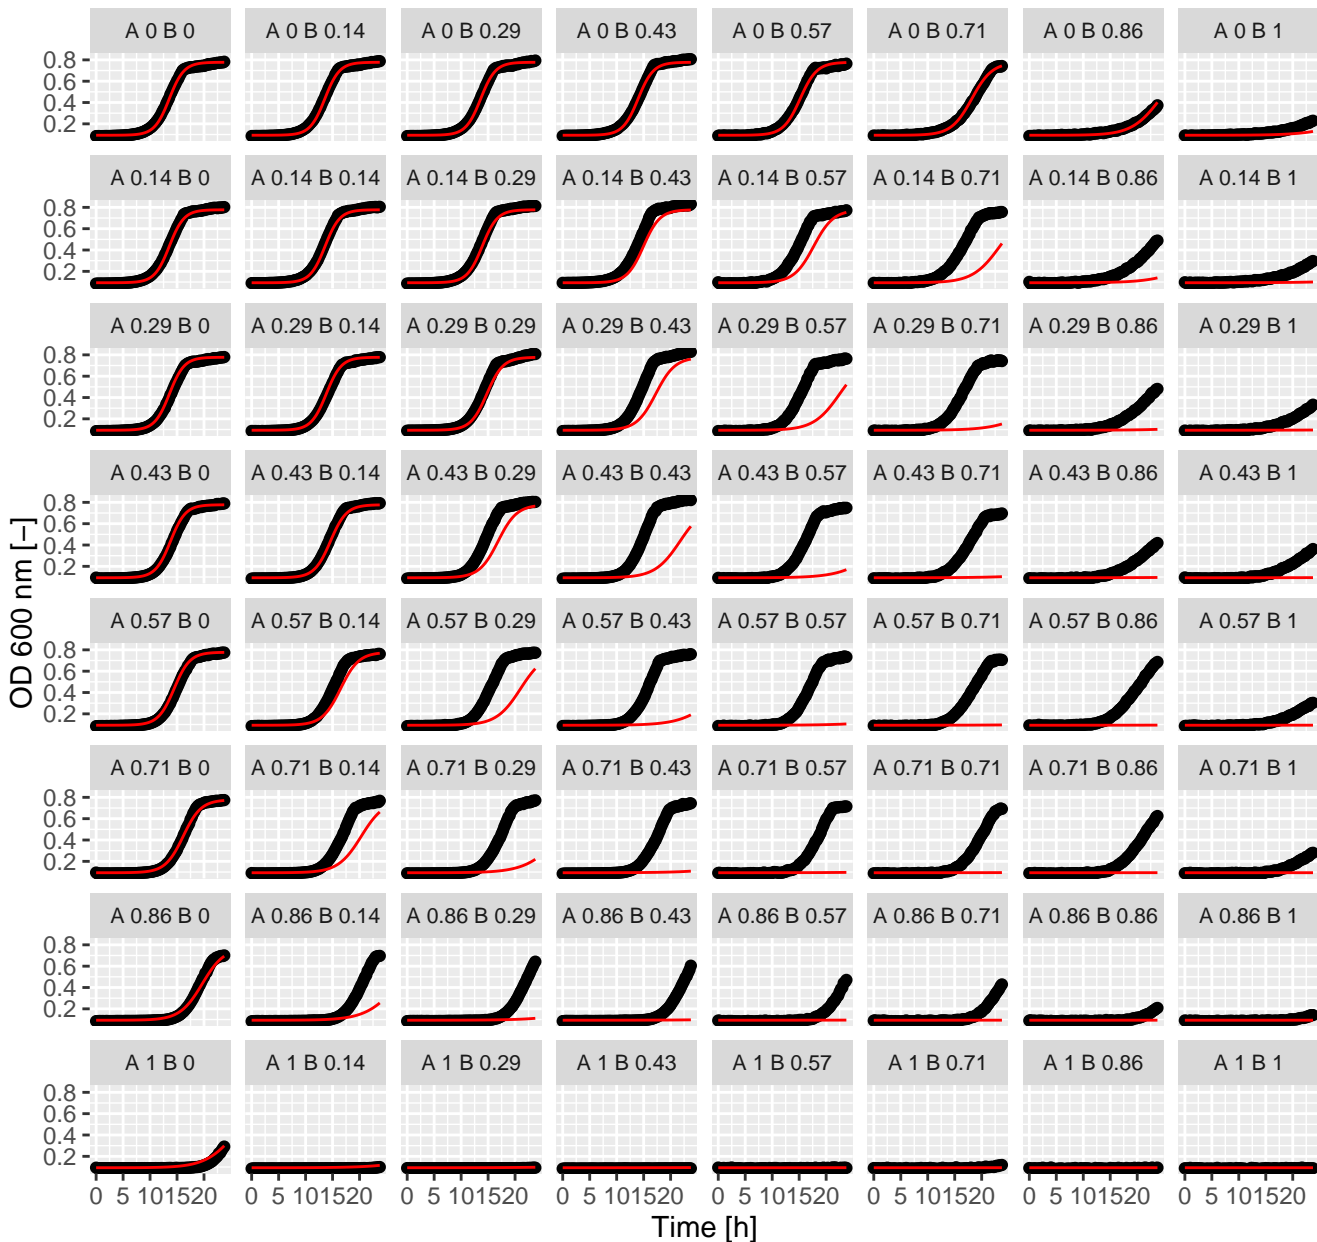

Bro.Rap (= Ax.Bx) full GPDI  
 Int\_AB = 0.43 and Int\_BA = 1.58 at EC50

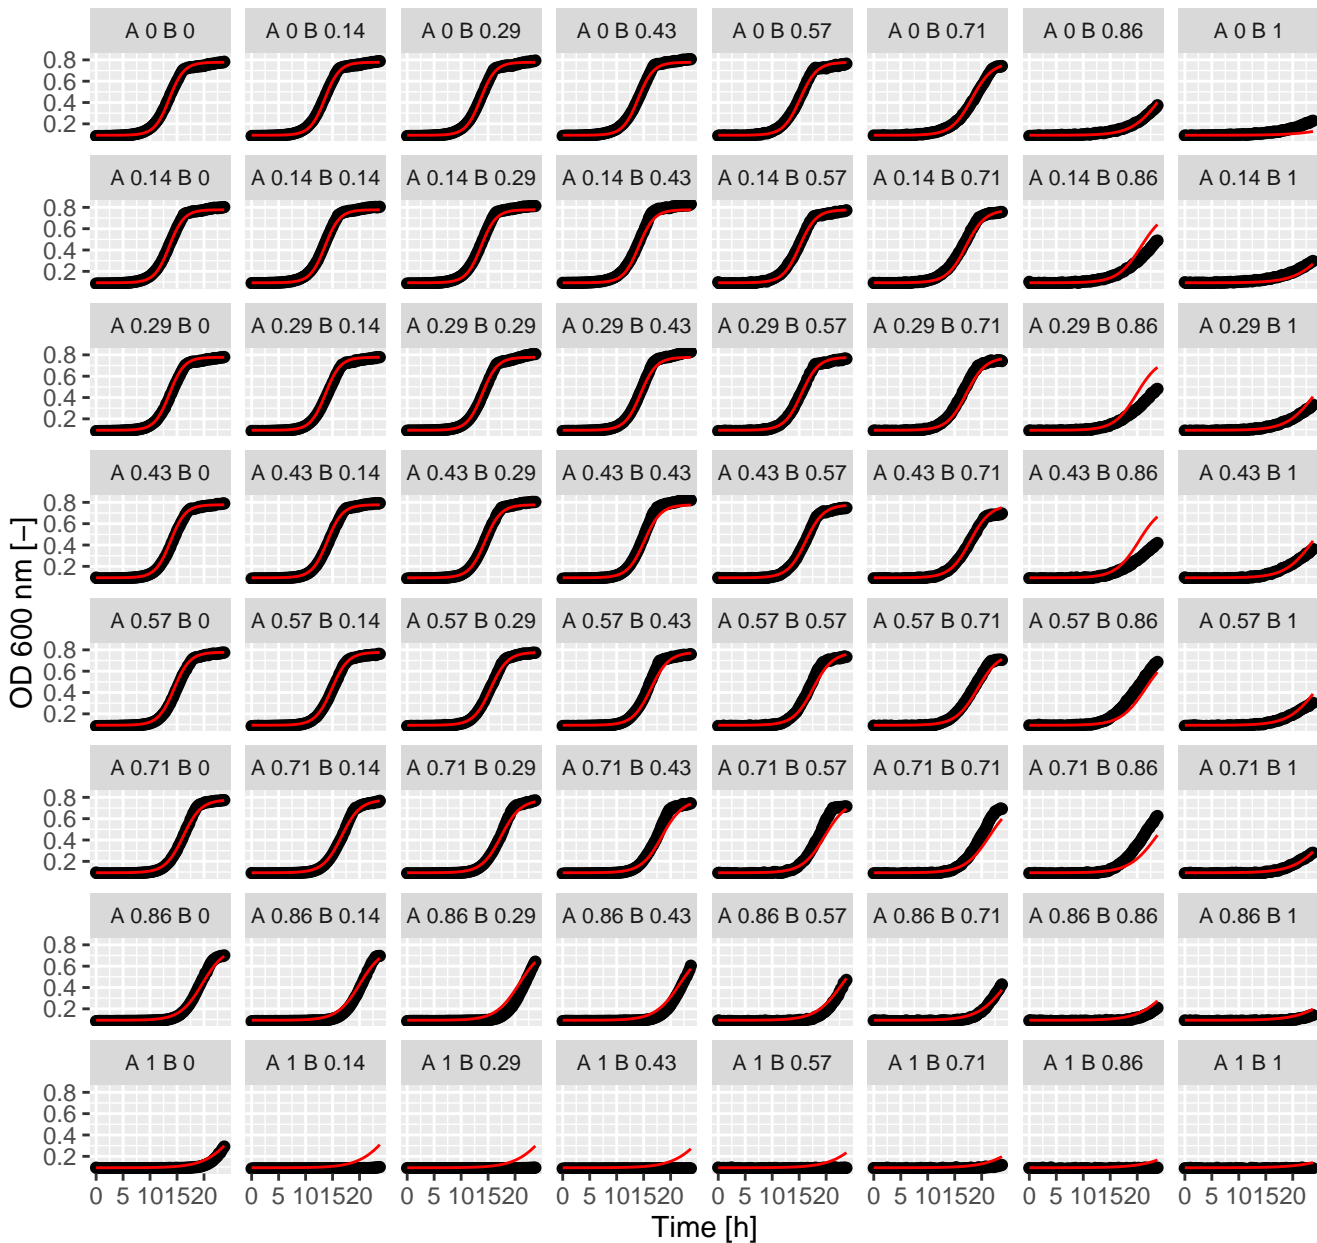

Bro.Sta (= Ax.Bx) exp. additivity (LA)  
Int\_AB = 0 and Int\_BA = 0 at EC50

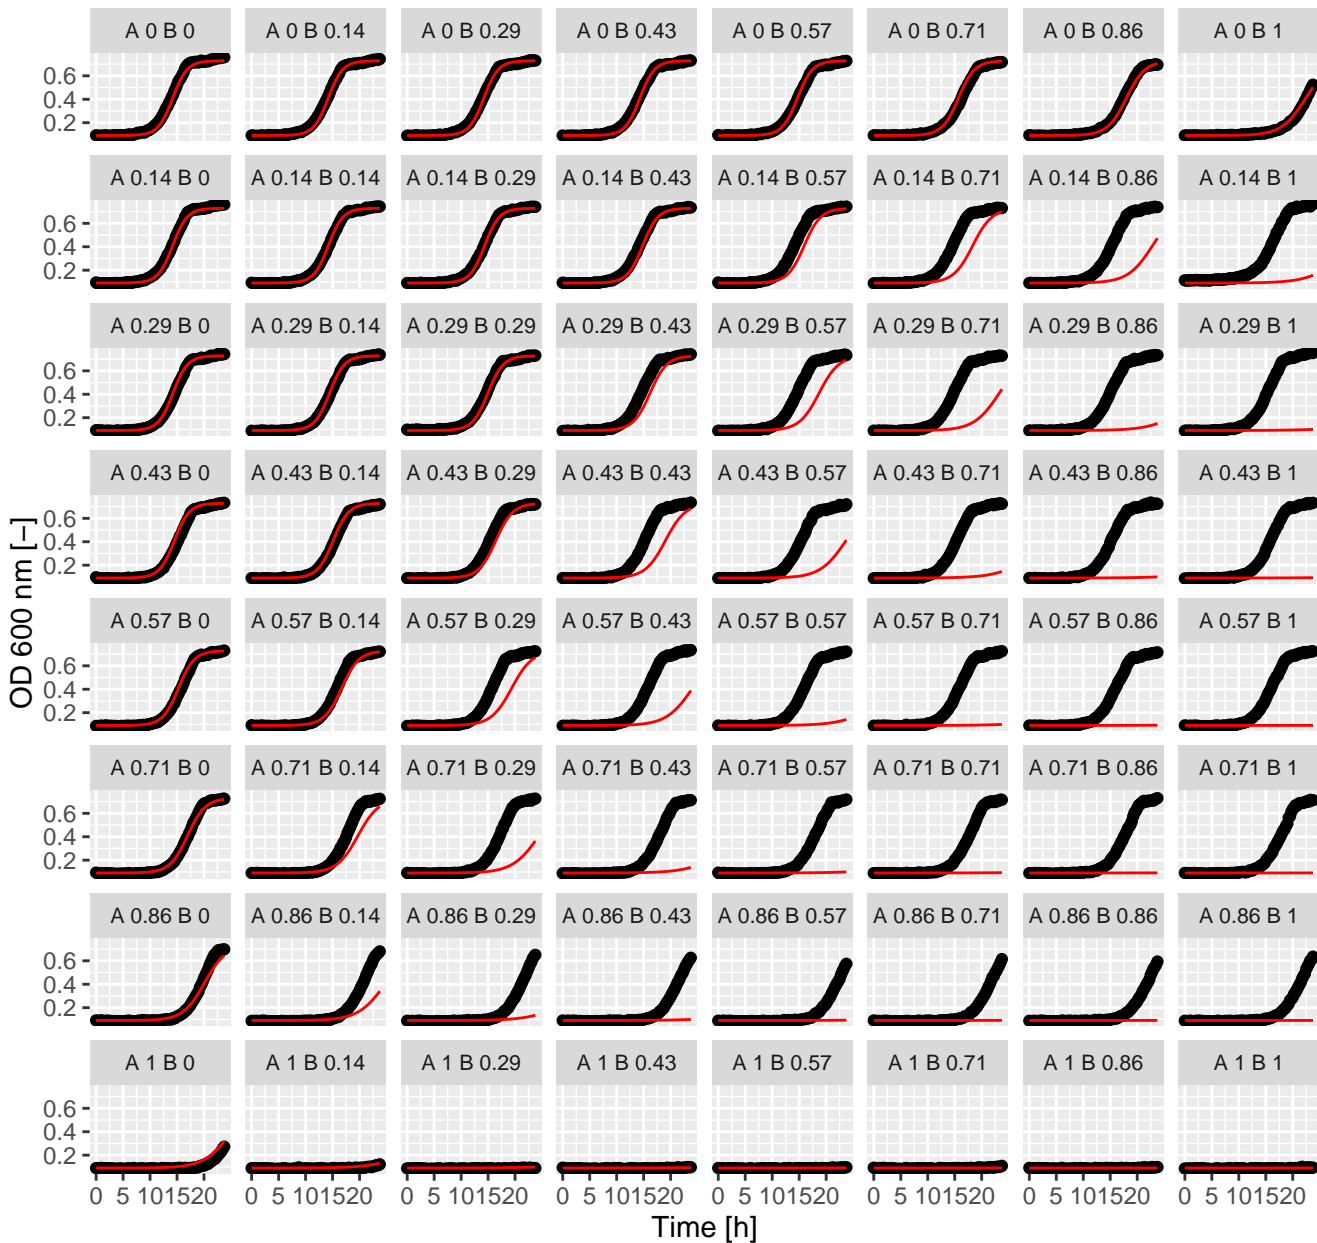

Bro.Sta (= Ax.Bx) full GPDI  
Int\_AB = -0.02 and Int\_BA = 15.92 at EC50

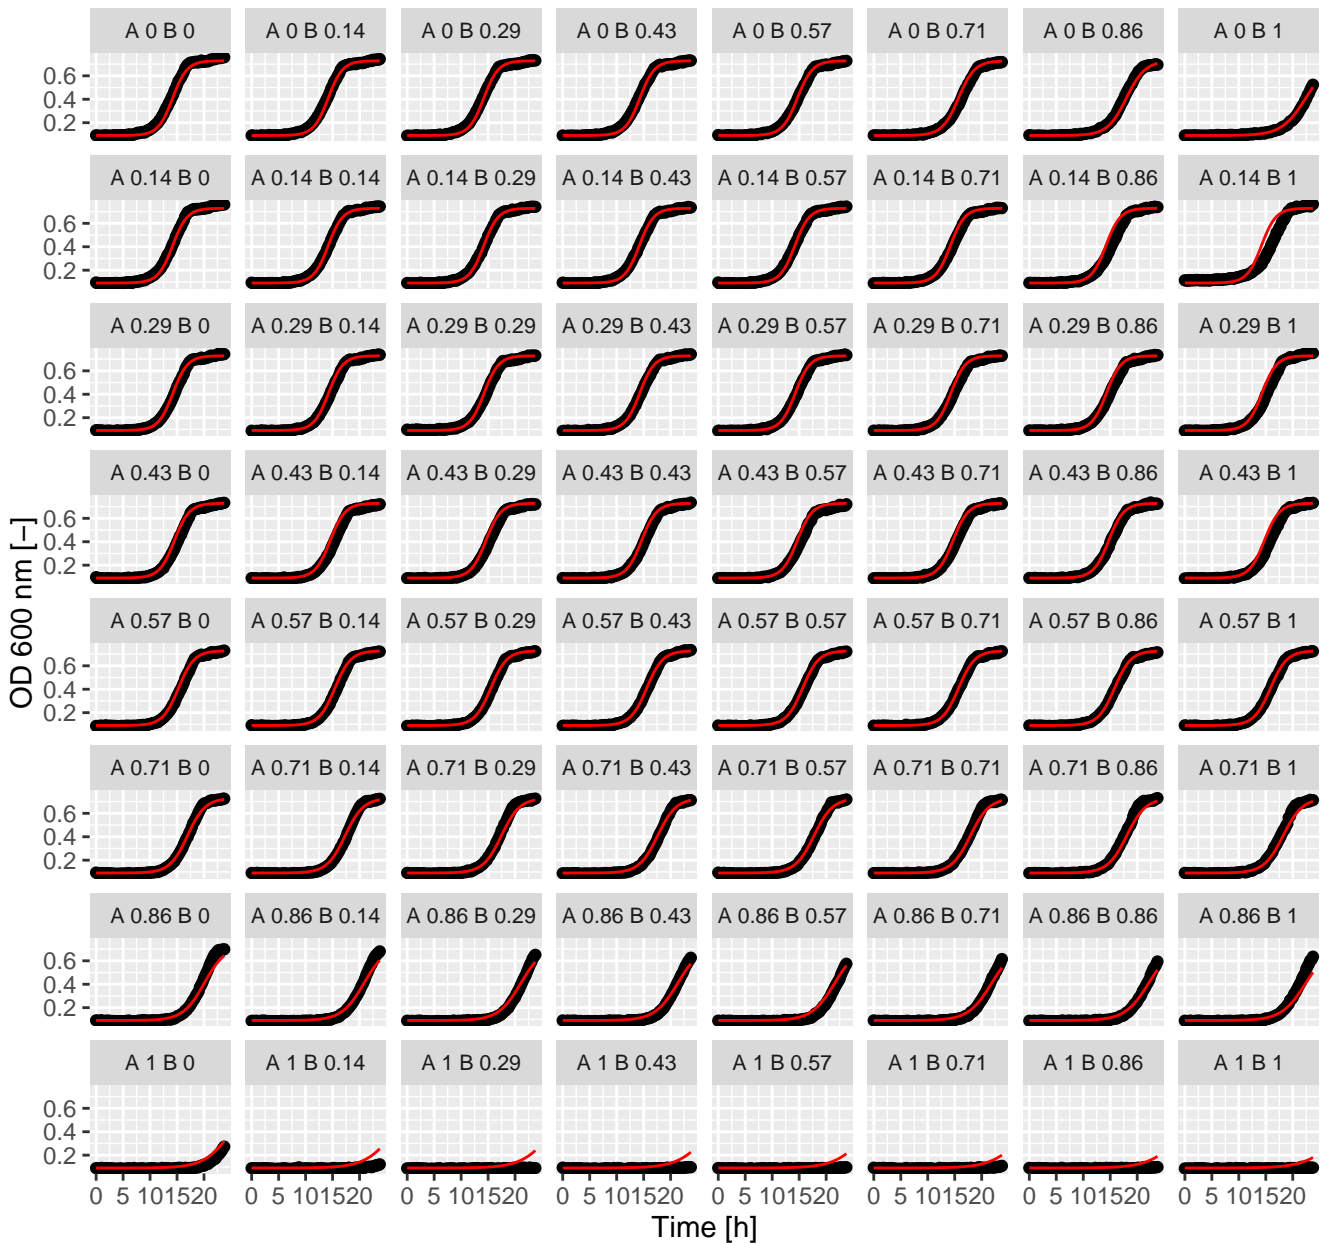

Bro.Tac (= Ax.Bx) exp. additivity (LA)  
Int\_AB = 0 and Int\_BA = 0 at EC50

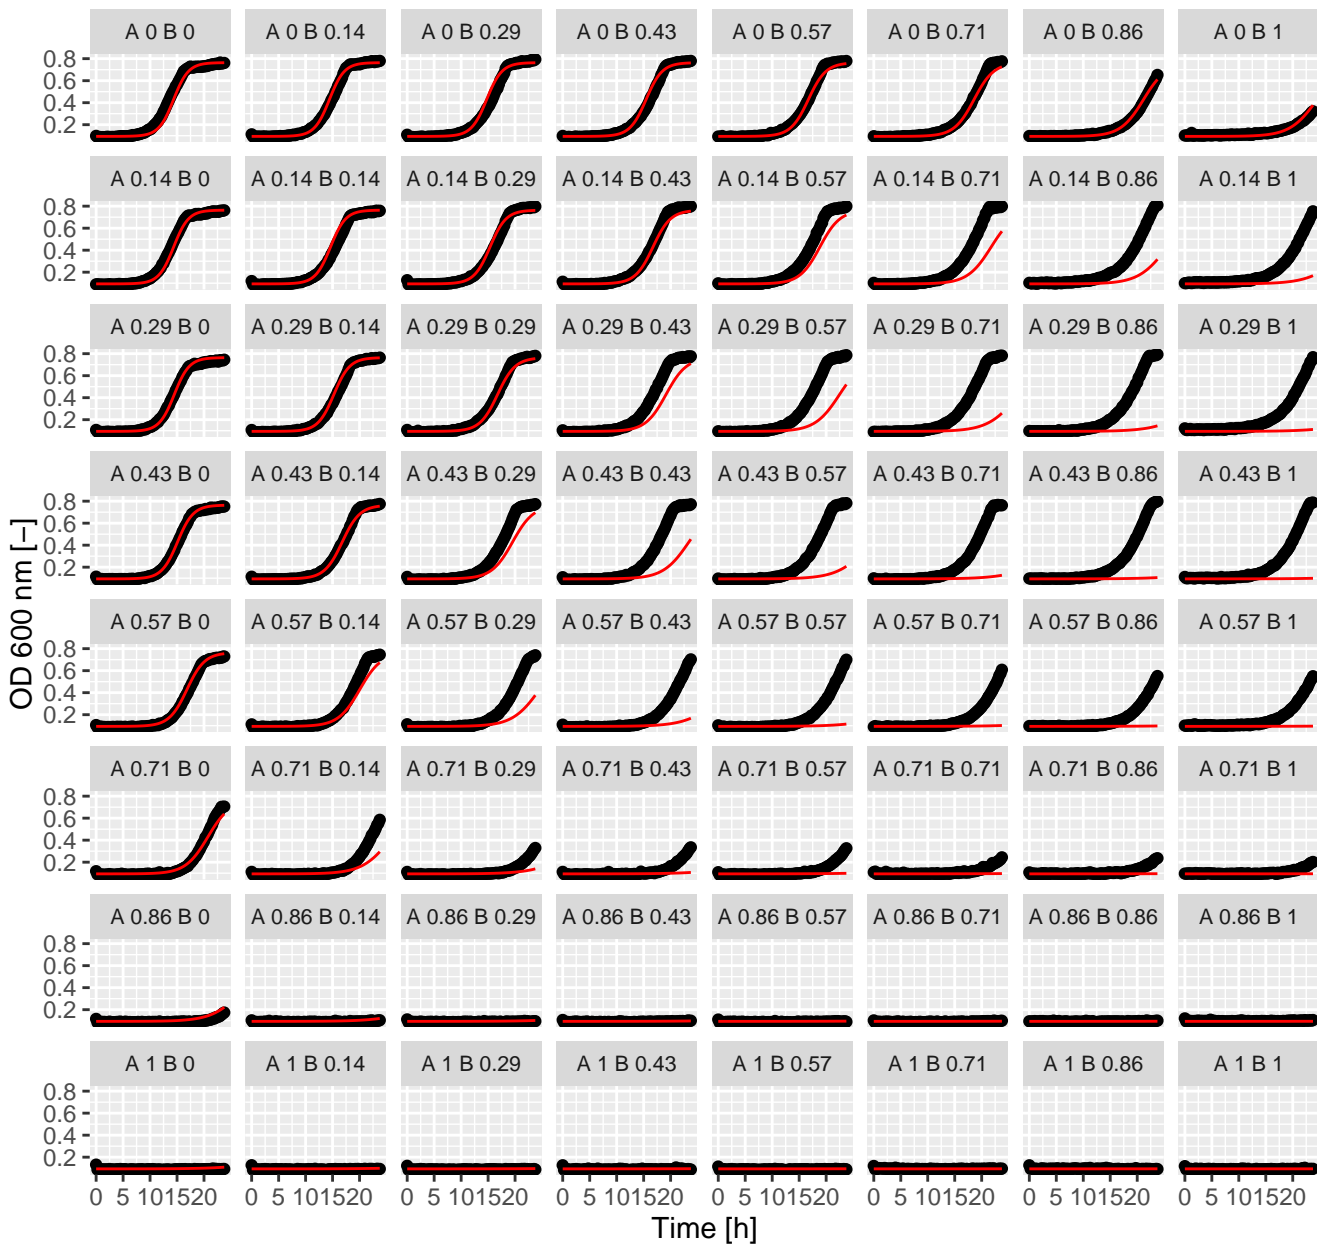

Bro.Tac (= Ax.Bx) full GPDI  
Int\_AB = 0.06 and Int\_BA = 3.12 at EC50

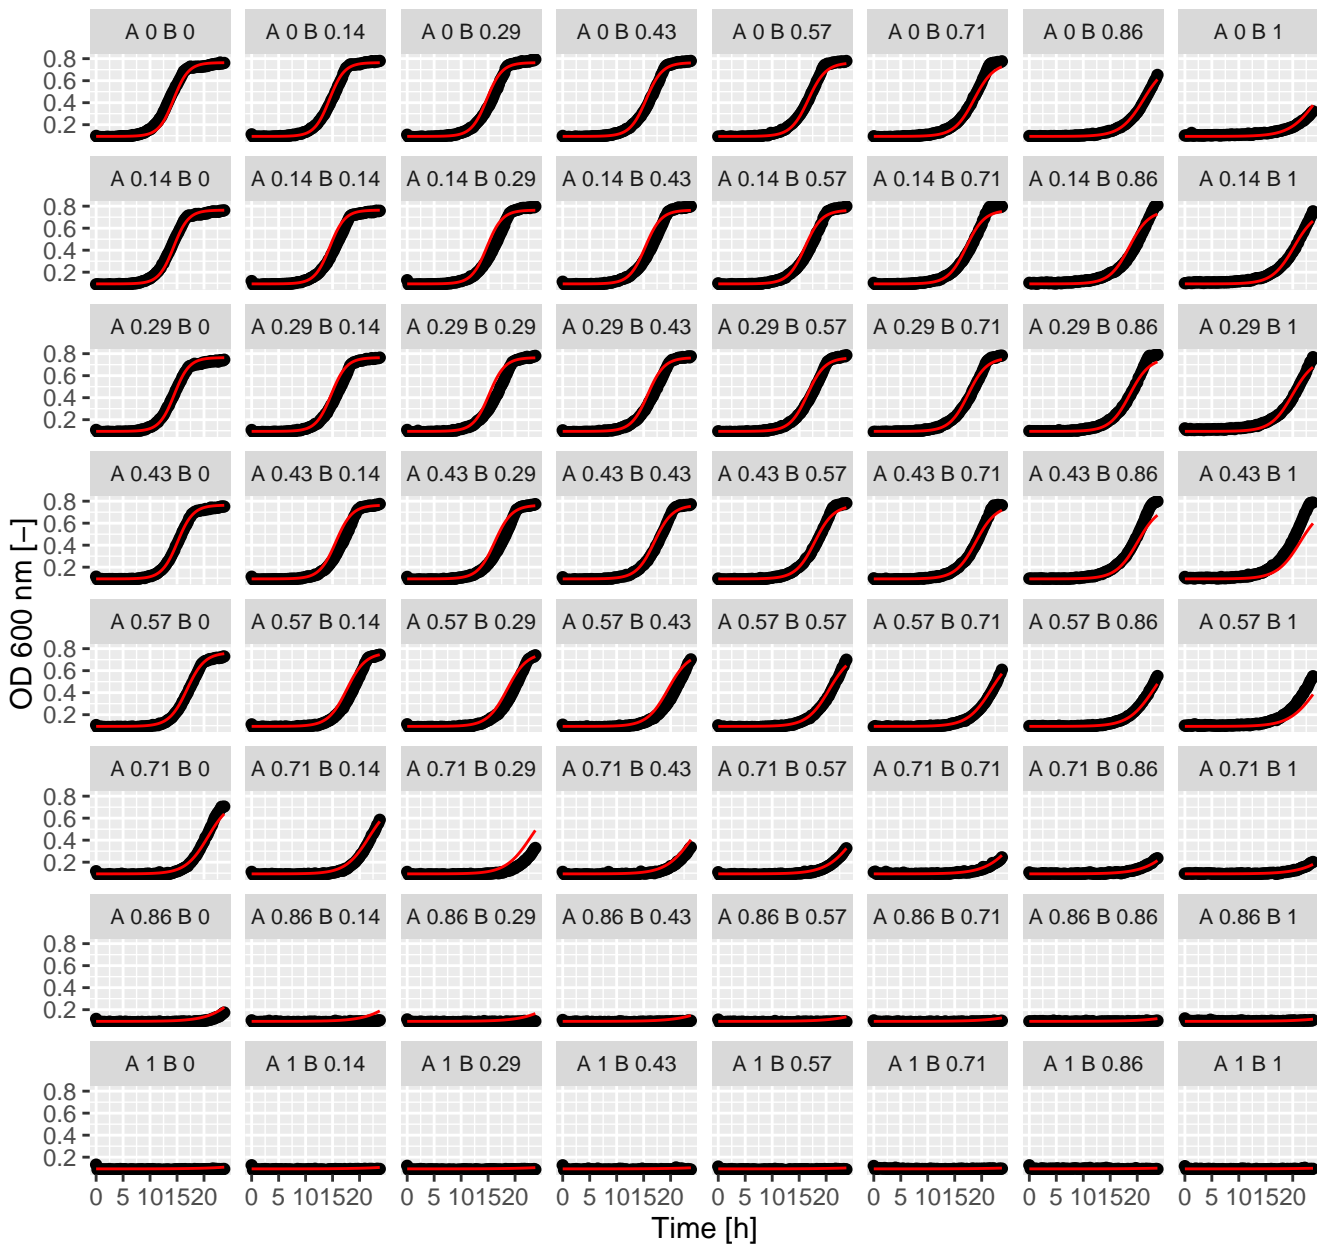

Bro.Ter (= Ax.Bx) exp. additivity (LA)  
 Int\_AB = 0 and Int\_BA = 0 at EC50

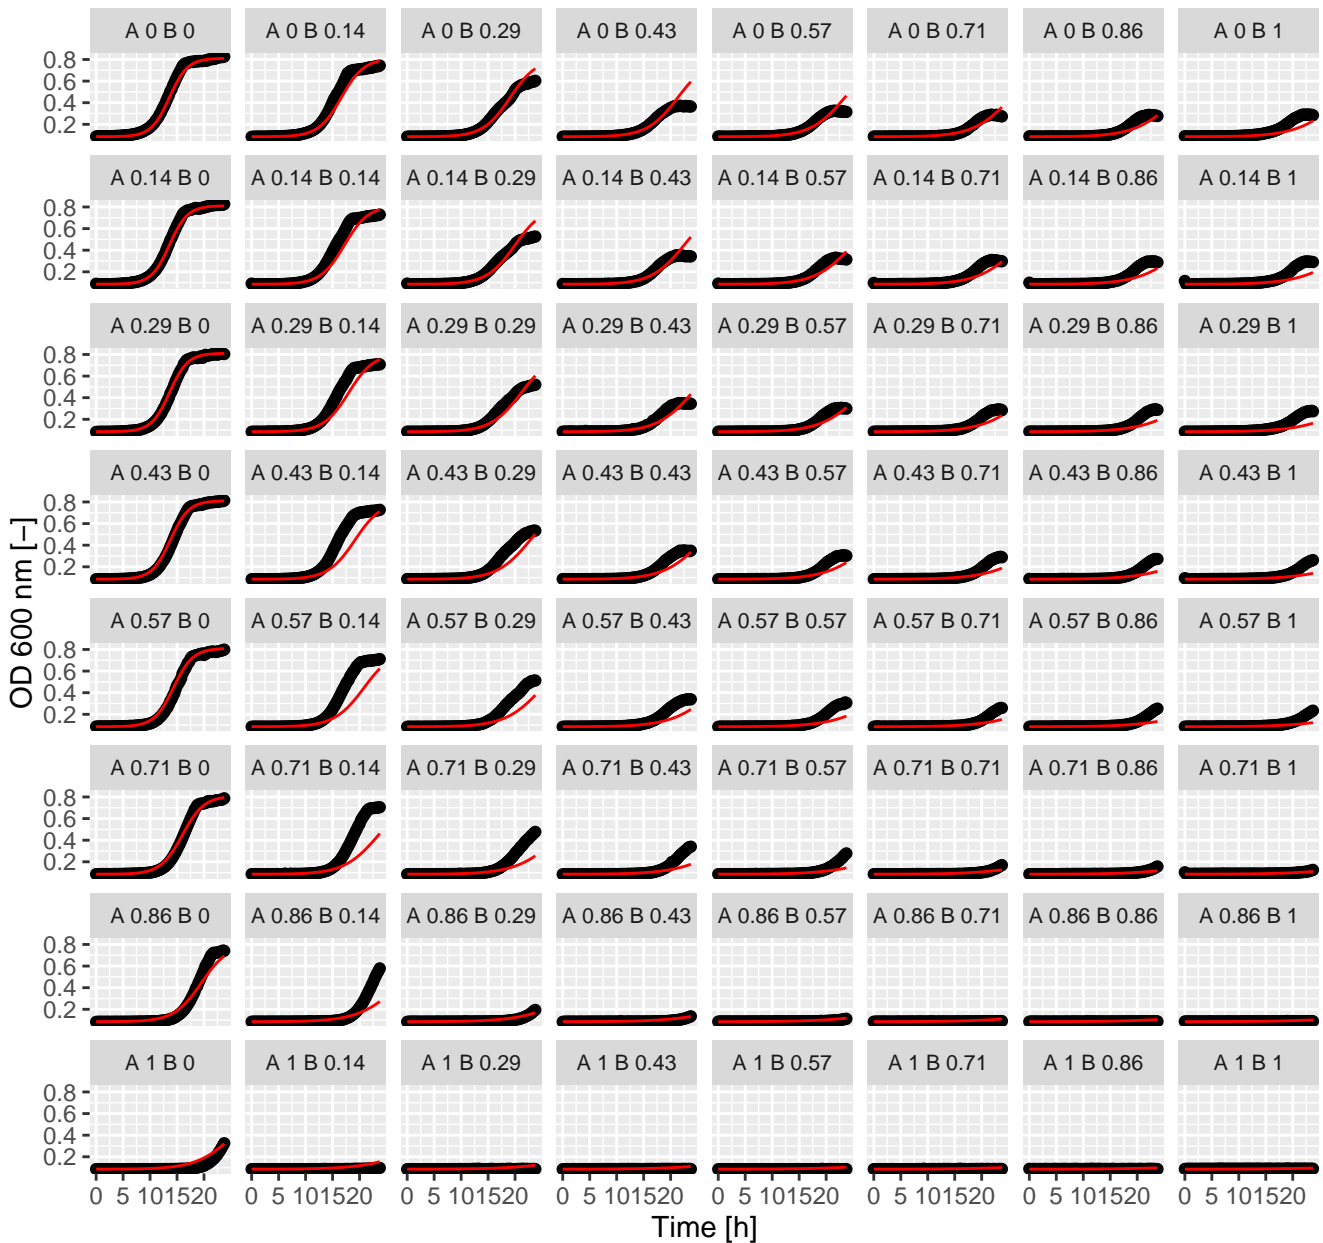

Bro.Ter (= Ax.Bx) full GPDI  
 Int\_AB = -0.11 and Int\_BA = 1.56 at EC50

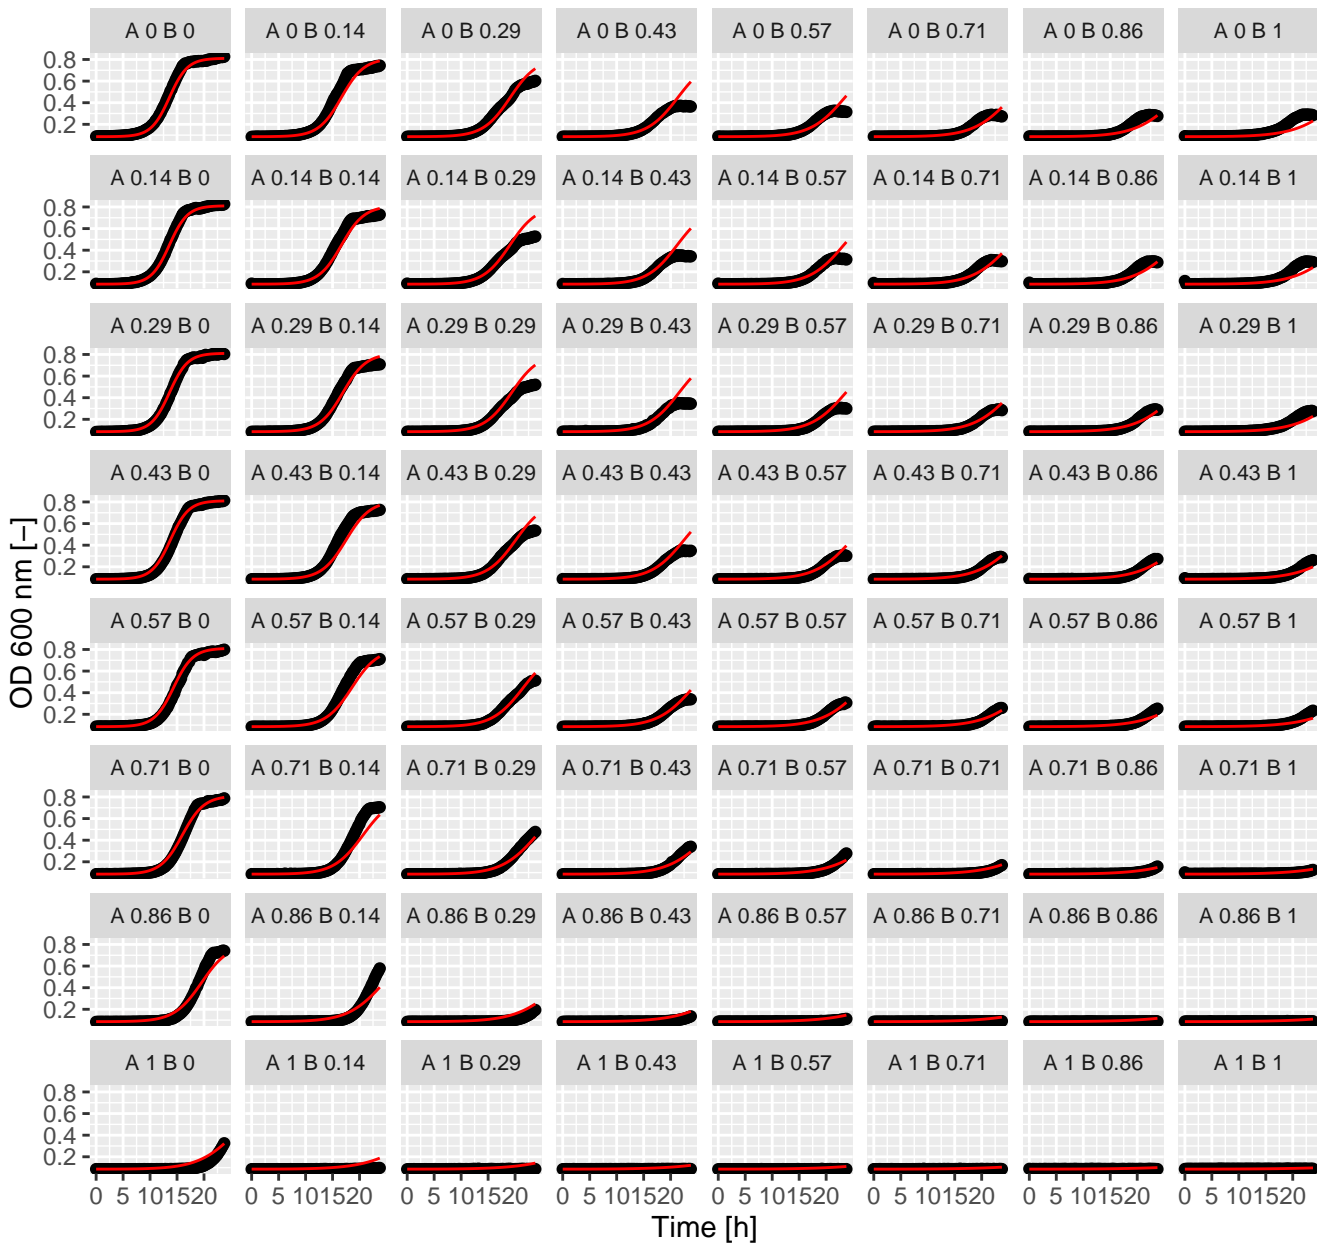



Bro.Tun (= Ax.Bx) exp. additivity (LA)  
Int\_AB = 0 and Int\_BA = 0 at EC50

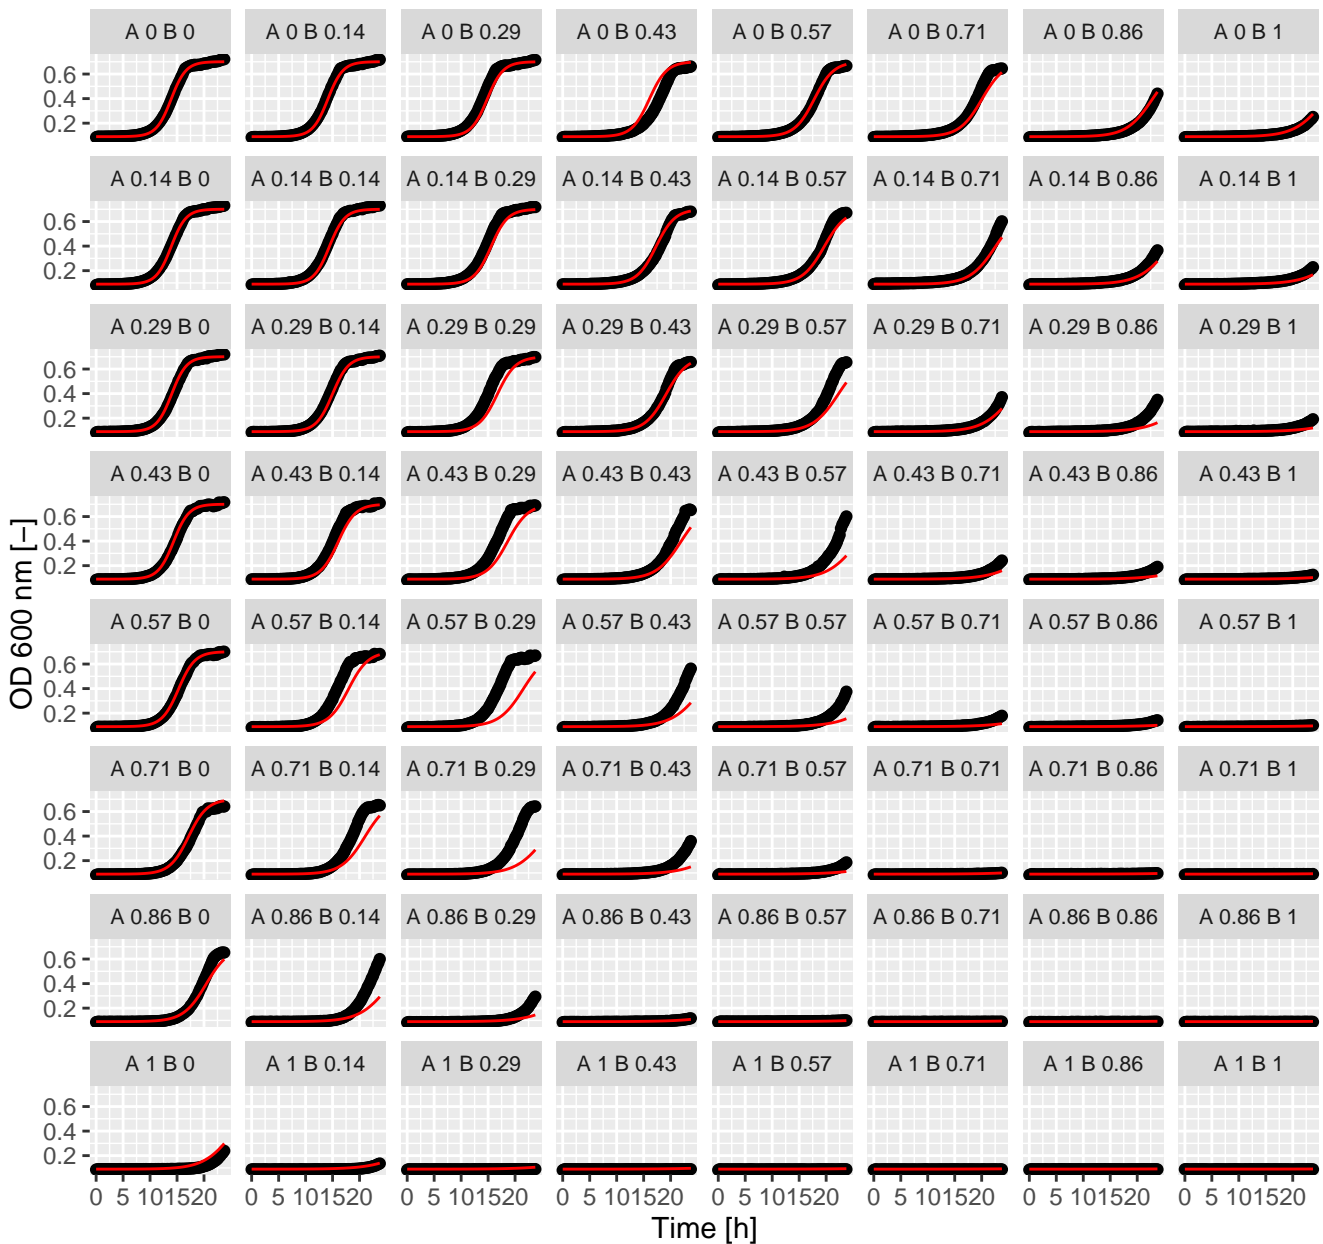

Bro.Tun (= Ax.Bx) full GPDI  
Int\_AB = 0.15 and Int\_BA = 0.32 at EC50

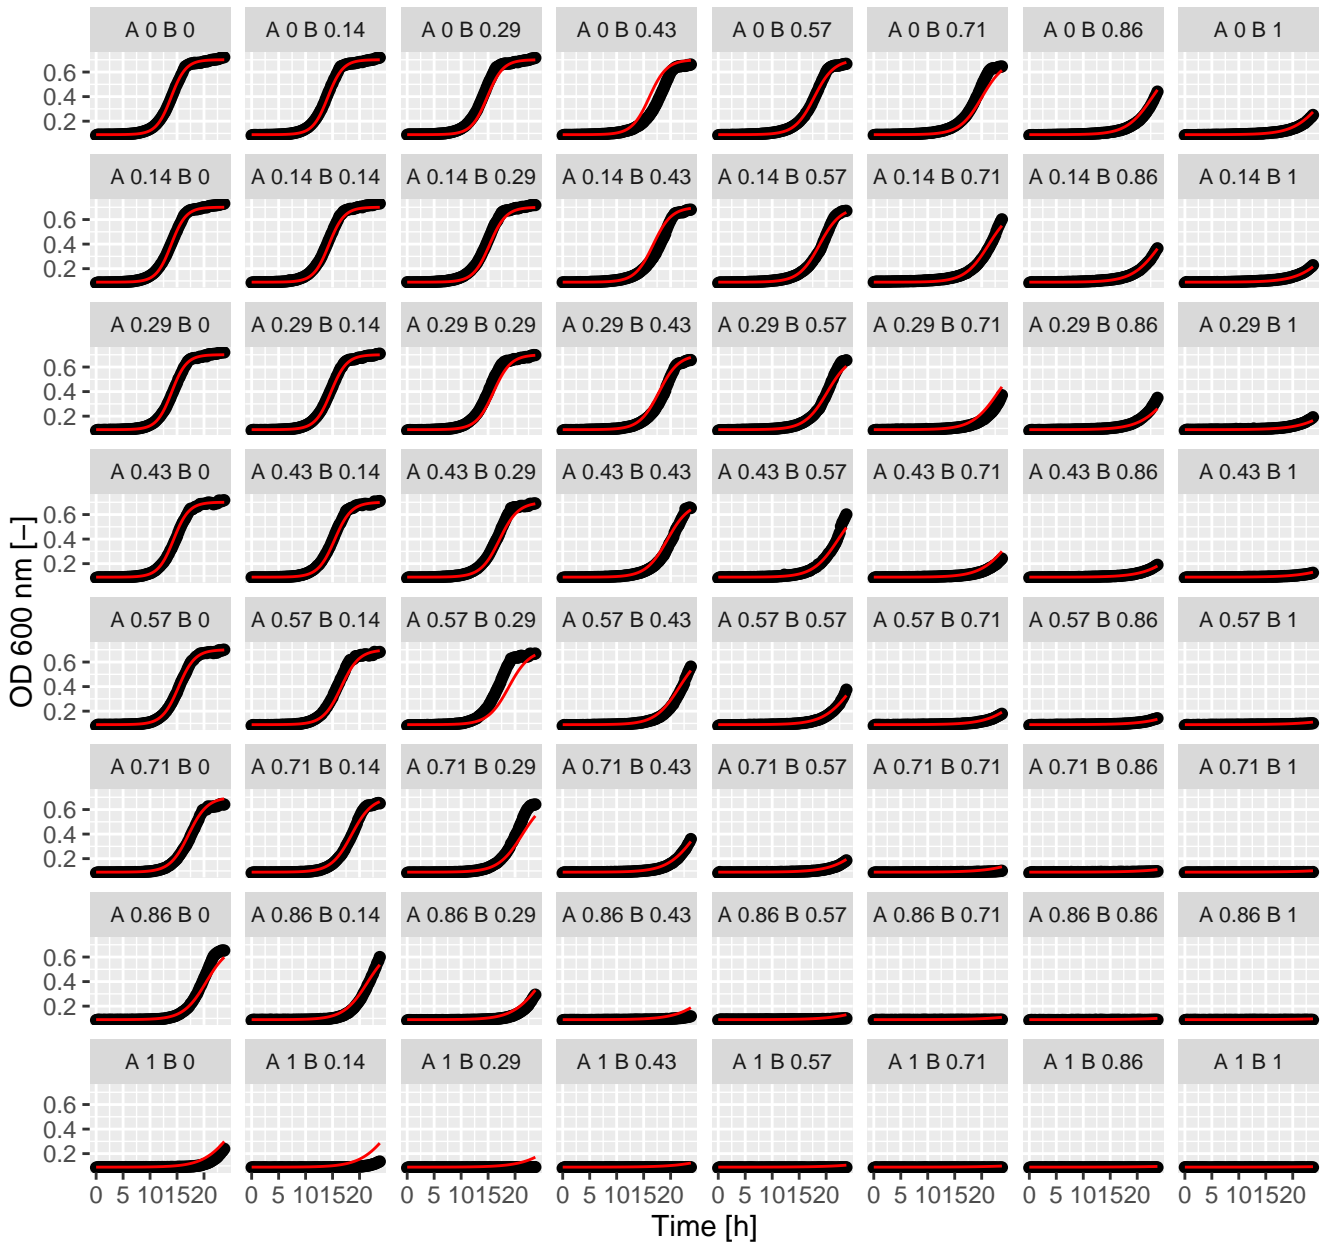

C3P.C3P (= Ax.Bx) exp. additivity (LA)  
Int\_AB = 0 and Int\_BA = 0 at EC50

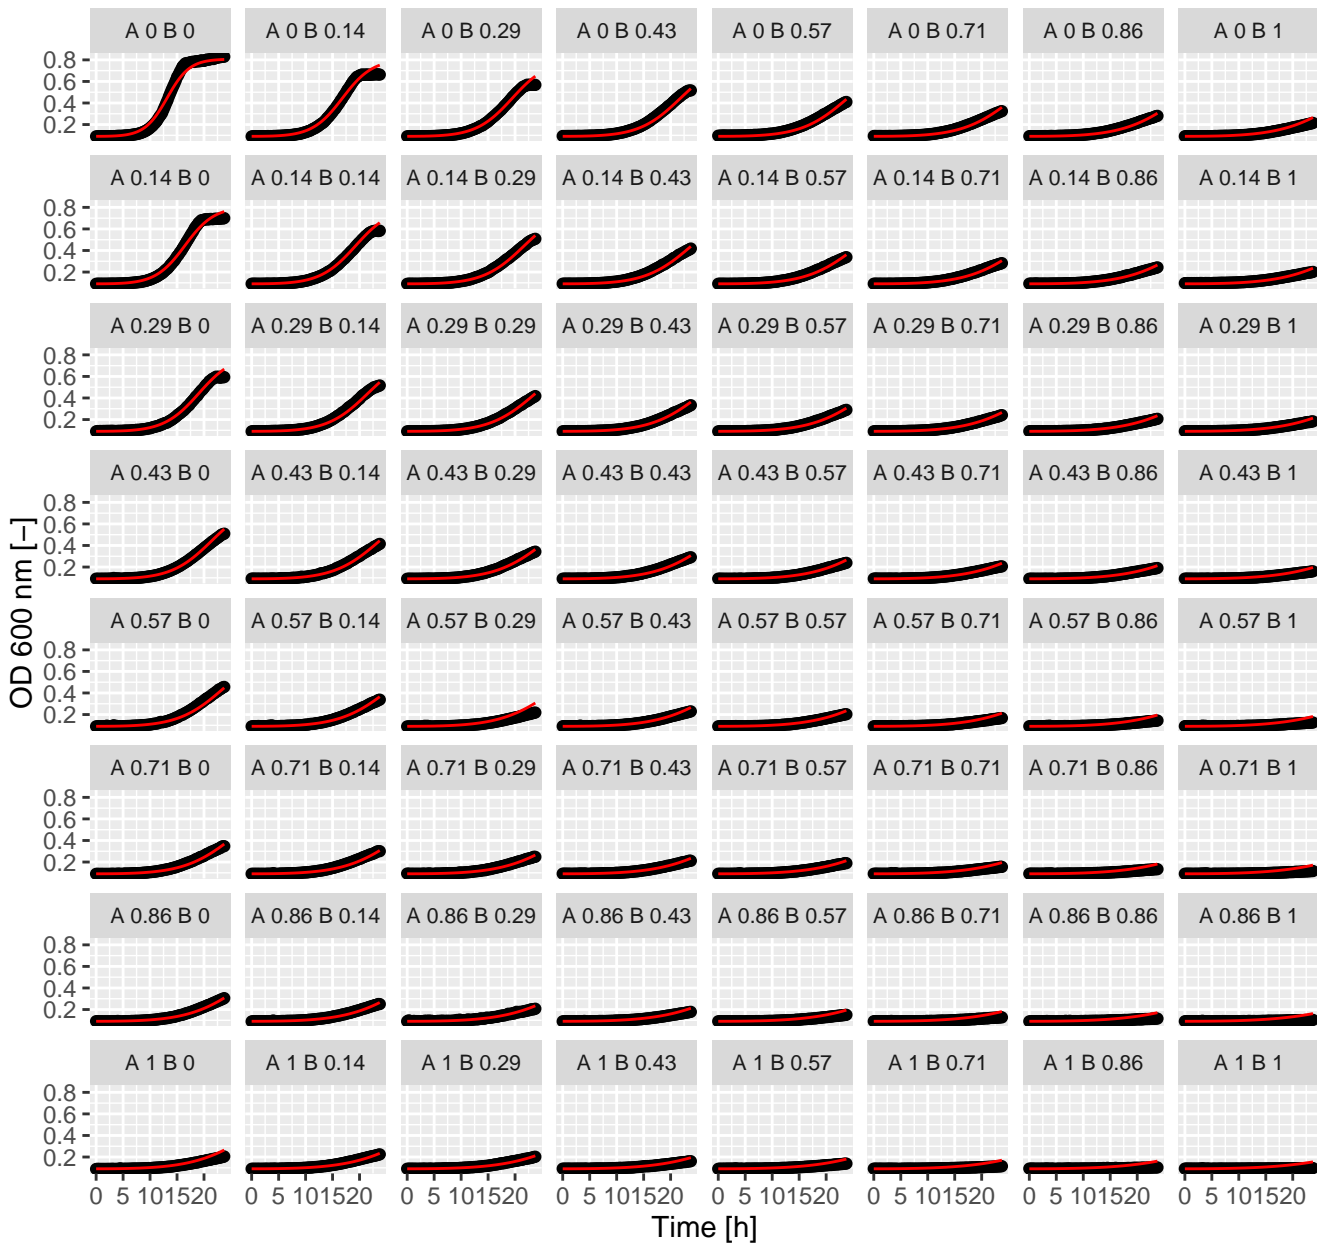

C3P.C3P (= Ax.Bx) full GPDI  
Int\_AB = -0.2 and Int\_BA = 0.02 at EC50

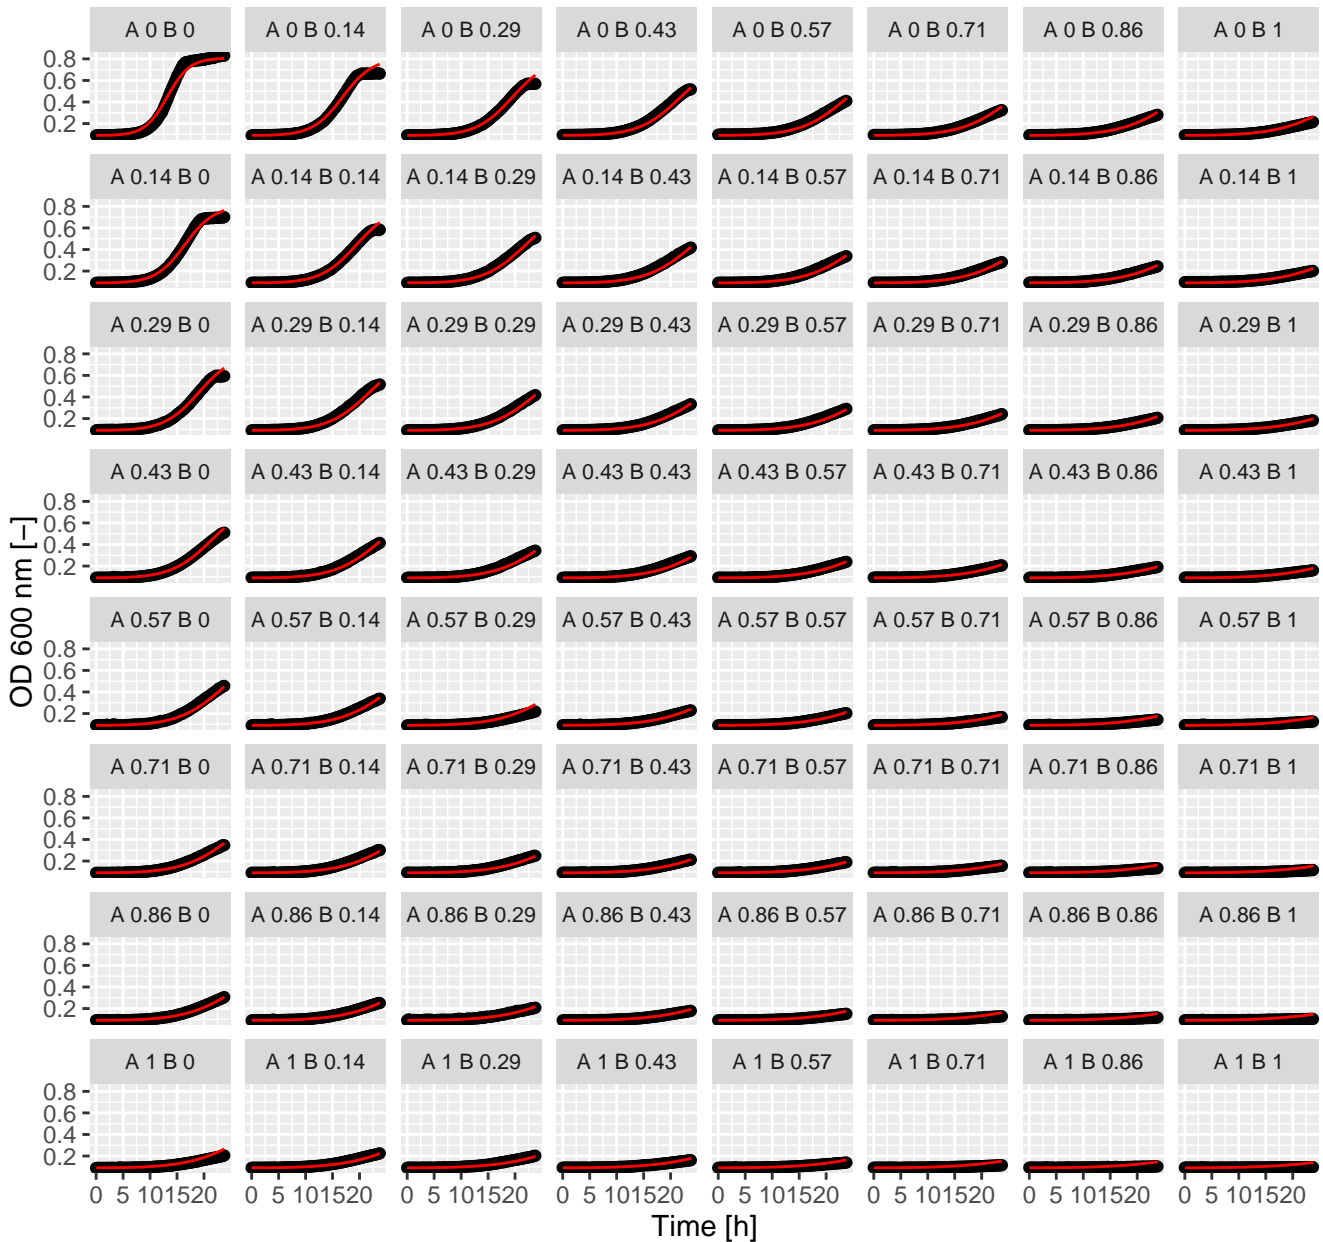

C3P.Lat (= Ax.Bx) exp. additivity (LA)  
Int\_AB = 0 and Int\_BA = 0 at EC50

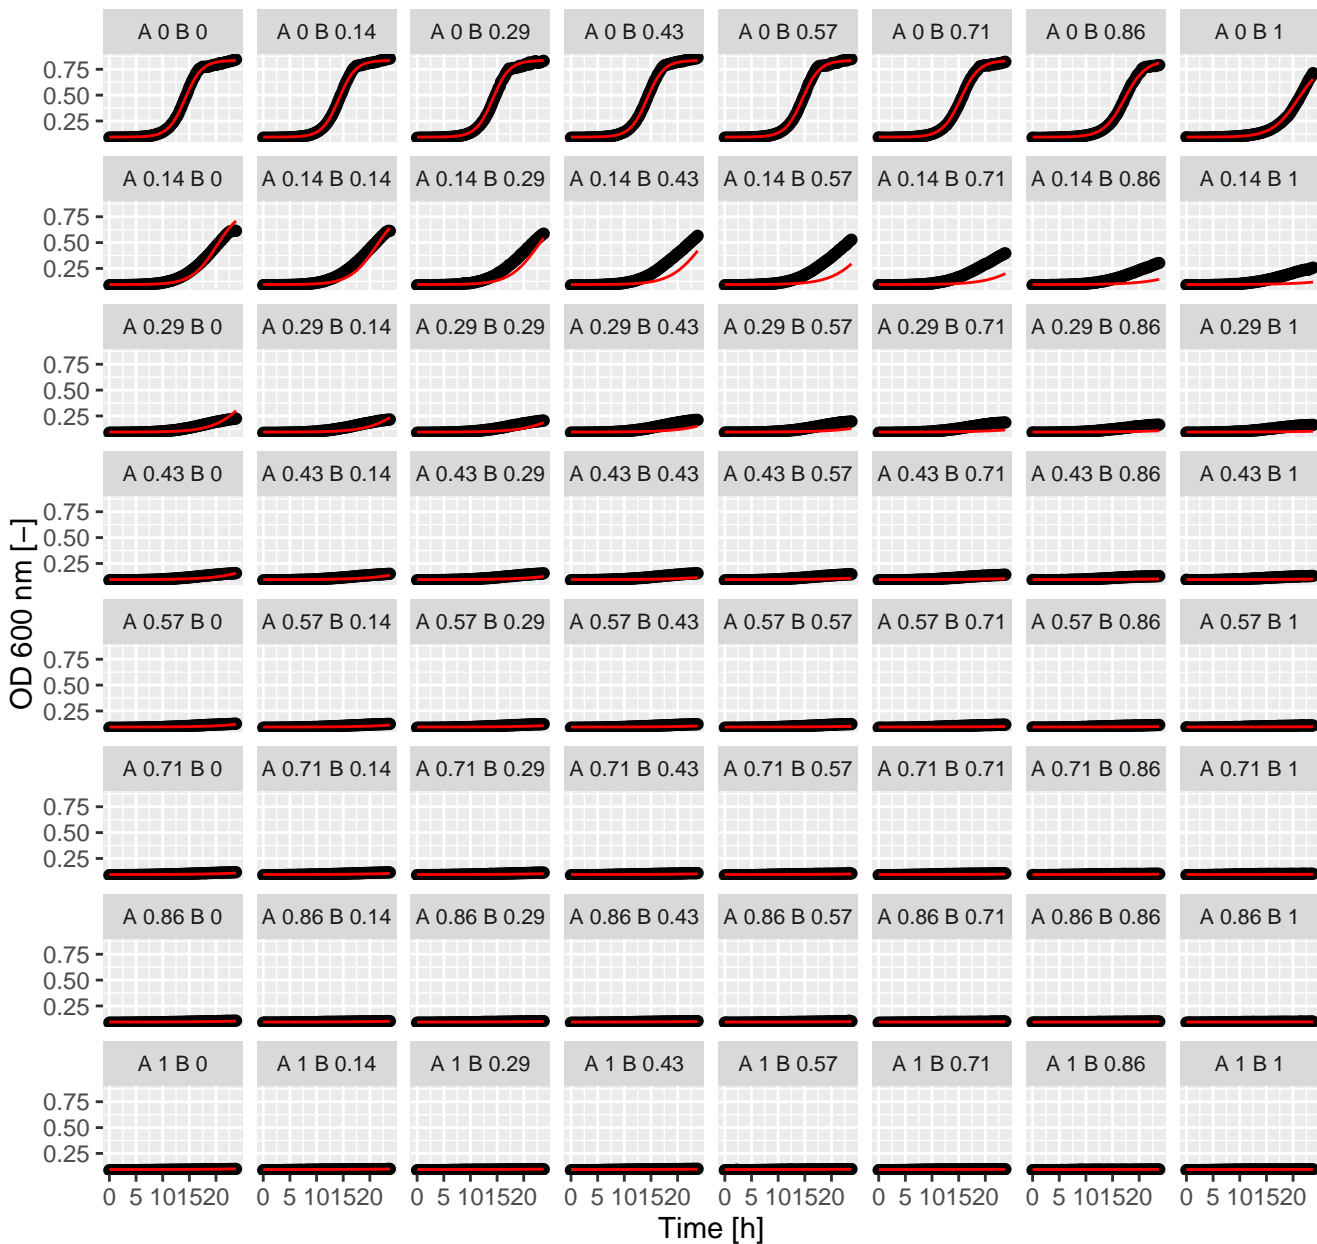

C3P.Lat (= Ax.Bx) full GPDI  
Int\_AB = 0.64 and Int\_BA = 0.55 at EC50

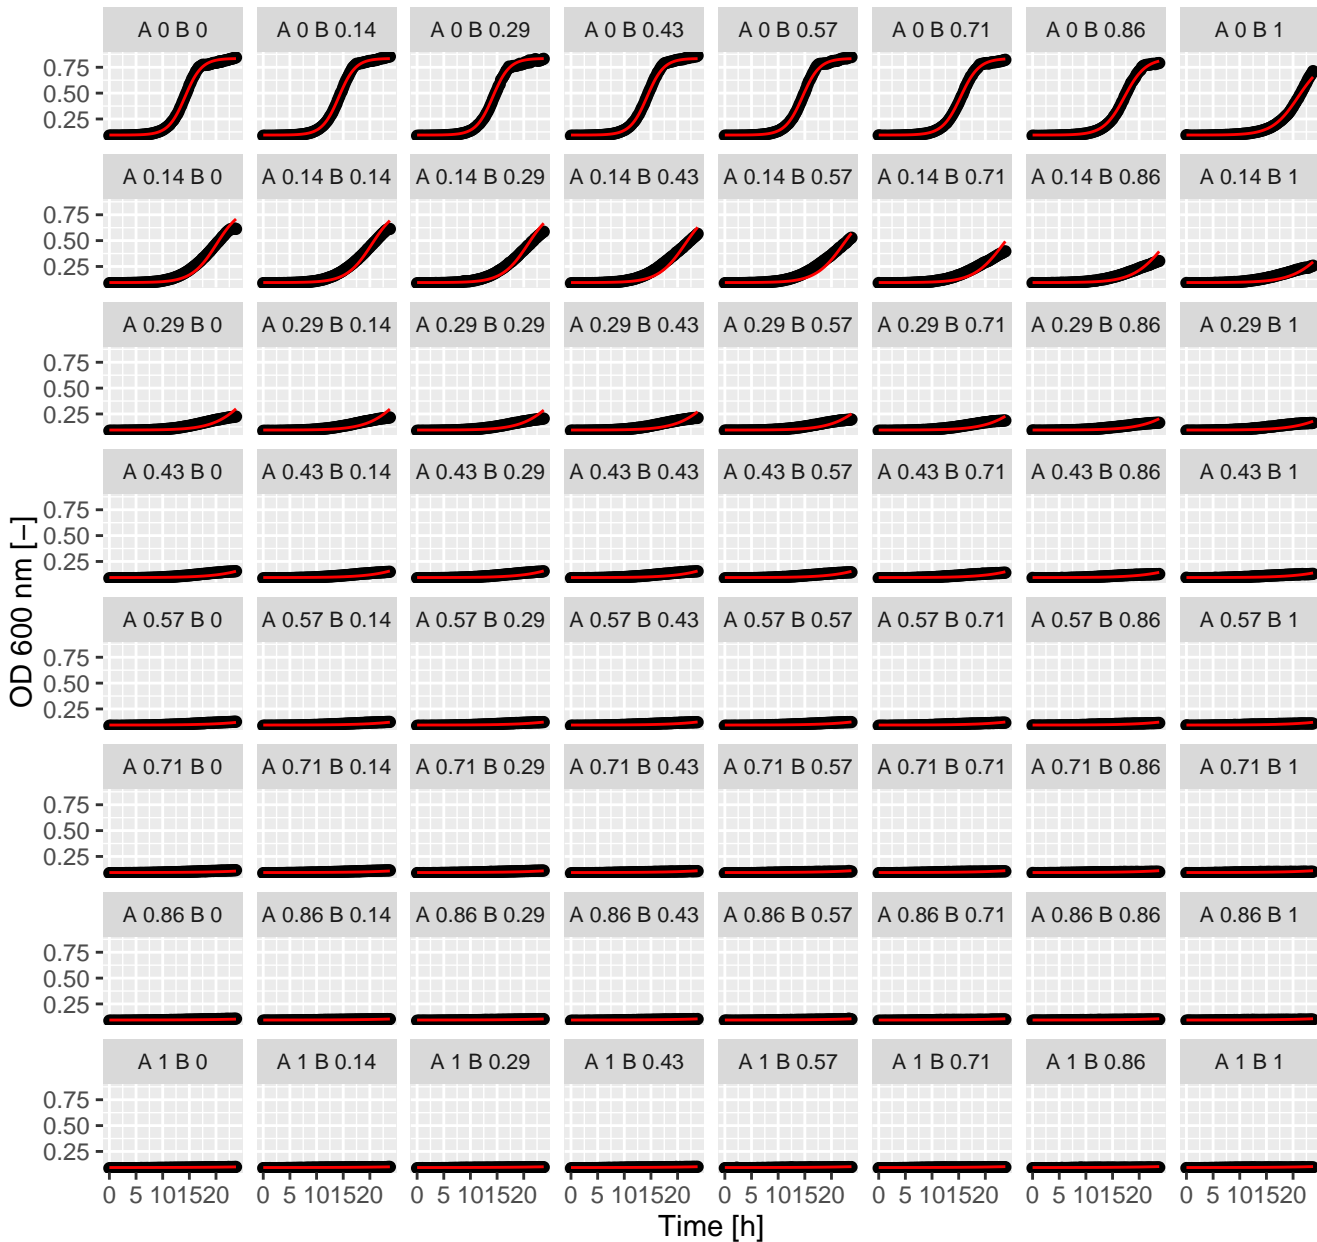

C3P.Pen (= Ax.Bx) exp. additivity (LA)  
Int\_AB = 0 and Int\_BA = 0 at EC50

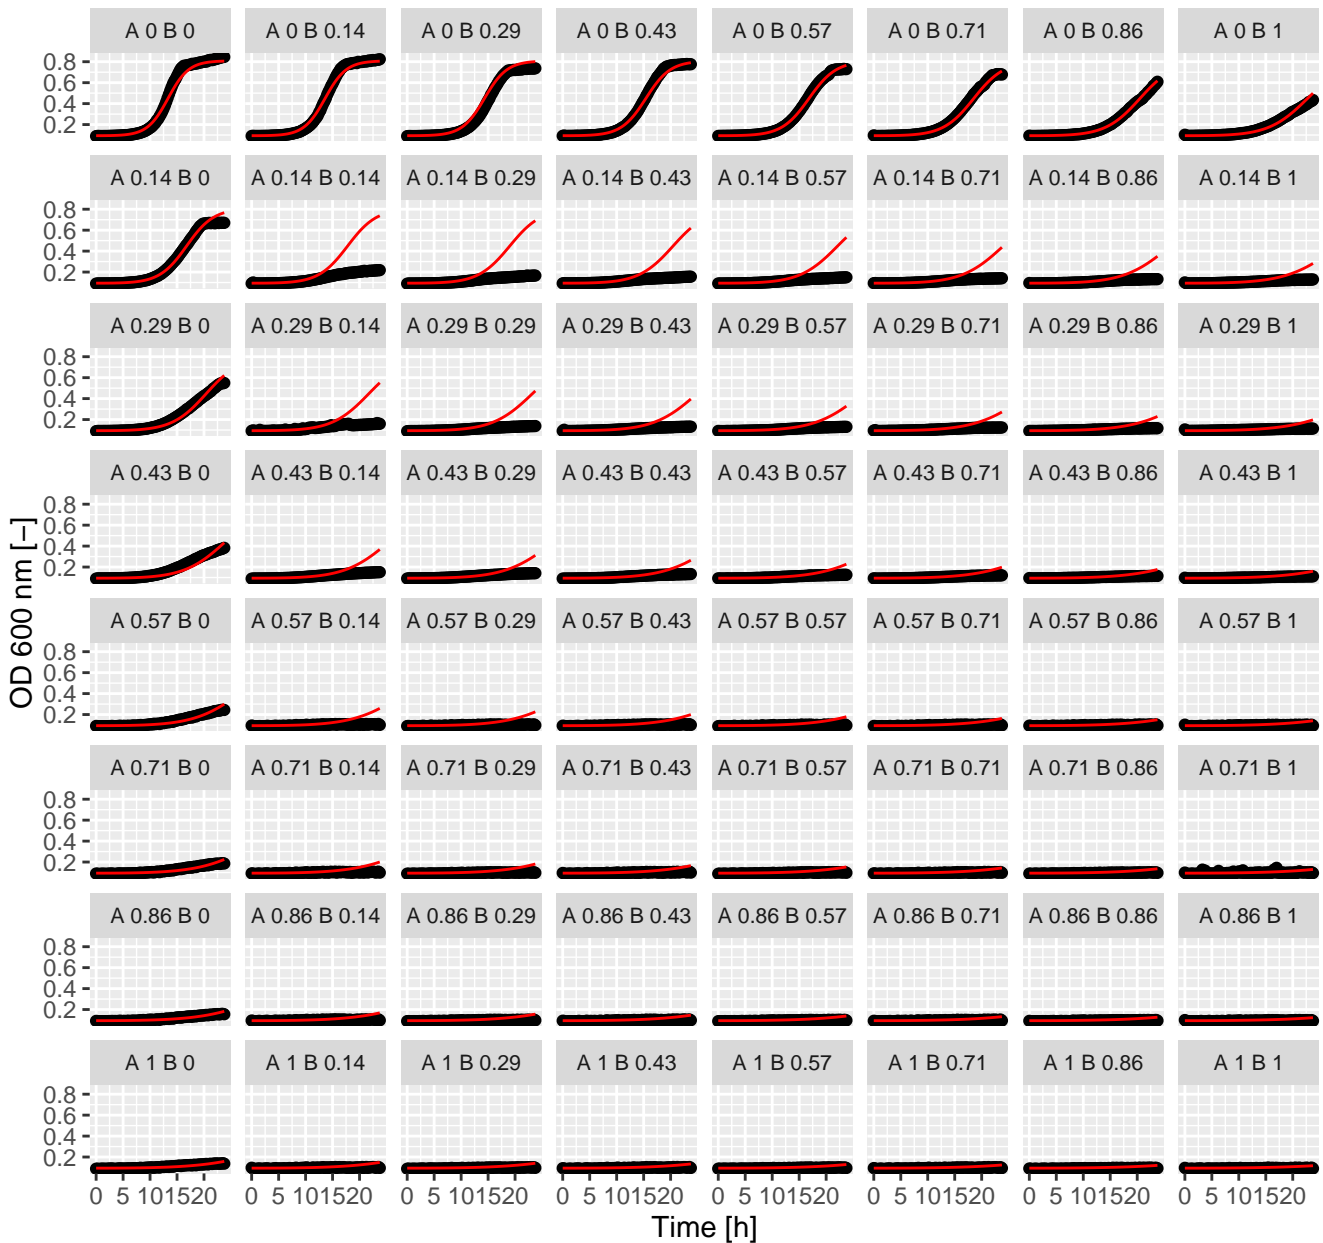

C3P.Pen (= Ax.Bx) full GPD1  
Int\_AB = -0.72 and Int\_BA = -0.24 at EC50

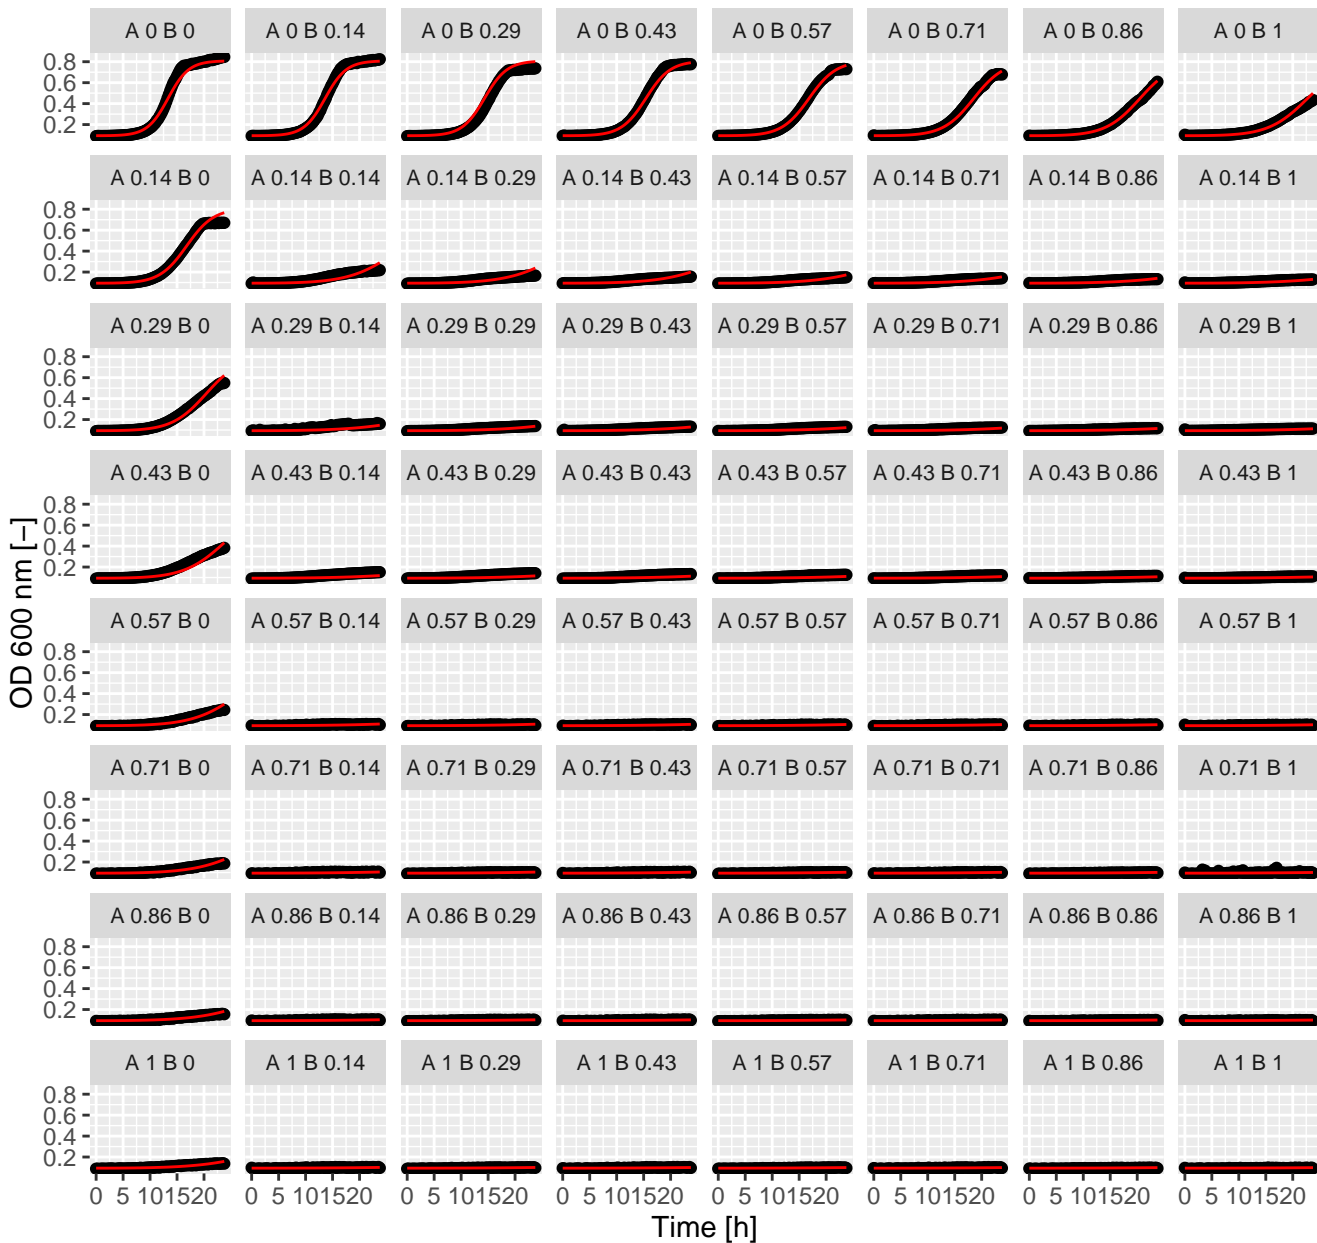



C3P.Sta (= Ax.Bx) exp. additivity (LA)  
Int\_AB = 0 and Int\_BA = 0 at EC50

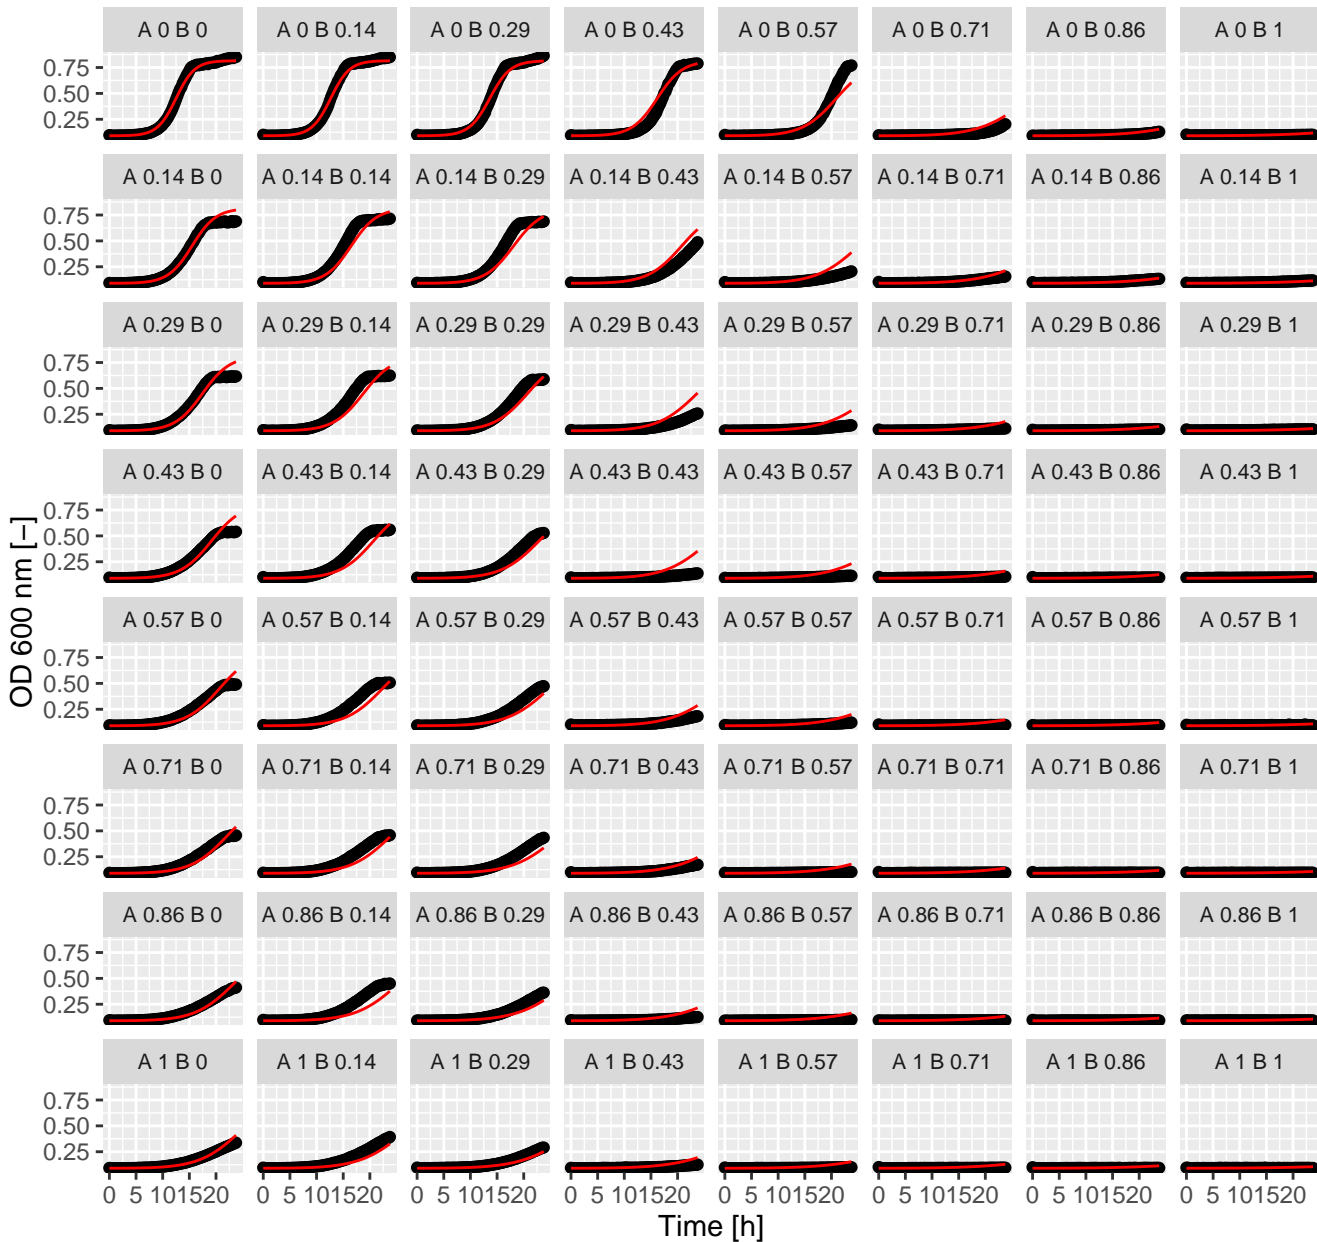

C3P.Sta (= Ax.Bx) full GPDI  
Int\_AB = 4.16 and Int\_BA = -0.42 at EC50

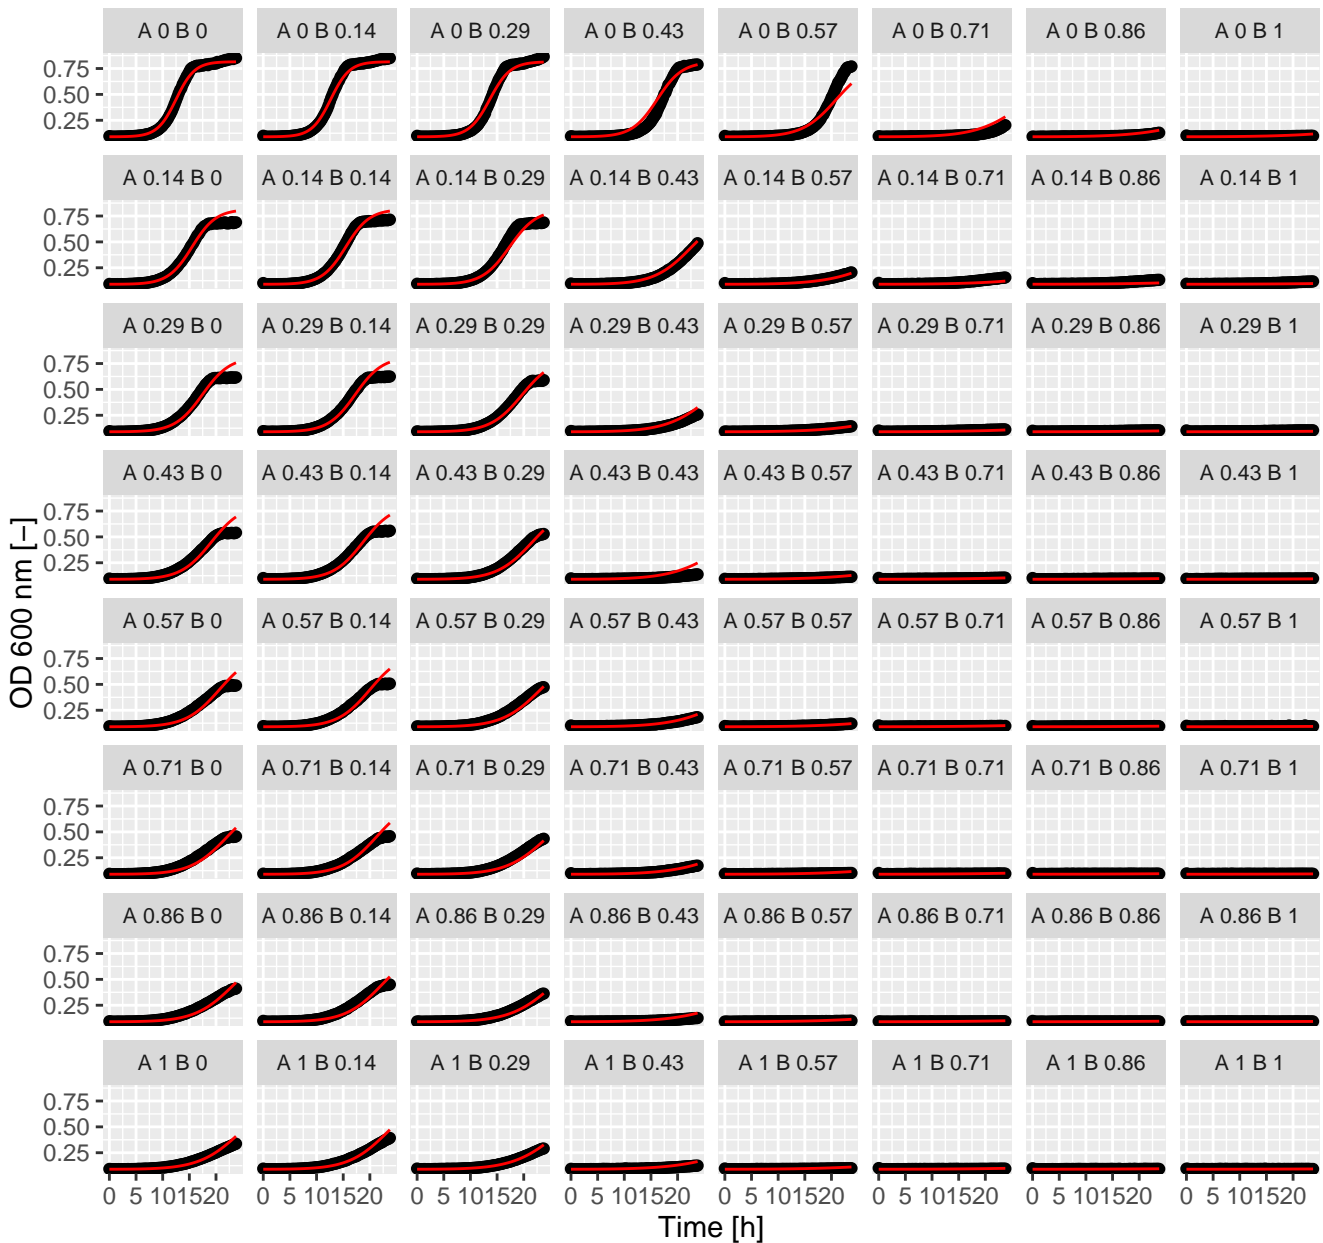

C3P.Tac (= Ax.Bx) exp. additivity (LA)  
Int\_AB = 0 and Int\_BA = 0 at EC50

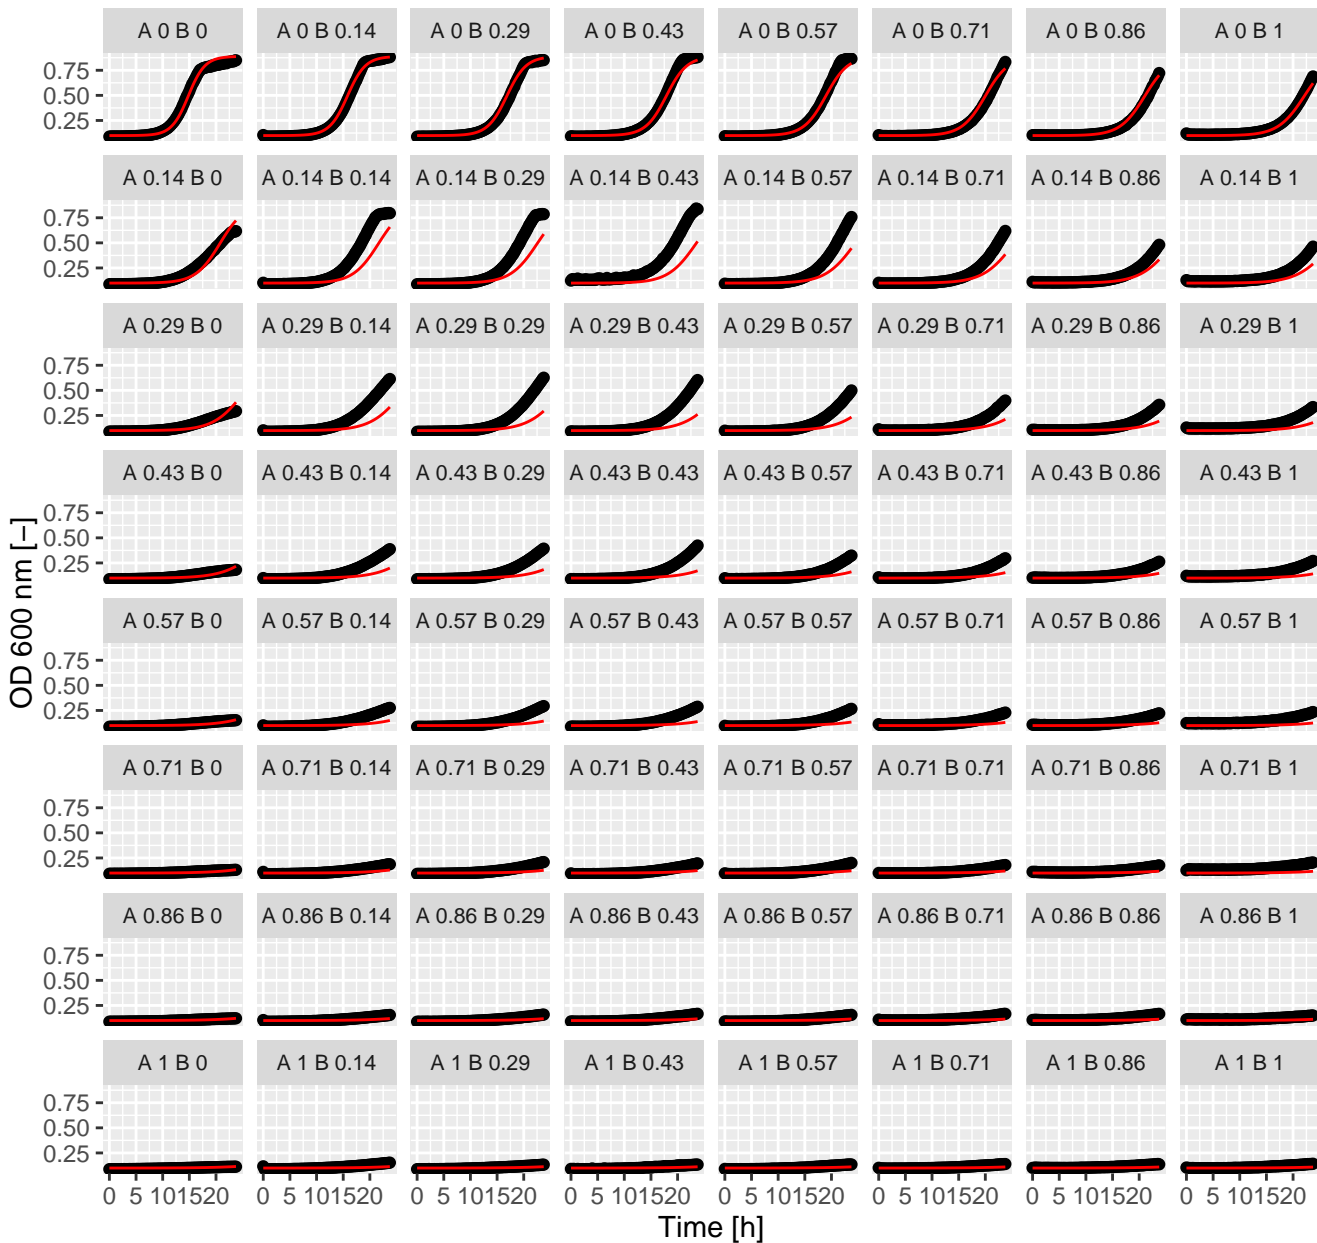

C3P.Tac (= Ax.Bx) full GPDI  
Int\_AB = 1.43 and Int\_BA = 0.12 at EC50

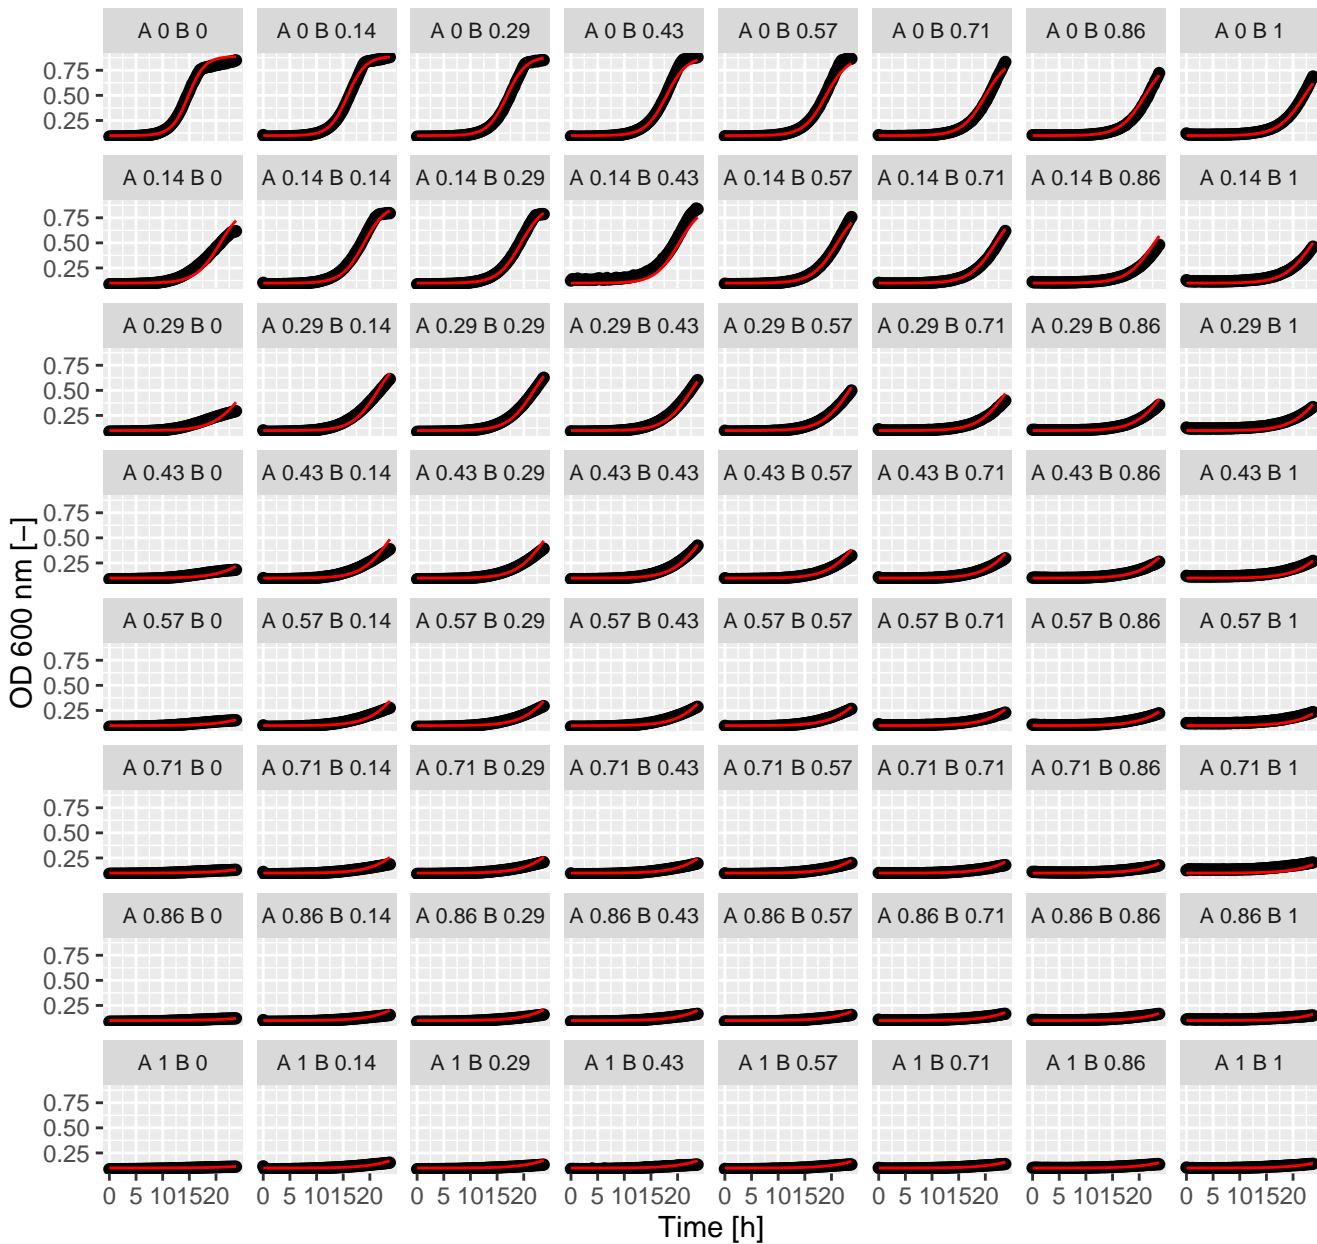

C3P.Ter (= Ax.Bx) exp. additivity (LA)  
Int\_AB = 0 and Int\_BA = 0 at EC50

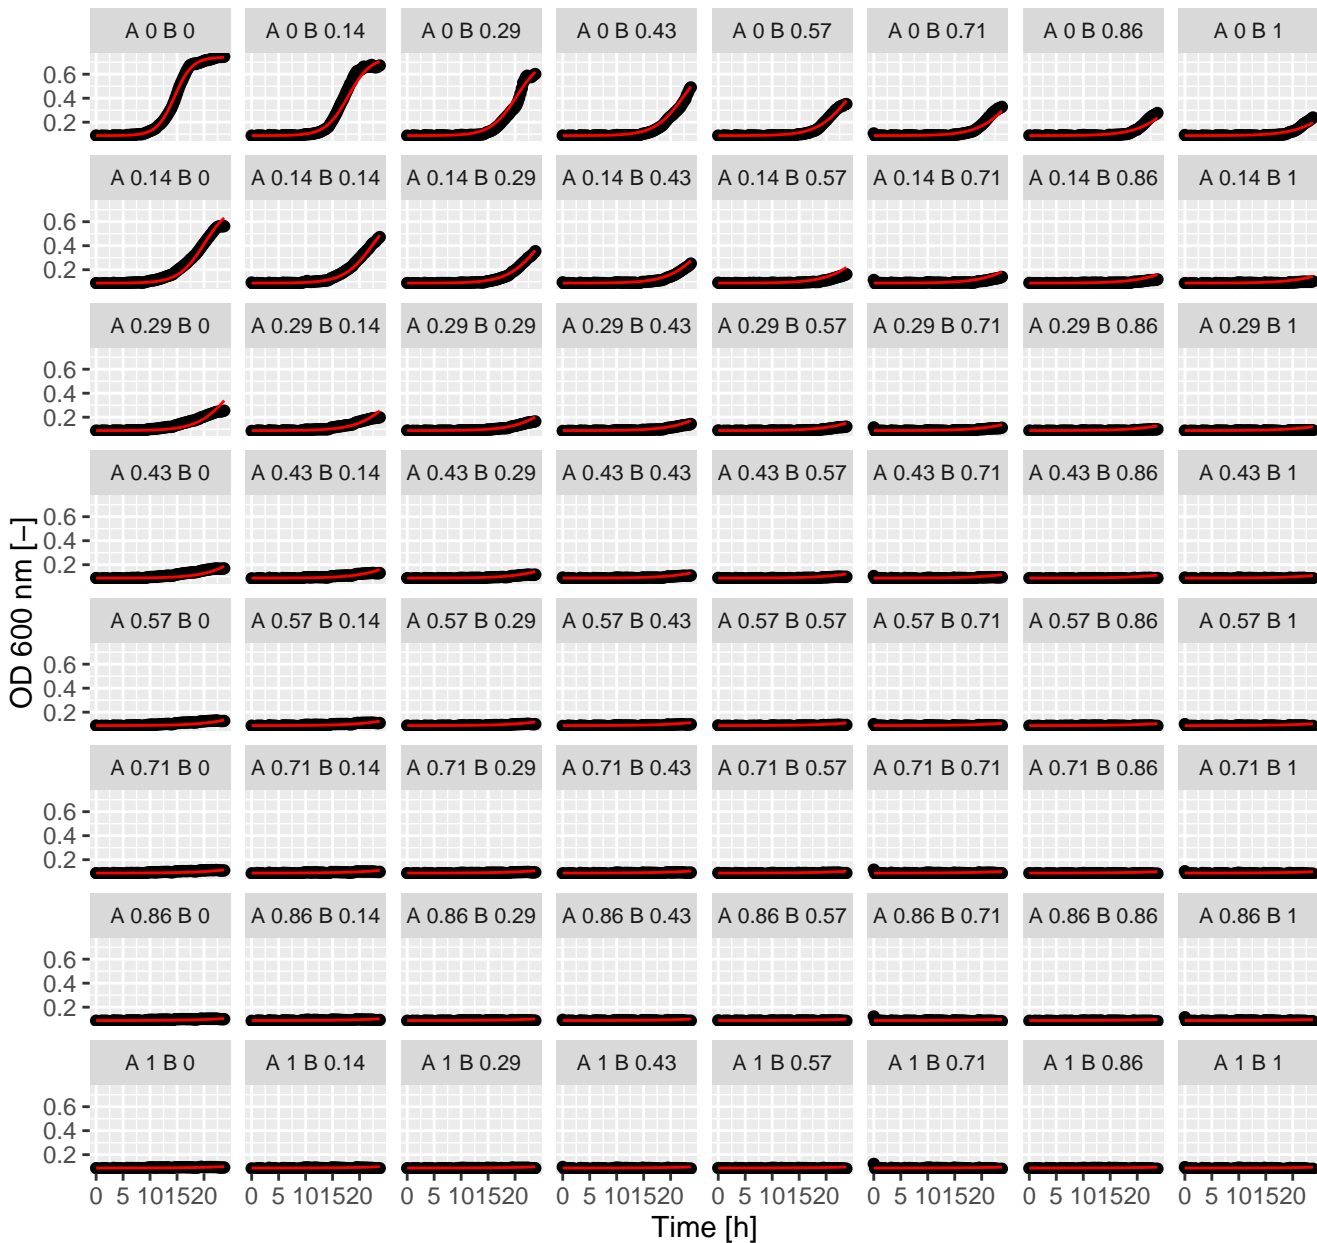

C3P.Ter (= Ax.Bx) full GPDI  
Int\_AB = -0.62 and Int\_BA = 2.61 at EC50

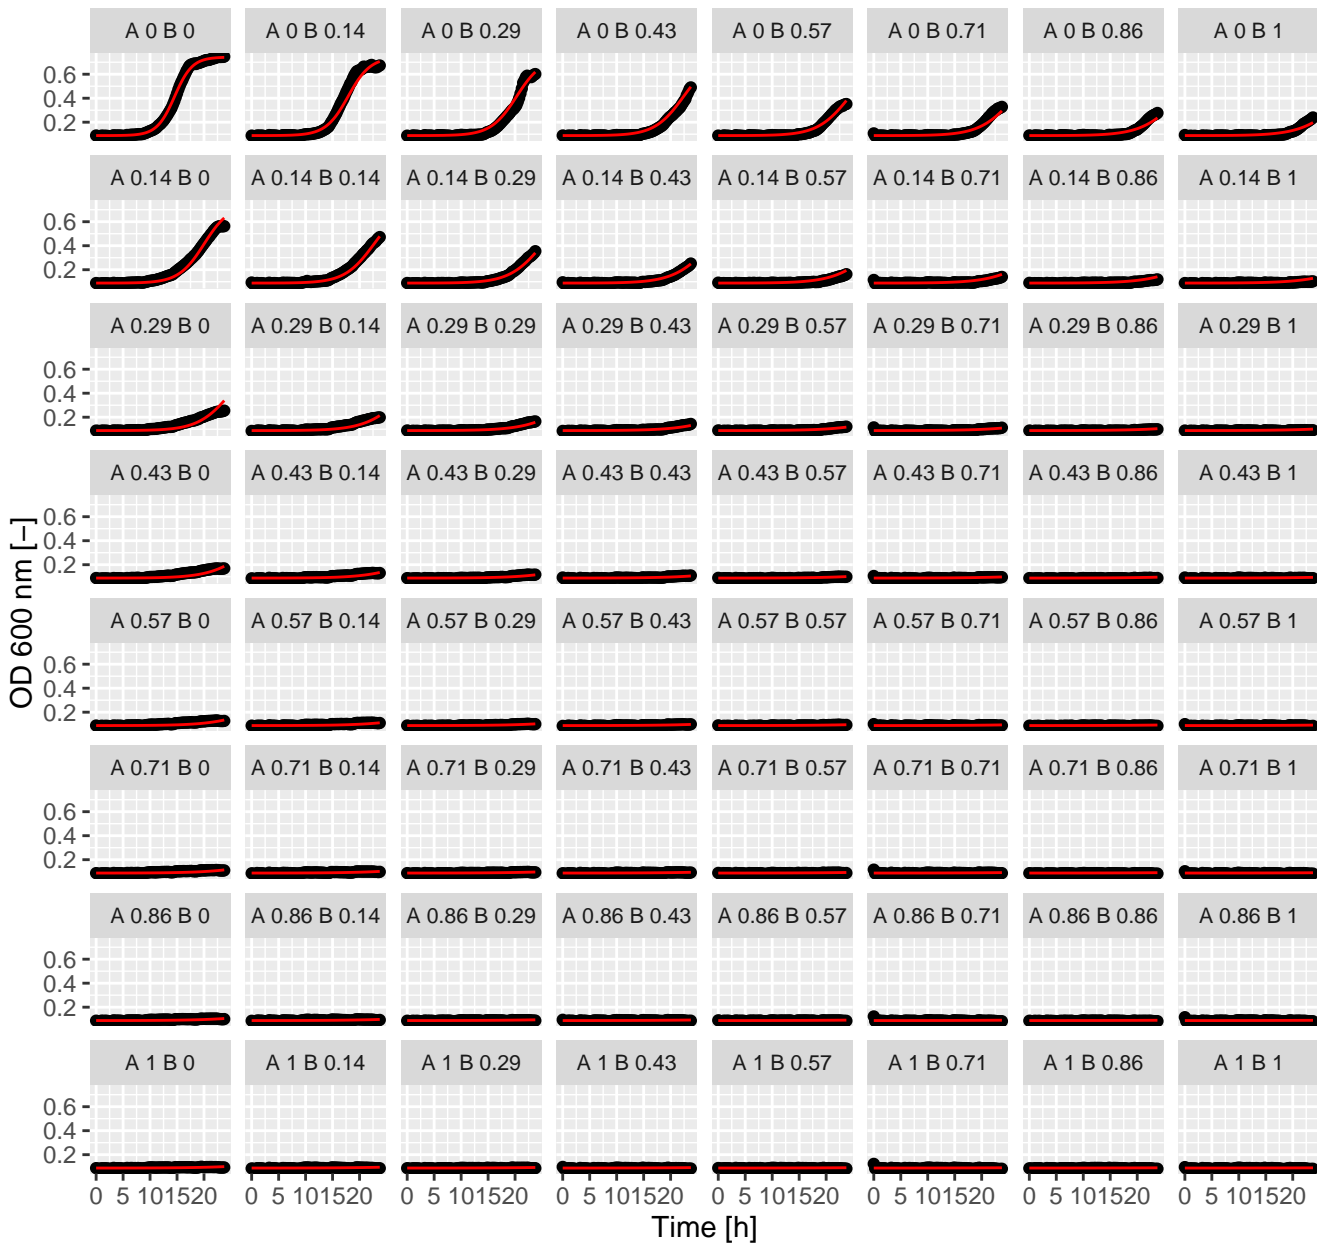

Cal.Cal (= Ax.Bx) exp. additivity (LA)  
 Int\_AB = 0 and Int\_BA = 0 at EC50

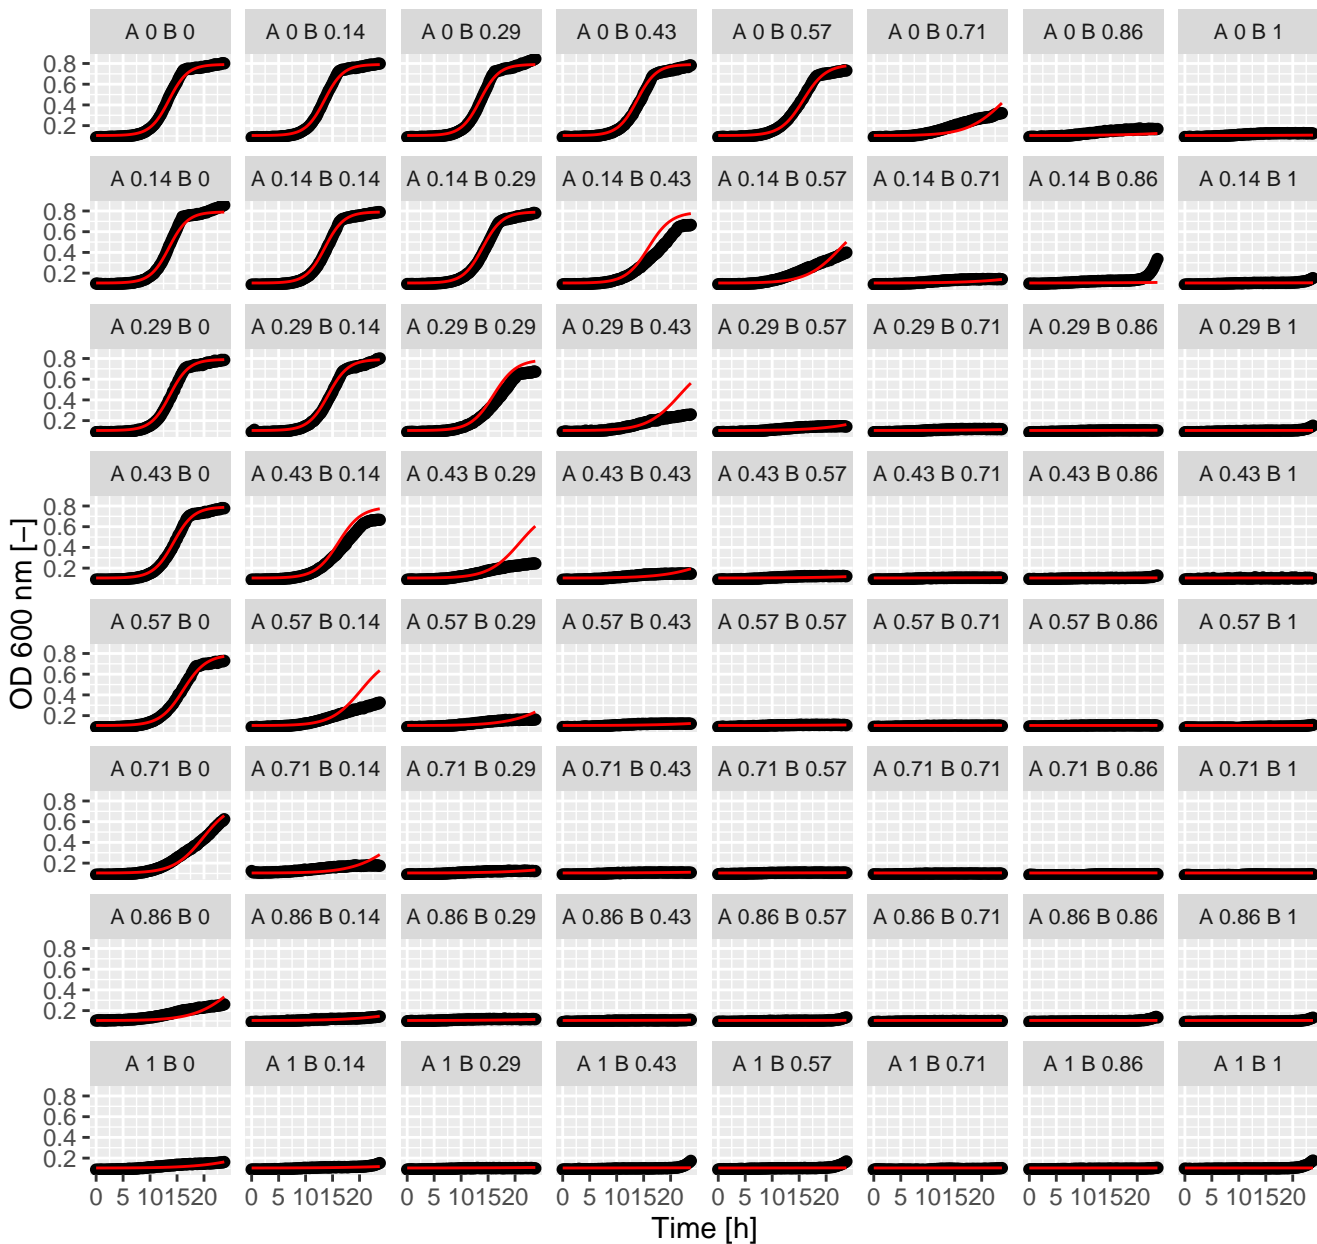

Cal.Cal (= Ax.Bx) full GPDI  
 Int\_AB = -0.41 and Int\_BA = 0.62 at EC50

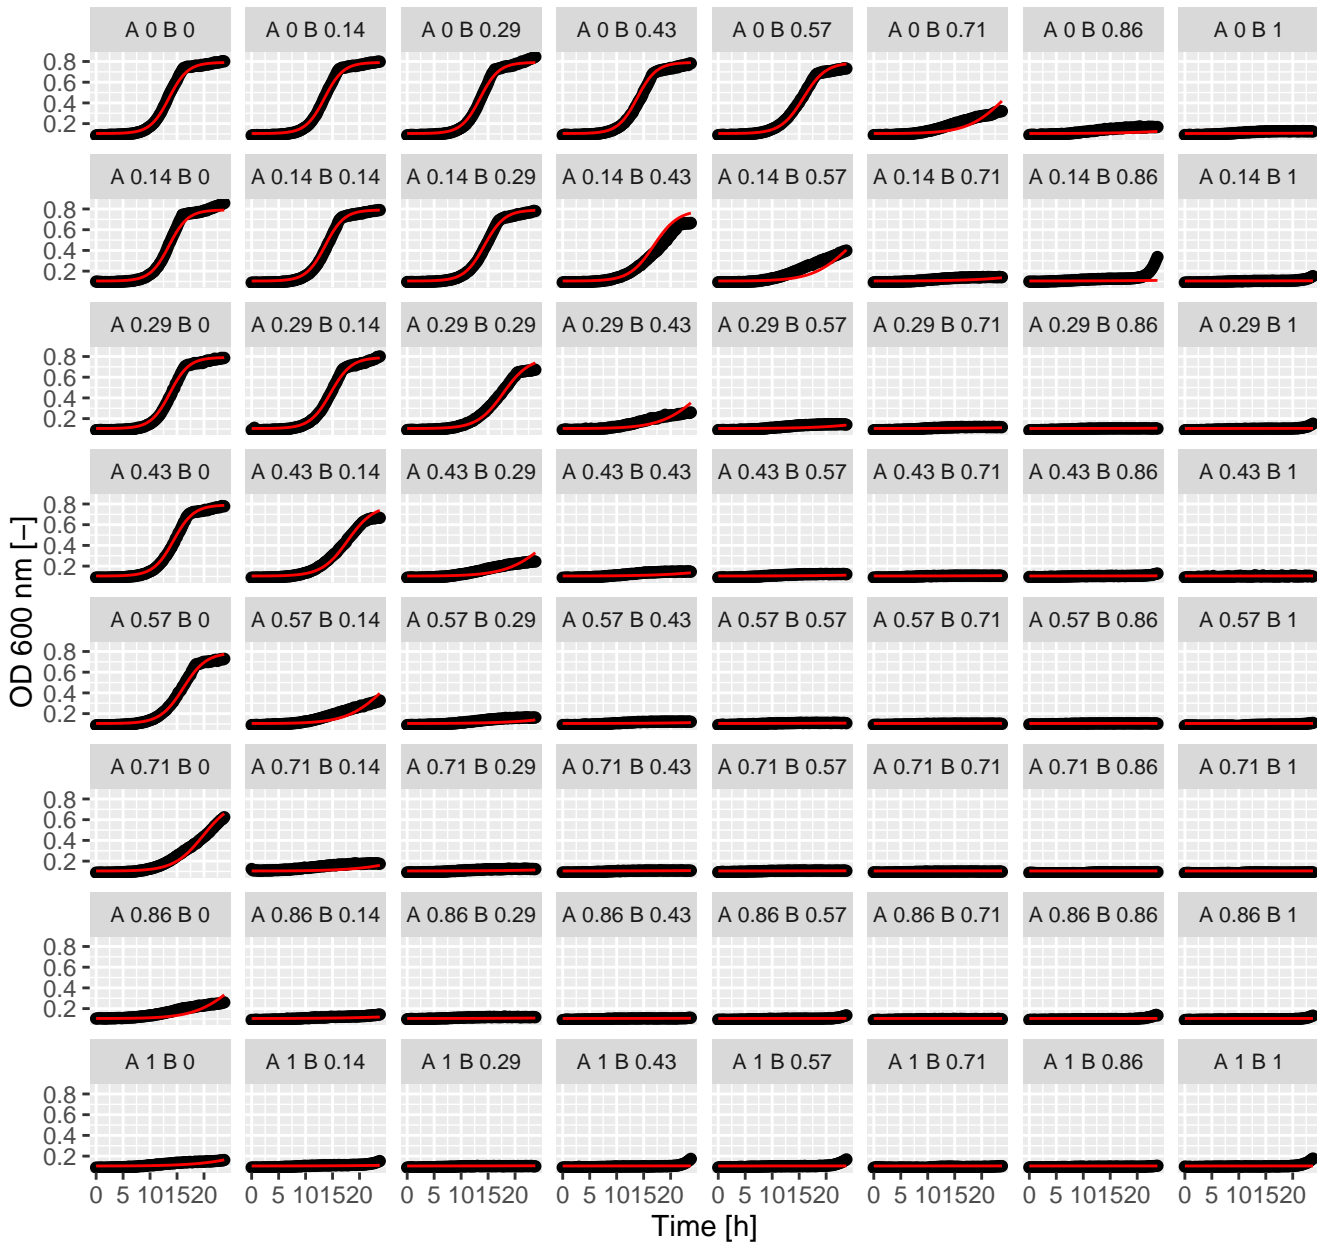



Cal.Dyc (= Ax.Bx) exp. additivity (LA)  
 Int\_AB = 0 and Int\_BA = 0 at EC50

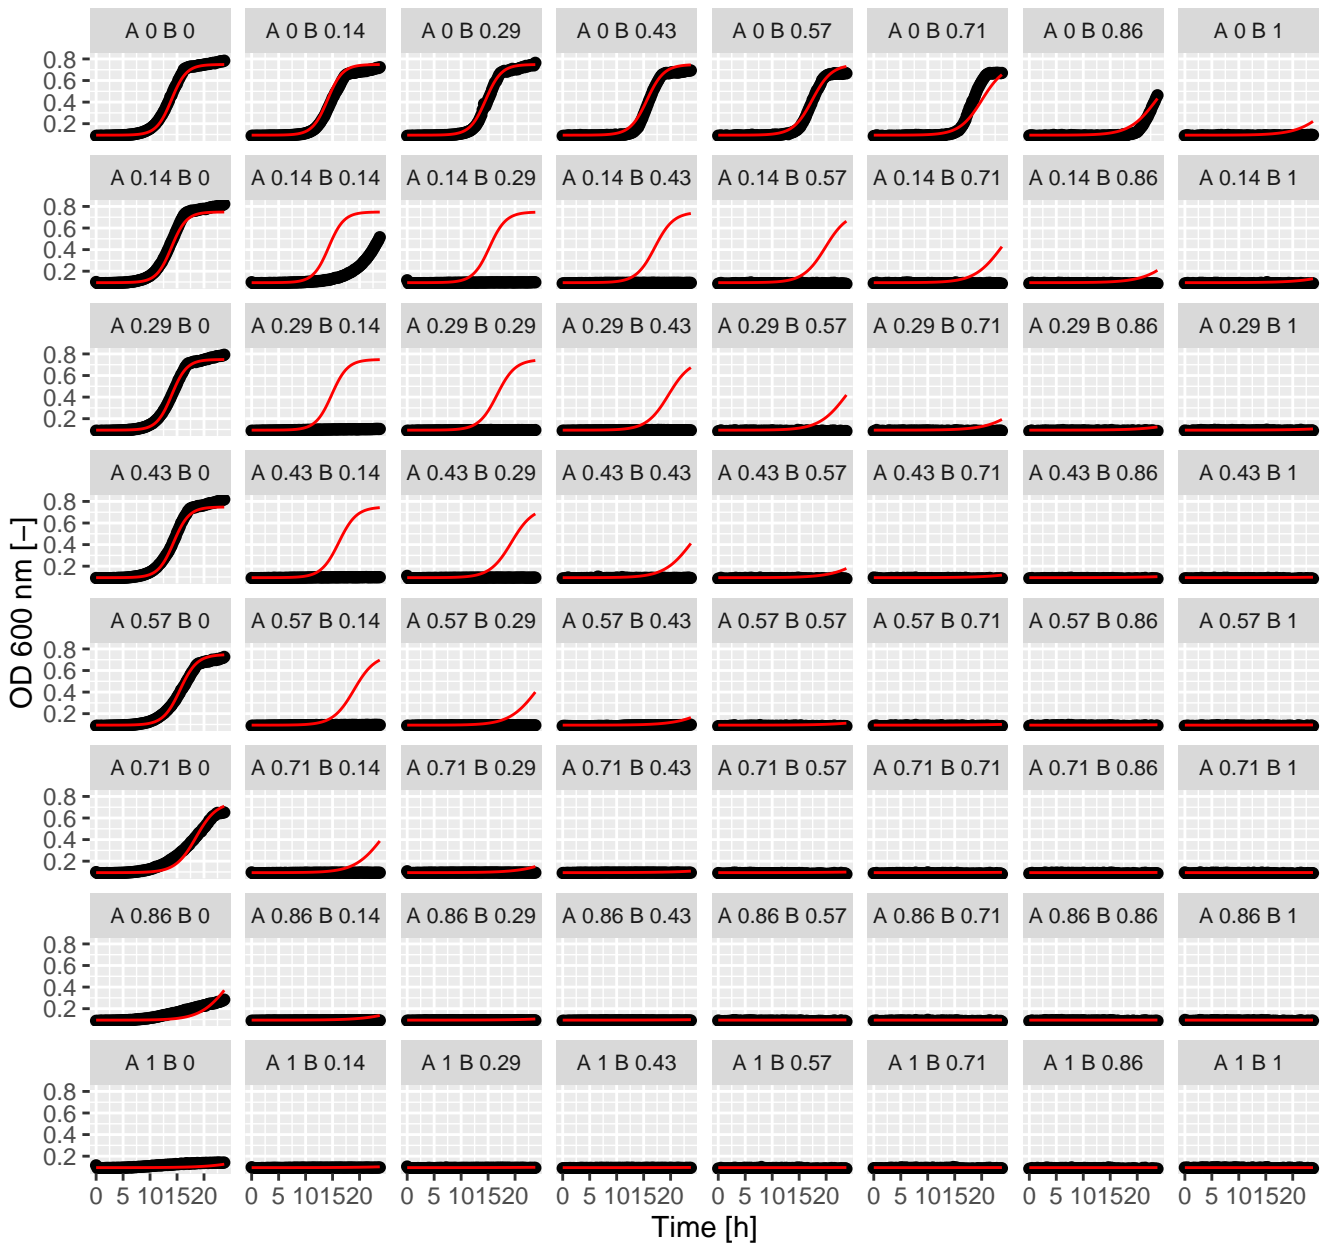

Cal.Dyc (= Ax.Bx) full GPDI  
 Int\_AB = -0.89 and Int\_BA = -0.72 at EC50

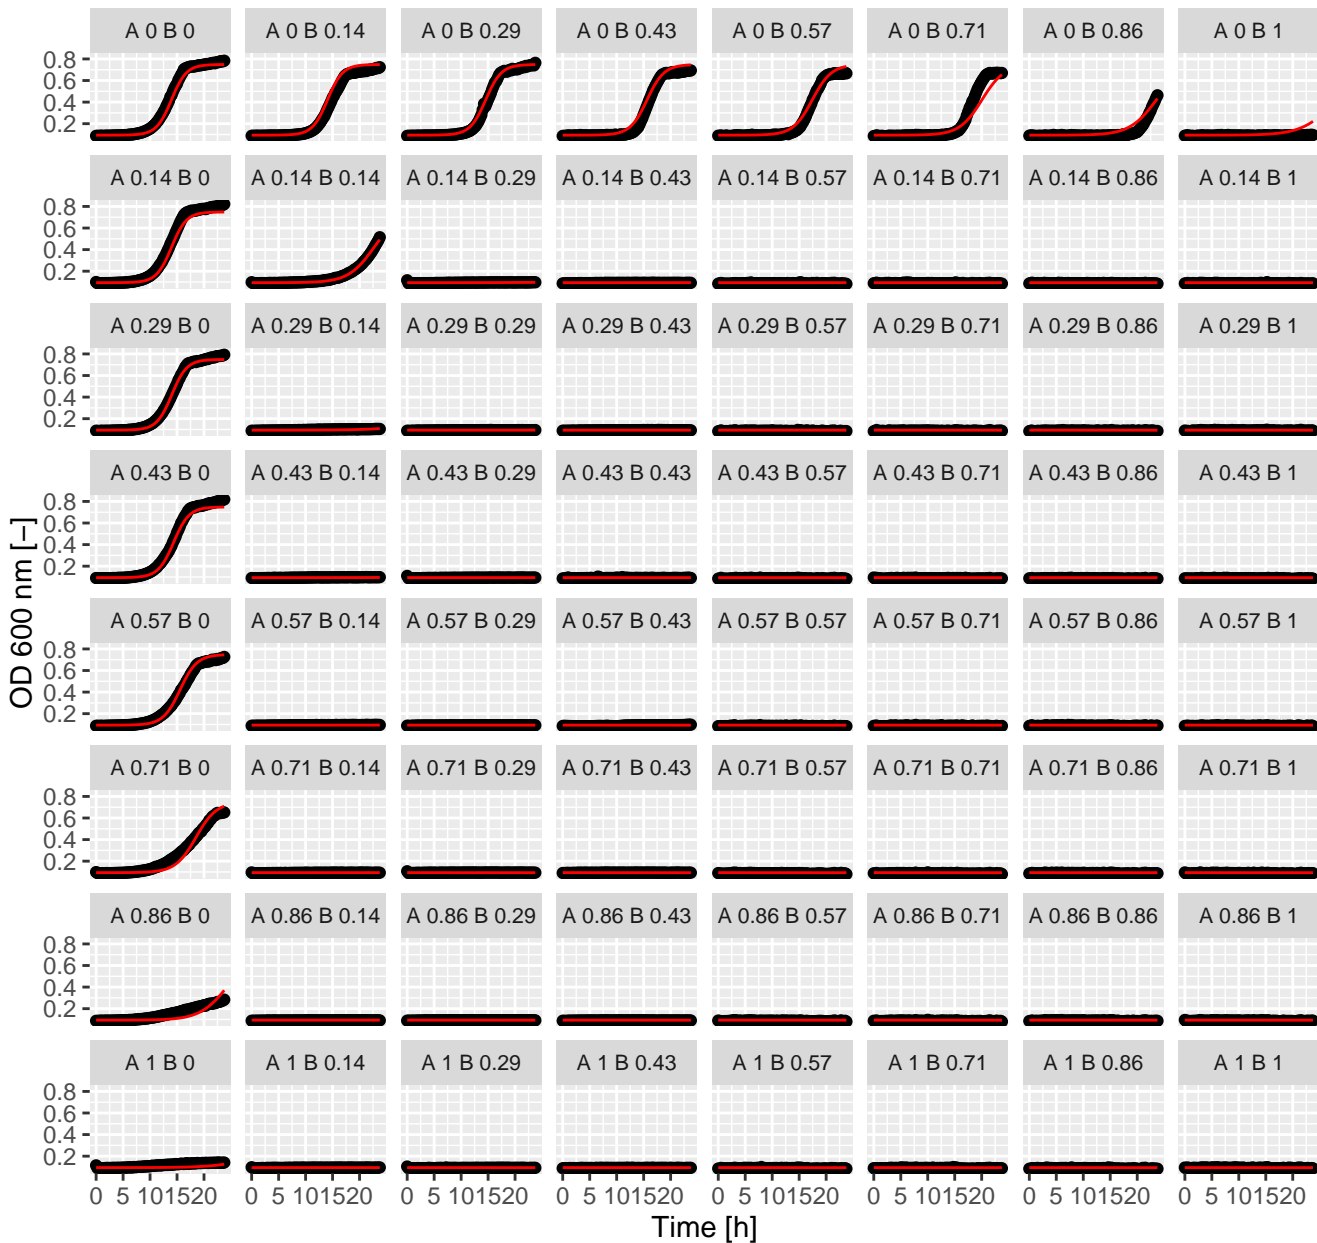

Cal.Fen (= Ax.Bx) exp. additivity (LA)  
Int\_AB = 0 and Int\_BA = 0 at EC50

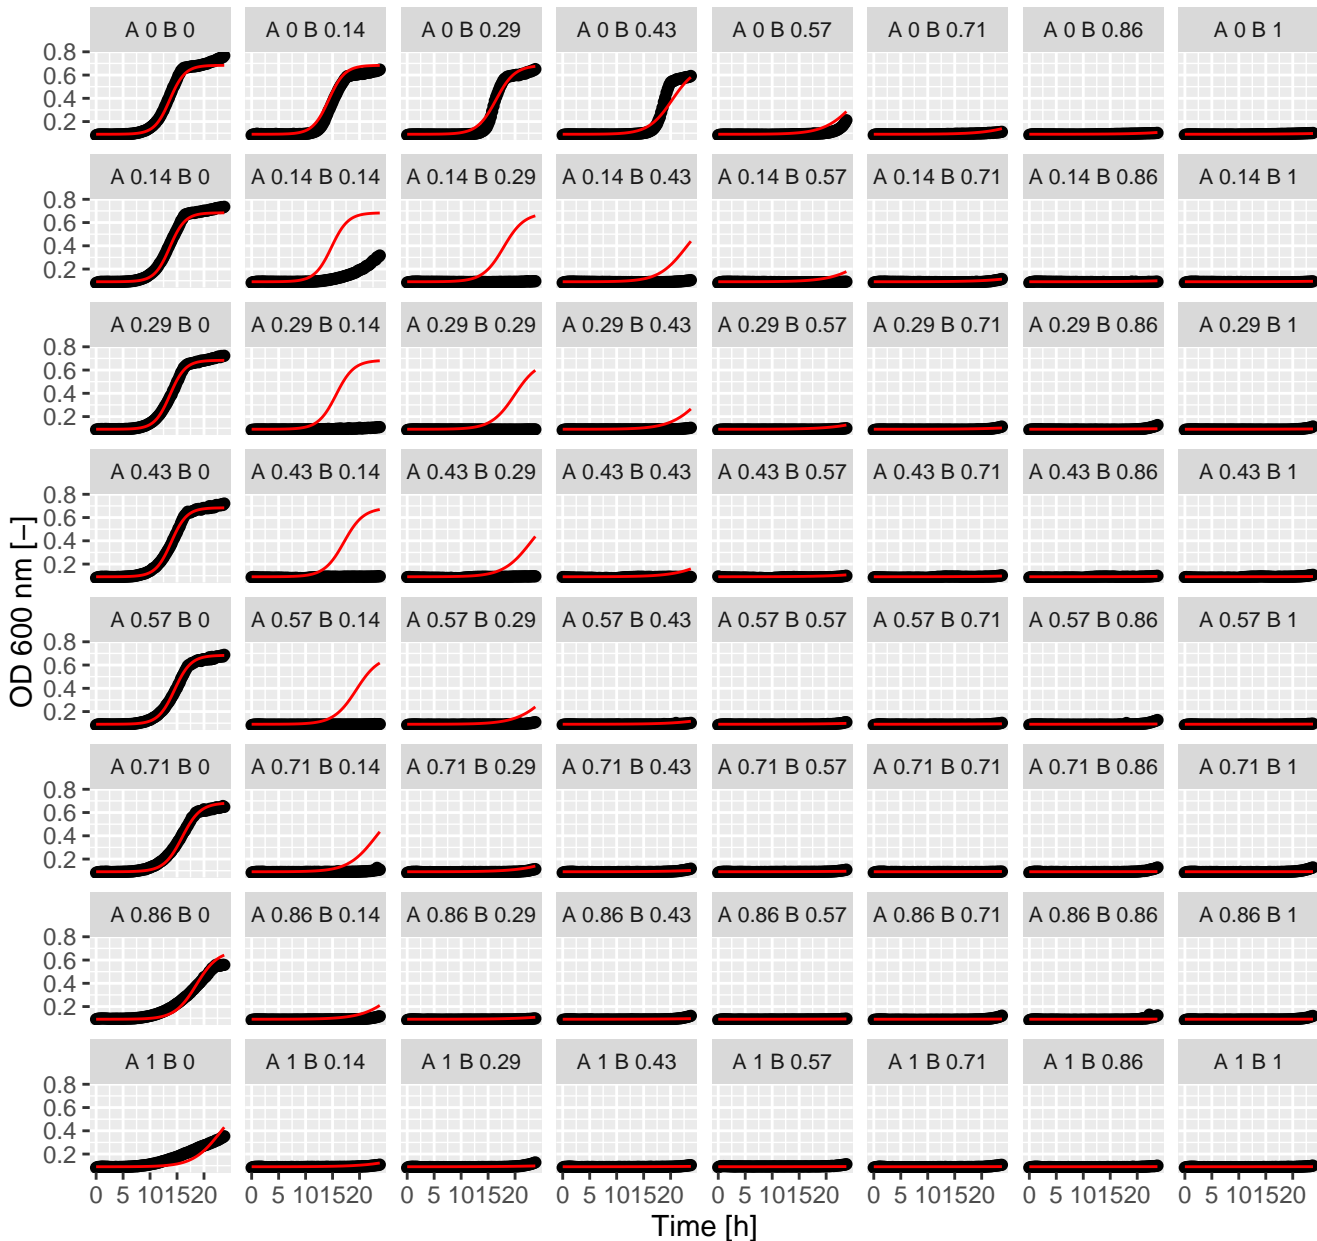

Cal.Fen (= Ax.Bx) full GPDI  
Int\_AB = -0.8 and Int\_BA = -0.74 at EC50

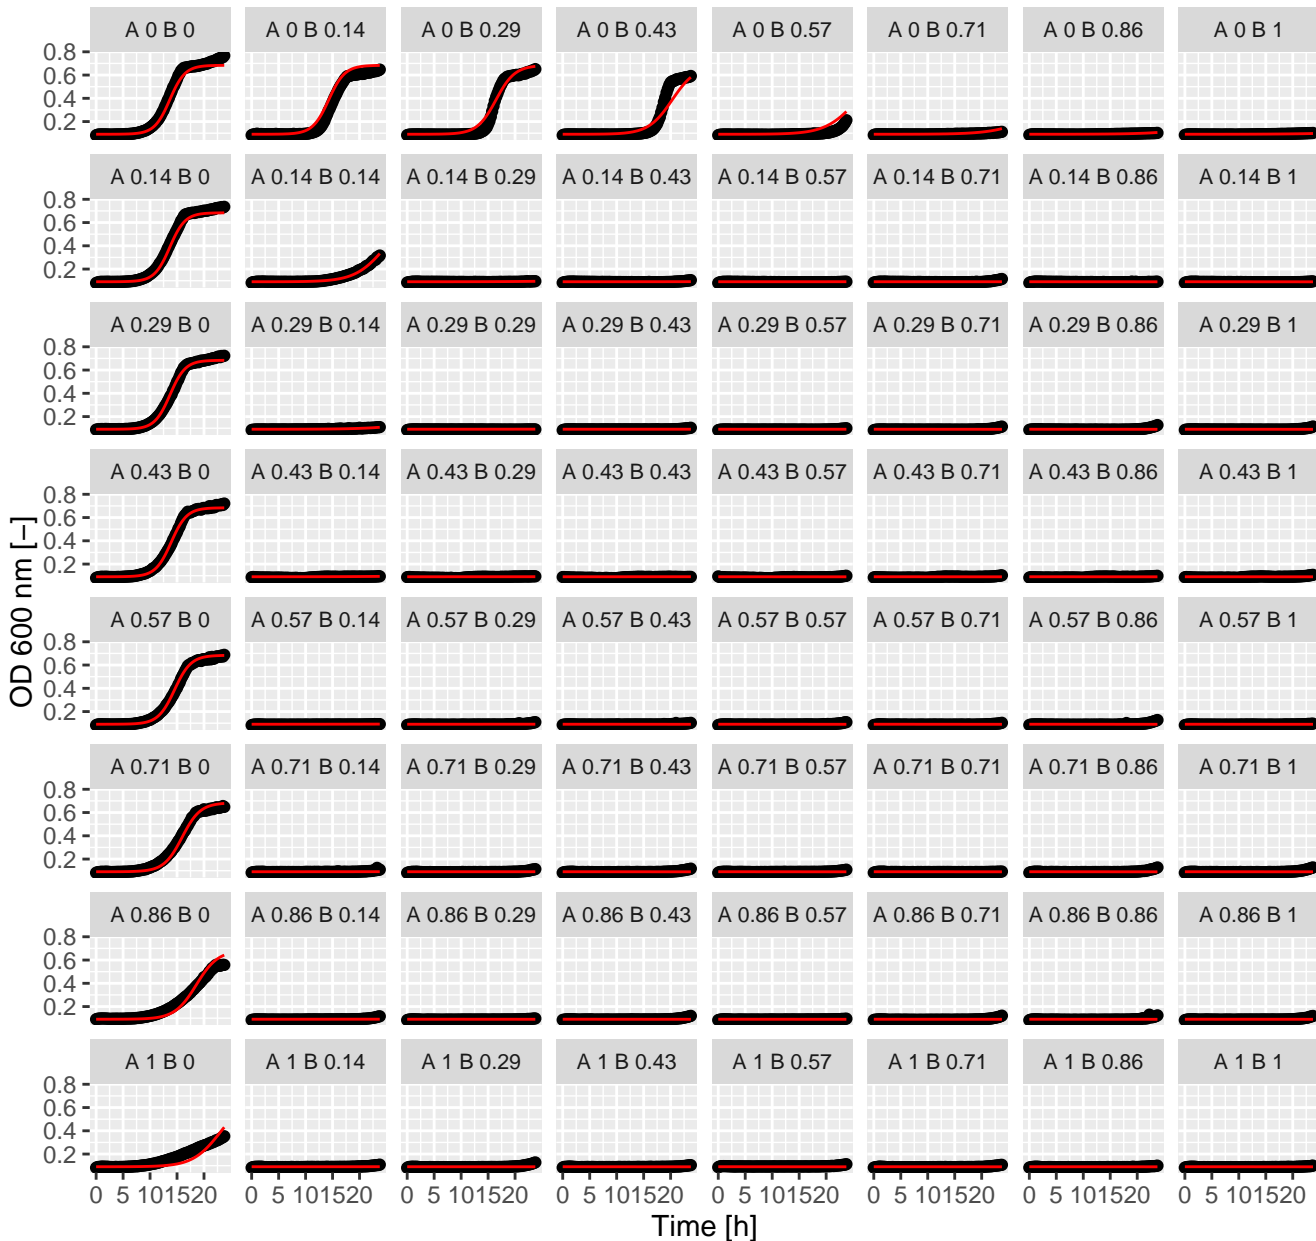

Cal.Hal (= Ax.Bx) exp. additivity (LA)  
Int\_AB = 0 and Int\_BA = 0 at EC50

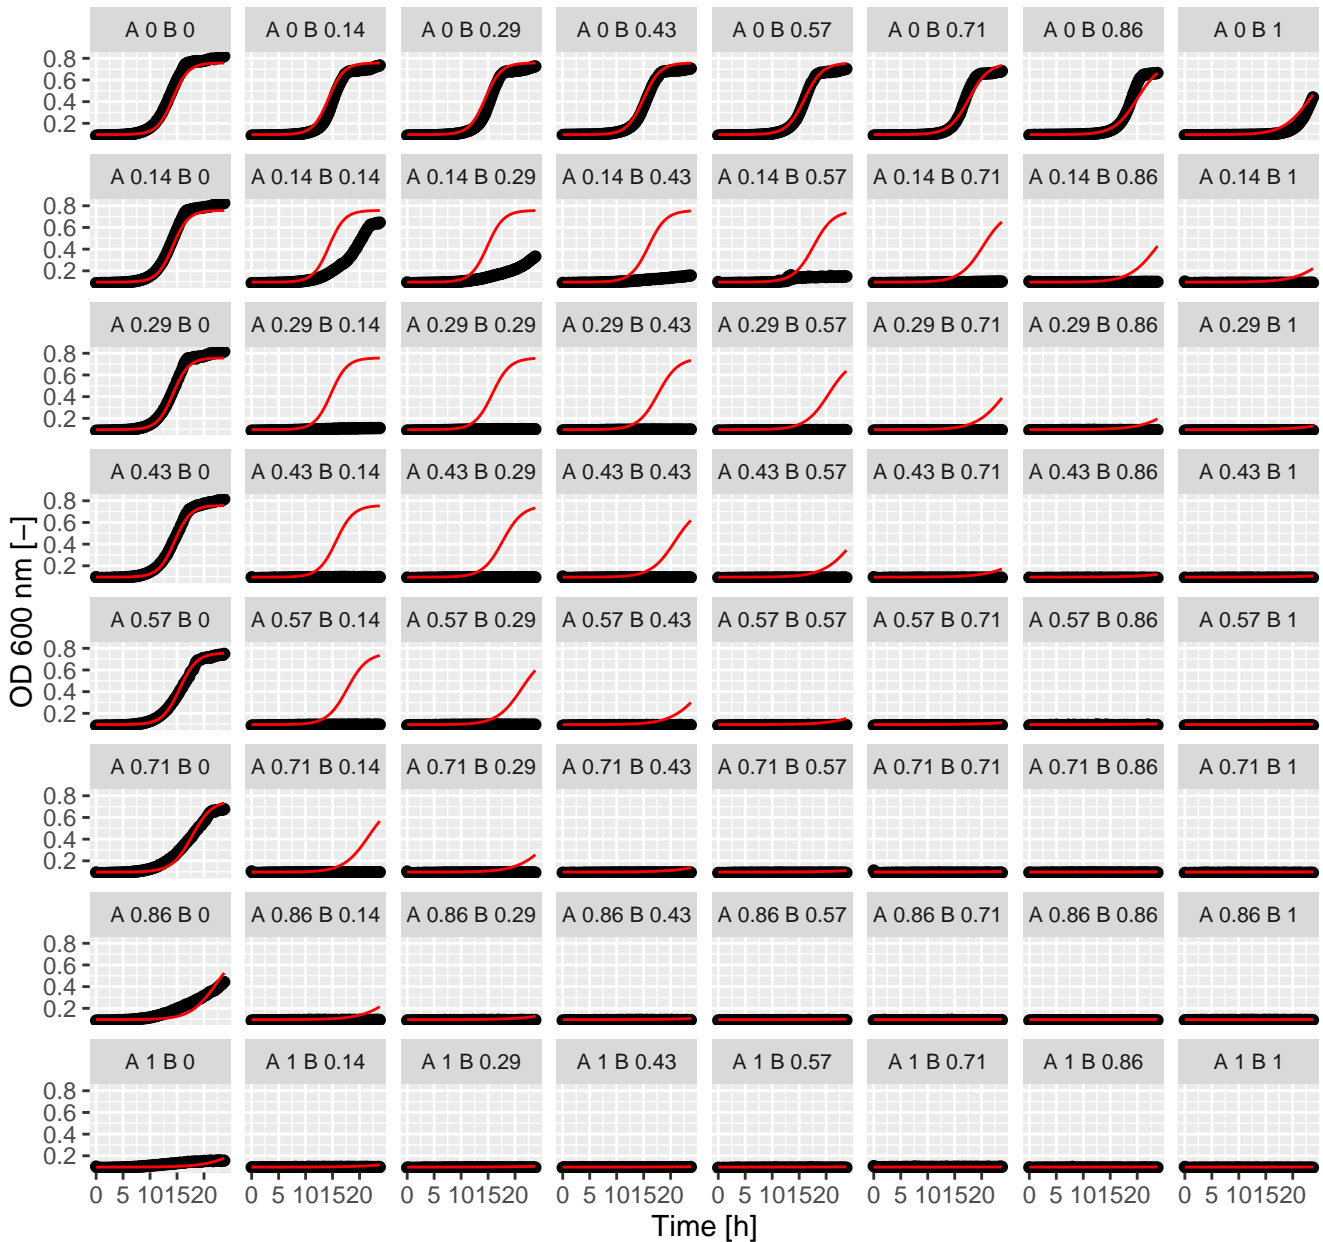

Cal.Hal (= Ax.Bx) full GPDI  
Int\_AB = -0.84 and Int\_BA = 1.37 at EC50

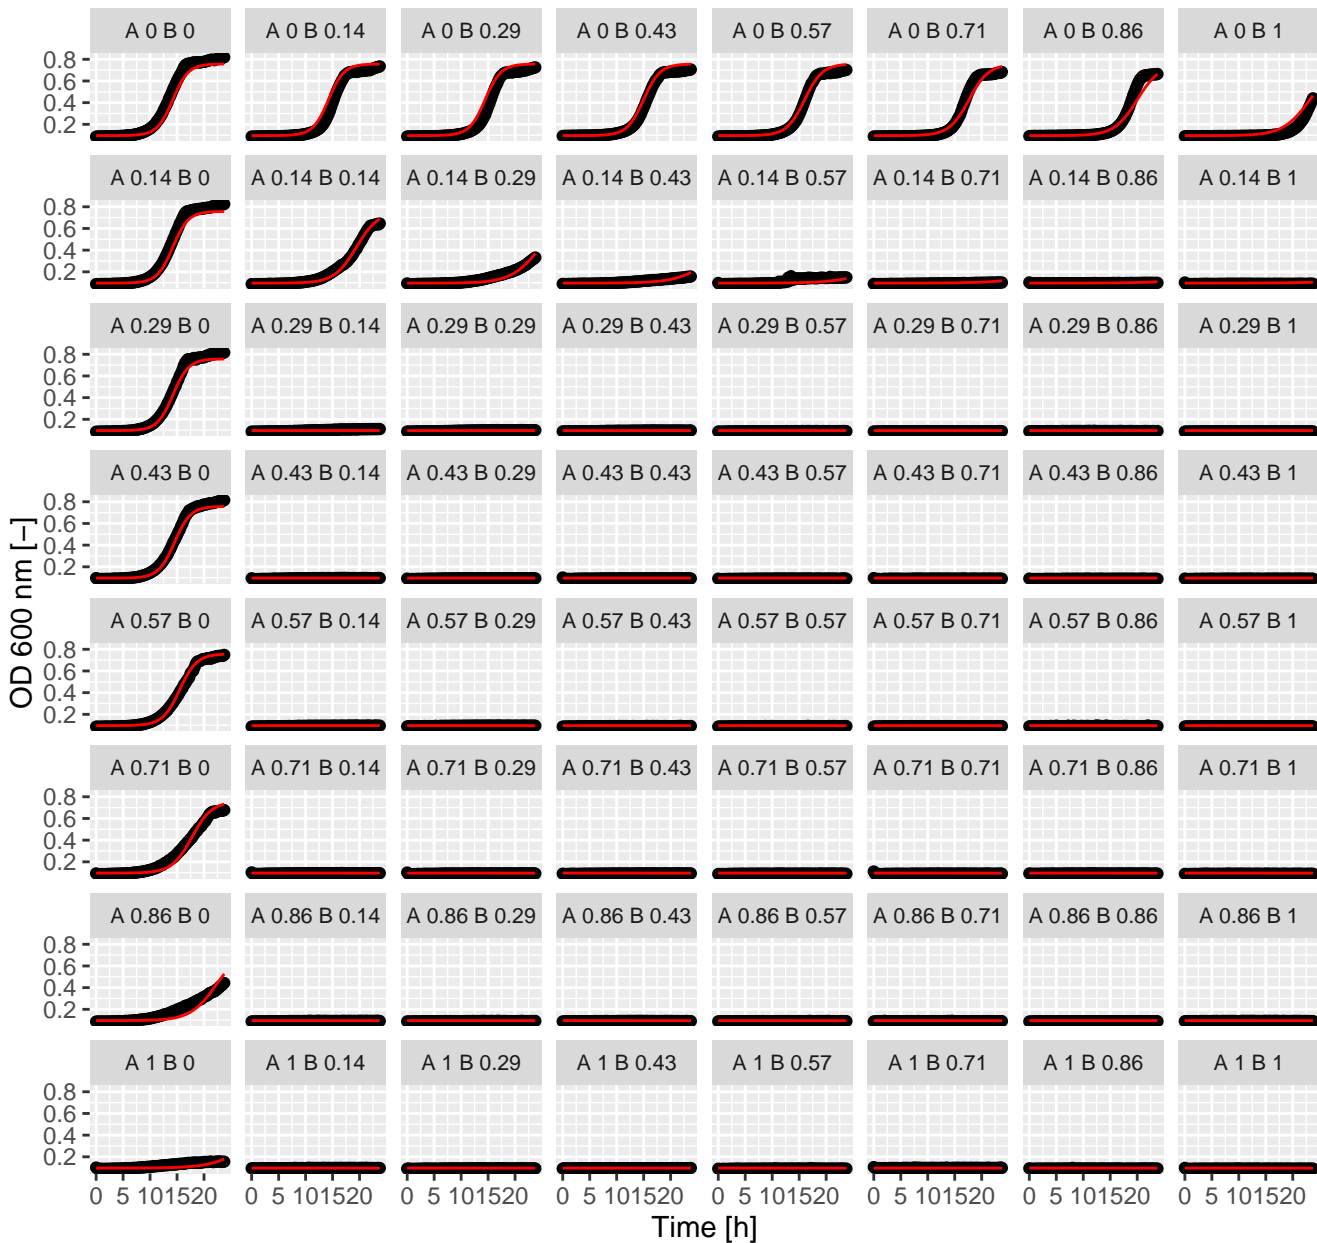

Cal.Lat (= Ax.Bx) exp. additivity (LA)  
Int\_AB = 0 and Int\_BA = 0 at EC50

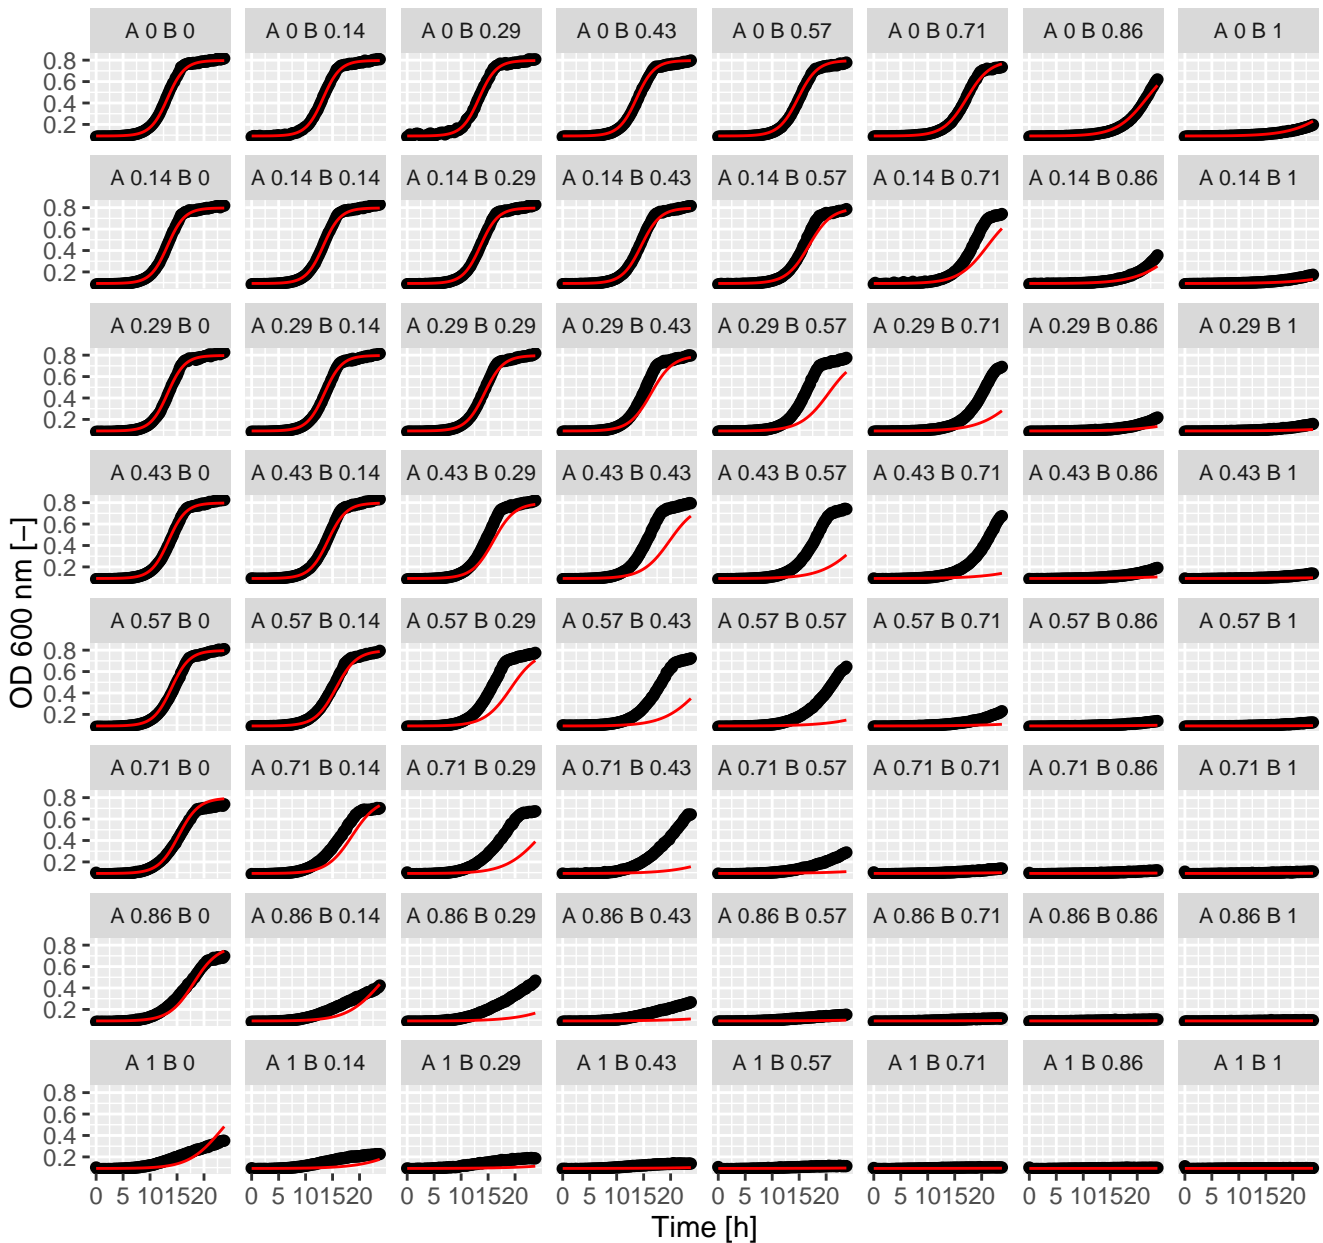

Cal.Lat (= Ax.Bx) full GPDI  
Int\_AB = 0.29 and Int\_BA = 0.62 at EC50

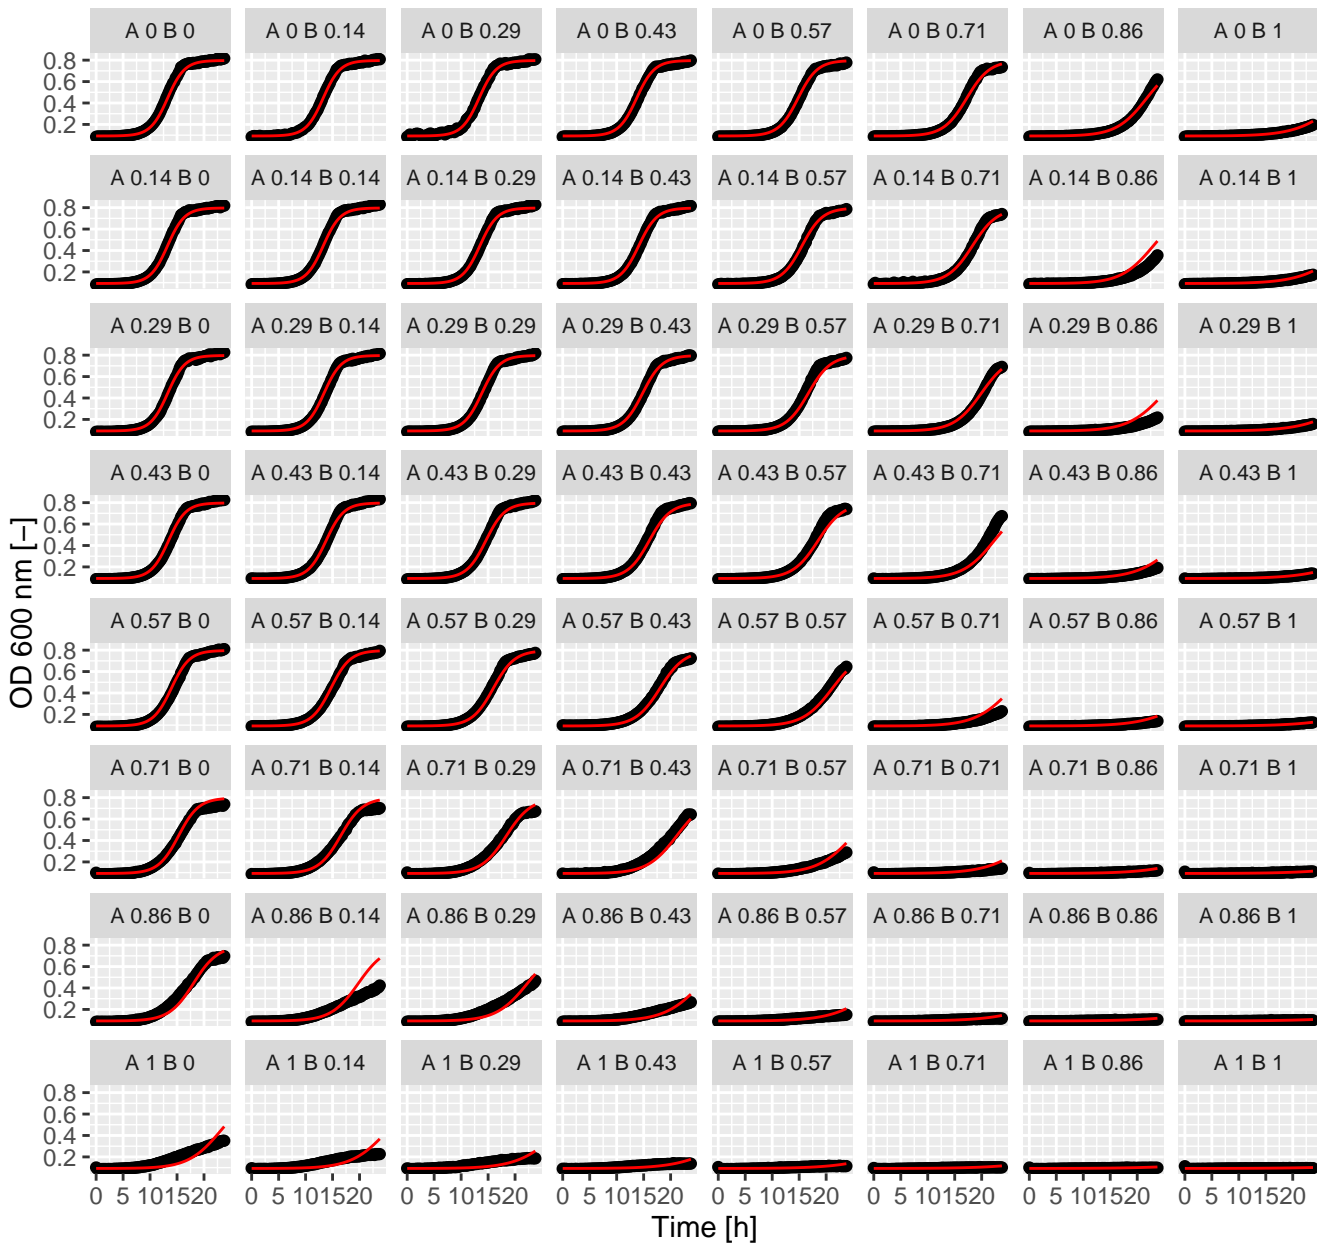



Cal.Pen (= Ax.Bx) exp. additivity (LA)  
Int\_AB = 0 and Int\_BA = 0 at EC50

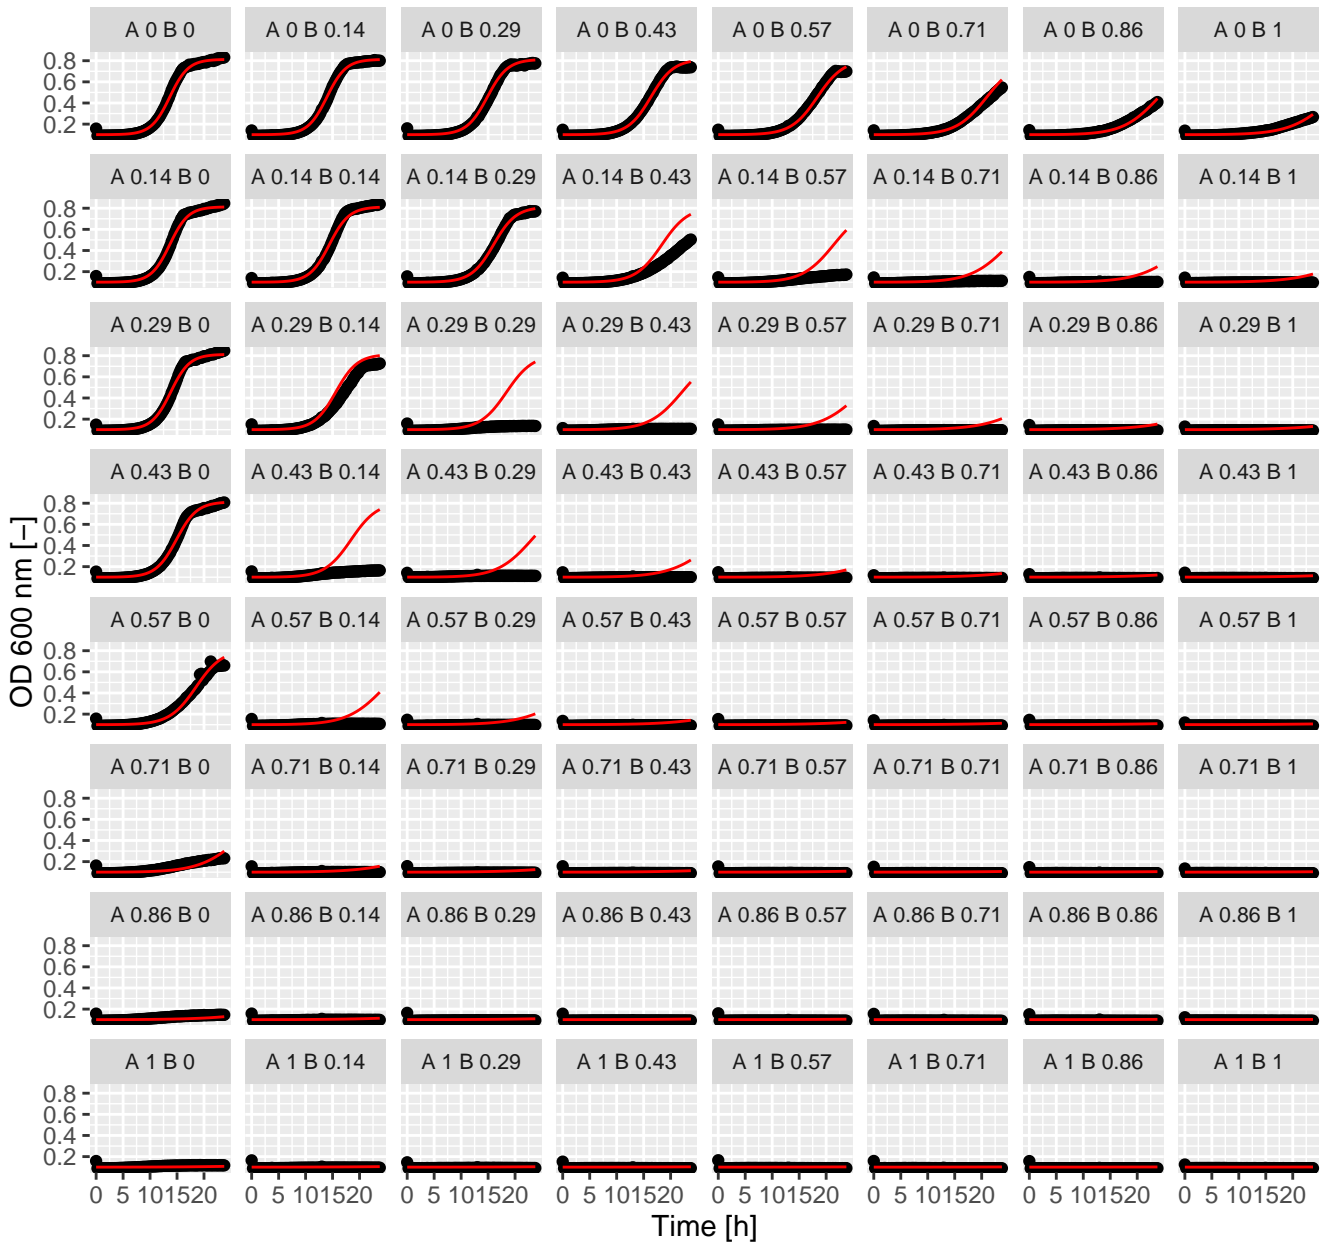

Cal.Pen (= Ax.Bx) full GPDI  
Int\_AB = -0.68 and Int\_BA = 0.06 at EC50

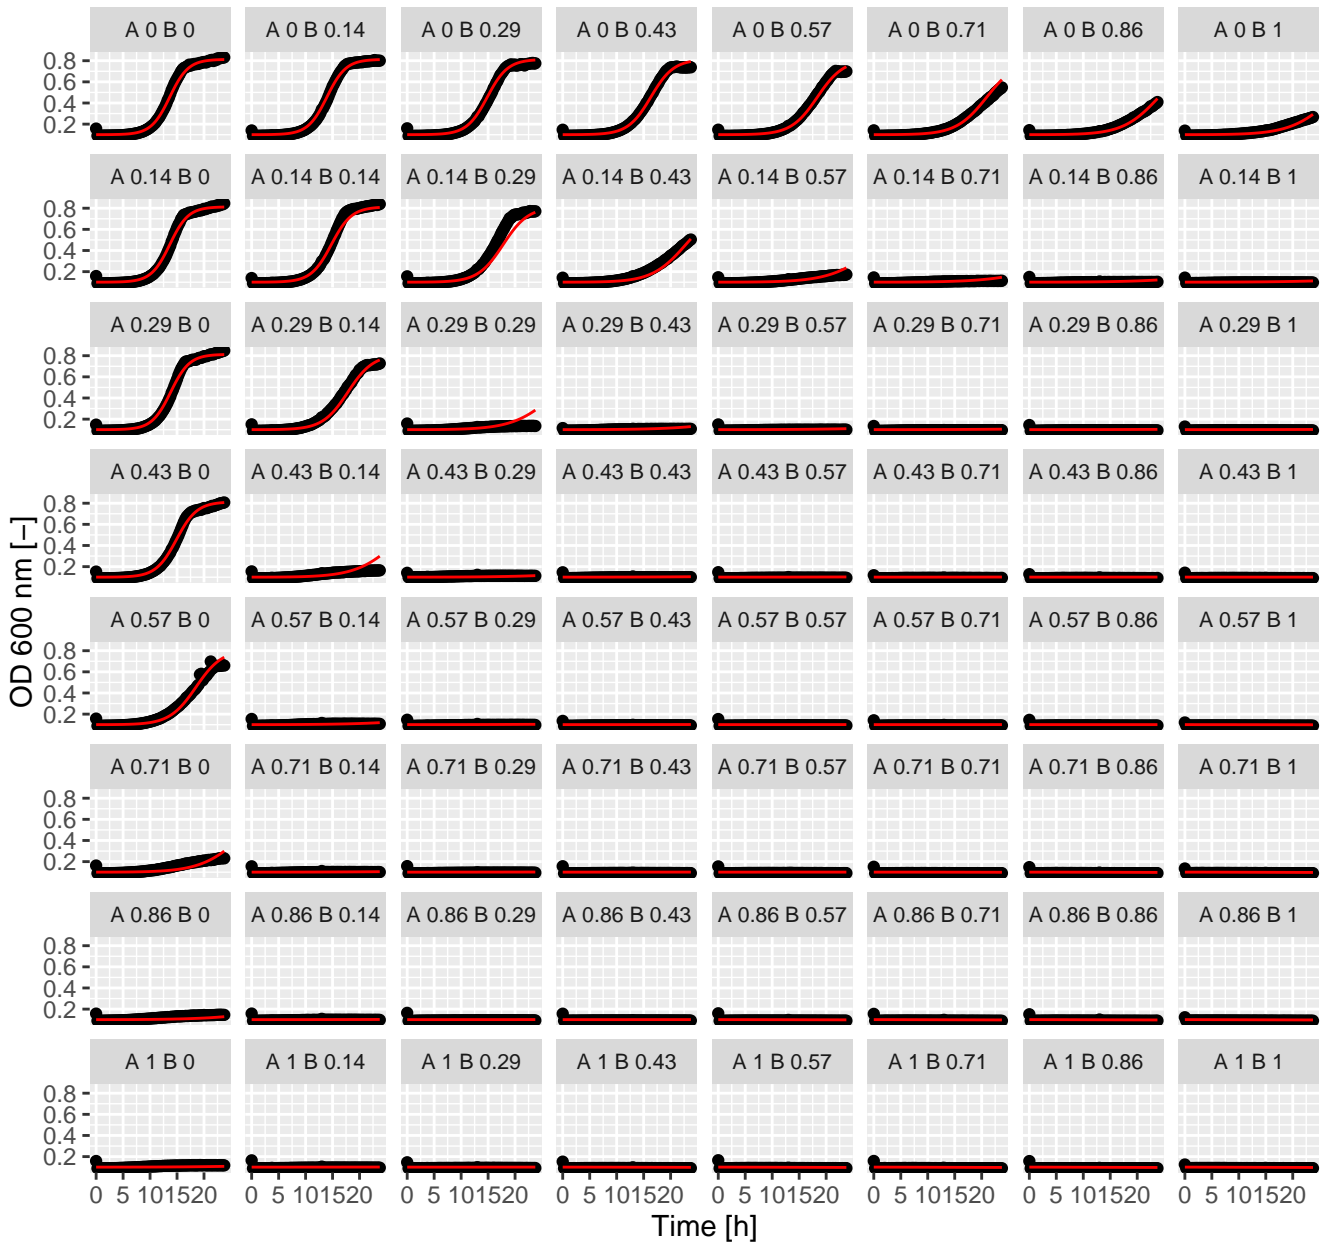

Cal.Rap (= Ax.Bx) exp. additivity (LA)  
Int\_AB = 0 and Int\_BA = 0 at EC50

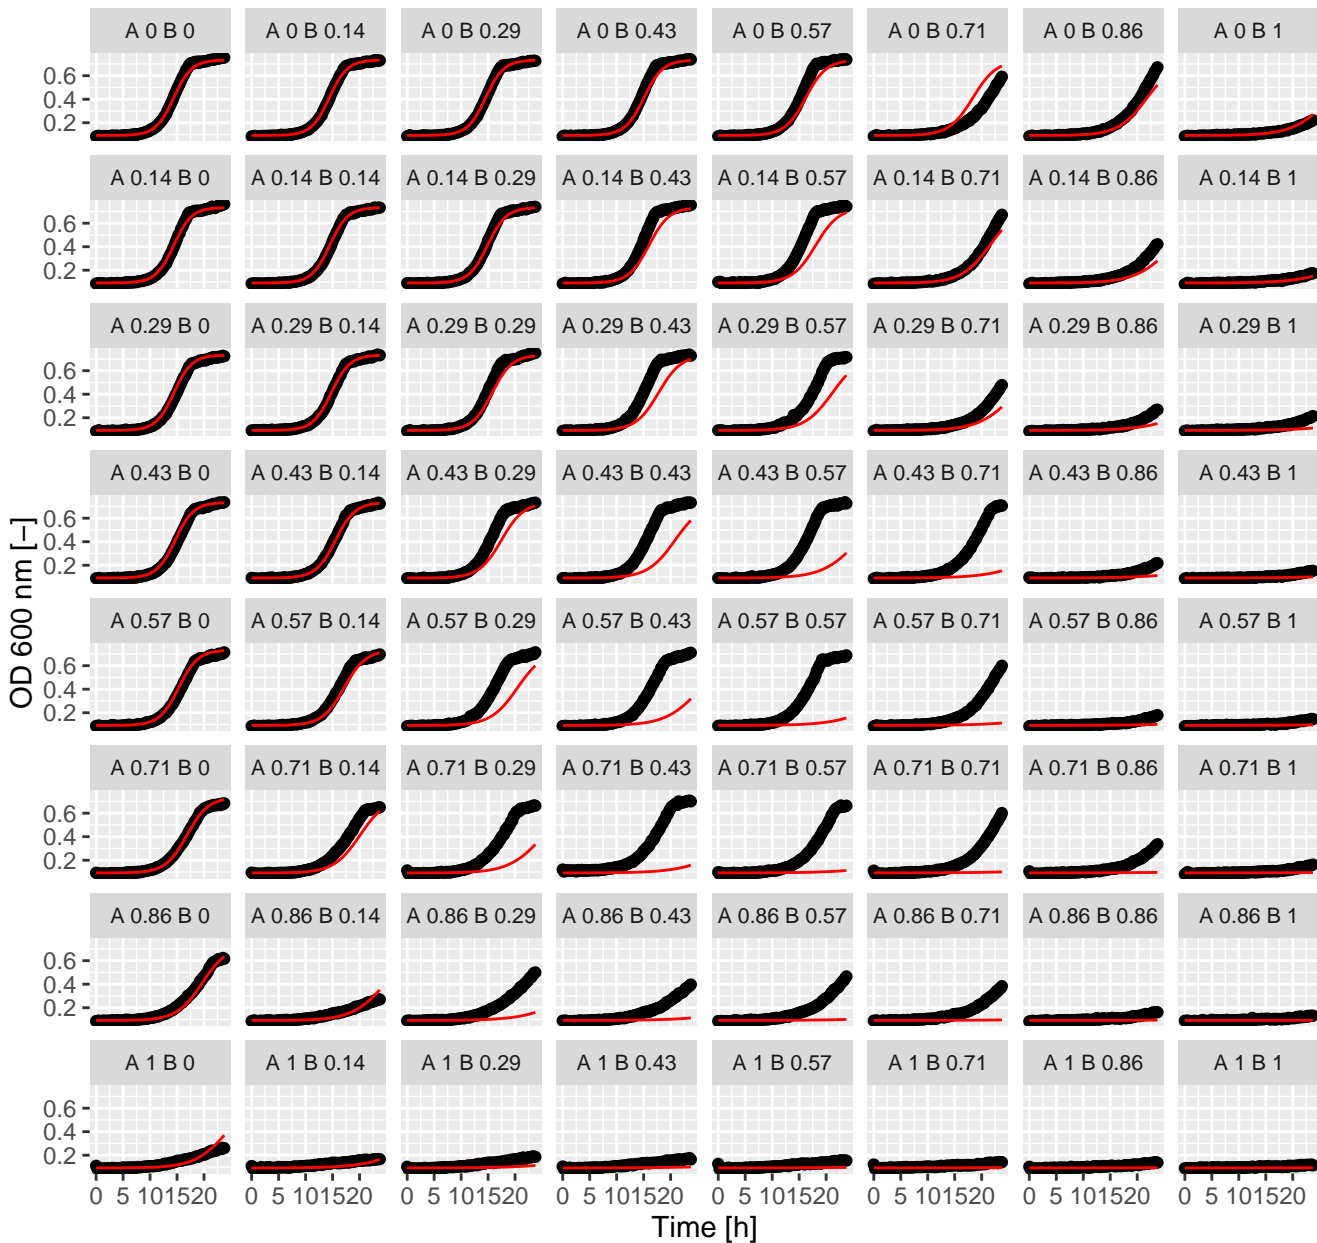

Cal.Rap (= Ax.Bx) full GPDI  
 Int\_AB = 0.81 and Int\_BA = 0.69 at EC50

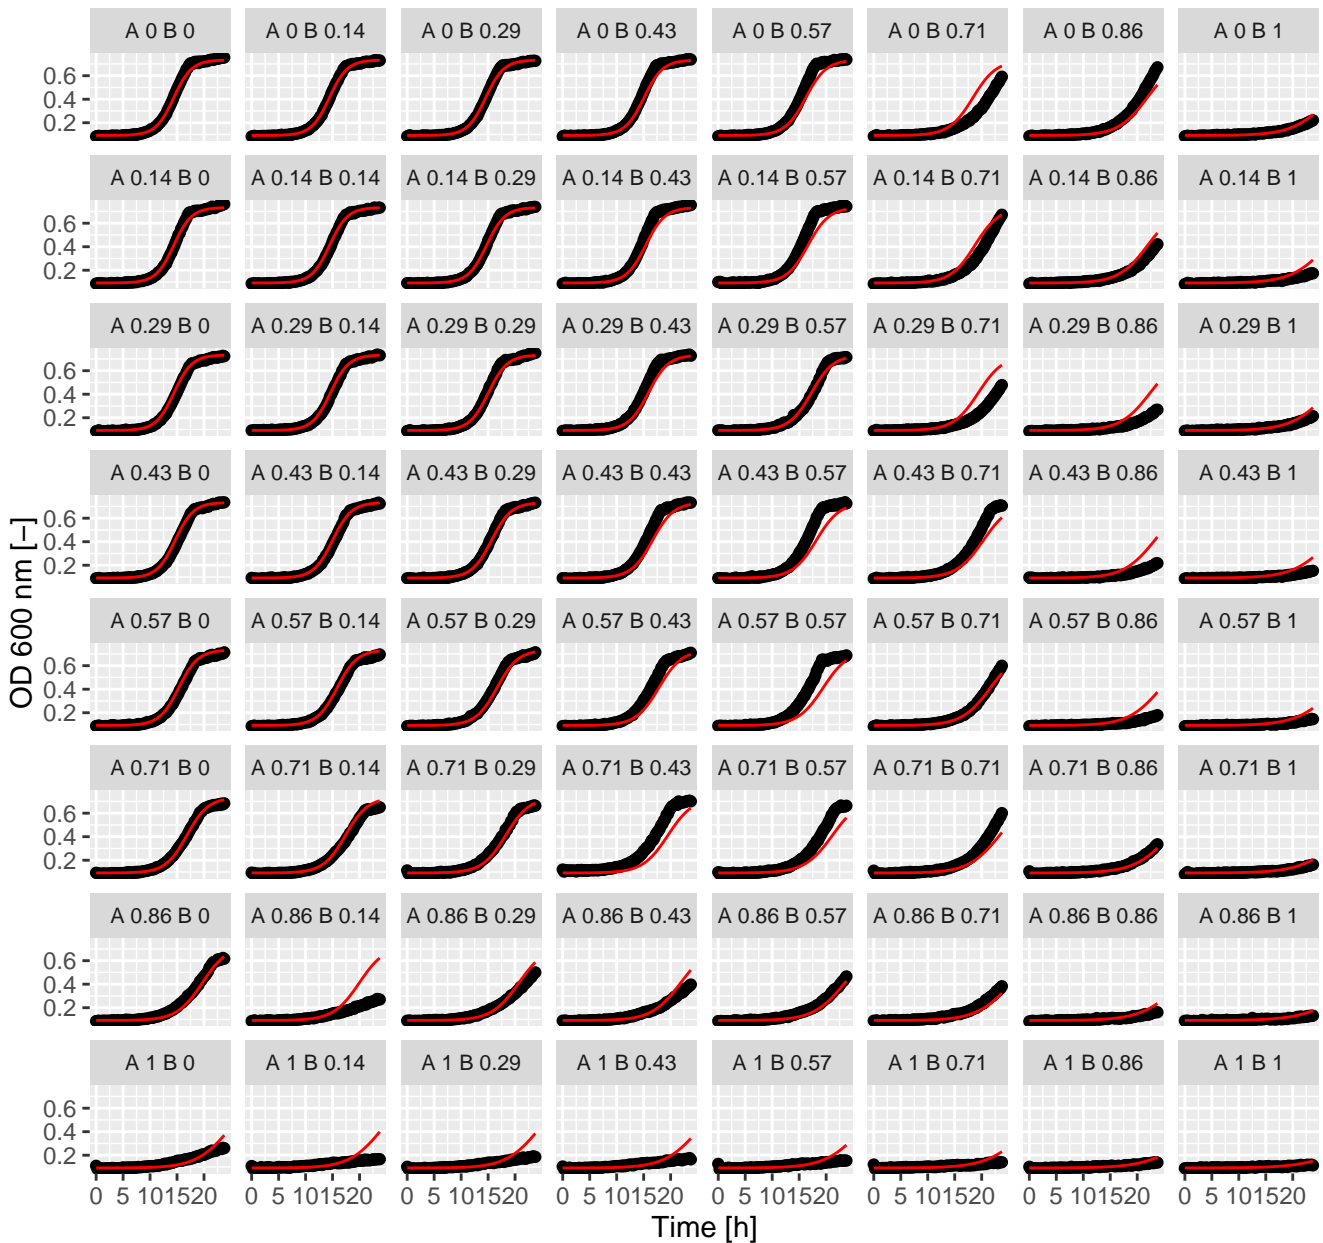

Cal.Sta (= Ax.Bx) exp. additivity (LA)  
Int\_AB = 0 and Int\_BA = 0 at EC50

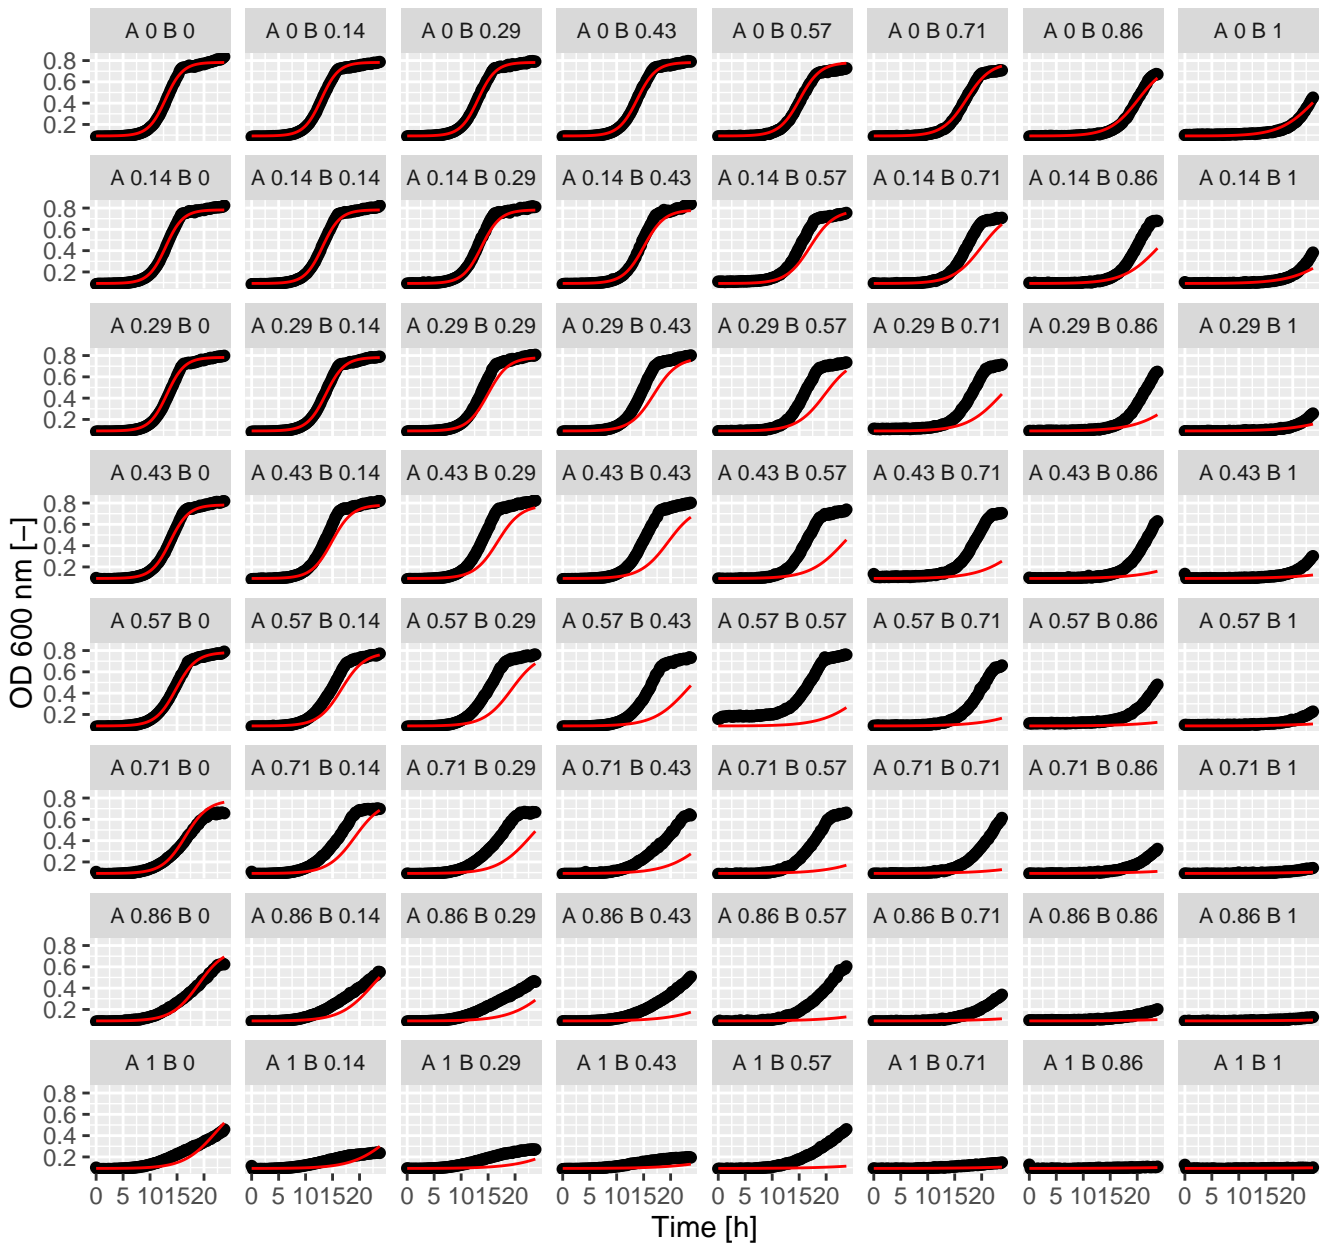

Cal.Sta (= Ax.Bx) full GPDI  
Int\_AB = 0.76 and Int\_BA = 0.43 at EC50

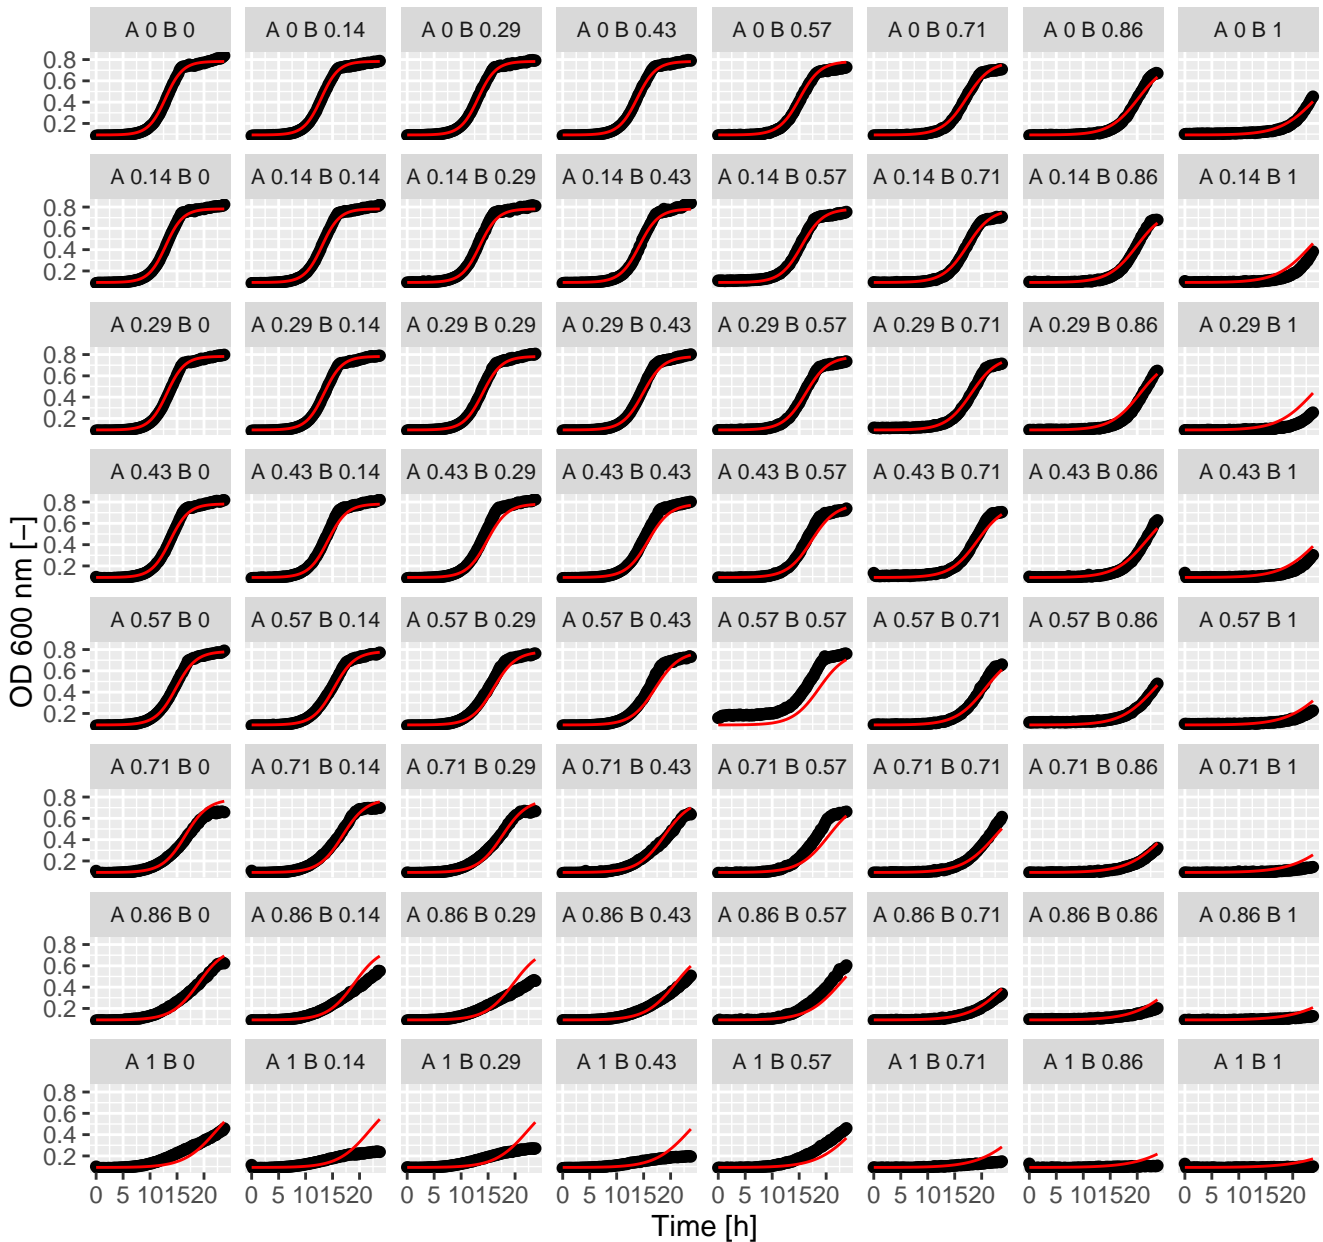

Cal.Tac (= Ax.Bx) exp. additivity (LA)  
Int\_AB = 0 and Int\_BA = 0 at EC50

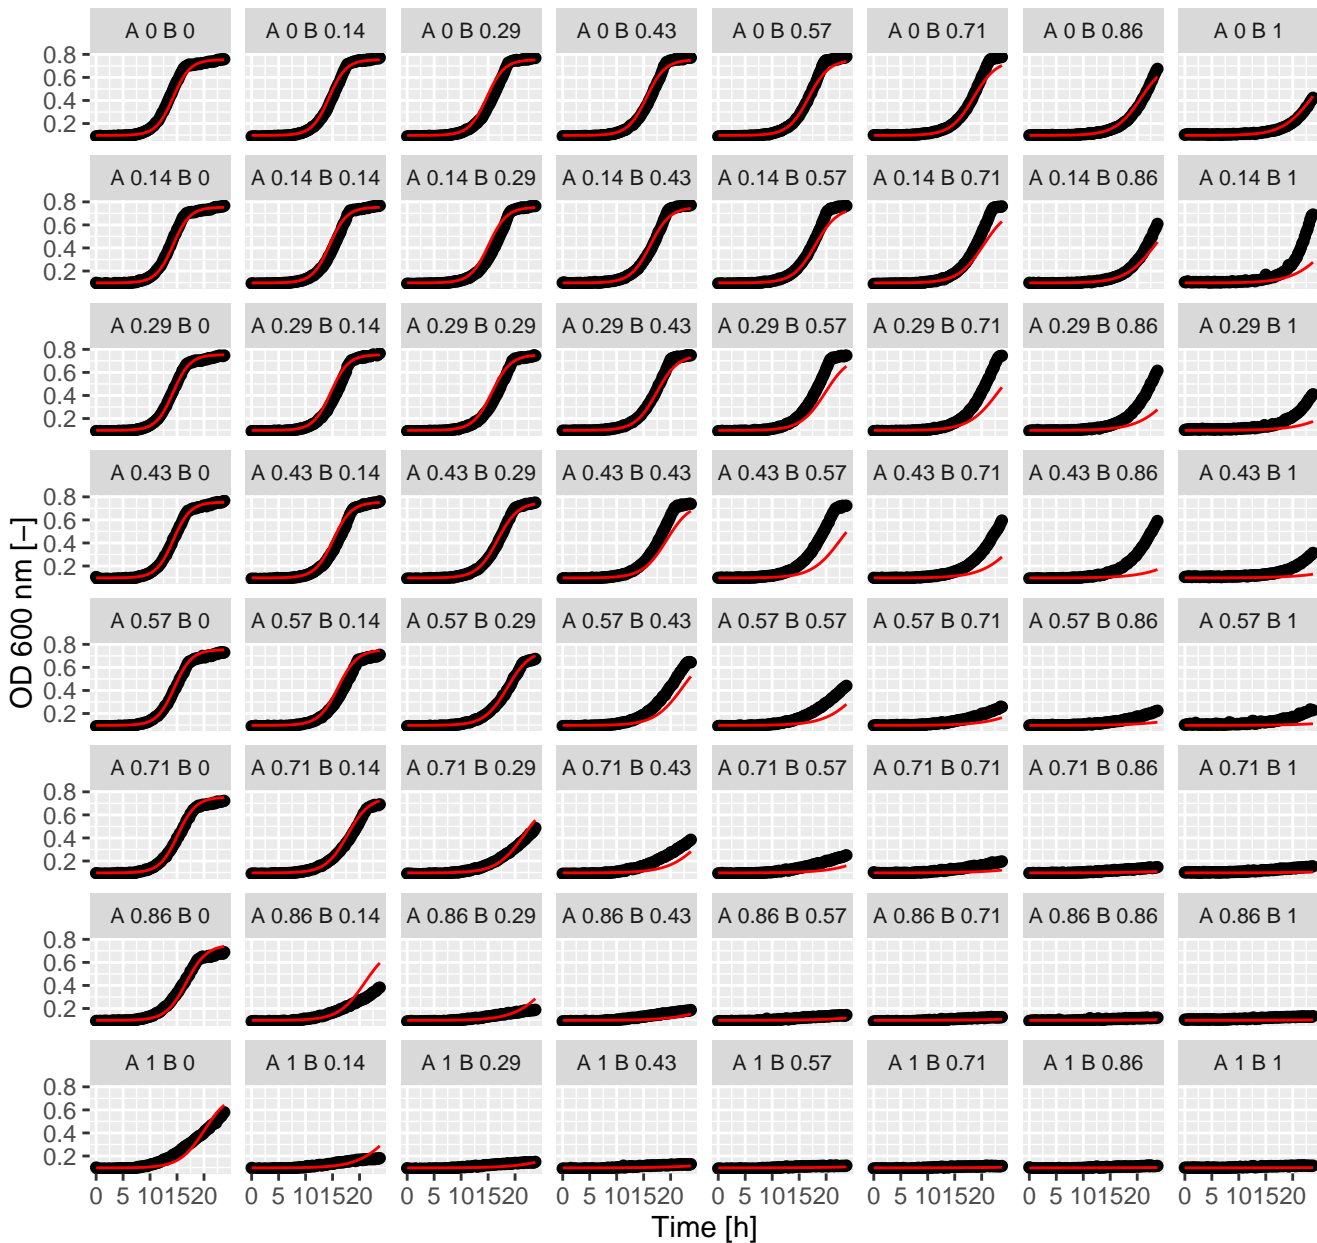

Cal.Tac (= Ax.Bx) full GPDI  
 Int\_AB = 0 and Int\_BA = 0.64 at EC50

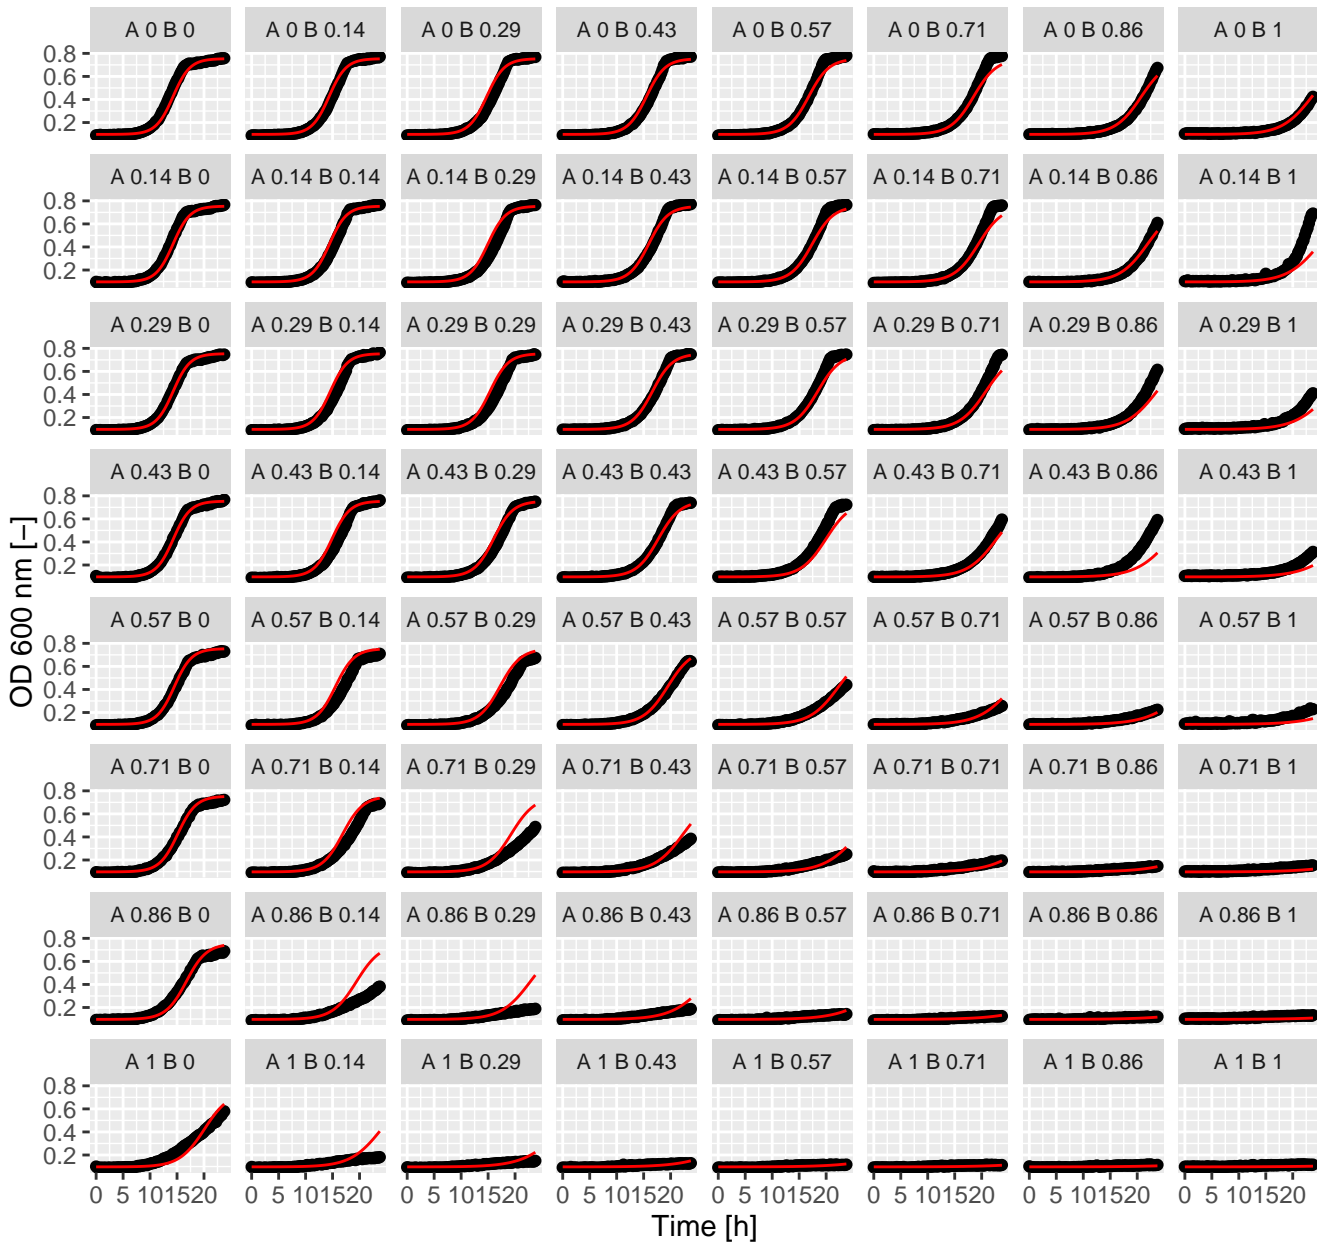



Cal.Ter (= Ax.Bx) exp. additivity (LA)  
 Int\_AB = 0 and Int\_BA = 0 at EC50

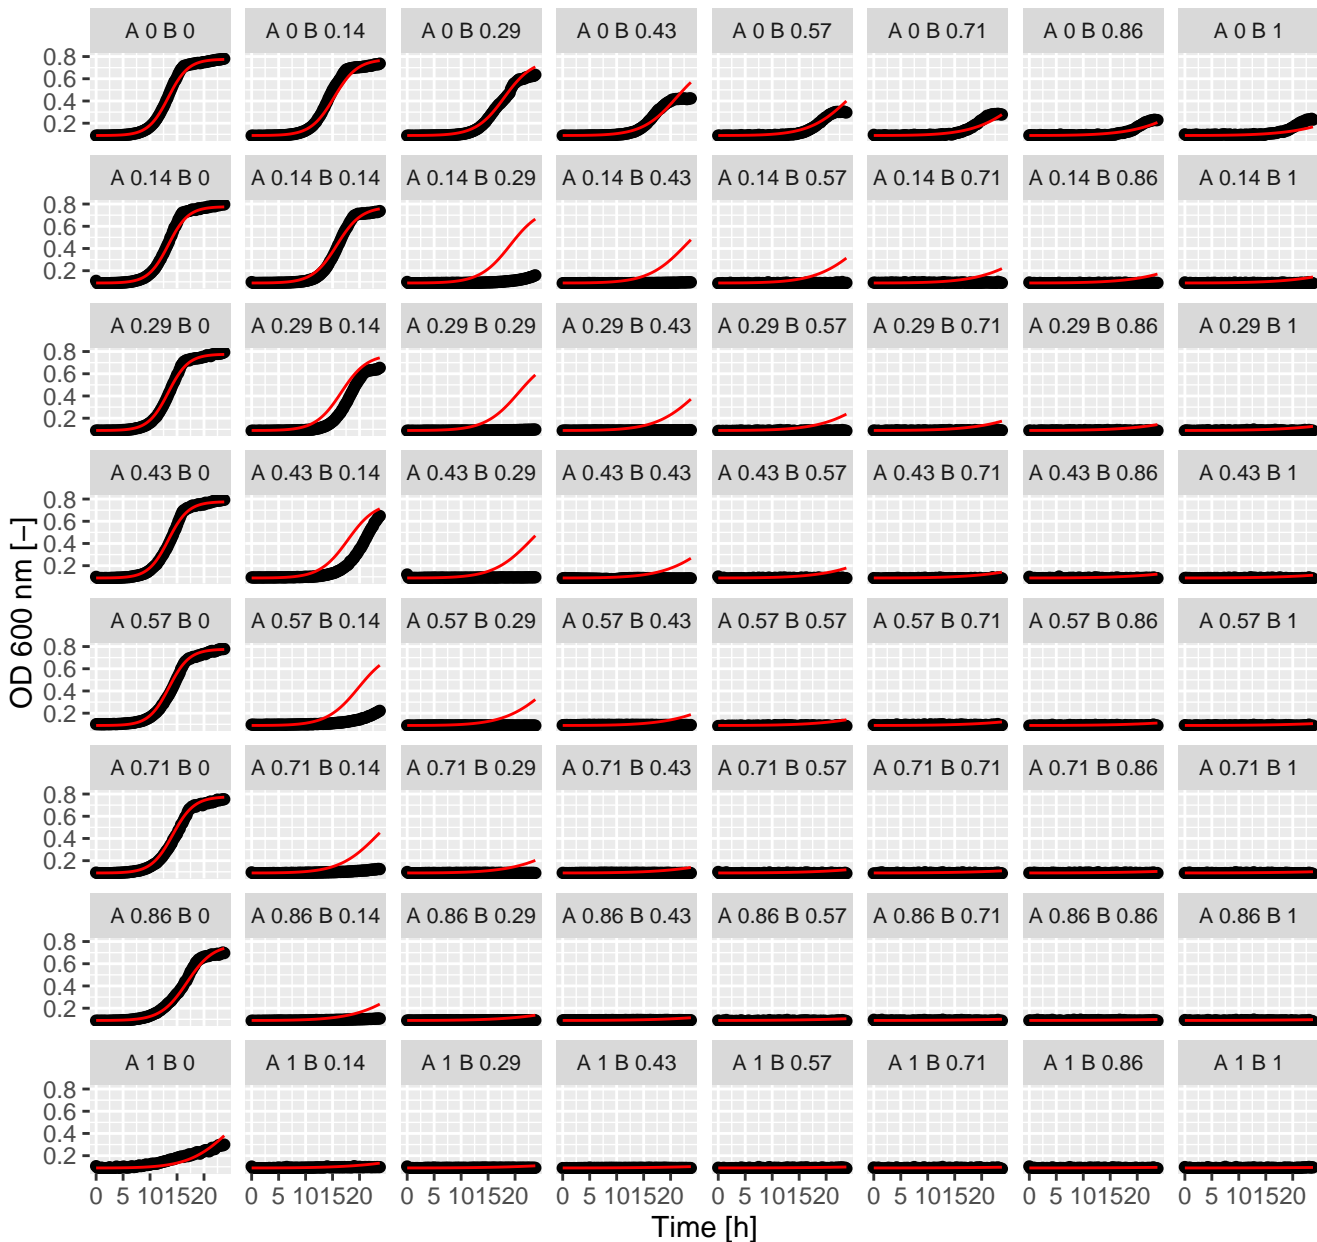

Cal.Ter (= Ax.Bx) full GPDI  
 Int\_AB = -0.55 and Int\_BA = -0.35 at EC50

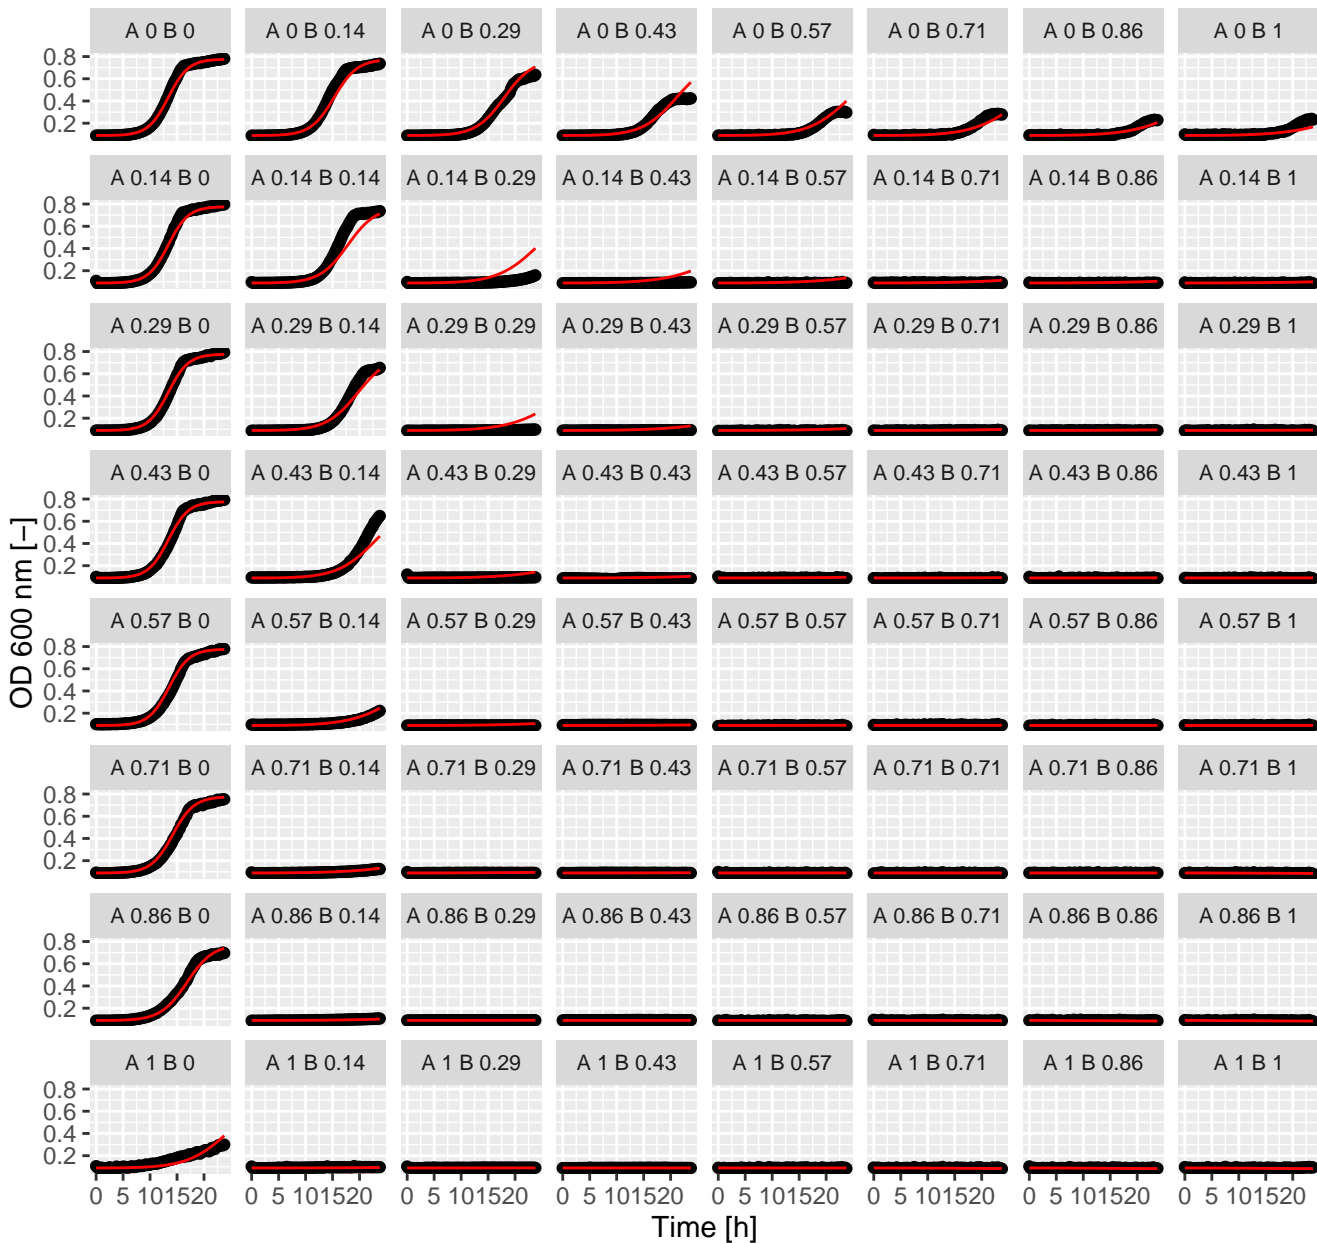

Cal.Tun (= Ax.Bx) exp. additivity (LA)  
Int\_AB = 0 and Int\_BA = 0 at EC50

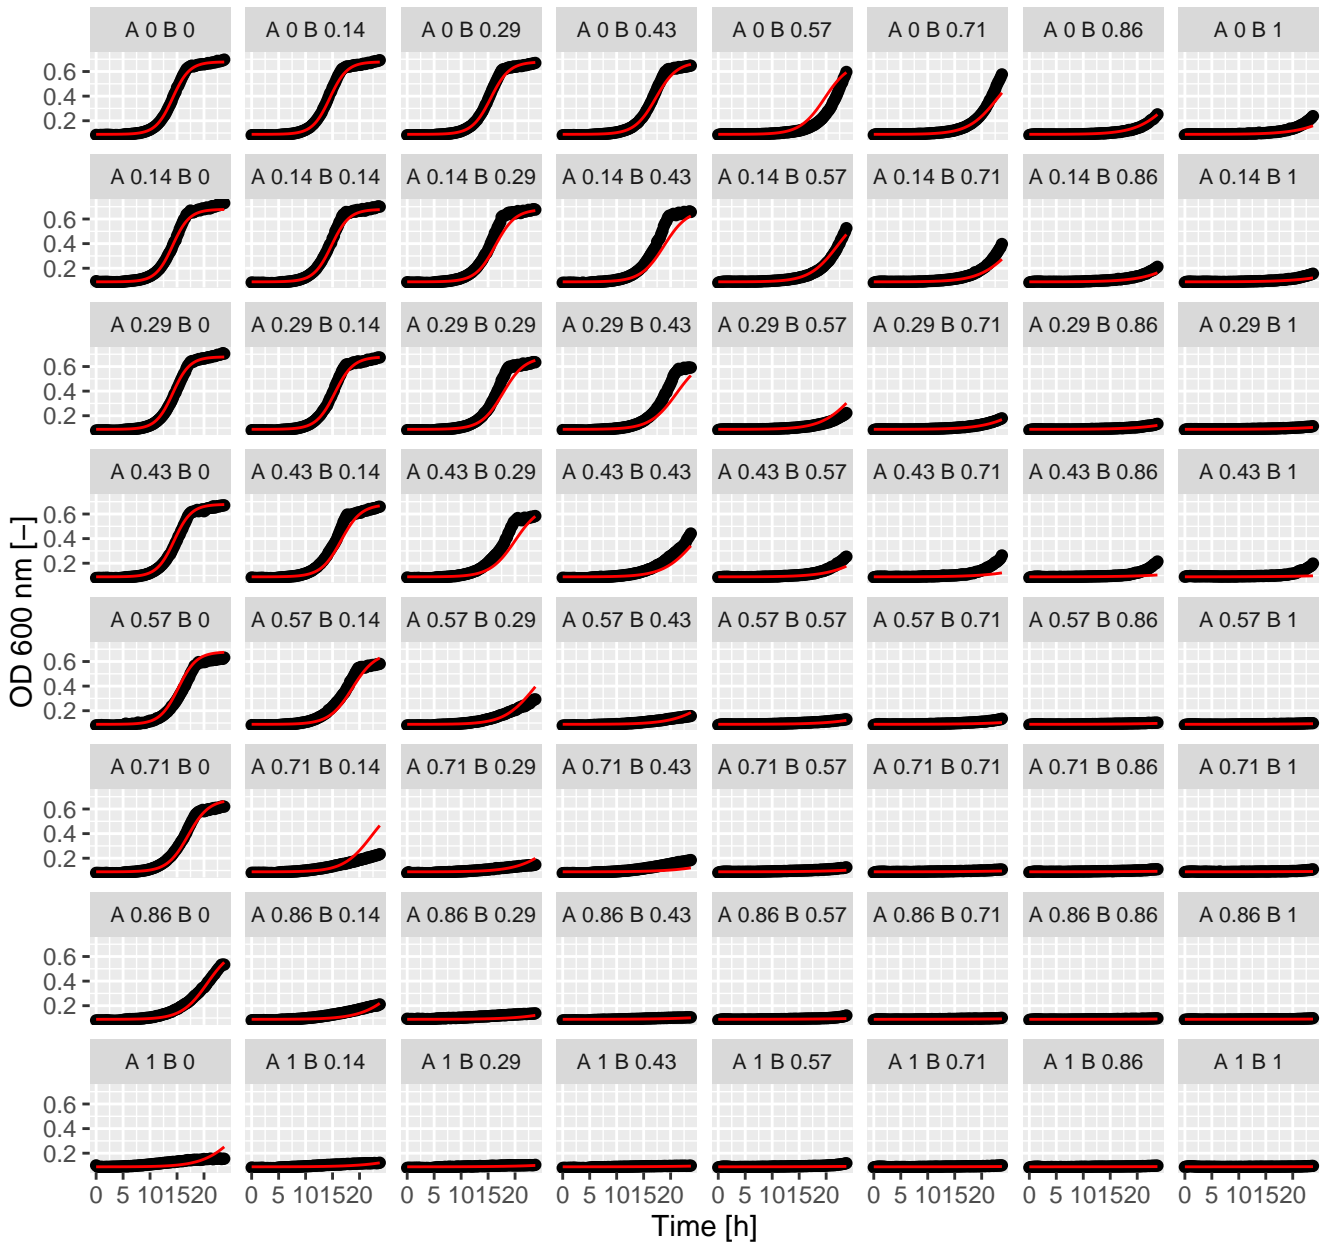

Cal.Tun (= Ax.Bx) full GPDI  
 Int\_AB = -0.48 and Int\_BA = 1.95 at EC50

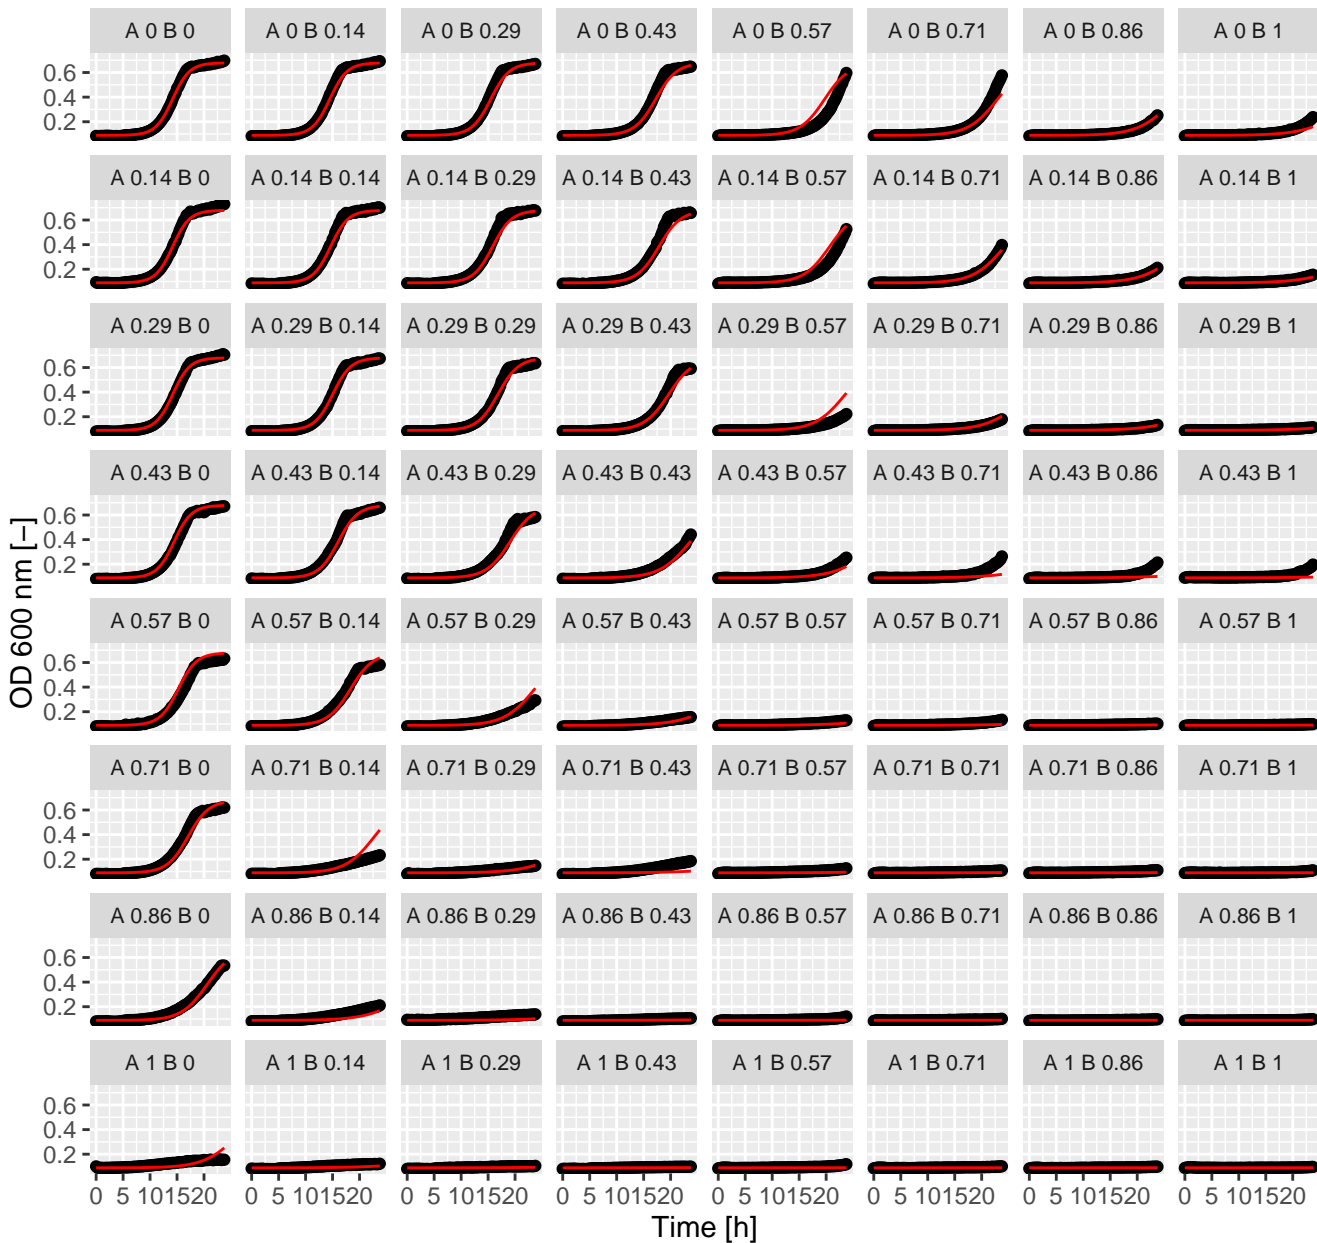

Can.Can (= Ax.Bx) exp. additivity (LA)  
Int\_AB = 0 and Int\_BA = 0 at EC50

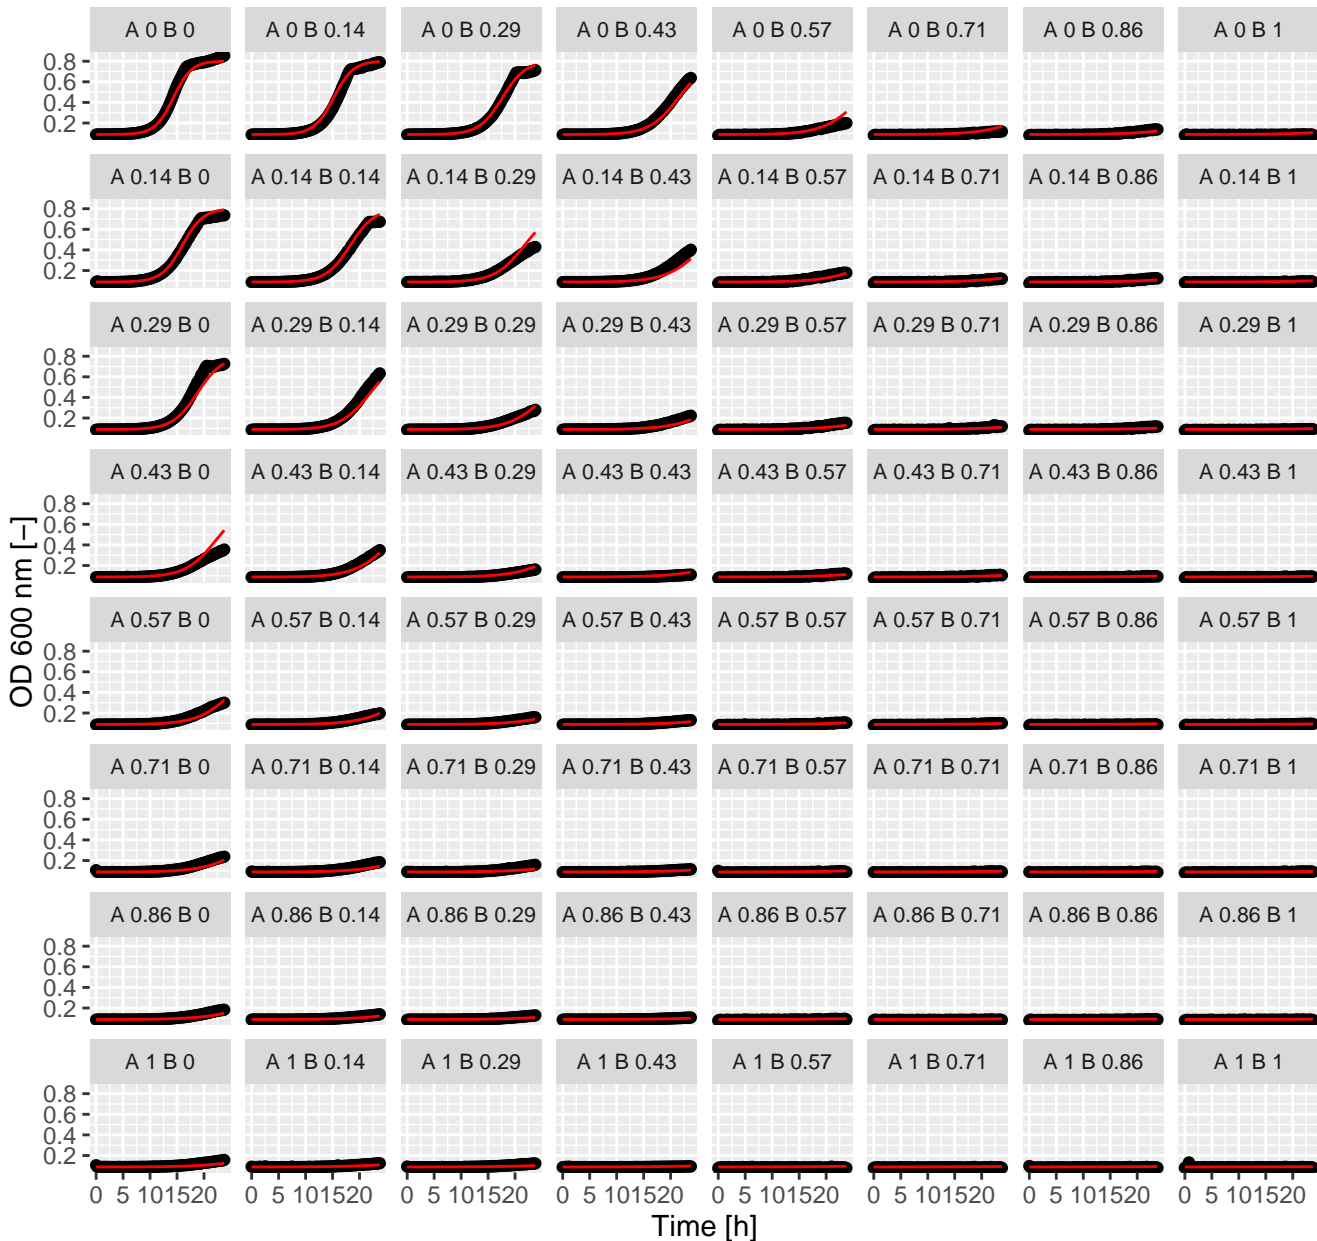

Can.Can (= Ax.Bx) full GPD1  
Int\_AB = 0 and Int\_BA = 0.18 at EC50

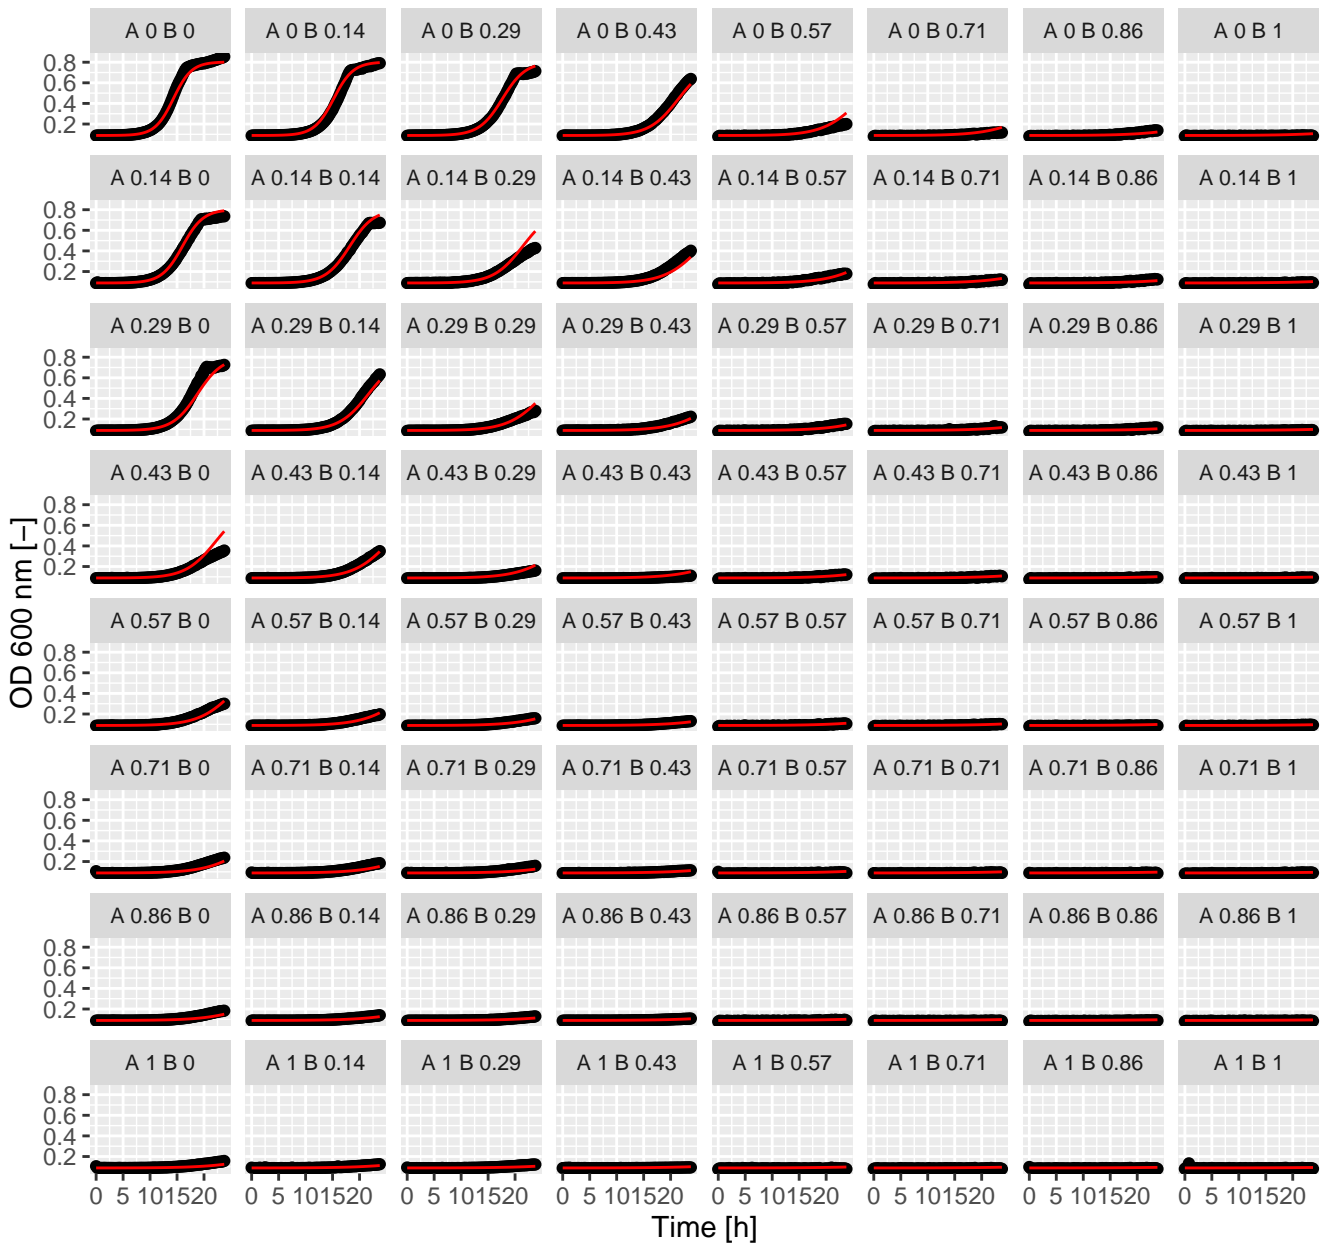

Can.Lat (= Ax.Bx) exp. additivity (LA)  
Int\_AB = 0 and Int\_BA = 0 at EC50

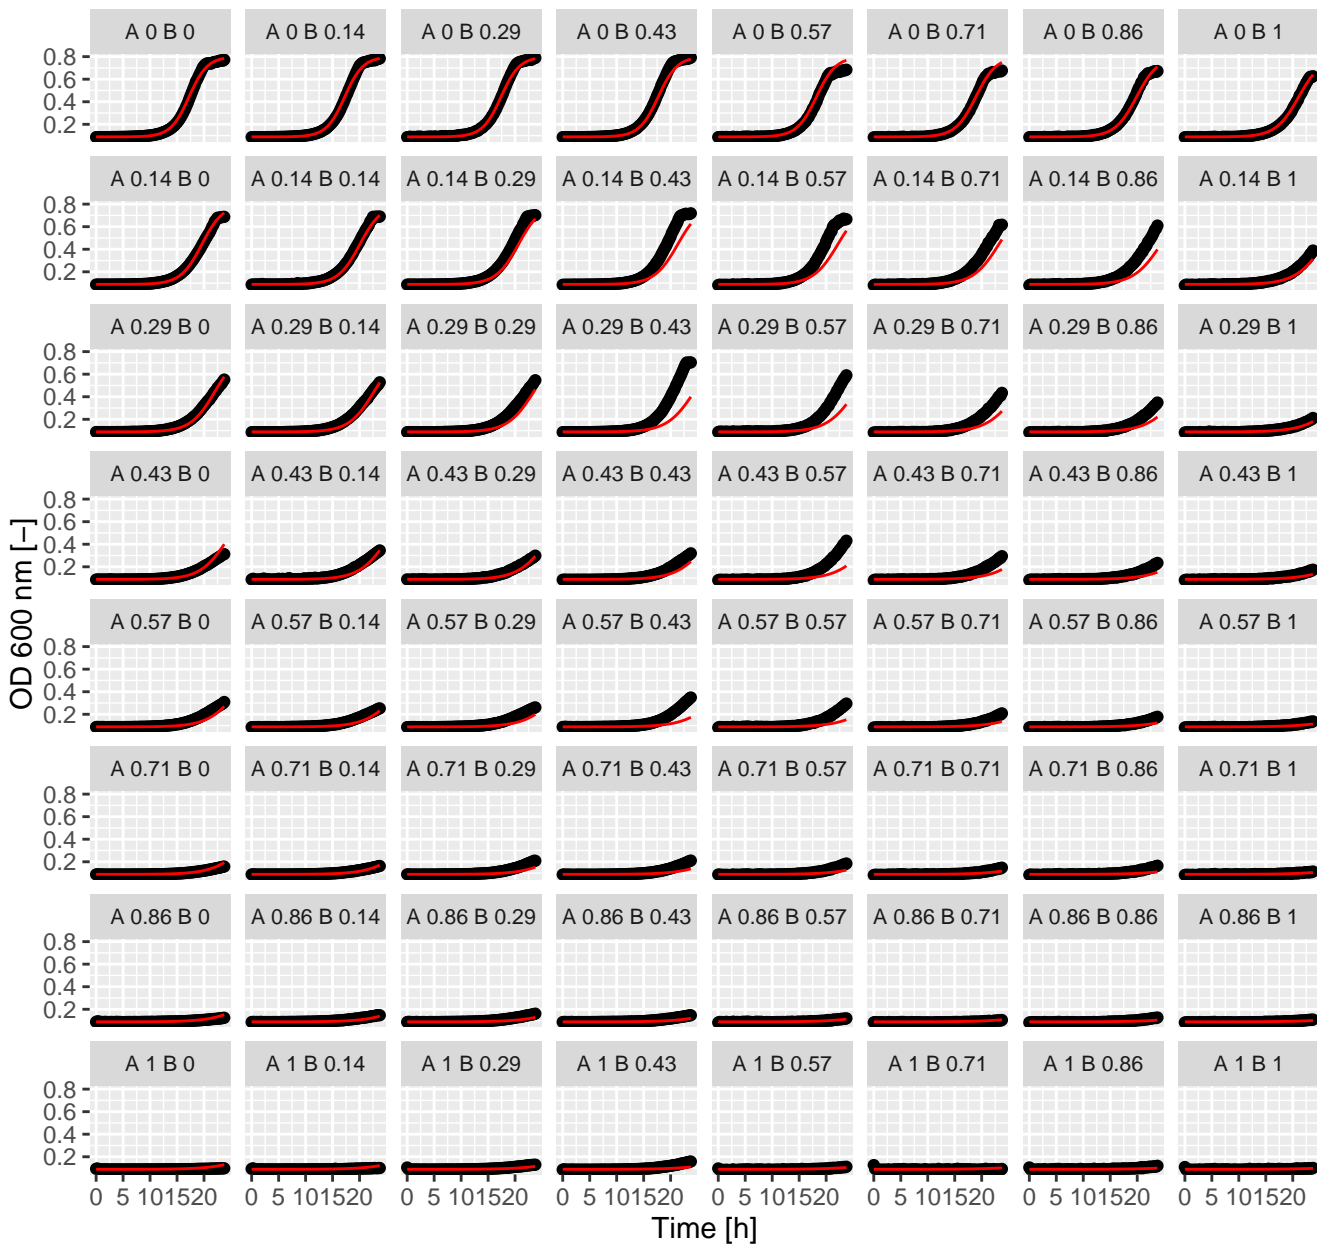

Can.Lat (= Ax.Bx) full GPDI  
Int\_AB = 3.97 and Int\_BA = -0.4 at EC50

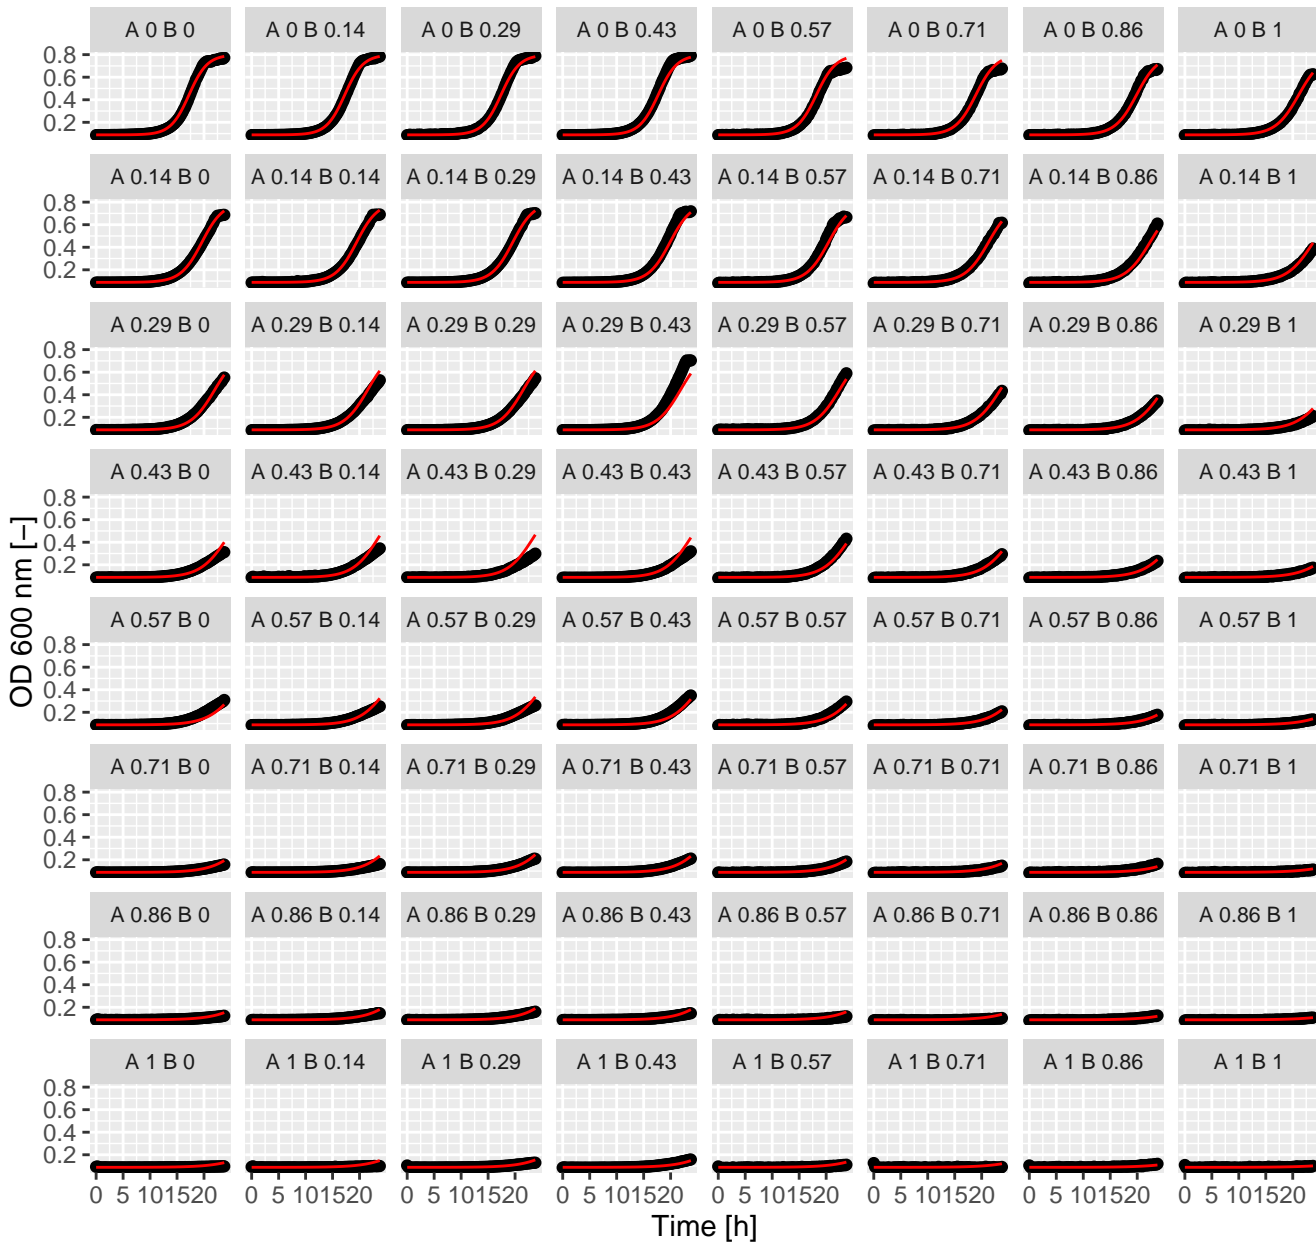



Can.Pen (= Ax.Bx) exp. additivity (LA)  
Int\_AB = 0 and Int\_BA = 0 at EC50

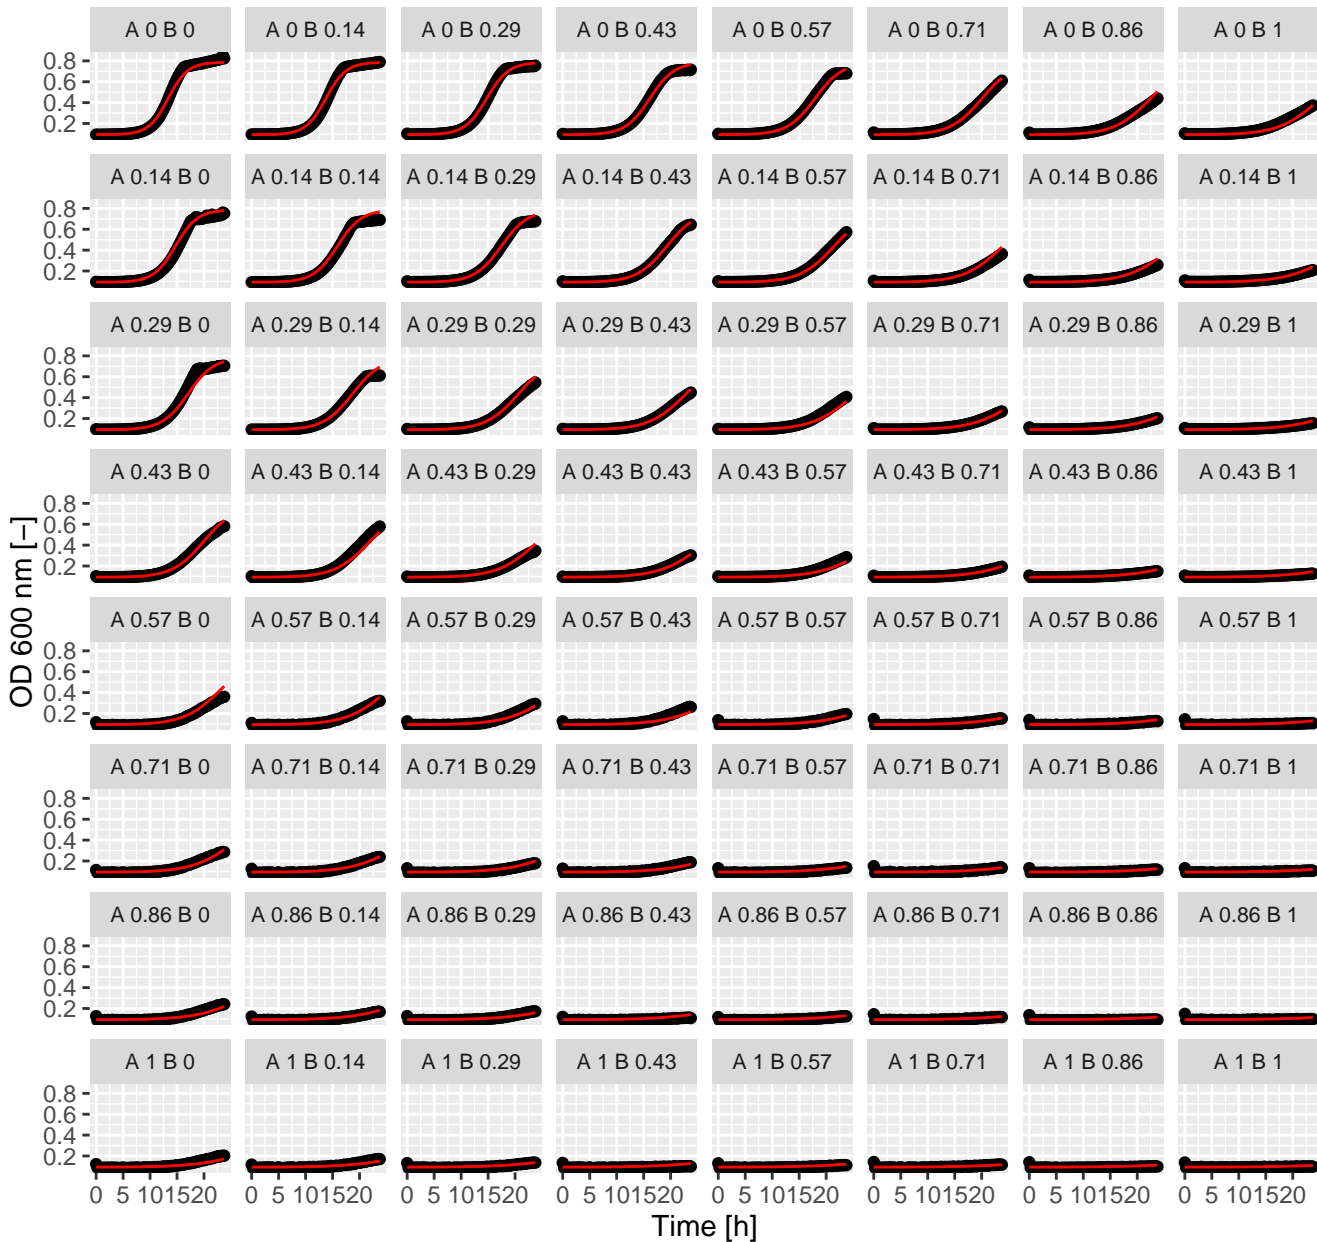

Can.Pen (= Ax.Bx) full GPDI  
Int\_AB = 0.09 and Int\_BA = -0.05 at EC50

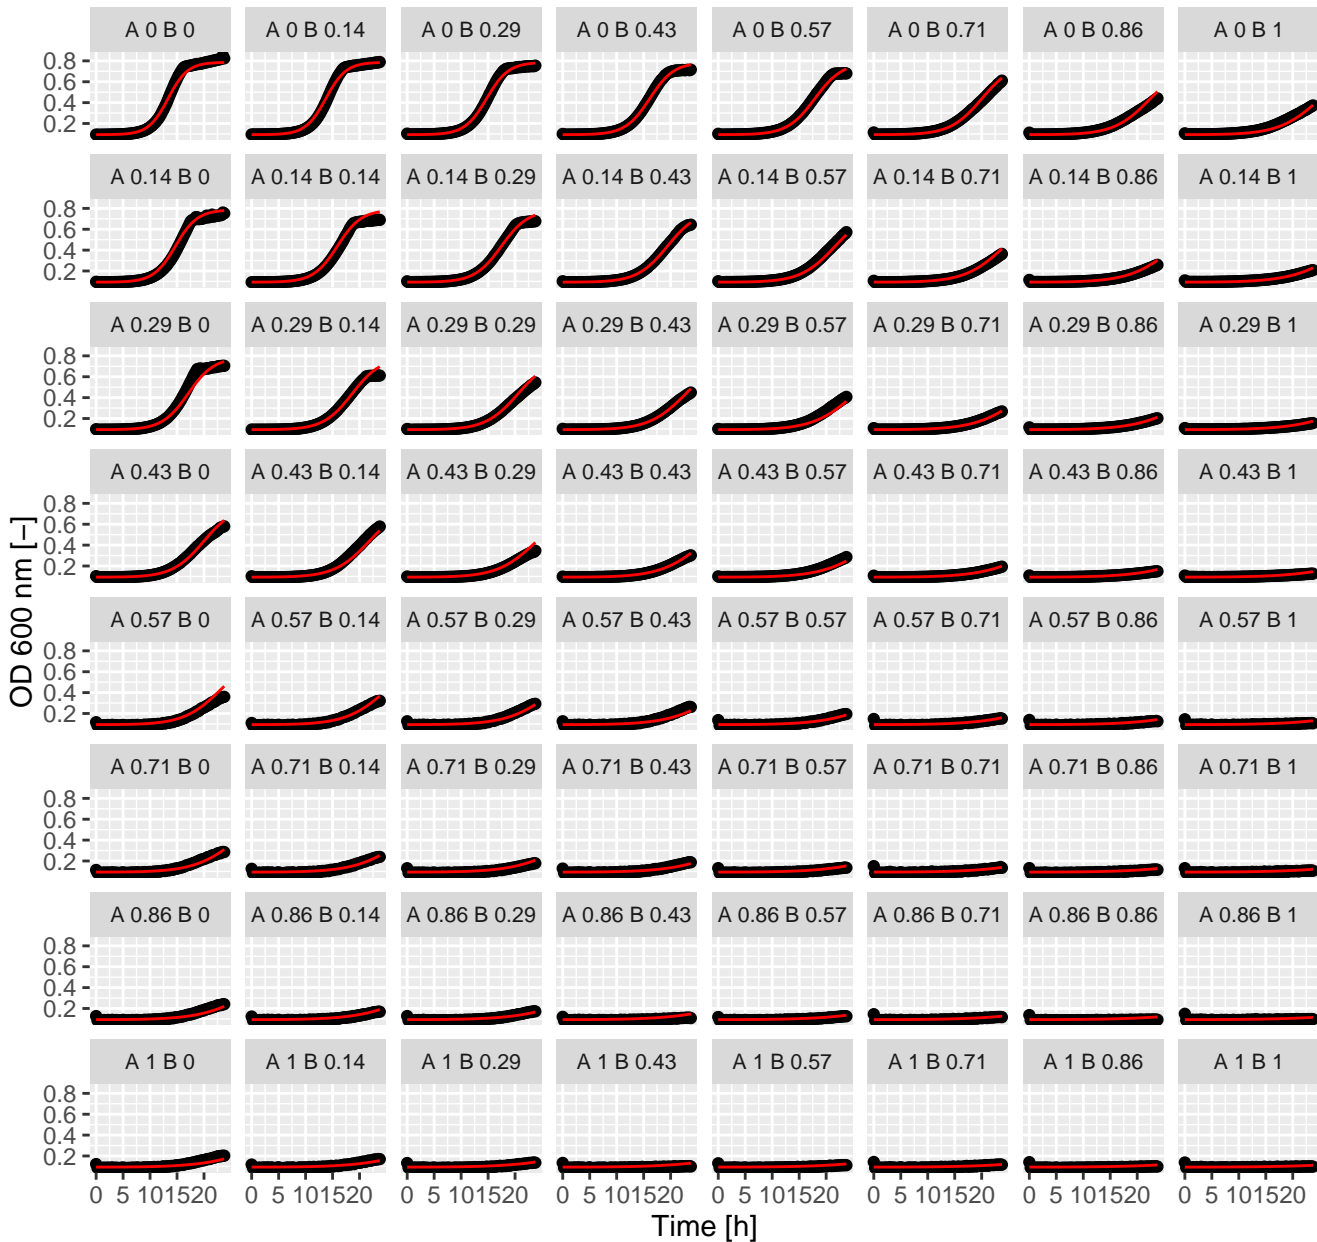

Can.Sta (= Ax.Bx) exp. additivity (LA)  
Int\_AB = 0 and Int\_BA = 0 at EC50

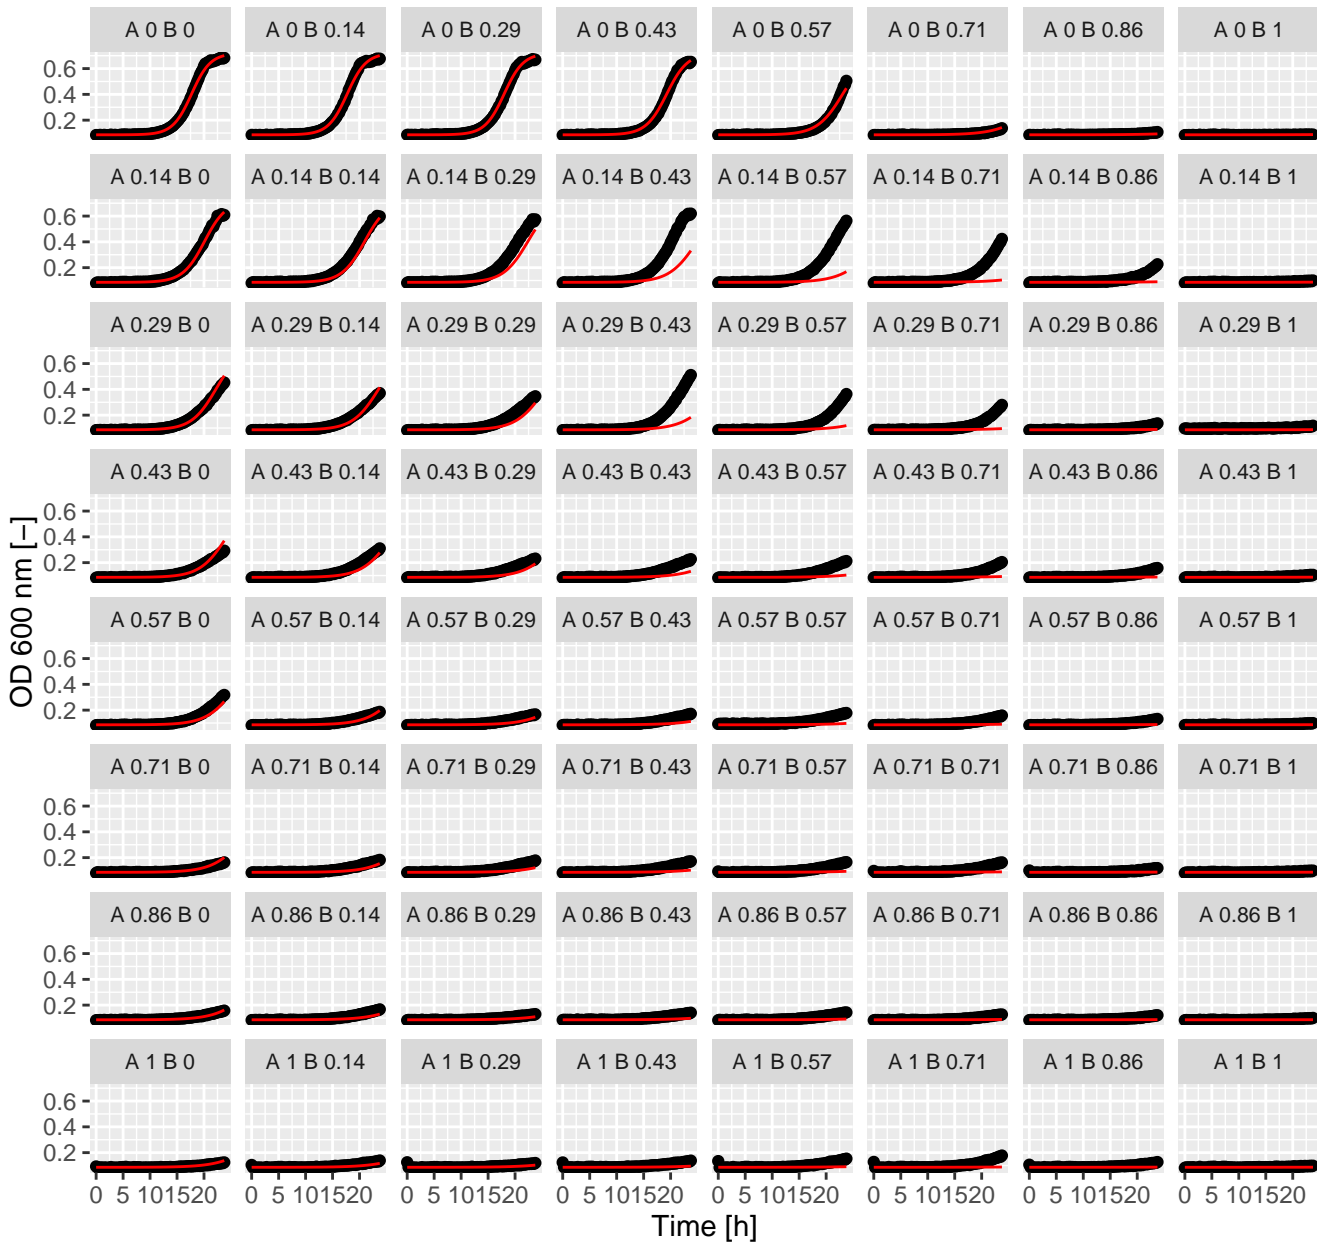

Can.Sta (= Ax.Bx) full GPDI  
Int\_AB = 0.87 and Int\_BA = 0.54 at EC50

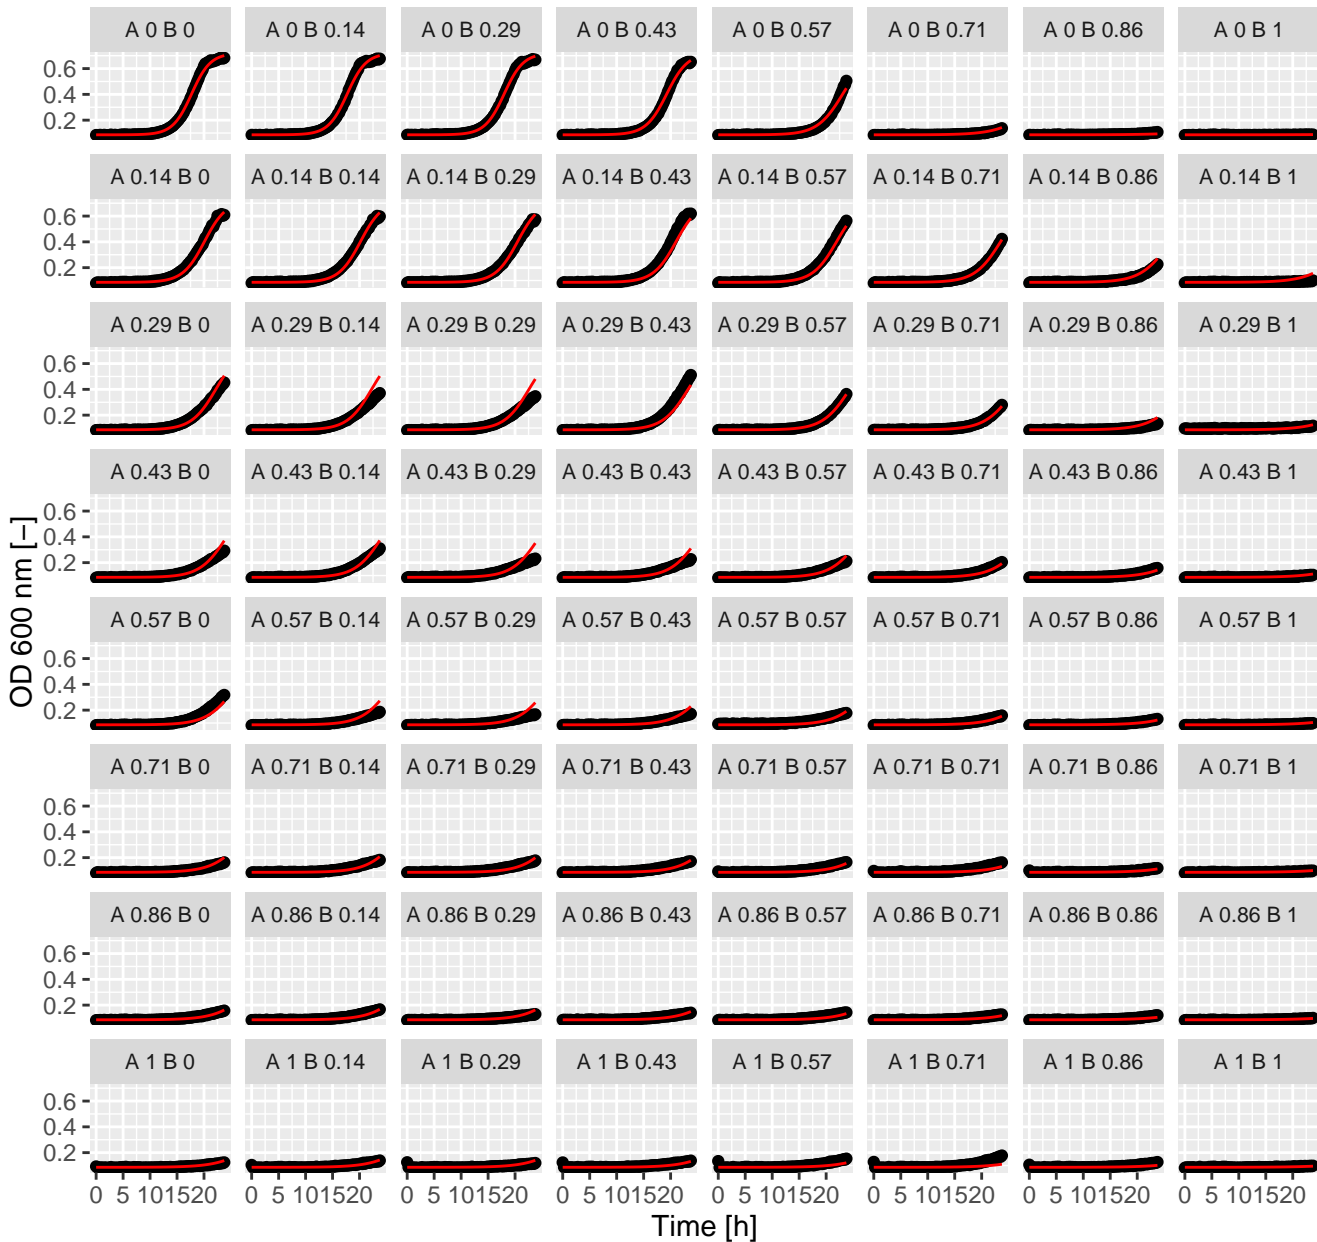

Can.Tac (= Ax.Bx) exp. additivity (LA)  
Int\_AB = 0 and Int\_BA = 0 at EC50

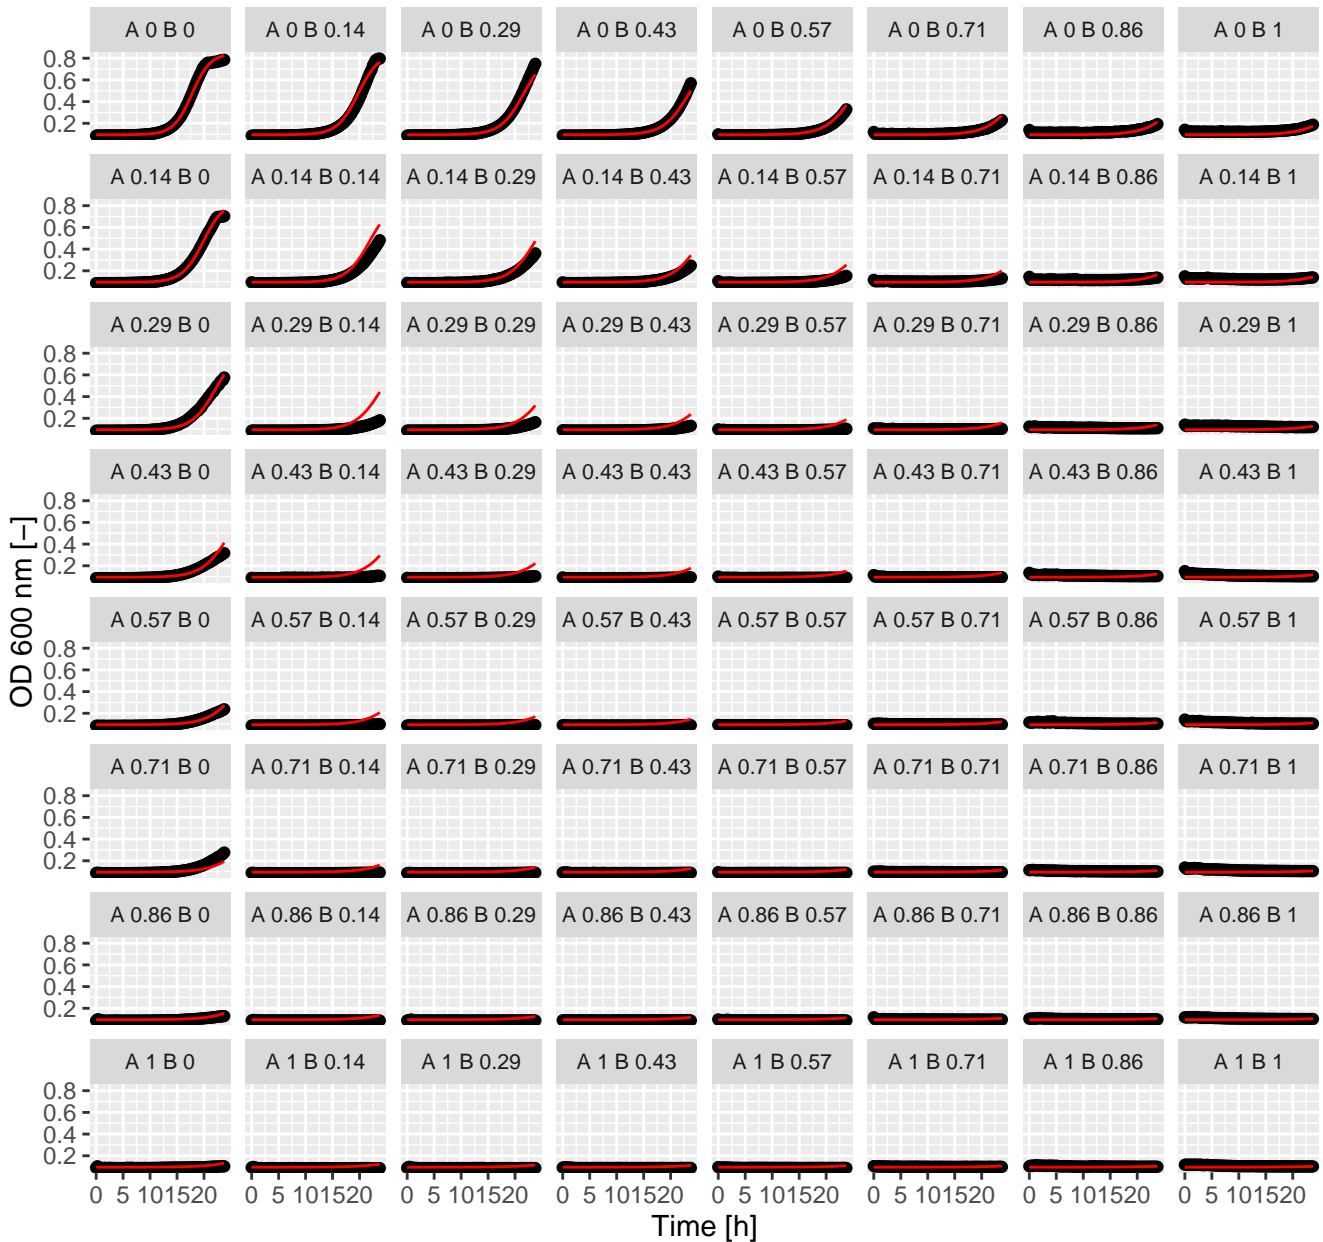

Can.Tac (= Ax.Bx) full GPDI  
Int\_AB = -0.85 and Int\_BA = 1504.91 at EC50

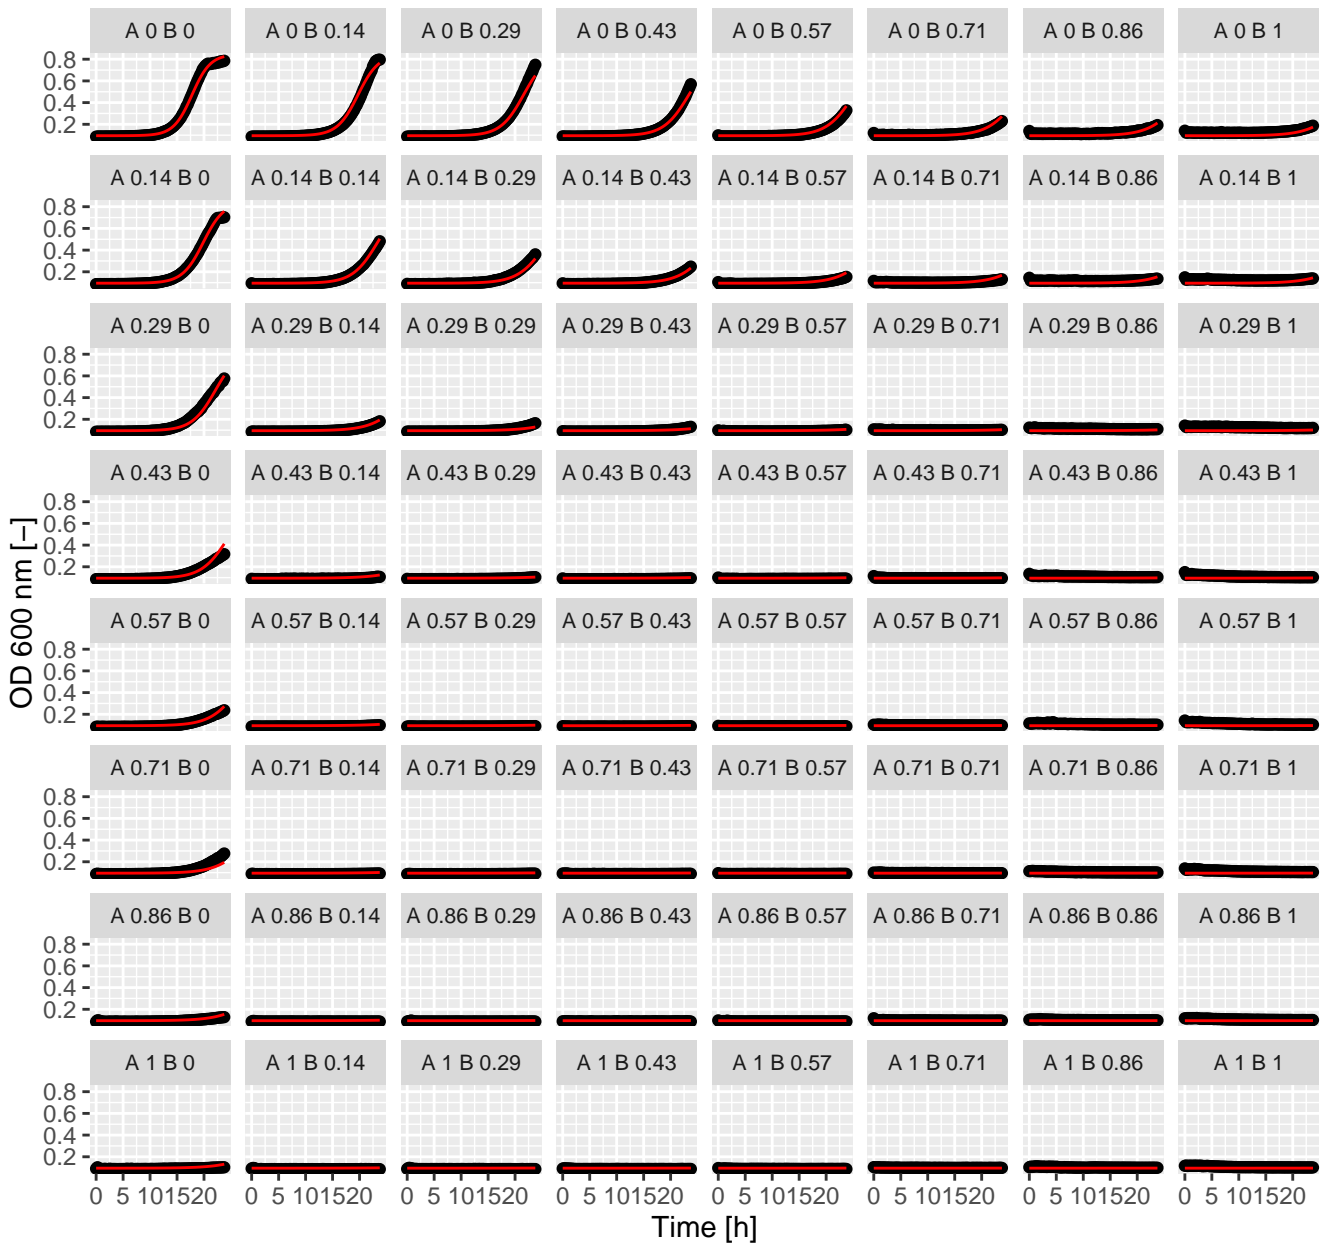

Can.Ter (= Ax.Bx) exp. additivity (LA)  
Int\_AB = 0 and Int\_BA = 0 at EC50

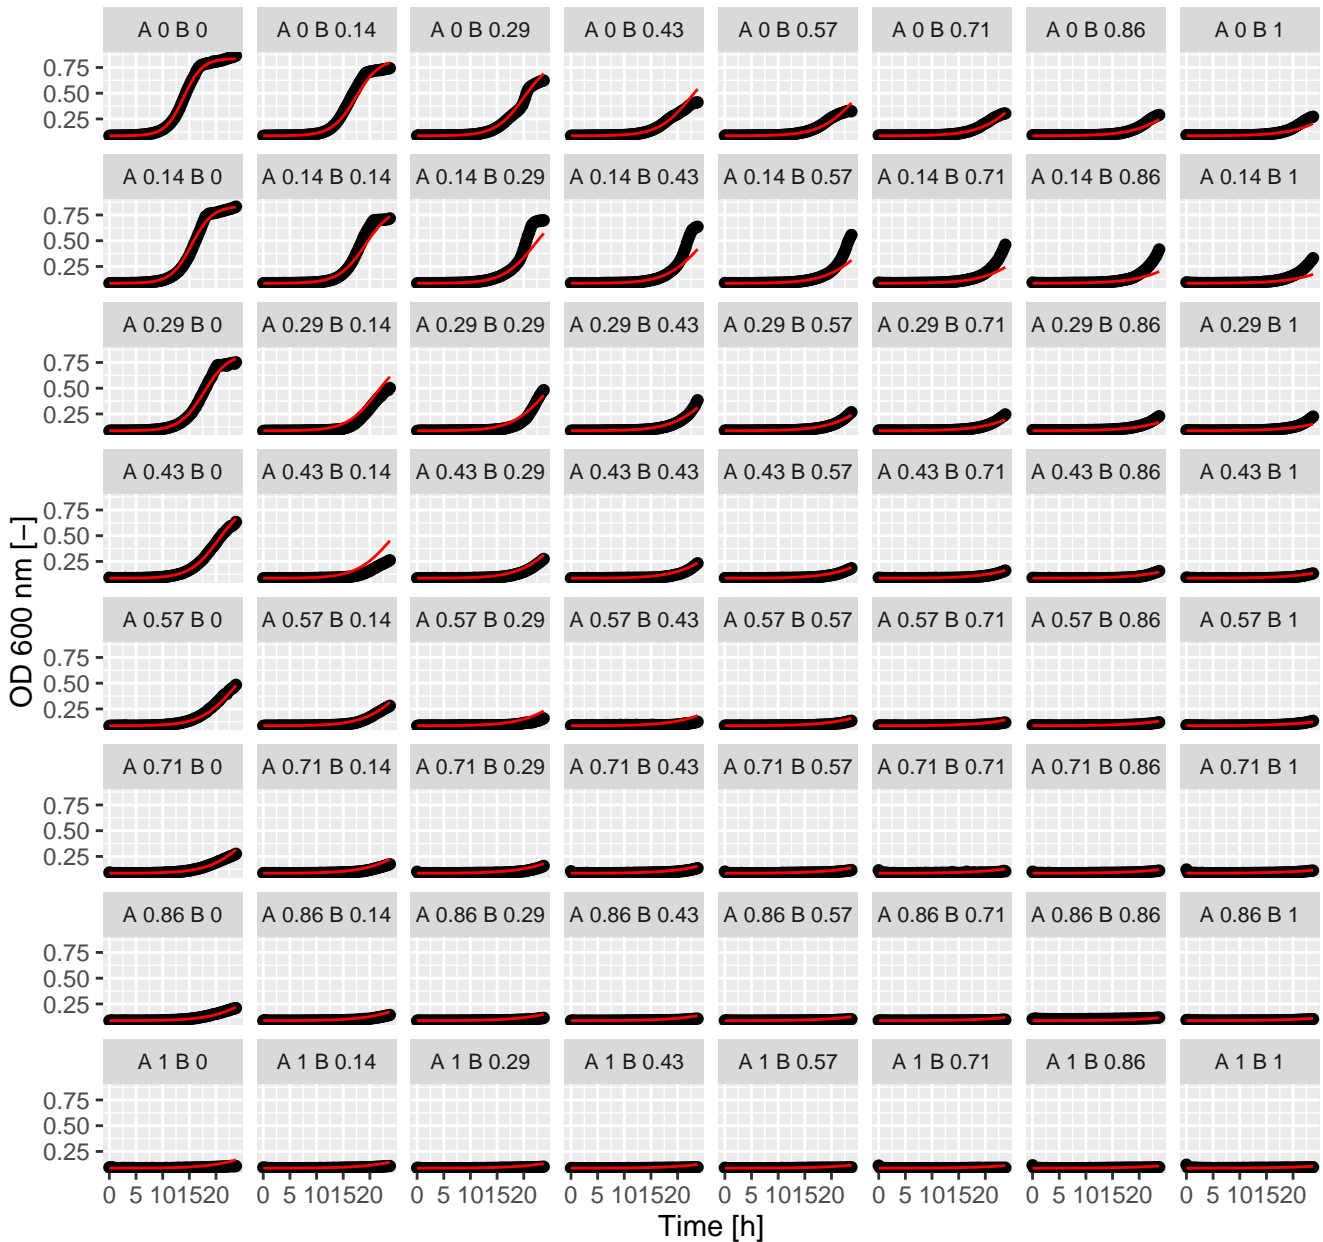

Can.Ter (= Ax.Bx) full GPD1  
Int\_AB = -0.45 and Int\_BA = 1.07 at EC50

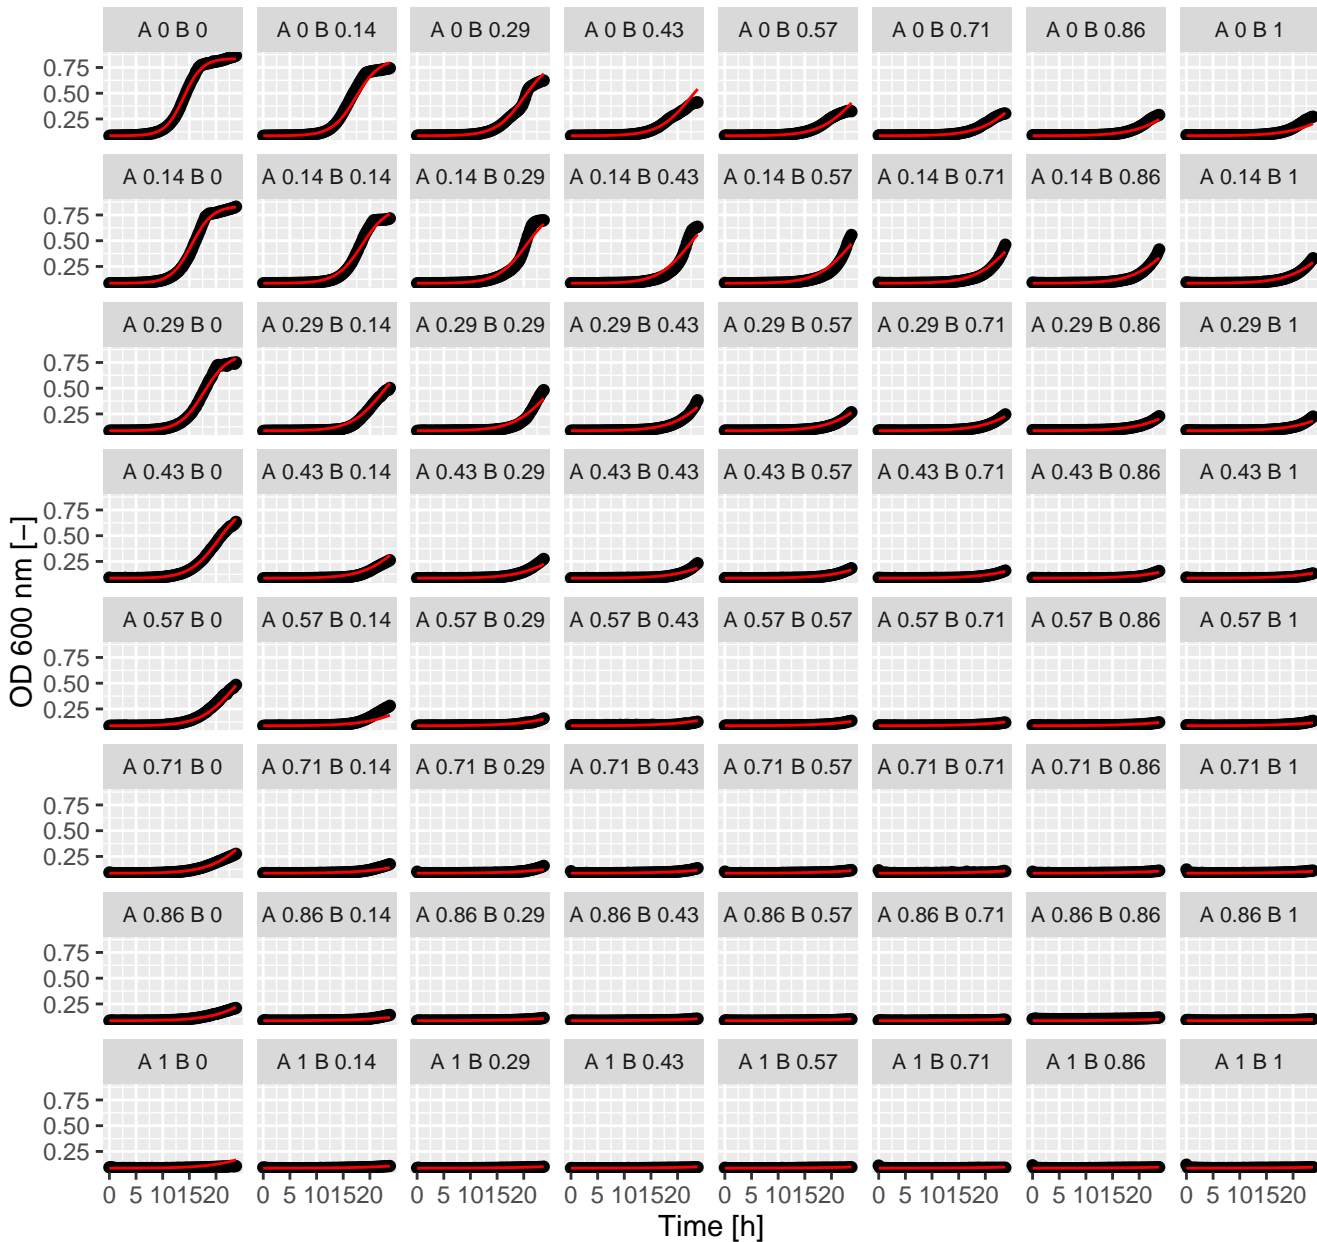



Chl.Chl (= Ax.Bx) exp. additivity (LA)  
Int\_AB = 0 and Int\_BA = 0 at EC50

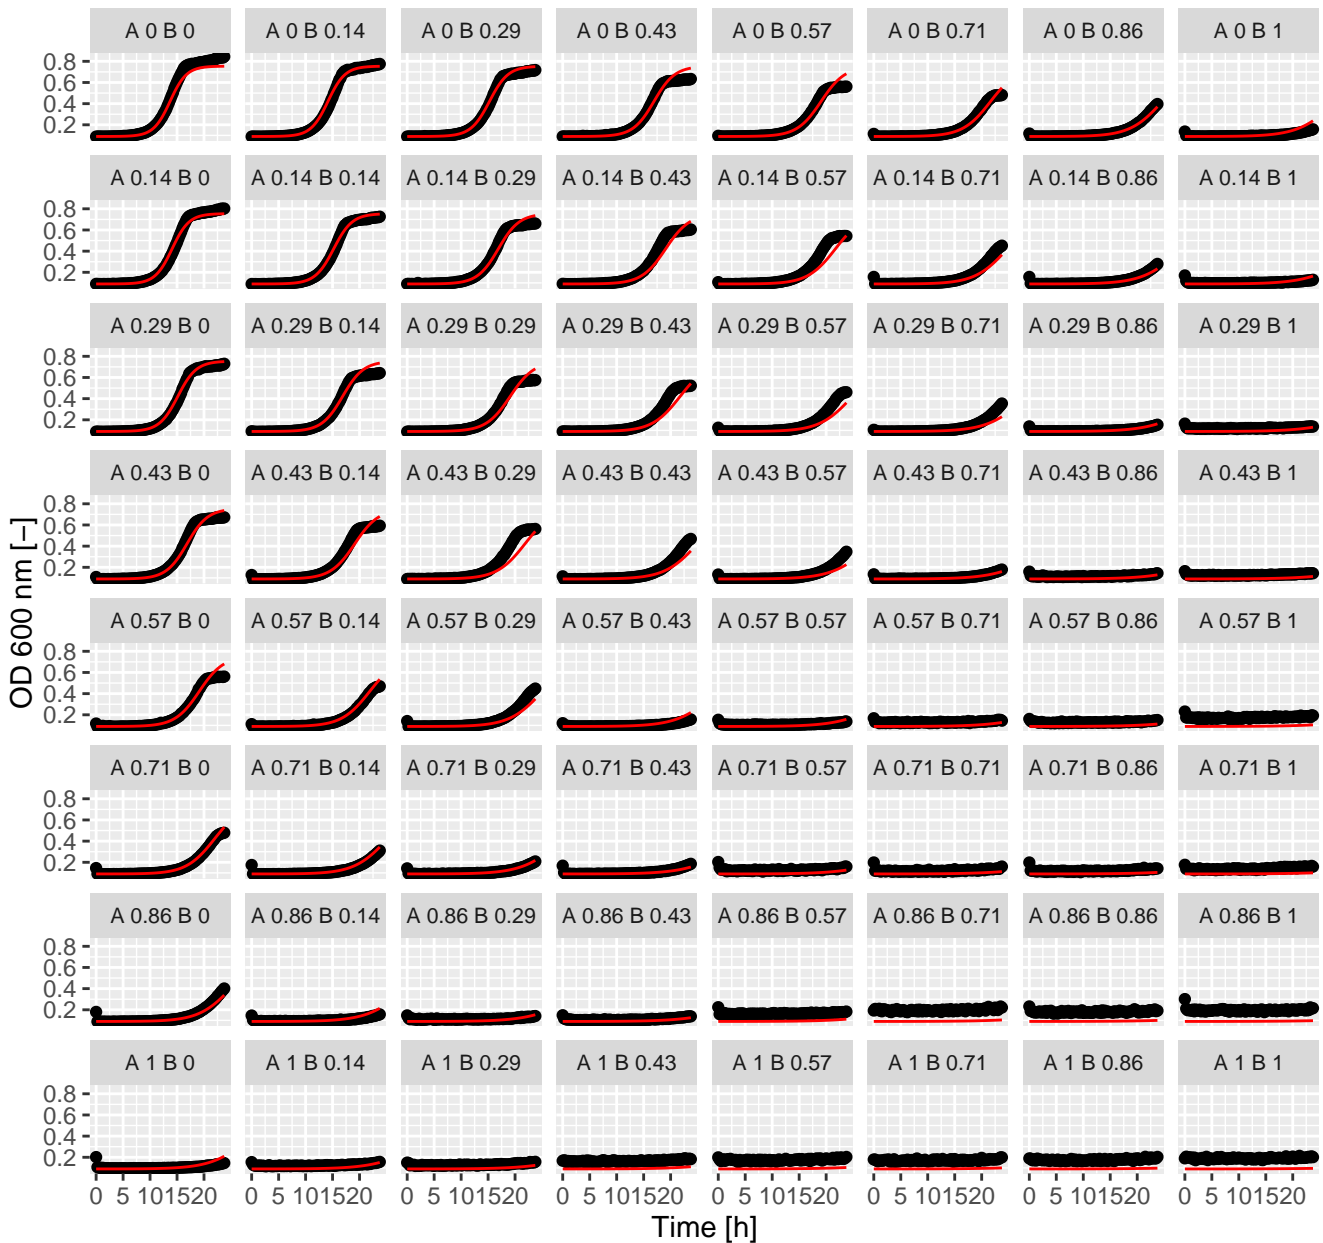

Chl.Chl (= Ax.Bx) full GPDI  
Int\_AB = 0.05 and Int\_BA = 0.48 at EC50

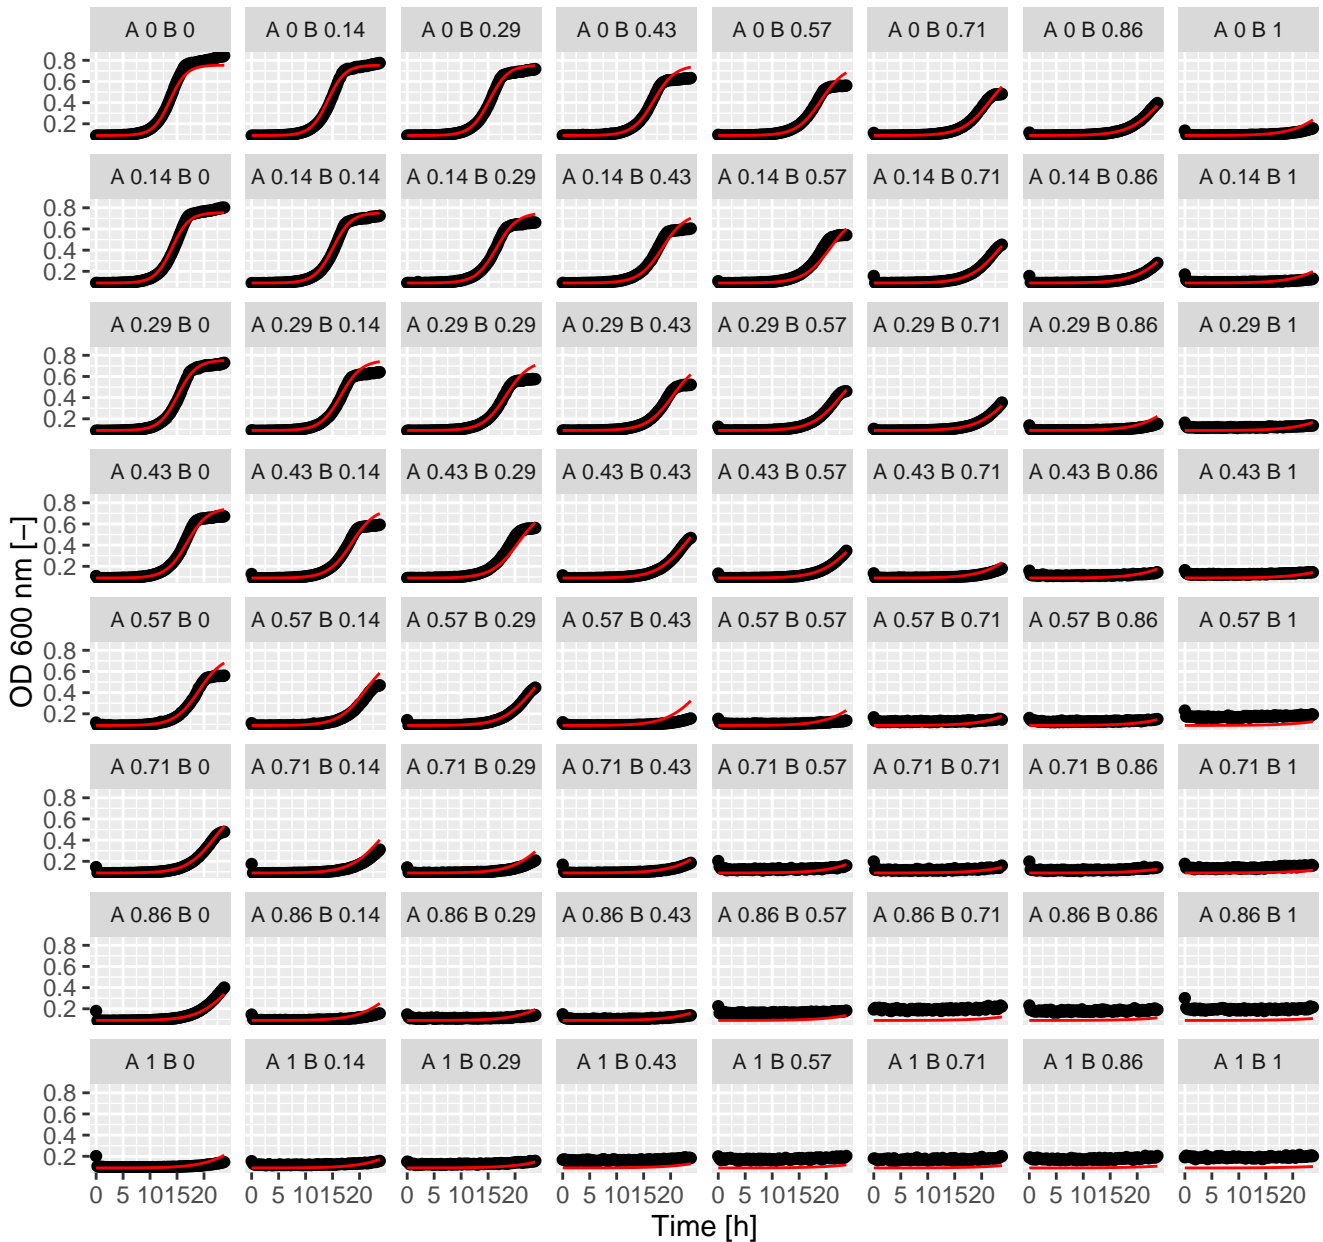

Chl.Lat (= Ax.Bx) exp. additivity (LA)  
Int\_AB = 0 and Int\_BA = 0 at EC50

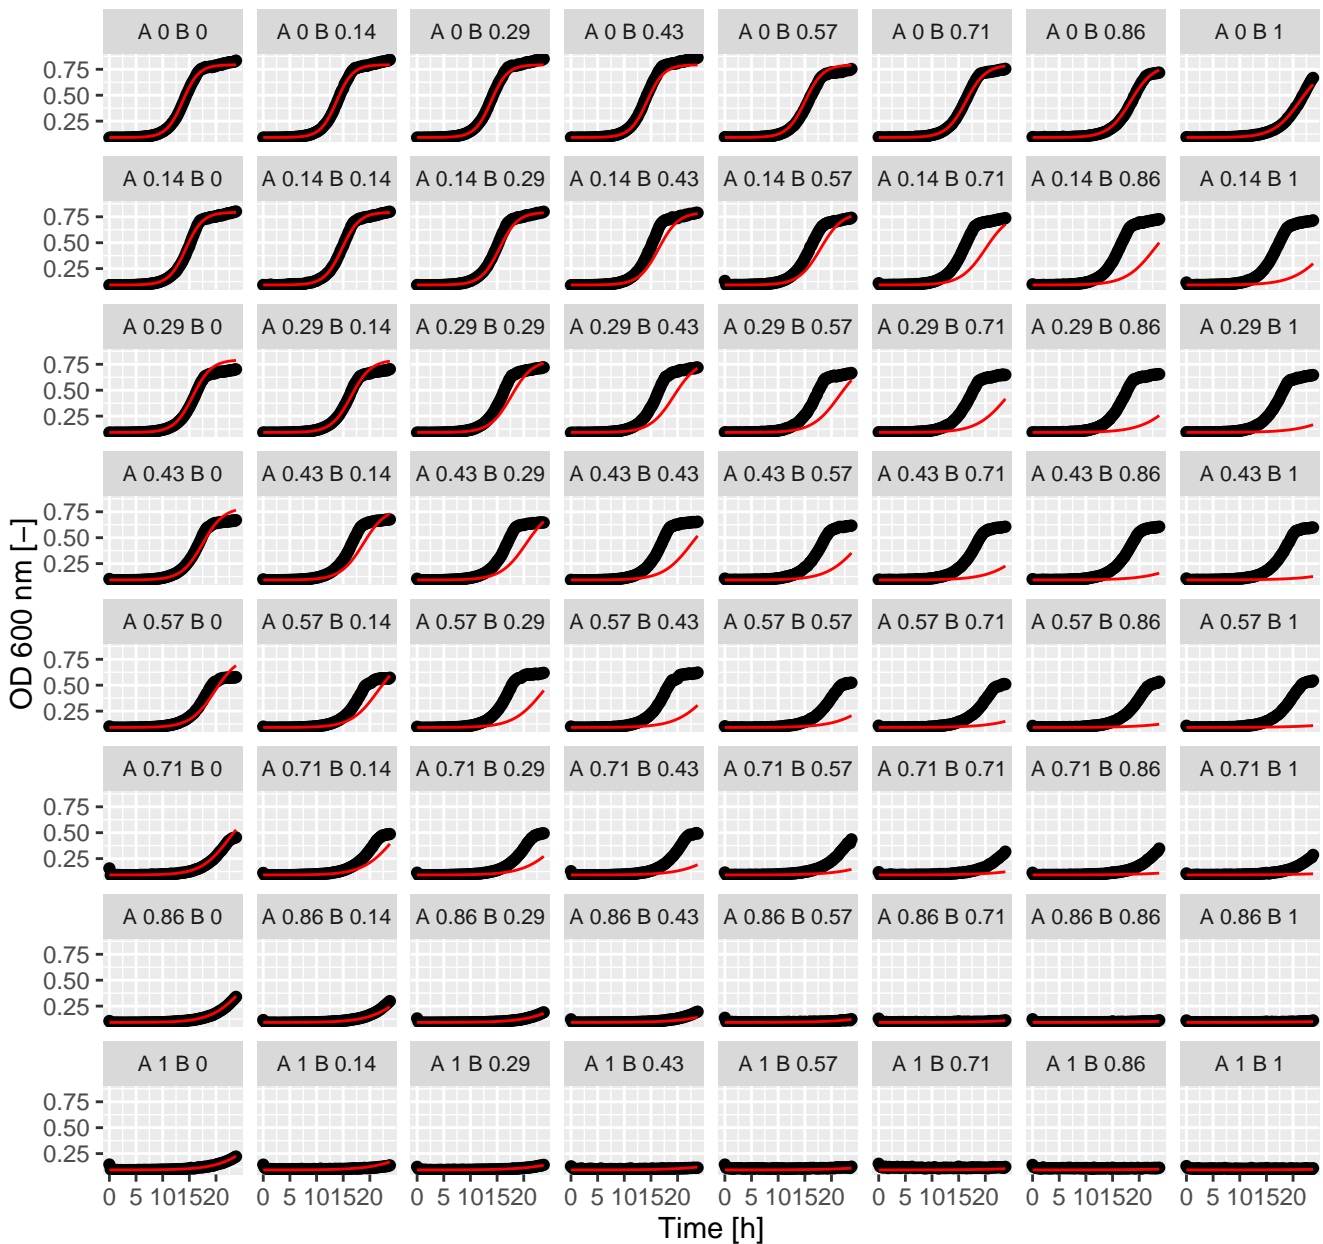

Chl.Lat (= Ax.Bx) full GPDI  
Int\_AB = 0.06 and Int\_BA = 3.24 at EC50

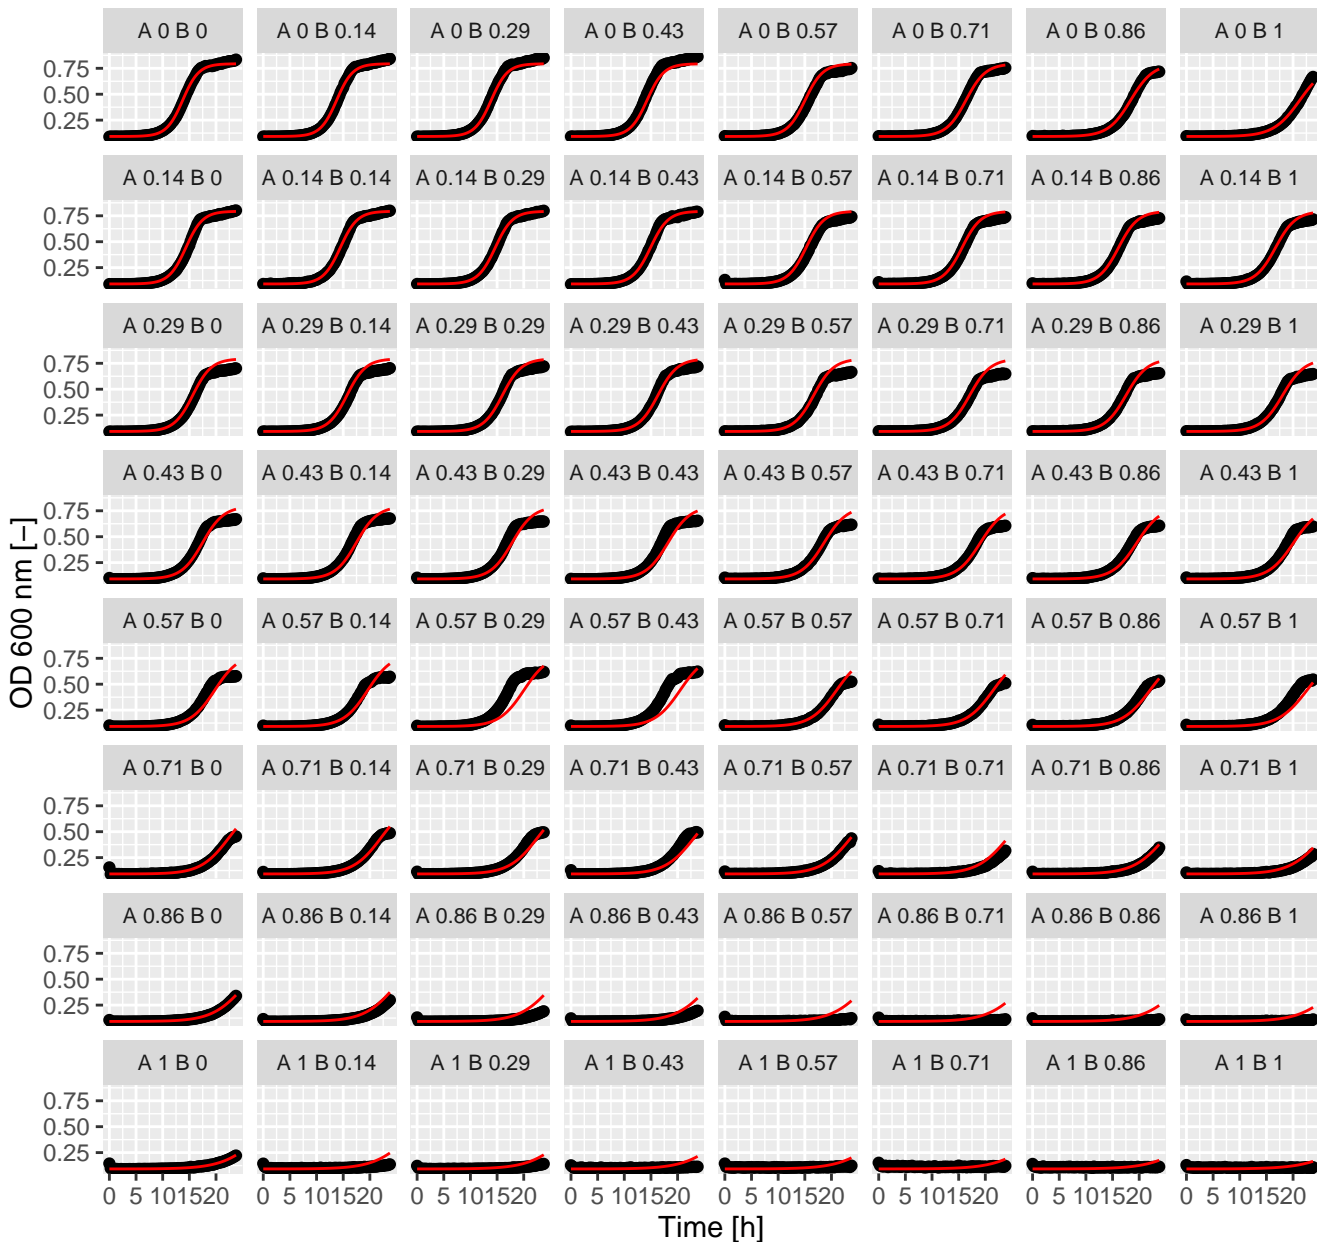

Chl.Pen (= Ax.Bx) exp. additivity (LA)  
 Int\_AB = 0 and Int\_BA = 0 at EC50

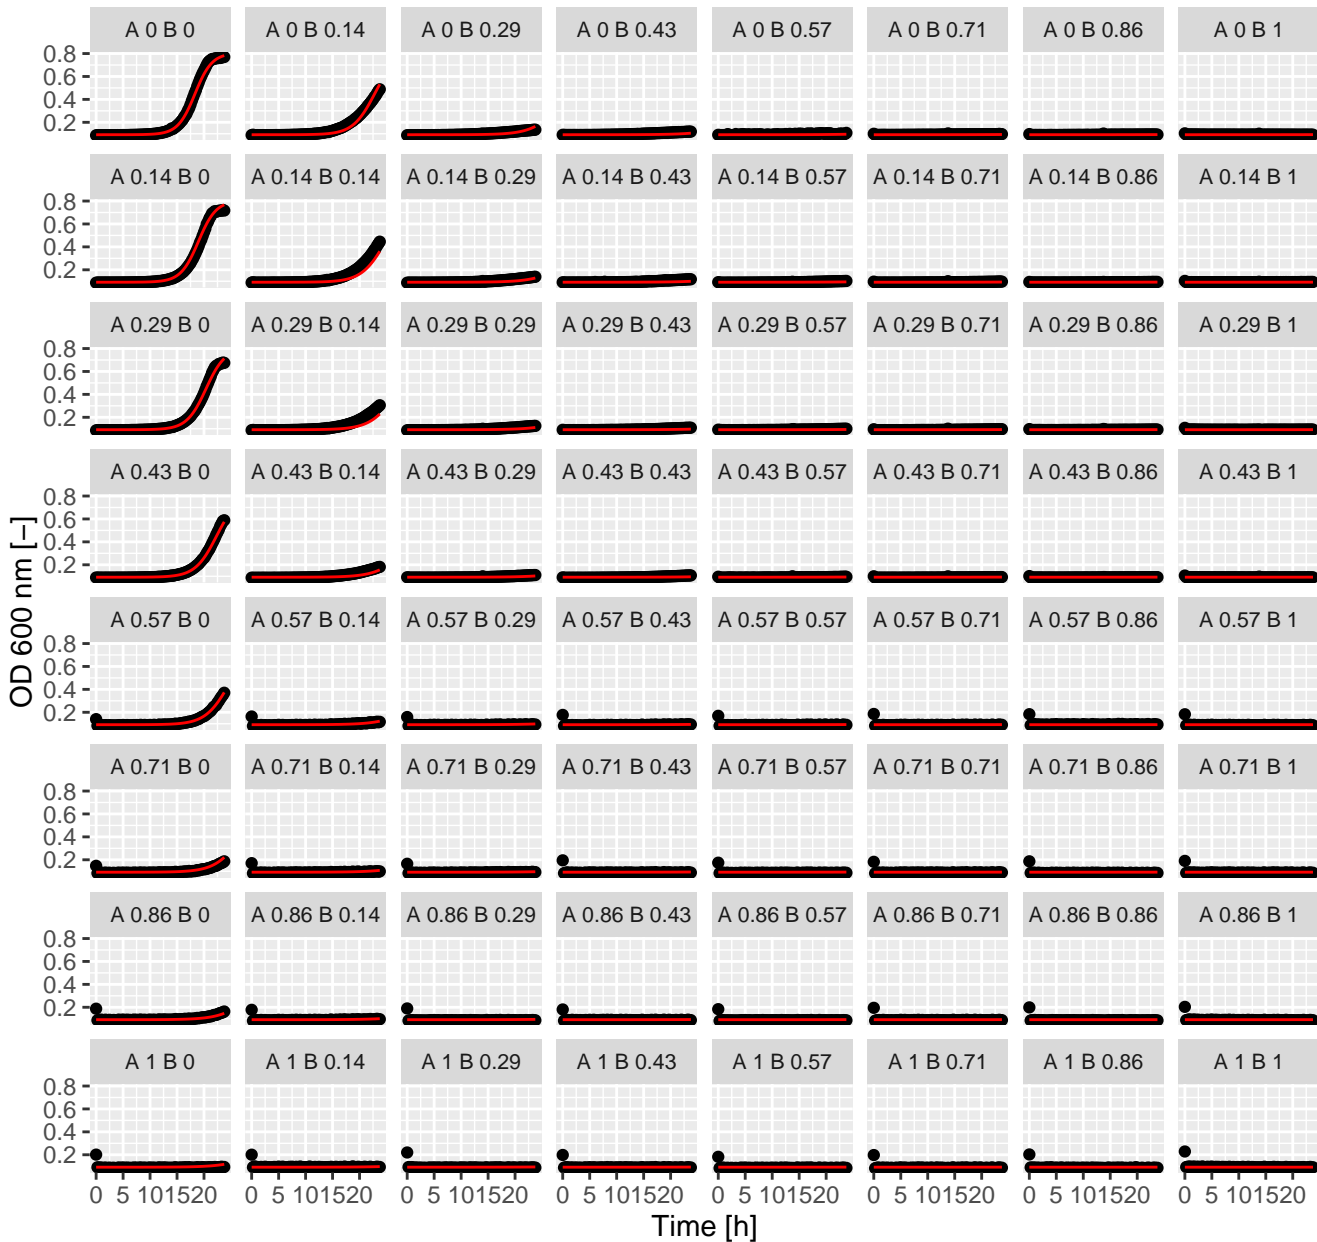

Chl.Pen (= Ax.Bx) full GPDI  
Int\_AB = -0.44 and Int\_BA = 2.66 at EC50

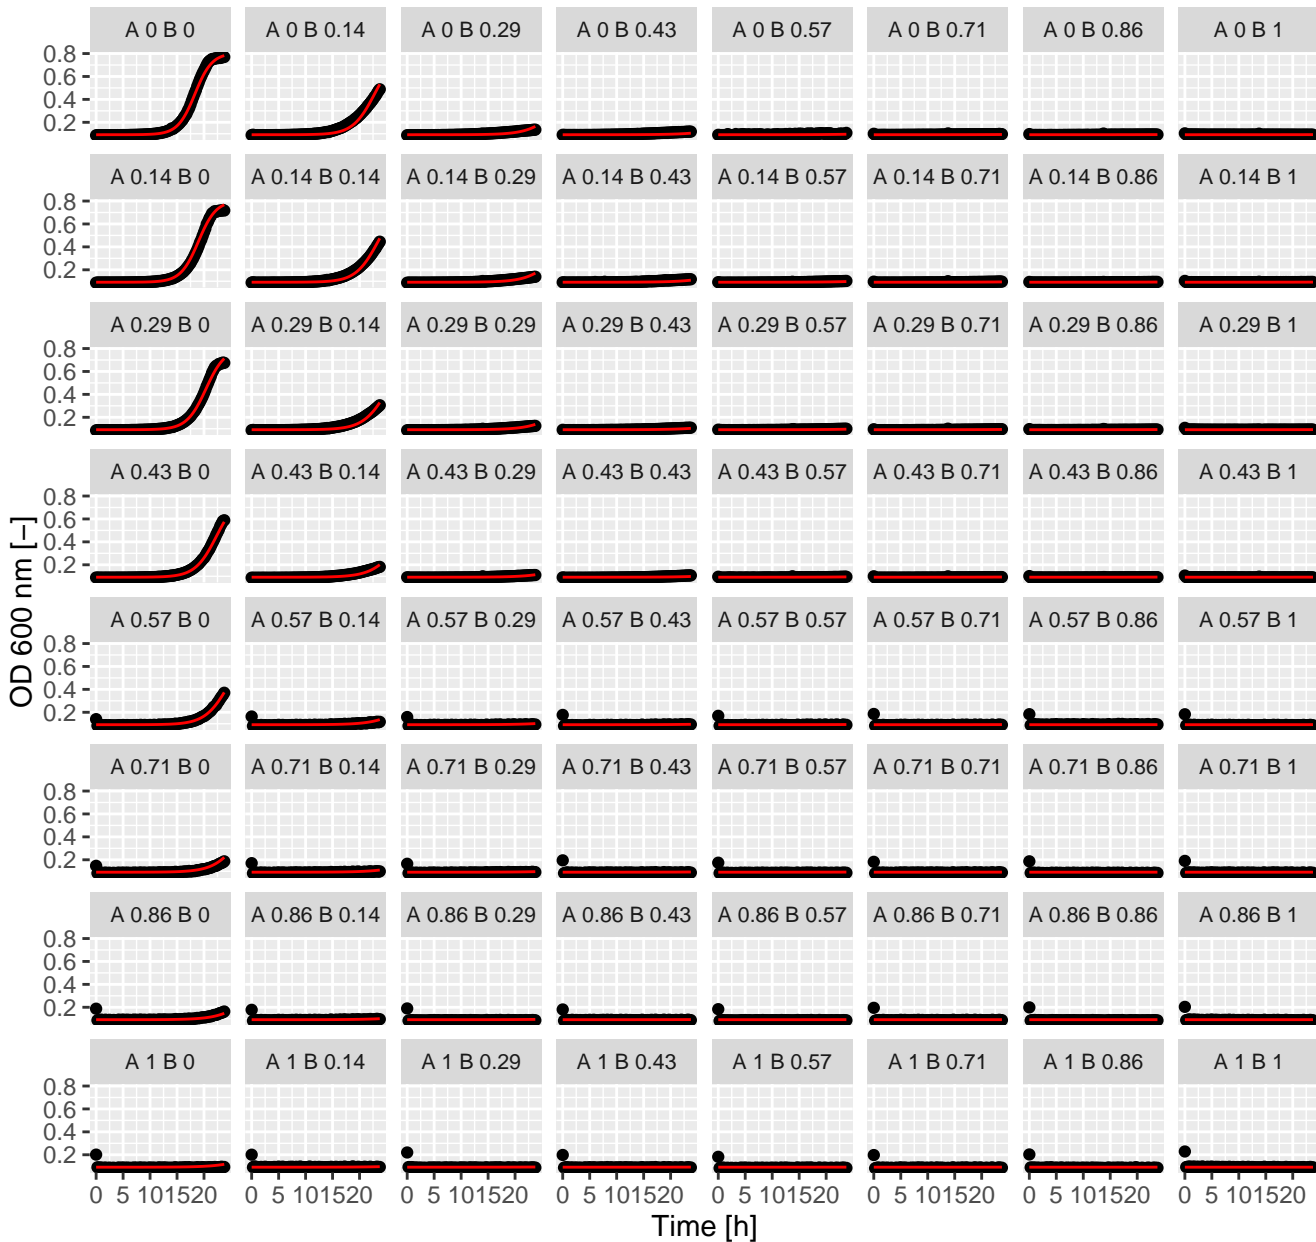

Chl.Sta (= Ax.Bx) exp. additivity (LA)  
 Int\_AB = 0 and Int\_BA = 0 at EC50

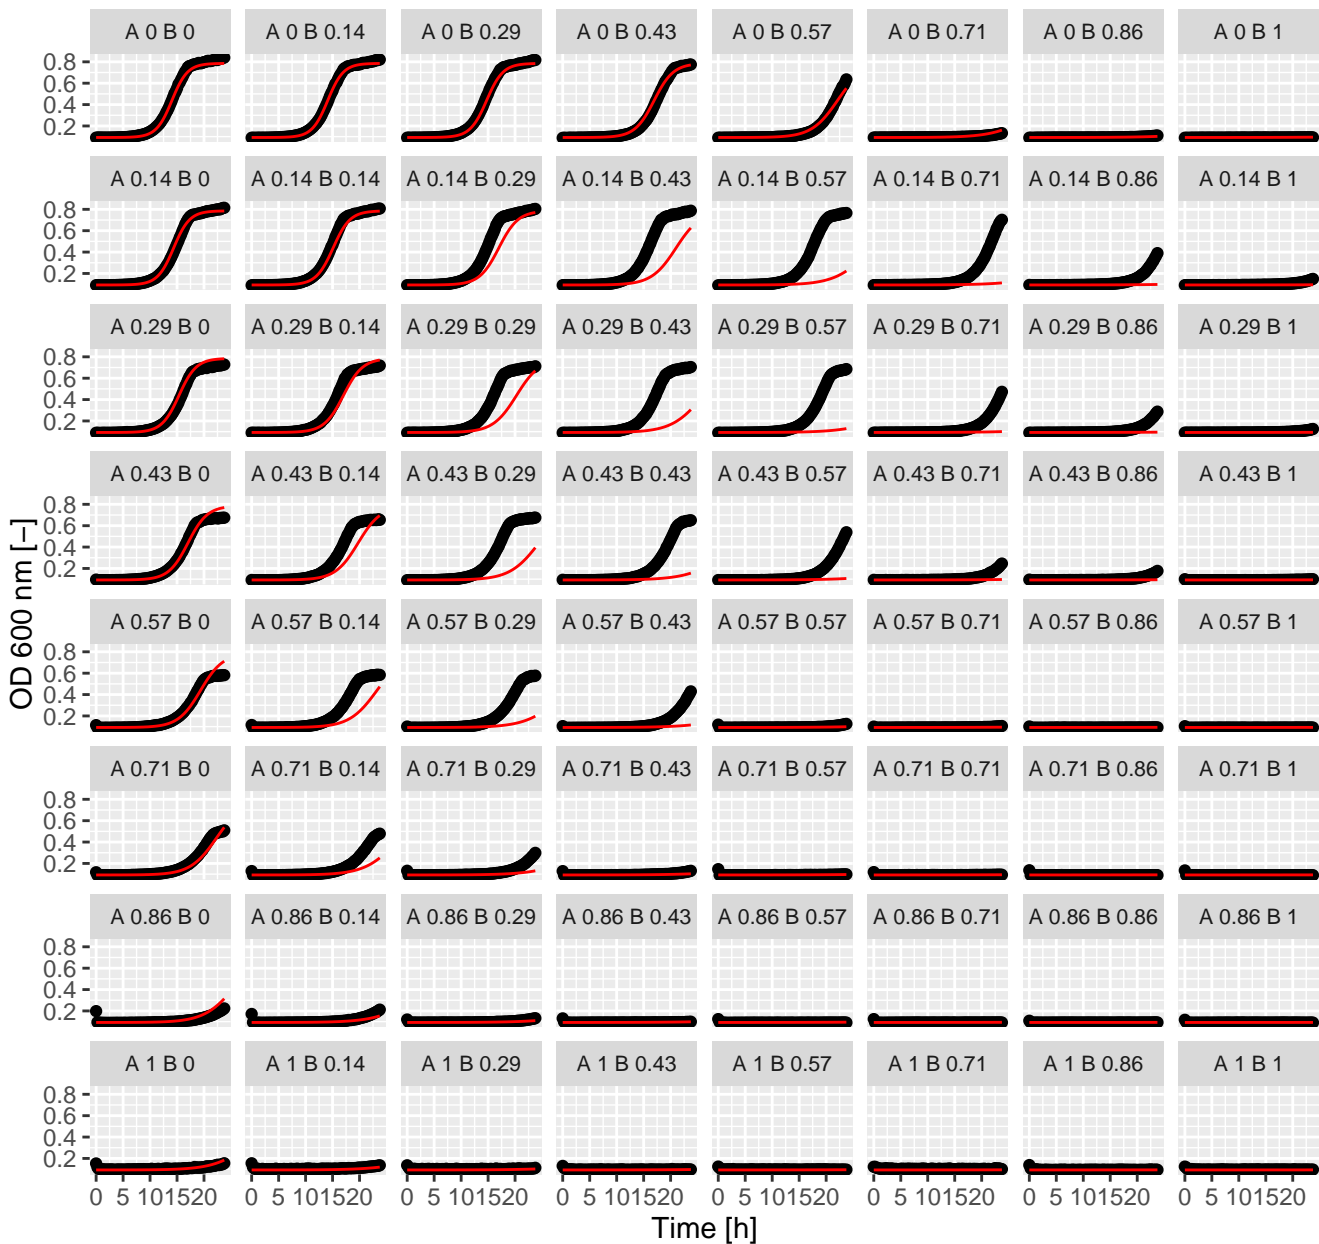

Chl.Sta (= Ax.Bx) full GPDI  
Int\_AB = 0.27 and Int\_BA = 0.77 at EC50

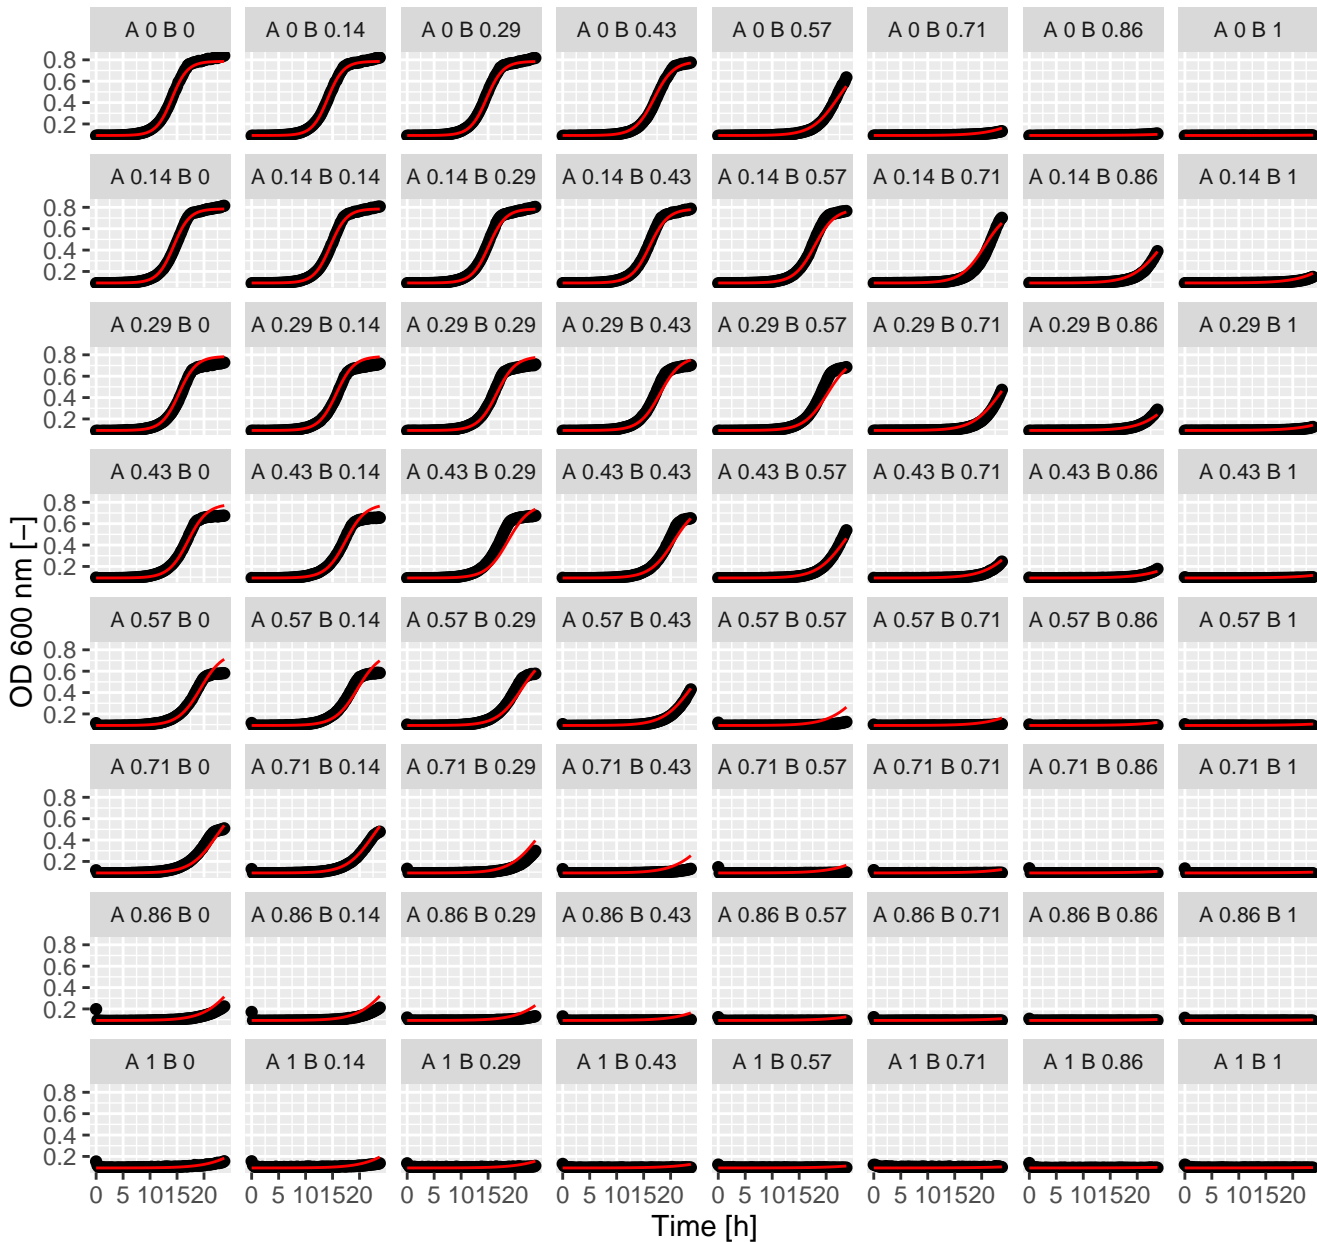



Chl.Tac (= Ax.Bx) exp. additivity (LA)  
Int\_AB = 0 and Int\_BA = 0 at EC50

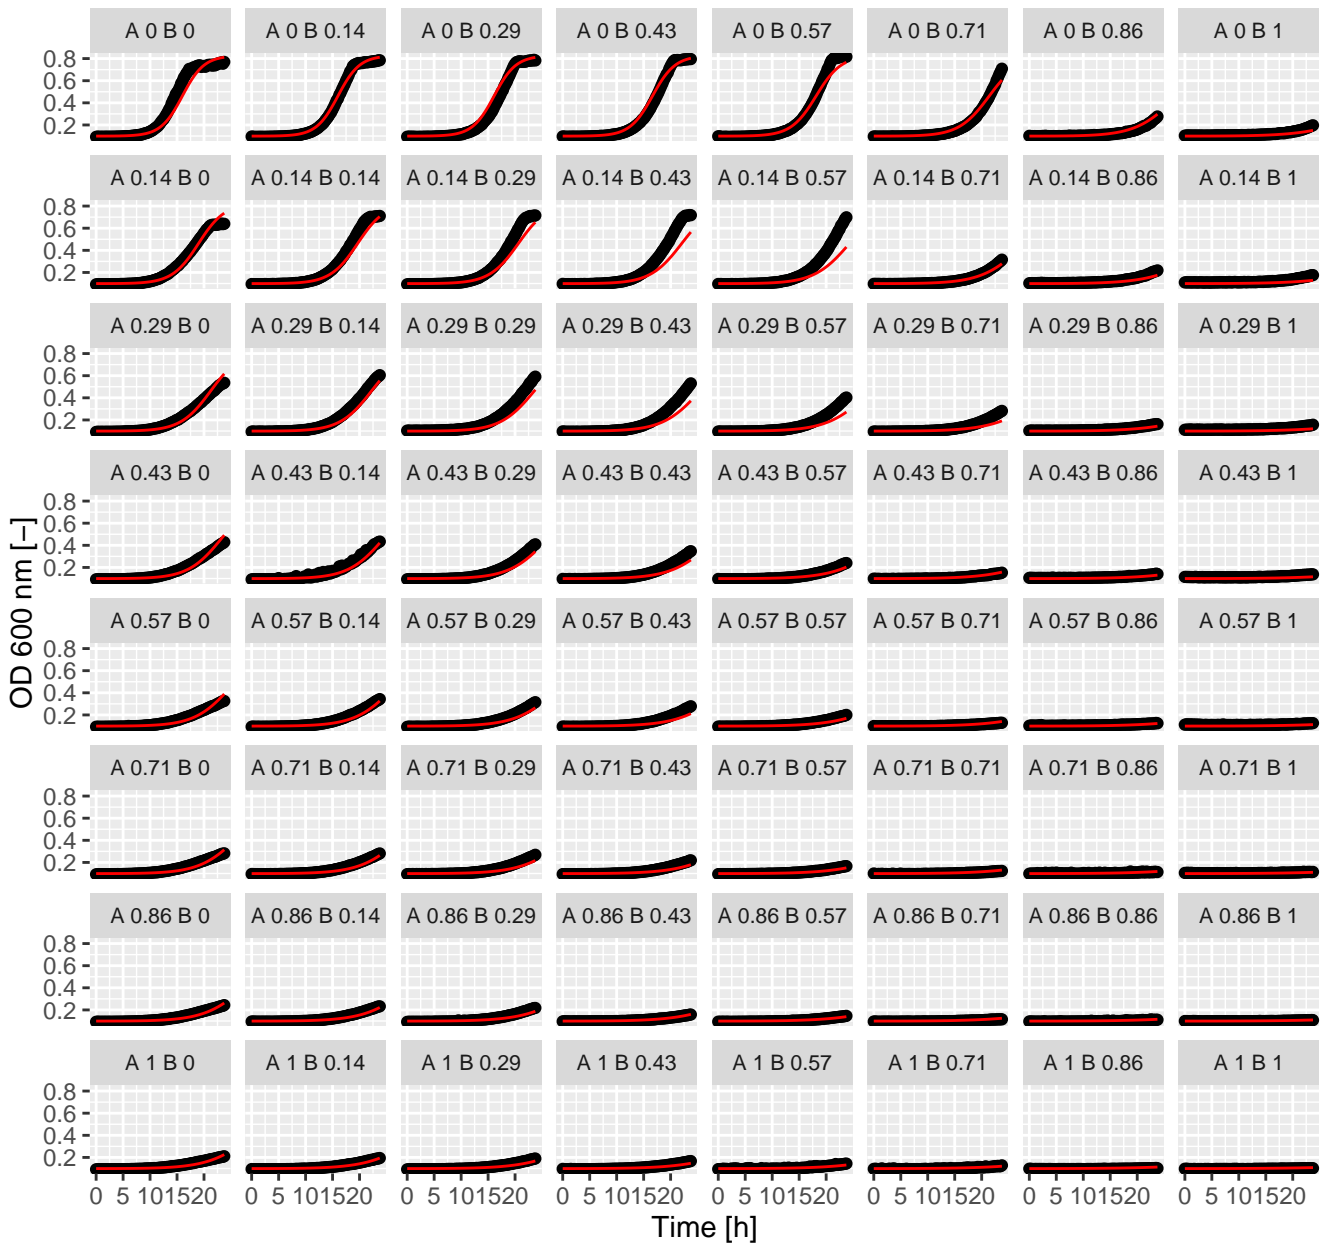

Chl.Tac (= Ax.Bx) full GPDI  
Int\_AB = 0.42 and Int\_BA = 0.09 at EC50

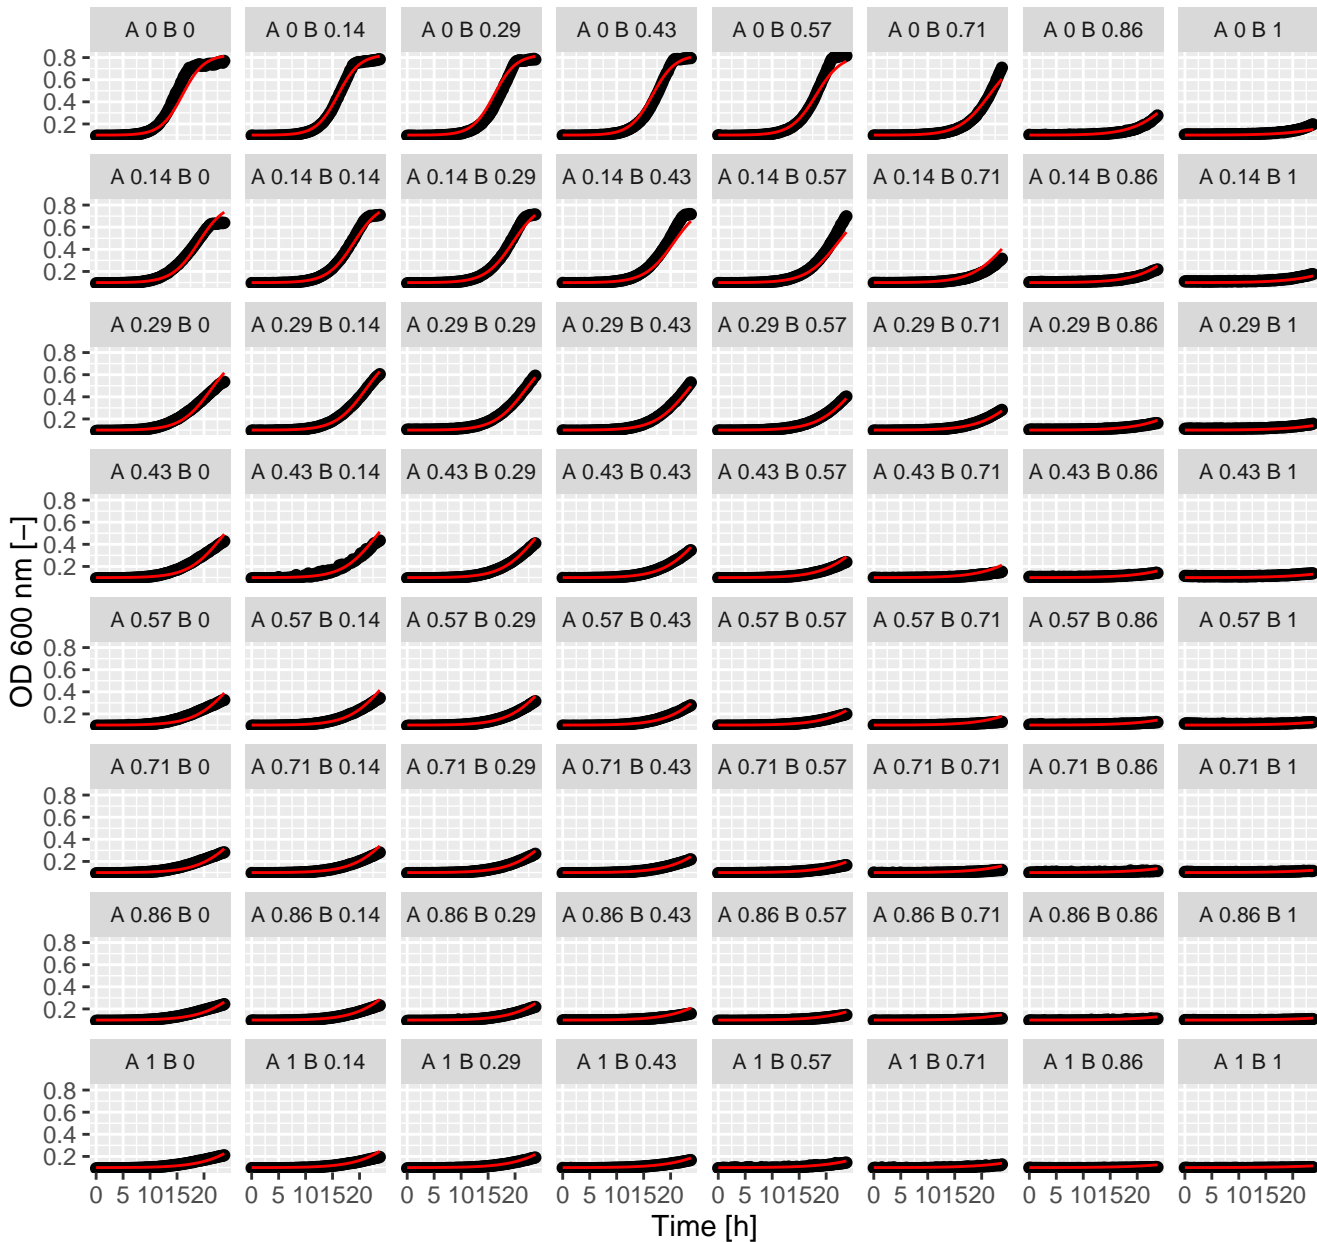

Chl.Ter (= Ax.Bx) exp. additivity (LA)  
Int\_AB = 0 and Int\_BA = 0 at EC50

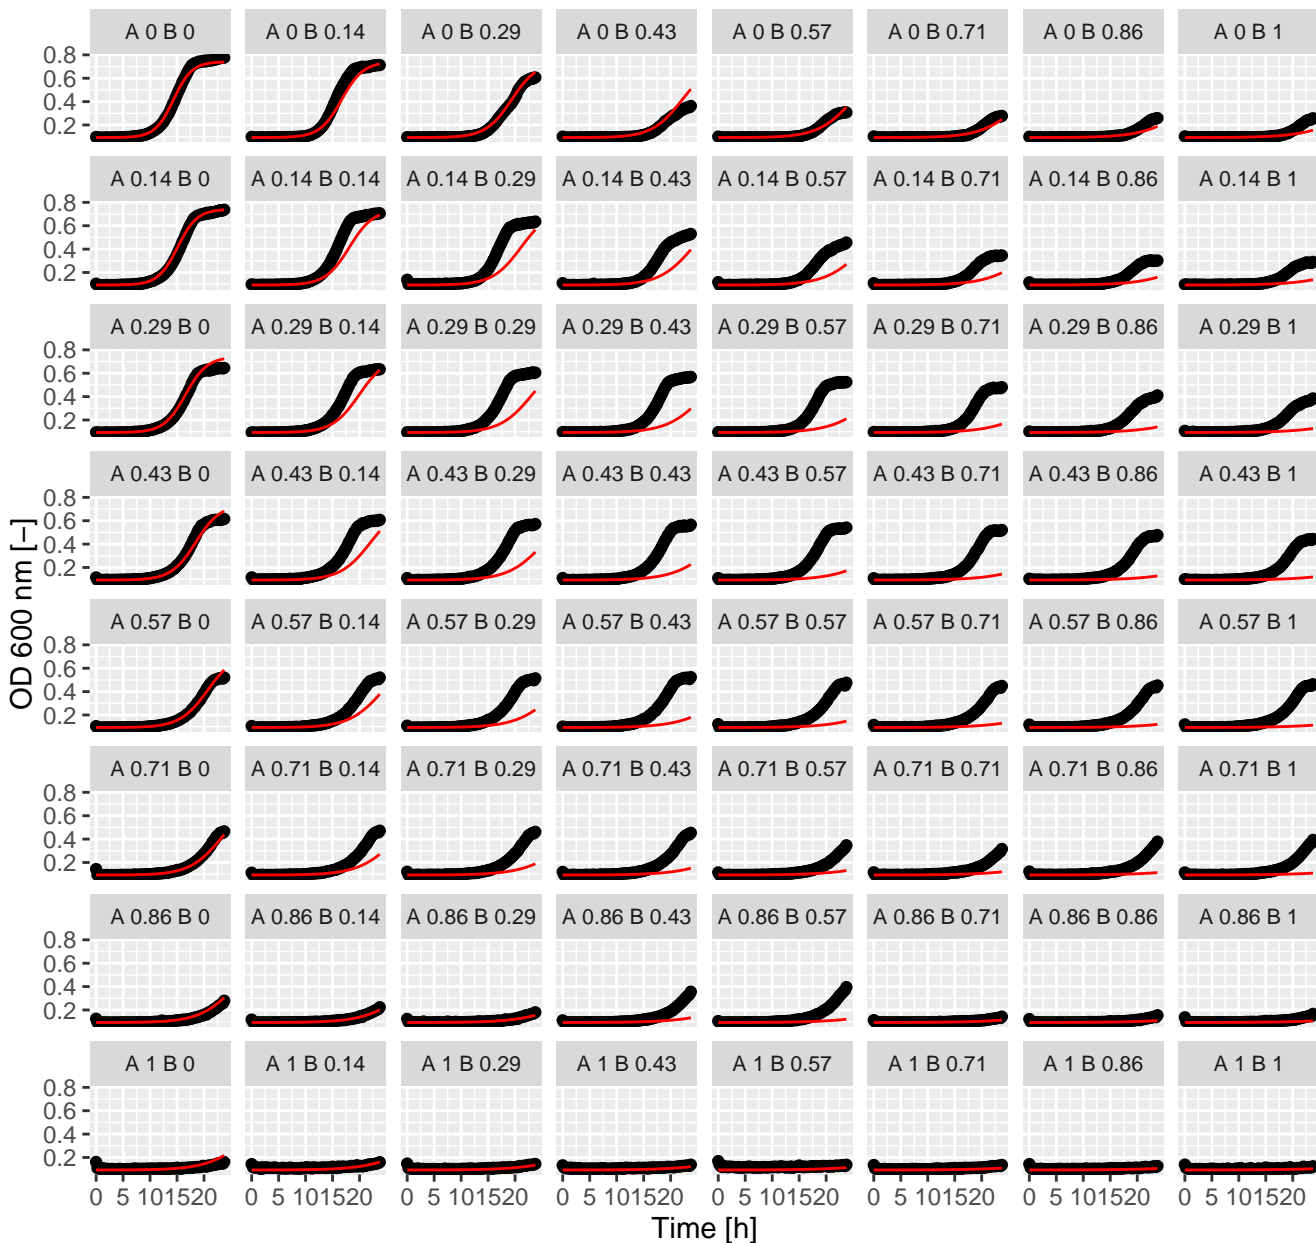

Chl.Ter (= Ax.Bx) full GPDI  
Int\_AB = 0.11 and Int\_BA = 7.47 at EC50

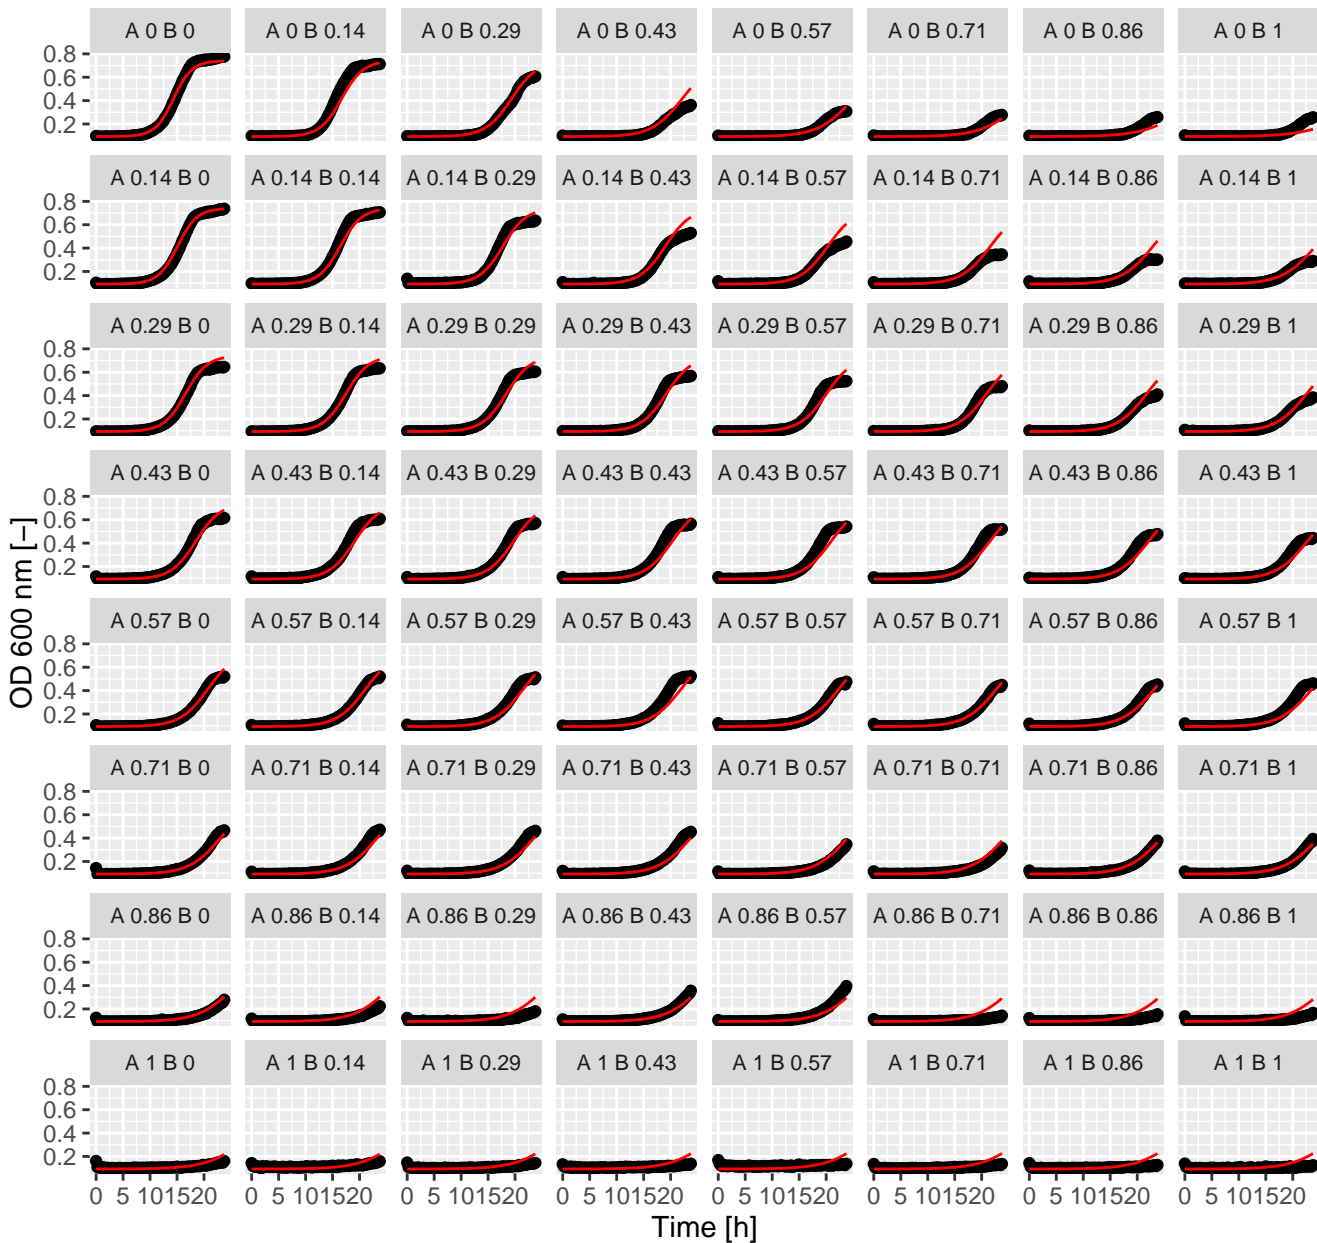

Cis.Cis (= Ax.Bx) exp. additivity (LA)  
Int\_AB = 0 and Int\_BA = 0 at EC50

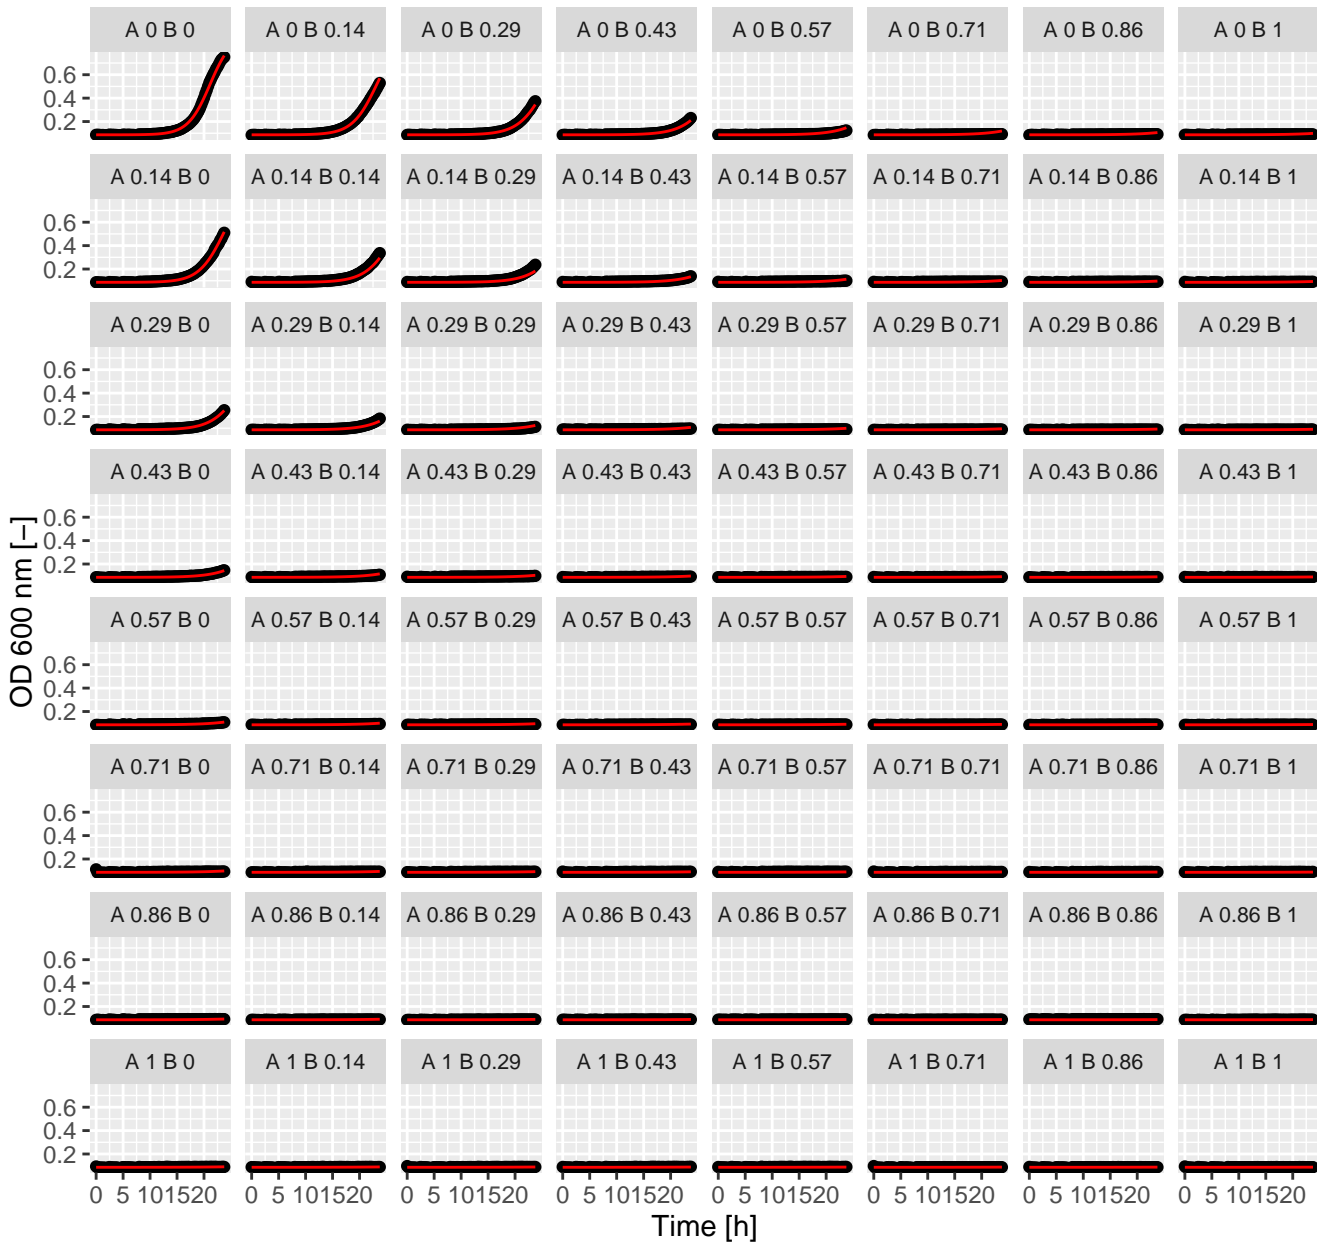

Cis.Cis (= Ax.Bx) full GPDI  
Int\_AB = 0.06 and Int\_BA = 0.12 at EC50

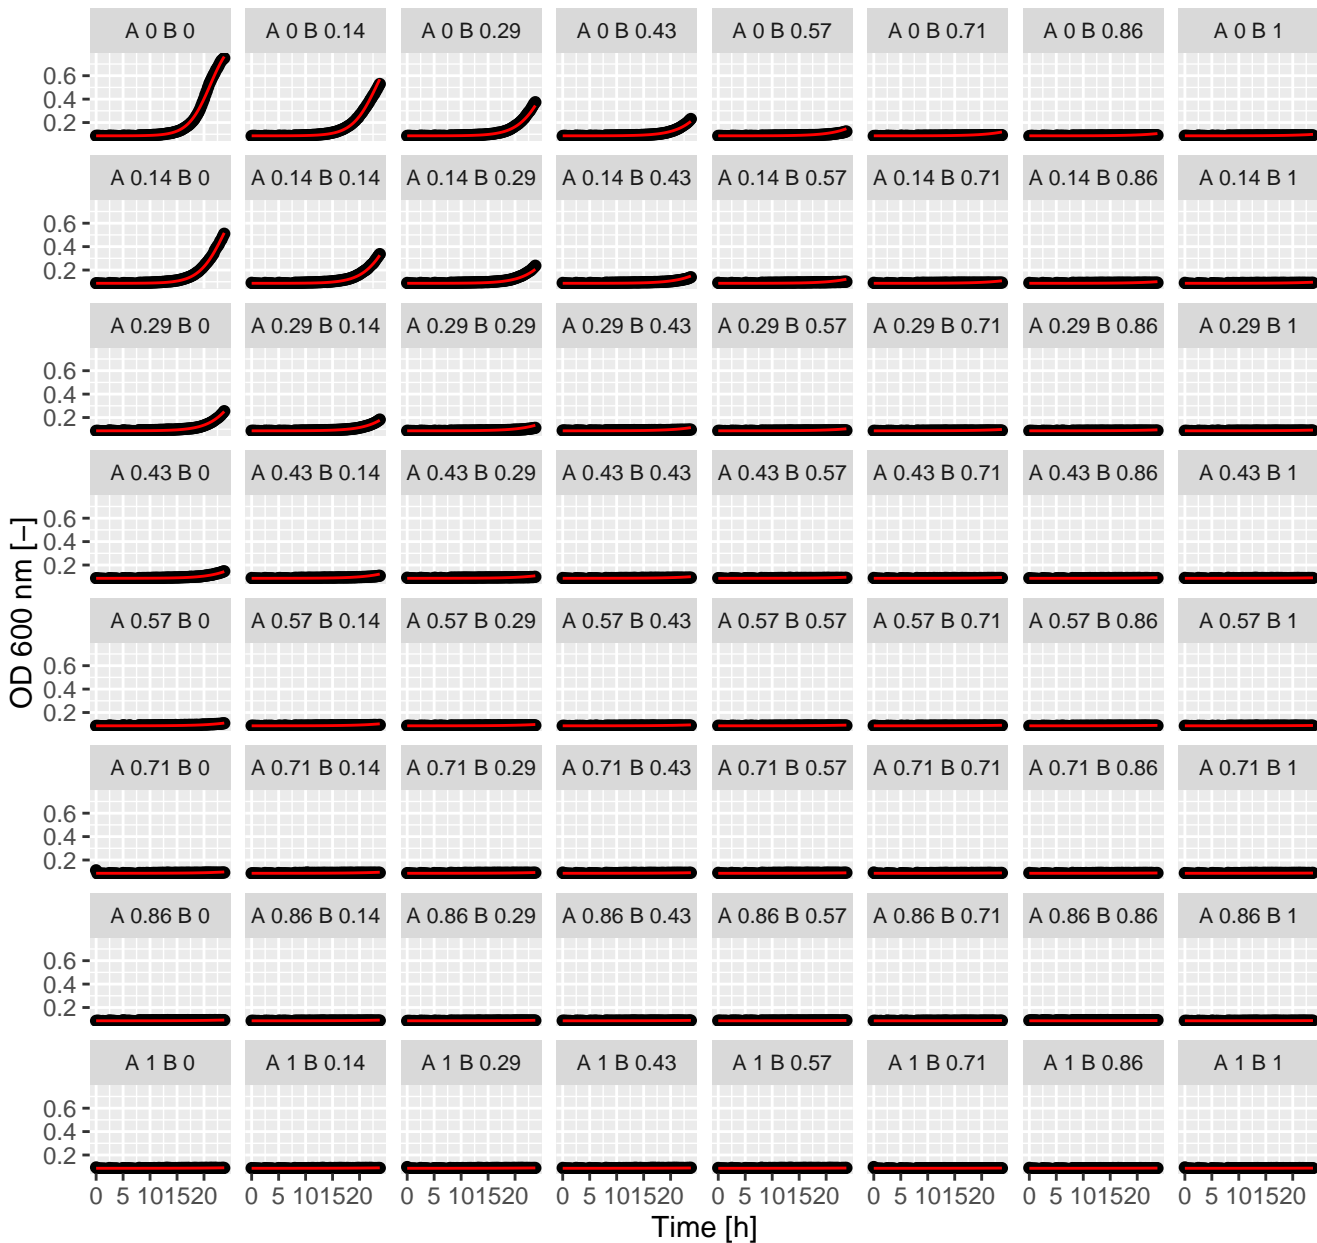

Cis.Lat (= Ax.Bx) exp. additivity (LA)  
Int\_AB = 0 and Int\_BA = 0 at EC50

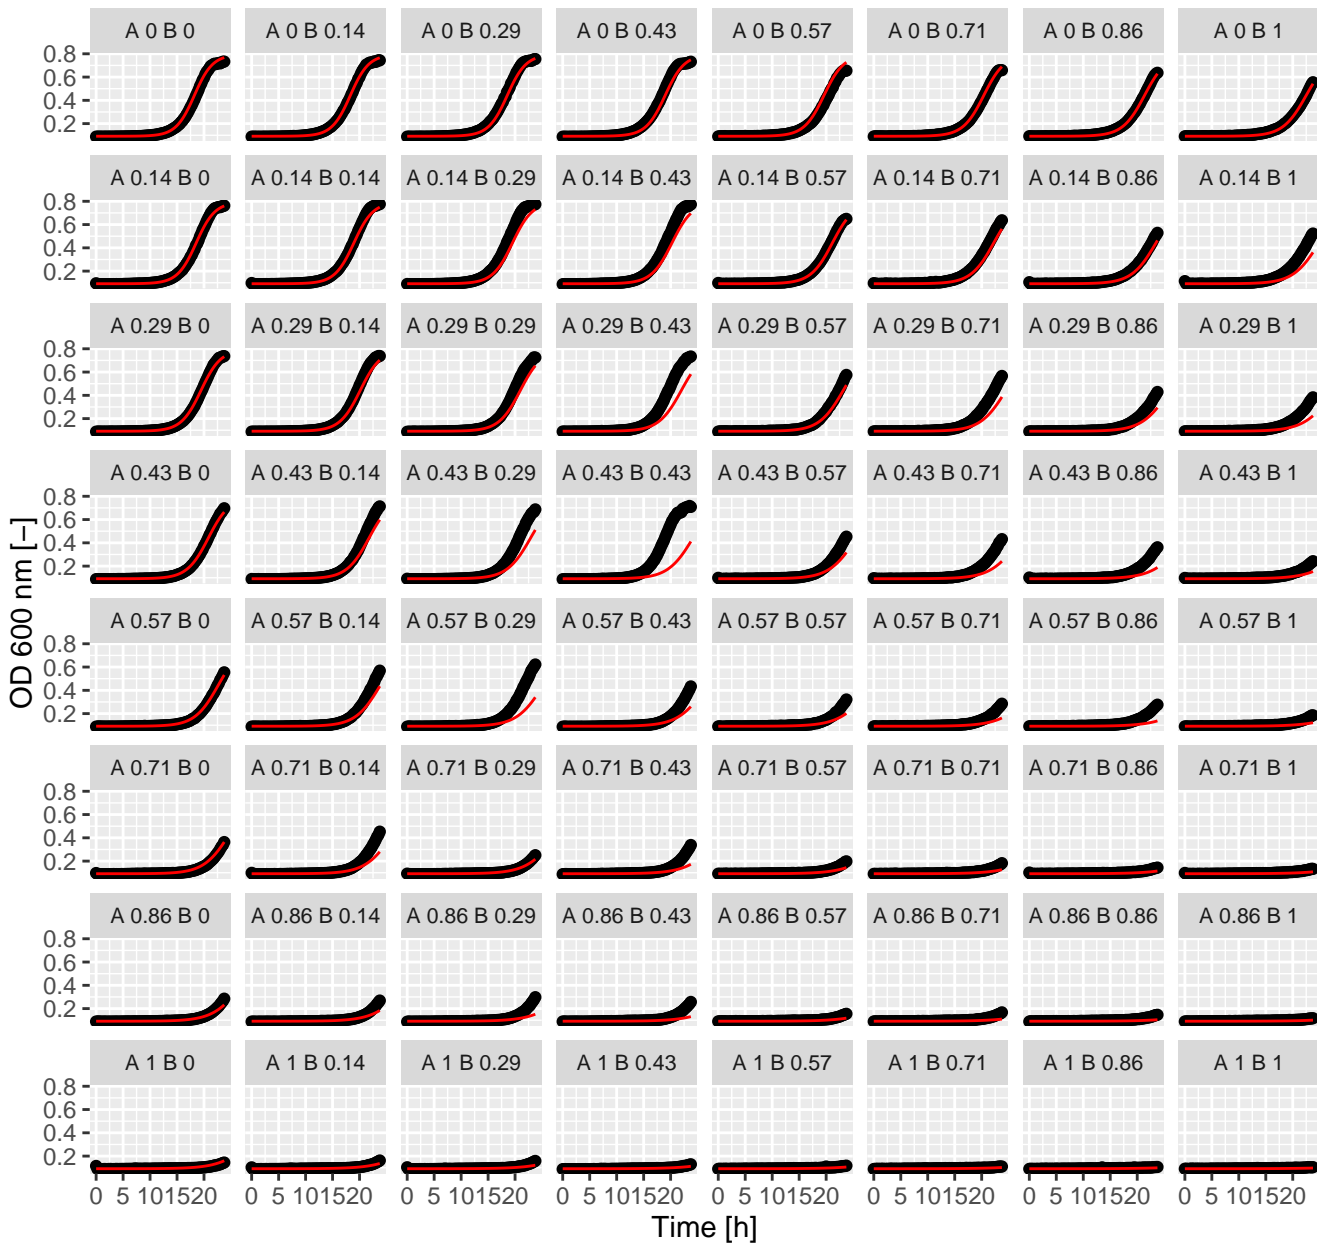

Cis.Lat (= Ax.Bx) full GPDI  
Int\_AB = 0.37 and Int\_BA = 0.21 at EC50

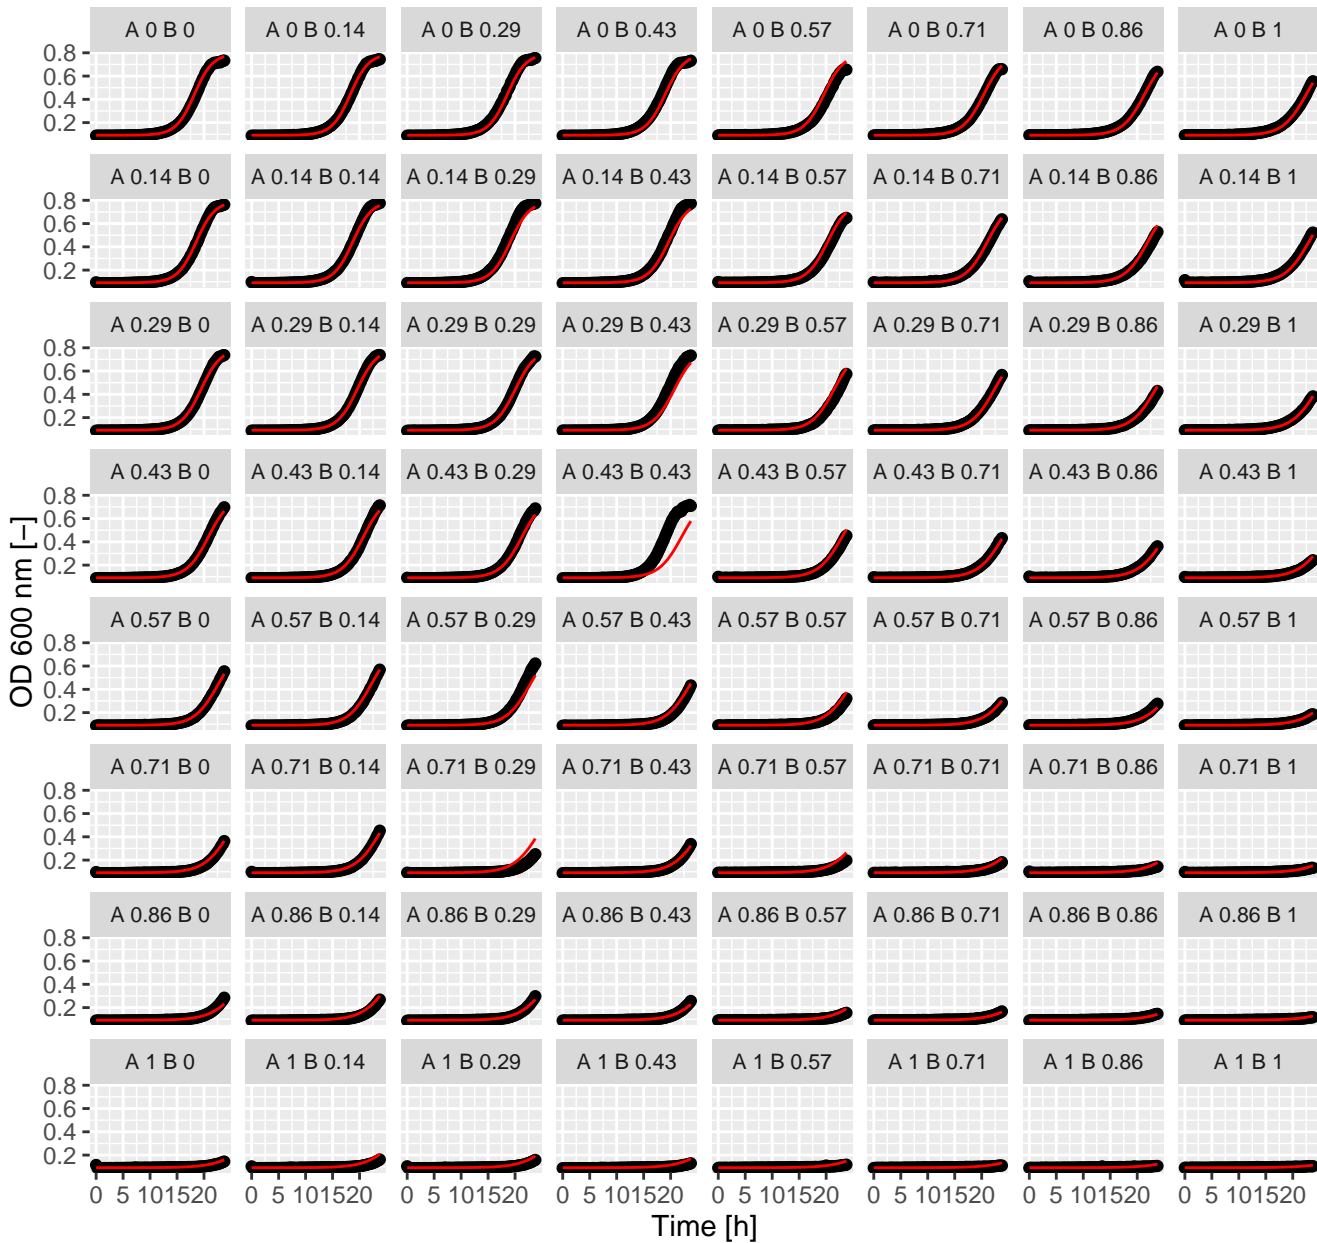



Cis.Sta (= Ax.Bx) exp. additivity (LA)  
Int\_AB = 0 and Int\_BA = 0 at EC50

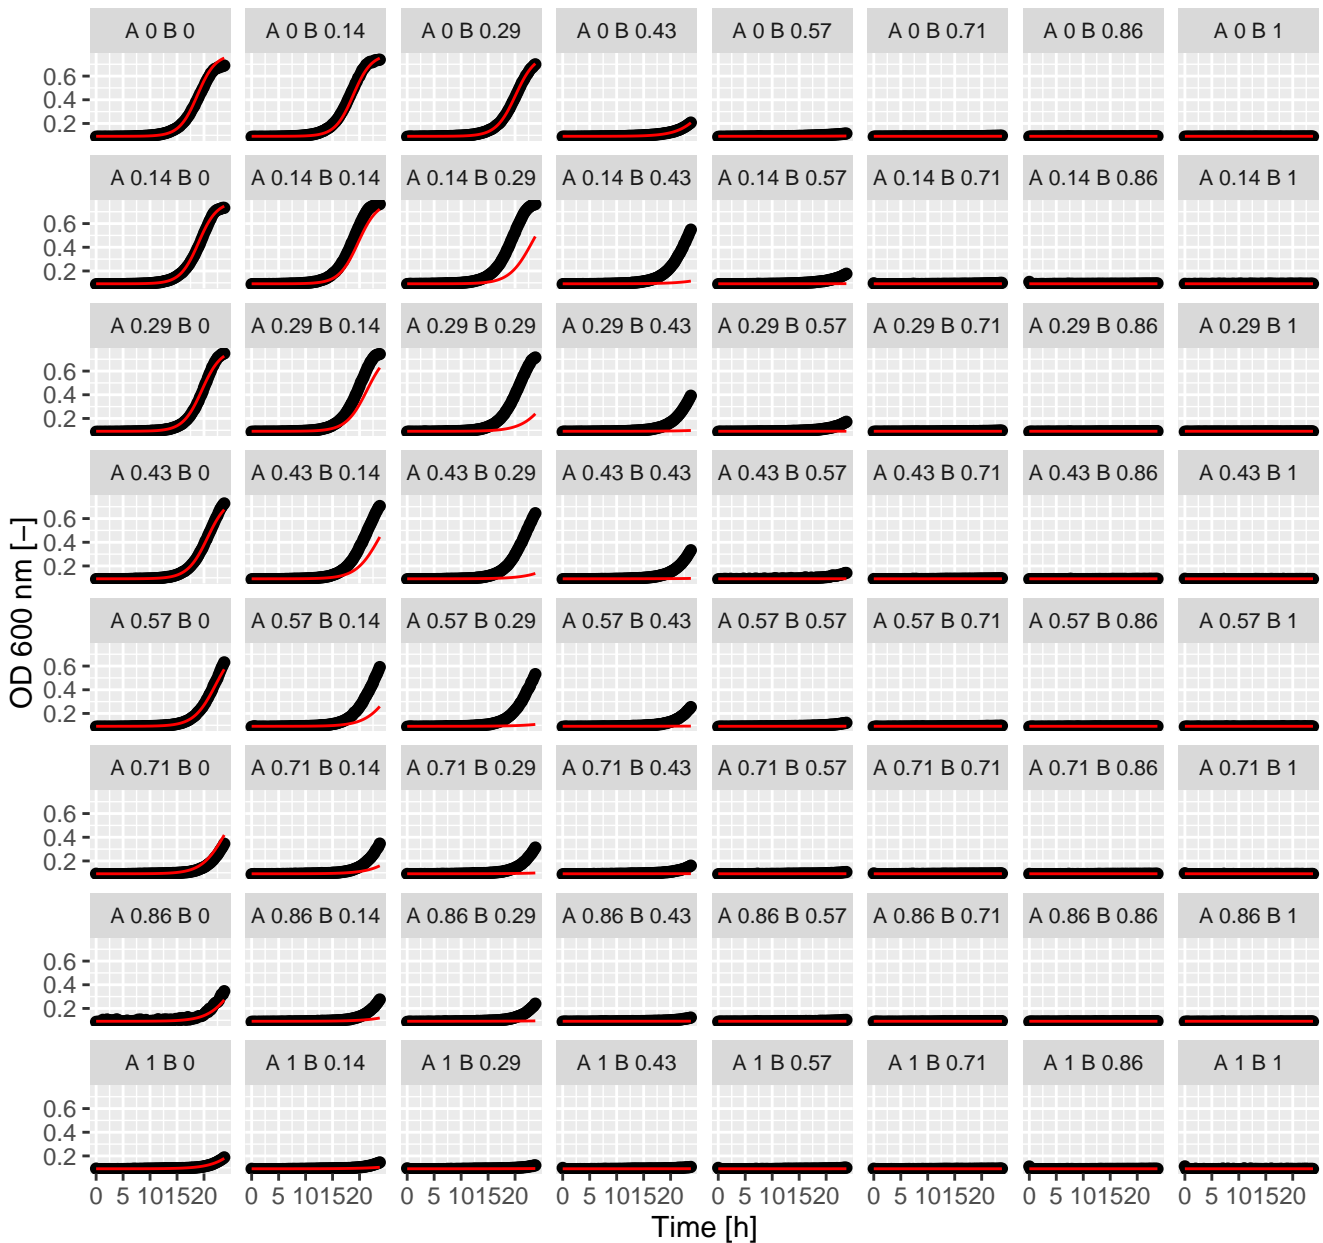

Cis.Sta (= Ax.Bx) full GPDI  
 Int\_AB = 1.15 and Int\_BA = 0.49 at EC50

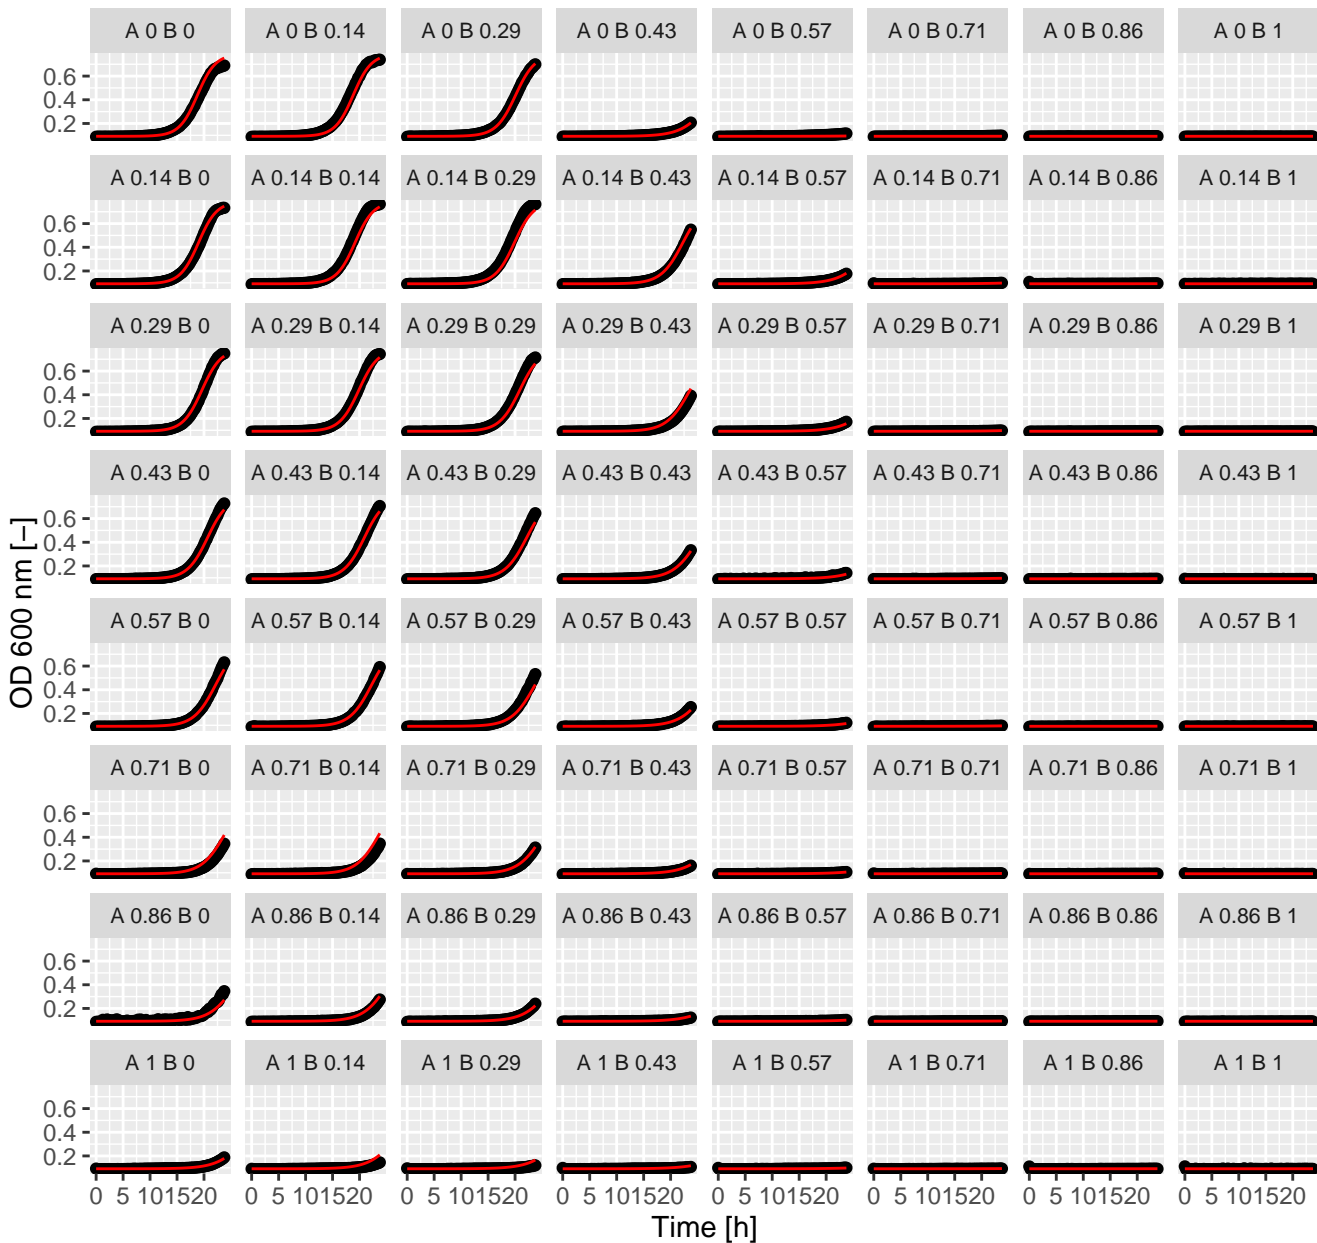

Cis.Tac (= Ax.Bx) exp. additivity (LA)  
Int\_AB = 0 and Int\_BA = 0 at EC50

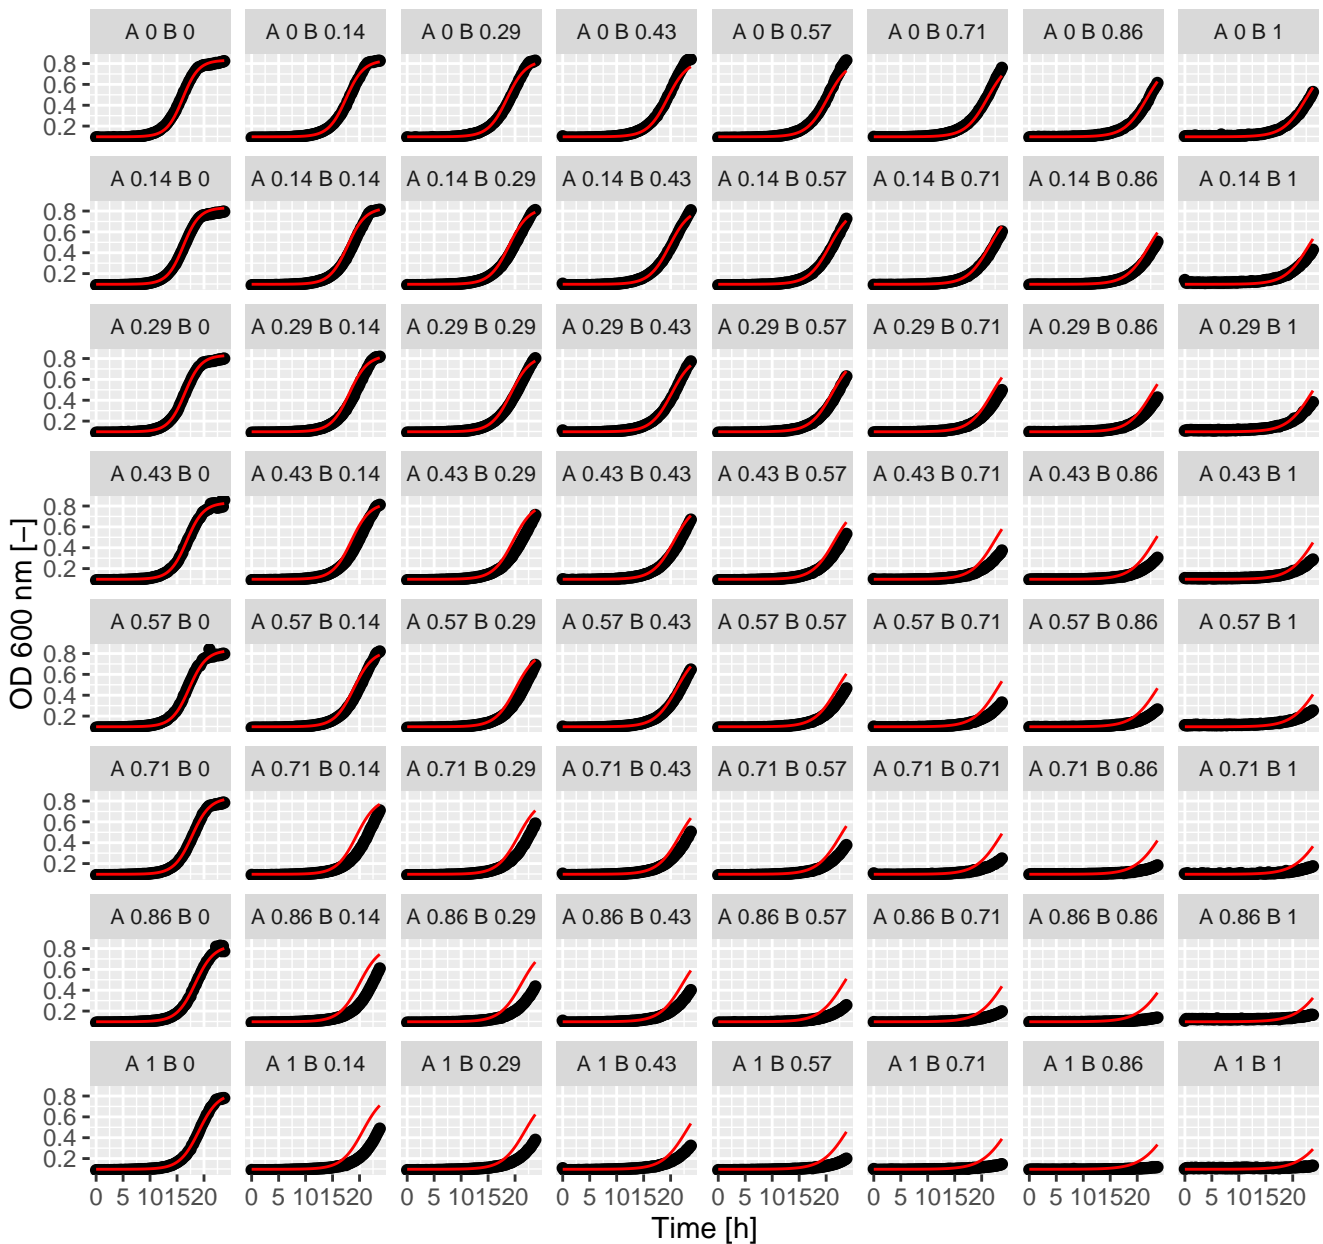

Cis.Tac (= Ax.Bx) full GPDI  
Int\_AB = -0.29 and Int\_BA = -0.49 at EC50

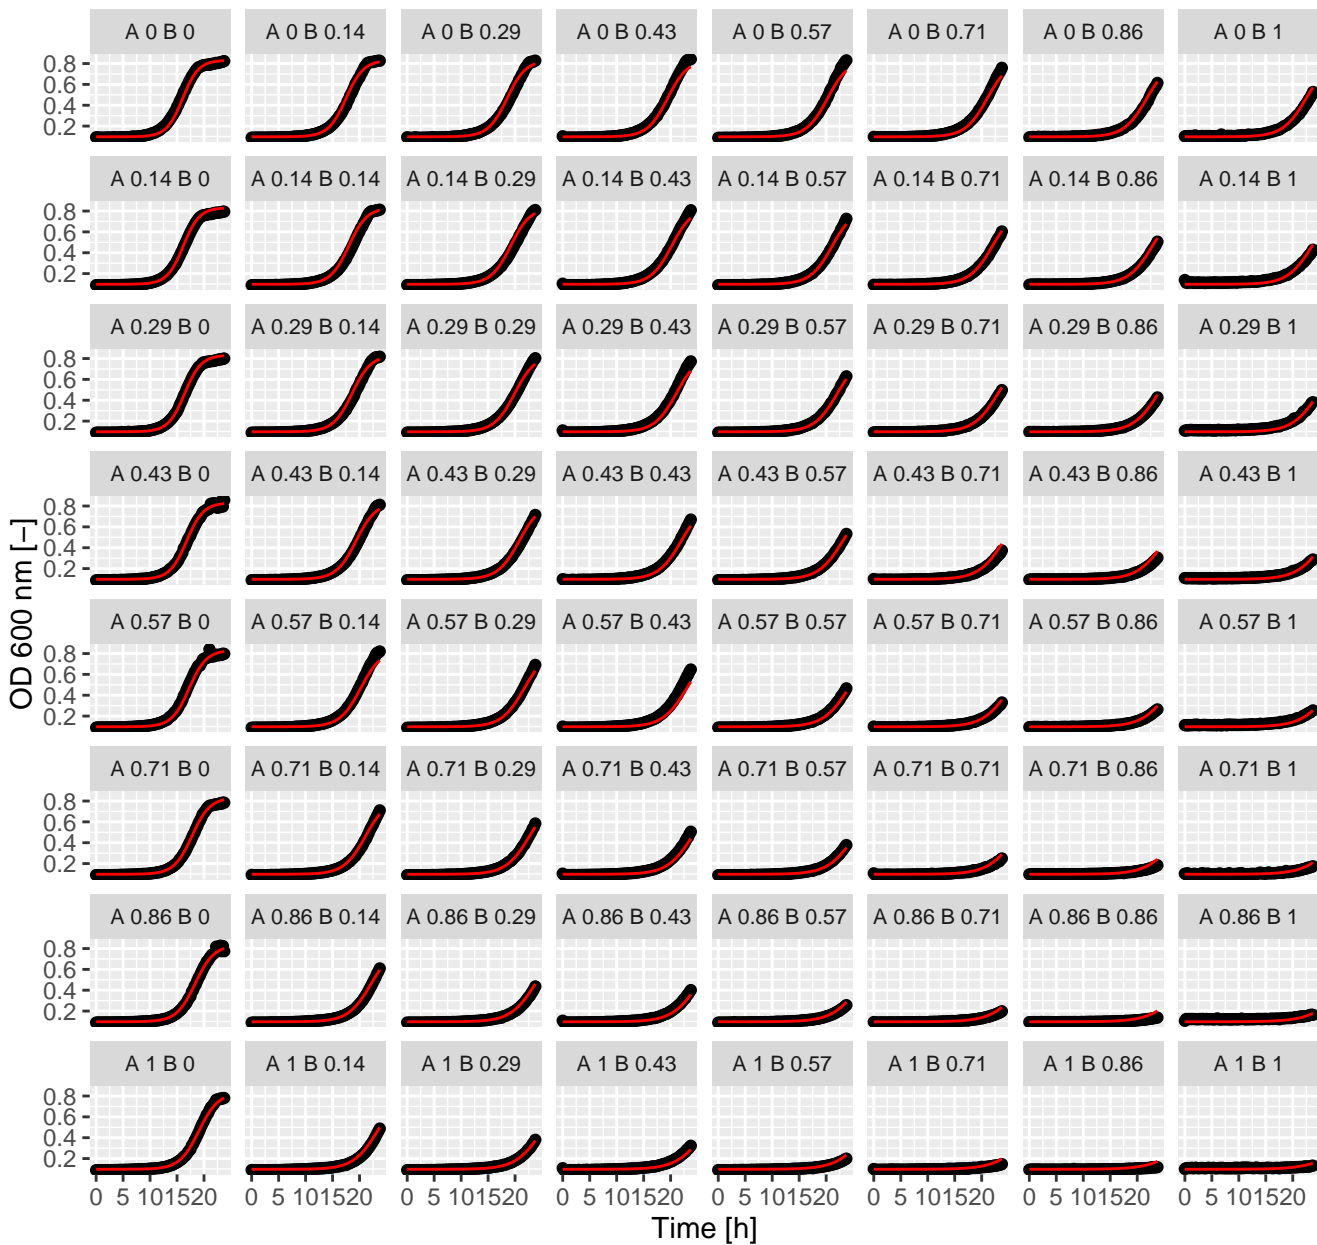

Cis.Ter (= Ax.Bx) exp. additivity (LA)  
Int\_AB = 0 and Int\_BA = 0 at EC50

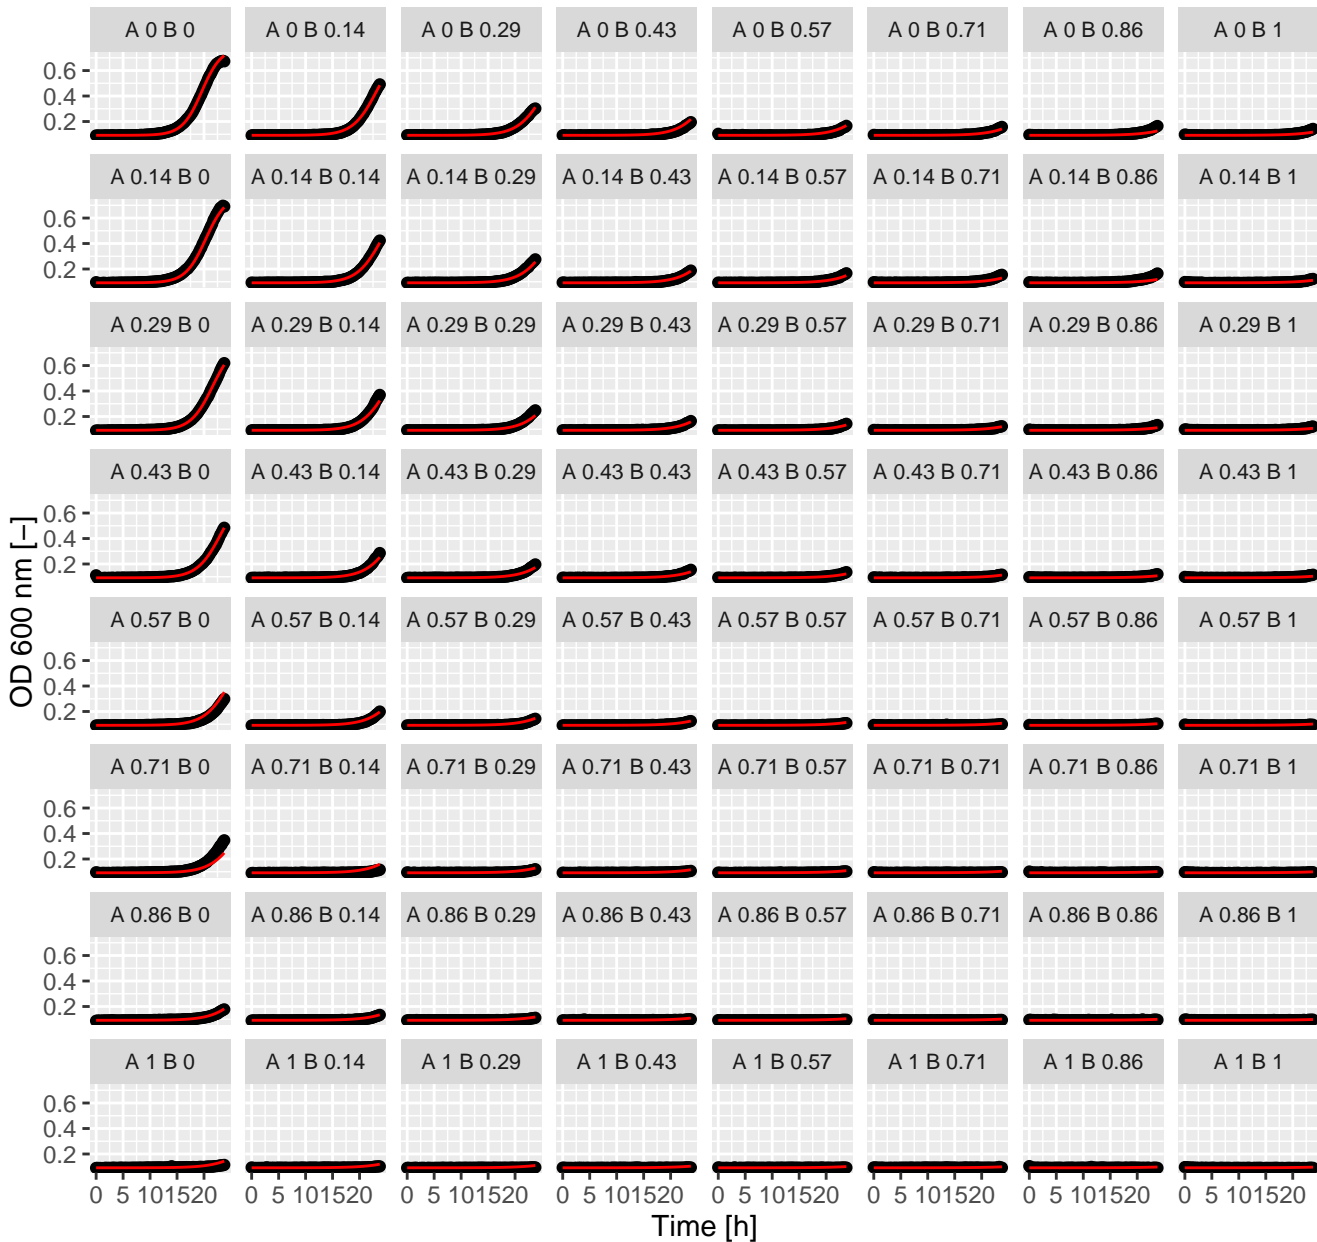

Cis.Ter (= Ax.Bx) full GPD1  
Int\_AB = -0.51 and Int\_BA = 2.76 at EC50

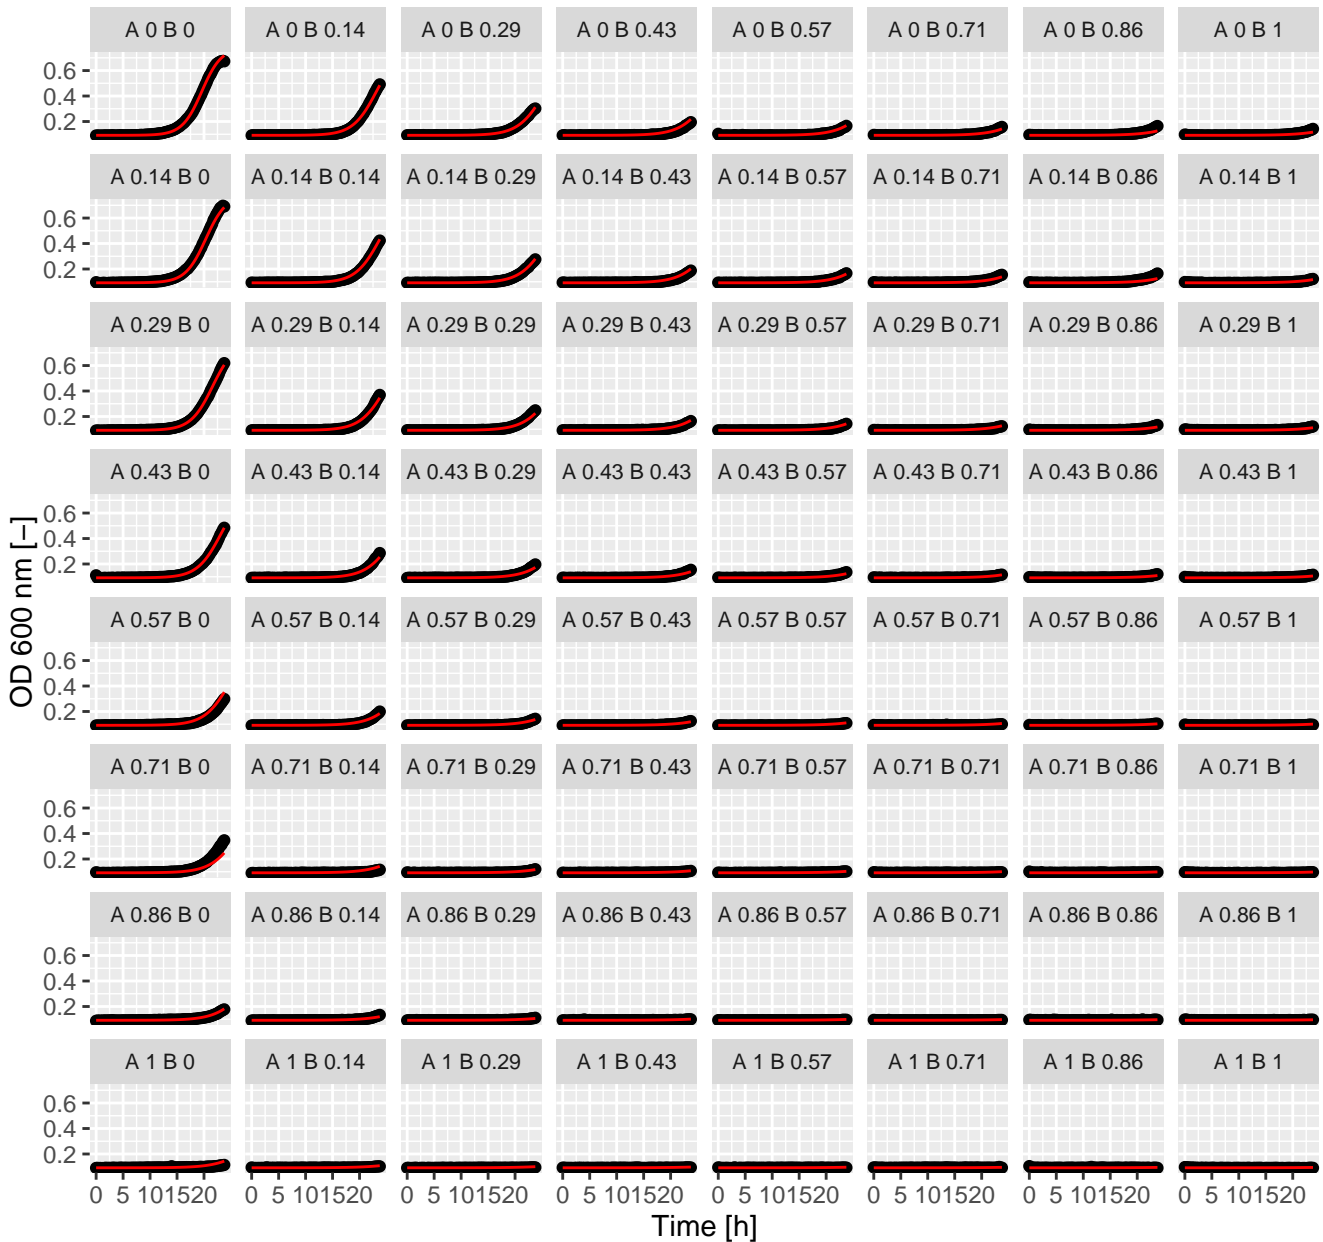

Clo.Rad (= Ax.Bx) exp. additivity (LA)  
Int\_AB = 0 and Int\_BA = 0 at EC50

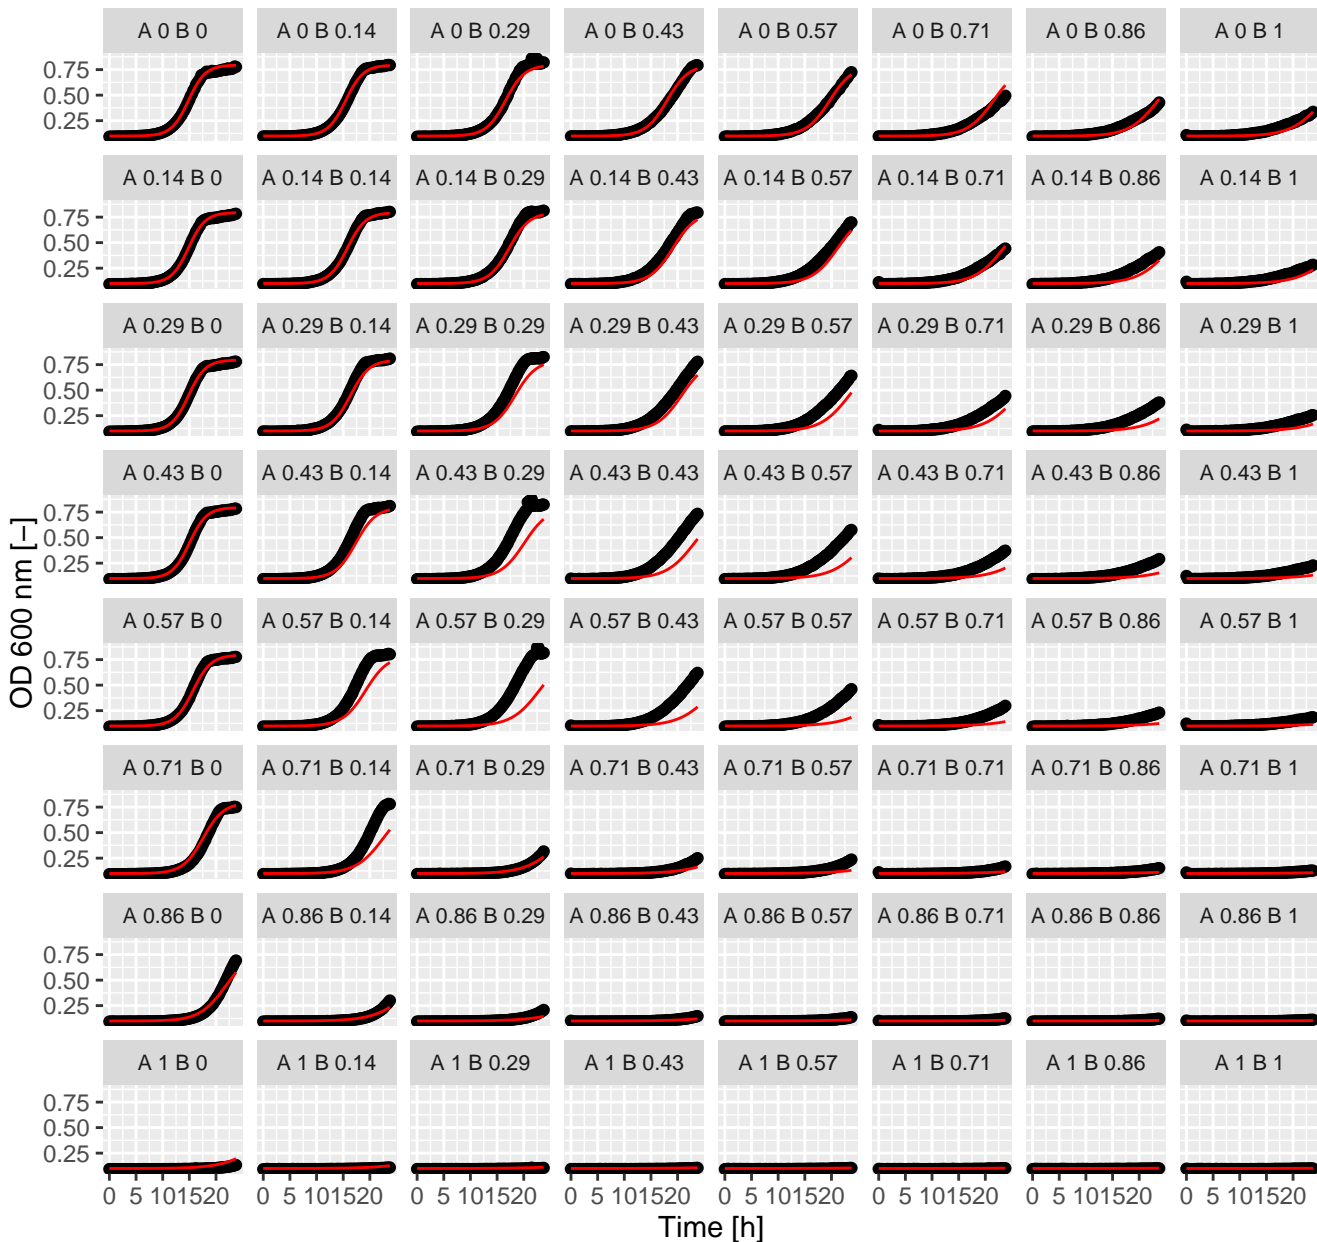

Clo.Rad (= Ax.Bx) full GPD1  
Int\_AB = -0.15 and Int\_BA = 1.75 at EC50

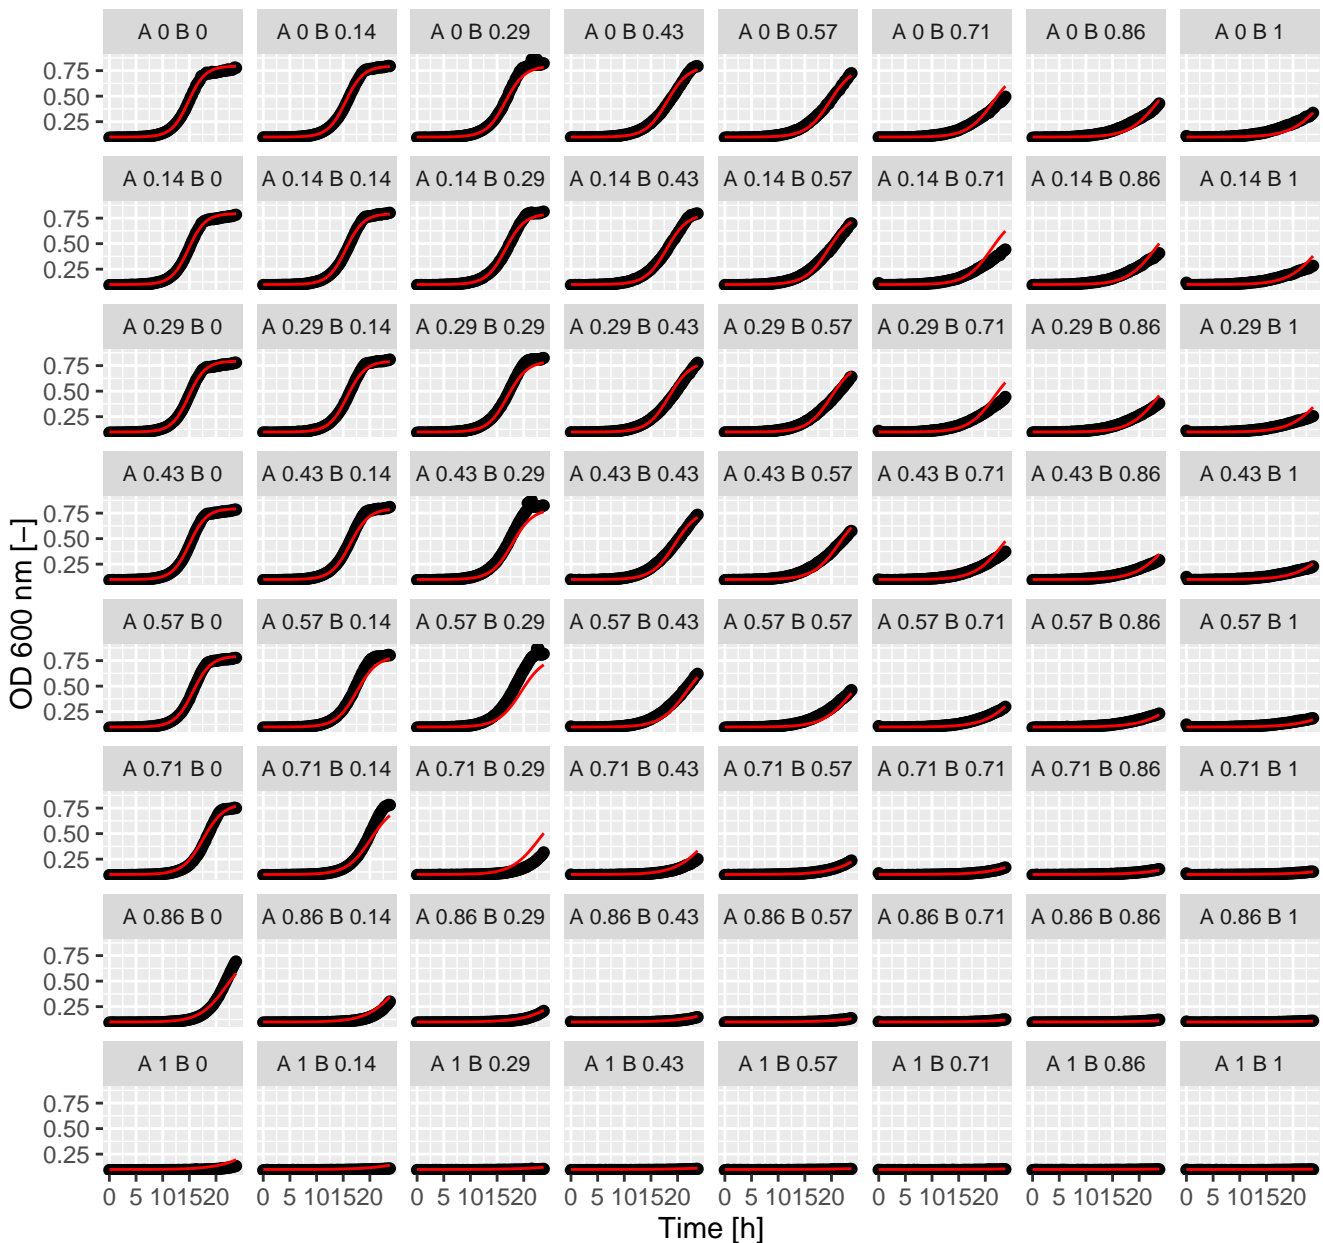



Cyc.Cyc (= Ax.Bx) exp. additivity (LA)  
Int\_AB = 0 and Int\_BA = 0 at EC50

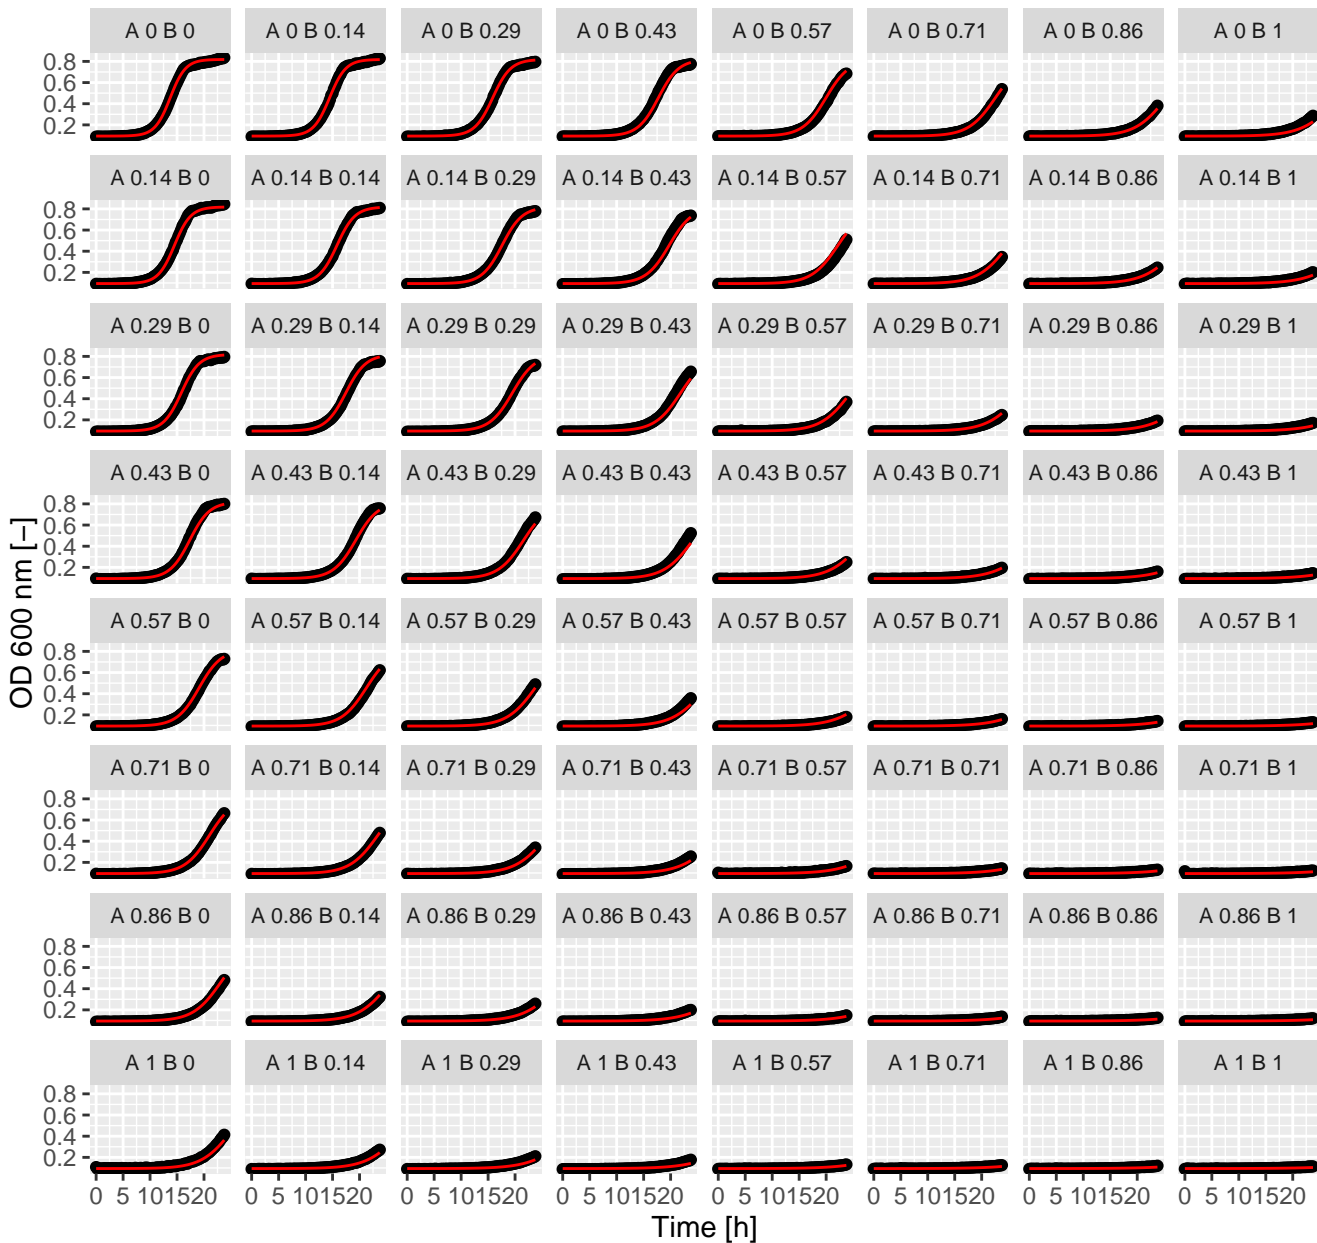

Cyc.Cyc (= Ax.Bx) full GPDI  
Int\_AB = 0.13 and Int\_BA = 0 at EC50

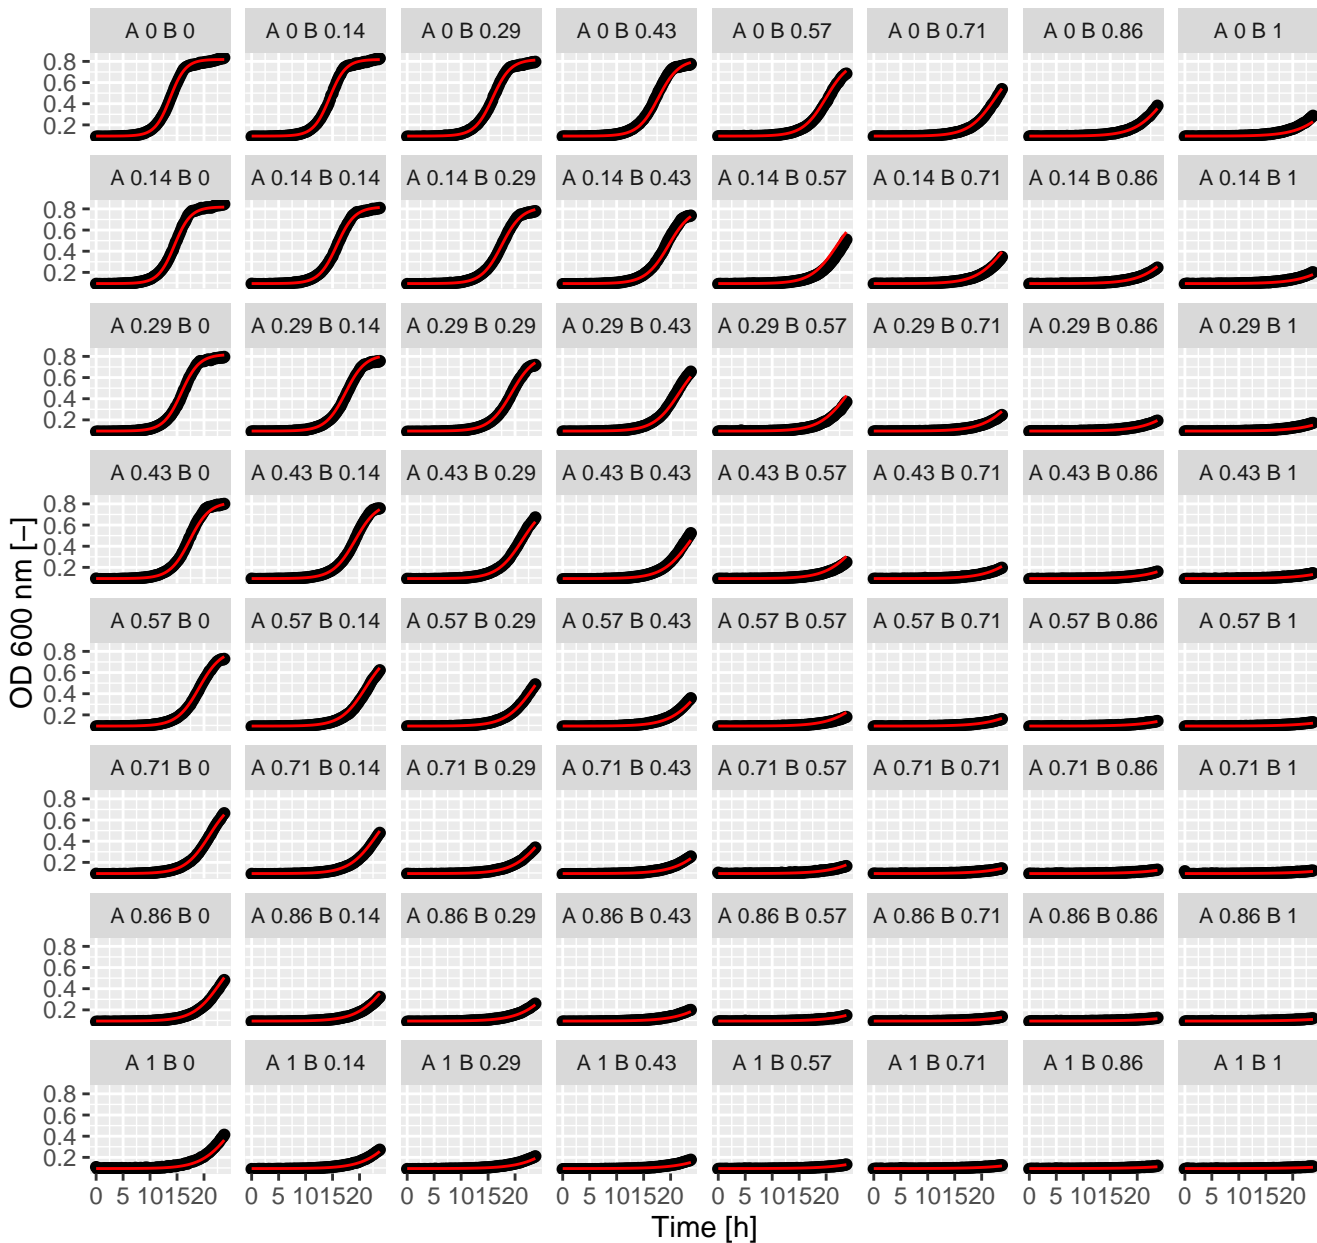

Cyc.Lat (= Ax.Bx) exp. additivity (LA)  
Int\_AB = 0 and Int\_BA = 0 at EC50

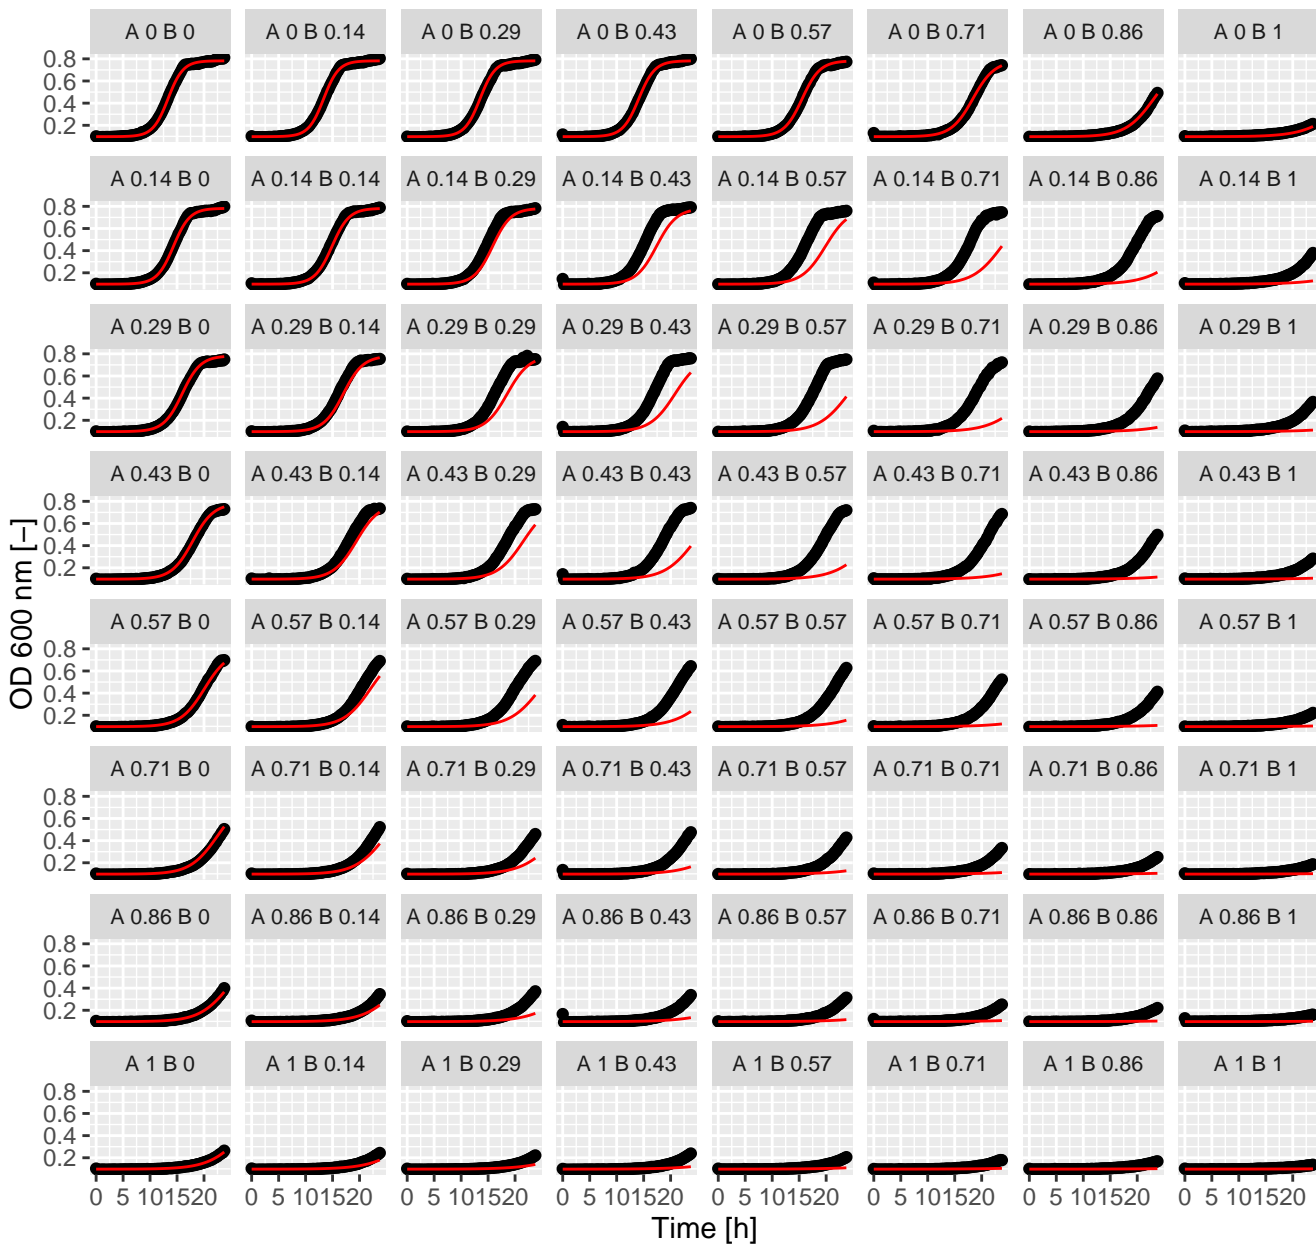

Cyc.Lat (= Ax.Bx) full GPDI  
Int\_AB = 1.02 and Int\_BA = 0.46 at EC50

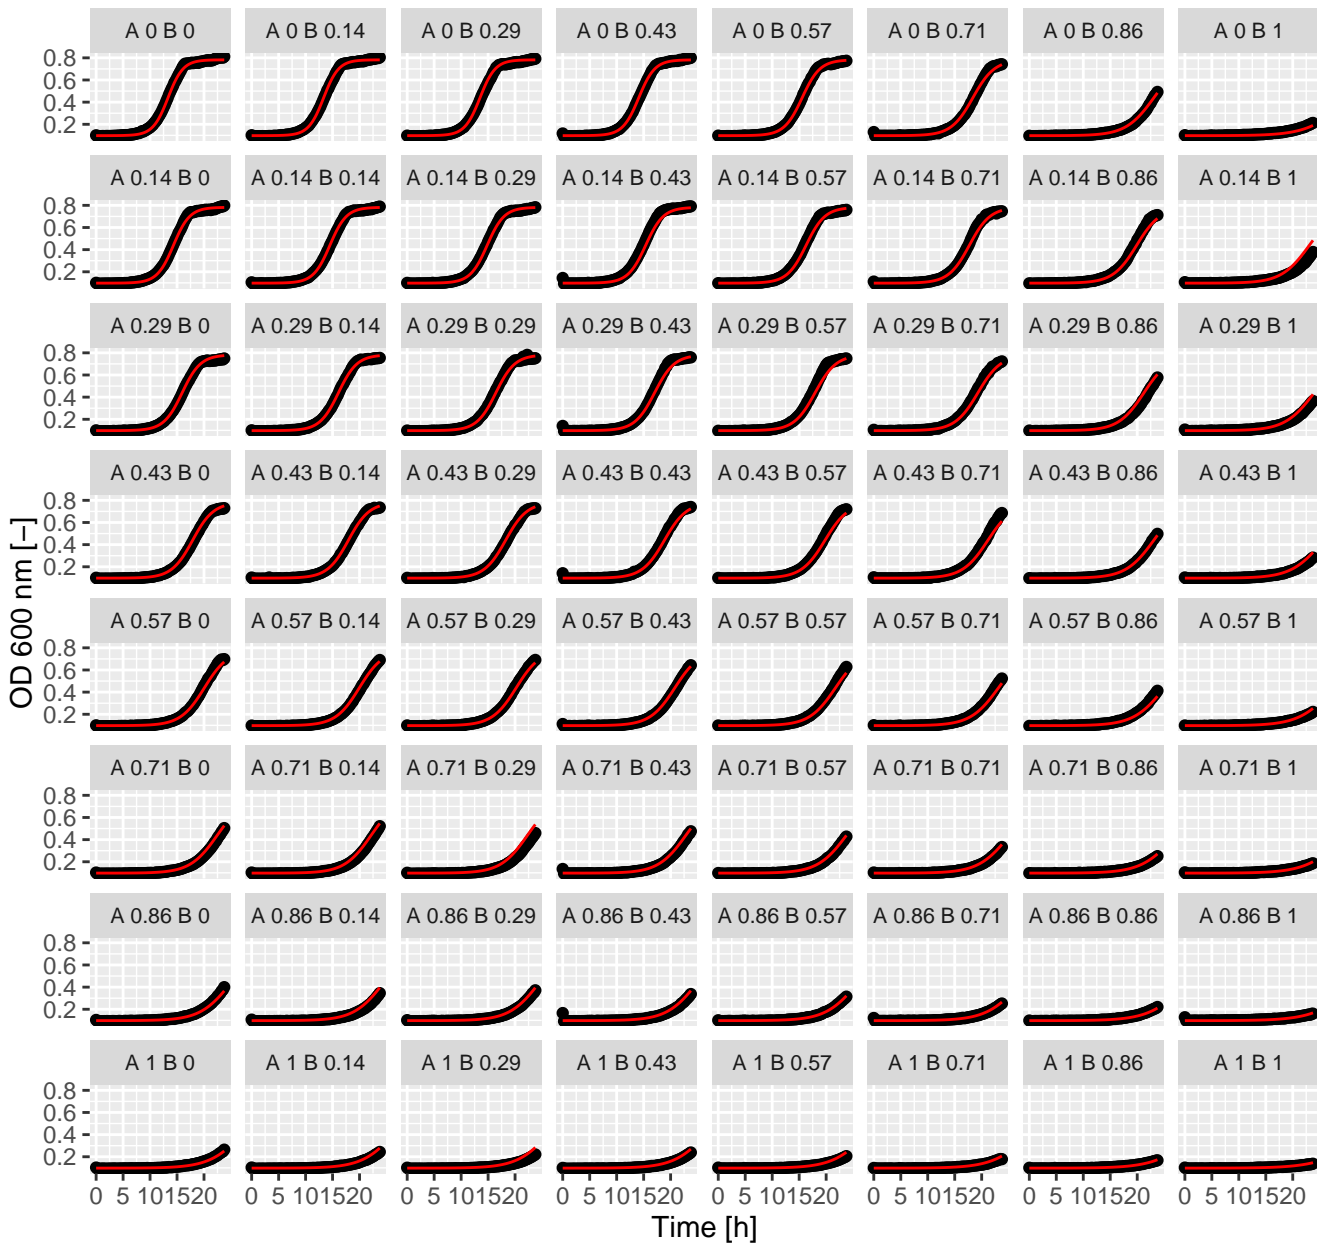

Cyc.Pen (= Ax.Bx) exp. additivity (LA)  
Int\_AB = 0 and Int\_BA = 0 at EC50

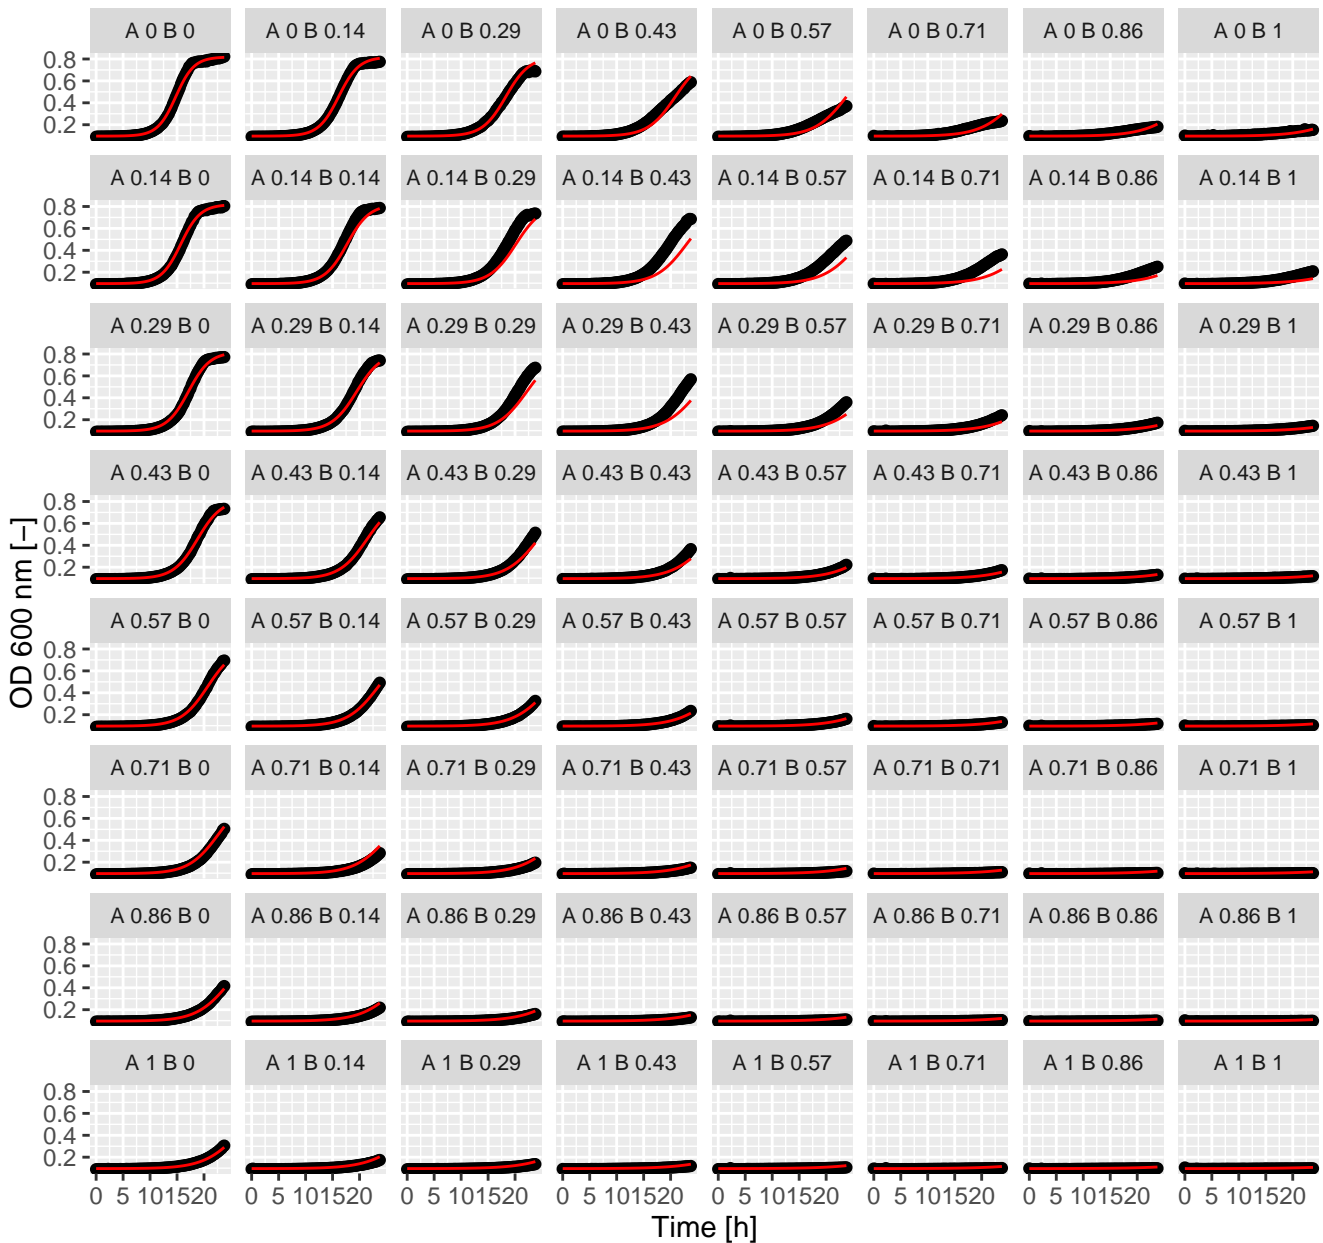

Cyc.Pen (= Ax.Bx) full GPDI  
Int\_AB = -0.41 and Int\_BA = 0.75 at EC50

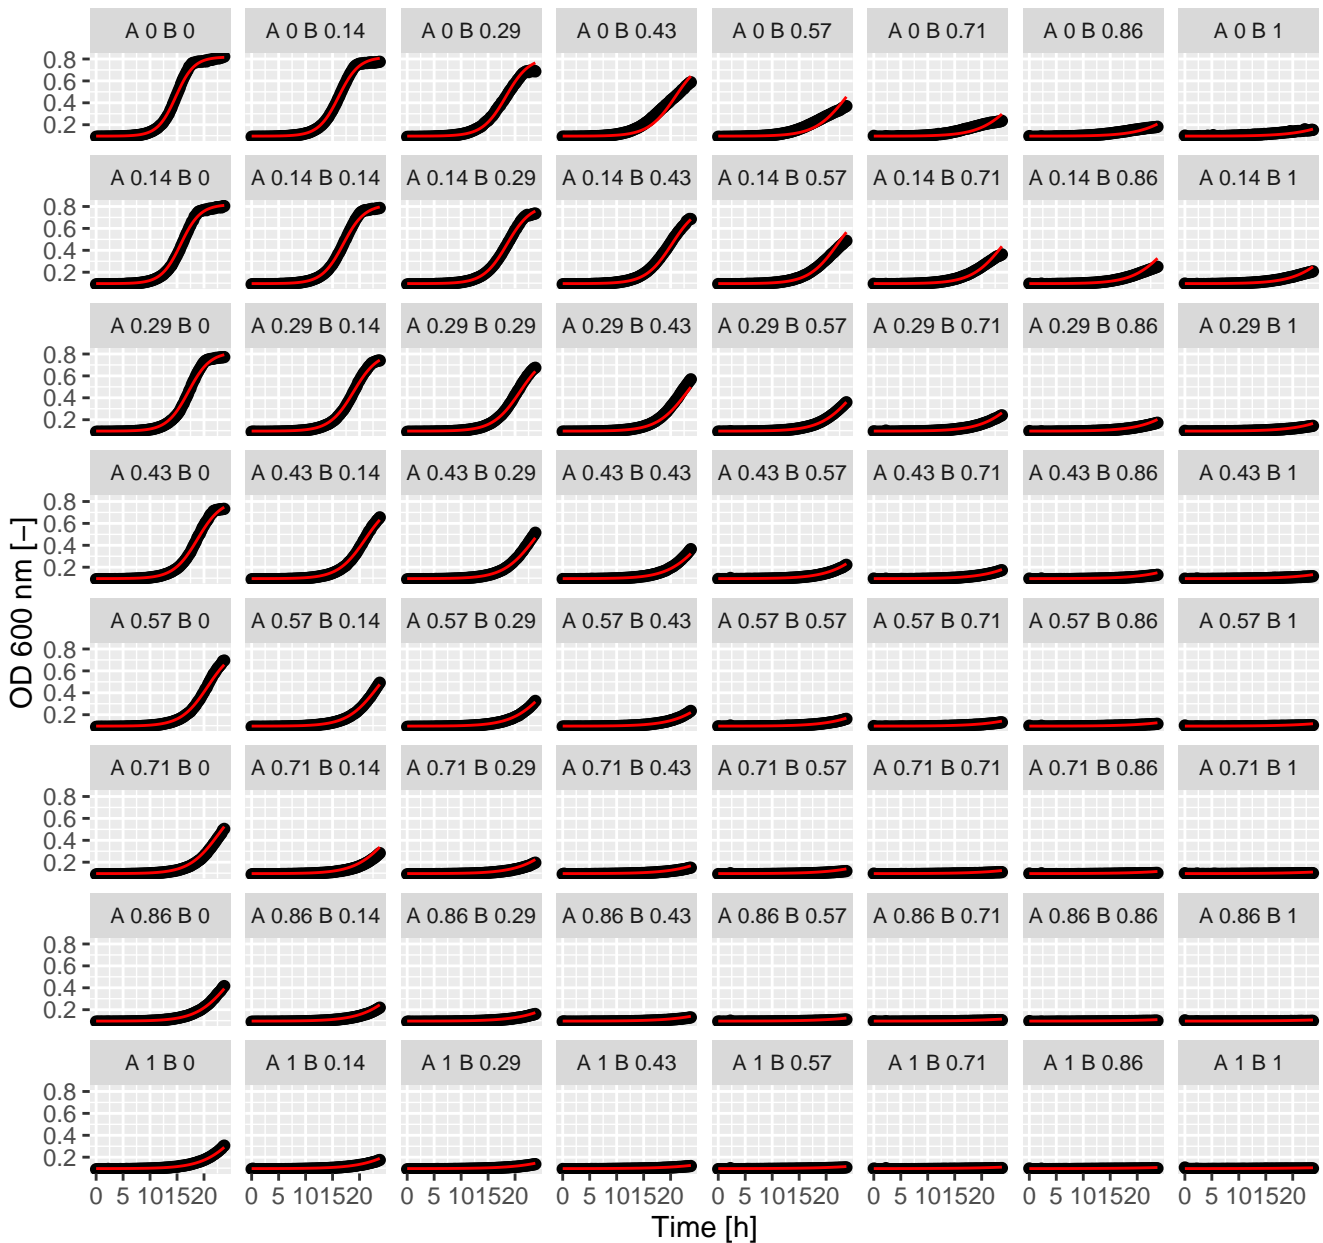

Cyc.Rad (= Ax.Bx) exp. additivity (LA)  
Int\_AB = 0 and Int\_BA = 0 at EC50

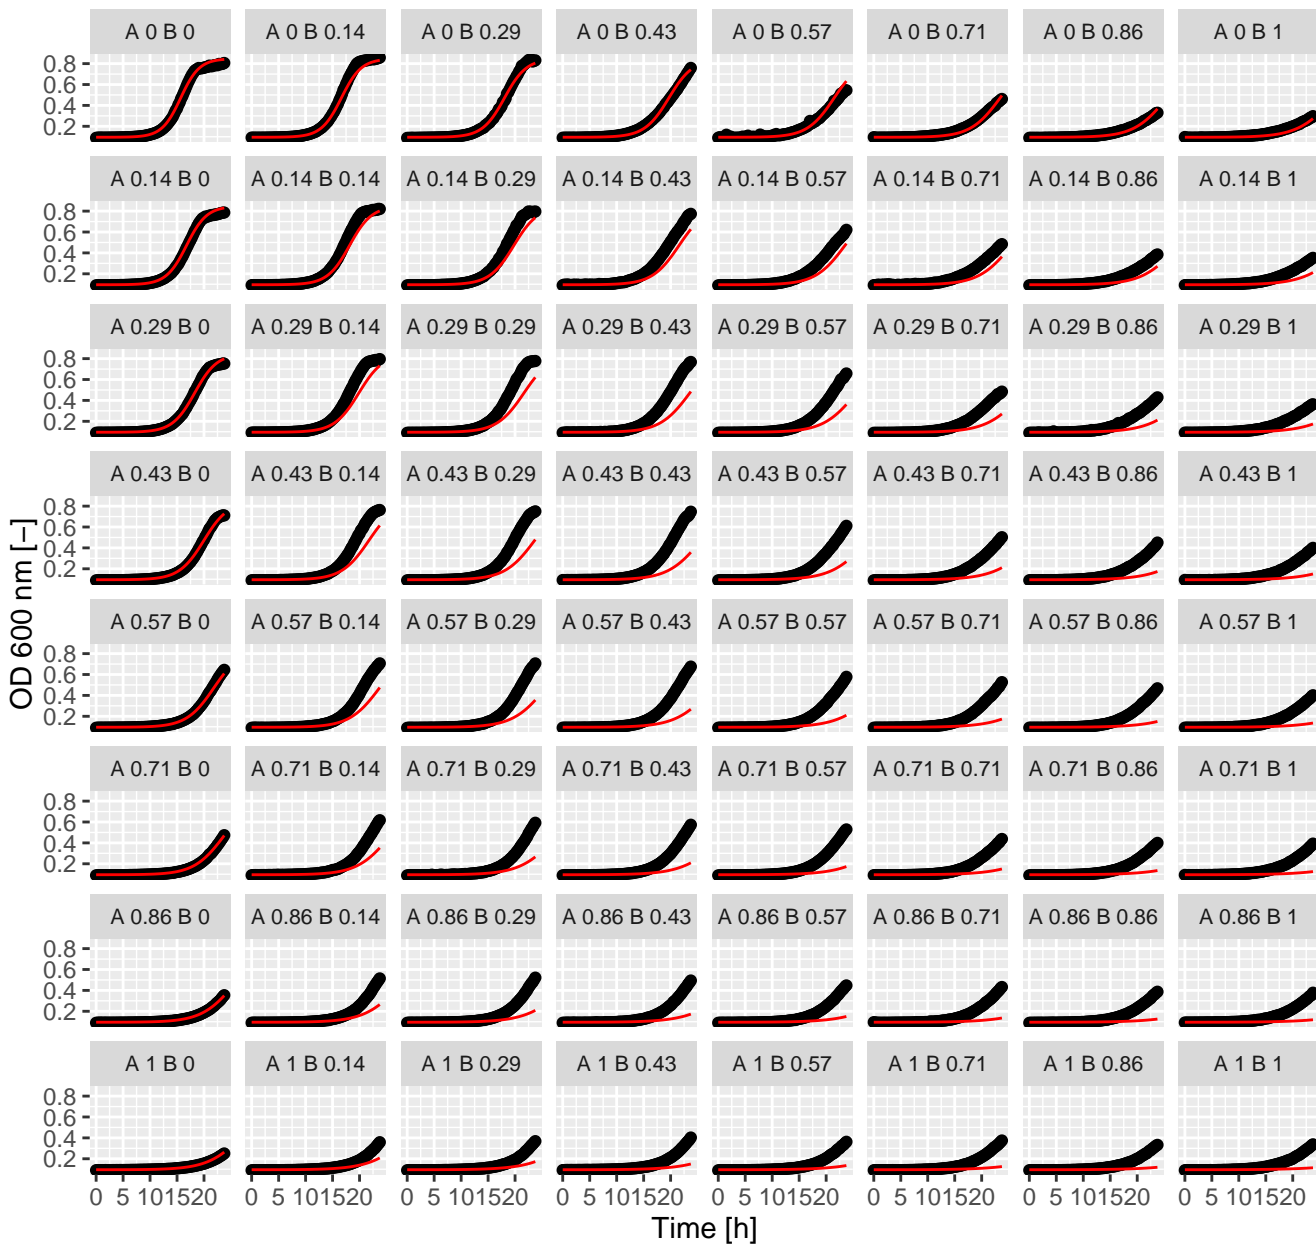

Cyc.Rad (= Ax.Bx) full GPDI  
Int\_AB = 0.8 and Int\_BA = 2.07 at EC50

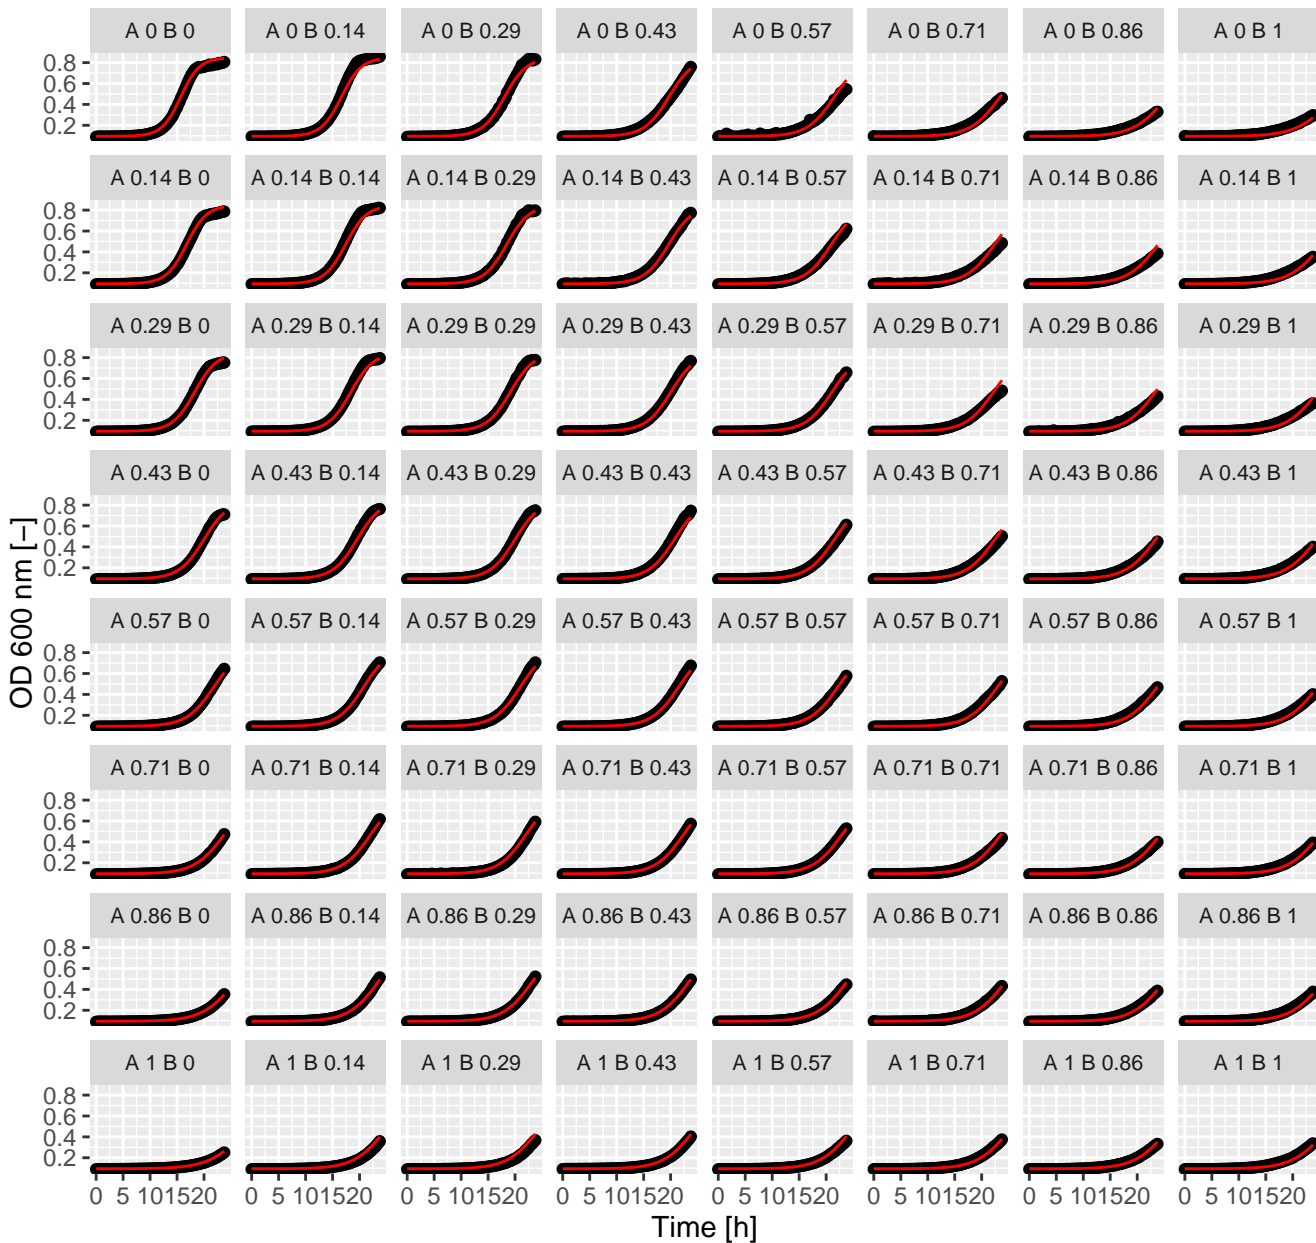



Cyc.Sta (= Ax.Bx) exp. additivity (LA)  
Int\_AB = 0 and Int\_BA = 0 at EC50

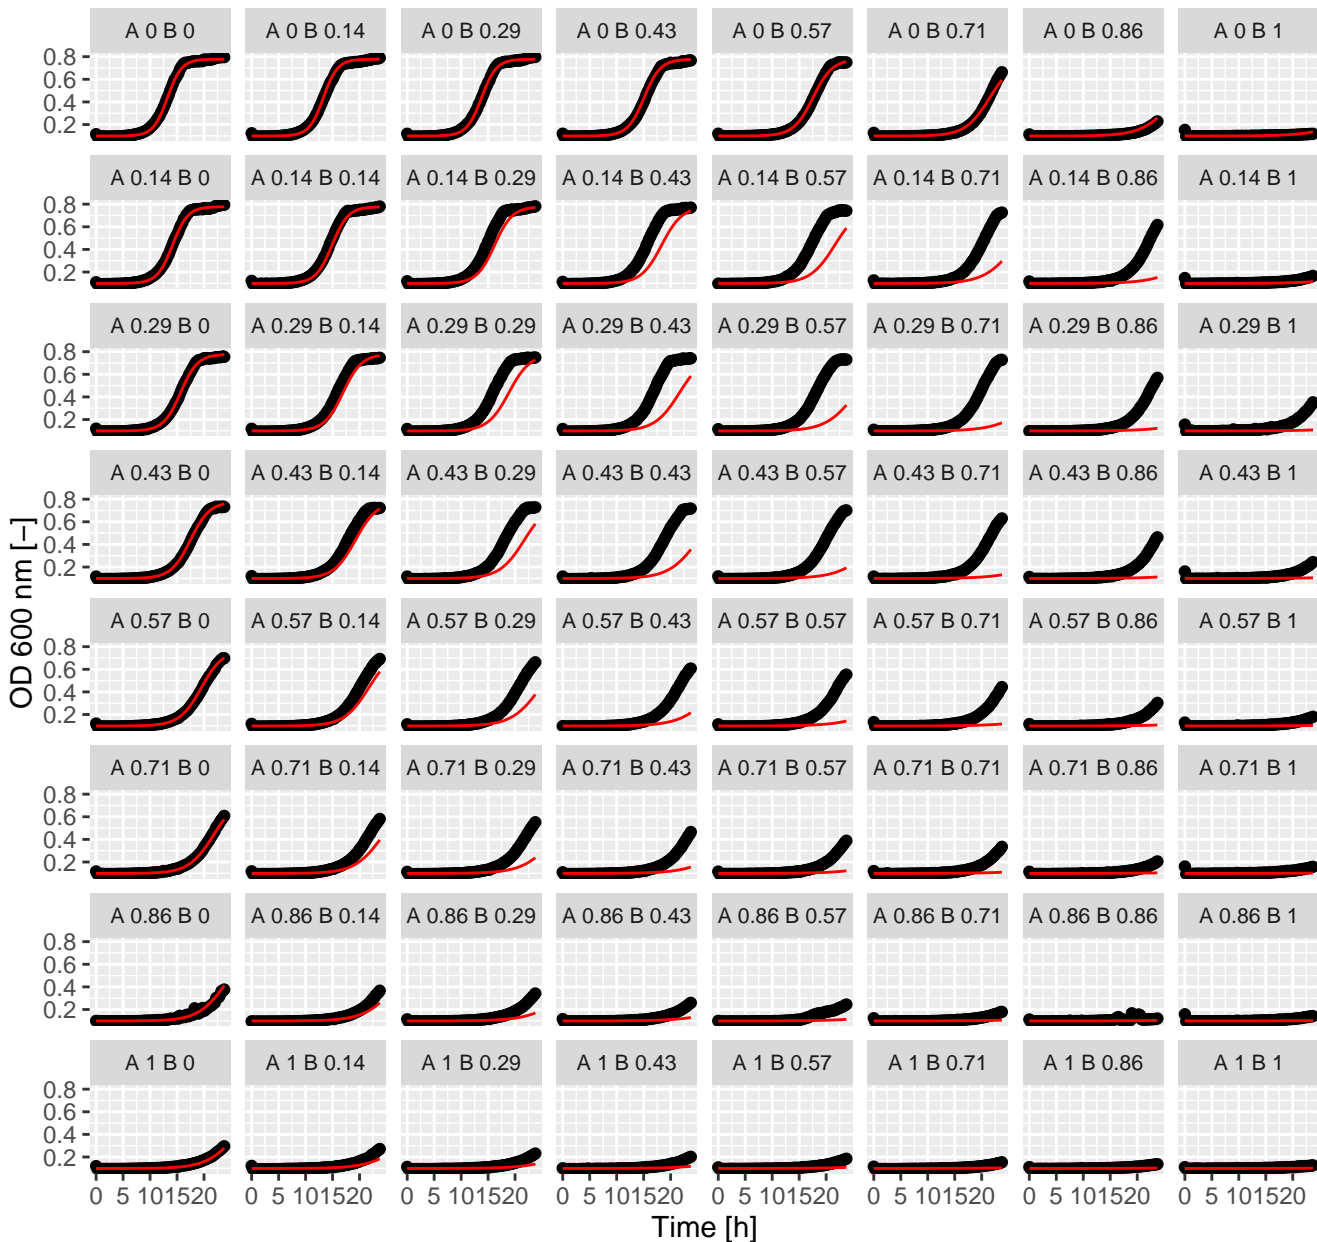

Cyc.Sta (= Ax.Bx) full GPDI  
Int\_AB = 0.55 and Int\_BA = 0.76 at EC50

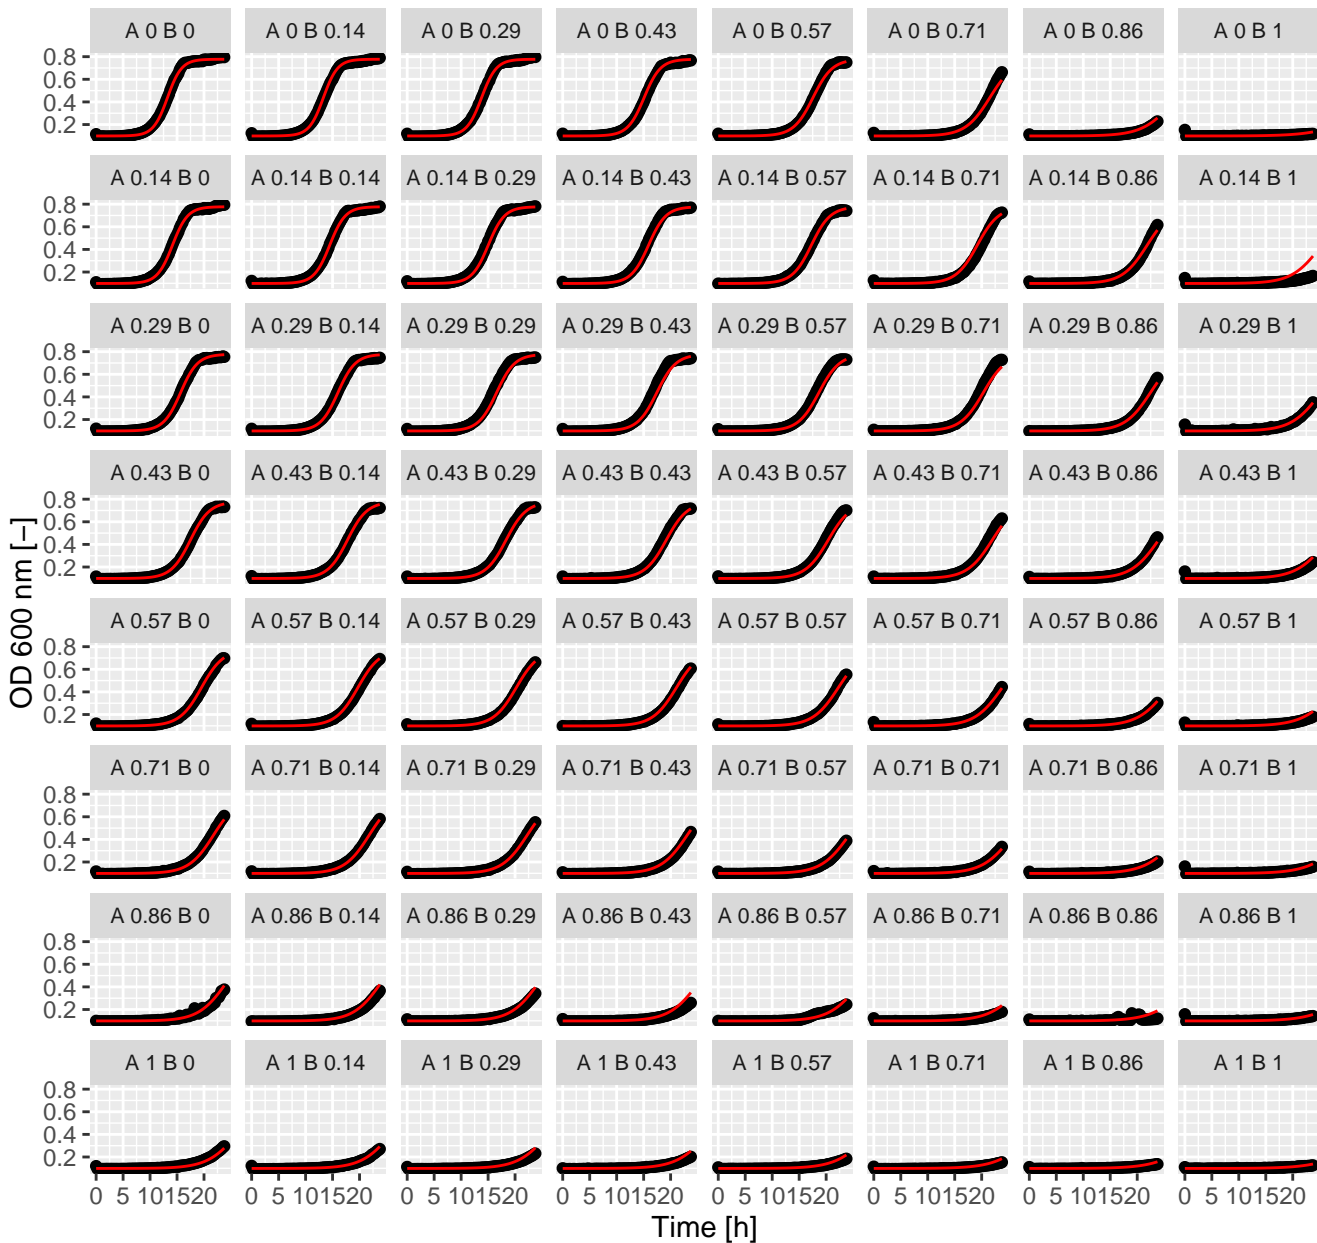

Cyc.Tac (= Ax.Bx) exp. additivity (LA)  
 Int\_AB = 0 and Int\_BA = 0 at EC50

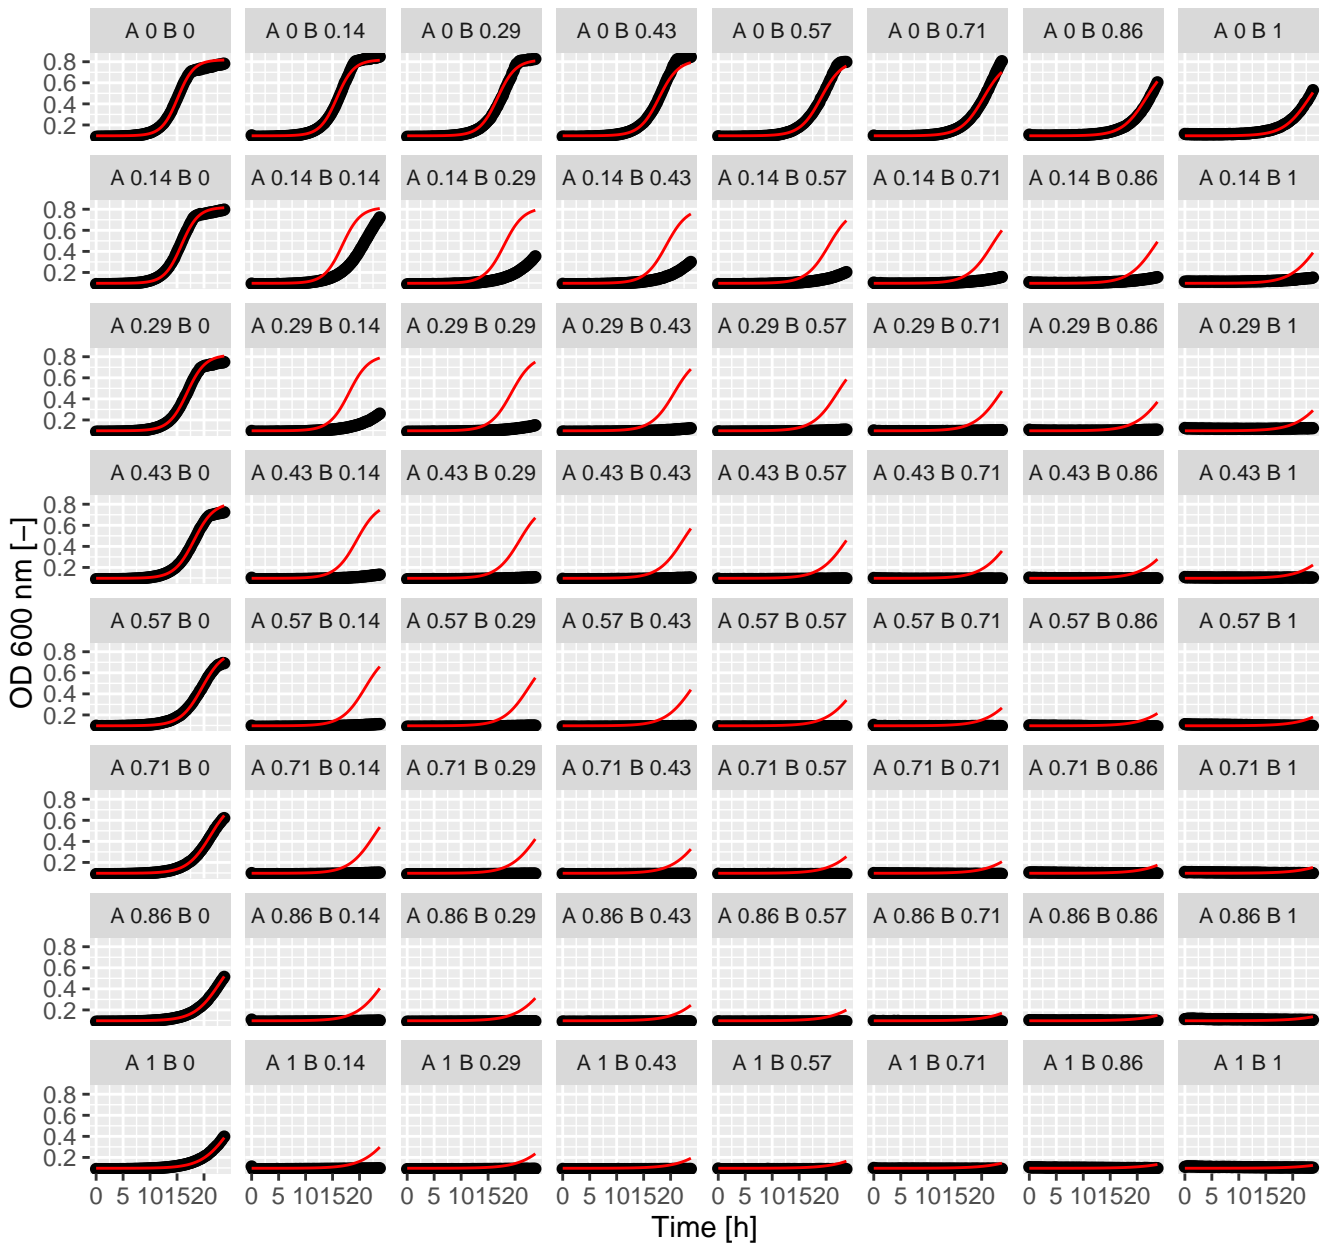

Cyc.Tac (= Ax.Bx) full GPDI  
Int\_AB = -0.87 and Int\_BA = 2.01 at EC50

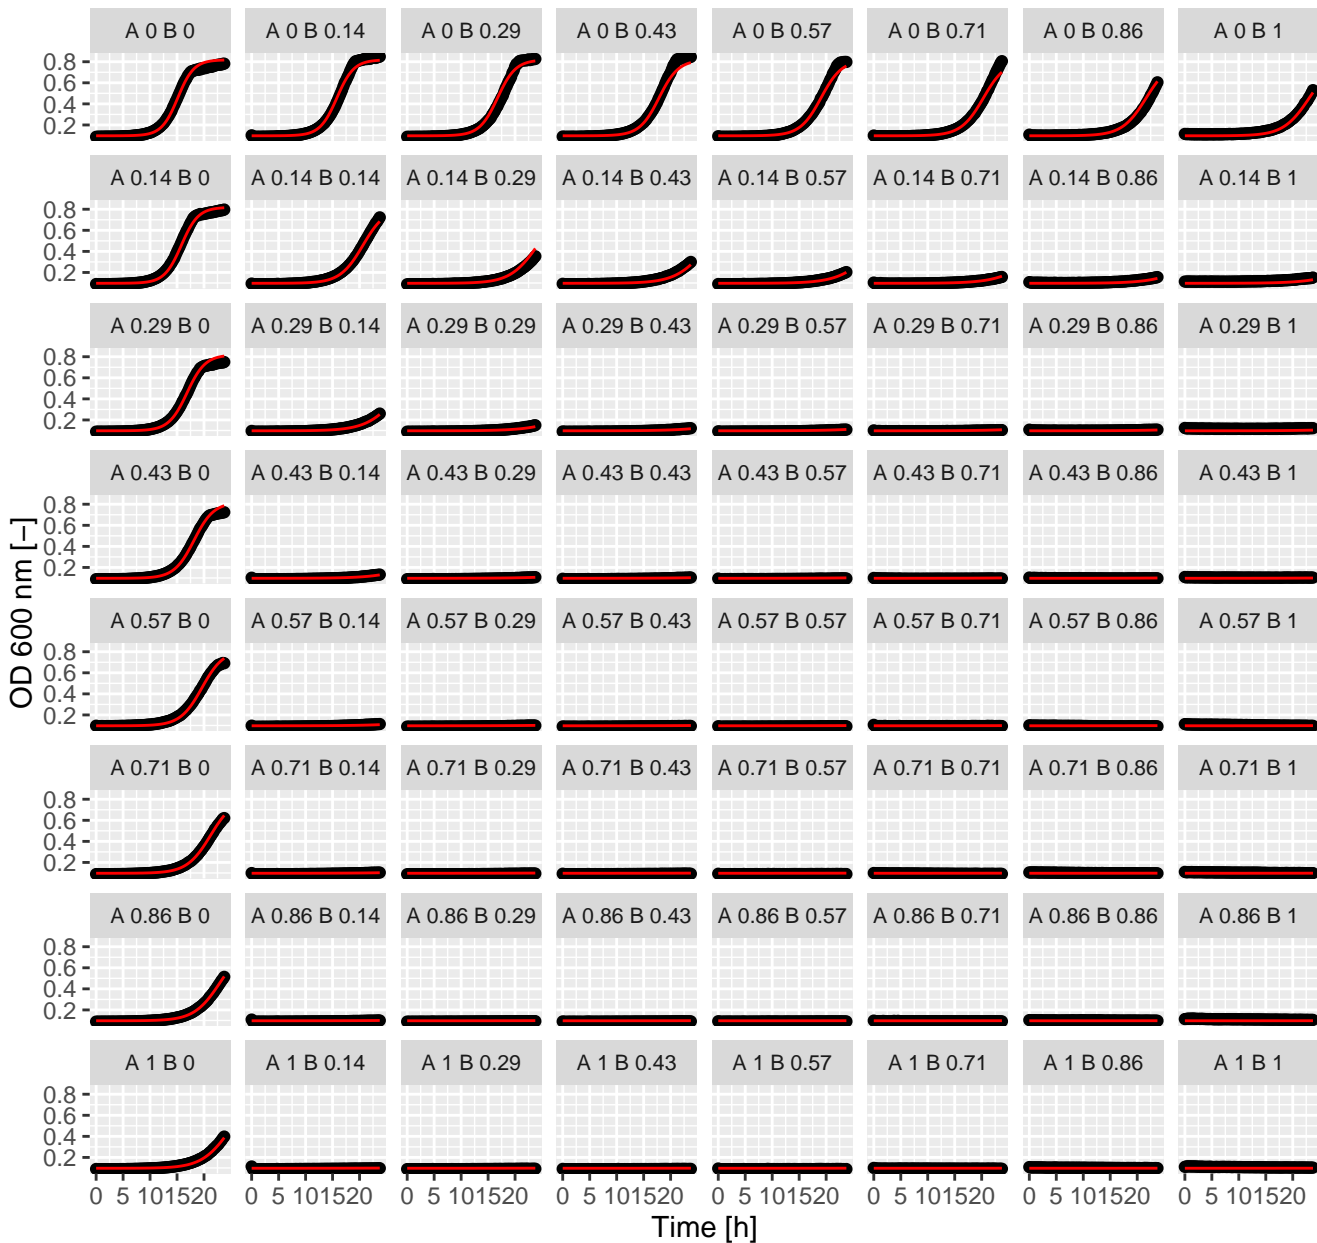

Cyc.Ter (= Ax.Bx) exp. additivity (LA)  
Int\_AB = 0 and Int\_BA = 0 at EC50

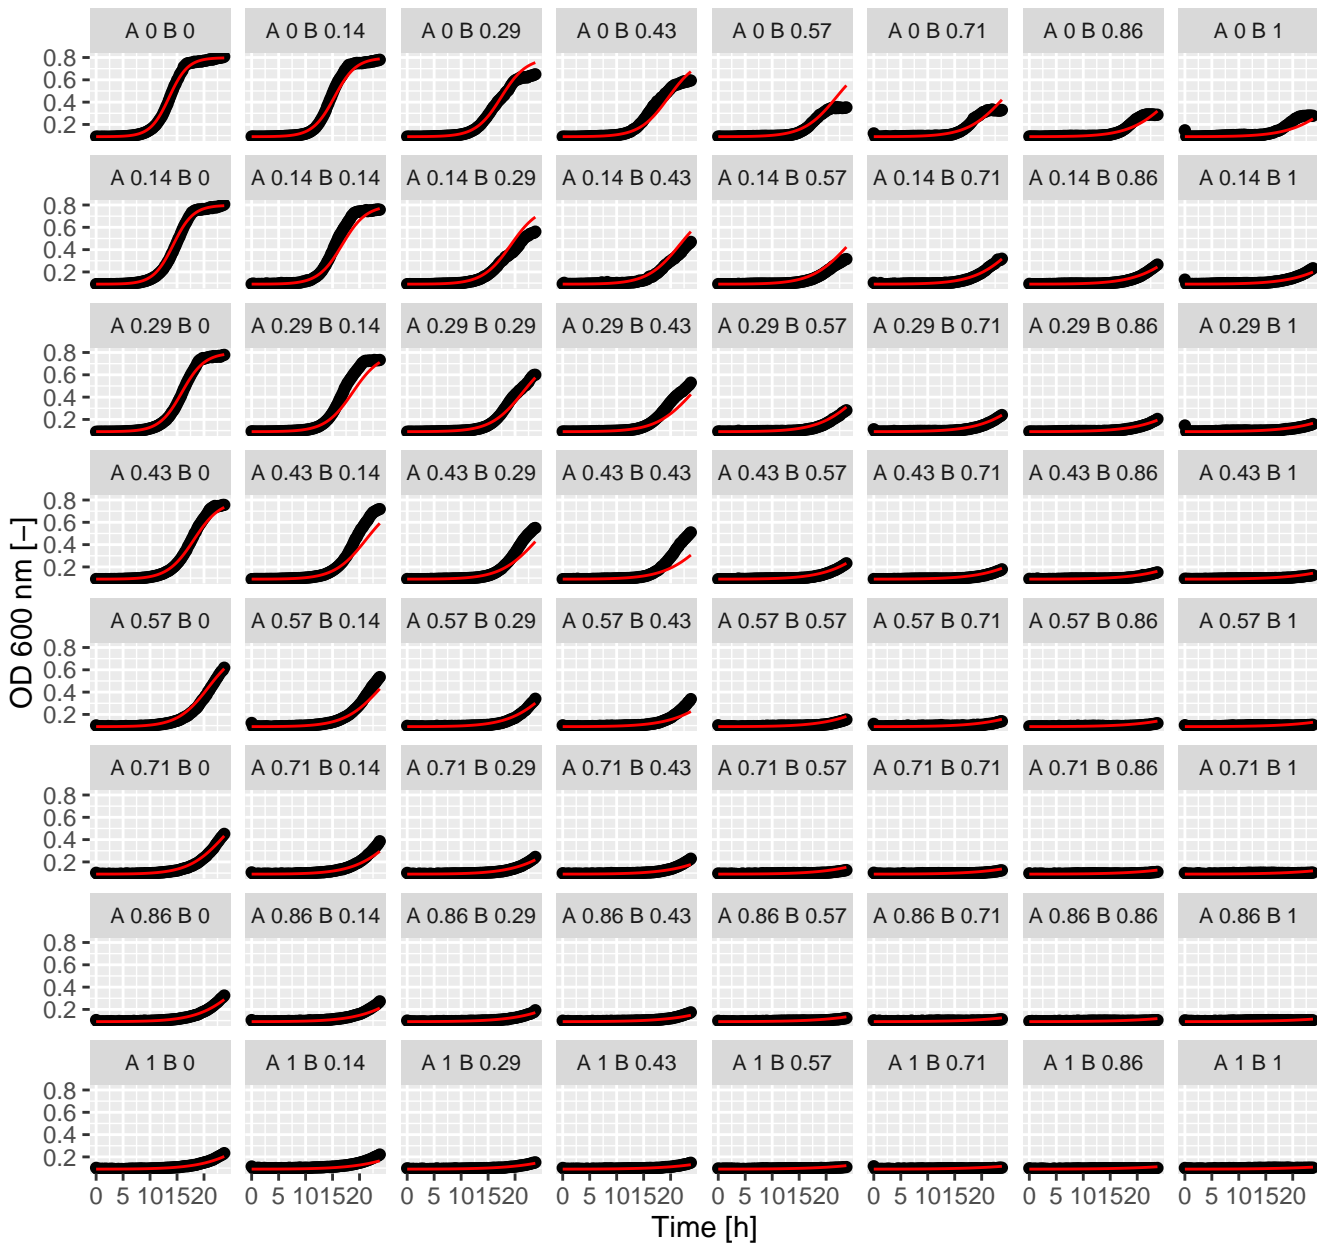

Cyc.Ter (= Ax.Bx) full GPDI  
Int\_AB = 0.23 and Int\_BA = -0.08 at EC50

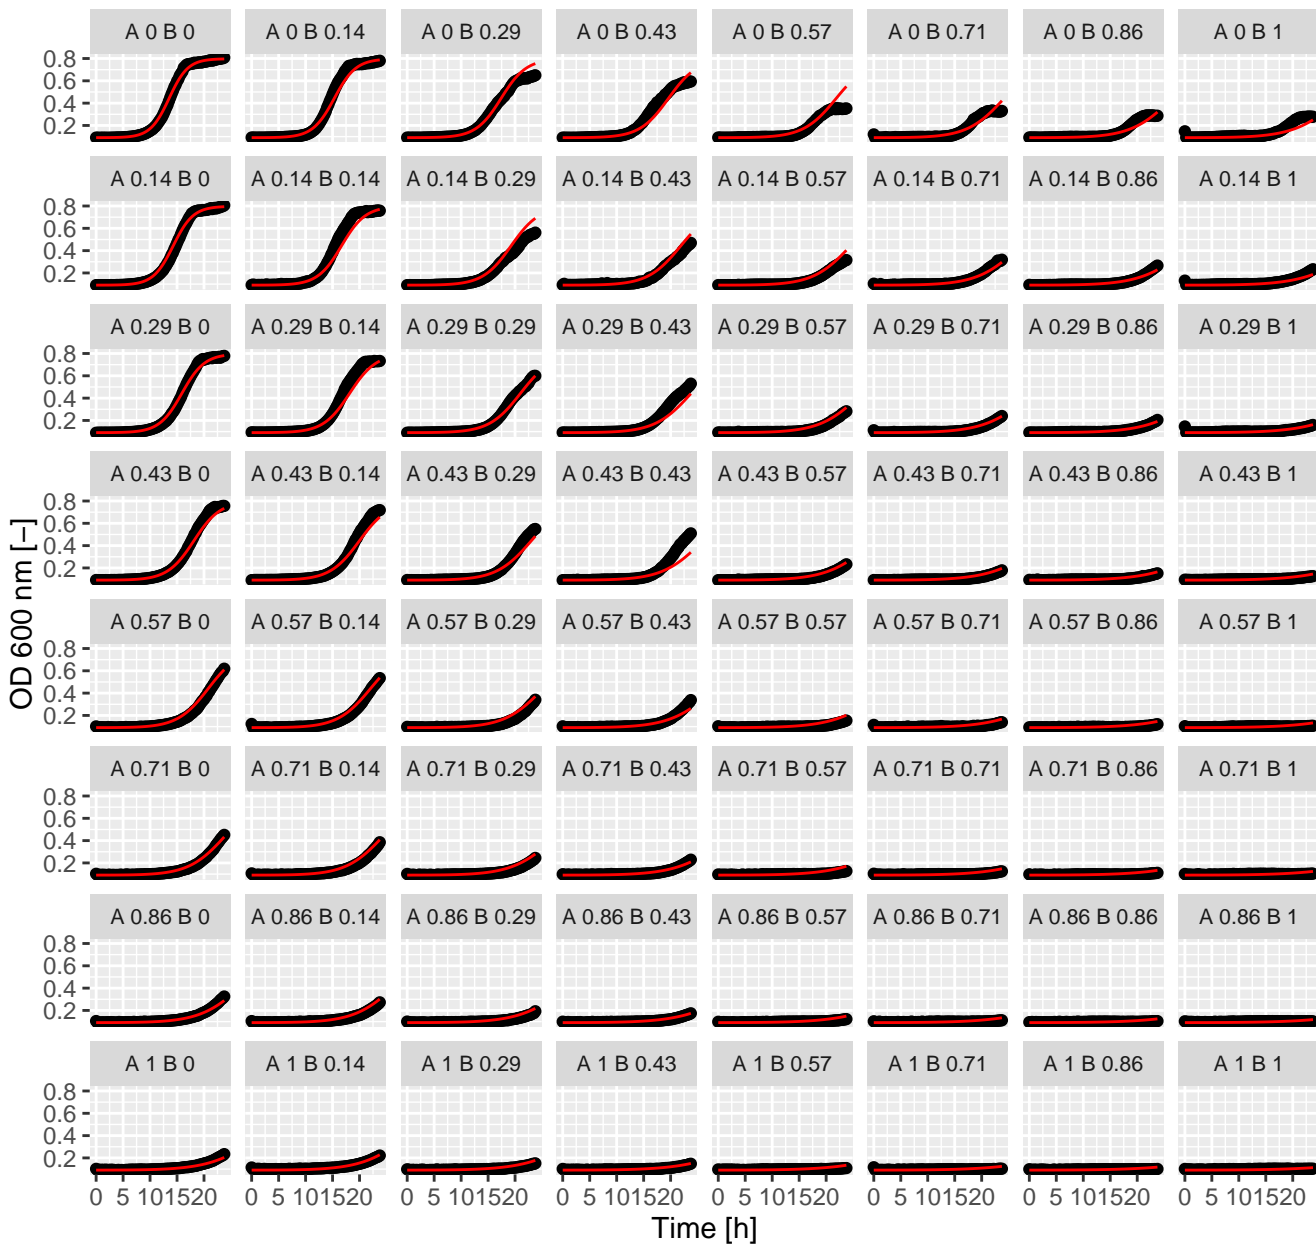

Dyc.Dyc (= Ax.Bx) exp. additivity (LA)  
Int\_AB = 0 and Int\_BA = 0 at EC50

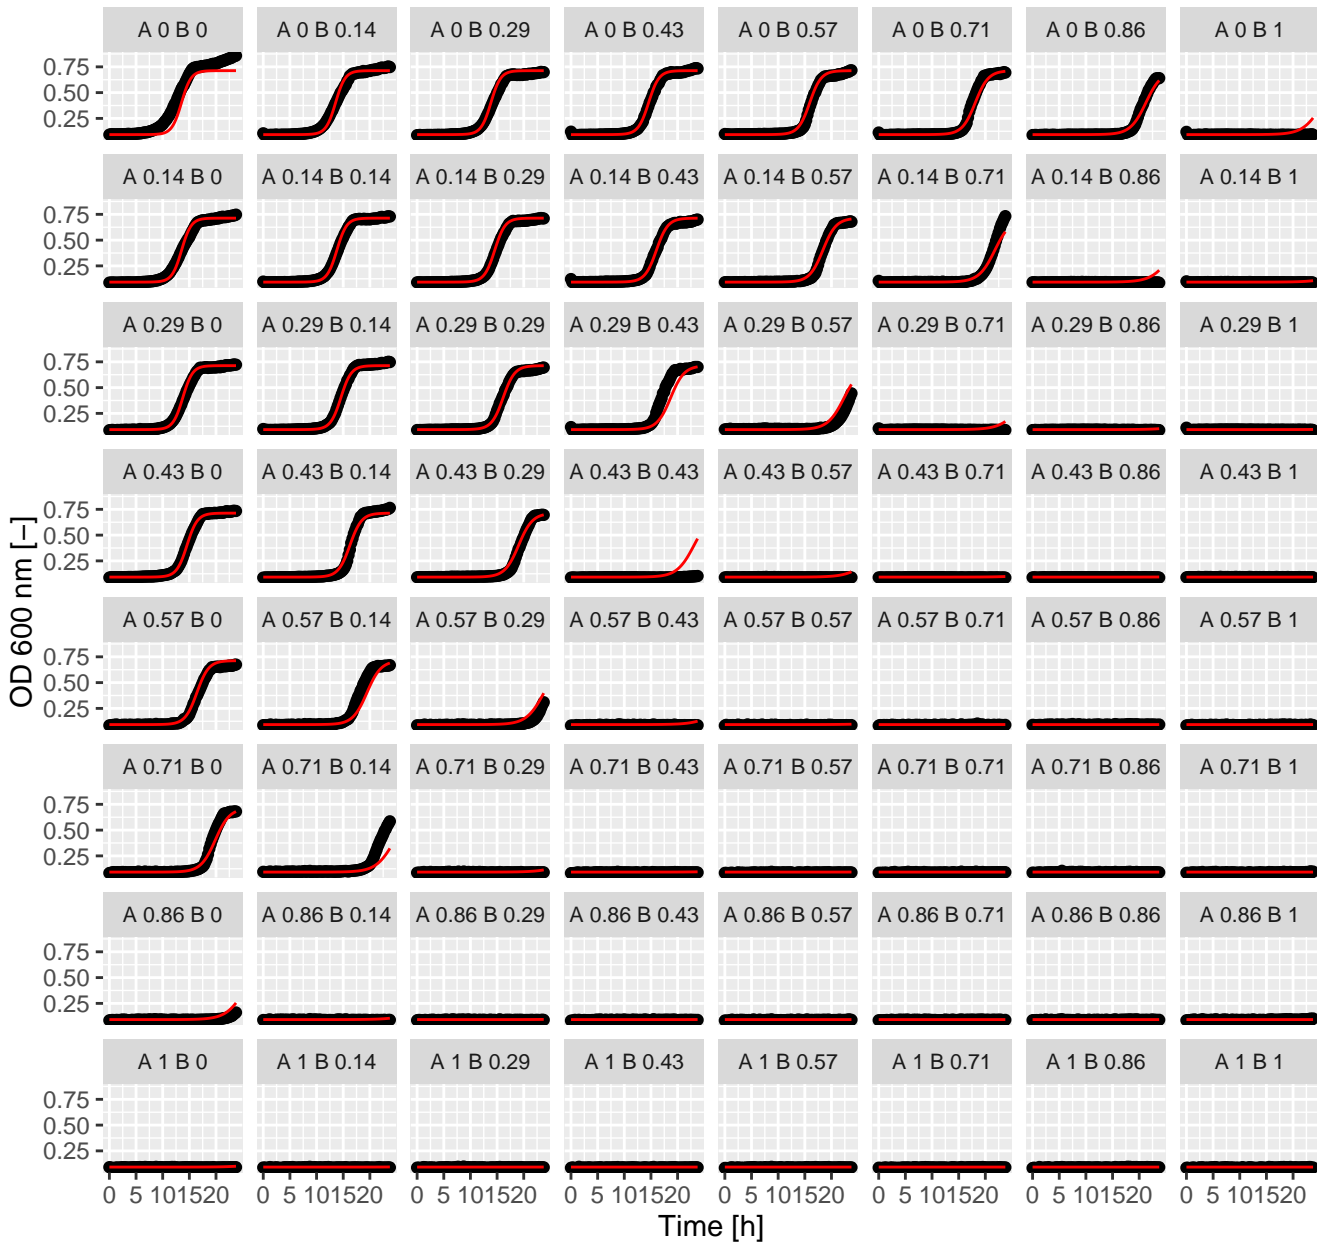

Dyc.Dyc (= Ax.Bx) full GPDI  
 Int\_AB = -0.23 and Int\_BA = 0.23 at EC50

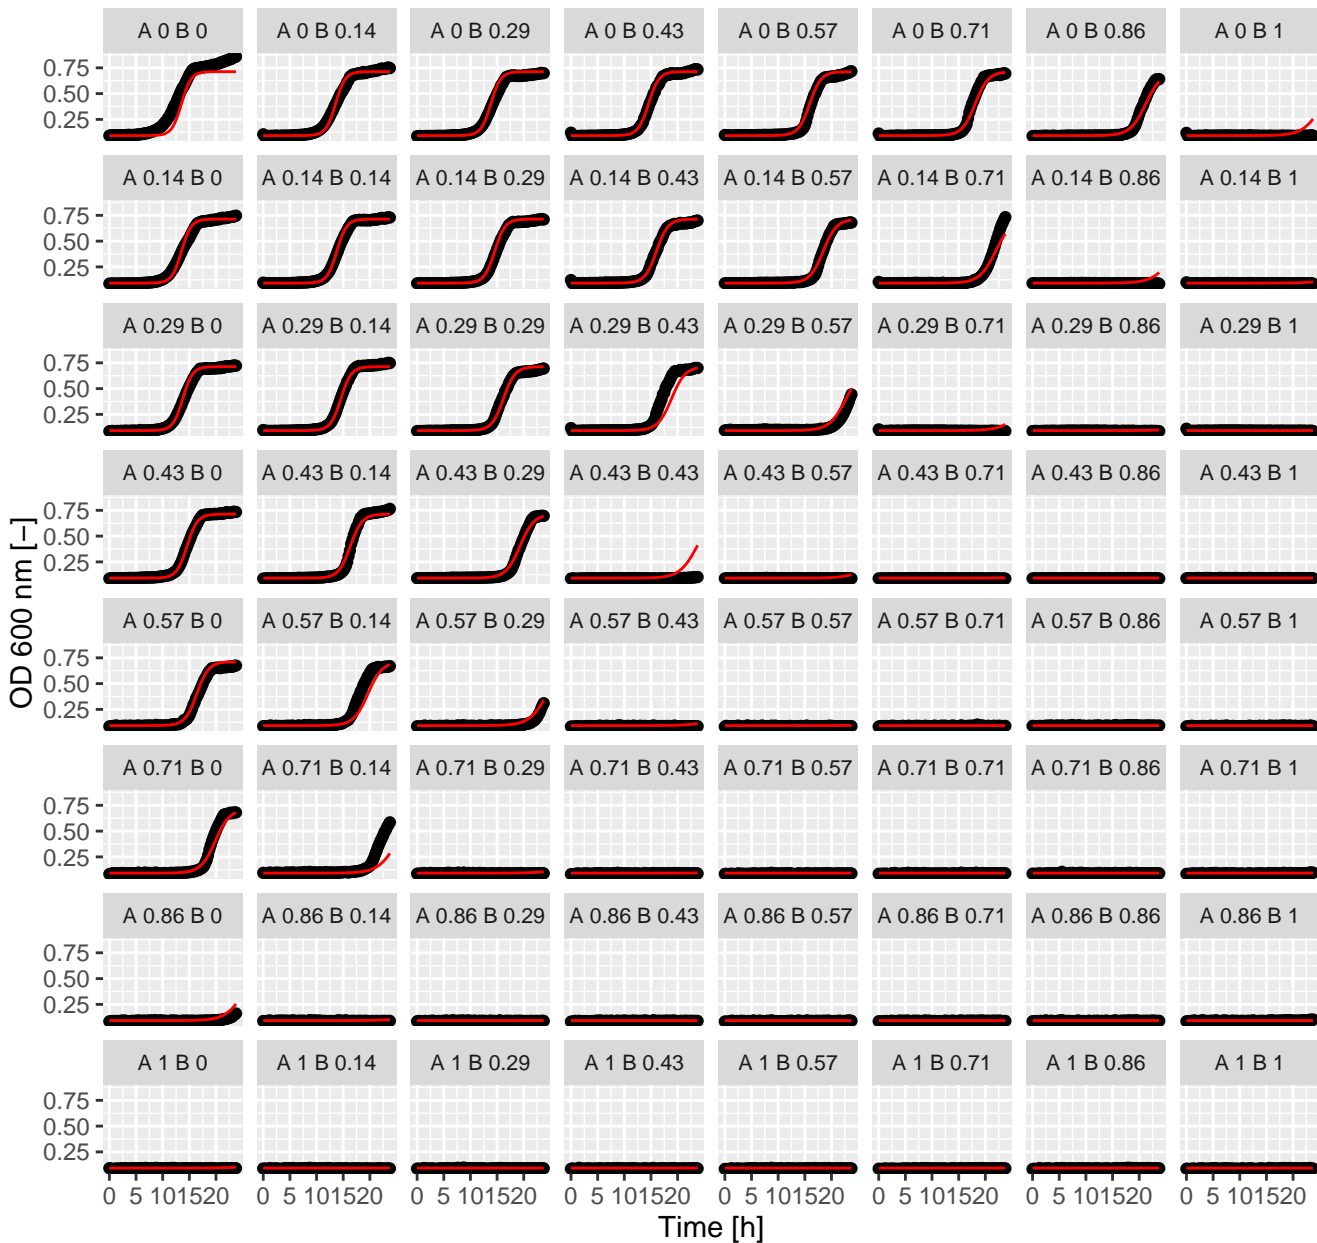



Dyc.Fen (= Ax.Bx) exp. additivity (LA)  
Int\_AB = 0 and Int\_BA = 0 at EC50

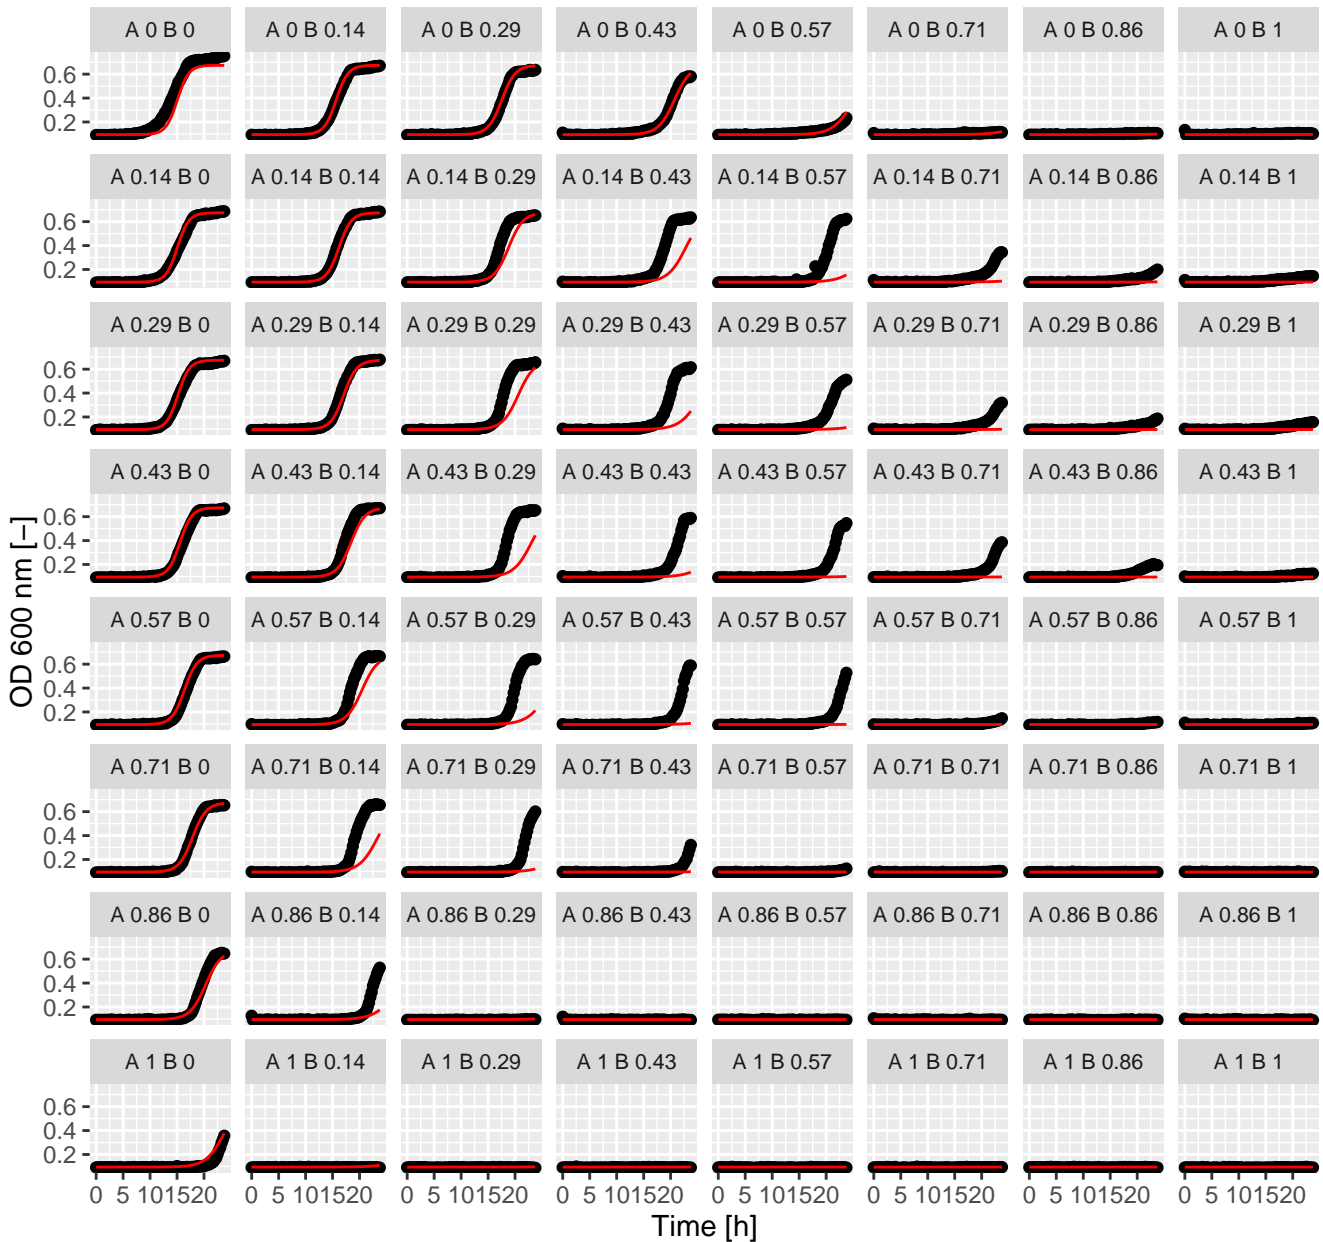

Dyc.Fen (= Ax.Bx) full GPDI  
 Int\_AB = -0.03 and Int\_BA = 1.86 at EC50

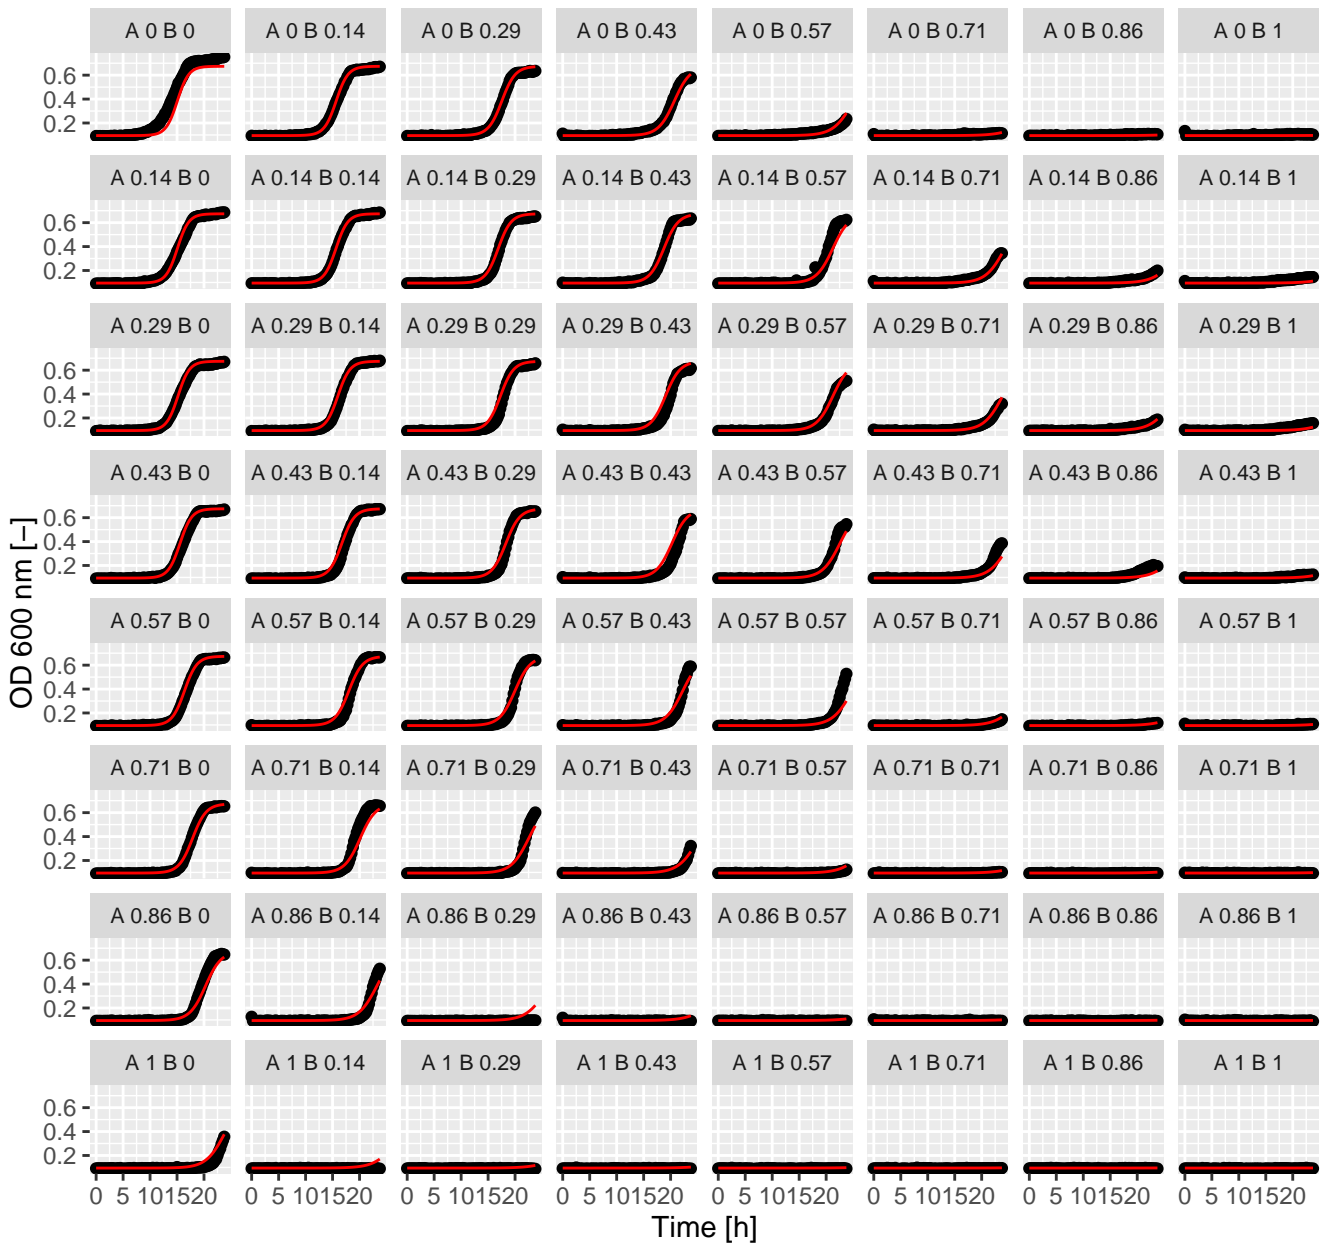

Dyc.Hal (= Ax.Bx) exp. additivity (LA)  
Int\_AB = 0 and Int\_BA = 0 at EC50

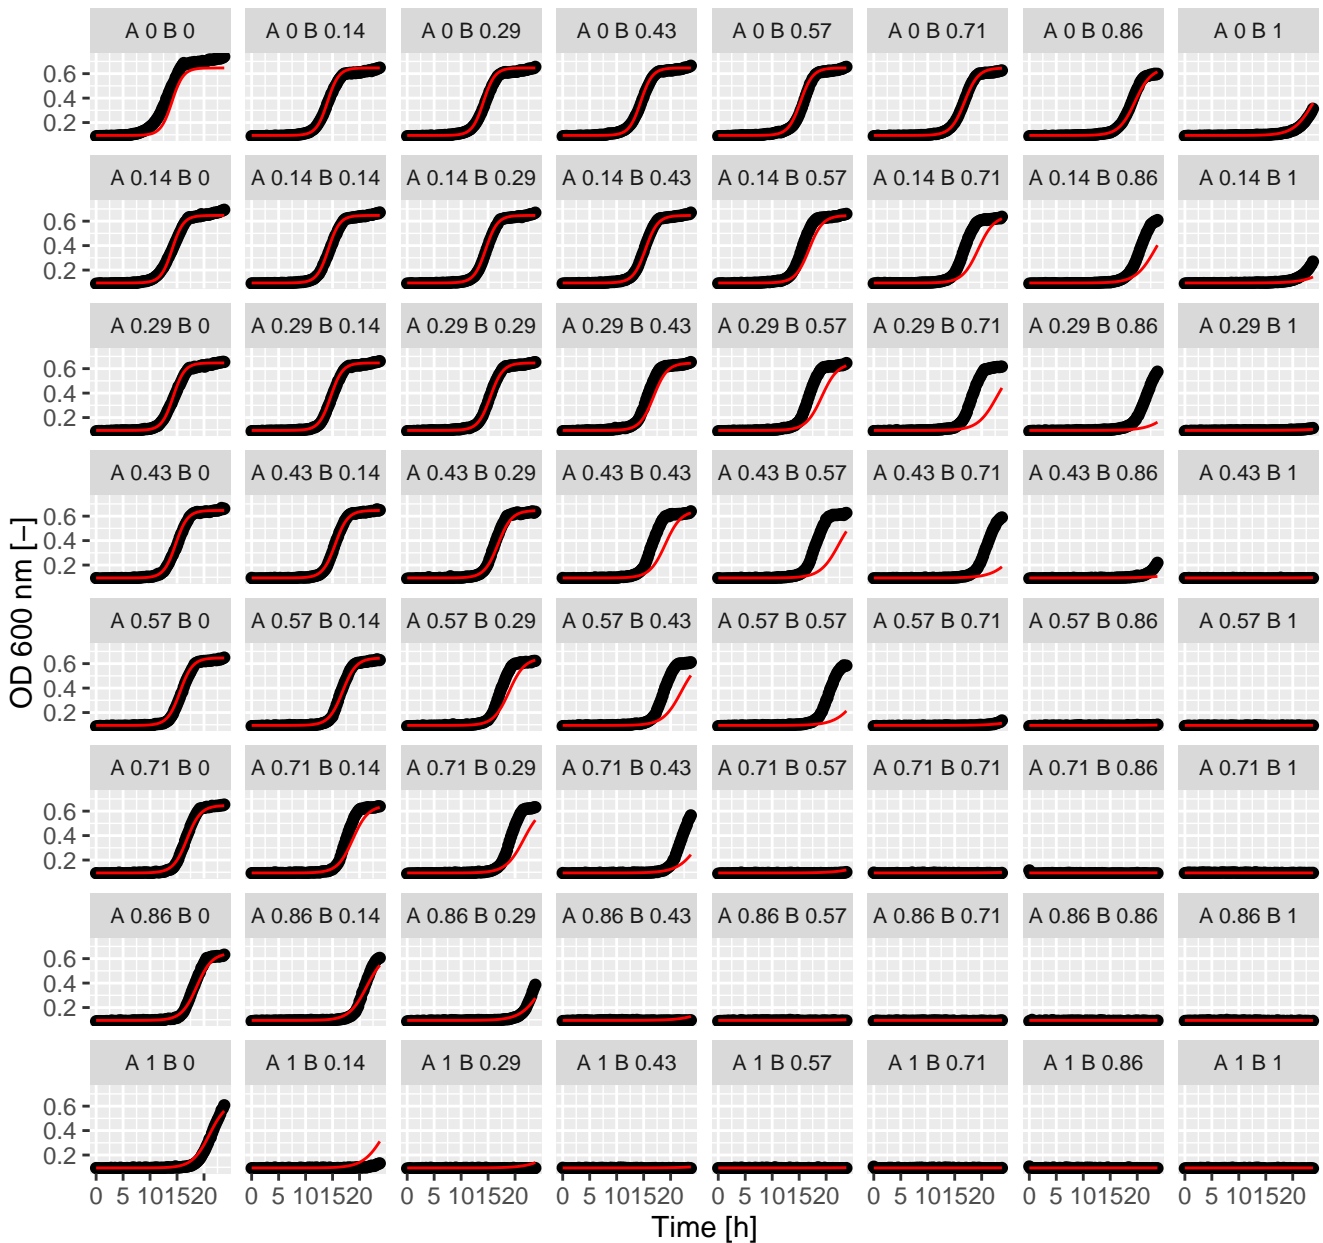

Dyc.Hal (= Ax.Bx) full GPDI  
Int\_AB = -0.03 and Int\_BA = 0.53 at EC50

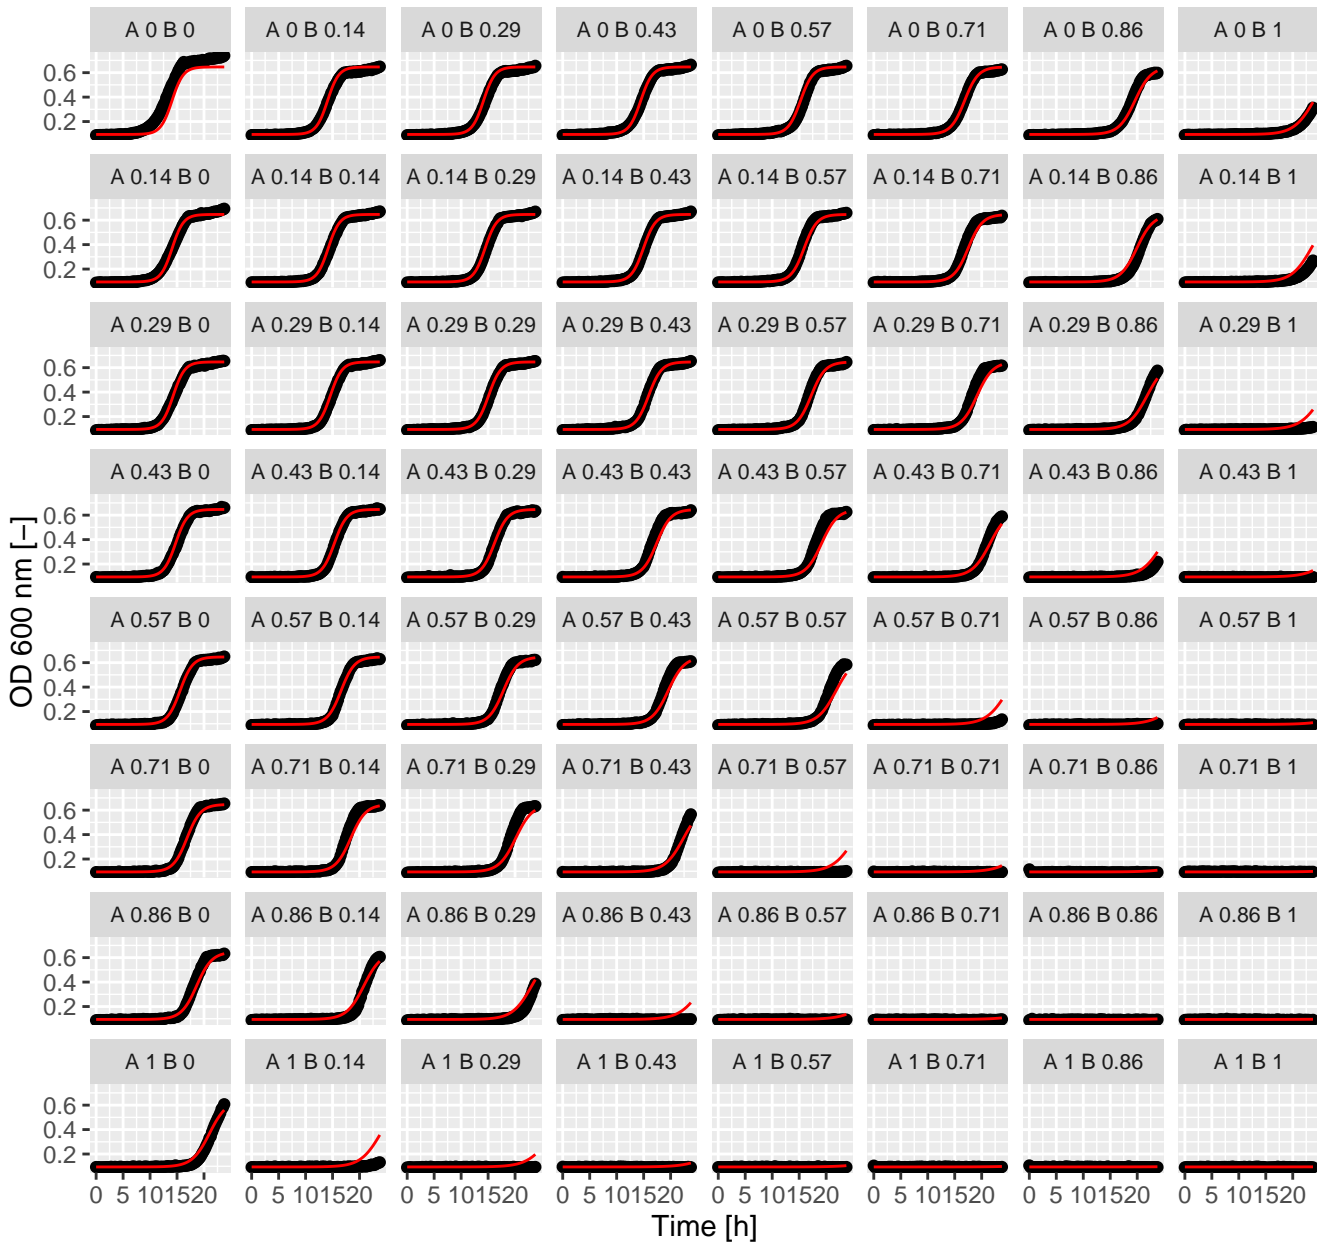

Dyc.Lat (= Ax.Bx) exp. additivity (LA)  
 Int\_AB = 0 and Int\_BA = 0 at EC50

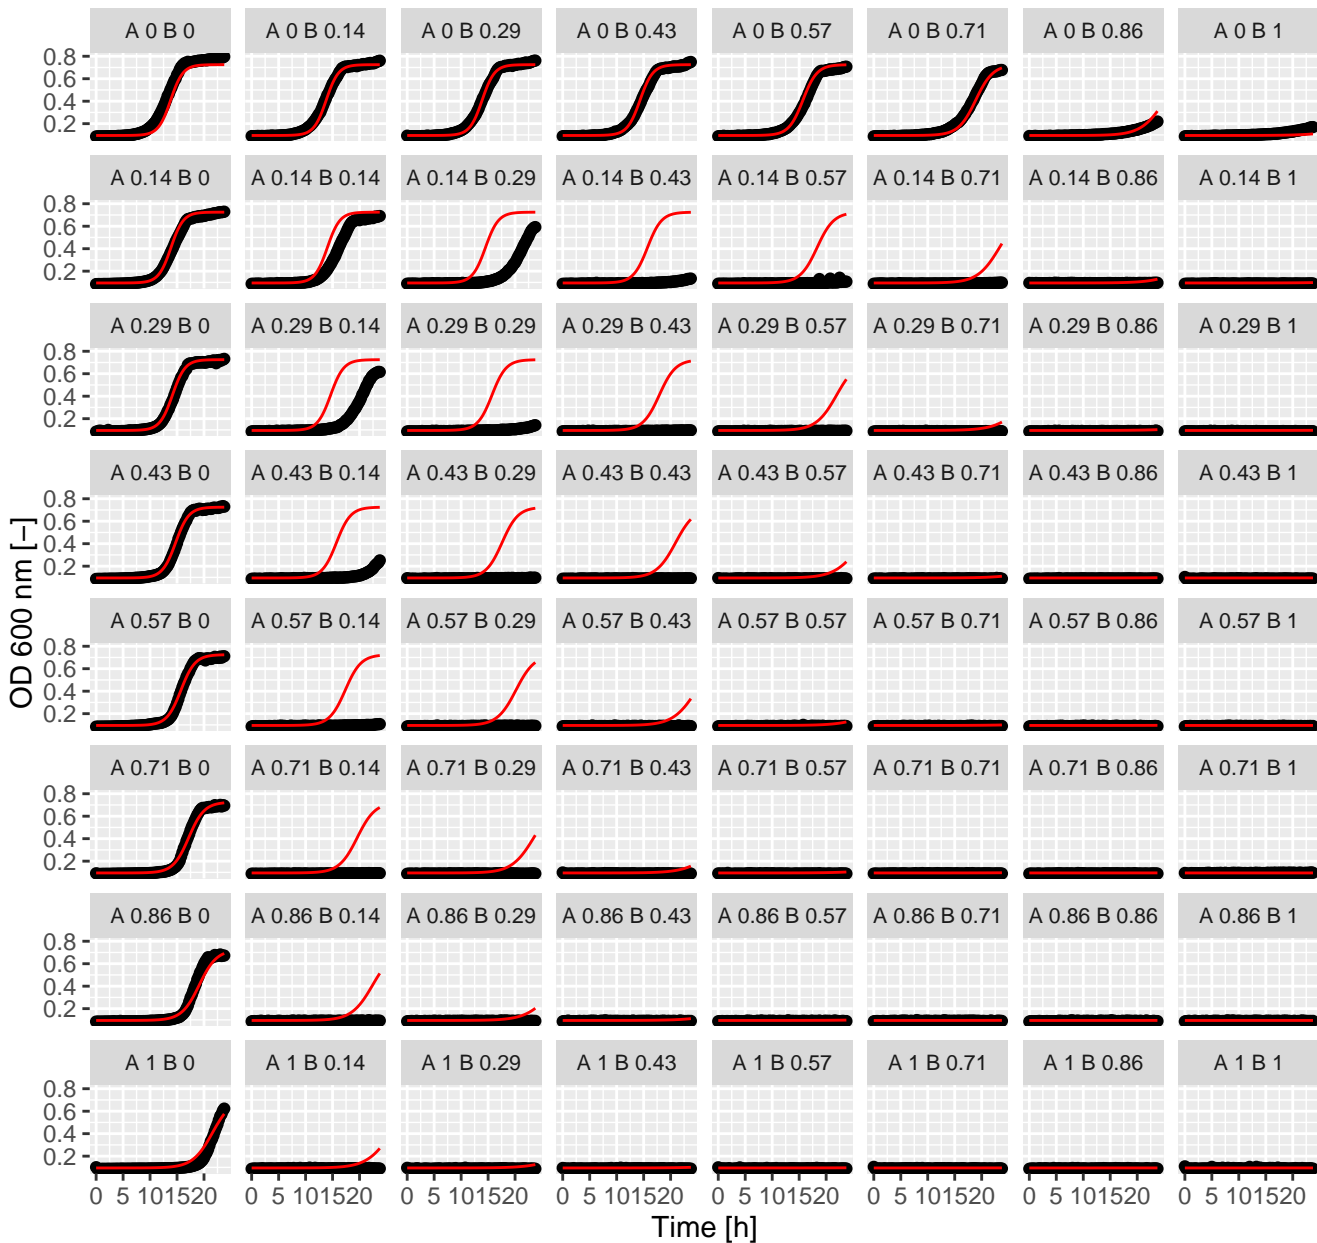

Dyc.Lat (= Ax.Bx) full GPDI  
Int\_AB = -0.53 and Int\_BA = -0.48 at EC50

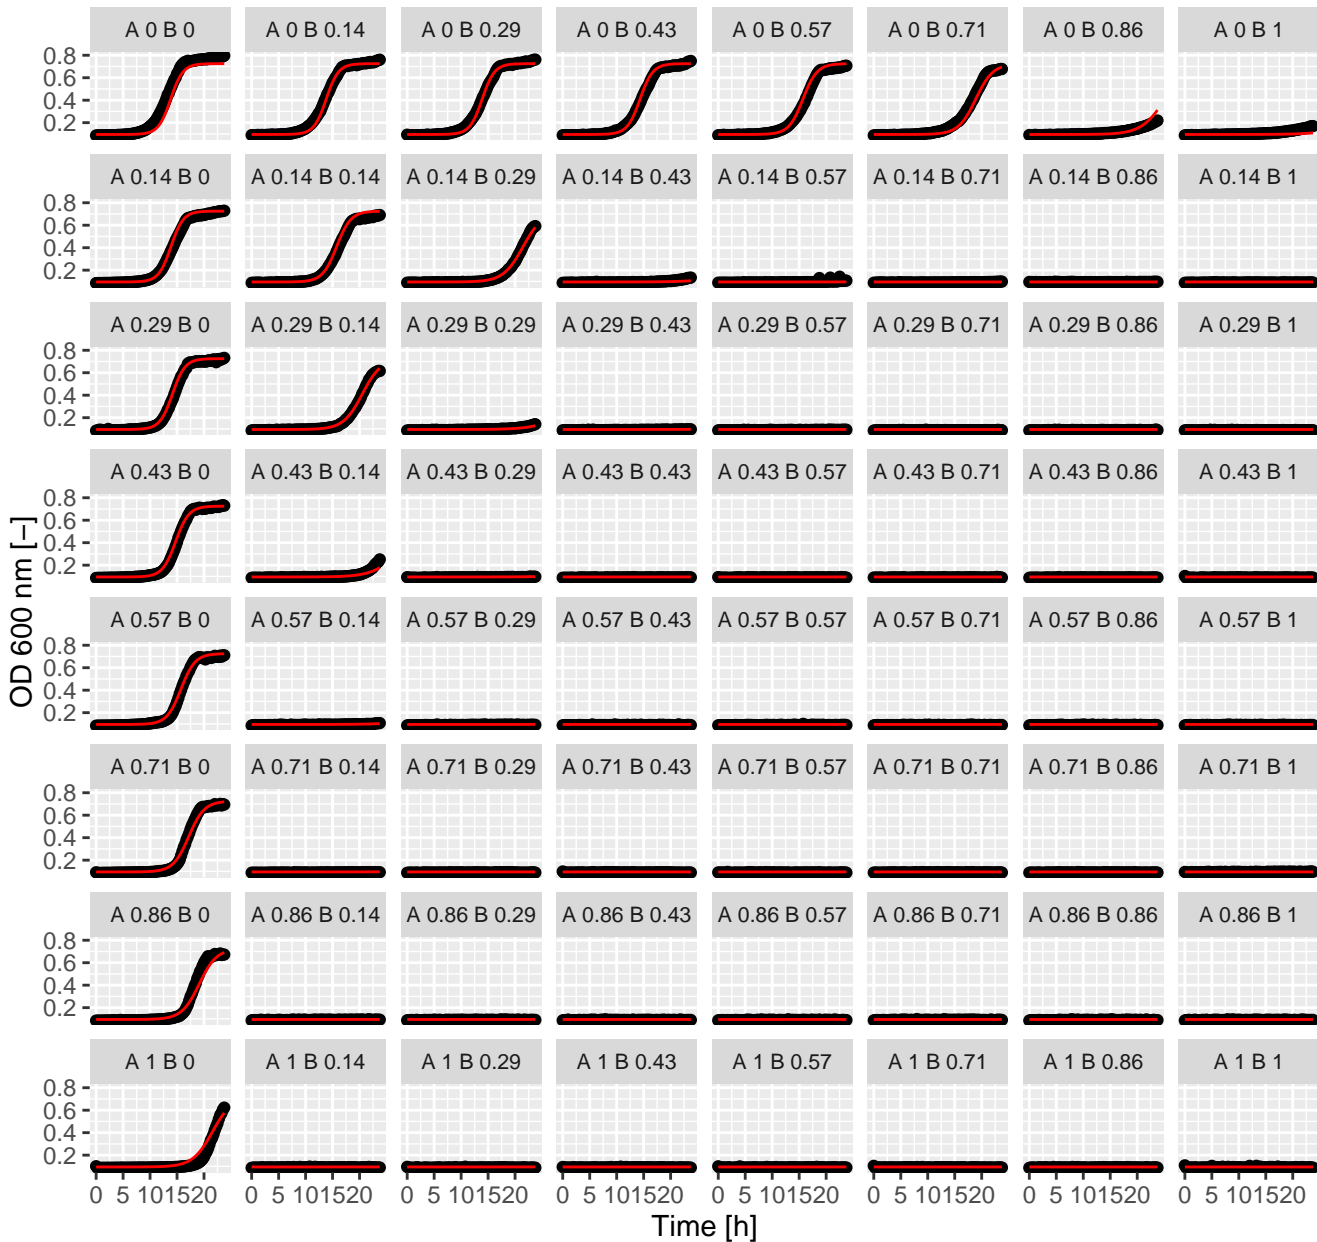

Dyc.Pen (= Ax.Bx) exp. additivity (LA)  
 Int\_AB = 0 and Int\_BA = 0 at EC50

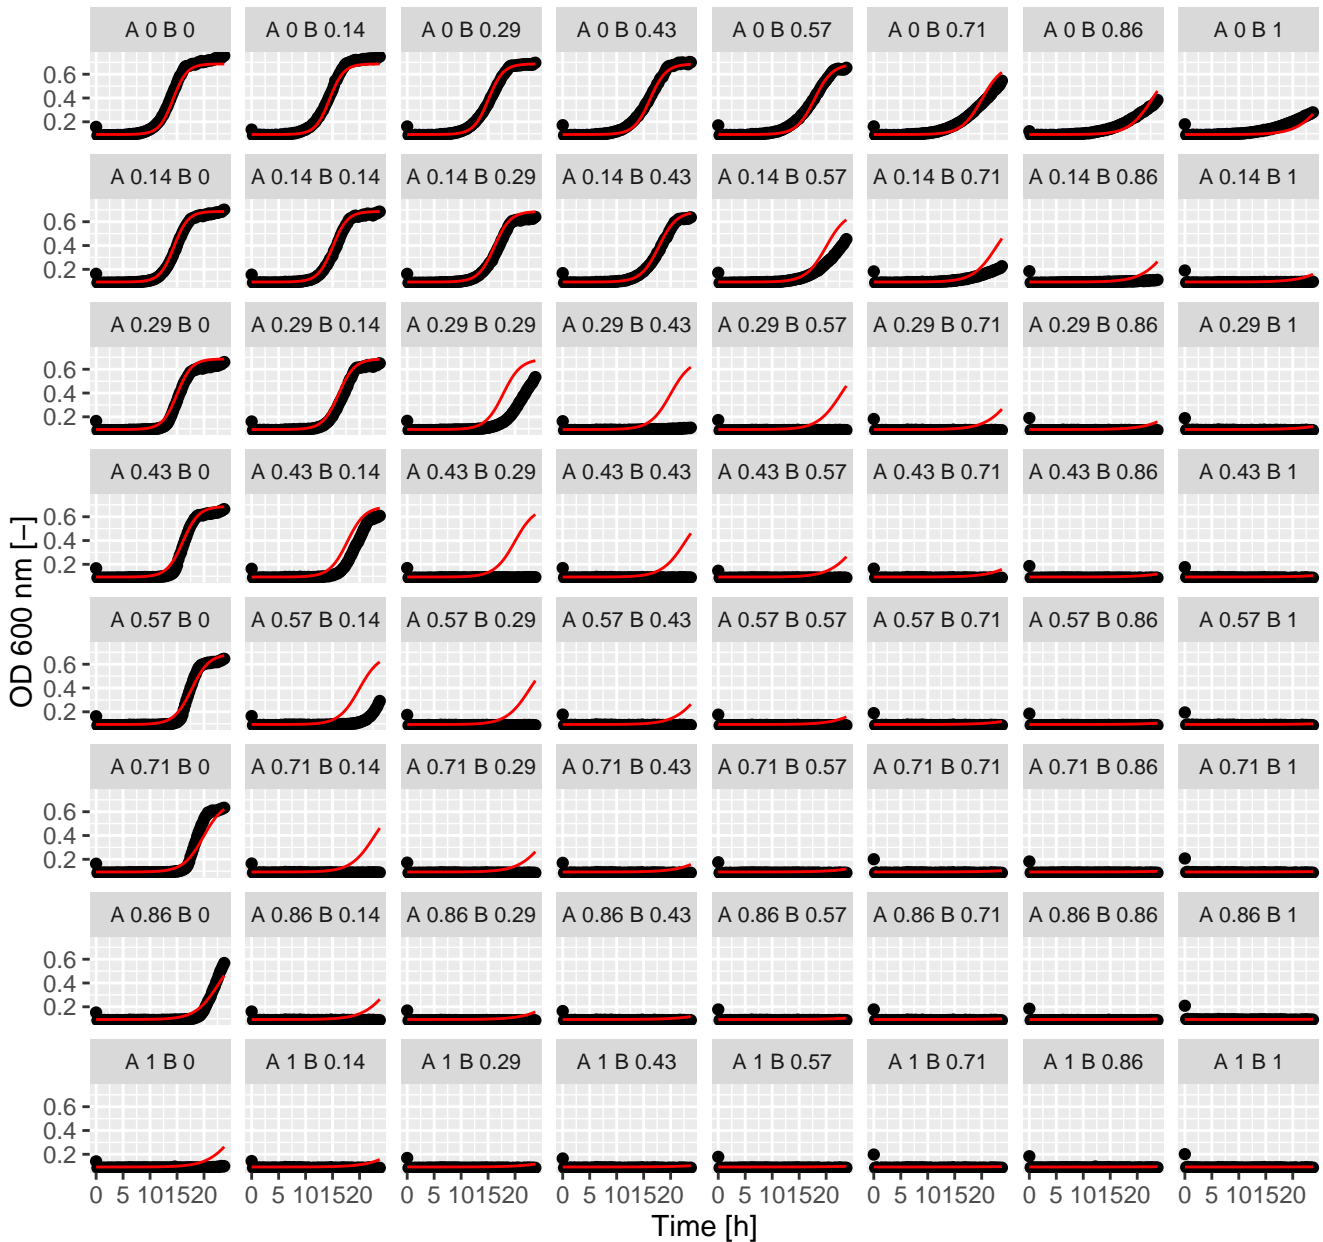

Dyc.Pen (= Ax.Bx) full GPDI  
Int\_AB = -0.23 and Int\_BA = -0.64 at EC50

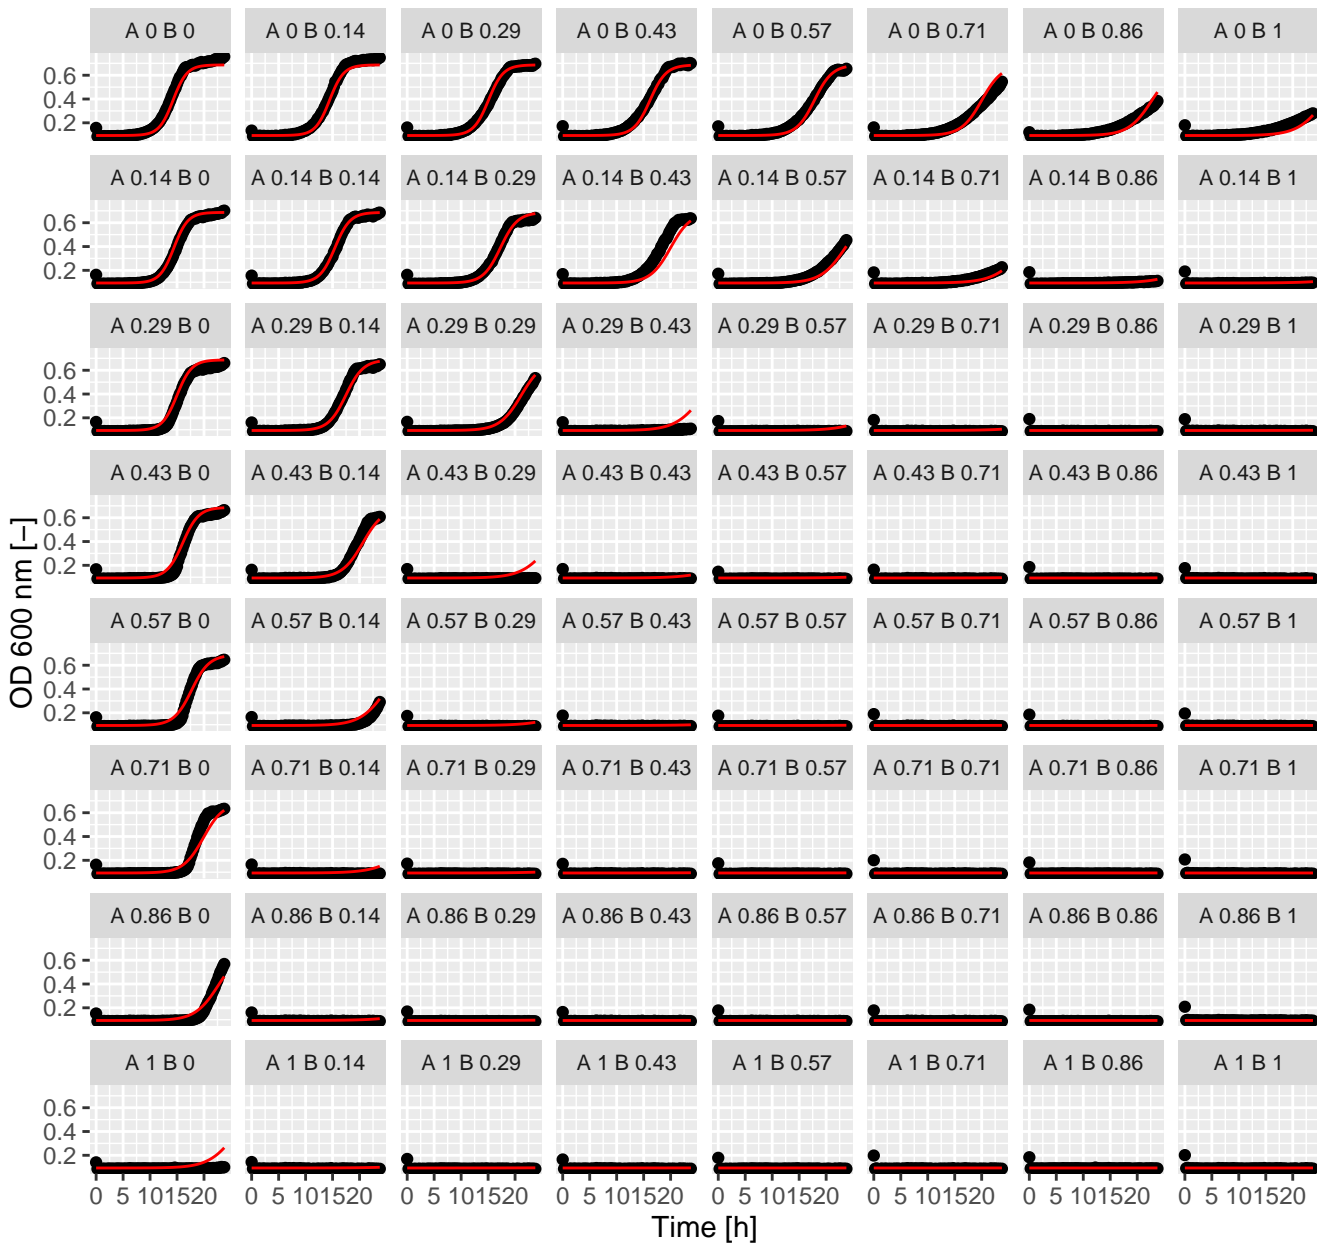



Dyc.Rap (= Ax.Bx) exp. additivity (LA)  
Int\_AB = 0 and Int\_BA = 0 at EC50

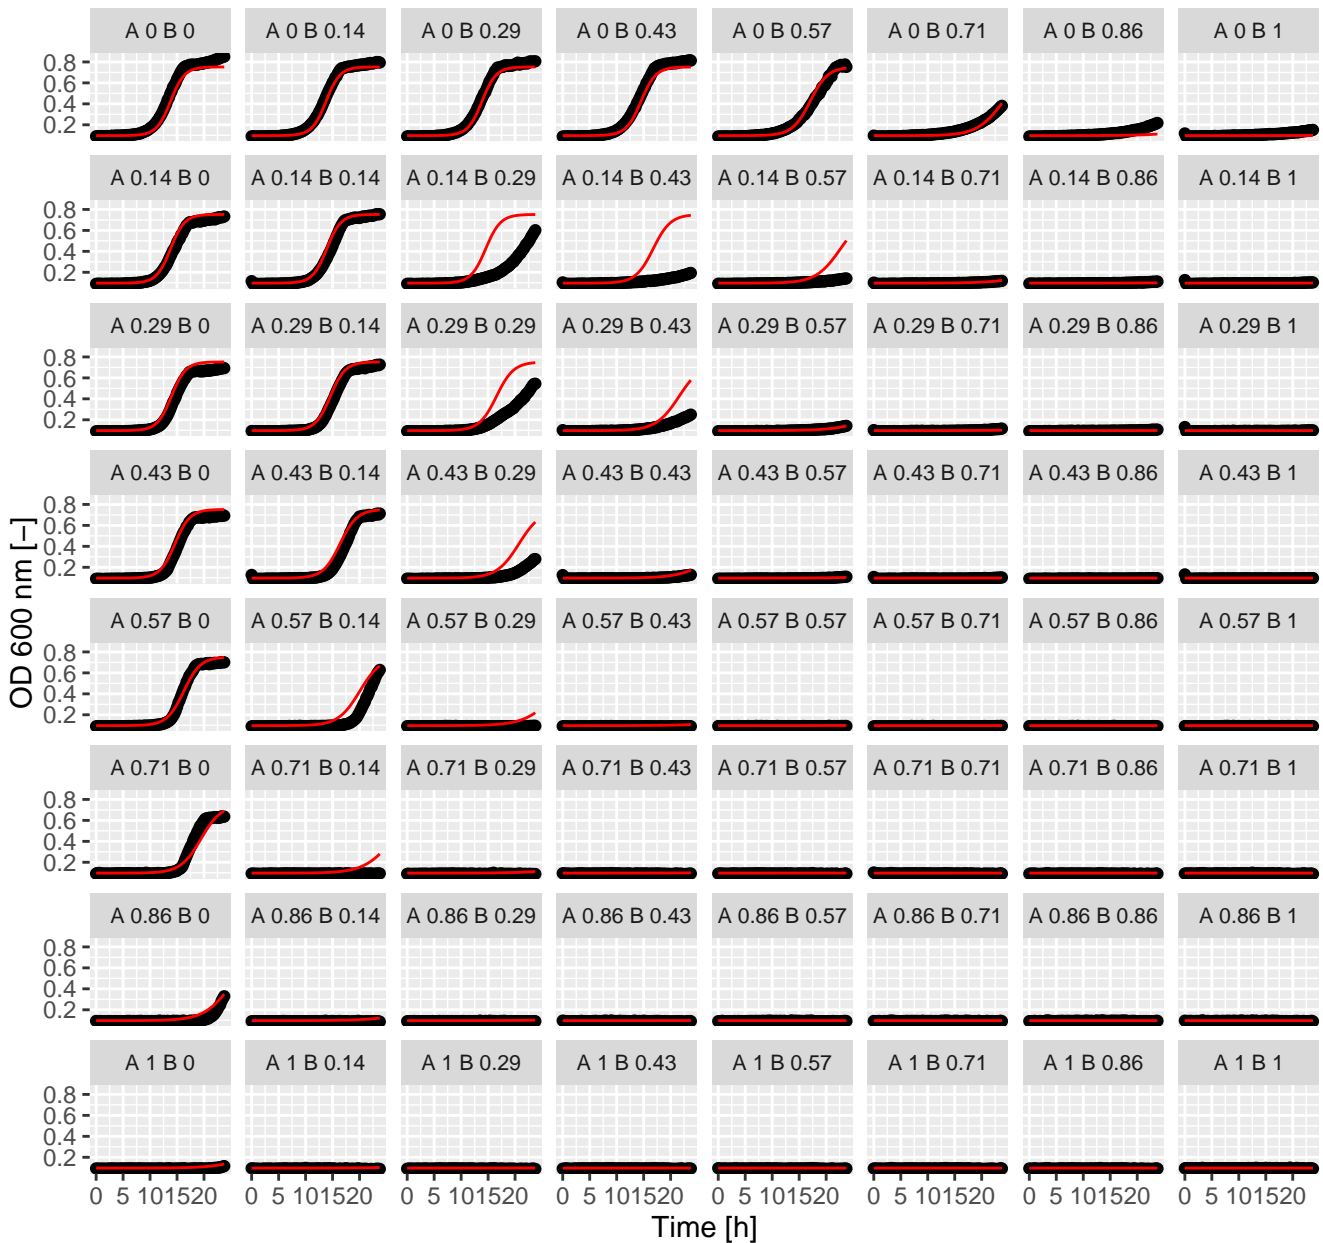

Dyc.Rap (= Ax.Bx) full GPDI  
Int\_AB = 0.25 and Int\_BA = -0.45 at EC50

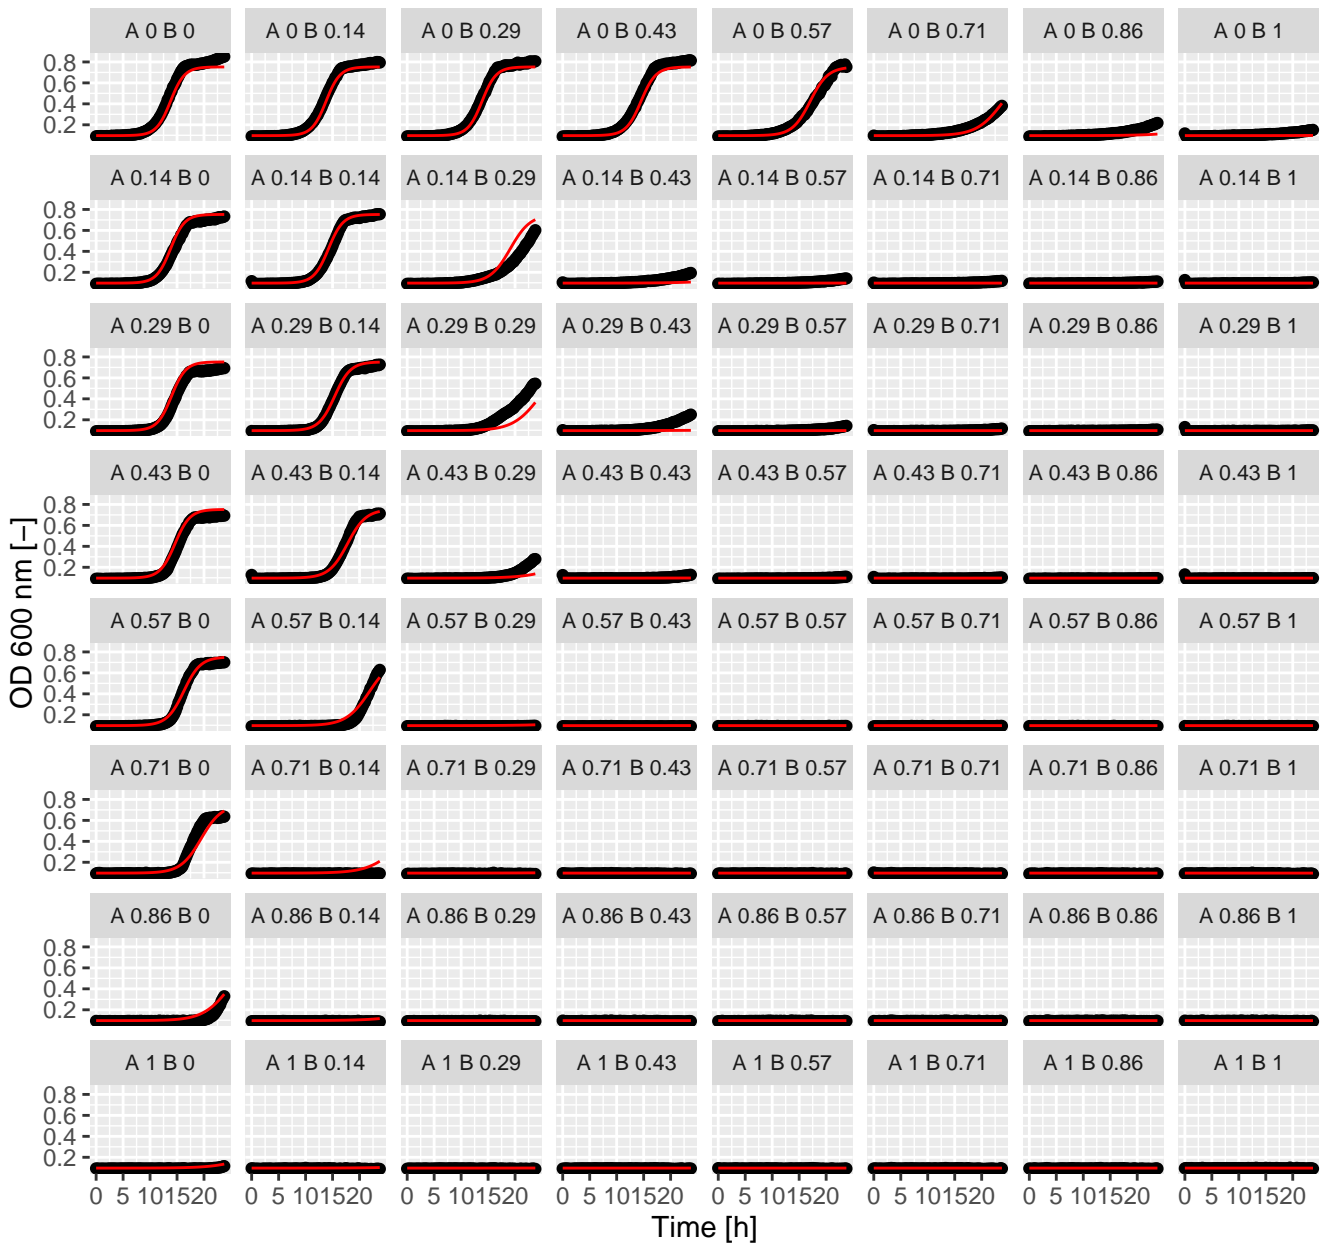

Dyc.Sta (= Ax.Bx) exp. additivity (LA)  
Int\_AB = 0 and Int\_BA = 0 at EC50

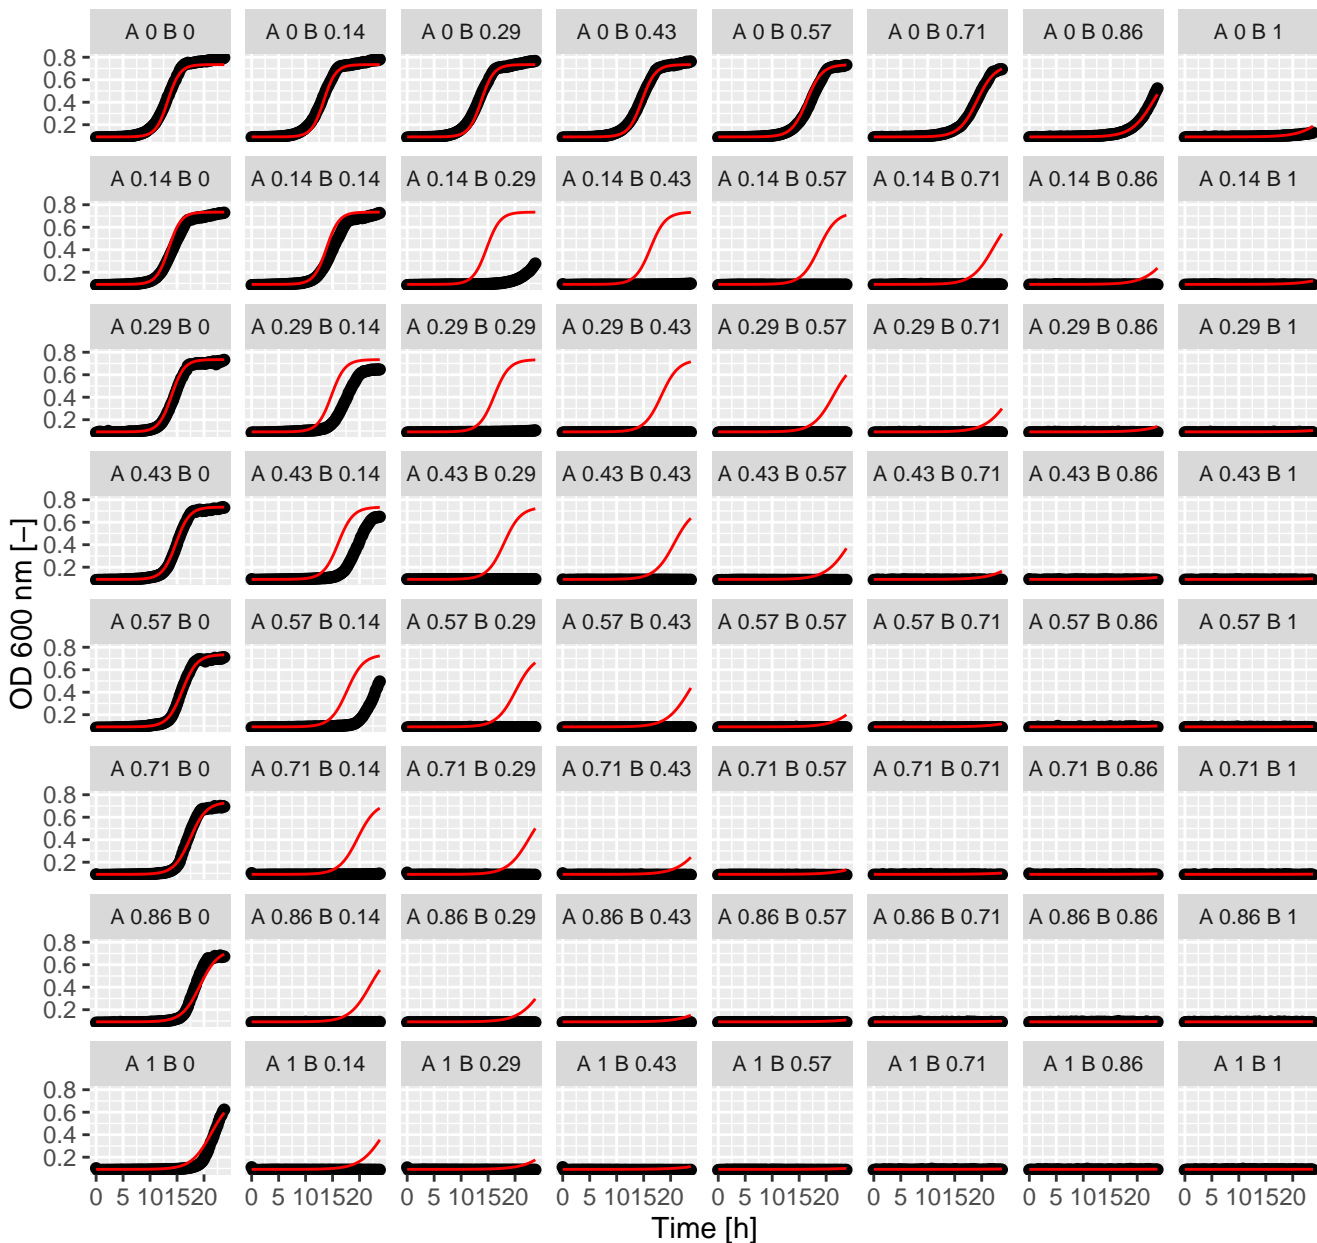

Dyc.Sta (= Ax.Bx) full GPDI  
Int\_AB = 0.02 and Int\_BA = -0.67 at EC50

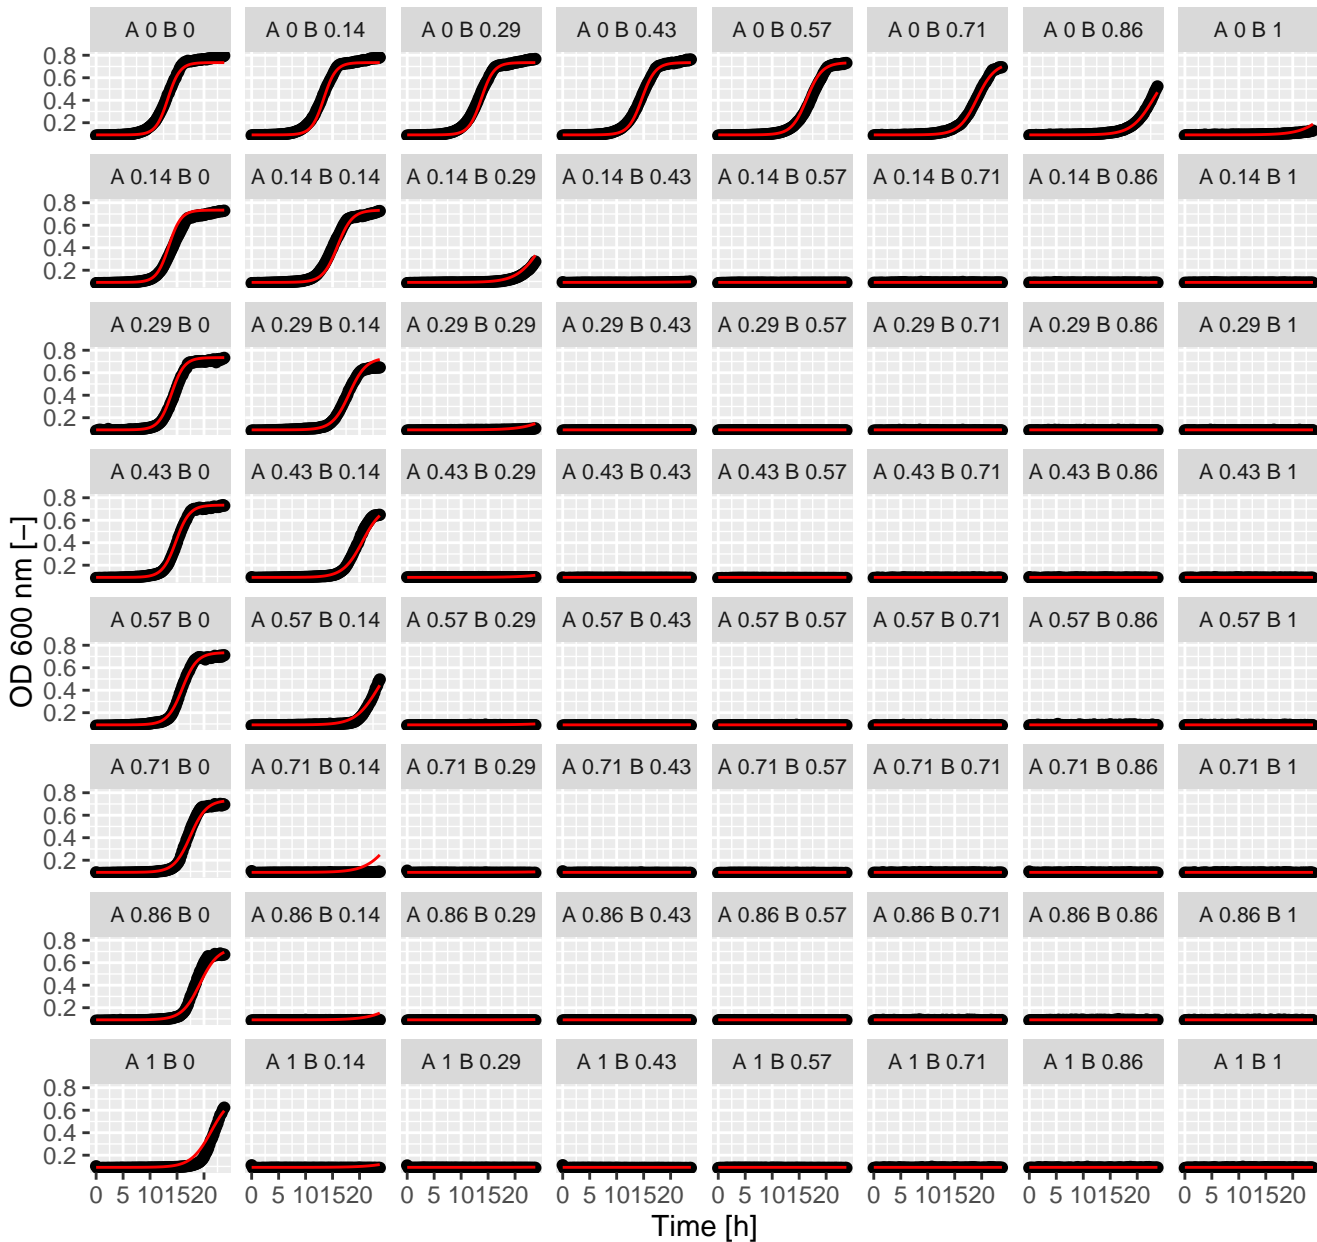

Dyc.Tac (= Ax.Bx) exp. additivity (LA)  
Int\_AB = 0 and Int\_BA = 0 at EC50

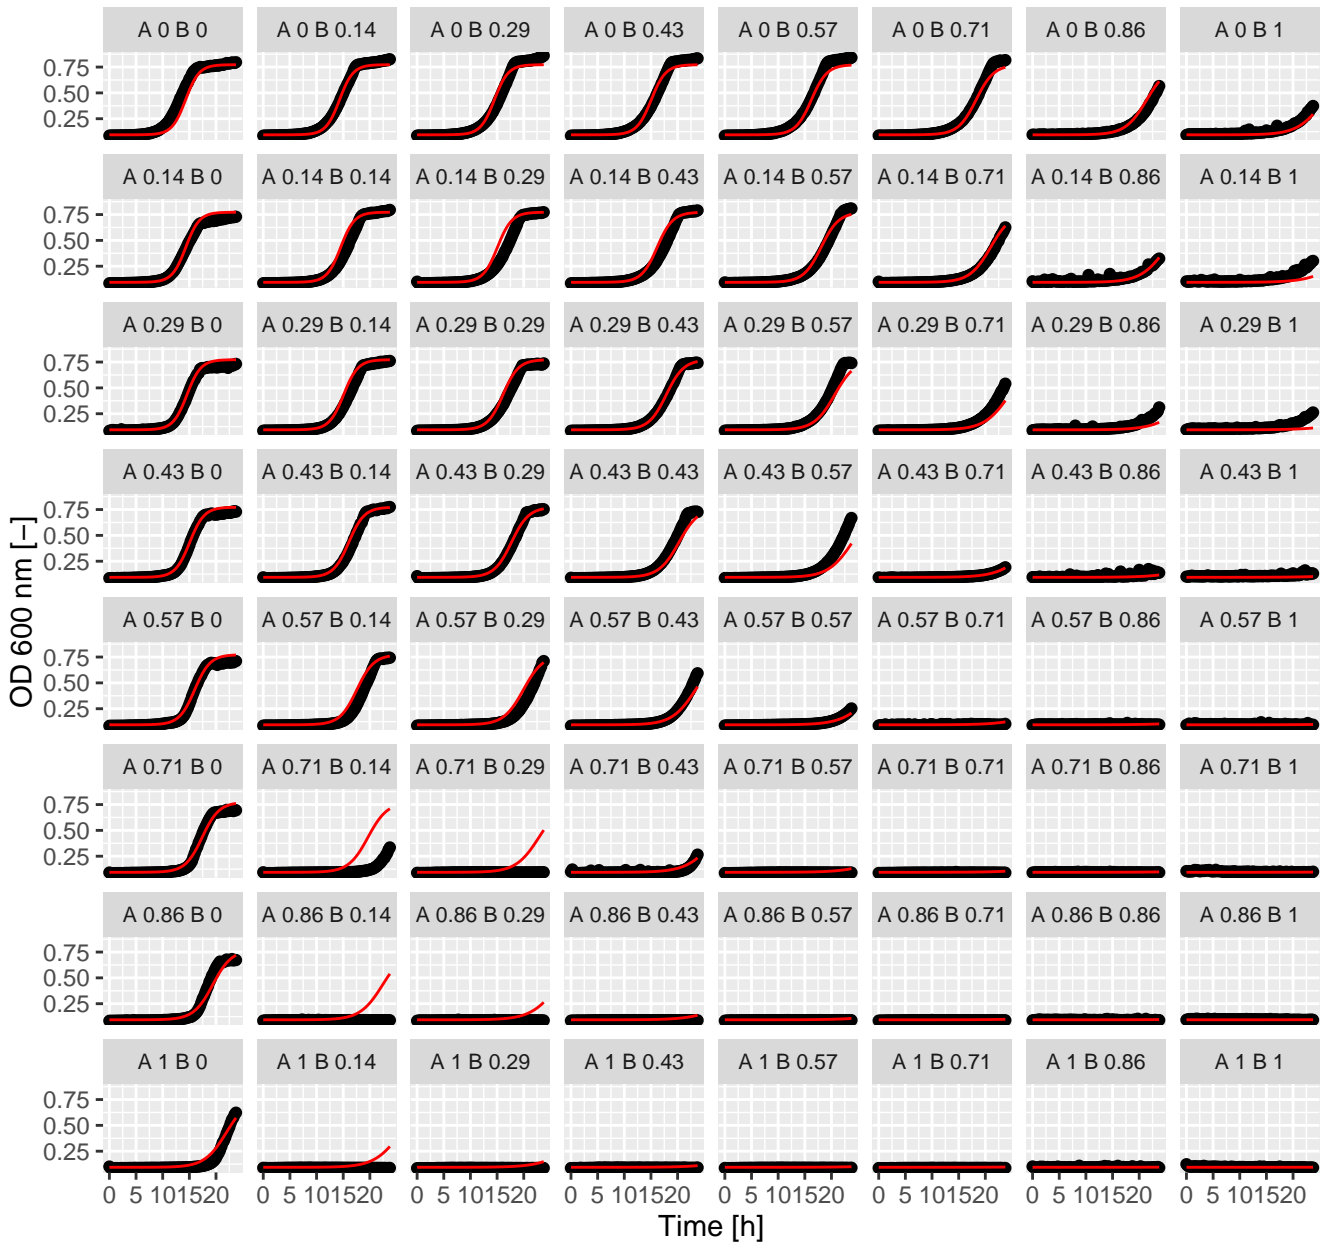

Dyc.Tac (= Ax.Bx) full GPD1  
Int\_AB = -0.25 and Int\_BA = 1.02 at EC50

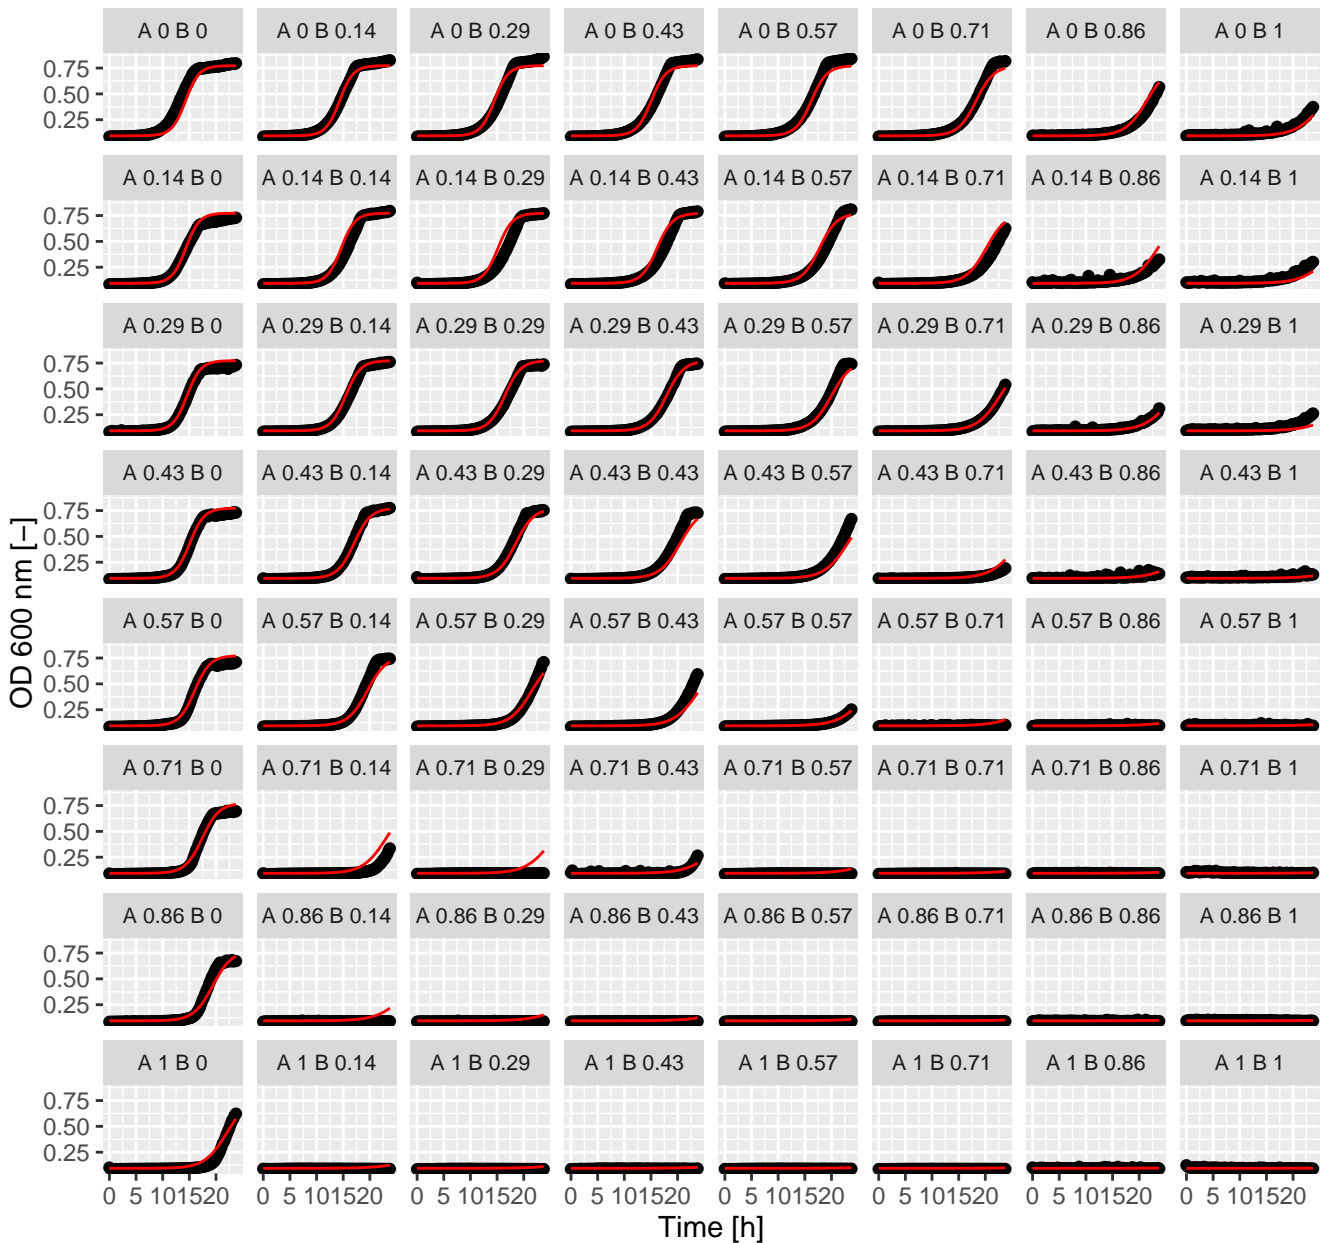

Dyc.Ter (= Ax.Bx) exp. additivity (LA)  
Int\_AB = 0 and Int\_BA = 0 at EC50

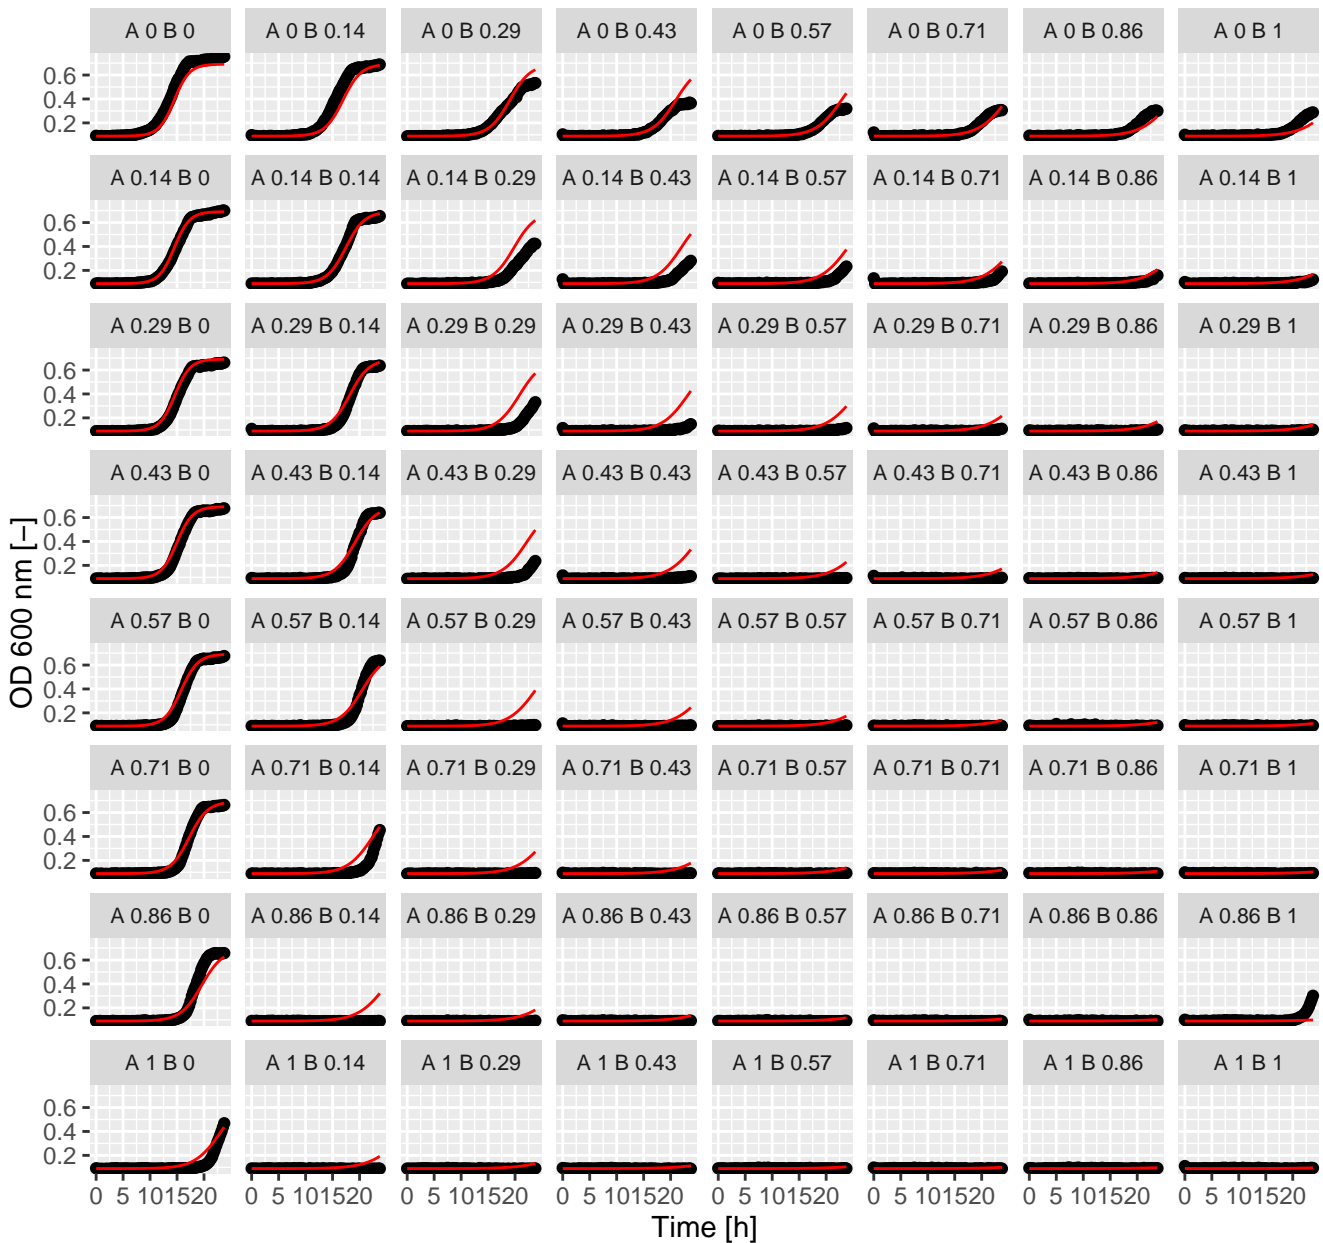

Dyc.Ter (= Ax.Bx) full GPDI  
 Int\_AB = -0.5 and Int\_BA = -0.23 at EC50

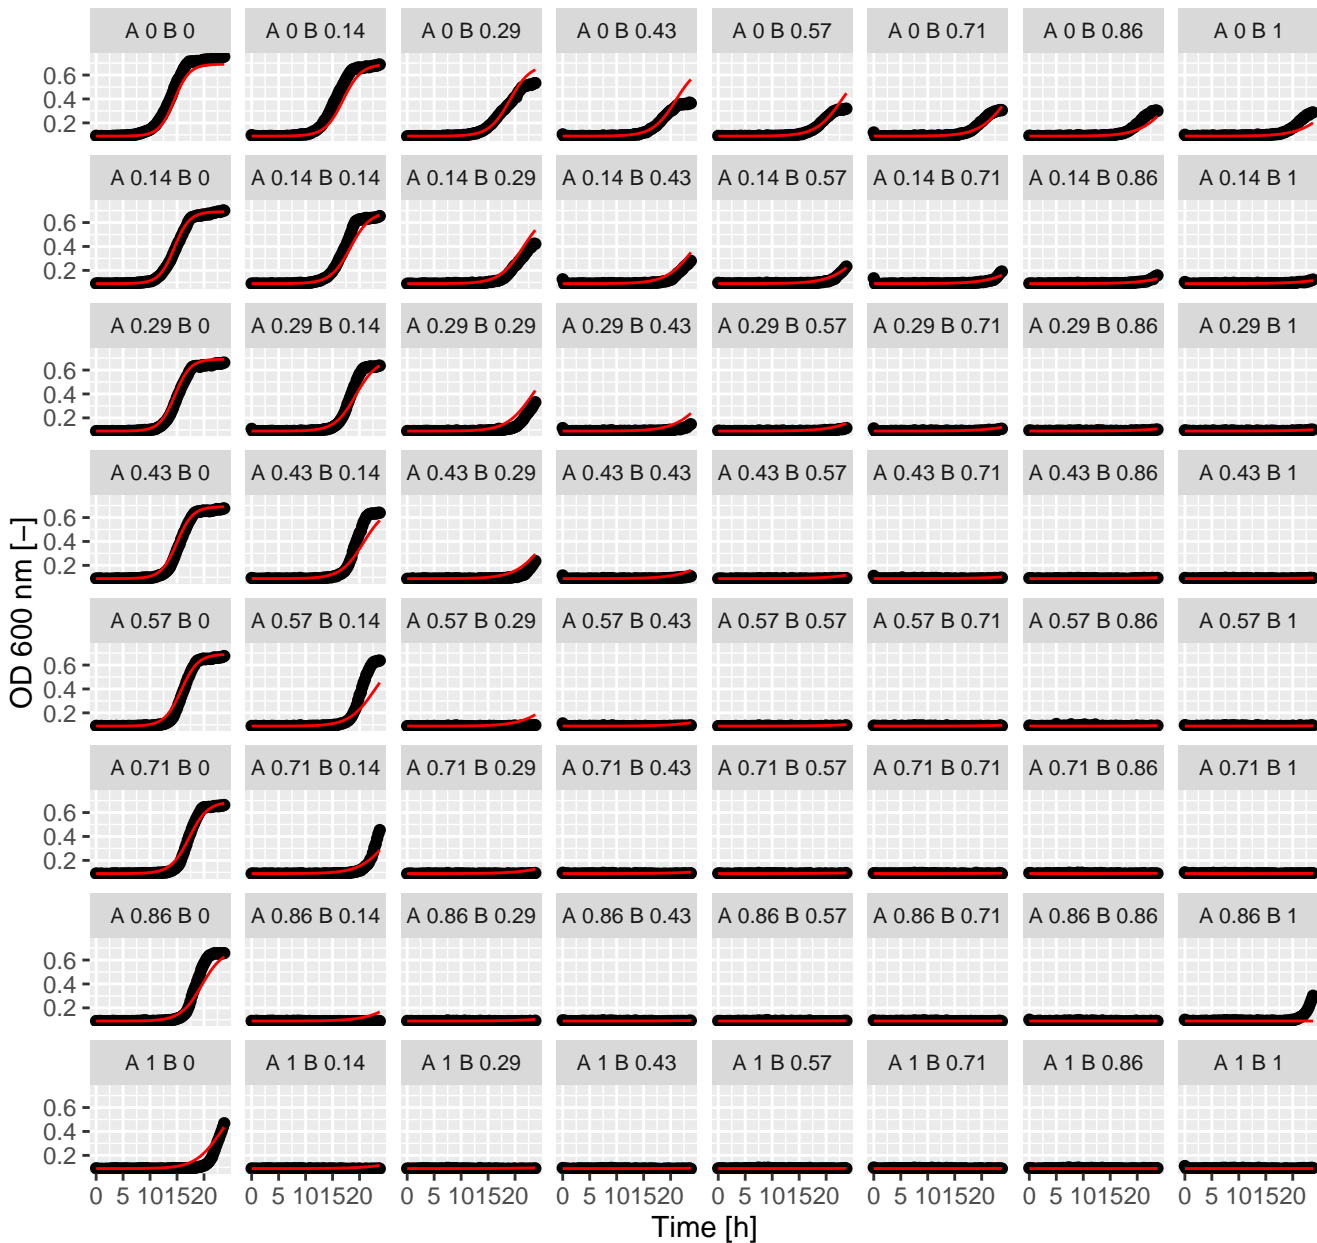



Dyc.Tun (= Ax.Bx) exp. additivity (LA)  
Int\_AB = 0 and Int\_BA = 0 at EC50

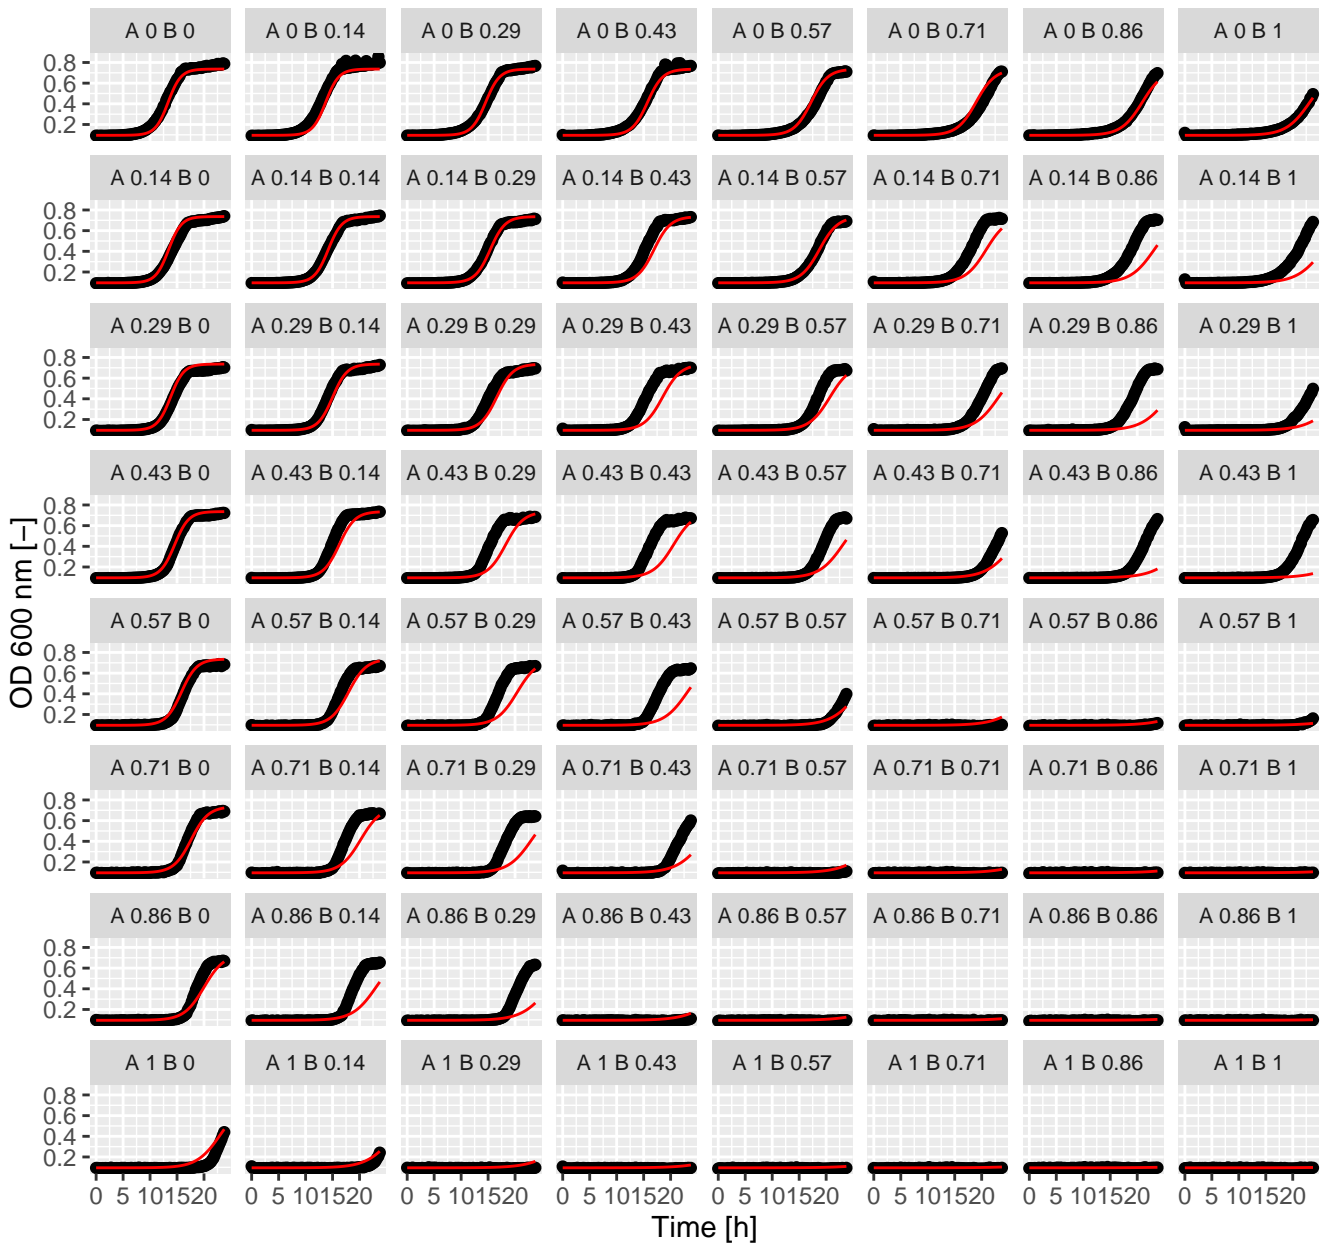

Dyc.Tun (= Ax.Bx) full GPDI  
Int\_AB = 0.1 and Int\_BA = 0.39 at EC50

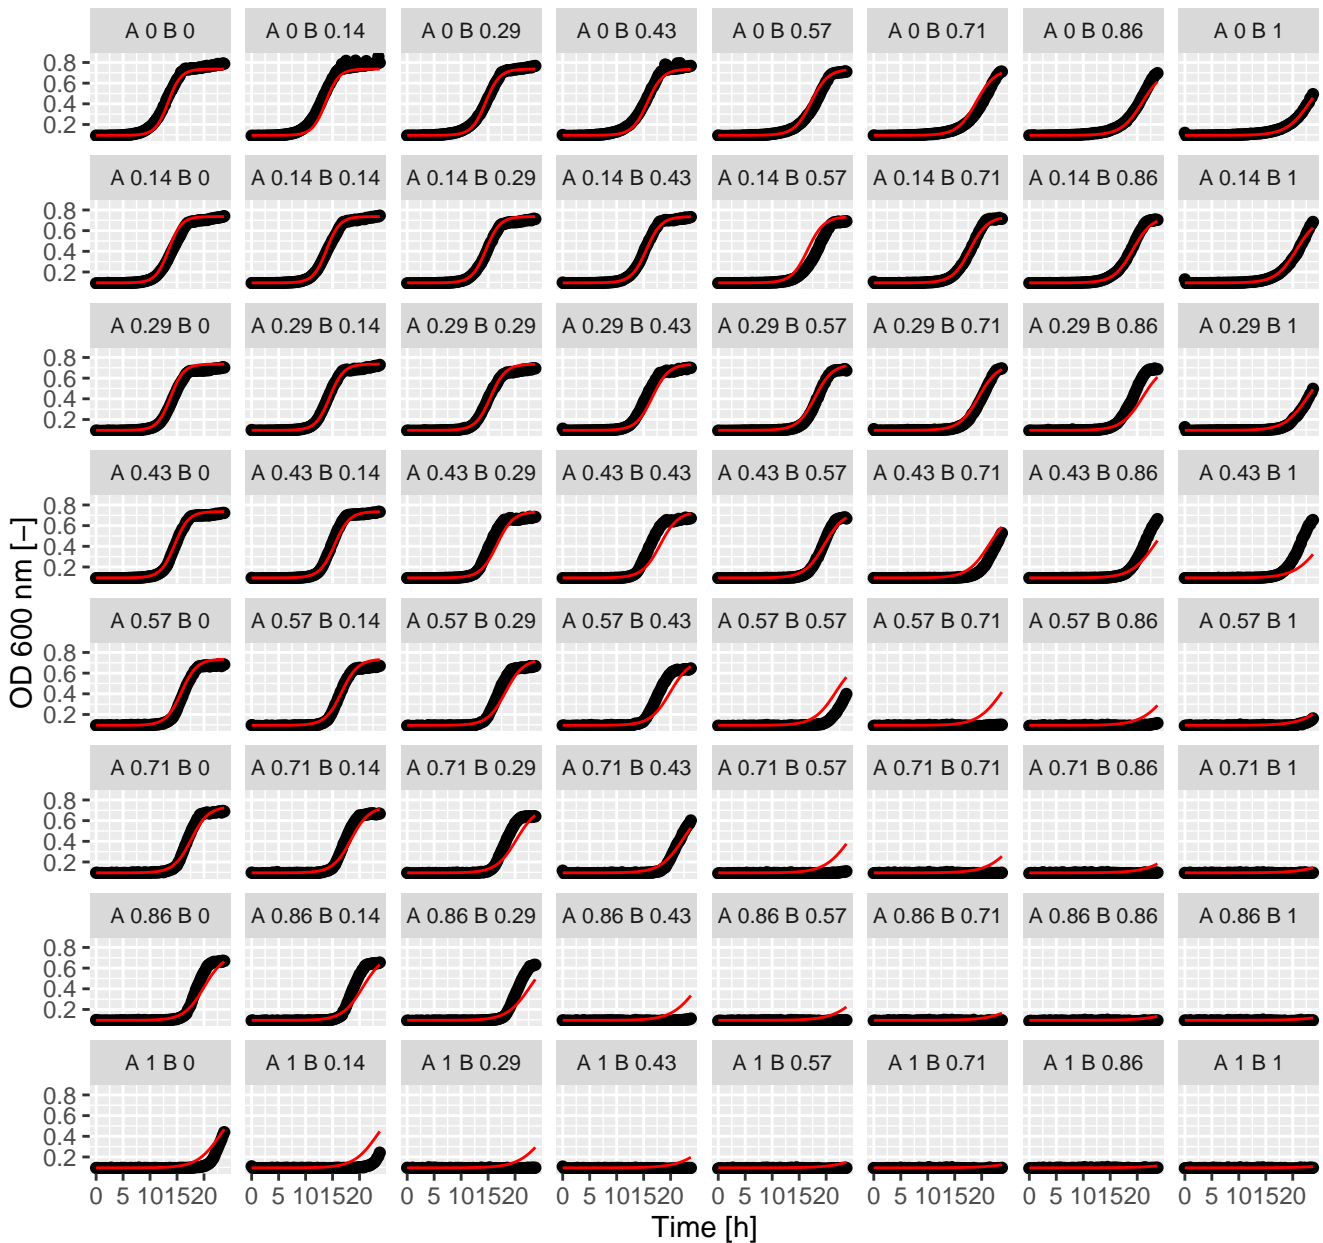

Fen.Fen (= Ax.Bx) exp. additivity (LA)  
Int\_AB = 0 and Int\_BA = 0 at EC50

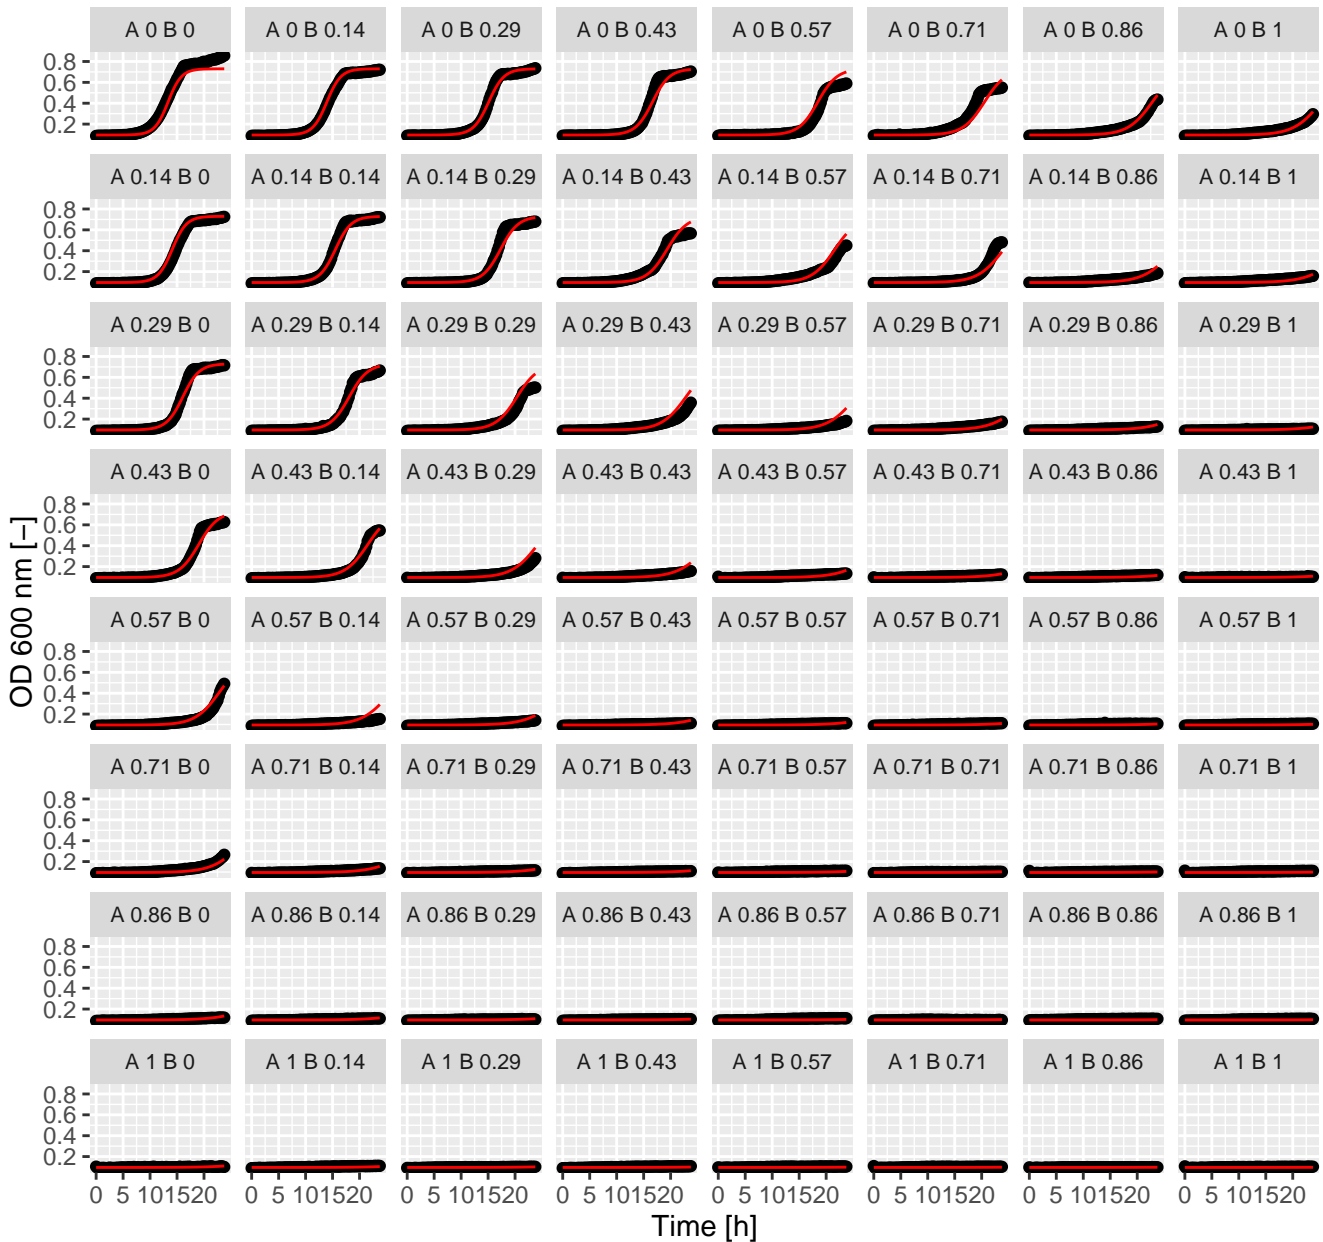

Fen.Fen (= Ax.Bx) full GPDI  
Int\_AB = -0.45 and Int\_BA = 0.28 at EC50

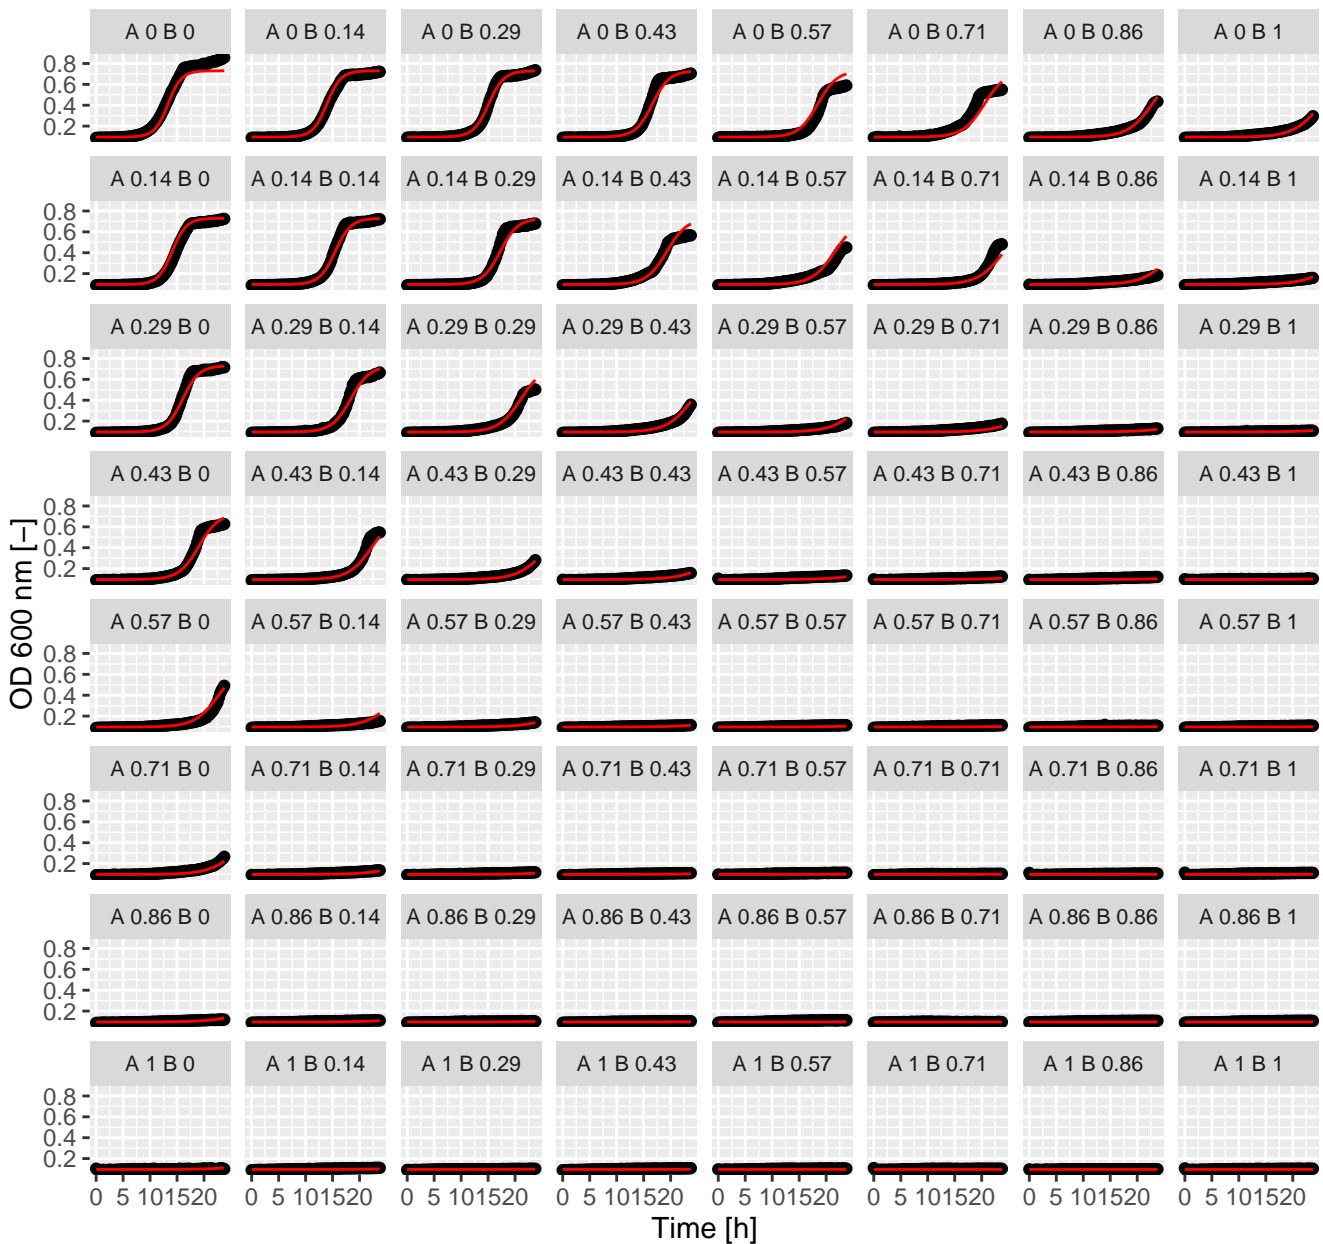

Fen.Hal (= Ax.Bx) exp. additivity (LA)  
Int\_AB = 0 and Int\_BA = 0 at EC50

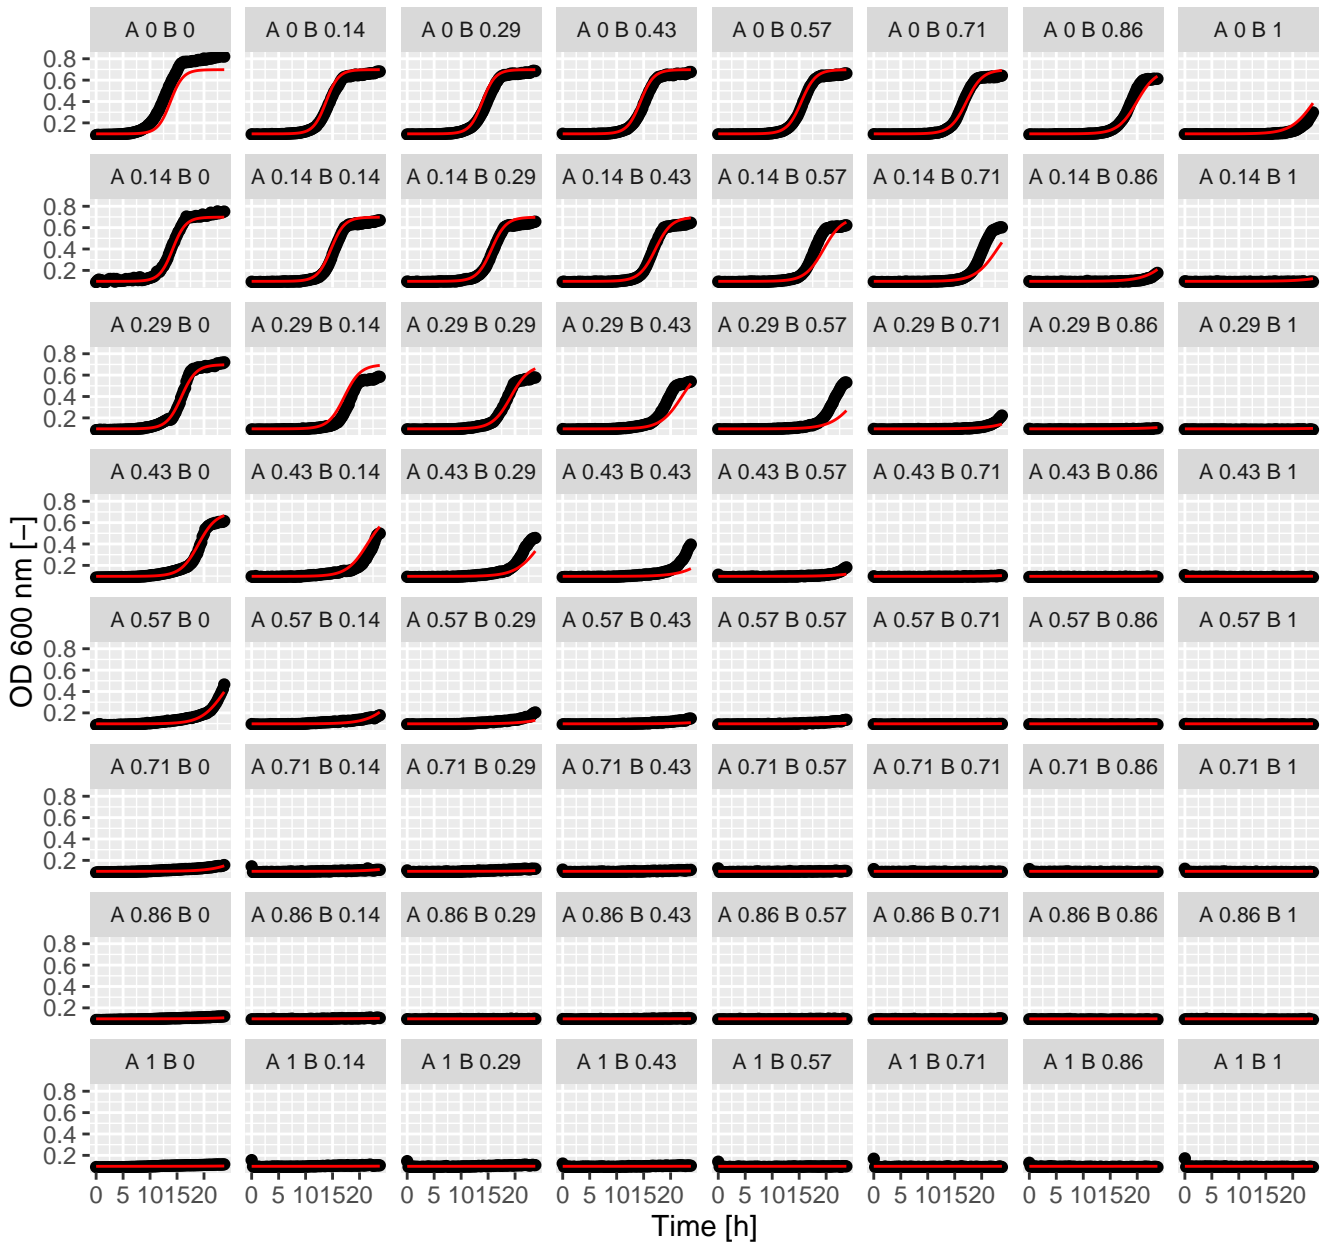

Fen.Hal (= Ax.Bx) full GPDI  
 Int\_AB = -0.04 and Int\_BA = 0.49 at EC50

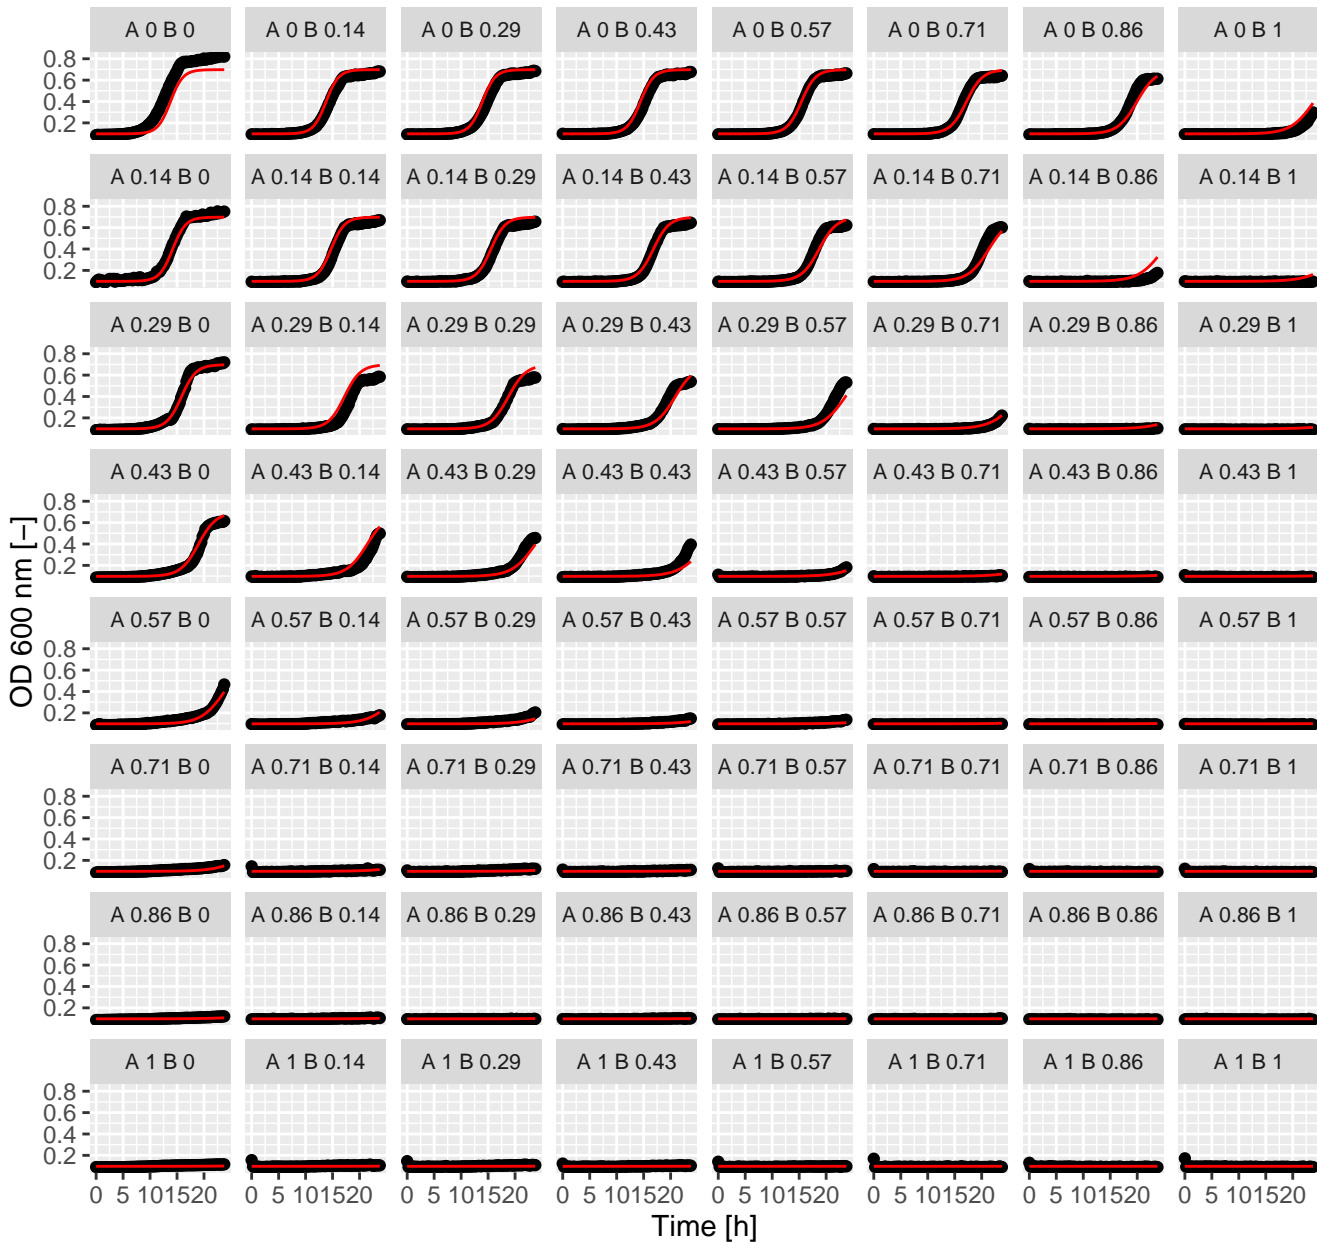

Fen.Lat (= Ax.Bx) exp. additivity (LA)  
Int\_AB = 0 and Int\_BA = 0 at EC50

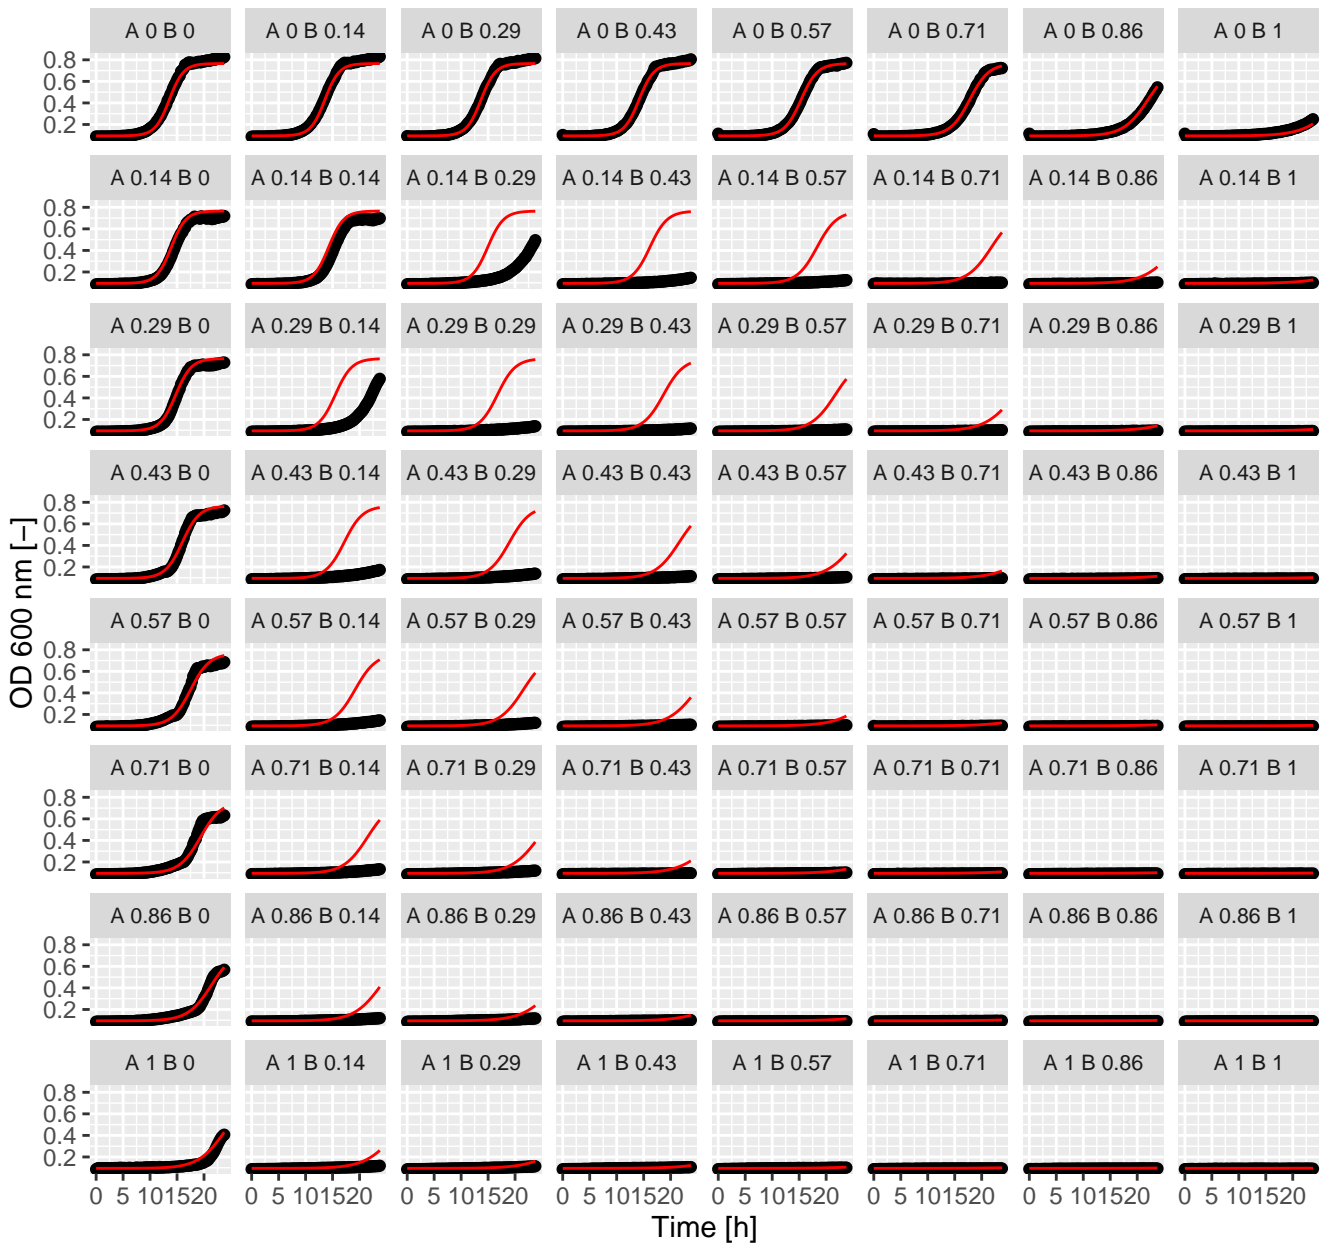

Fen.Lat (= Ax.Bx) full GPDI  
 Int\_AB = -0.23 and Int\_BA = -0.9 at EC50

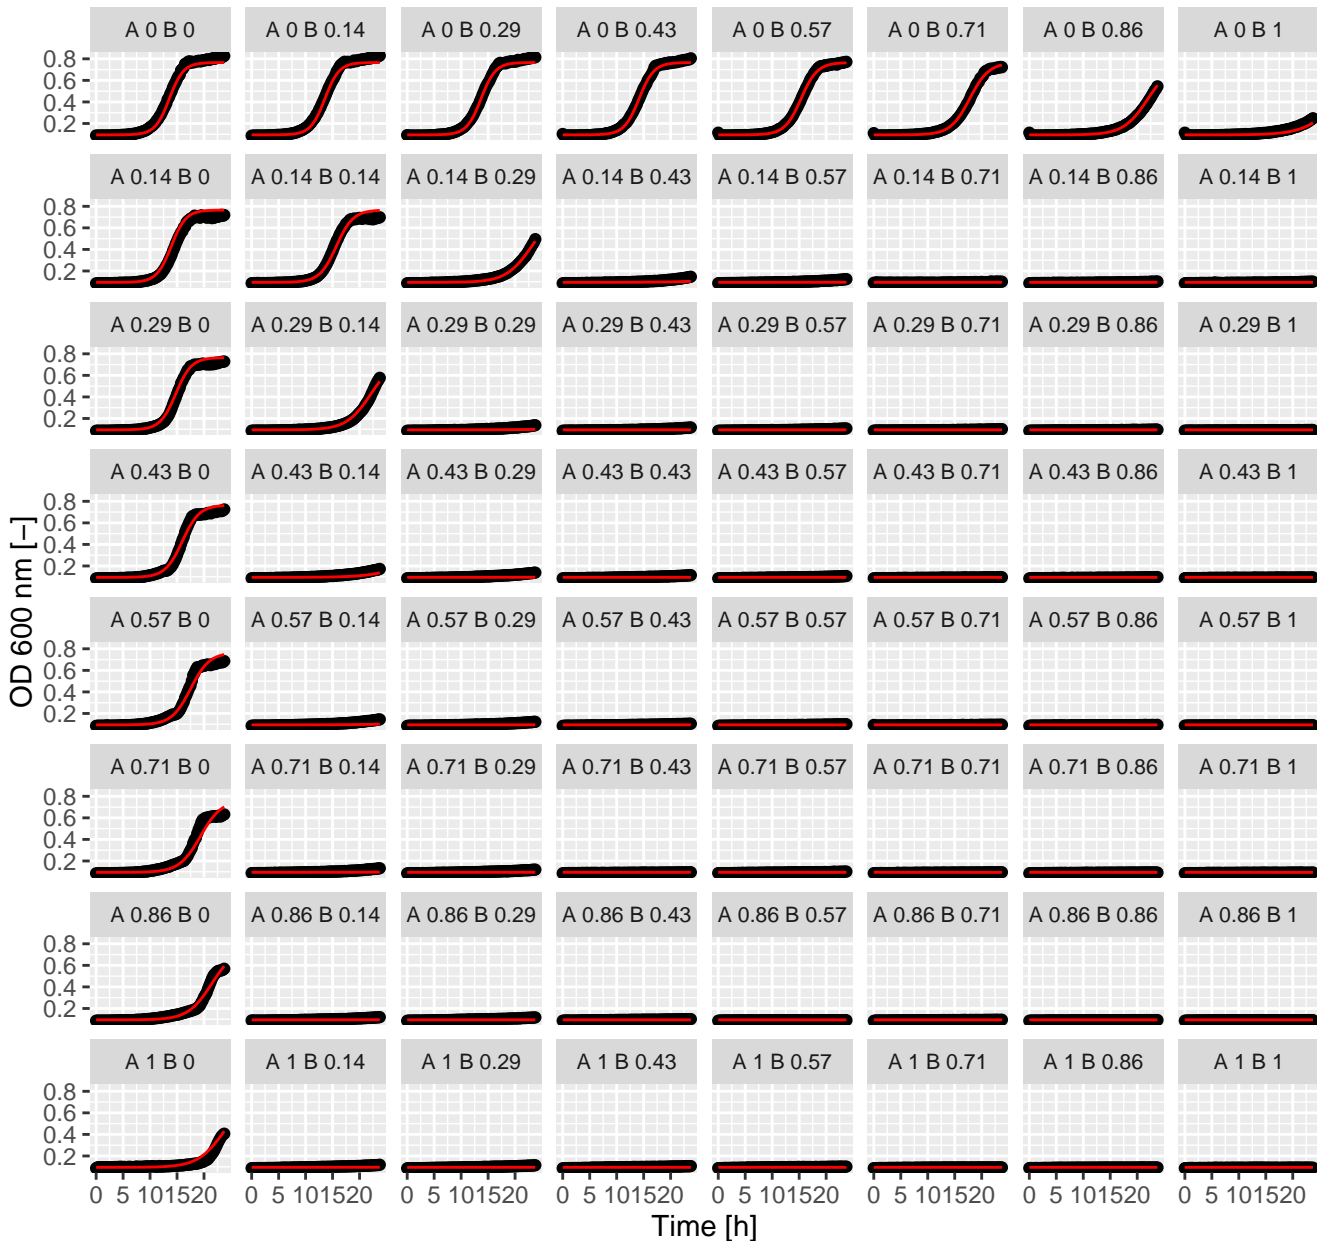



Fen.Pen (= Ax.Bx) exp. additivity (LA)  
Int\_AB = 0 and Int\_BA = 0 at EC50

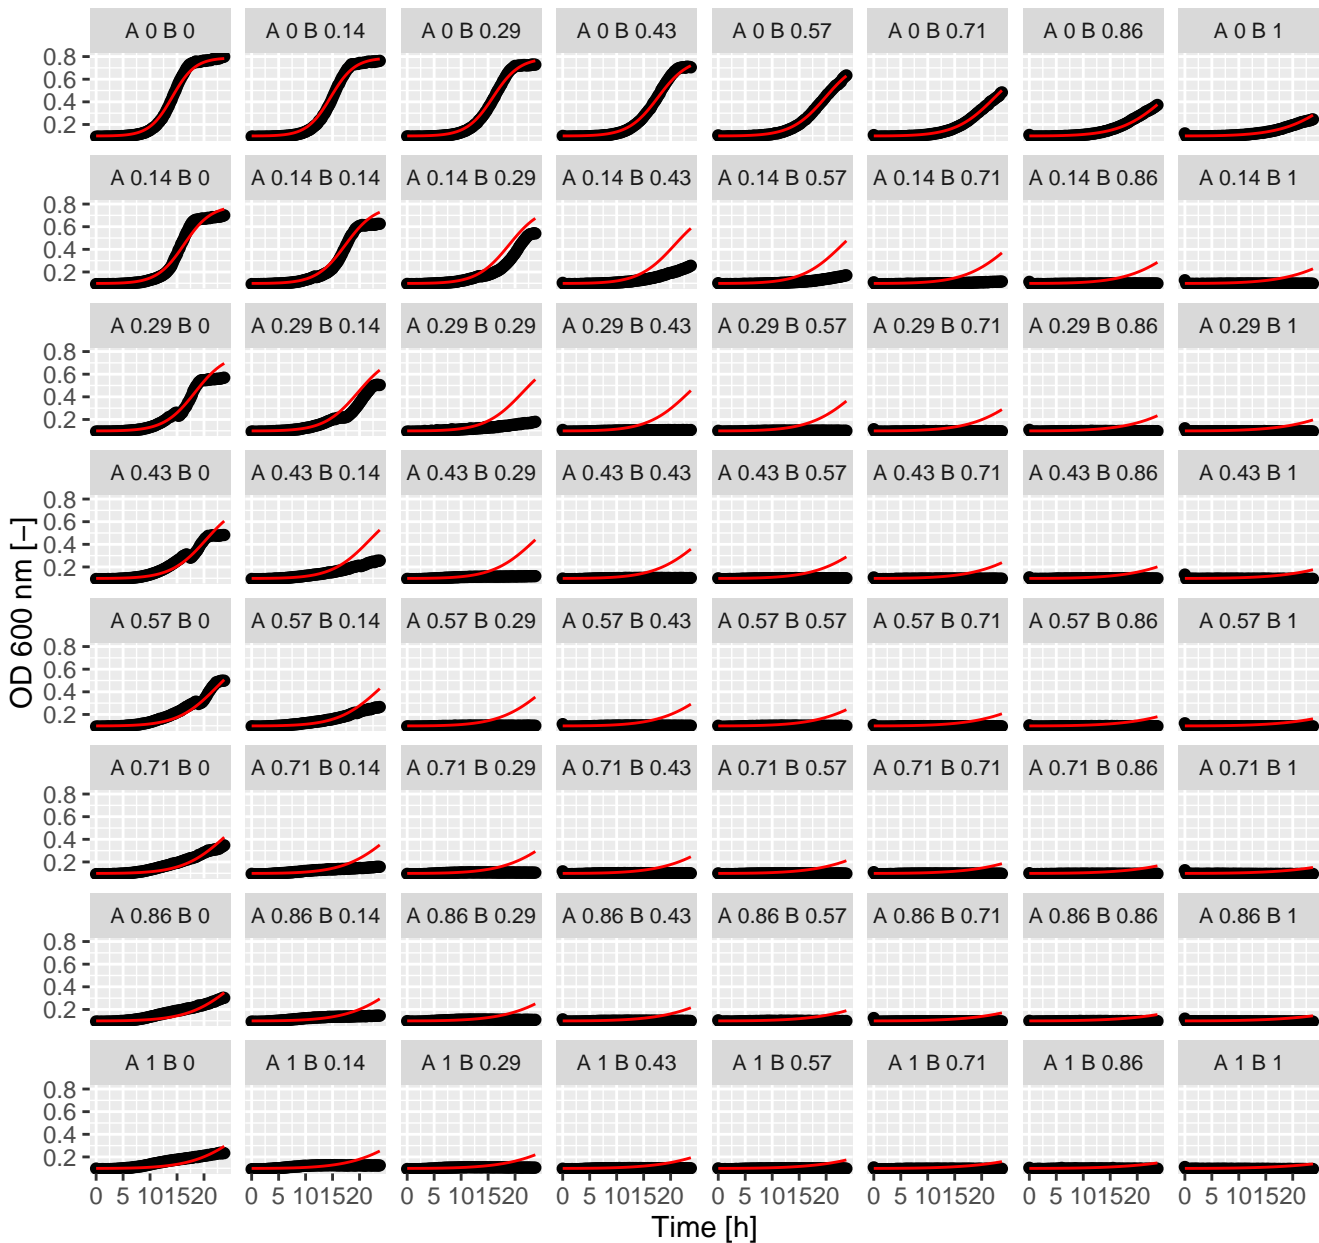

Fen.Pen (= Ax.Bx) full GPDI  
Int\_AB = 0.11 and Int\_BA = -0.83 at EC50

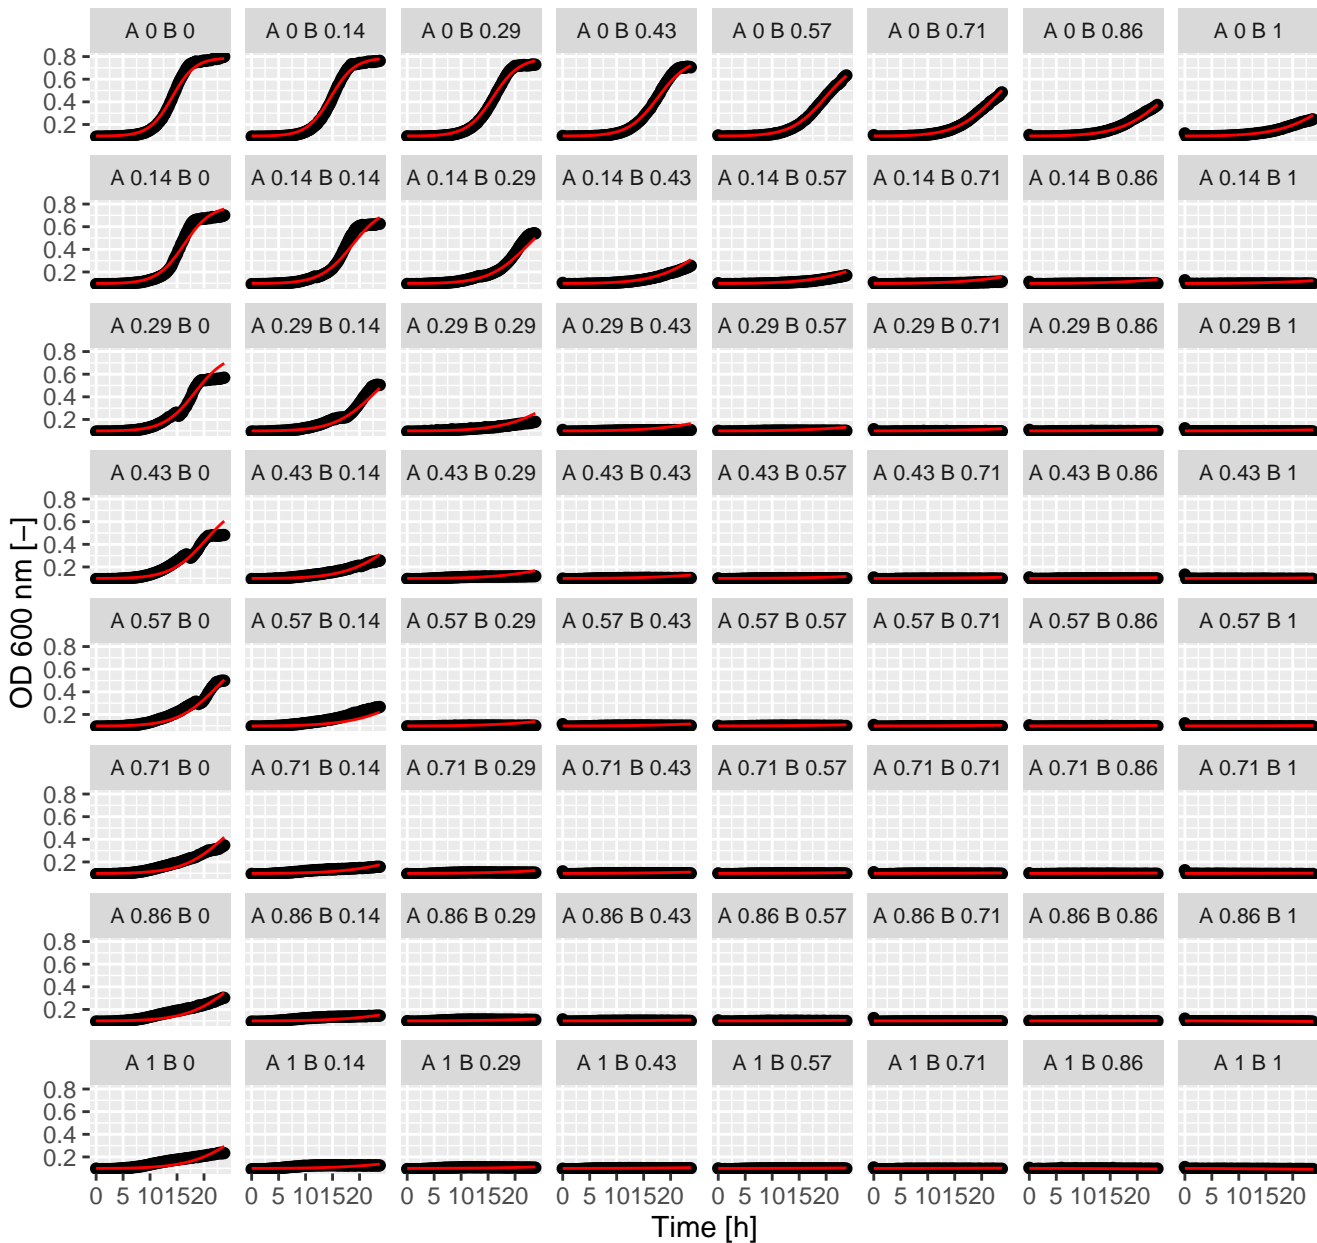

Fen.Rap (= Ax.Bx) exp. additivity (LA)  
 Int\_AB = 0 and Int\_BA = 0 at EC50

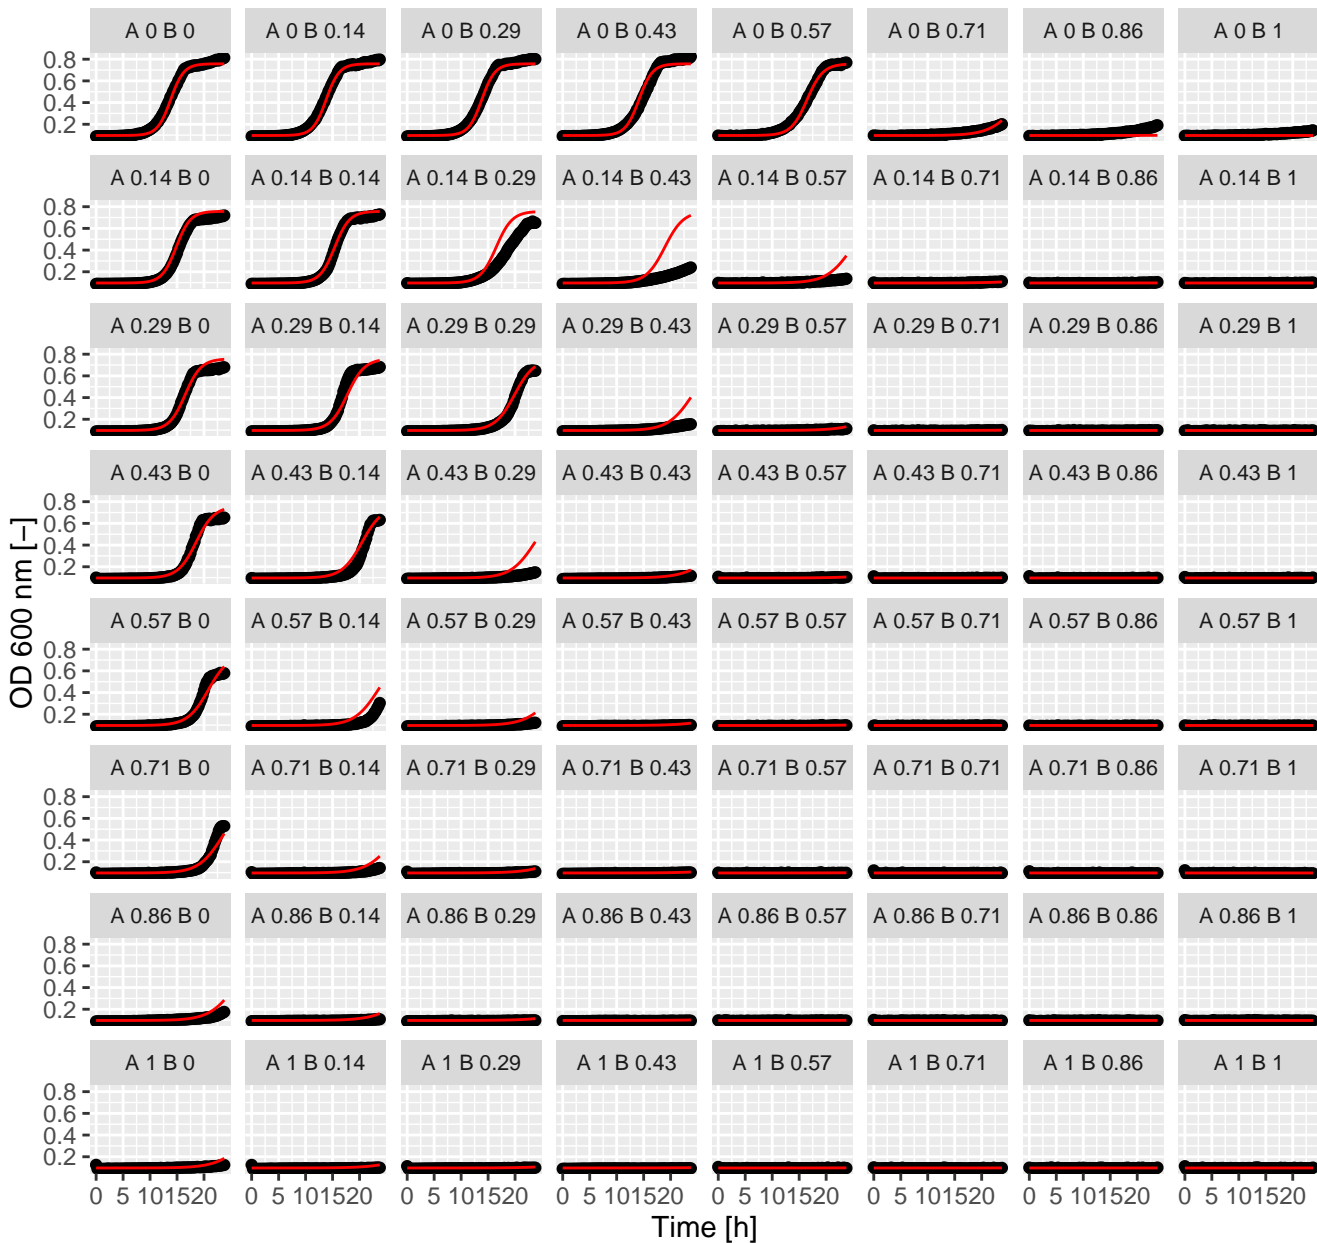

Fen.Rap (= Ax.Bx) full GPDl  
 Int\_AB = -0.11 and Int\_BA = -0.23 at EC50

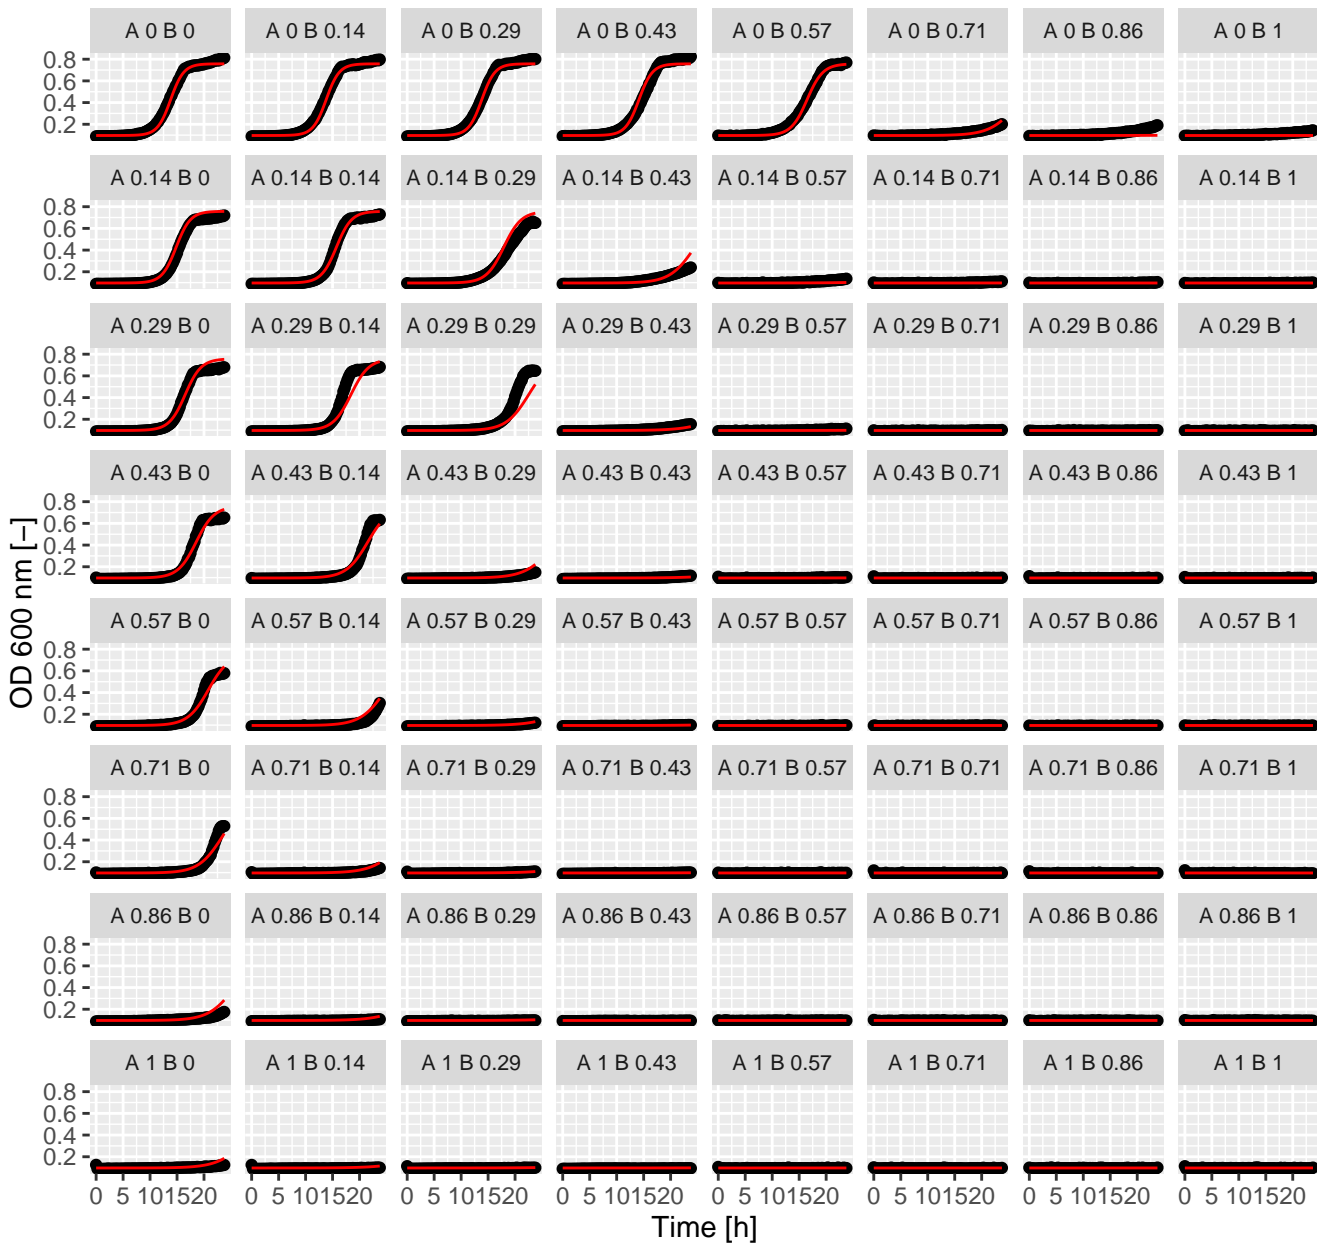

Fen.Sta (= Ax.Bx) exp. additivity (LA)  
Int\_AB = 0 and Int\_BA = 0 at EC50

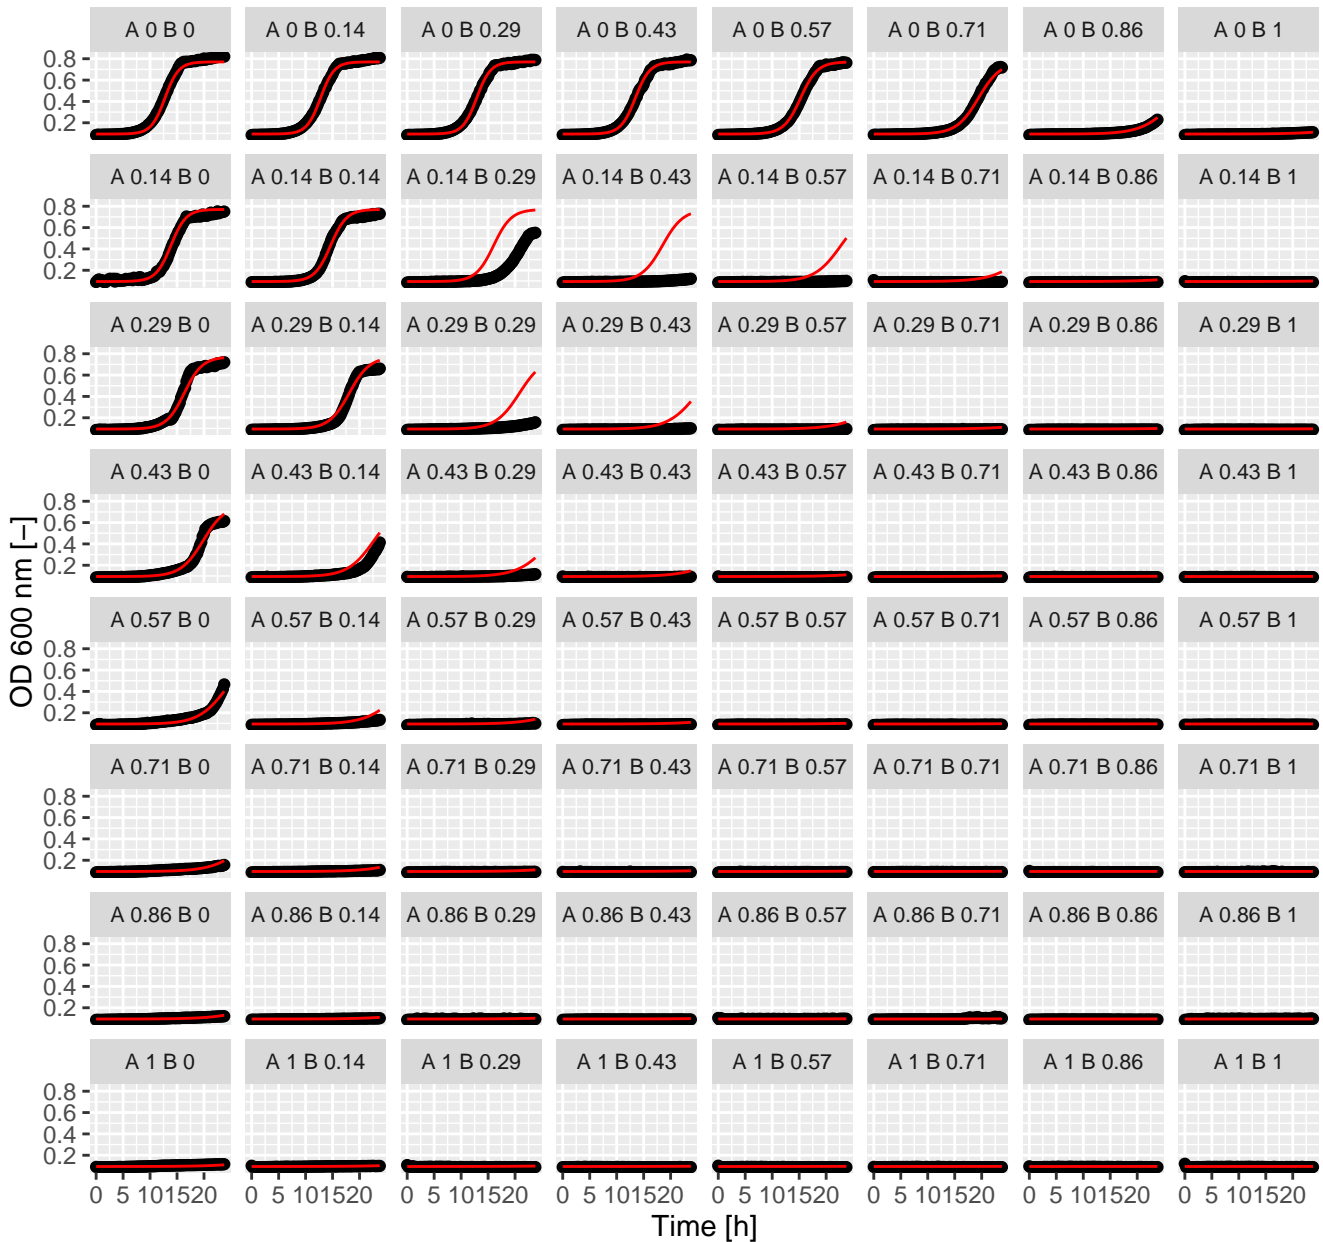

Fen.Sta (= Ax.Bx) full GPDI  
 Int\_AB = -0.53 and Int\_BA = -0.29 at EC50

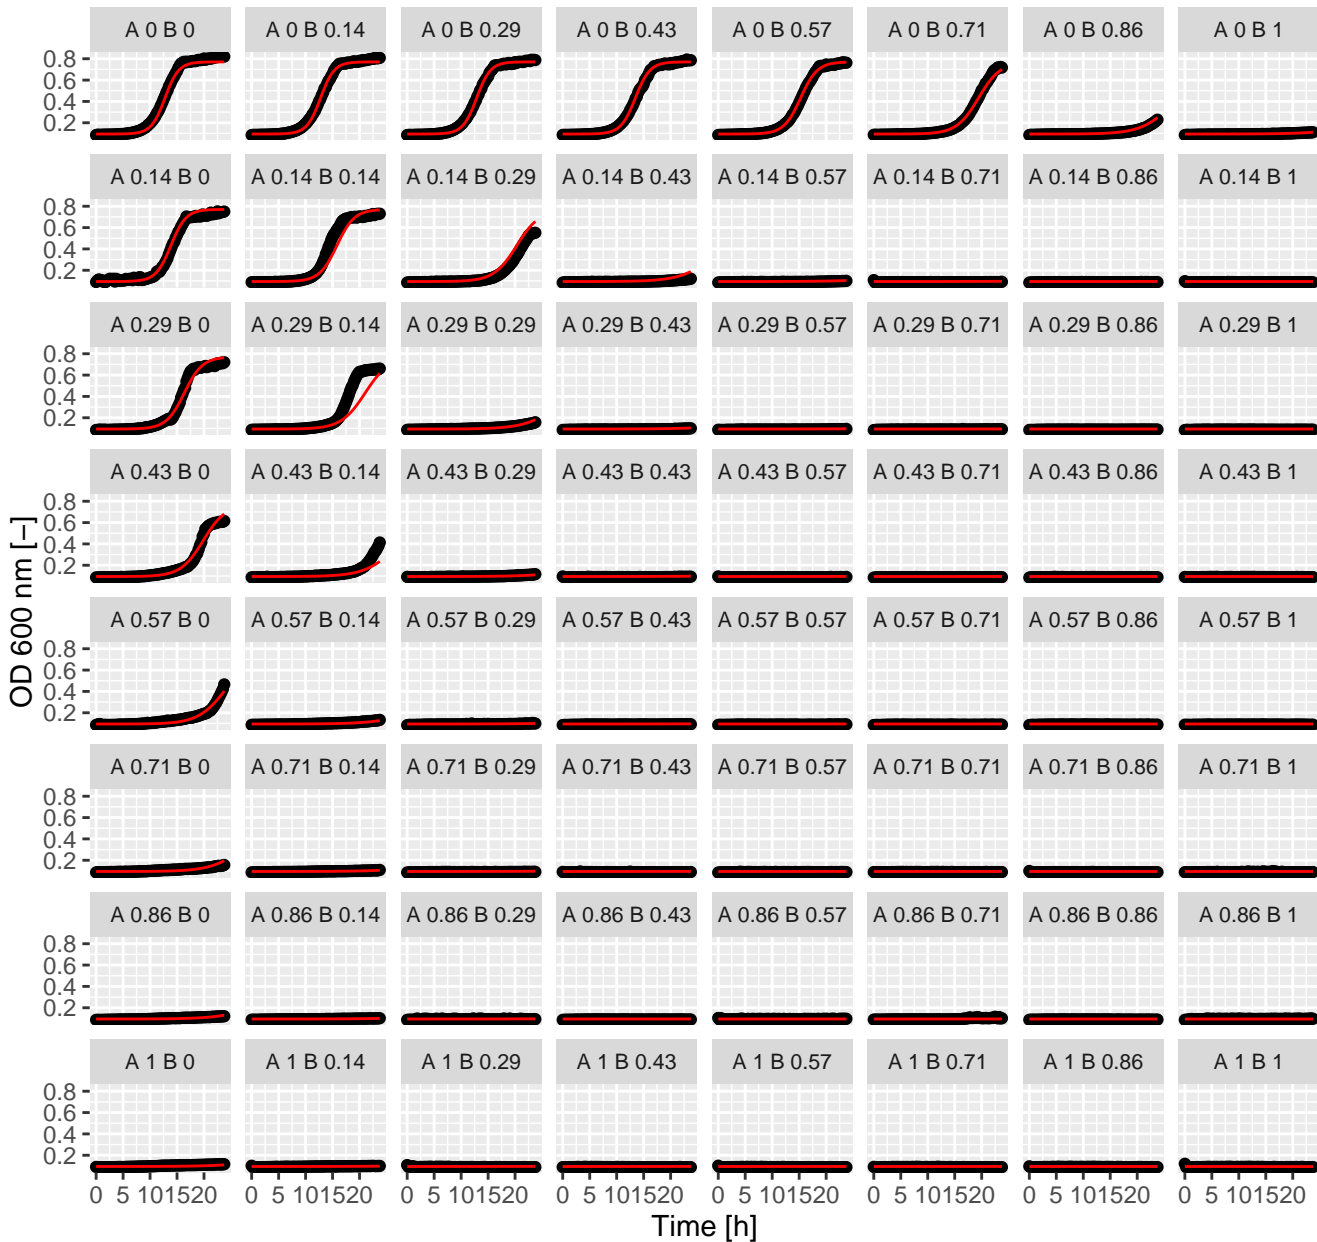

Fen.Tac (= Ax.Bx) exp. additivity (LA)  
 Int\_AB = 0 and Int\_BA = 0 at EC50

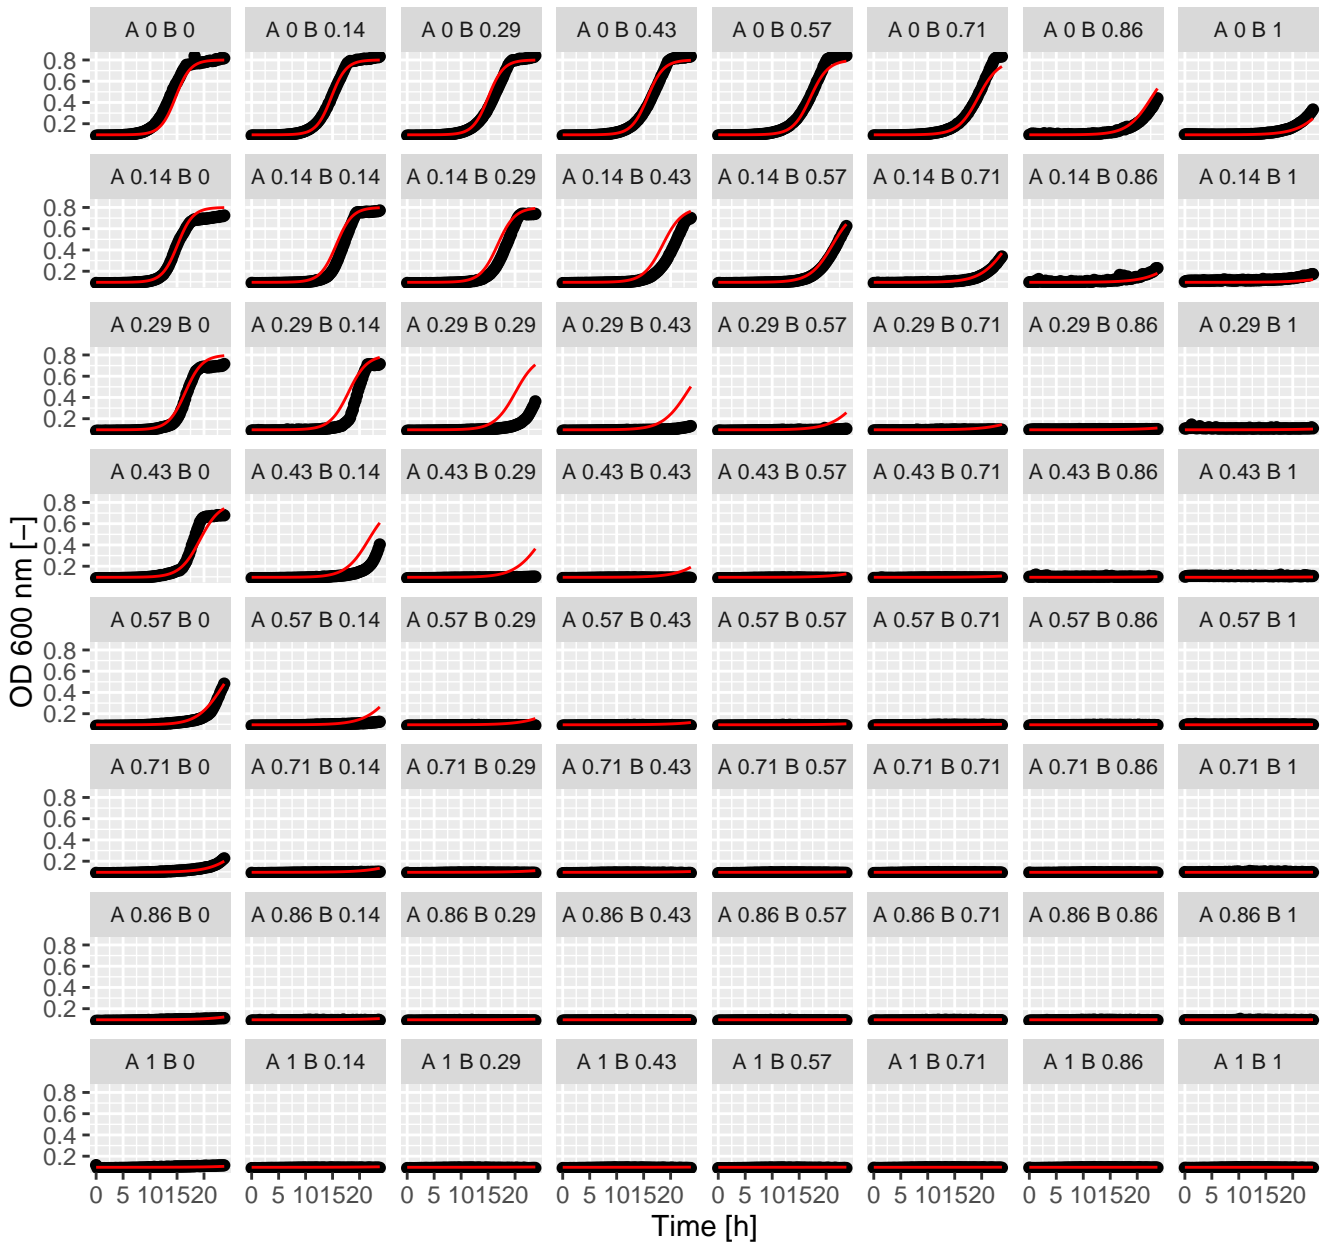

Fen.Tac (= Ax.Bx) full GPDI  
Int\_AB = -0.64 and Int\_BA = 3.54 at EC50

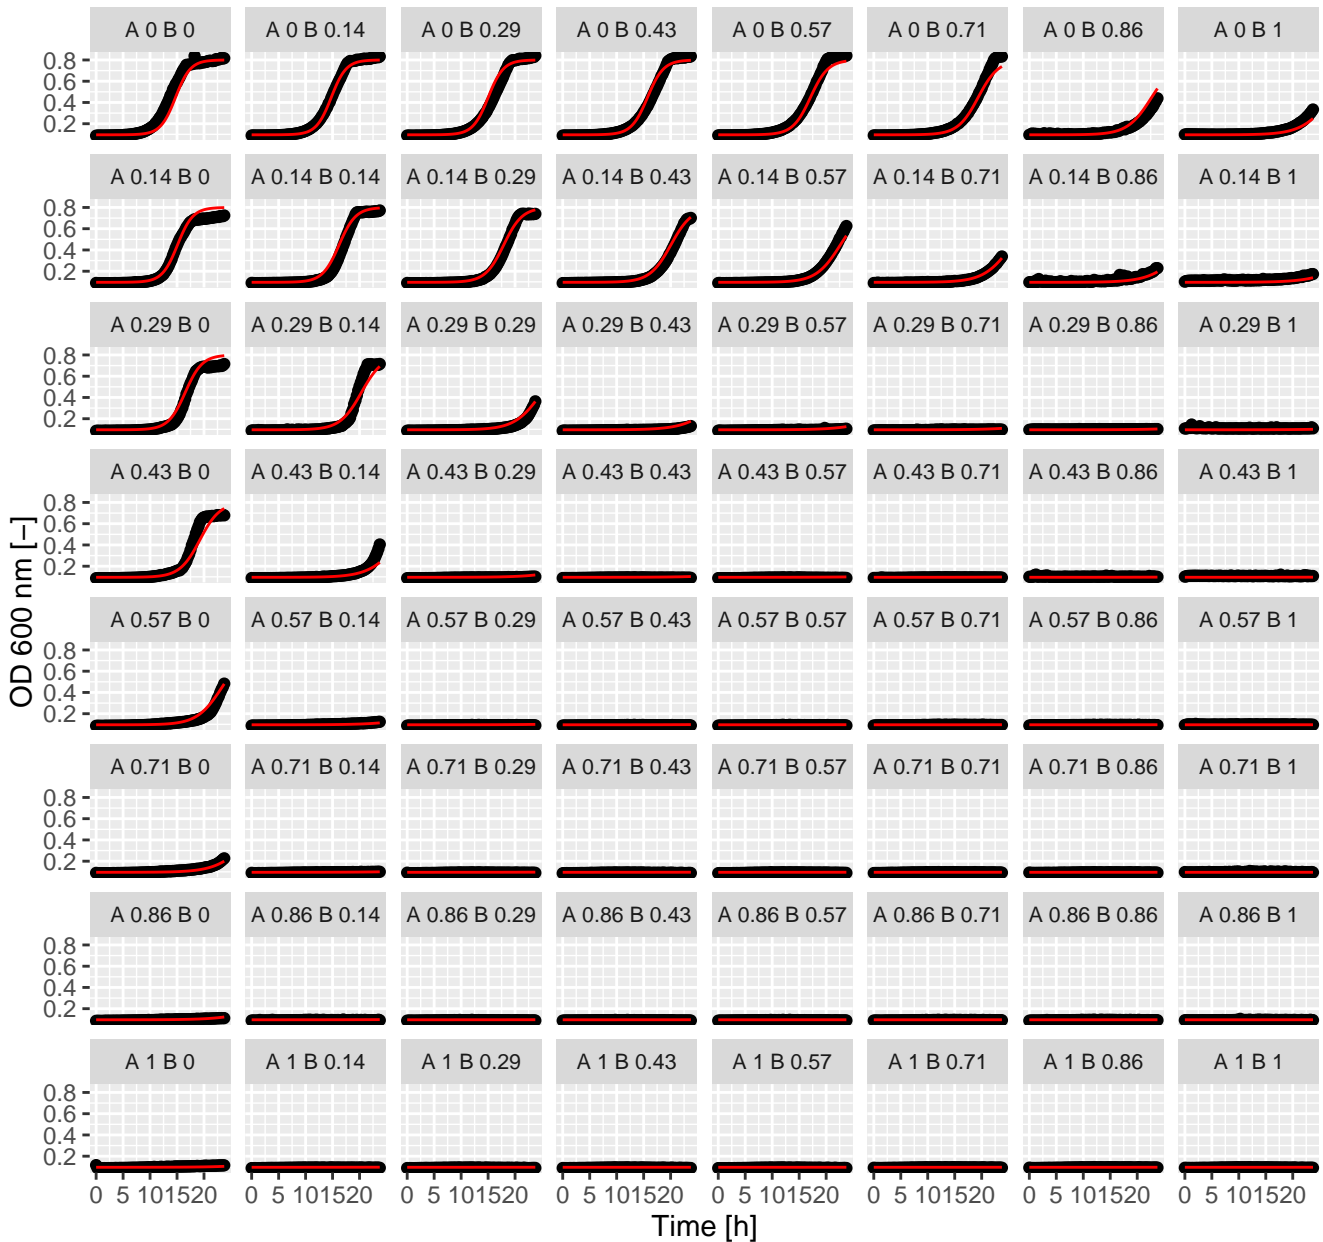



Fen.Ter (= Ax.Bx) exp. additivity (LA)  
Int\_AB = 0 and Int\_BA = 0 at EC50

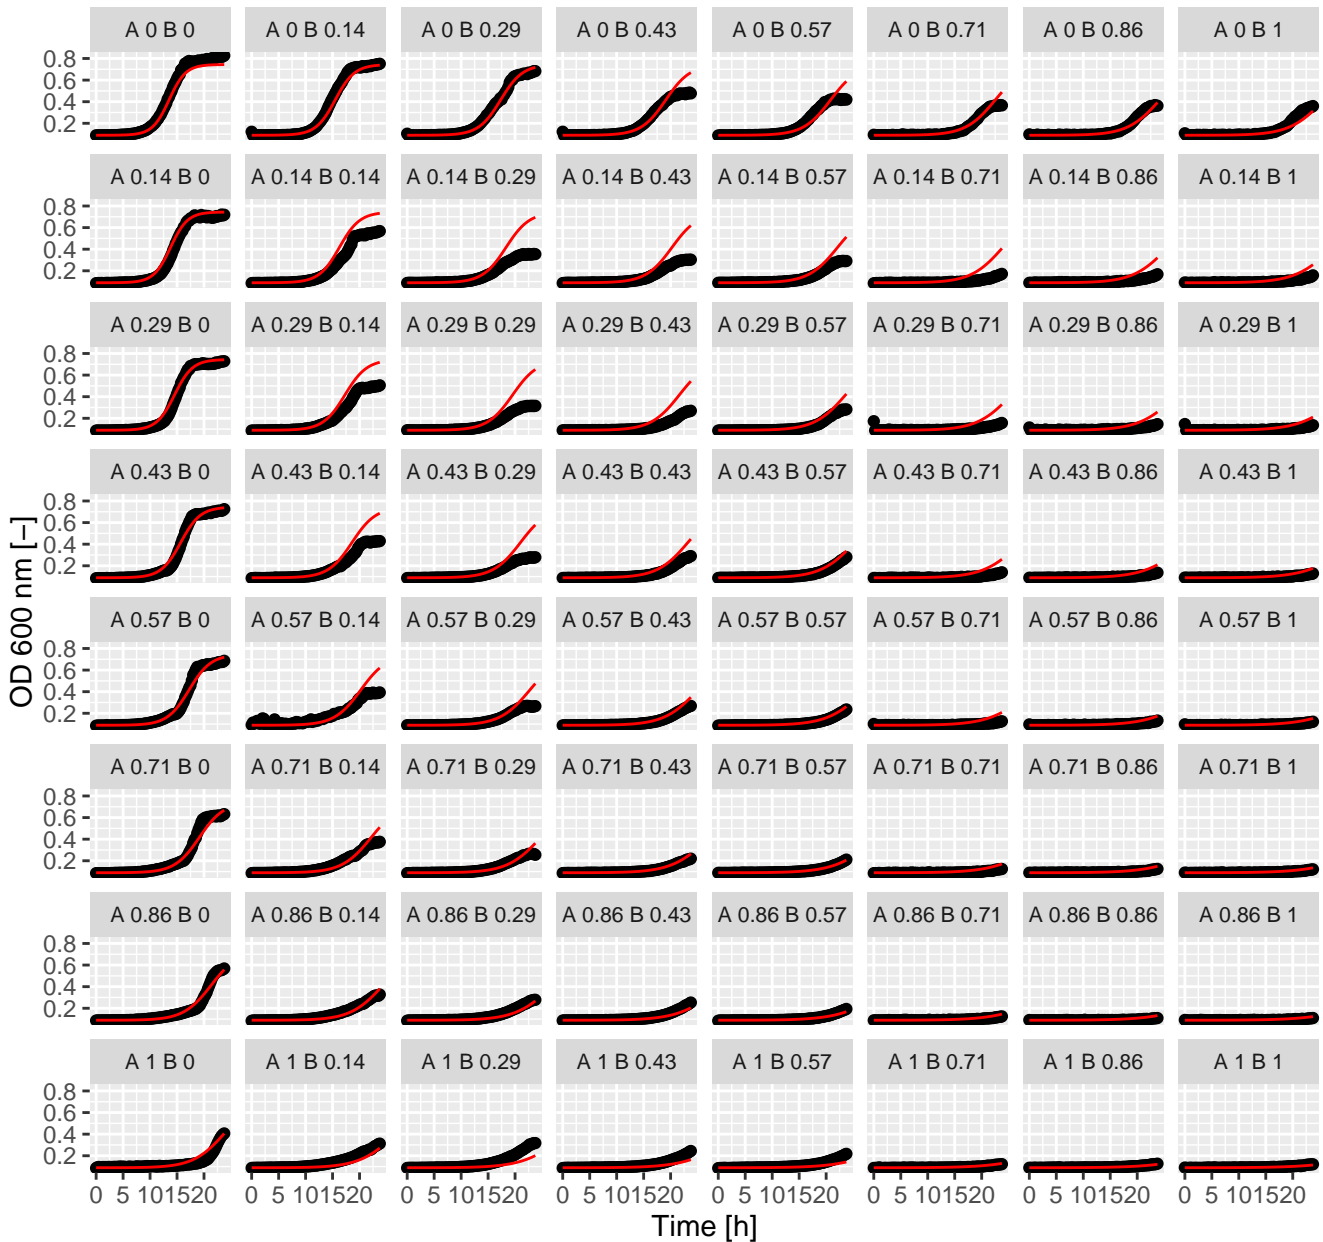

Fen.Ter (= Ax.Bx) full GPDI  
 Int\_AB = 0.32 and Int\_BA = -0.49 at EC50

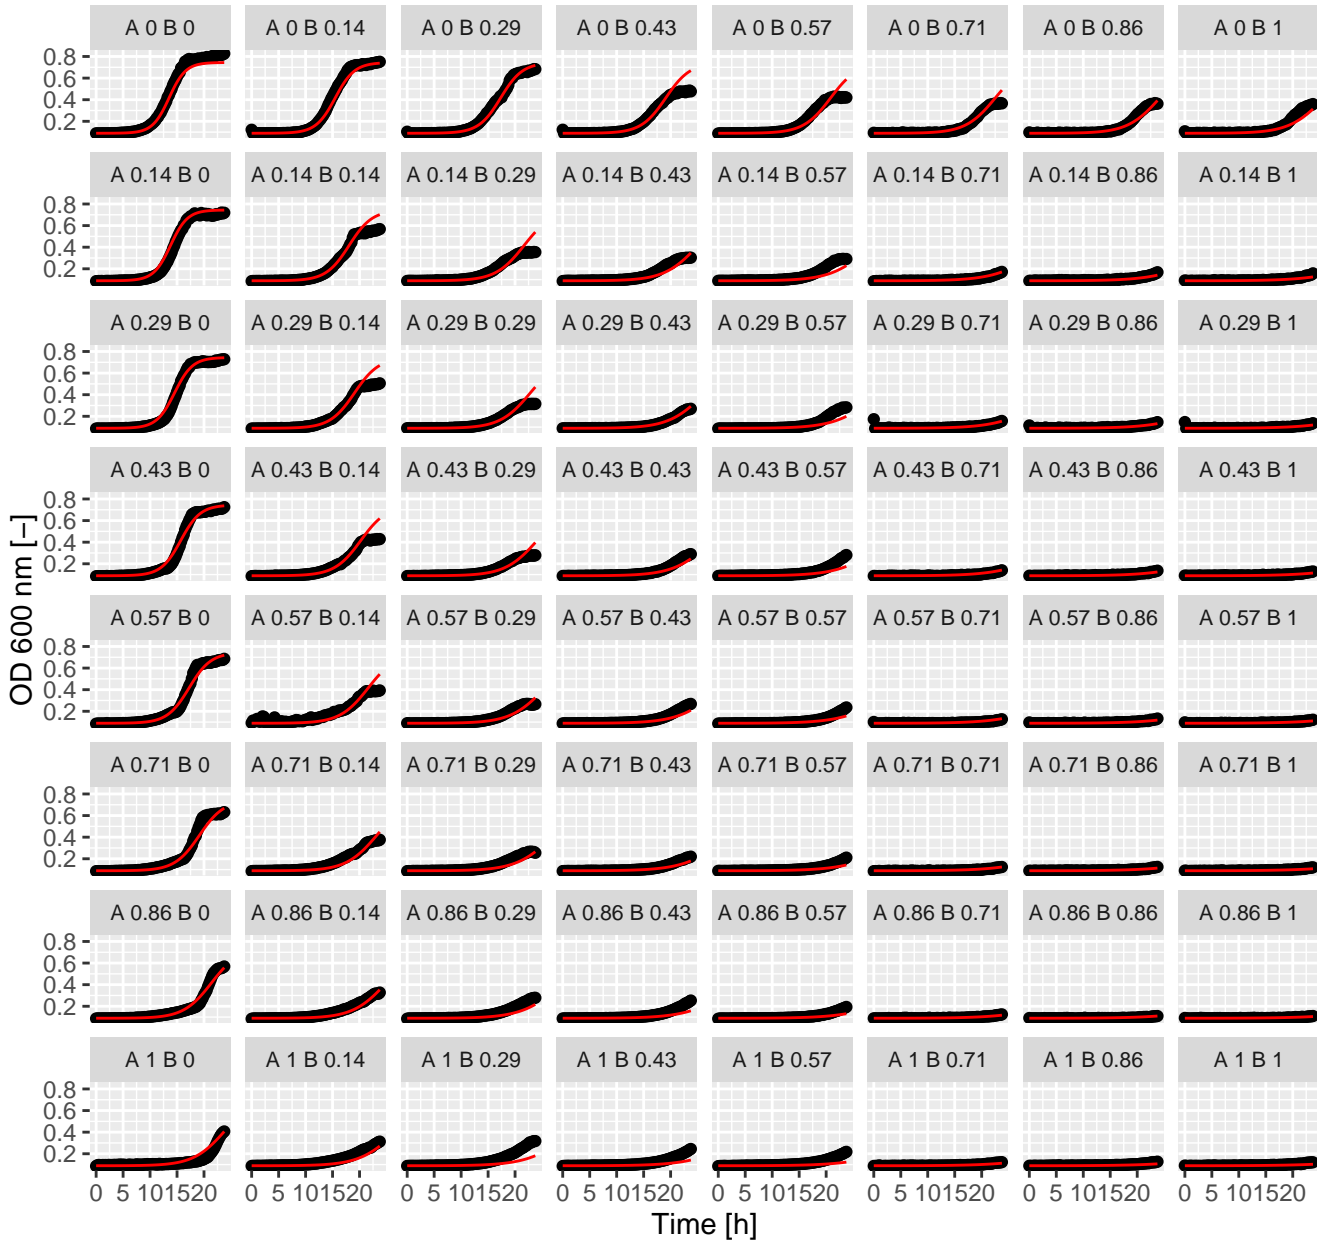

Fen.Tun (= Ax.Bx) exp. additivity (LA)  
Int\_AB = 0 and Int\_BA = 0 at EC50

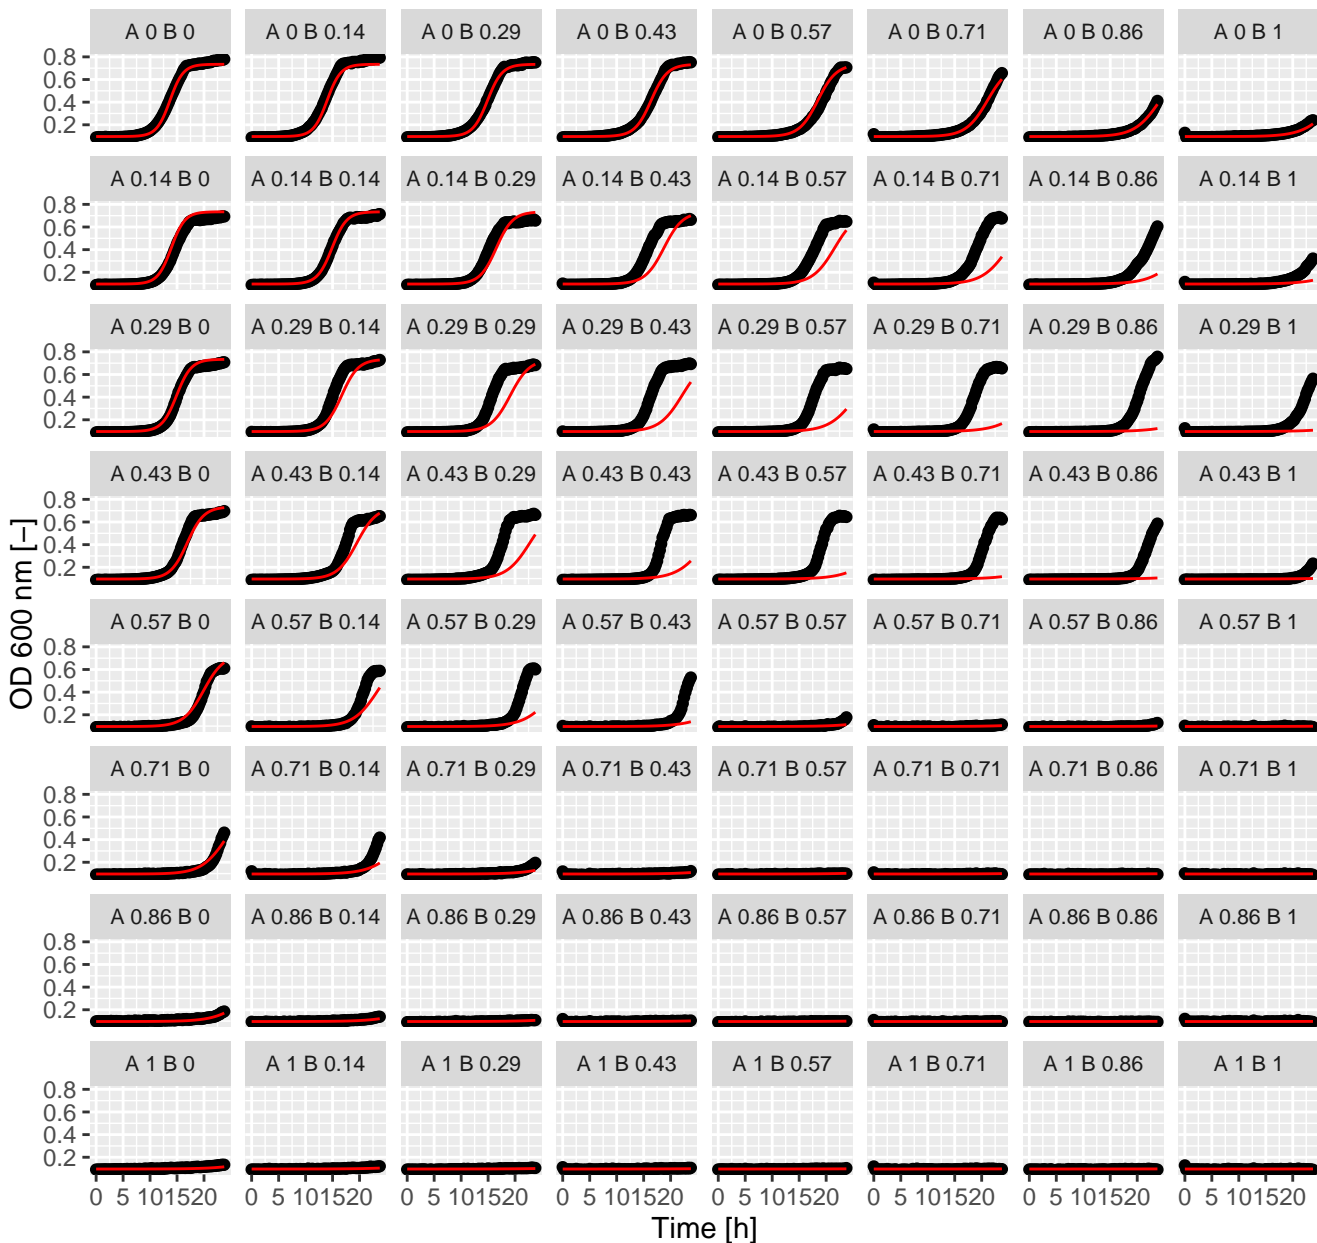

Fen.Tun (= Ax.Bx) full GPDI  
Int\_AB = -0.04 and Int\_BA = 3.43 at EC50

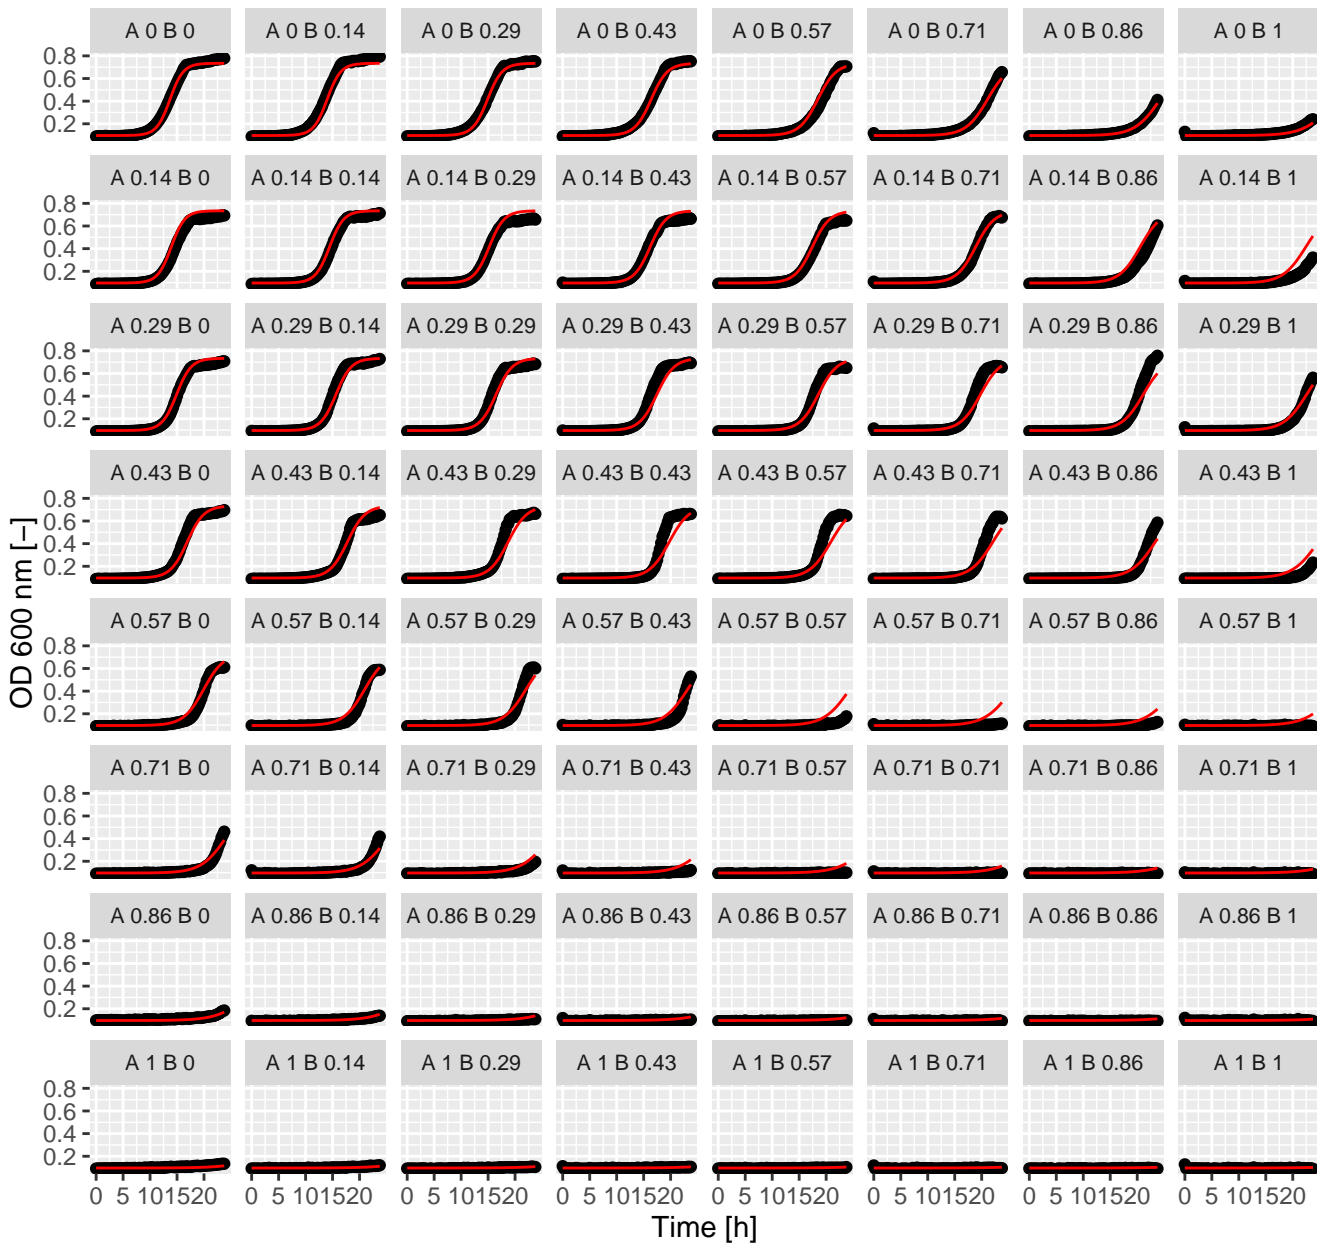

Hal.Hal (= Ax.Bx) exp. additivity (LA)  
Int\_AB = 0 and Int\_BA = 0 at EC50

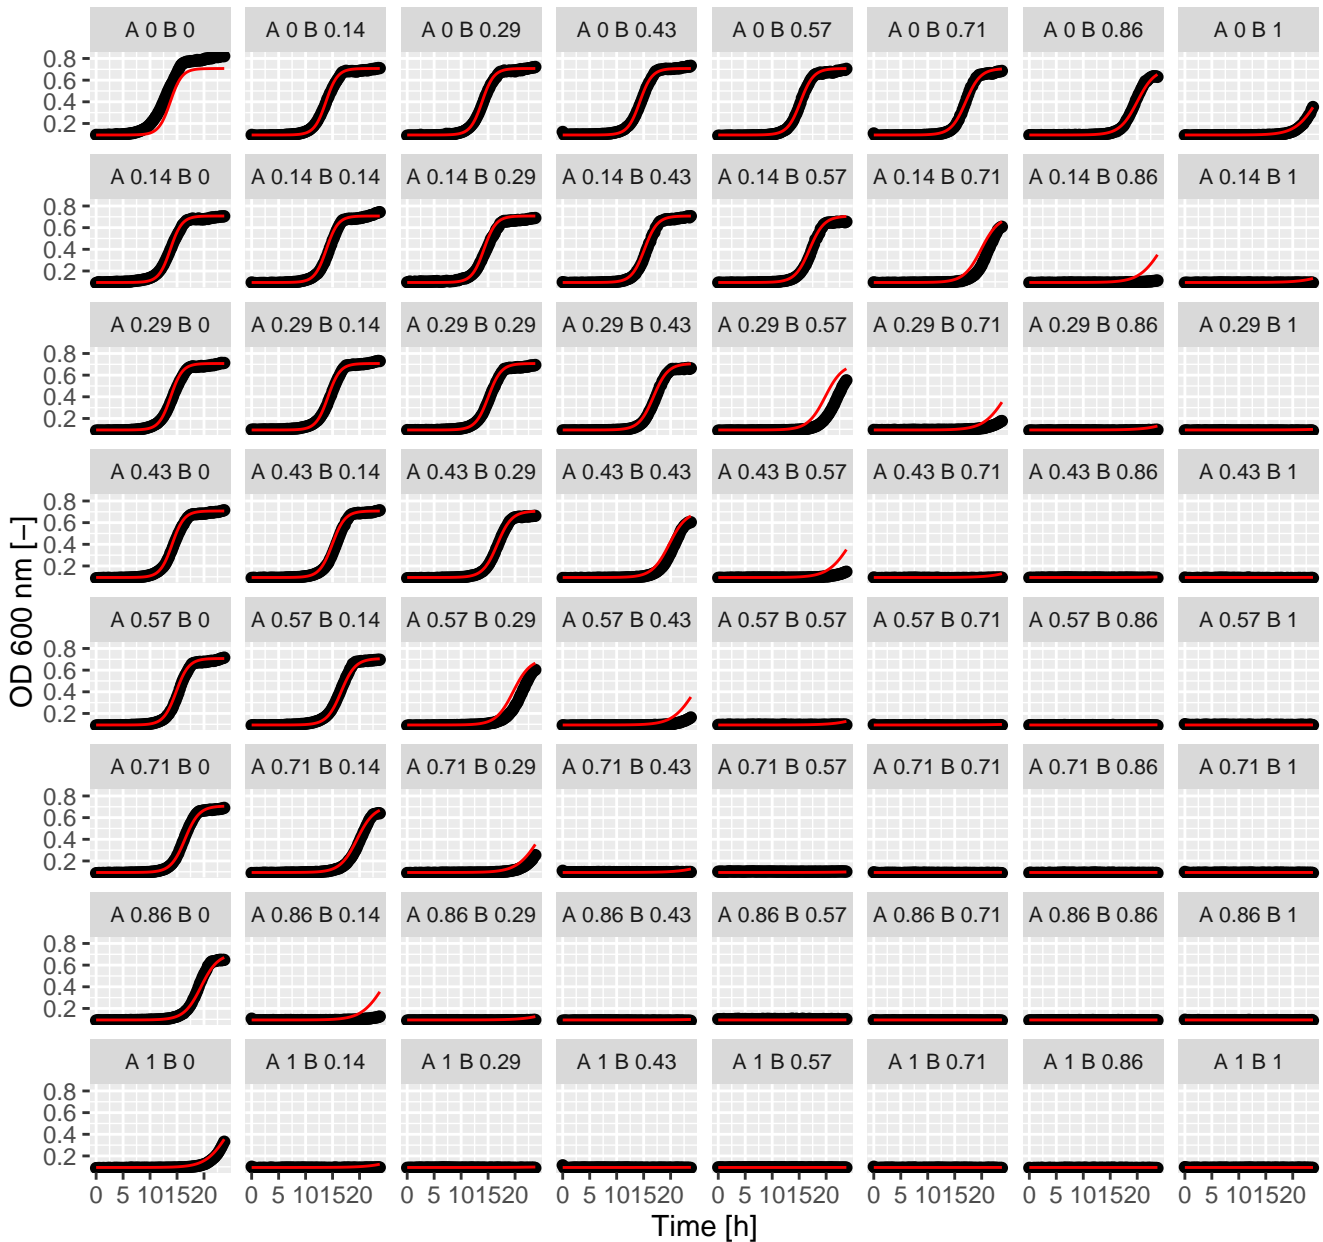

Hal.Hal (= Ax.Bx) full GPDI  
Int\_AB = -0.17 and Int\_BA = -0.05 at EC50

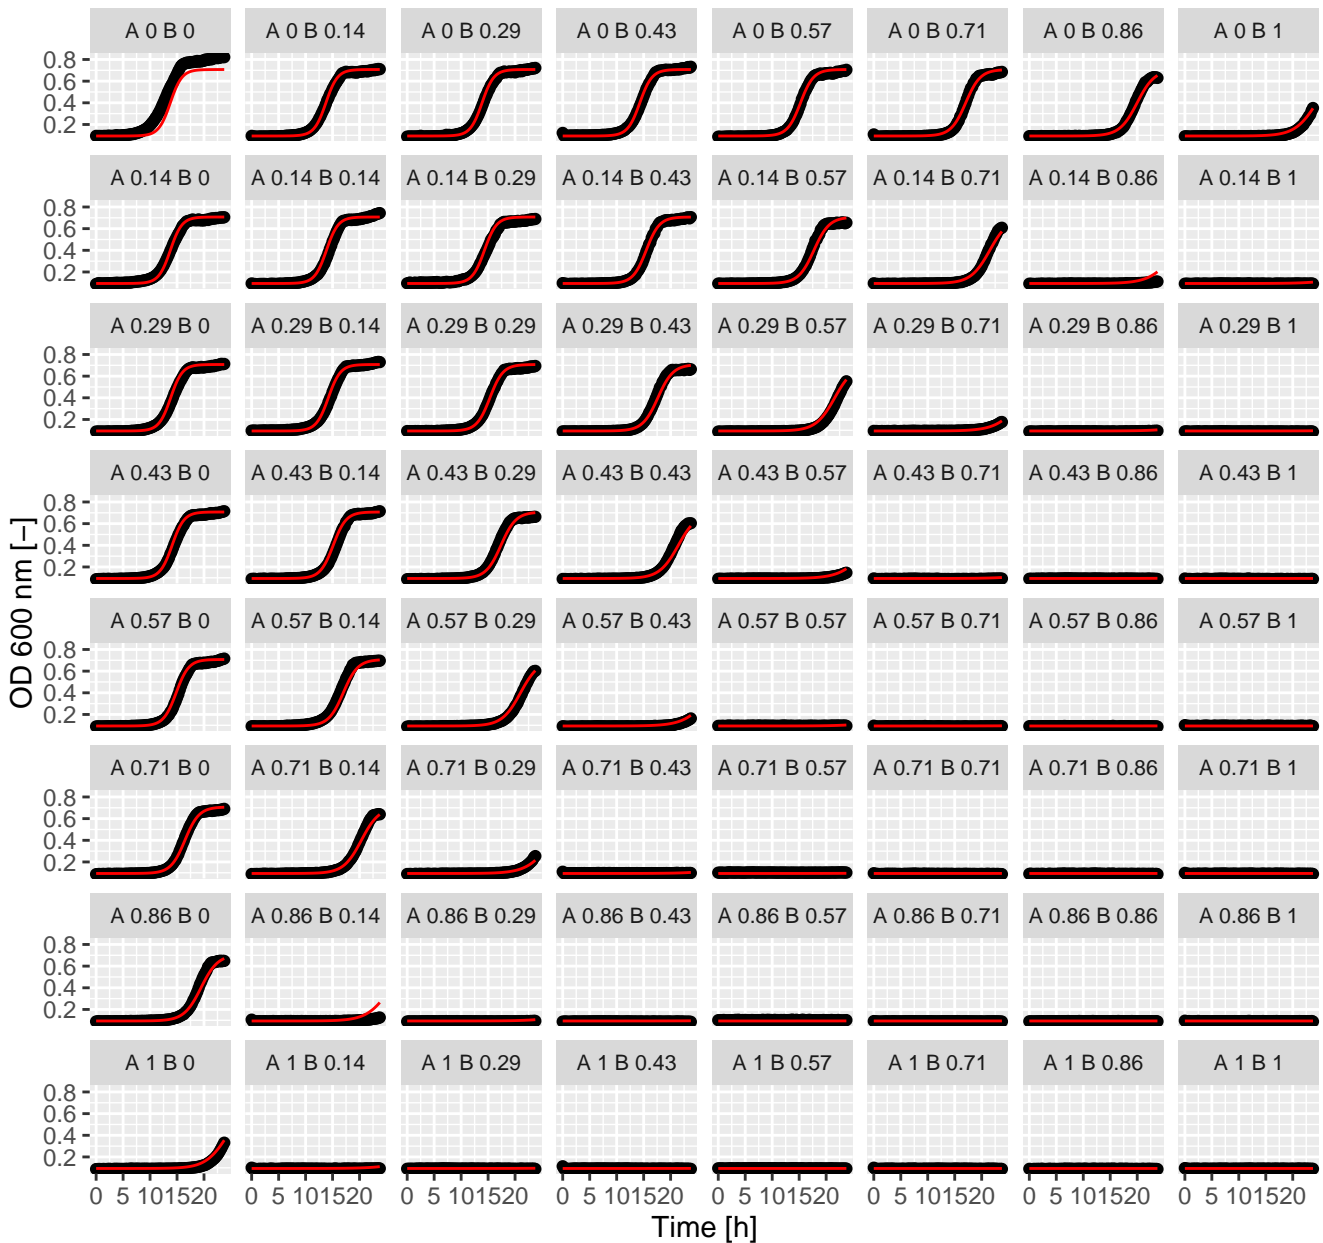

Hal.Lat (= Ax.Bx) exp. additivity (LA)  
 Int\_AB = 0 and Int\_BA = 0 at EC50

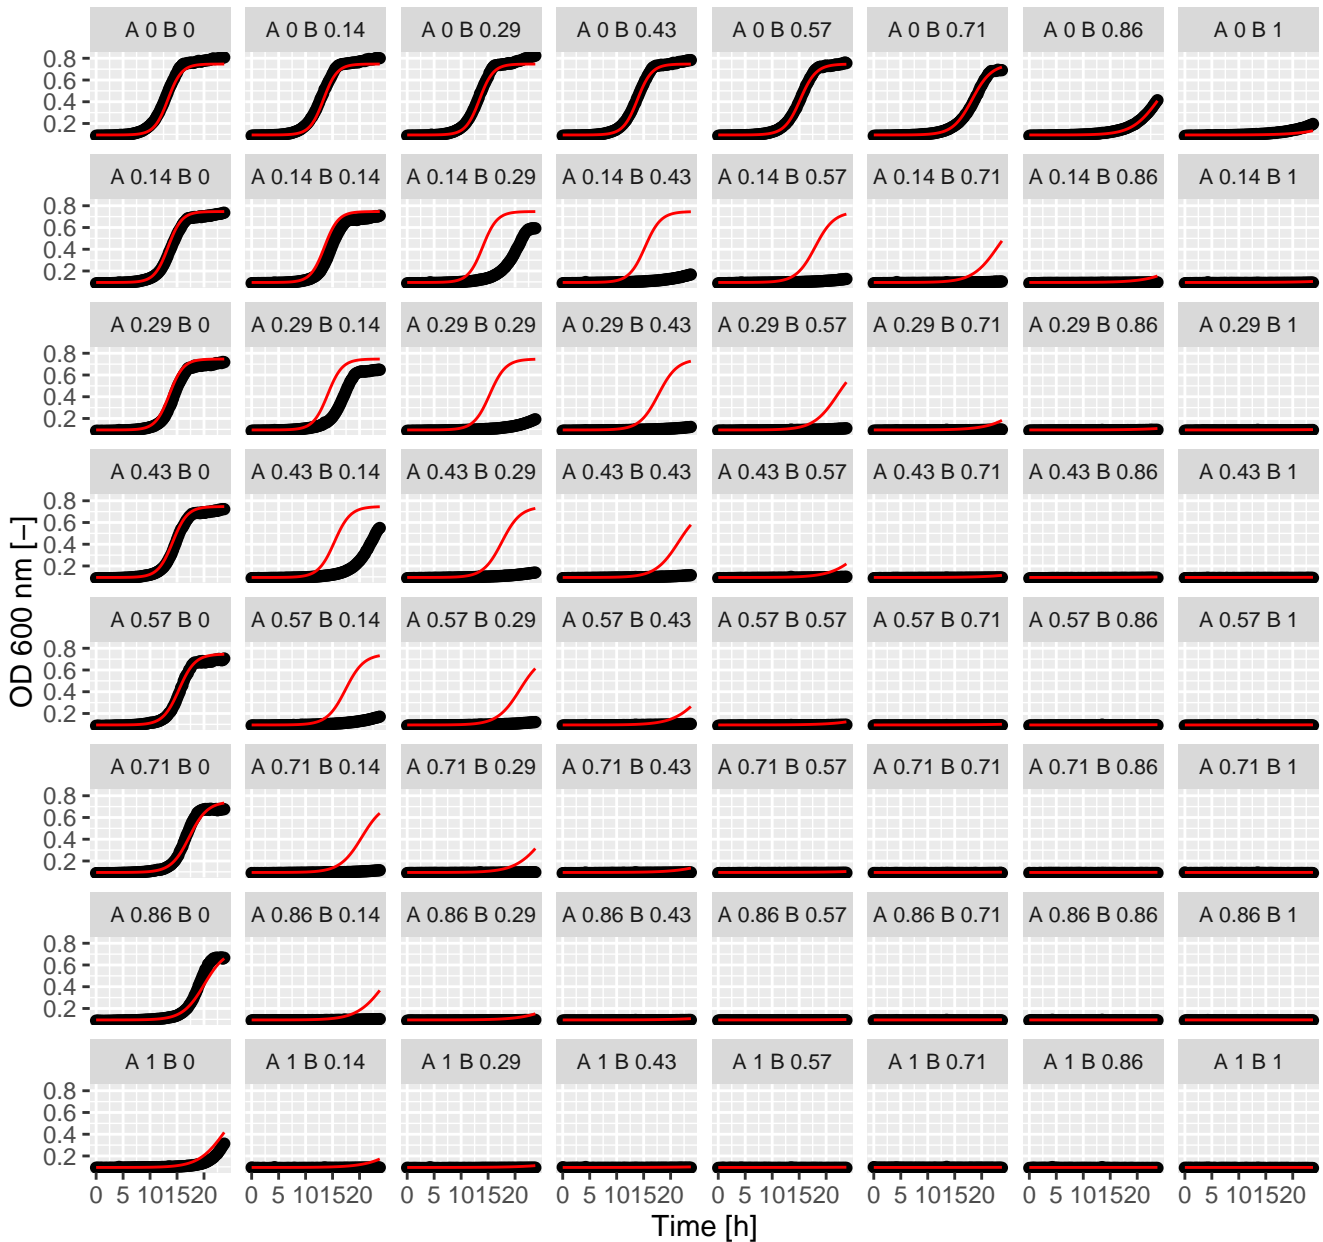

Hal.Lat (= Ax.Bx) full GPD1  
 Int\_AB = -0.29 and Int\_BA = -0.53 at EC50

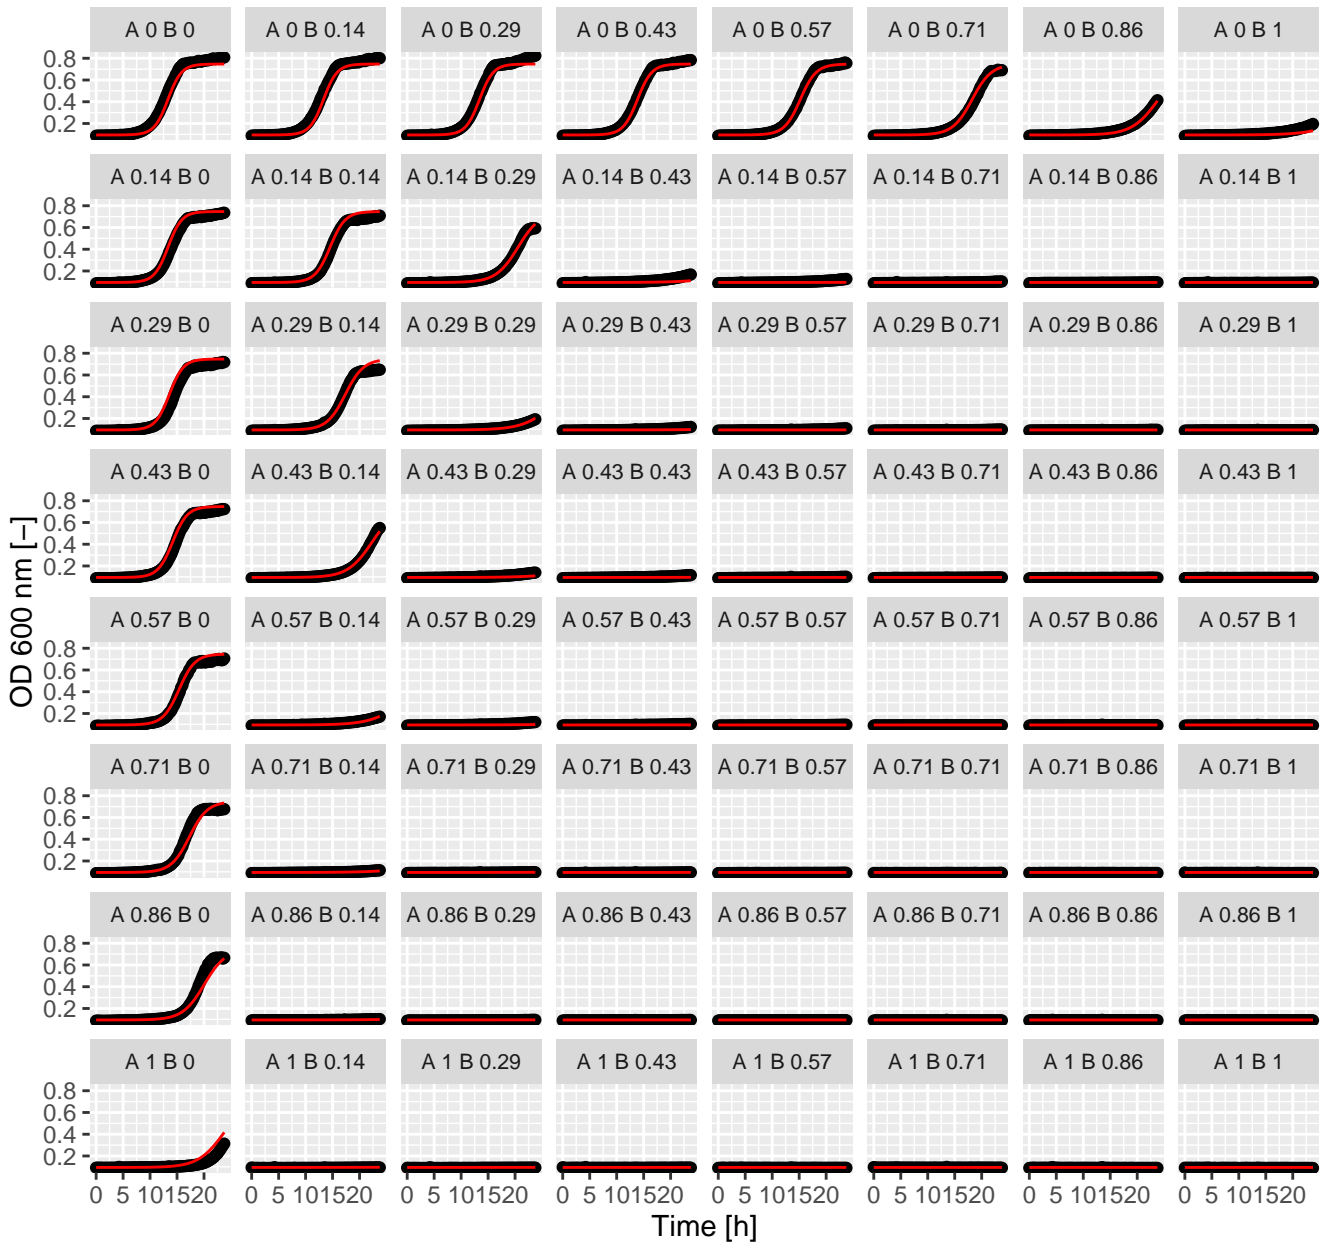



Hal.Pen (= Ax.Bx) exp. additivity (LA)  
Int\_AB = 0 and Int\_BA = 0 at EC50

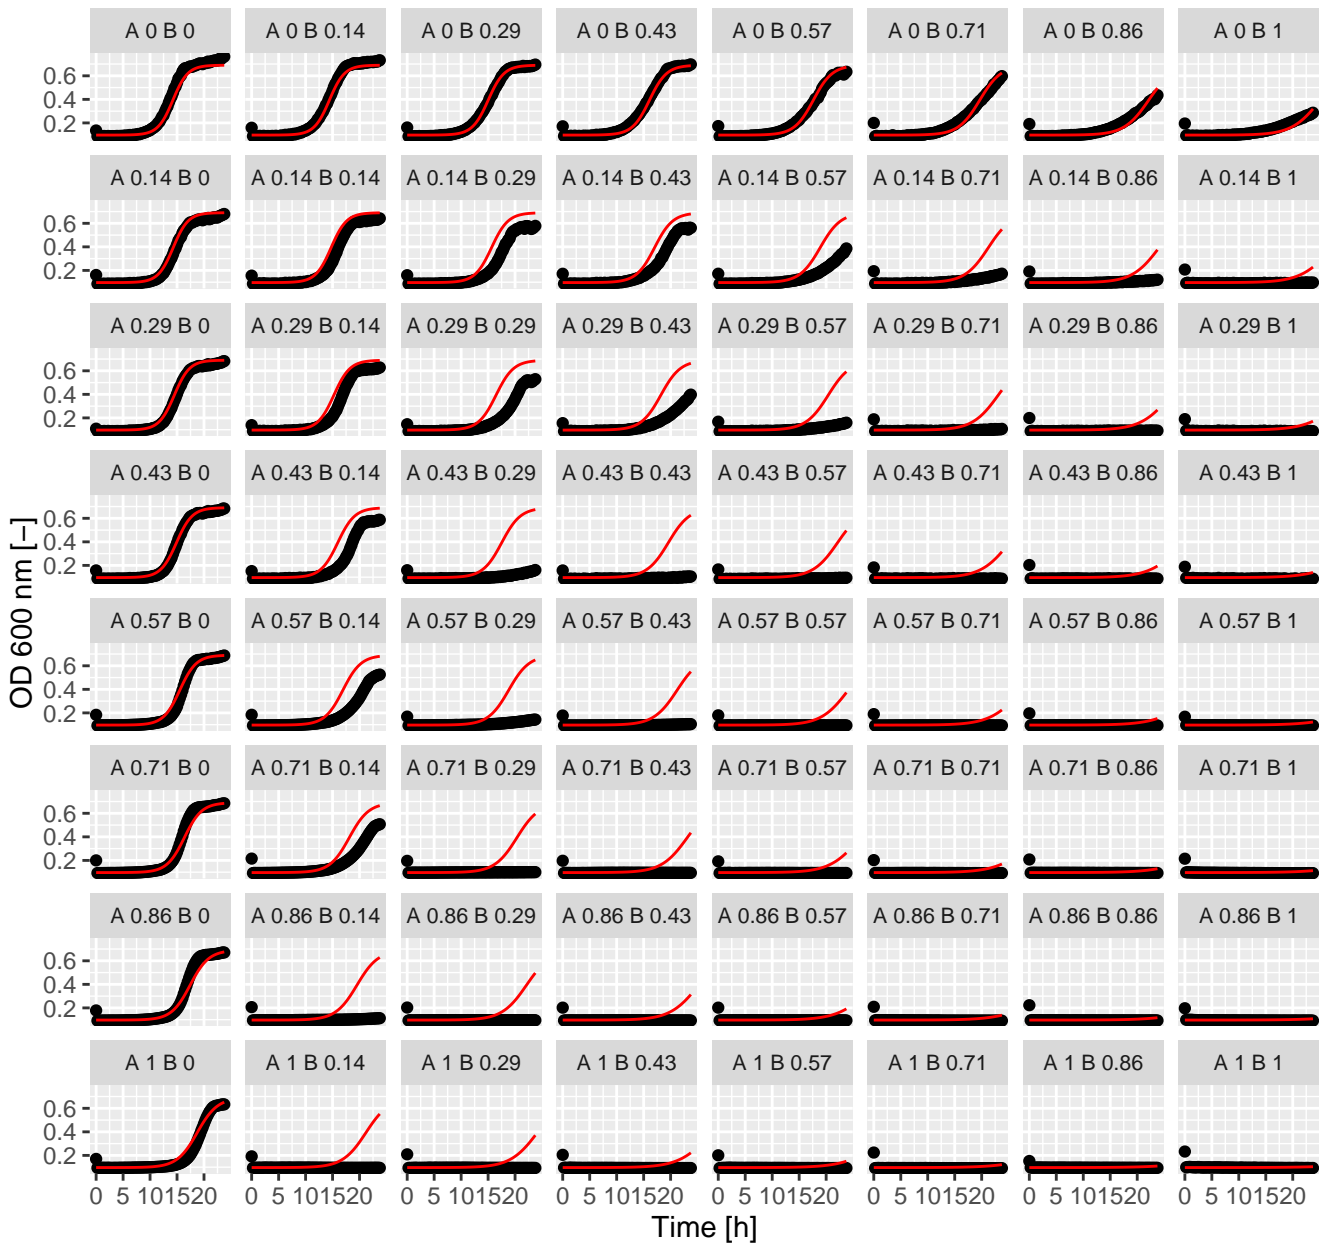

Hal.Pen (= Ax.Bx) full GPDI  
 Int\_AB = -0.55 and Int\_BA = -0.57 at EC50

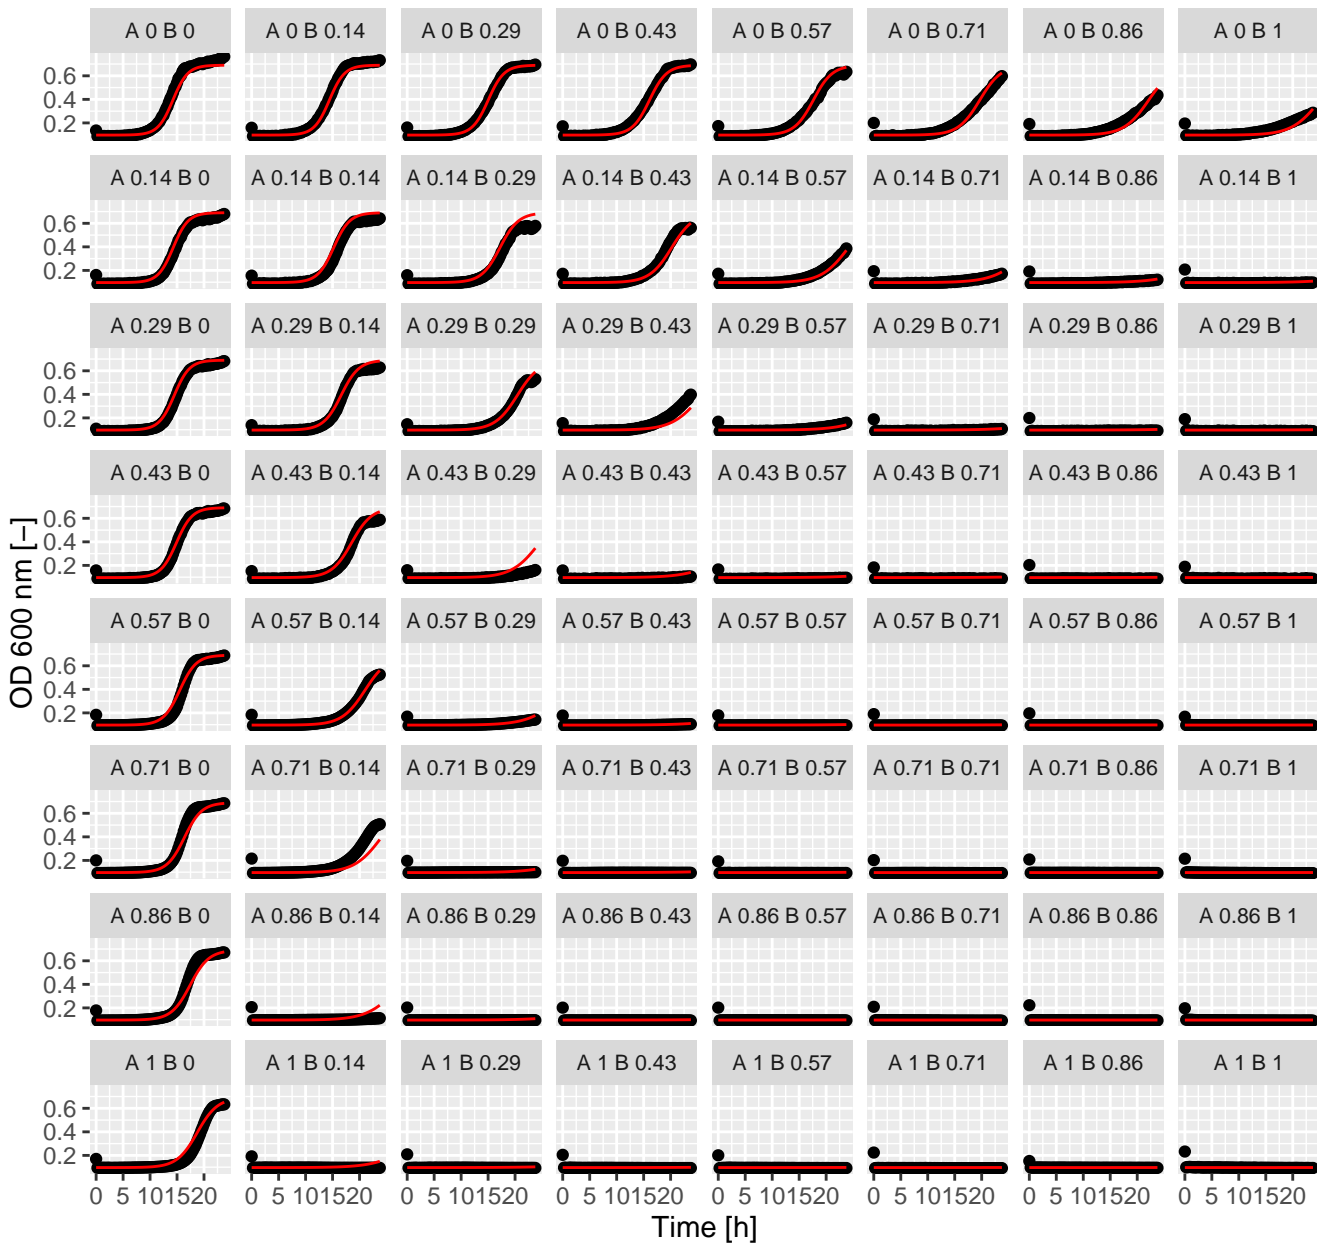

Hal.Rap (= Ax.Bx) exp. additivity (LA)  
Int\_AB = 0 and Int\_BA = 0 at EC50

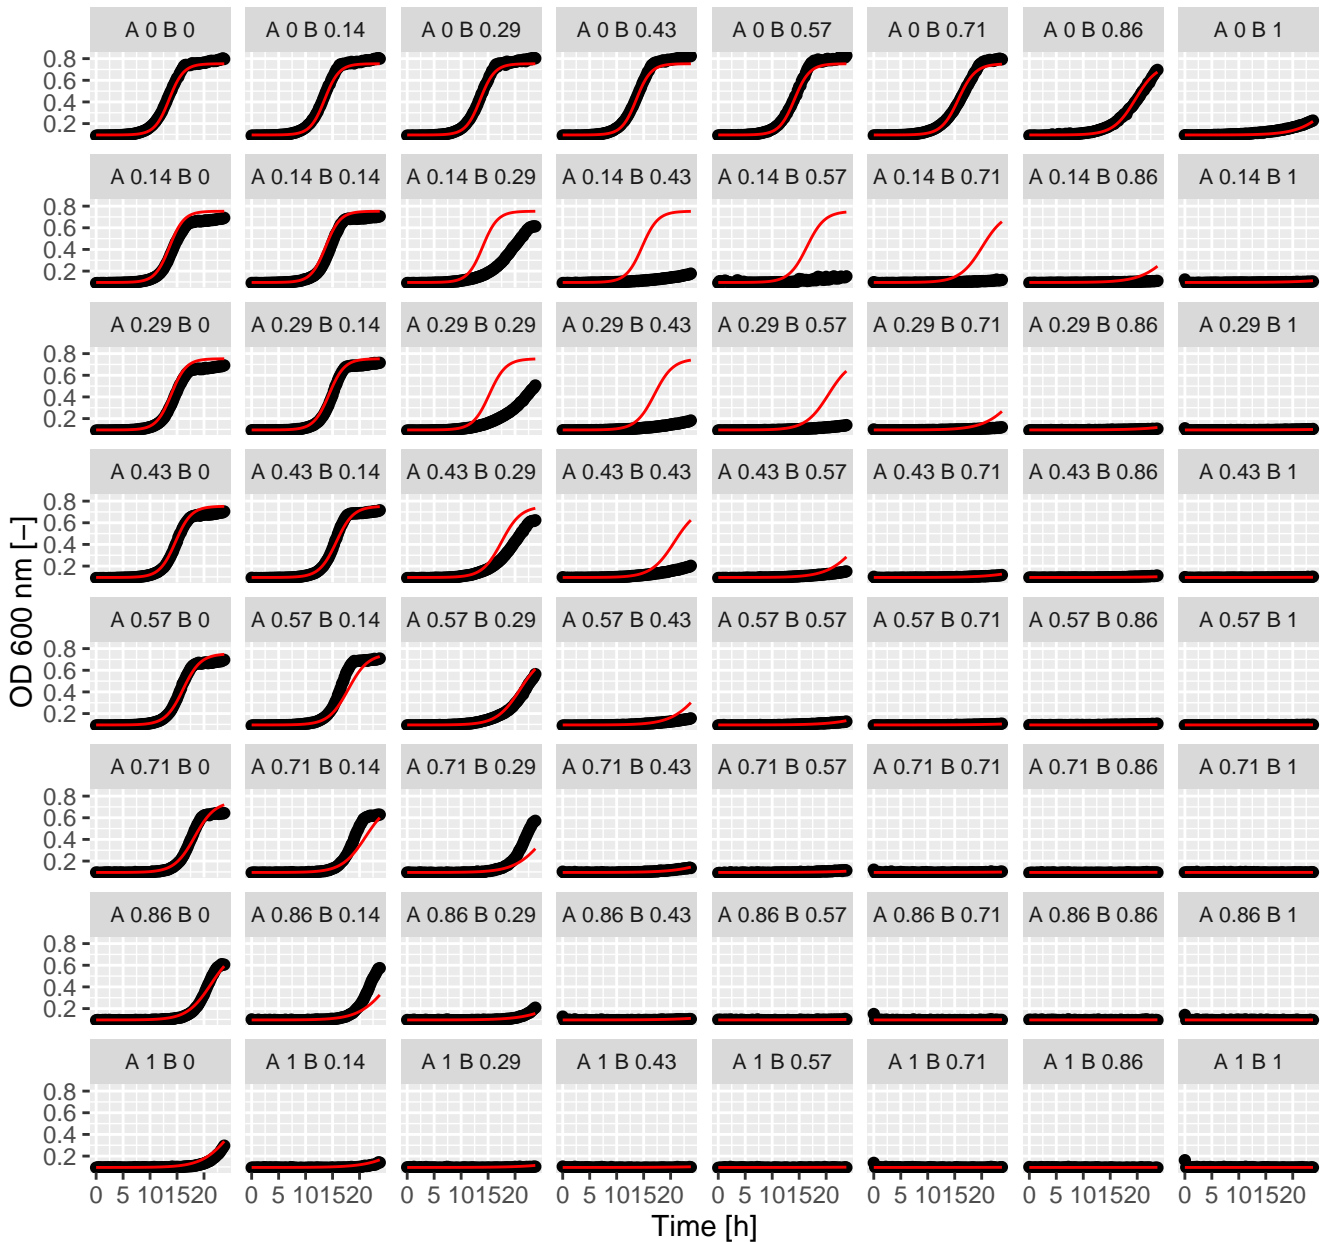

Hal.Rap (= Ax.Bx) full GPDI  
 Int\_AB = 4.18 and Int\_BA = -0.6 at EC50

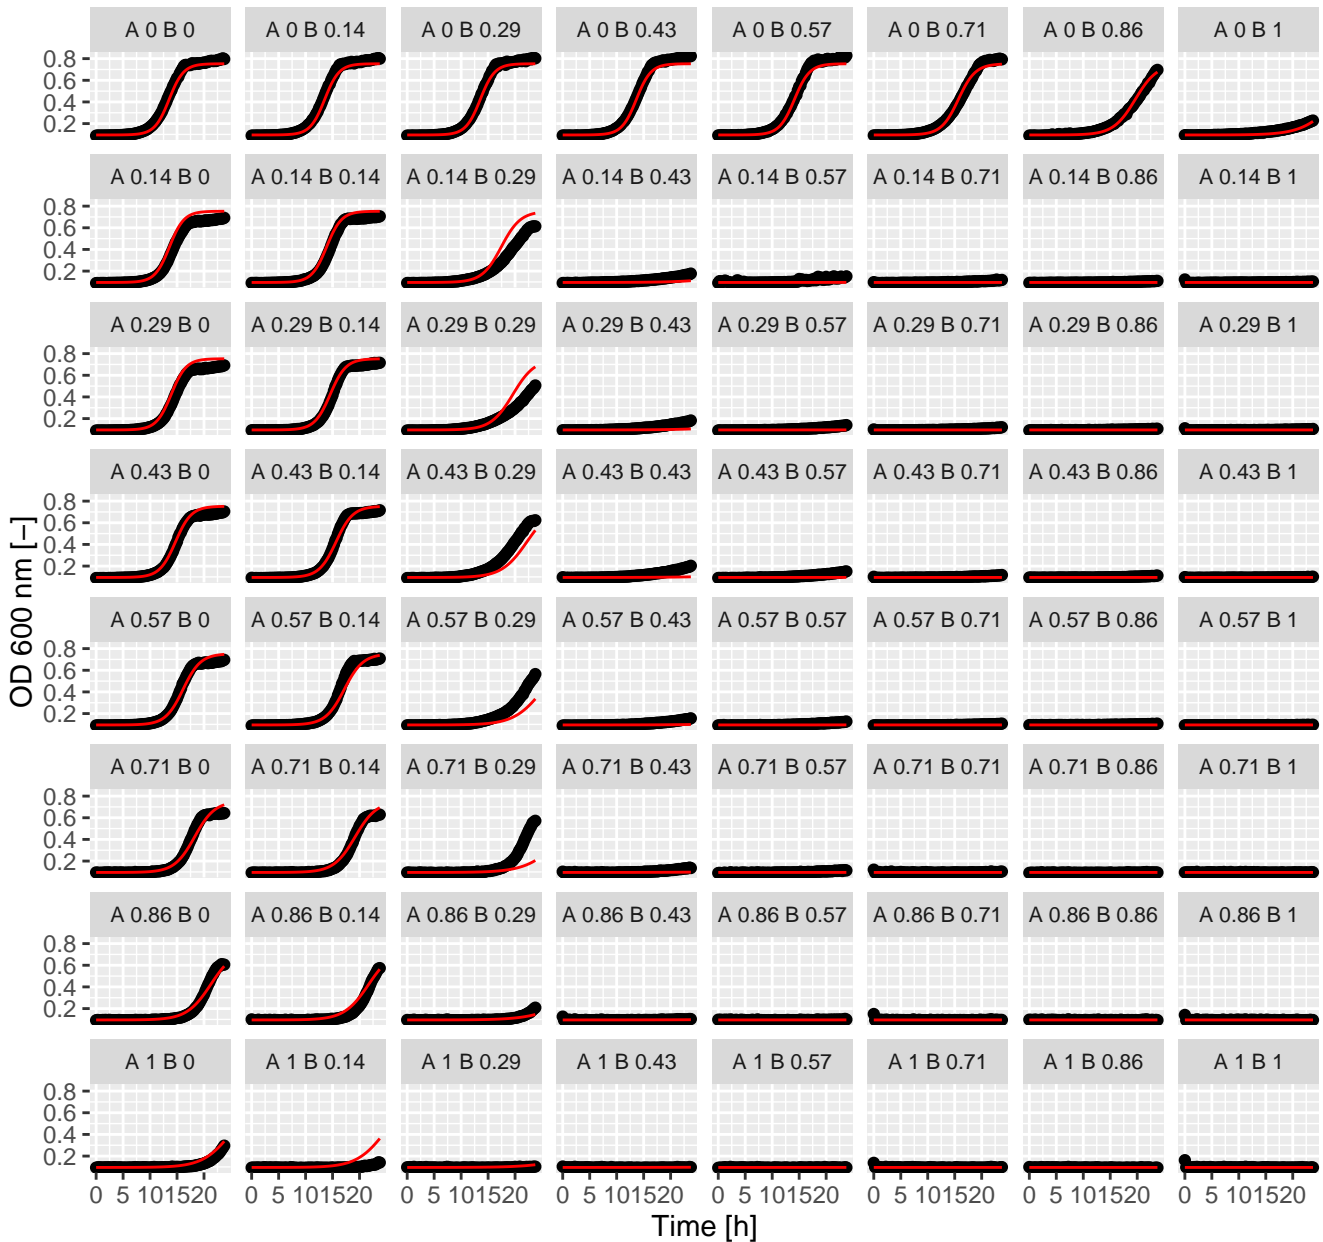

Hal.Sta (= Ax.Bx) exp. additivity (LA)  
Int\_AB = 0 and Int\_BA = 0 at EC50

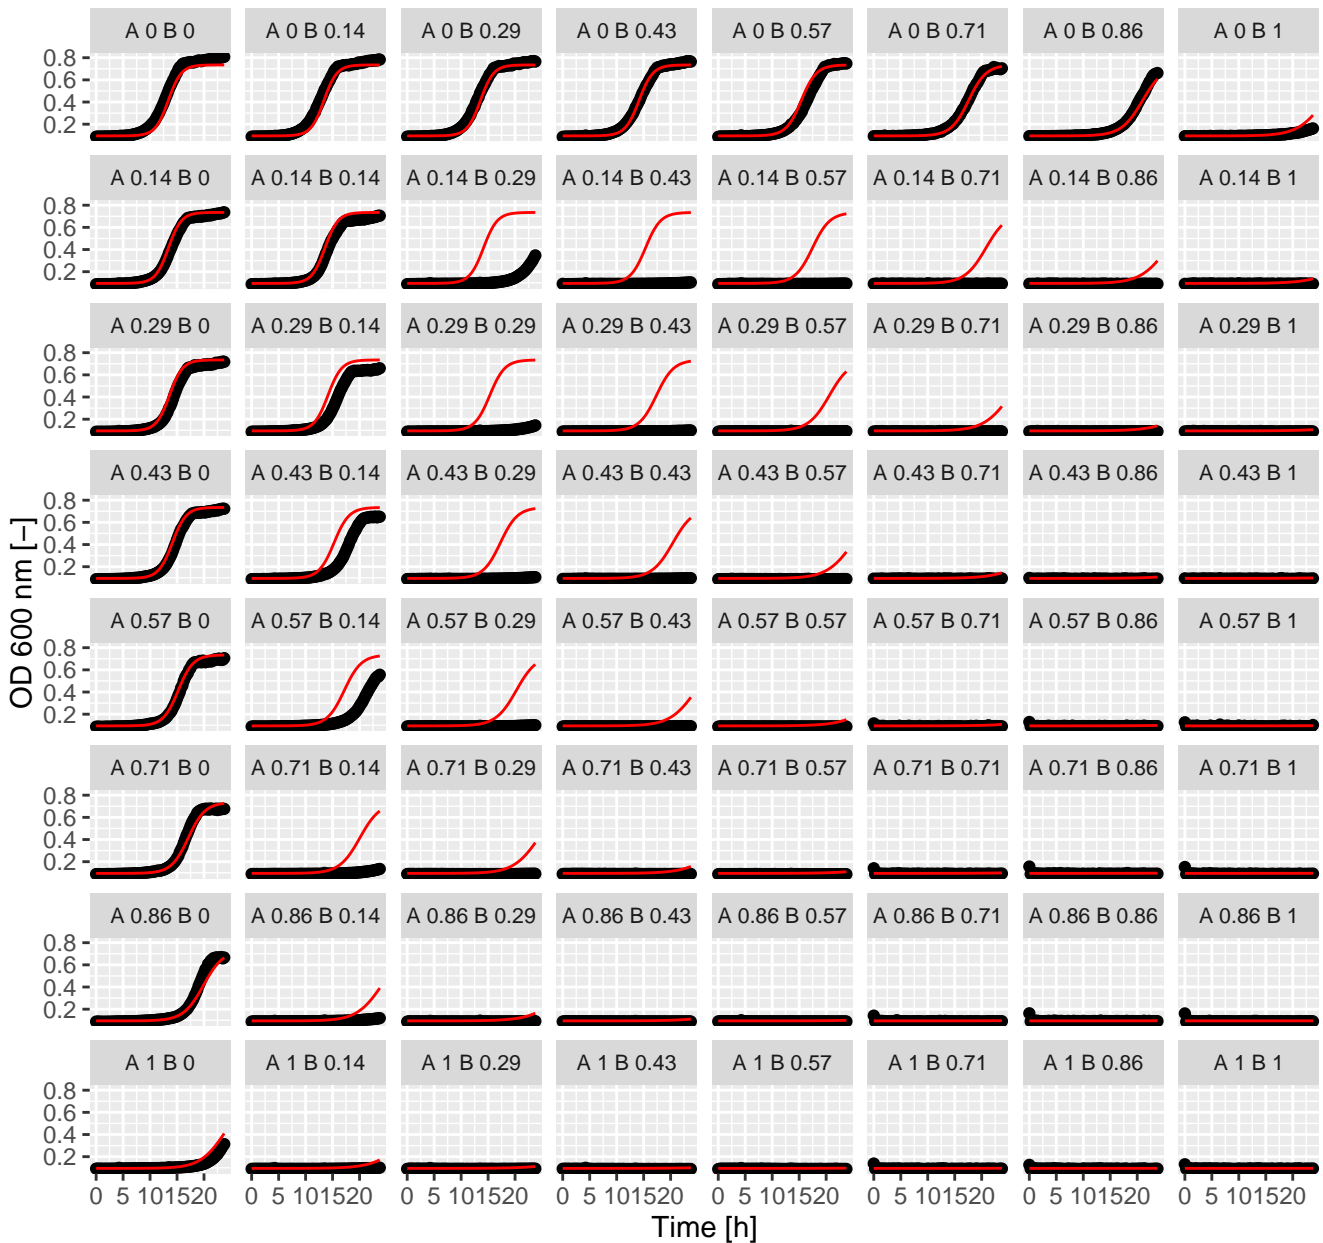

Hal.Sta (= Ax.Bx) full GPDI  
Int\_AB = 0.16 and Int\_BA = -0.66 at EC50

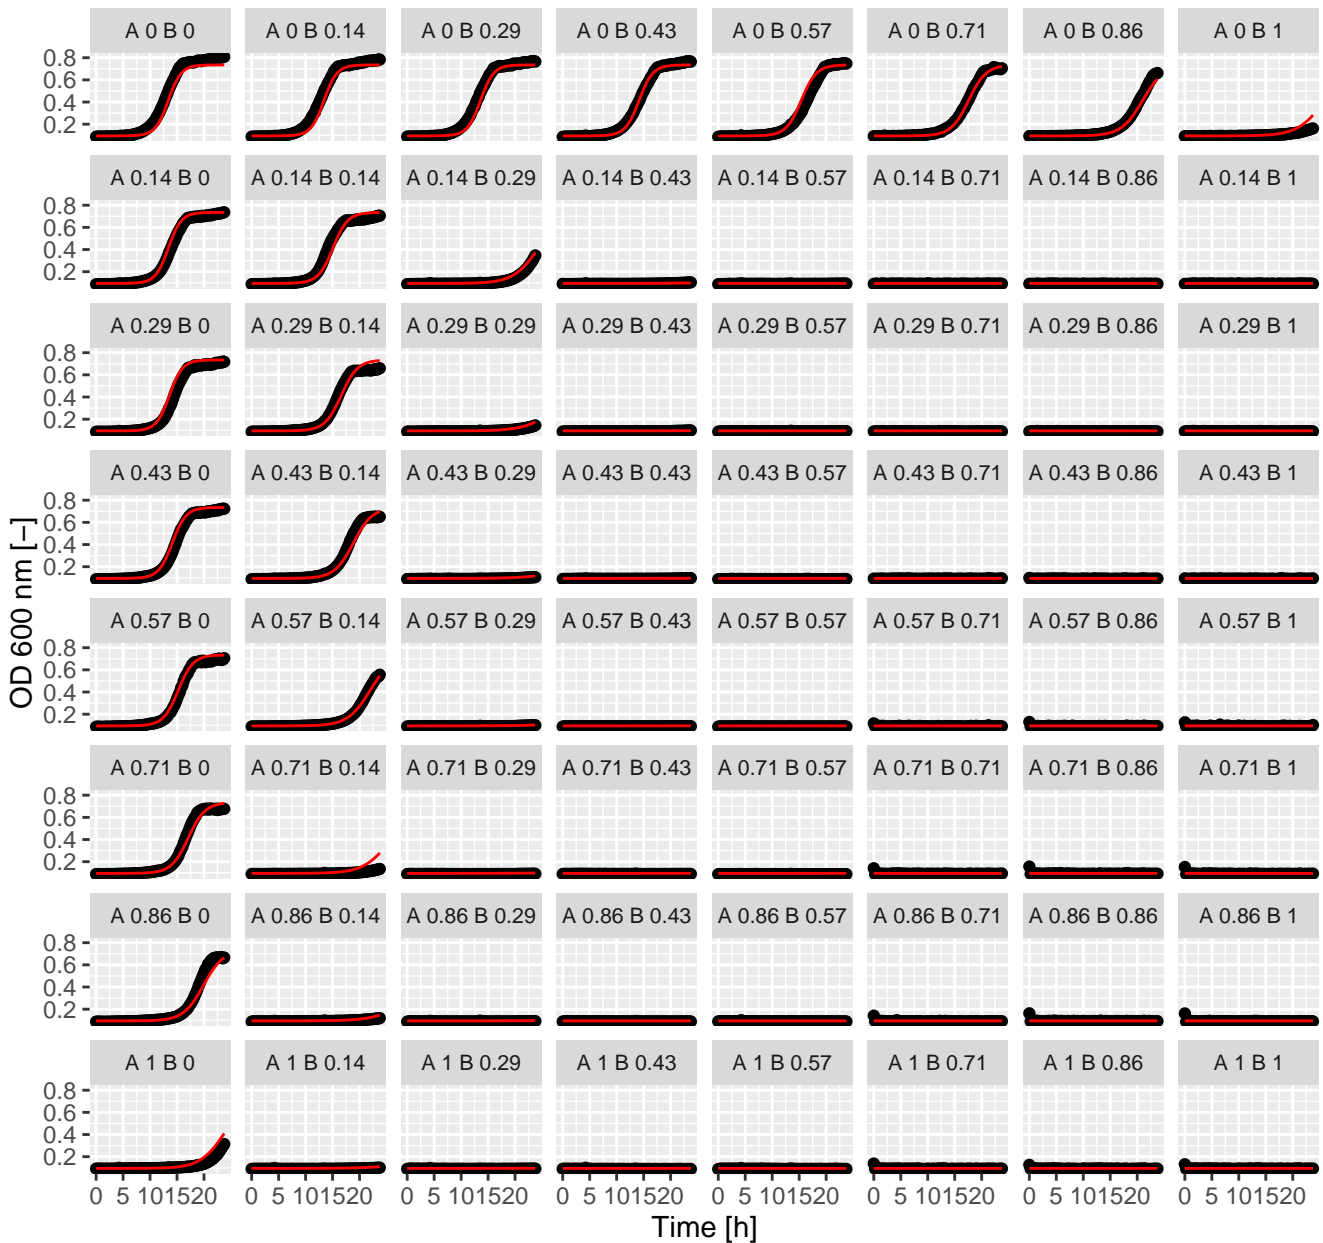



Hal.Tac (= Ax.Bx) full GPDI  
 Int\_AB = -0.41 and Int\_BA = -0.24 at EC50

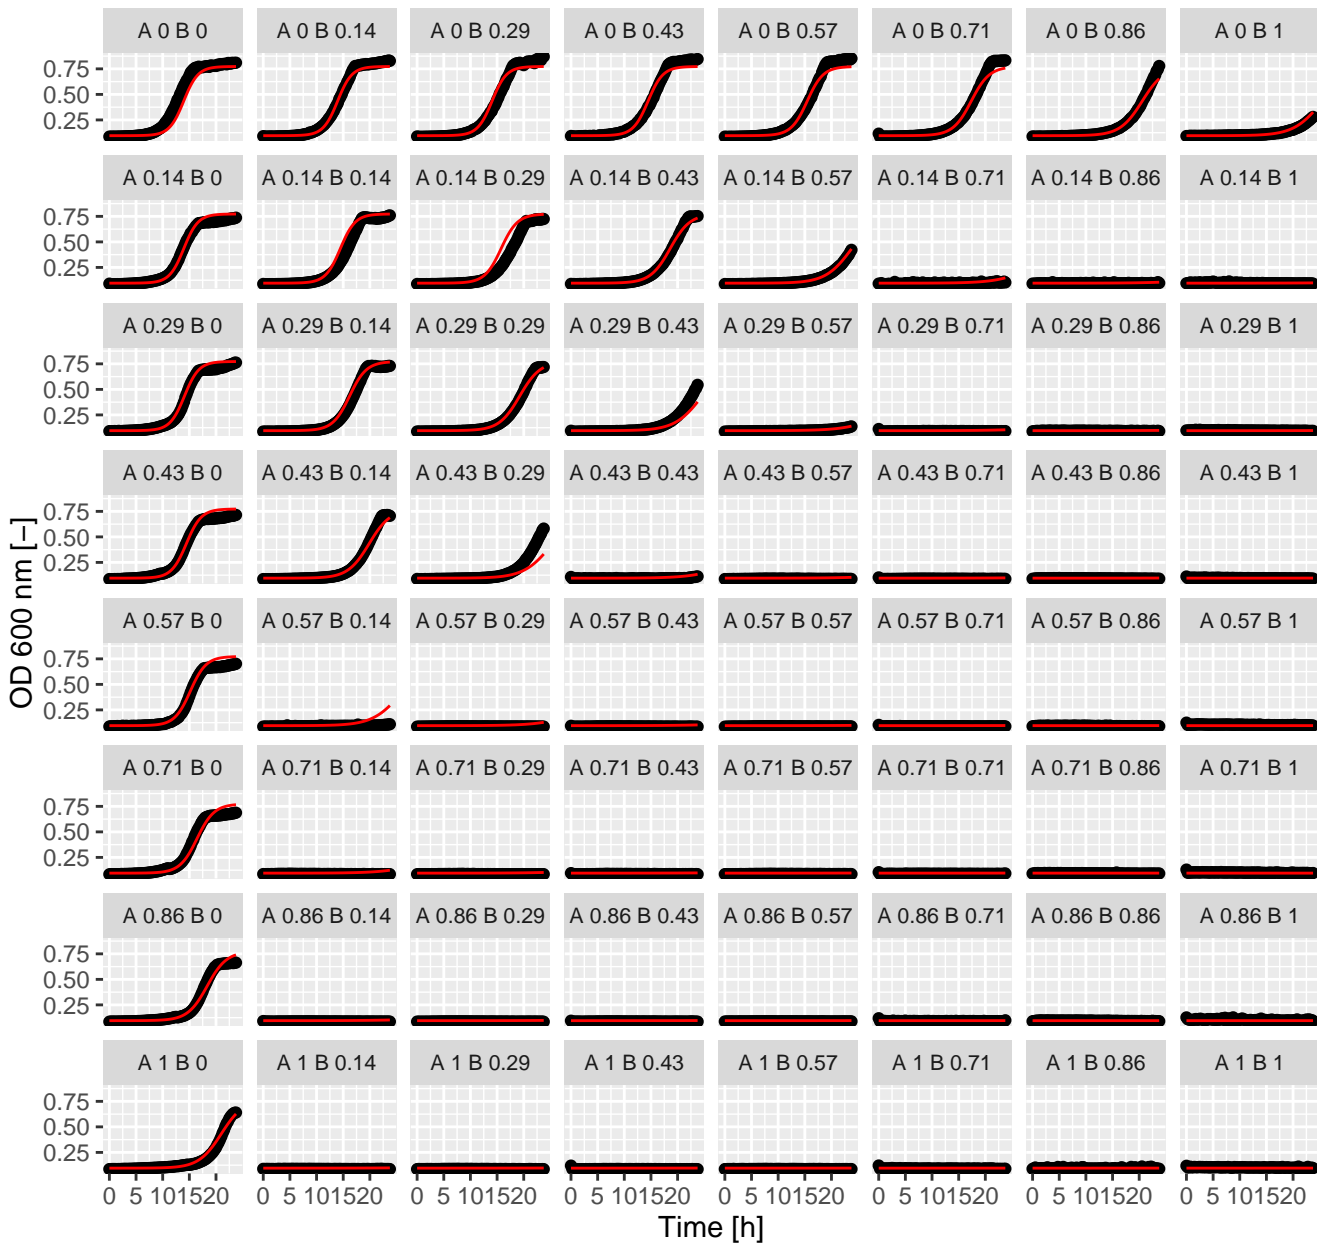



Hal.Ter (= Ax.Bx) exp. additivity (LA)  
 Int\_AB = 0 and Int\_BA = 0 at EC50

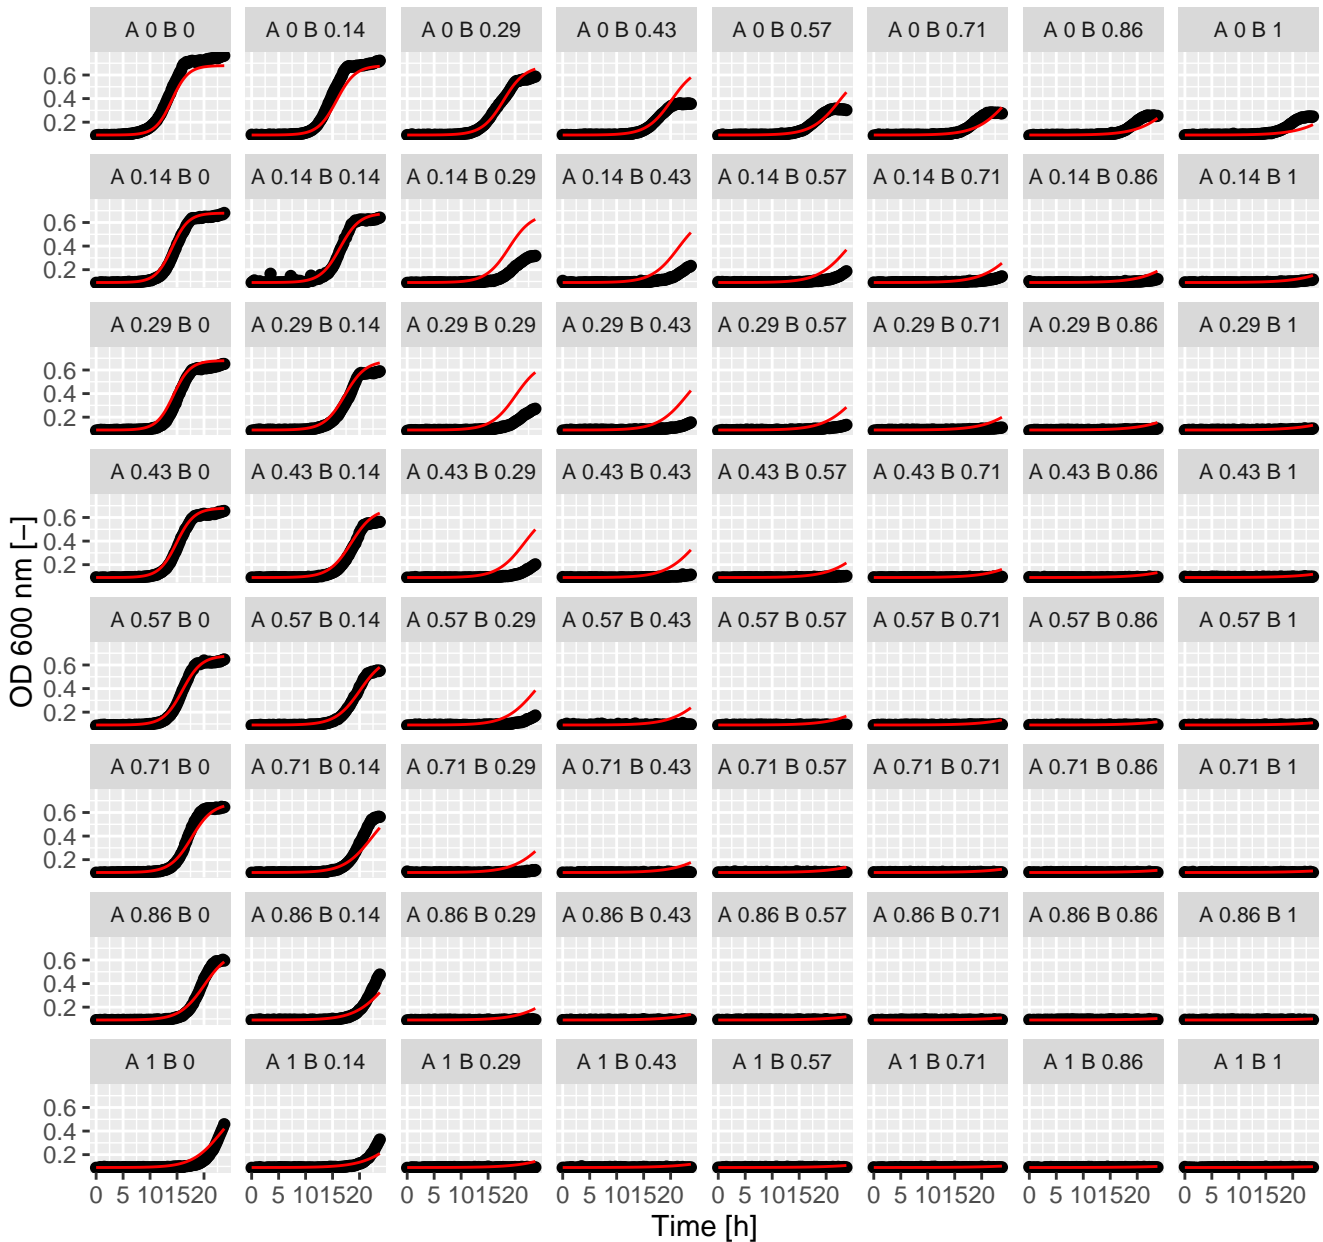

Hal.Ter (= Ax.Bx) full GPDI  
 Int\_AB = 1.04 and Int\_BA = -0.6 at EC50

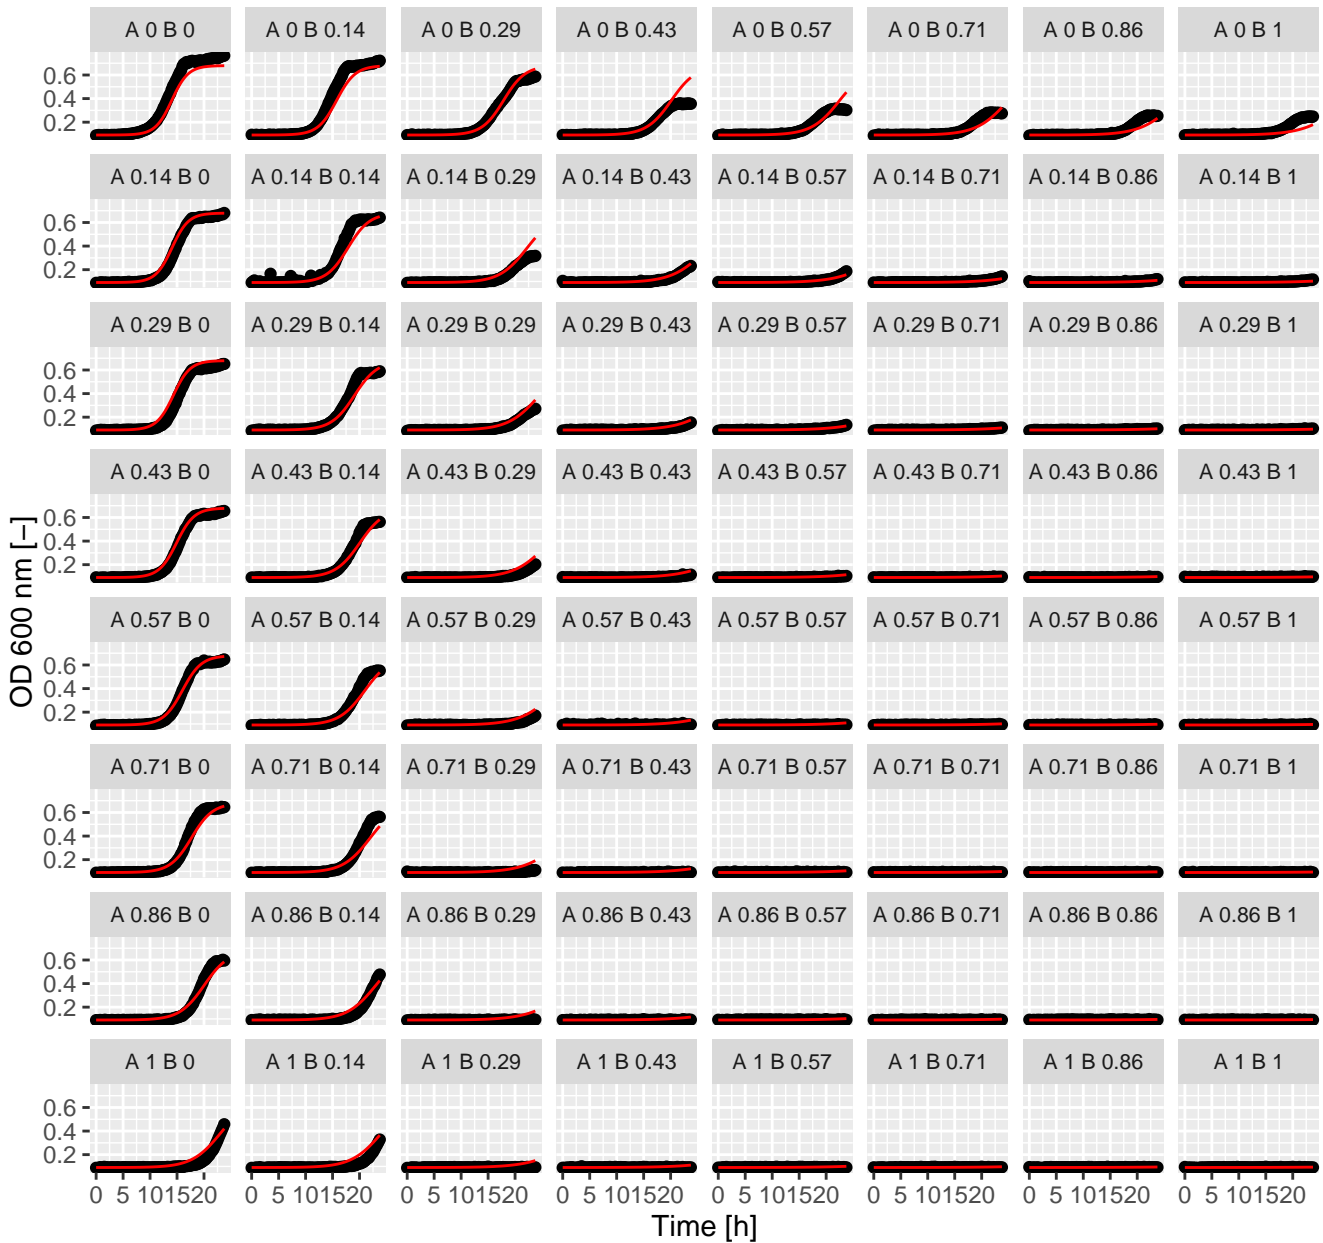

Hal.Tun (= Ax.Bx) exp. additivity (LA)  
Int\_AB = 0 and Int\_BA = 0 at EC50

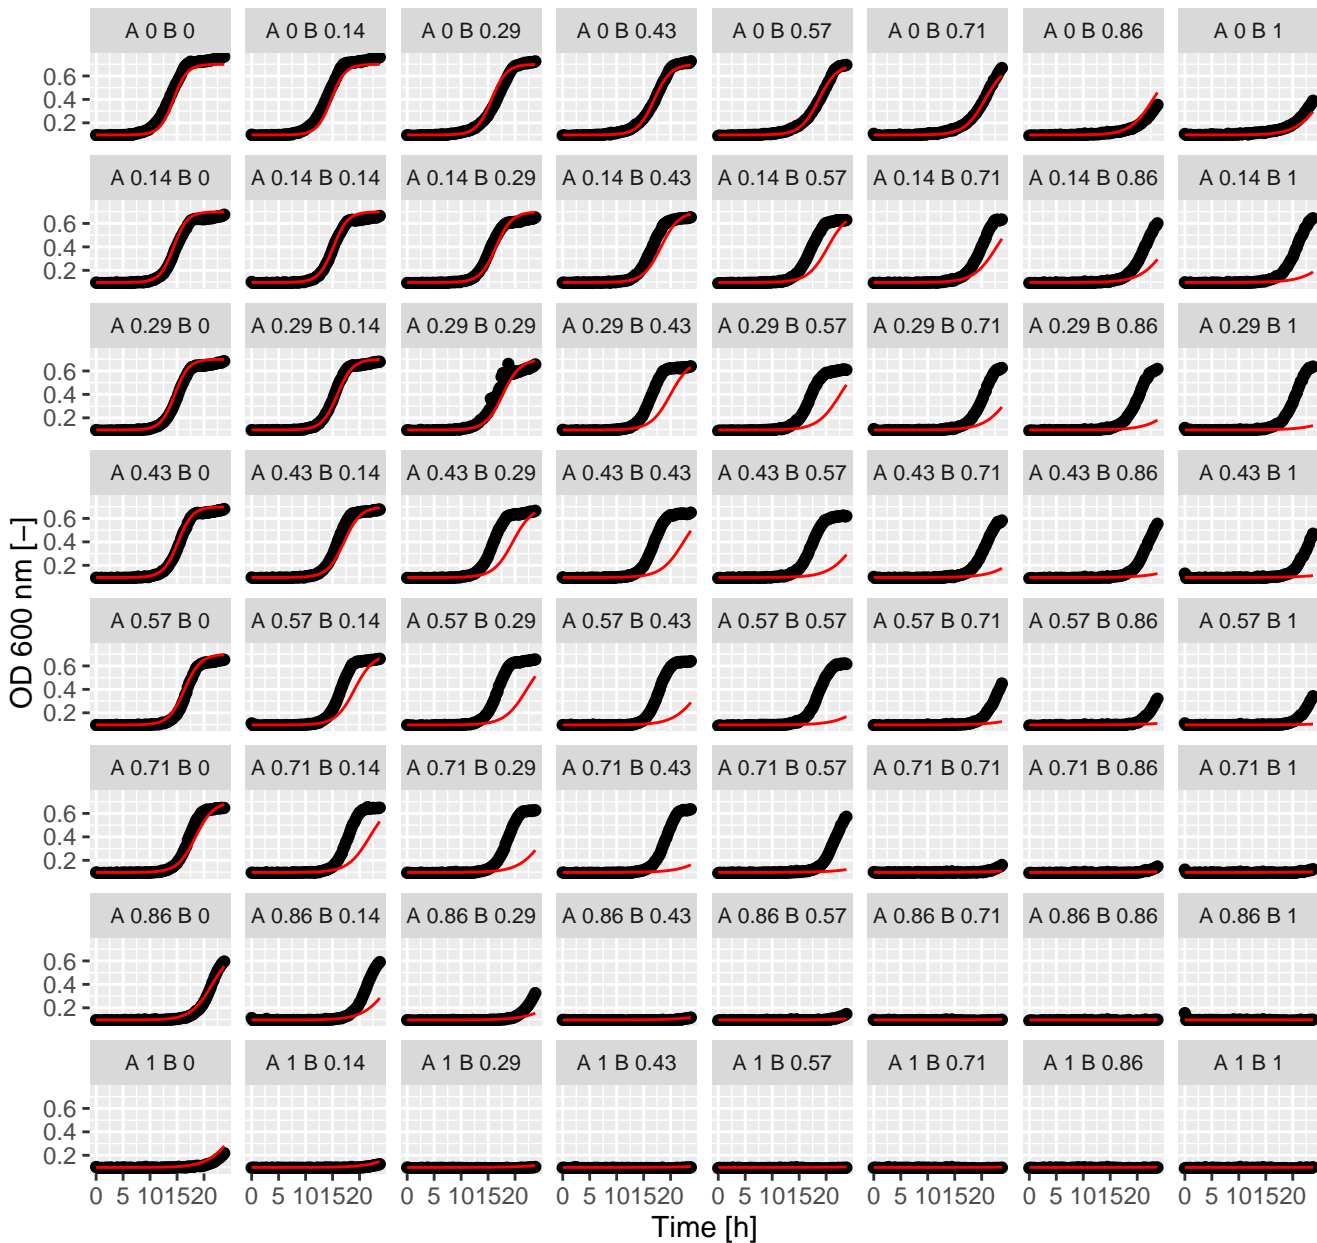

Hal.Tun (= Ax.Bx) full GPDI  
Int\_AB = 0.08 and Int\_BA = 1.49 at EC50

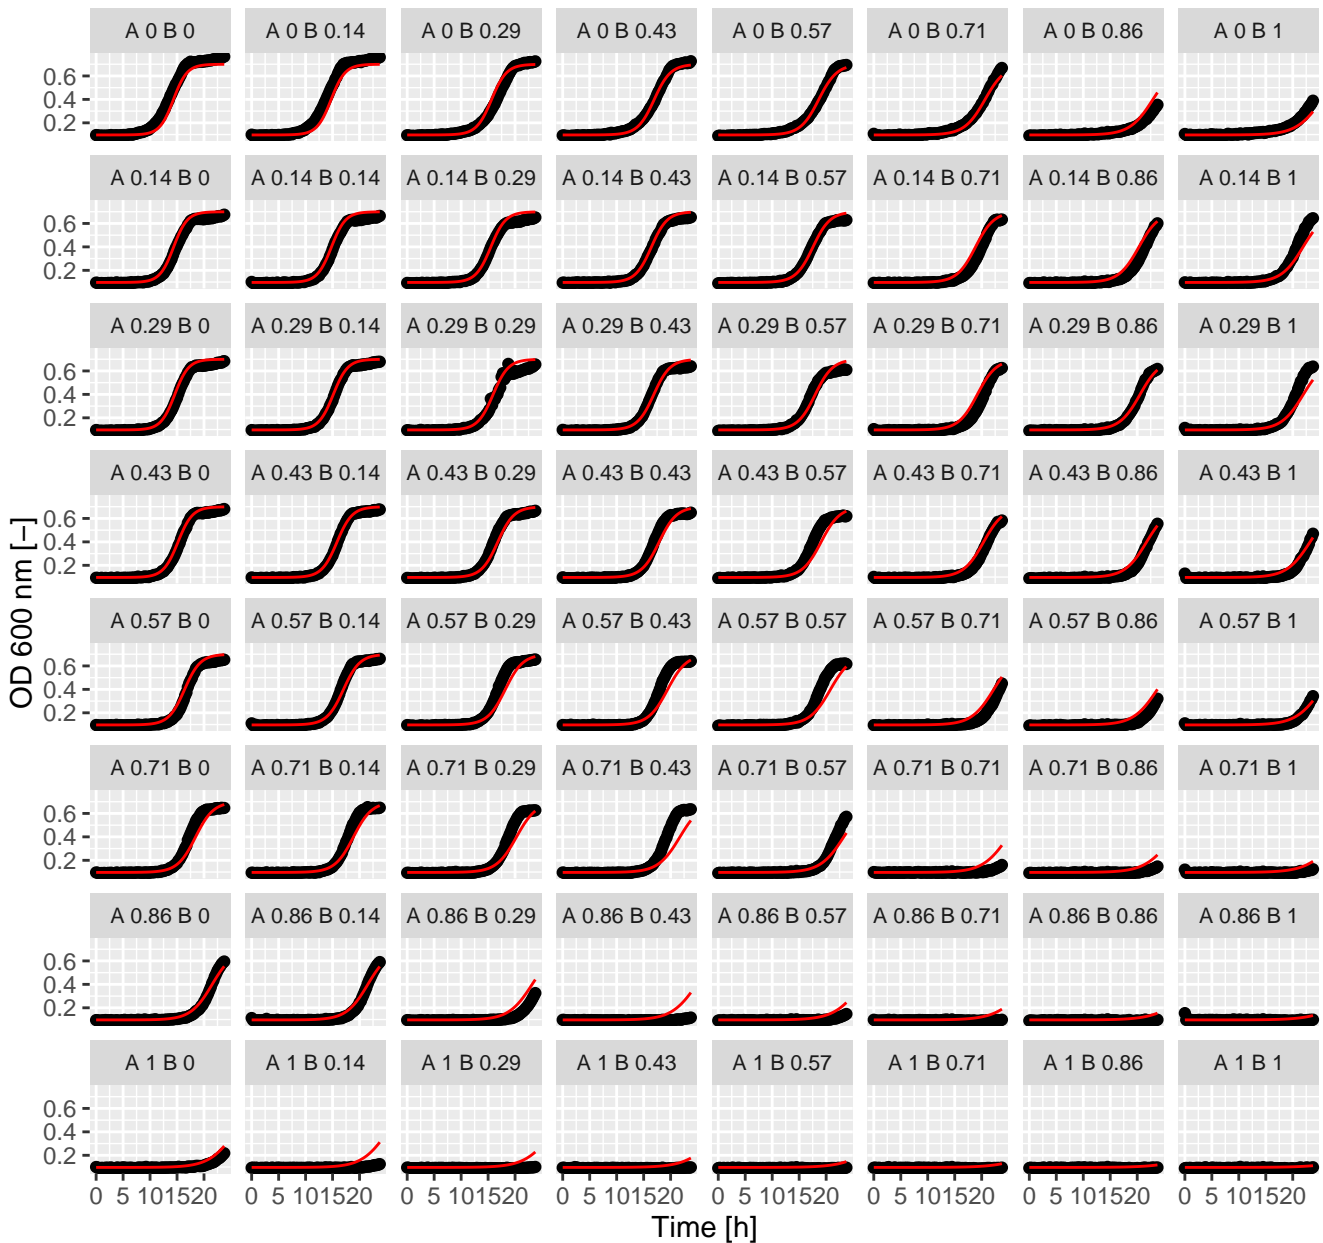

# Hyg.Lat (= Ax.Bx) exp. additivity (LA)

Int\_AB = 0 and Int\_BA = 0 at EC50

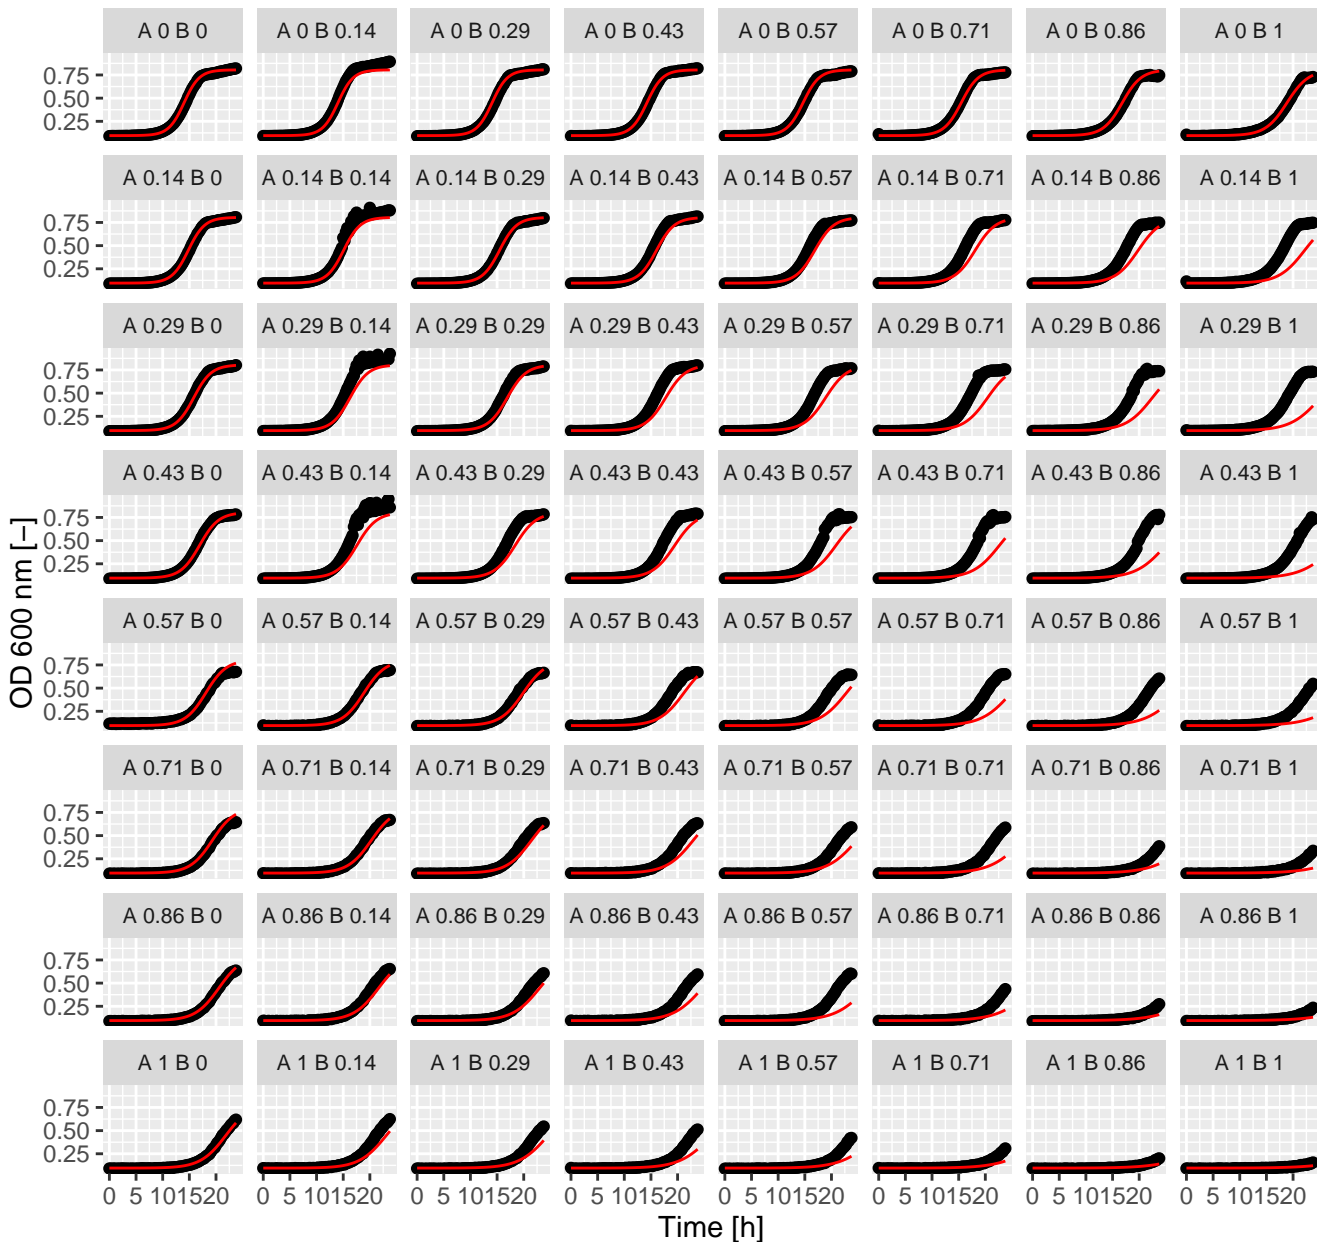

Hyg.Lat (= Ax.Bx) full GPDI  
Int\_AB = 0.16 and Int\_BA = 0.55 at EC50

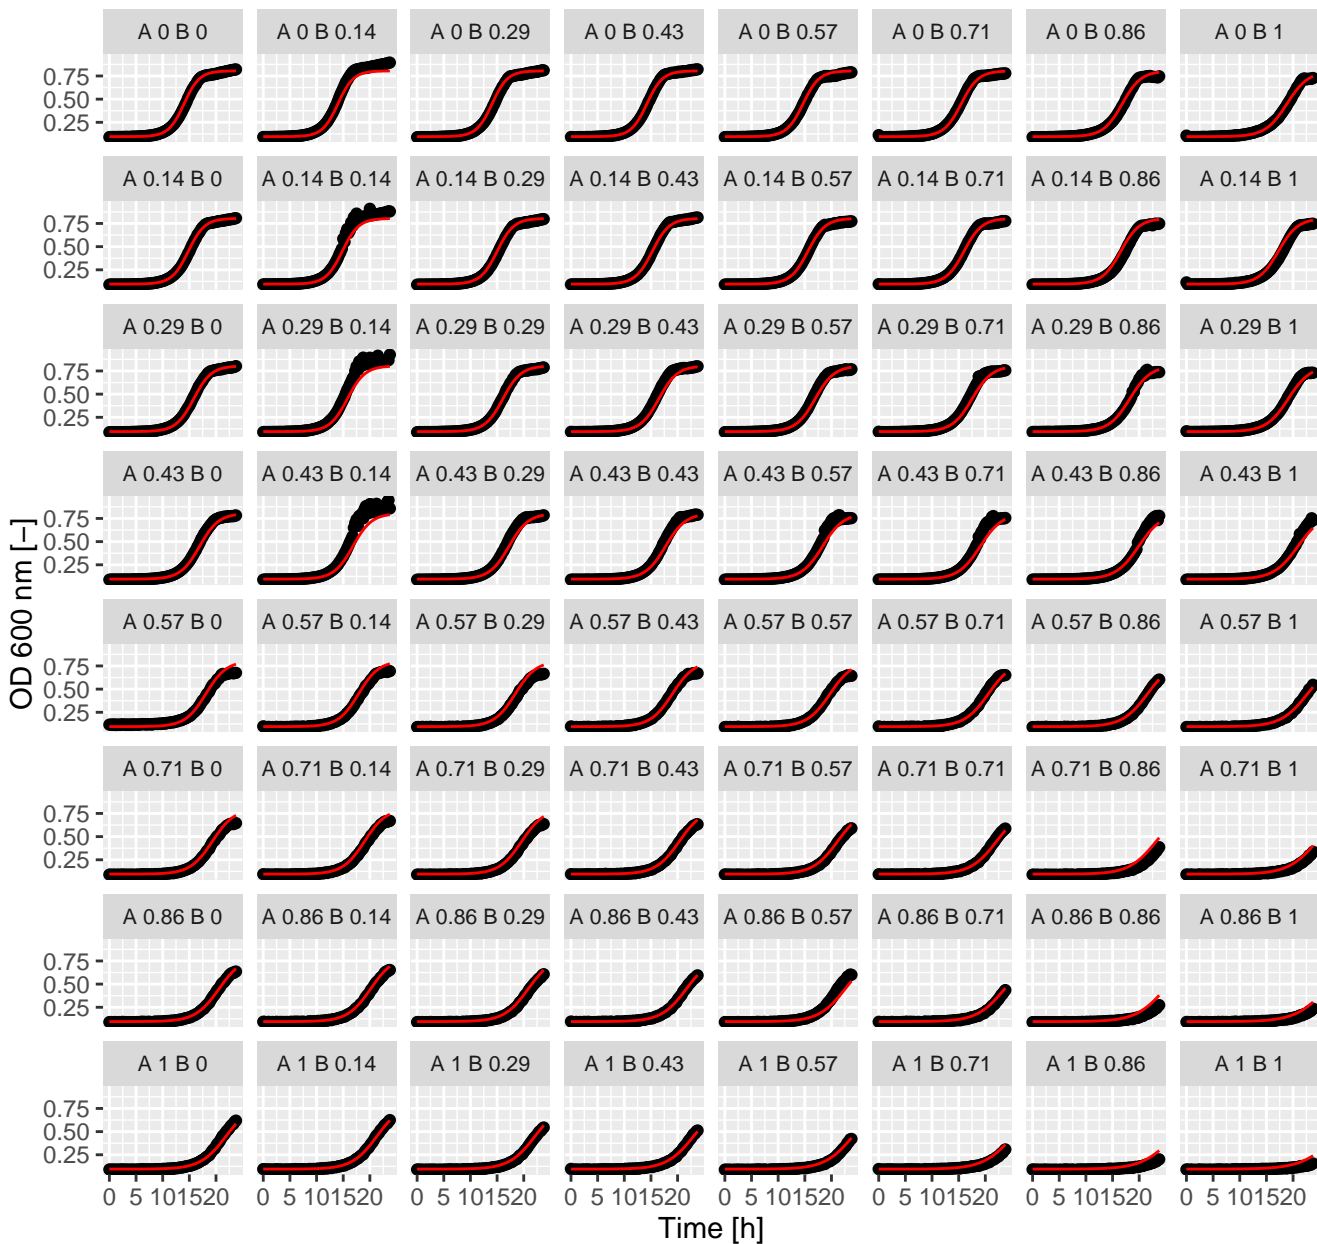

Hyg.Myr (= Ax.Bx) exp. additivity (LA)  
Int\_AB = 0 and Int\_BA = 0 at EC50

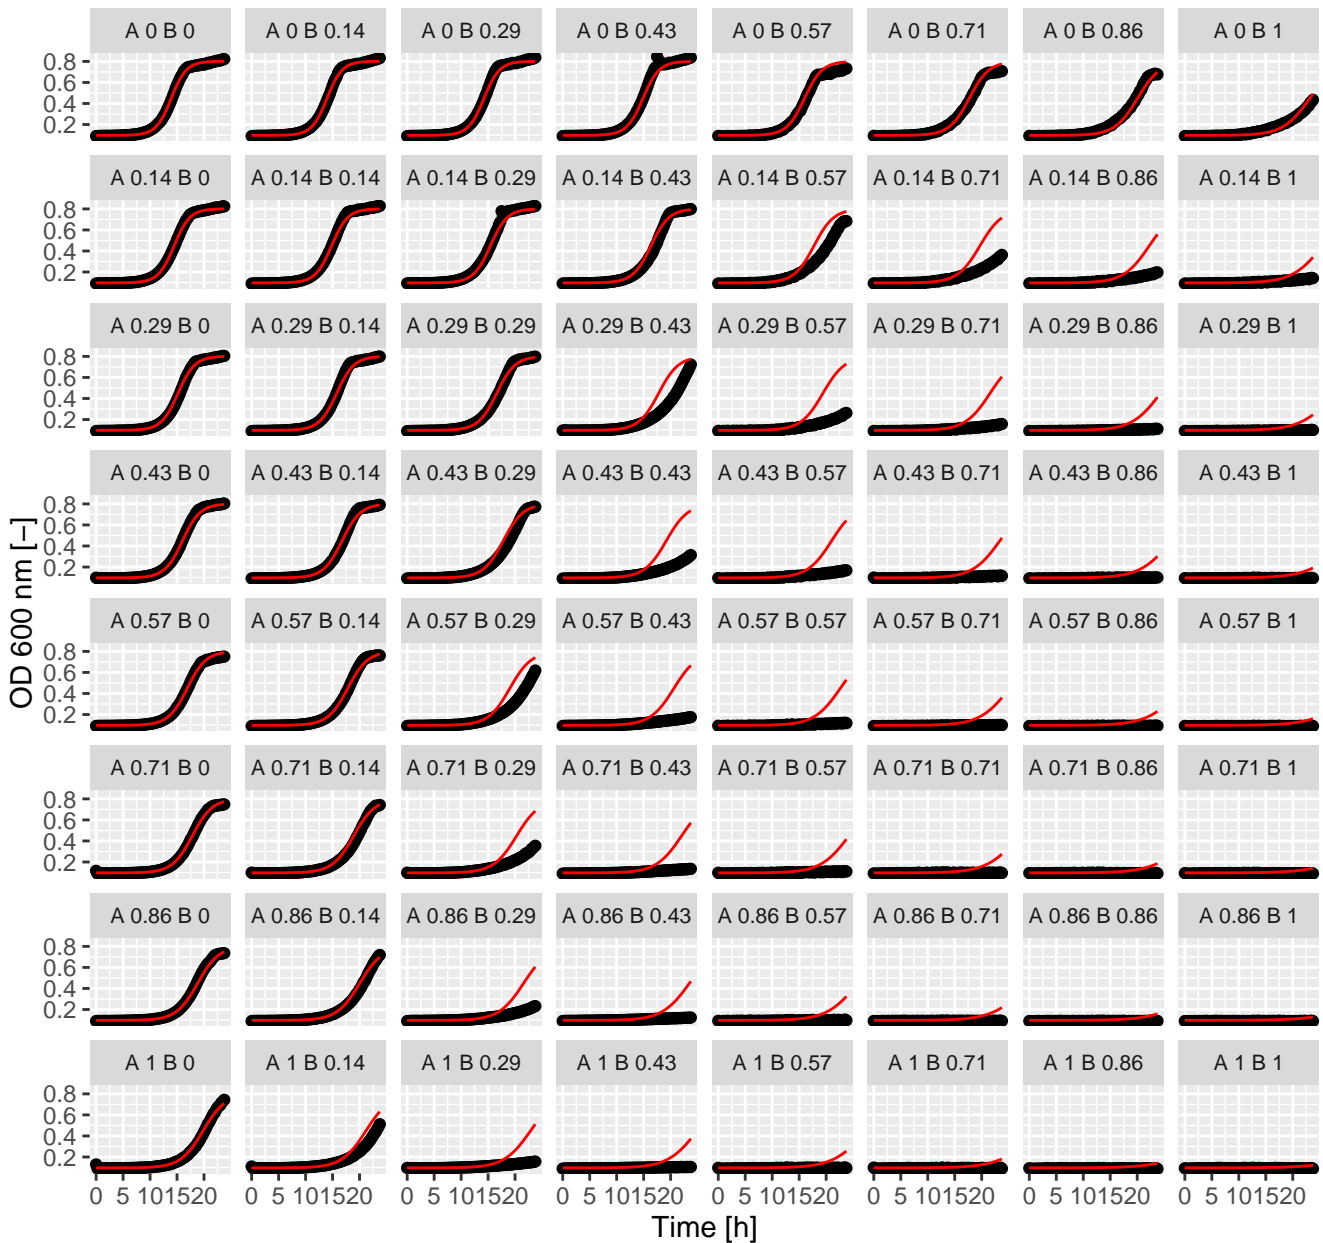

Hyg.Myr (= Ax.Bx) full GPDI  
Int\_AB = 1.66 and Int\_BA = -0.82 at EC50

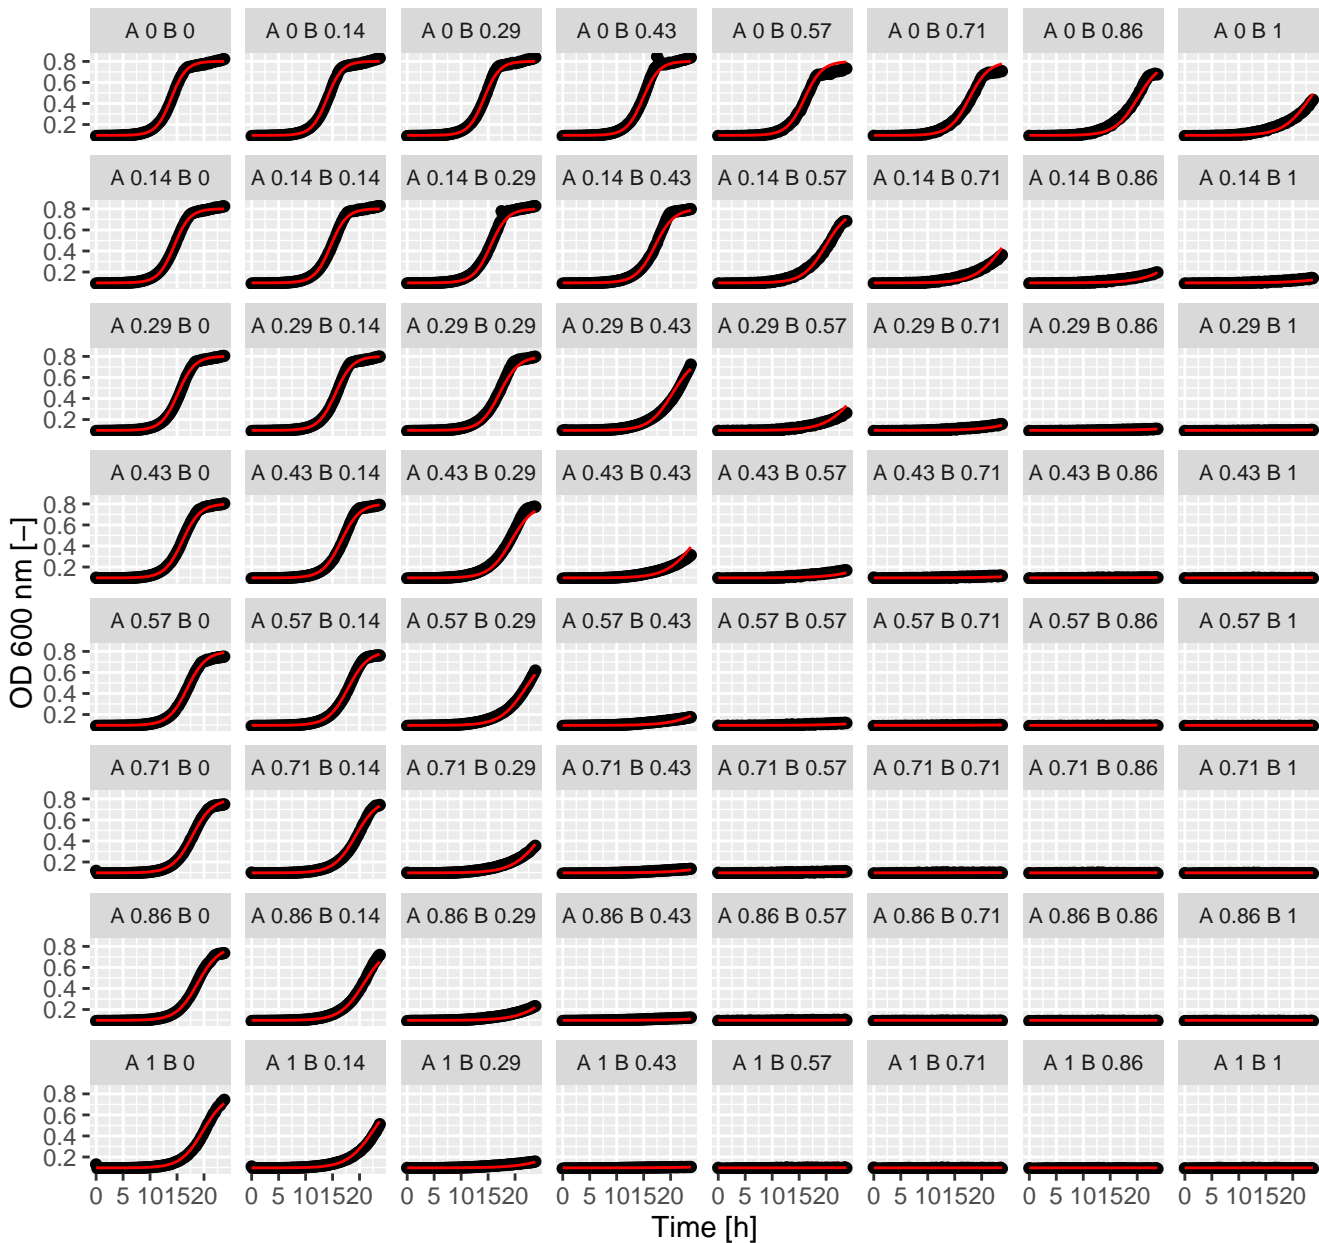



Hyg.Rad (= Ax.Bx) exp. additivity (LA)  
Int\_AB = 0 and Int\_BA = 0 at EC50

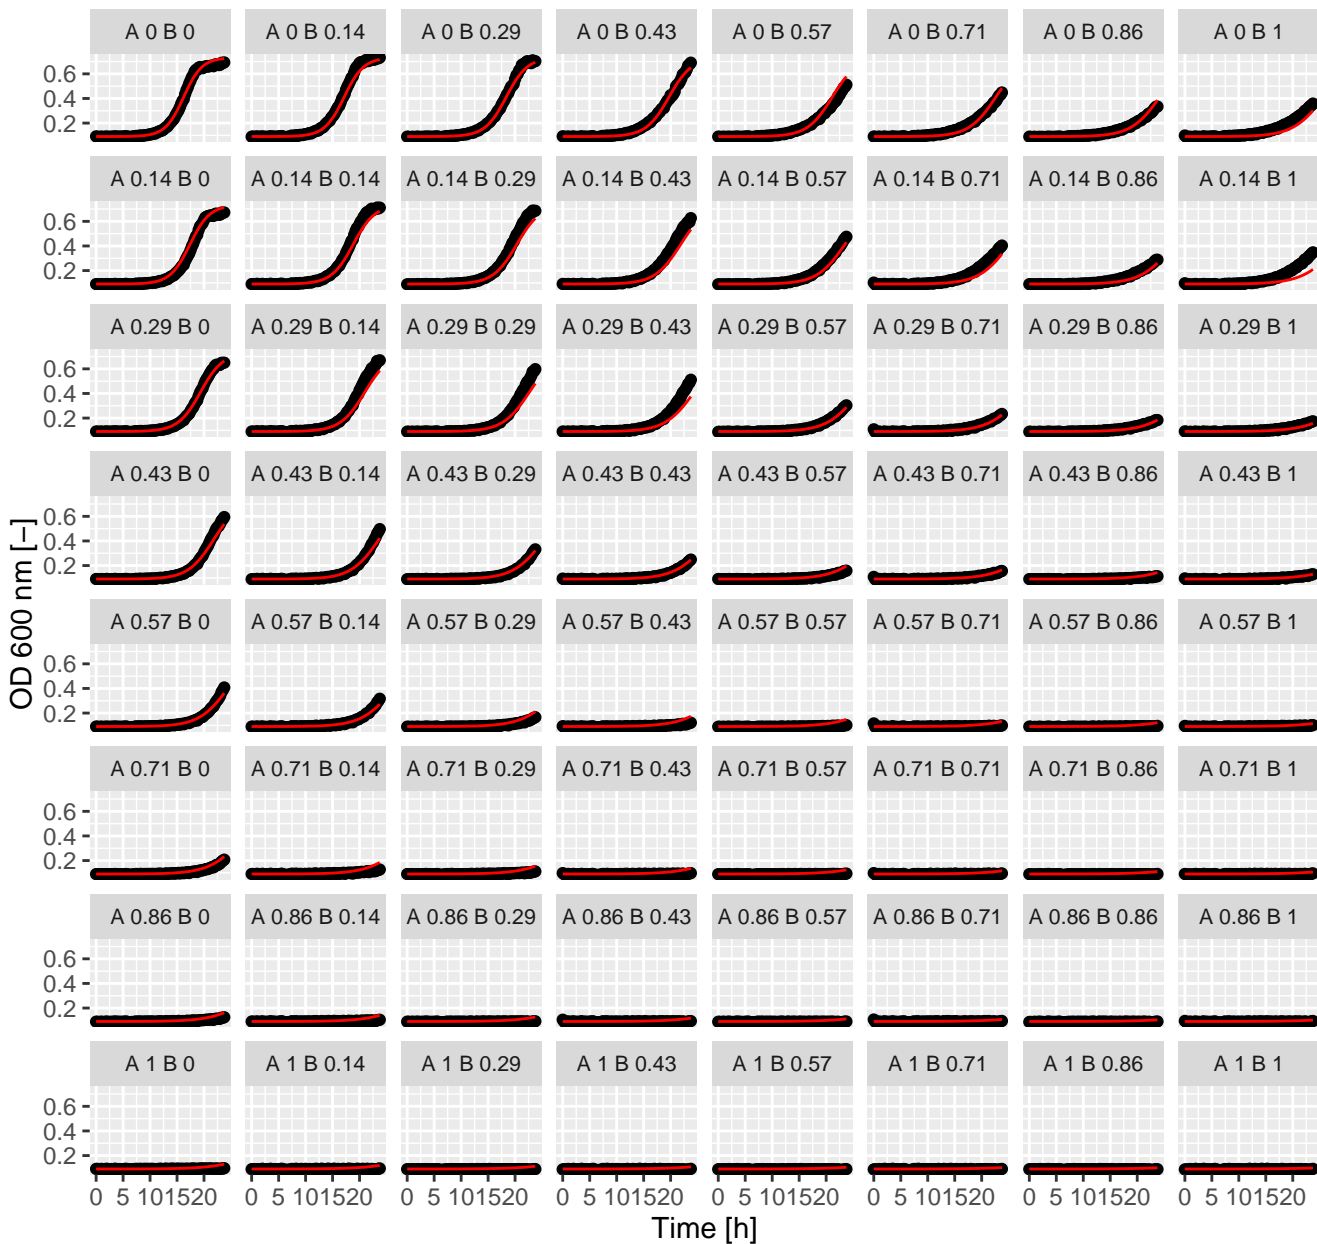

Hyg.Rad (= Ax.Bx) full GPDI  
Int\_AB = -0.5 and Int\_BA = 1.02 at EC50

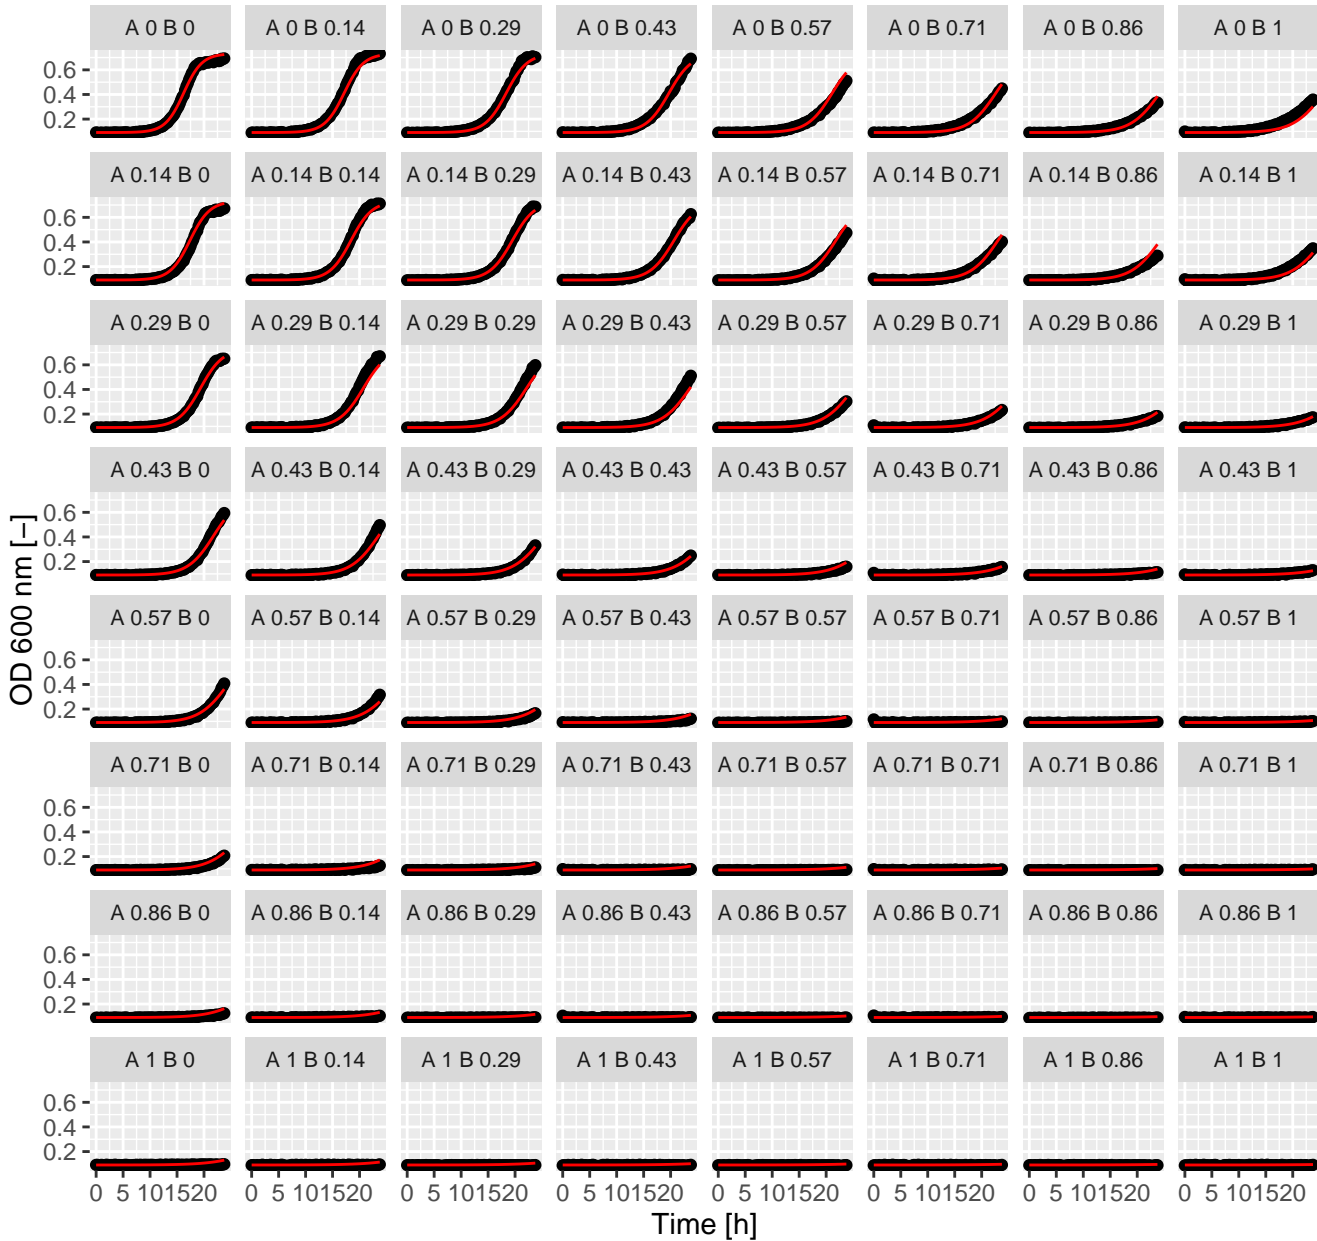

Hyg.Rap (= Ax.Bx) exp. additivity (LA)  
Int\_AB = 0 and Int\_BA = 0 at EC50

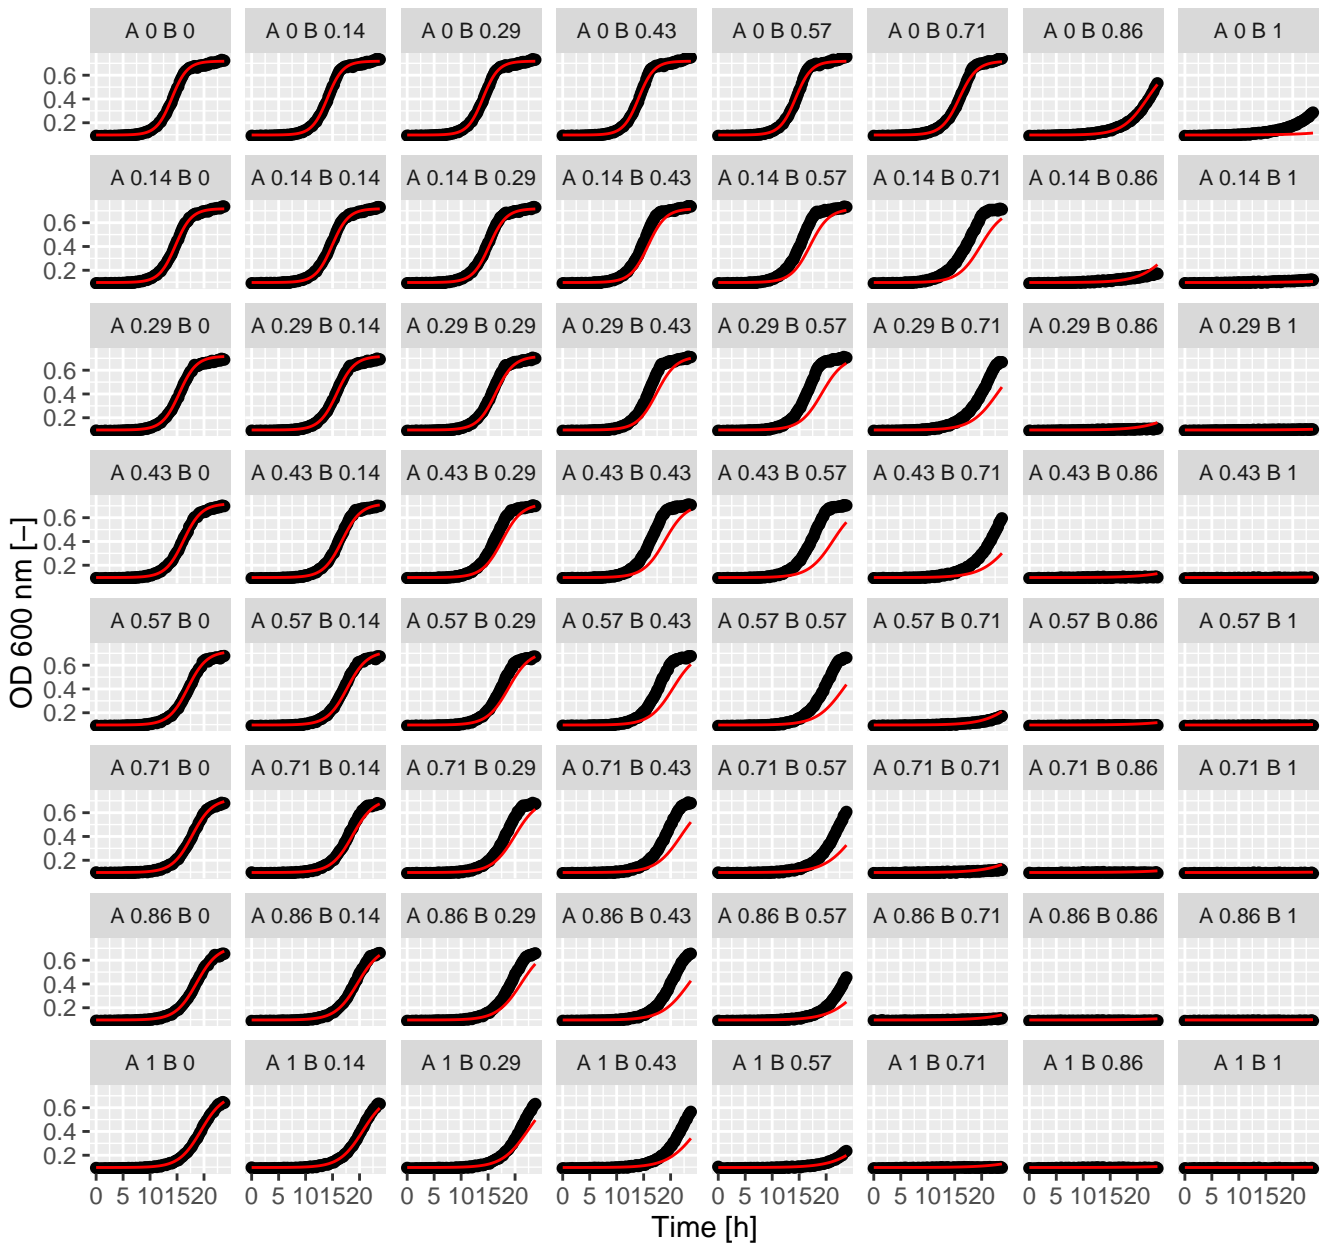

Hyg.Rap (= Ax.Bx) full GPDI  
Int\_AB = 2.16 and Int\_BA = -0.33 at EC50

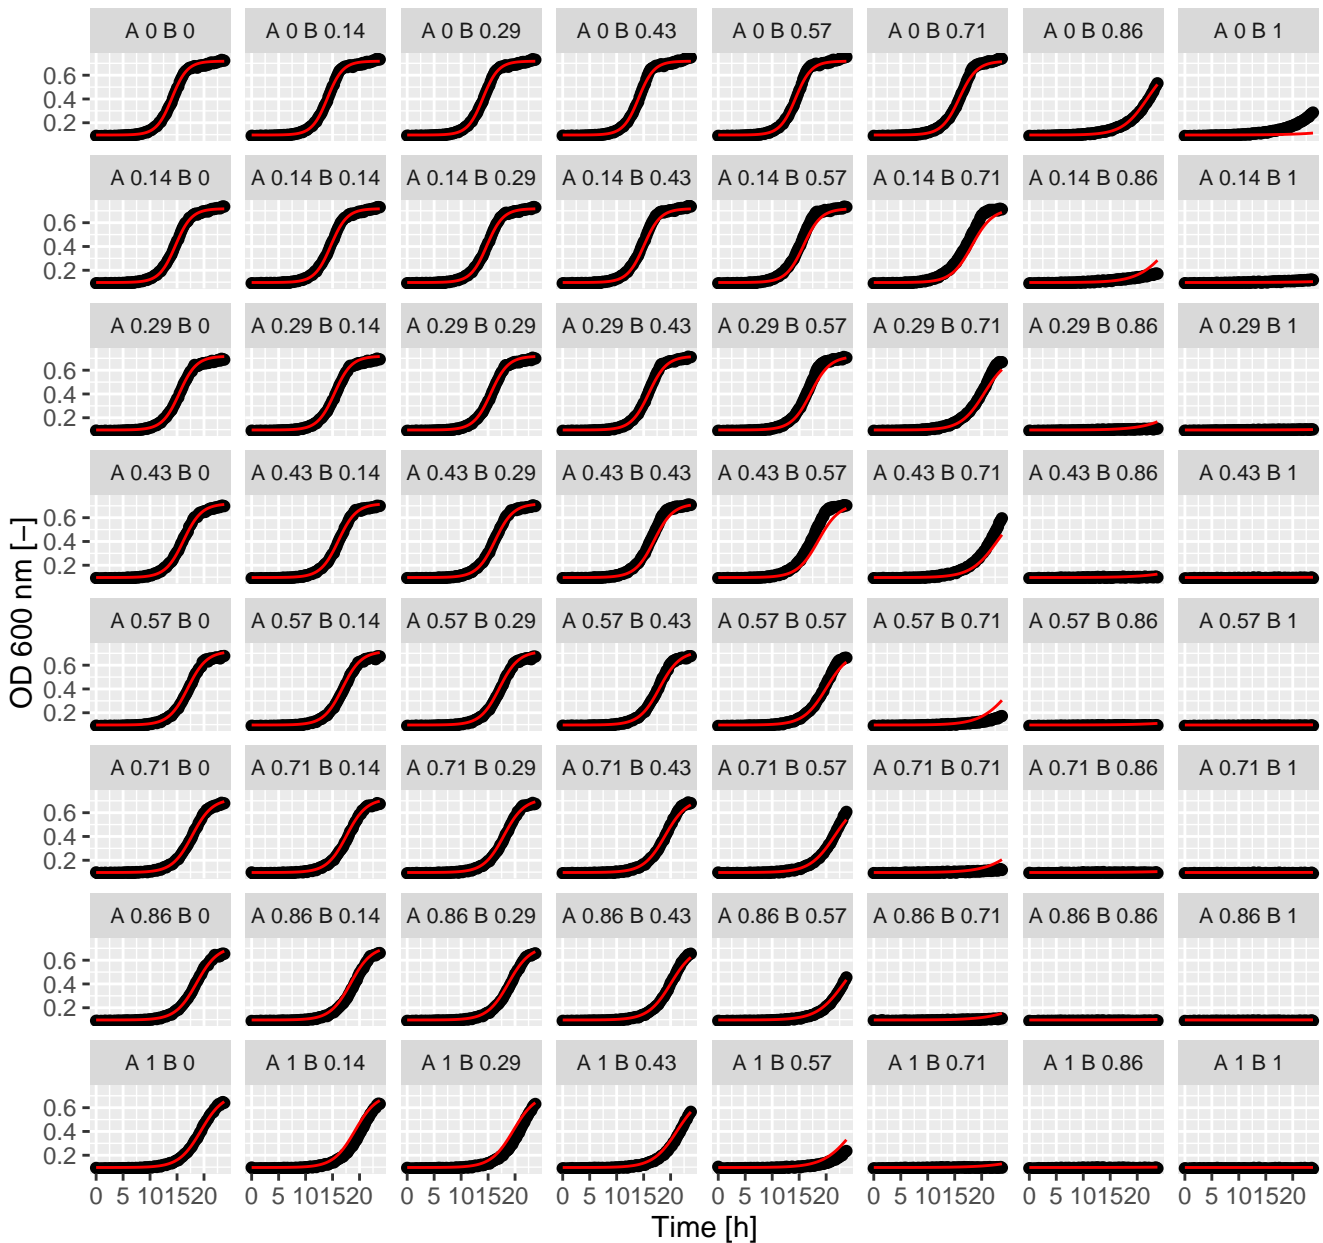

Hyg.Sta (= Ax.Bx) exp. additivity (LA)  
Int\_AB = 0 and Int\_BA = 0 at EC50

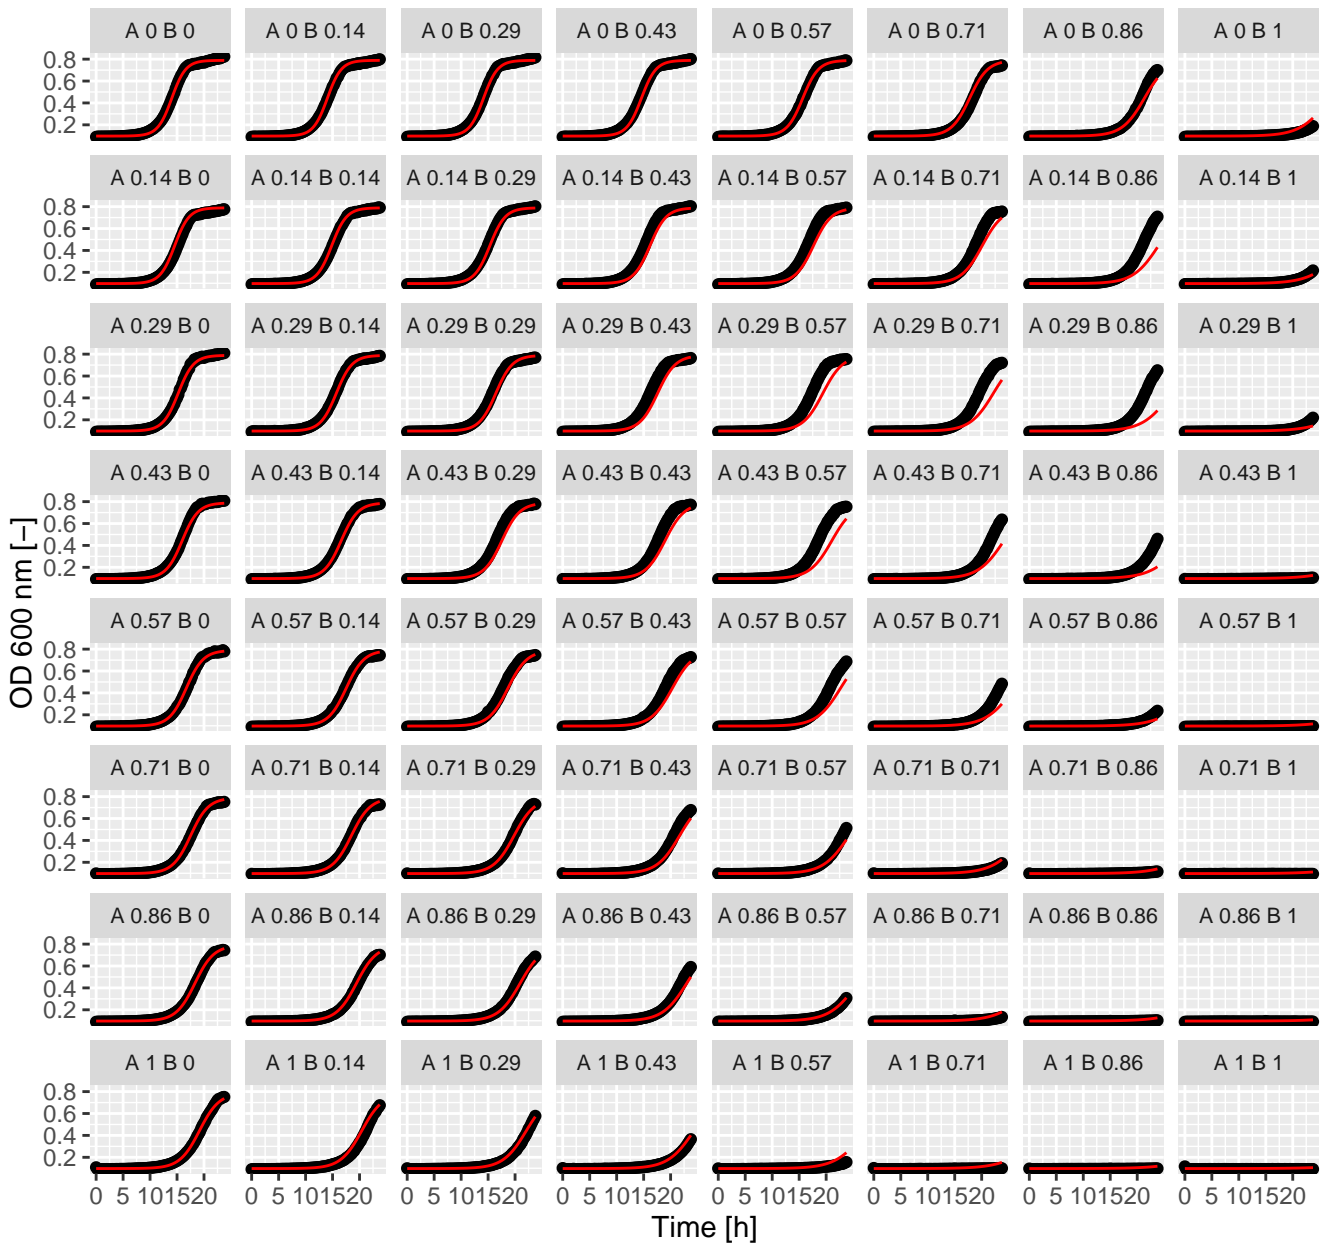

Hyg.Sta (= Ax.Bx) full GPDI  
Int\_AB = 0 and Int\_BA = 0.17 at EC50

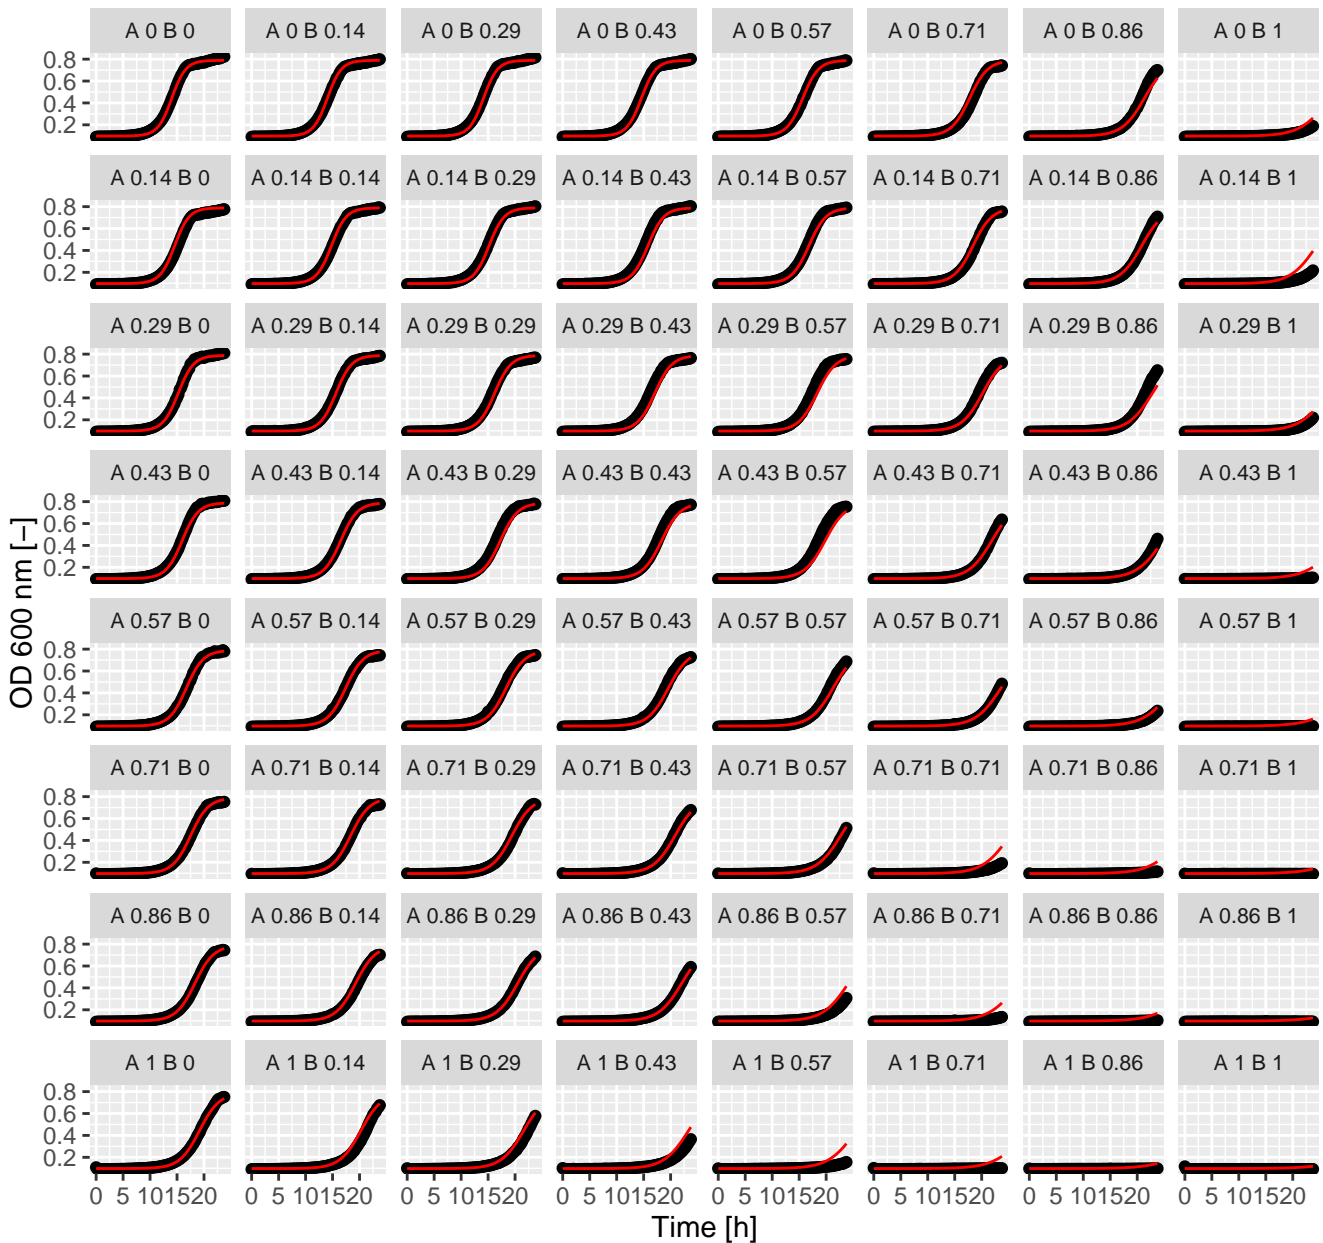

Lat.Lat (= Ax.Bx) exp. additivity (LA)  
Int\_AB = 0 and Int\_BA = 0 at EC50

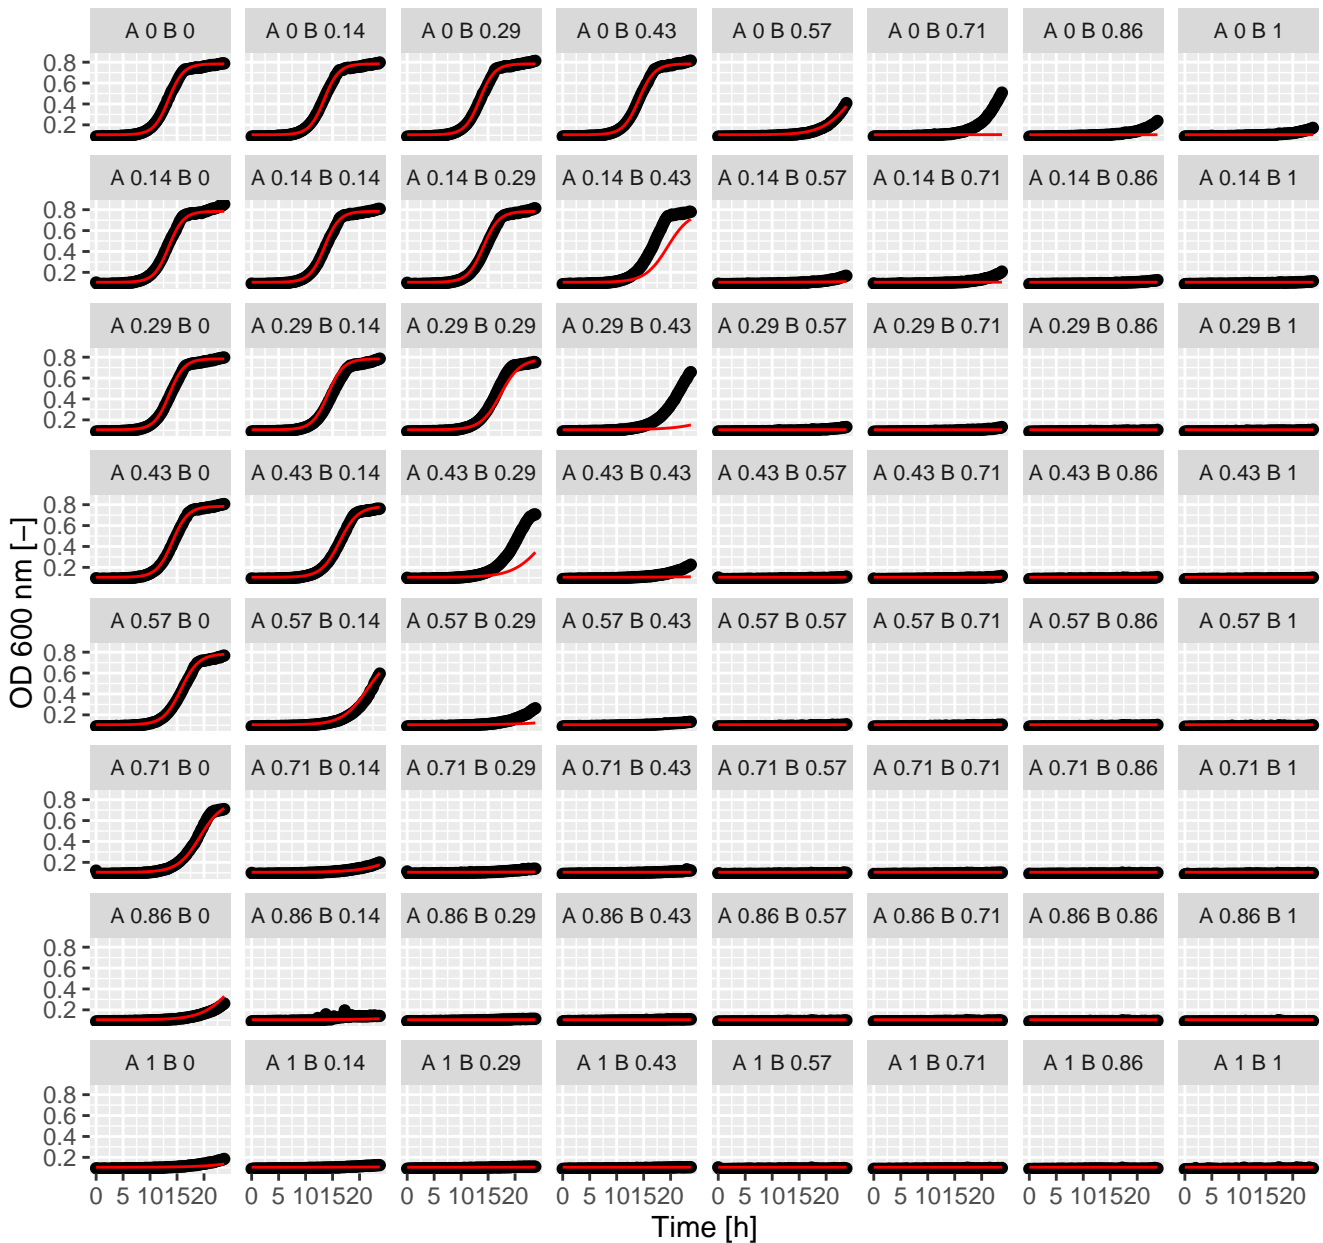

Lat.Lat (= Ax.Bx) full GPDI  
 Int\_AB = -0.09 and Int\_BA = 0.5 at EC50

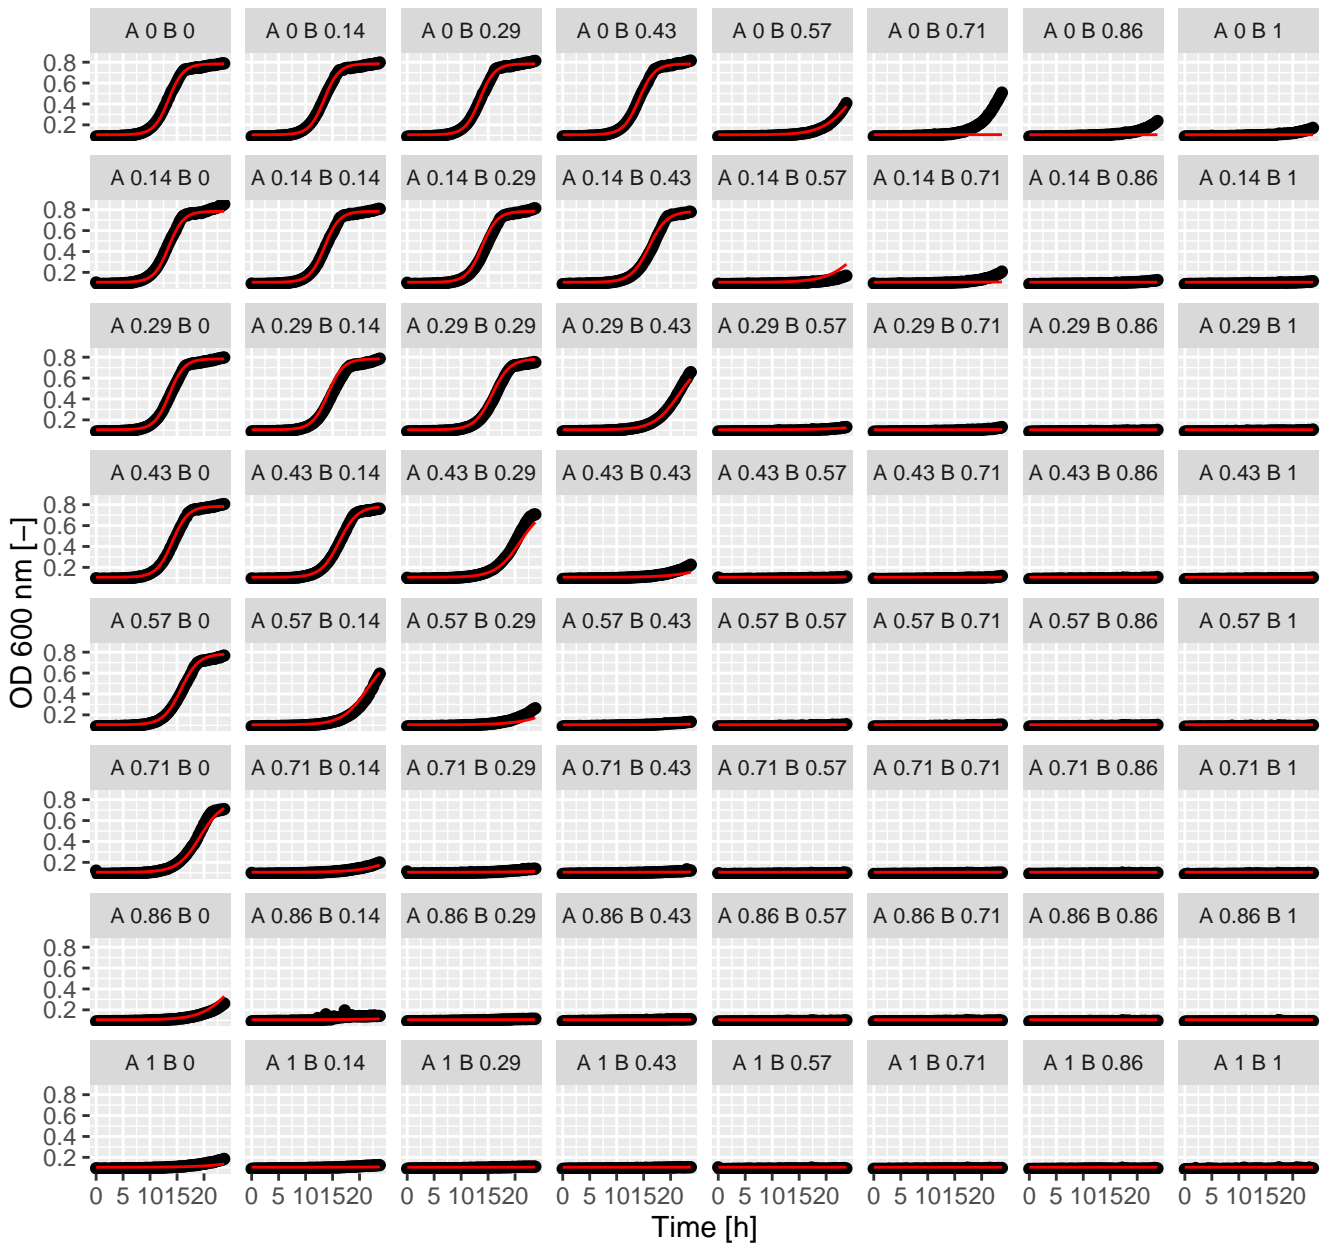



Lat.Met (= Ax.Bx) exp. additivity (LA)  
Int\_AB = 0 and Int\_BA = 0 at EC50

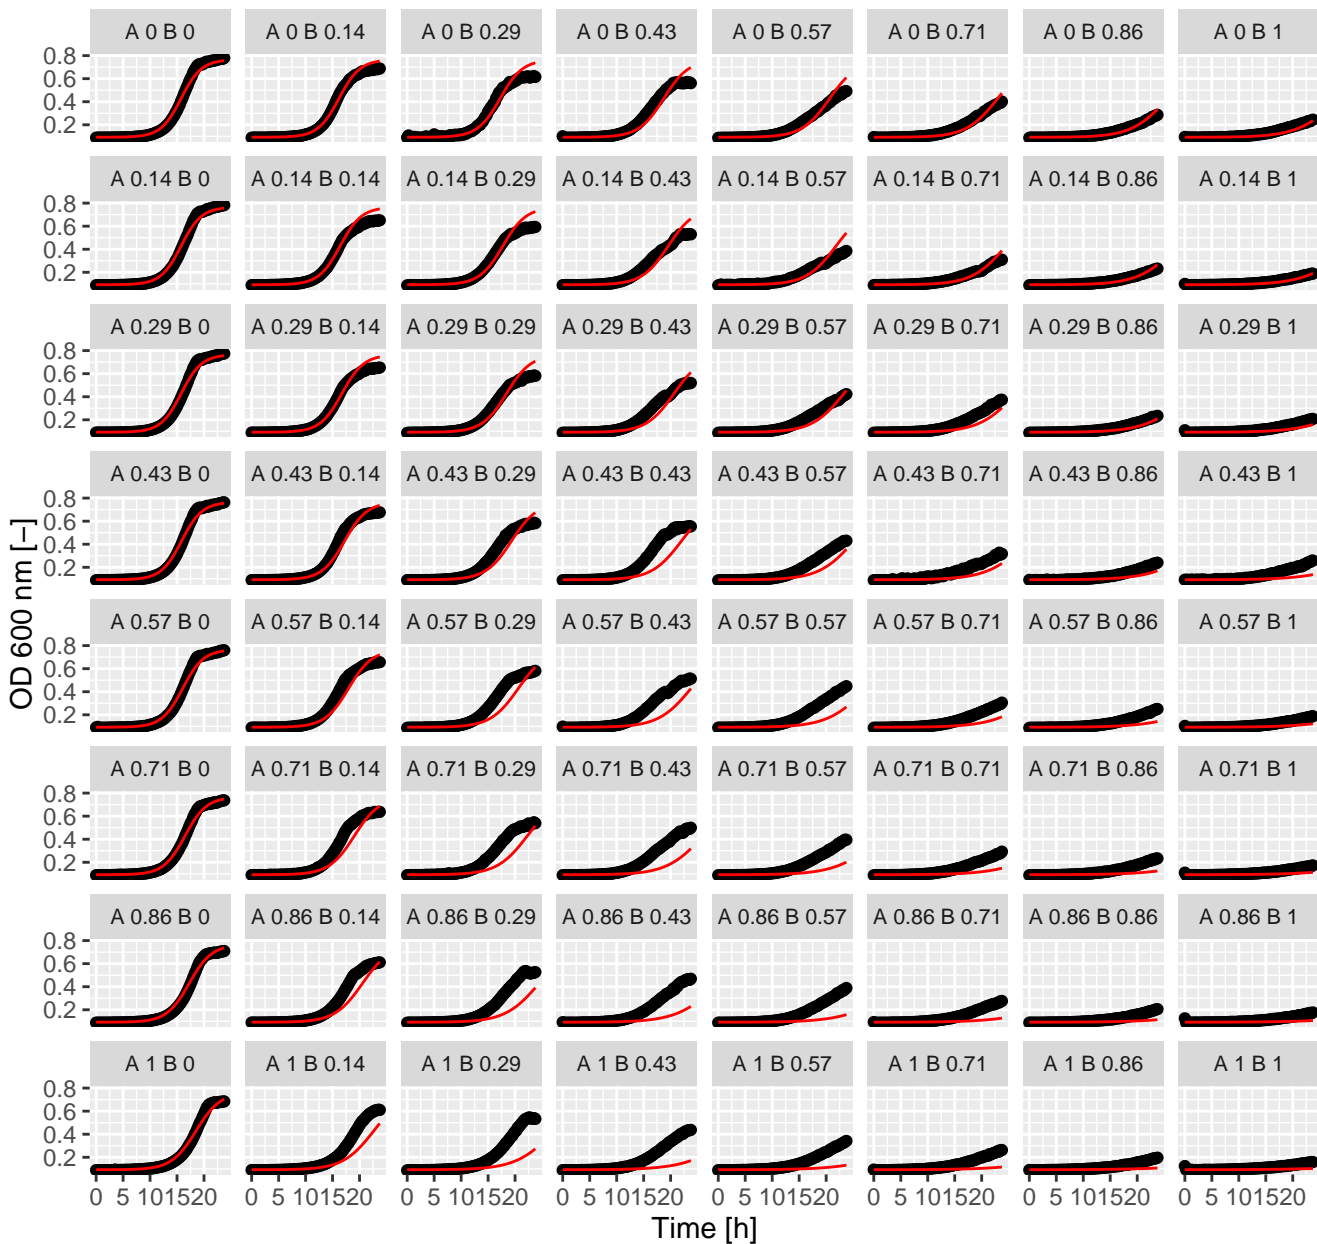

Lat.Met (= Ax.Bx) full GPDI  
Int\_AB = 2.35 and Int\_BA = 0.1 at EC50

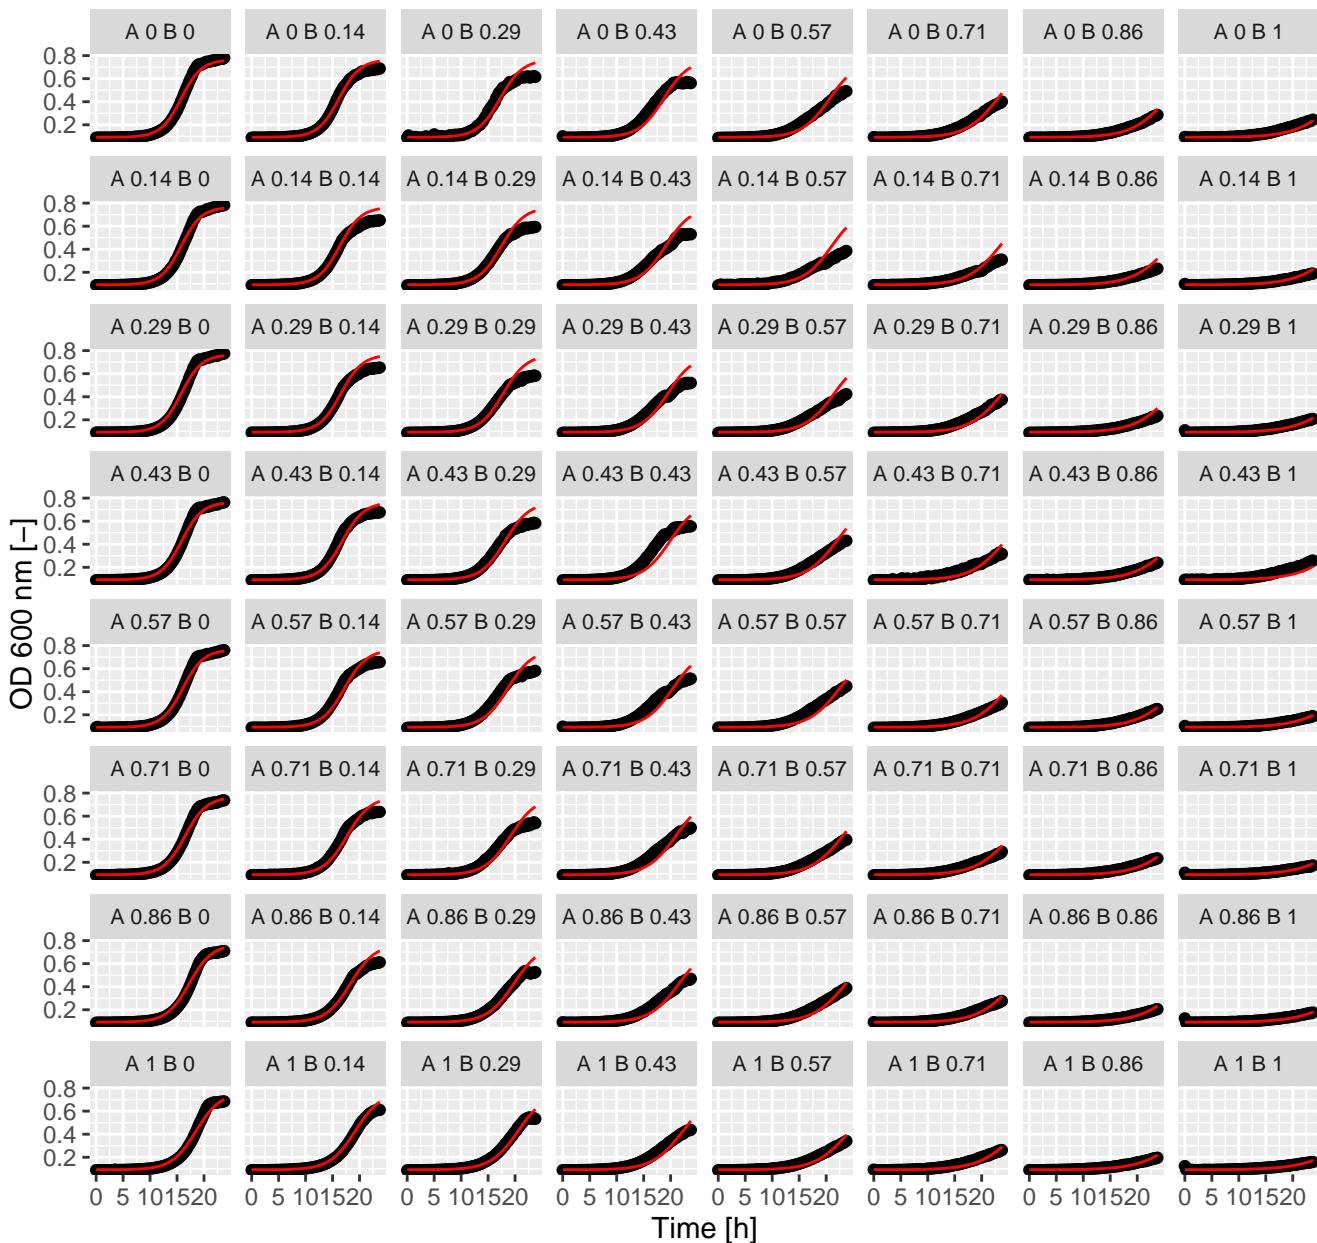

Lat.MMS (= Ax.Bx) exp. additivity (LA)  
Int\_AB = 0 and Int\_BA = 0 at EC50

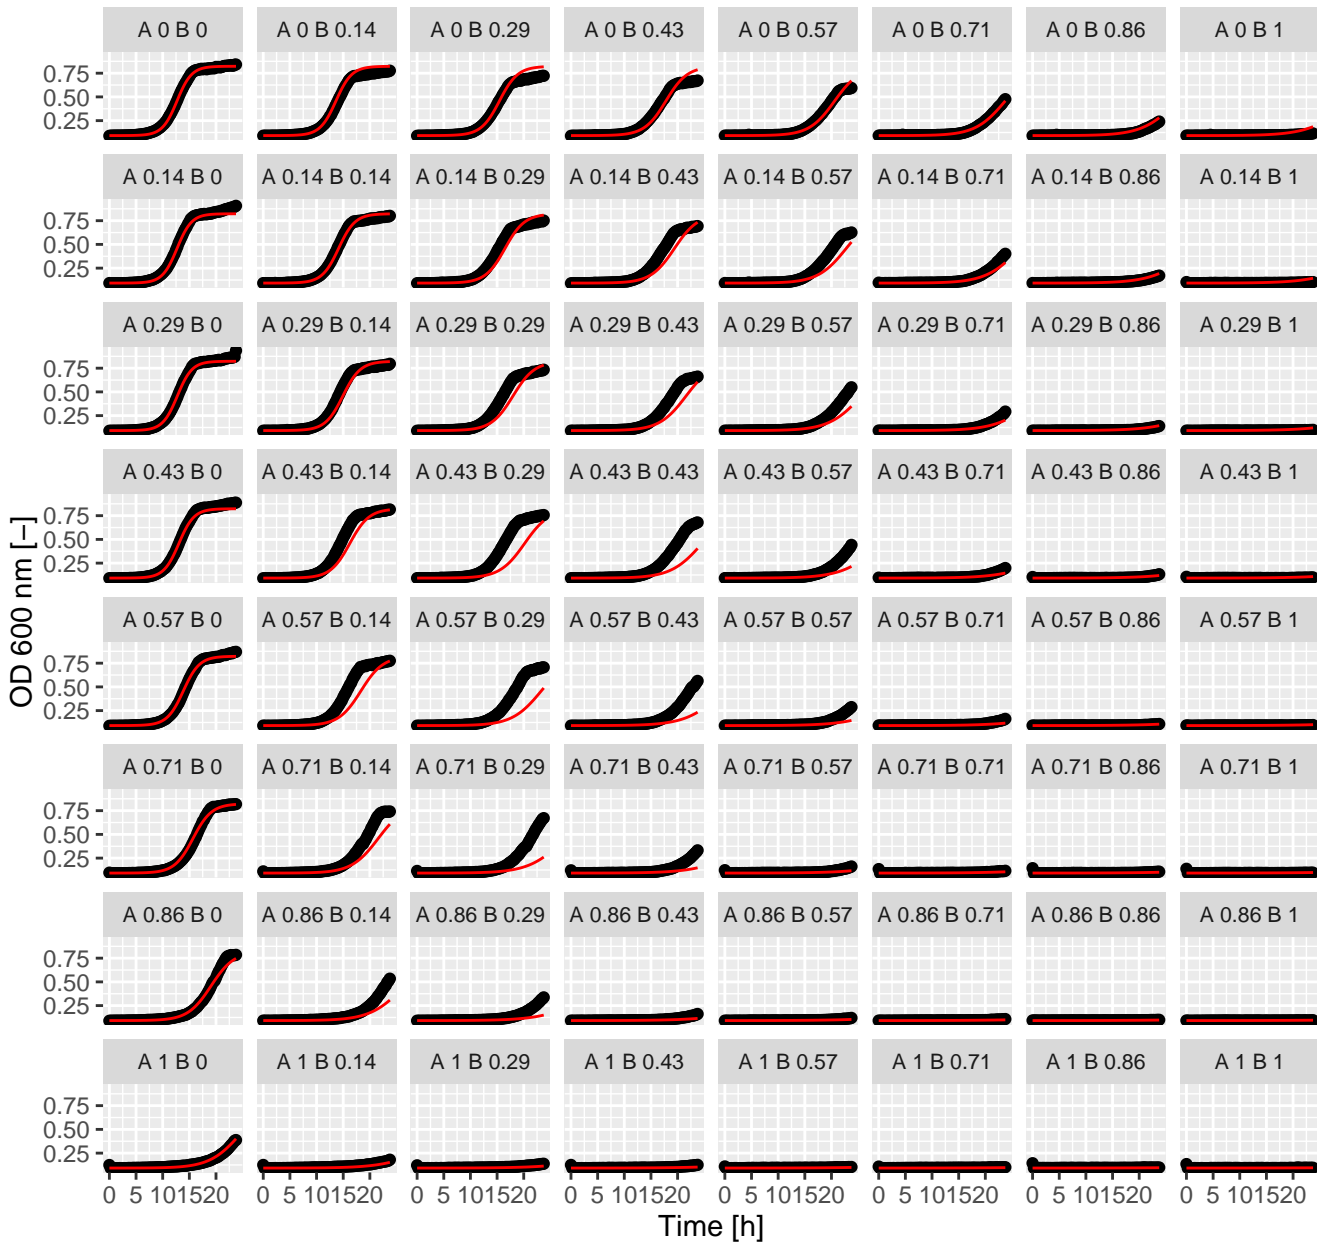

Lat.MMS (= Ax.Bx) full GPDI  
Int\_AB = 0.06 and Int\_BA = 0.75 at EC50

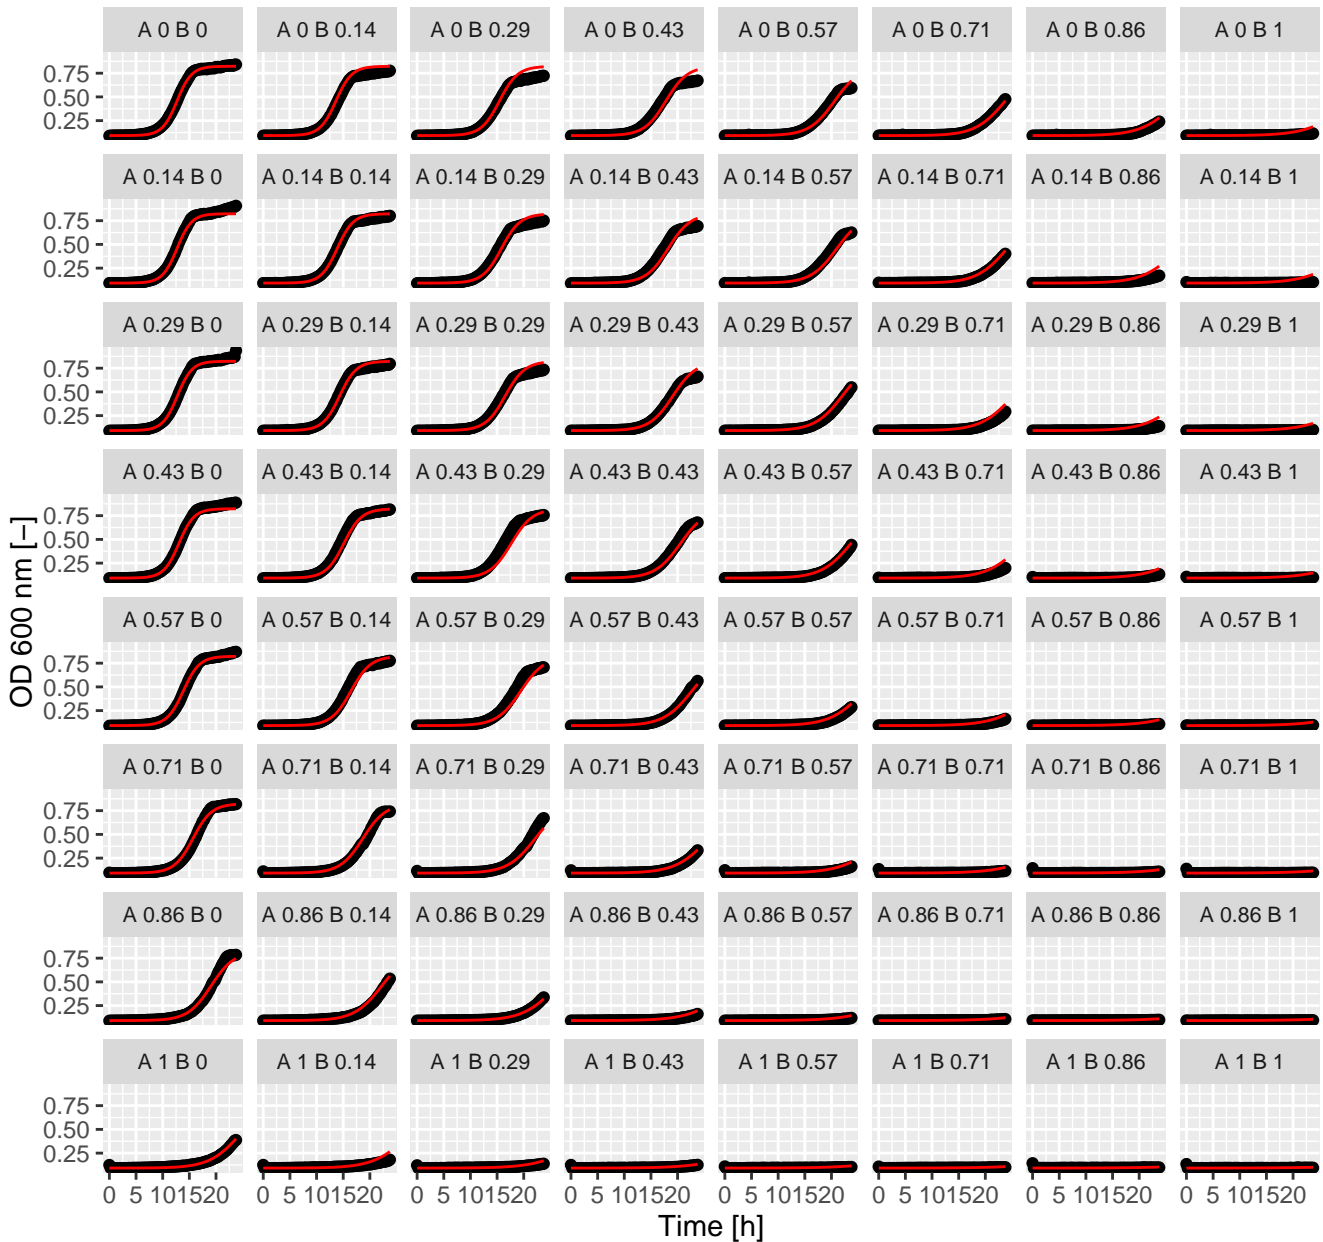

Lat.Myr (= Ax.Bx) exp. additivity (LA)  
Int\_AB = 0 and Int\_BA = 0 at EC50

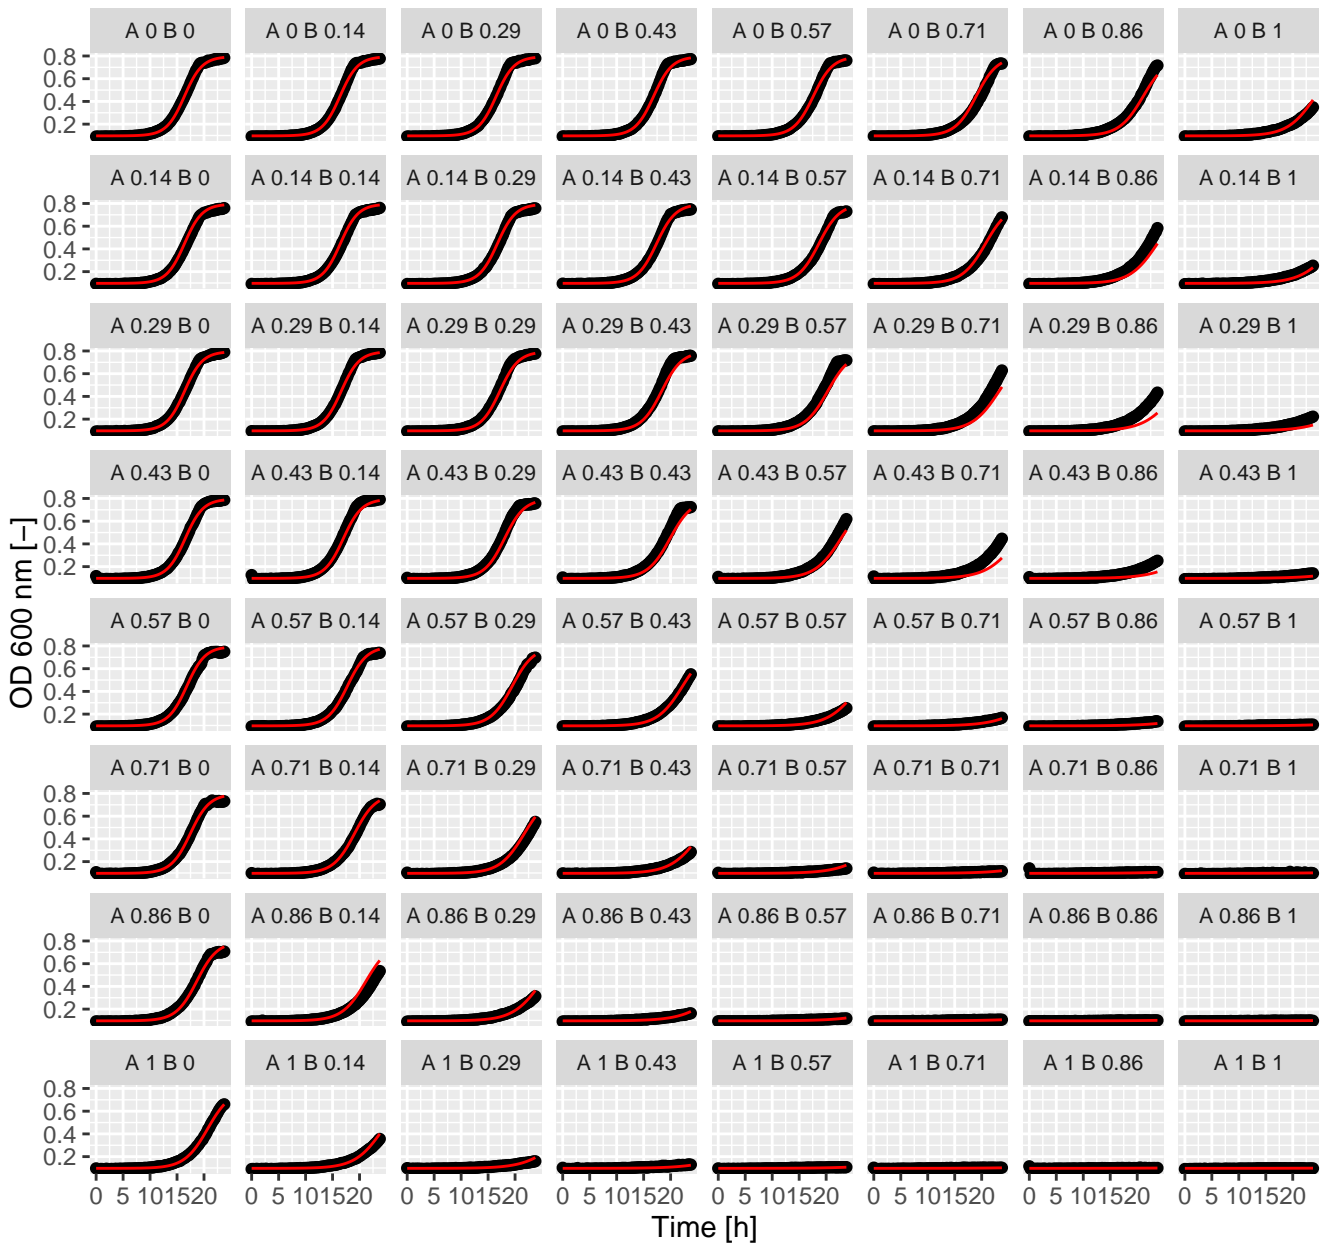

Lat. Myr (= Ax.Bx) full GPDI  
Int\_AB = -0.35 and Int\_BA = 1.48 at EC50

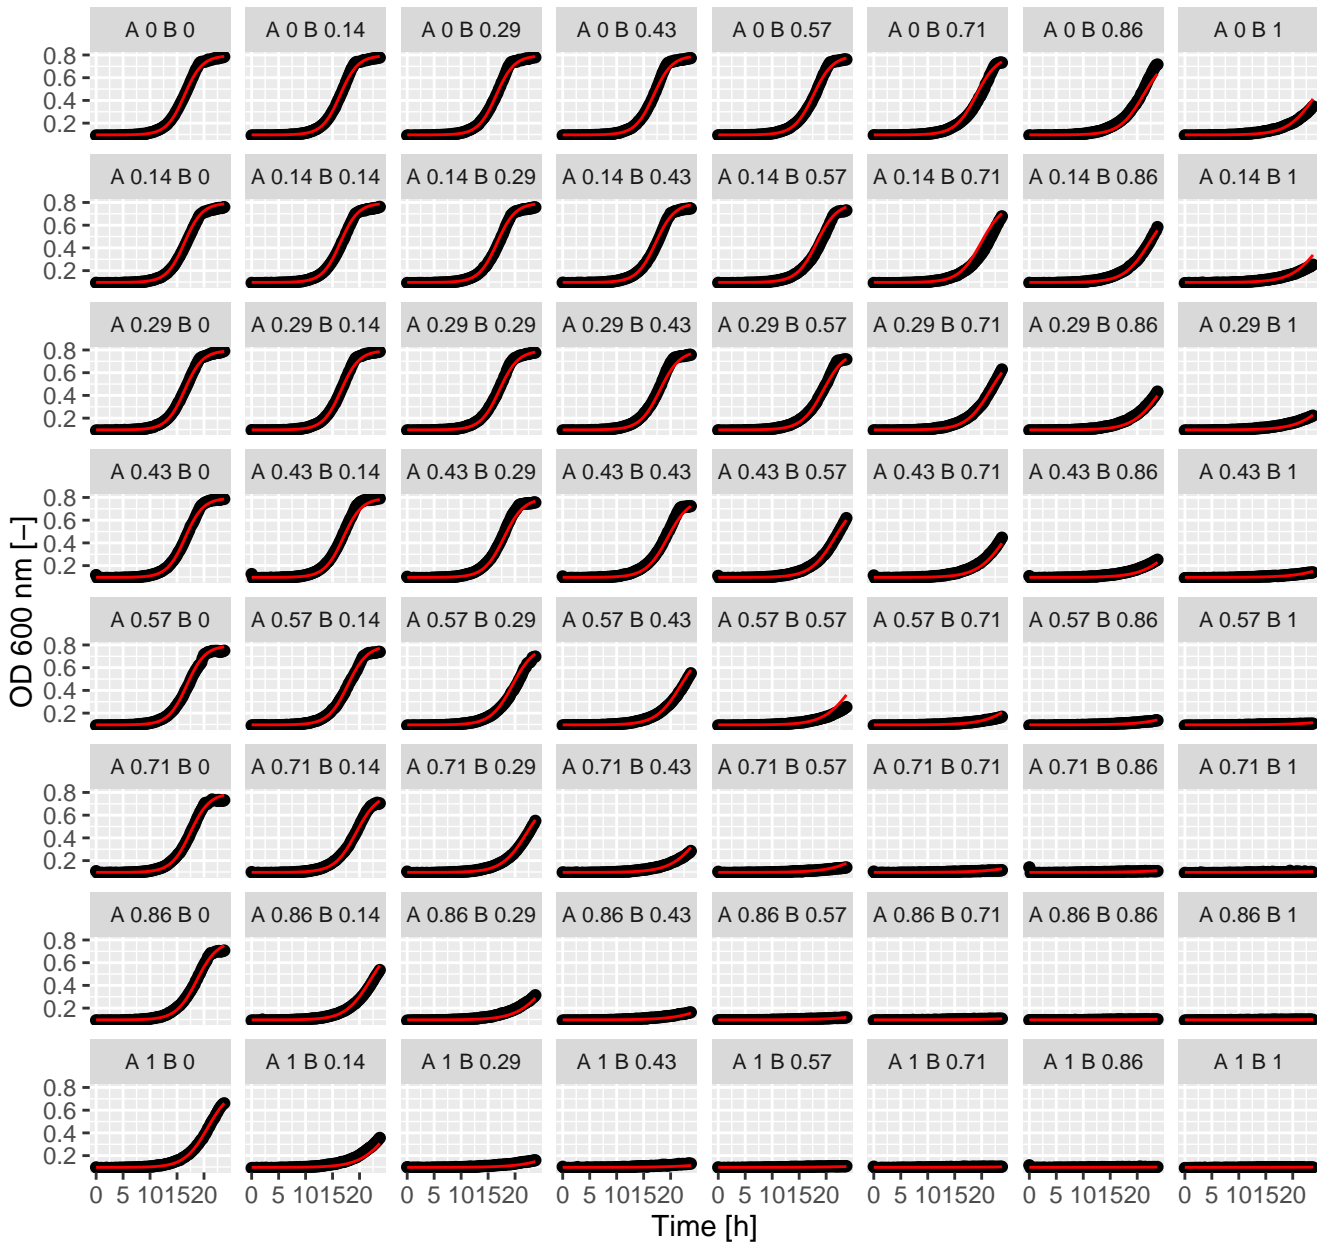

Lat.Pen (= Ax.Bx) exp. additivity (LA)  
Int\_AB = 0 and Int\_BA = 0 at EC50

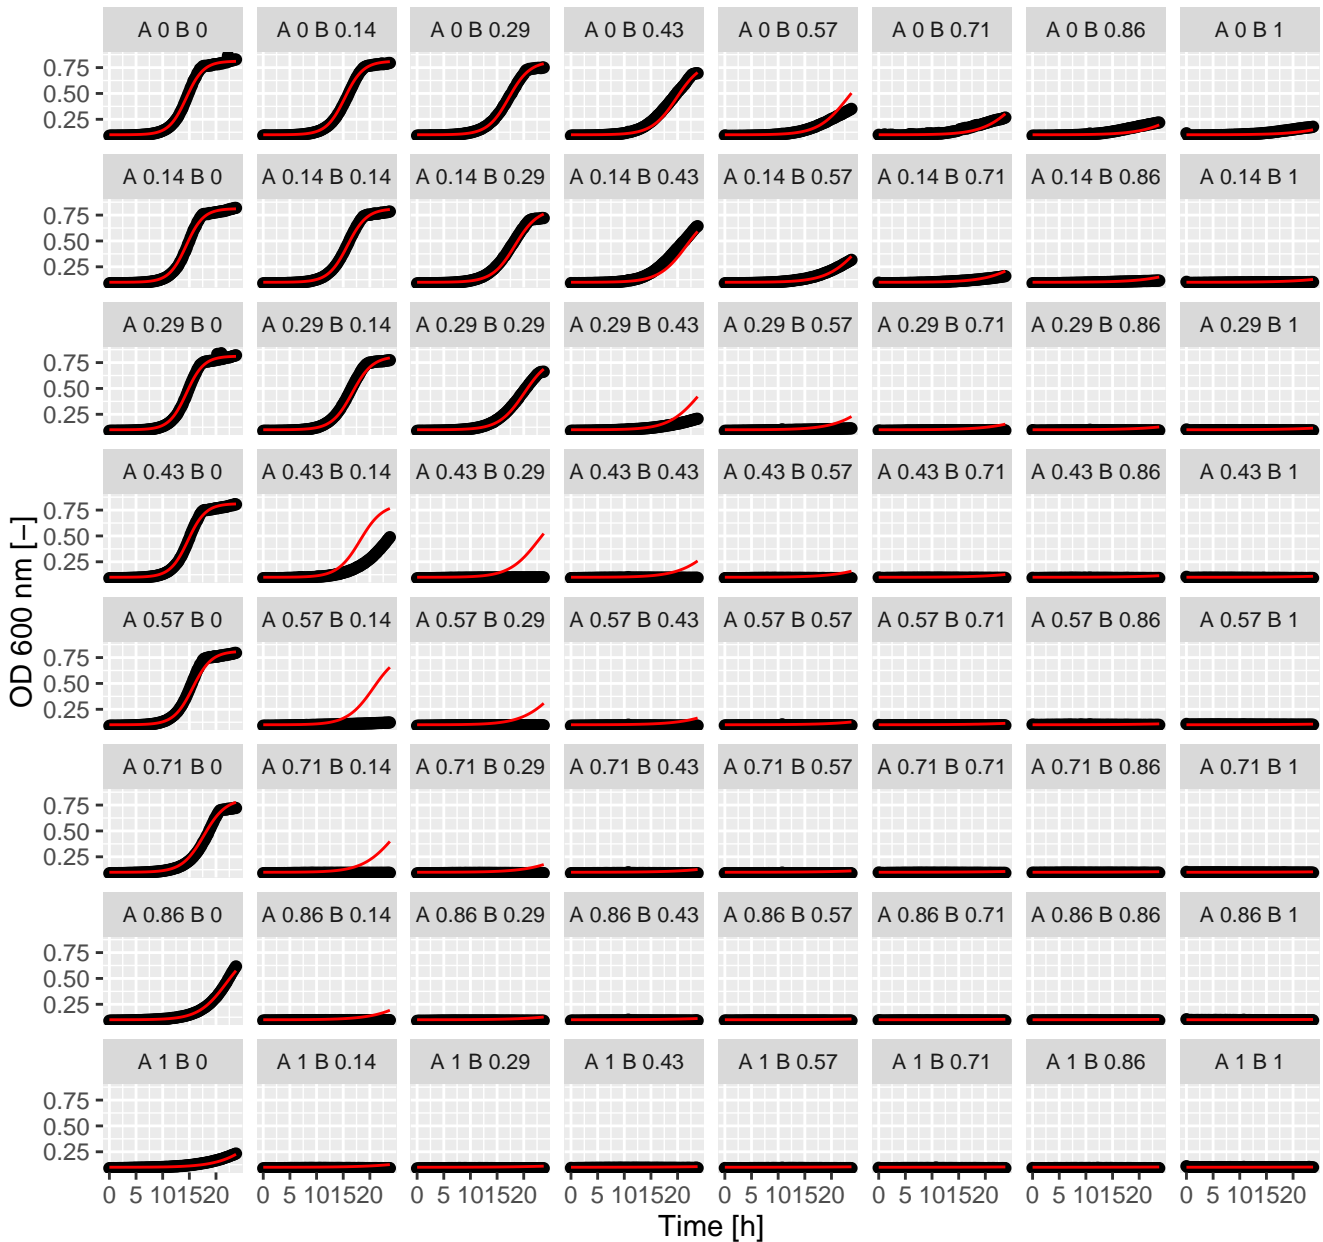

Lat.Pen (= Ax.Bx) full GPDI  
 Int\_AB = -0.22 and Int\_BA = -0.32 at EC50

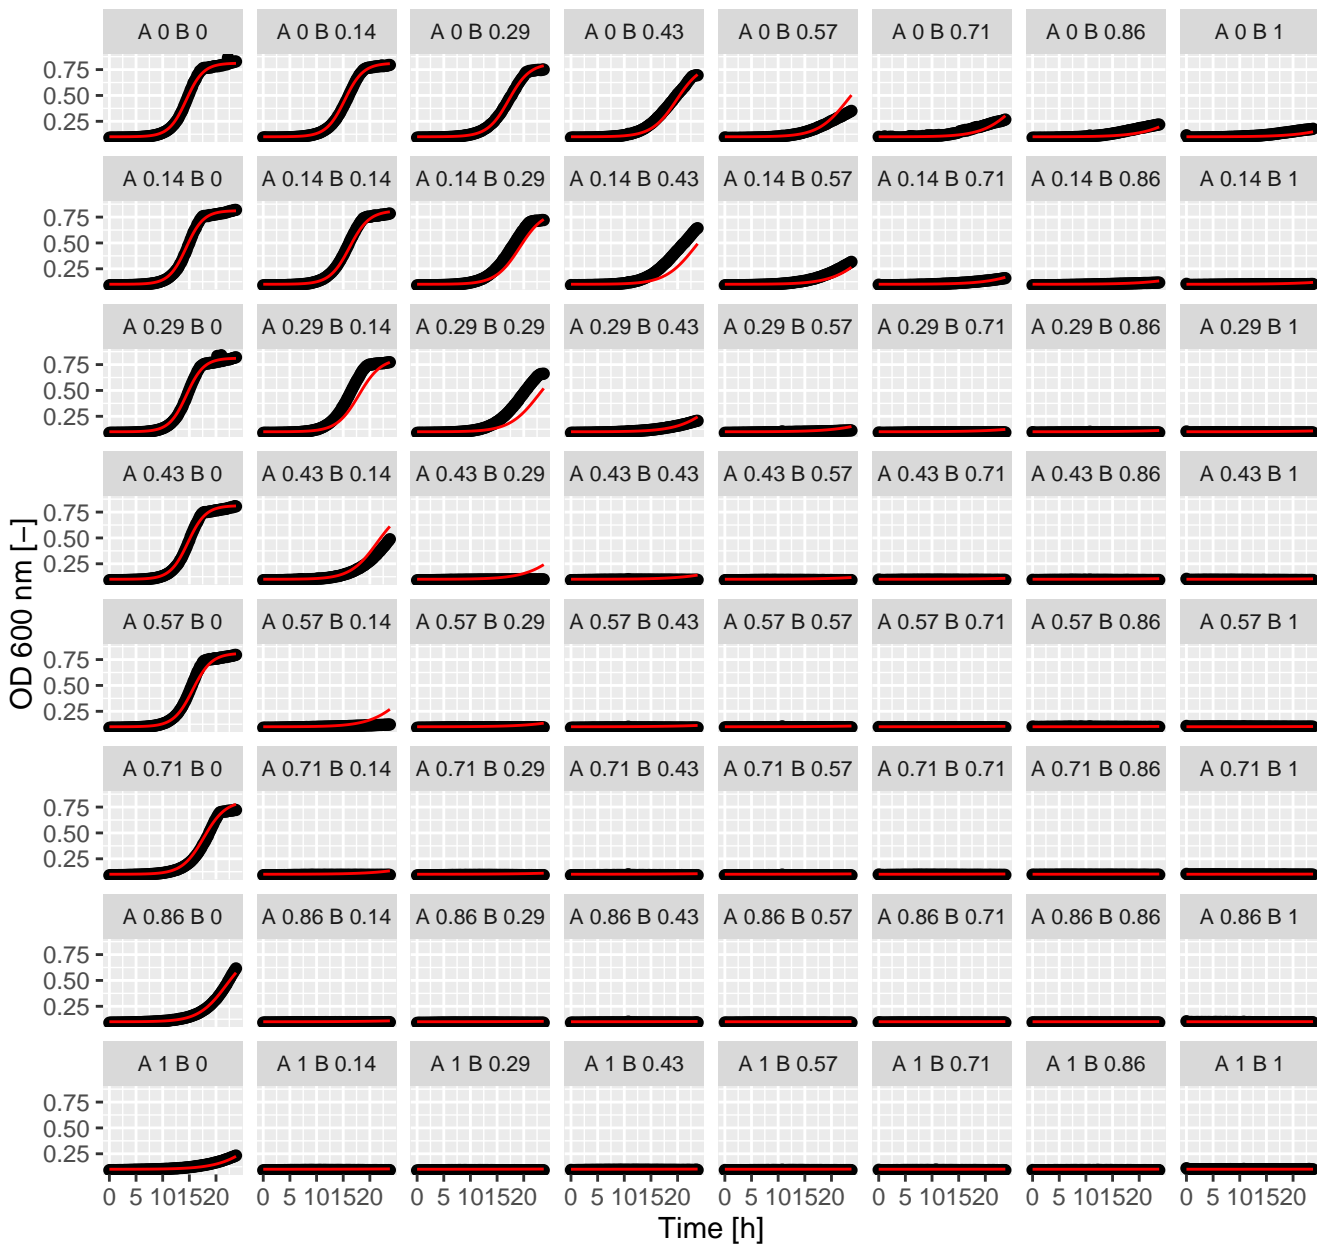



Lat.Qmy (= Ax.Bx) exp. additivity (LA)  
Int\_AB = 0 and Int\_BA = 0 at EC50

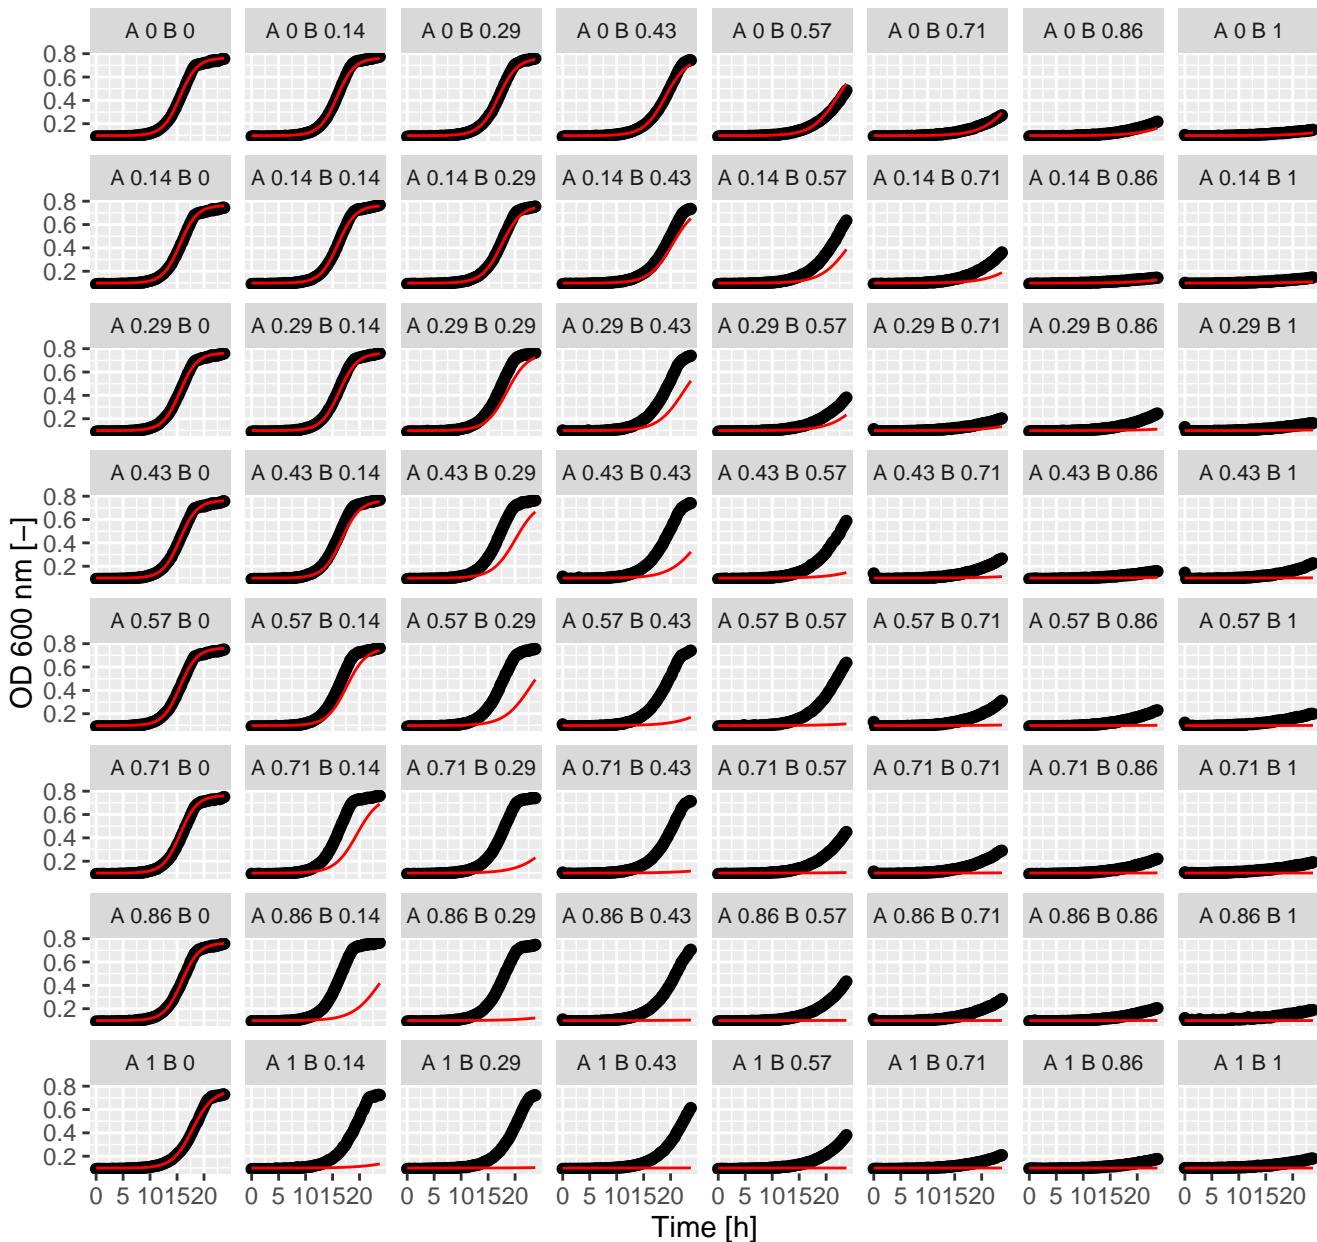

Lat.Qmy (= Ax.Bx) full GPDI  
Int\_AB = 0.94 and Int\_BA = 0.91 at EC50

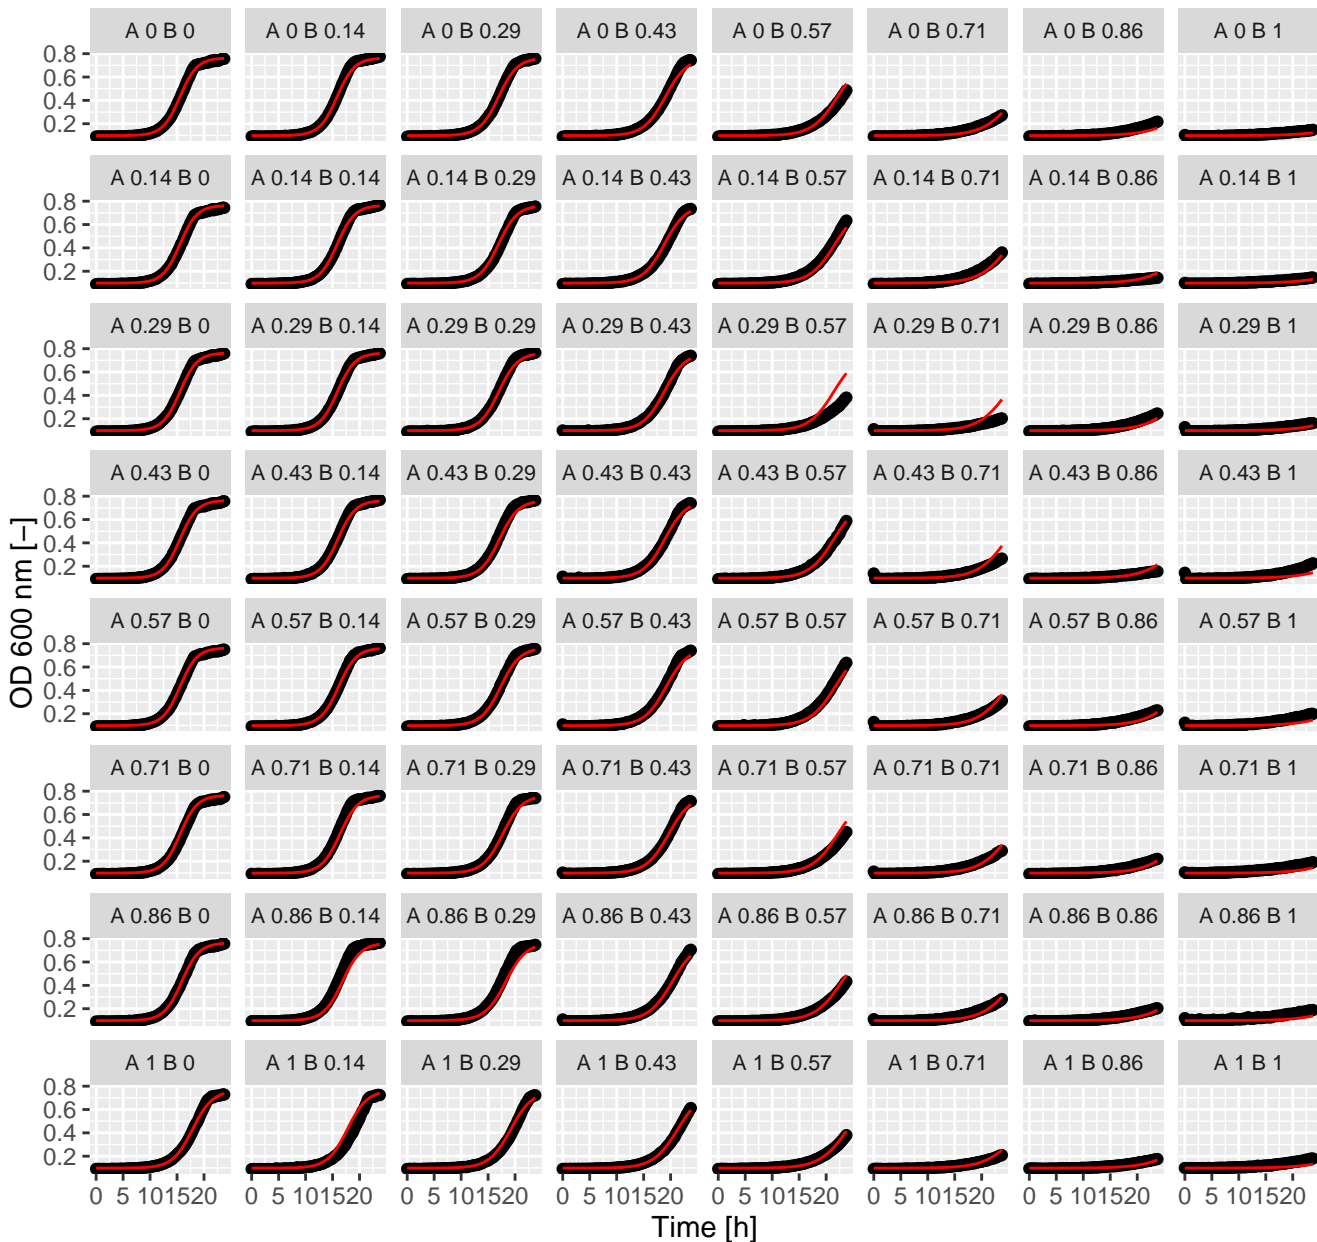

Lat.Rad (= Ax.Bx) exp. additivity (LA)  
Int\_AB = 0 and Int\_BA = 0 at EC50

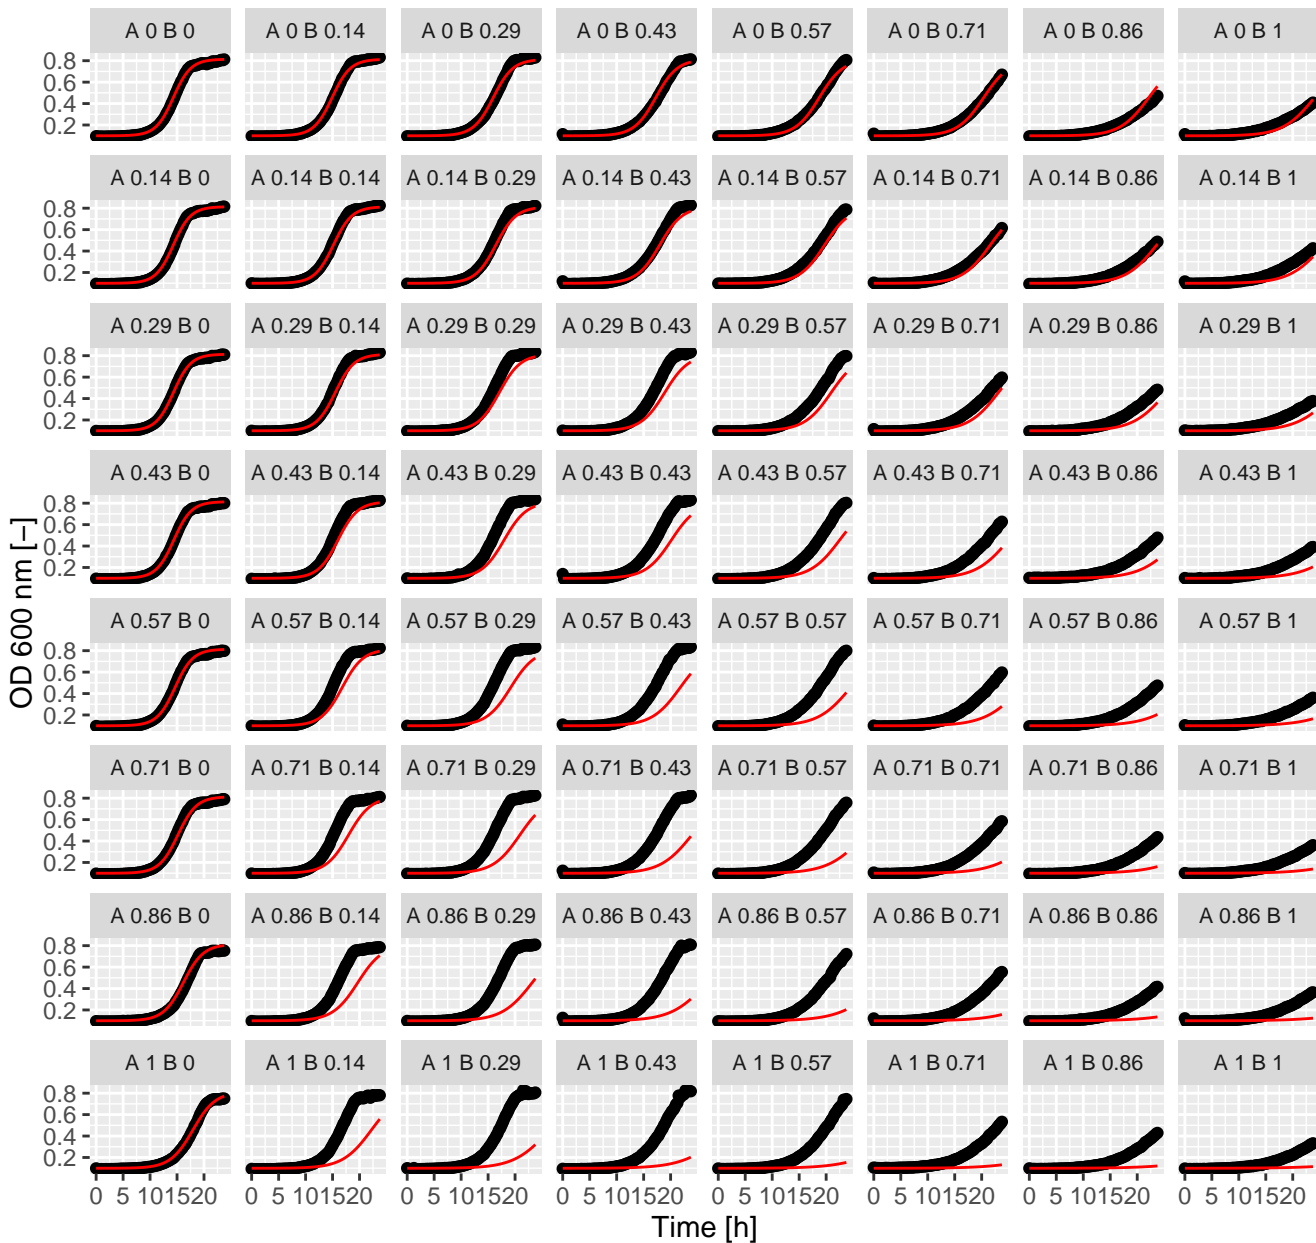

Lat.Rad (= Ax.Bx) full GPDI  
Int\_AB = 3.06 and Int\_BA = 0.13 at EC50

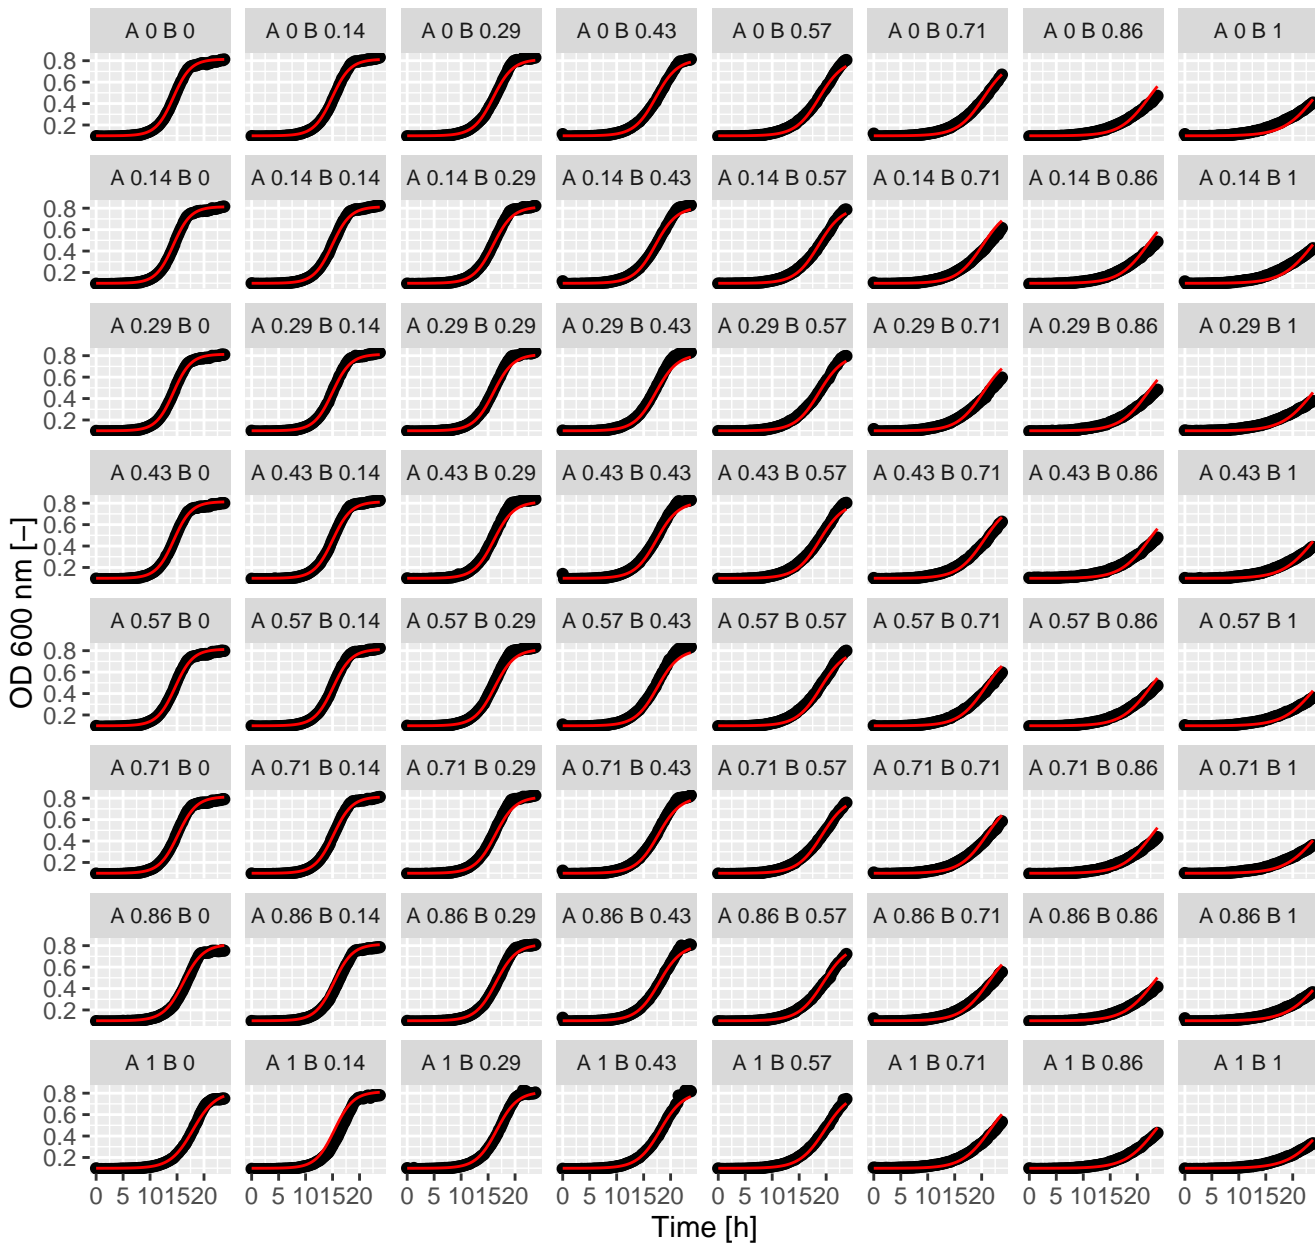

Lat.Rap (= Ax.Bx) exp. additivity (LA)  
Int\_AB = 0 and Int\_BA = 0 at EC50

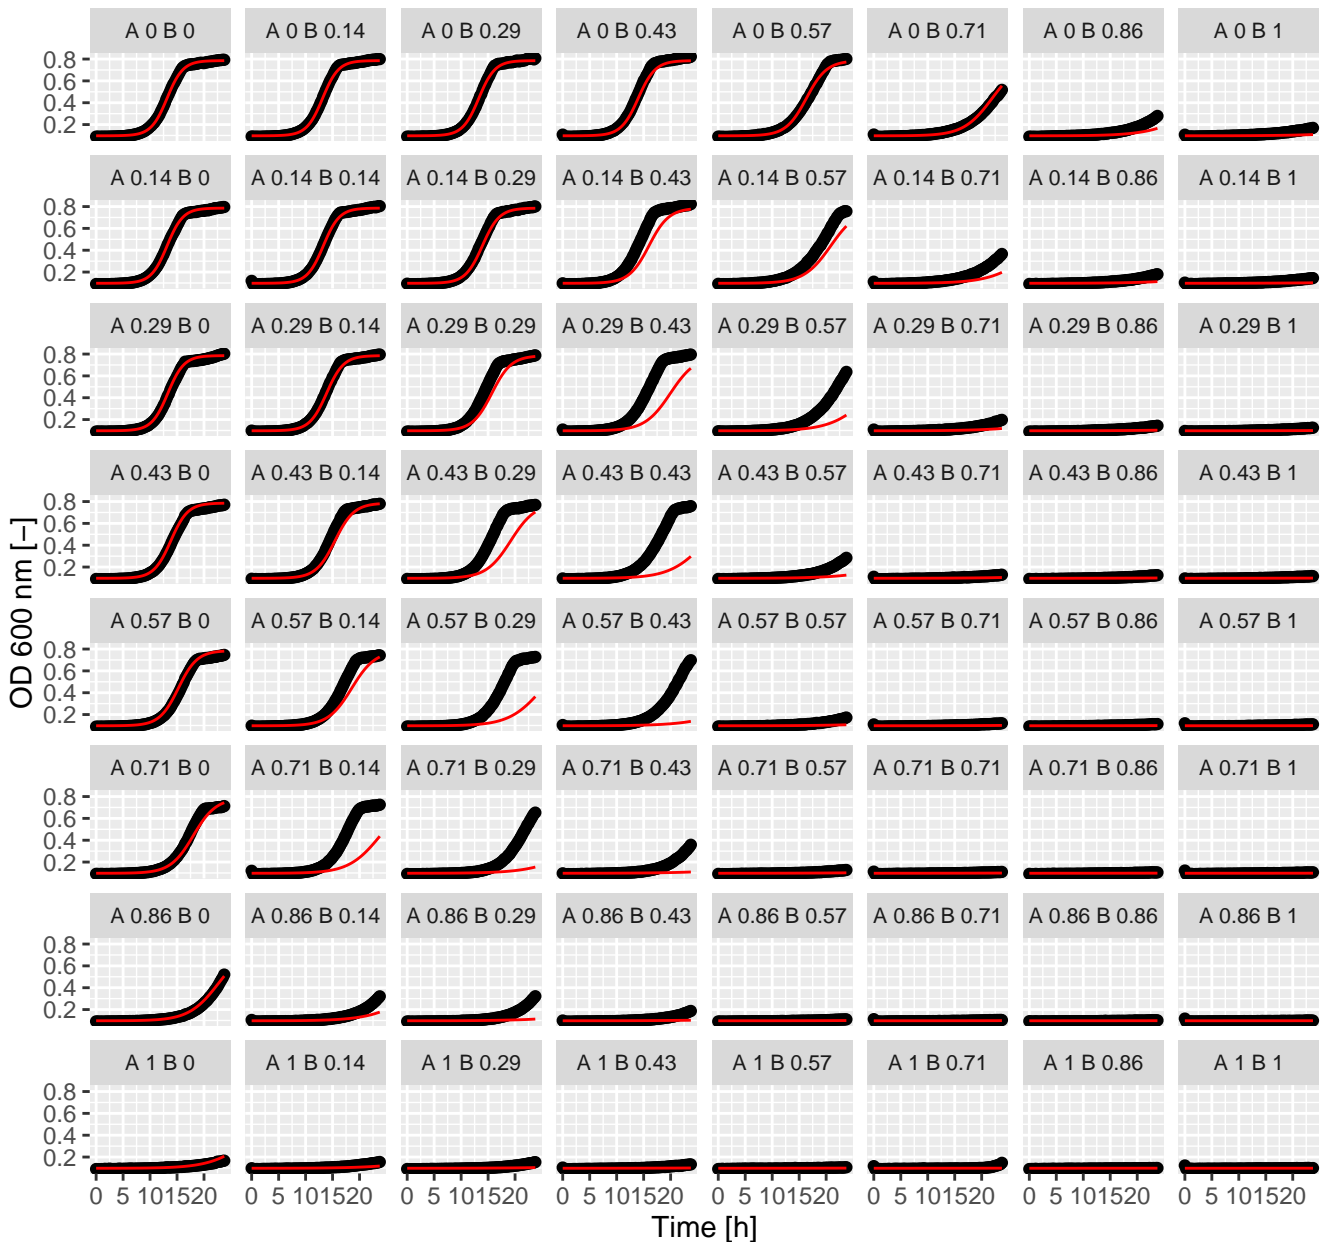

Lat.Rap (= Ax.Bx) full GPDI  
Int\_AB = 1.18 and Int\_BA = 0.03 at EC50

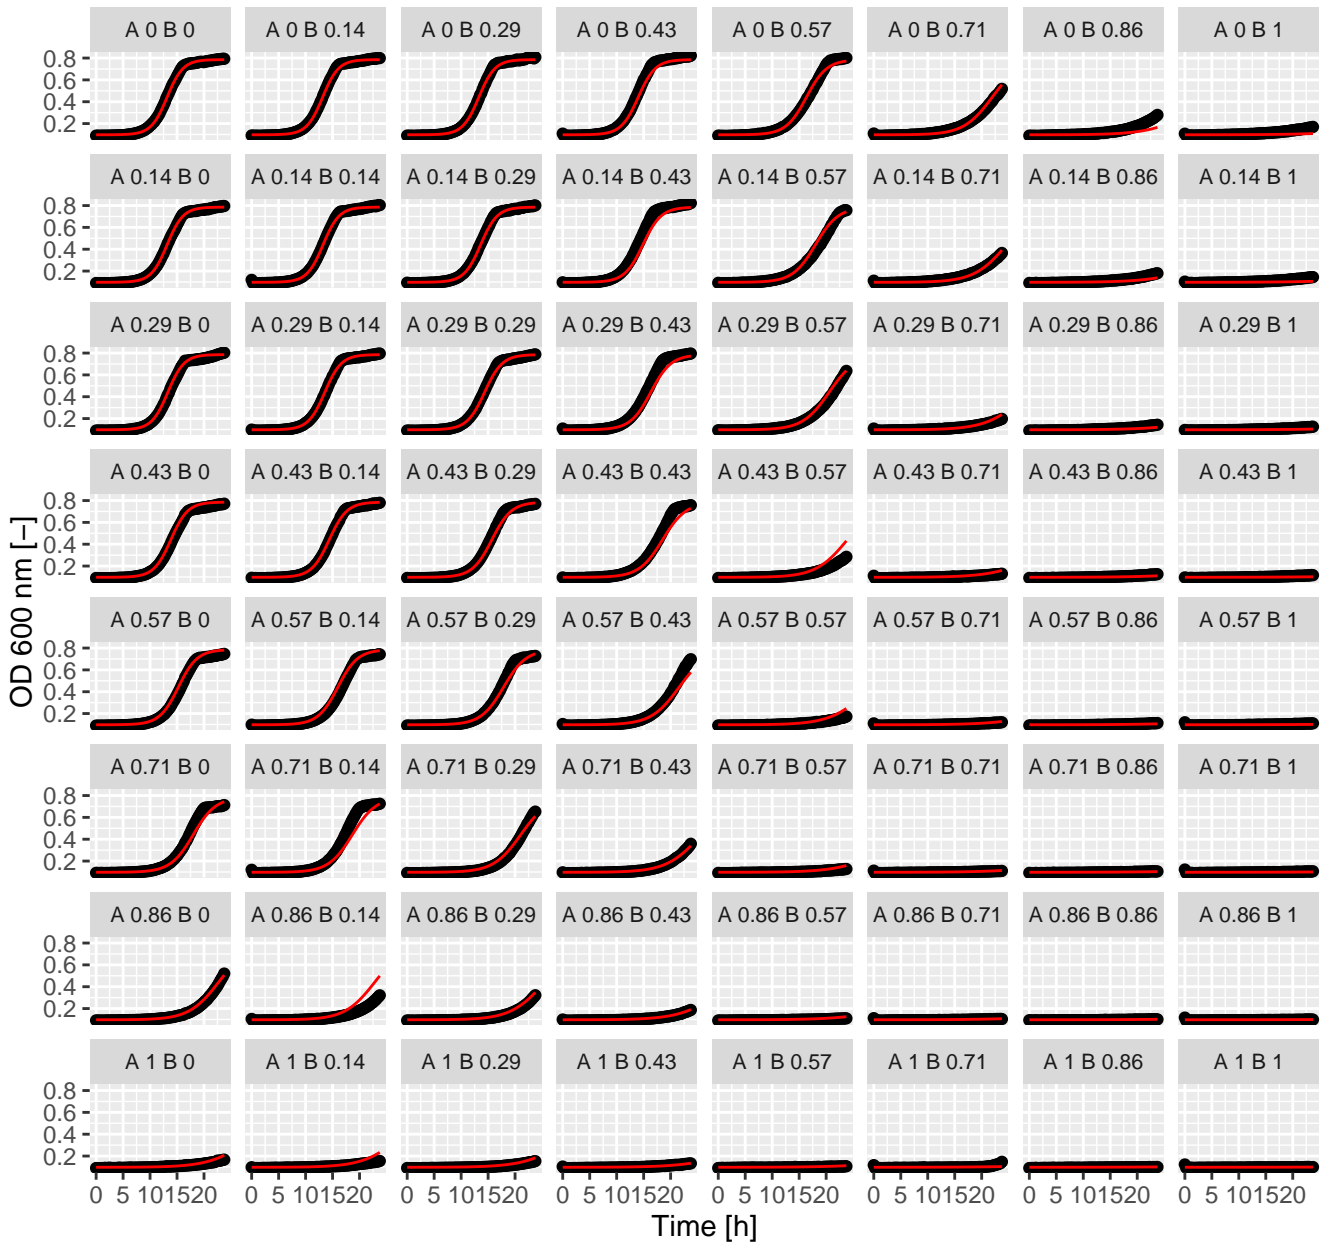

Lat.Sta (= Ax.Bx) exp. additivity (LA)  
Int\_AB = 0 and Int\_BA = 0 at EC50

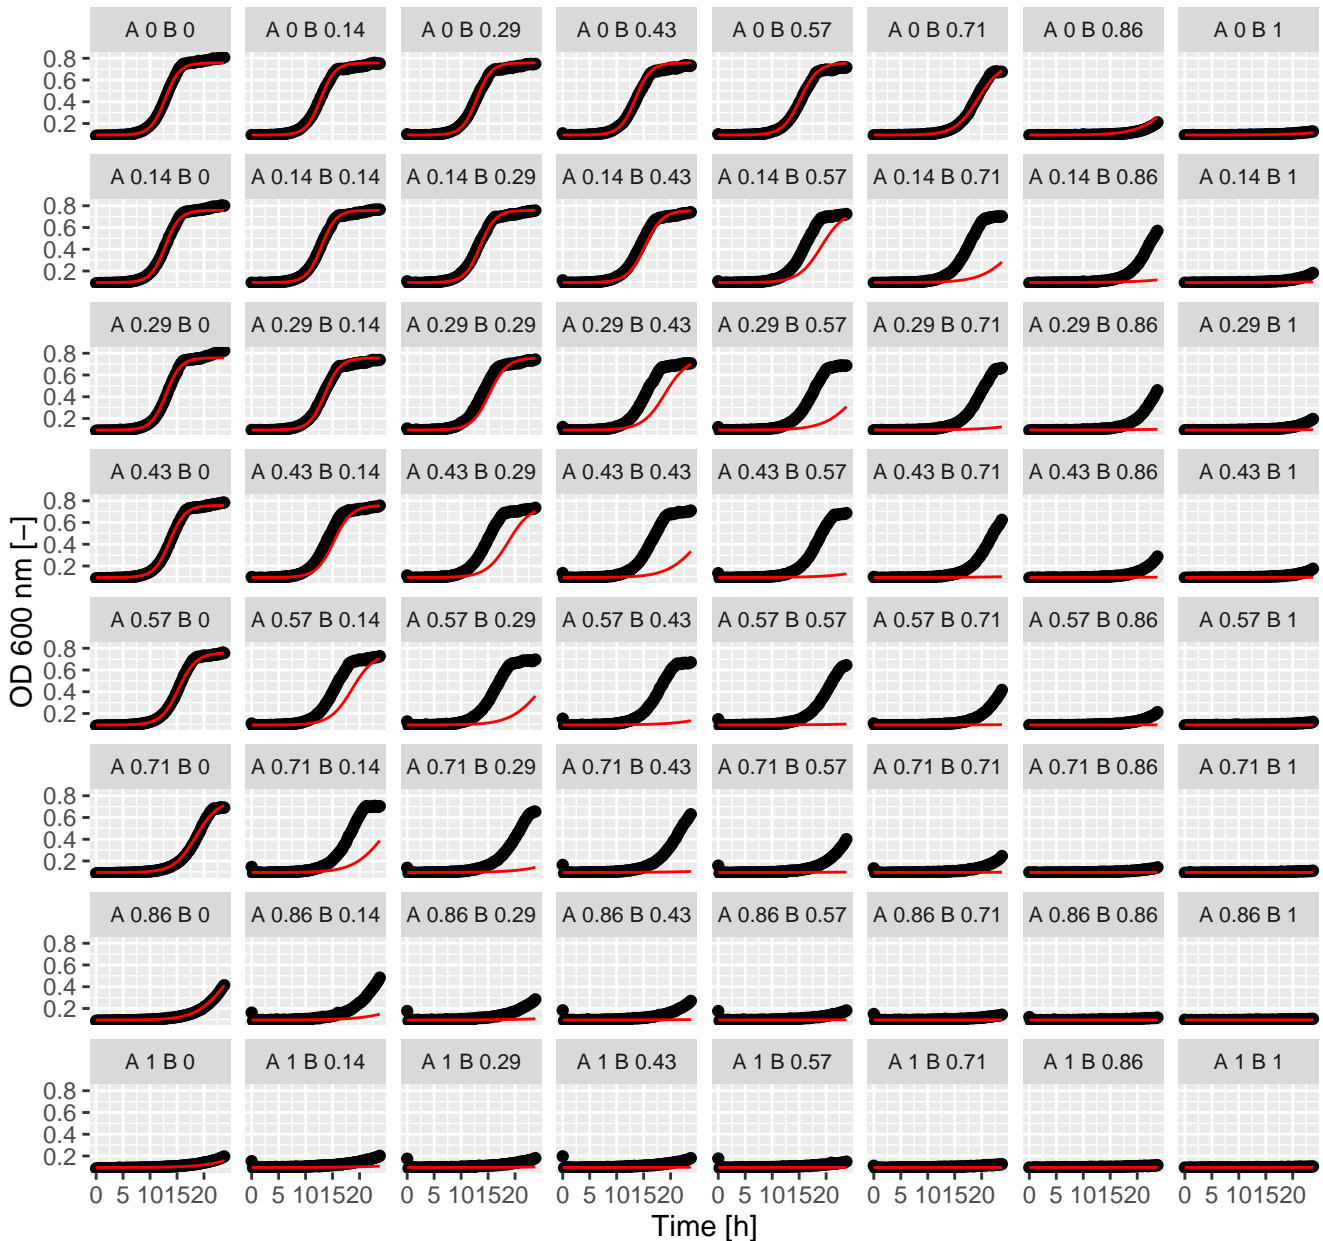

Lat.Sta (= Ax.Bx) full GPDI  
Int\_AB = 0.67 and Int\_BA = 0.56 at EC50

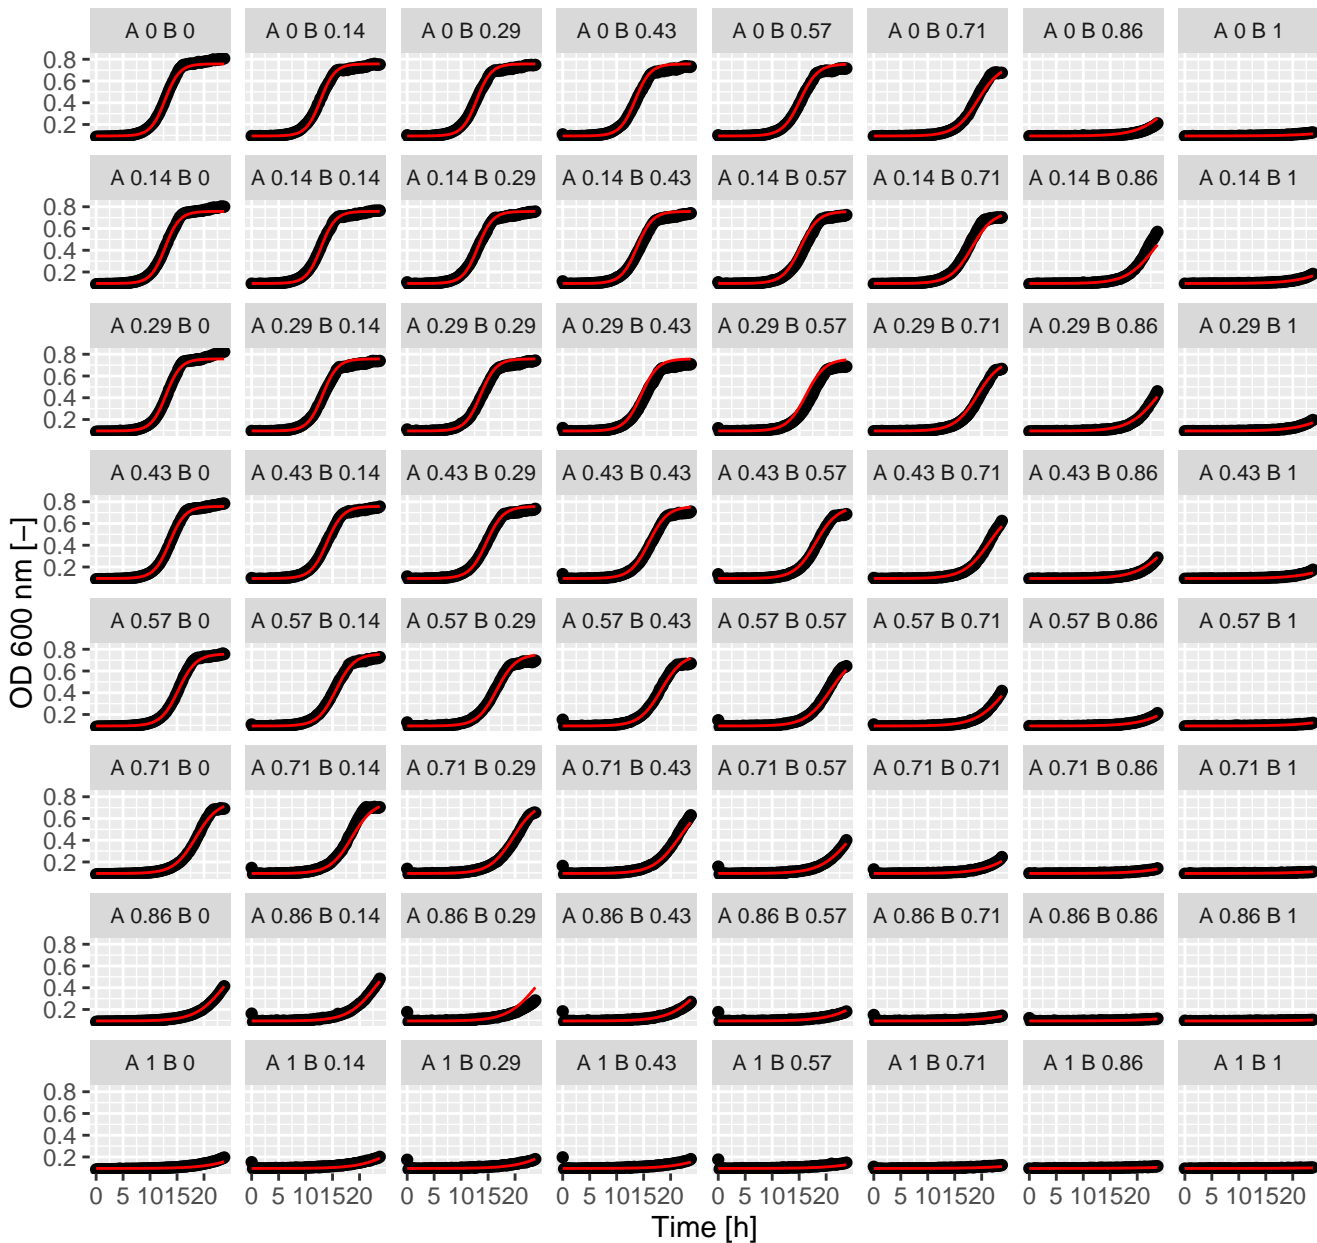



Lat.Tac (= Ax.Bx) exp. additivity (LA)  
 Int\_AB = 0 and Int\_BA = 0 at EC50

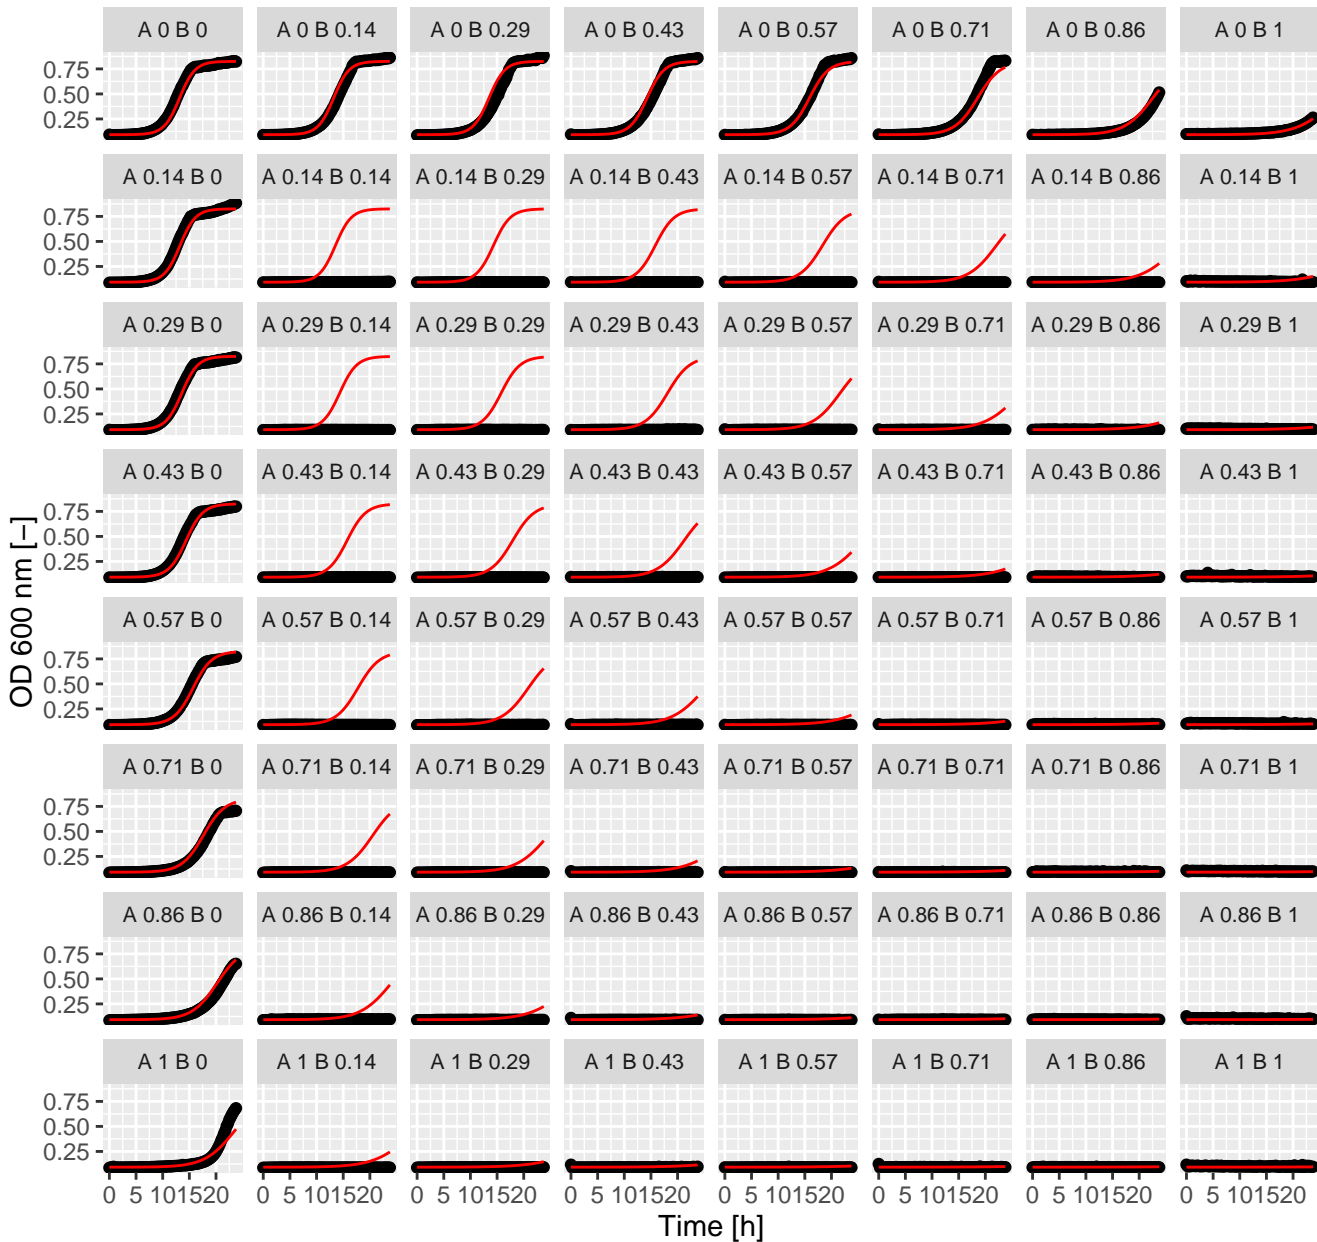

Lat.Tac (= Ax.Bx) full GPDI  
 Int\_AB = -0.97 and Int\_BA = -0.75 at EC50

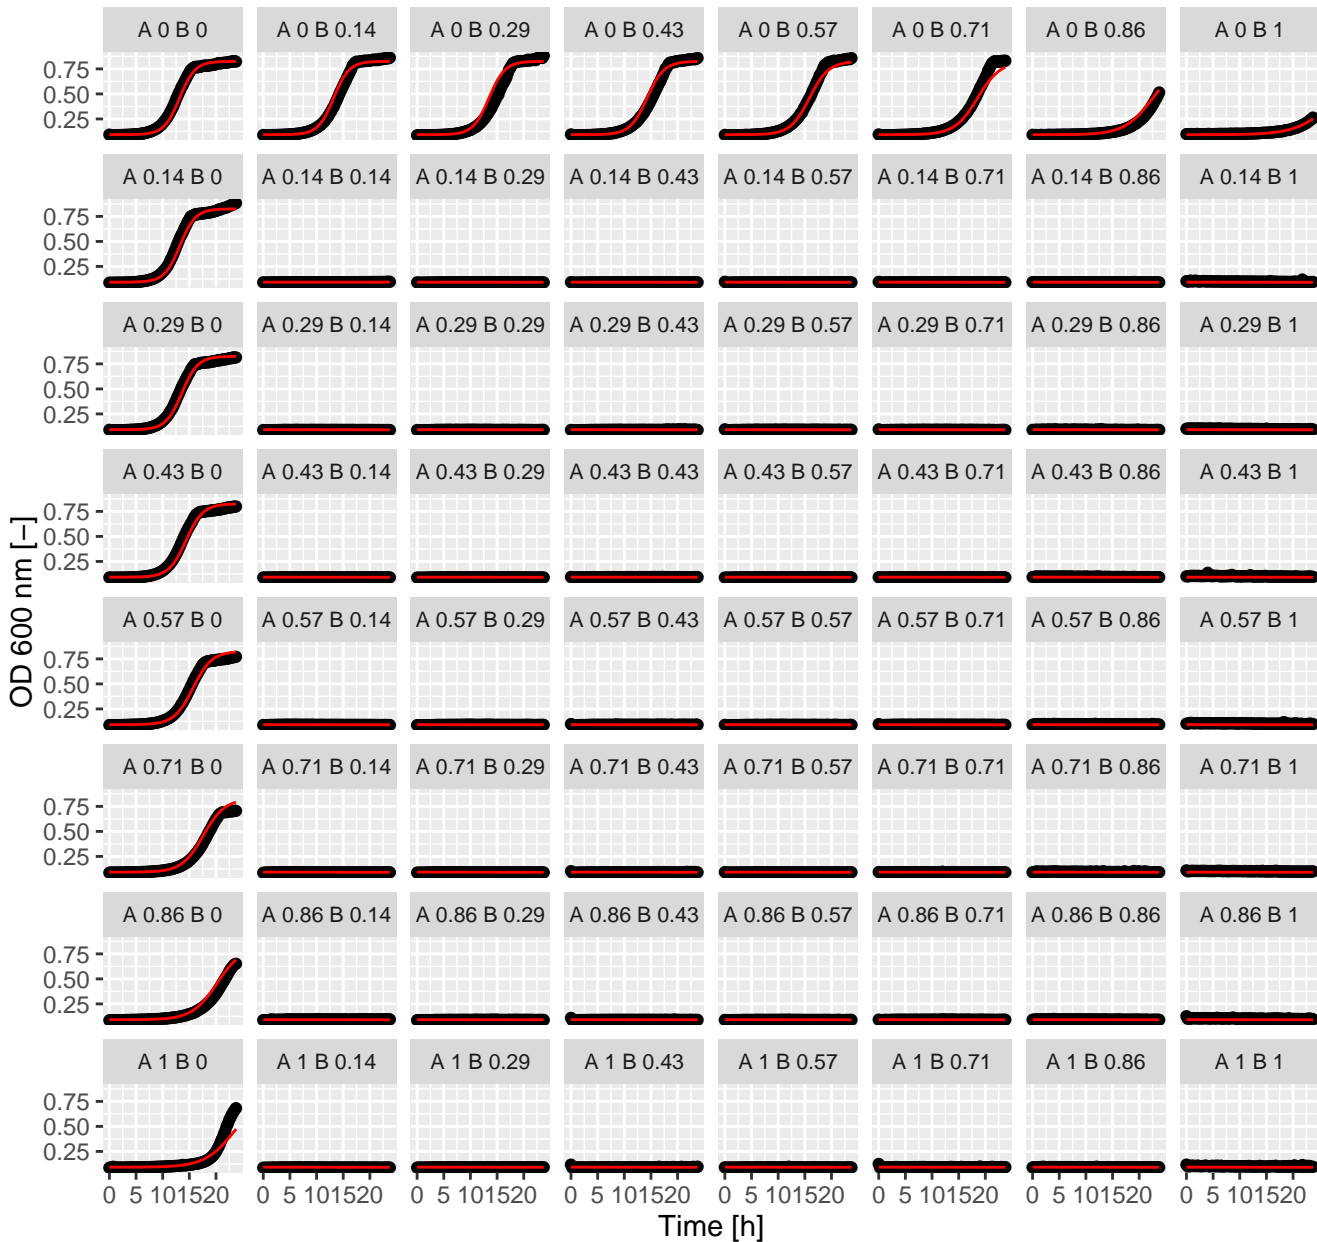

Lat.Tam (= Ax.Bx) exp. additivity (LA)  
 Int\_AB = 0 and Int\_BA = 0 at EC50

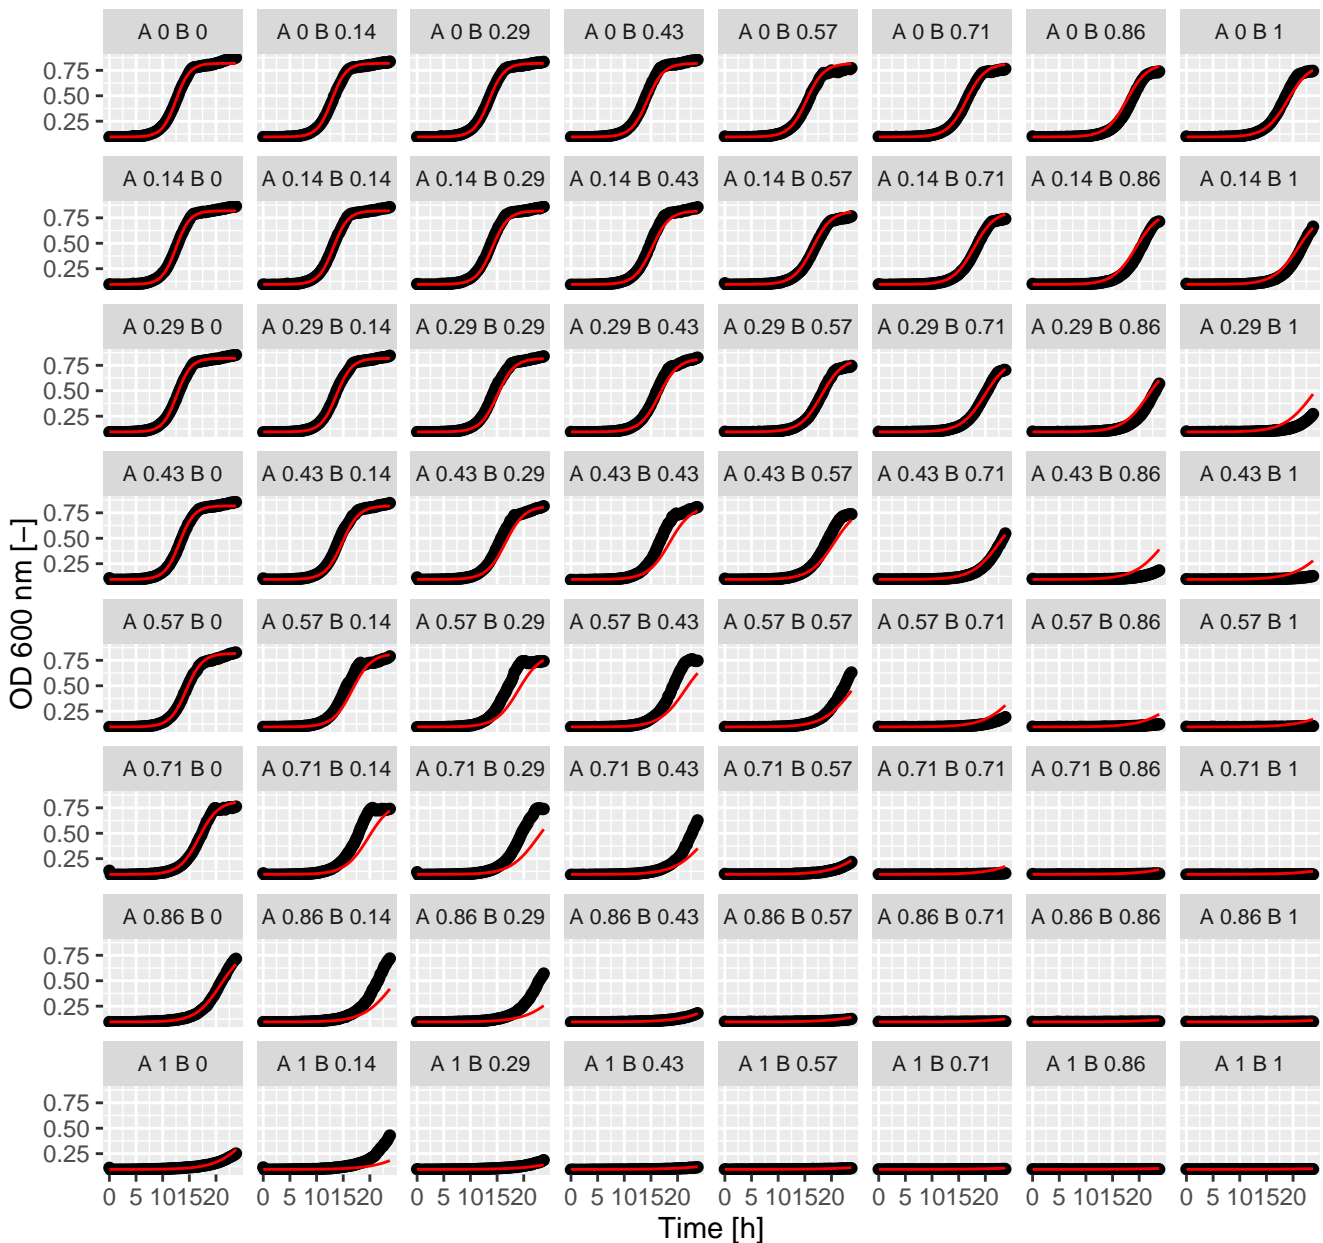

Lat.Tam (= Ax.Bx) full GPD1  
Int\_AB = 0.62 and Int\_BA = -0.41 at EC50

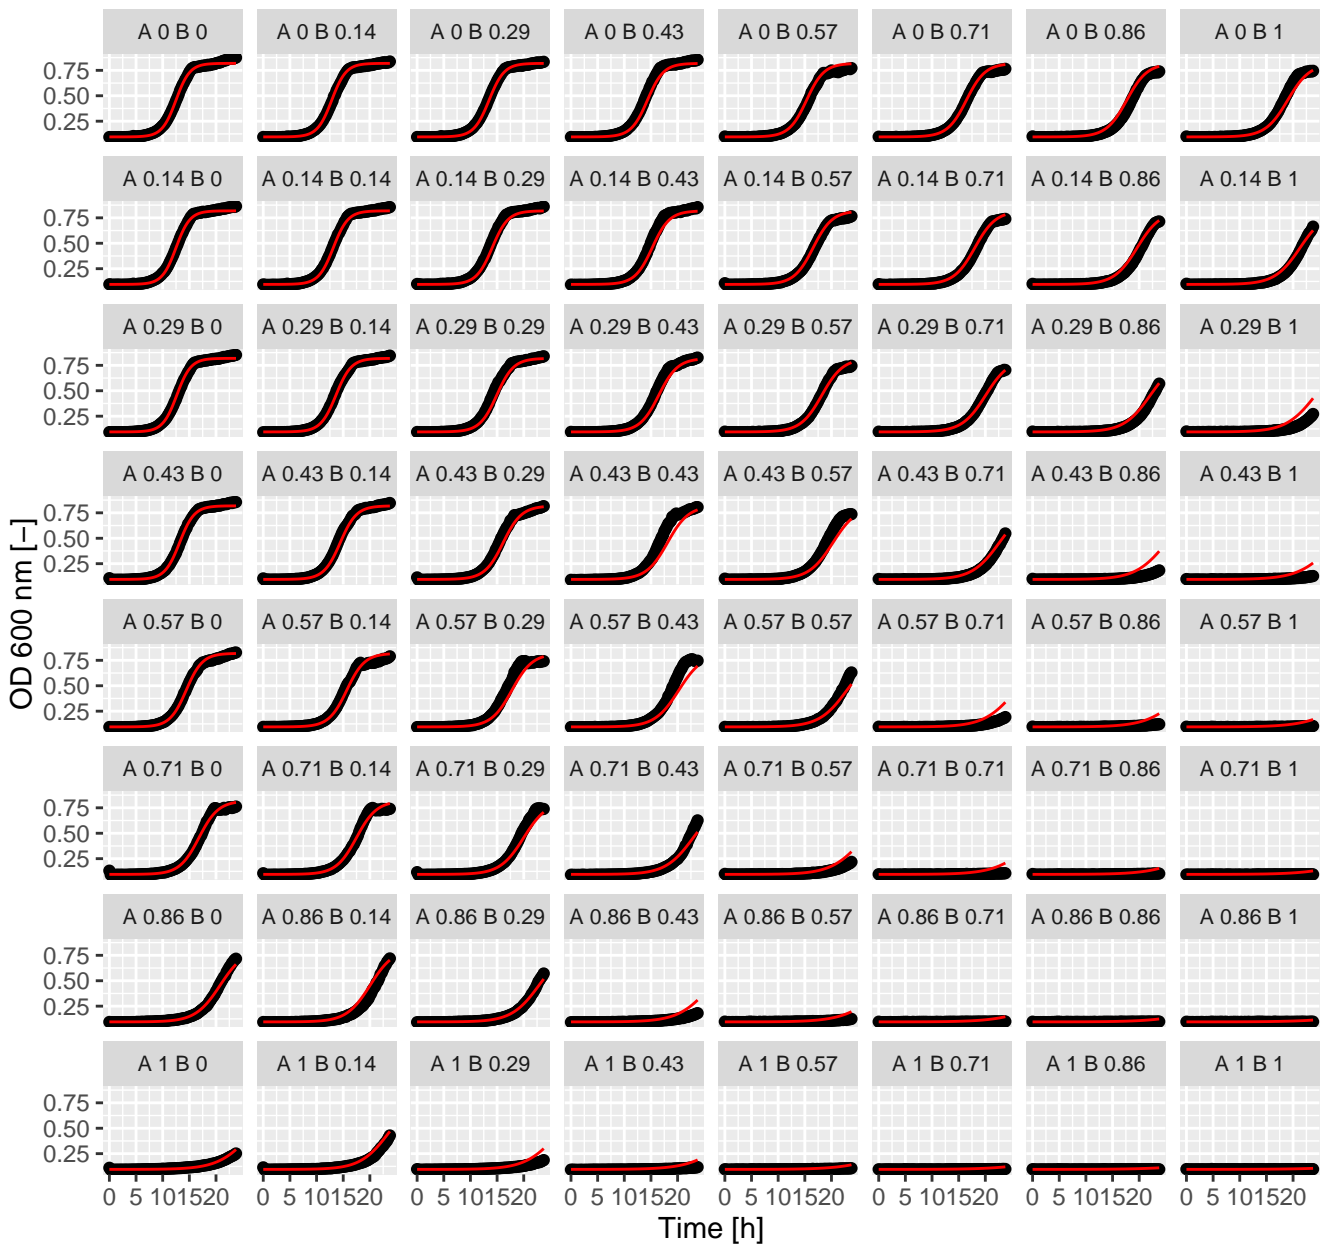

Lat.Ter (= Ax.Bx) exp. additivity (LA)  
Int\_AB = 0 and Int\_BA = 0 at EC50

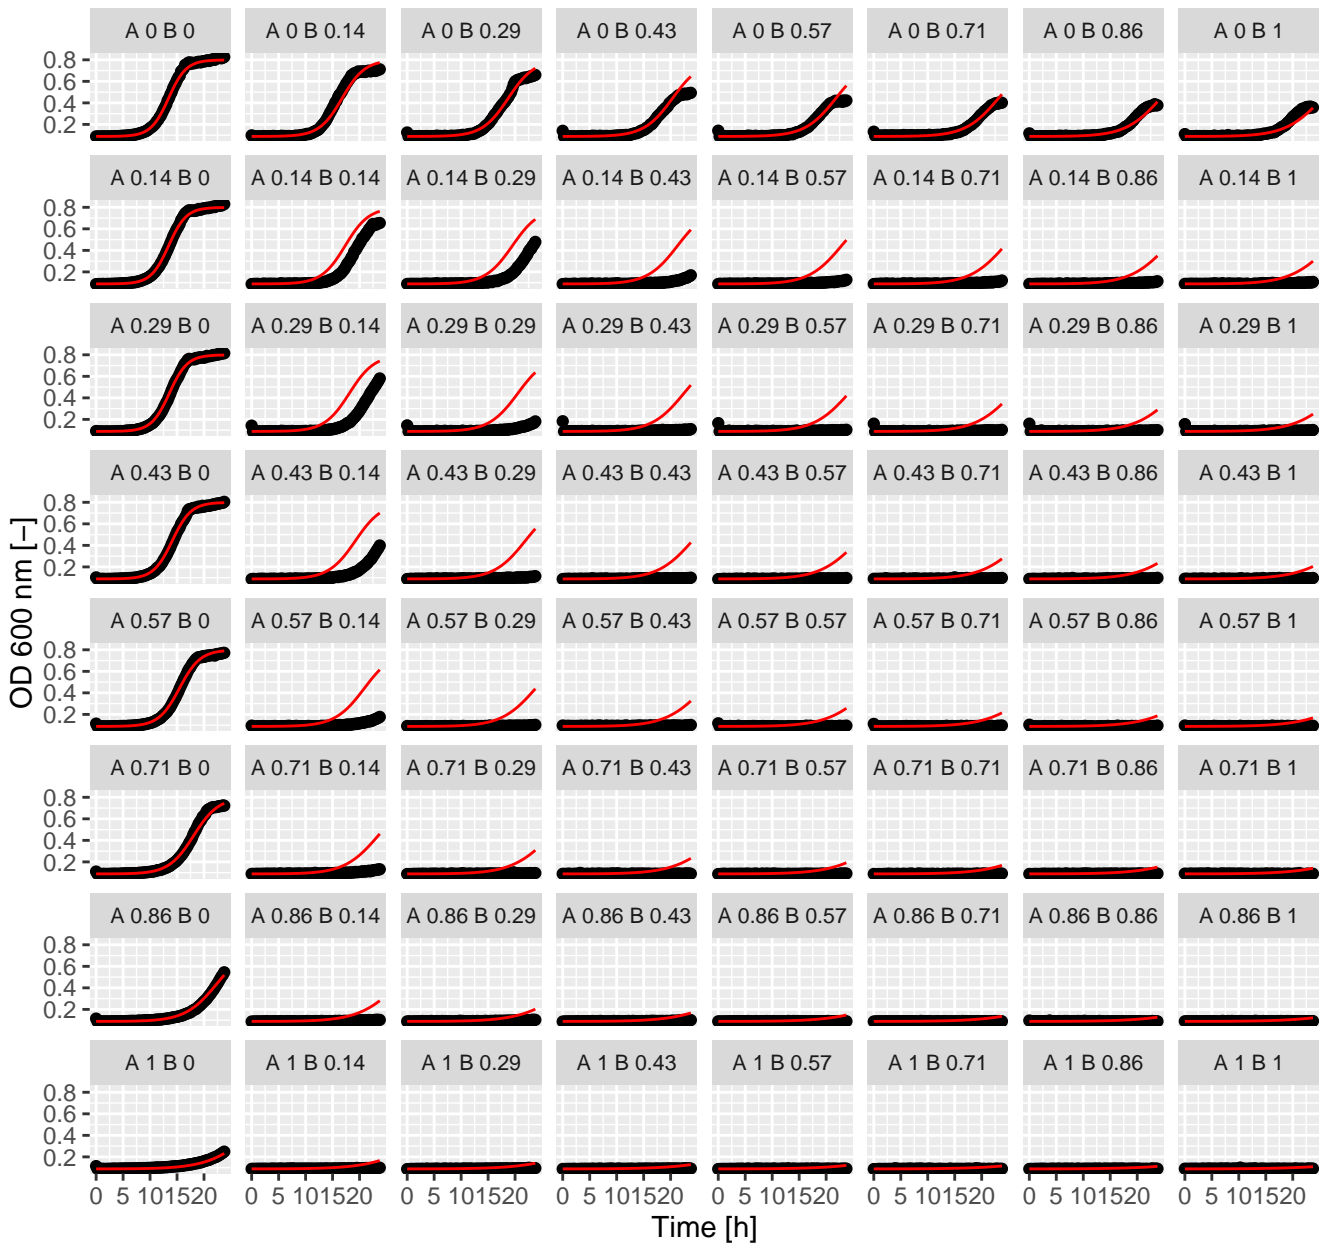

Lat.Ter (= Ax.Bx) full GPDI  
 Int\_AB = -0.79 and Int\_BA = -0.54 at EC50

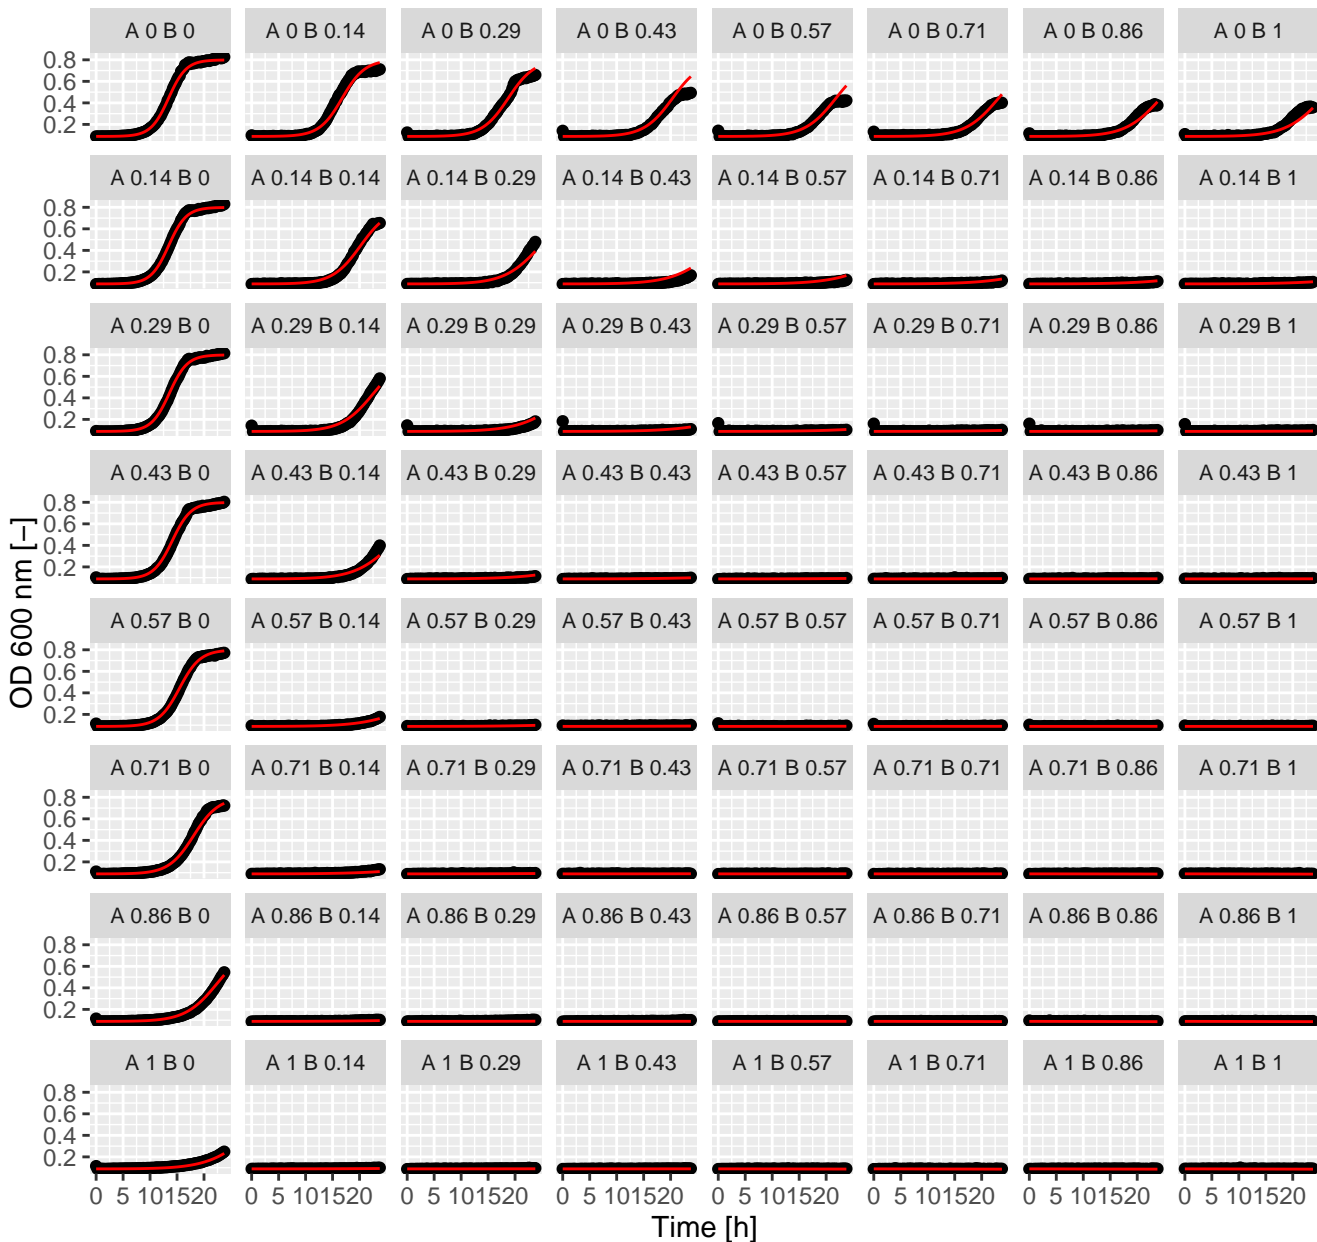

Lat.Tun (= Ax.Bx) exp. additivity (LA)  
Int\_AB = 0 and Int\_BA = 0 at EC50

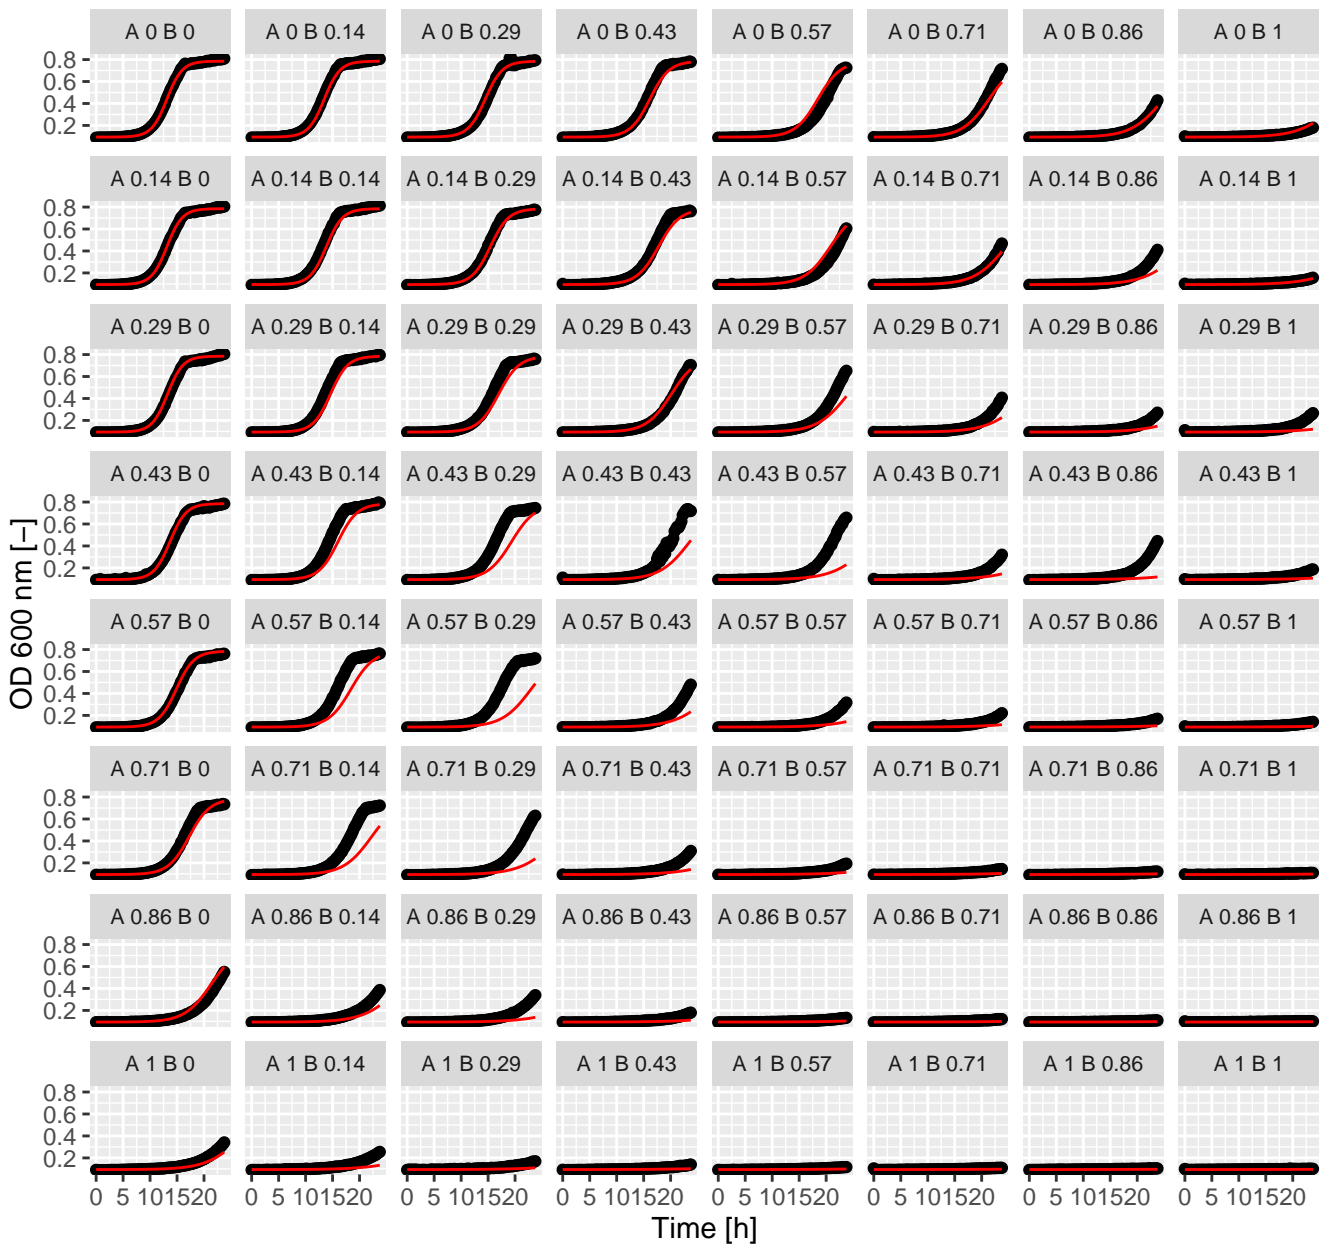

Lat.Tun (= Ax.Bx) full GPDI  
Int\_AB = 0.36 and Int\_BA = 0.22 at EC50

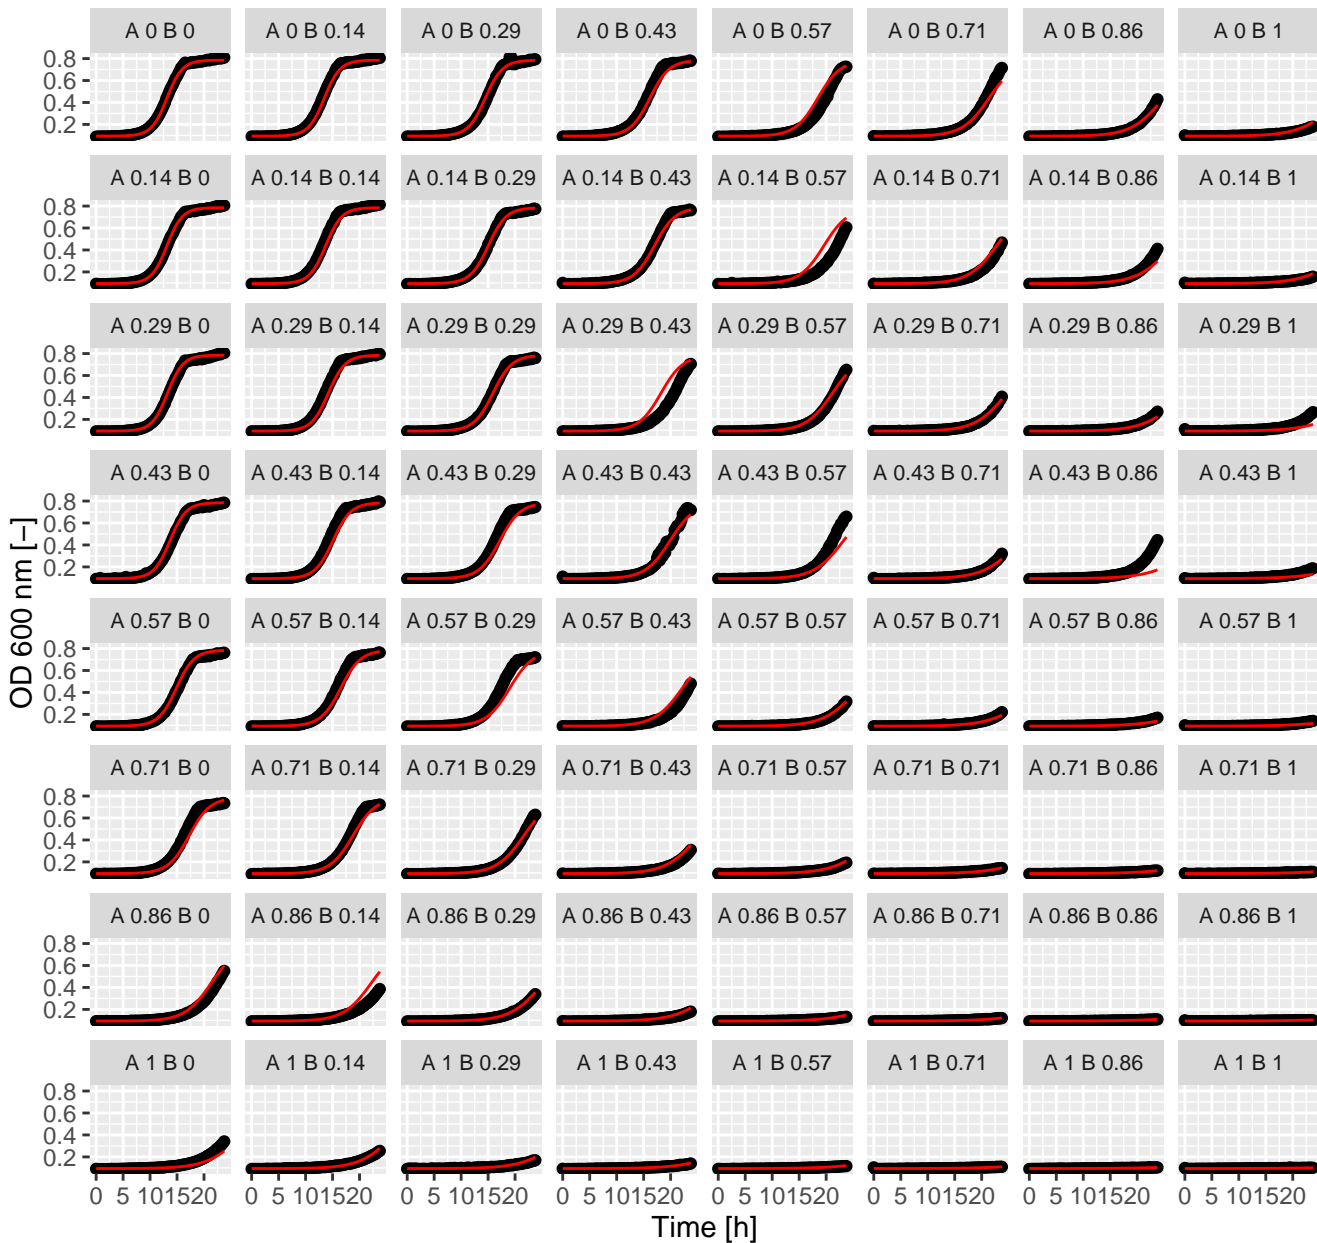



Lit.Rad (= Ax.Bx) exp. additivity (LA)  
Int\_AB = 0 and Int\_BA = 0 at EC50

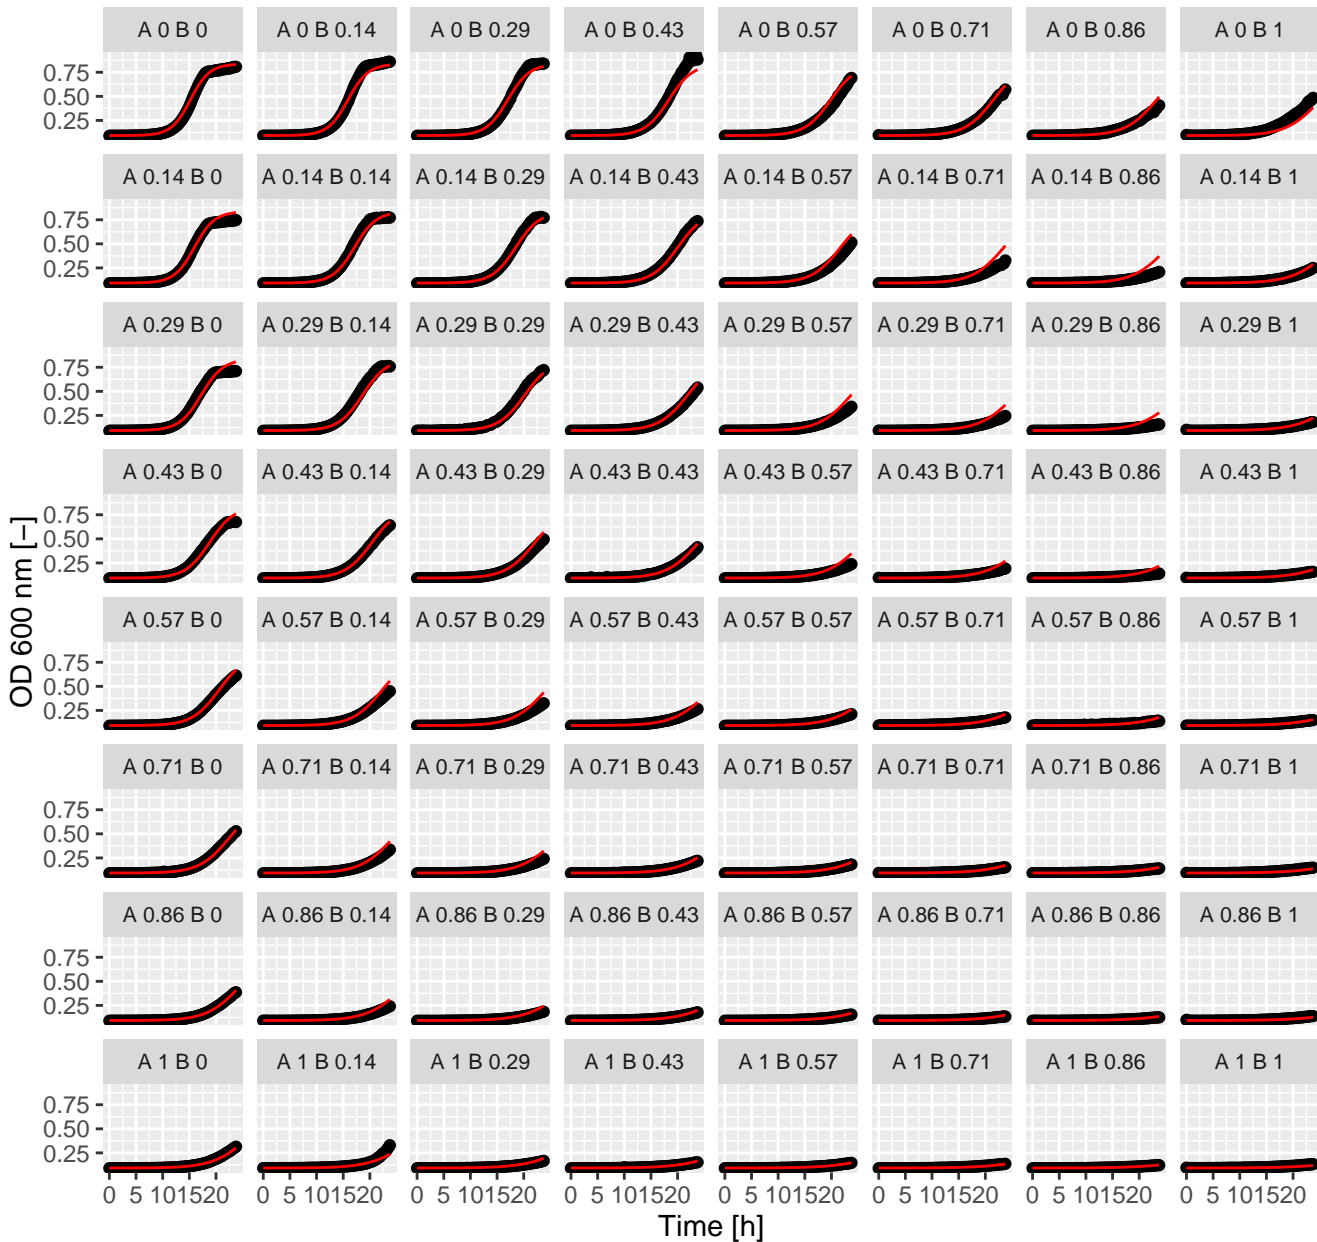

Lit.Rad (= Ax.Bx) full GPDI  
Int\_AB = -0.26 and Int\_BA = -0.05 at EC50

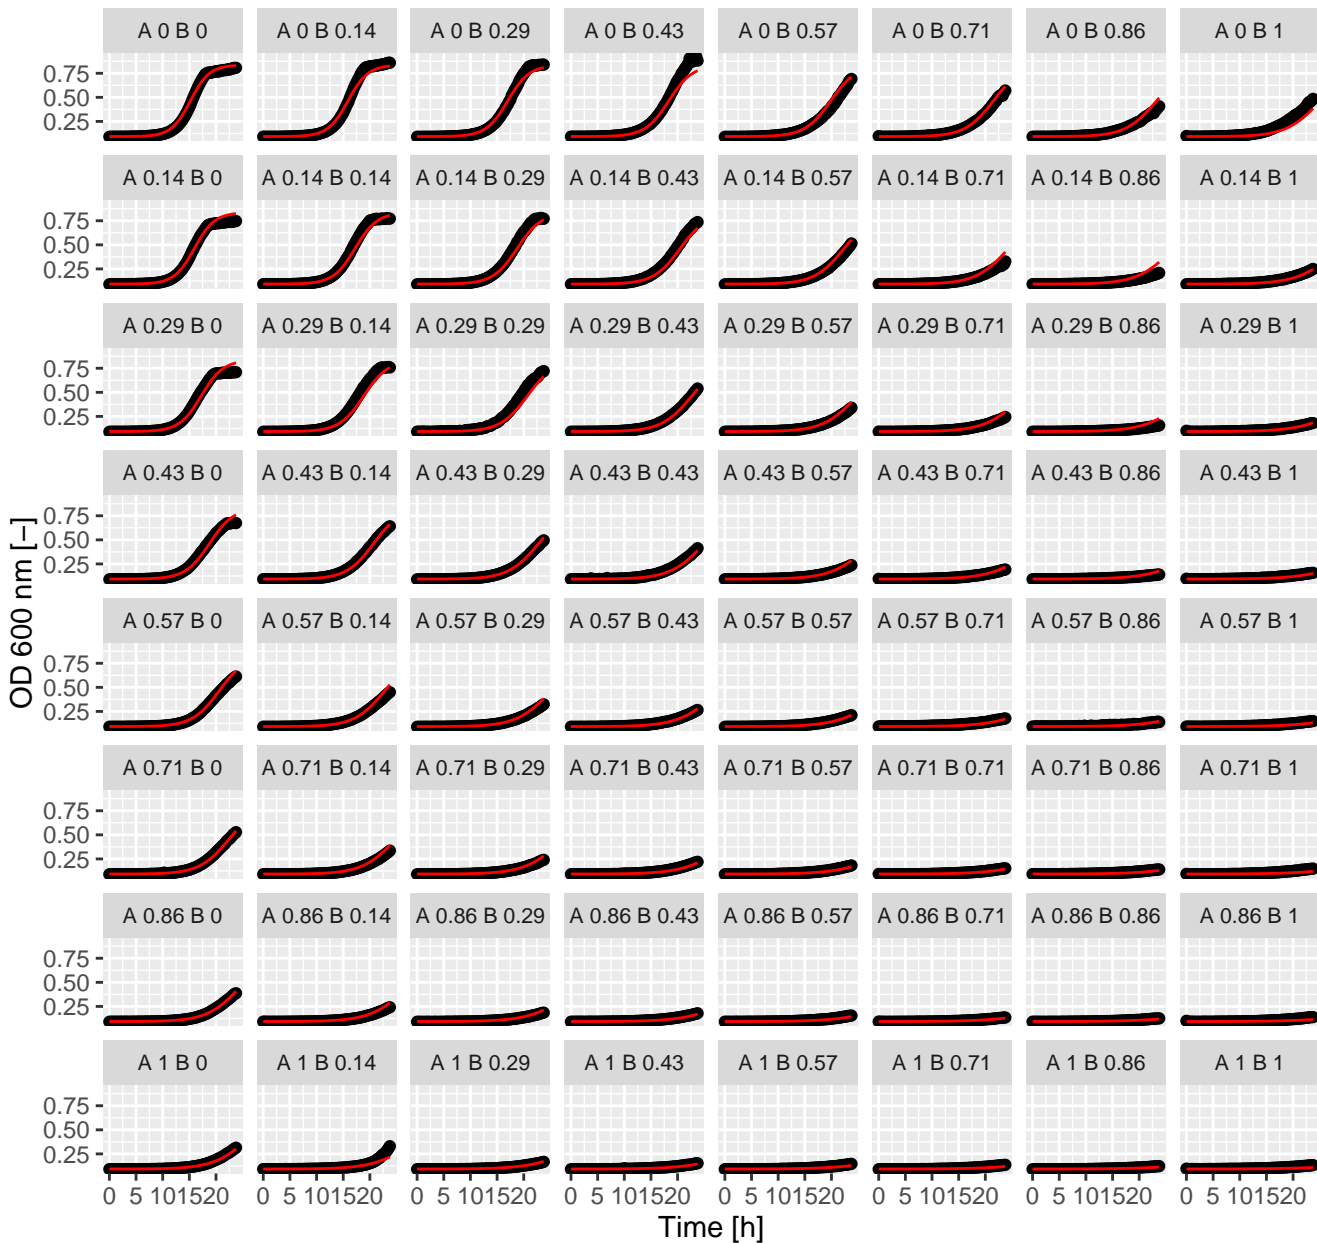

Lit.Rap (= Ax.Bx) exp. additivity (LA)  
Int\_AB = 0 and Int\_BA = 0 at EC50

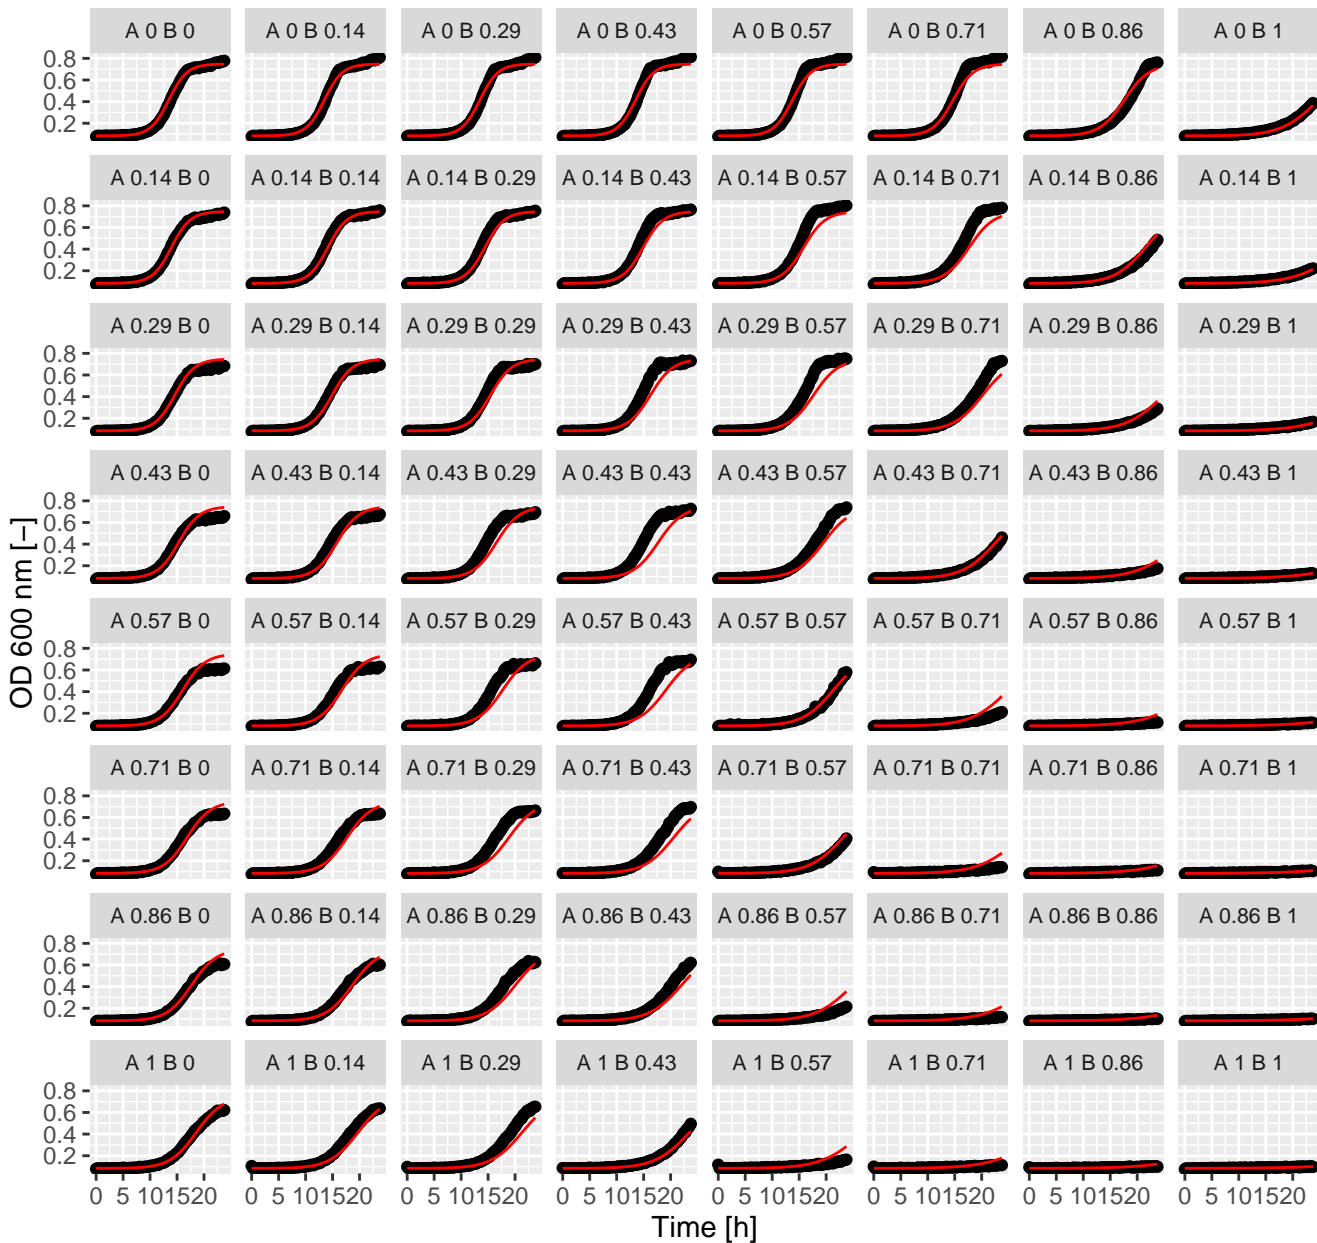

Lit.Rap (= Ax.Bx) full GPDI  
Int\_AB = 3.46 and Int\_BA = -0.56 at EC50

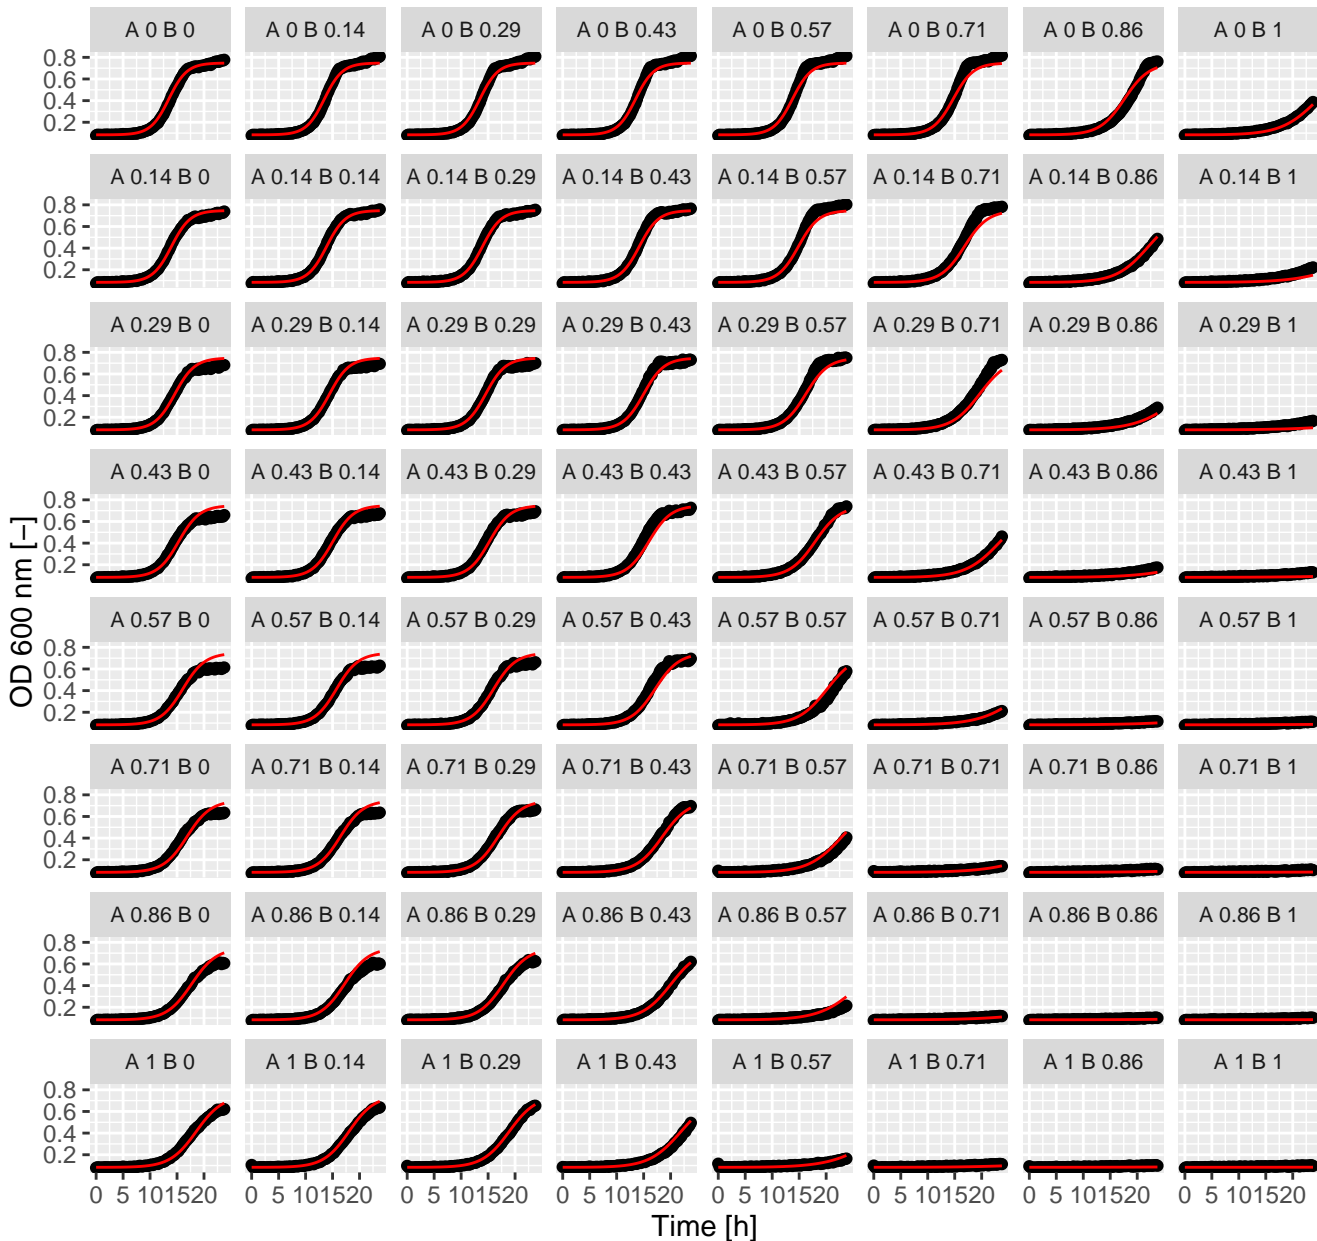

Lit.Sta (= Ax.Bx) exp. additivity (LA)  
Int\_AB = 0 and Int\_BA = 0 at EC50

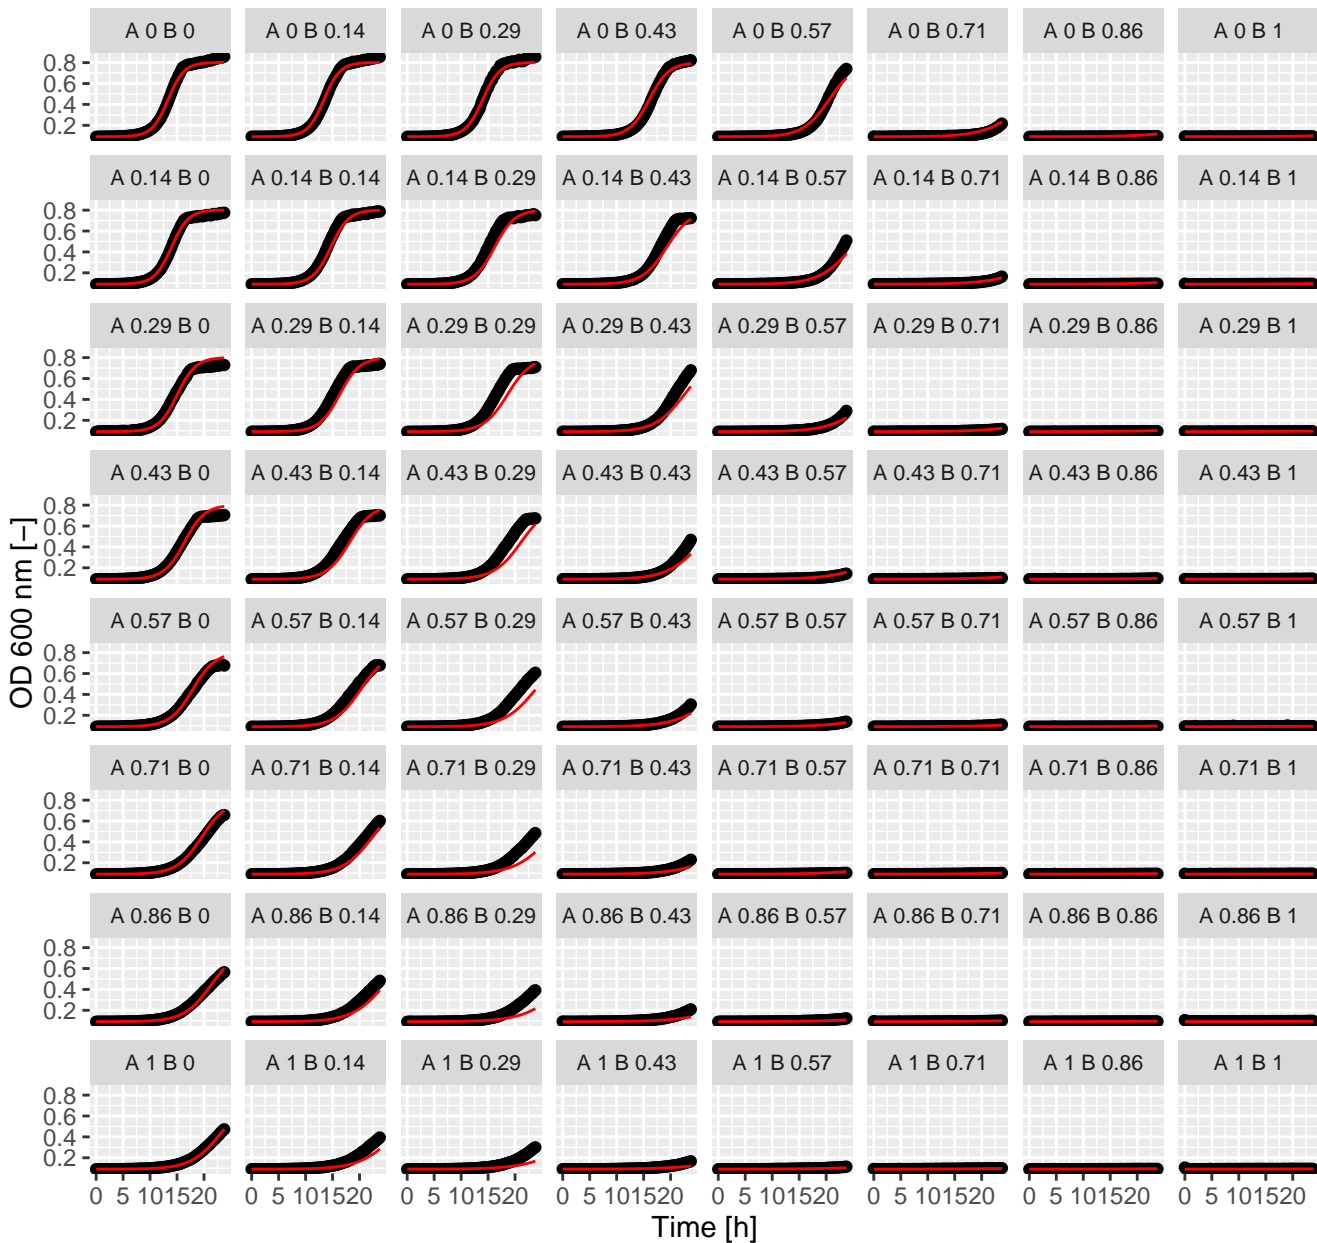

Lit.Sta (= Ax.Bx) full GPDI  
Int\_AB = 1.47 and Int\_BA = -0.24 at EC50

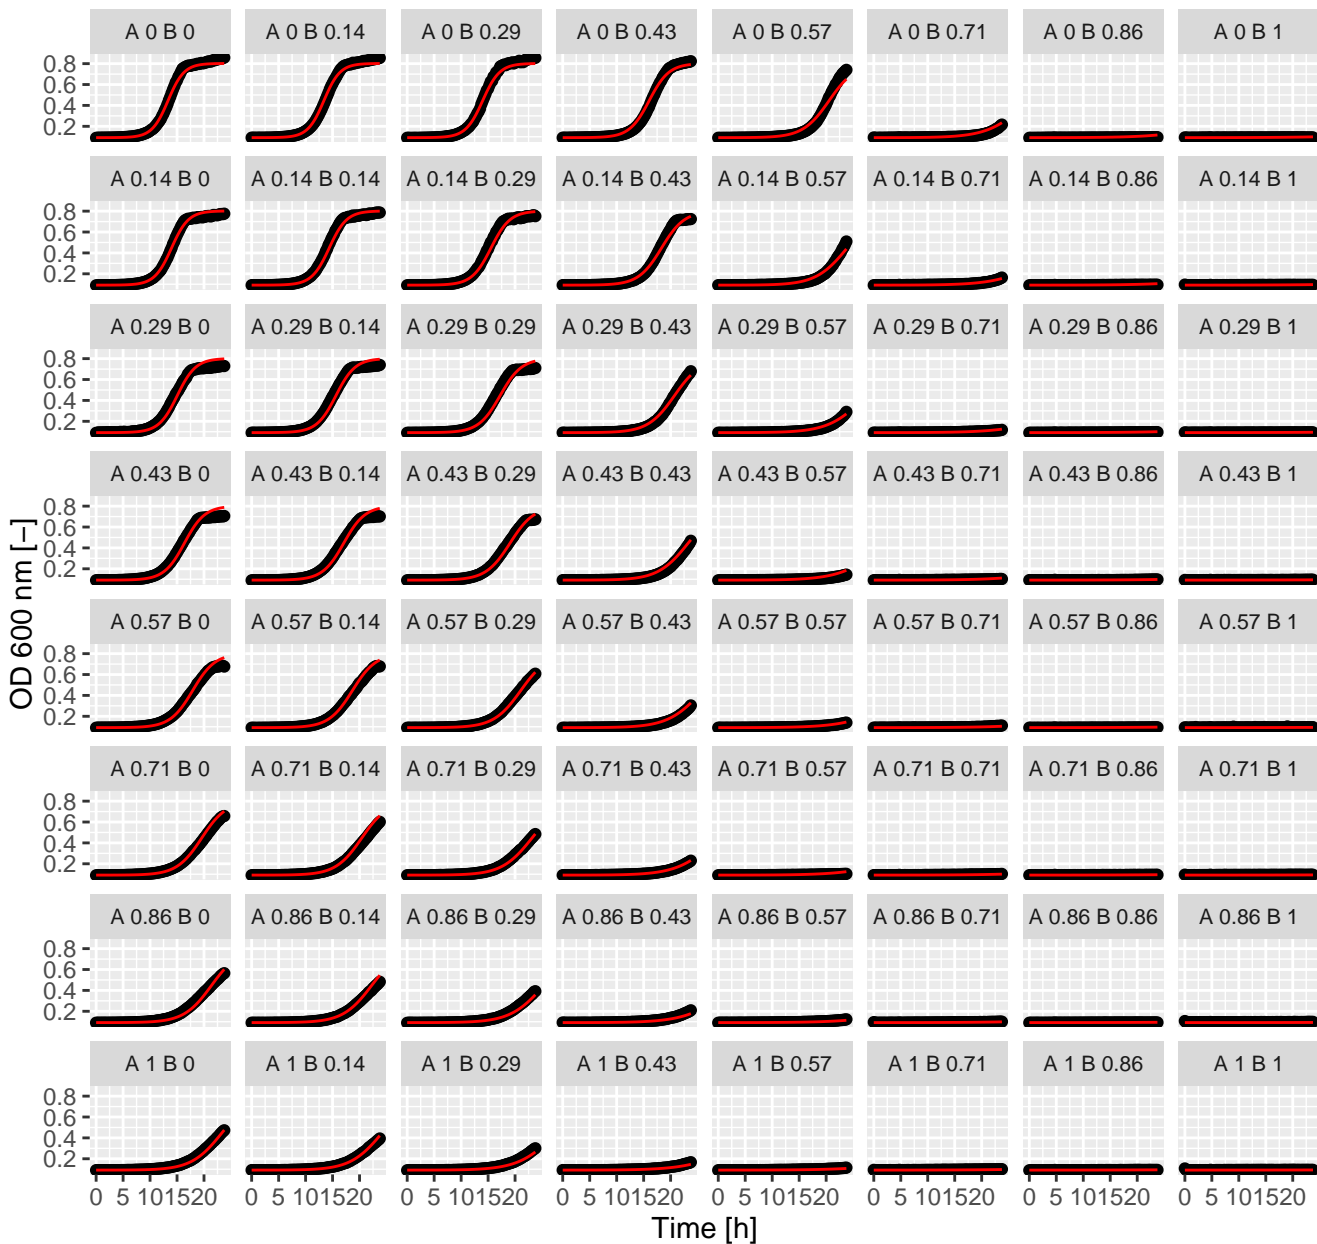

Lit. Tac (= Ax.Bx) exp. additivity (LA)  
Int\_AB = 0 and Int\_BA = 0 at EC50

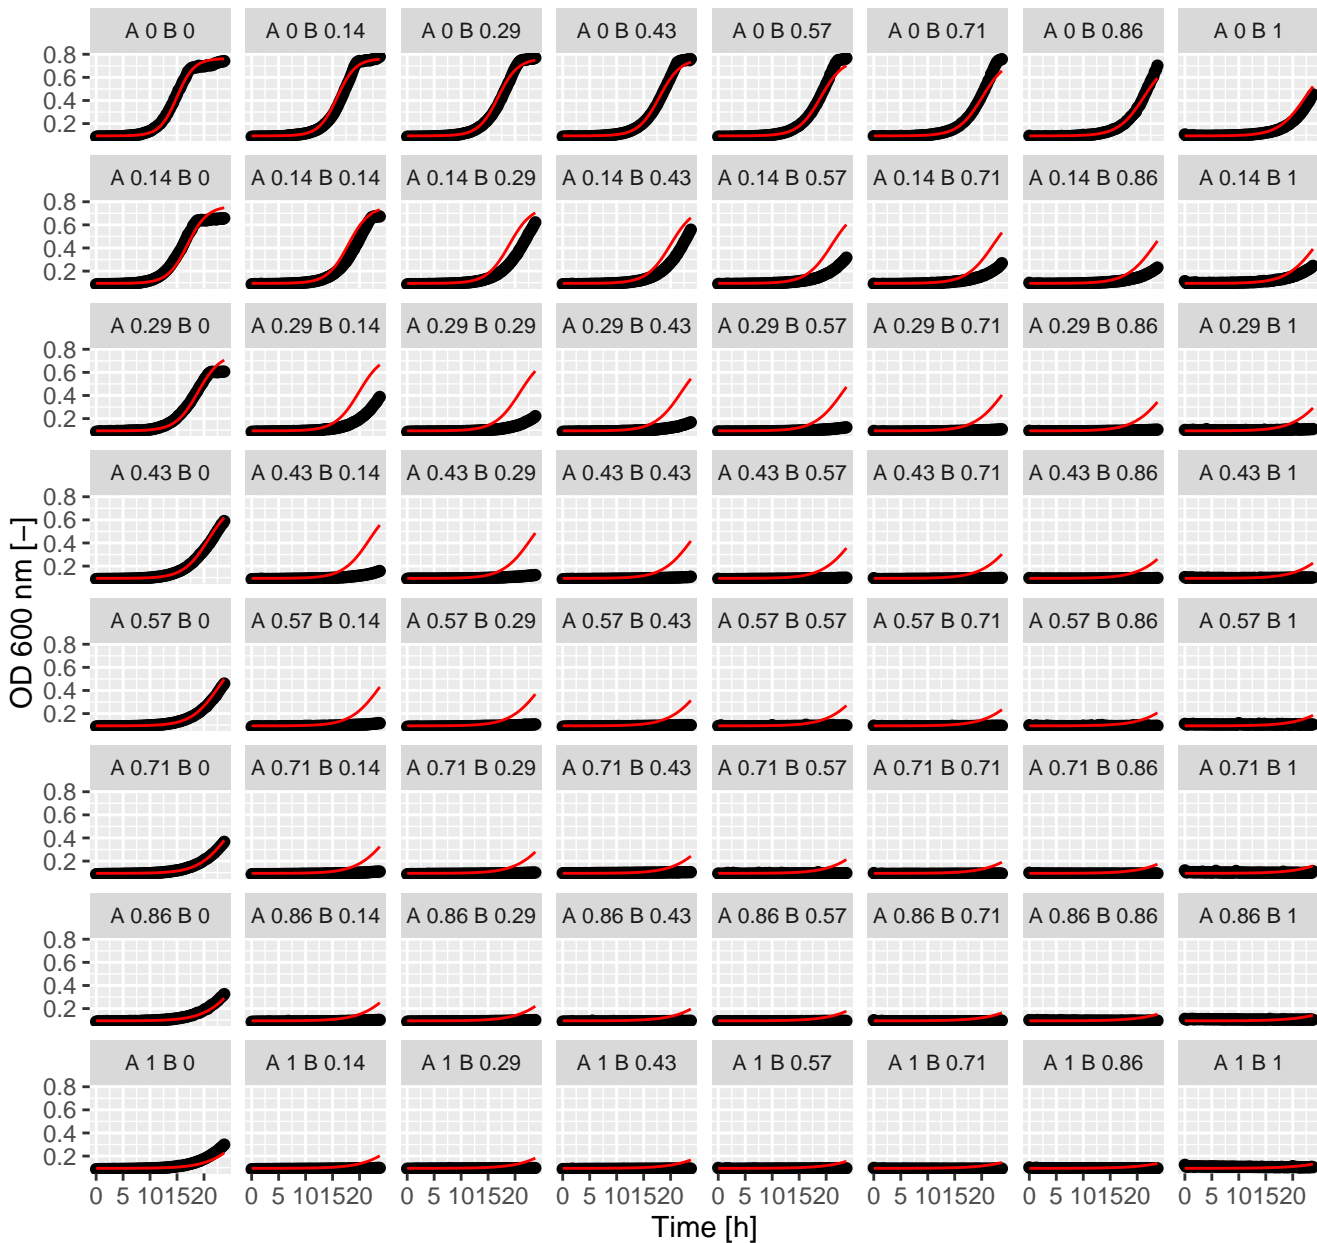

Lit.Tac (= Ax.Bx) full GPDI  
Int\_AB = -0.89 and Int\_BA = 20716.94 at EC50

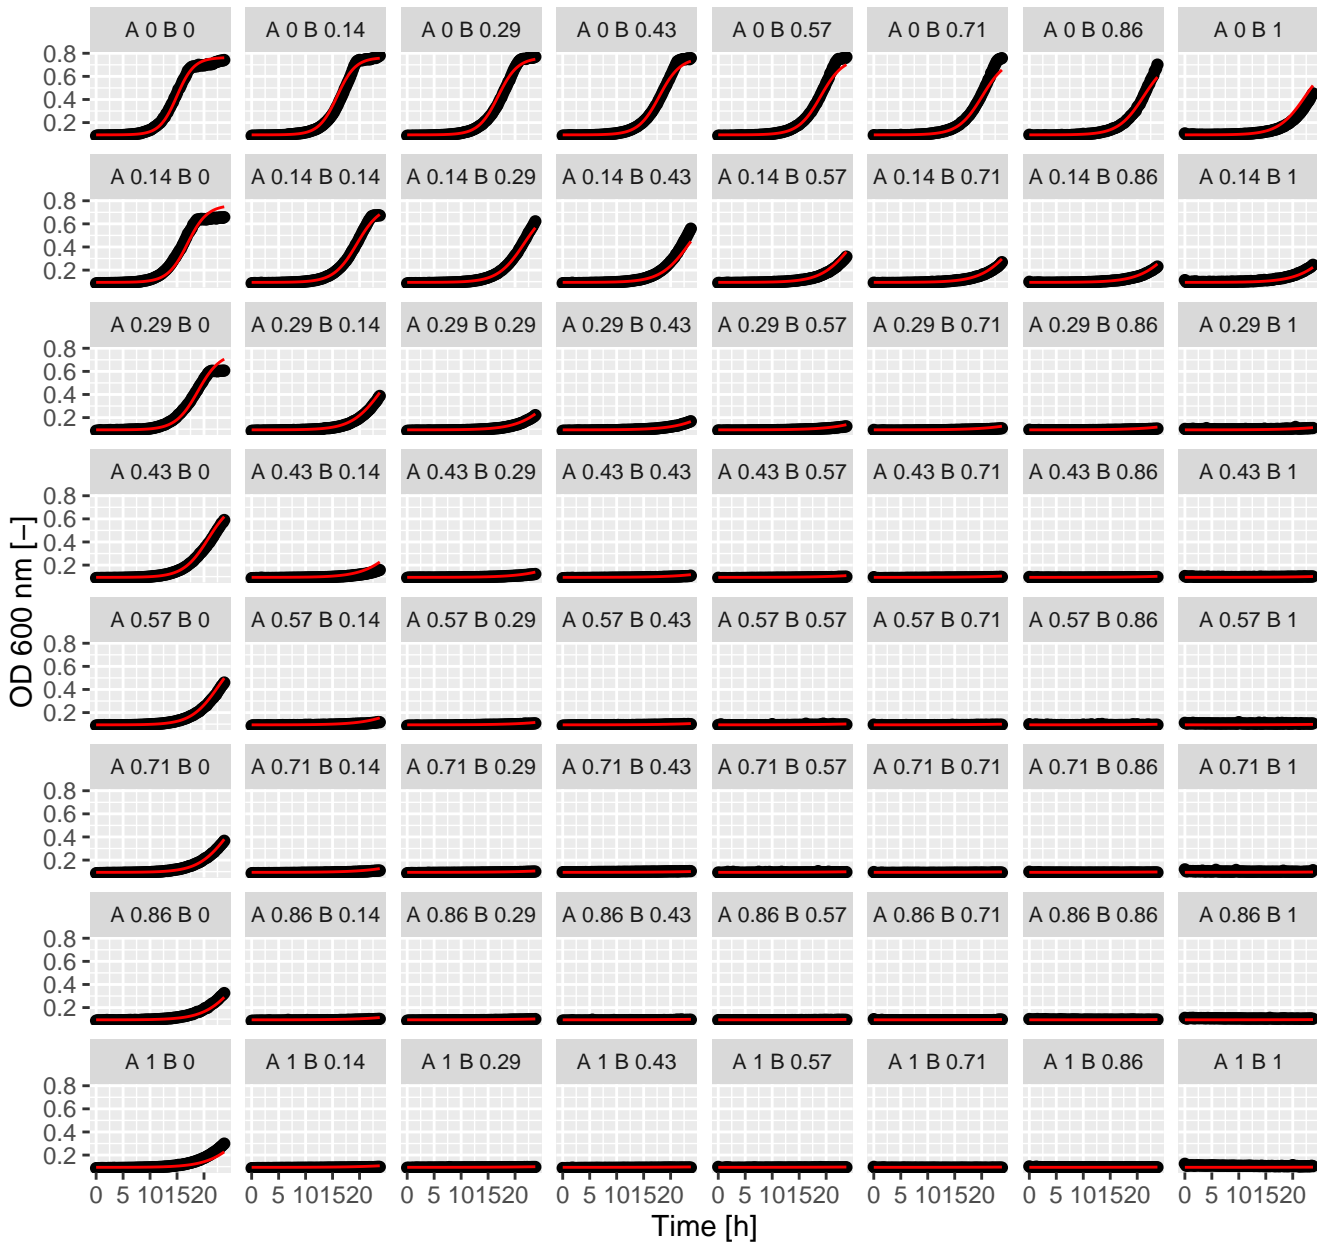



Met.Met (= Ax.Bx) exp. additivity (LA)  
 Int\_AB = 0 and Int\_BA = 0 at EC50

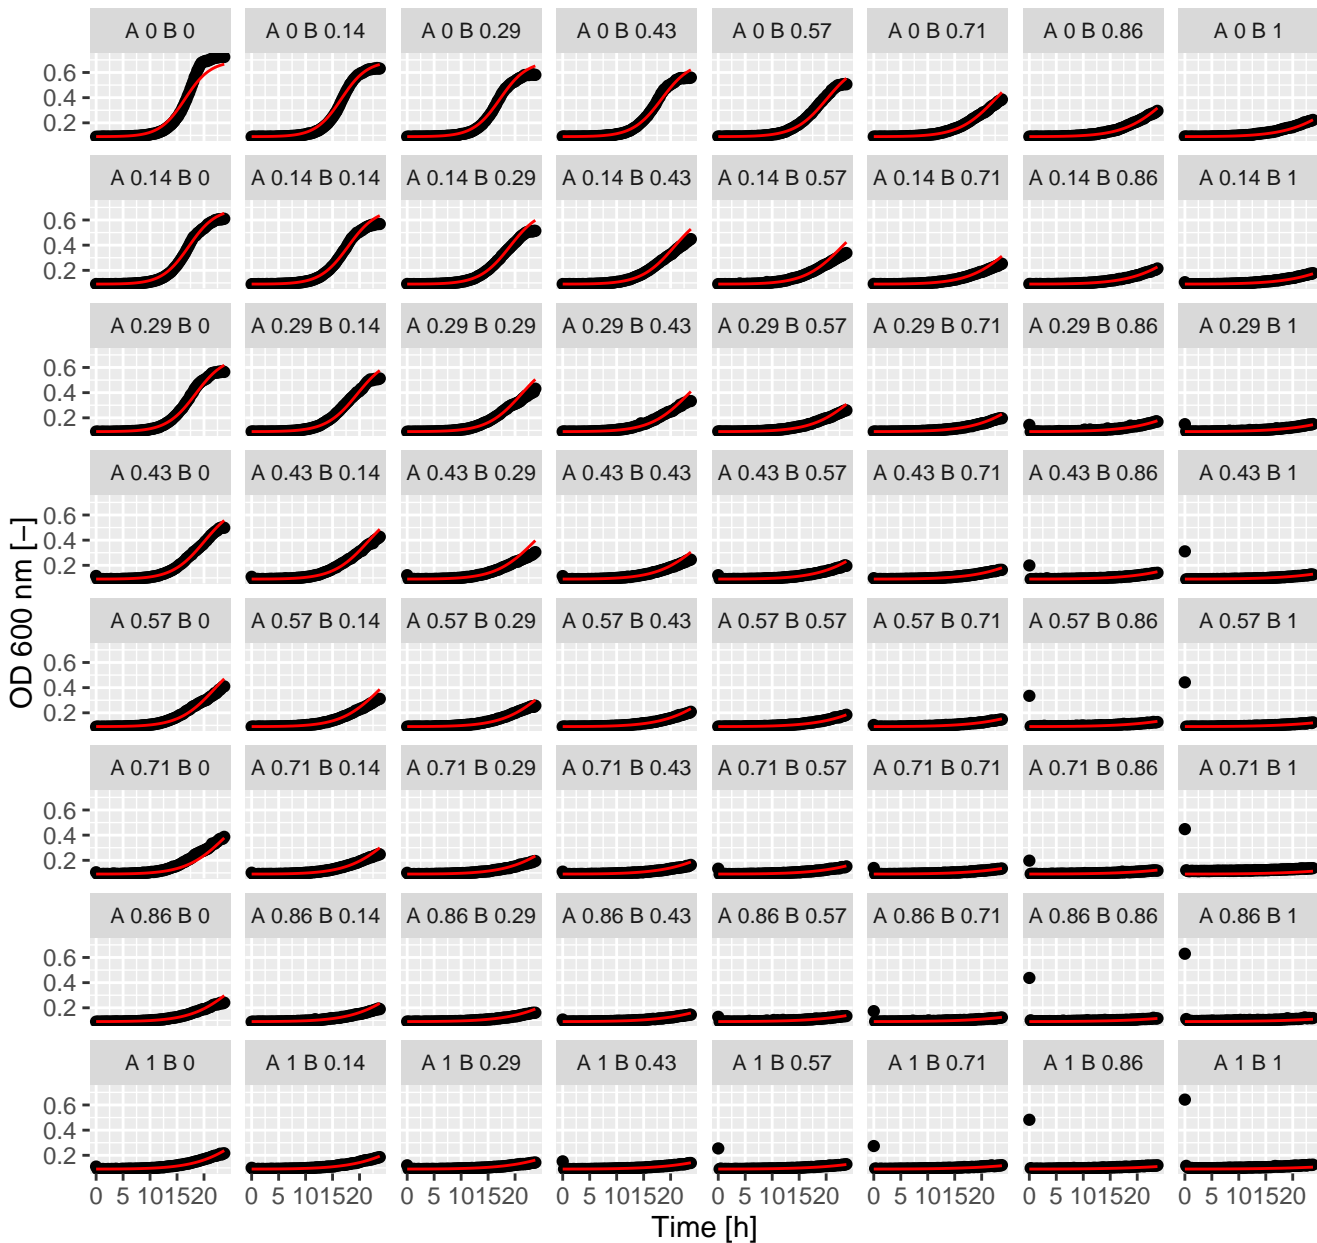

Met.Met (= Ax.Bx) full GPDI  
 Int\_AB = -0.07 and Int\_BA = -0.04 at EC50

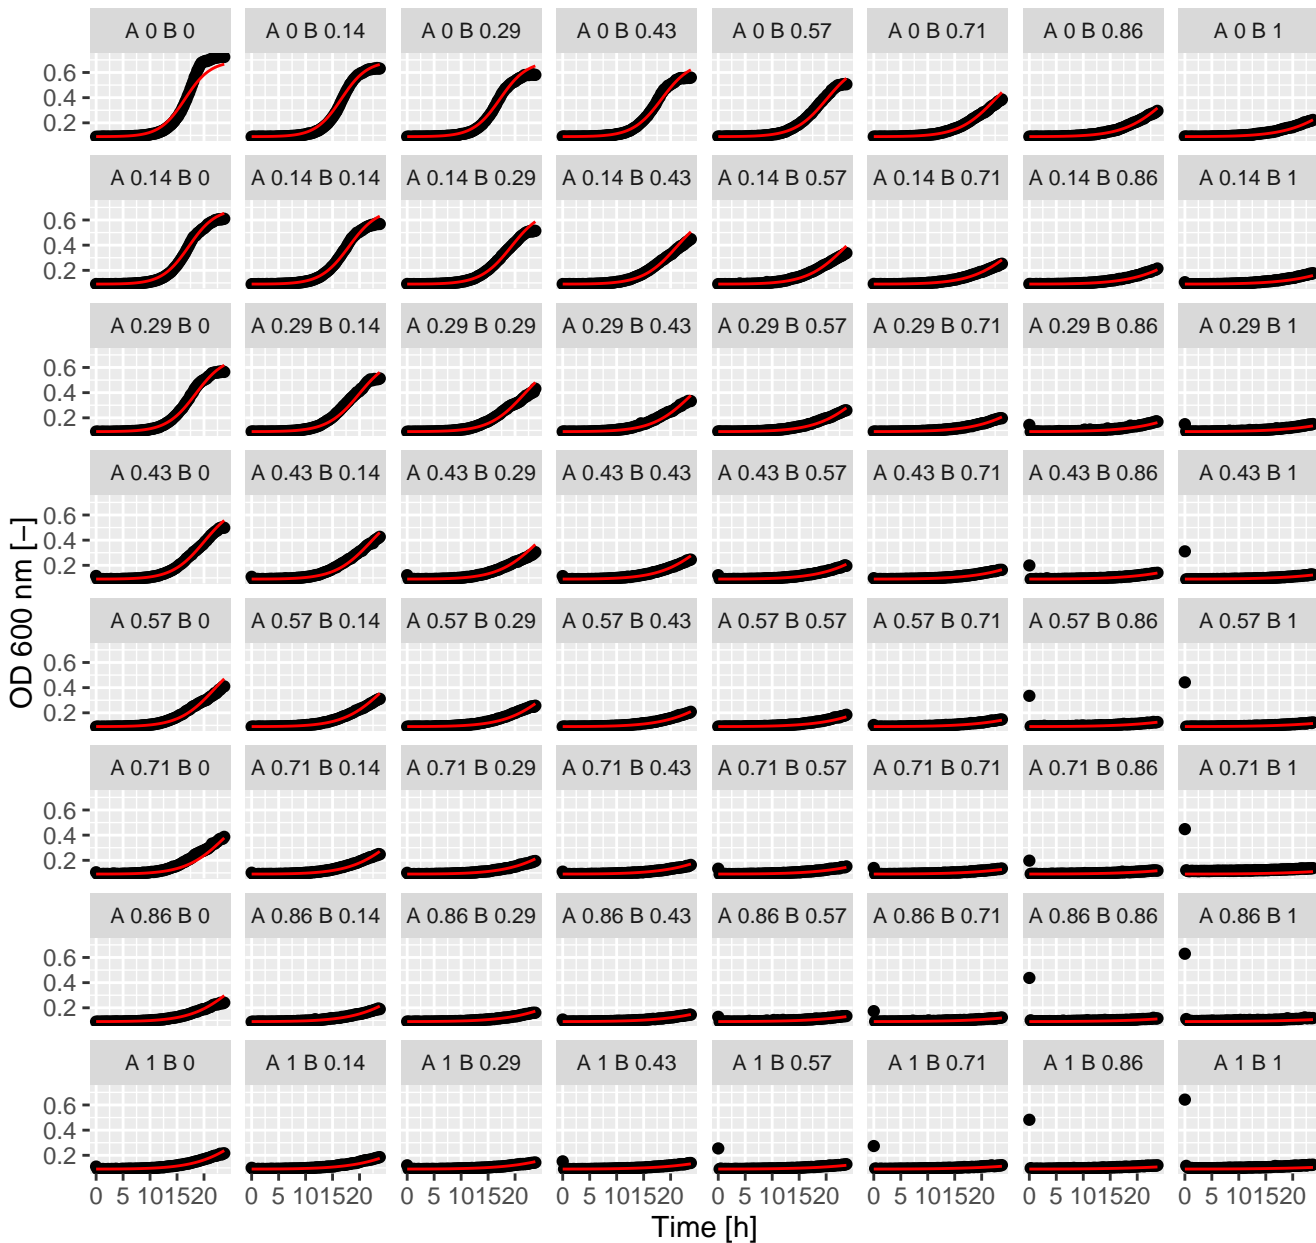

Met.Pen (= Ax.Bx) exp. additivity (LA)  
Int\_AB = 0 and Int\_BA = 0 at EC50

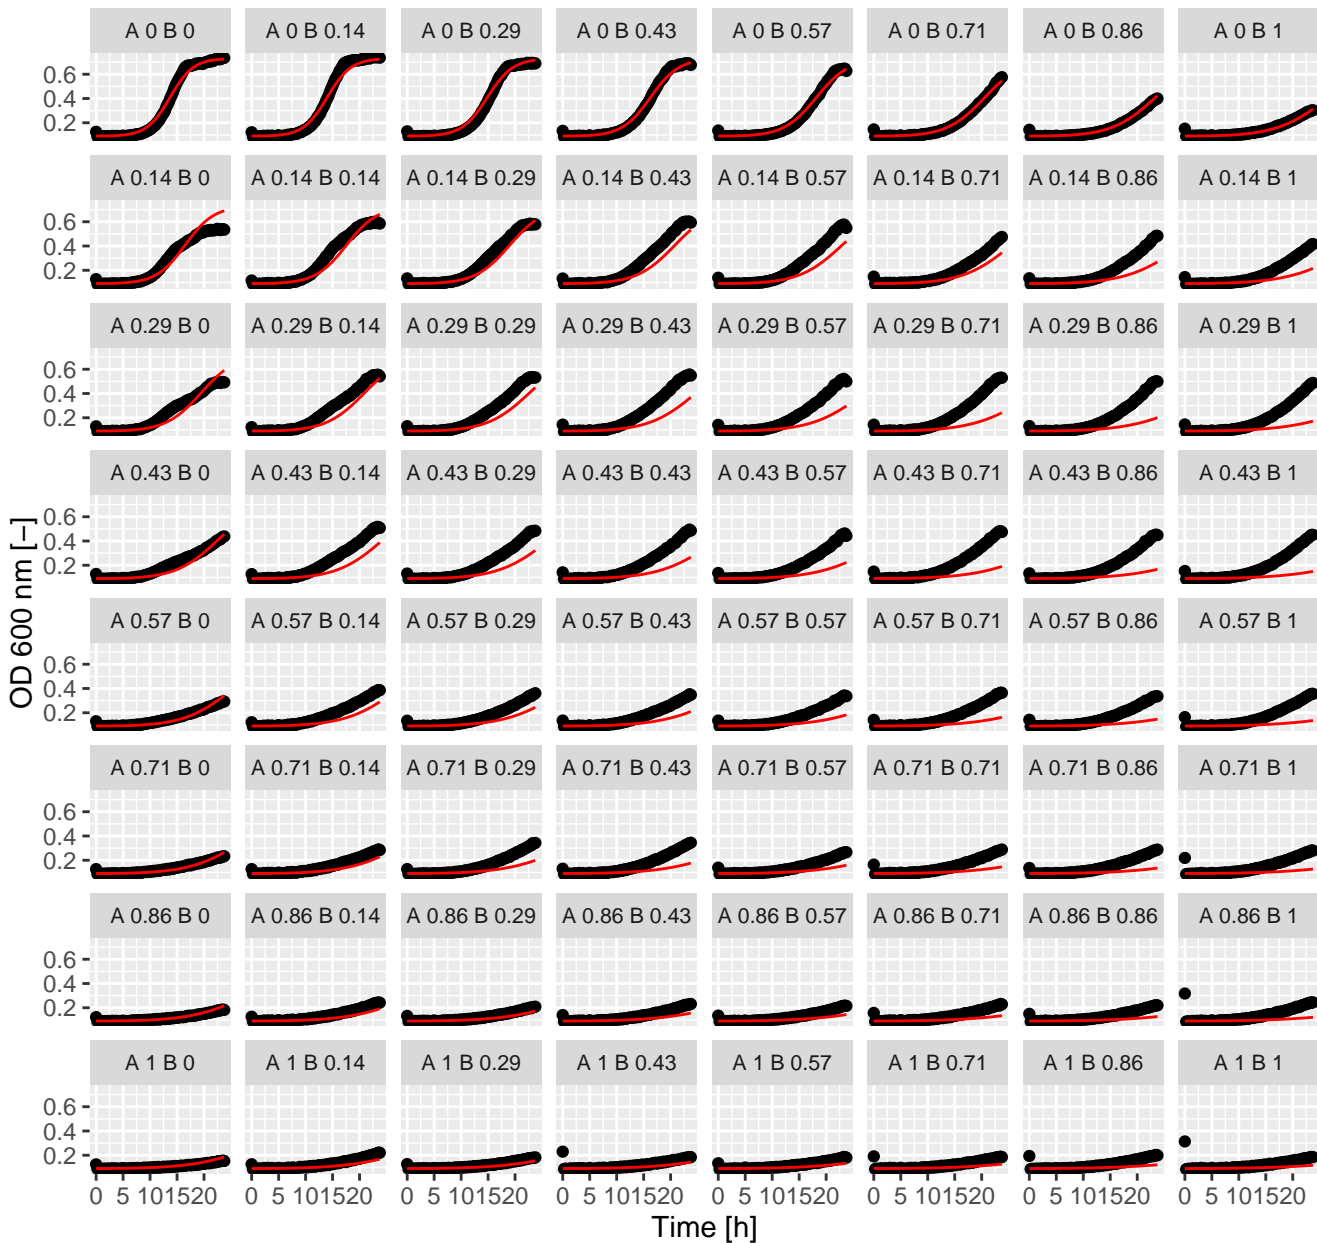

Met.Pen (= Ax.Bx) full GPDI  
 Int\_AB = 0.51 and Int\_BA = 2.08 at EC50

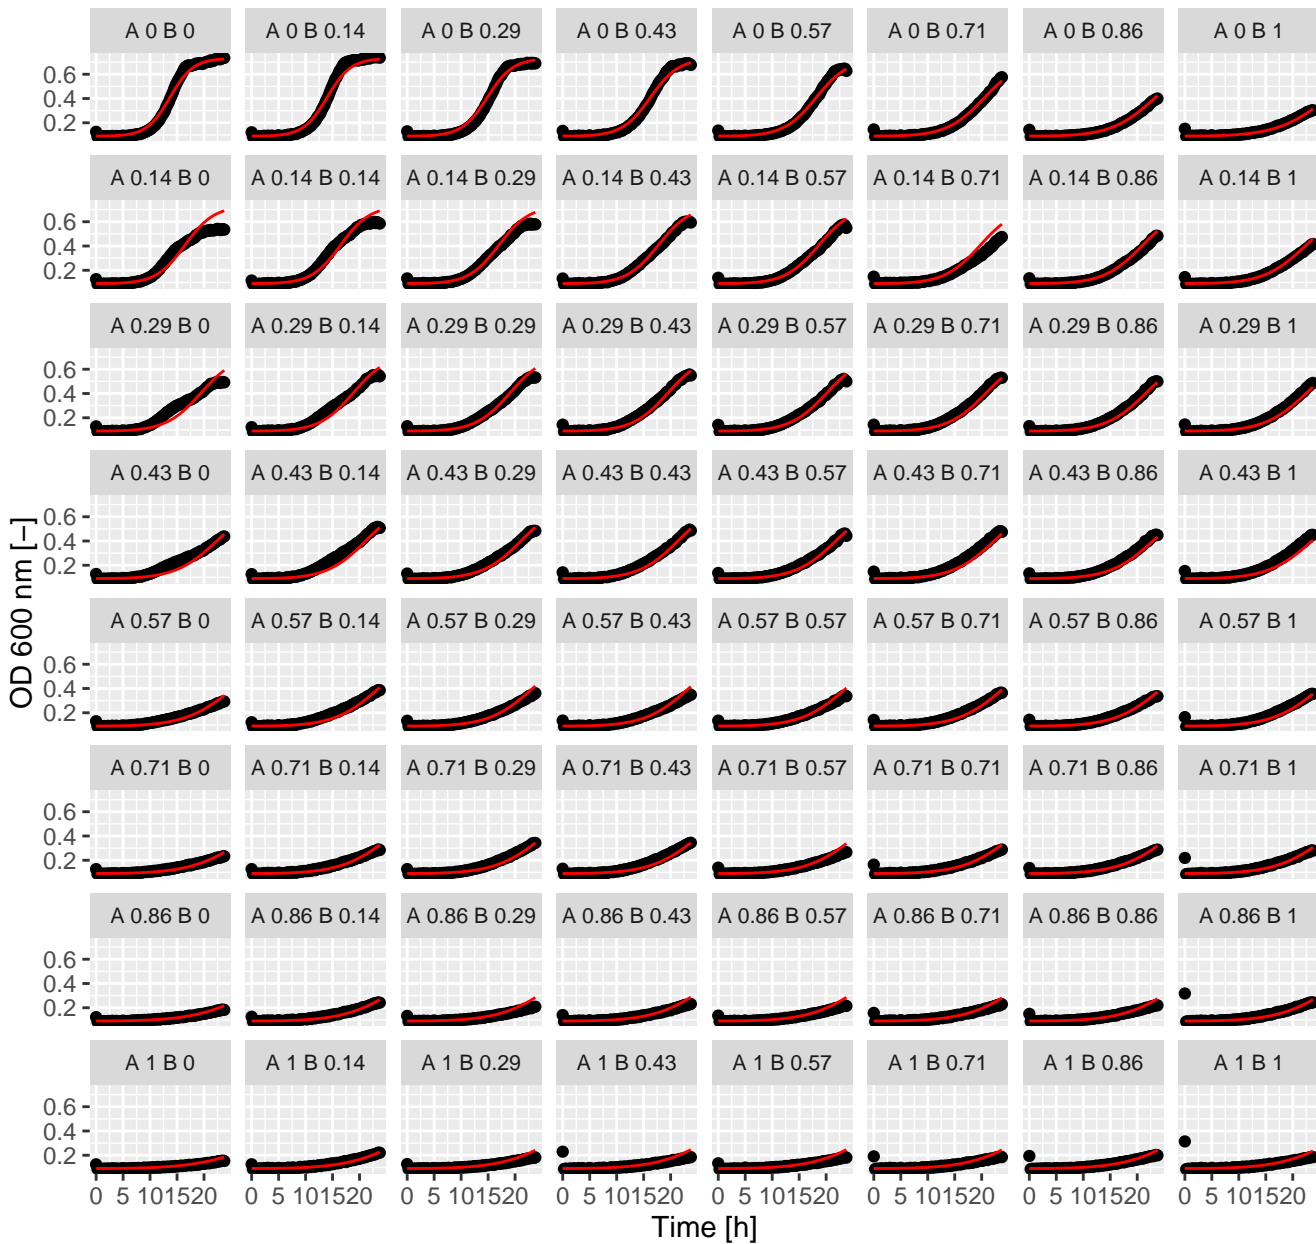

Met.Sta (= Ax.Bx) exp. additivity (LA)  
Int\_AB = 0 and Int\_BA = 0 at EC50

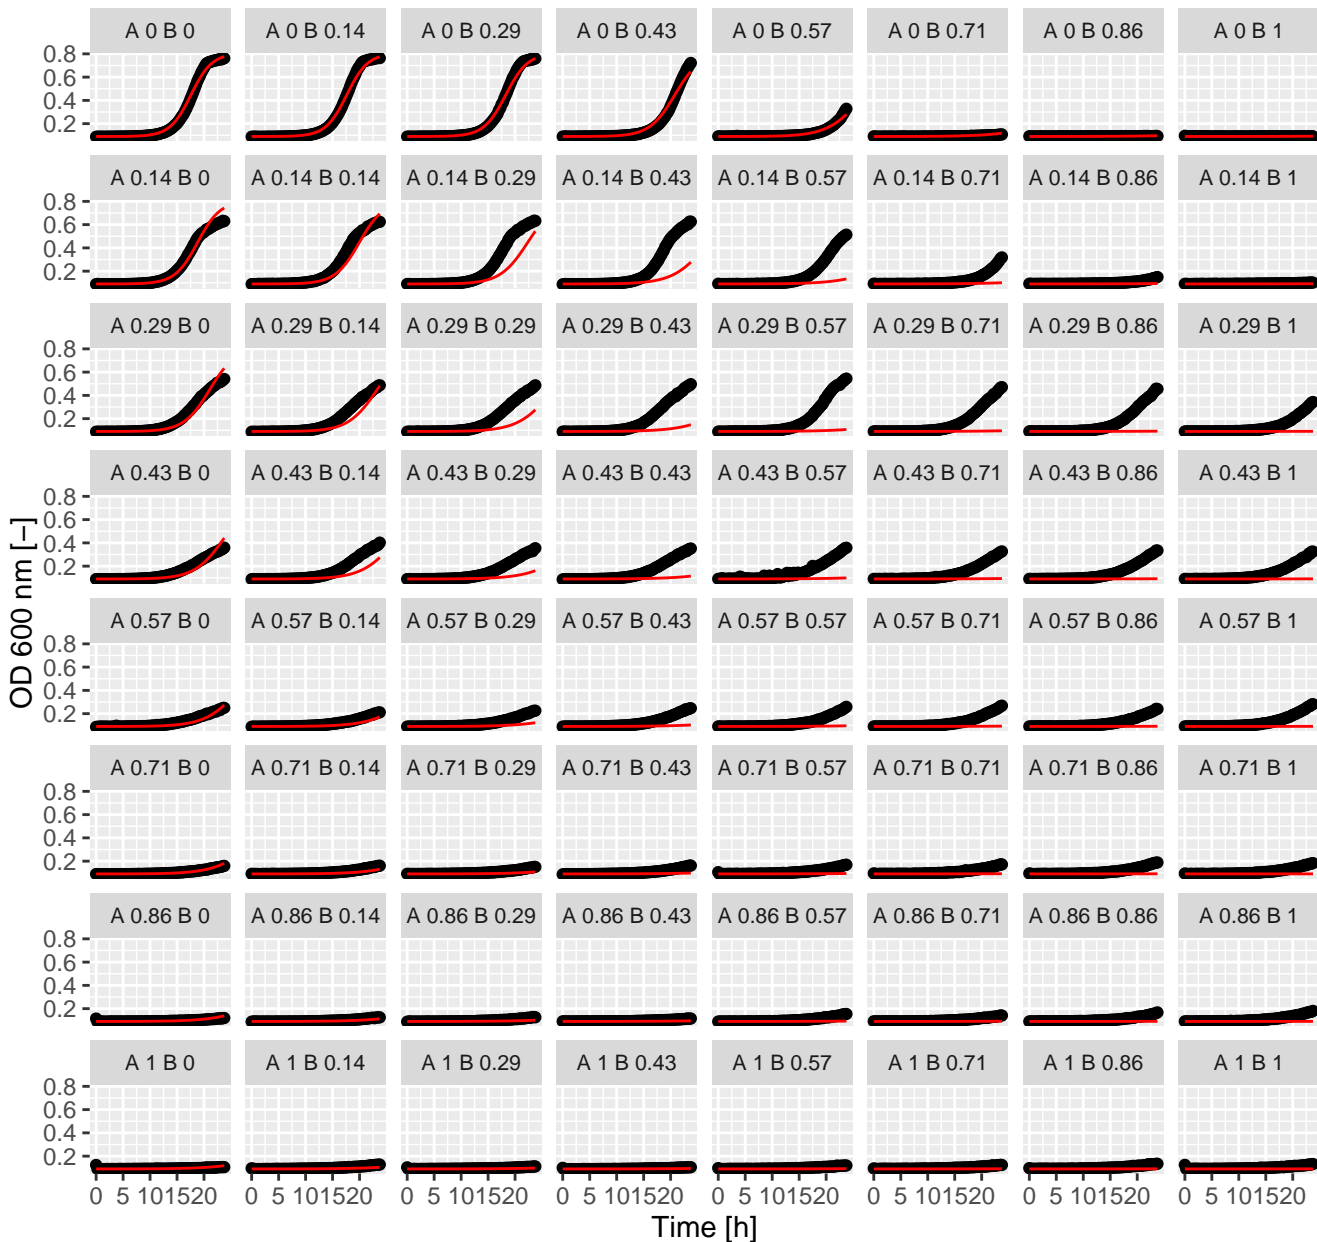

Met.Sta (= Ax.Bx) full GPDI  
 Int\_AB = 0.46 and Int\_BA = 4.34 at EC50

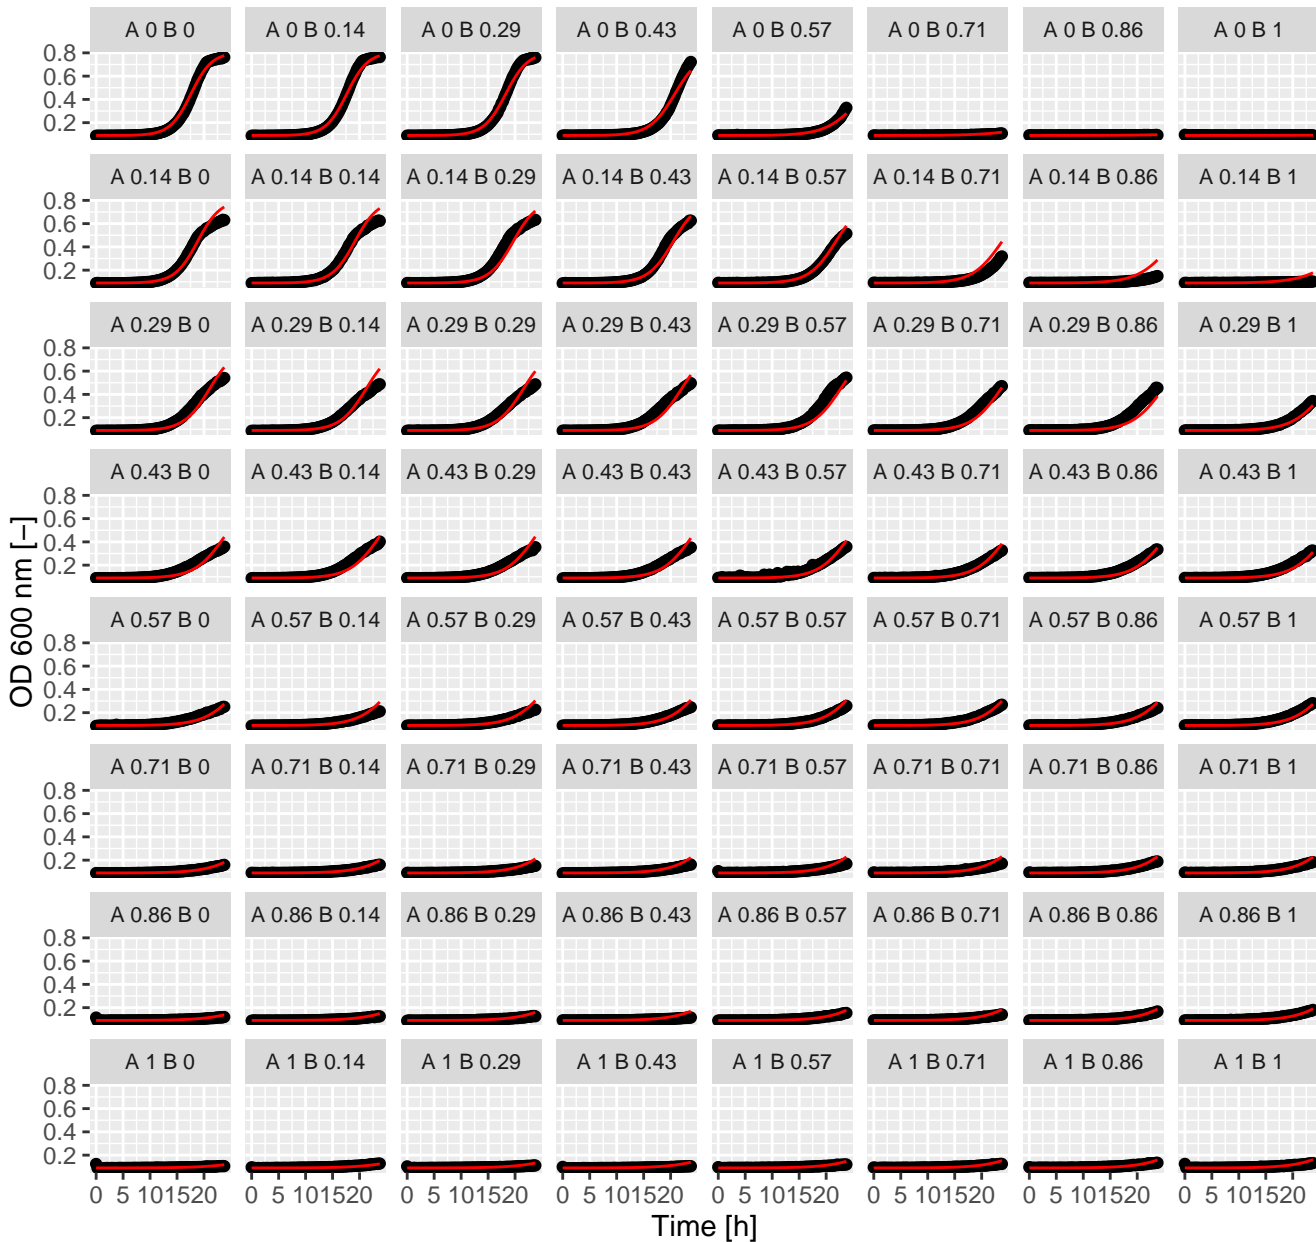

Met.Tac (= Ax.Bx) exp. additivity (LA)  
Int\_AB = 0 and Int\_BA = 0 at EC50

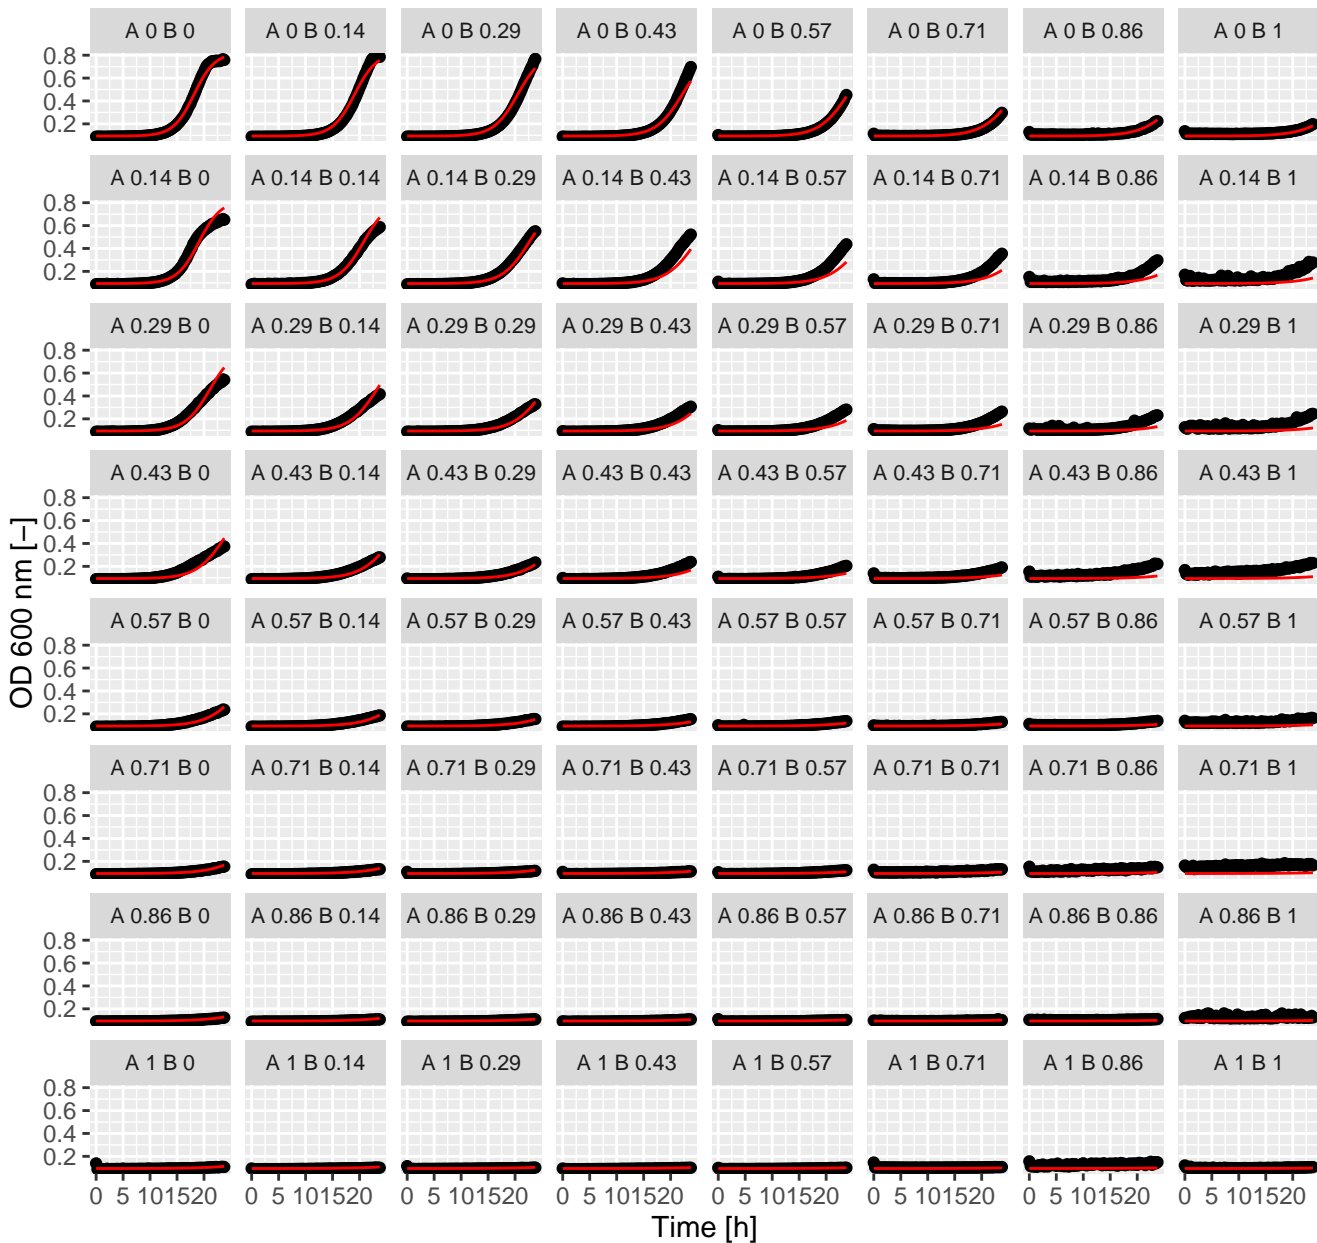

Met.Tac (= Ax.Bx) full GPDI  
Int\_AB = 0.04 and Int\_BA = 2.27 at EC50

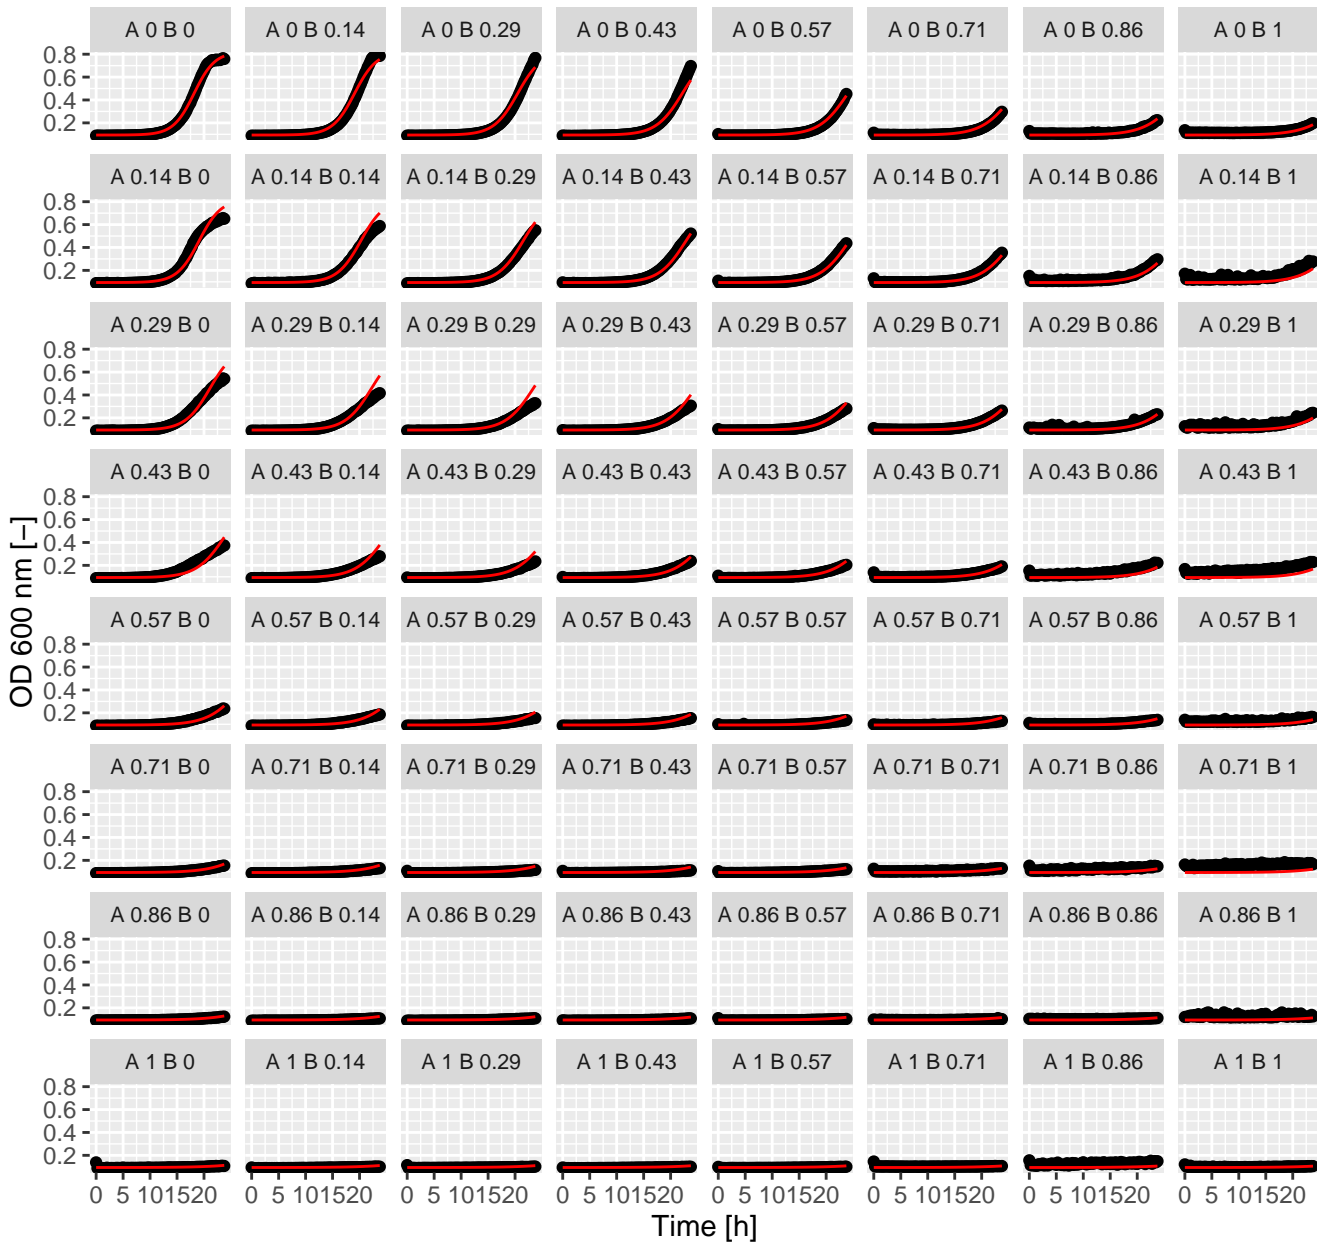



Met.Ter (= Ax.Bx) exp. additivity (LA)  
Int\_AB = 0 and Int\_BA = 0 at EC50

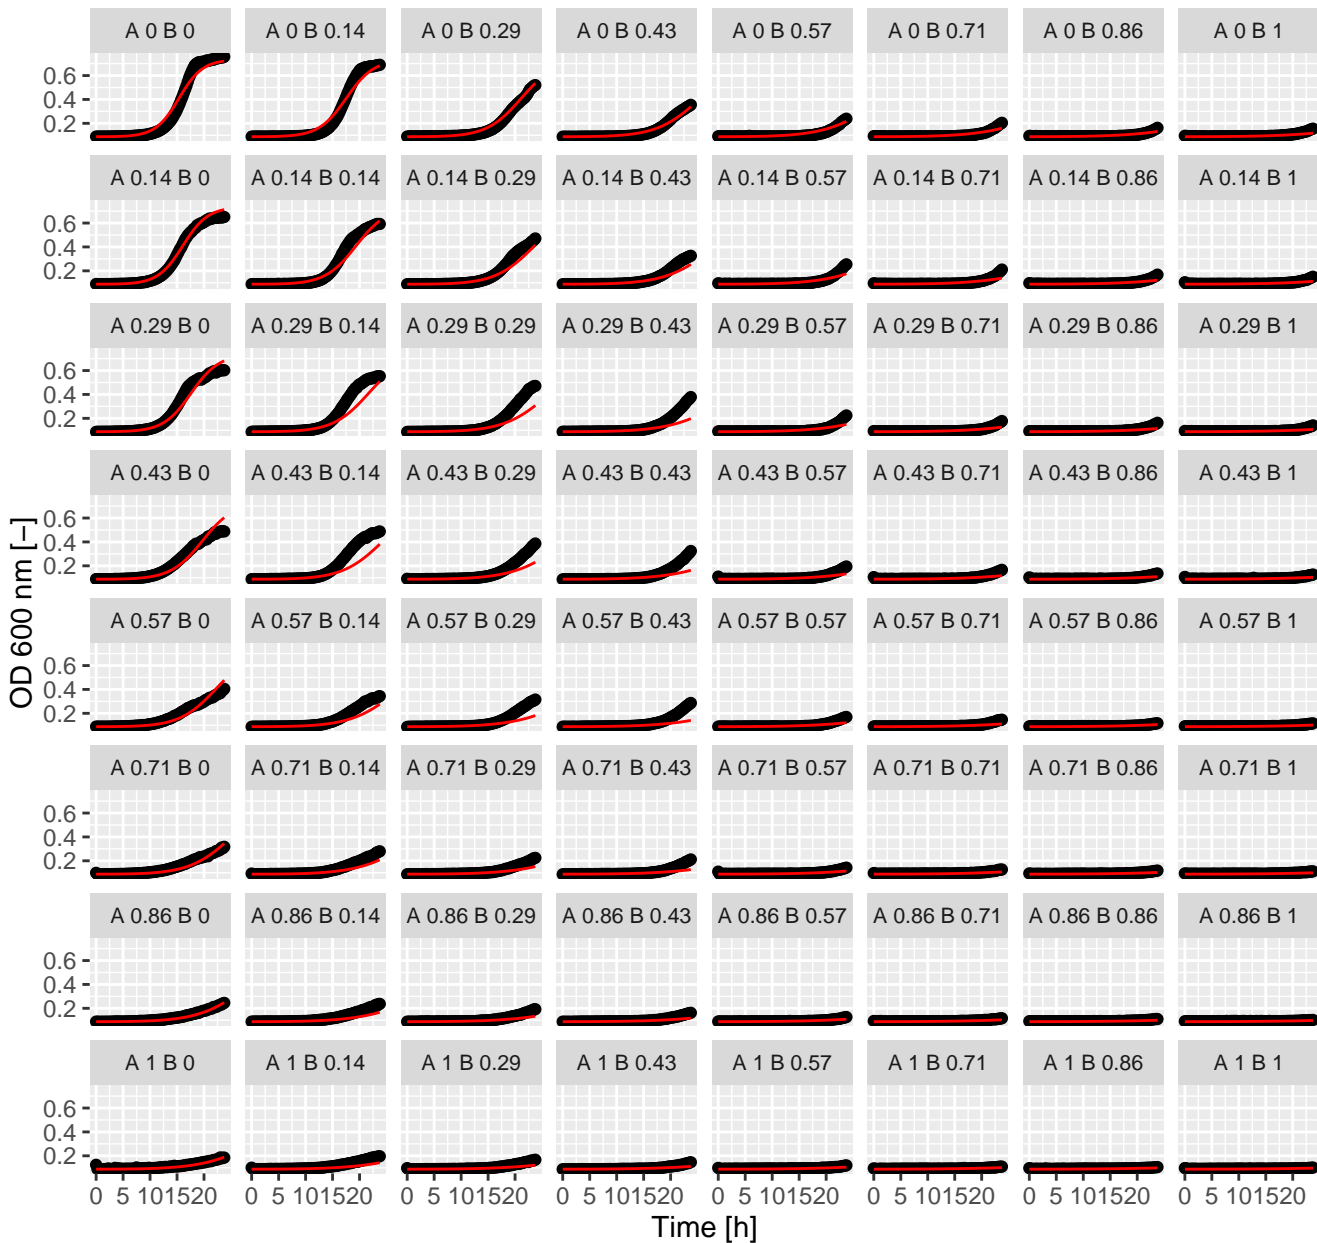

Met.Ter (= Ax.Bx) full GPDI  
Int\_AB = 0.28 and Int\_BA = 0.49 at EC50

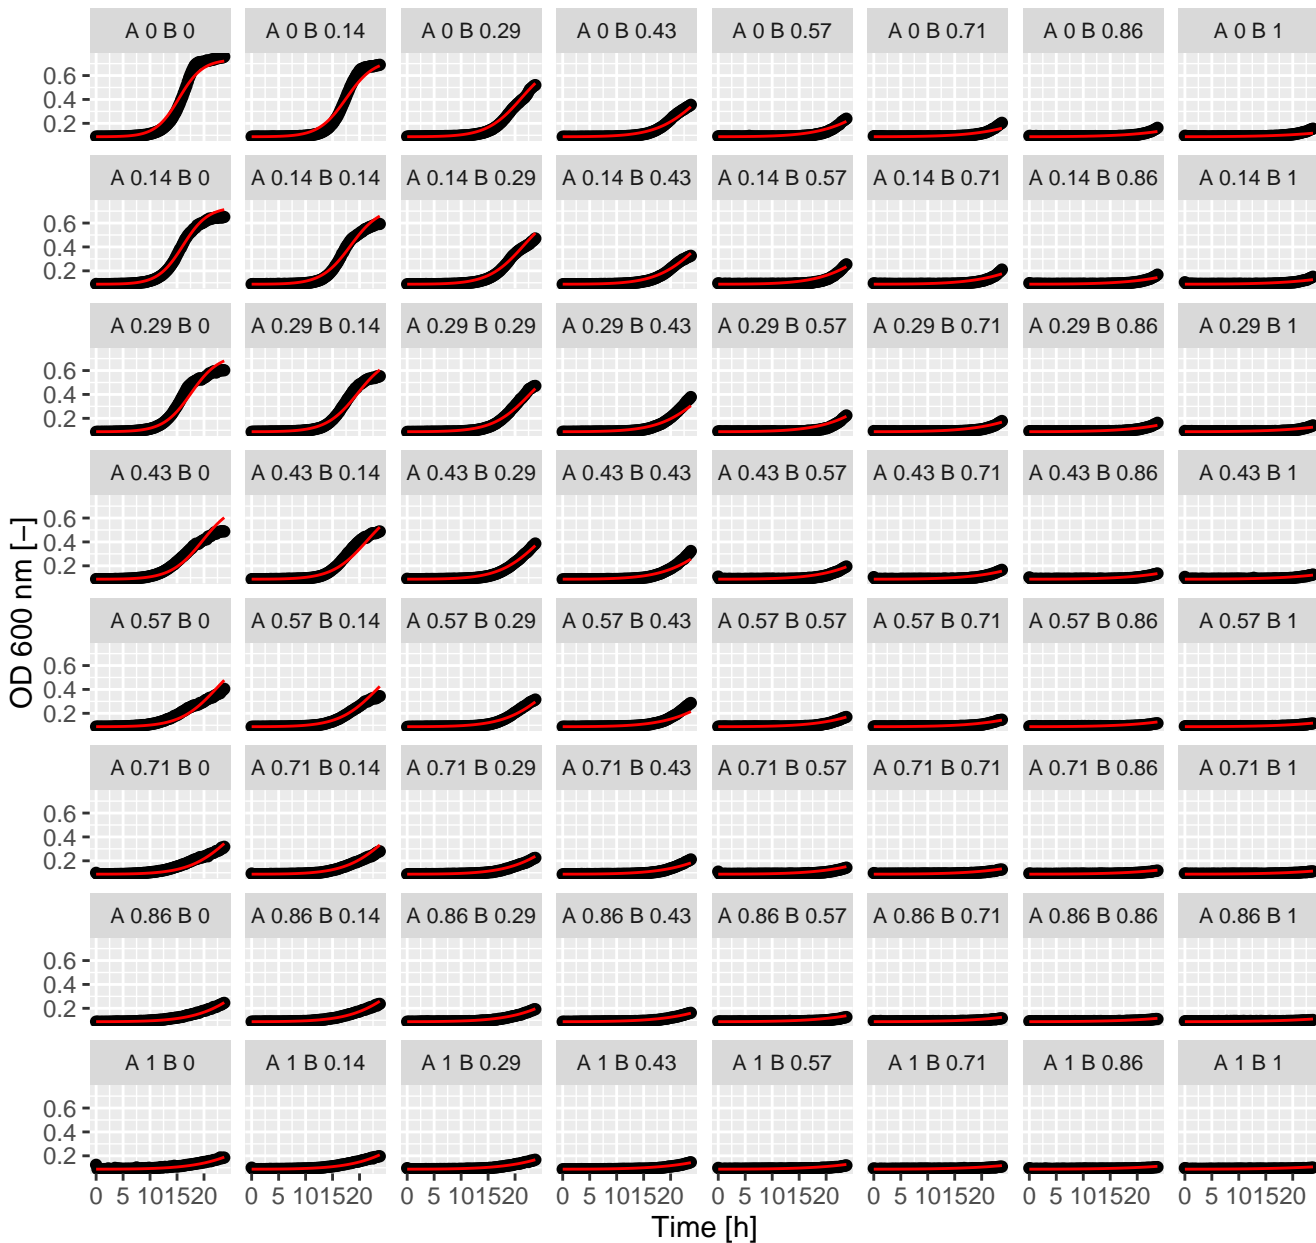

MMS.MMS (= Ax.Bx) exp. additivity (LA)  
Int\_AB = 0 and Int\_BA = 0 at EC50

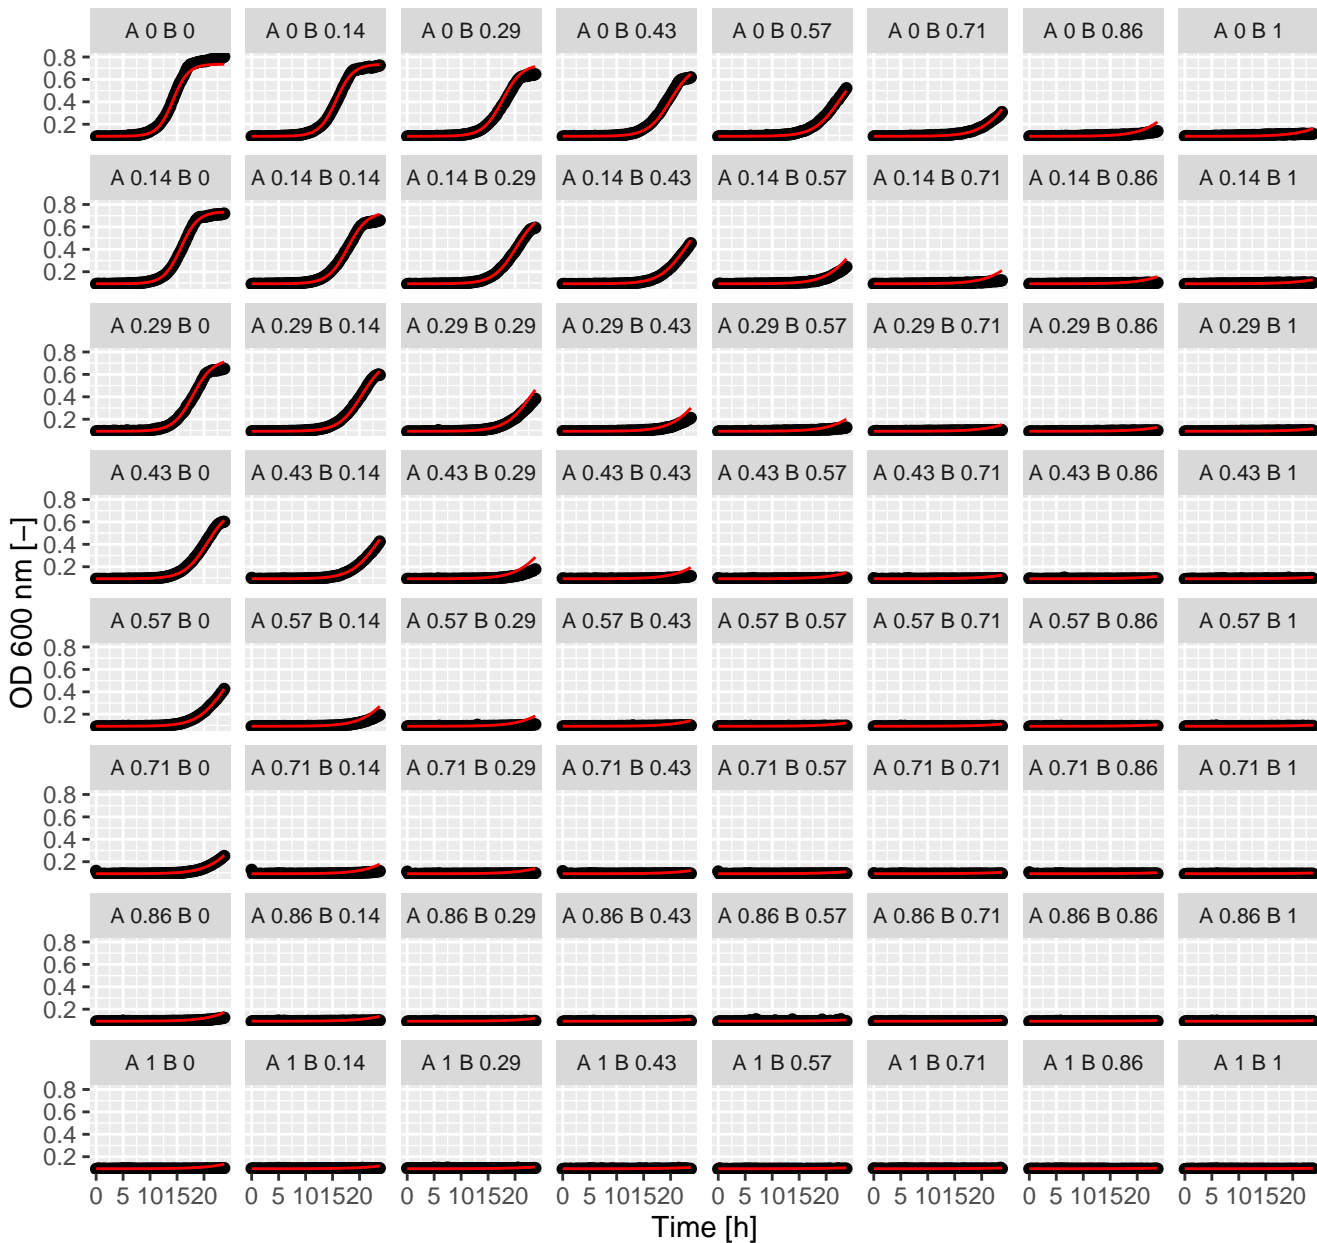

MMS.MMS (= Ax.Bx) full GPD1  
Int\_AB = -0.34 and Int\_BA = 0.03 at EC50

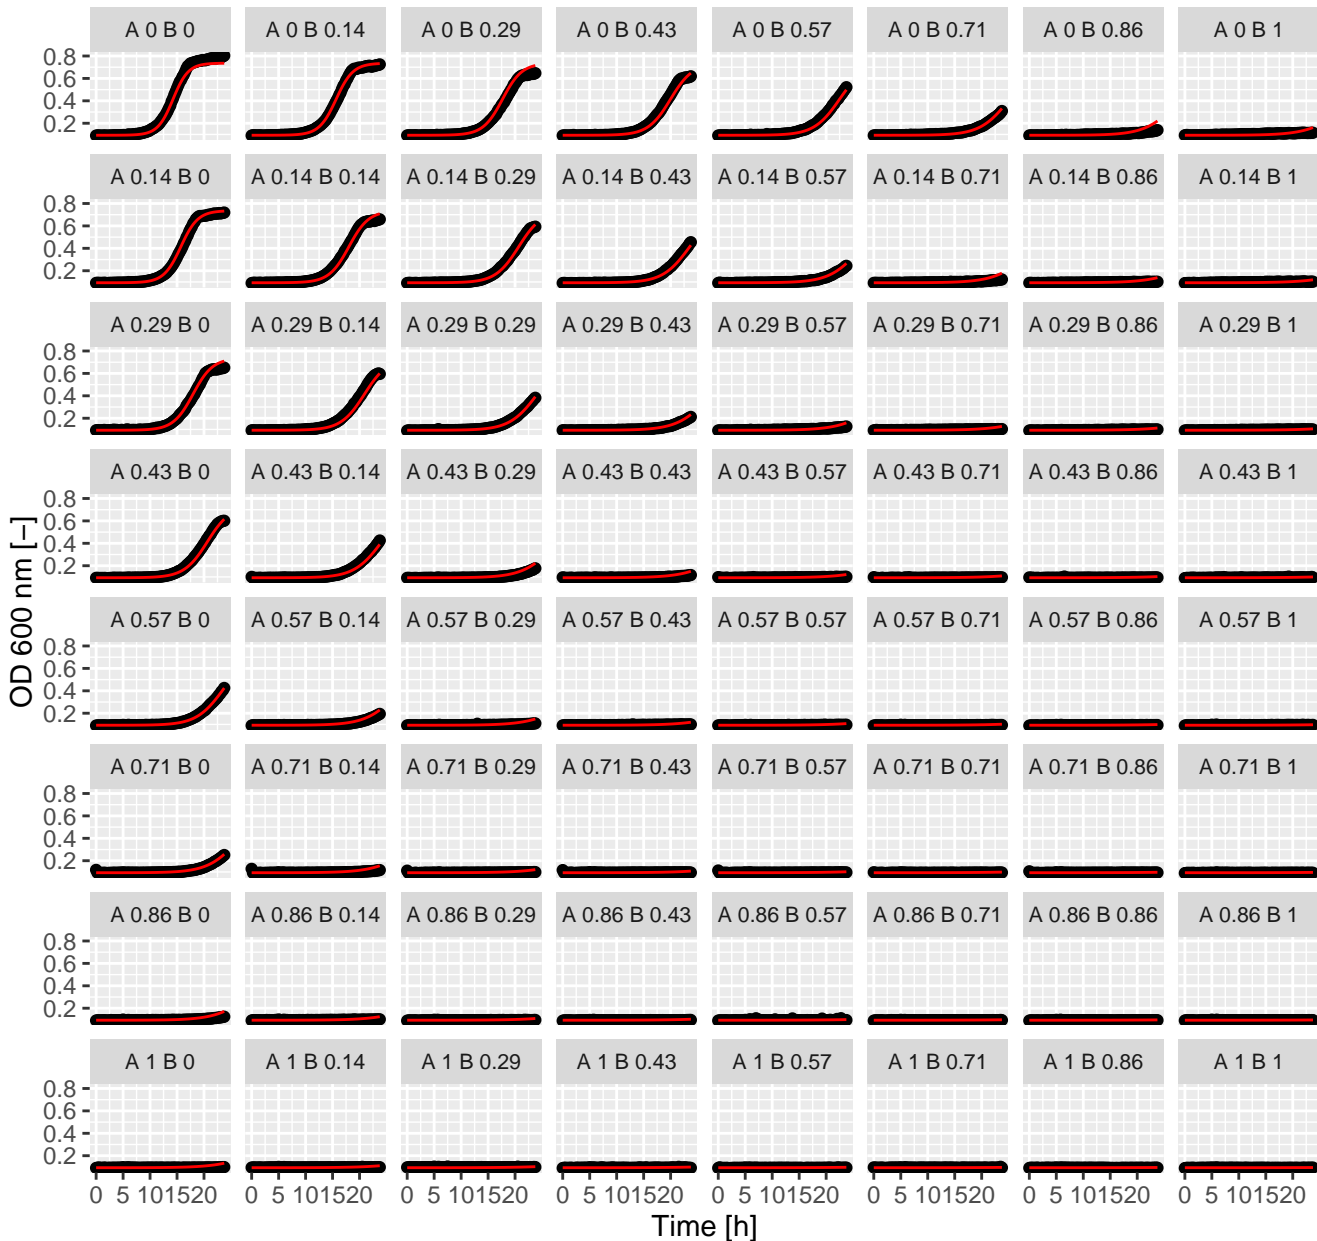

MMS.Pen (= Ax.Bx) exp. additivity (LA)  
Int\_AB = 0 and Int\_BA = 0 at EC50

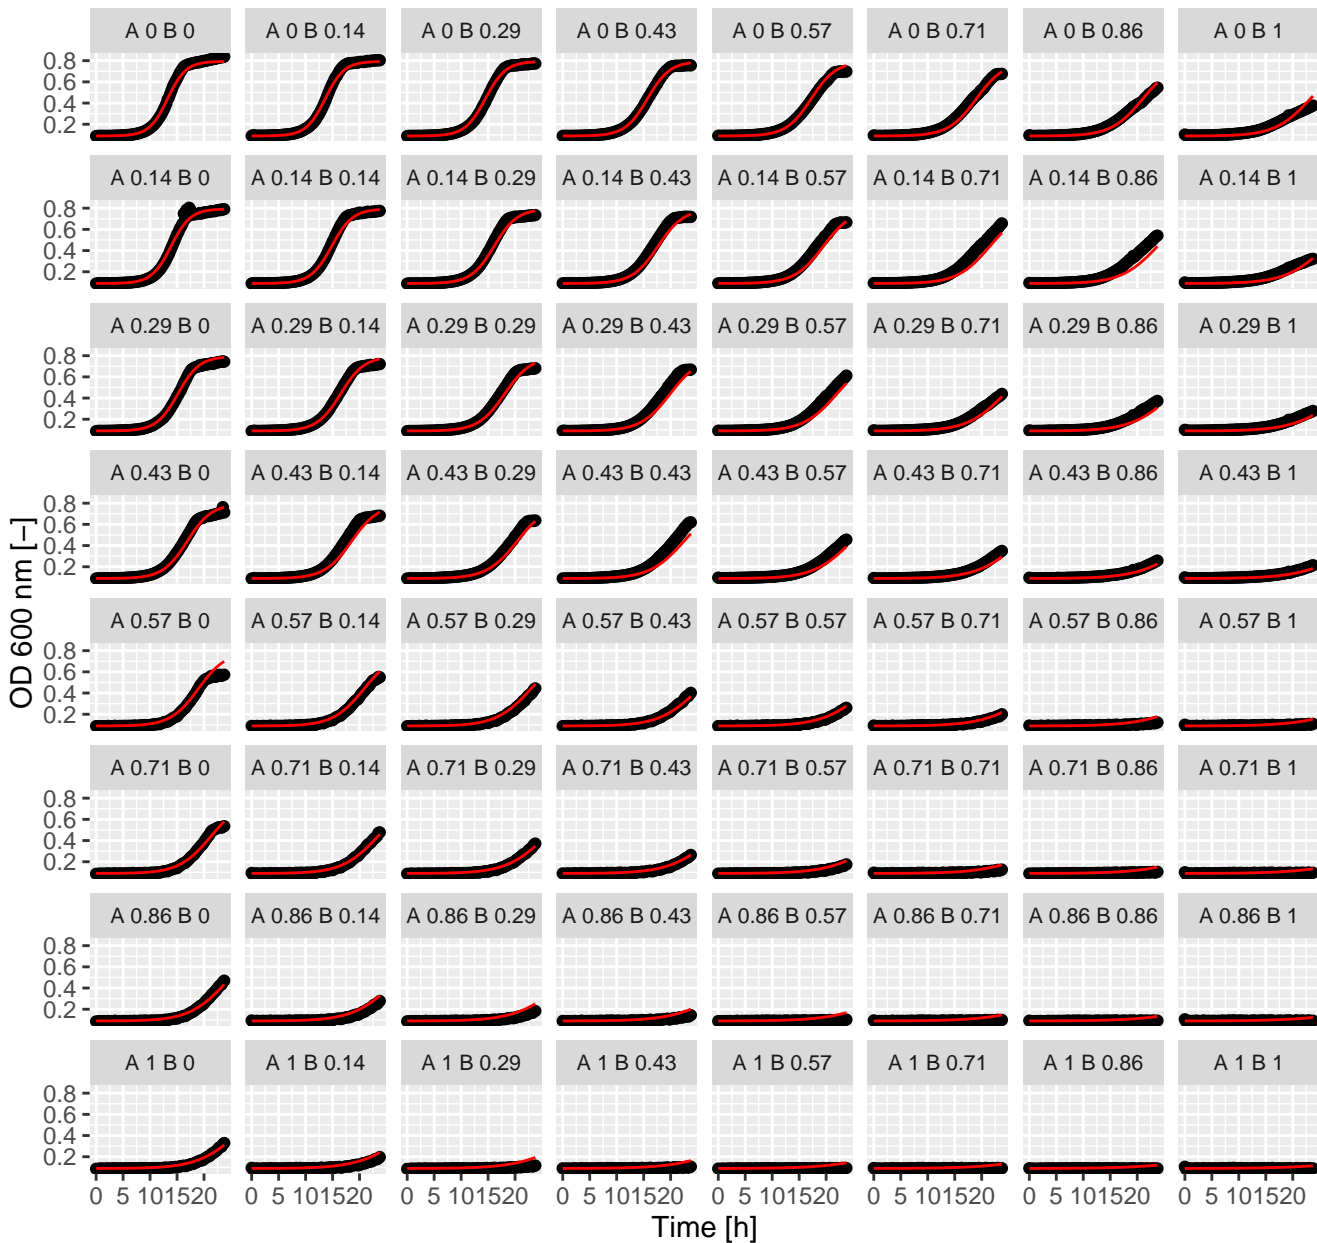

MMS.Pen (= Ax.Bx) full GPDI  
Int\_AB = -0.36 and Int\_BA = 0.61 at EC50

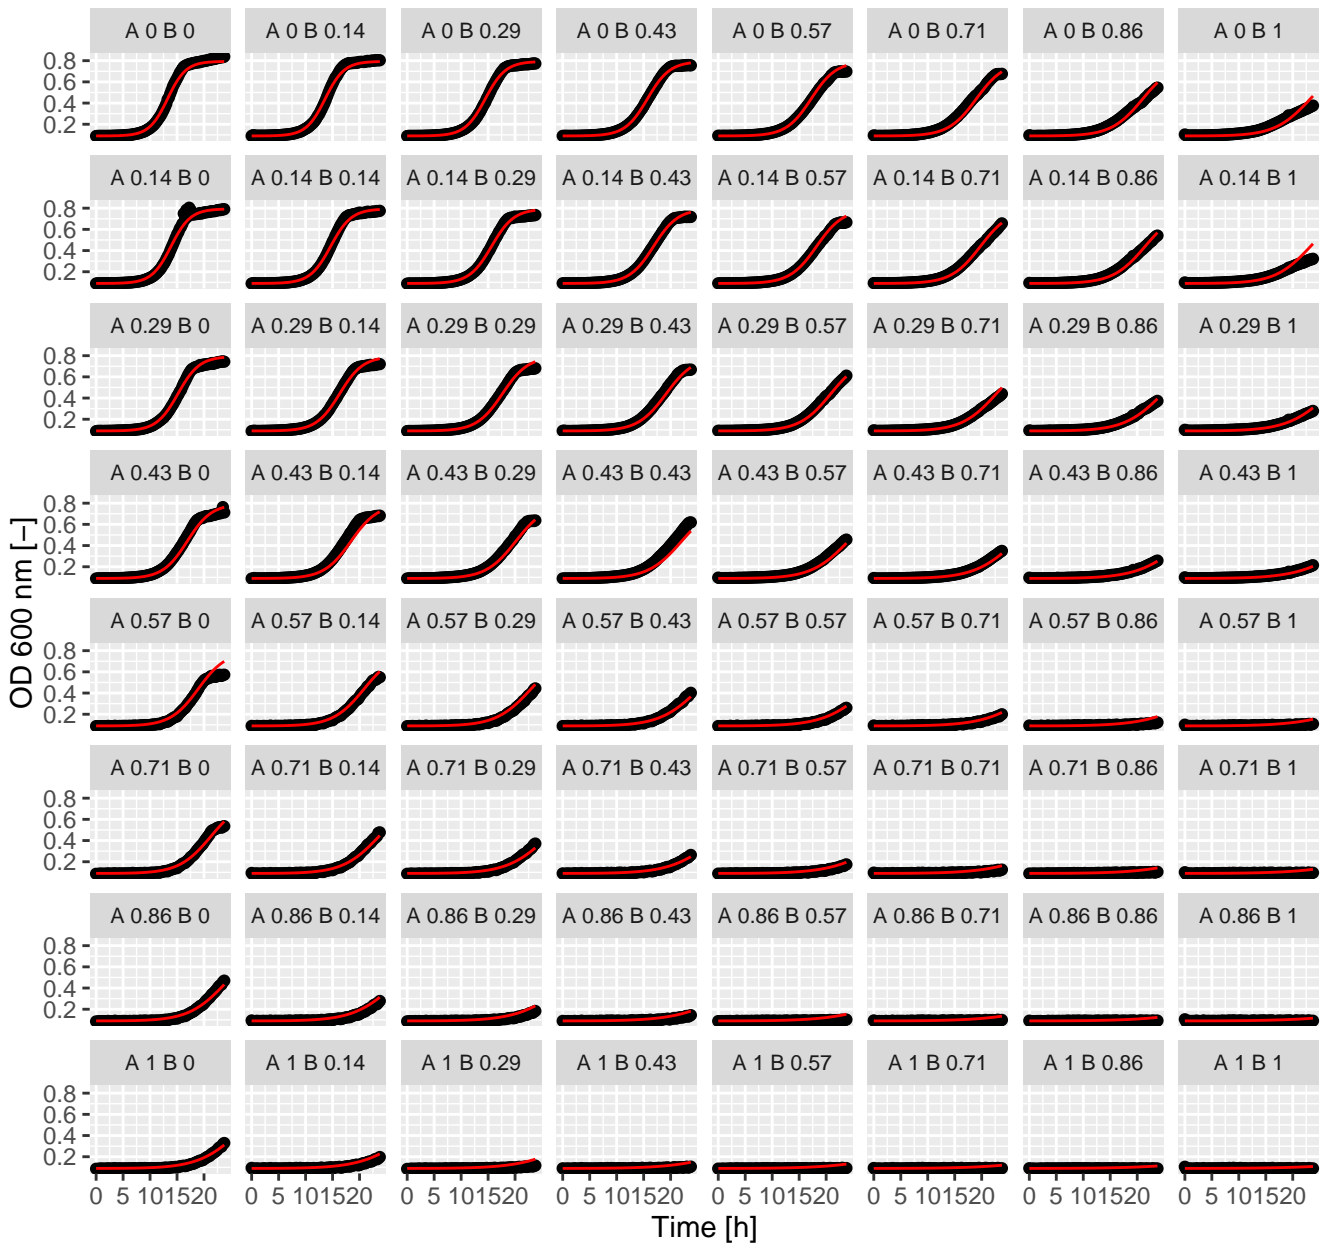

MMS.Sta (= Ax.Bx) exp. additivity (LA)  
Int\_AB = 0 and Int\_BA = 0 at EC50

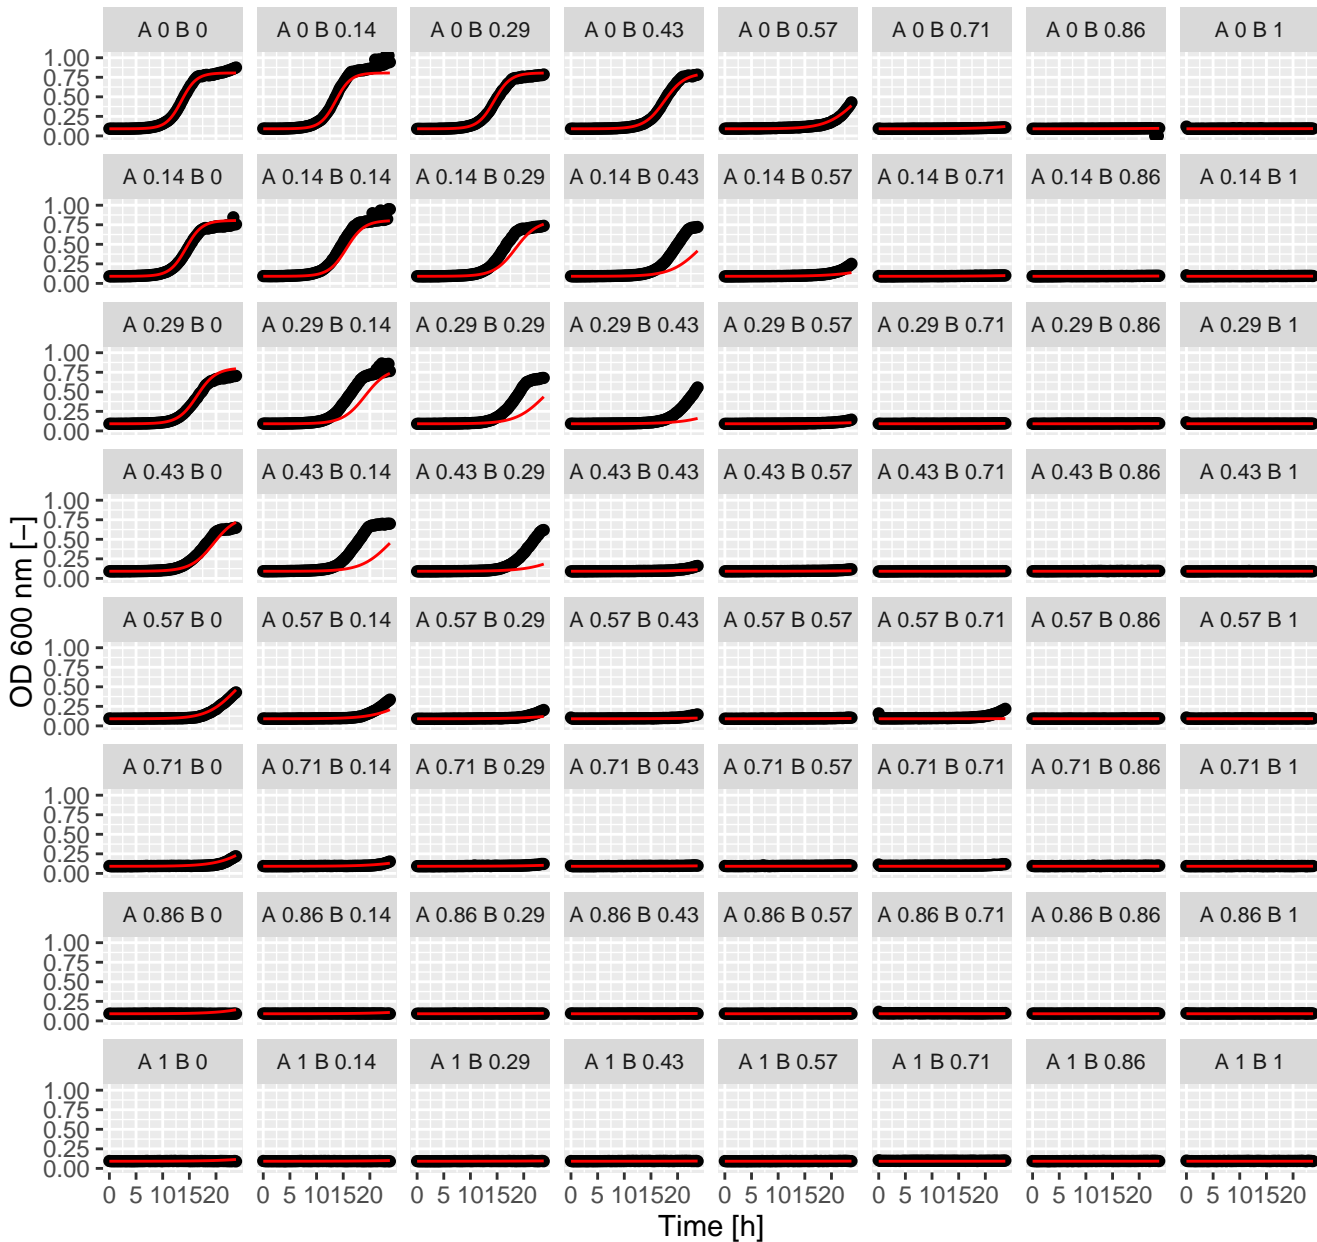

MMS.Sta (= Ax.Bx) full GPDI  
Int\_AB = 0.59 and Int\_BA = 0.16 at EC50

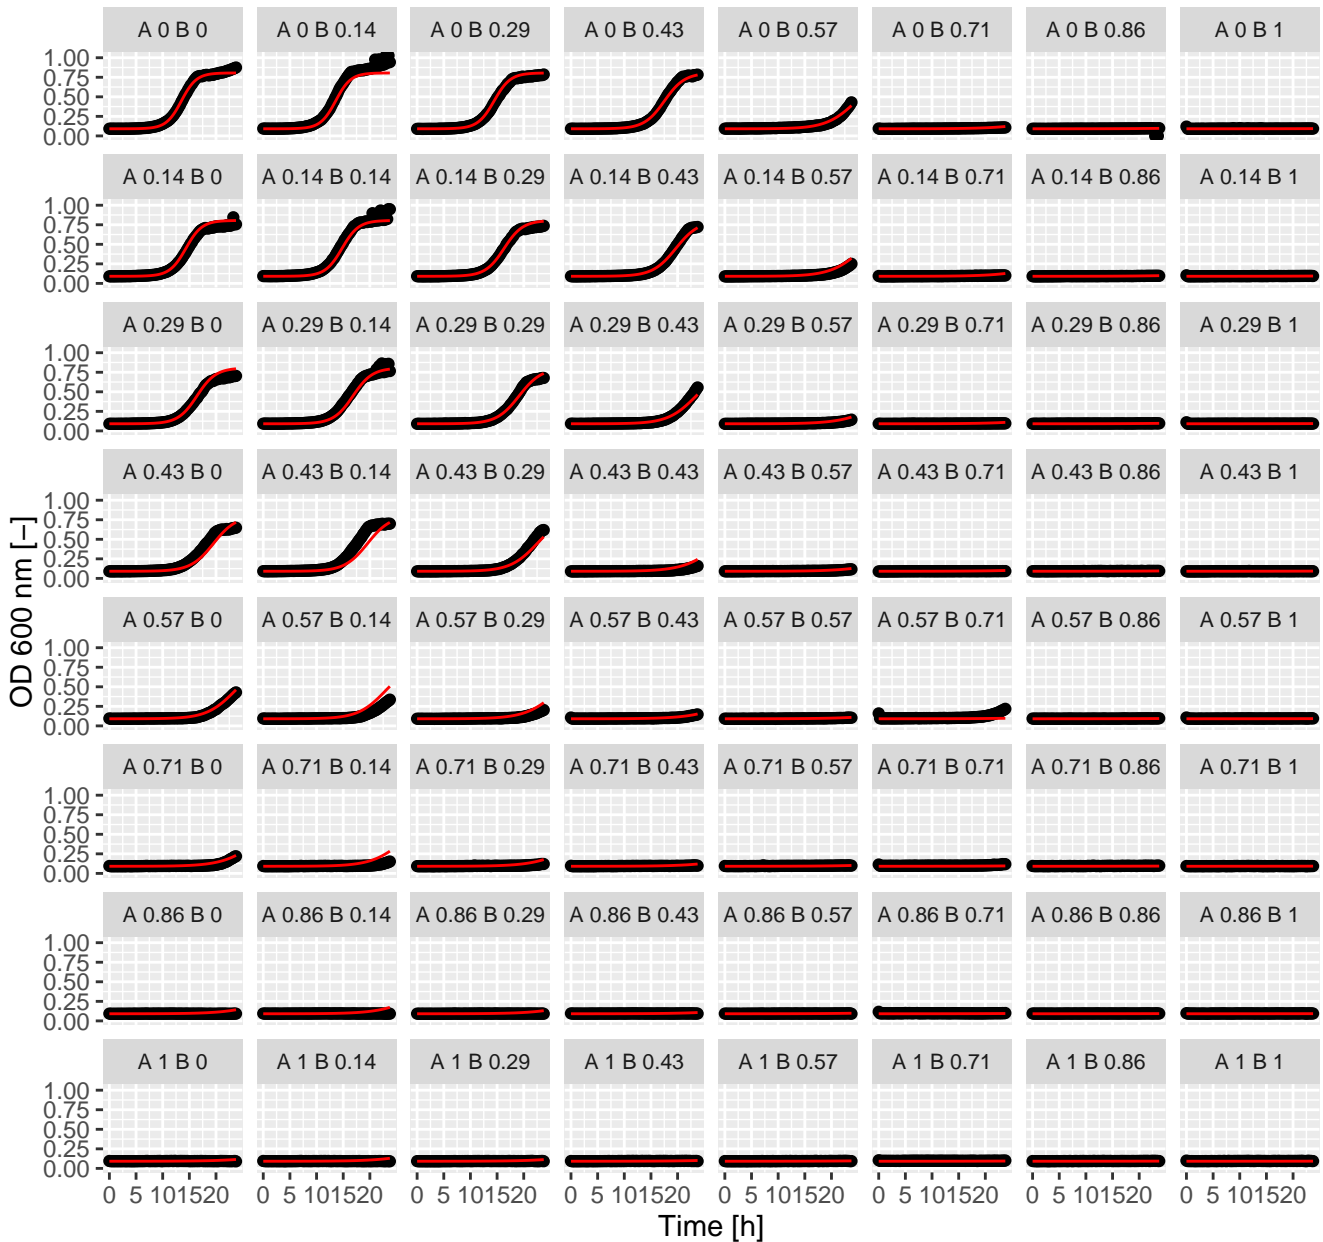



MMS.Tac (= Ax.Bx) exp. additivity (LA)  
Int\_AB = 0 and Int\_BA = 0 at EC50

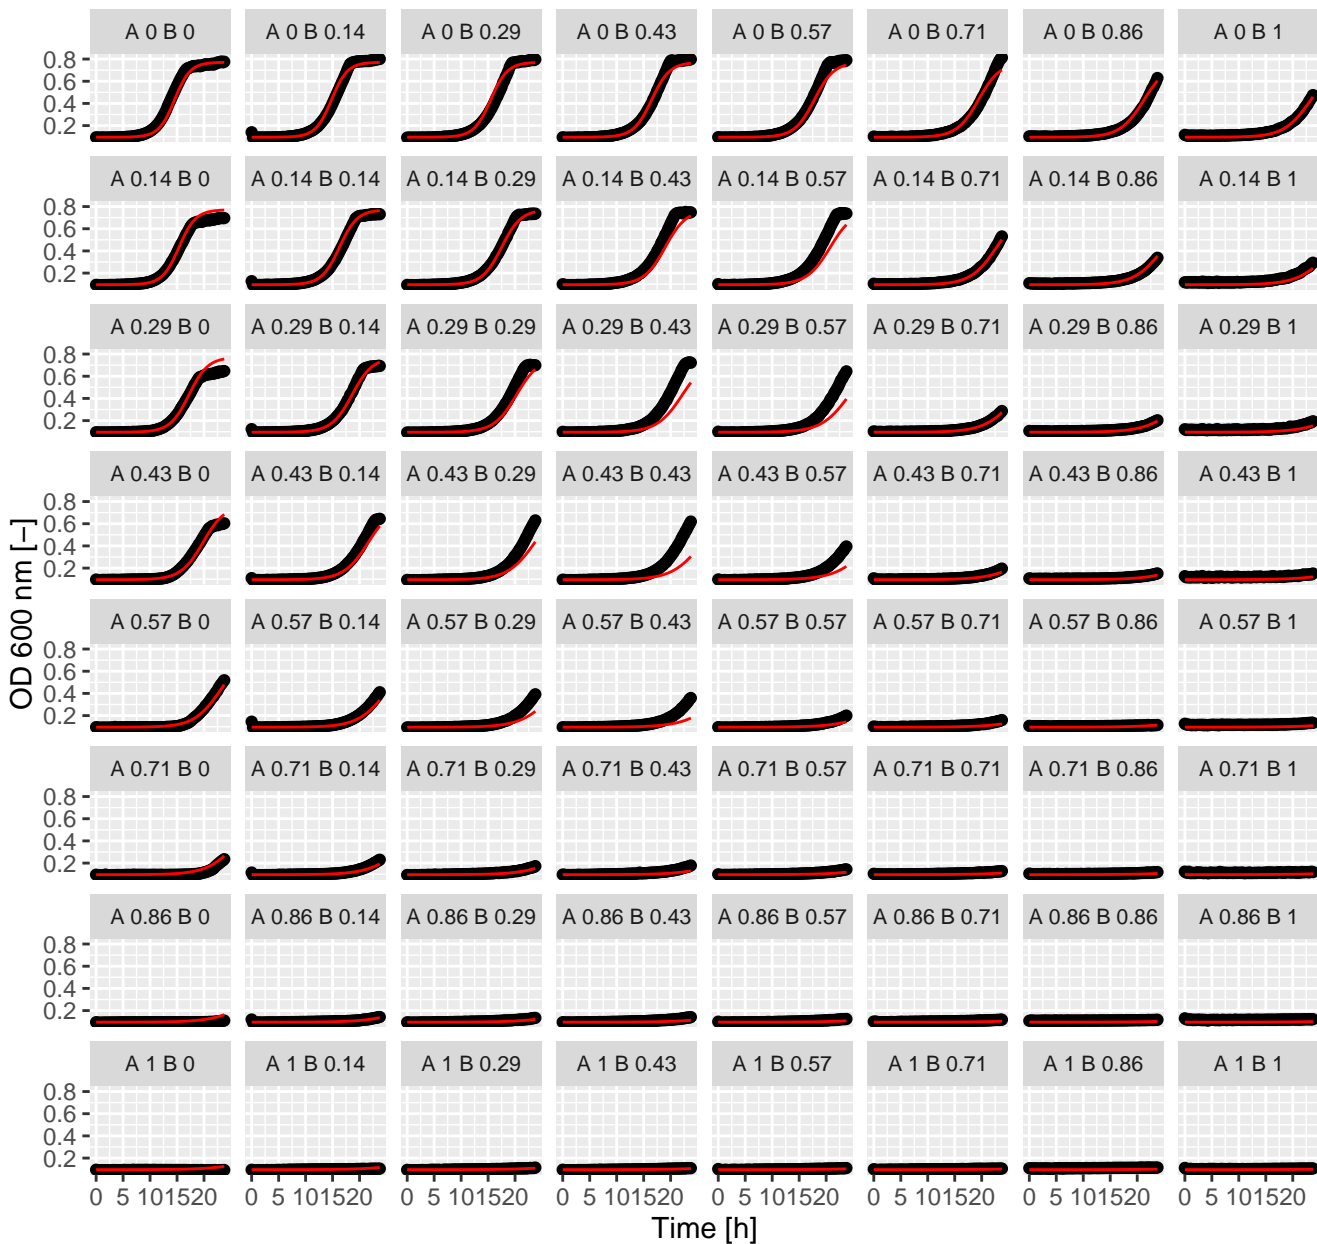

MMS.Tac (= Ax.Bx) full GPDI  
Int\_AB = 1.51 and Int\_BA = -0.22 at EC50

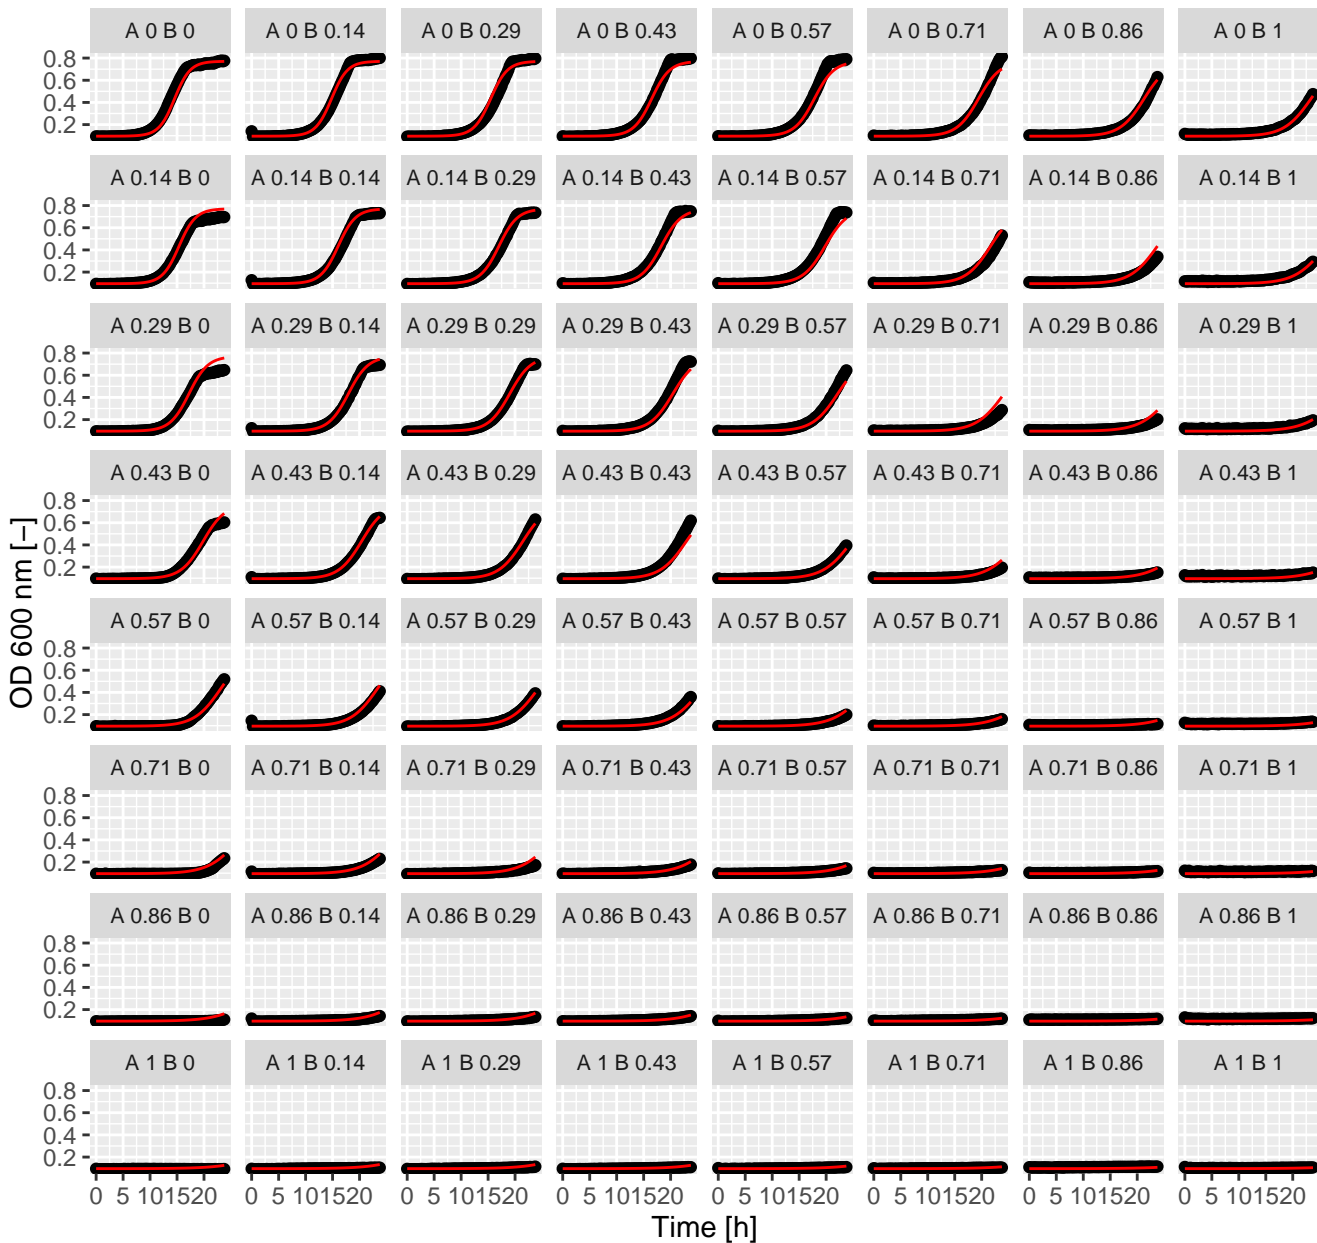

MMS.Ter (= Ax.Bx) exp. additivity (LA)  
Int\_AB = 0 and Int\_BA = 0 at EC50

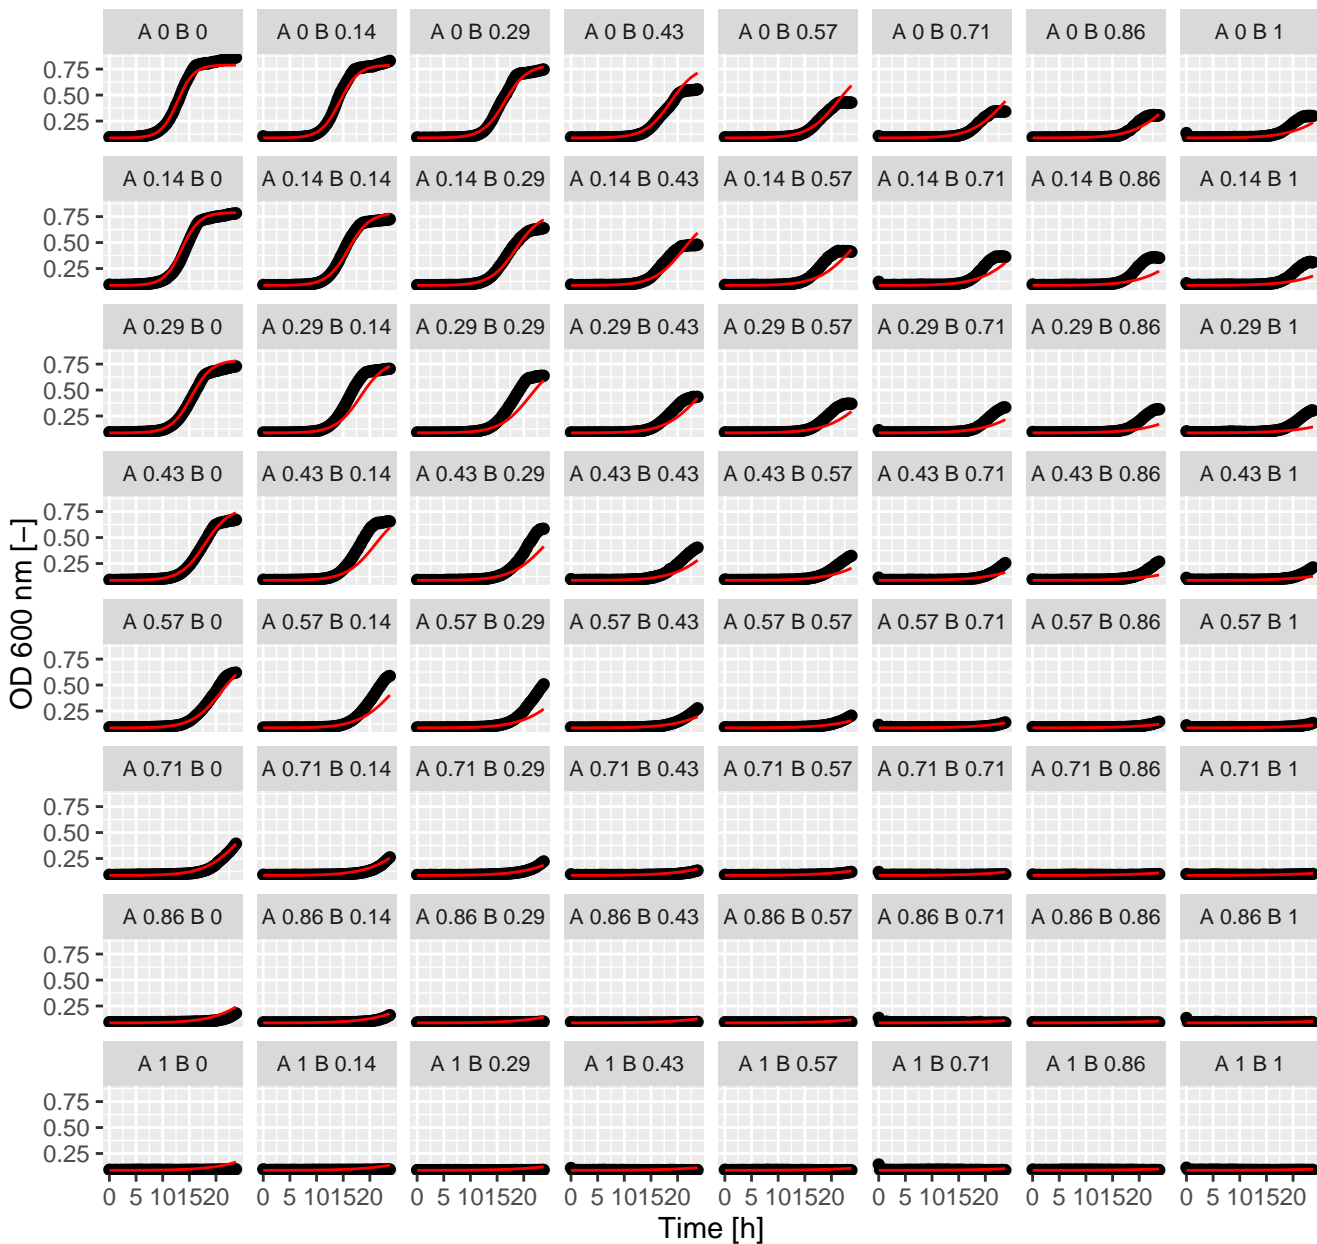

MMS.Ter (= Ax.Bx) full GPDI  
Int\_AB = 0.08 and Int\_BA = 0.45 at EC50

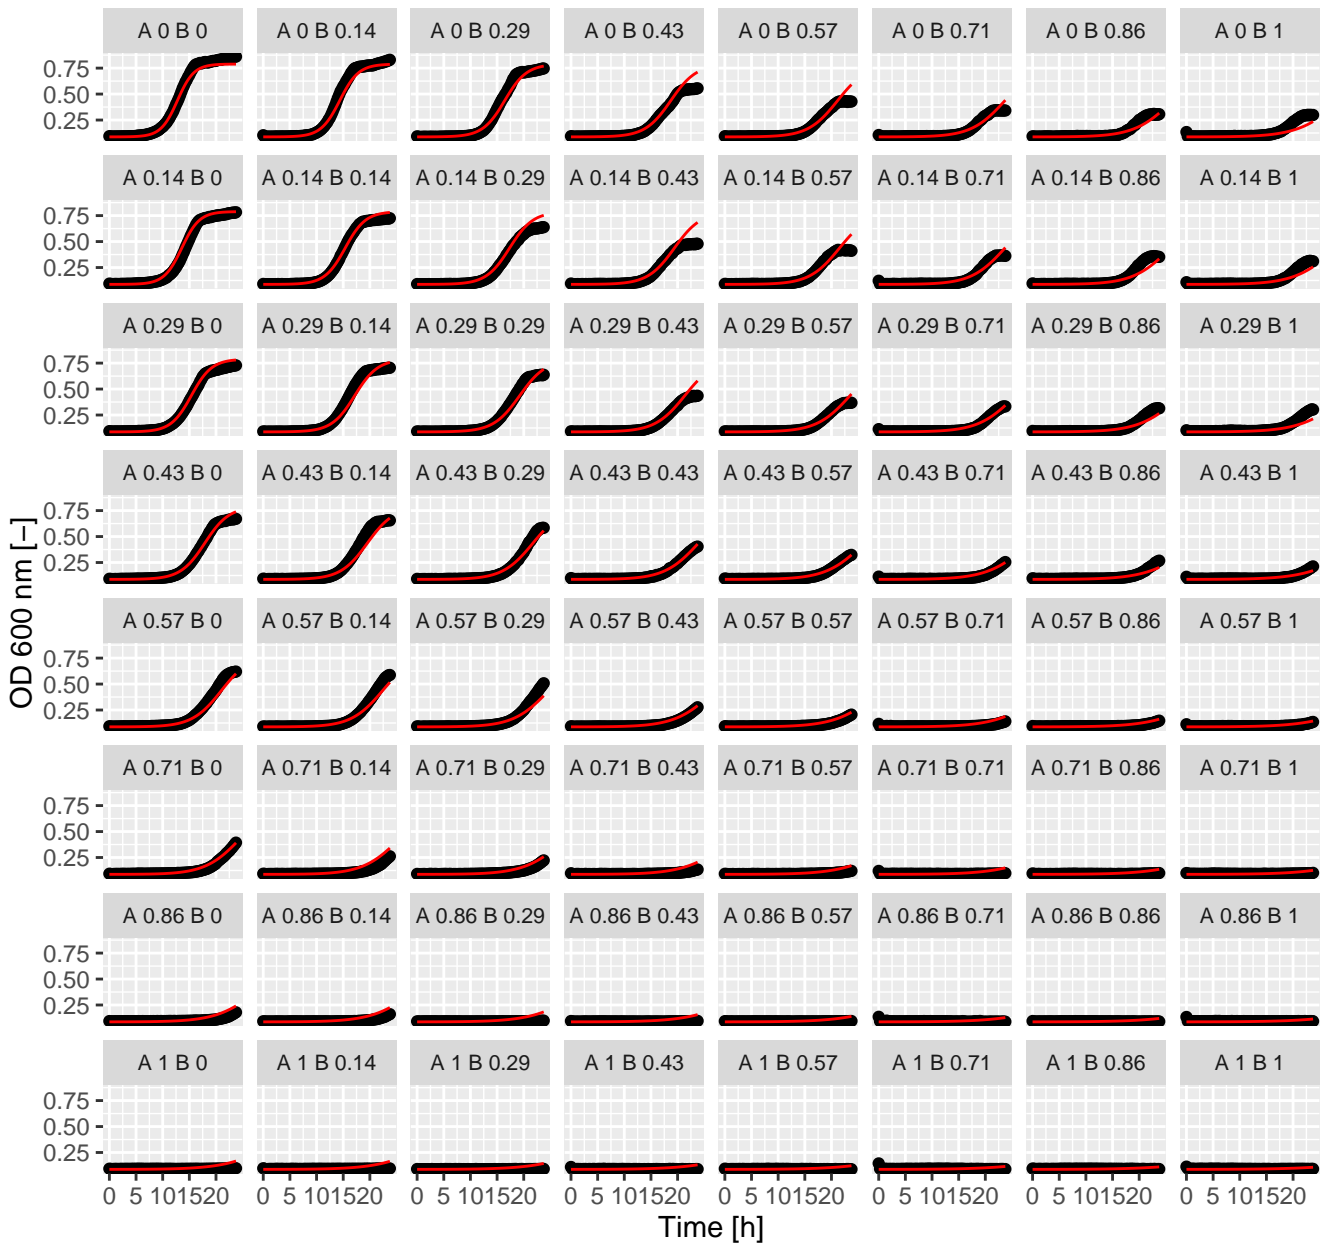

Myr.Myrr (= Ax.Bx) exp. additivity (LA)  
Int\_AB = 0 and Int\_BA = 0 at EC50

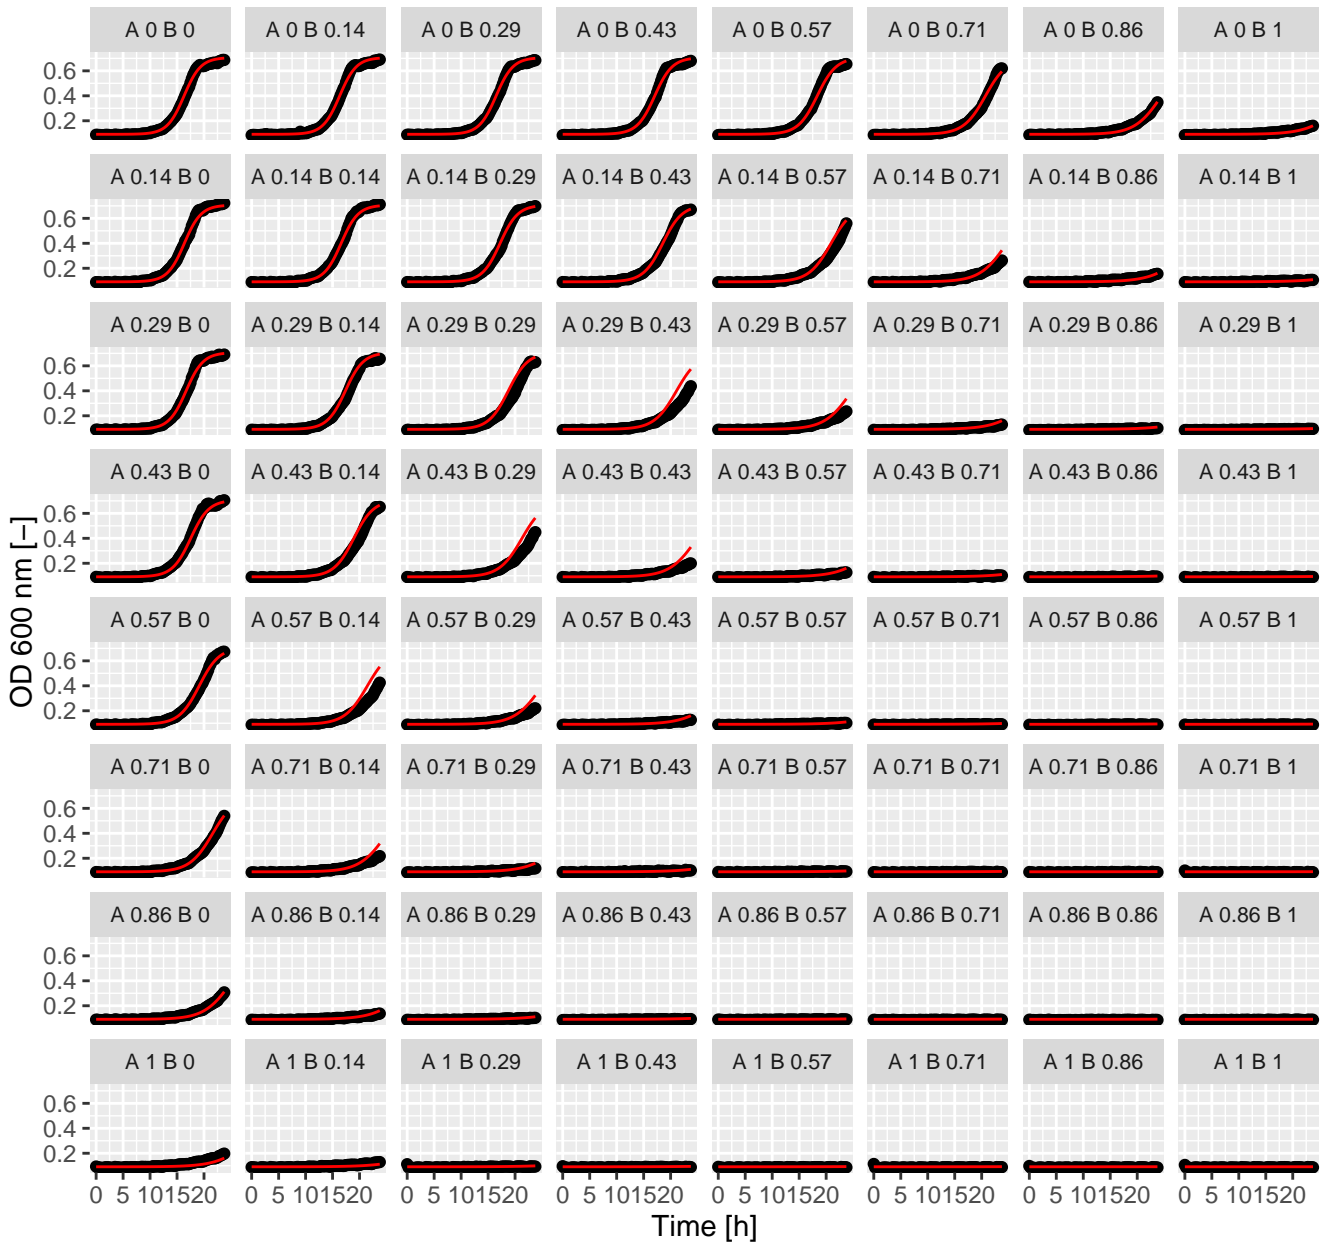

Myr.Myr (= Ax.Bx) full GPDI  
Int\_AB = -0.16 and Int\_BA = -0.05 at EC50

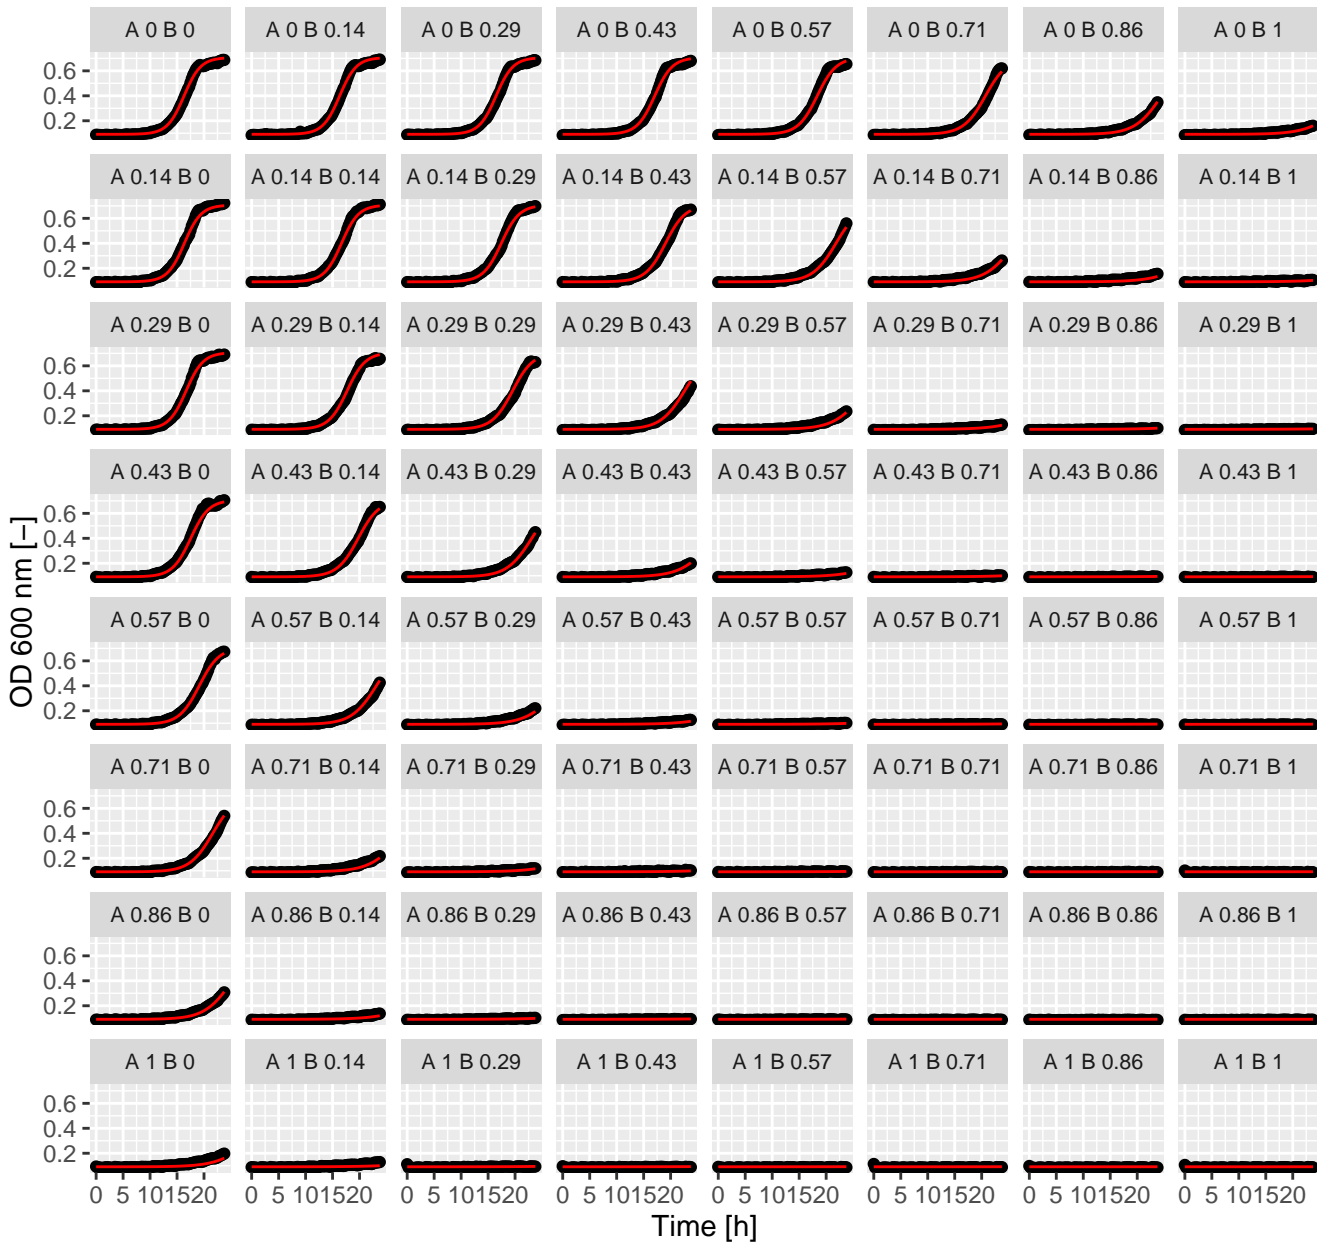

Myr.Pen (= Ax.Bx) exp. additivity (LA)  
Int\_AB = 0 and Int\_BA = 0 at EC50

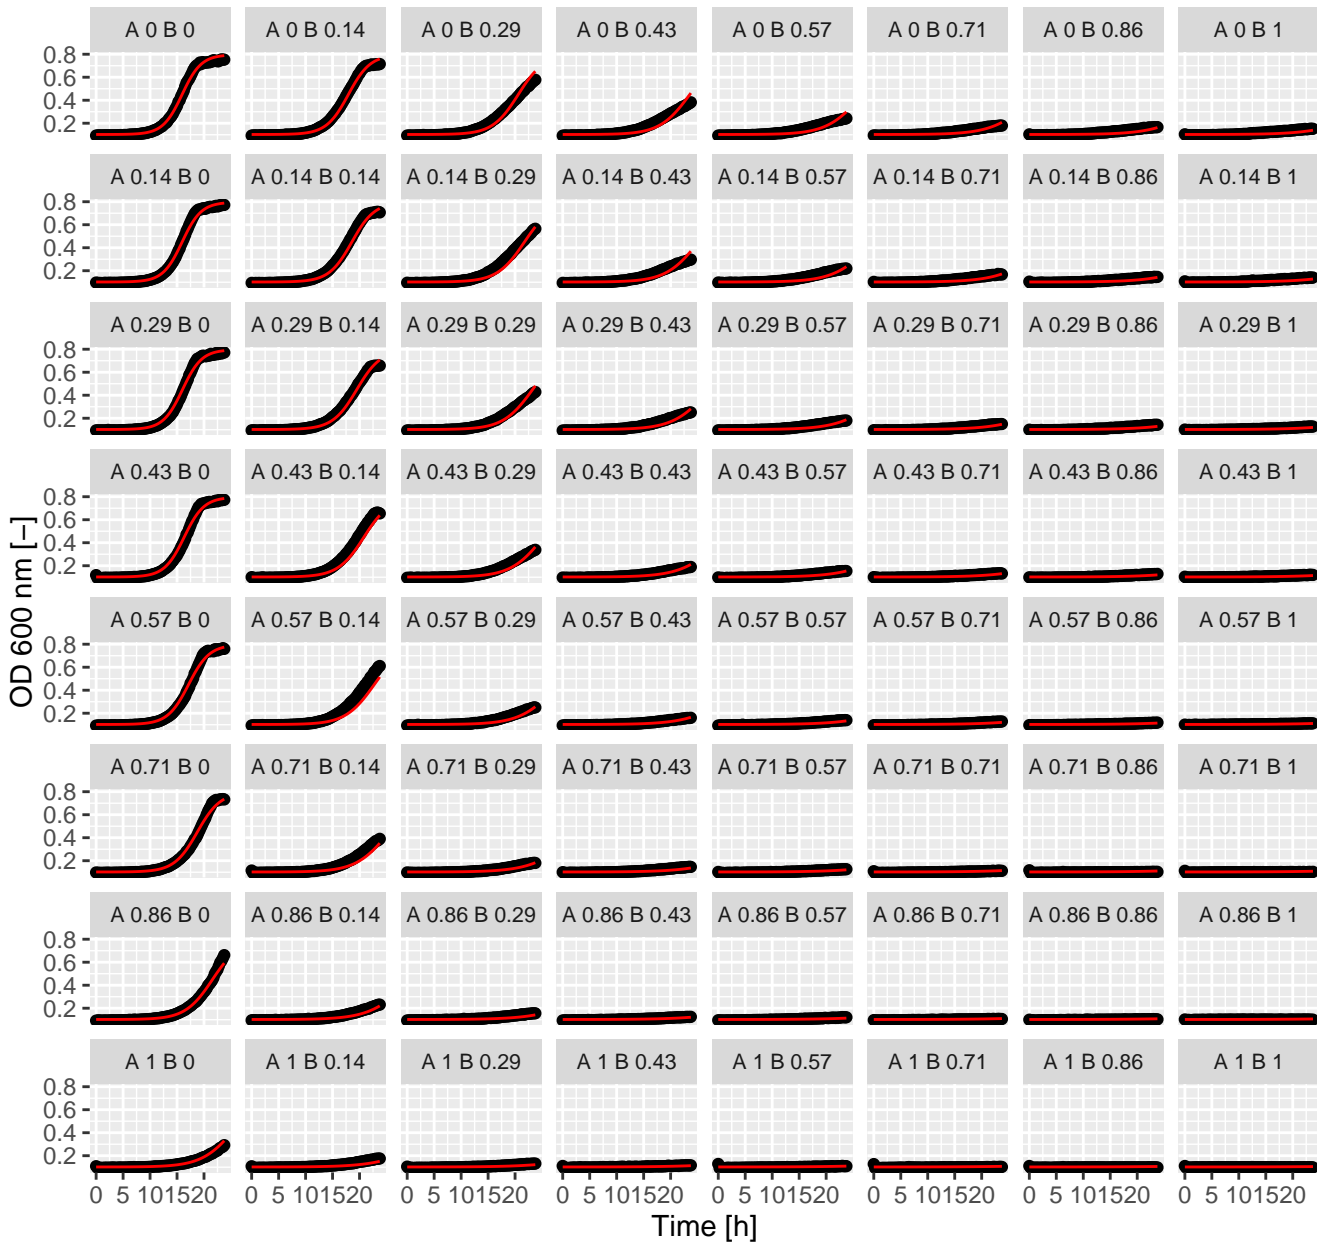

Myr.Pen (= Ax.Bx) full GPDI  
Int\_AB = 0.1 and Int\_BA = 0.04 at EC50

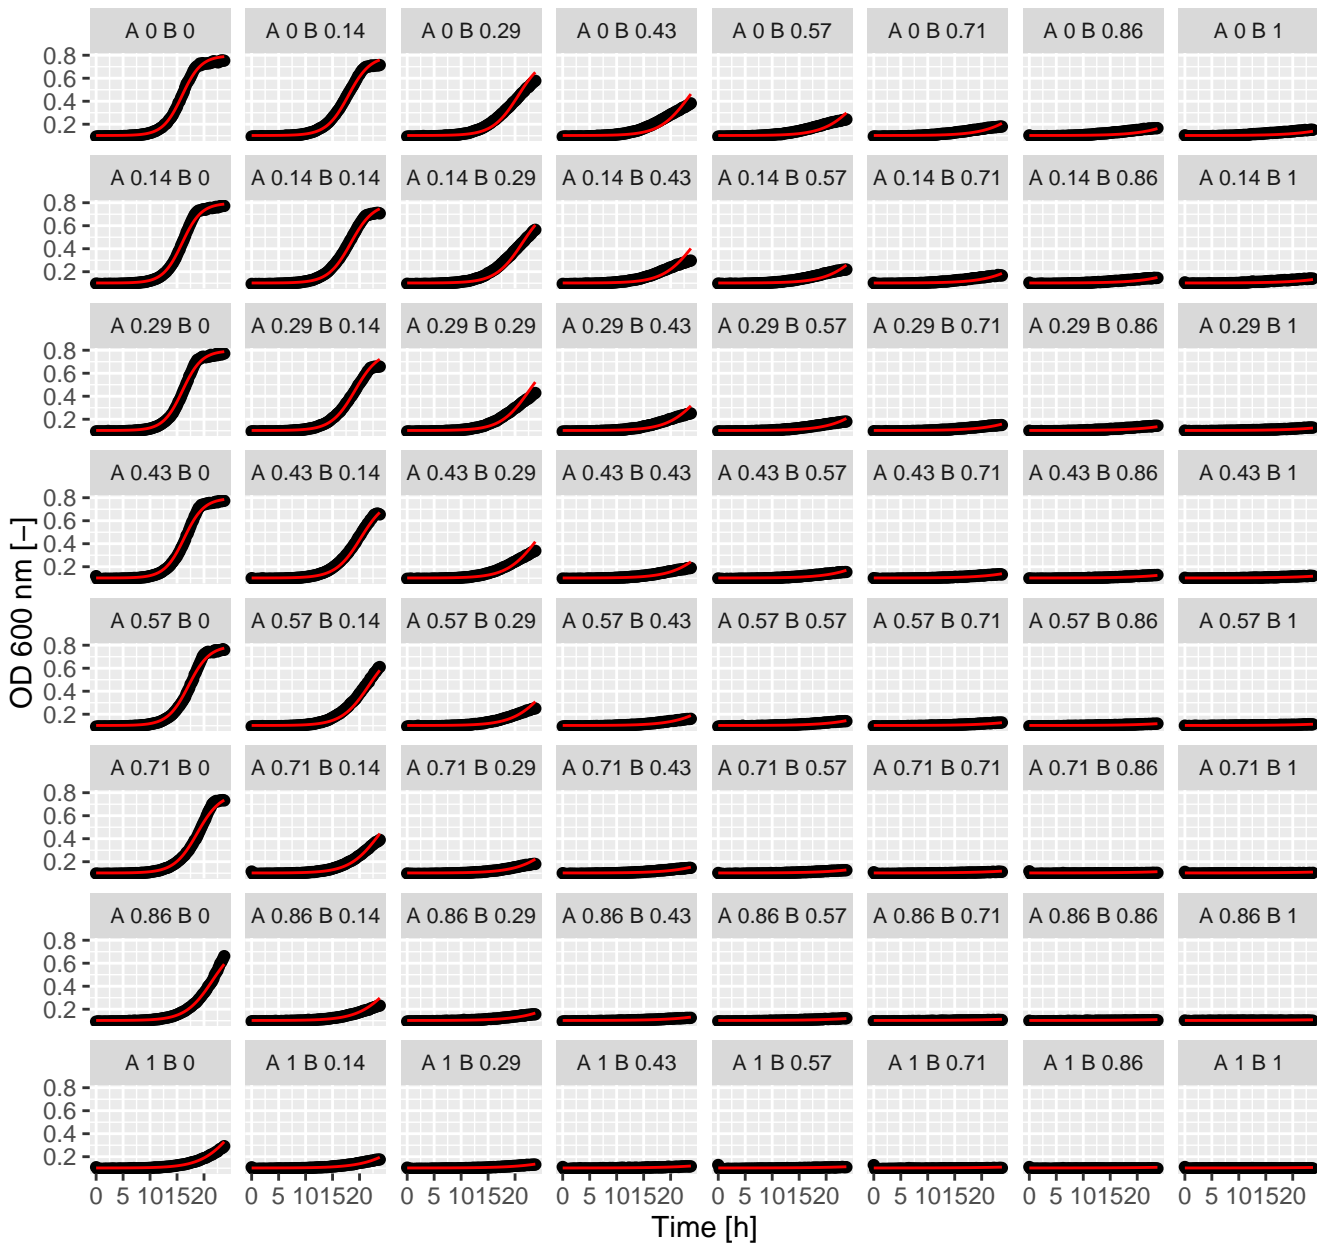



Myr.Qnn (= Ax.Bx) exp. additivity (LA)  
Int\_AB = 0 and Int\_BA = 0 at EC50

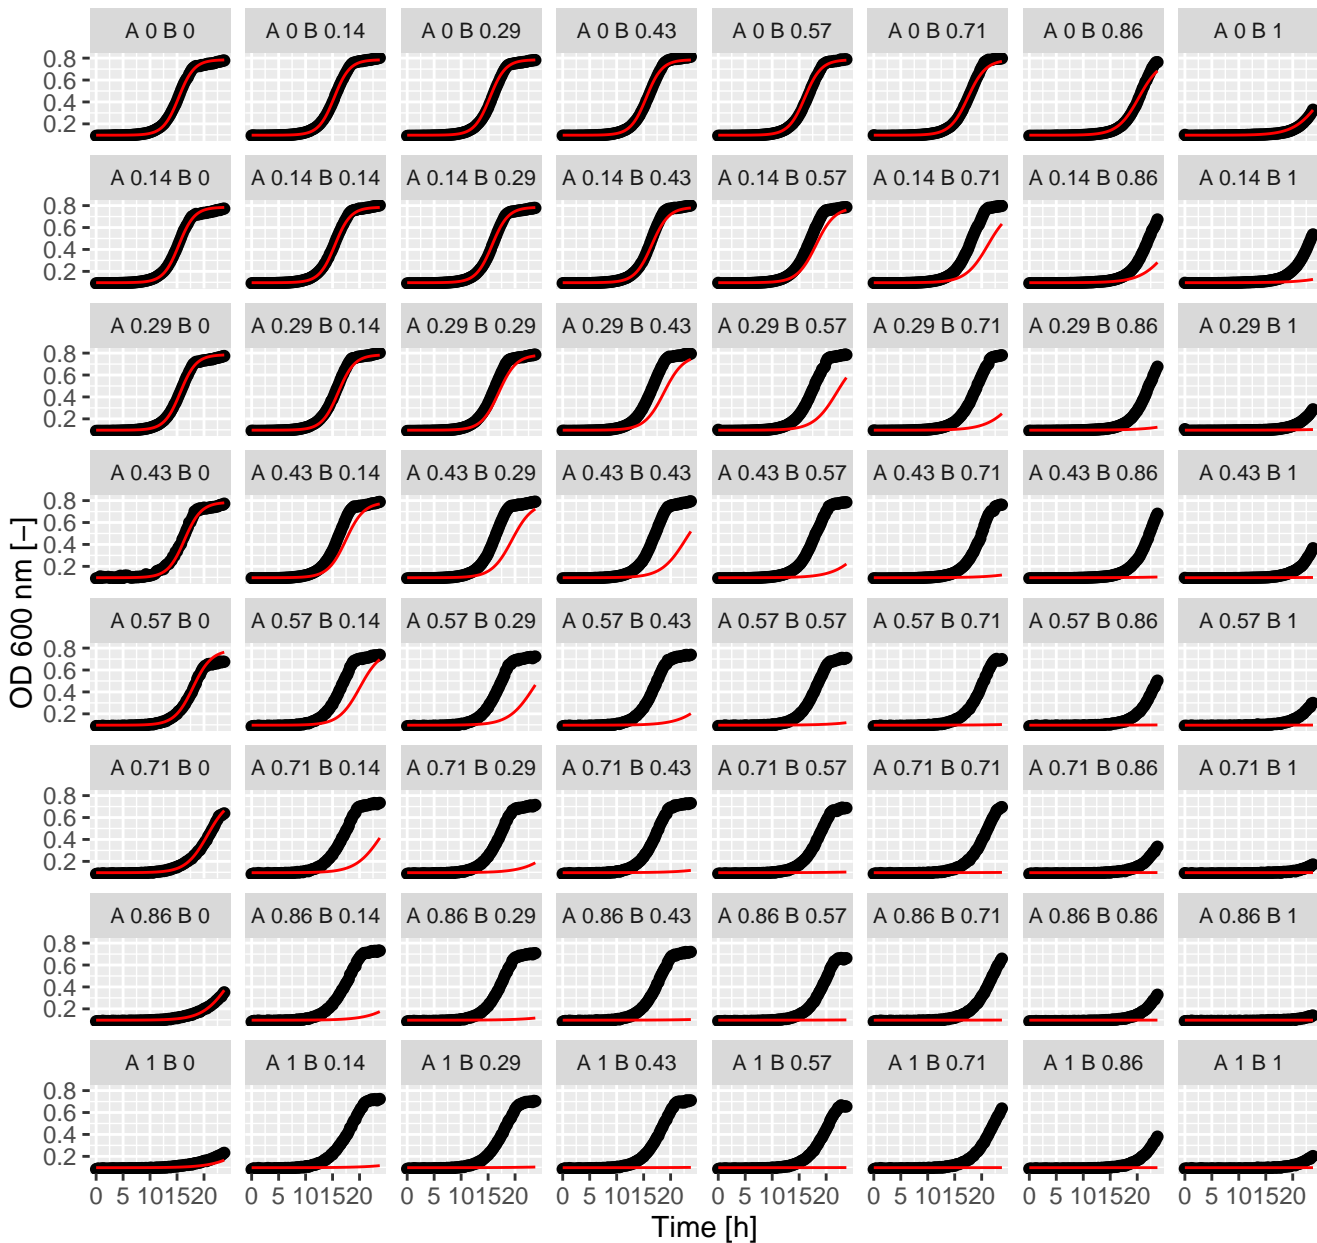

Myr.Qnn (= Ax.Bx) full GPDI  
Int\_AB = 3.11 and Int\_BA = 0.18 at EC50

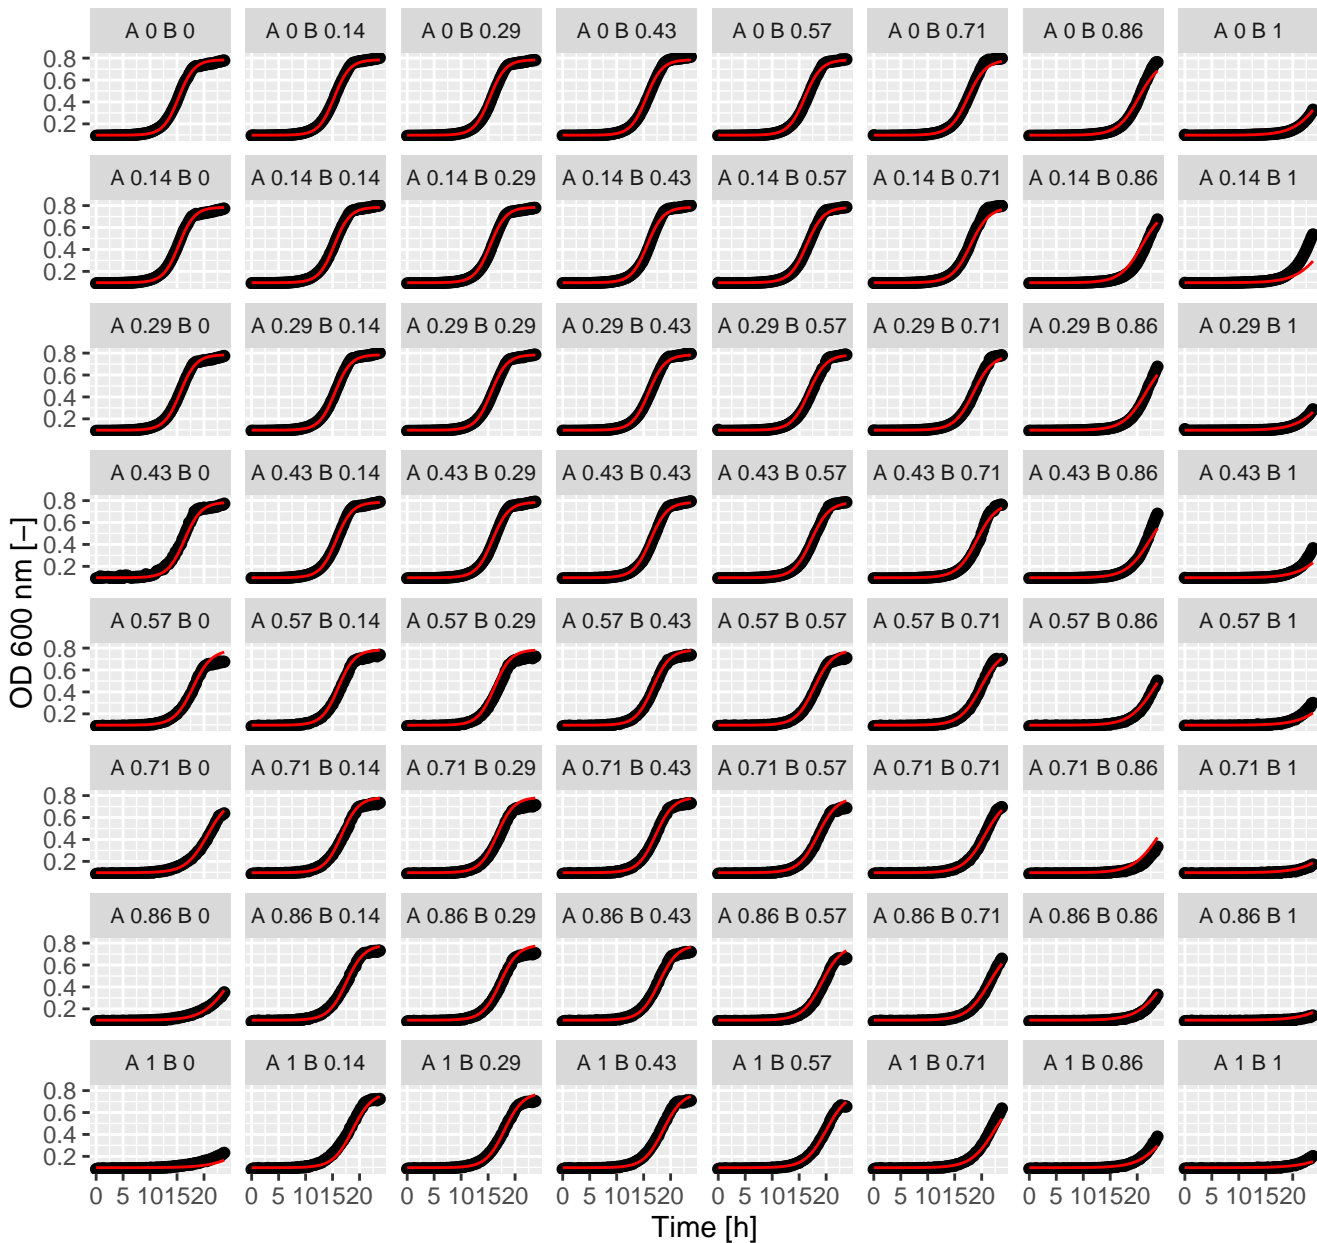

Myr.Rad (= Ax.Bx) exp. additivity (LA)  
Int\_AB = 0 and Int\_BA = 0 at EC50

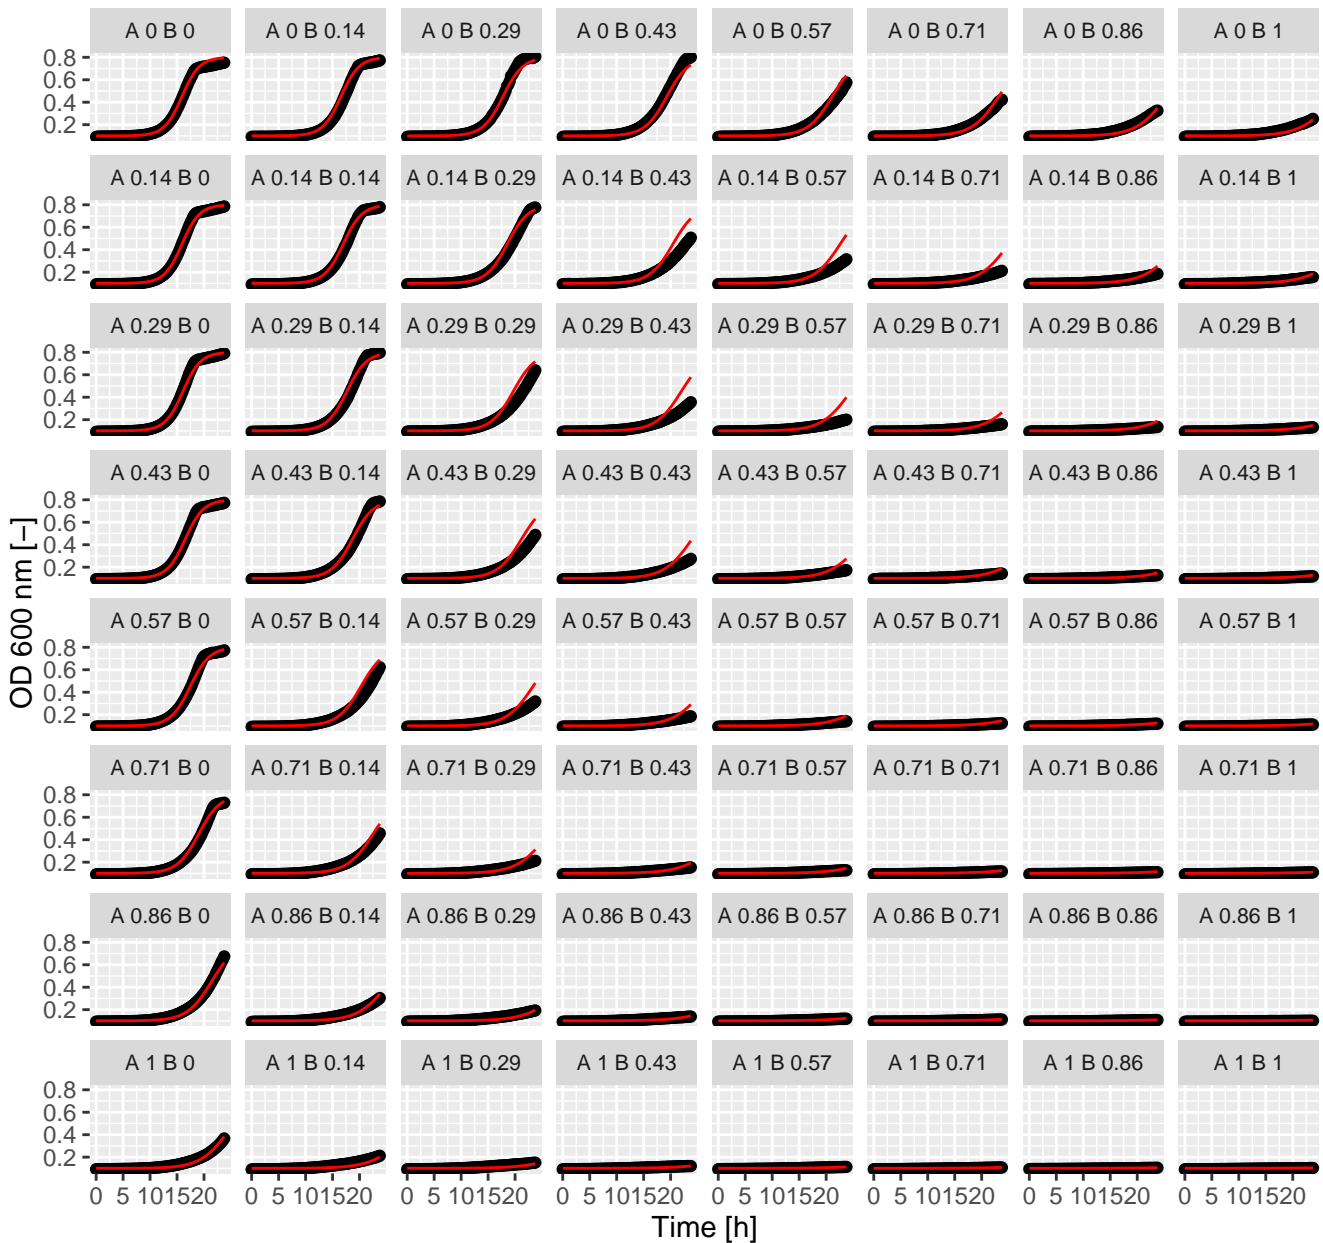

Myr.Rad (= Ax.Bx) full GPDI  
Int\_AB = 0.9 and Int\_BA = -0.39 at EC50

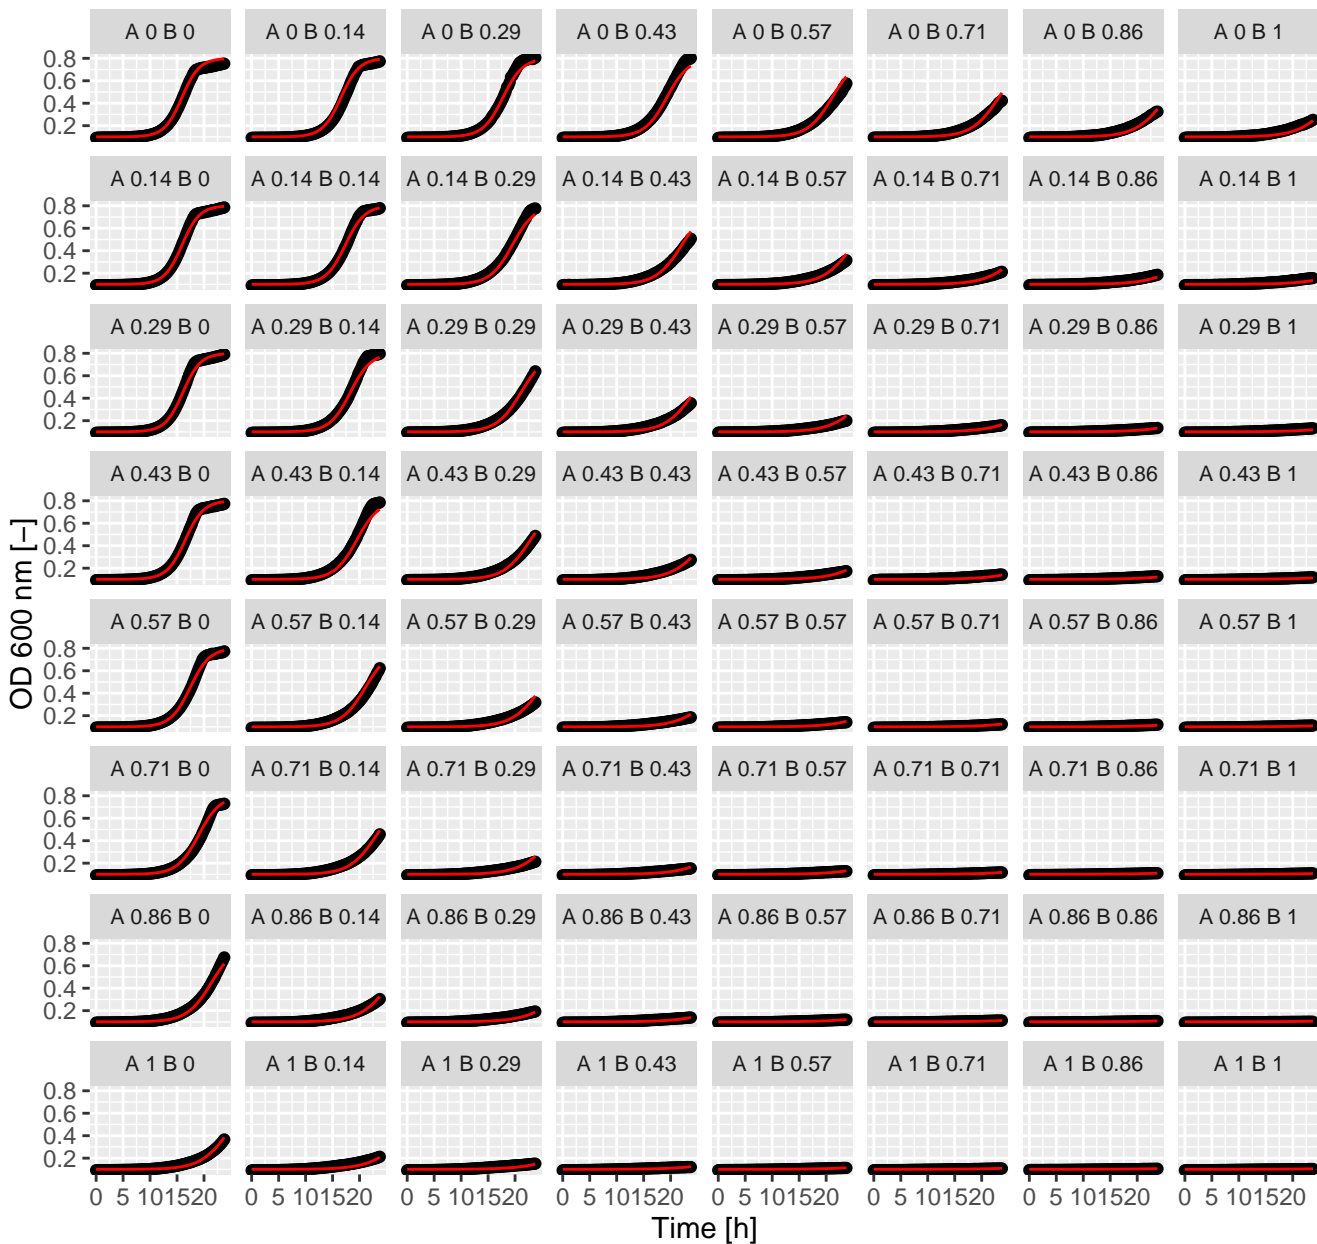

Myr.Sta (= Ax.Bx) exp. additivity (LA)  
Int\_AB = 0 and Int\_BA = 0 at EC50

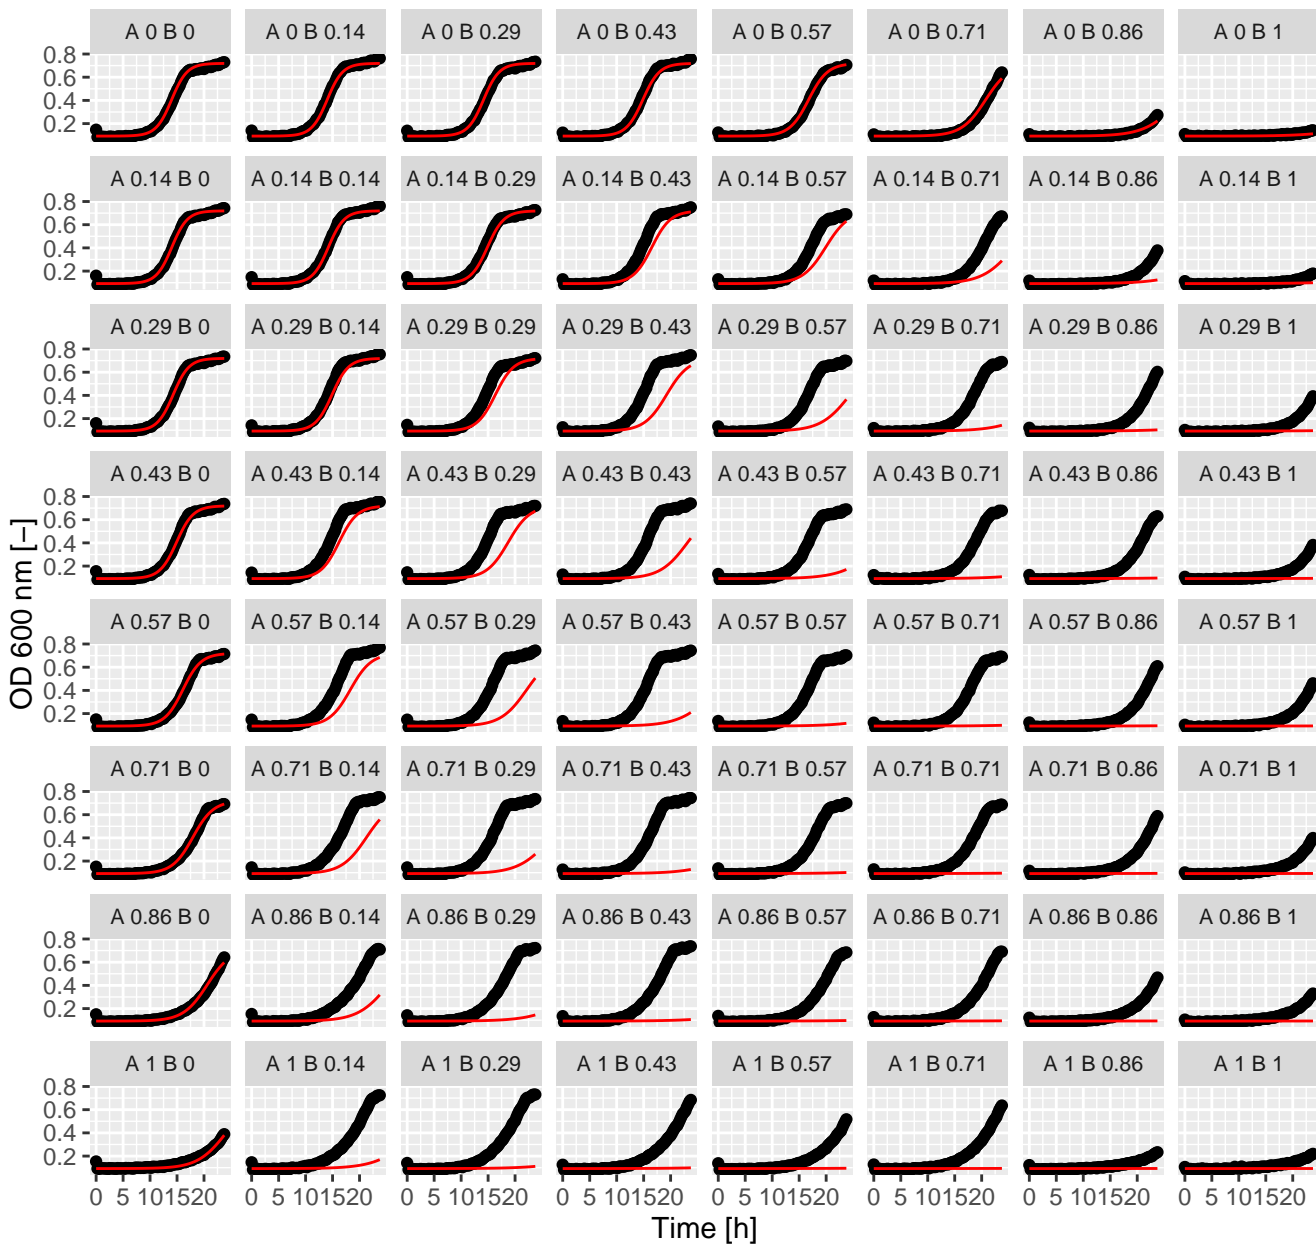

Myr.Sta (= Ax.Bx) full GPDI  
Int\_AB = 1.14 and Int\_BA = 1.14 at EC50

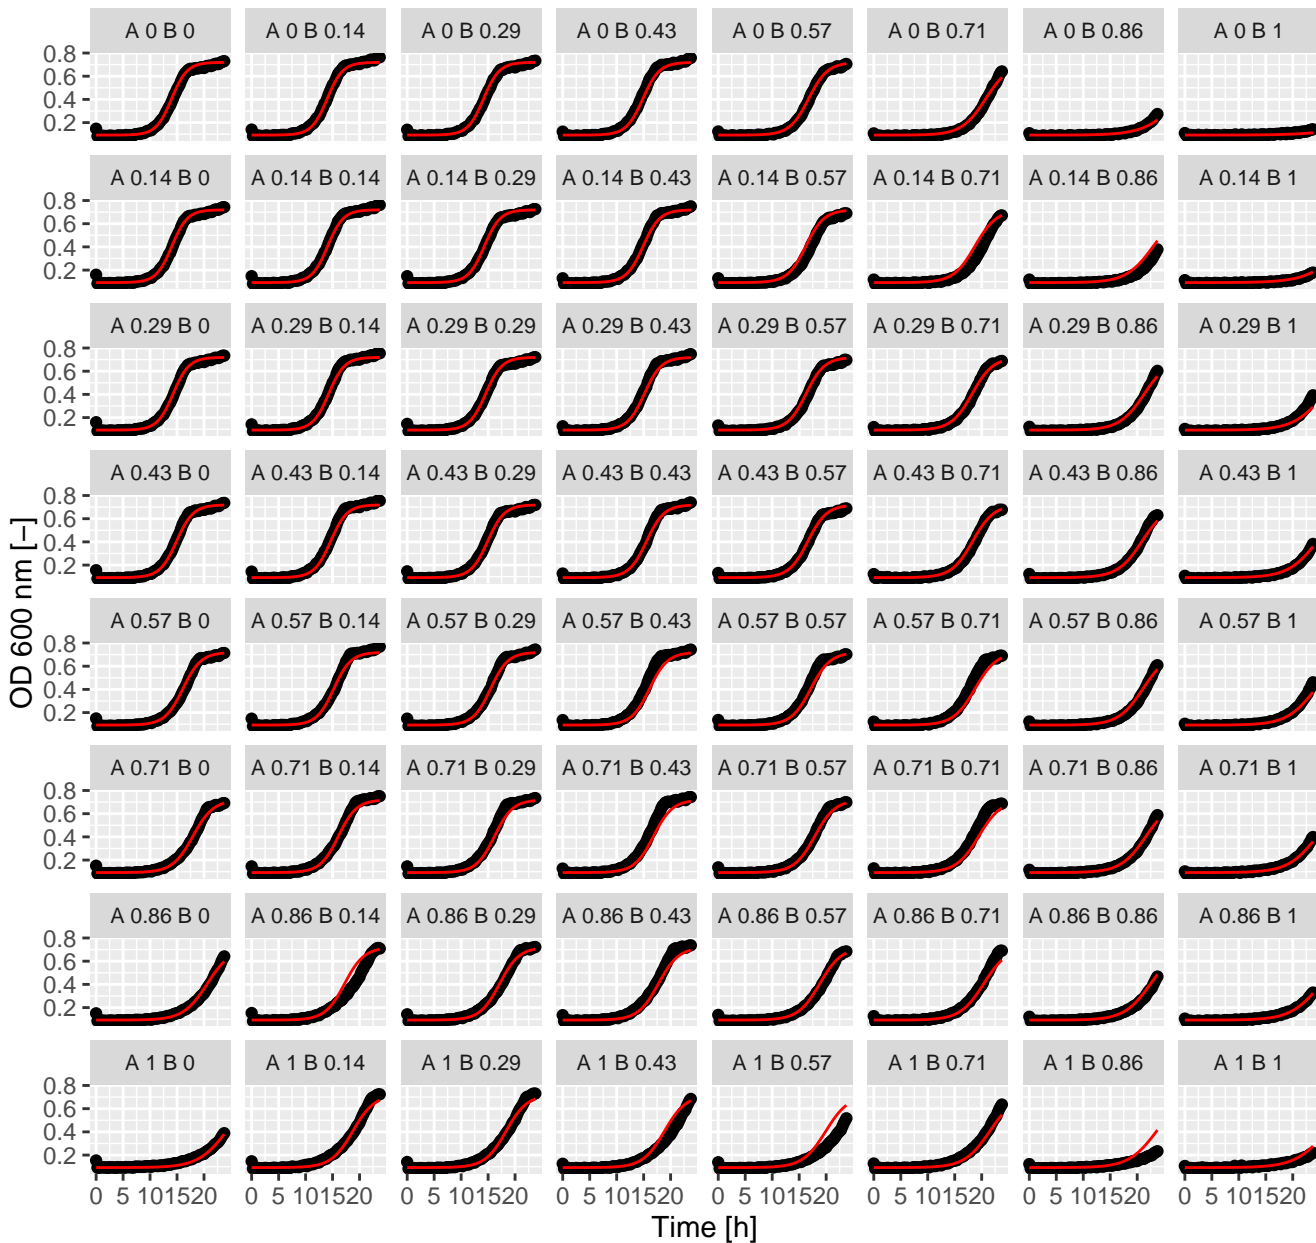

Myr.Tac (= Ax.Bx) exp. additivity (LA)  
Int\_AB = 0 and Int\_BA = 0 at EC50

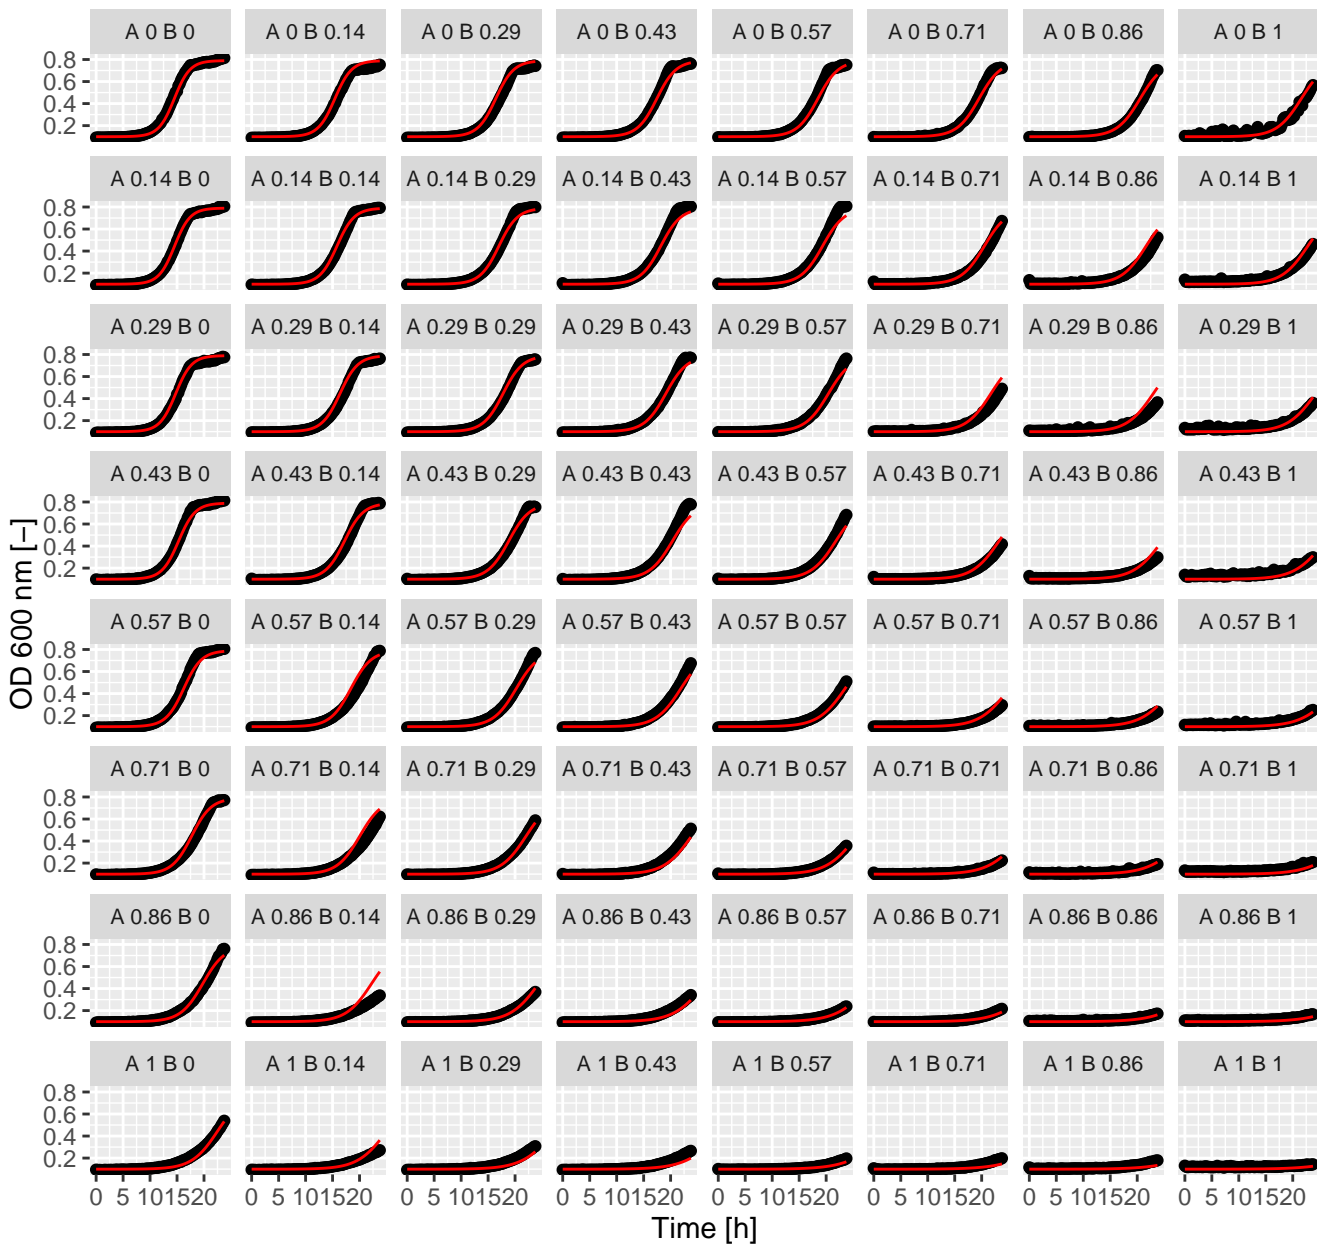

Myr.Tac (= Ax.Bx) full GPDI  
Int\_AB = 0.91 and Int\_BA = -0.36 at EC50

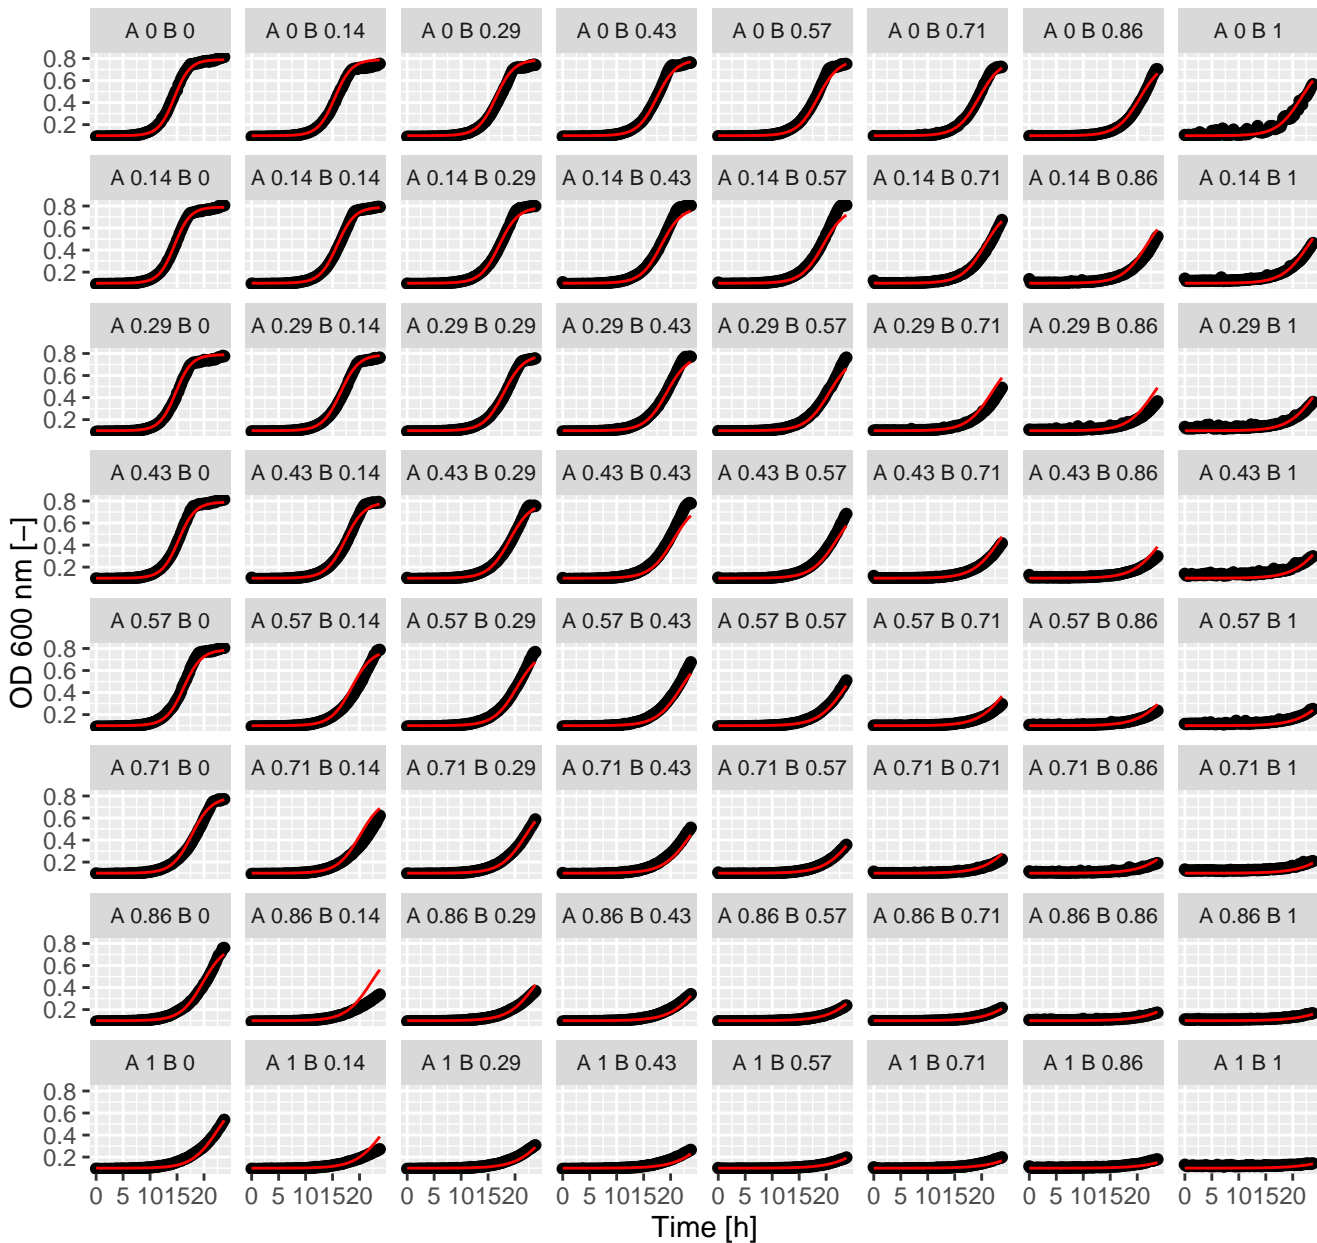



Myr.Ter (= Ax.Bx) exp. additivity (LA)  
Int\_AB = 0 and Int\_BA = 0 at EC50

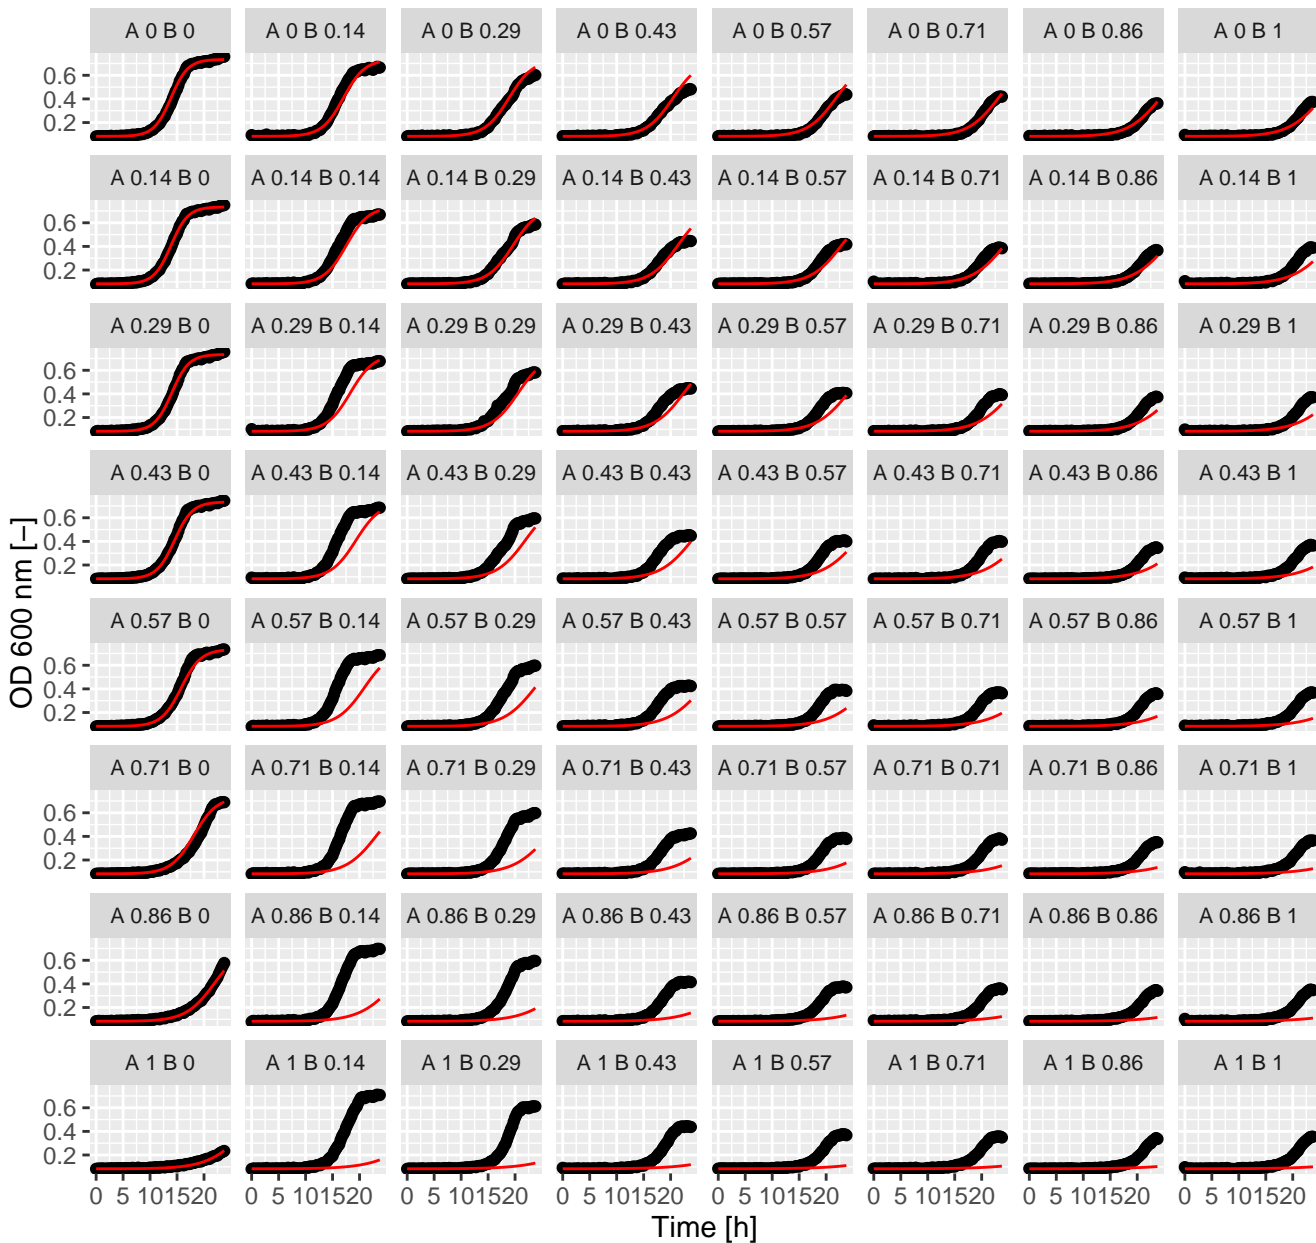

Myr.Ter (= Ax.Bx) full GPDI  
Int\_AB = 4.5 and Int\_BA = 0.16 at EC50

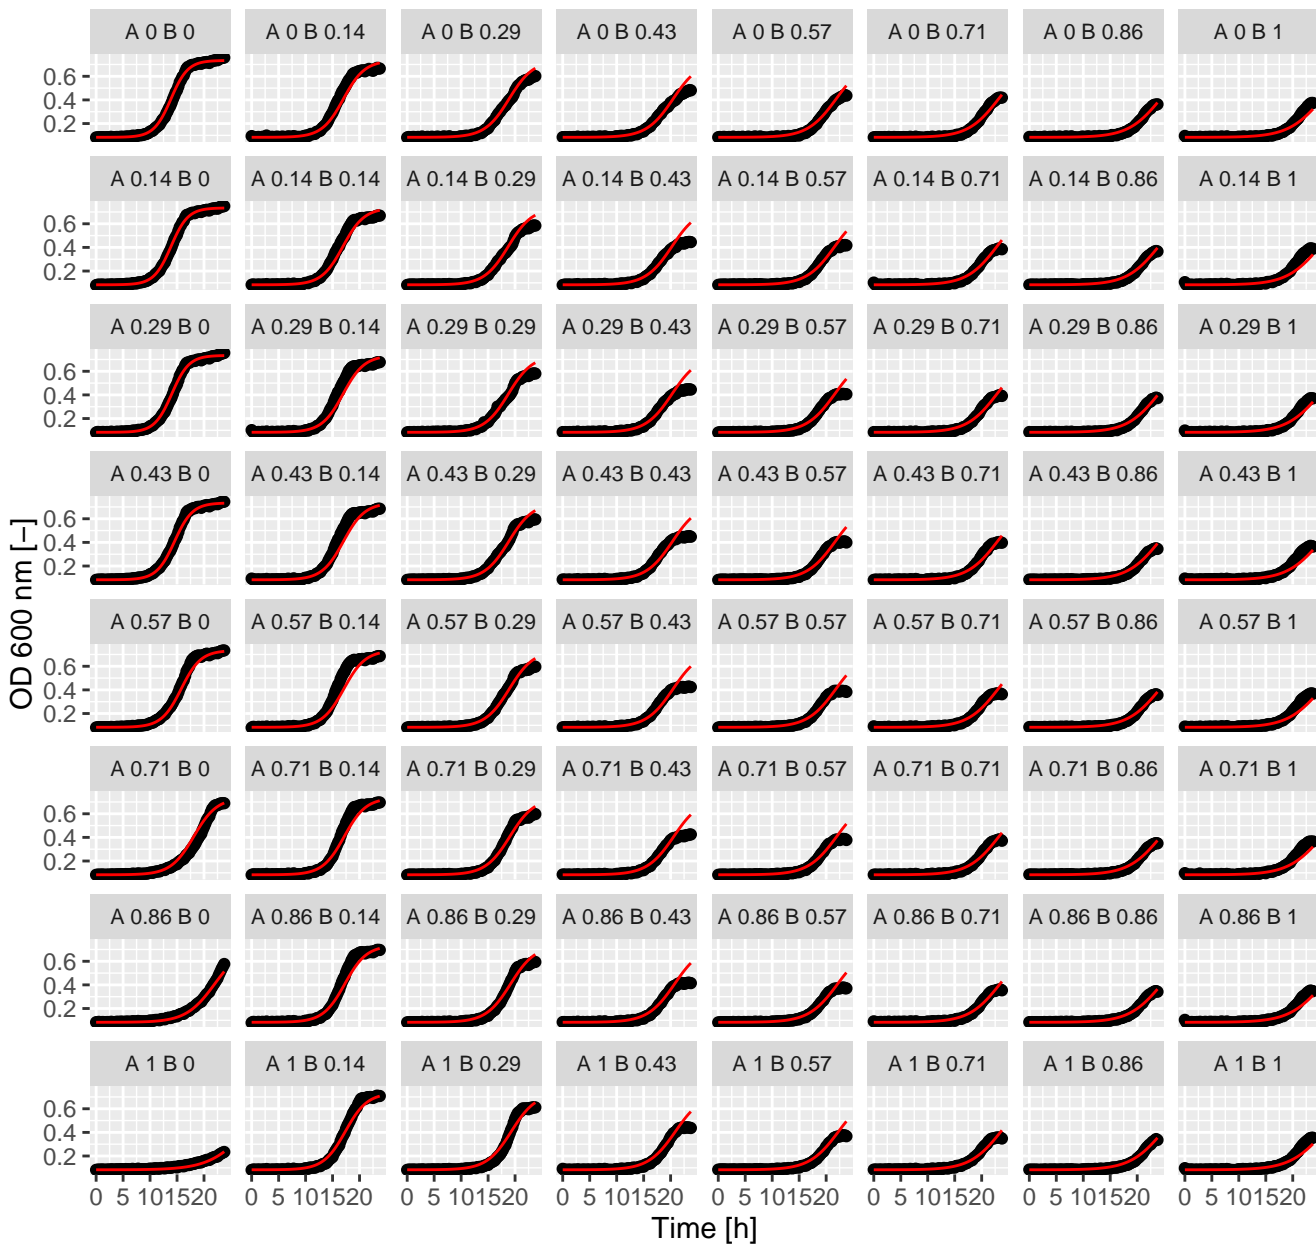

Pen.Qmy (= Ax.Bx) exp. additivity (LA)  
Int\_AB = 0 and Int\_BA = 0 at EC50

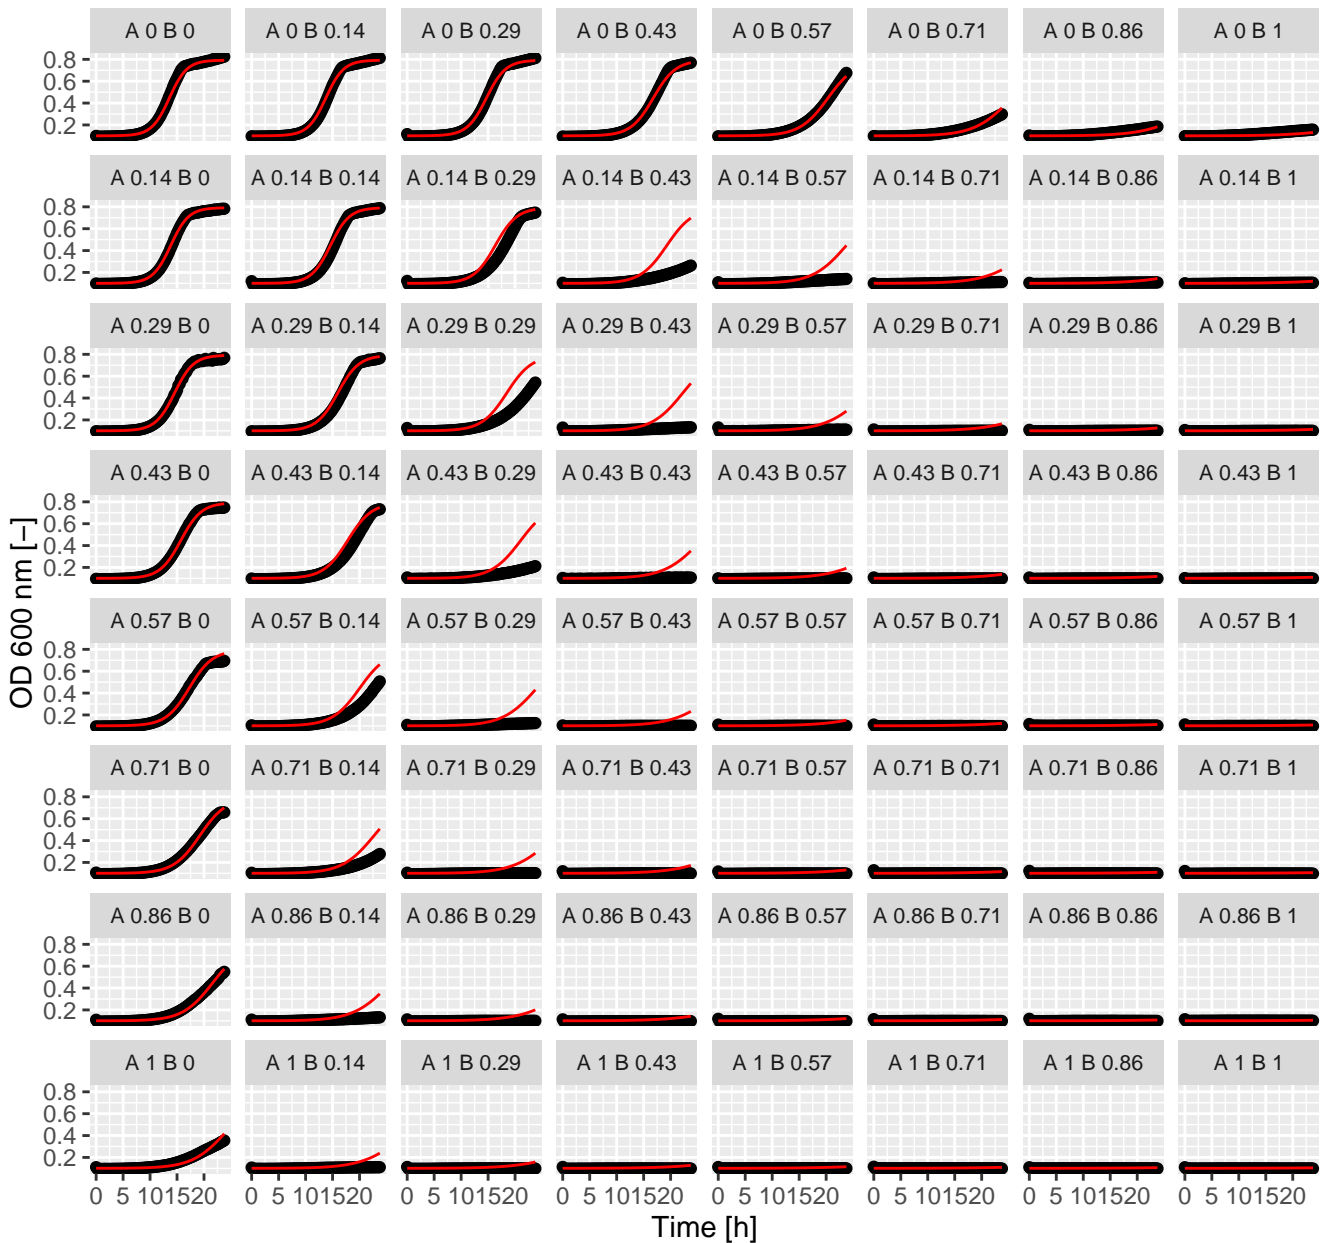

Pen.Qmy (= Ax.Bx) full GPDI  
Int\_AB = 4.97 and Int\_BA = -0.78 at EC50

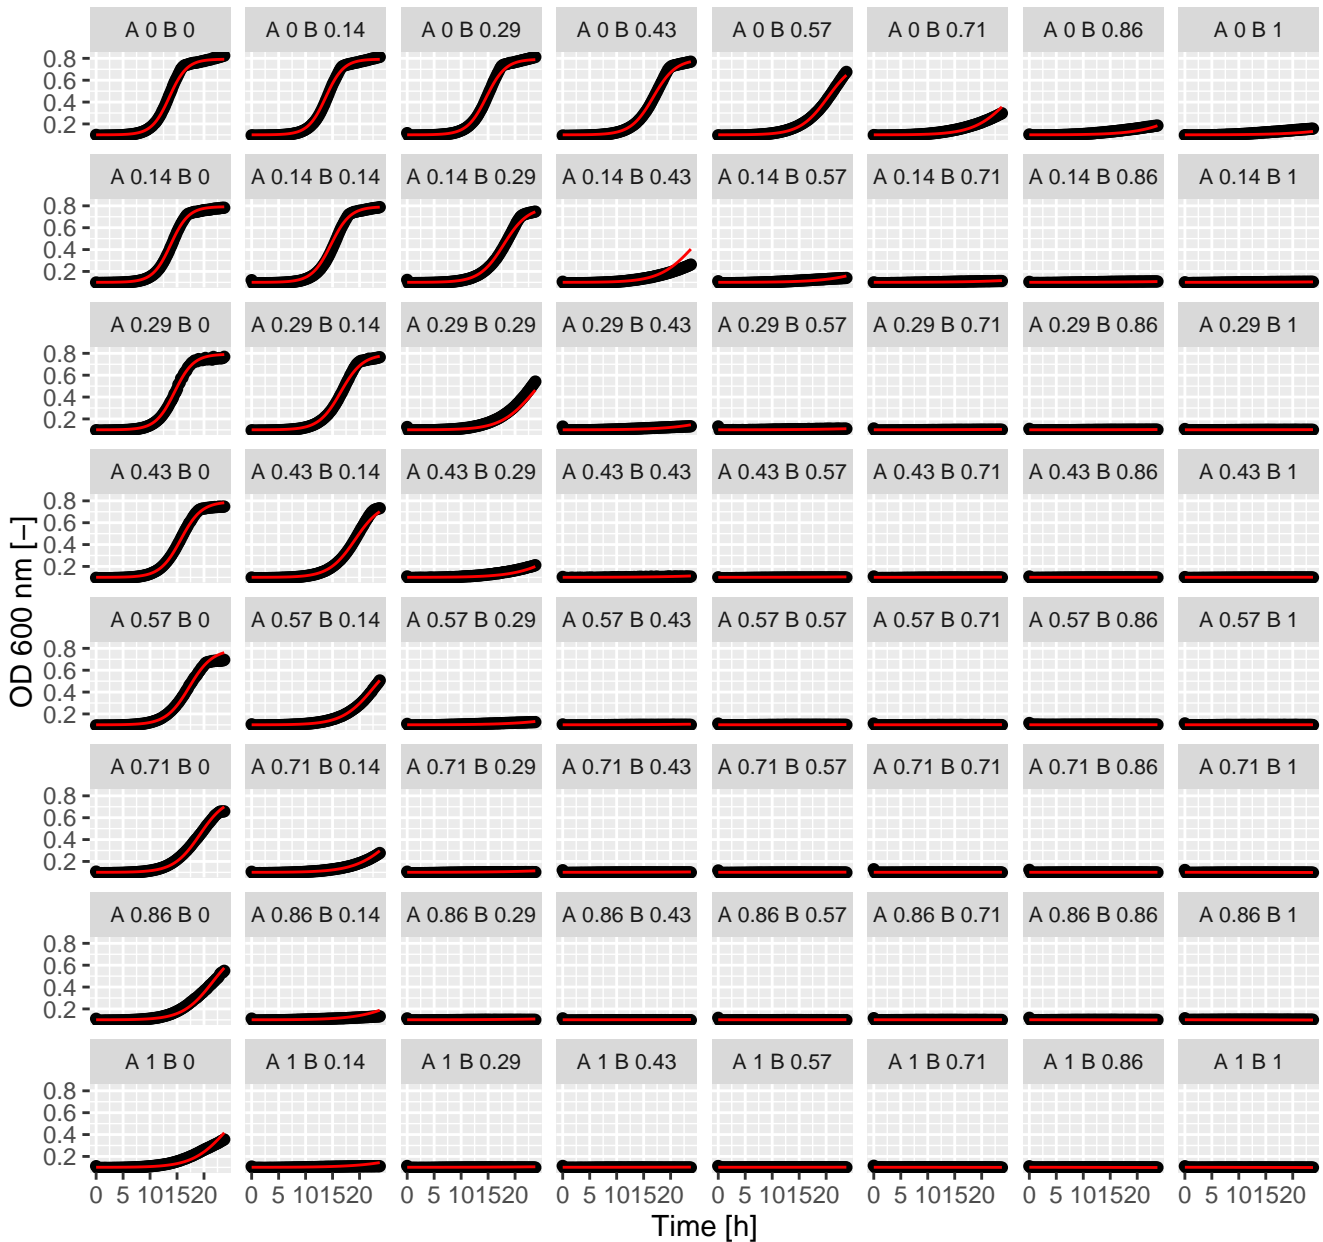

Pen.Rad (= Ax.Bx) exp. additivity (LA)  
Int\_AB = 0 and Int\_BA = 0 at EC50

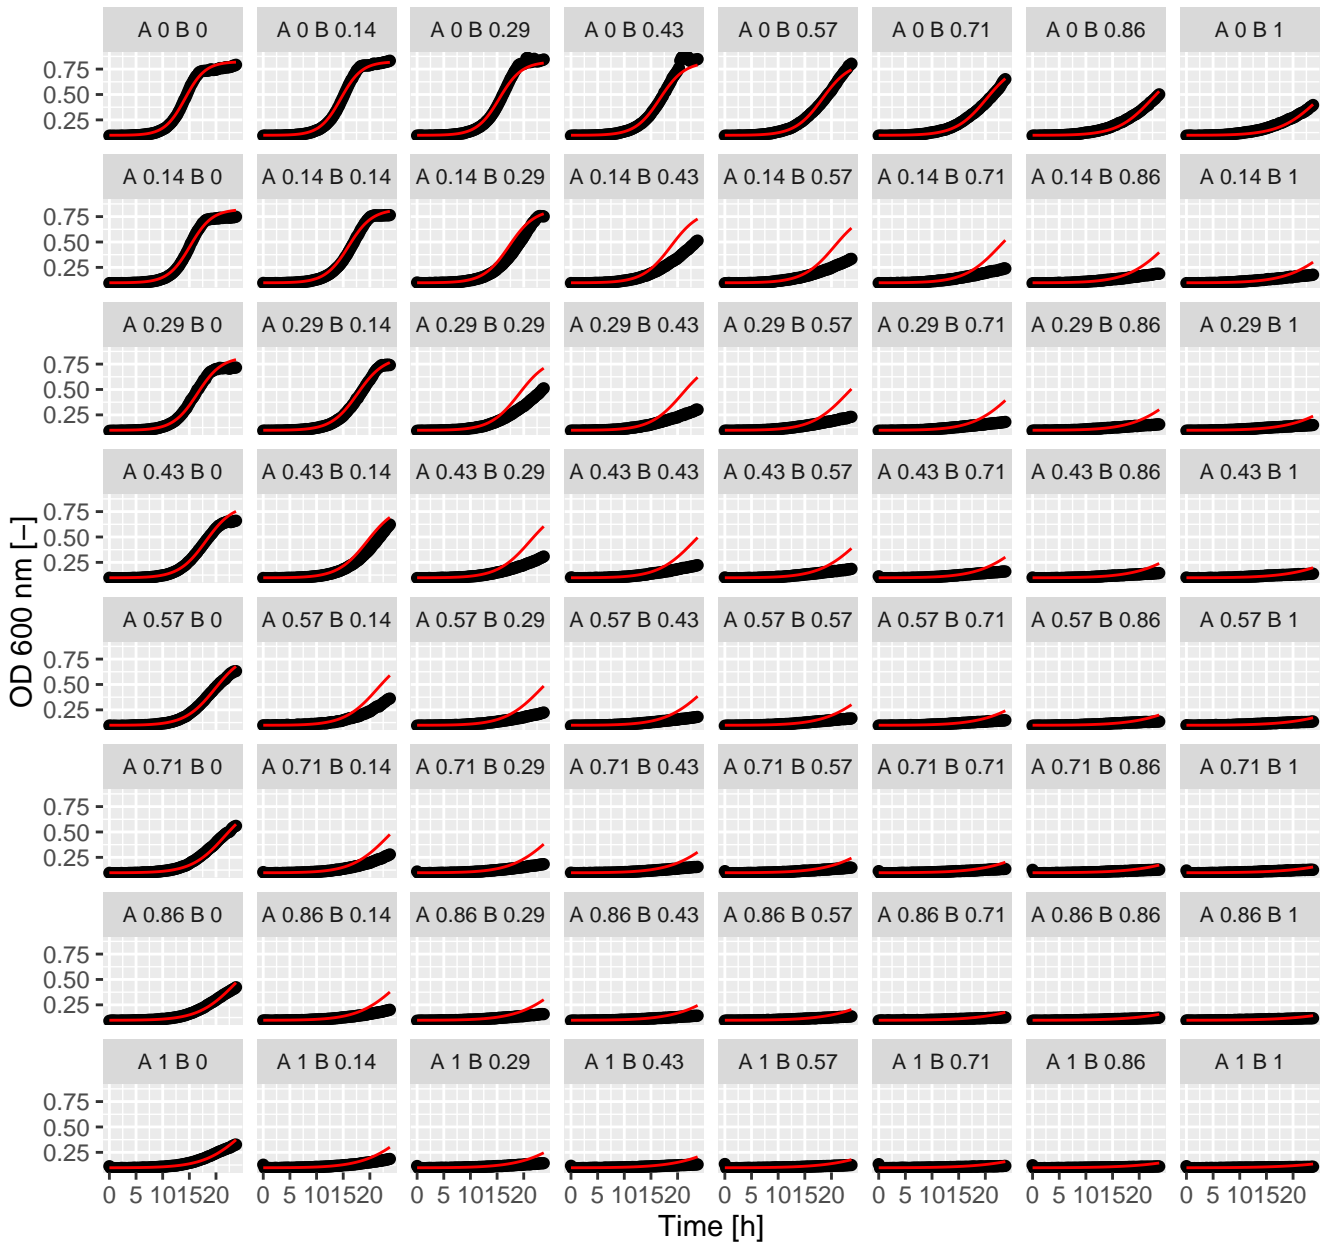

Pen.Rad (= Ax.Bx) full GPDI  
Int\_AB = -0.52 and Int\_BA = -0.21 at EC50

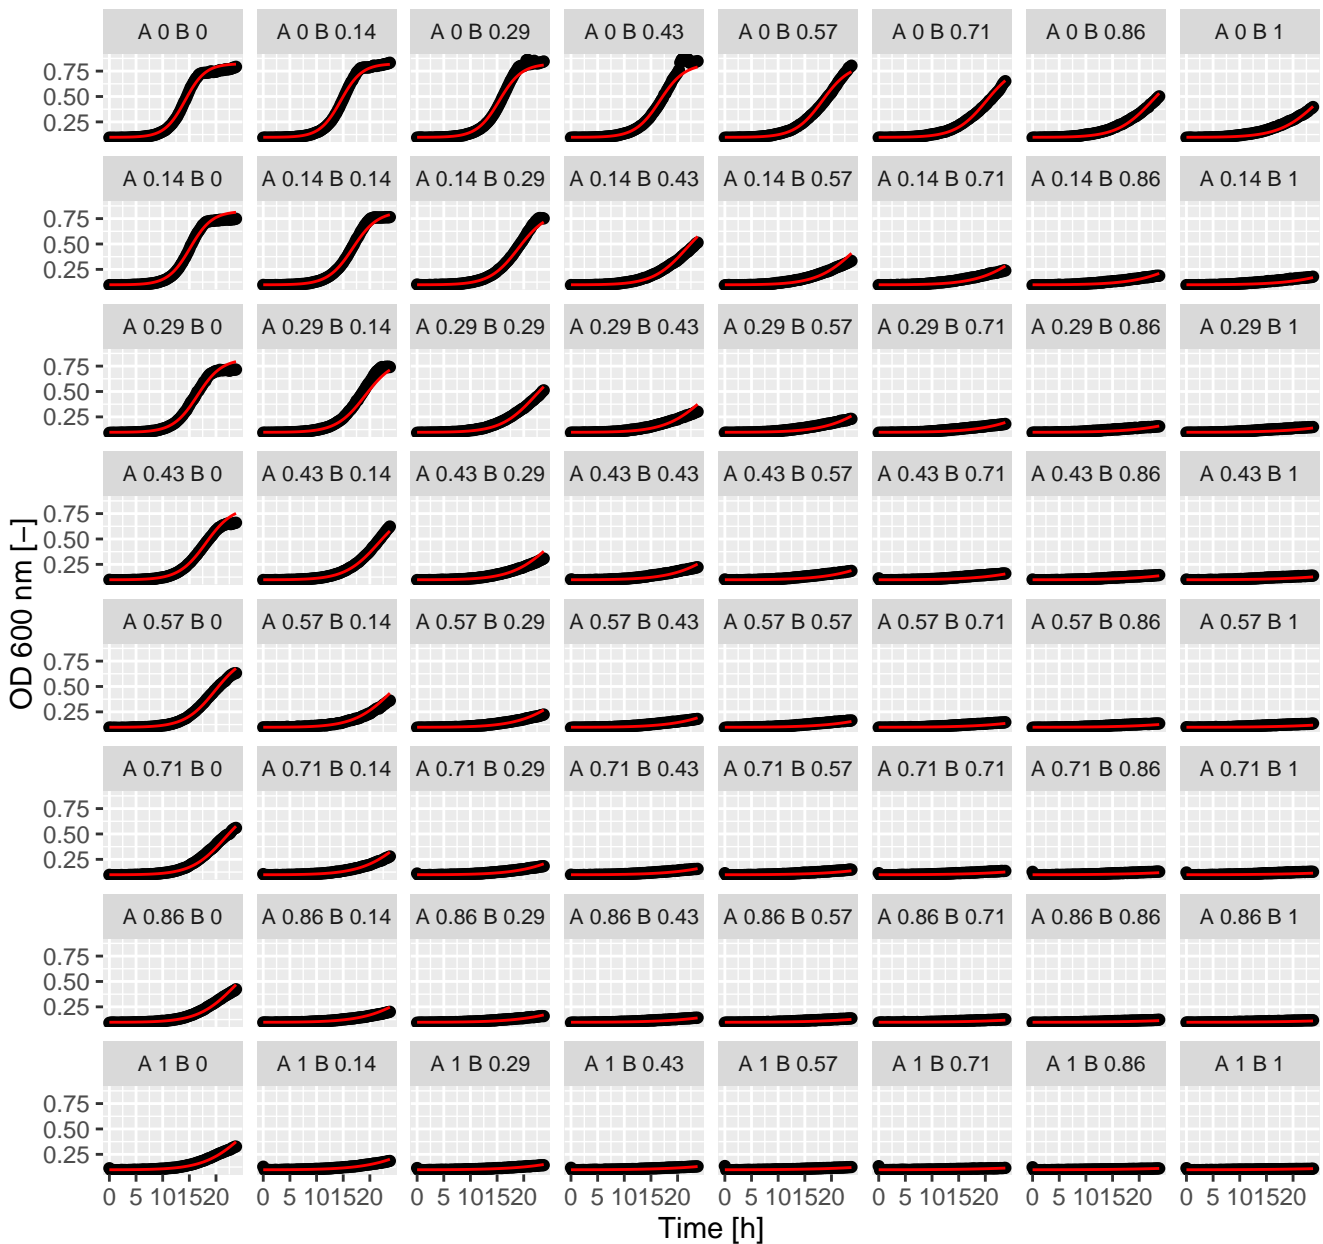

Pen.Rap (= Ax.Bx) exp. additivity (LA)  
Int\_AB = 0 and Int\_BA = 0 at EC50

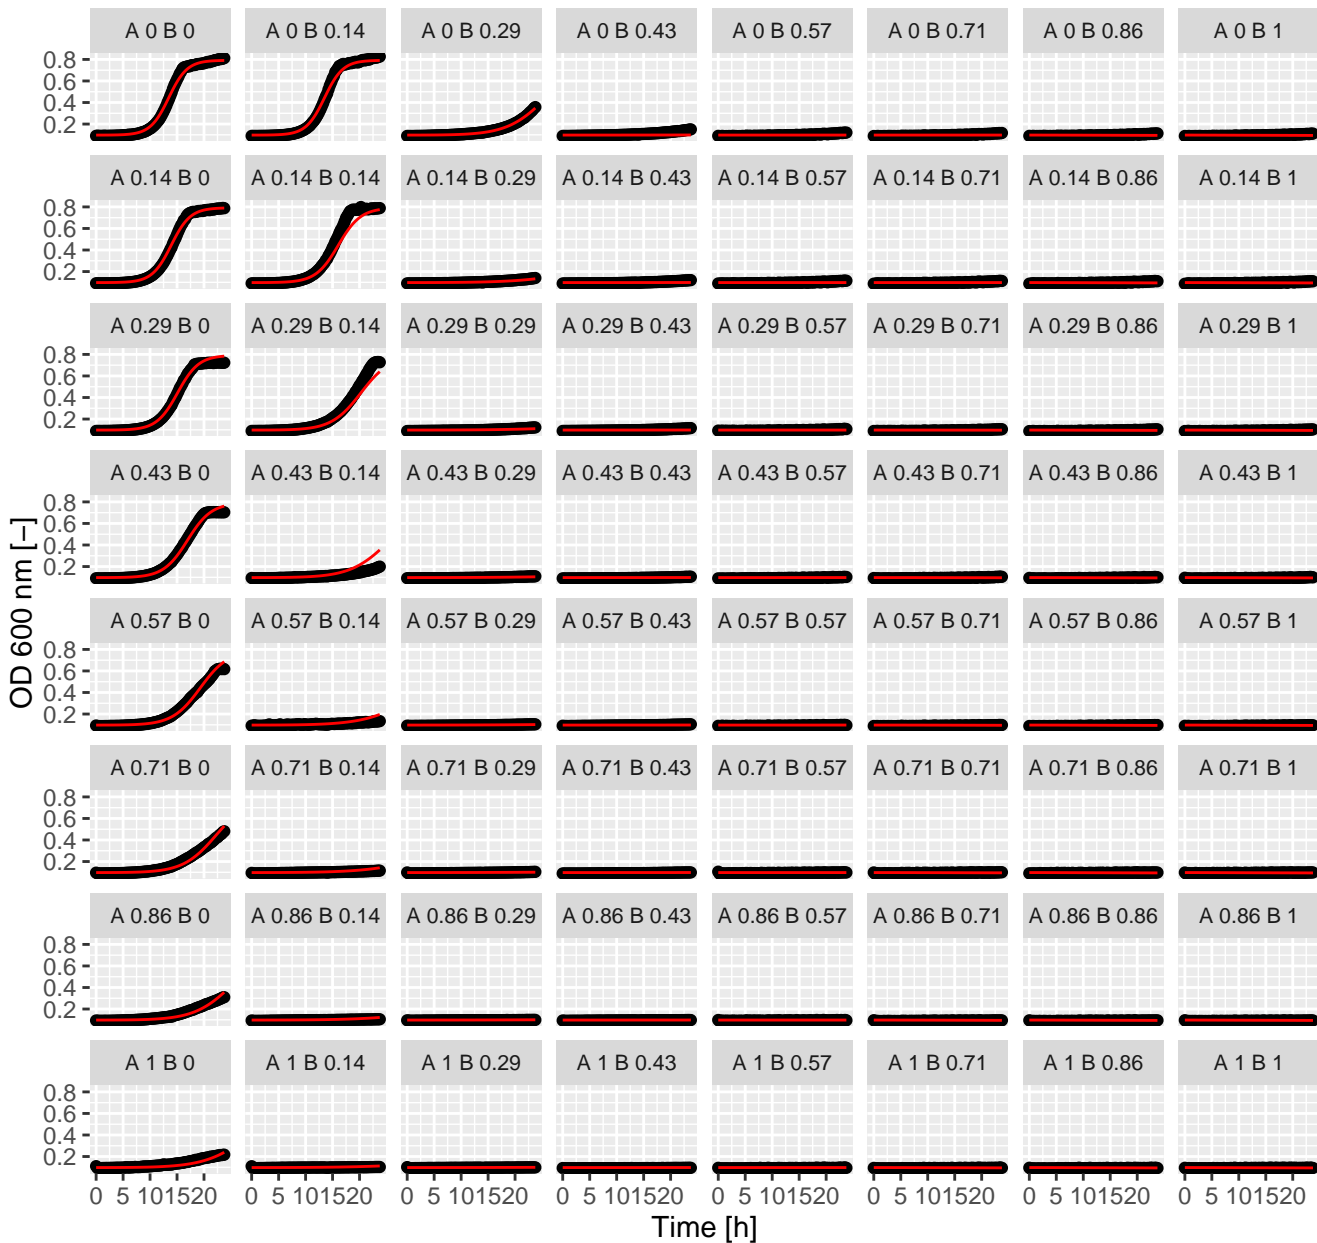

Pen.Rap (= Ax.Bx) full GPD1  
Int\_AB = -0.07 and Int\_BA = 0.1 at EC50

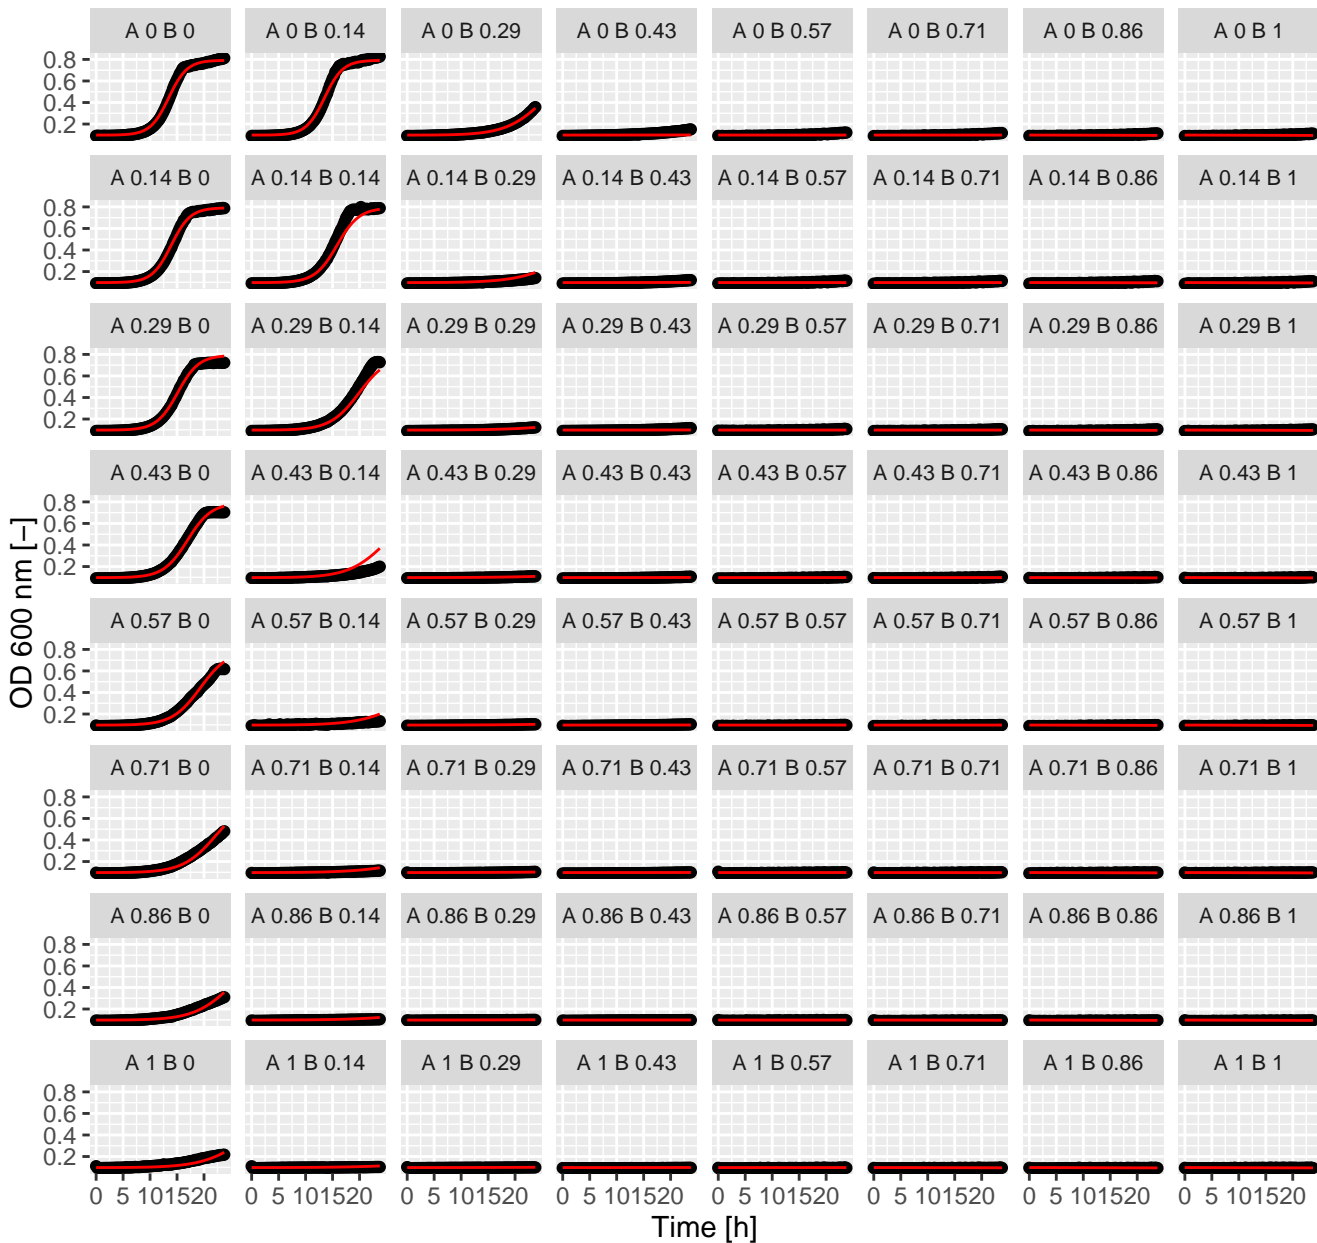



Pen.Sta (= Ax.Bx) exp. additivity (LA)  
 Int\_AB = 0 and Int\_BA = 0 at EC50

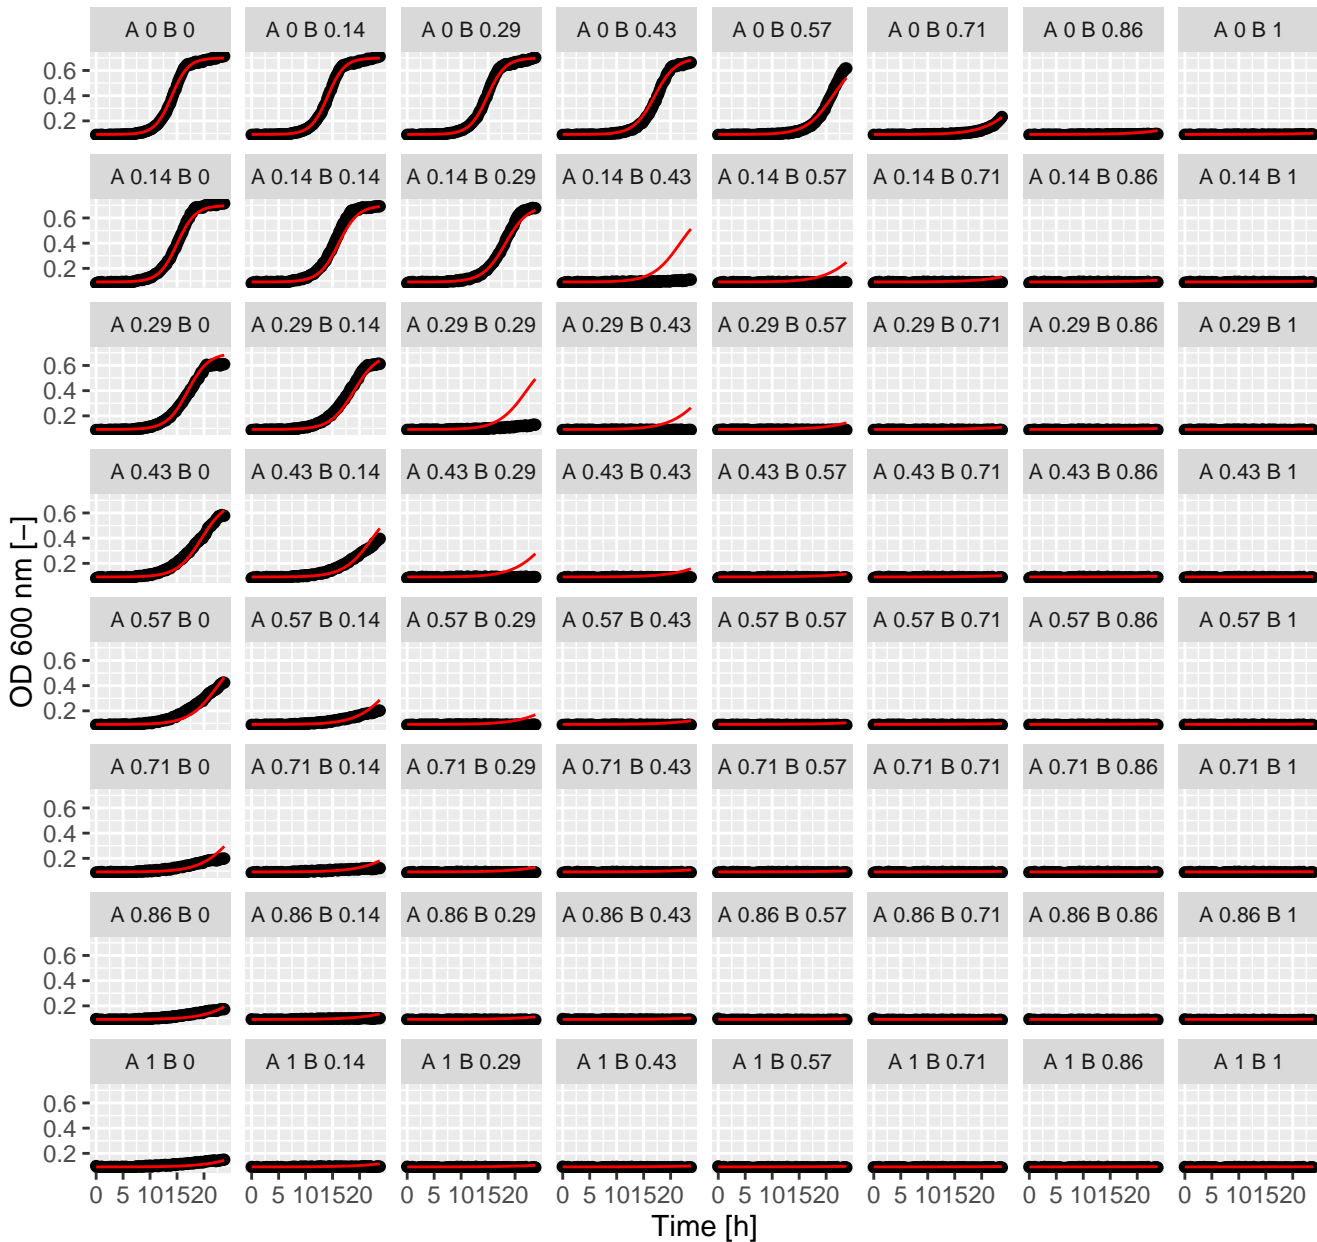

Pen.Sta (= Ax.Bx) full GPDI  
 Int\_AB = 8.22 and Int\_BA = -0.77 at EC50

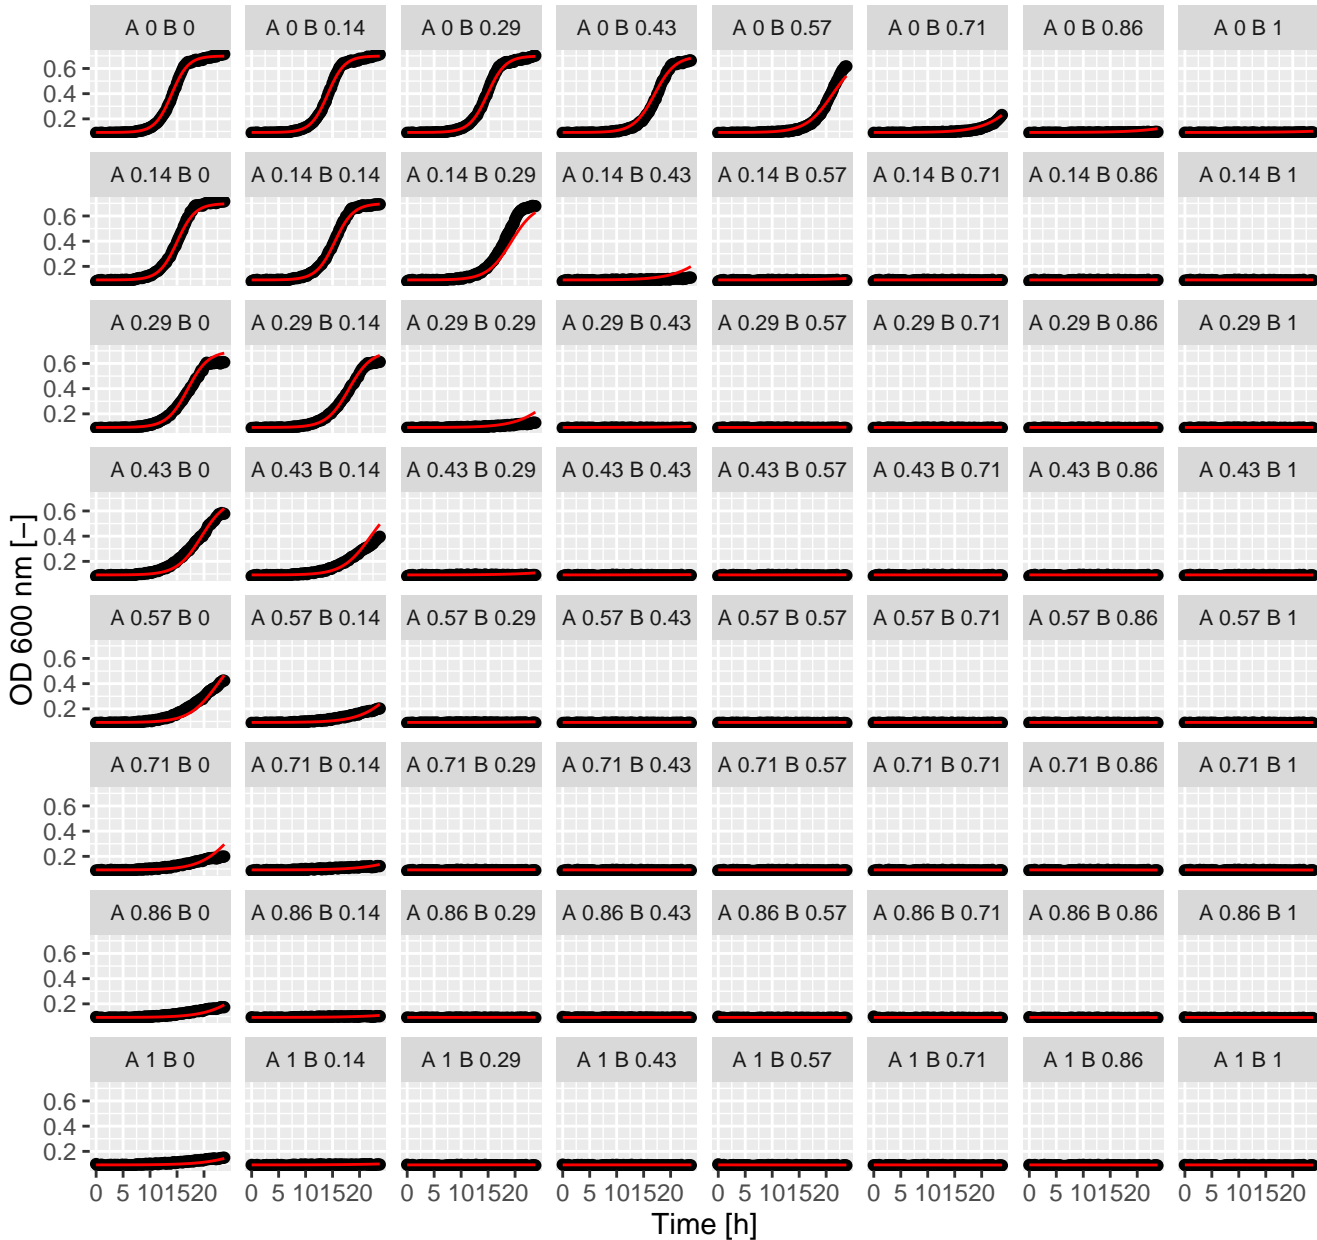

Pen.Tac (= Ax.Bx) exp. additivity (LA)  
Int\_AB = 0 and Int\_BA = 0 at EC50

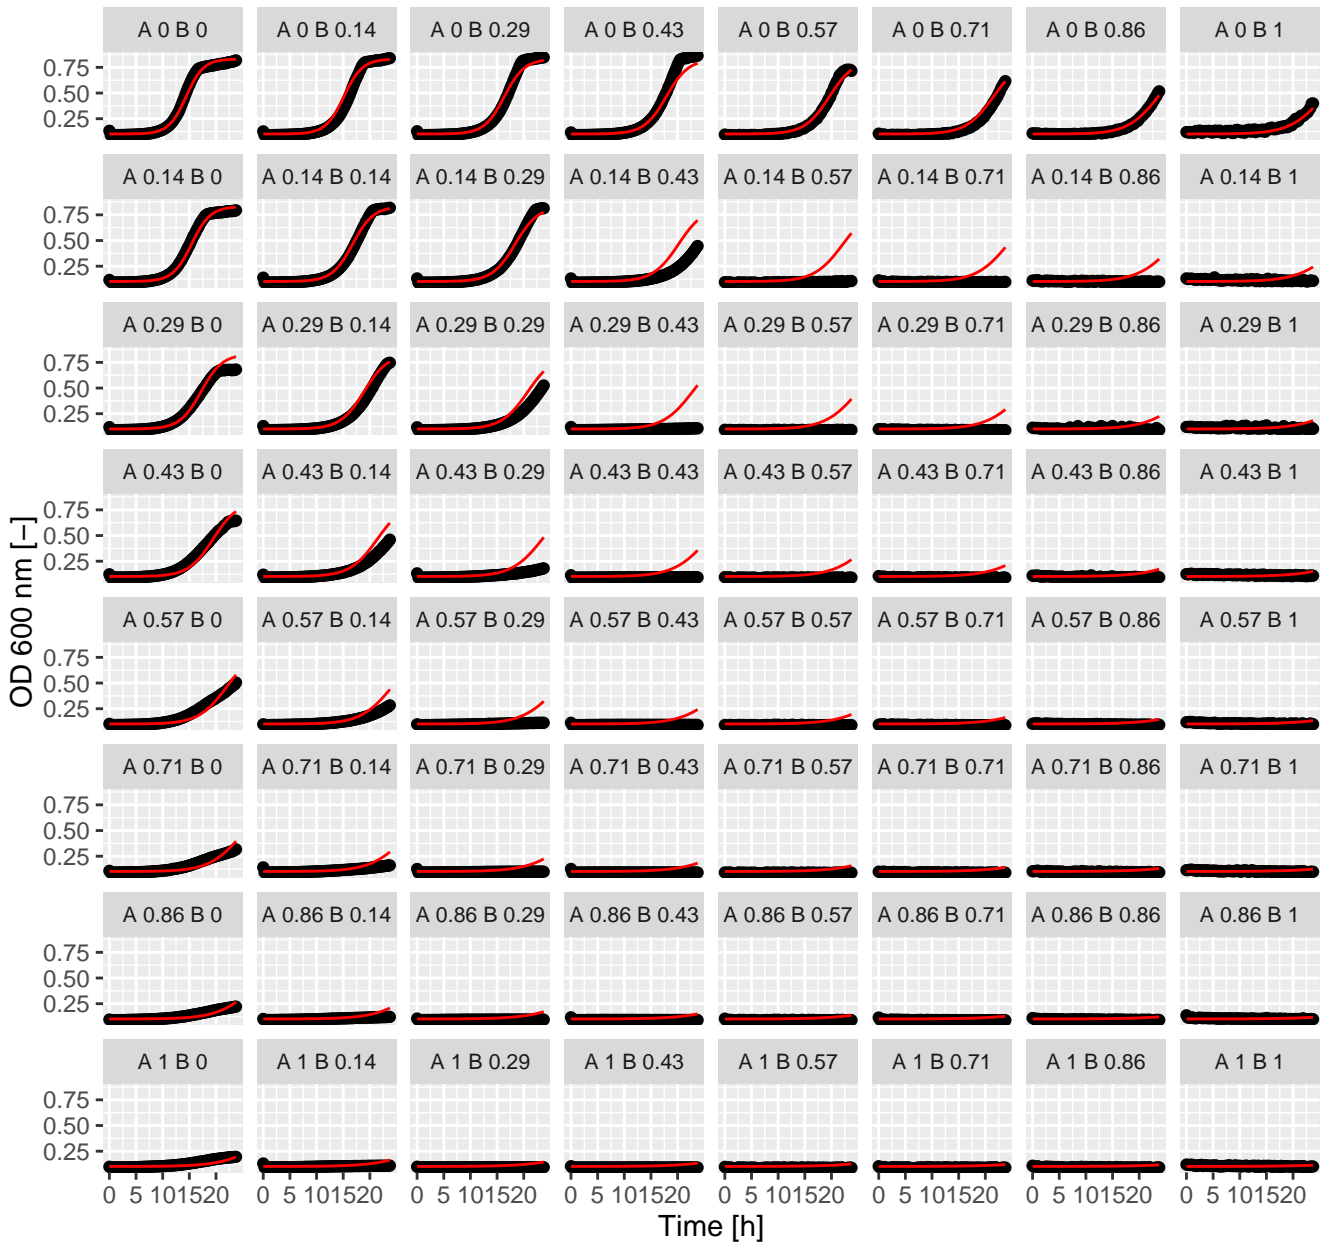

Pen.Tac (= Ax.Bx) full GPD1  
Int\_AB = -0.64 and Int\_BA = -0.46 at EC50

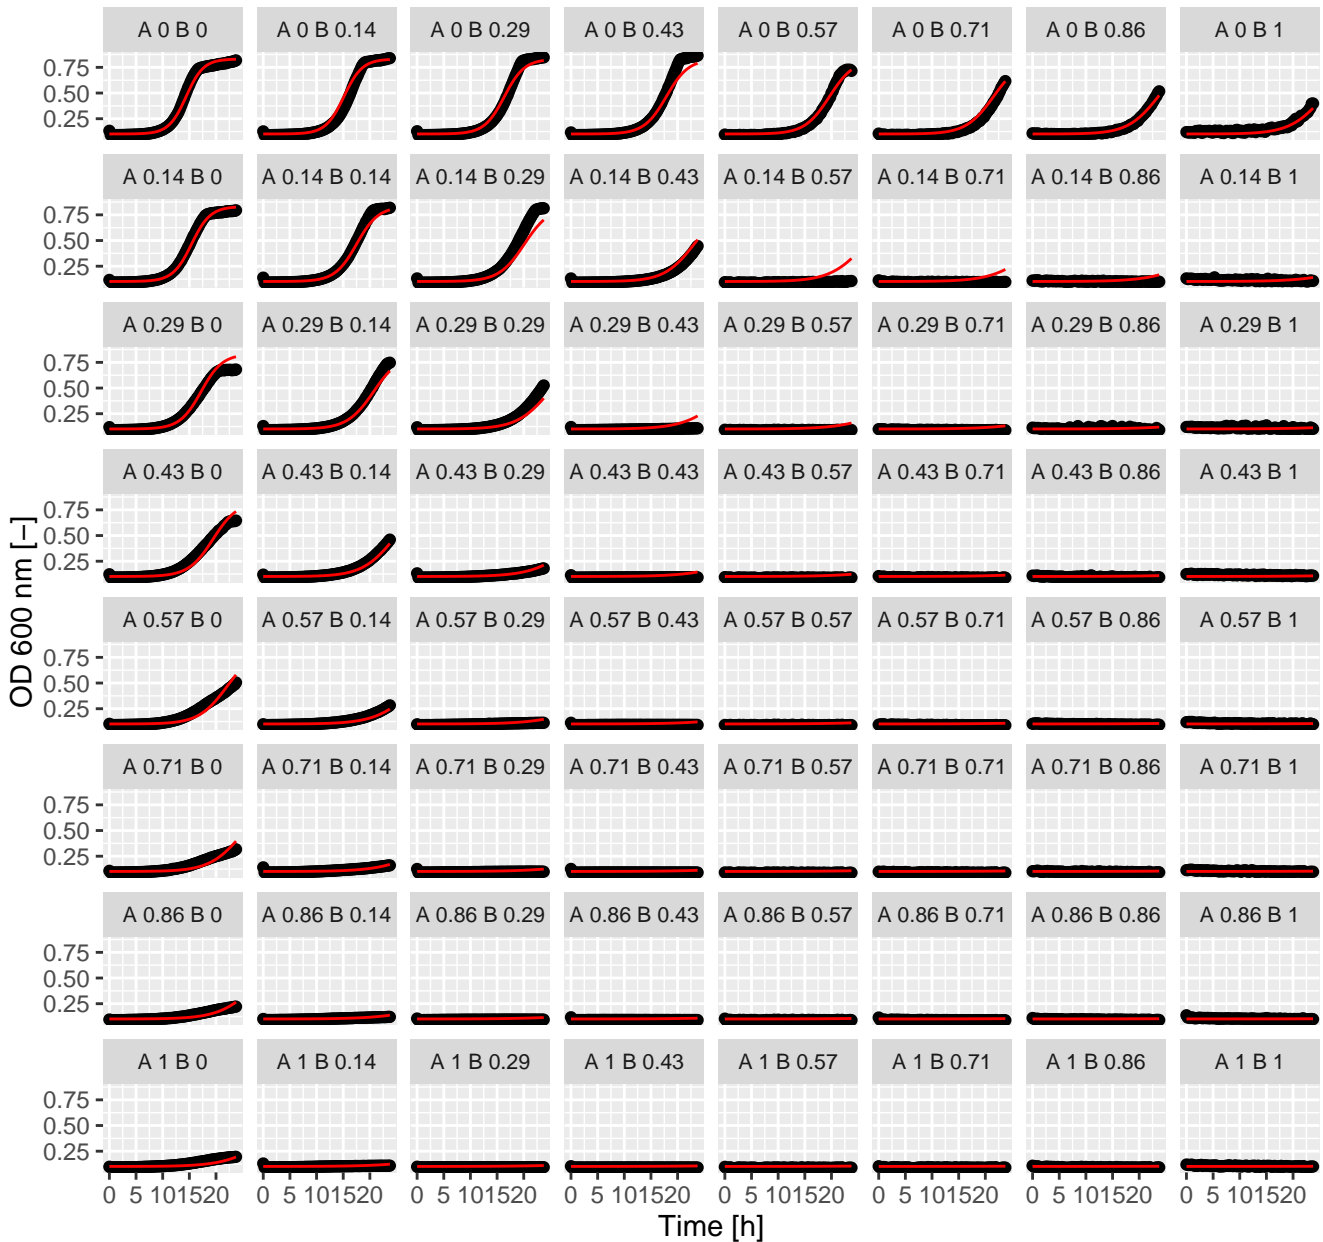

Pen.Ter (= Ax.Bx) exp. additivity (LA)  
Int\_AB = 0 and Int\_BA = 0 at EC50

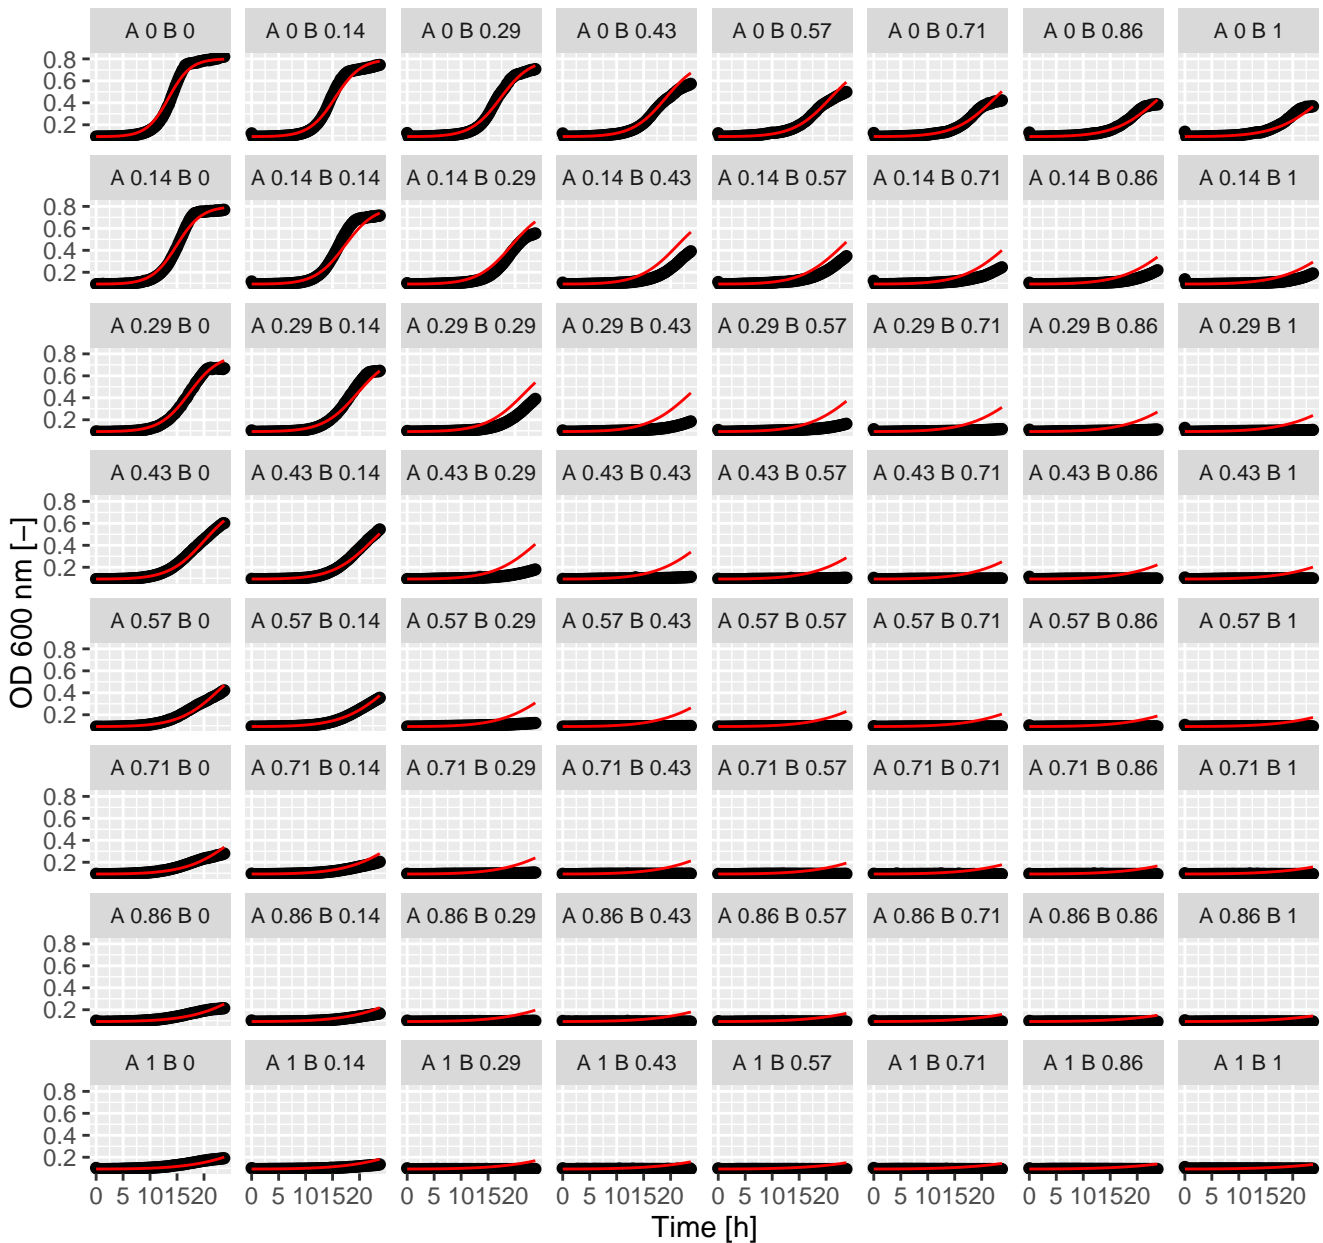

Pen.Ter (= Ax.Bx) full GPDI  
Int\_AB = -0.74 and Int\_BA = 1.75 at EC50

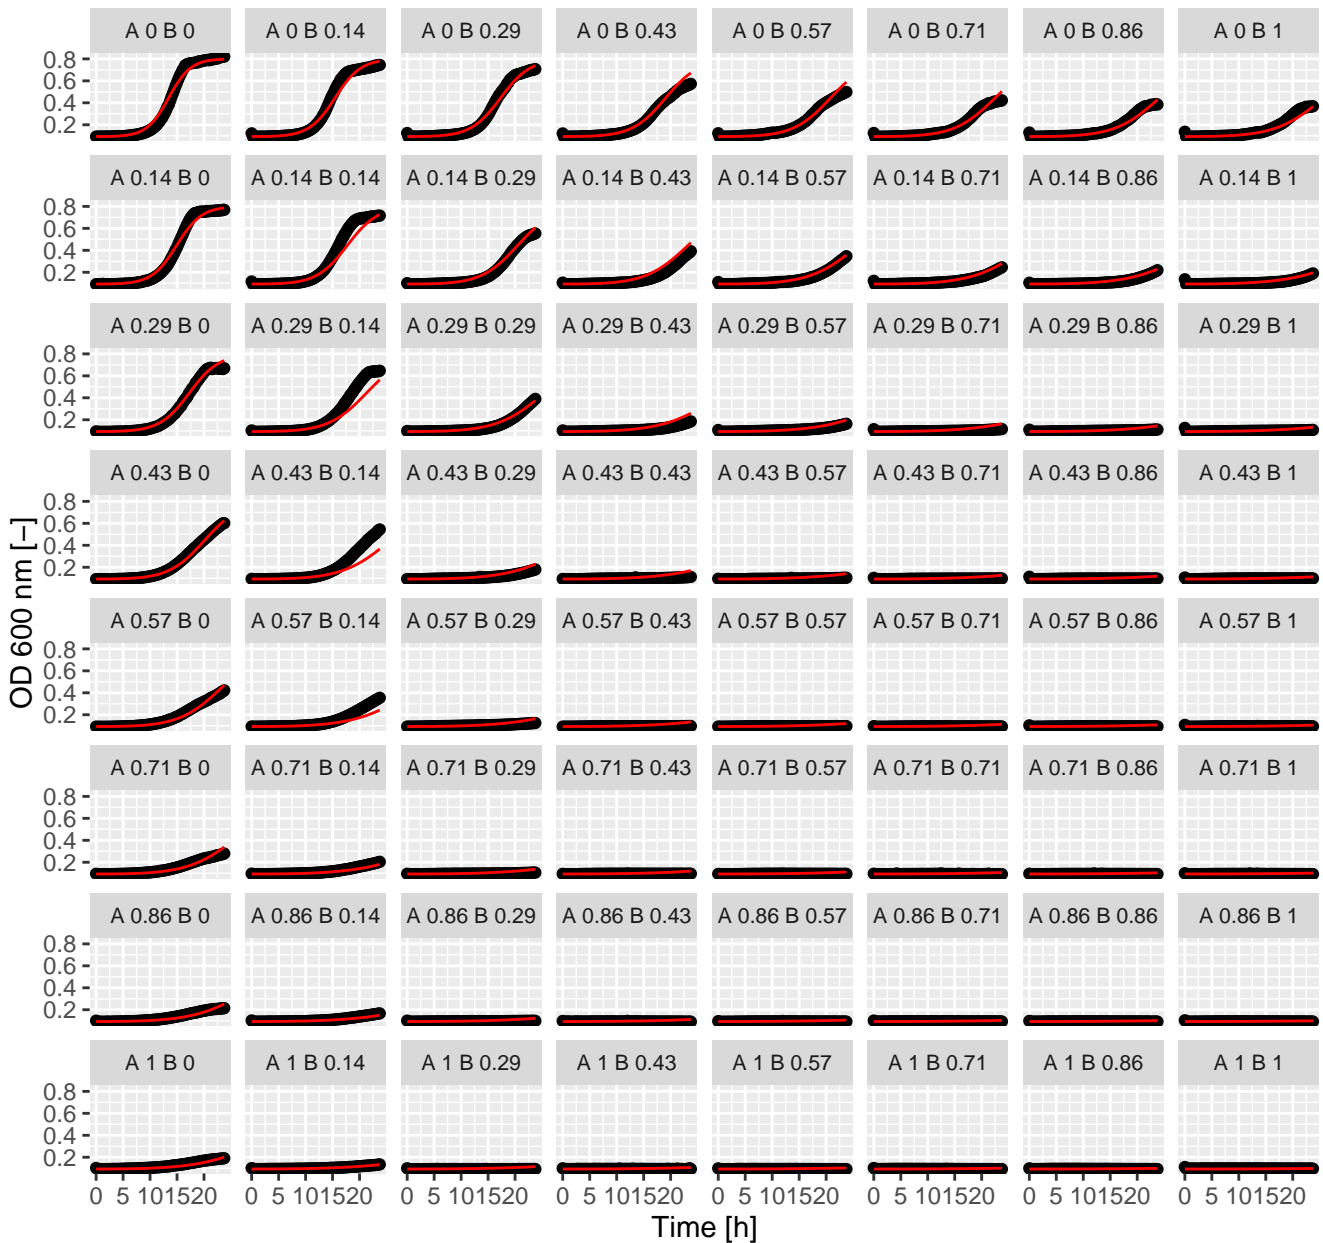

Pen.Tun (= Ax.Bx) exp. additivity (LA)  
Int\_AB = 0 and Int\_BA = 0 at EC50

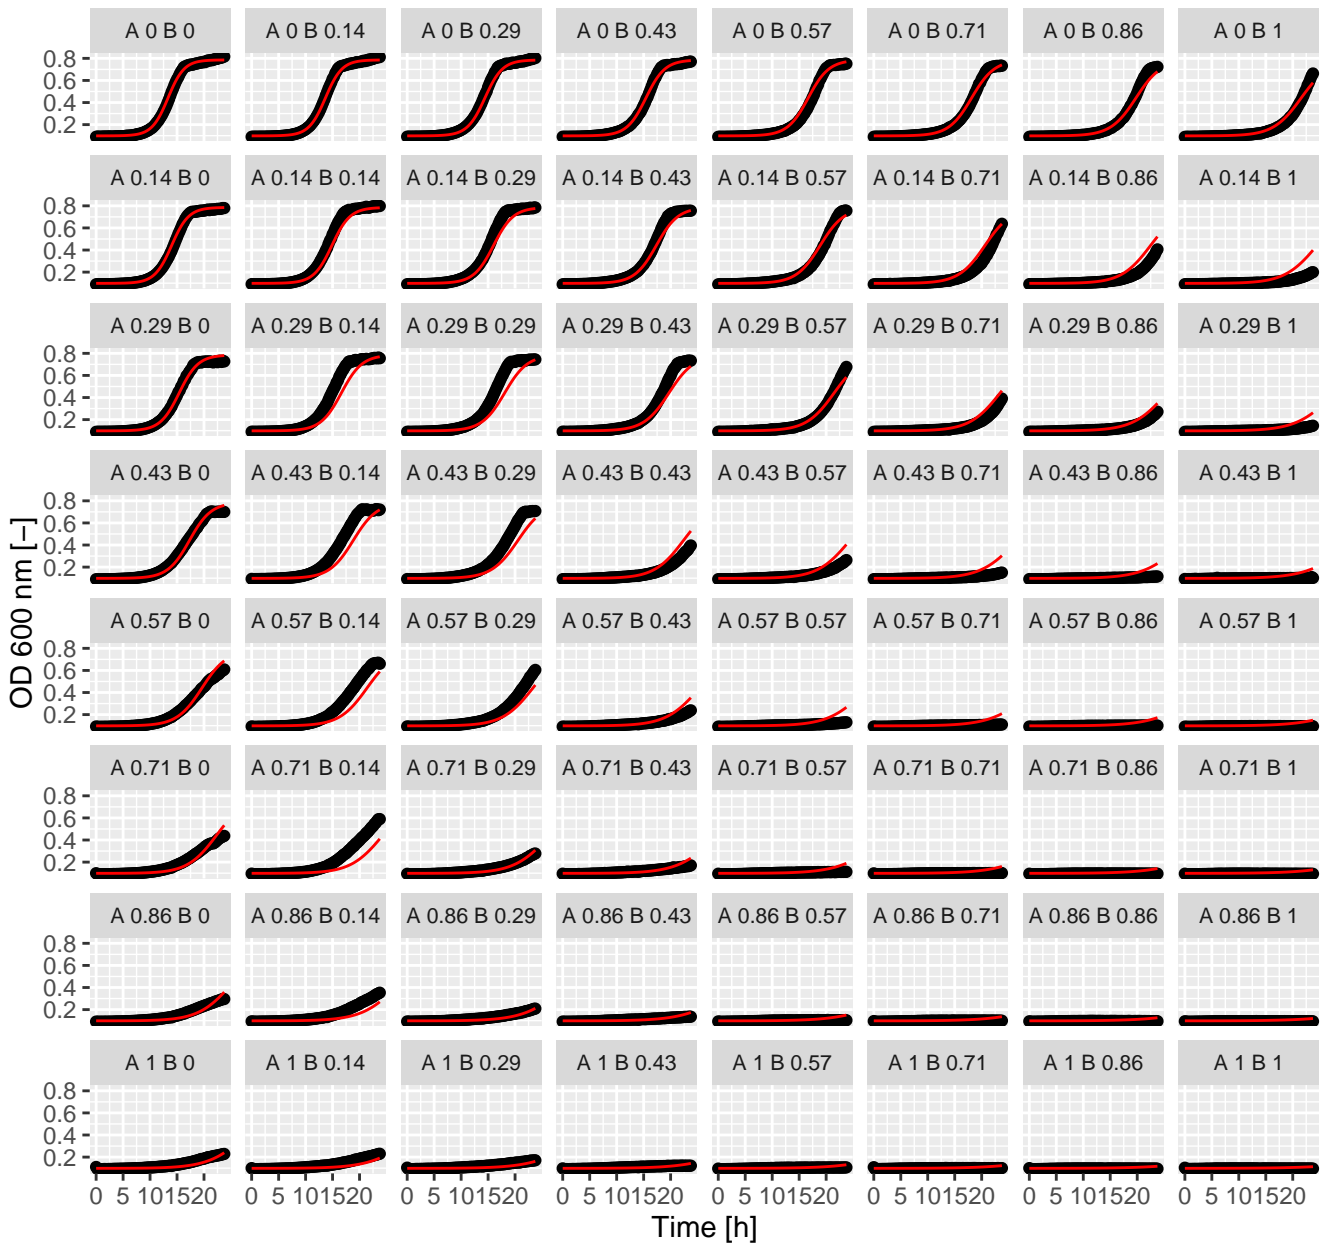

Pen.Tun (= Ax.Bx) full GPDI  
Int\_AB = 0 and Int\_BA = -0.05 at EC50

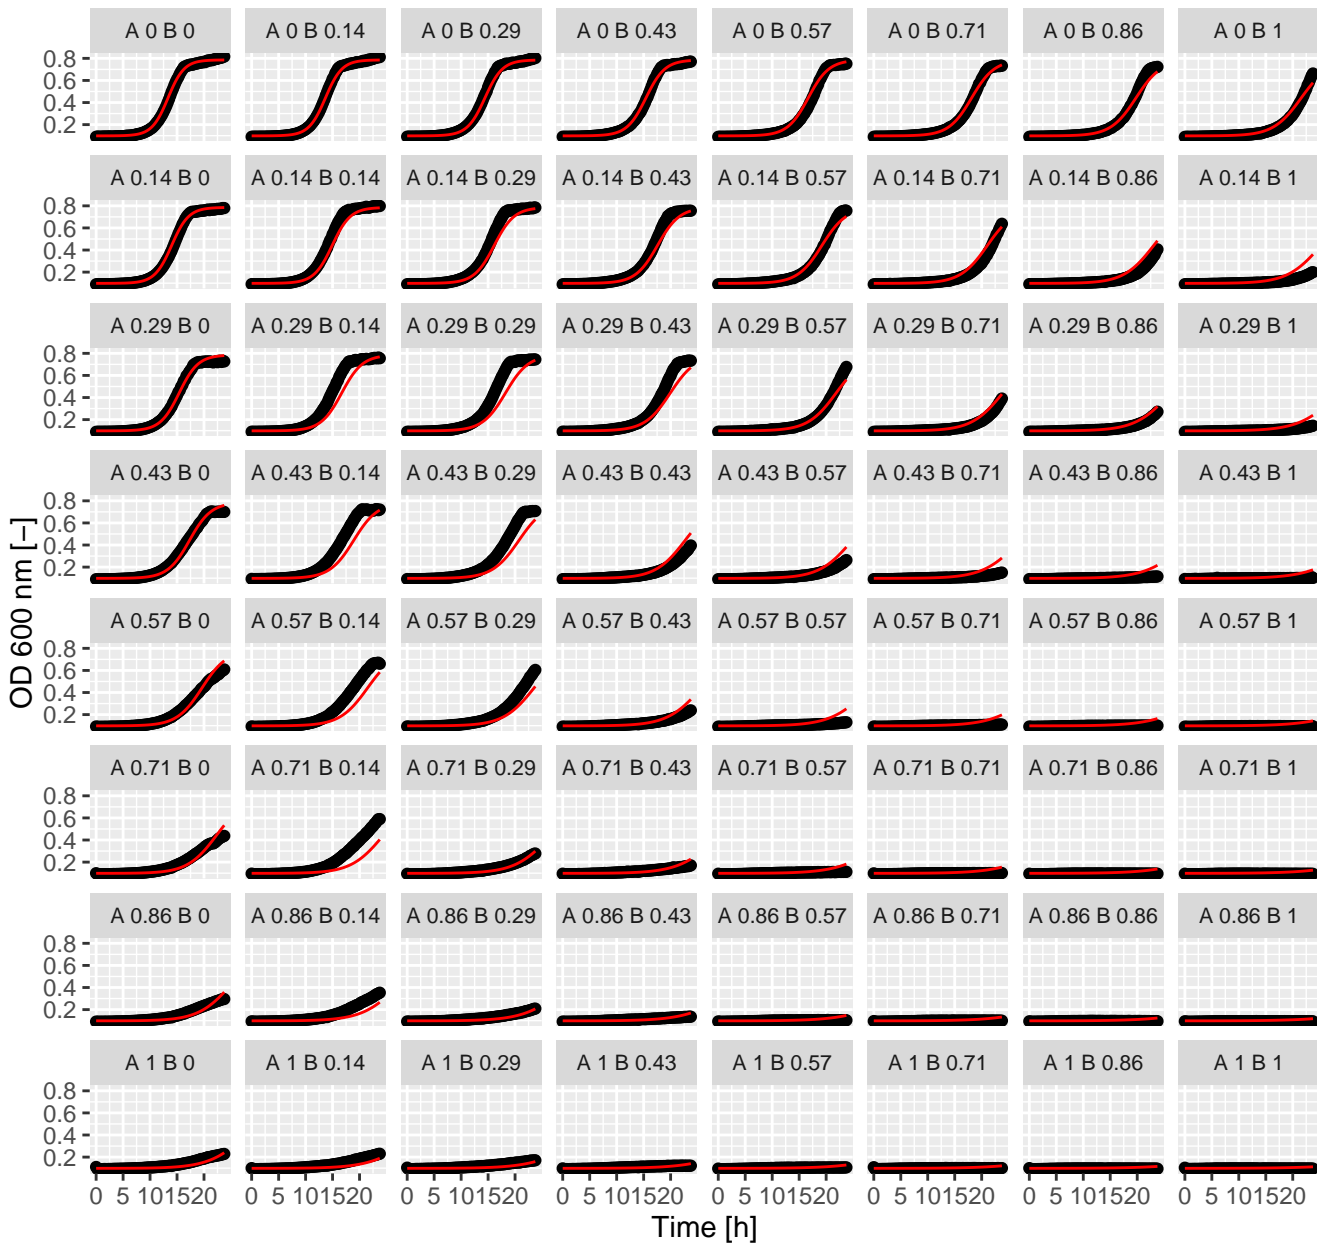



Qmy.Qmy (= Ax.Bx) exp. additivity (LA)  
Int\_AB = 0 and Int\_BA = 0 at EC50

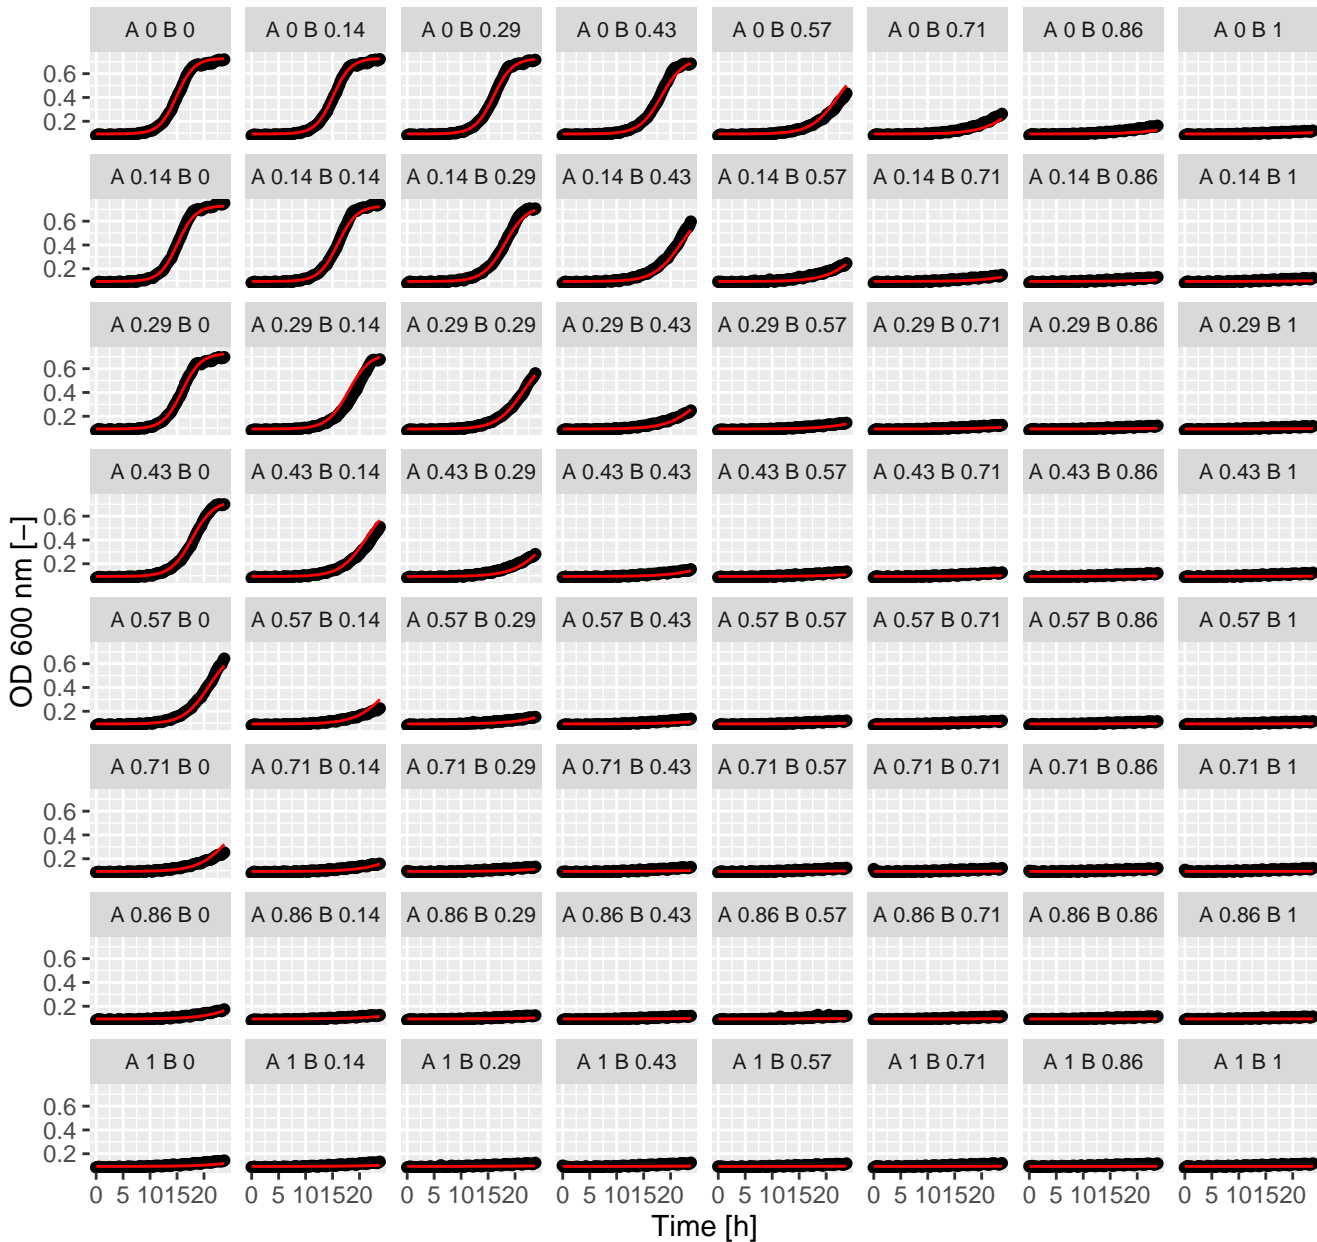

Qmy.Qmy (= Ax.Bx) full GPDI  
Int\_AB = -0.14 and Int\_BA = 0.5 at EC50

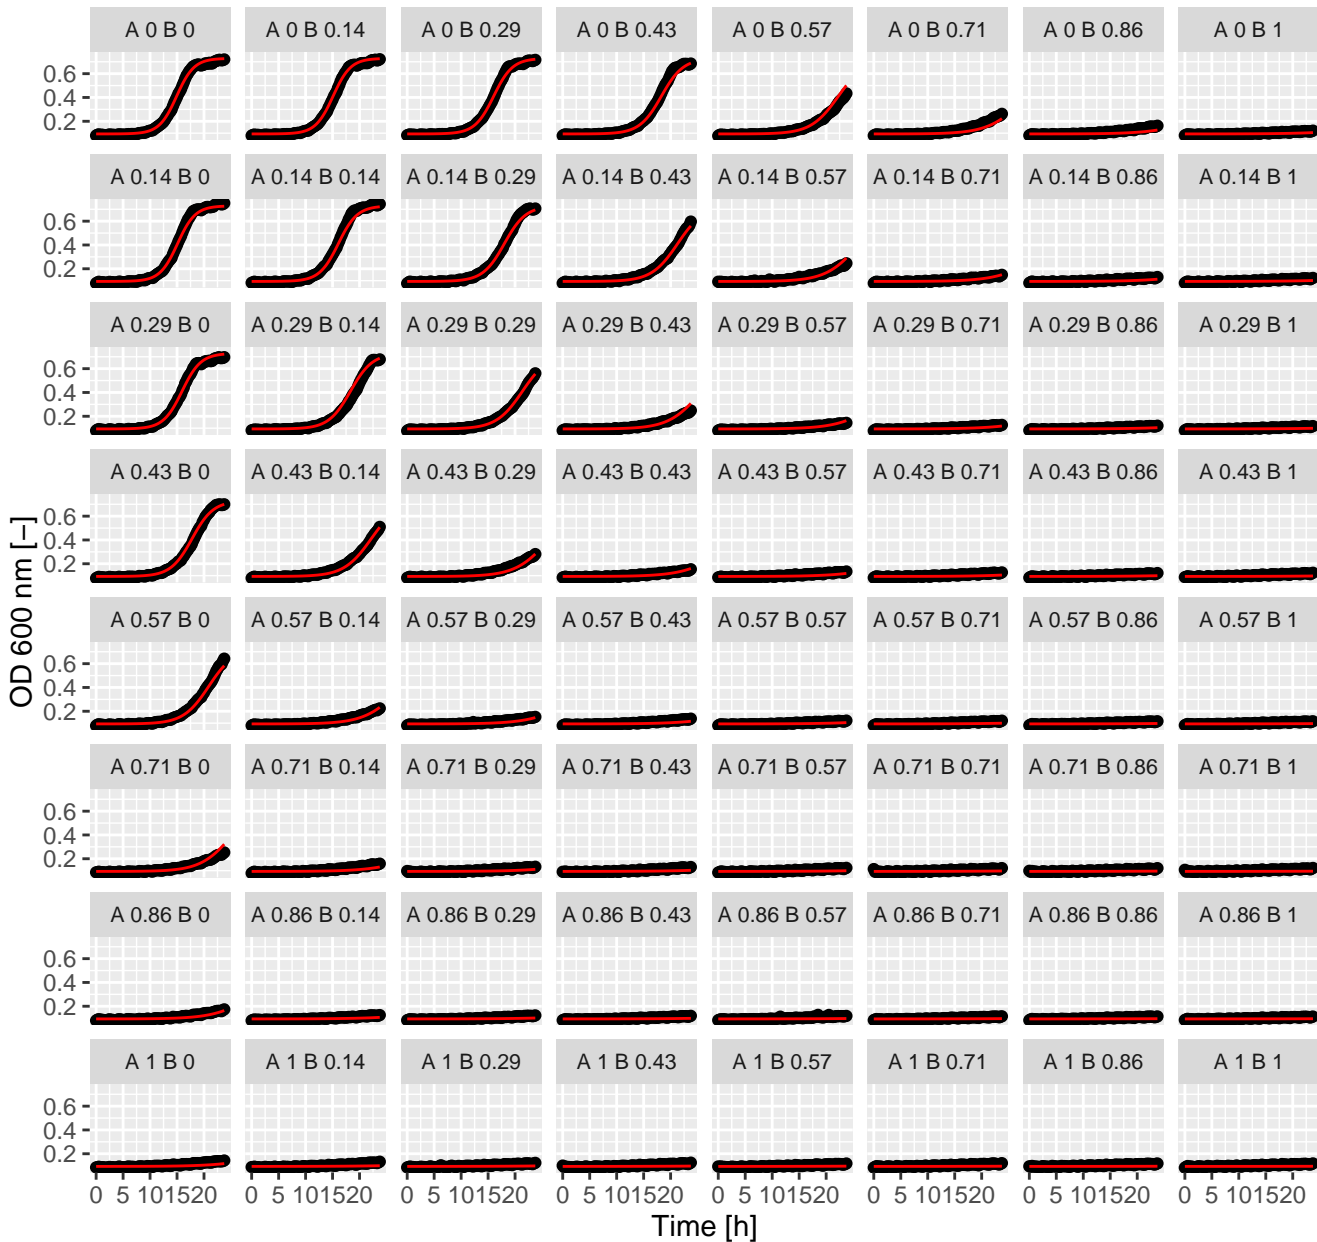

Qmy.Sta (= Ax.Bx) exp. additivity (LA)  
Int\_AB = 0 and Int\_BA = 0 at EC50

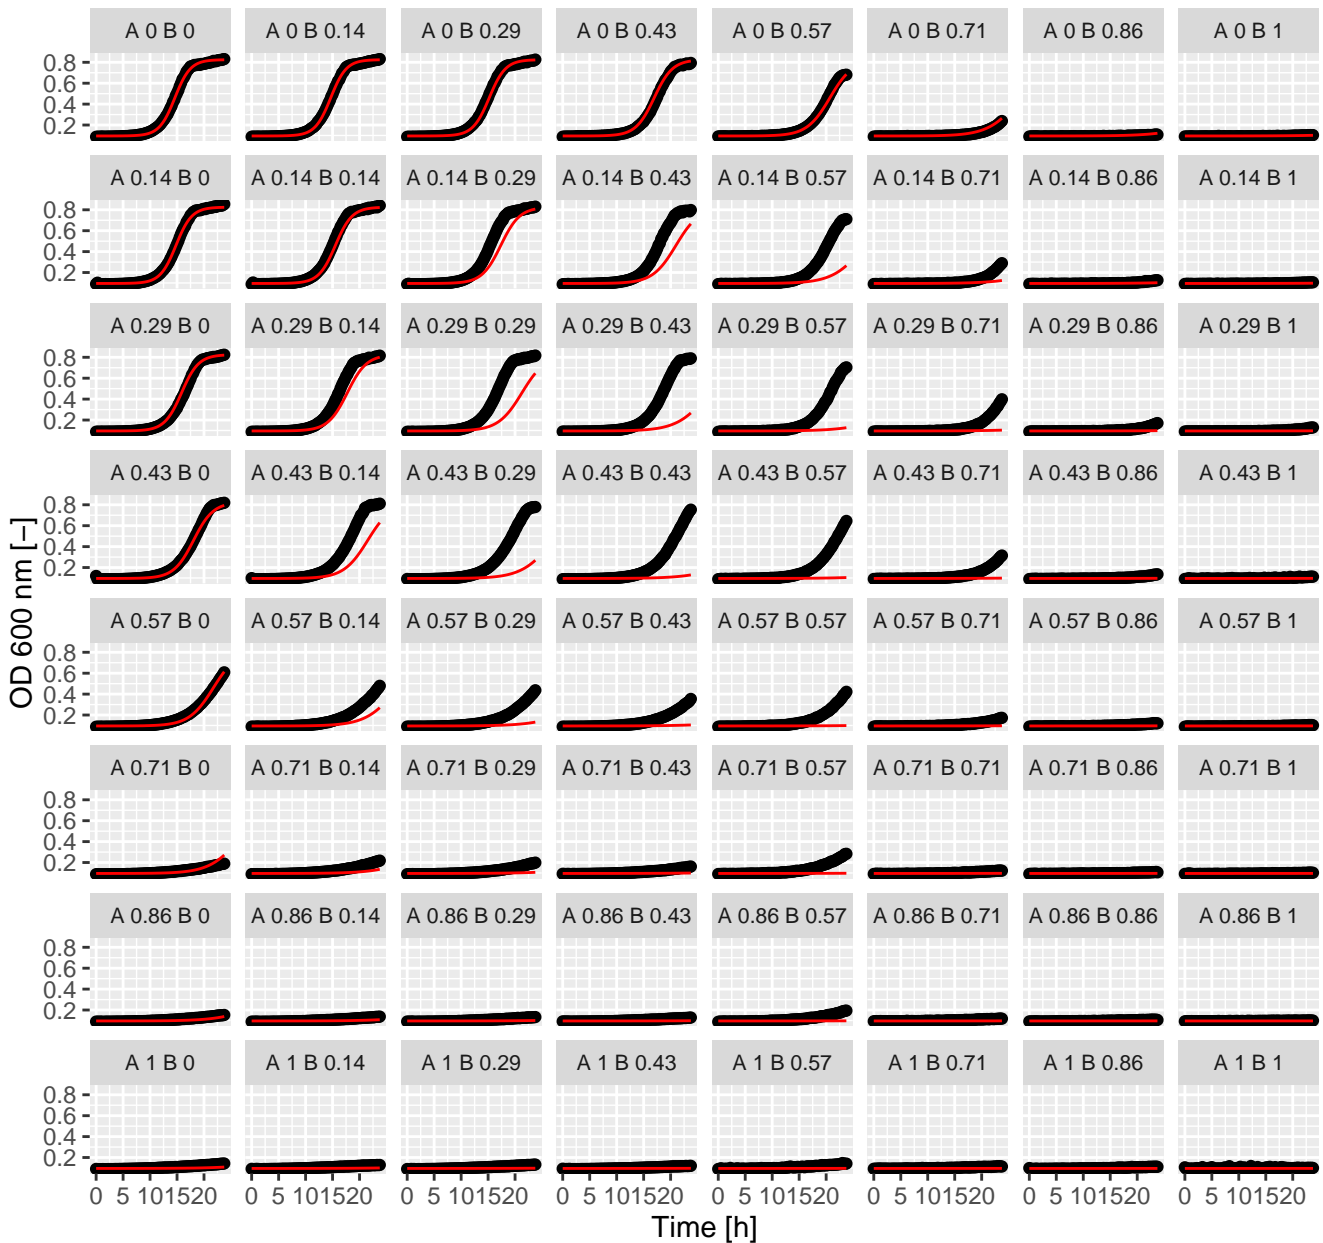

Qmy.Sta (= Ax.Bx) full GPD1  
Int\_AB = 0.77 and Int\_BA = 0.87 at EC50

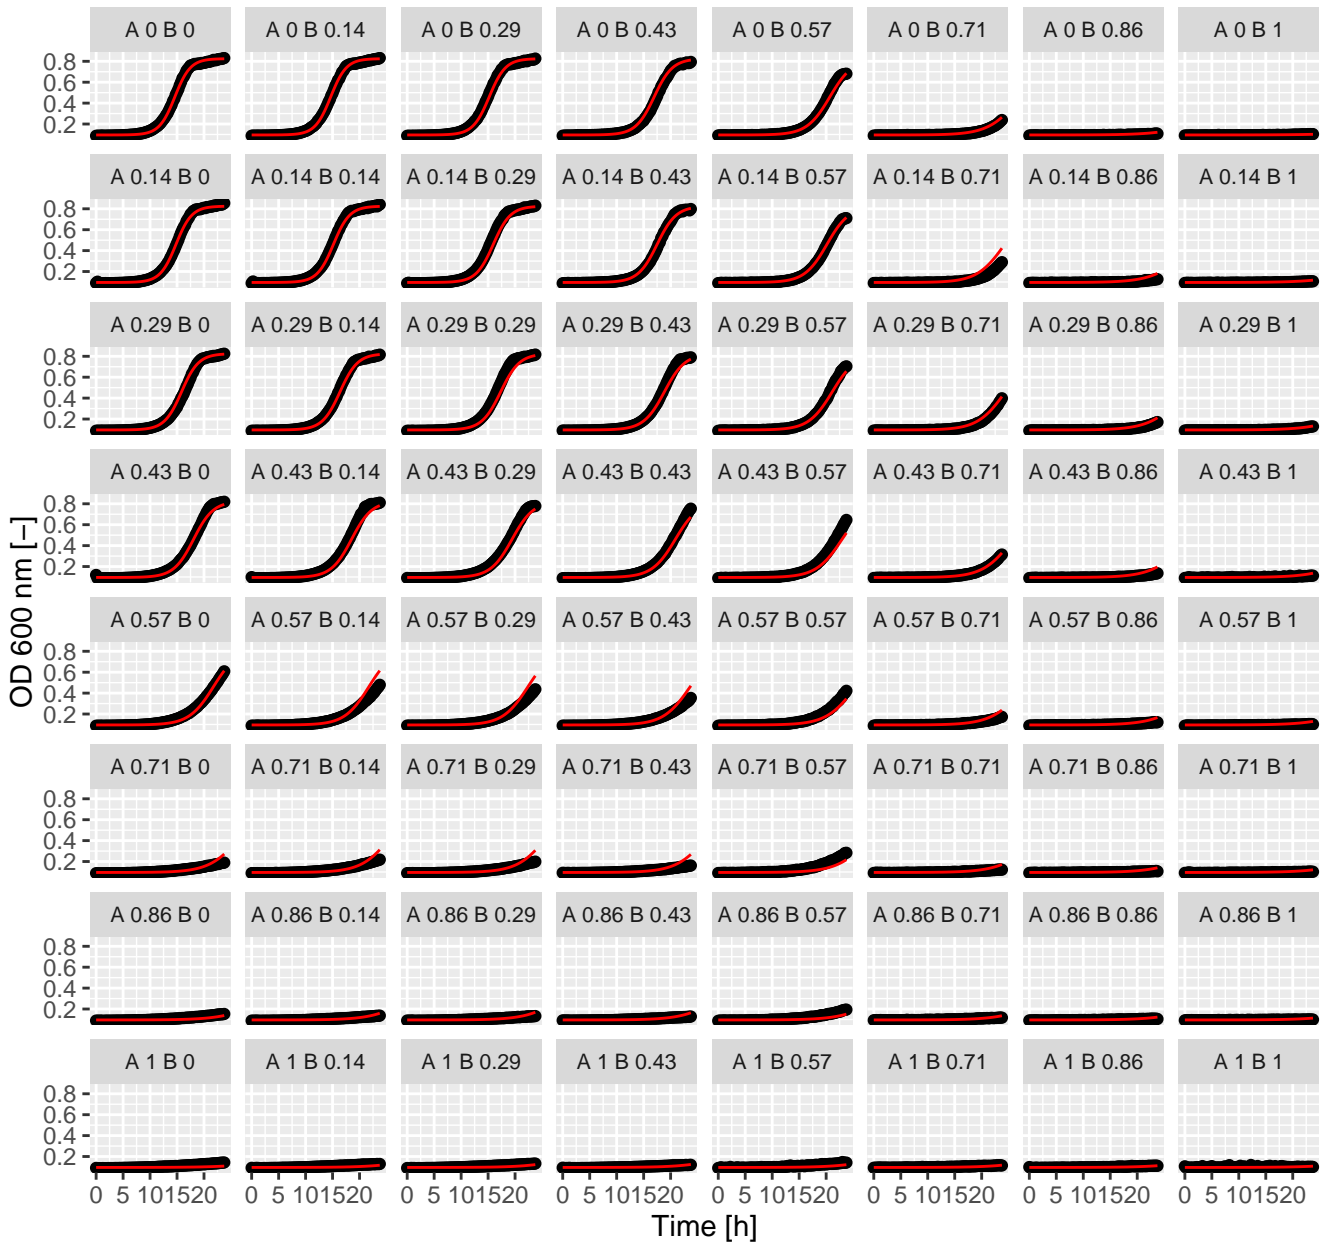

Qmy.Tac (= Ax.Bx) exp. additivity (LA)  
Int\_AB = 0 and Int\_BA = 0 at EC50

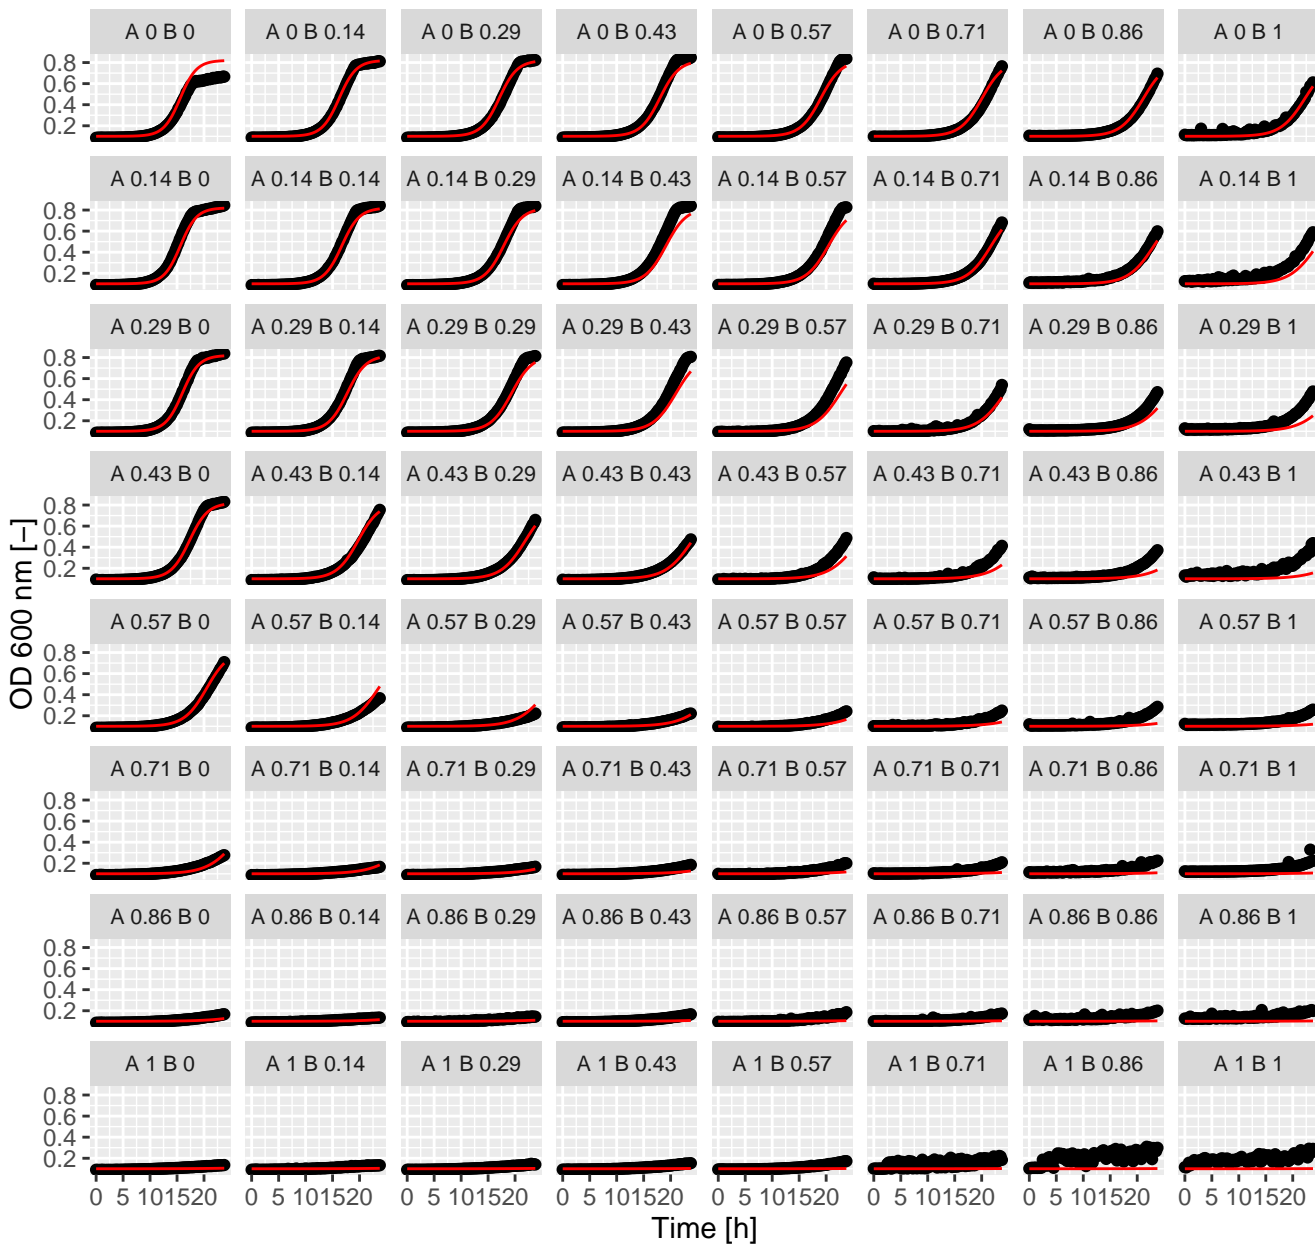

Qmy.Tac (= Ax.Bx) full GPDI  
Int\_AB = 0.32 and Int\_BA = 0.53 at EC50

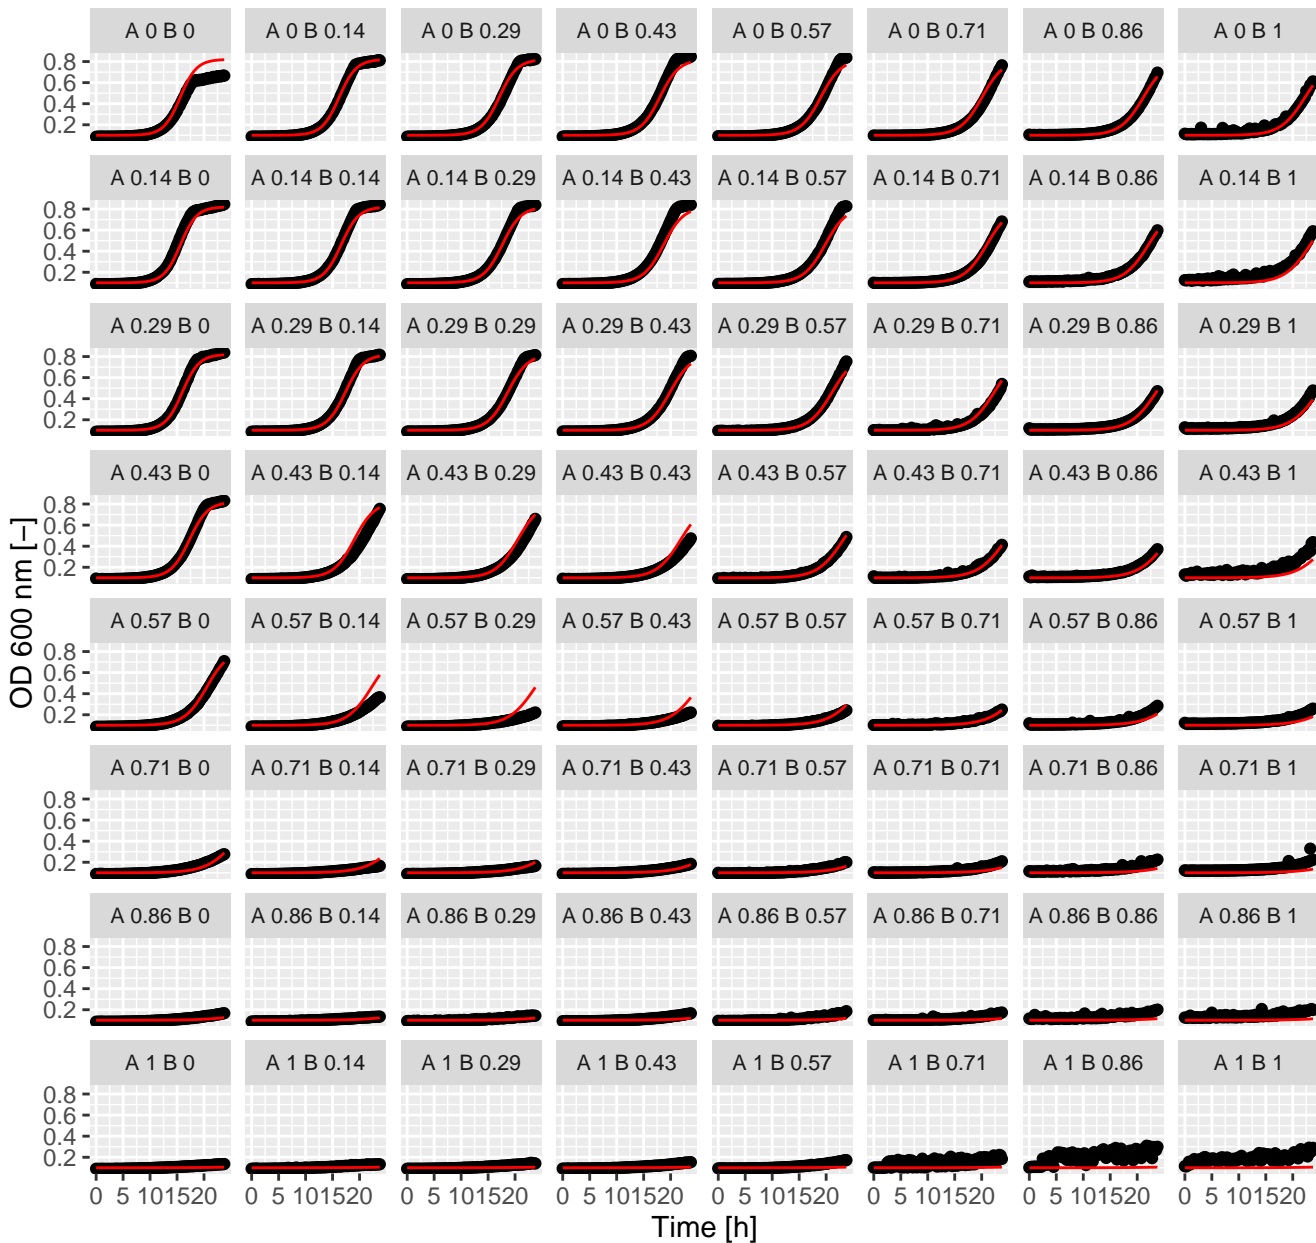

Qmy.Ter (= Ax.Bx) exp. additivity (LA)  
 Int\_AB = 0 and Int\_BA = 0 at EC50

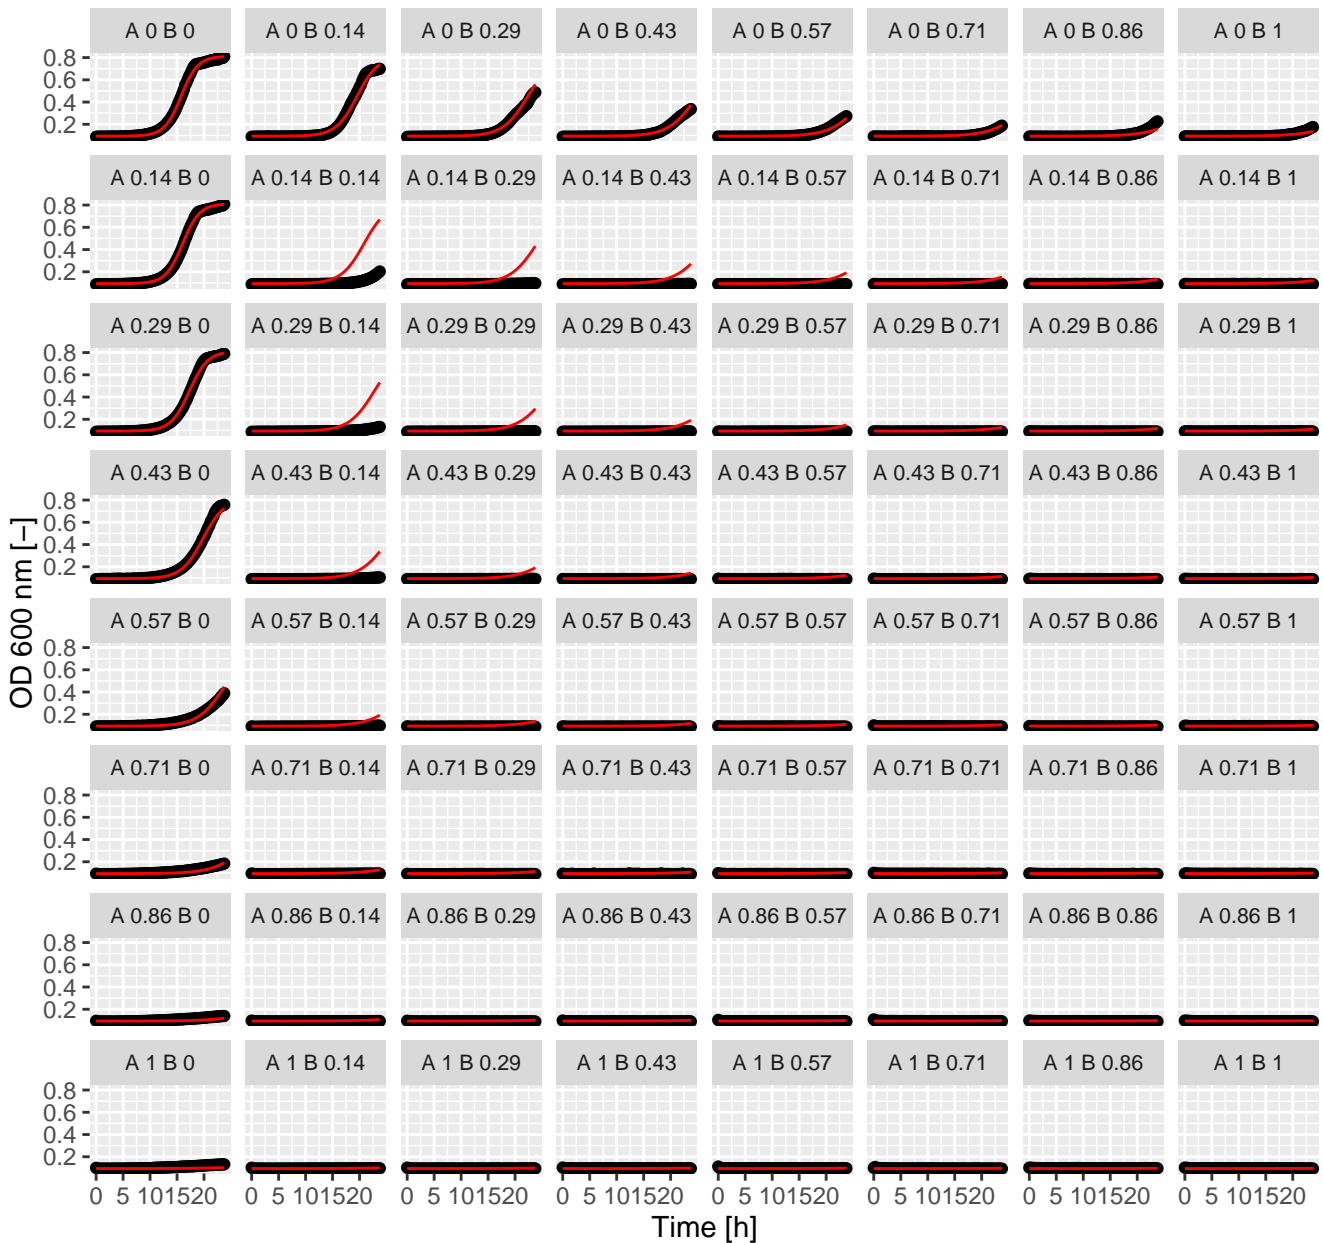

Qmy.Ter (= Ax.Bx) full GPDI  
Int\_AB = -0.93 and Int\_BA = -0.35 at EC50

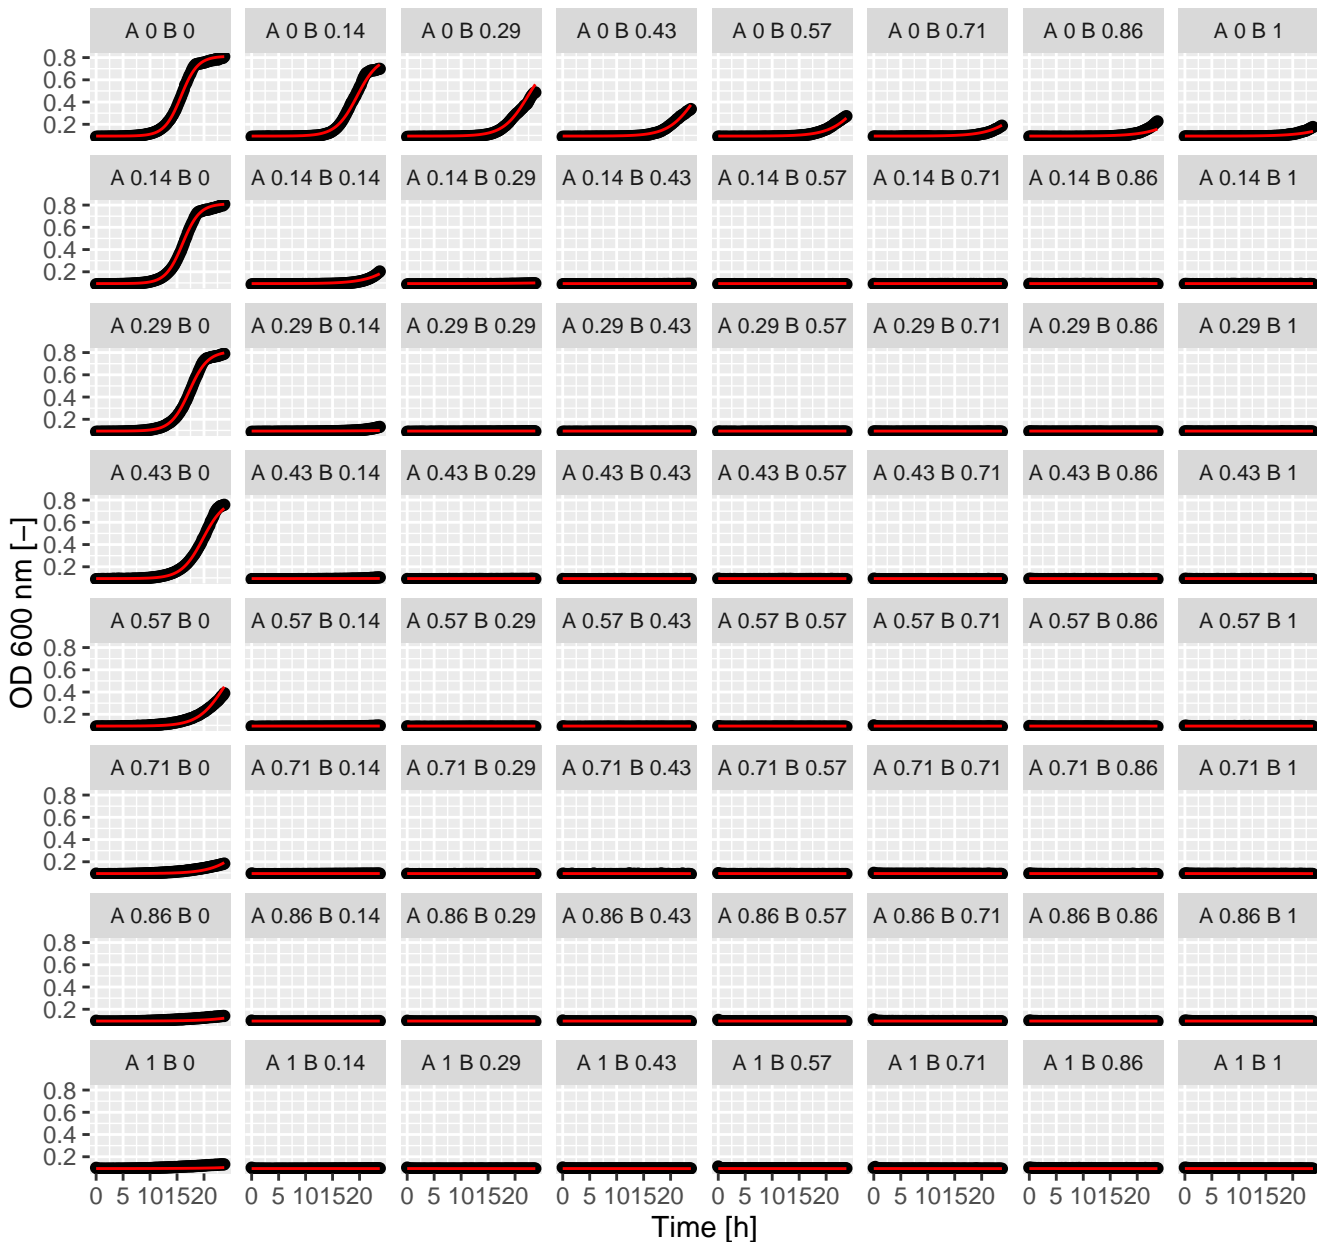



Qnn.Rad (= Ax.Bx) exp. additivity (LA)  
Int\_AB = 0 and Int\_BA = 0 at EC50

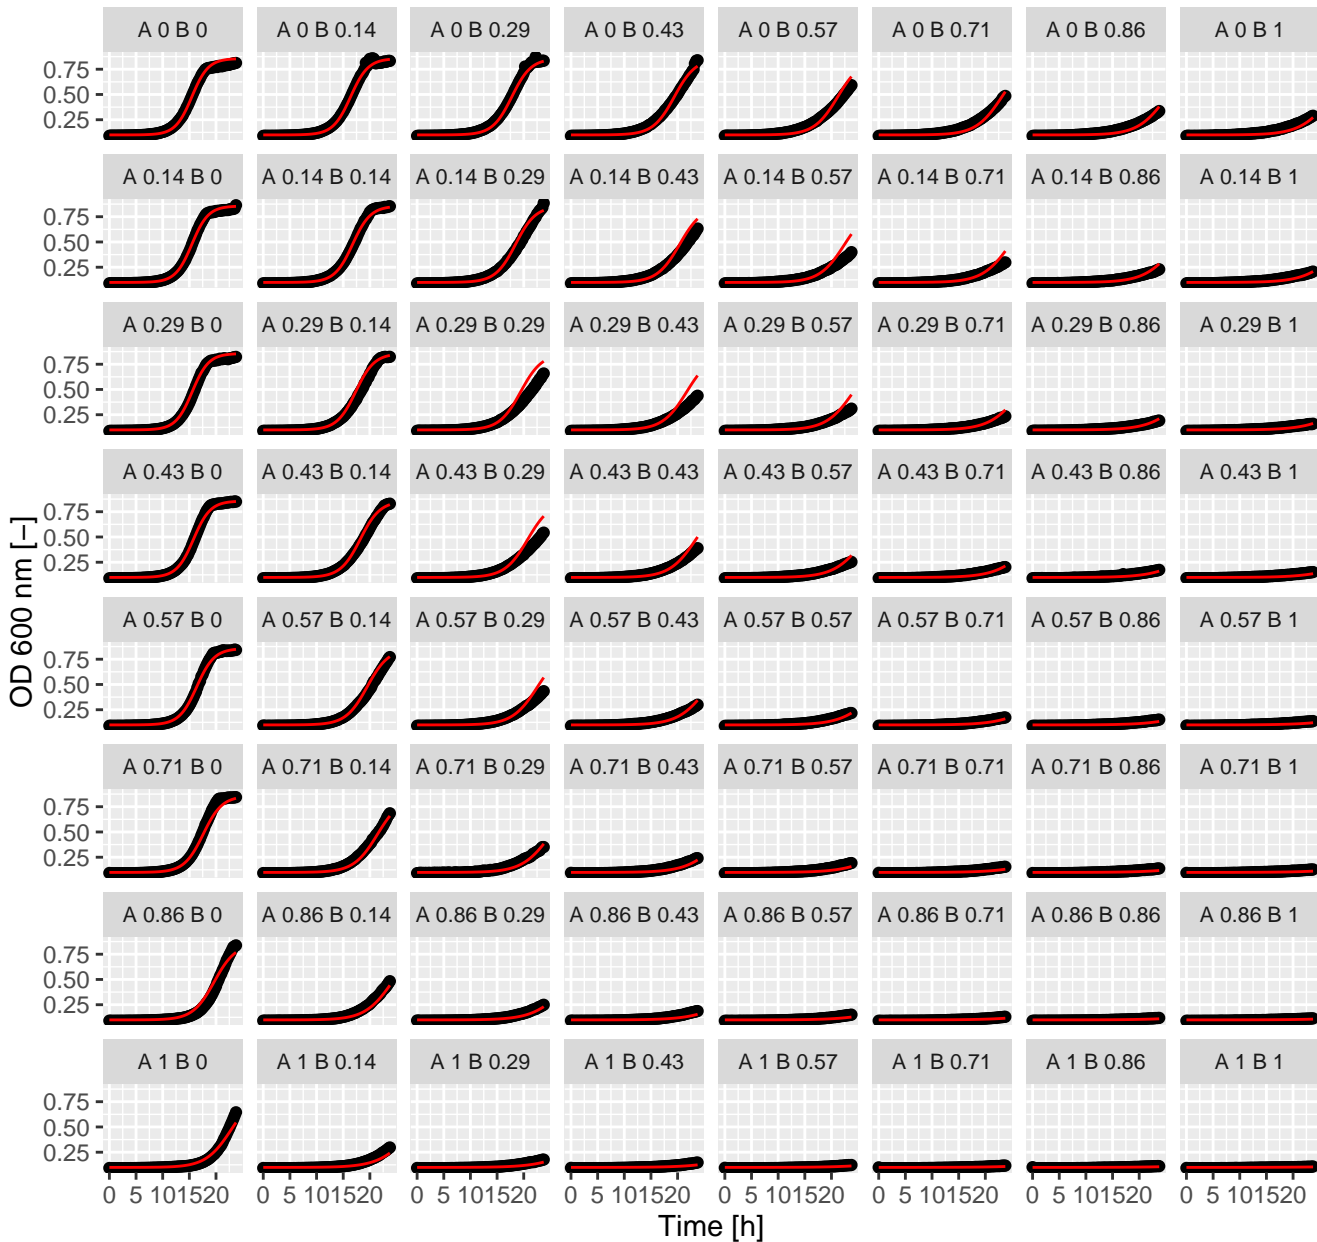

Qnn.Rad (= Ax.Bx) full GPDI  
Int\_AB = 1.38 and Int\_BA = -0.35 at EC50

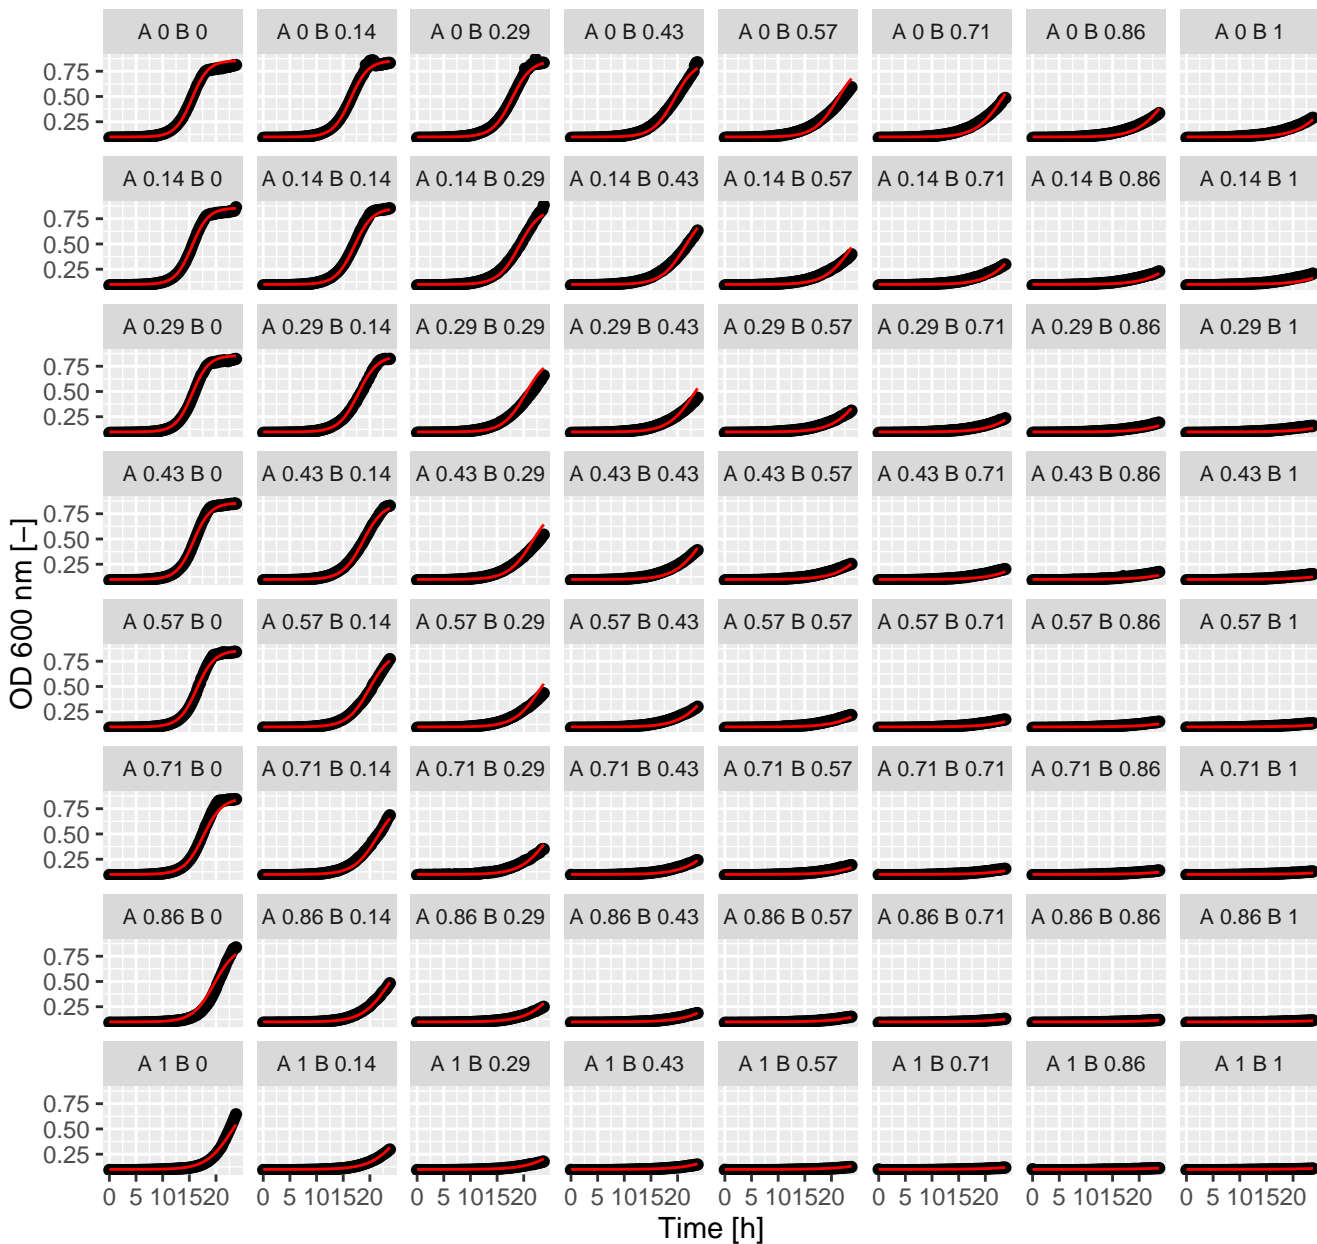

Rad.Rap (= Ax.Bx) exp. additivity (LA)  
Int\_AB = 0 and Int\_BA = 0 at EC50

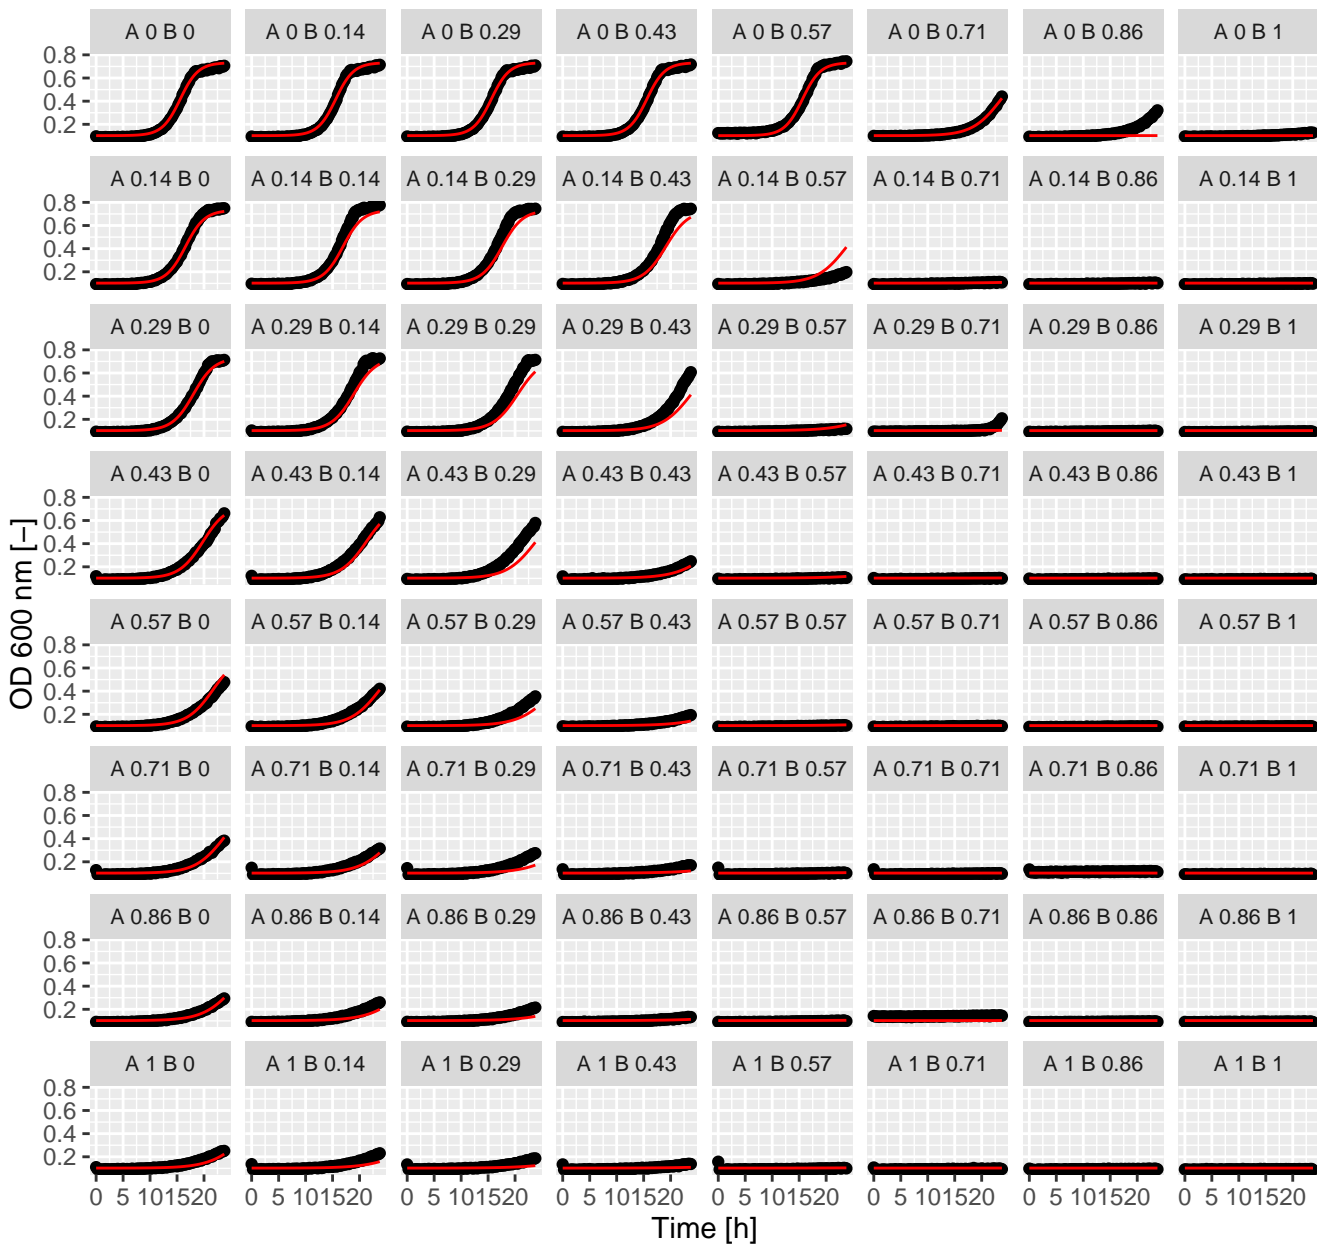

Rad.Rap (= Ax.Bx) full GPDI  
Int\_AB = 1.5 and Int\_BA = -0.19 at EC50

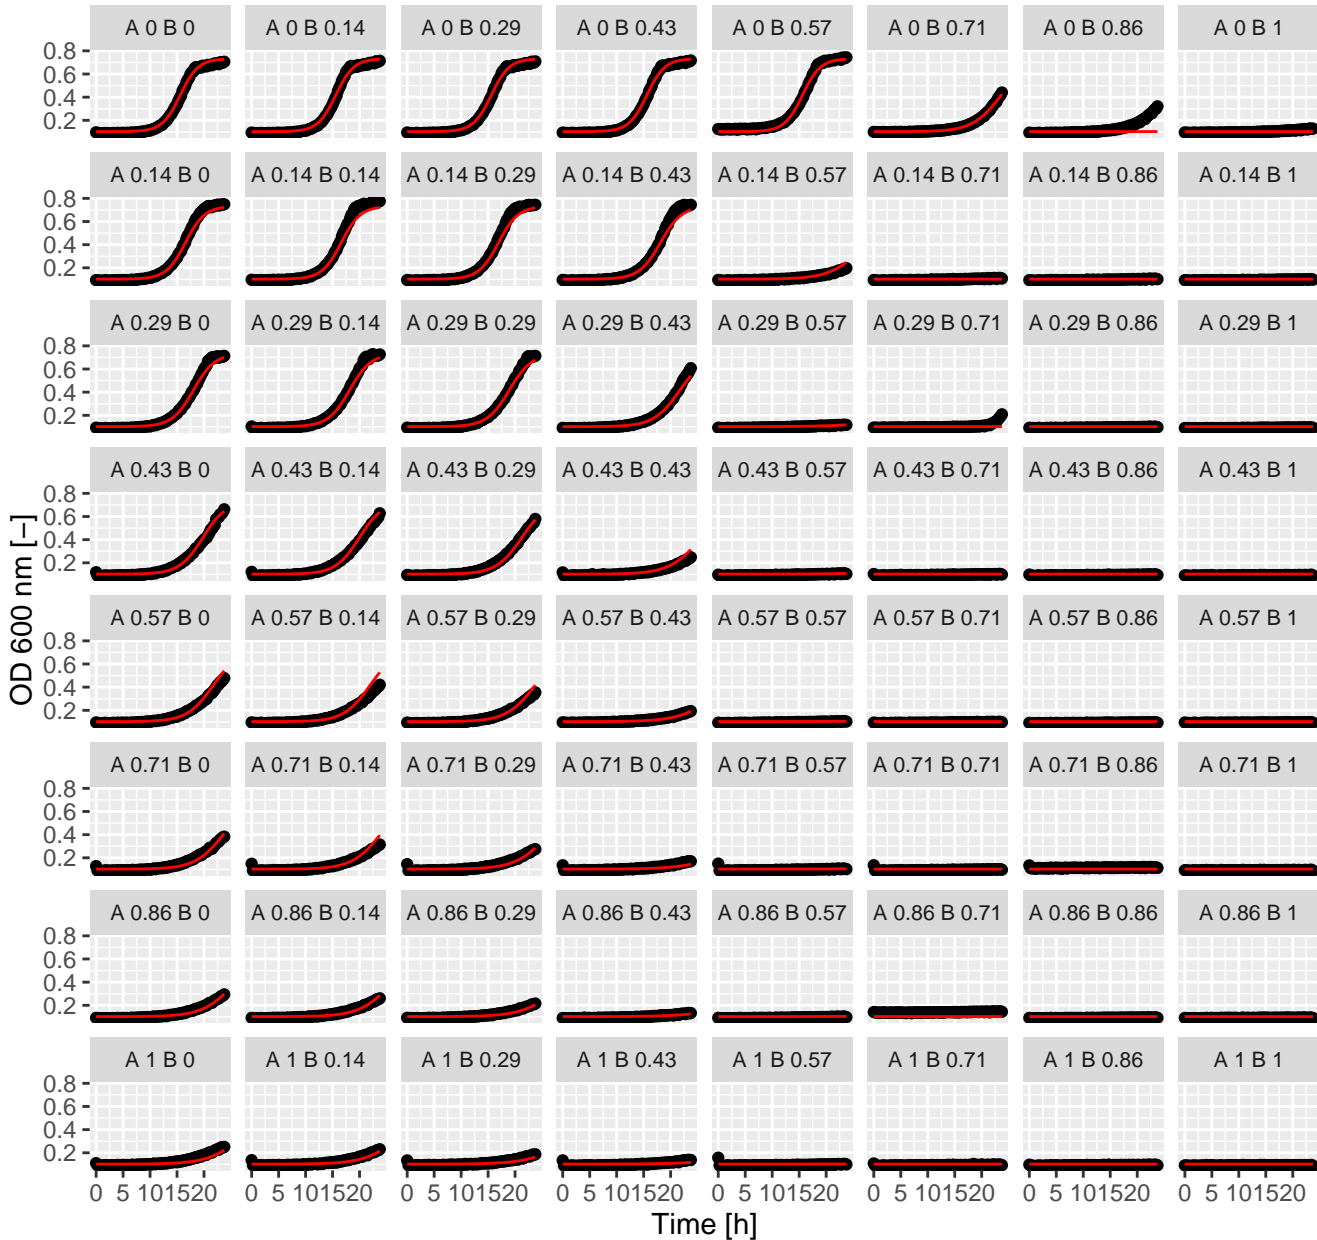

Rad.Sta (= Ax.Bx) exp. additivity (LA)  
 Int\_AB = 0 and Int\_BA = 0 at EC50

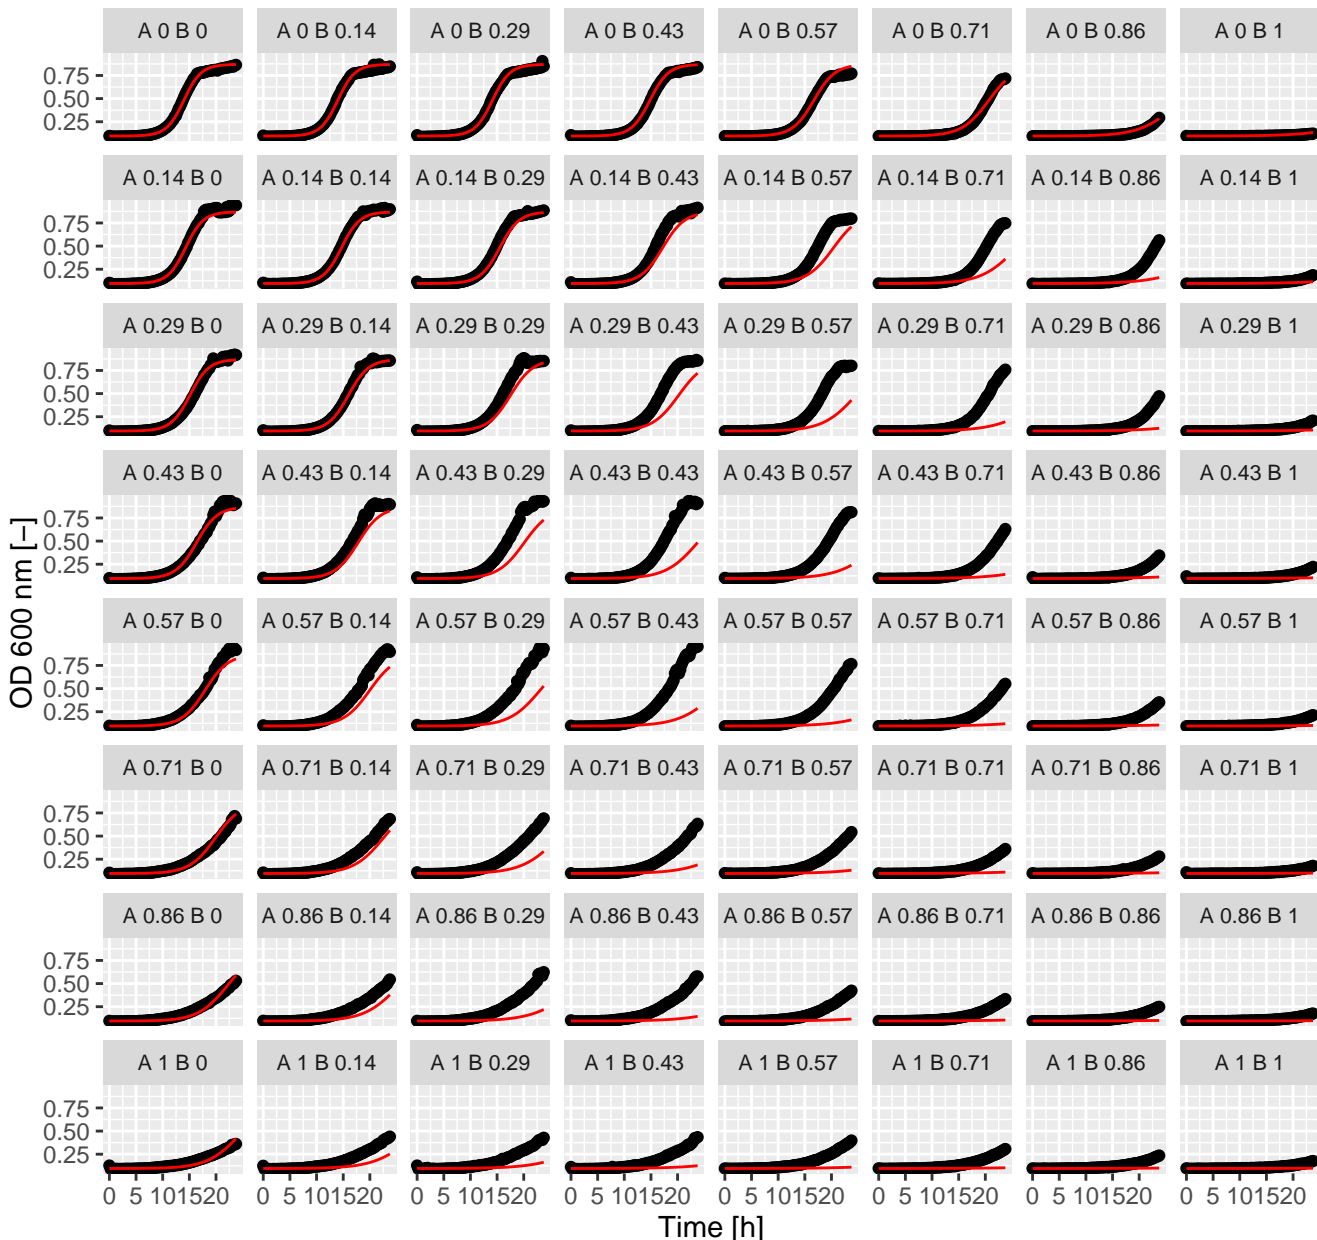

Rad.Sta (= Ax.Bx) full GPD1  
Int\_AB = 1.38 and Int\_BA = 0.38 at EC50

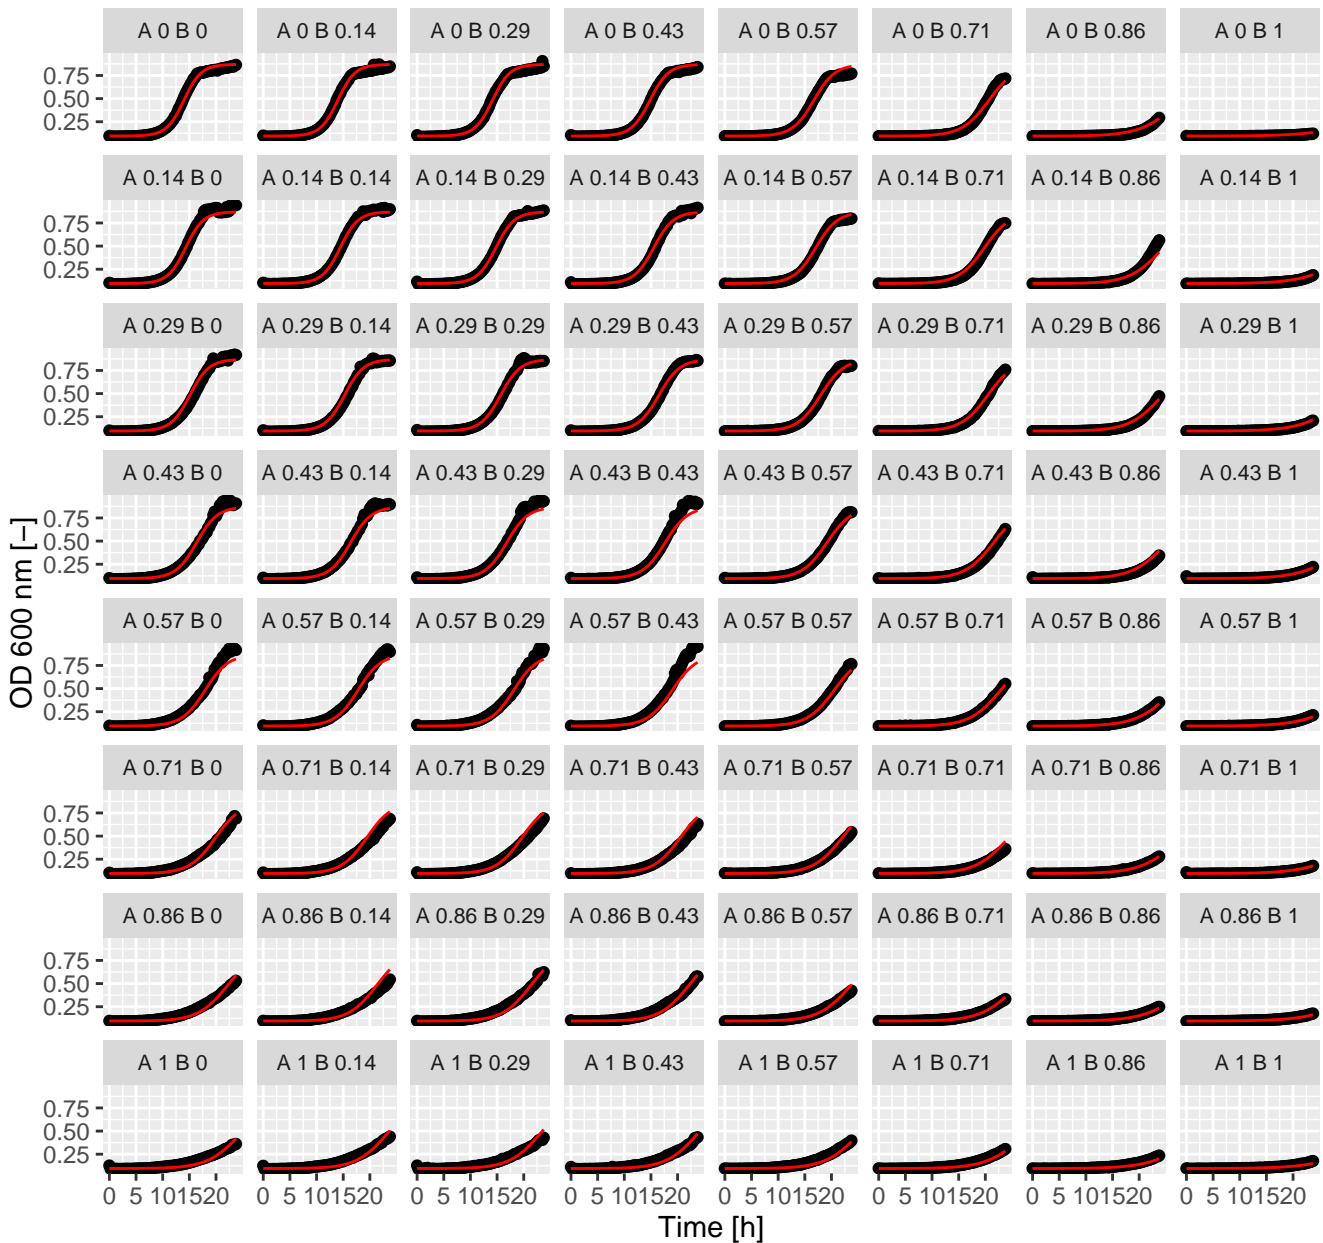

Rad.Tac (= Ax.Bx) exp. additivity (LA)  
 Int\_AB = 0 and Int\_BA = 0 at EC50

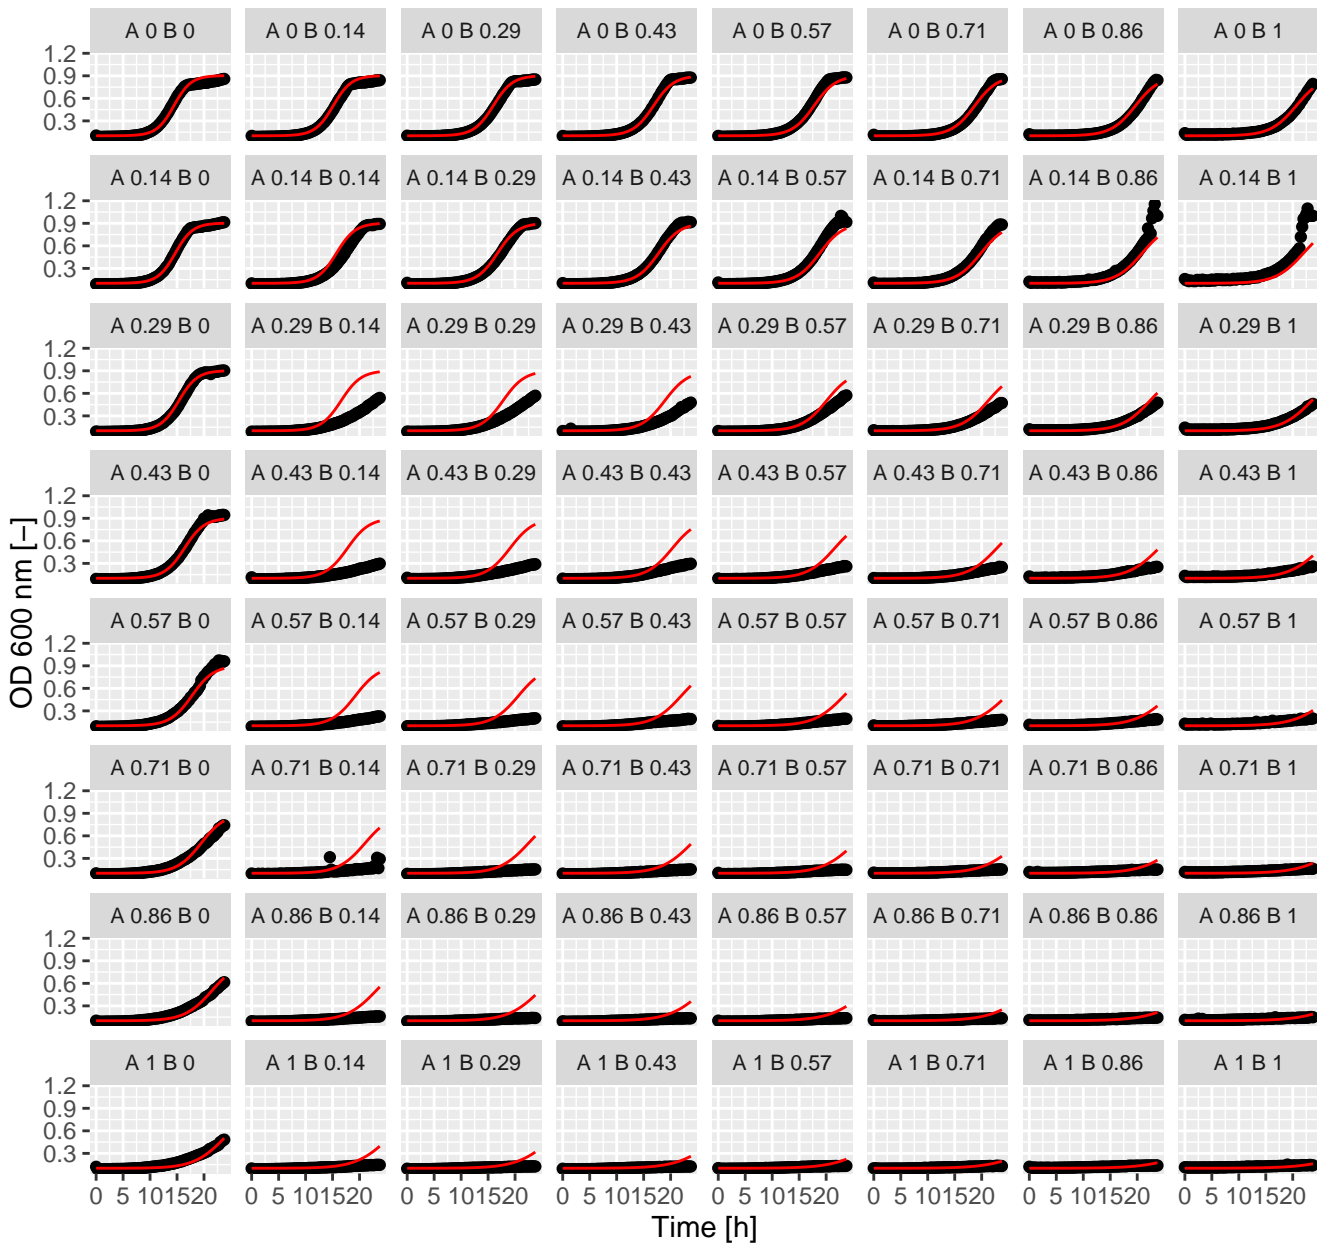

Rad.Tac (= Ax.Bx) full GPDI  
 Int\_AB = -0.63 and Int\_BA = 1.66 at EC50

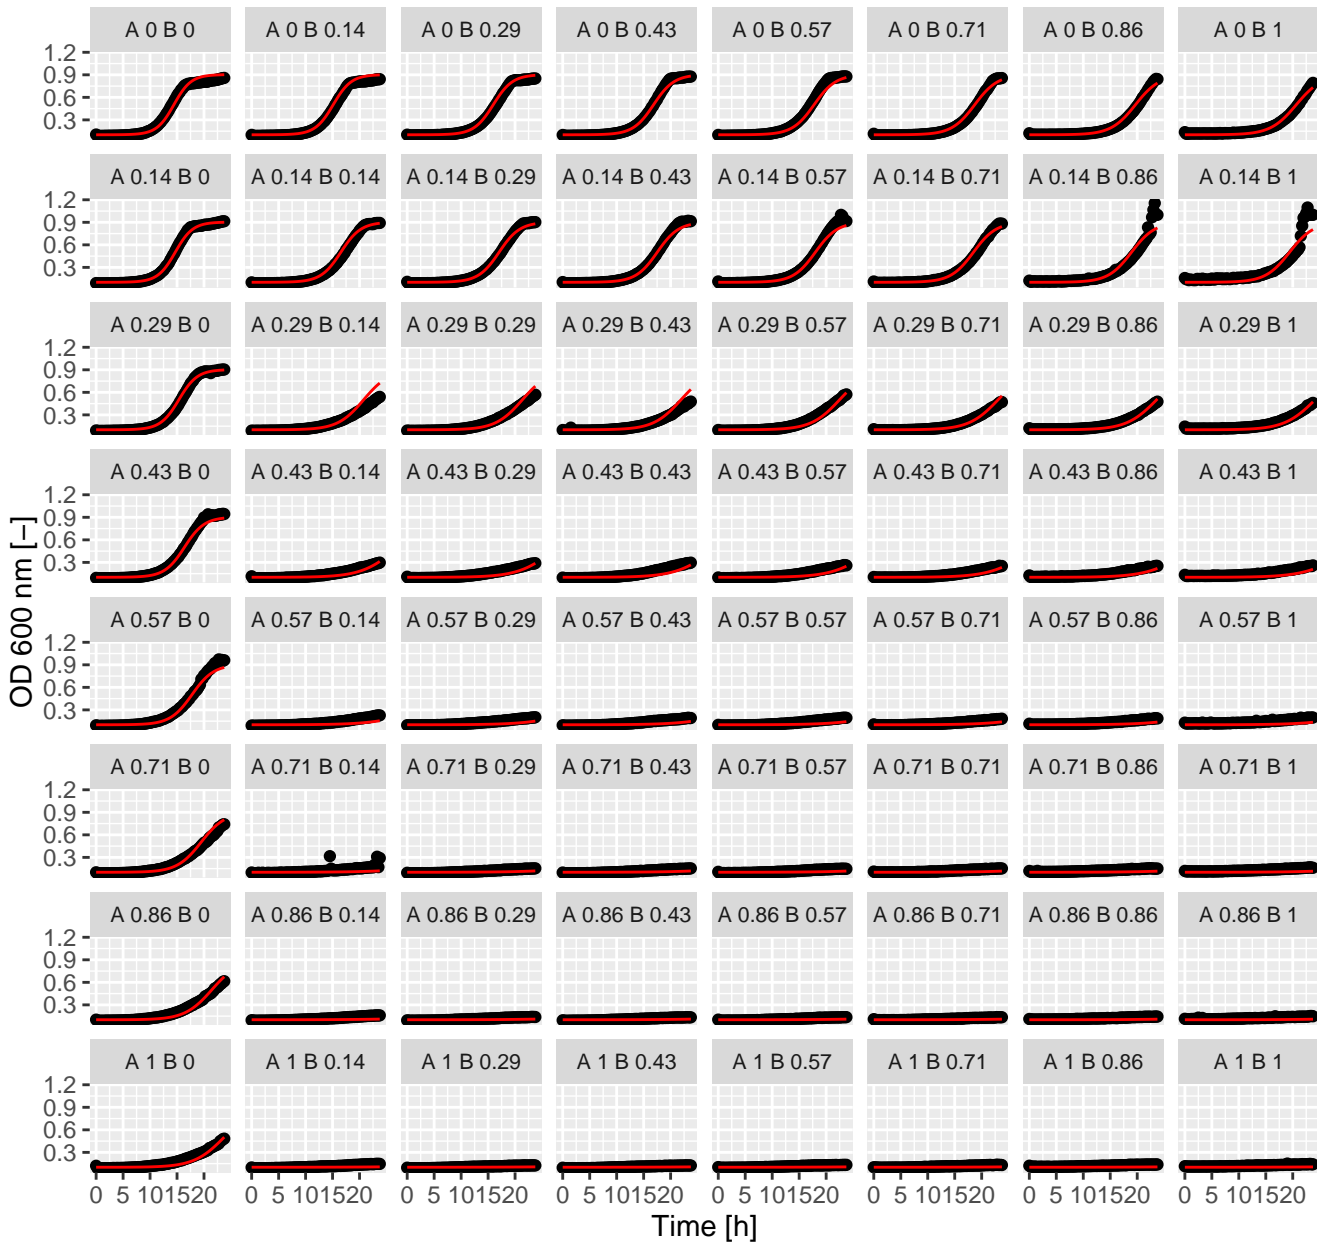



Rad.Ter (= Ax.Bx) exp. additivity (LA)  
Int\_AB = 0 and Int\_BA = 0 at EC50

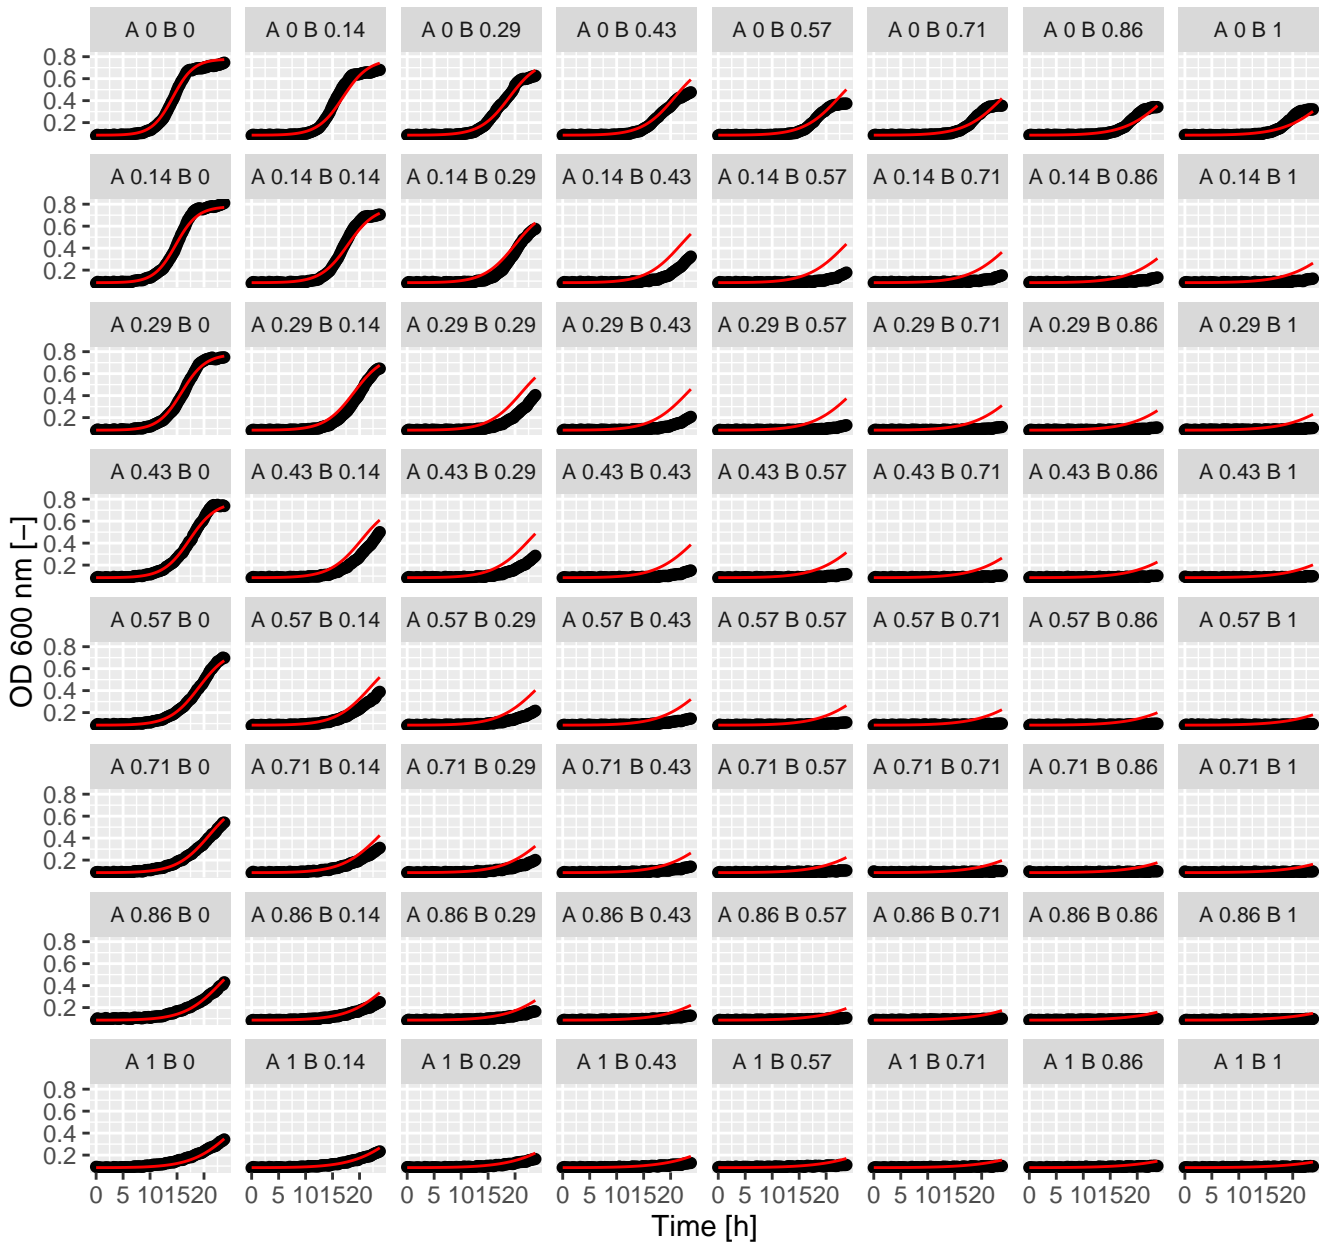

Rad.Ter (= Ax.Bx) full GPDI  
Int\_AB = -0.75 and Int\_BA = -0.15 at EC50

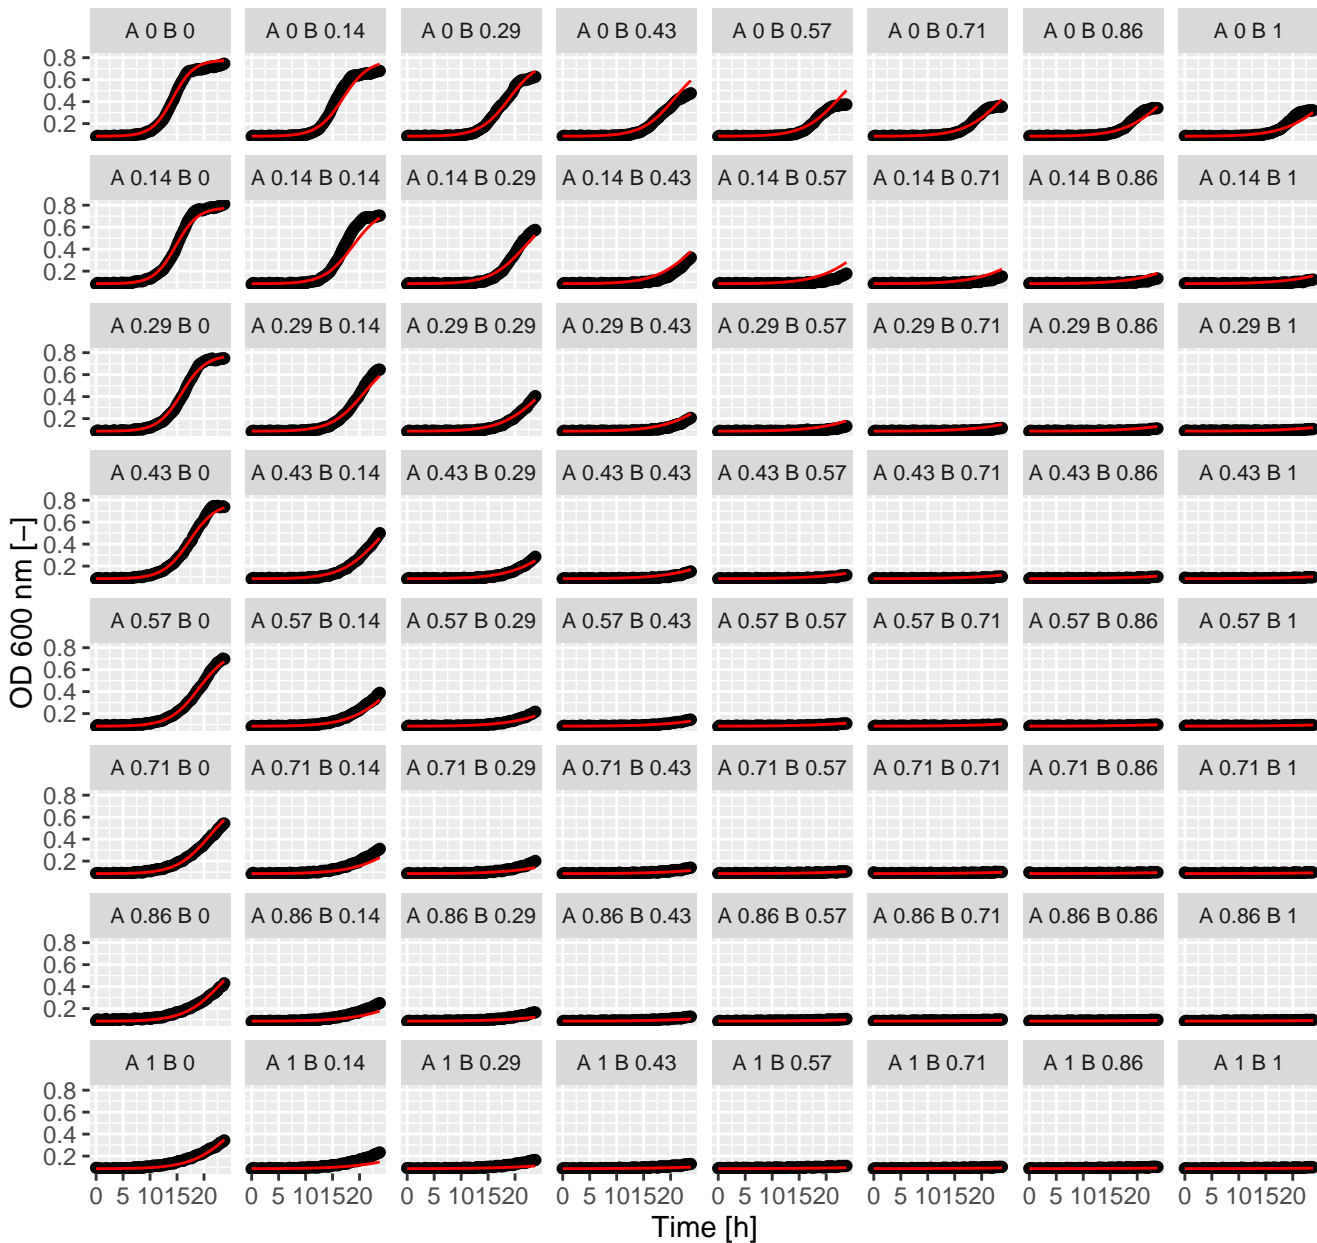

Rap.Rap (= Ax.Bx) exp. additivity (LA)  
 Int\_AB = 0 and Int\_BA = 0 at EC50

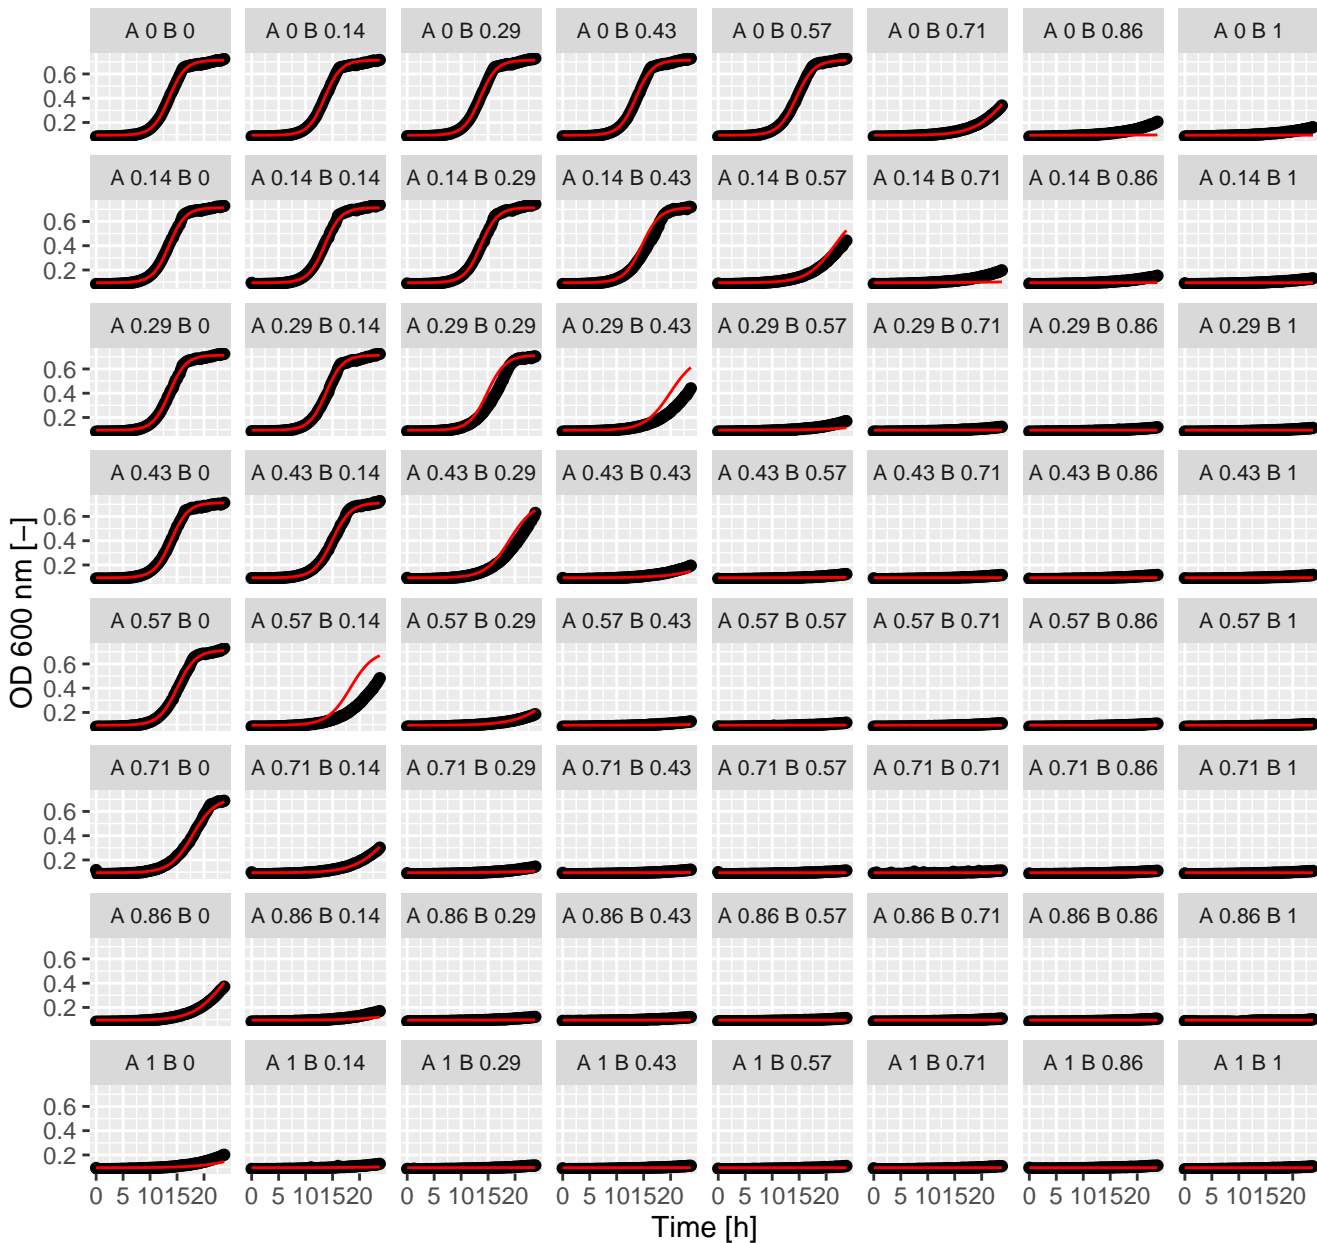

Rap.Rap (= Ax.Bx) full GPD1  
 Int\_AB = -0.1 and Int\_BA = 0 at EC50

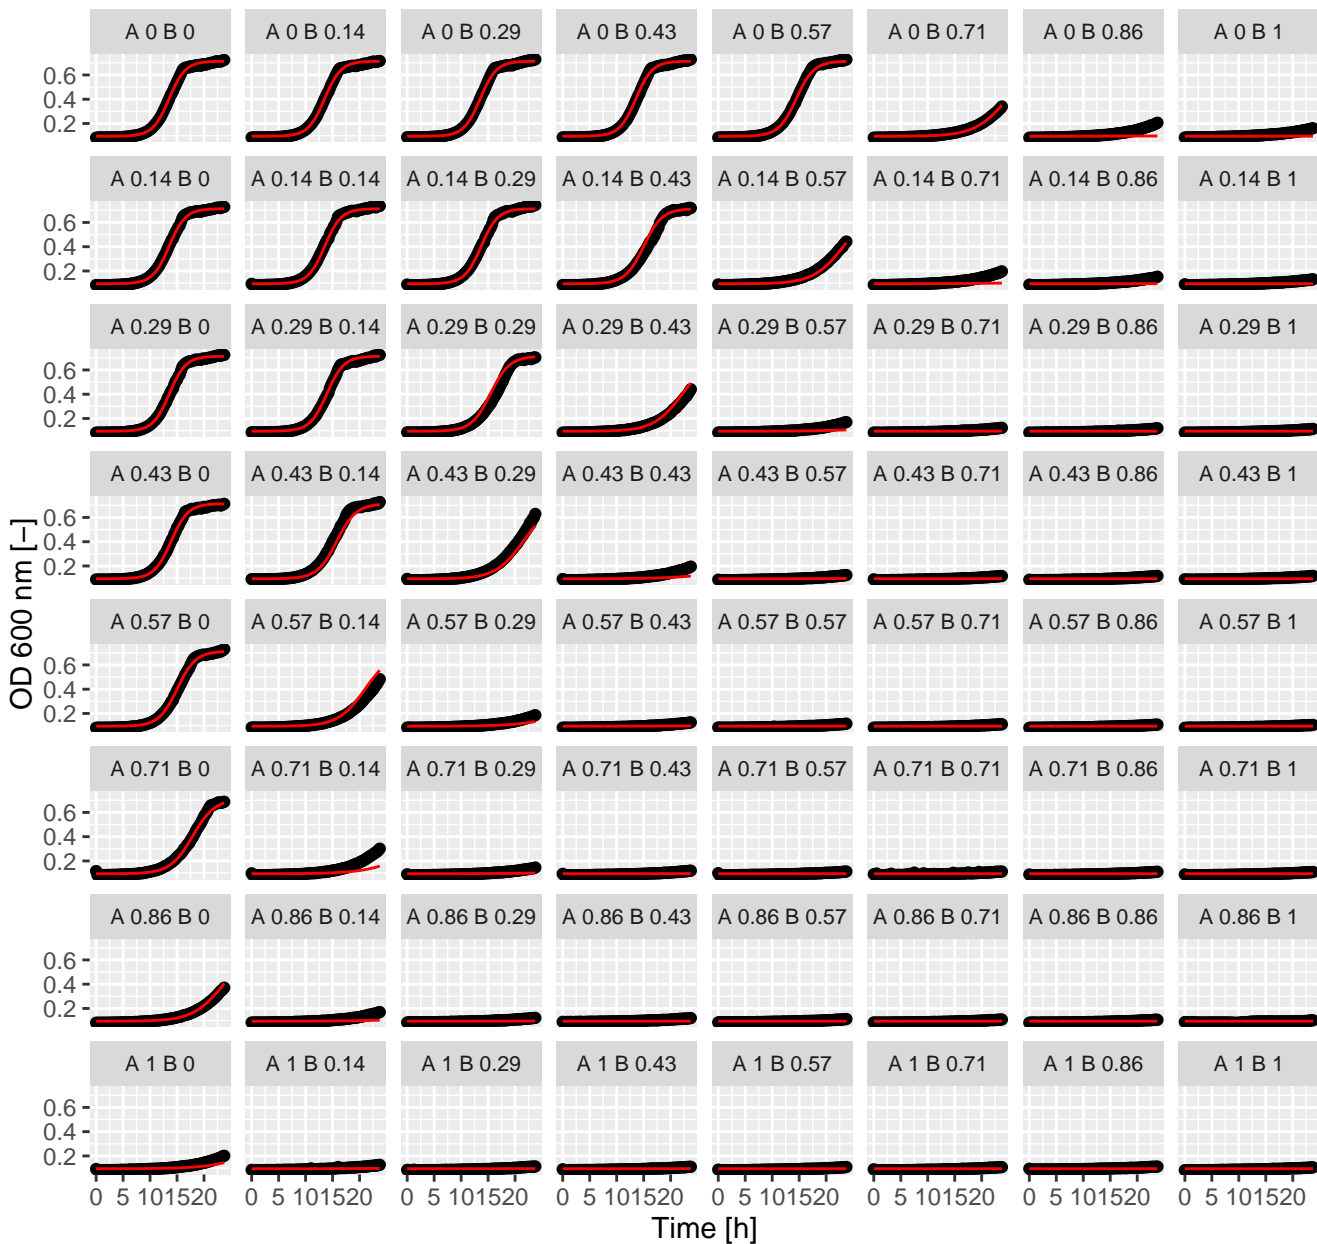

Rap.Sta (= Ax.Bx) exp. additivity (LA)  
 Int\_AB = 0 and Int\_BA = 0 at EC50

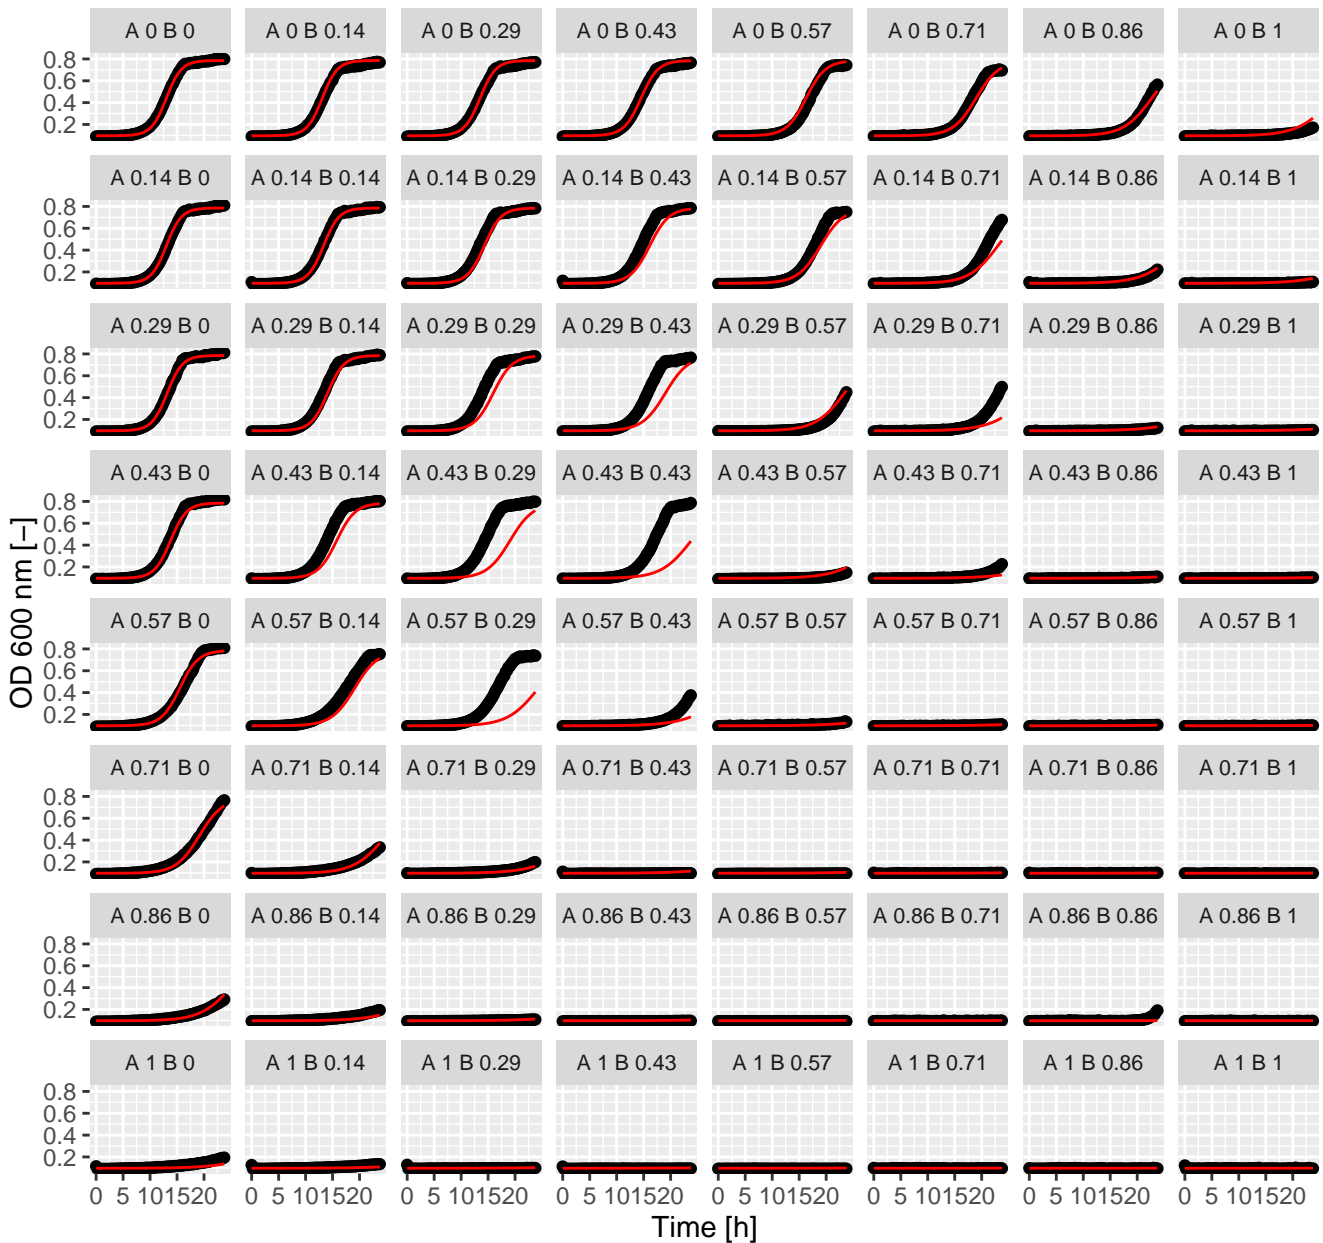

Rap.Sta (= Ax.Bx) full GPDI  
 Int\_AB = 0.23 and Int\_BA = 0.17 at EC50

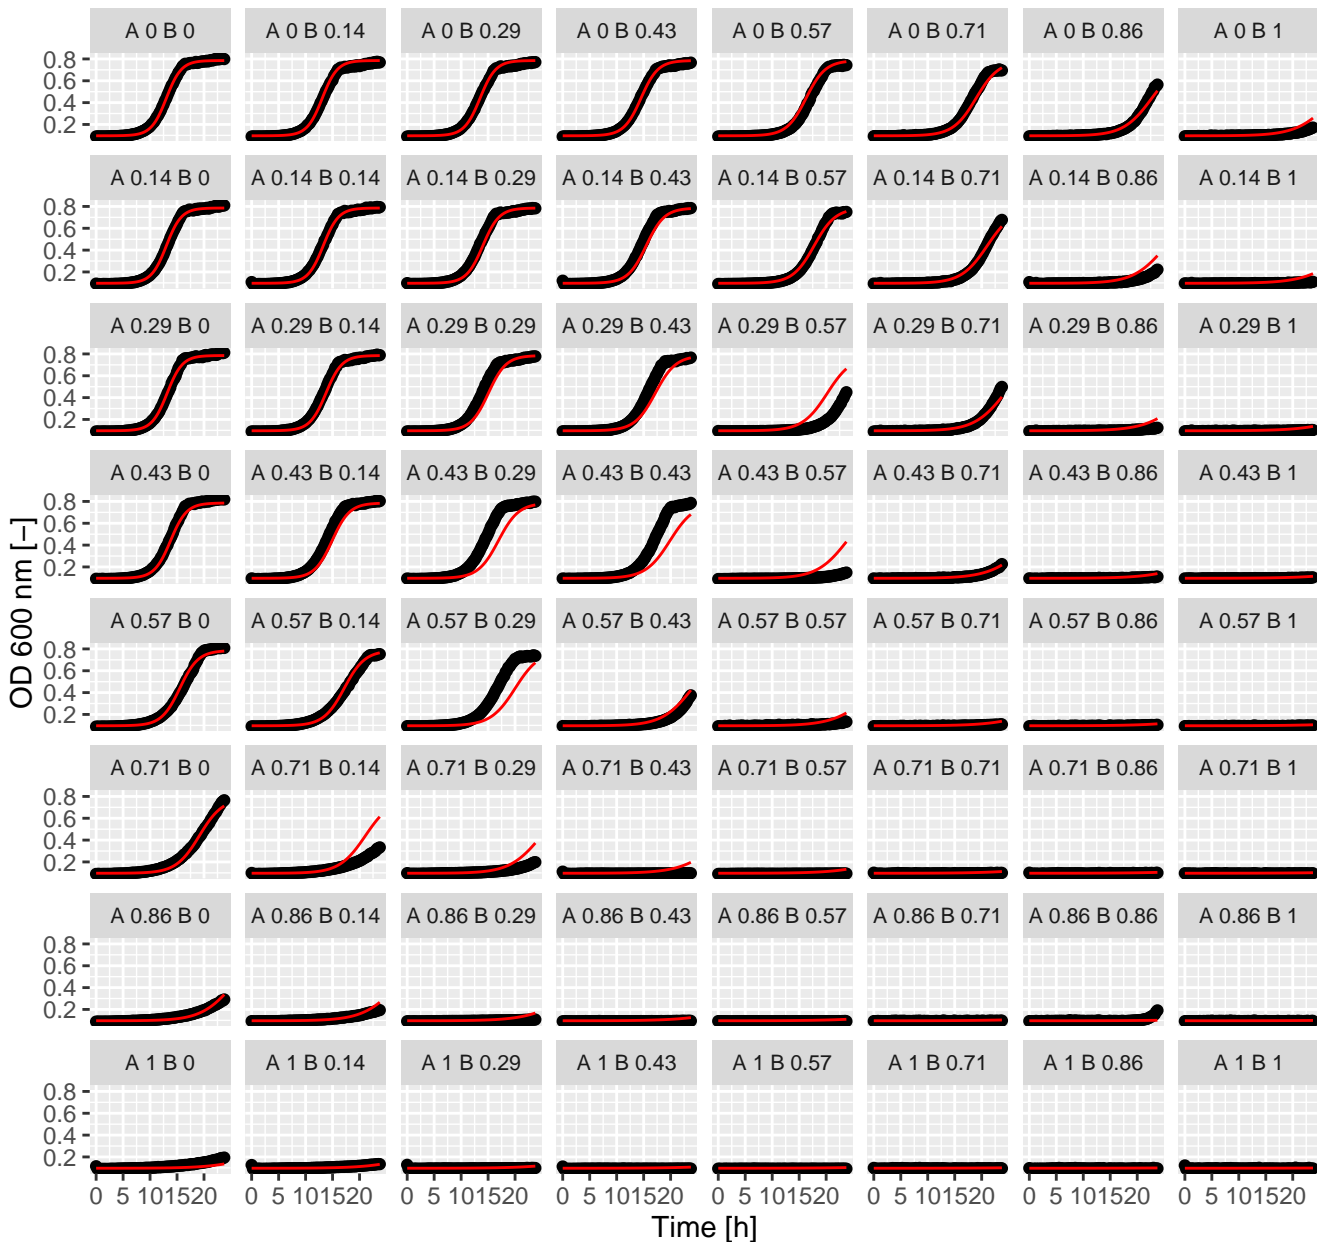

Rap.Tac (= Ax.Bx) exp. additivity (LA)  
 Int\_AB = 0 and Int\_BA = 0 at EC50

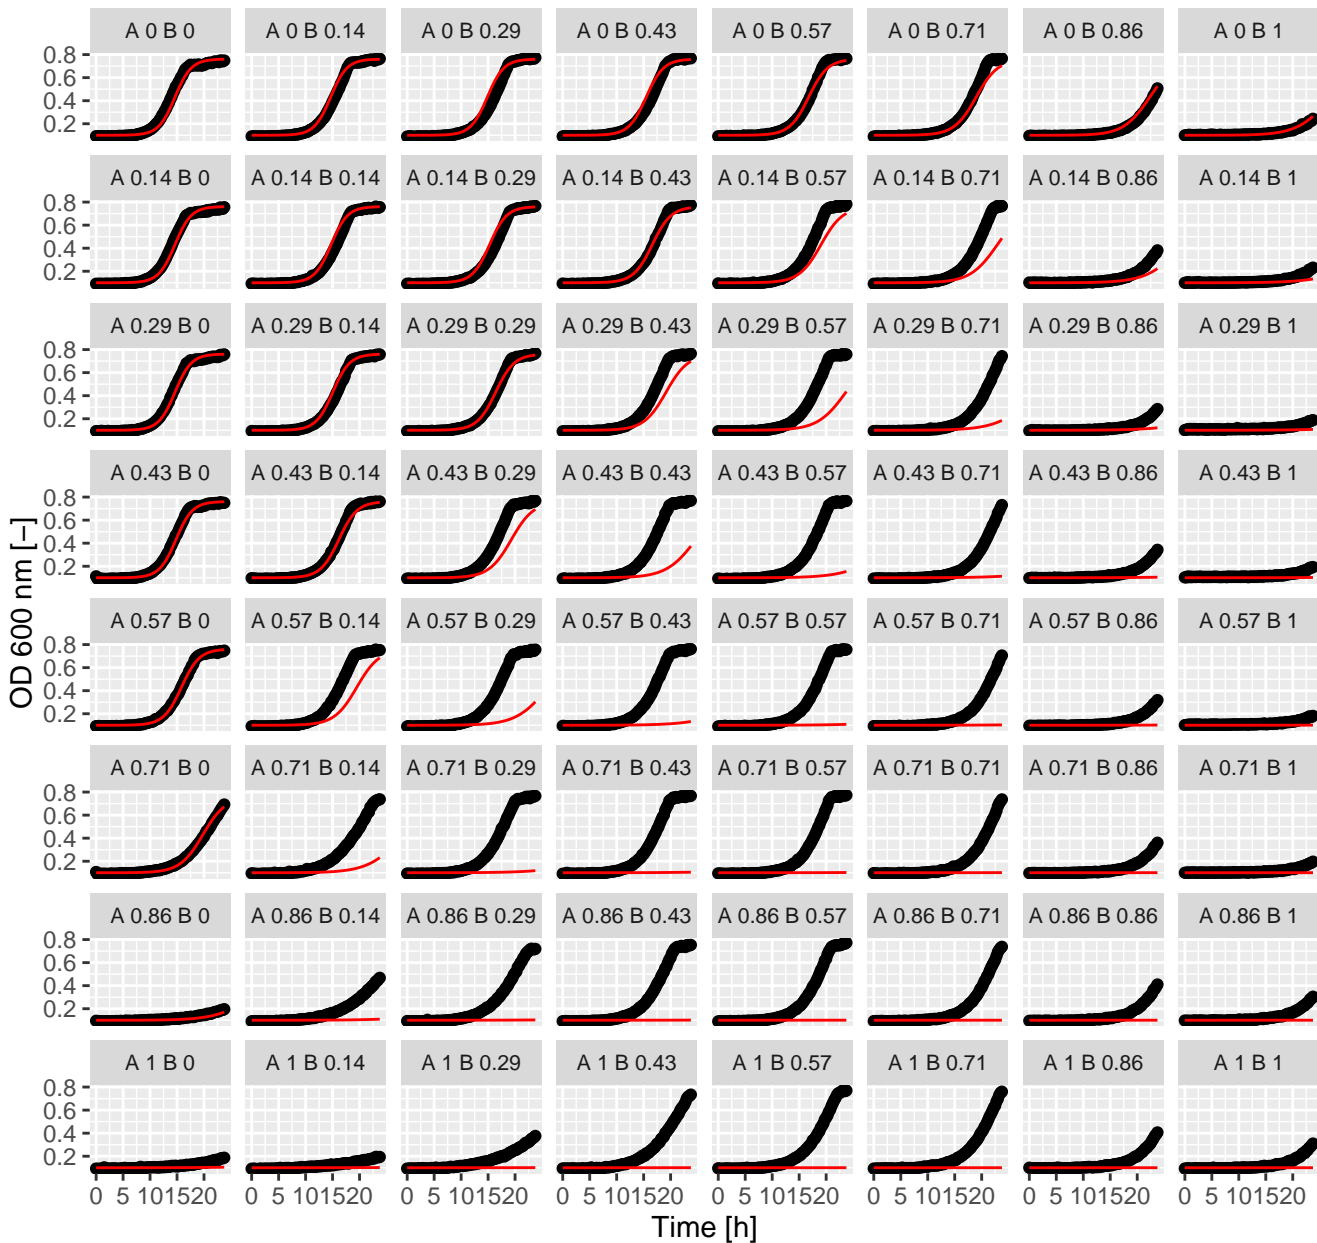

Rap.Tac (= Ax.Bx) full GPDI  
 Int\_AB = 2.85 and Int\_BA = 0.37 at EC50

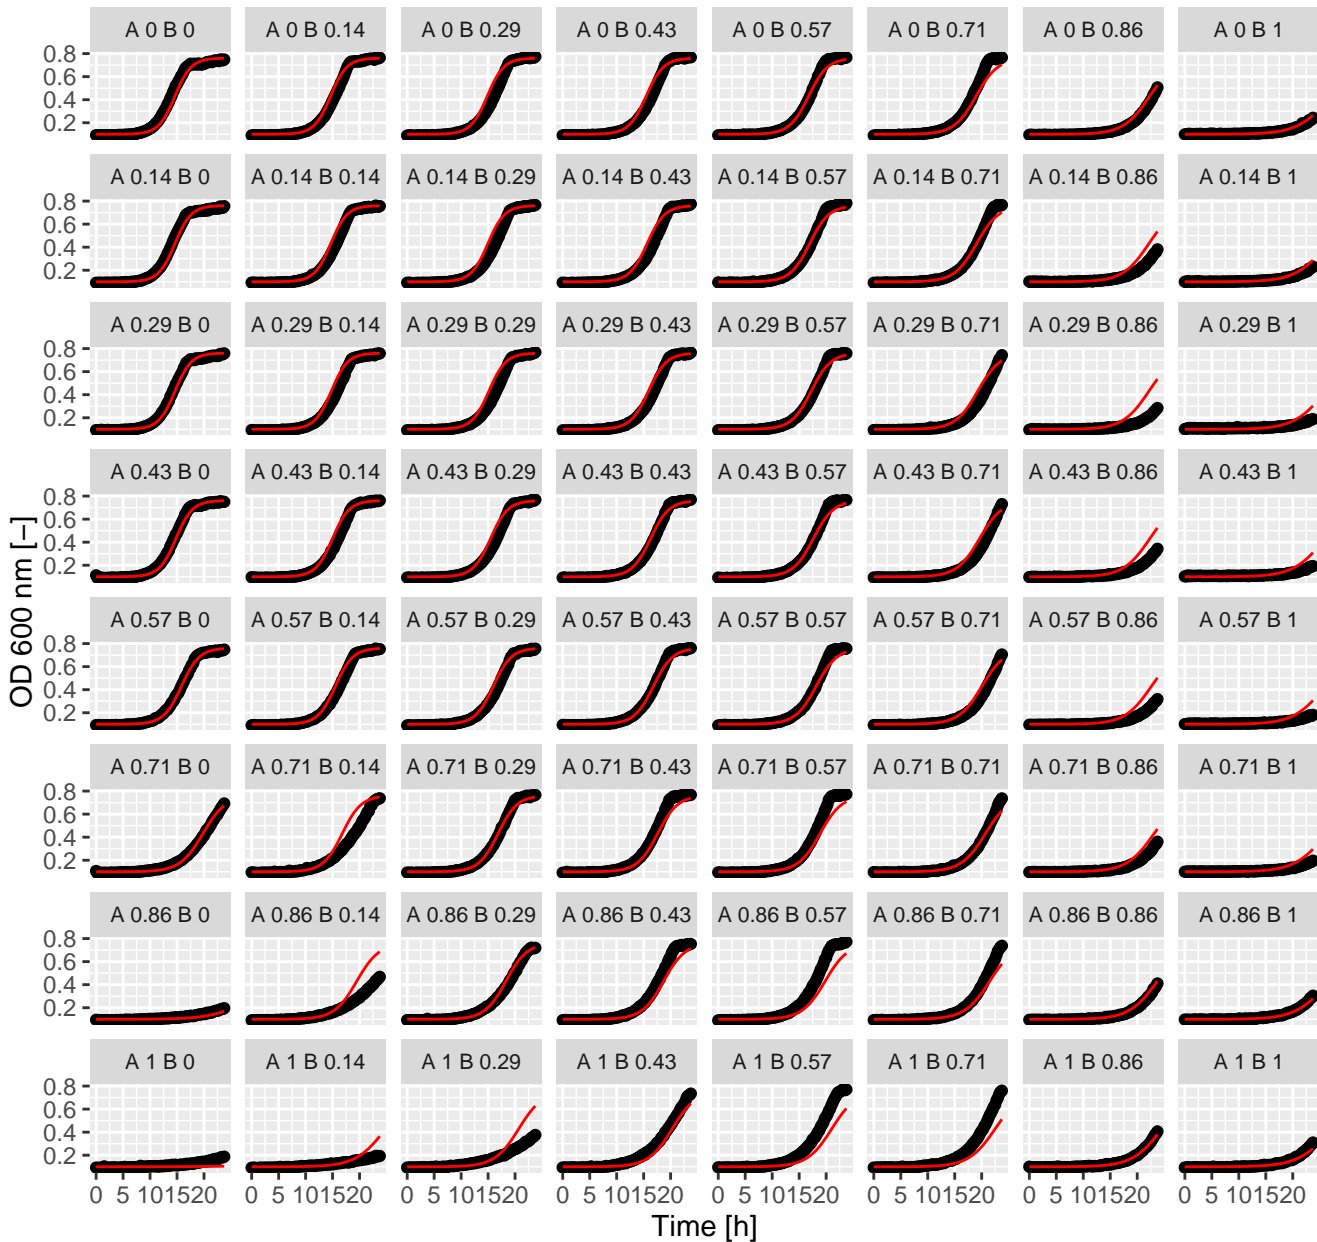



Rap.Ter (= Ax.Bx) exp. additivity (LA)  
 Int\_AB = 0 and Int\_BA = 0 at EC50

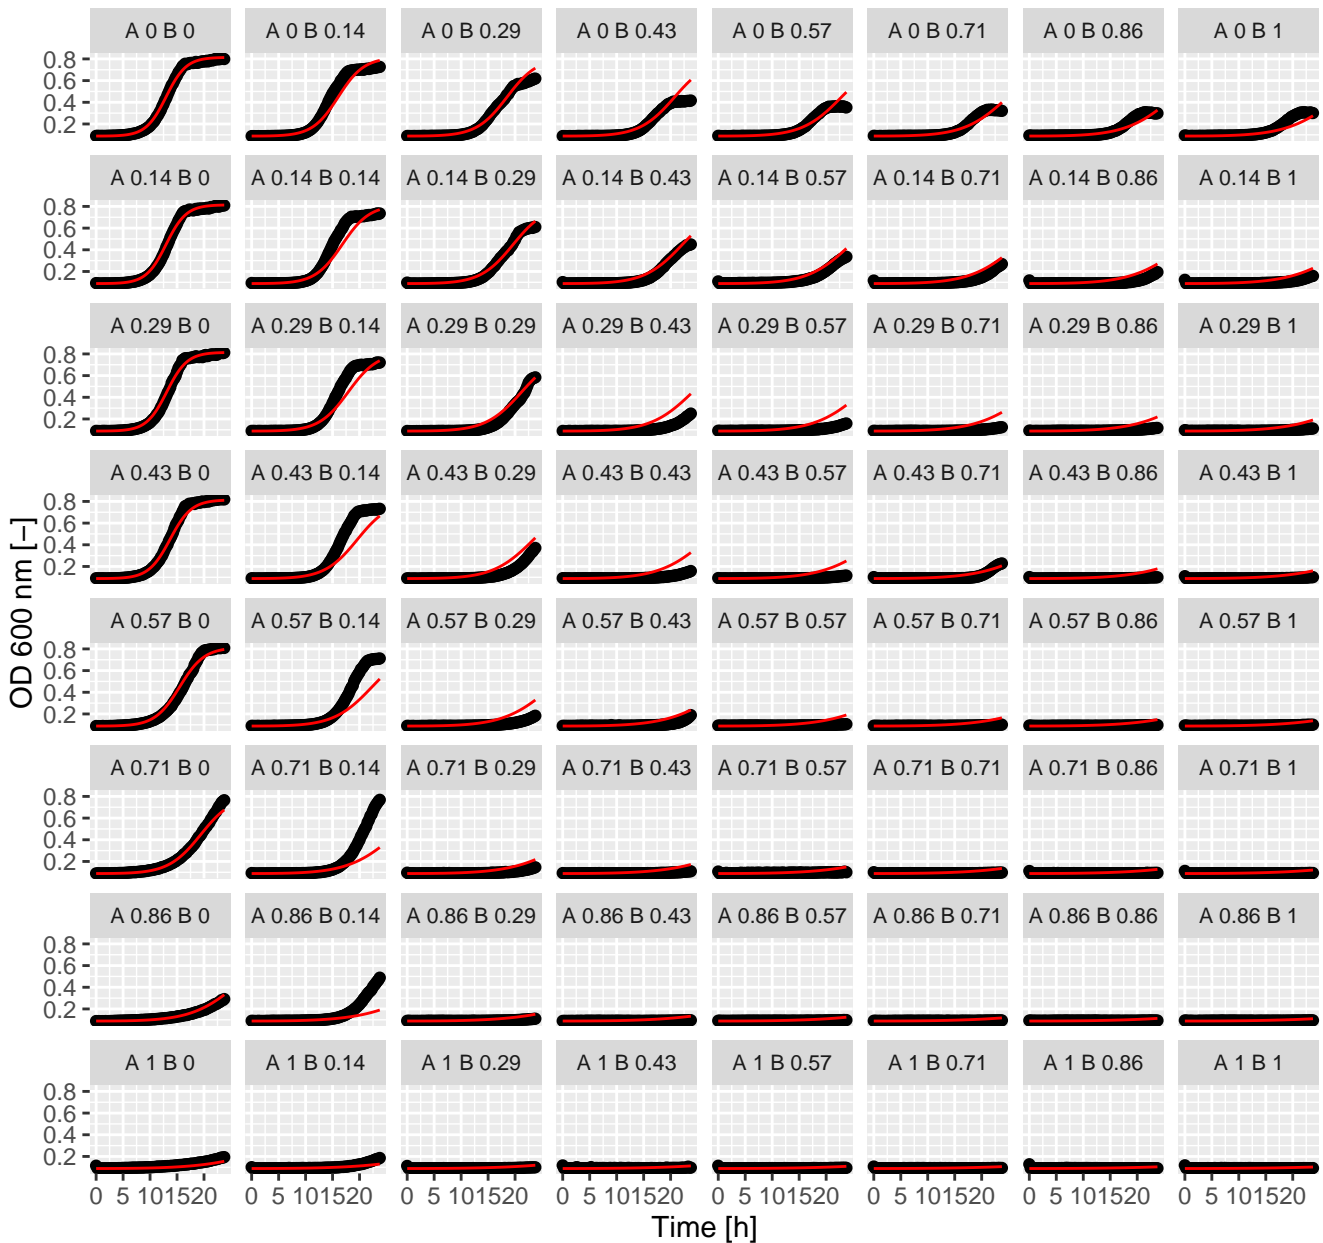

Rap.Ter (= Ax.Bx) full GPDI  
Int\_AB = -0.39 and Int\_BA = 0.83 at EC50

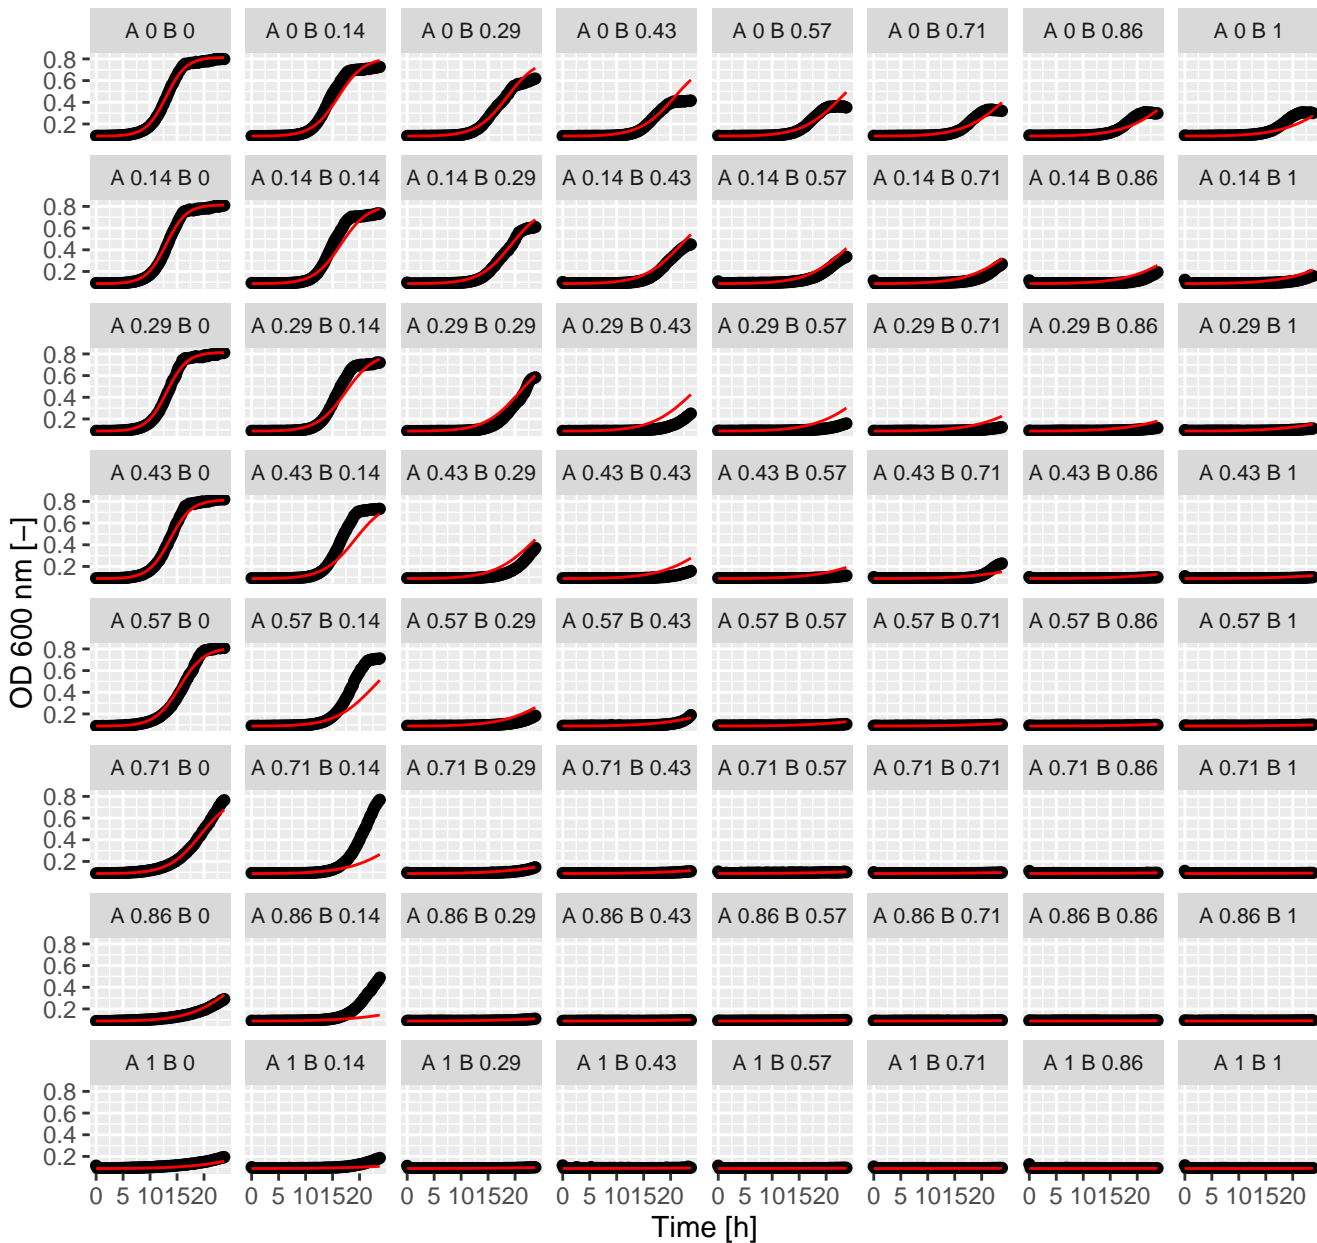

Rap.Tun (= Ax.Bx) exp. additivity (LA)  
Int\_AB = 0 and Int\_BA = 0 at EC50

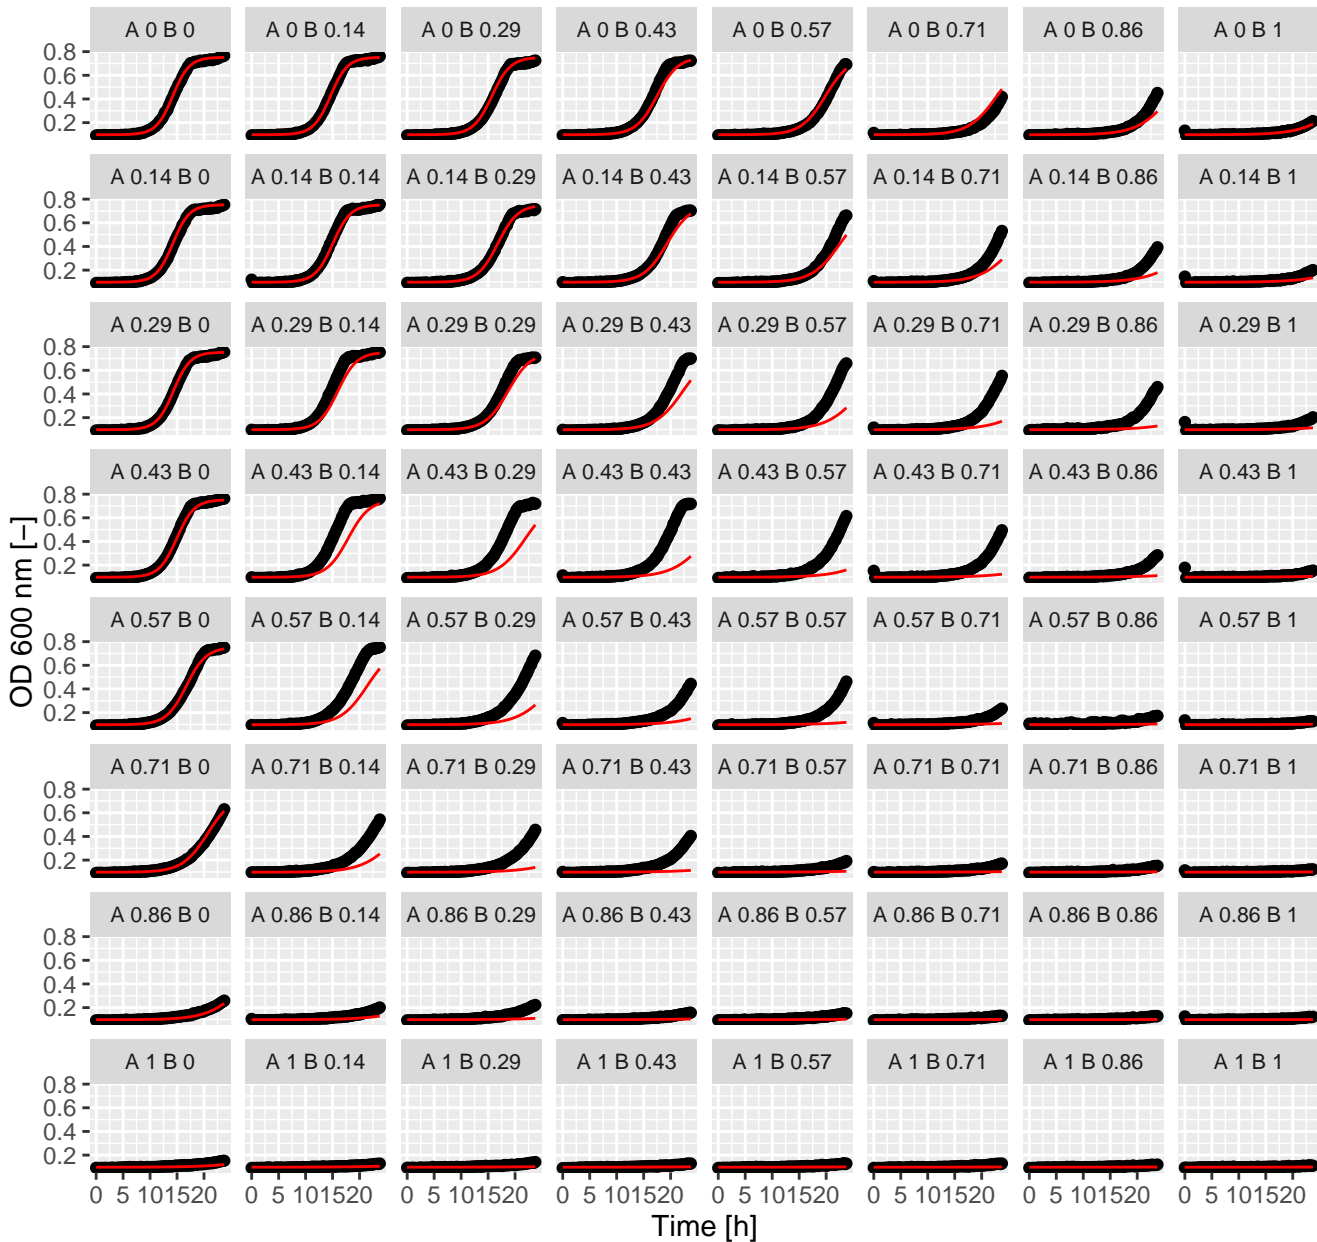

Rap.Tun (= Ax.Bx) full GPDI  
 Int\_AB = 0.31 and Int\_BA = 1.09 at EC50

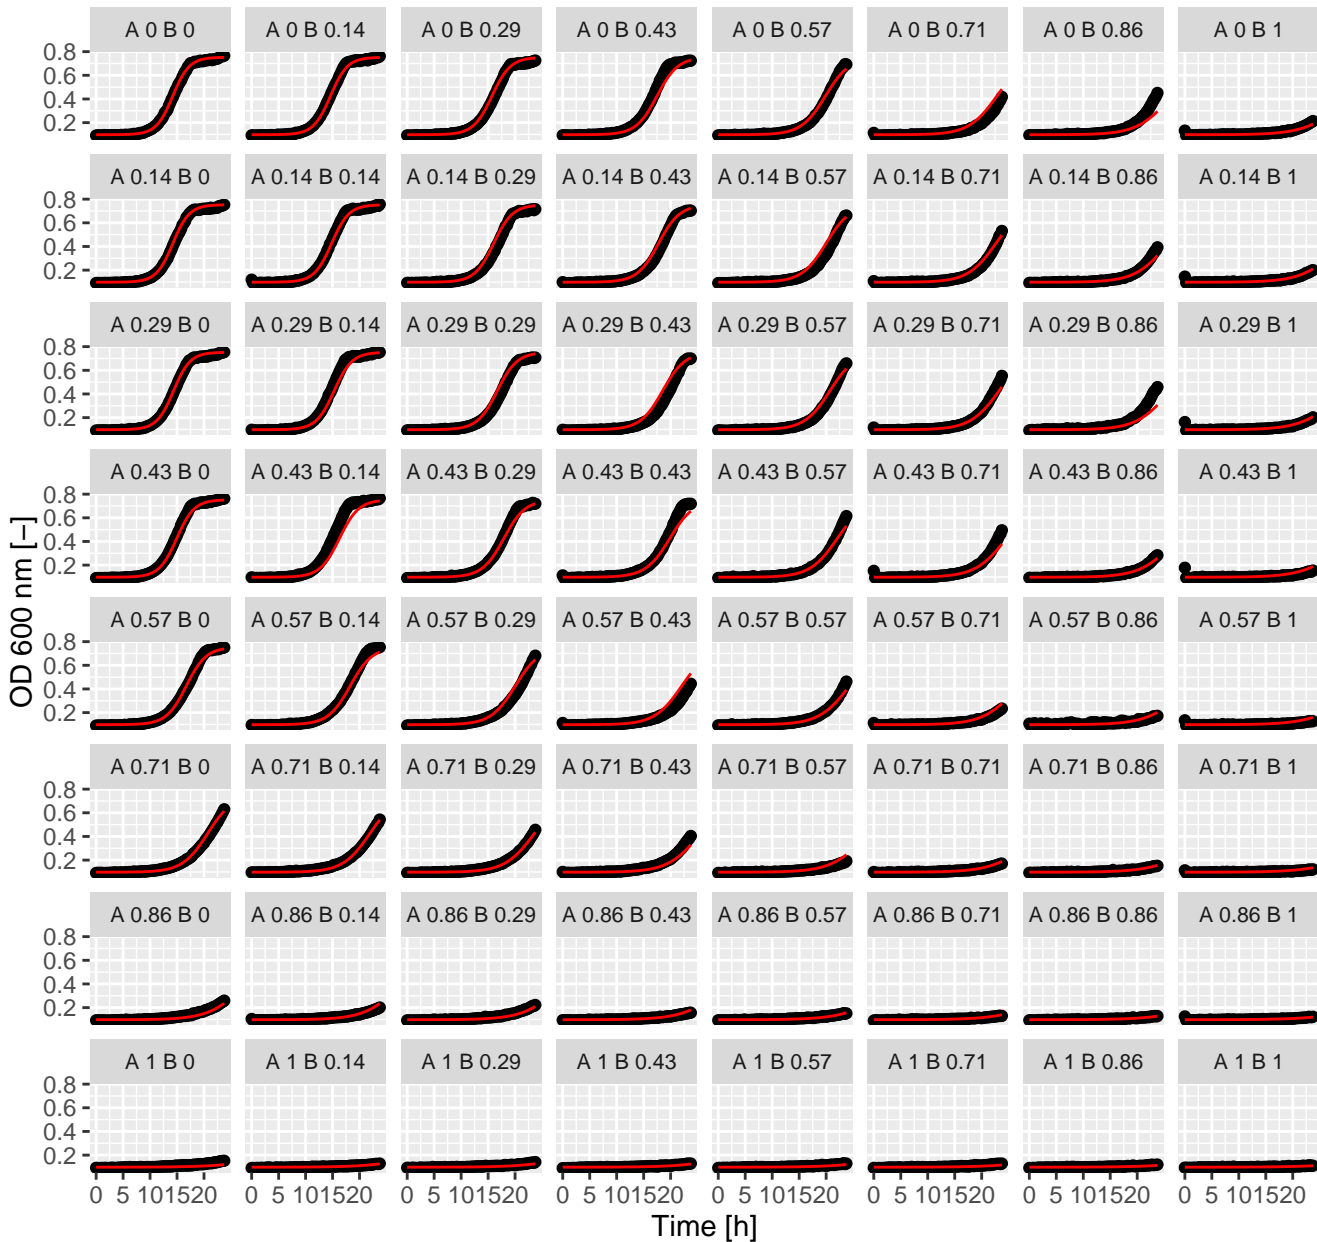

Sta.Sta (= Ax.Bx) exp. additivity (LA)  
 Int\_AB = 0 and Int\_BA = 0 at EC50

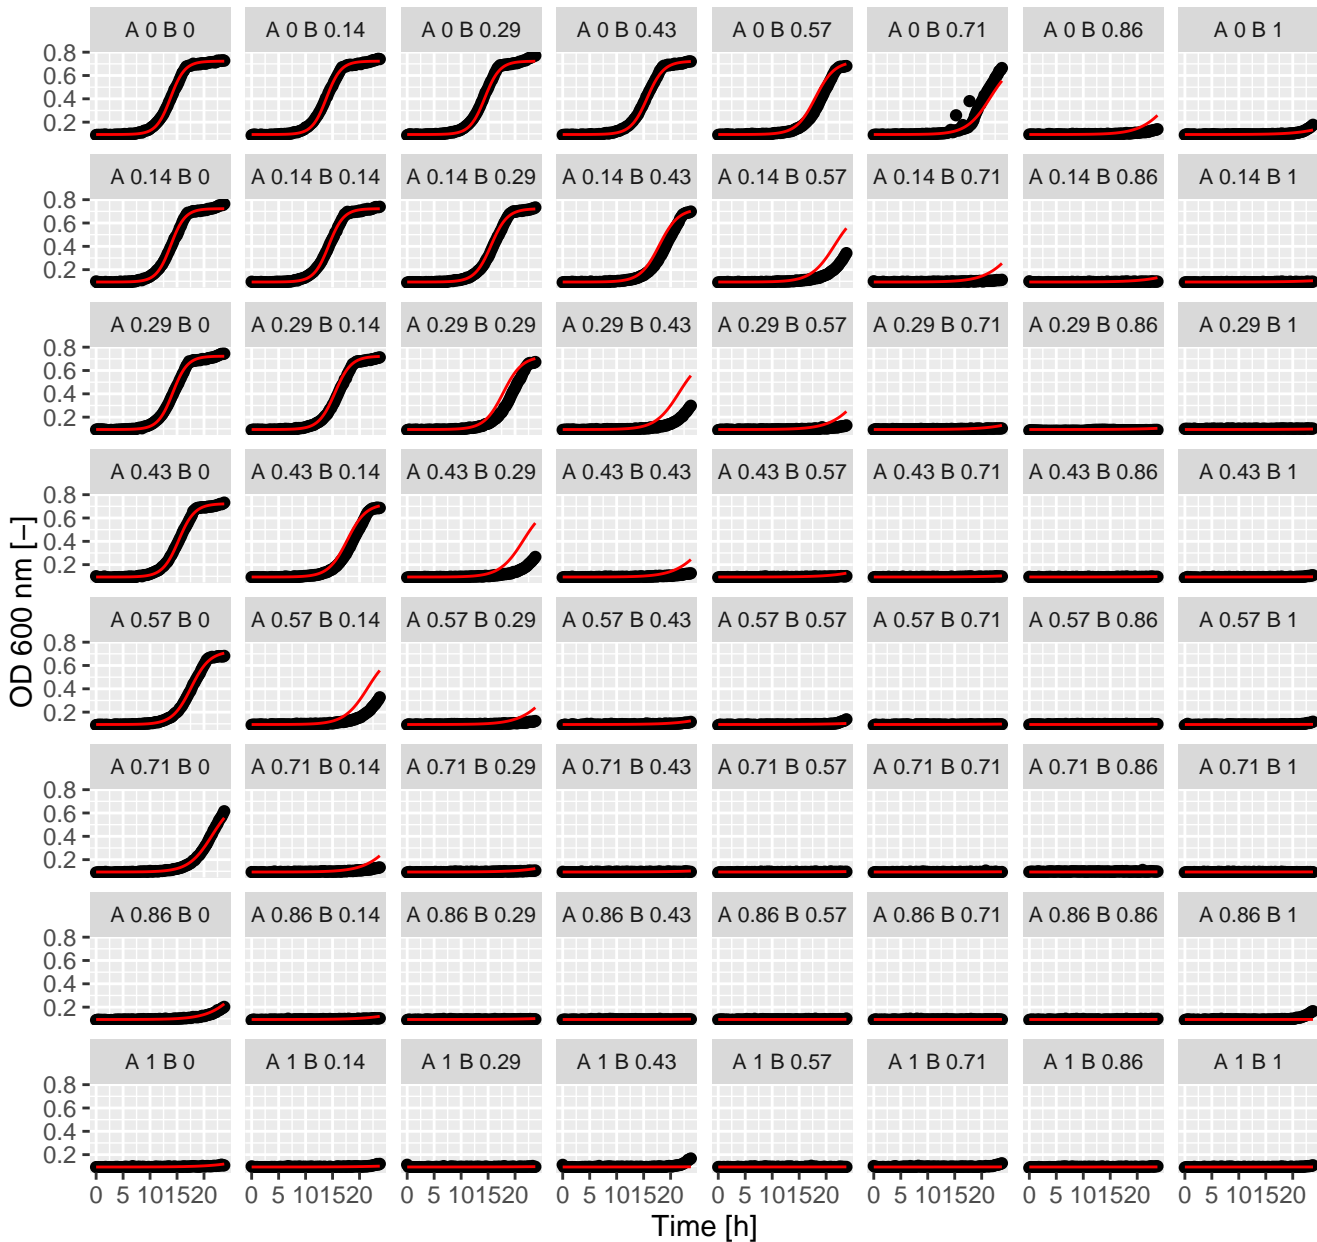

Sta.Sta (= Ax.Bx) full GPDI  
 Int\_AB = -0.49 and Int\_BA = 0.11 at EC50

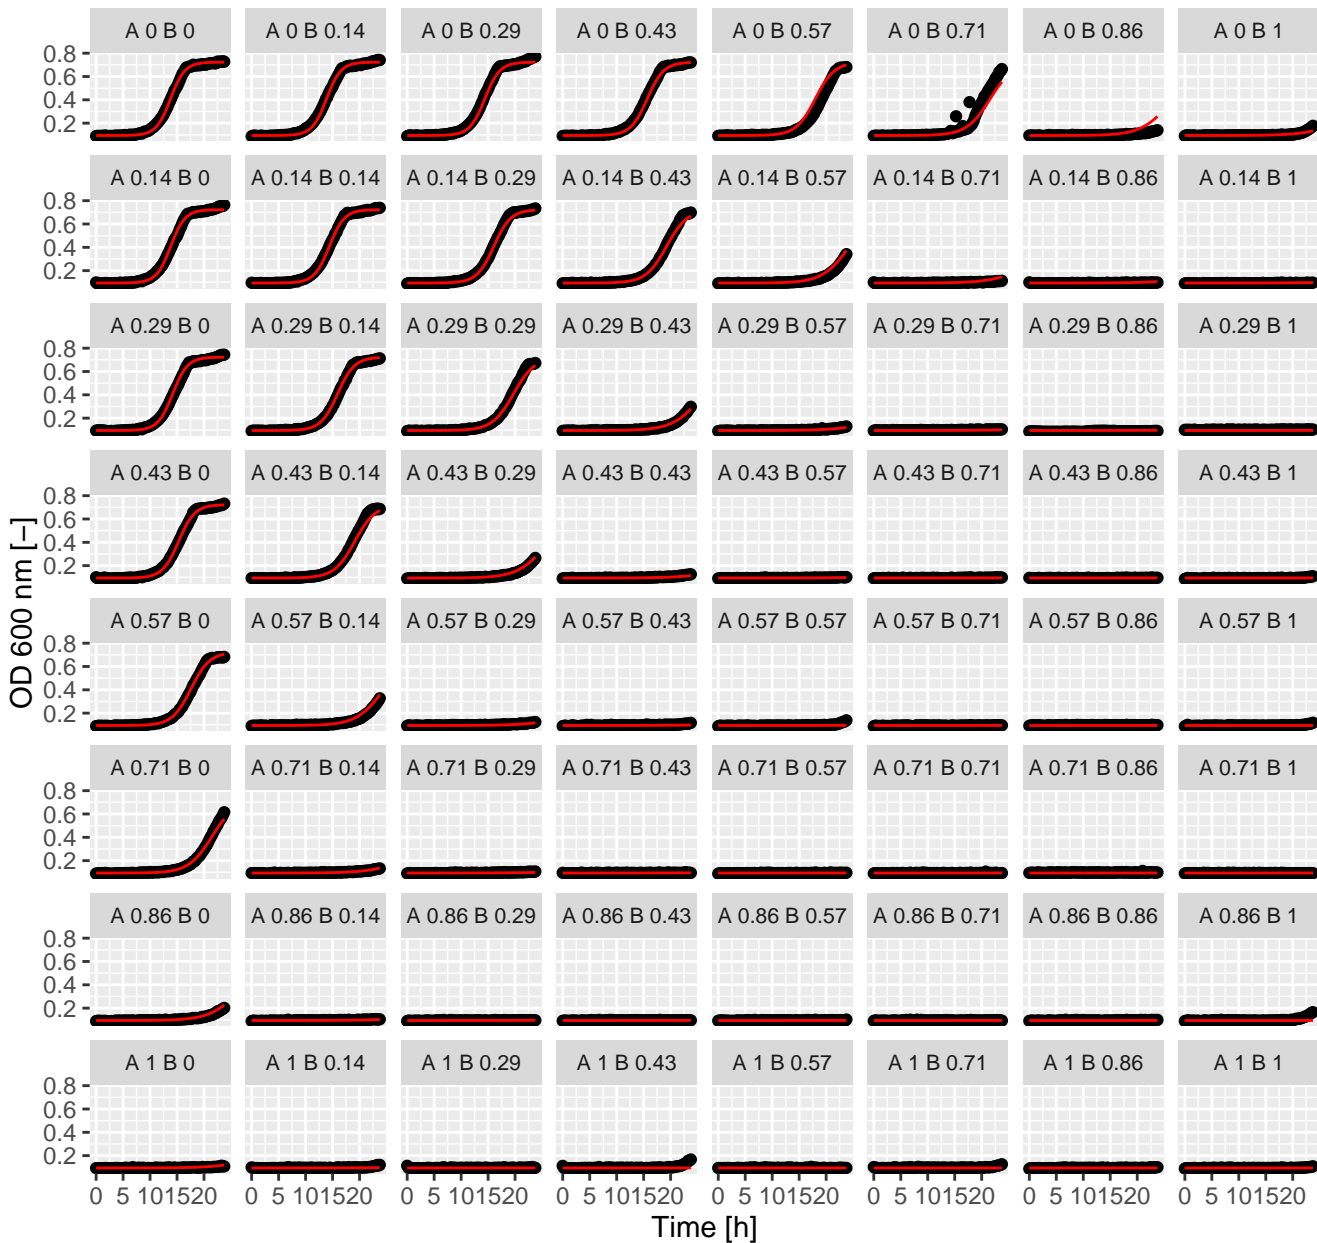

Sta.Tac (= Ax.Bx) exp. additivity (LA)  
 Int\_AB = 0 and Int\_BA = 0 at EC50

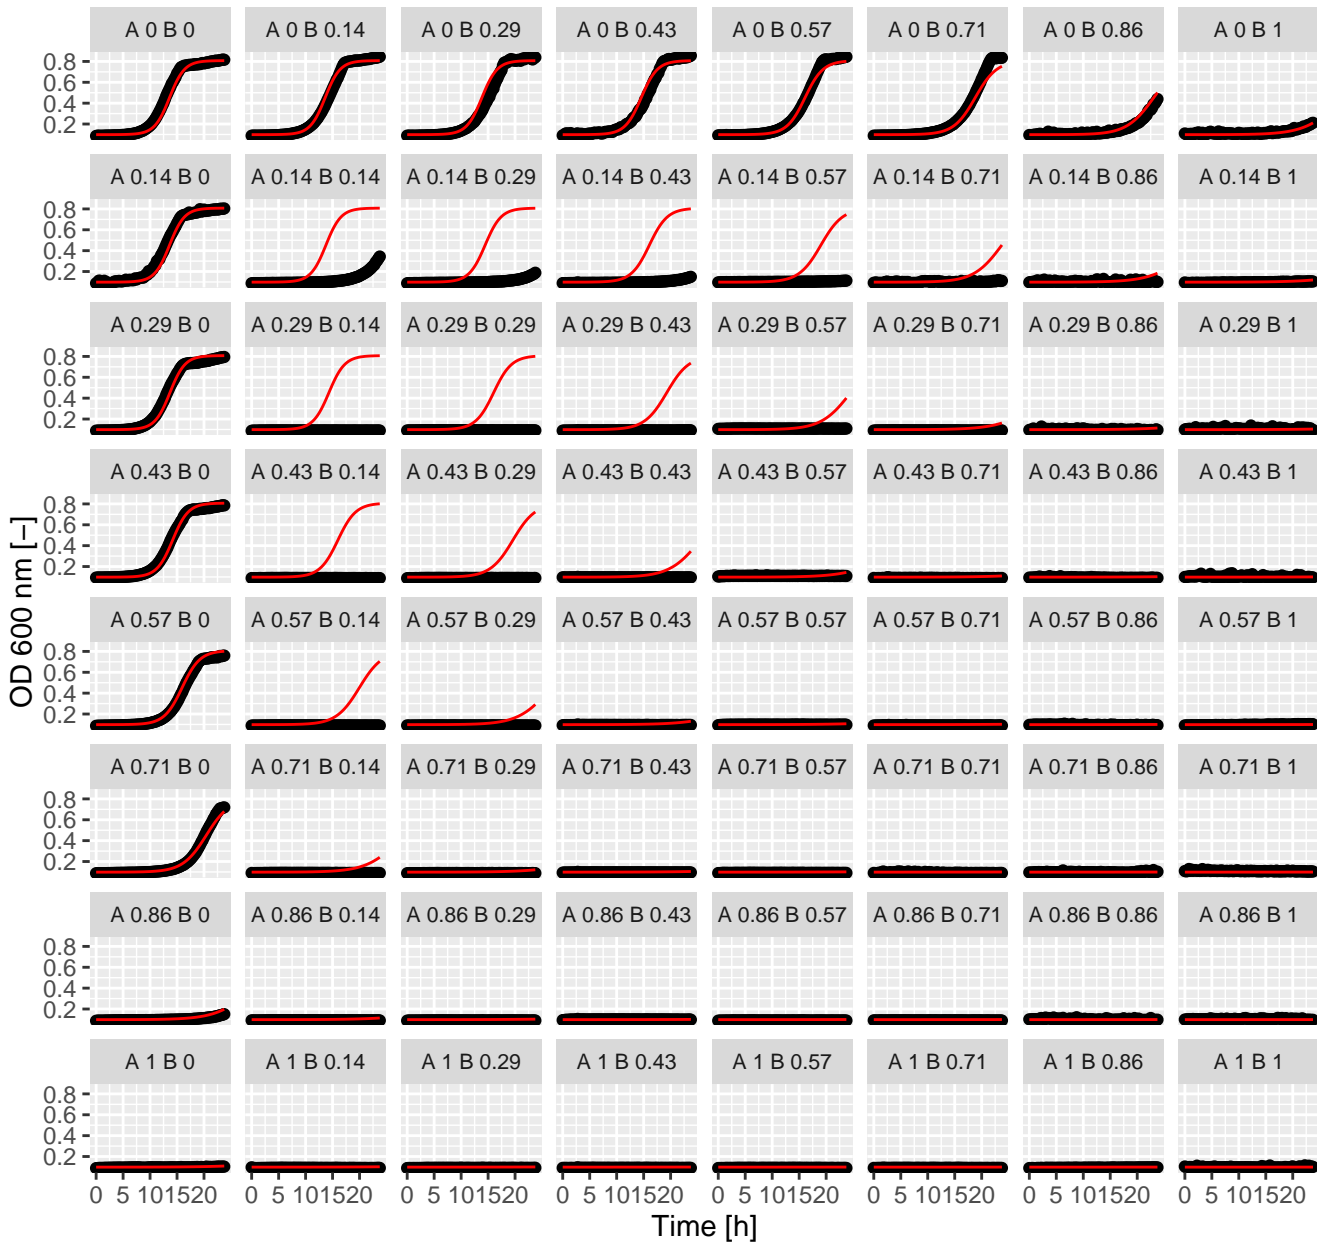

Sta.Tac (= Ax.Bx) full GPDI  
Int\_AB = -0.81 and Int\_BA = 0.13 at EC50

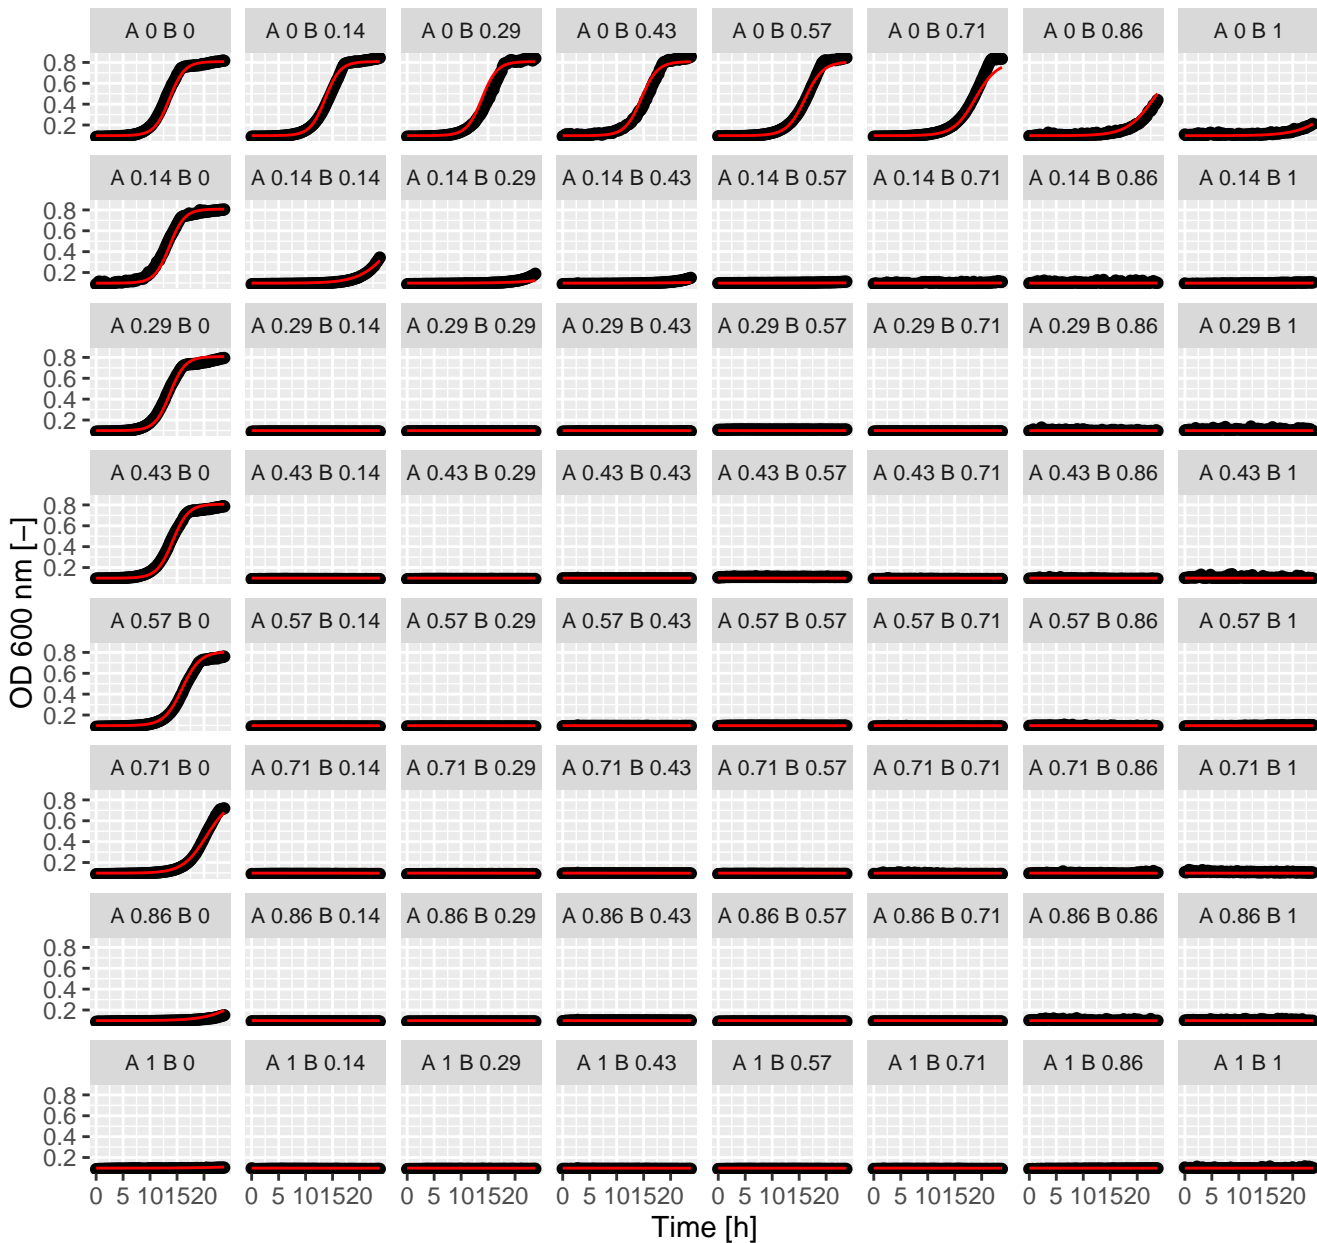



Sta.Tam (= Ax.Bx) exp. additivity (LA)  
Int\_AB = 0 and Int\_BA = 0 at EC50

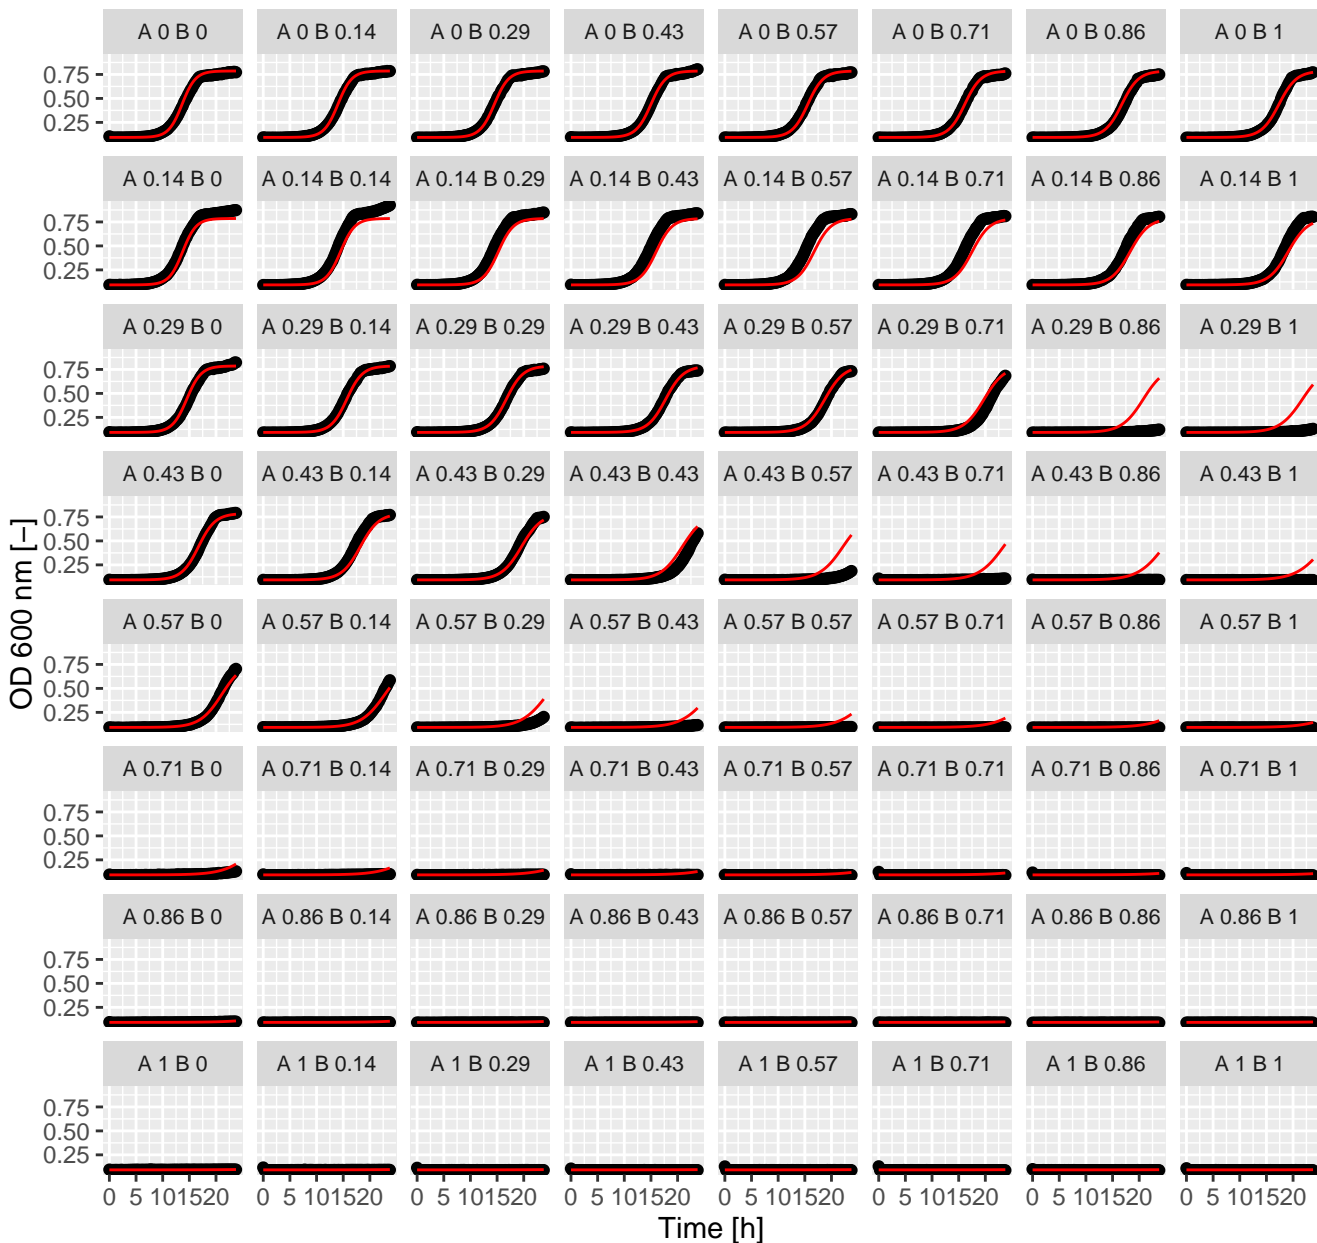

Sta.Tam (= Ax.Bx) full GPDI  
Int\_AB = -0.75 and Int\_BA = 4.88 at EC50

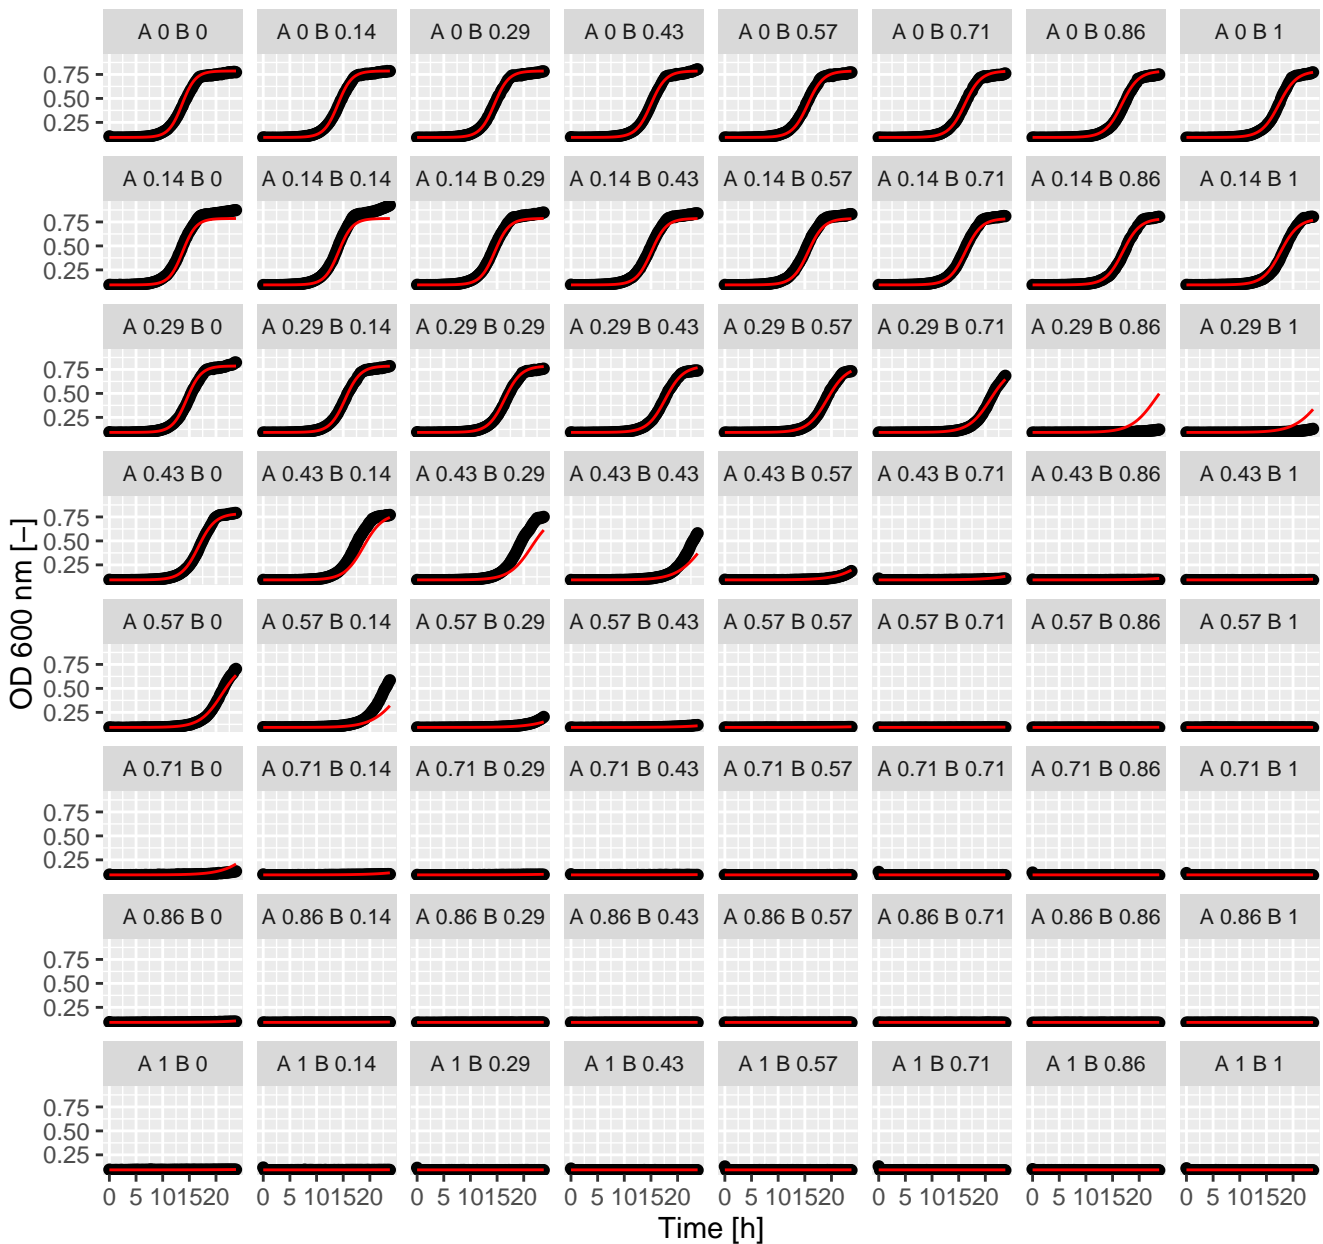

Sta.Ter (= Ax.Bx) exp. additivity (LA)  
 Int\_AB = 0 and Int\_BA = 0 at EC50

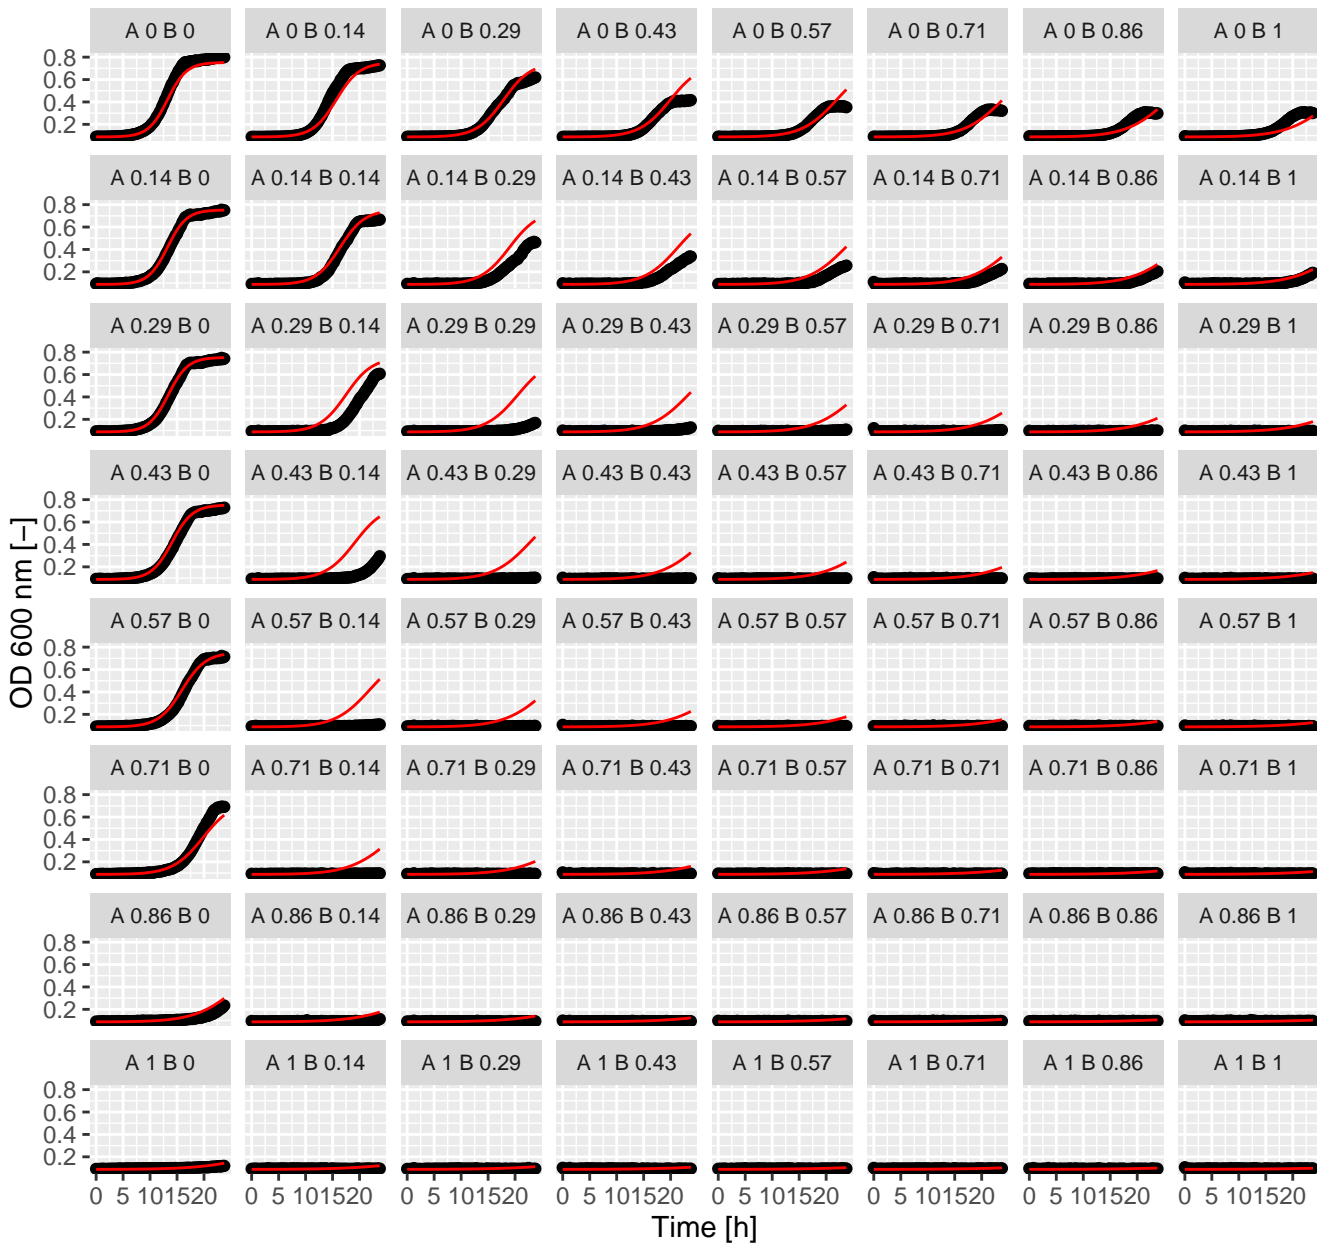

Sta.Ter (= Ax.Bx) full GPDI  
Int\_AB = -0.7 and Int\_BA = -0.02 at EC50

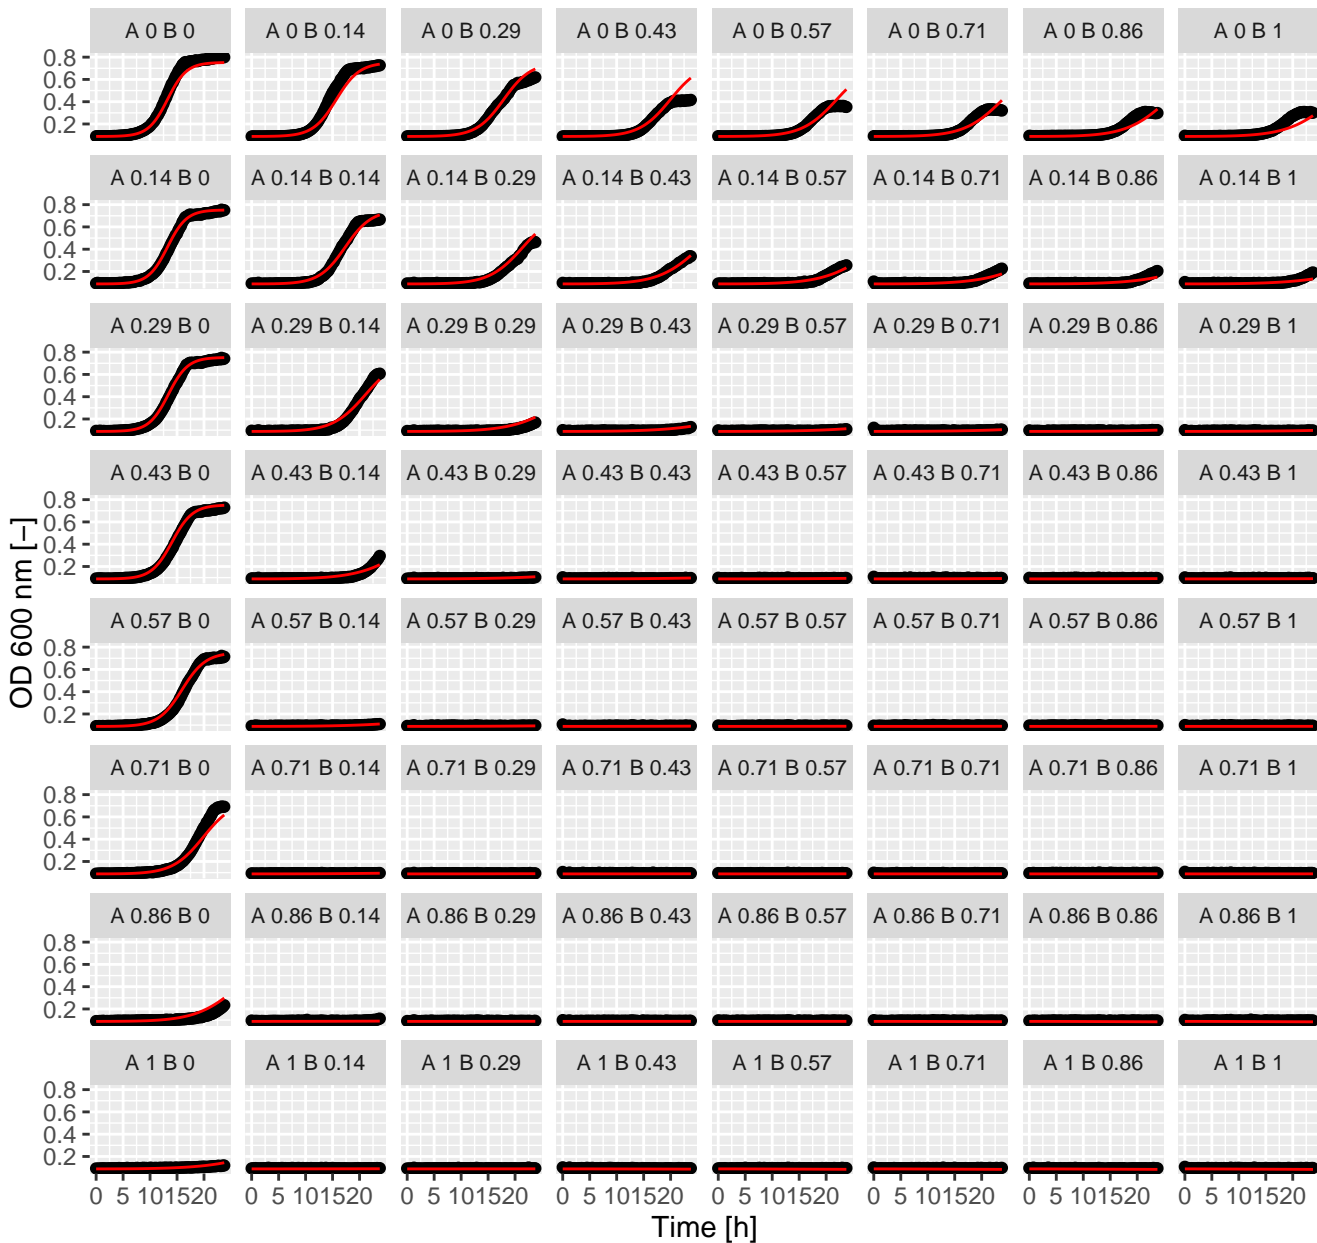

Sta.Tun (= Ax.Bx) exp. additivity (LA)  
Int\_AB = 0 and Int\_BA = 0 at EC50

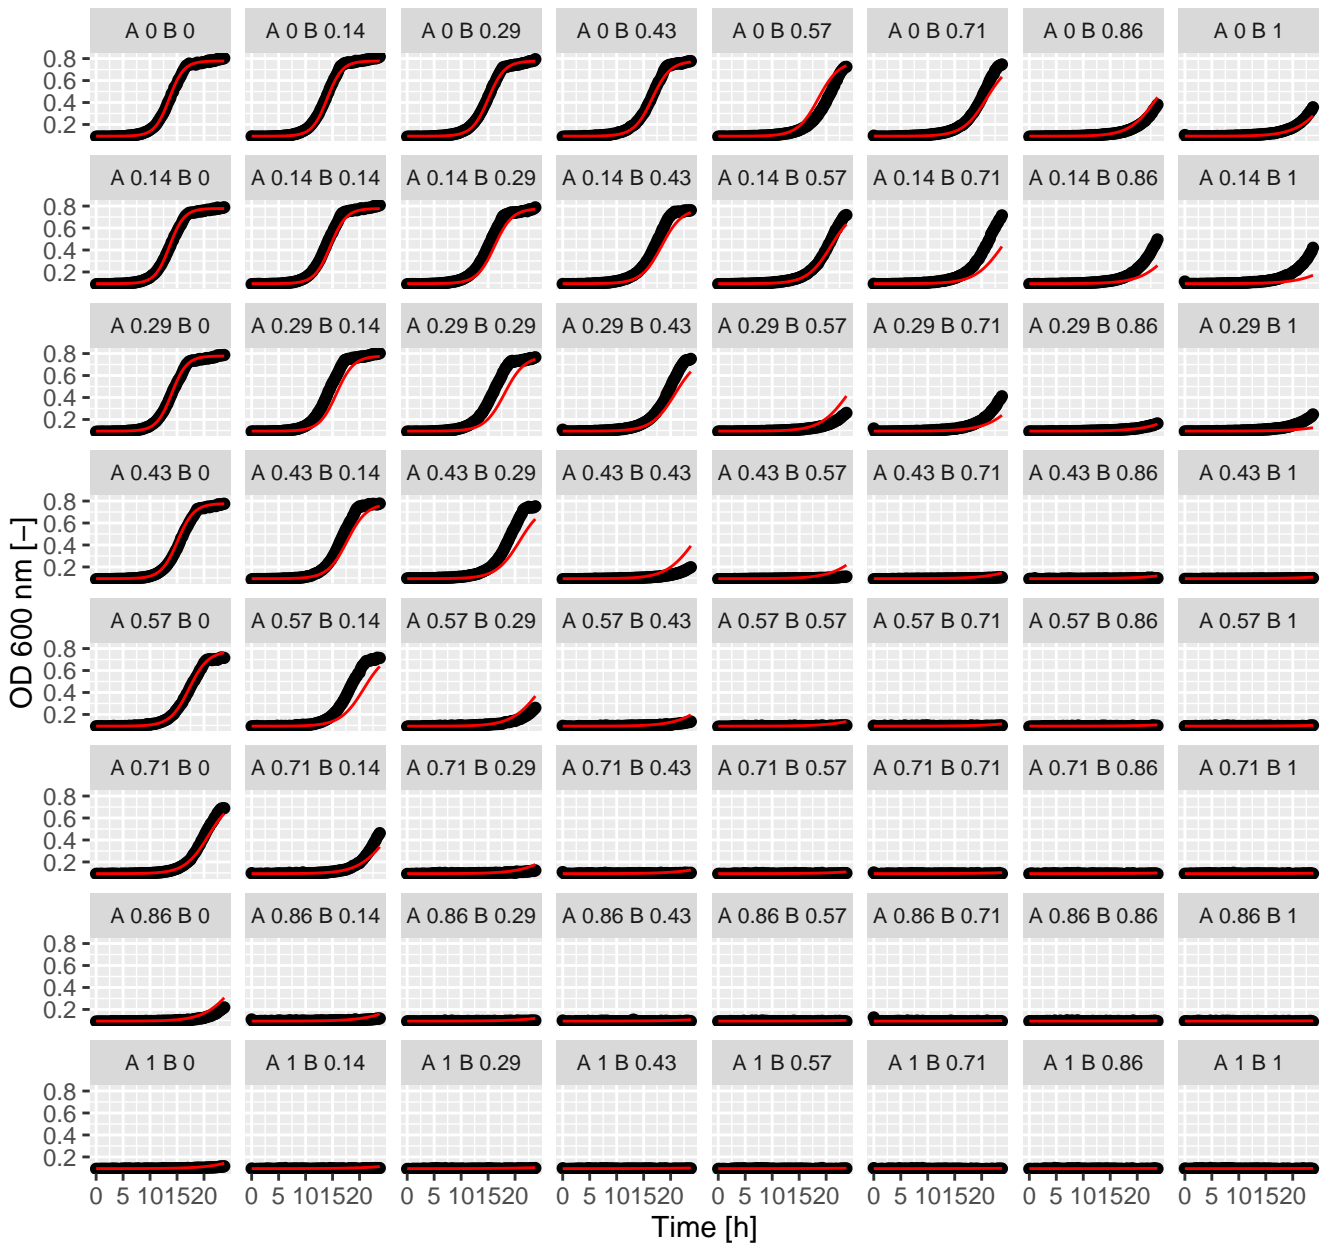

Sta.Tun (= Ax.Bx) full GPDI  
Int\_AB = 0.02 and Int\_BA = 0.15 at EC50

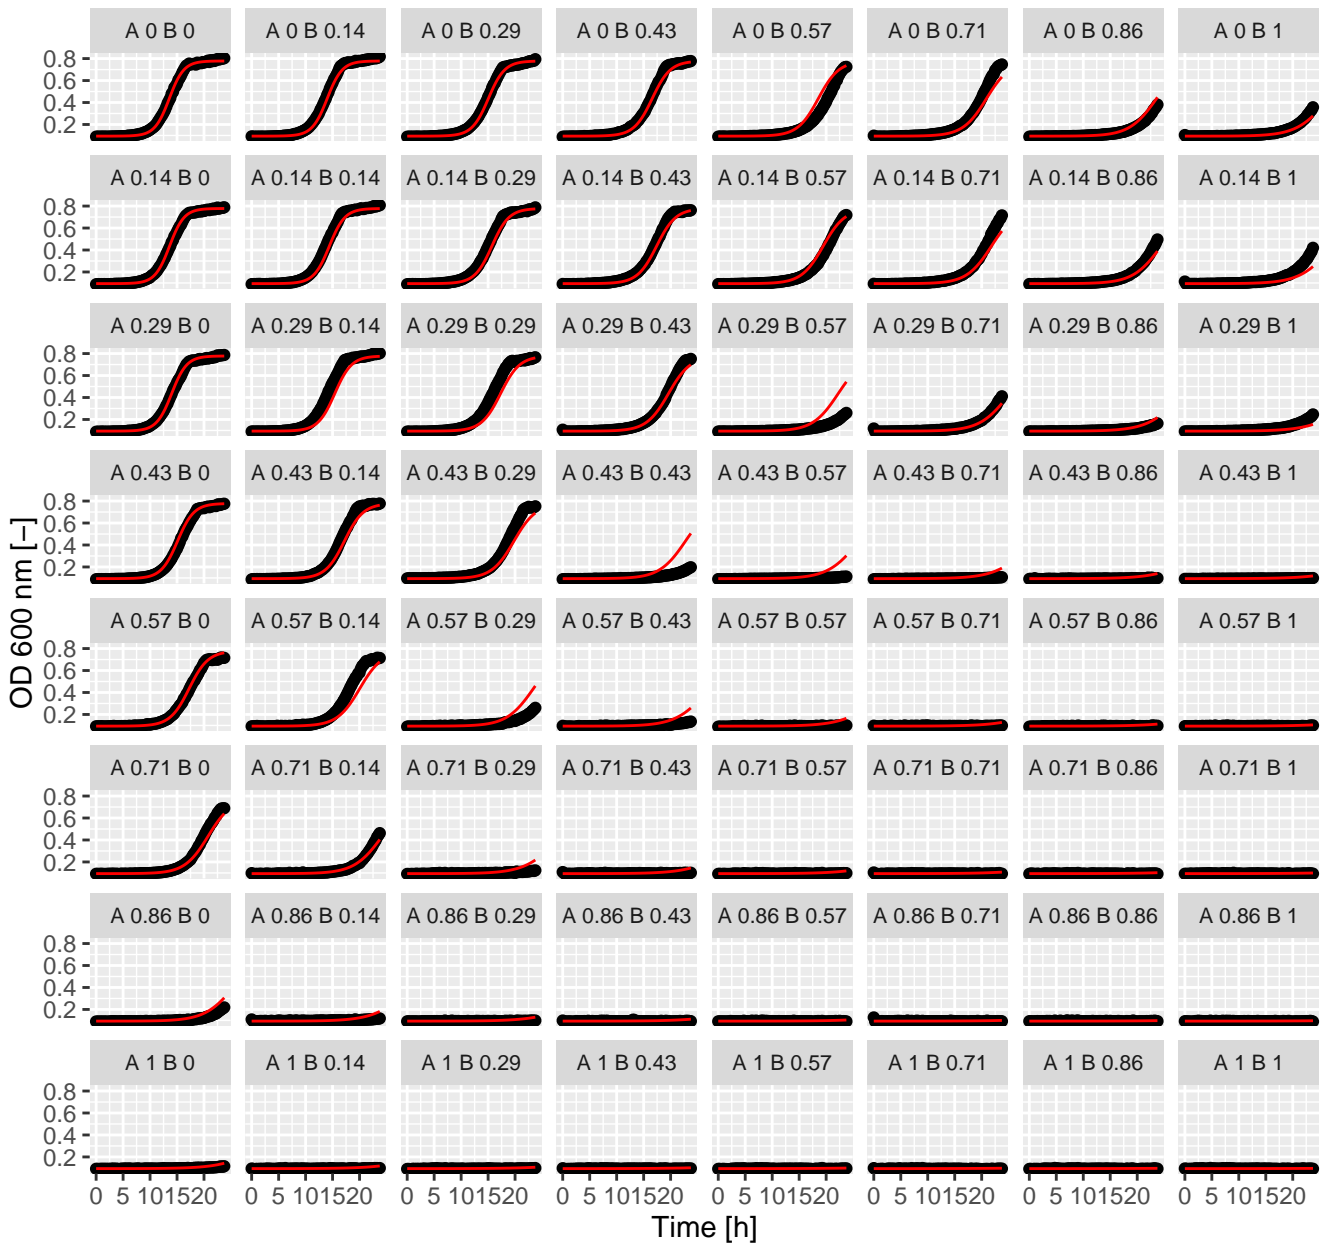

Sta.Wor (= Ax.Bx) exp. additivity (LA)  
Int\_AB = 0 and Int\_BA = 0 at EC50

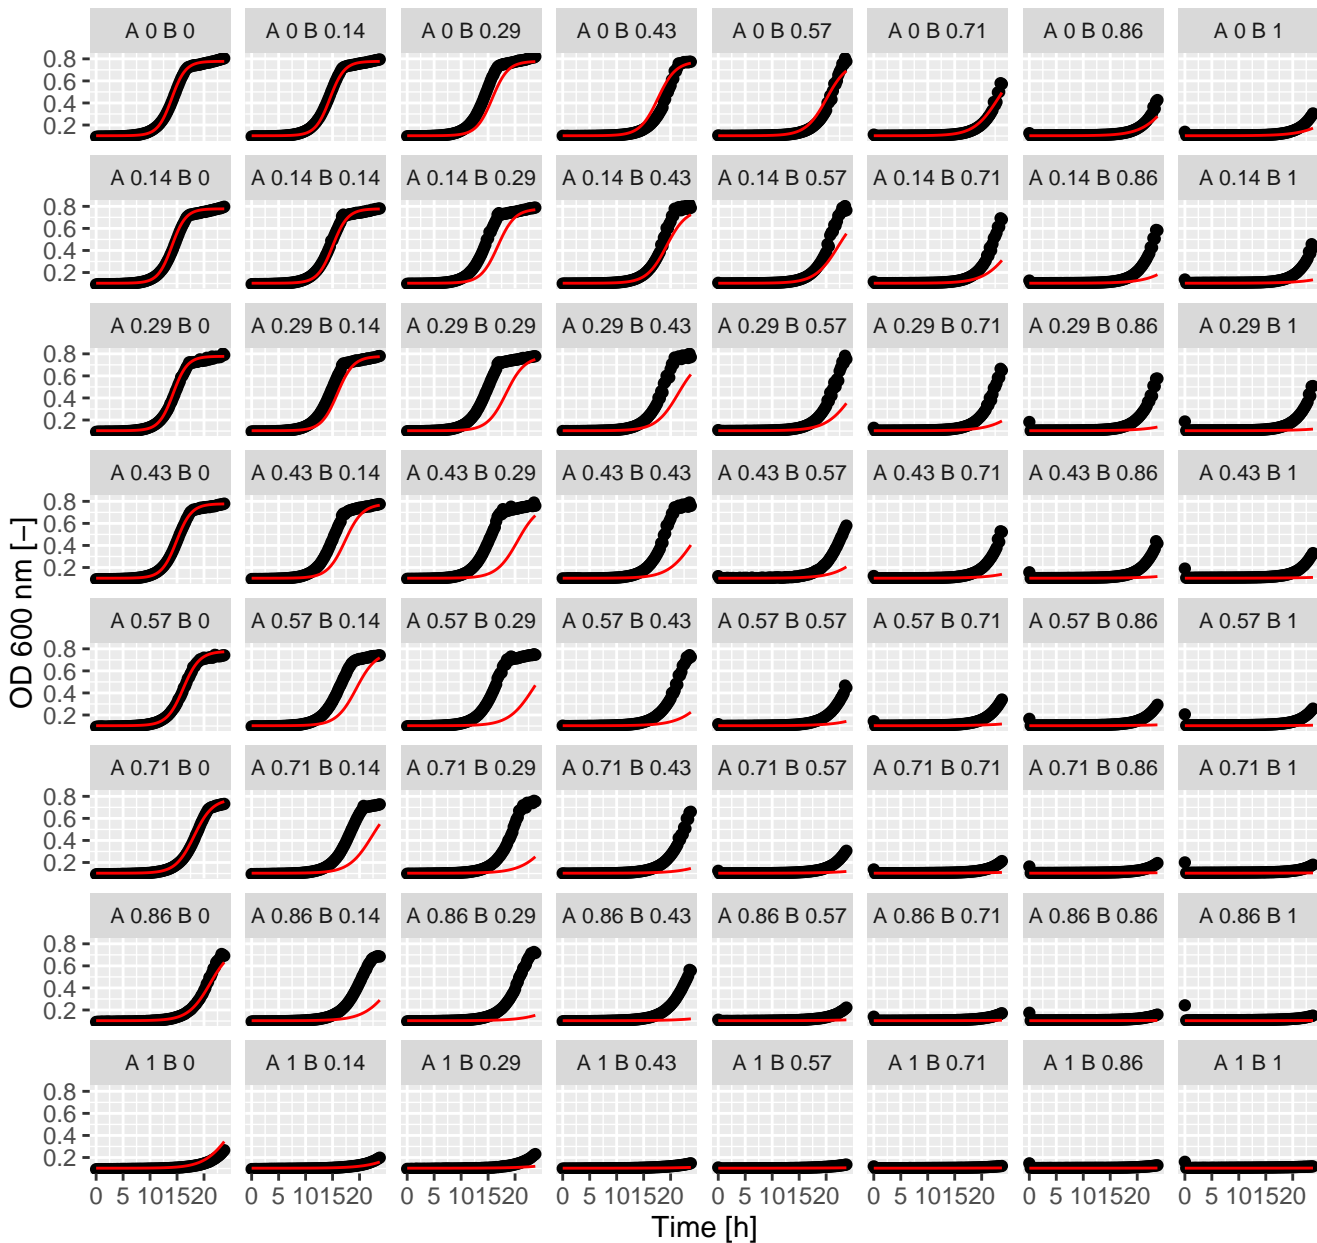

Sta.Wor (= Ax.Bx) full GPDI  
Int\_AB = 0.36 and Int\_BA = 0.7 at EC50

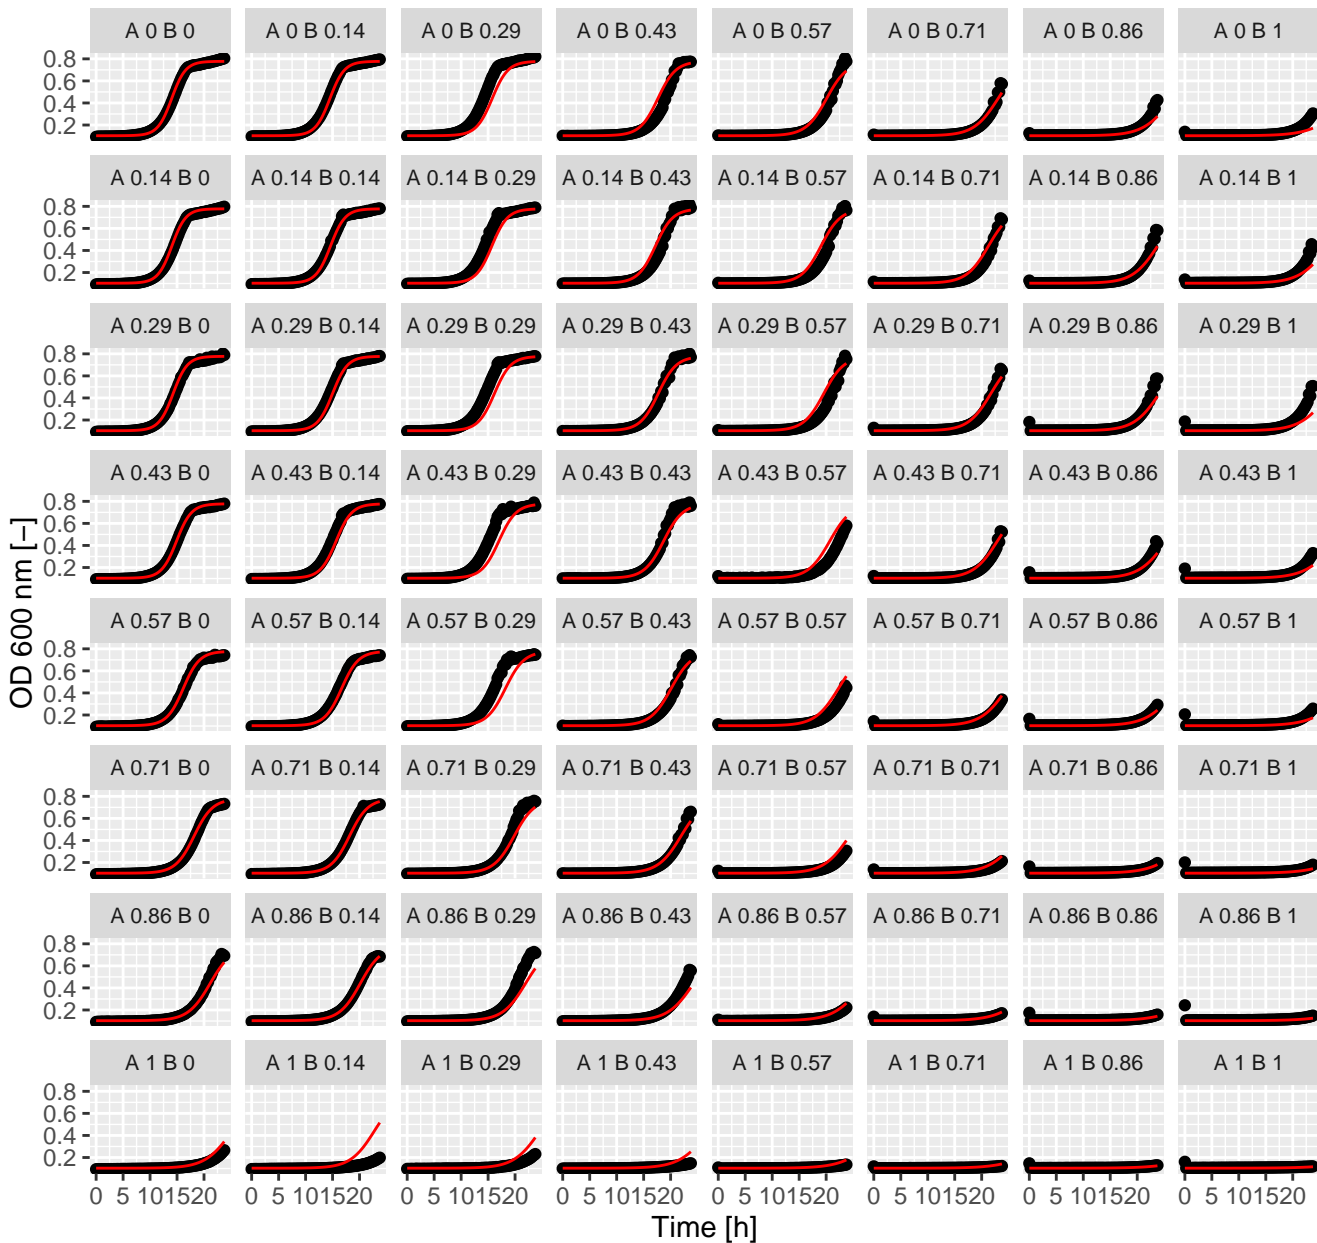



Tac.Tac (= Ax.Bx) exp. additivity (LA)  
Int\_AB = 0 and Int\_BA = 0 at EC50

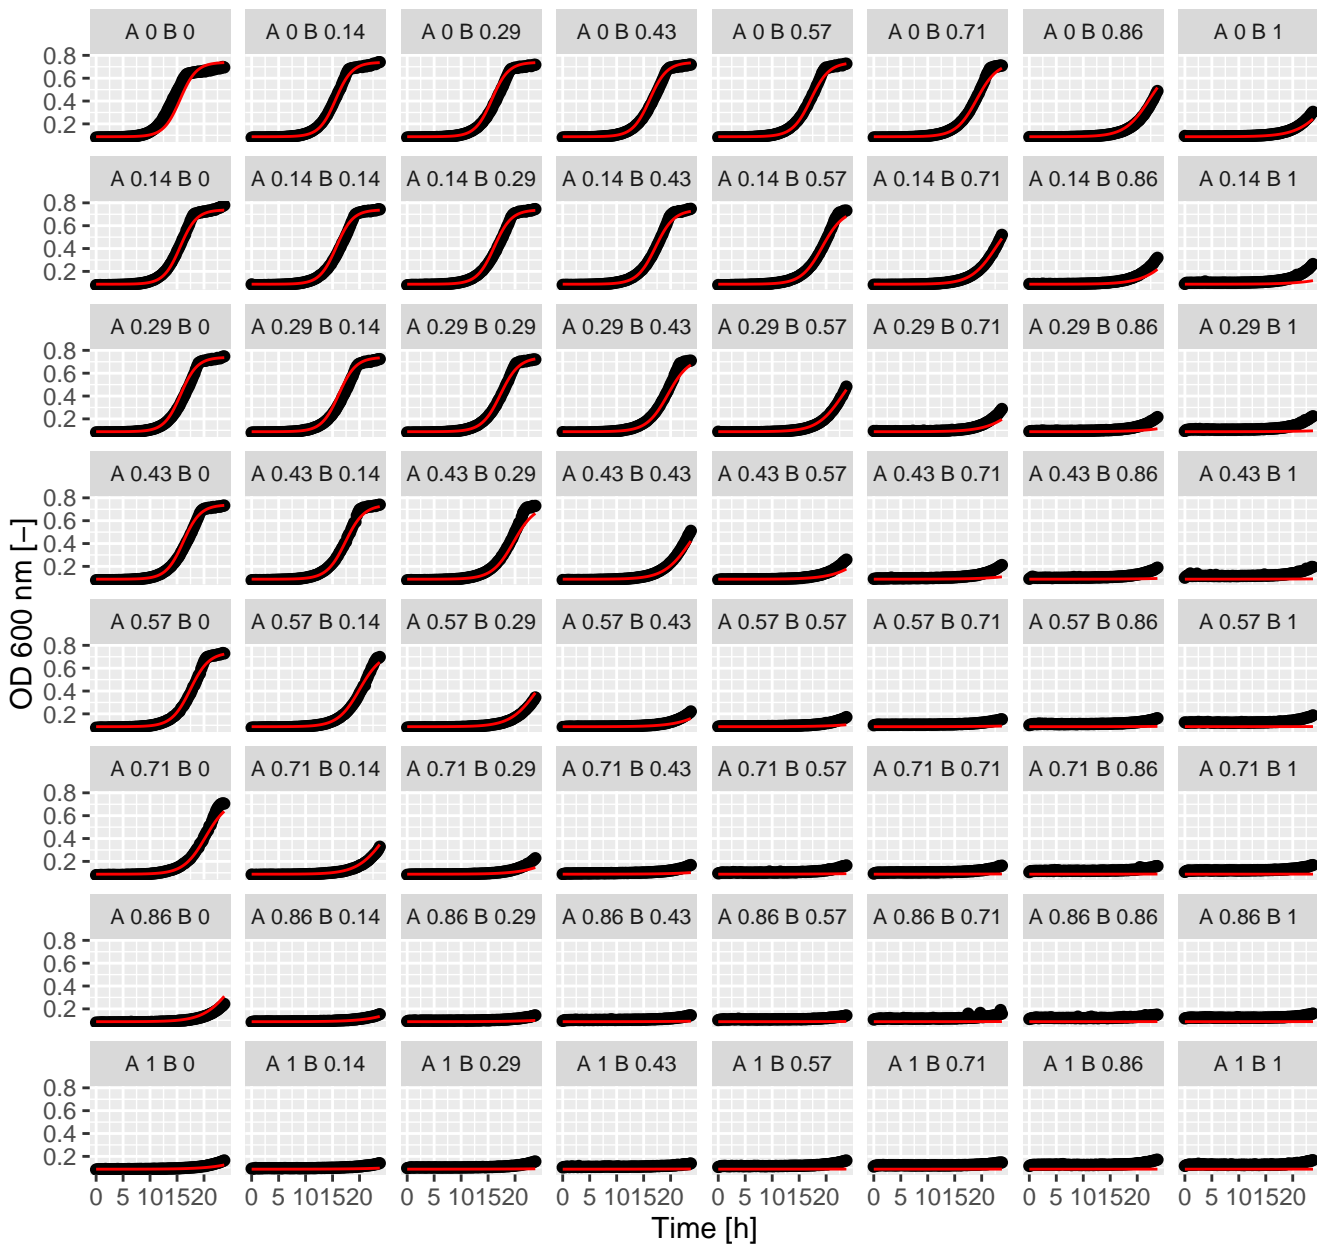

Tac.Tac (= Ax.Bx) full GPDI  
 Int\_AB = 0.03 and Int\_BA = 0.11 at EC50

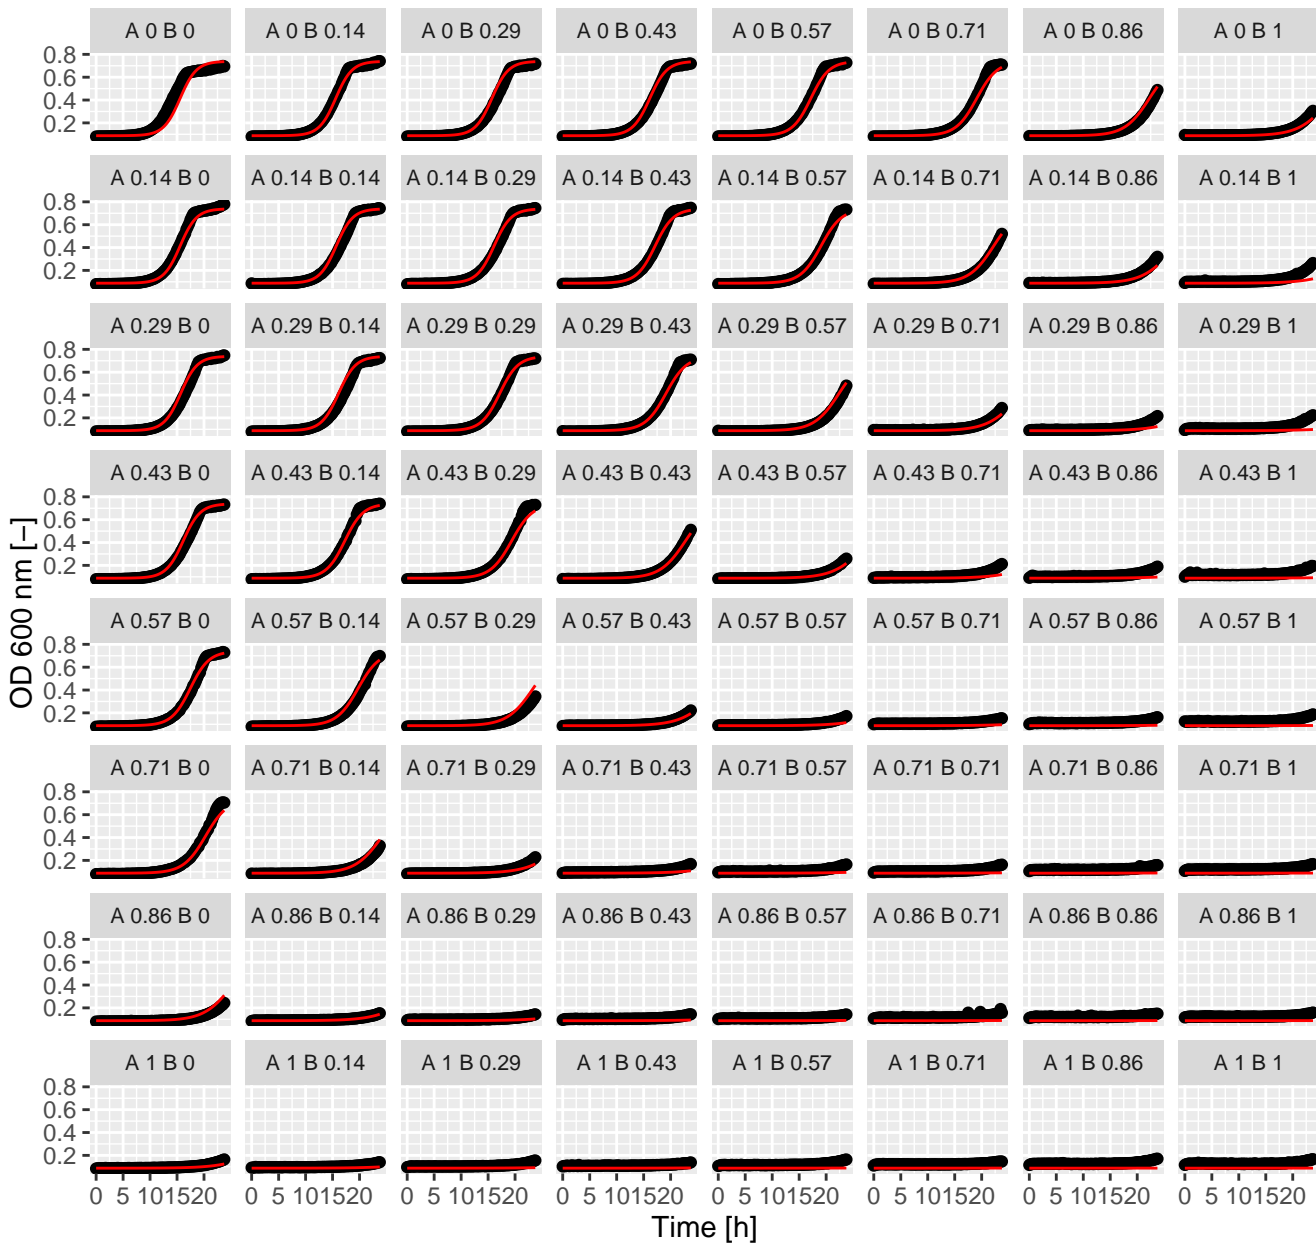

Tac.Tam (= Ax.Bx) exp. additivity (LA)  
 Int\_AB = 0 and Int\_BA = 0 at EC50

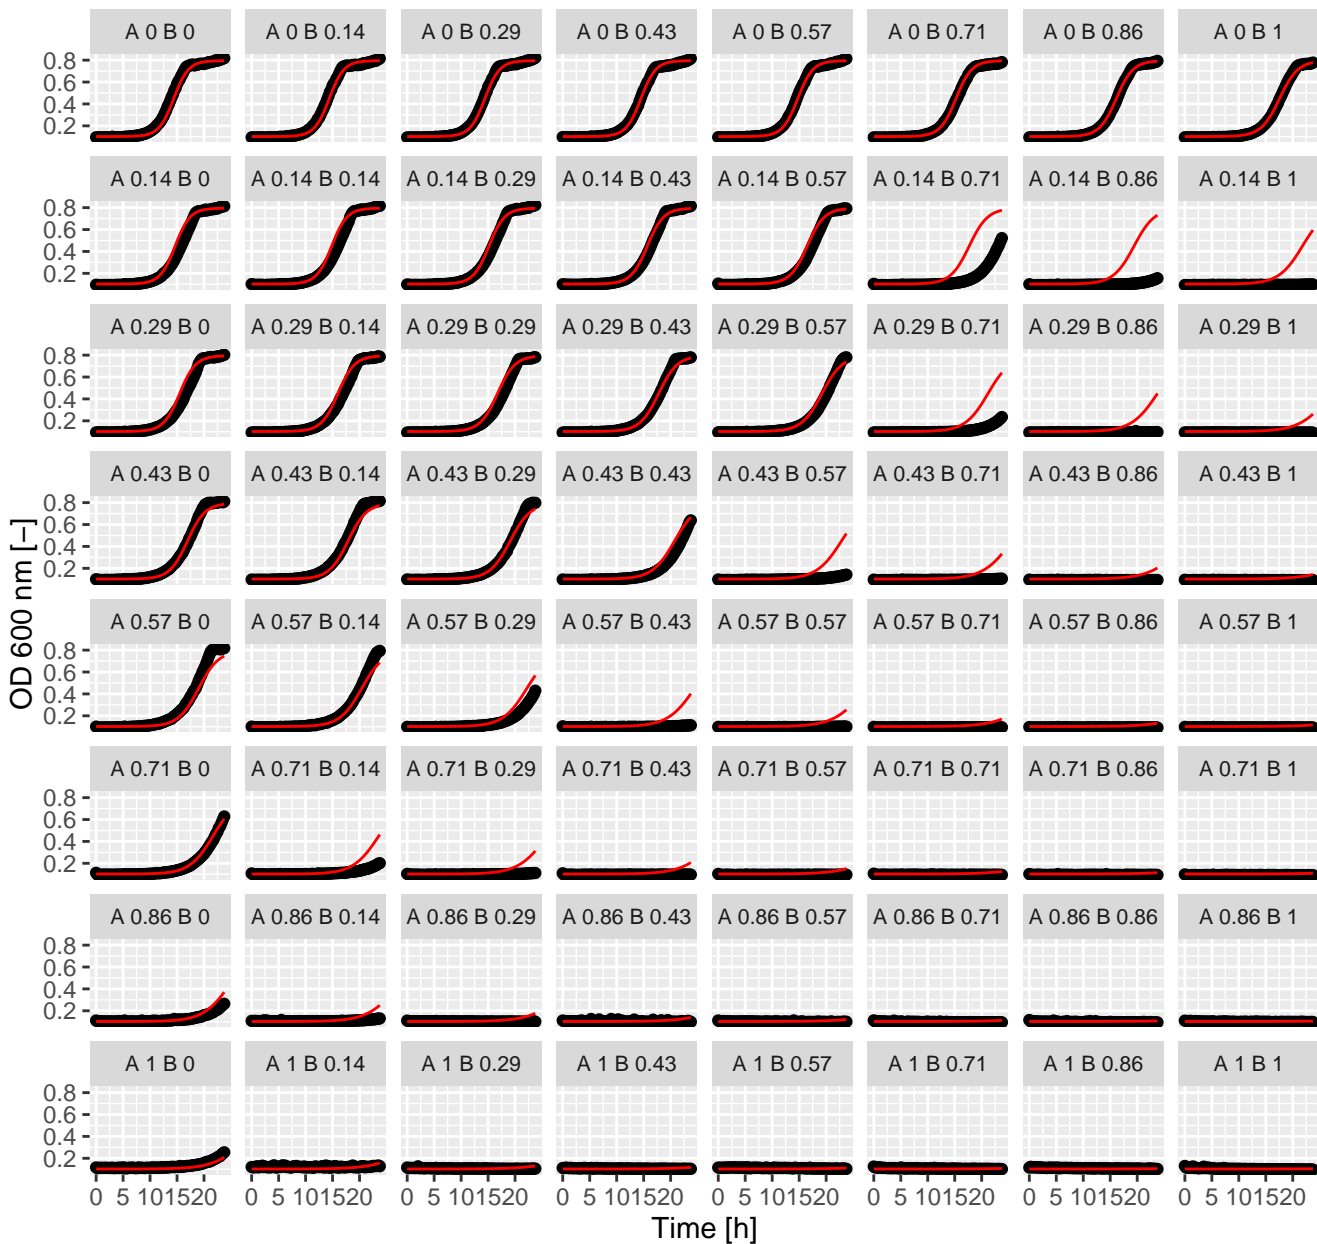

Tac.Tam (= Ax.Bx) full GPDI  
Int\_AB = -0.06 and Int\_BA = -0.25 at EC50

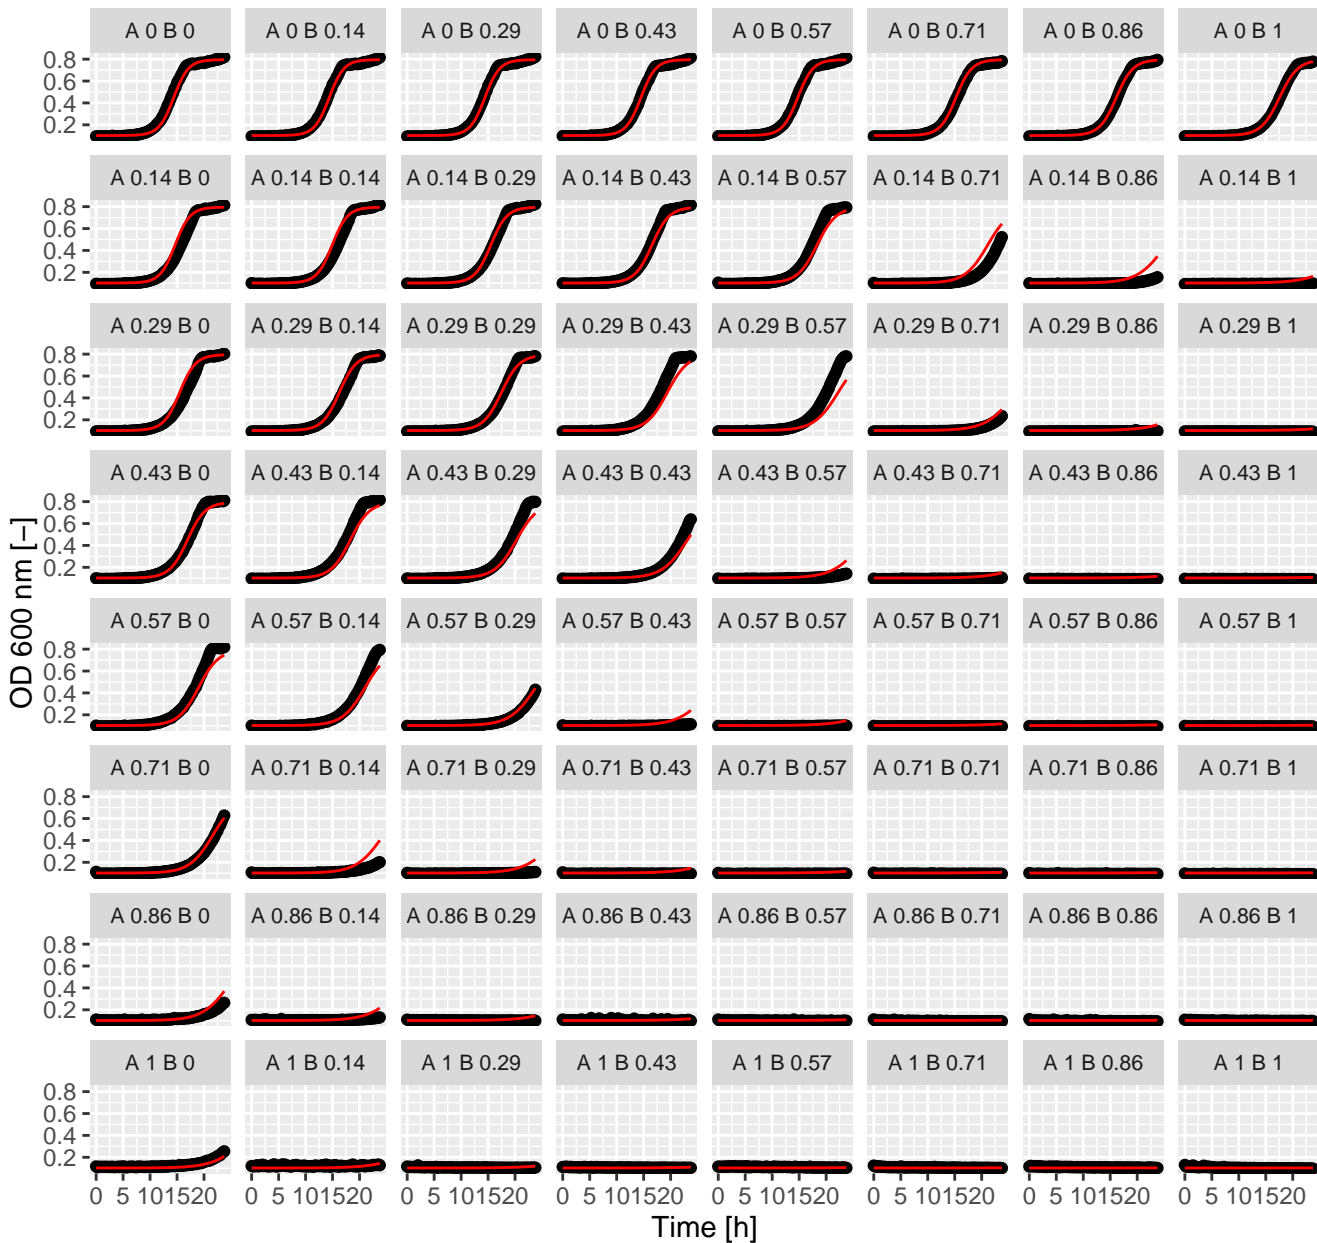

Tac.Ter (= Ax.Bx) exp. additivity (LA)  
 Int\_AB = 0 and Int\_BA = 0 at EC50

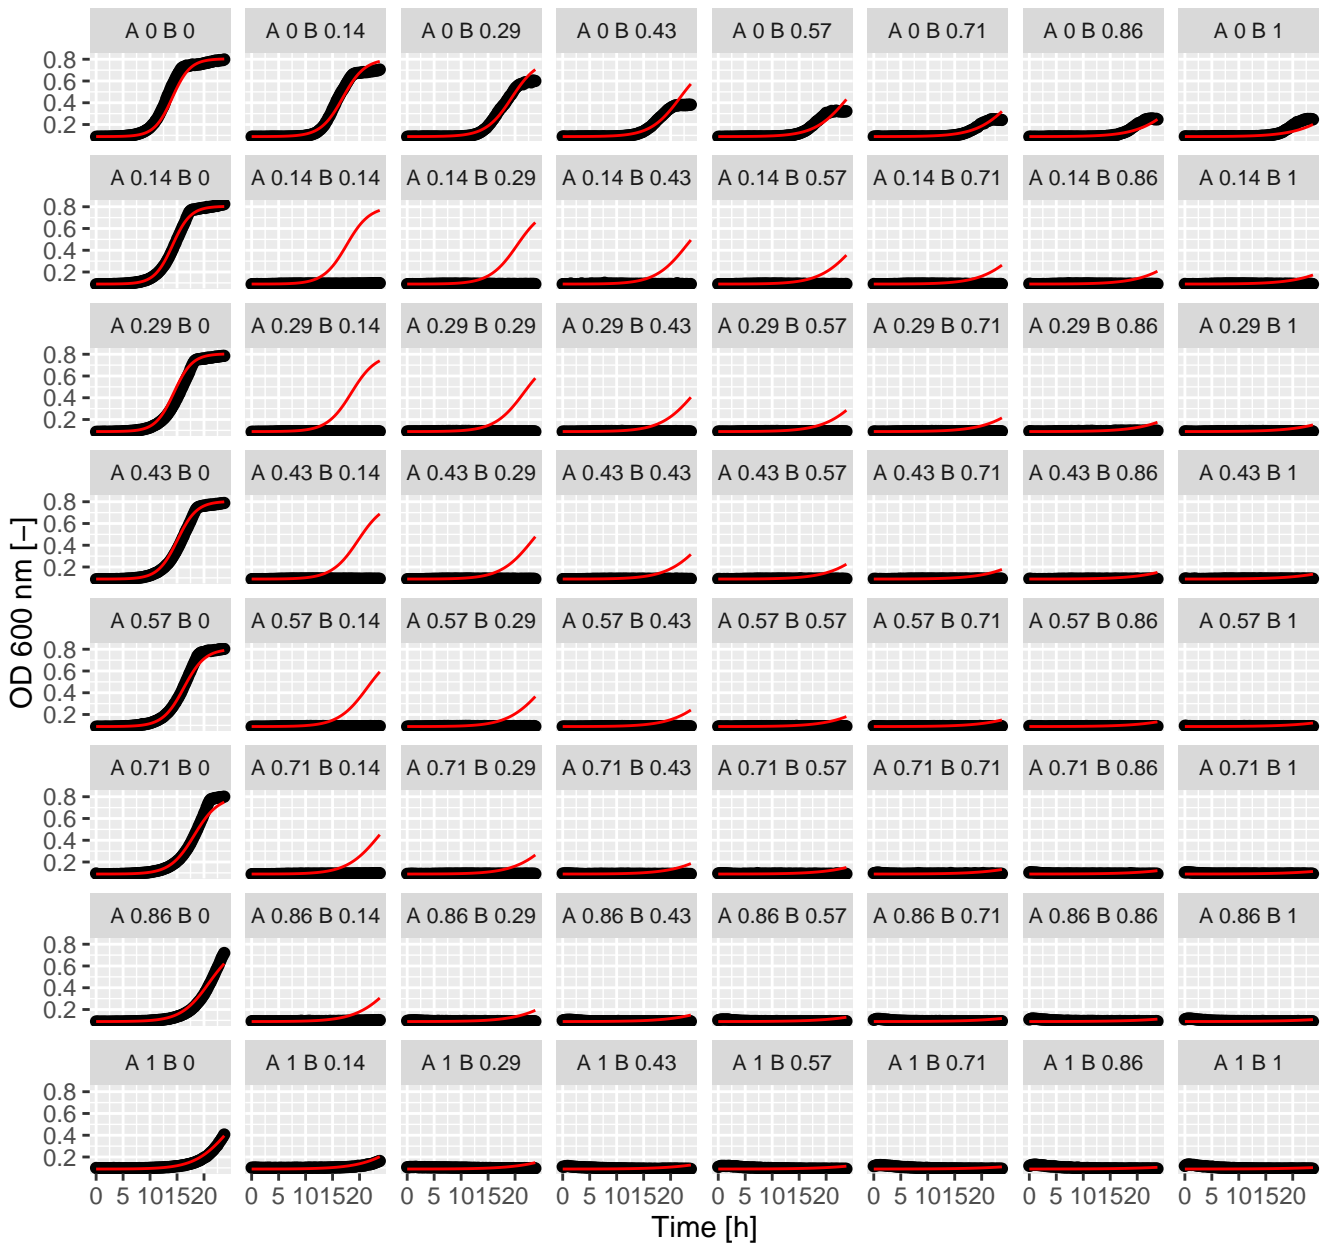

Tac.Ter (= Ax.Bx) full GPDI  
 Int\_AB = 2.69 and Int\_BA = -0.93 at EC50

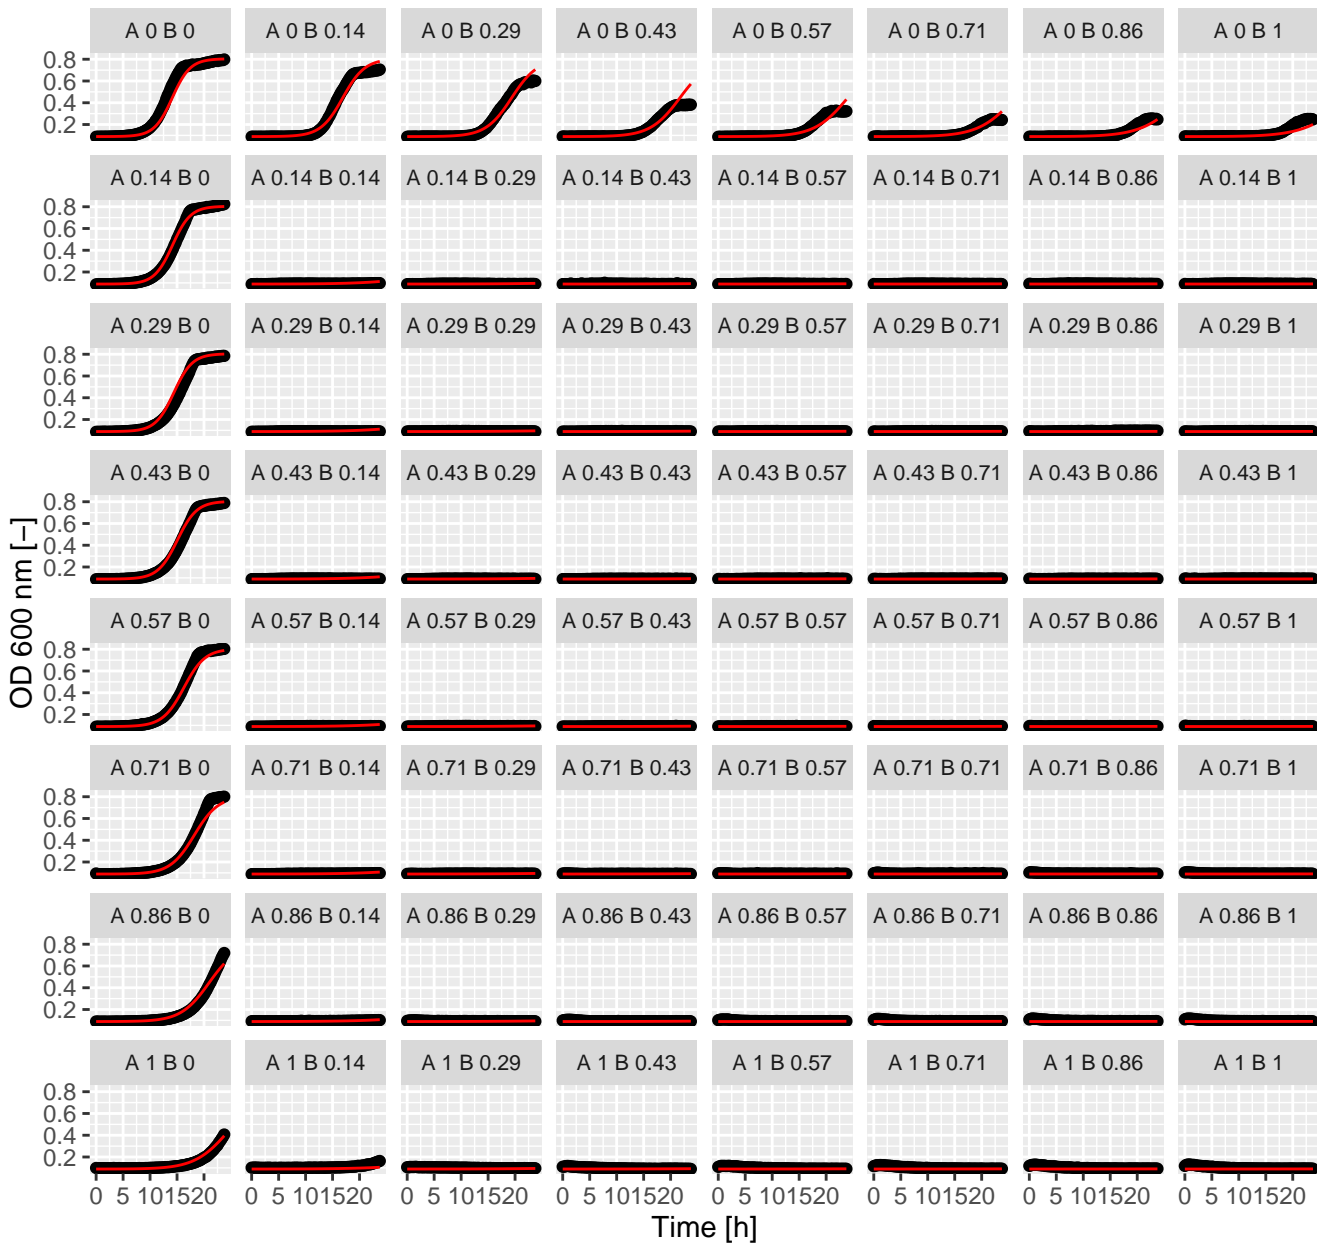

Tac.Tun (= Ax.Bx) exp. additivity (LA)  
Int\_AB = 0 and Int\_BA = 0 at EC50

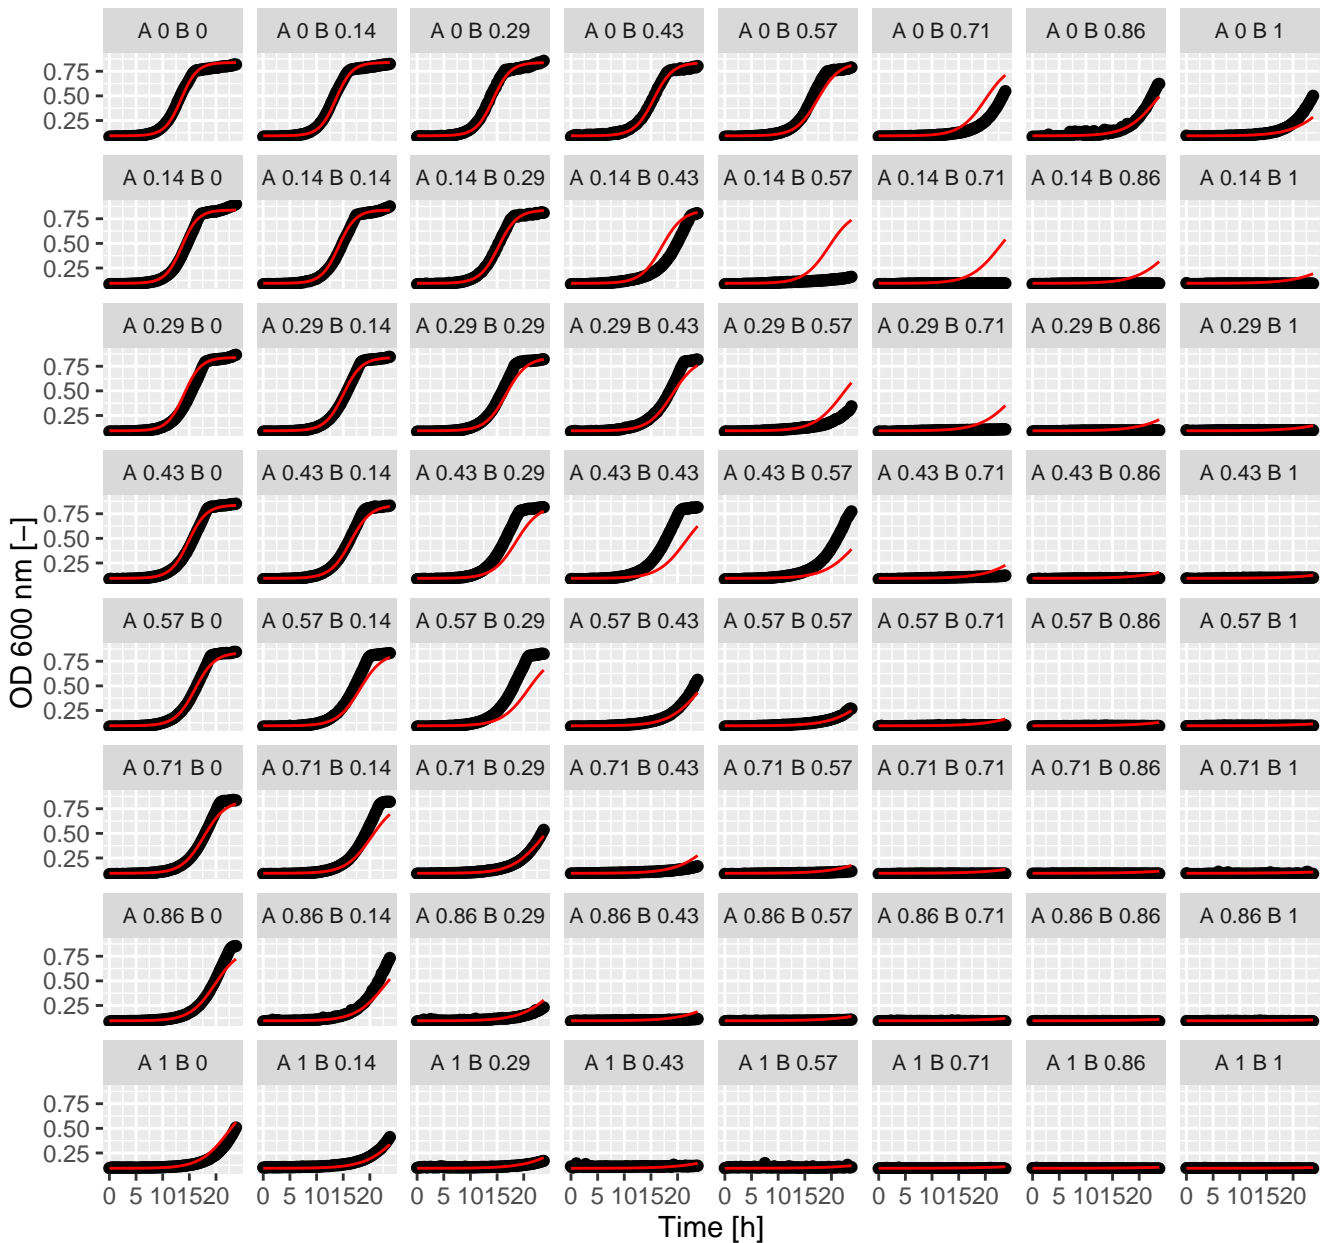

Tac.Tun (= Ax.Bx) full GPDI  
 Int\_AB = 0.86 and Int\_BA = -0.22 at EC50

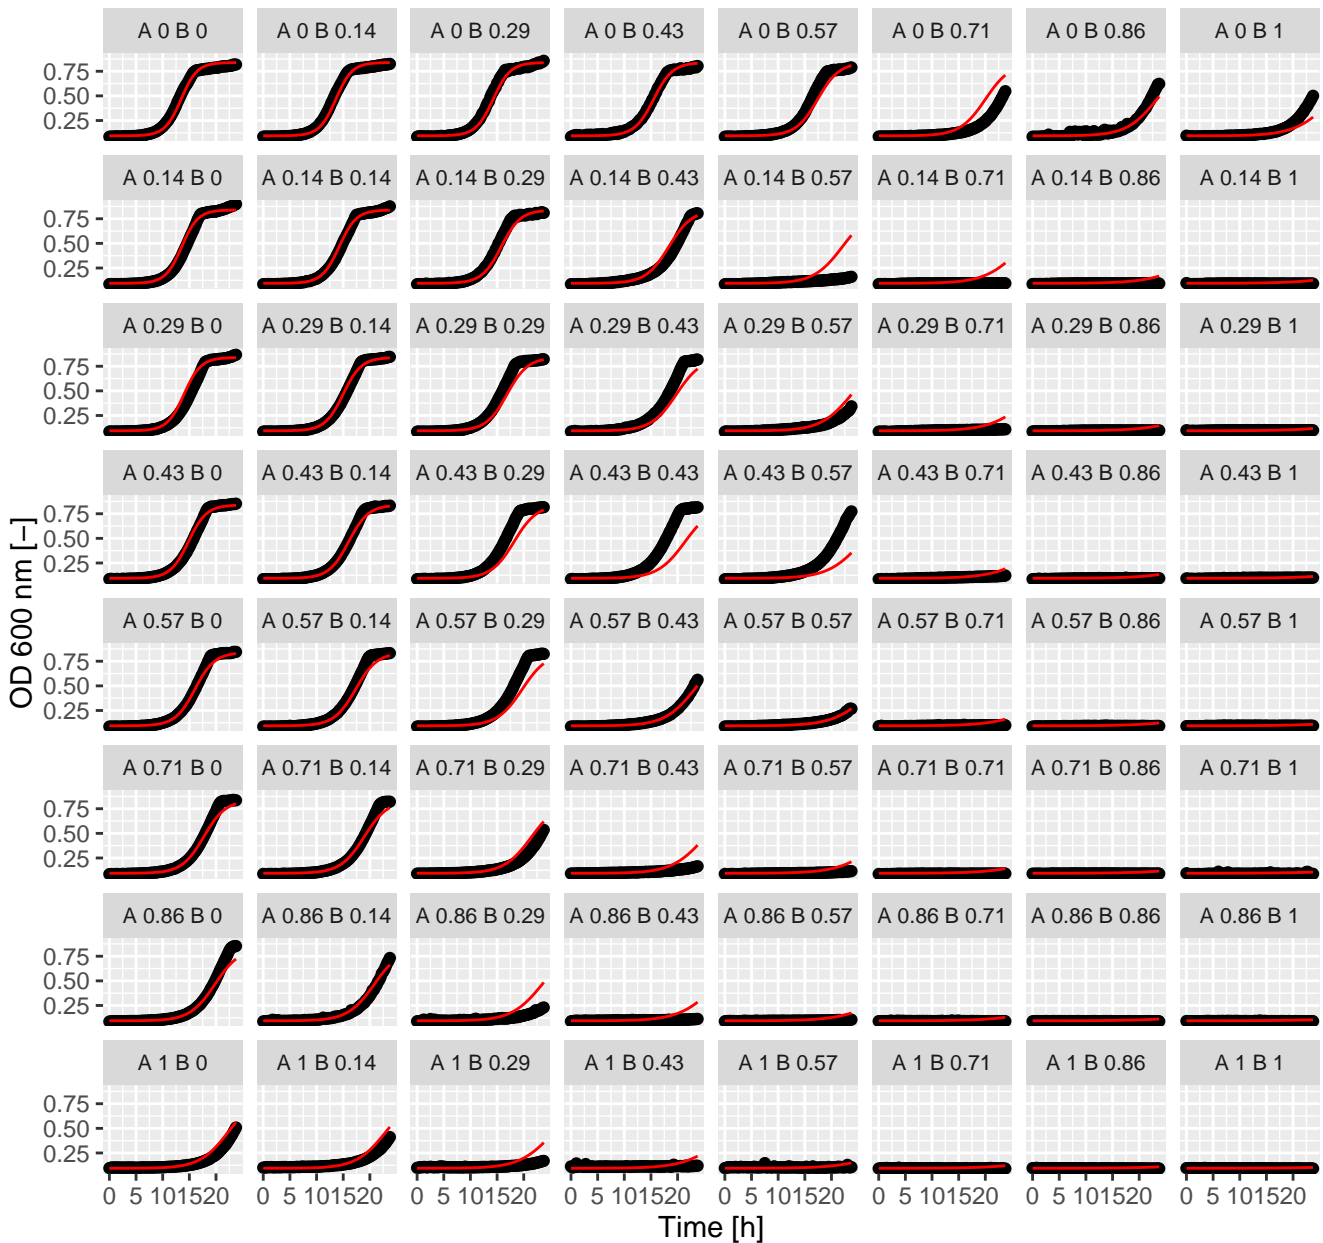



Tam.Tam (= Ax.Bx) exp. additivity (LA)  
 Int\_AB = 0 and Int\_BA = 0 at EC50

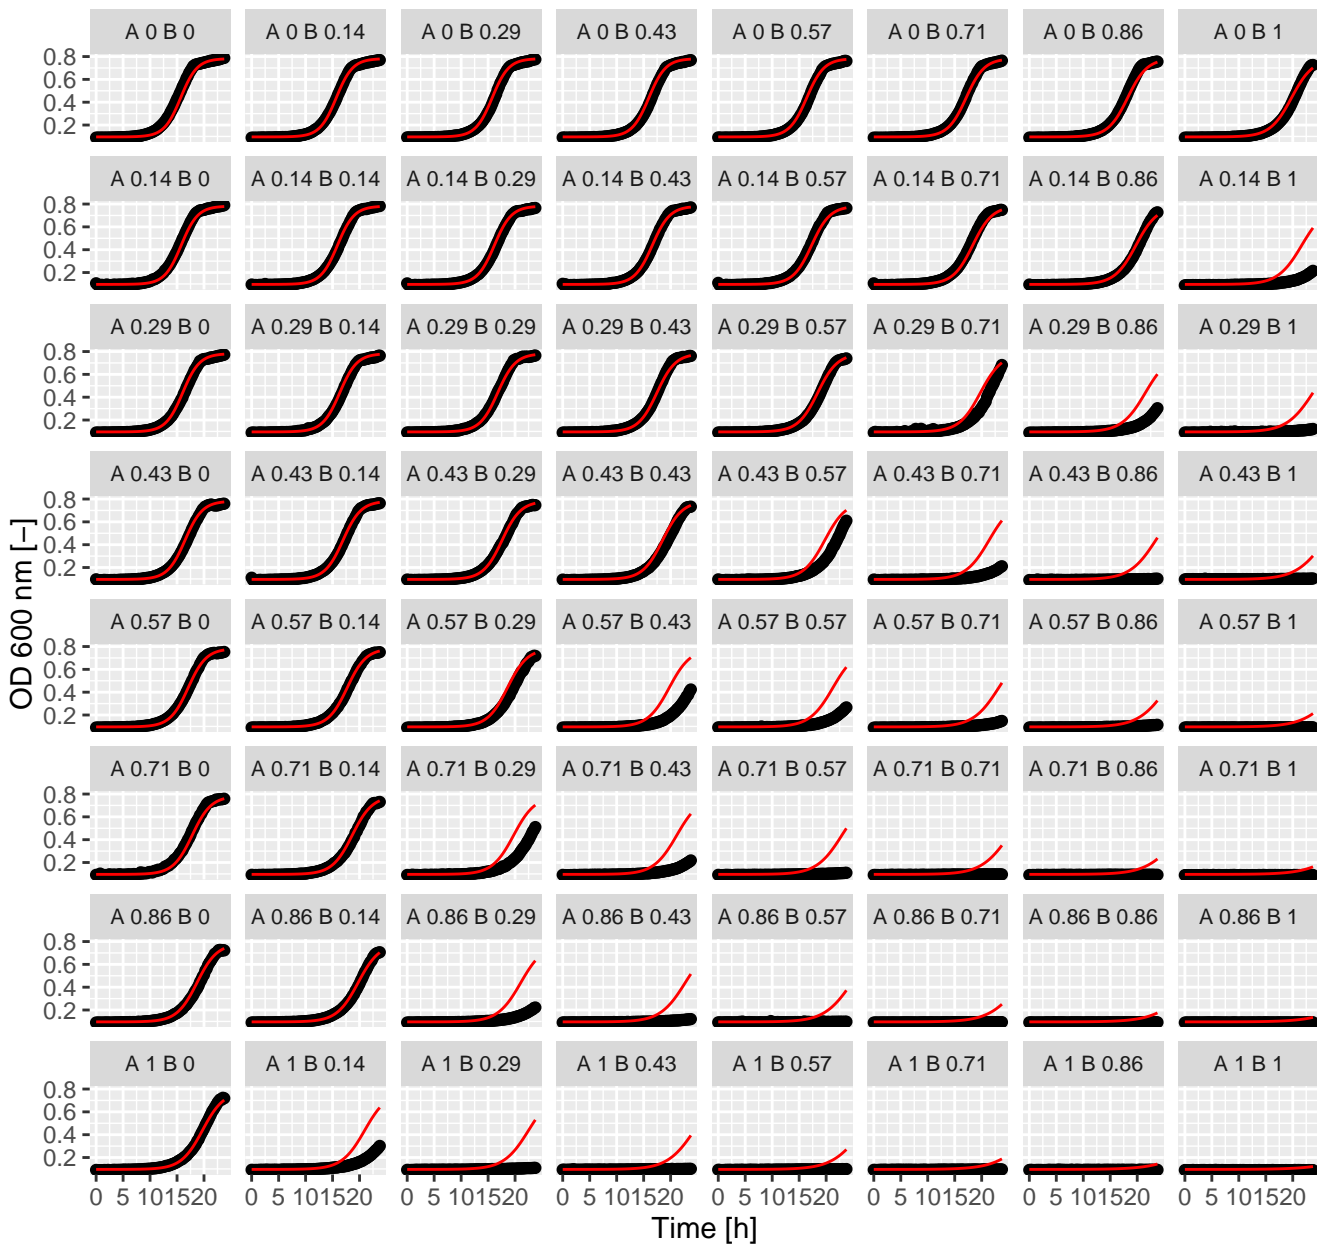

Tam.Tam (= Ax.Bx) full GPDI  
 Int\_AB = 0.35 and Int\_BA = -0.7 at EC50

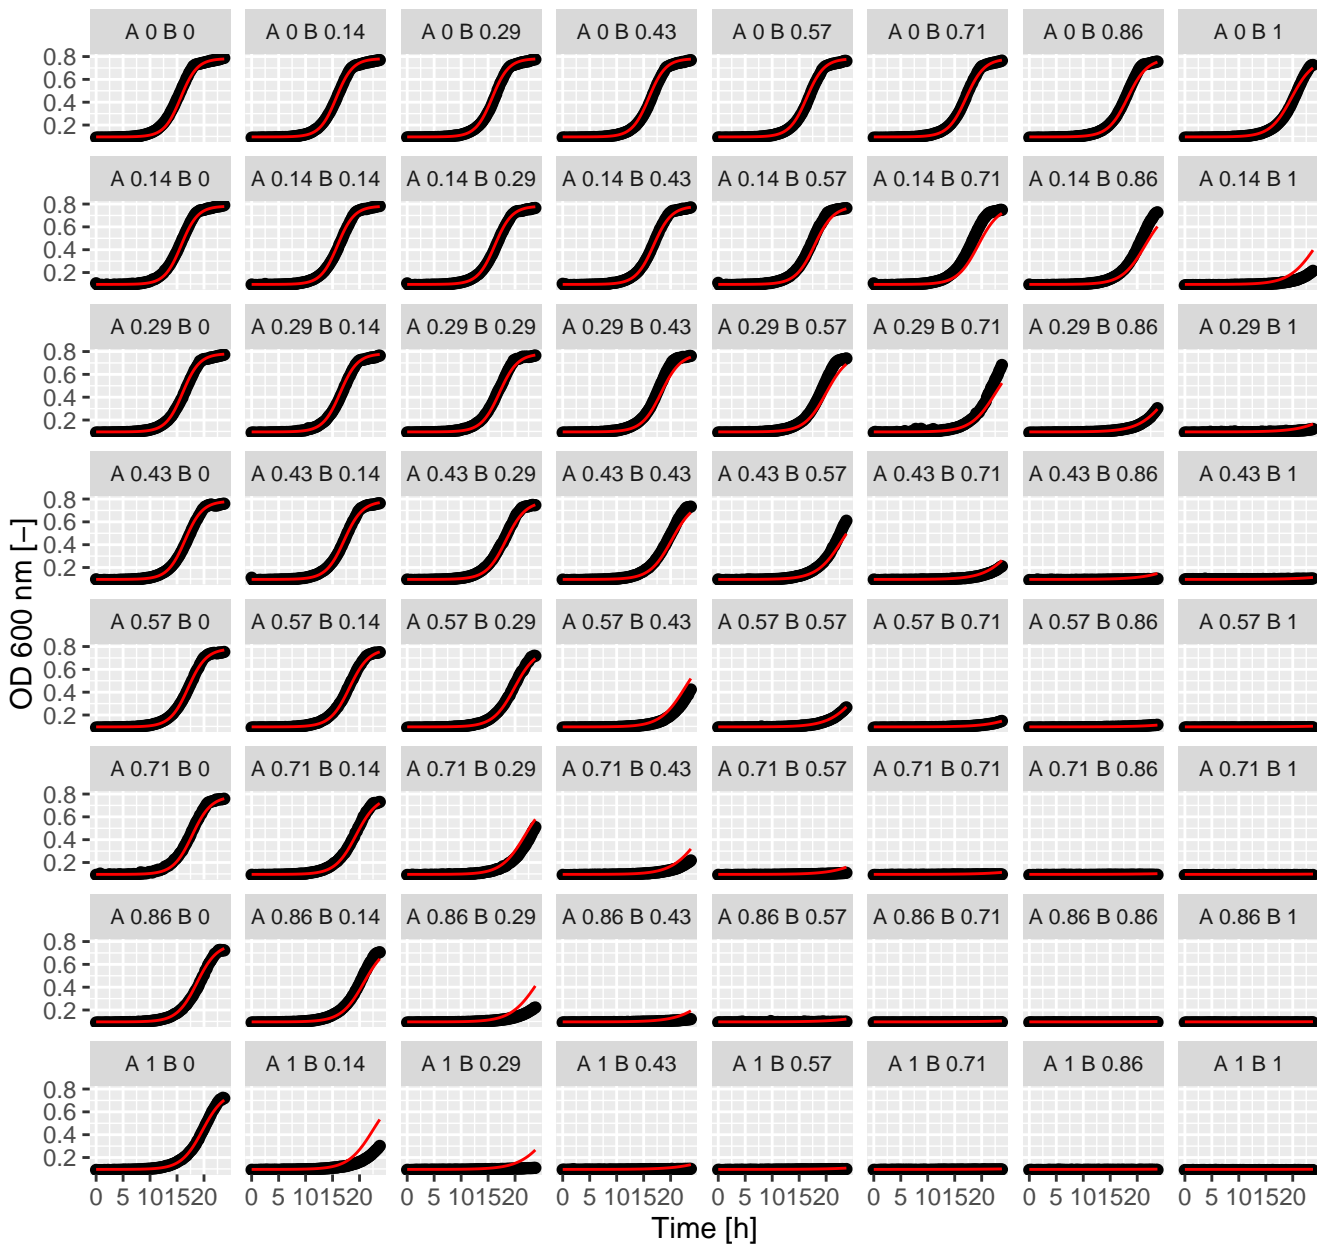

Tam.Ter (= Ax.Bx) exp. additivity (LA)  
Int\_AB = 0 and Int\_BA = 0 at EC50

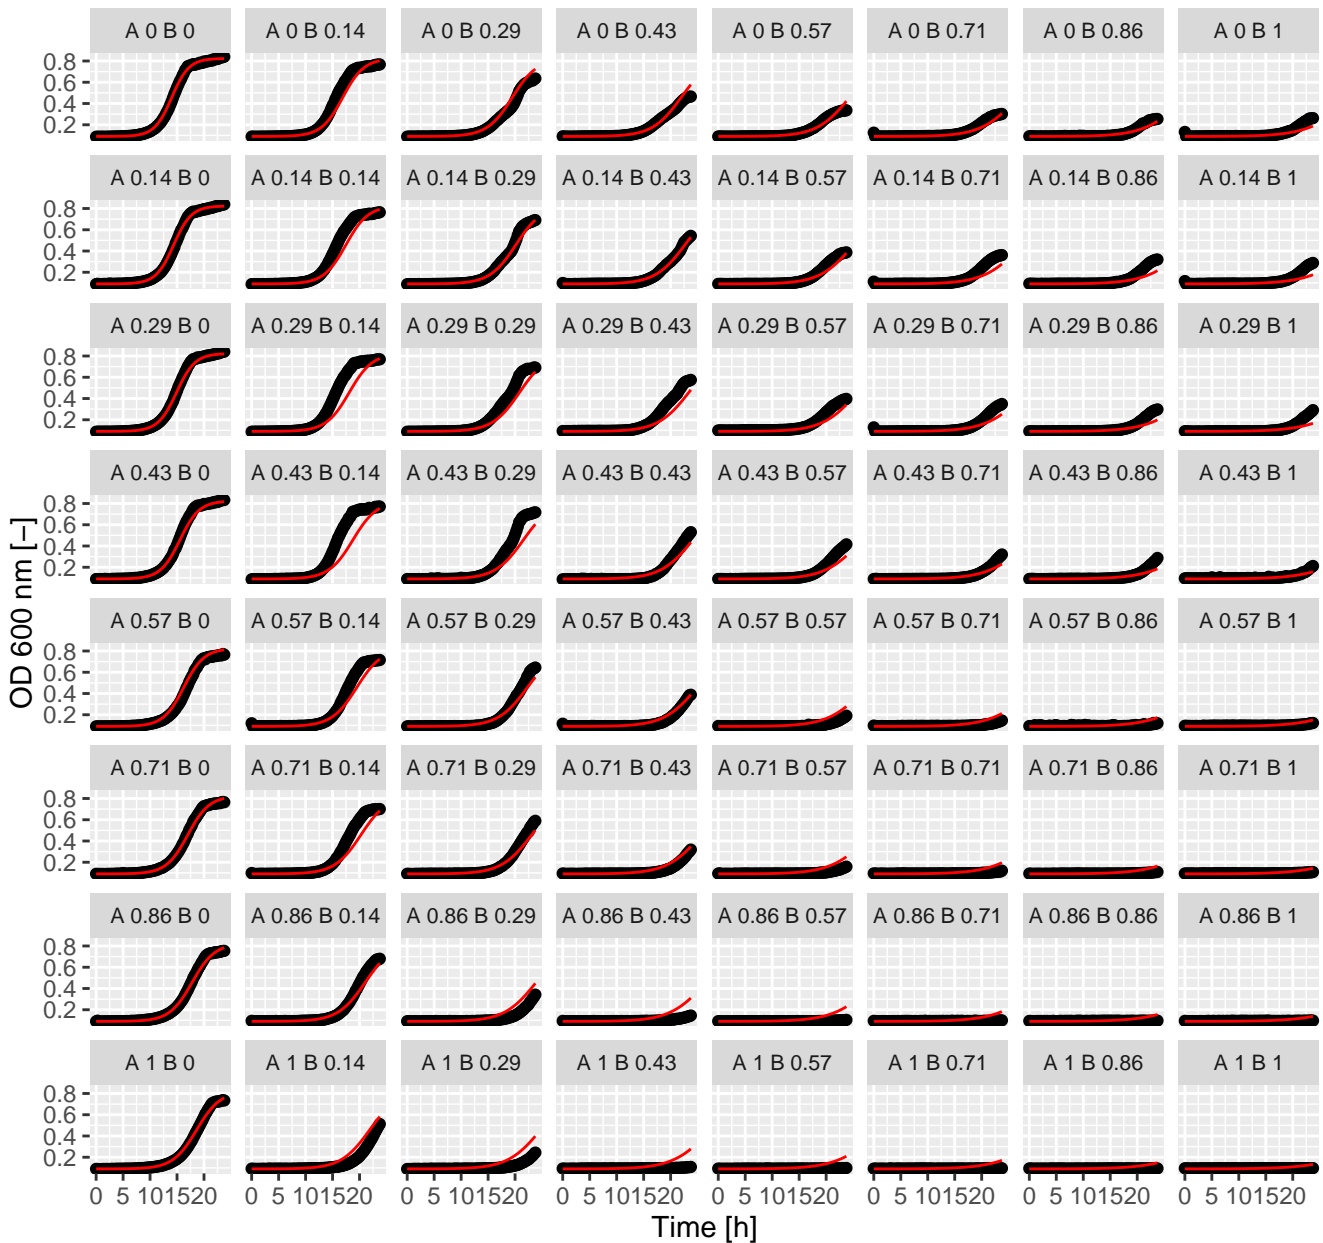

Tam.Ter (= Ax.Bx) full GPDI  
Int\_AB = -0.72 and Int\_BA = 9.67 at EC50

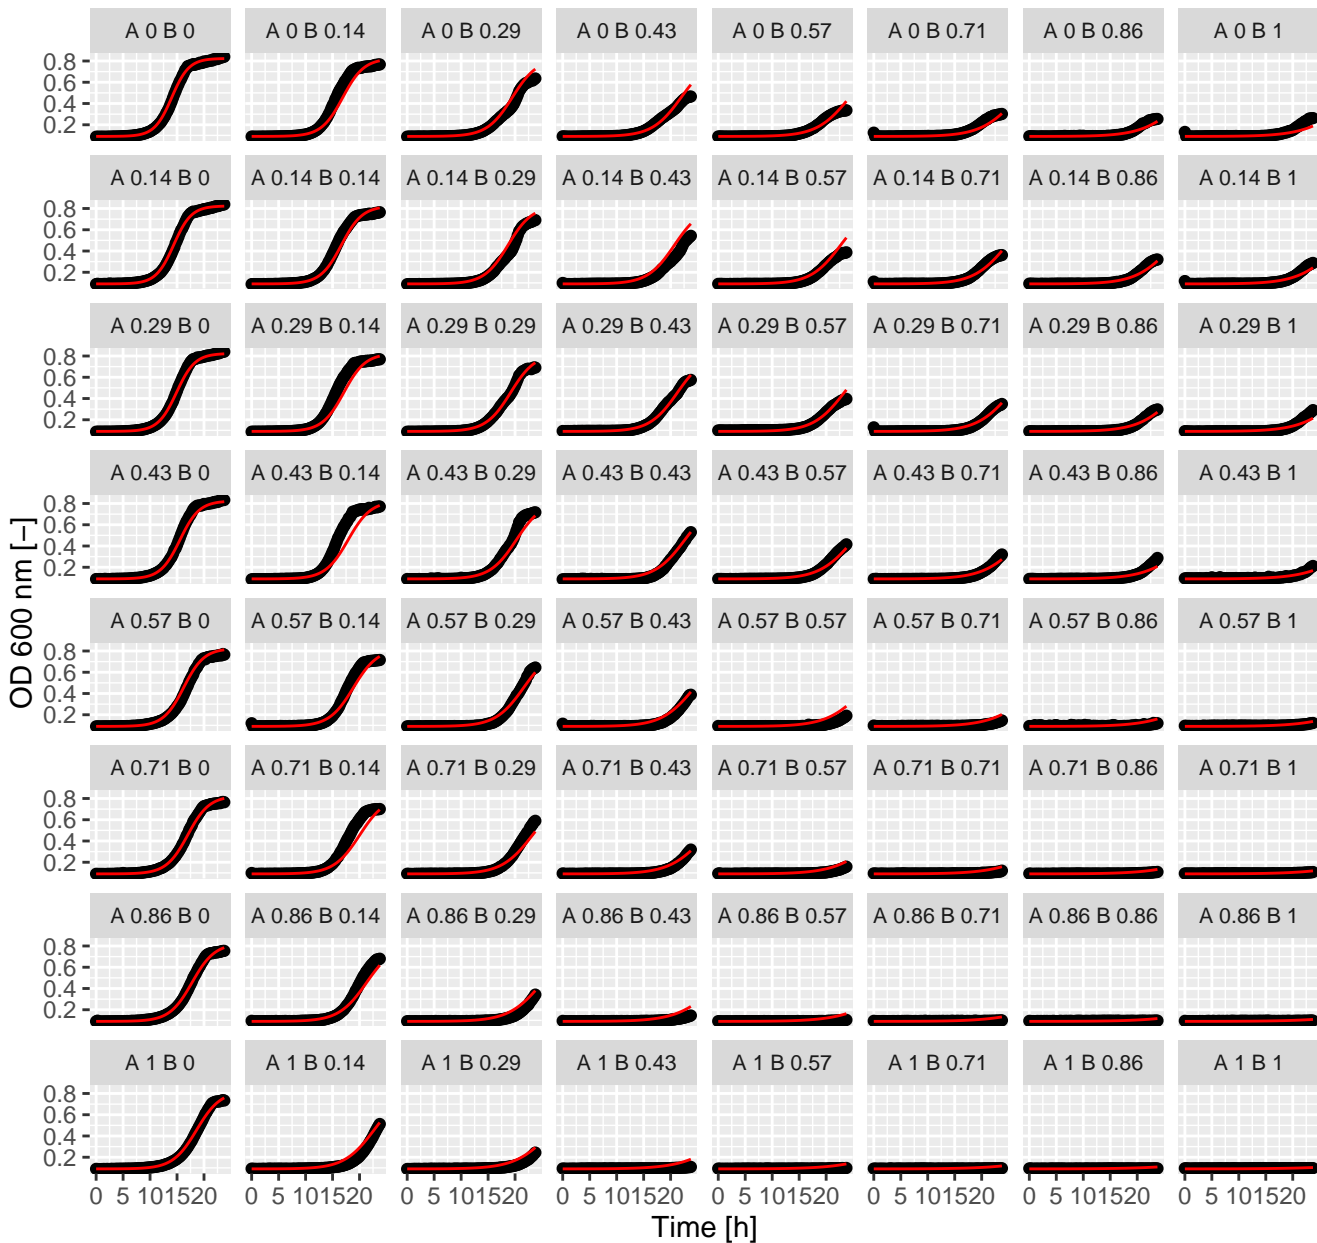

Ter.Ter (= Ax.Bx) exp. additivity (LA)  
Int\_AB = 0 and Int\_BA = 0 at EC50

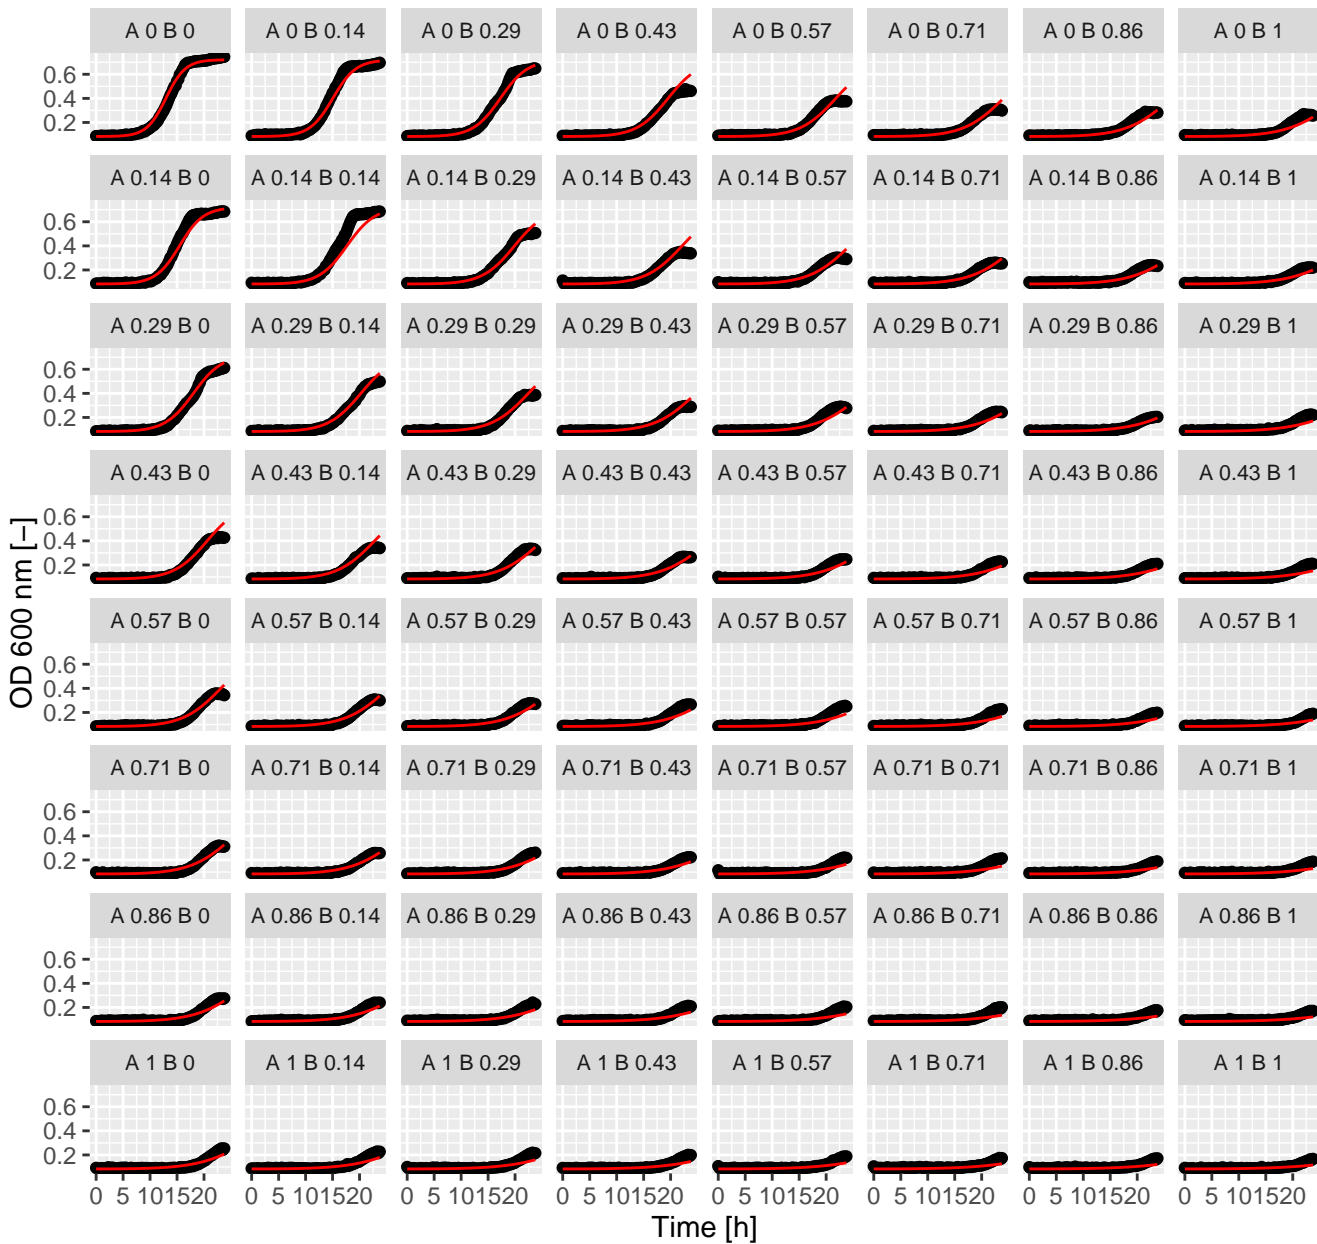

Ter.Ter (= Ax.Bx) full GPDI  
Int\_AB = 0.23 and Int\_BA = 0.15 at EC50

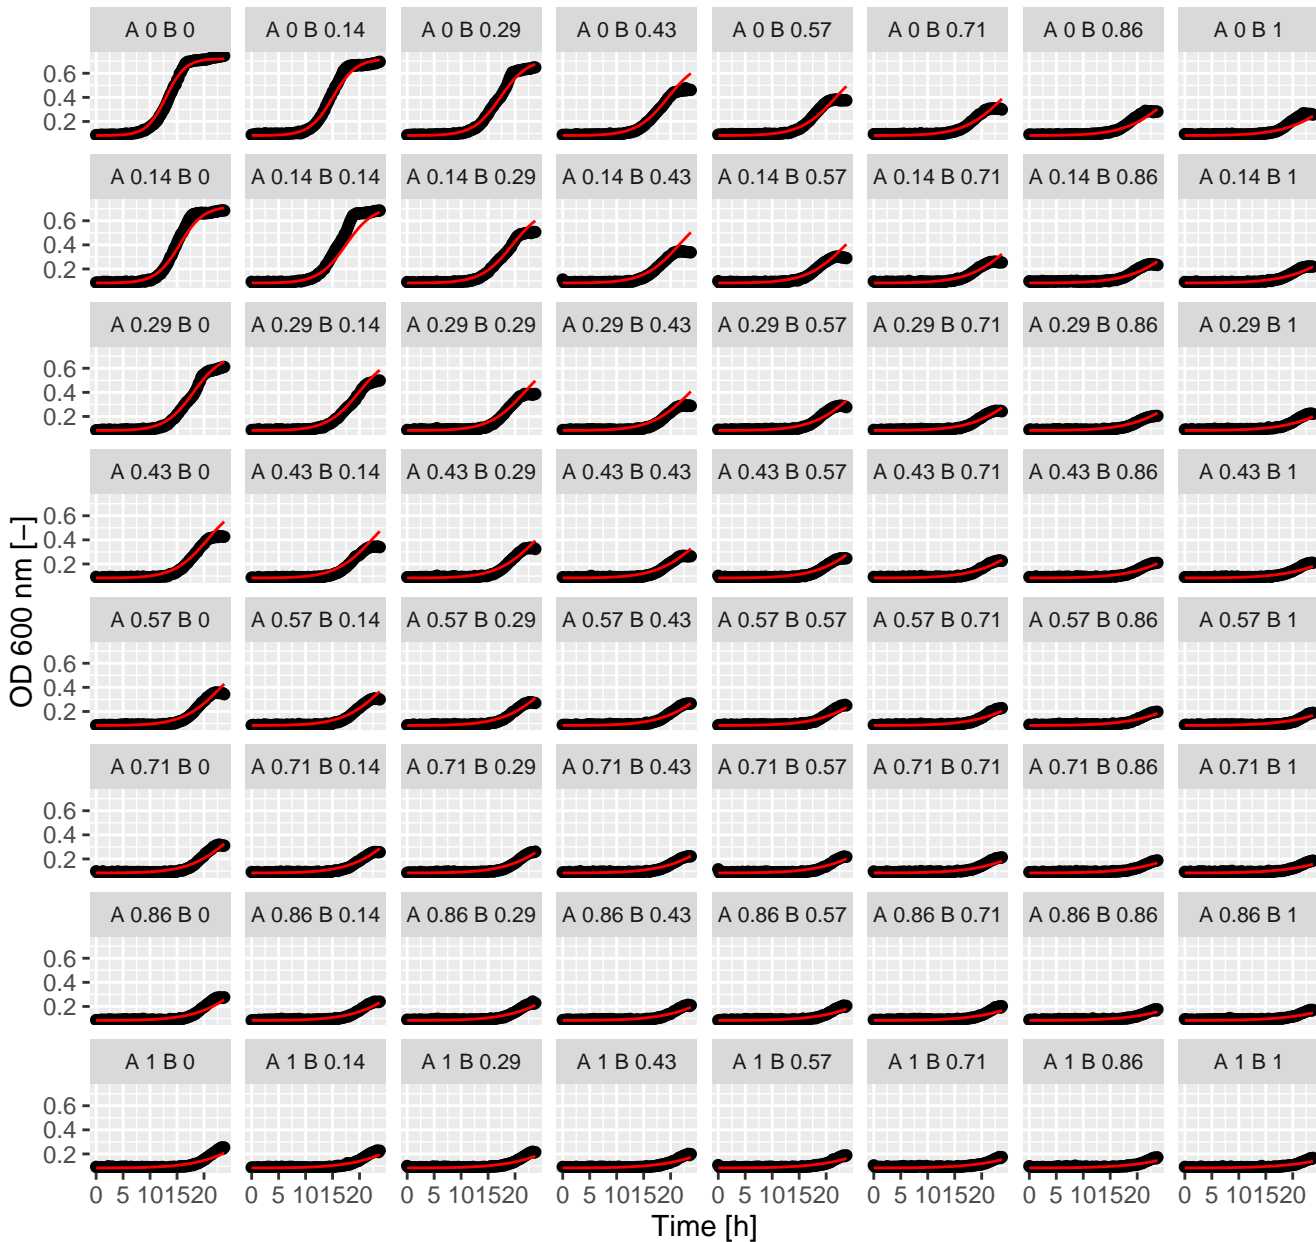

Ter.Tun (= Ax.Bx) exp. additivity (LA)  
Int\_AB = 0 and Int\_BA = 0 at EC50

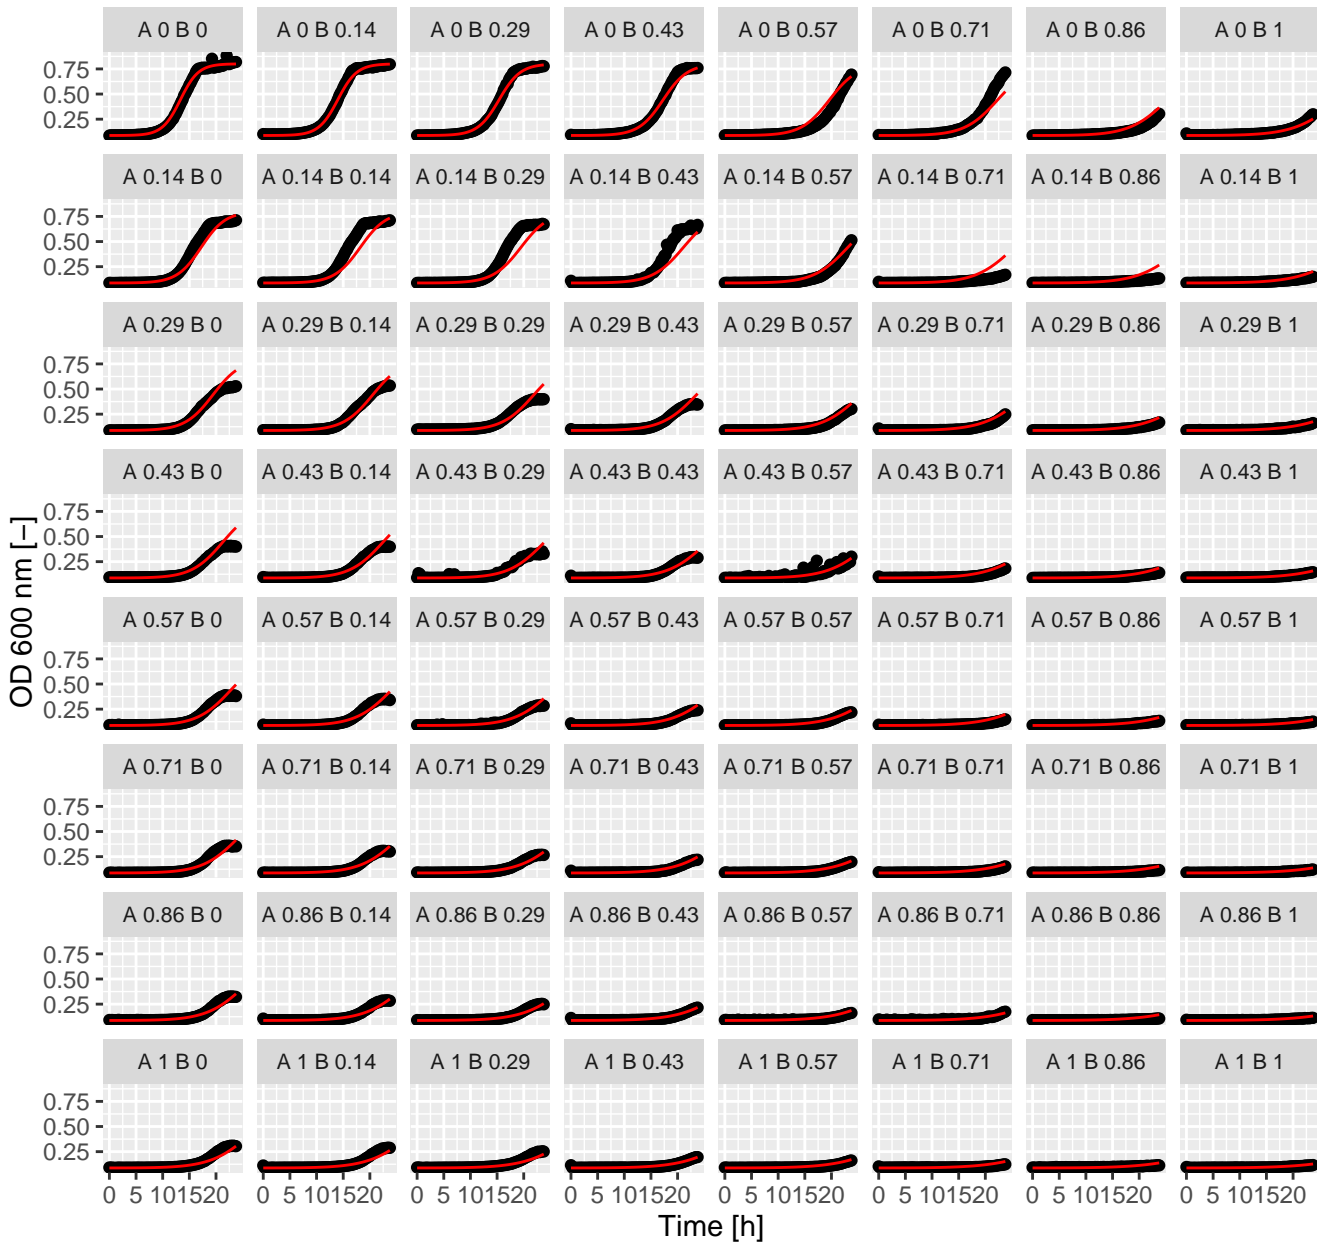

Ter.Tun (= Ax.Bx) full GPDI  
Int\_AB = 1.94 and Int\_BA = -0.44 at EC50

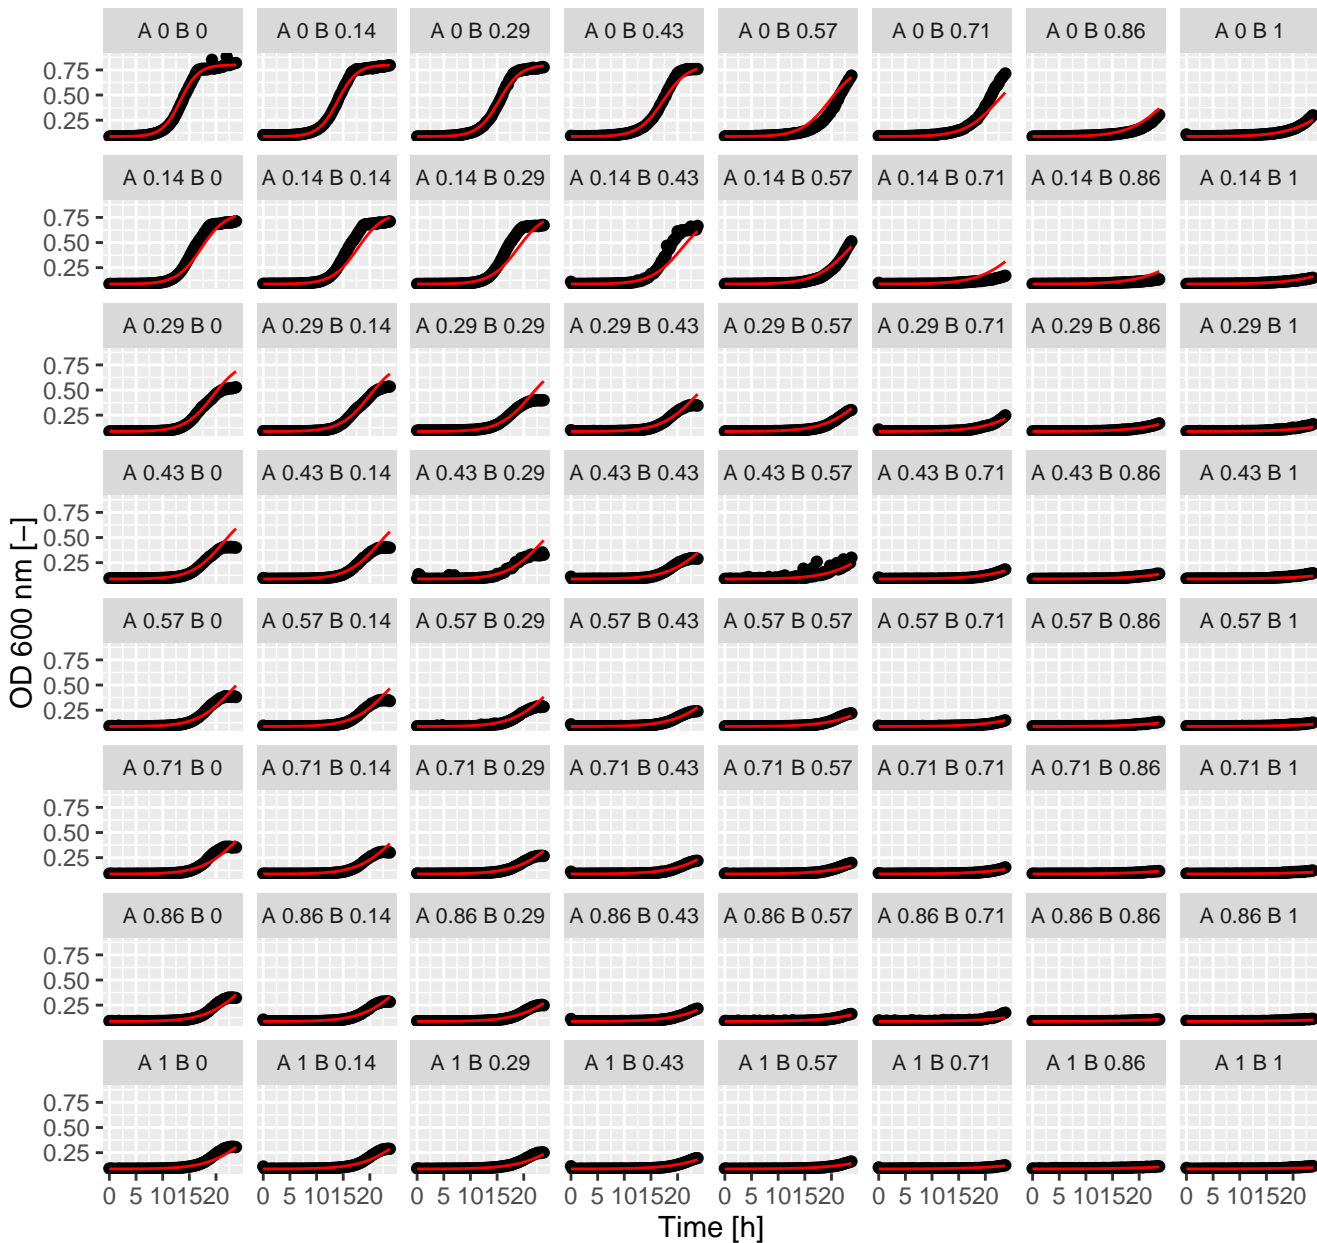



5FU.5FU (= Ax.Bx) exp. additivity (BI)  
Int\_AB = 0 and Int\_BA = 0 at EC50

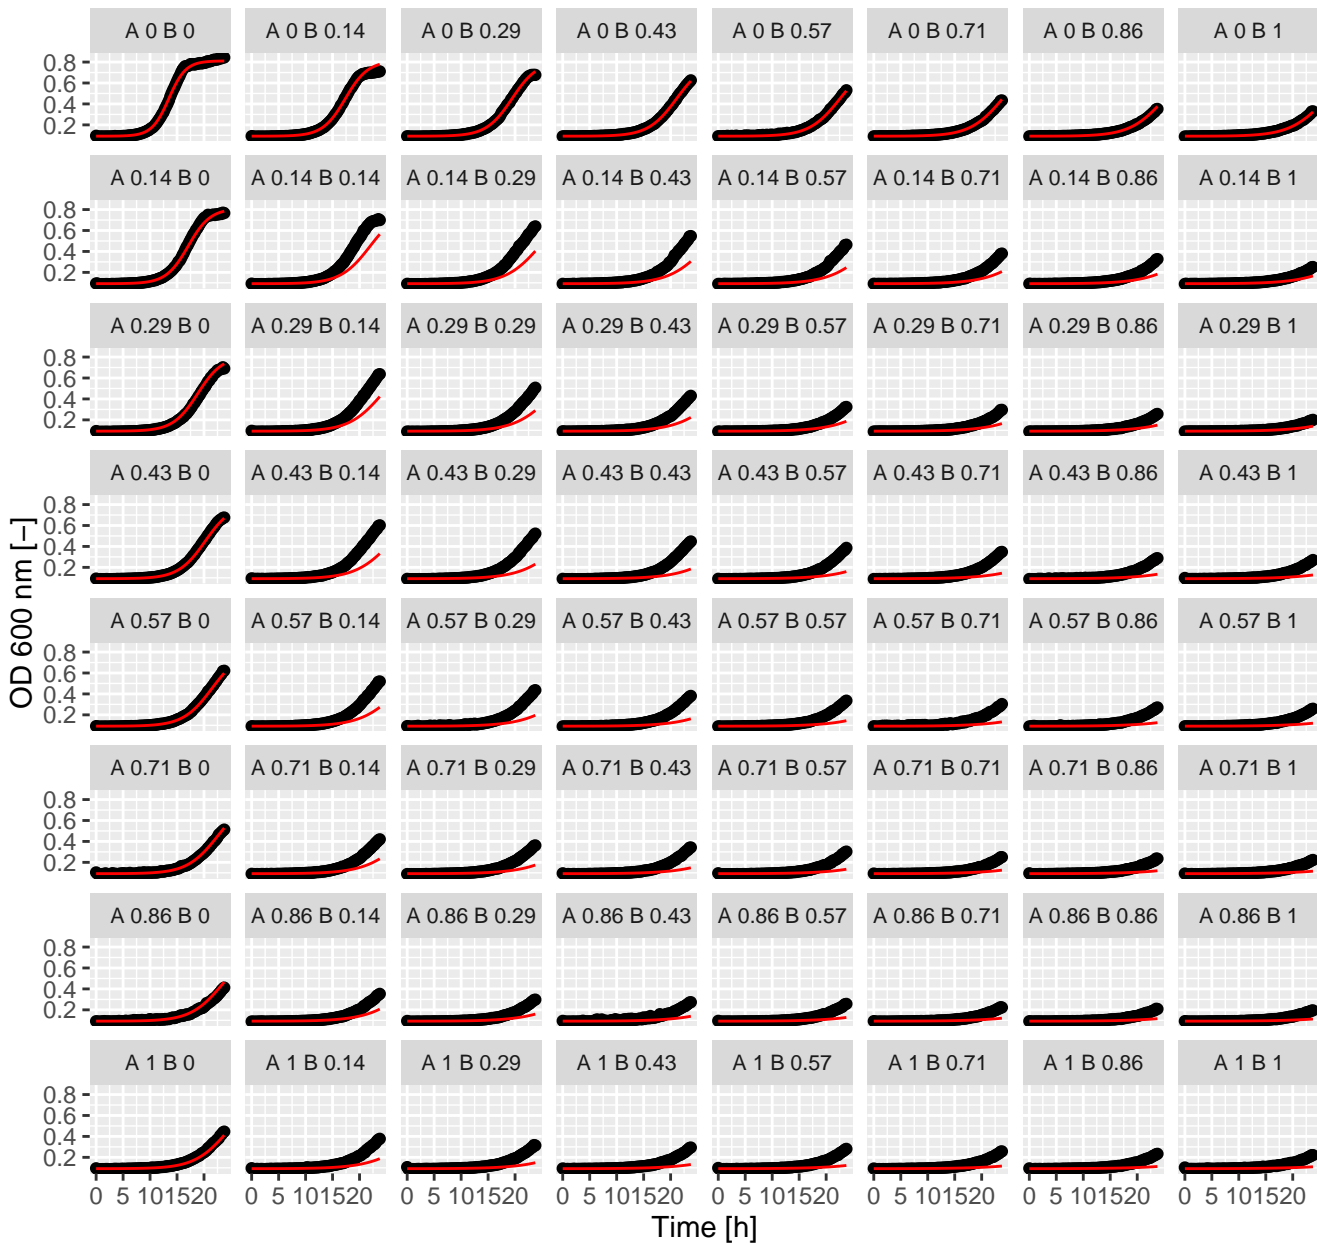

5FU.5FU (= Ax.Bx) full GPDI  
Int\_AB = 4.12 and Int\_BA = 0.41 at EC50

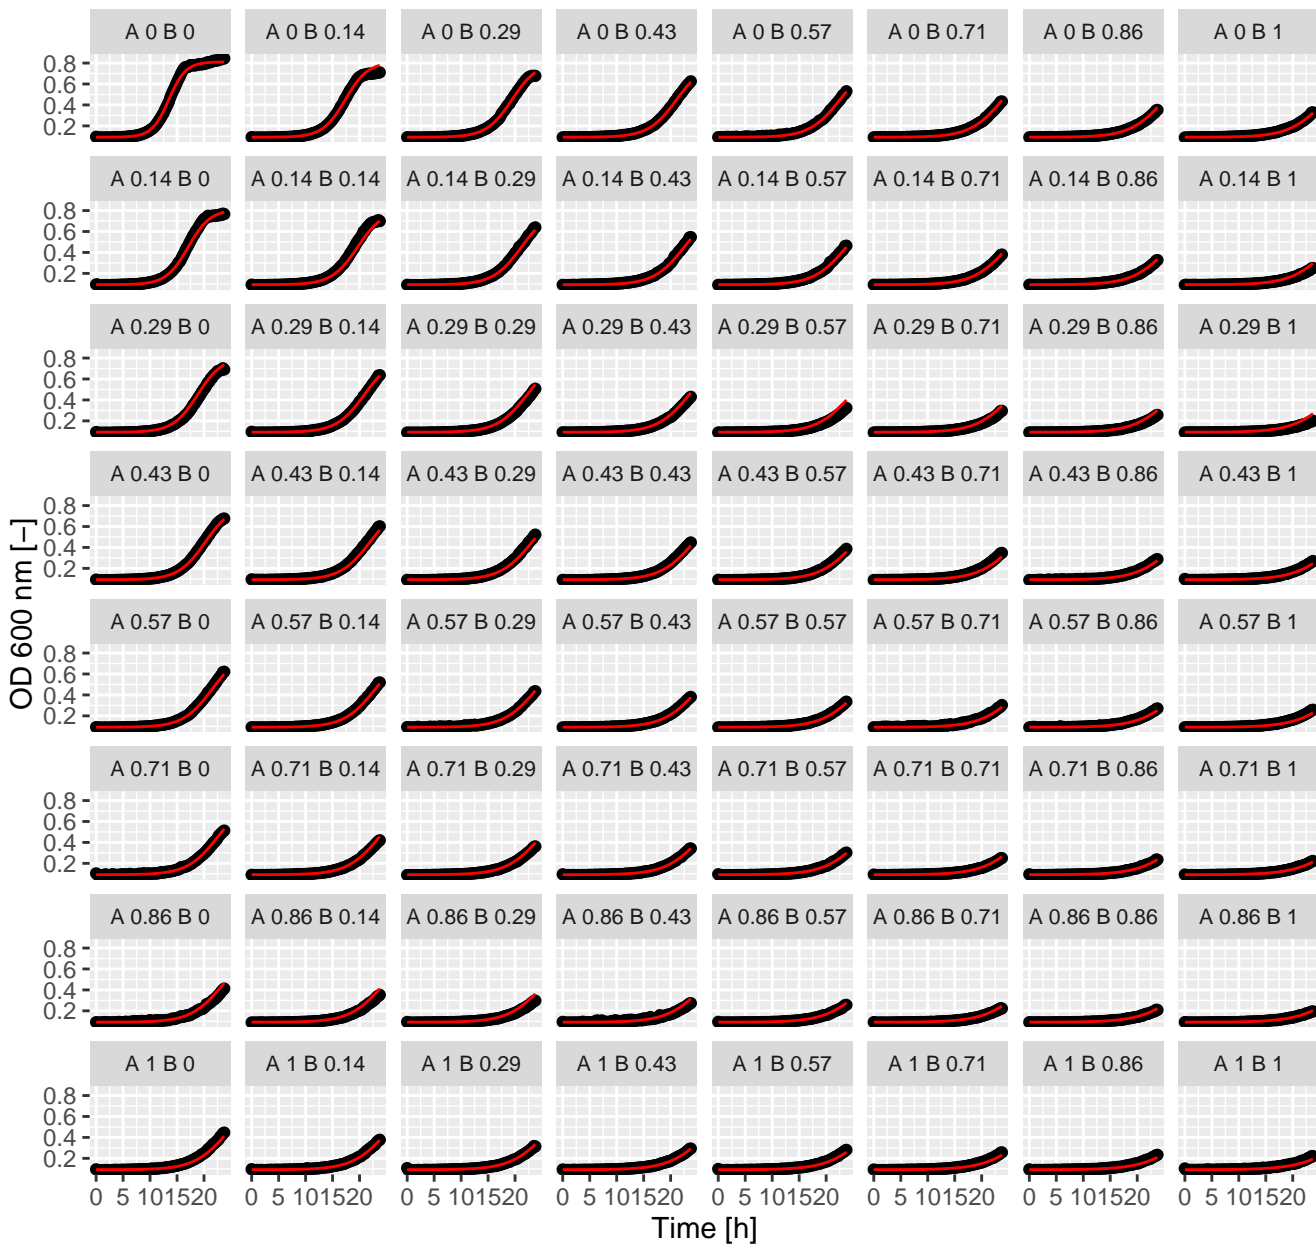

Tun.Tun (= Ax.Bx) exp. additivity (BI)  
Int\_AB = 0 and Int\_BA = 0 at EC50

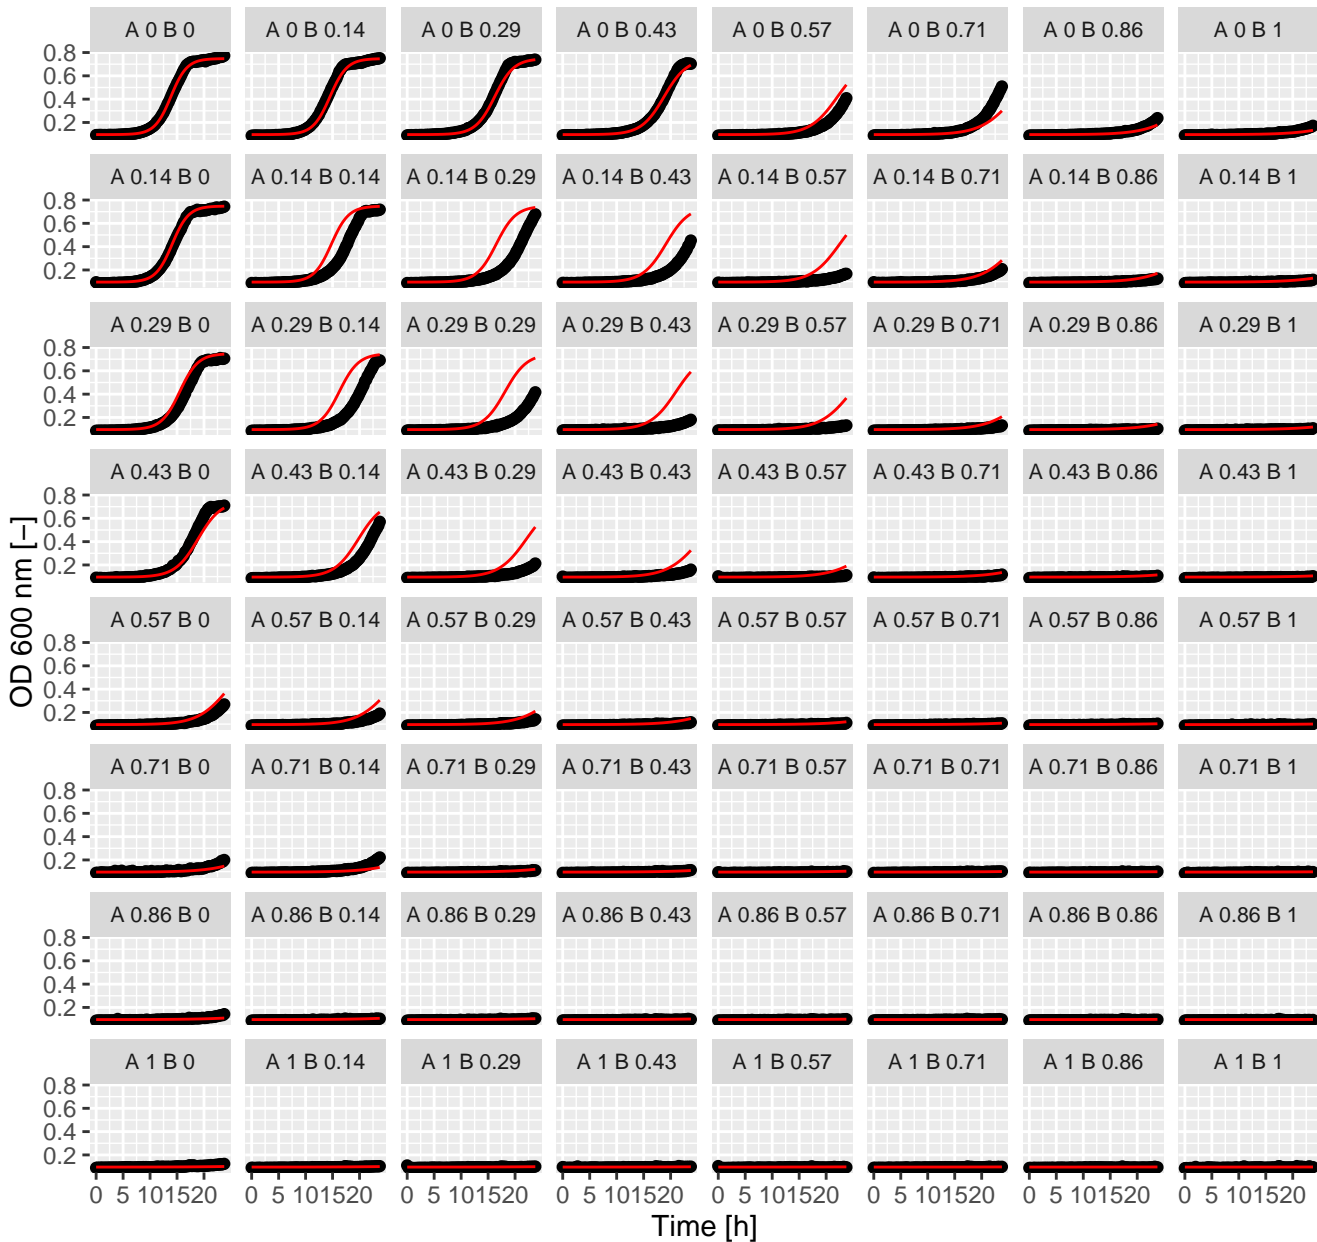

Tun.Tun (= Ax.Bx) full GPDI  
 Int\_AB = -0.07 and Int\_BA = -0.51 at EC50

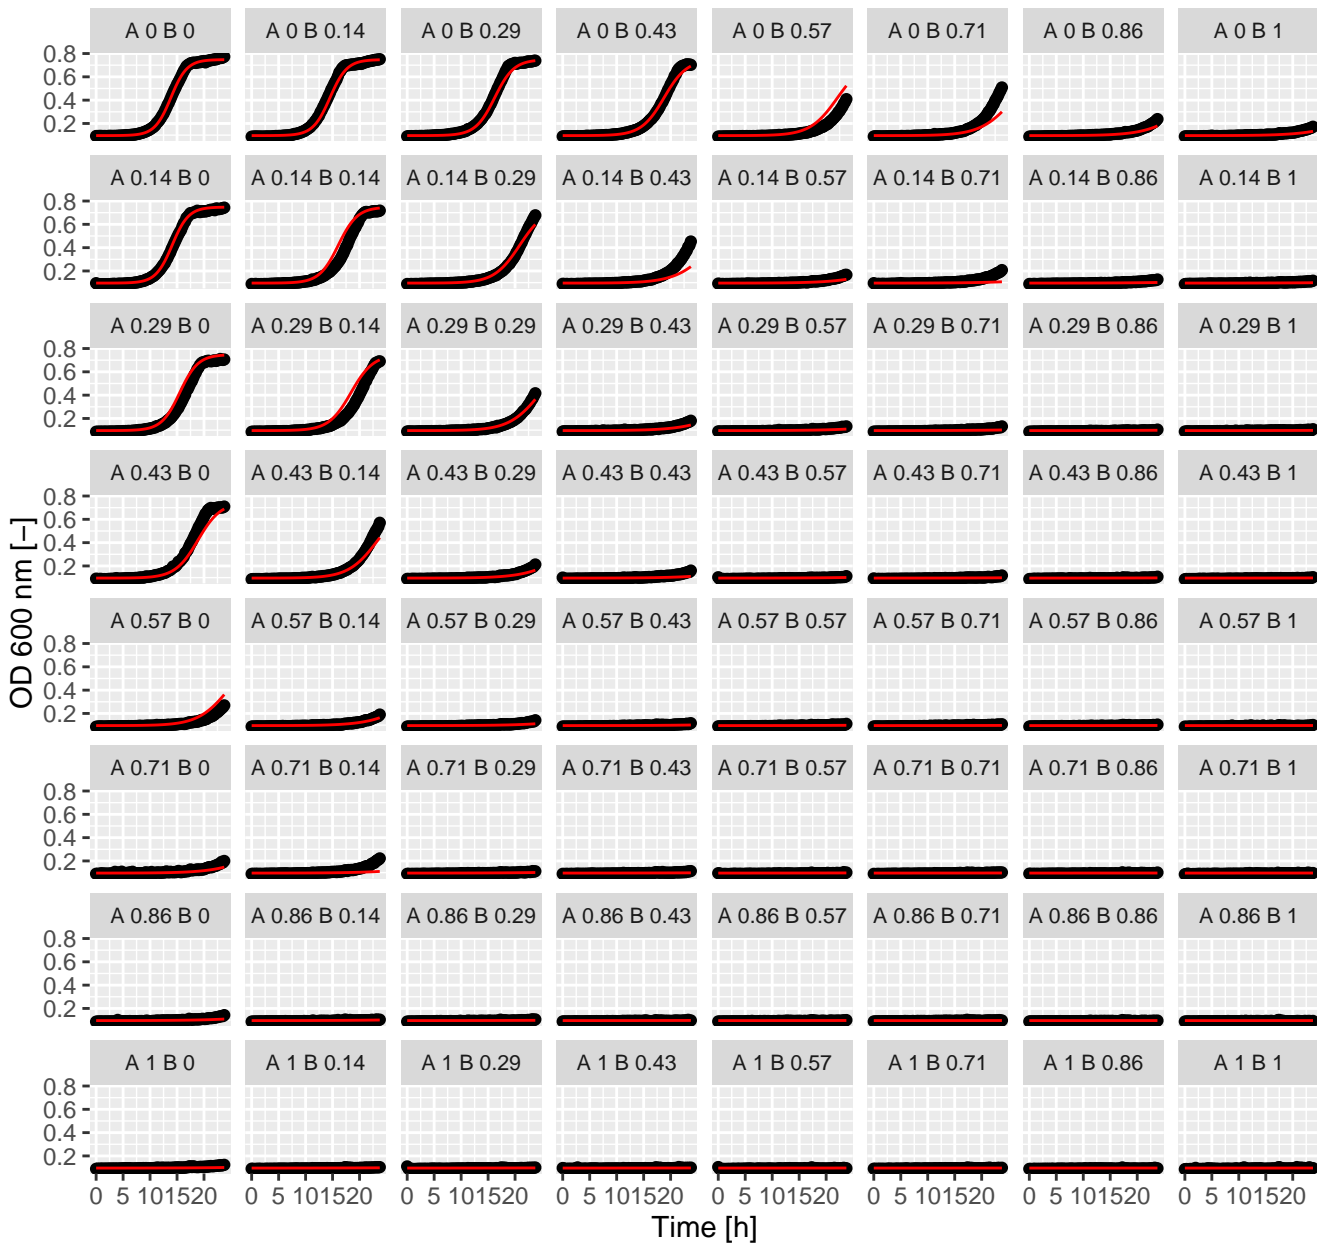

Ter.Tun (= Ax.Bx) exp. additivity (BI)  
Int\_AB = 0 and Int\_BA = 0 at EC50

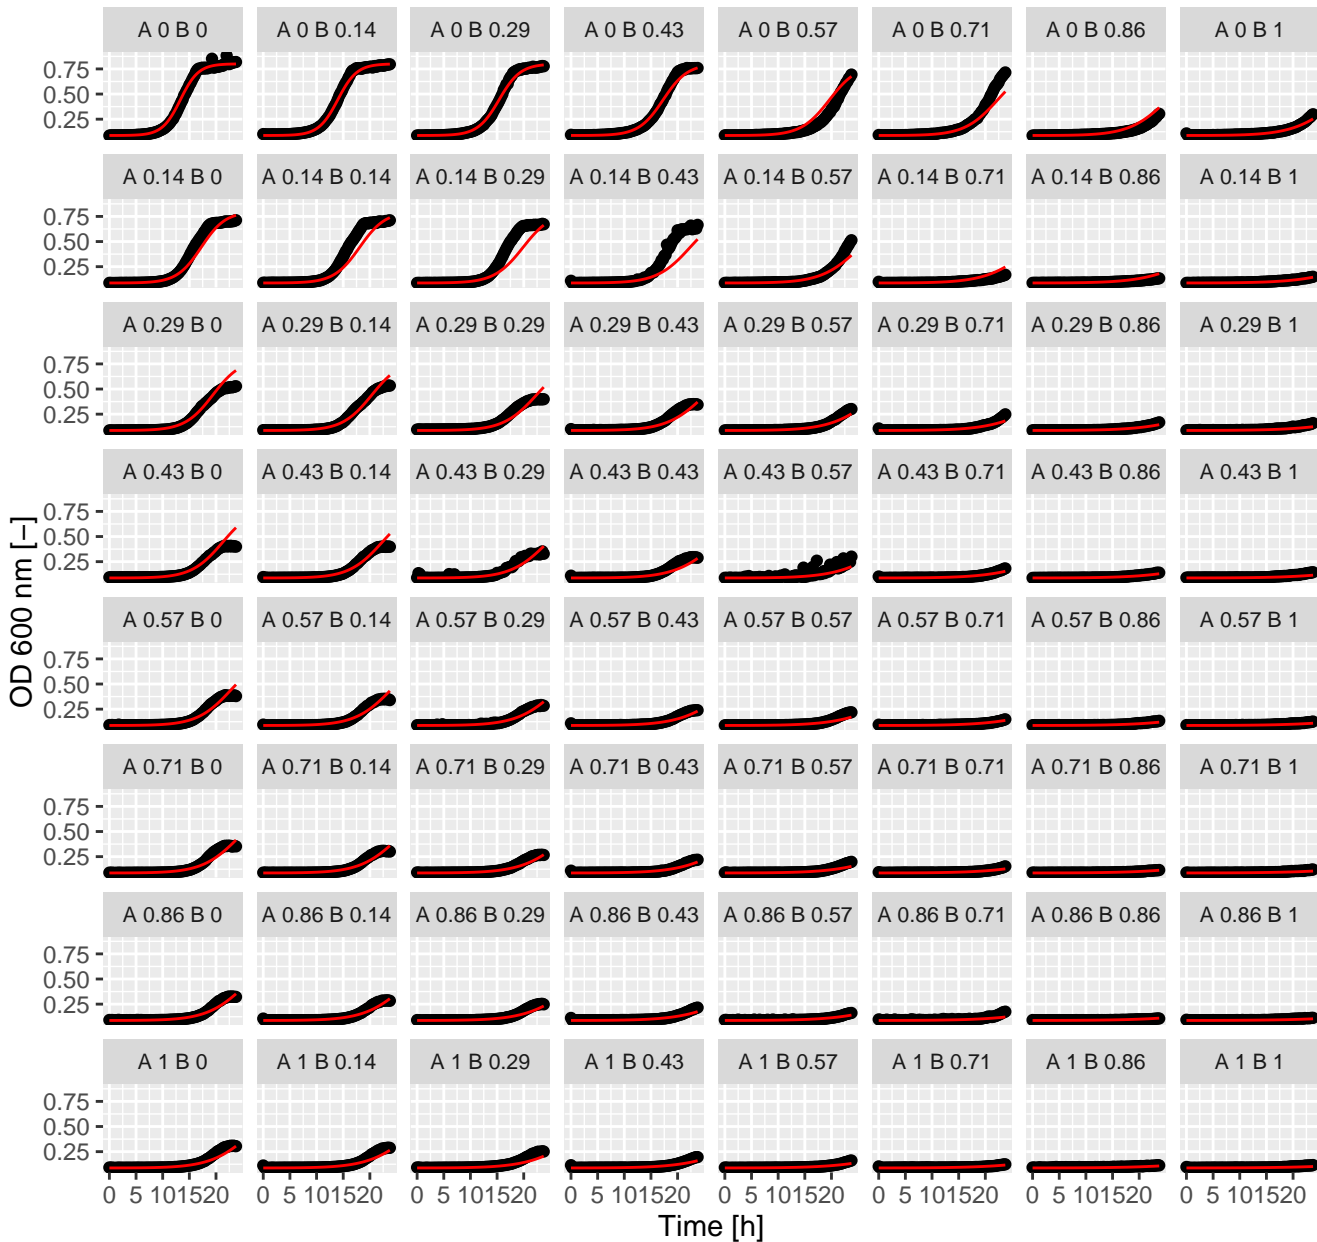

Ter.Tun (= Ax.Bx) full GPDI  
Int\_AB = 0.14 and Int\_BA = 0.13 at EC50

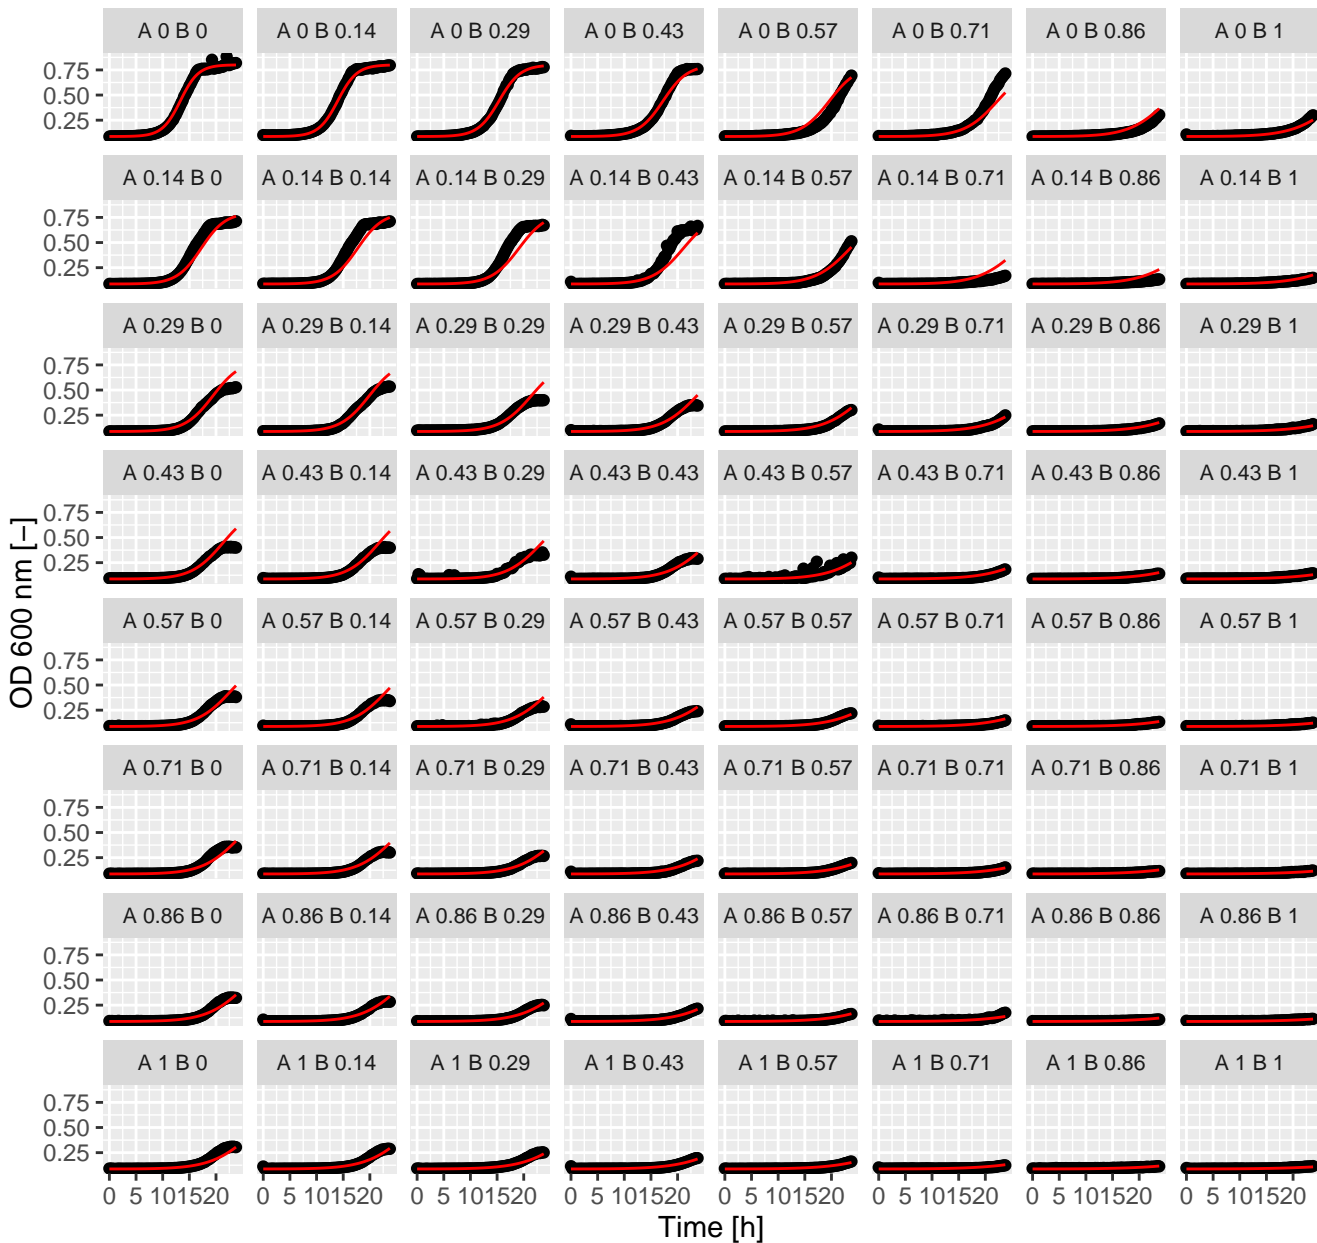

Ter.Ter (= Ax.Bx) exp. additivity (BI)  
 Int\_AB = 0 and Int\_BA = 0 at EC50

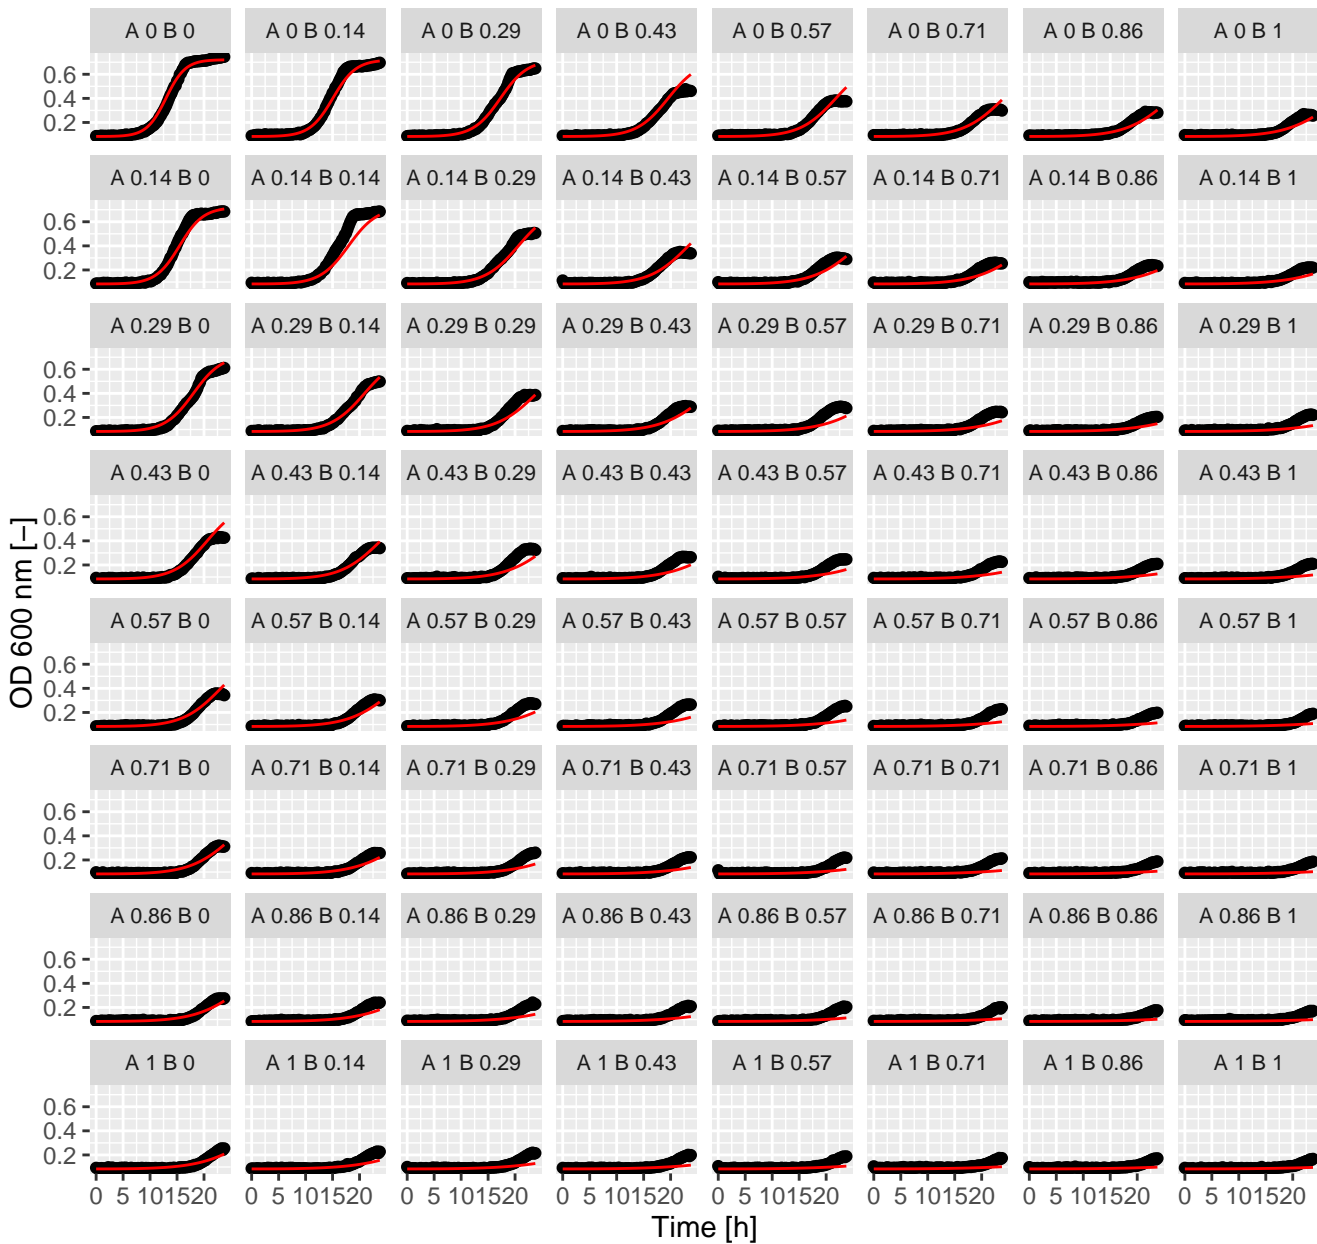

Ter.Ter (= Ax.Bx) full GPDI  
Int\_AB = 0.52 and Int\_BA = 0.46 at EC50

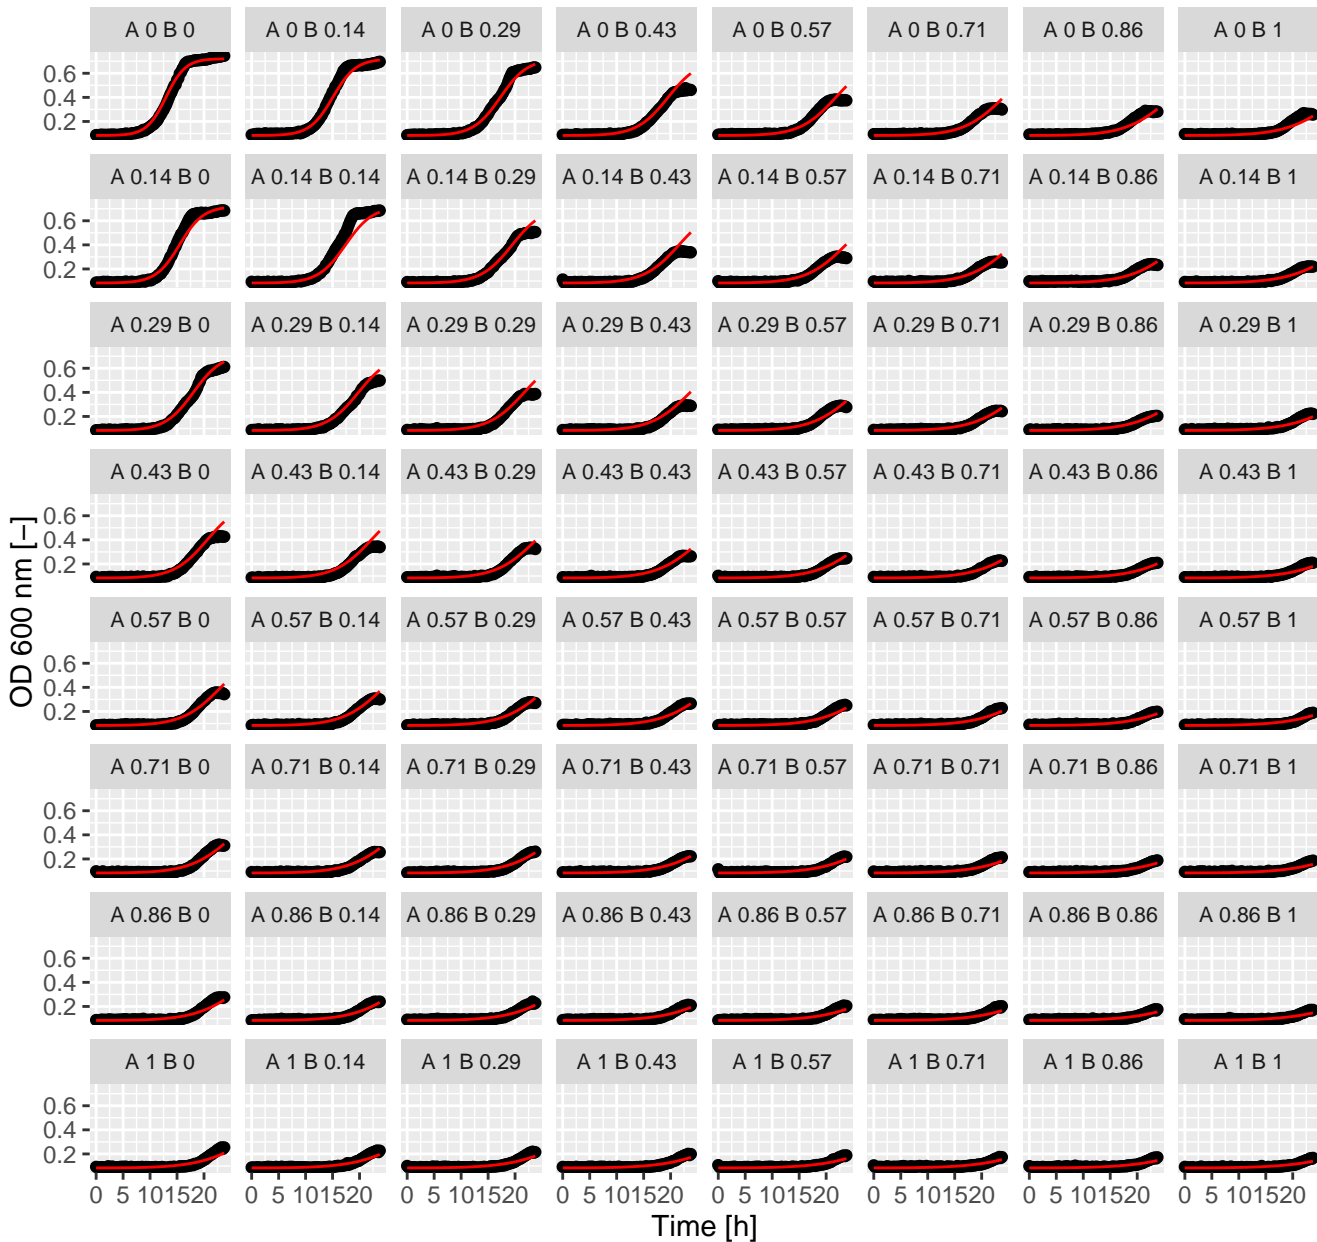



Tam.Ter (= Ax.Bx) exp. additivity (BI)  
Int\_AB = 0 and Int\_BA = 0 at EC50

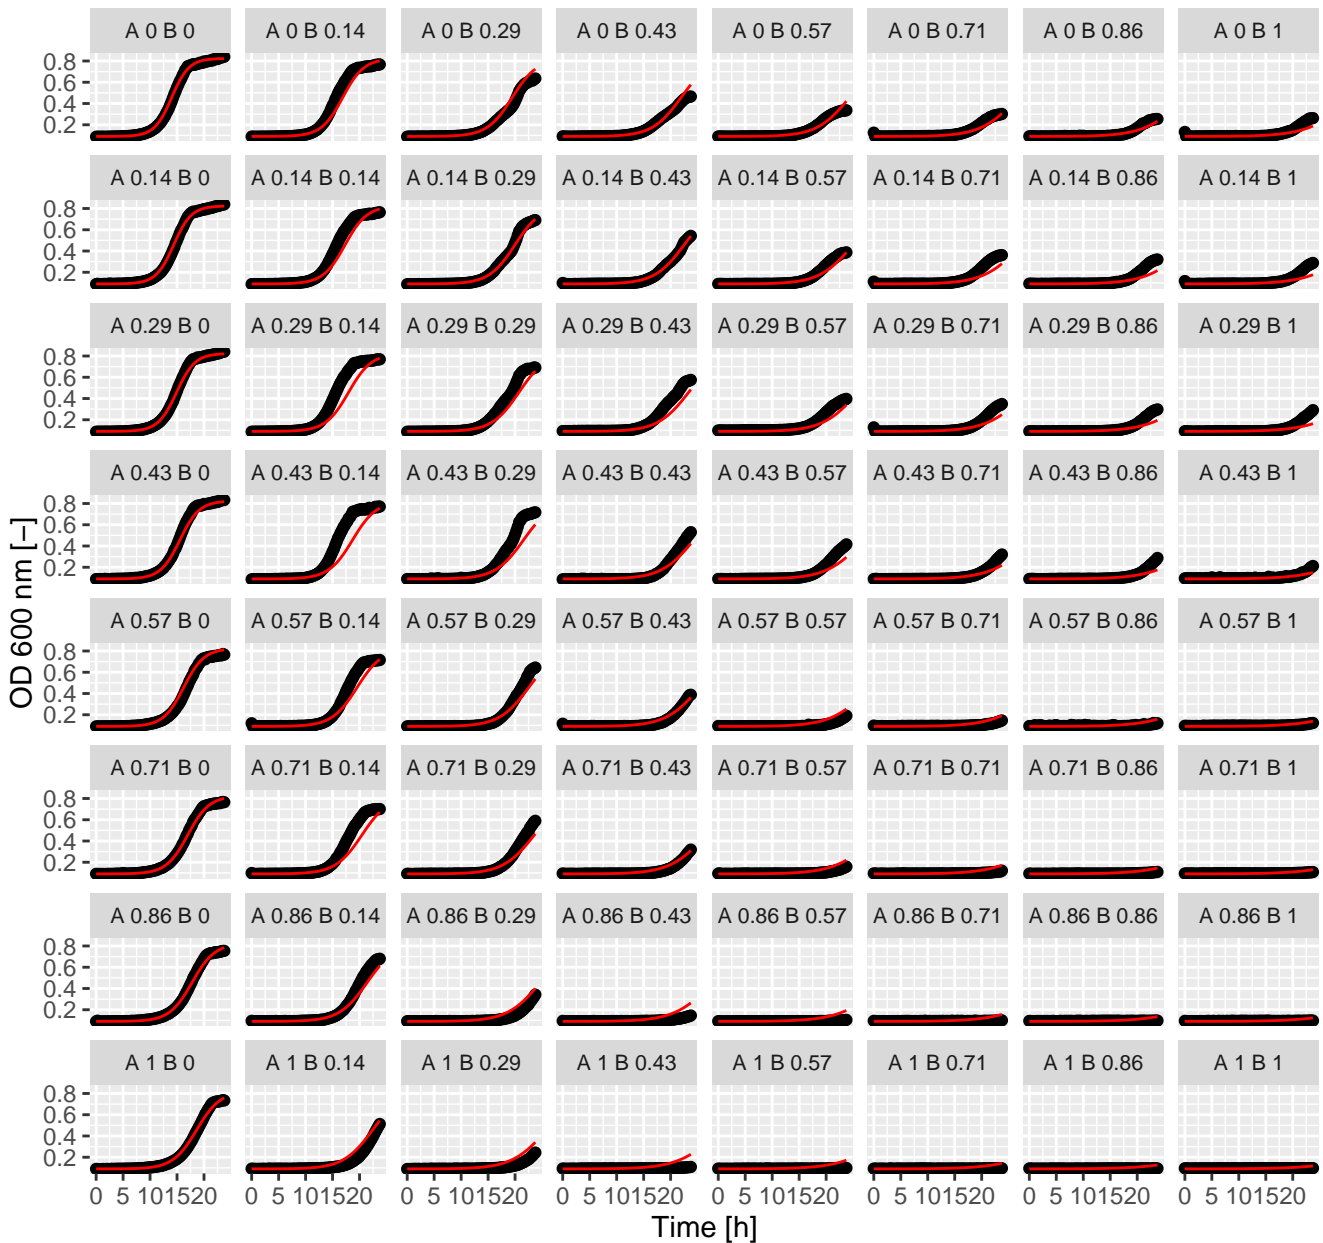

Tam.Ter (= Ax.Bx) full GPDI  
Int\_AB = -0.68 and Int\_BA = 8.79 at EC50

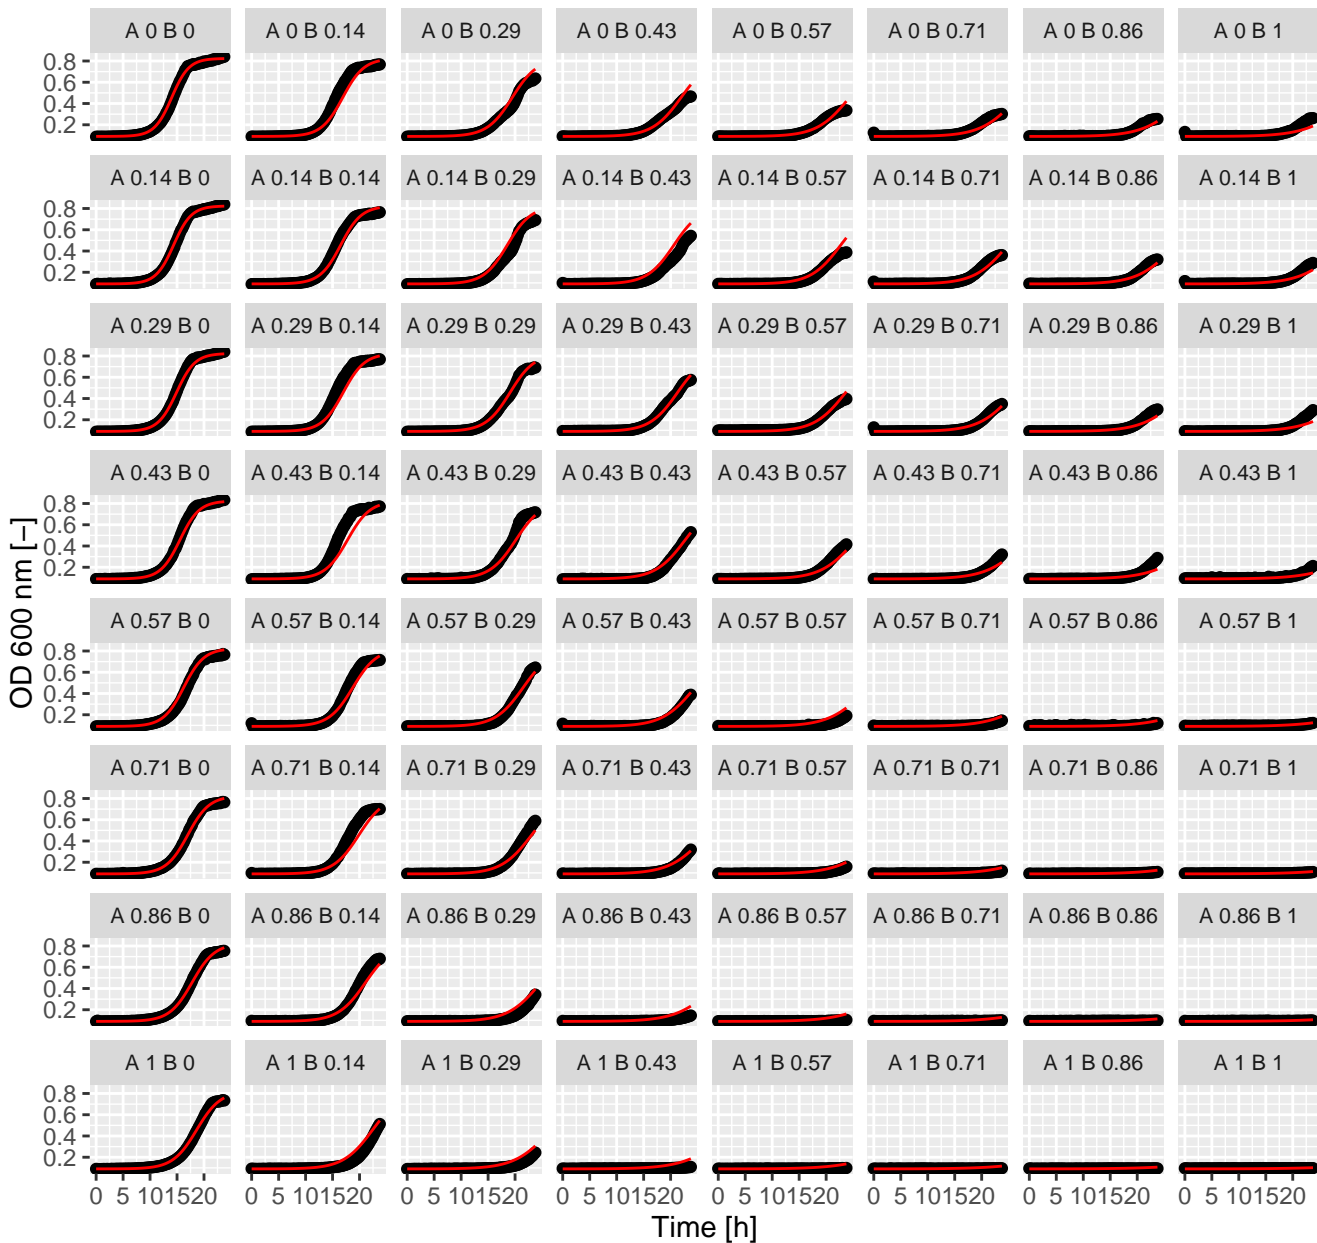

Tam.Tam (= Ax.Bx) exp. additivity (BI)  
Int\_AB = 0 and Int\_BA = 0 at EC50

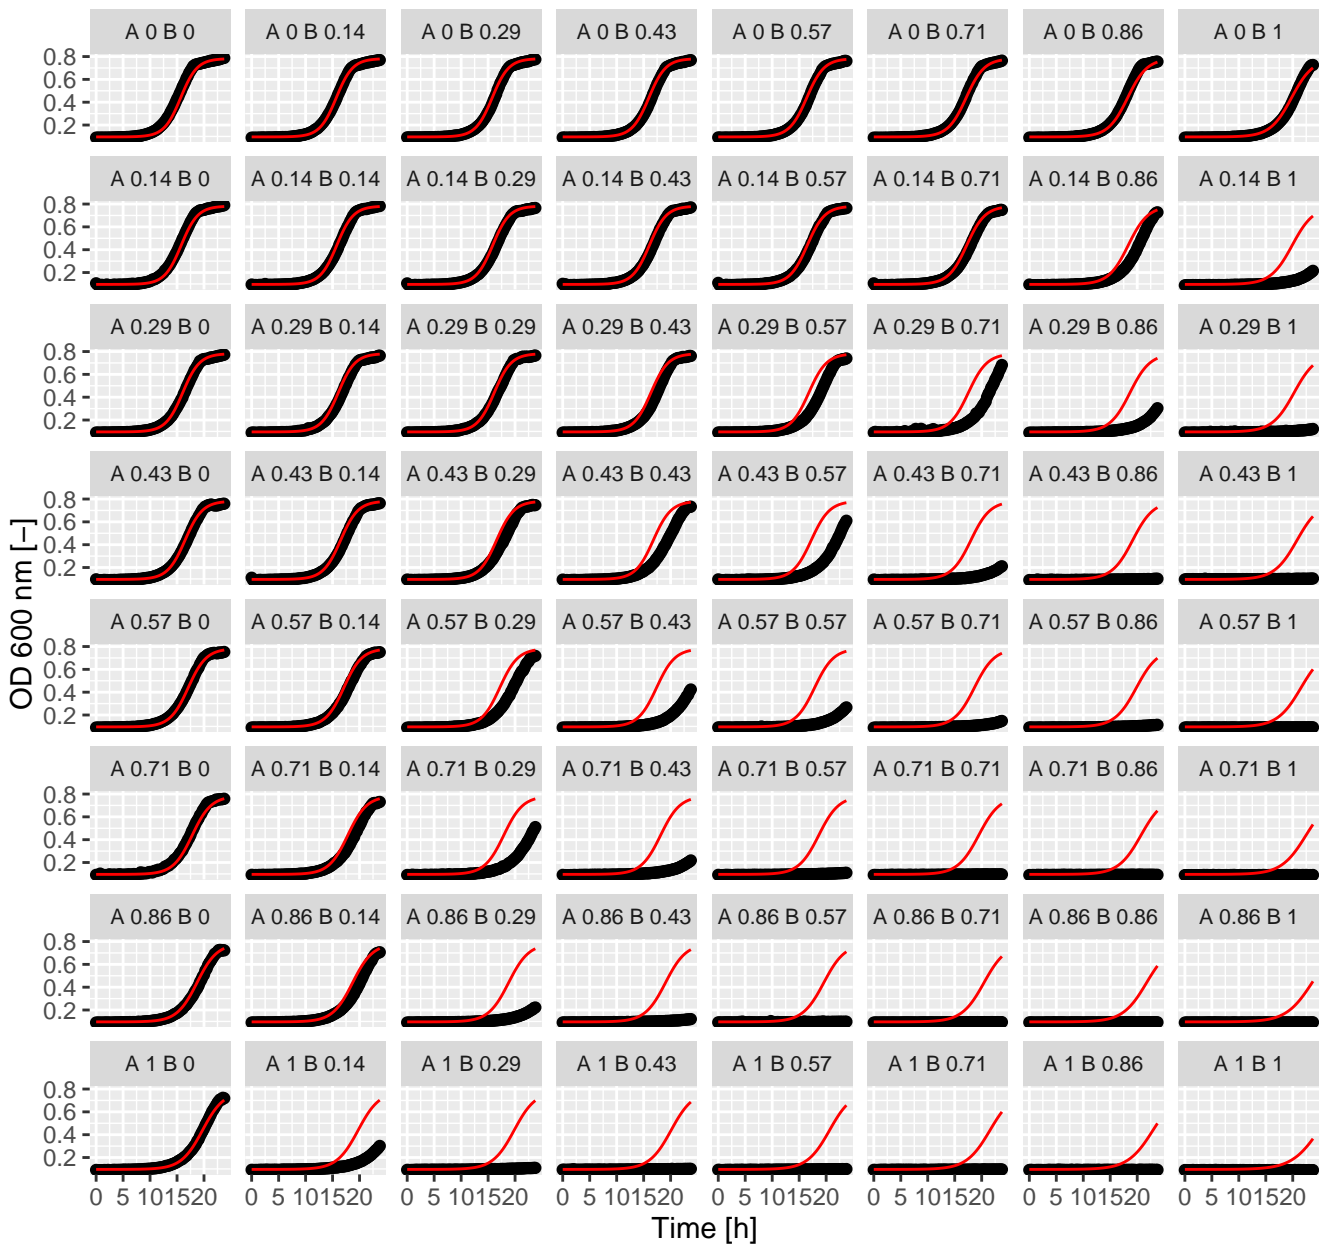

Tam.Tam (= Ax.Bx) full GPDI  
 Int\_AB = -0.63 and Int\_BA = -0.73 at EC50

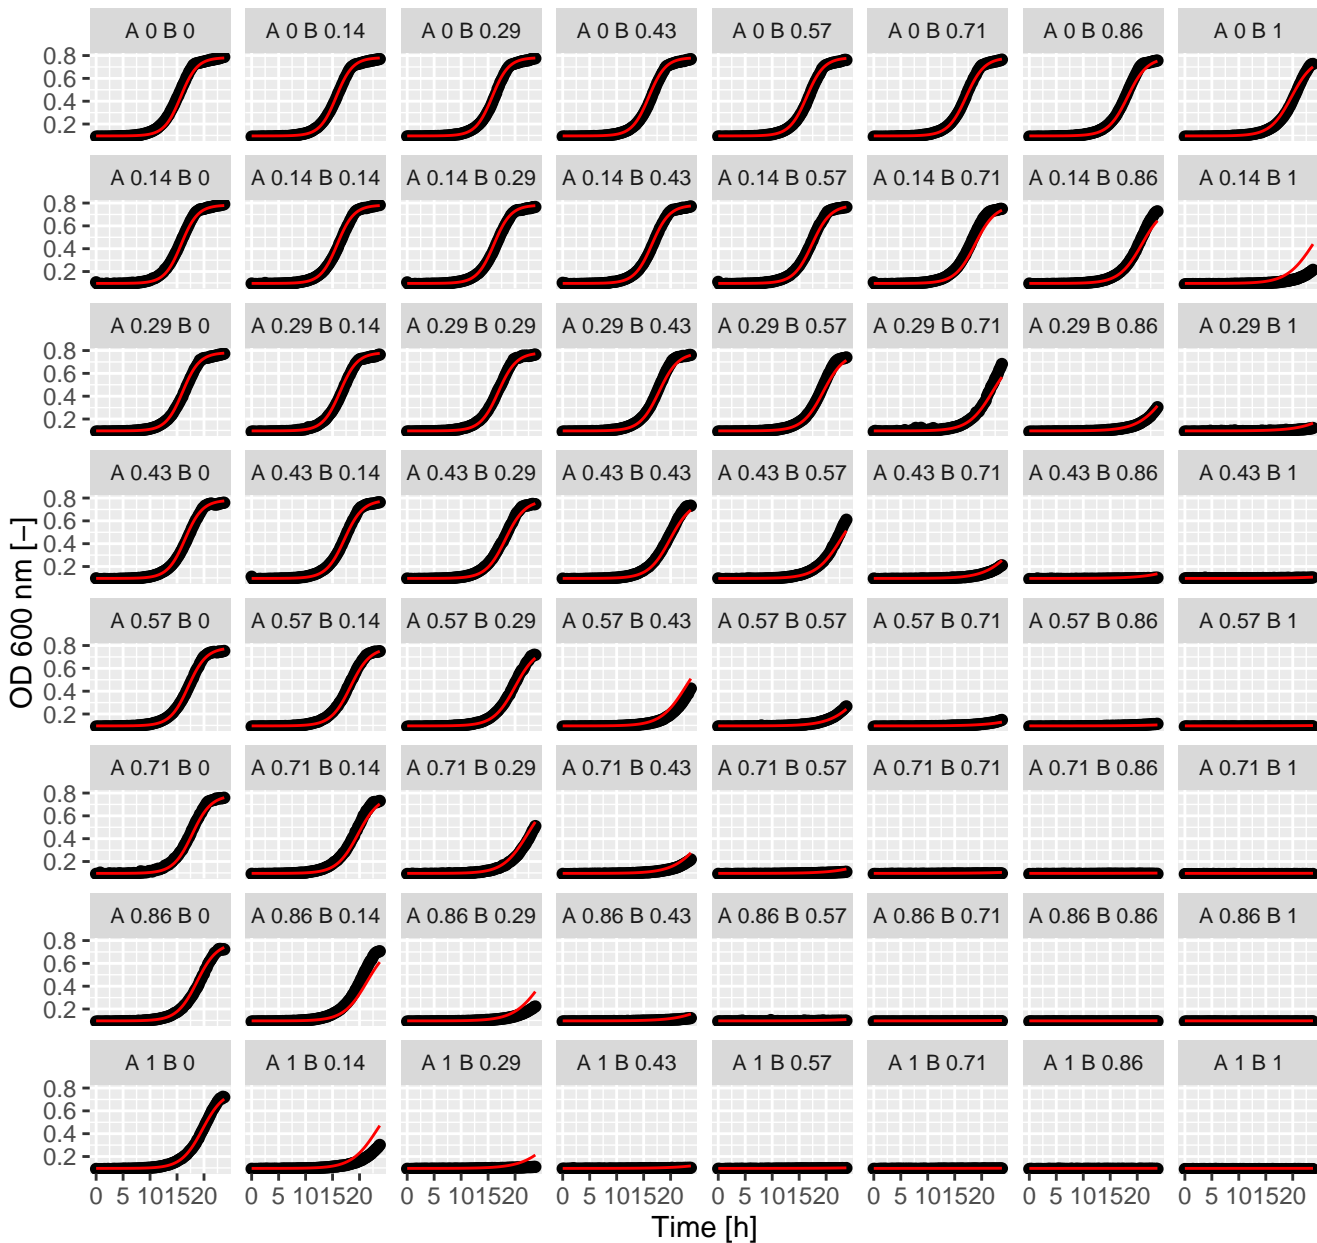

Tac.Tun (= Ax.Bx) exp. additivity (BI)  
 Int\_AB = 0 and Int\_BA = 0 at EC50

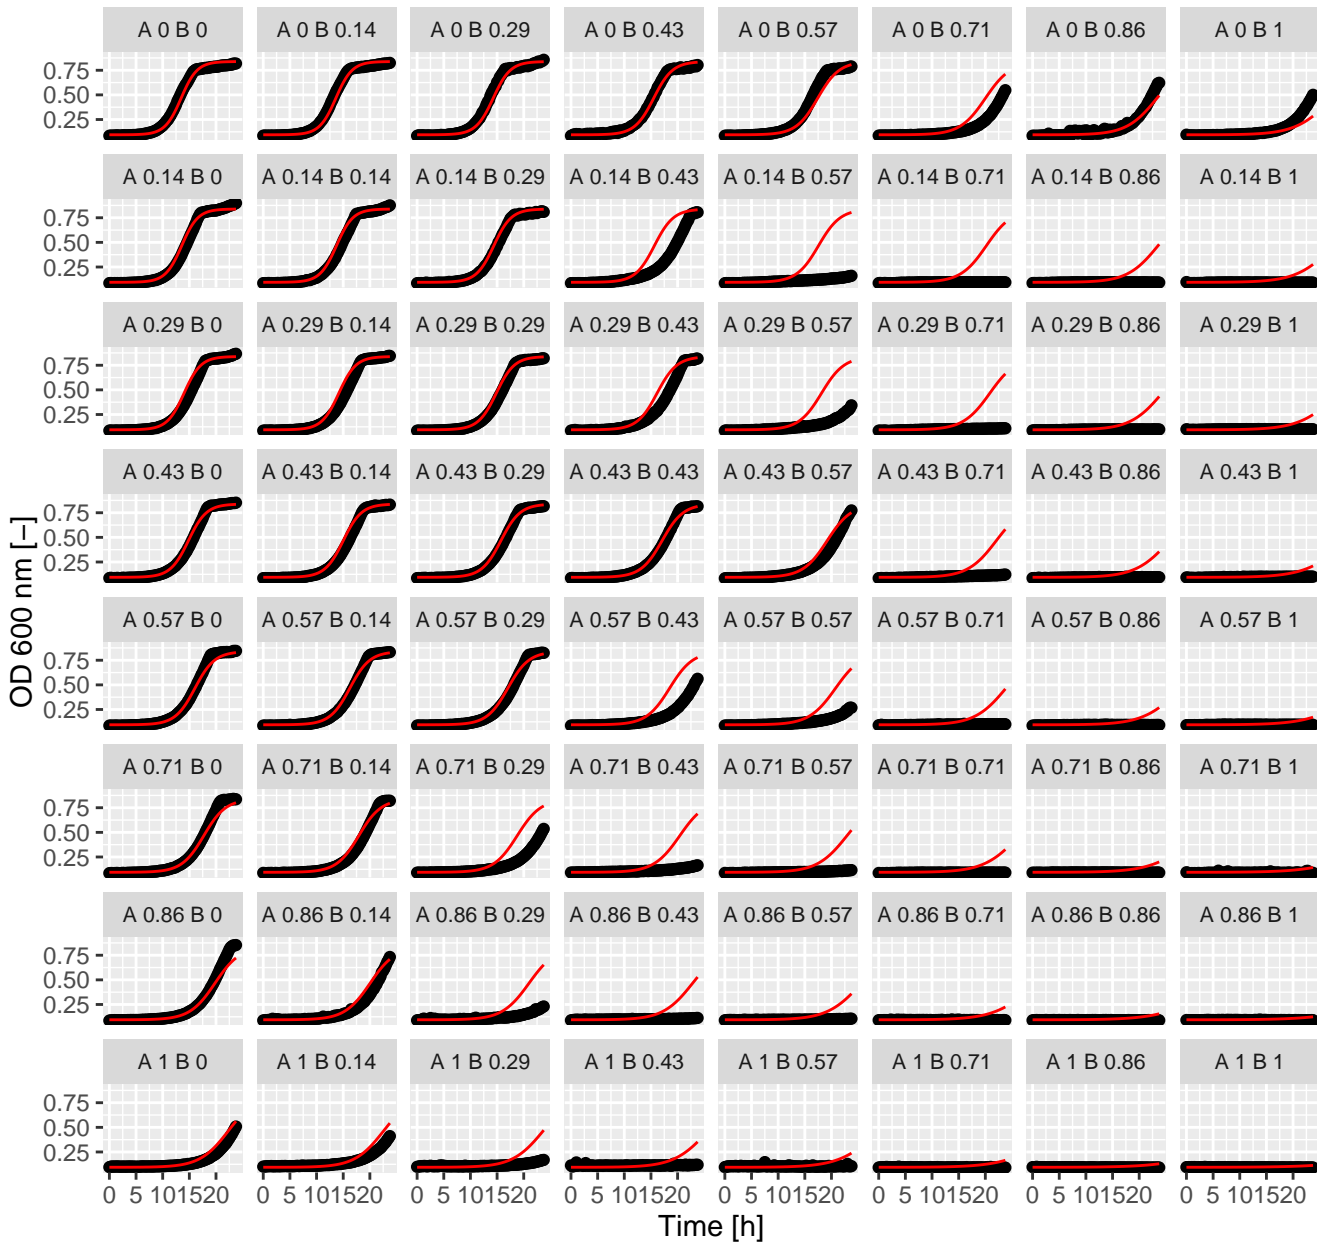

Tac.Tun (= Ax.Bx) full GPDl  
 Int\_AB = -0.12 and Int\_BA = -0.31 at EC50

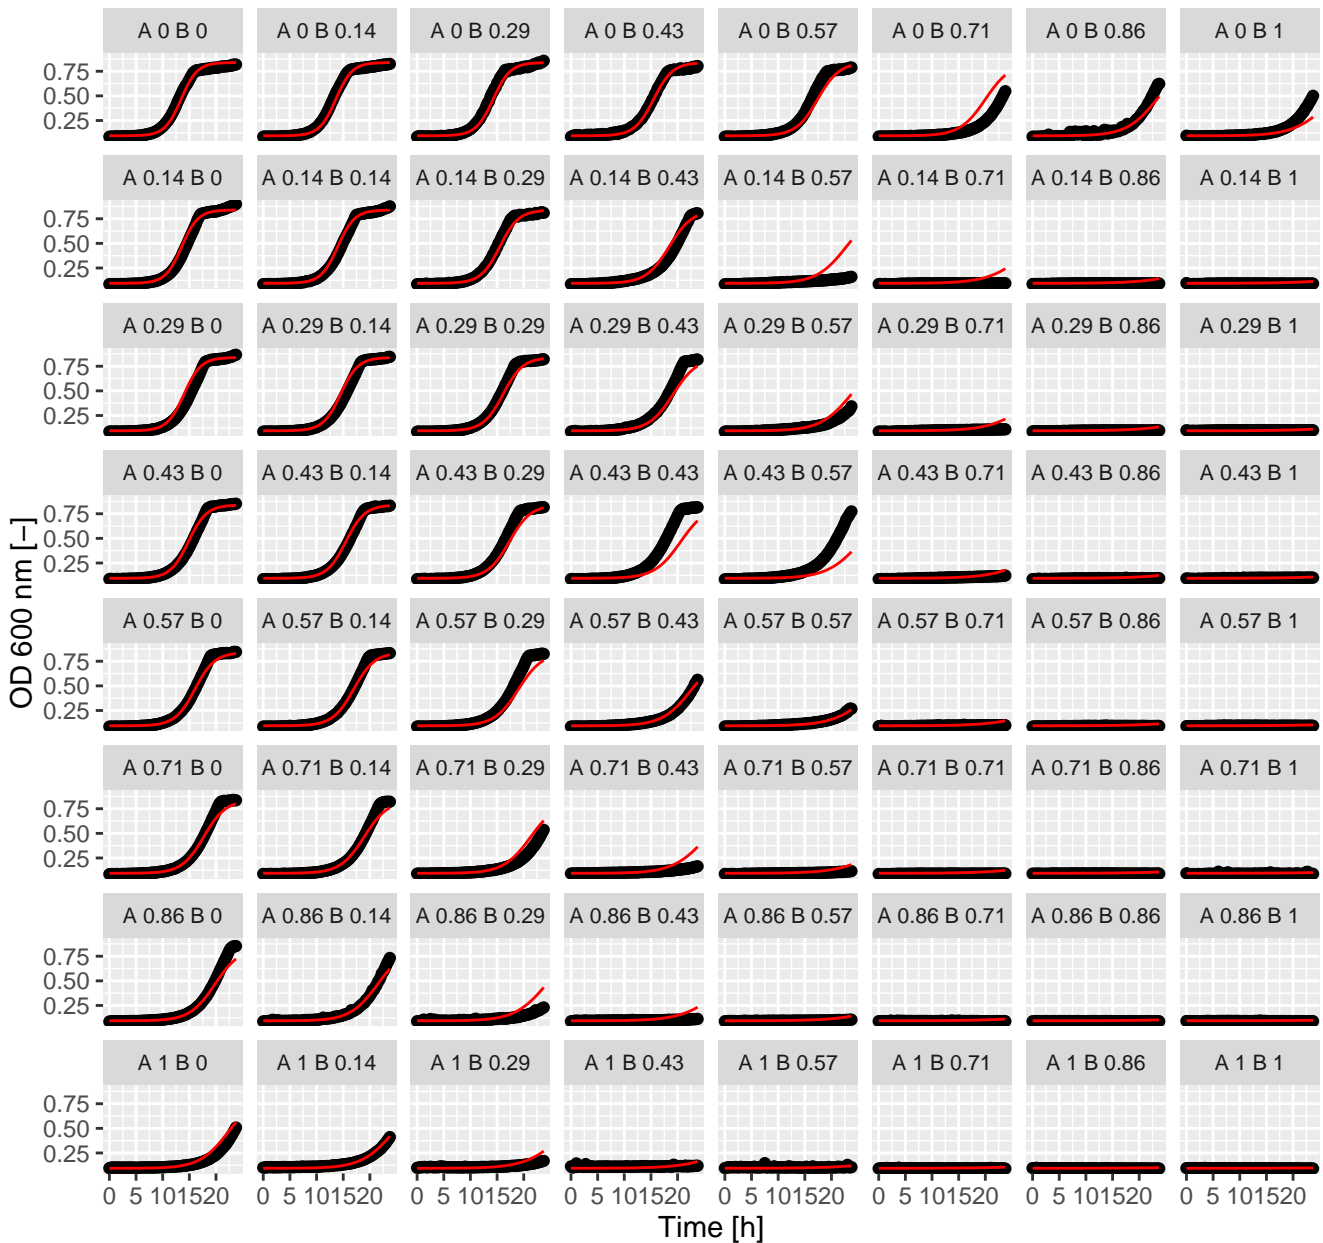

Tac.Ter (= Ax.Bx) exp. additivity (BI)  
 Int\_AB = 0 and Int\_BA = 0 at EC50

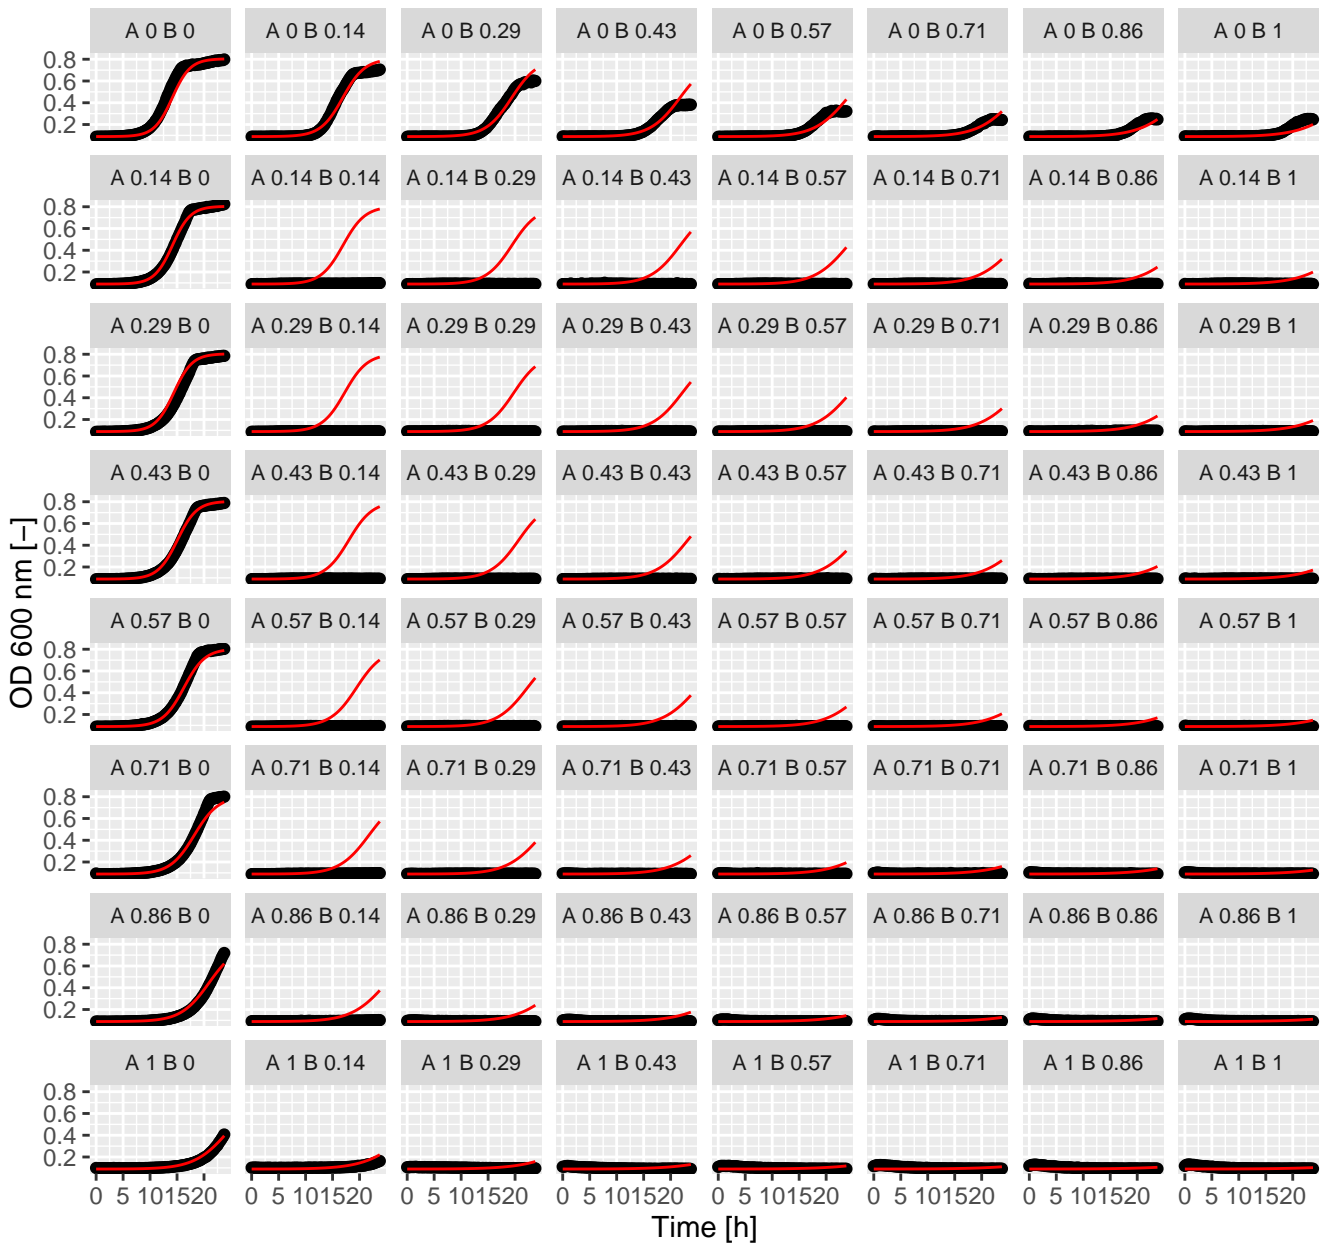

Tac.Ter (= Ax.Bx) full GPDI  
 Int\_AB = 22.83 and Int\_BA = -0.94 at EC50

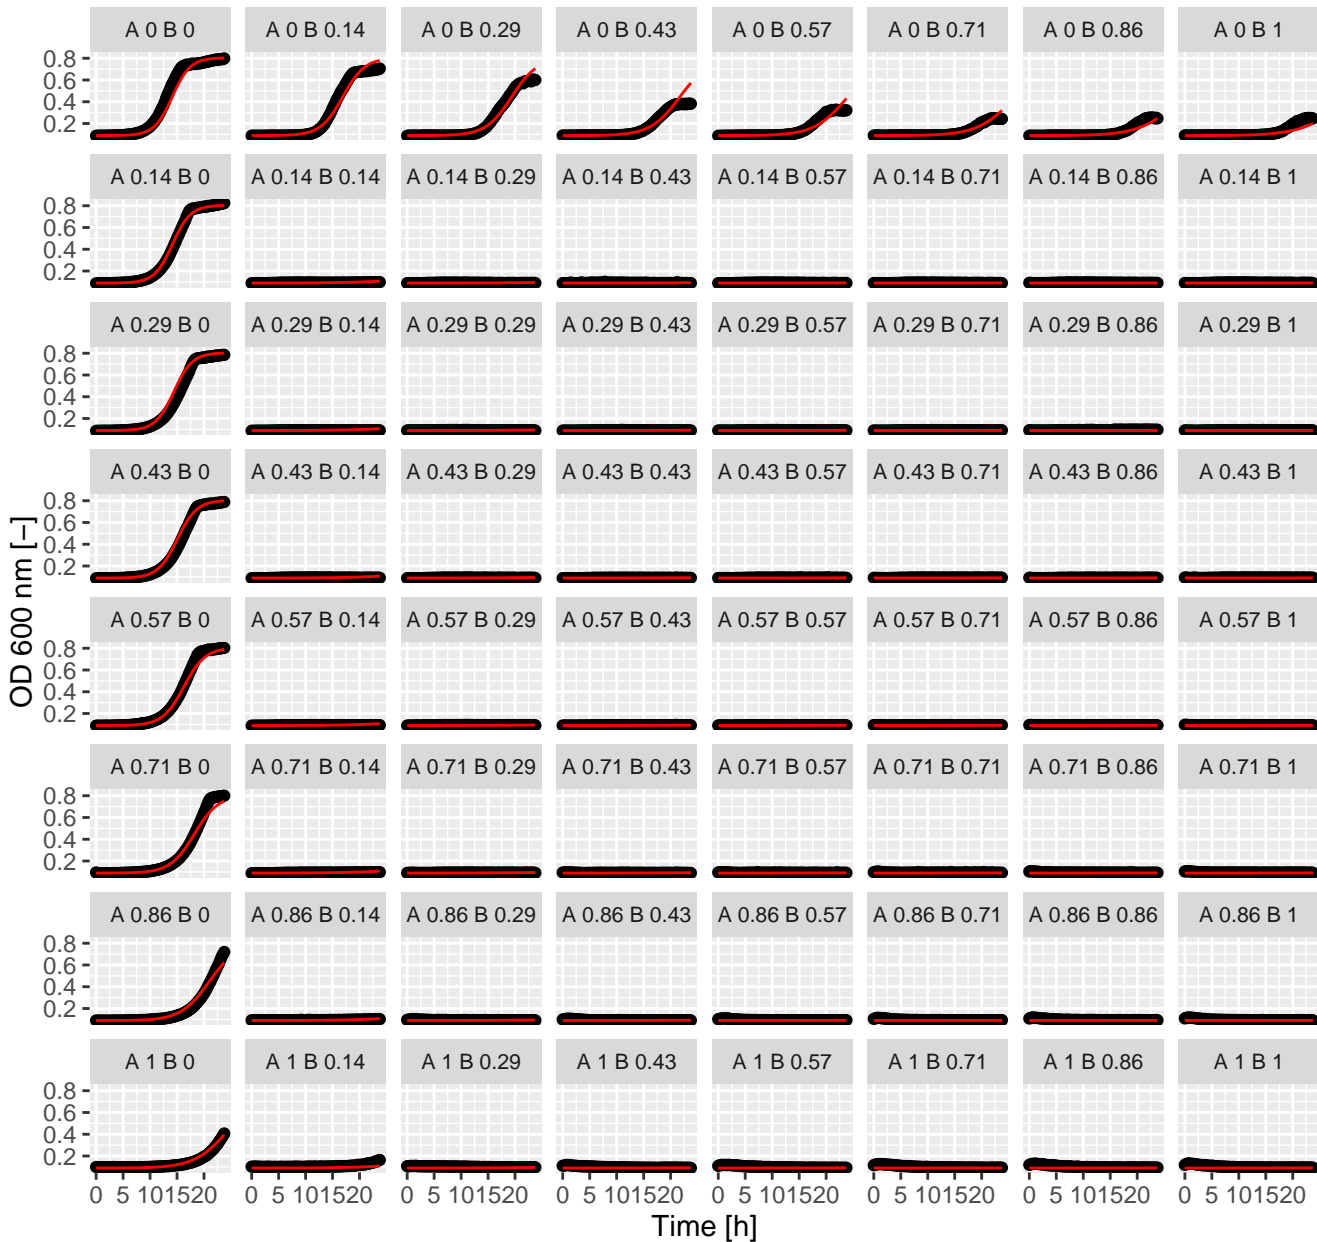



Tac.Tam (= Ax.Bx) exp. additivity (BI)  
 Int\_AB = 0 and Int\_BA = 0 at EC50

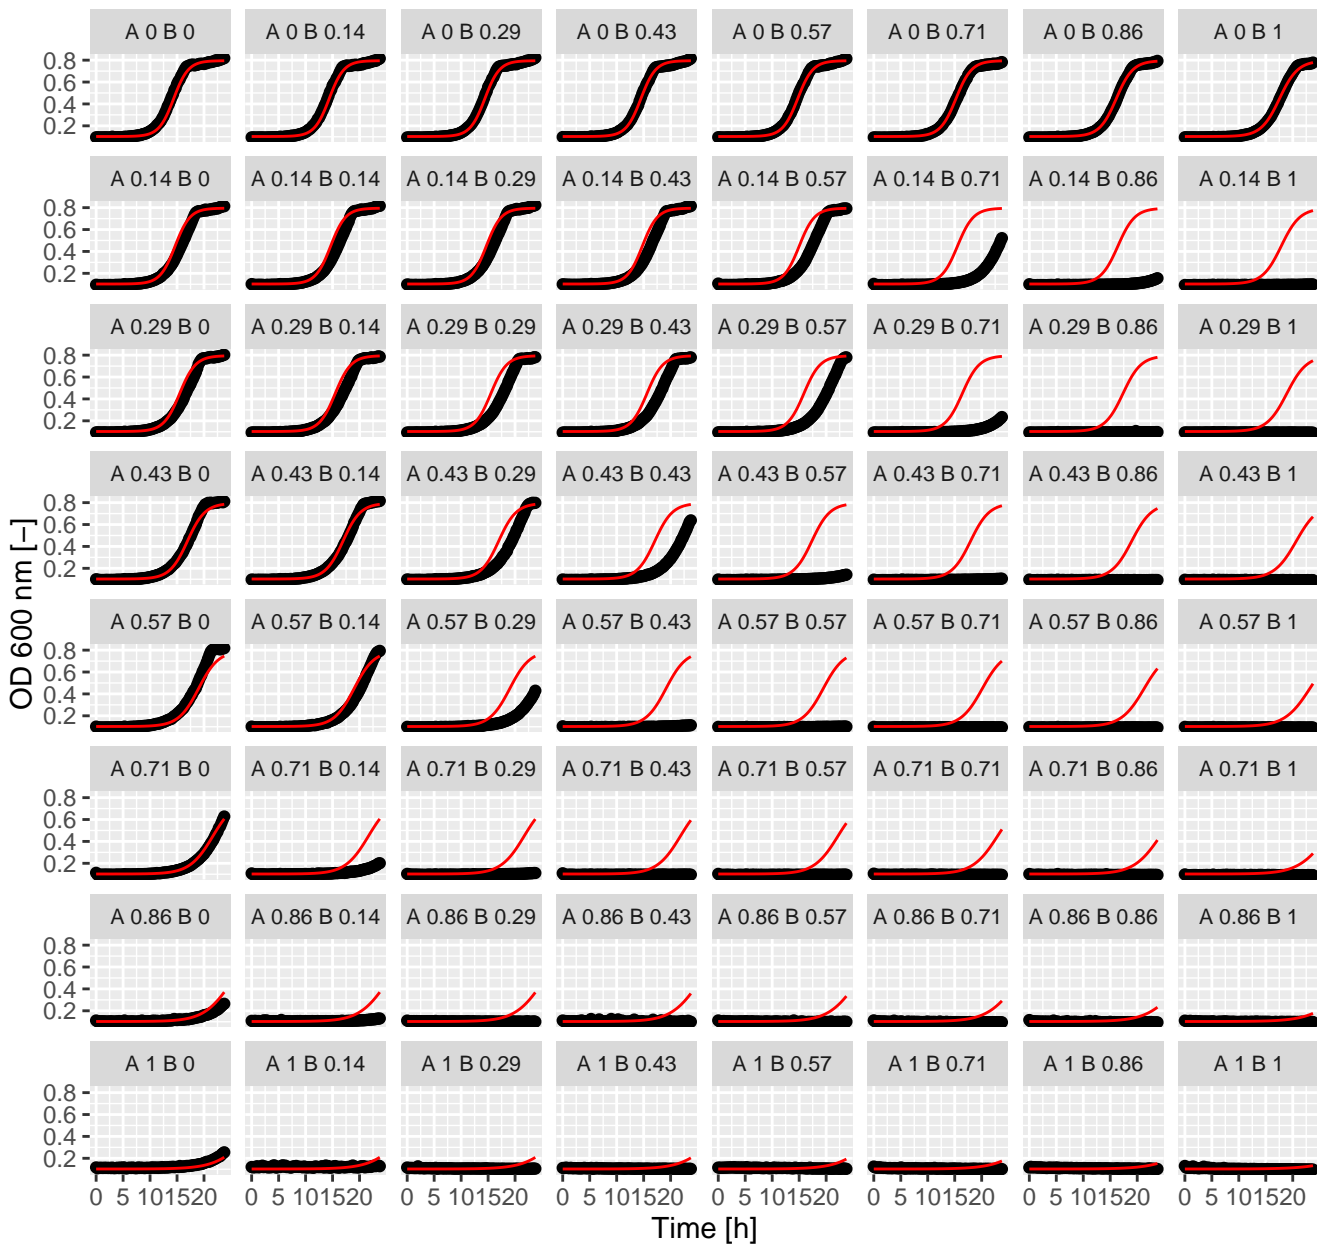

Tac.Tam (= Ax.Bx) full GPDI  
Int\_AB = -0.53 and Int\_BA = -0.42 at EC50

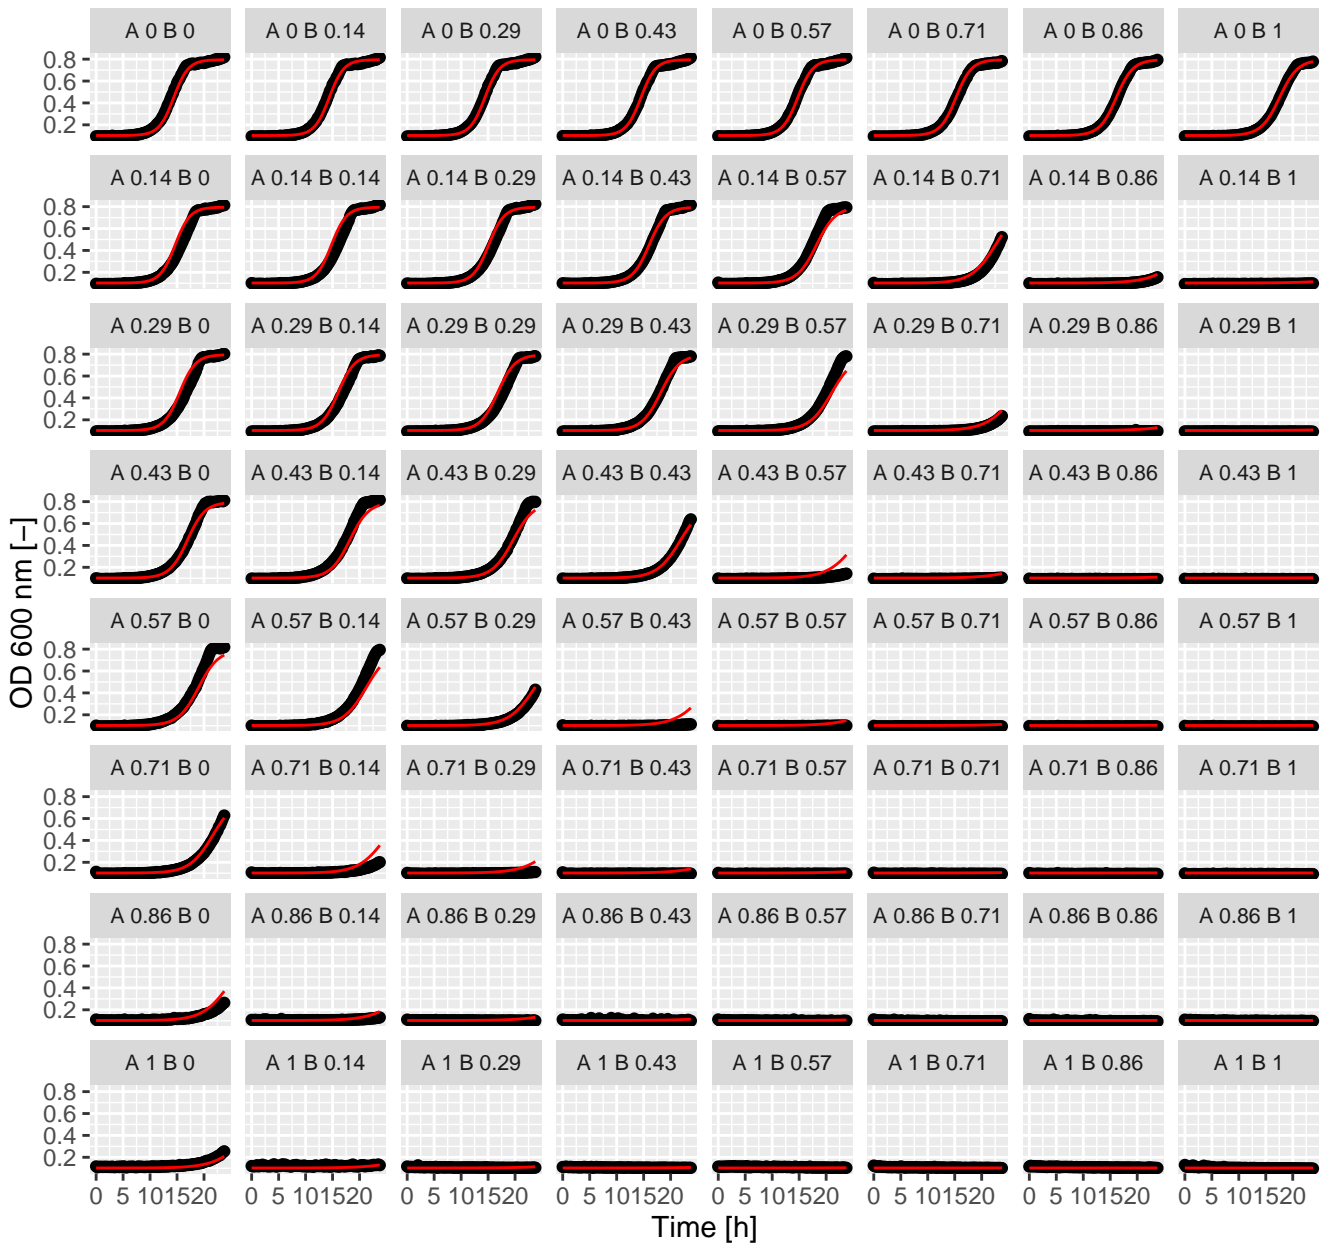

Tac.Tac (= Ax.Bx) exp. additivity (BI)  
 Int\_AB = 0 and Int\_BA = 0 at EC50

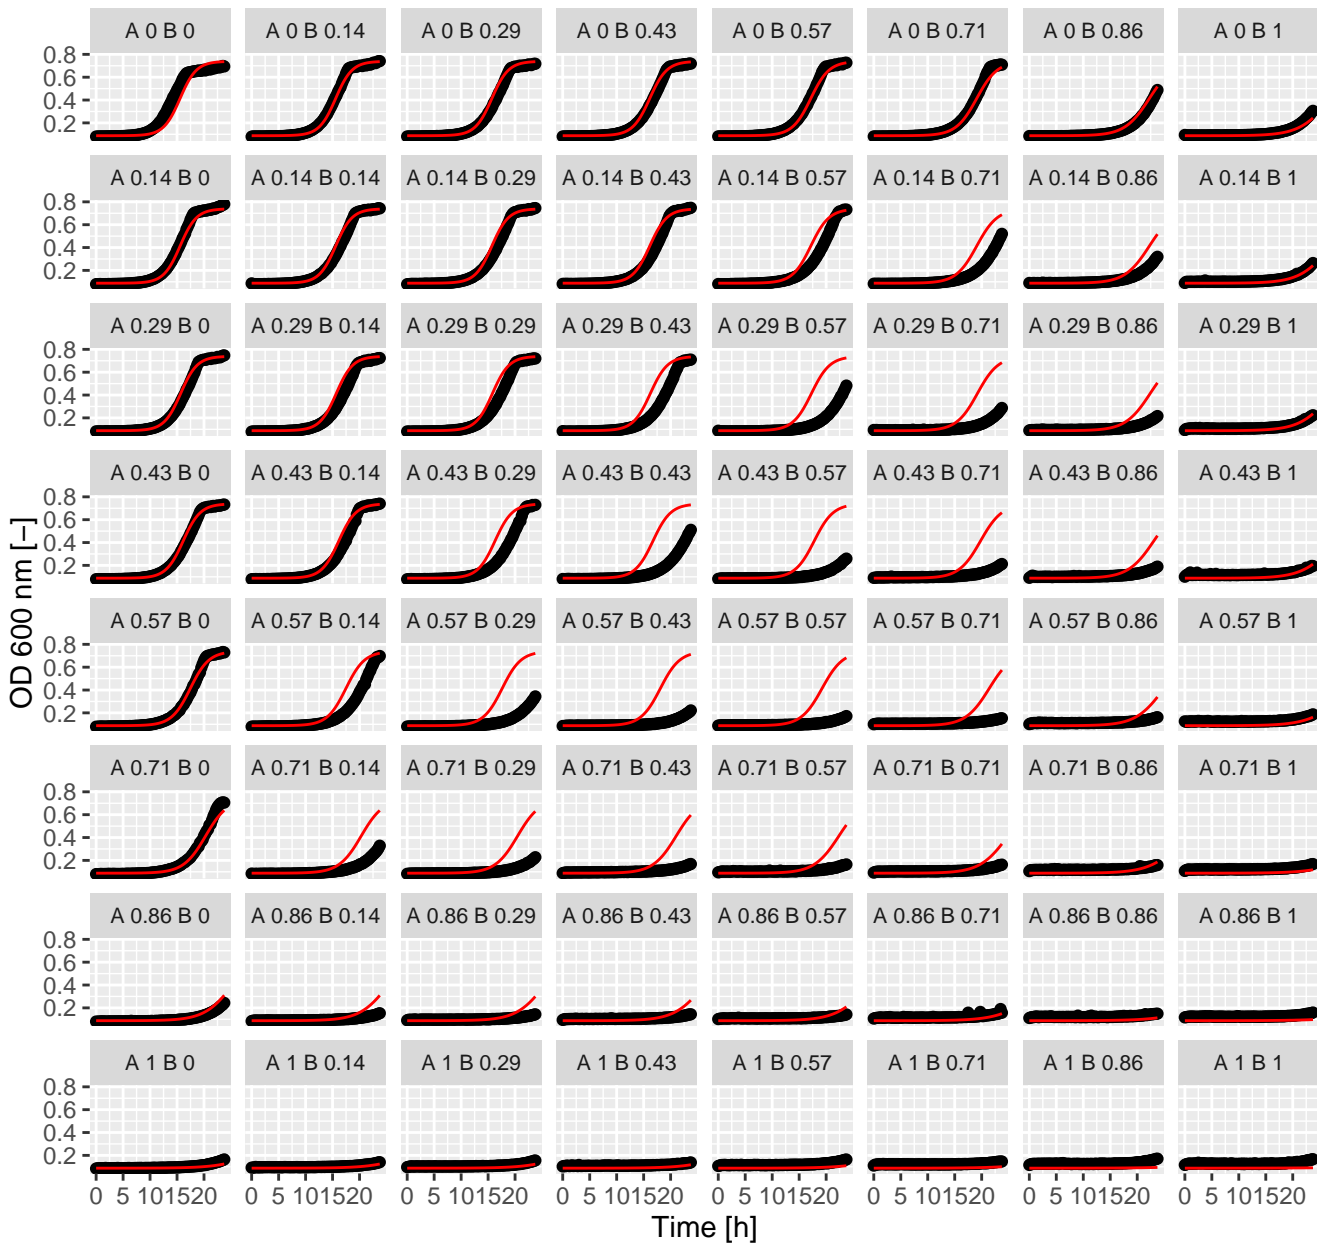

Tac.Tac (= Ax.Bx) full GPDI  
 Int\_AB = -0.44 and Int\_BA = -0.53 at EC50

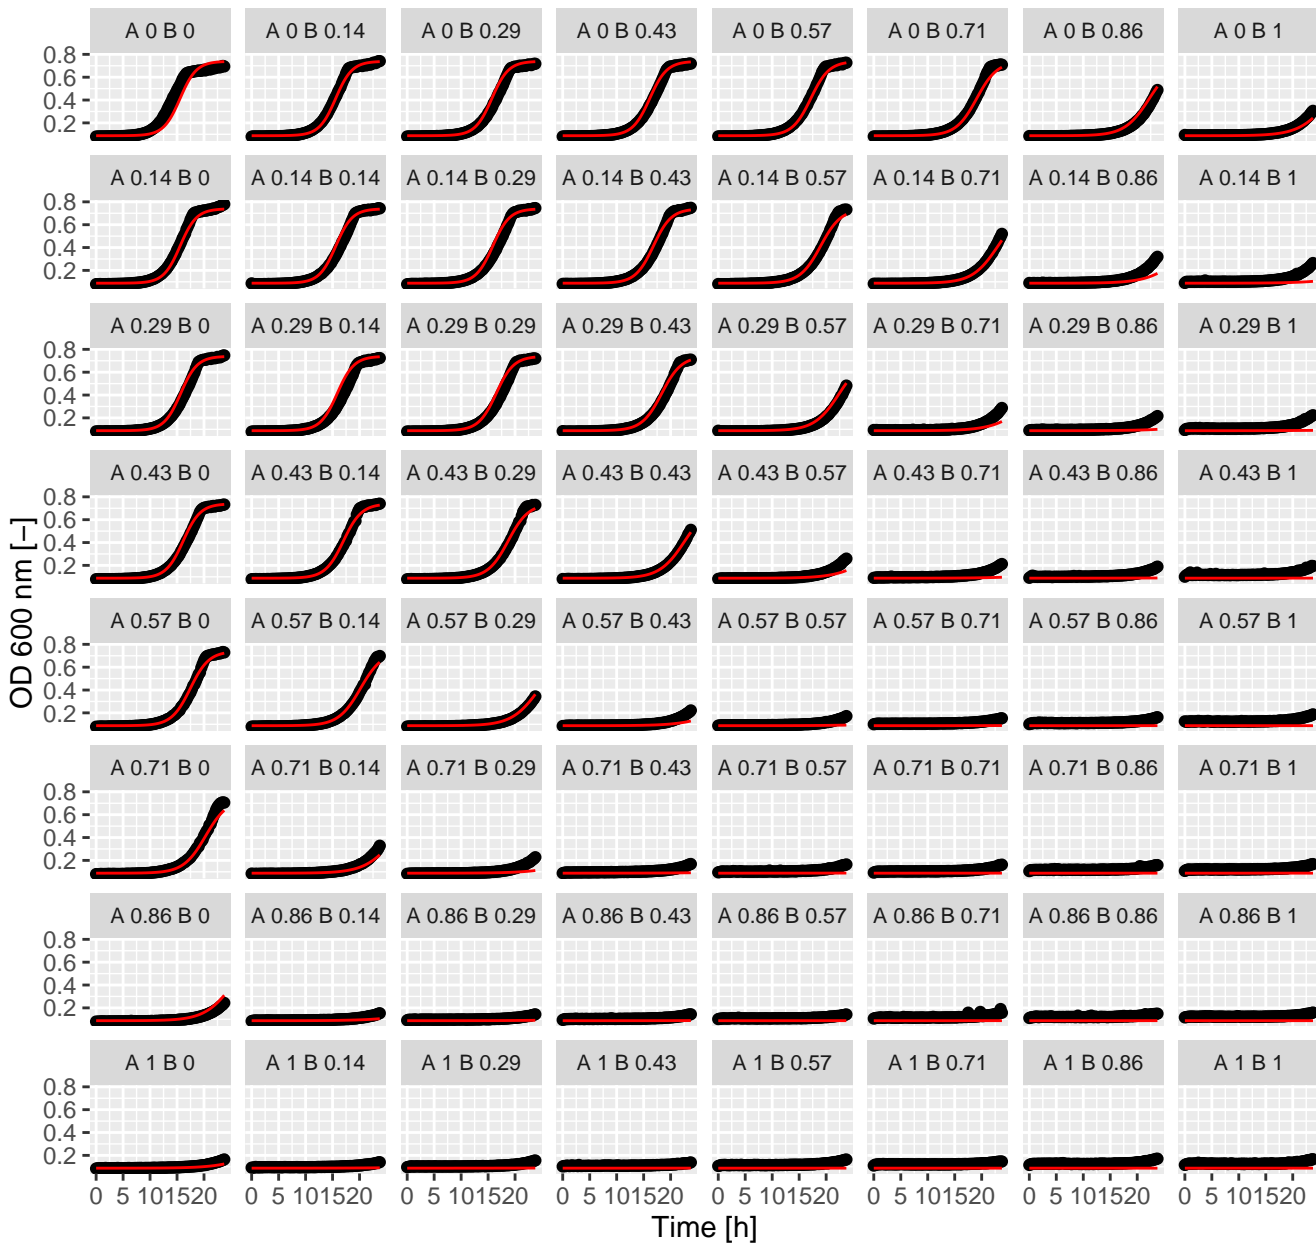

Sta.Wor (= Ax.Bx) exp. additivity (BI)  
Int\_AB = 0 and Int\_BA = 0 at EC50

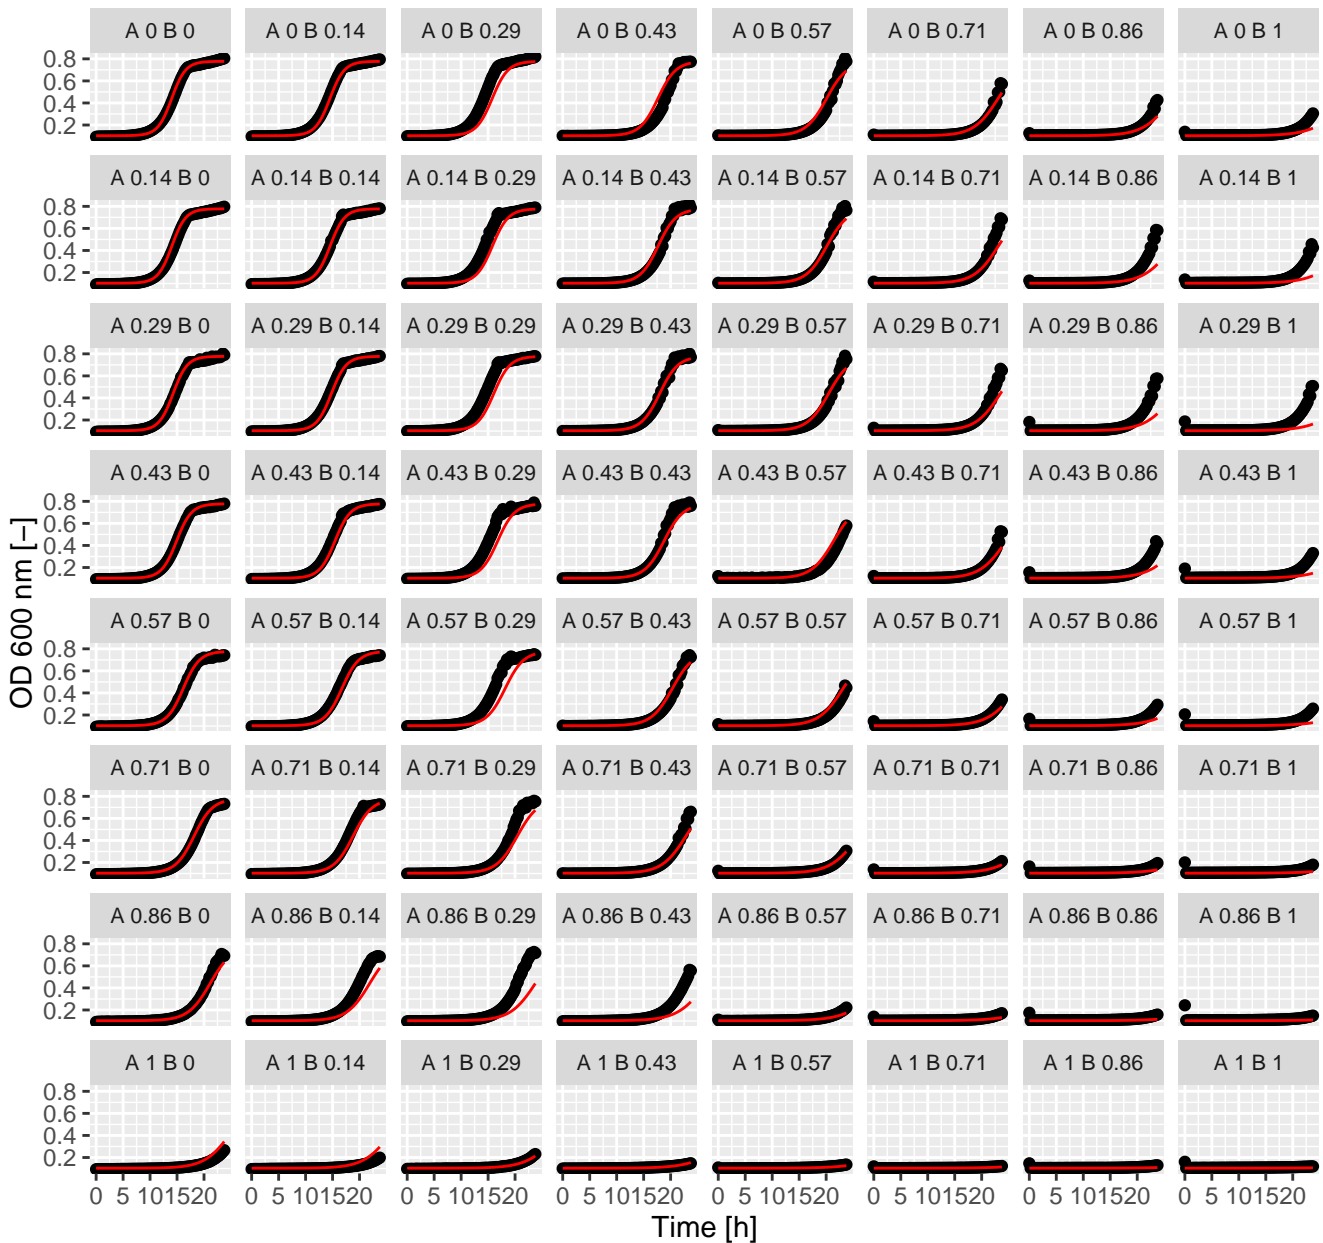

Sta.Wor (= Ax.Bx) full GPDI  
 Int\_AB = 0.08 and Int\_BA = 0.07 at EC50

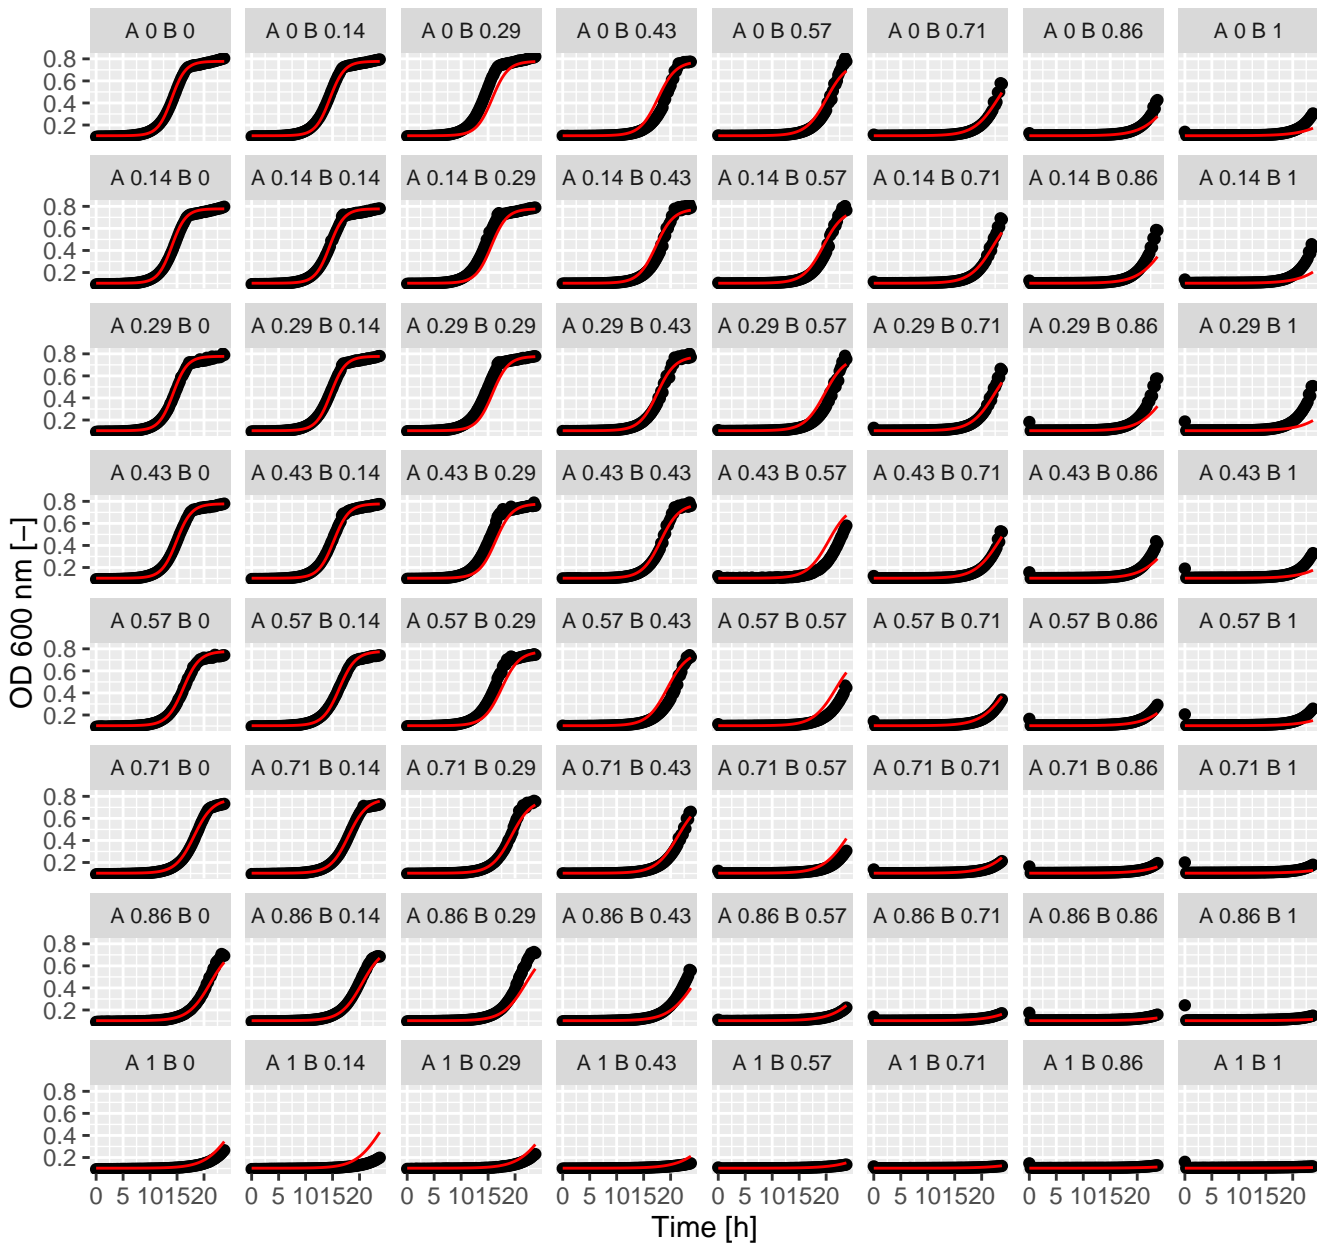

Sta.Tun (= Ax.Bx) exp. additivity (BI)  
Int\_AB = 0 and Int\_BA = 0 at EC50

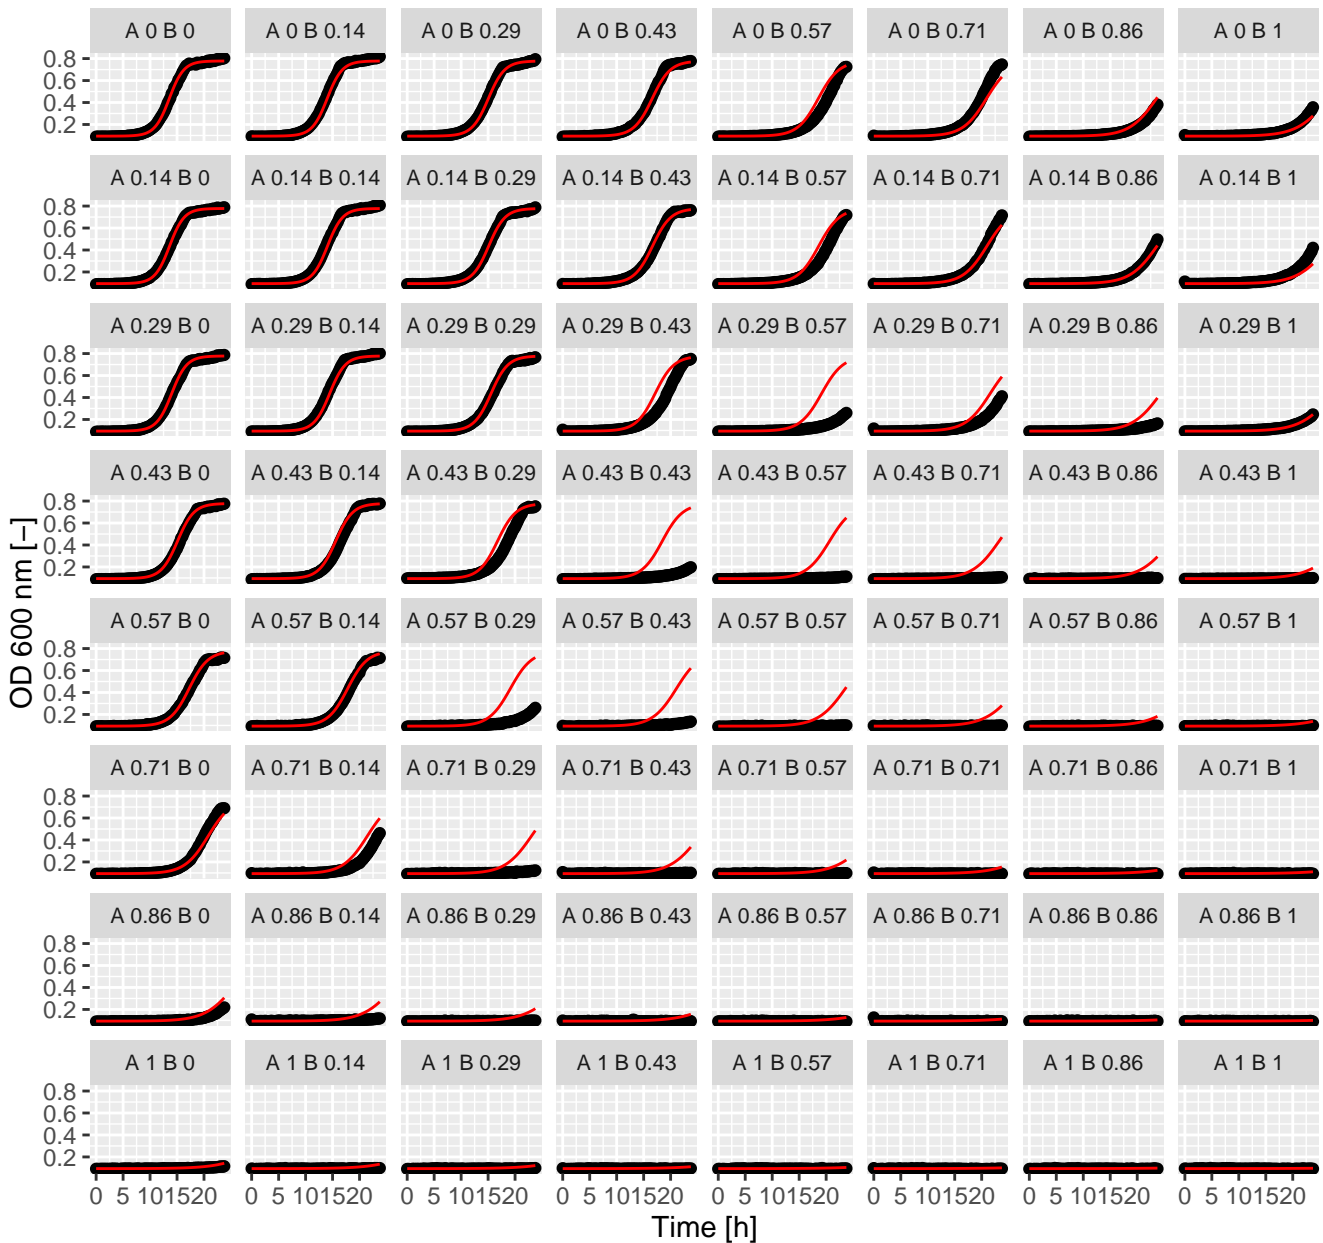

Sta.Tun (= Ax.Bx) full GPDI  
Int\_AB = -0.51 and Int\_BA = -0.25 at EC50

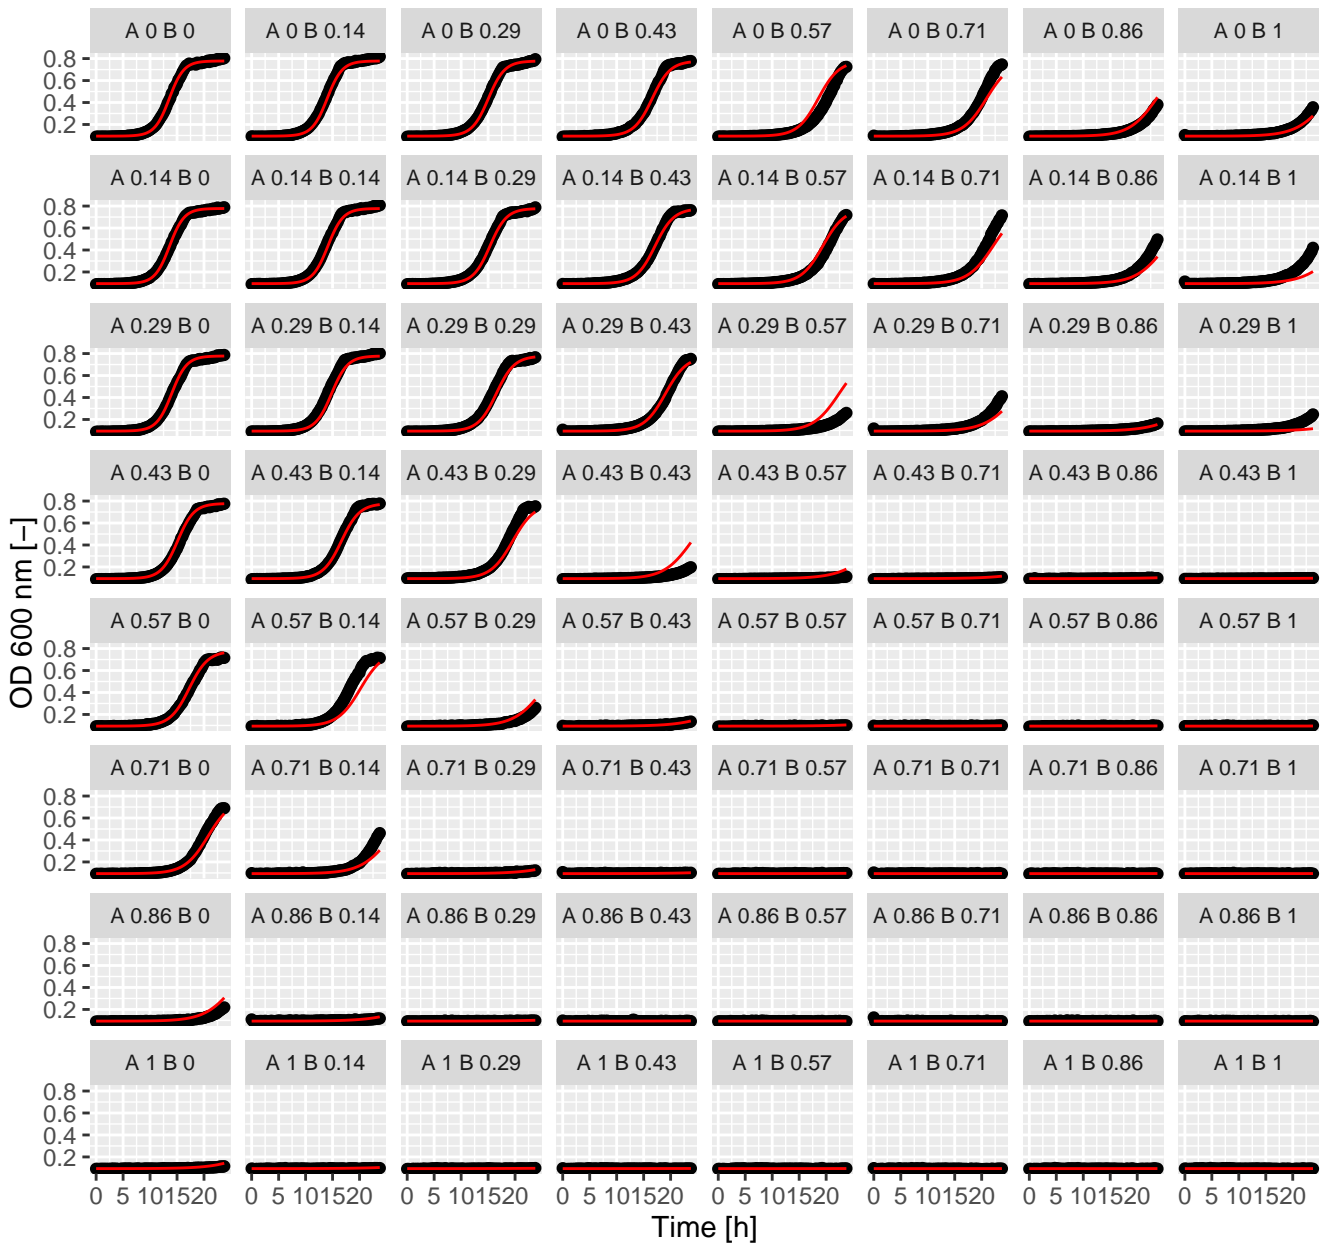



Sta.Ter (= Ax.Bx) exp. additivity (BI)  
Int\_AB = 0 and Int\_BA = 0 at EC50

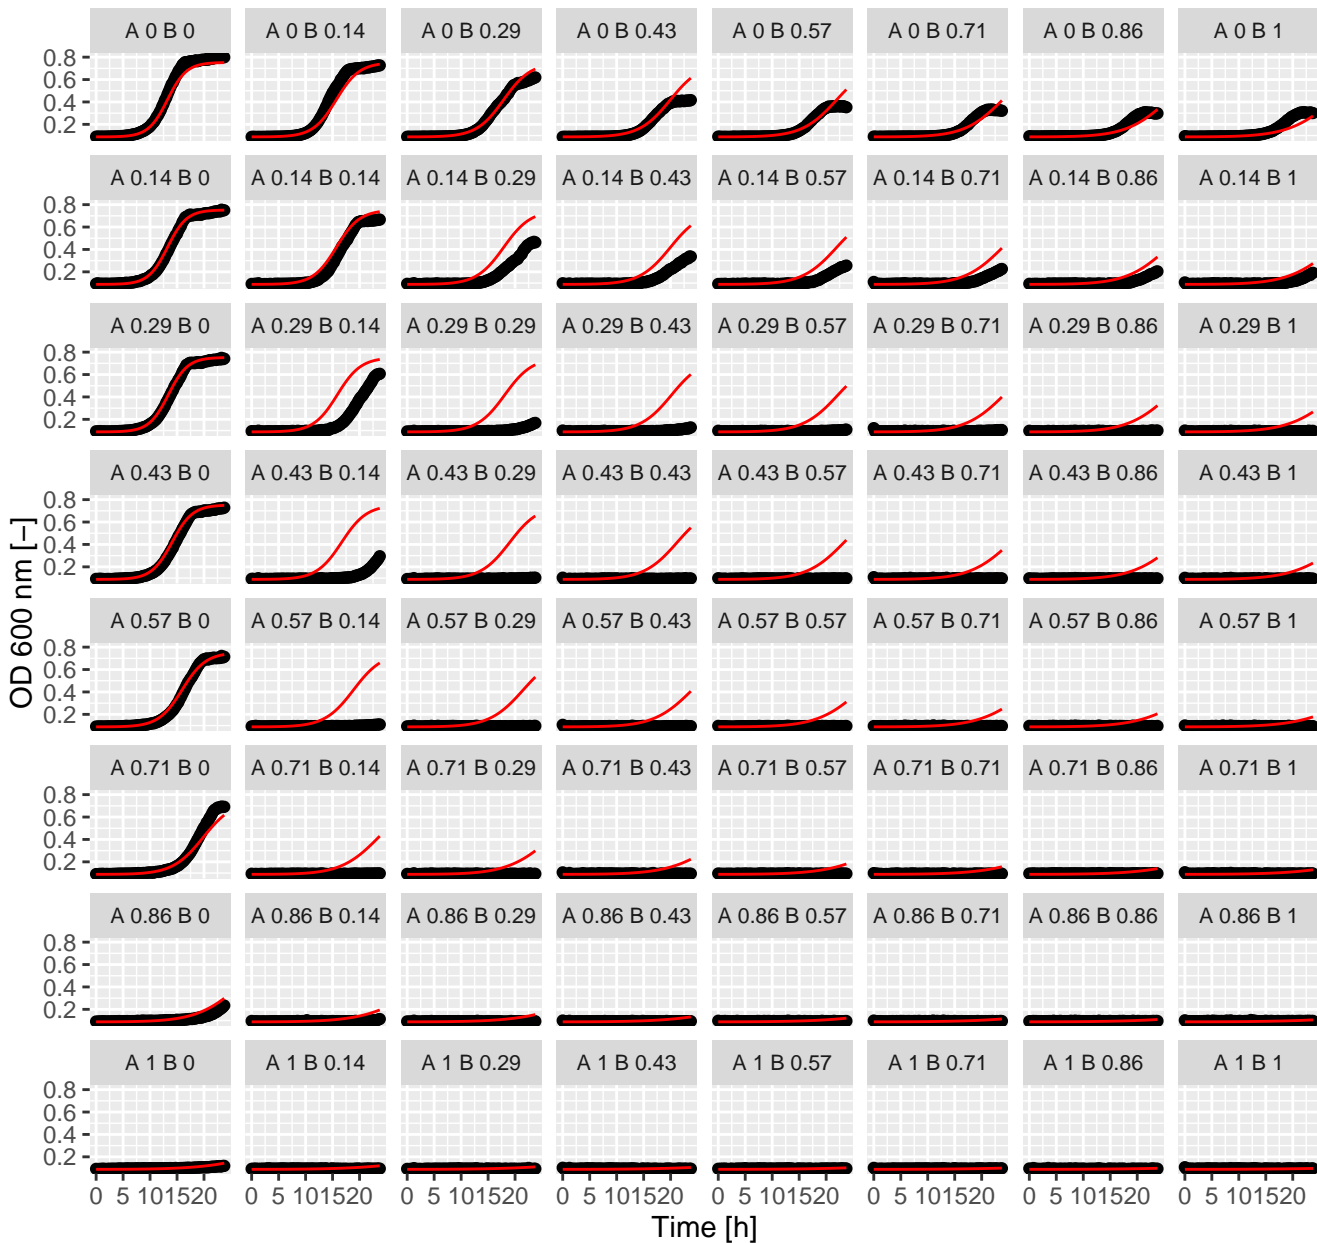

Sta.Ter (= Ax.Bx) full GPD1  
Int\_AB = -0.68 and Int\_BA = -0.7 at EC50

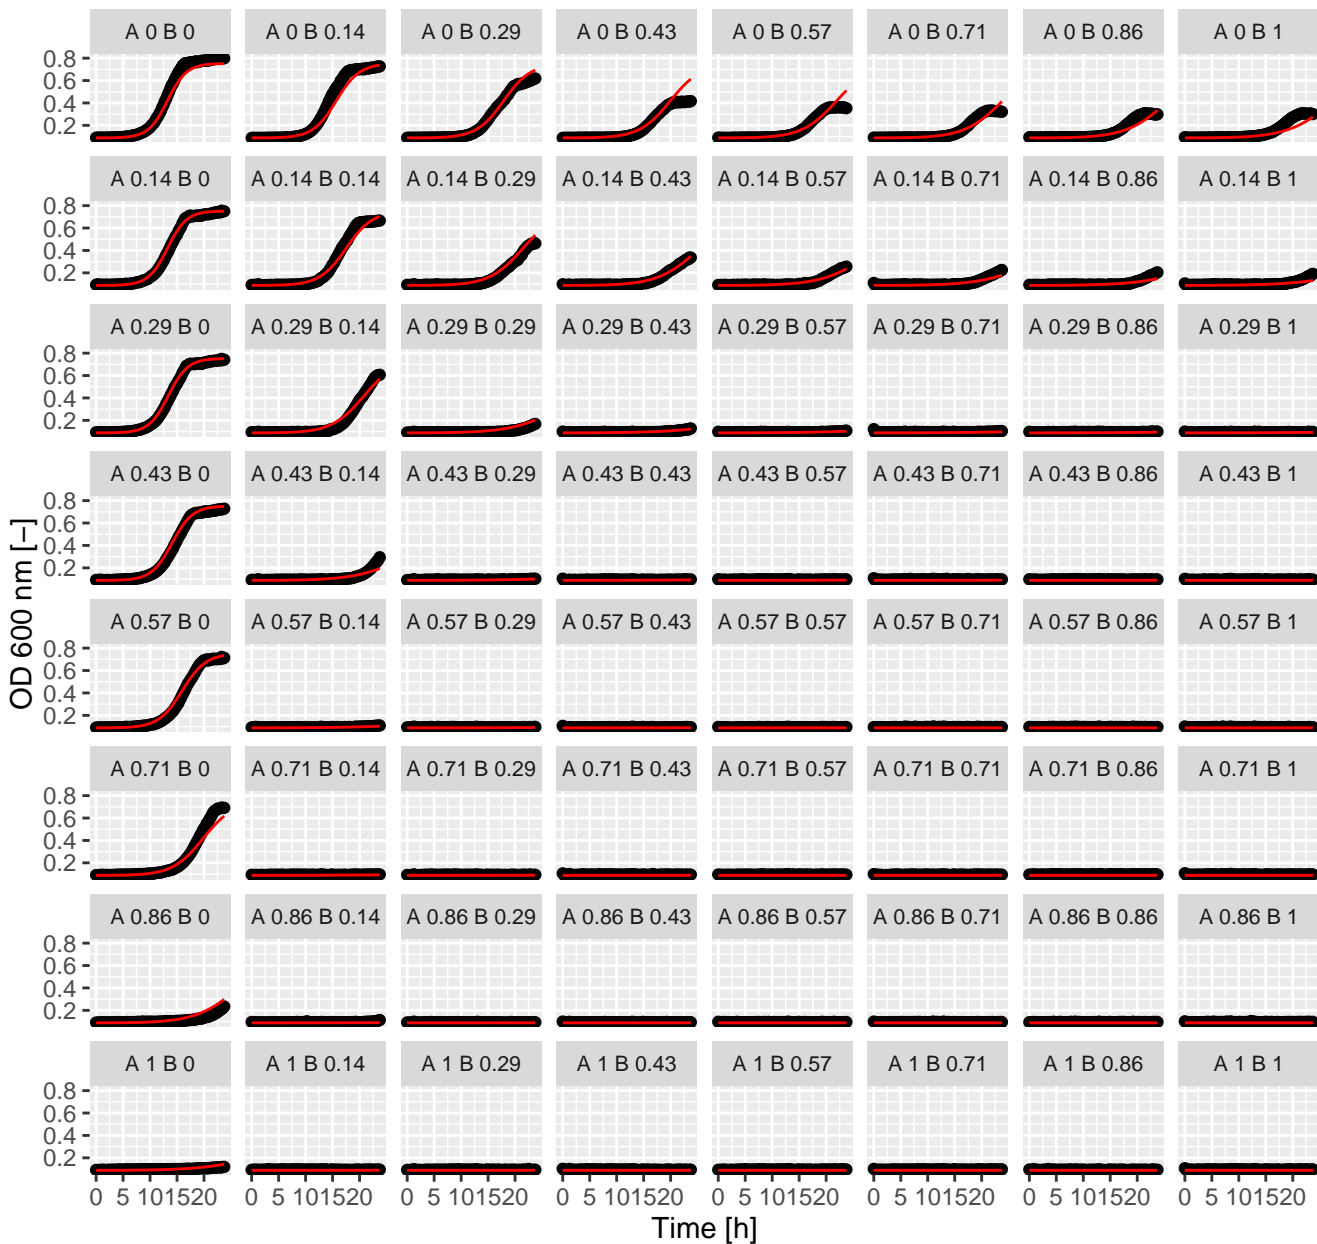

Sta.Tam (= Ax.Bx) exp. additivity (BI)  
 Int\_AB = 0 and Int\_BA = 0 at EC50

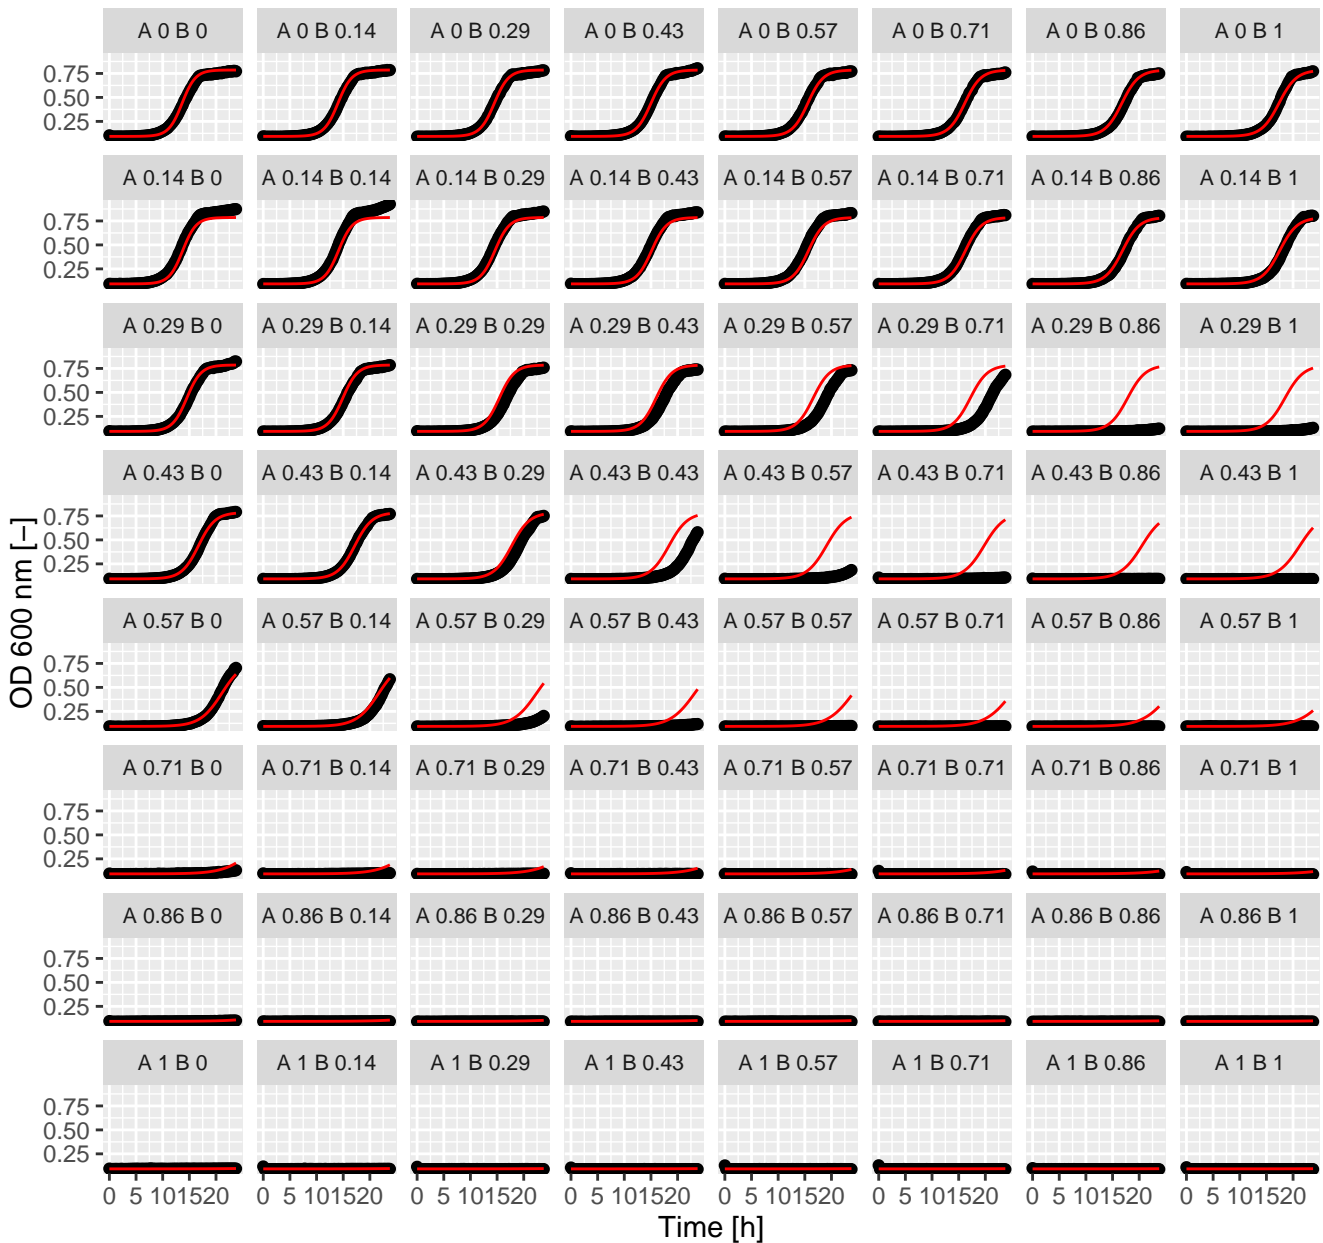

Sta.Tam (= Ax.Bx) full GPDI  
 Int\_AB = -0.74 and Int\_BA = 0.87 at EC50

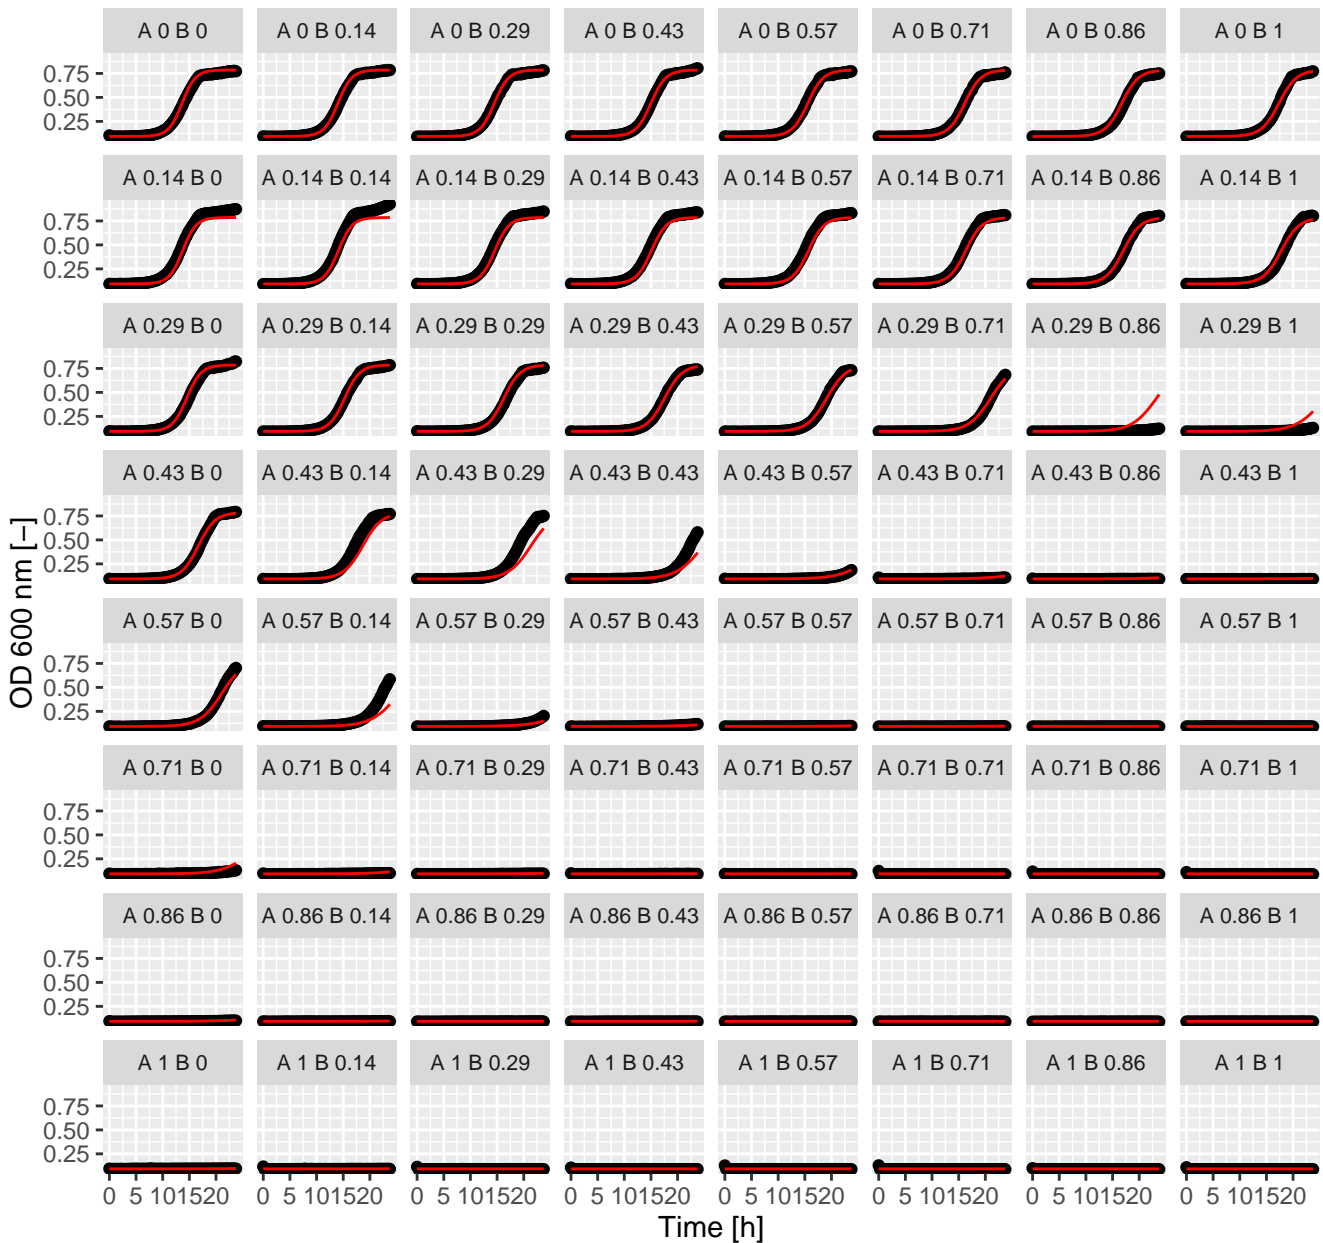

Sta.Tac (= Ax.Bx) exp. additivity (BI)  
 Int\_AB = 0 and Int\_BA = 0 at EC50

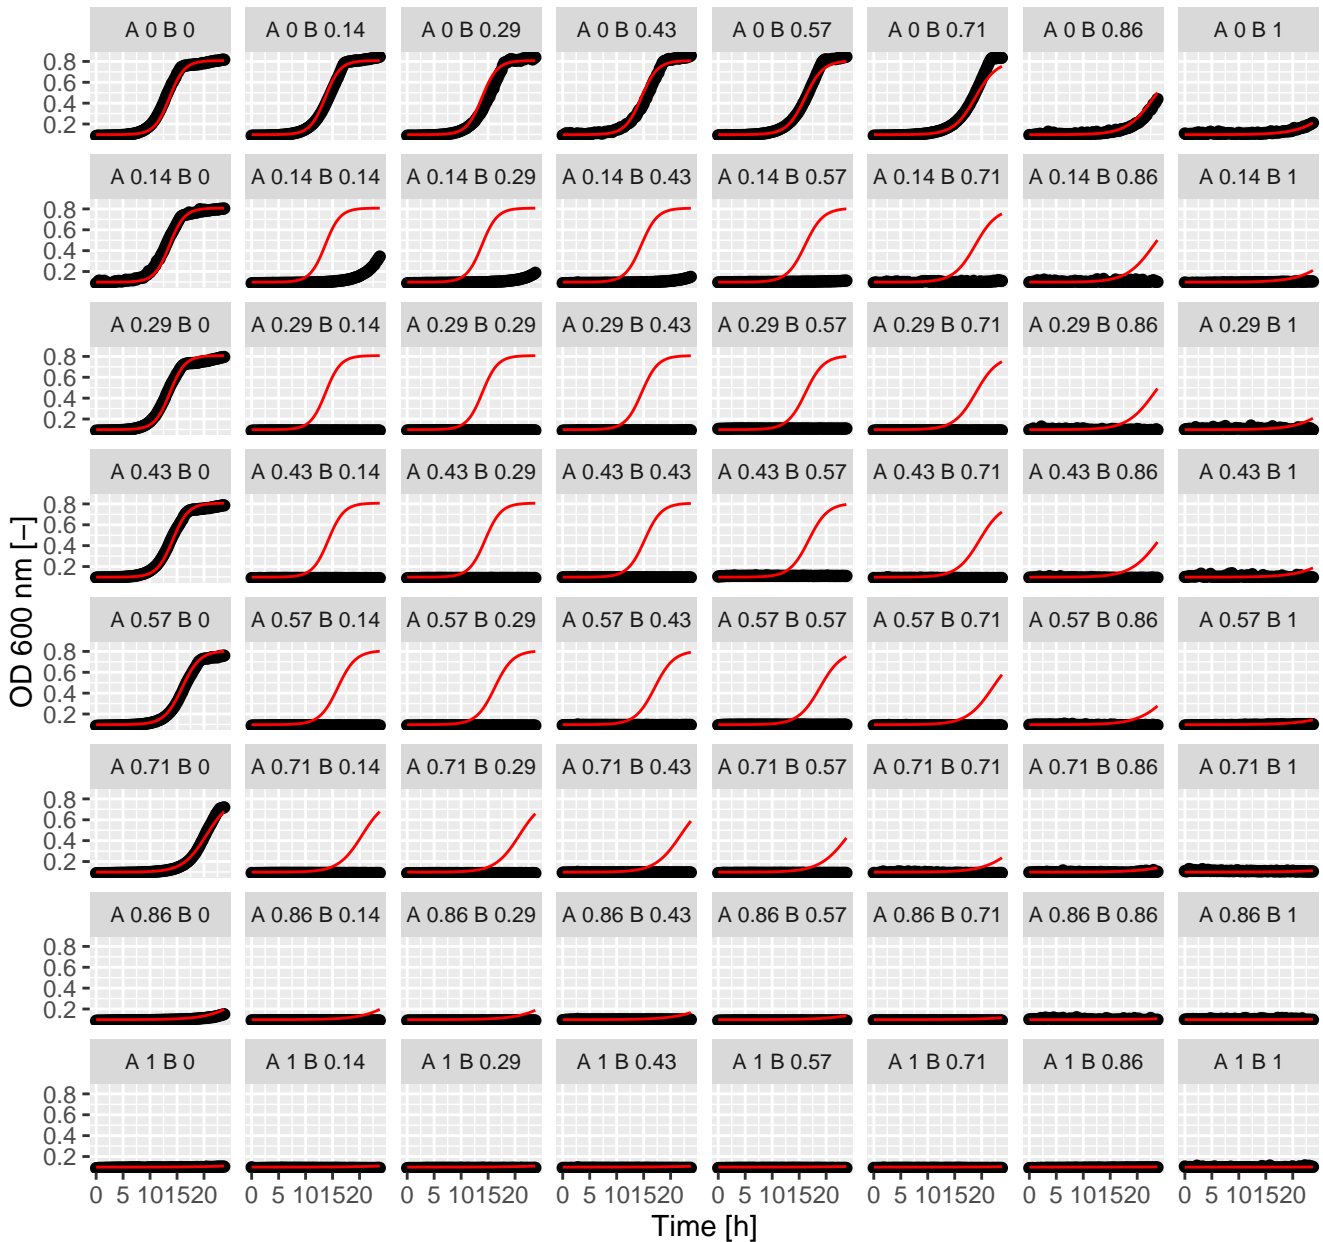

Sta.Tac (= Ax.Bx) full GPDI  
Int\_AB = -0.84 and Int\_BA = 0.28 at EC50

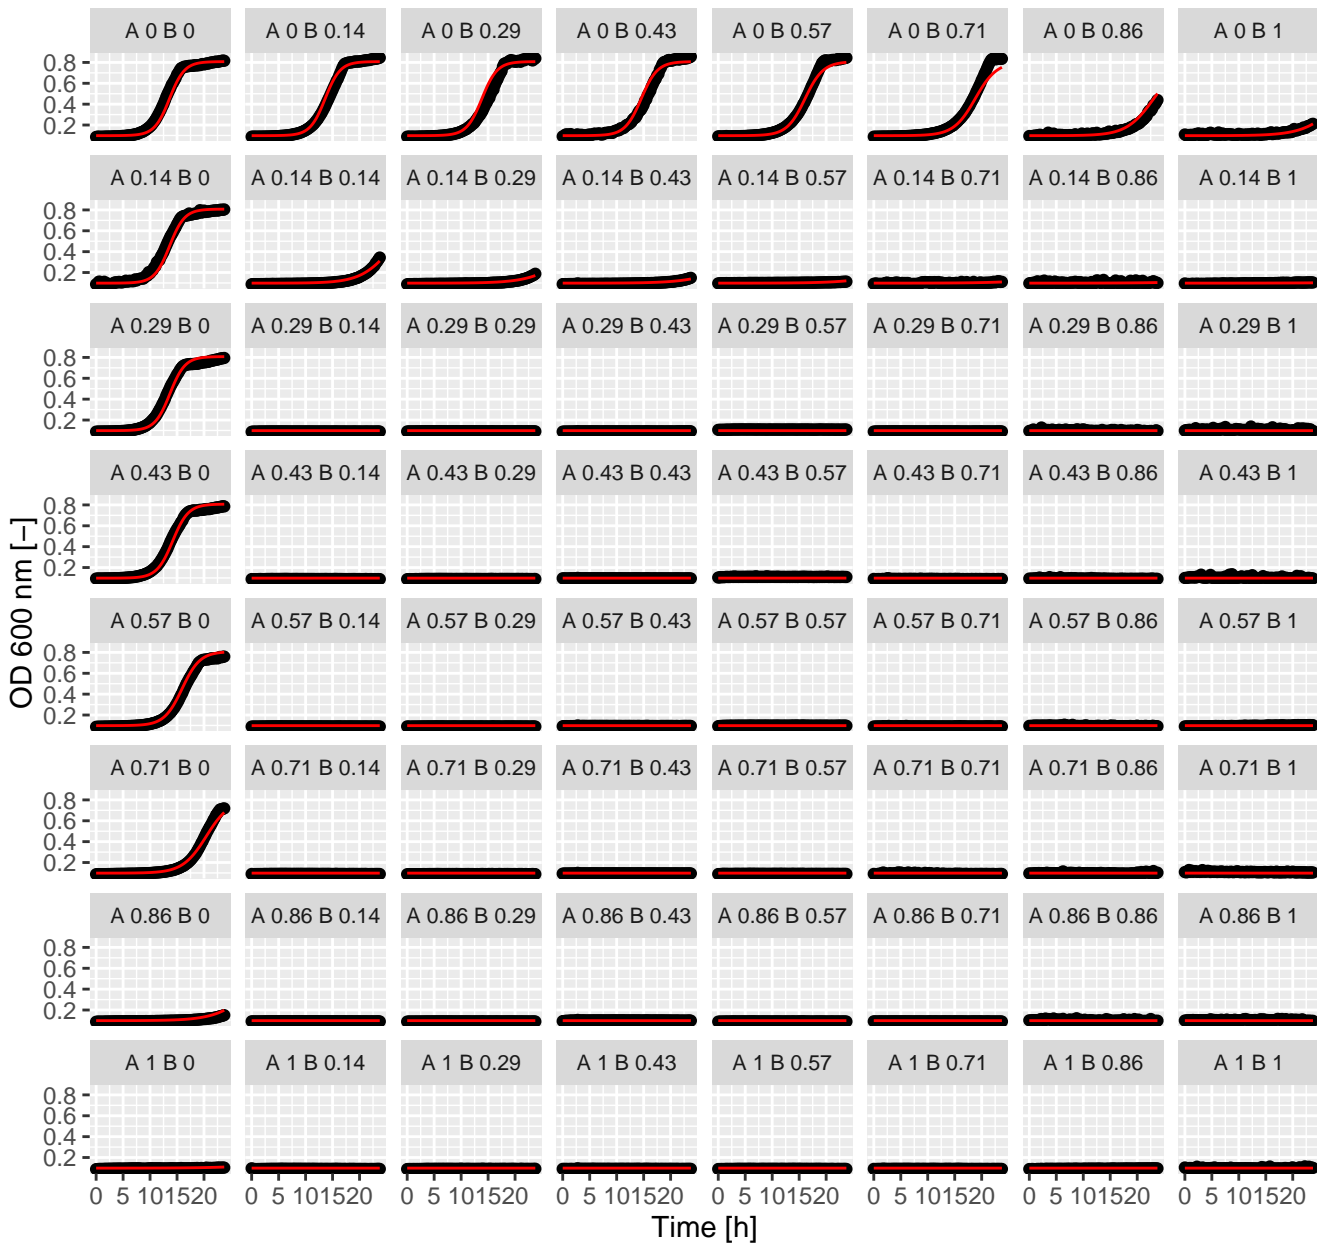

Sta.Sta (= Ax.Bx) exp. additivity (BI)  
 Int\_AB = 0 and Int\_BA = 0 at EC50

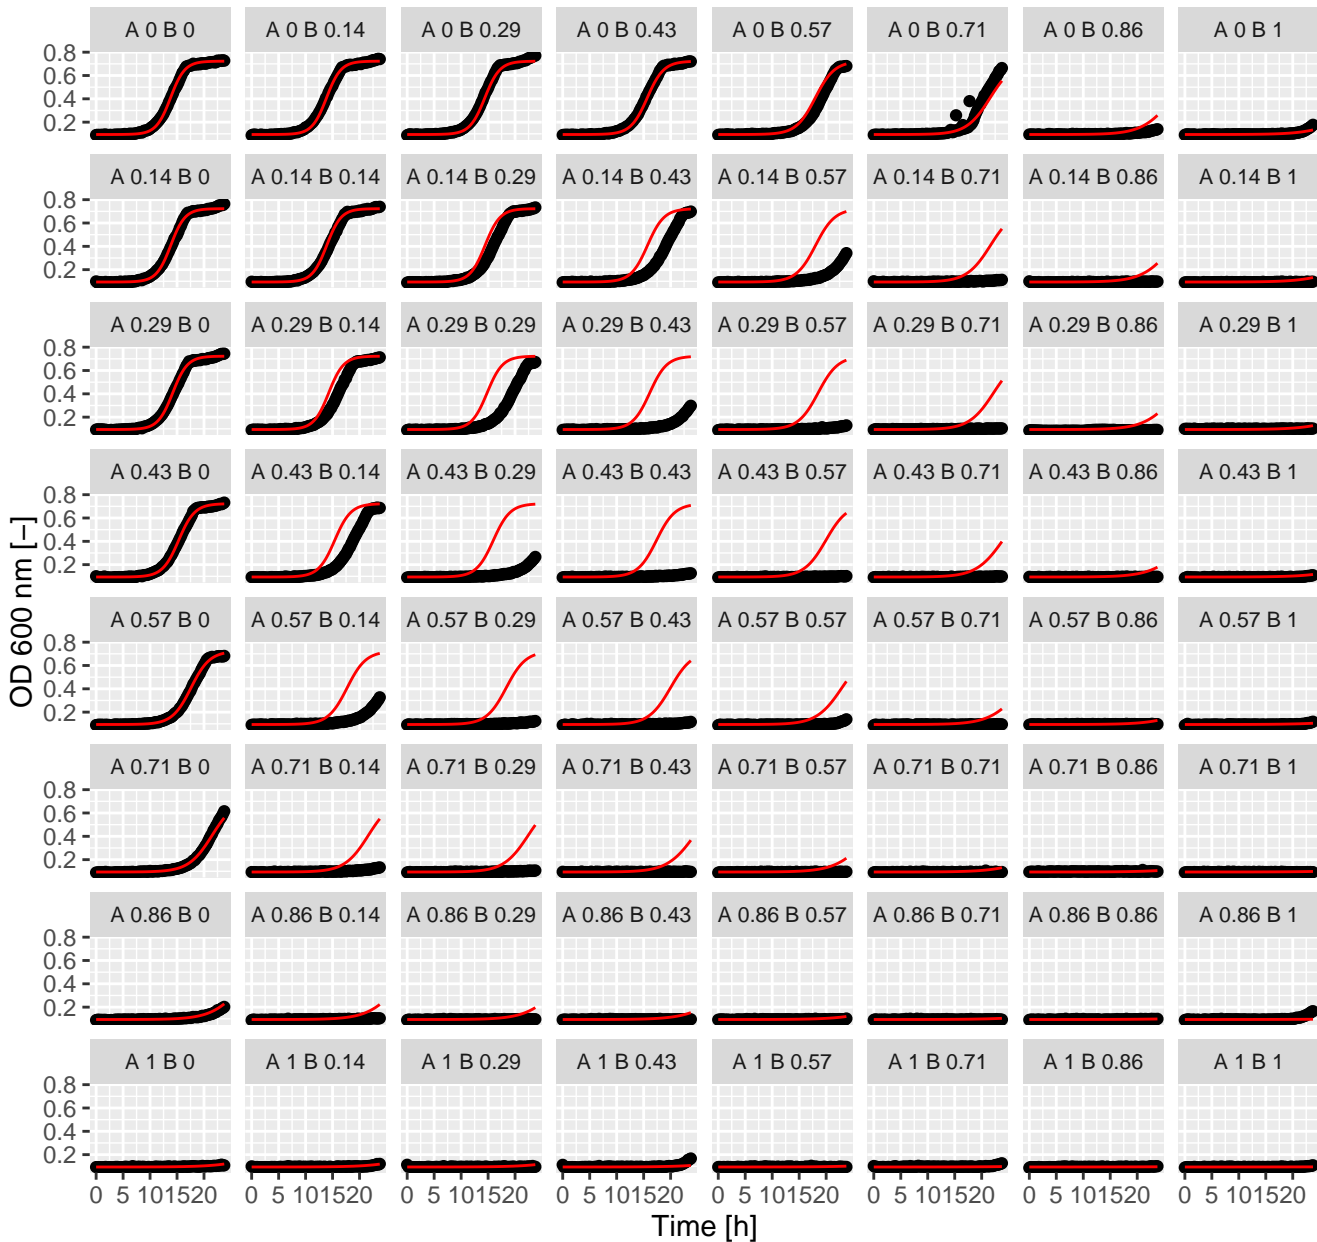

Sta.Sta (= Ax.Bx) full GPDI  
 Int\_AB = -0.51 and Int\_BA = -0.6 at EC50

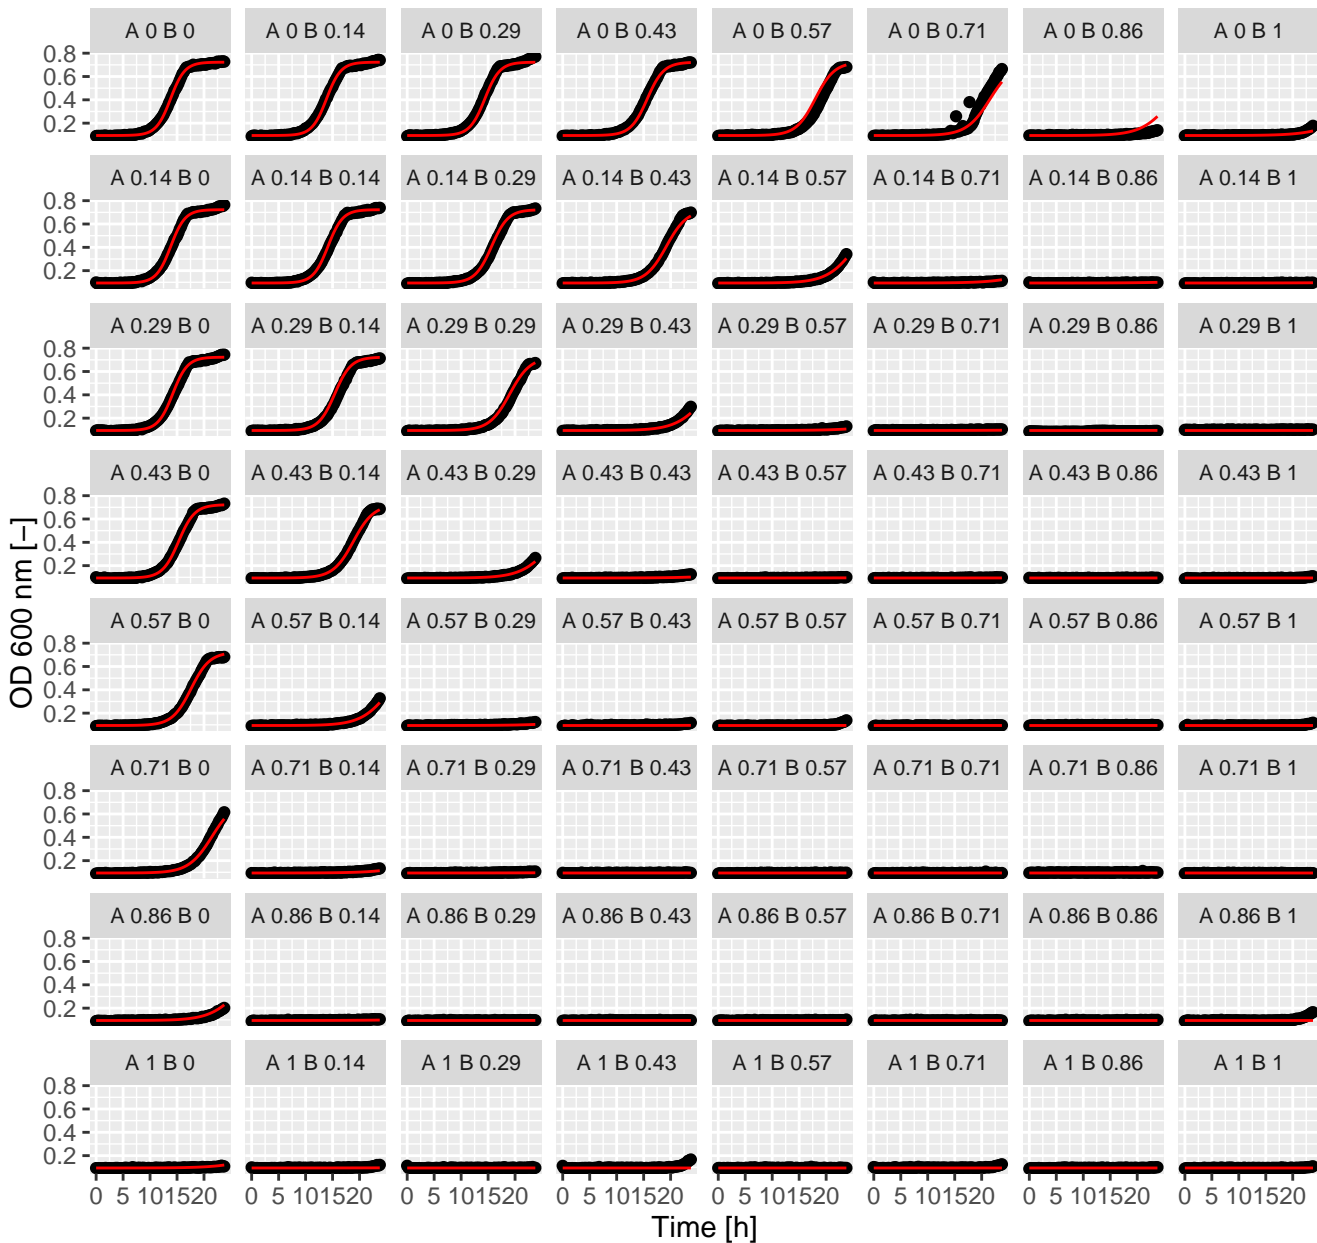



Rap.Tun (= Ax.Bx) exp. additivity (BI)  
Int\_AB = 0 and Int\_BA = 0 at EC50

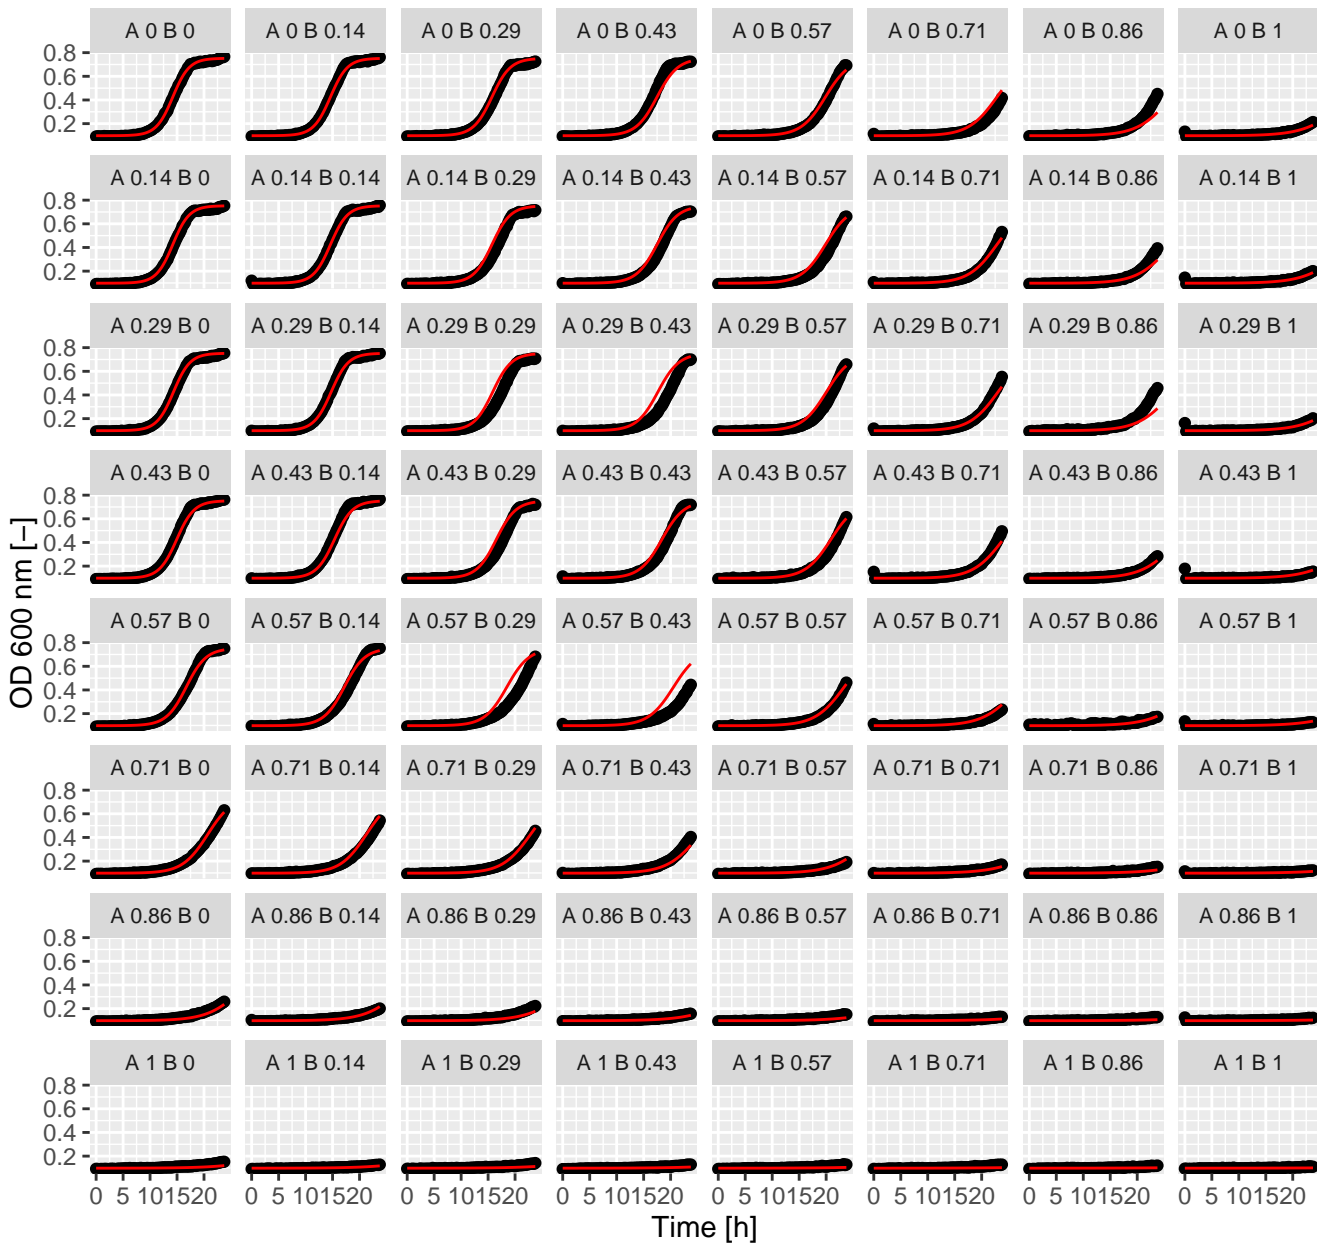

Rap.Tun (= Ax.Bx) full GPDI  
Int\_AB = -0.05 and Int\_BA = -0.05 at EC50

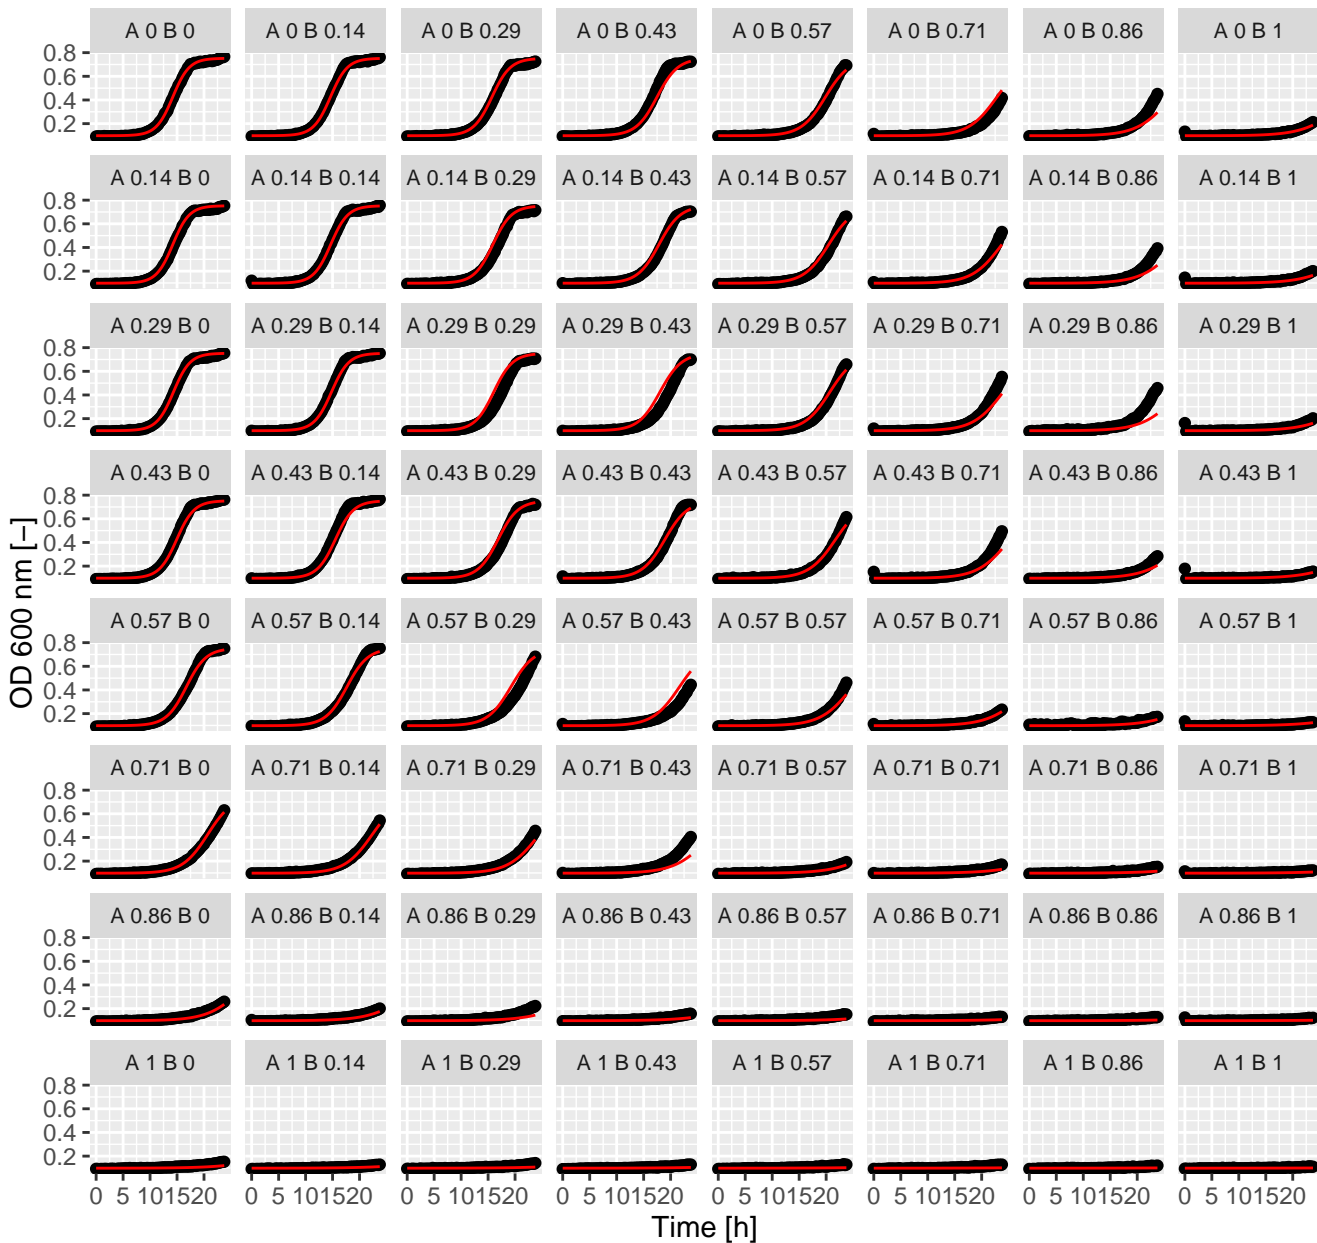

Rap.Ter (= Ax.Bx) exp. additivity (BI)  
 Int\_AB = 0 and Int\_BA = 0 at EC50

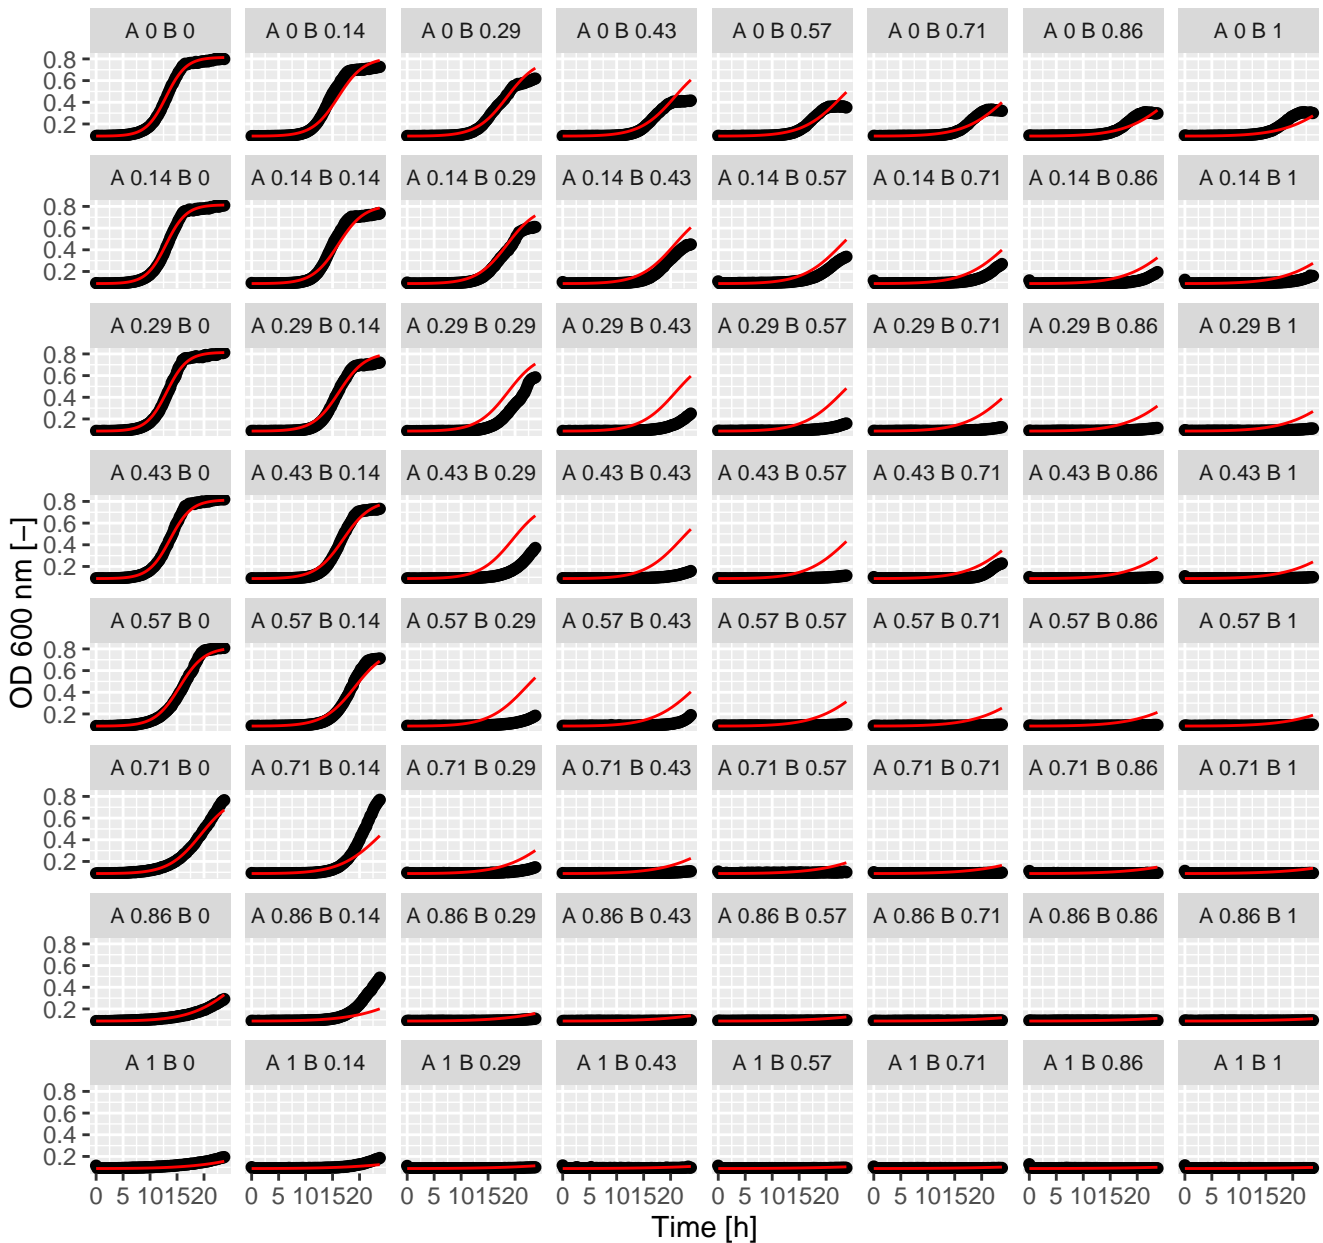

Rap.Ter (= Ax.Bx) full GPDI  
 Int\_AB = 1.47 and Int\_BA = -0.72 at EC50

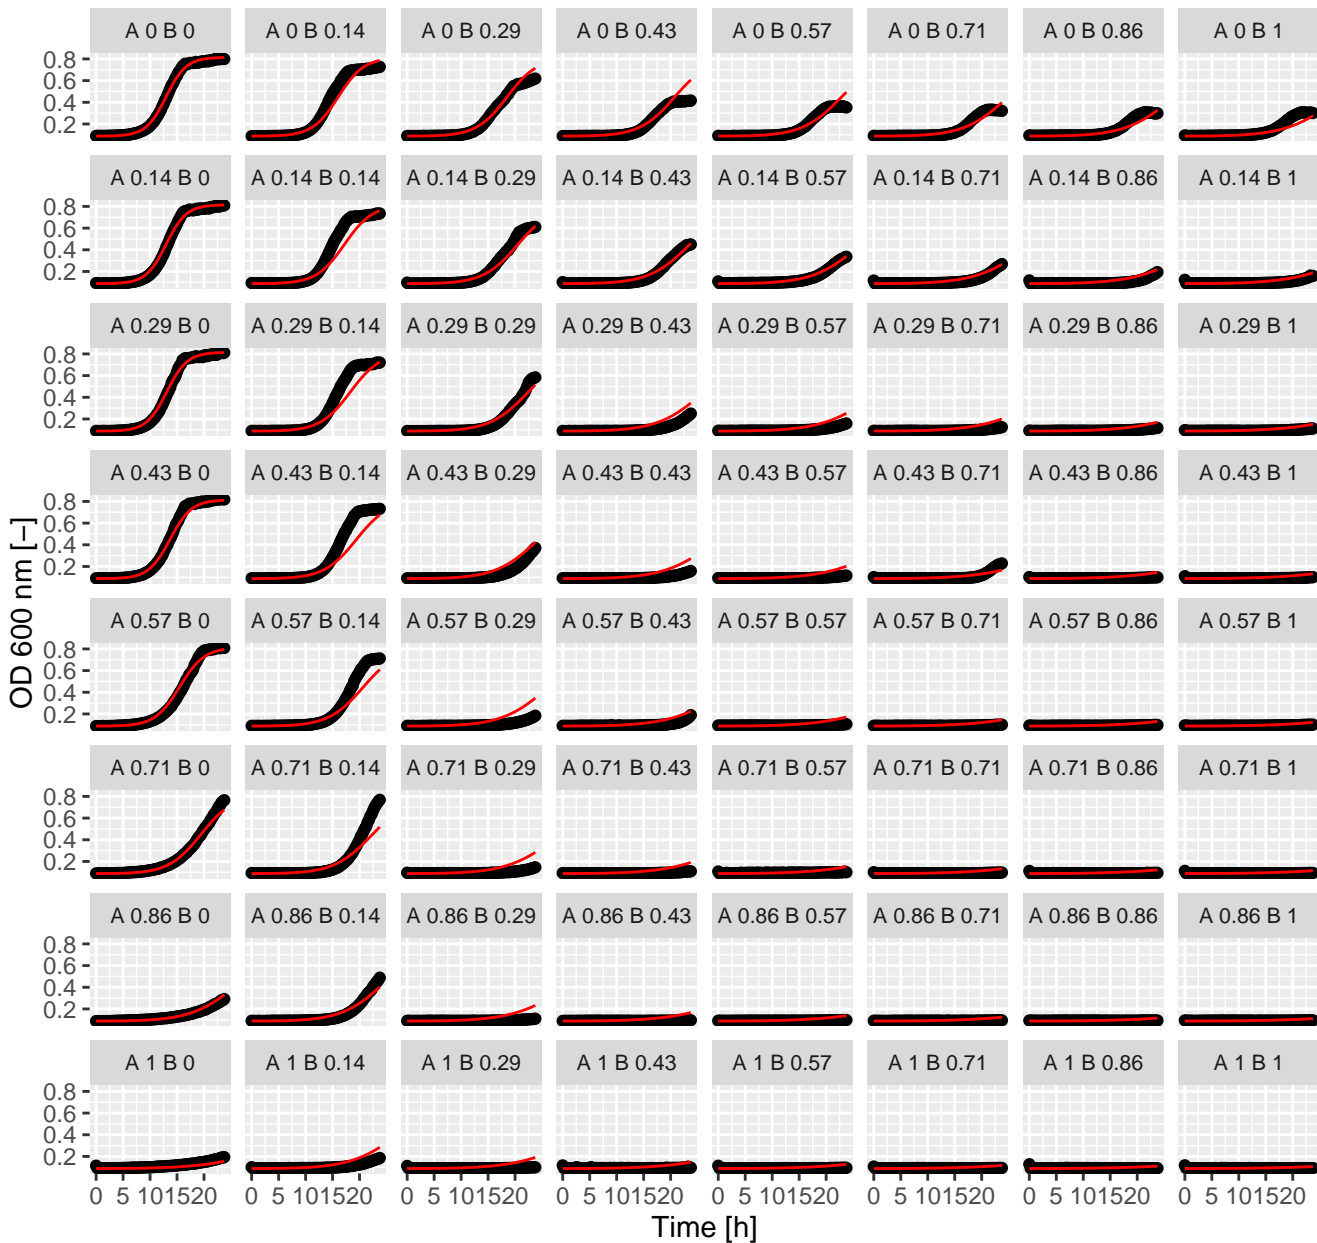

Rap.Tac (= Ax.Bx) exp. additivity (BI)  
 Int\_AB = 0 and Int\_BA = 0 at EC50

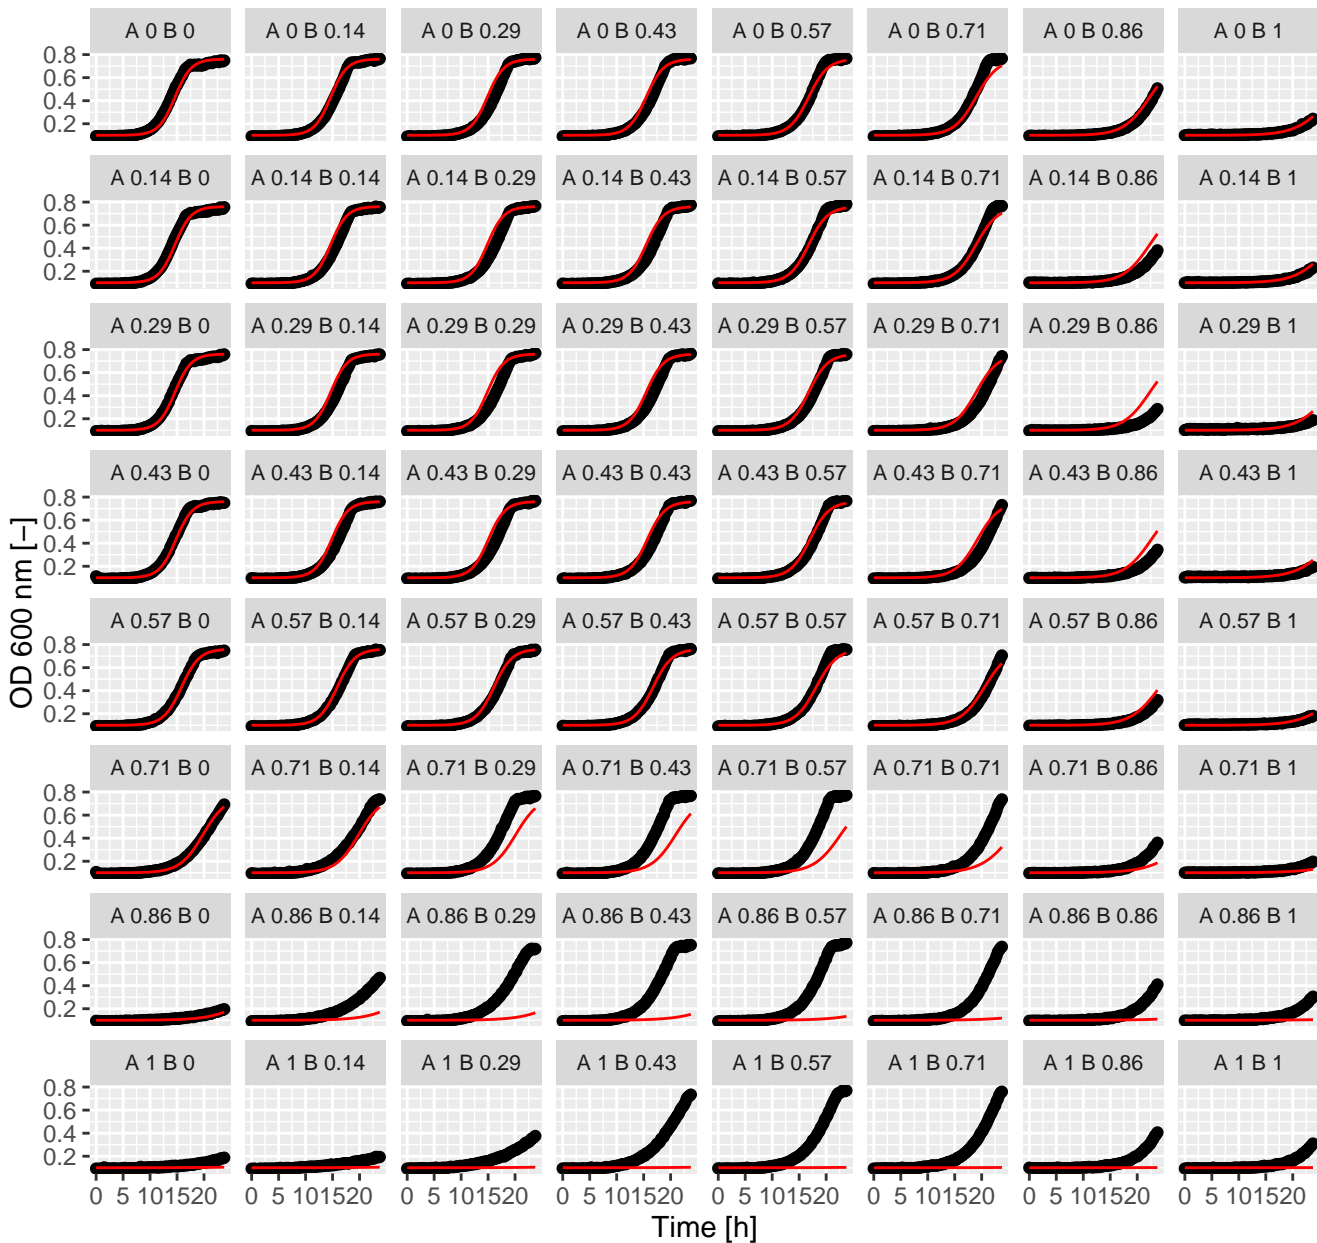

Rap.Tac (= Ax.Bx) full GPDI  
 Int\_AB = 1.05 and Int\_BA = -0.07 at EC50

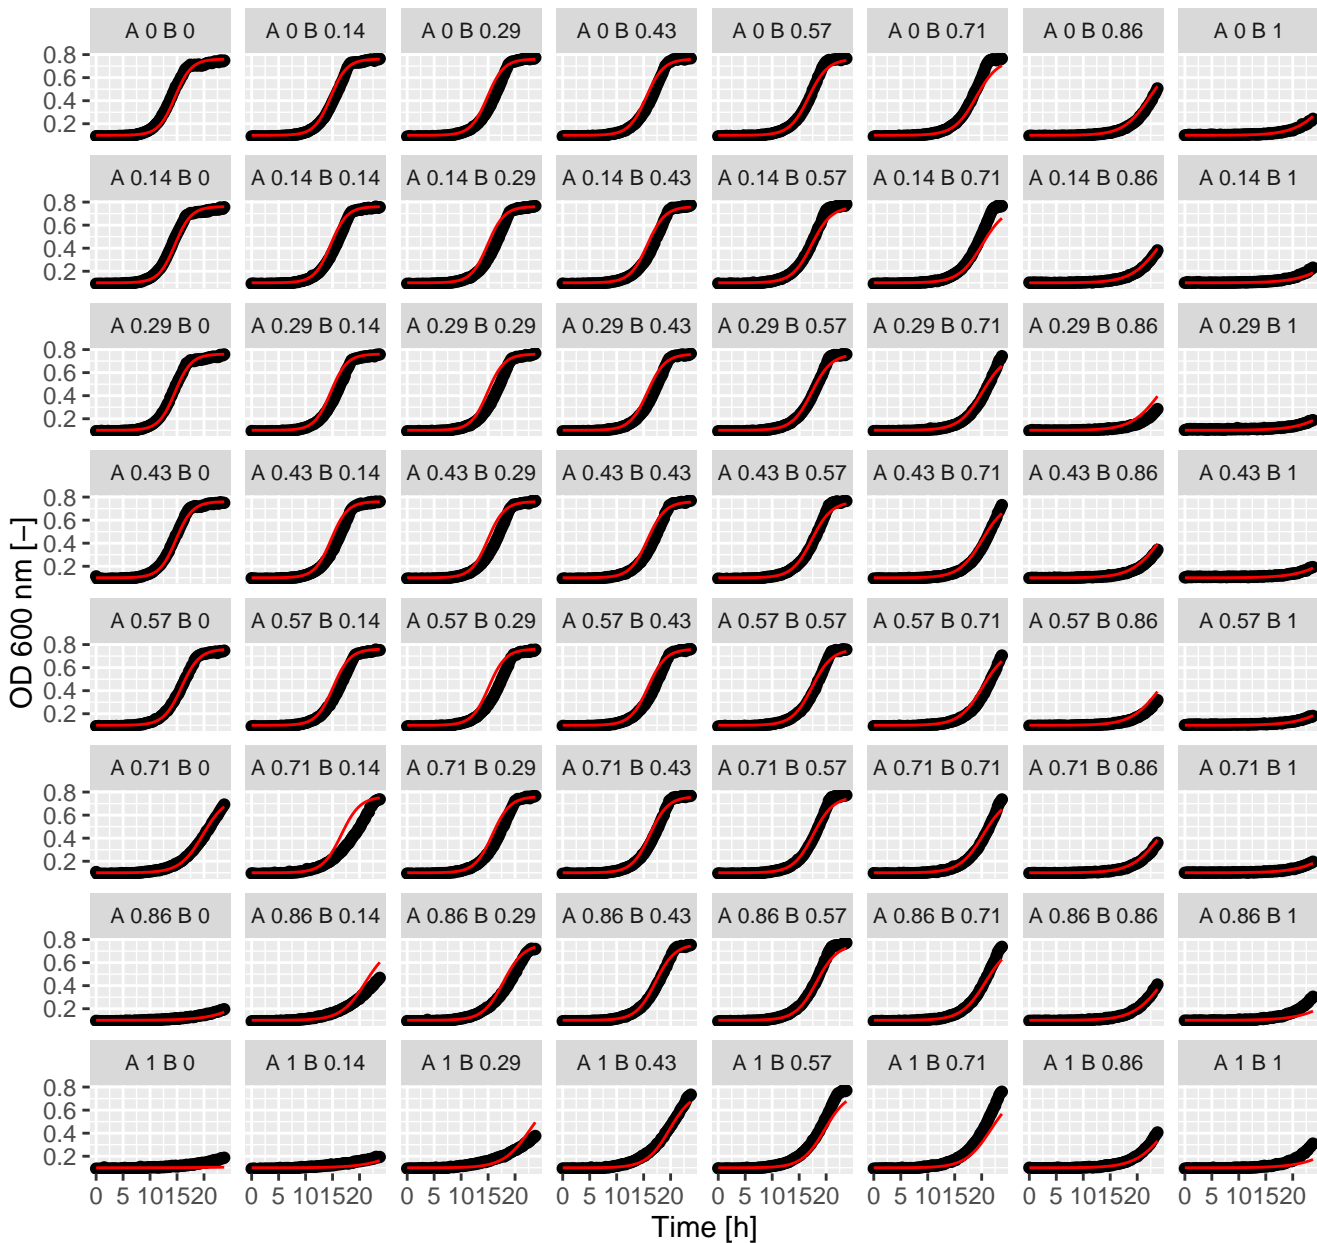

Rap.Sta (= Ax.Bx) exp. additivity (BI)  
 Int\_AB = 0 and Int\_BA = 0 at EC50

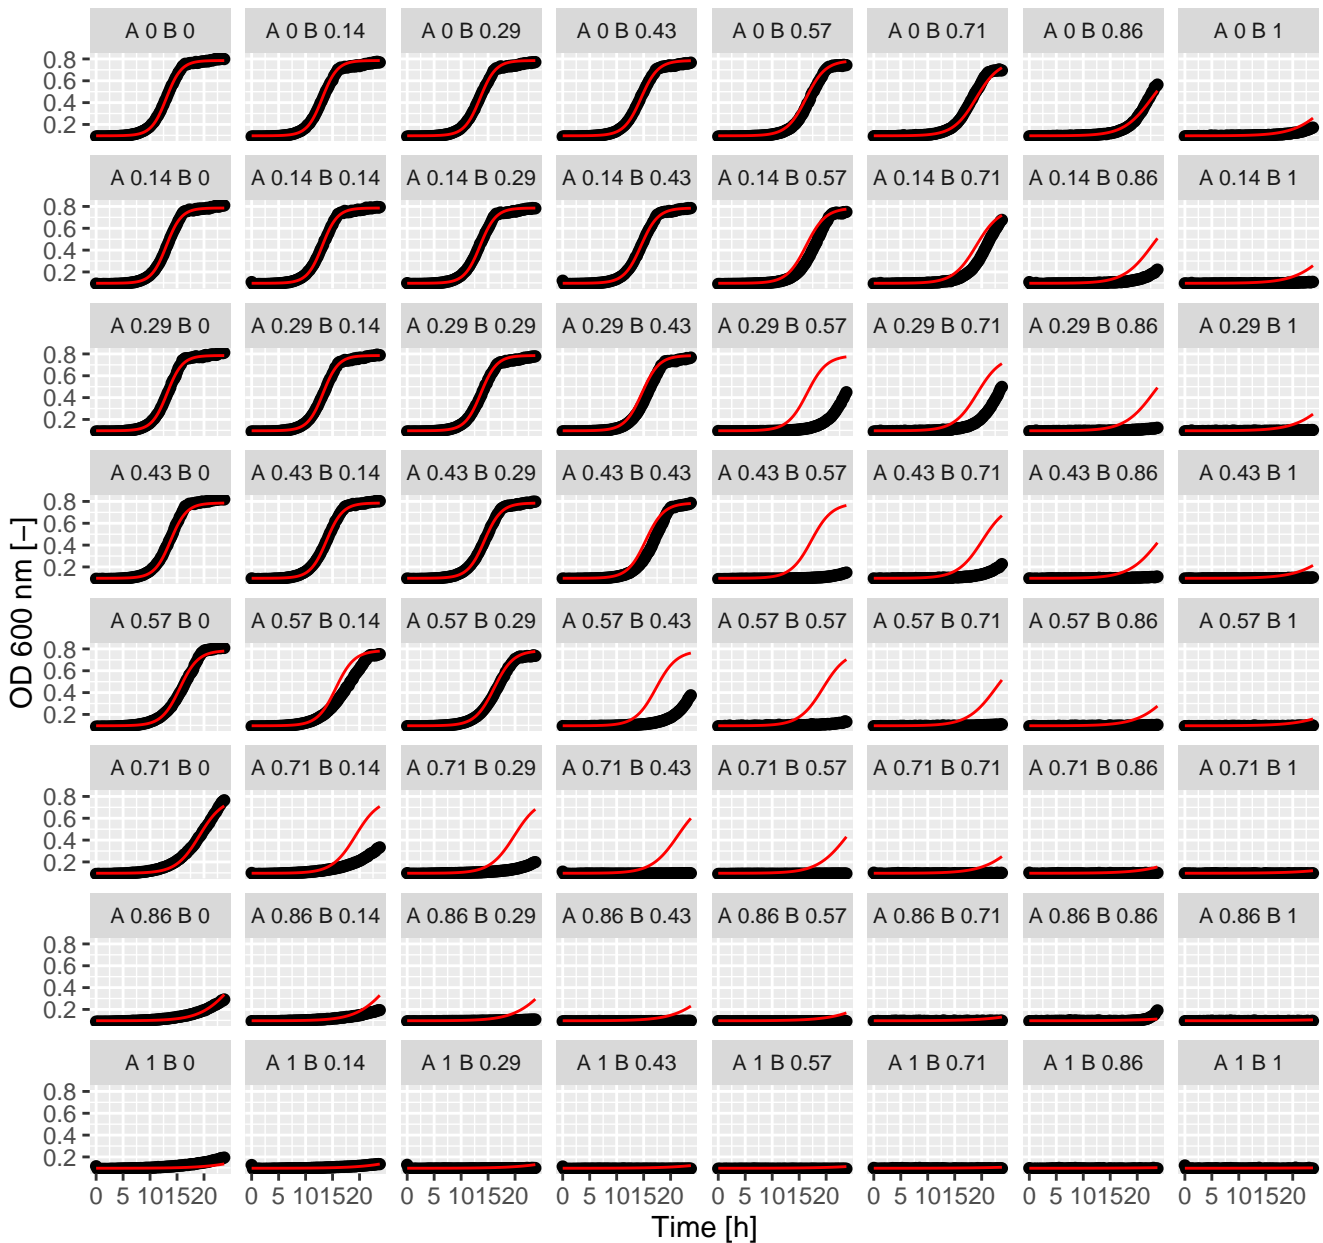

Rap.Sta (= Ax.Bx) full GPDI  
 Int\_AB = -0.1 and Int\_BA = -0.47 at EC50

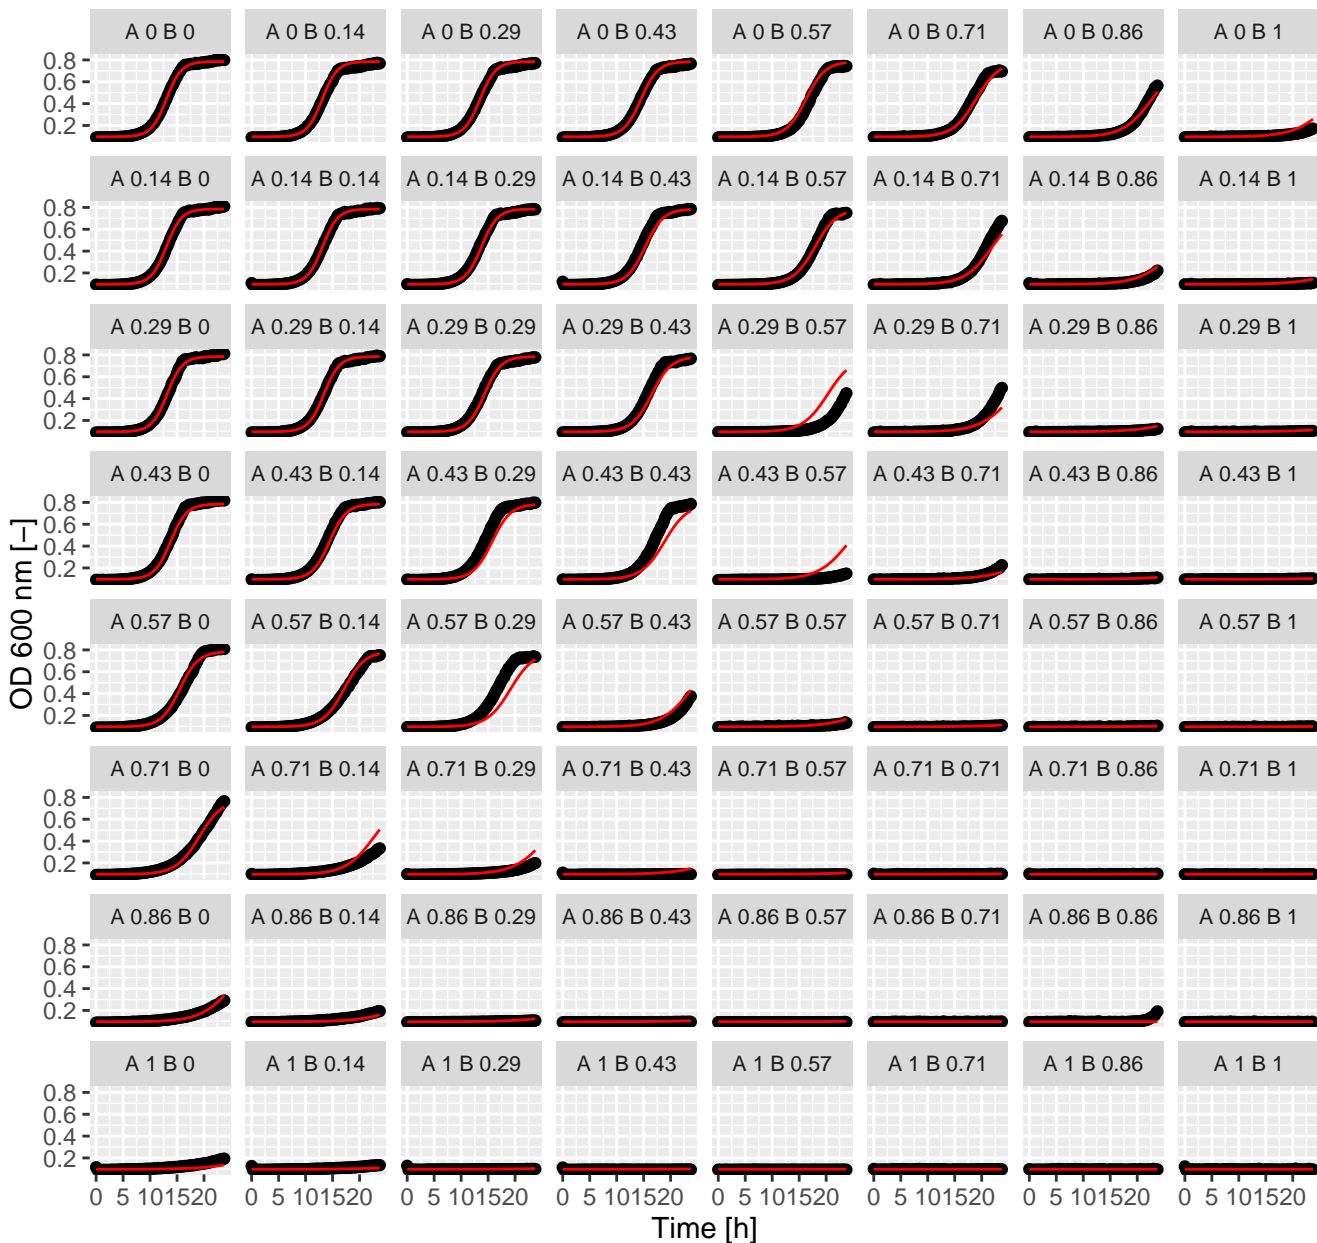



Rap.Rap (= Ax.Bx) exp. additivity (BI)  
Int\_AB = 0 and Int\_BA = 0 at EC50

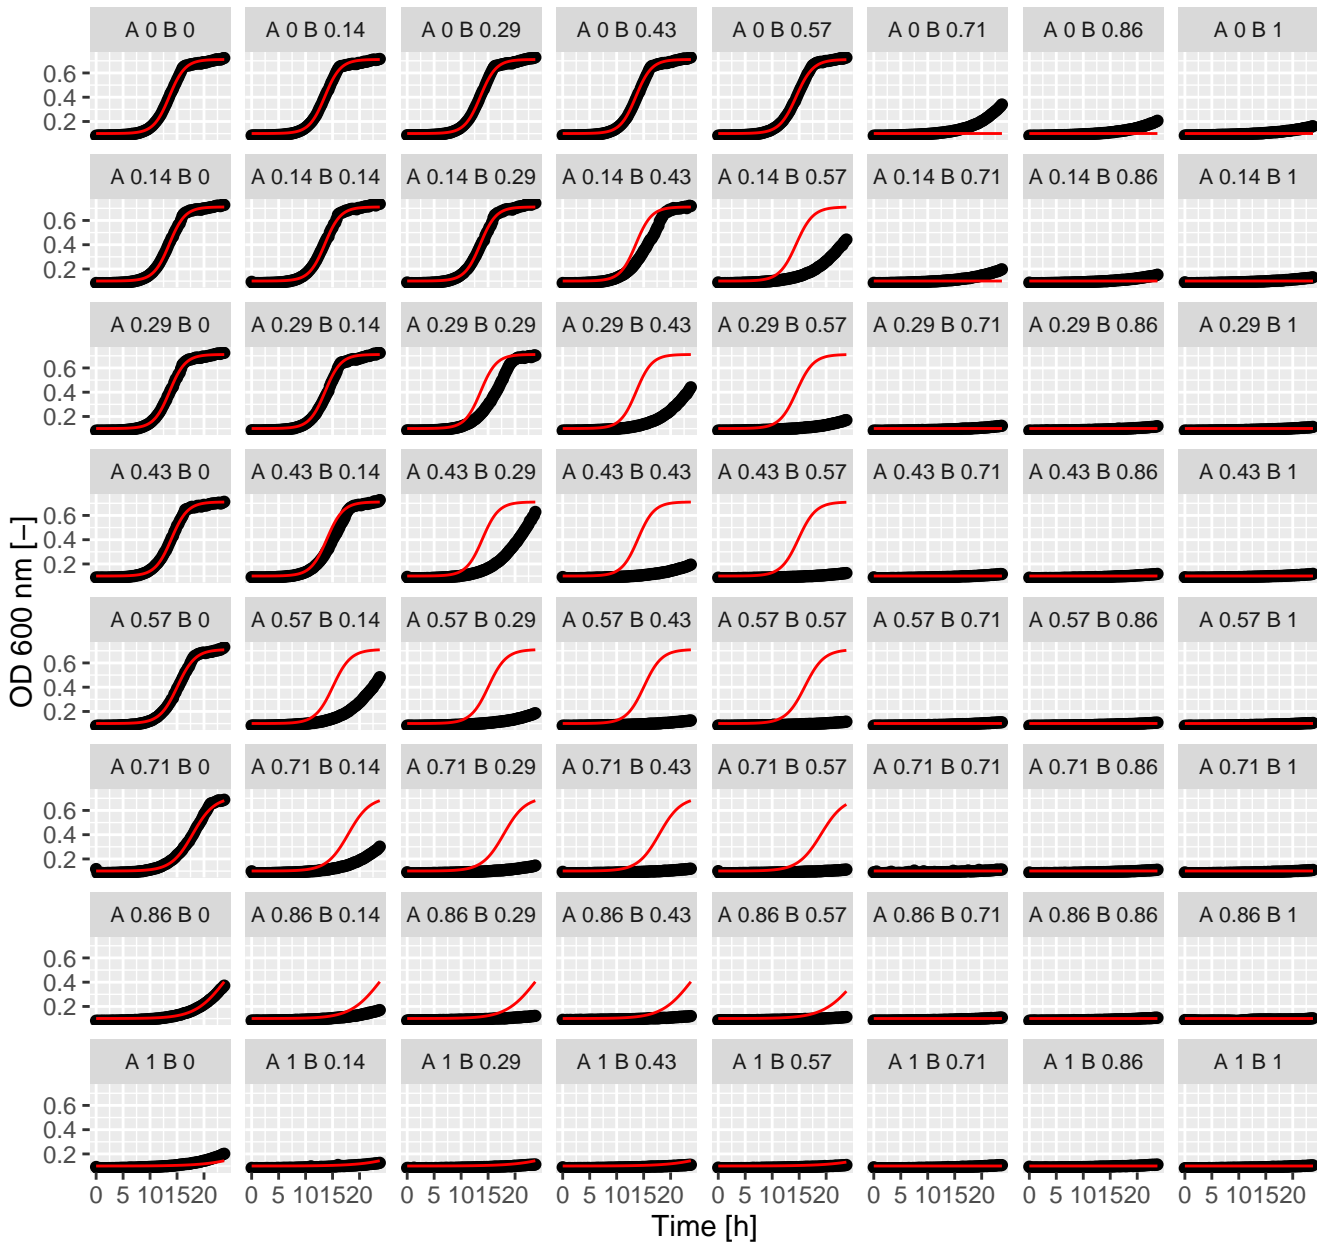

Rap.Rap (= Ax.Bx) full GPD1  
 Int\_AB = -0.64 and Int\_BA = -0.28 at EC50

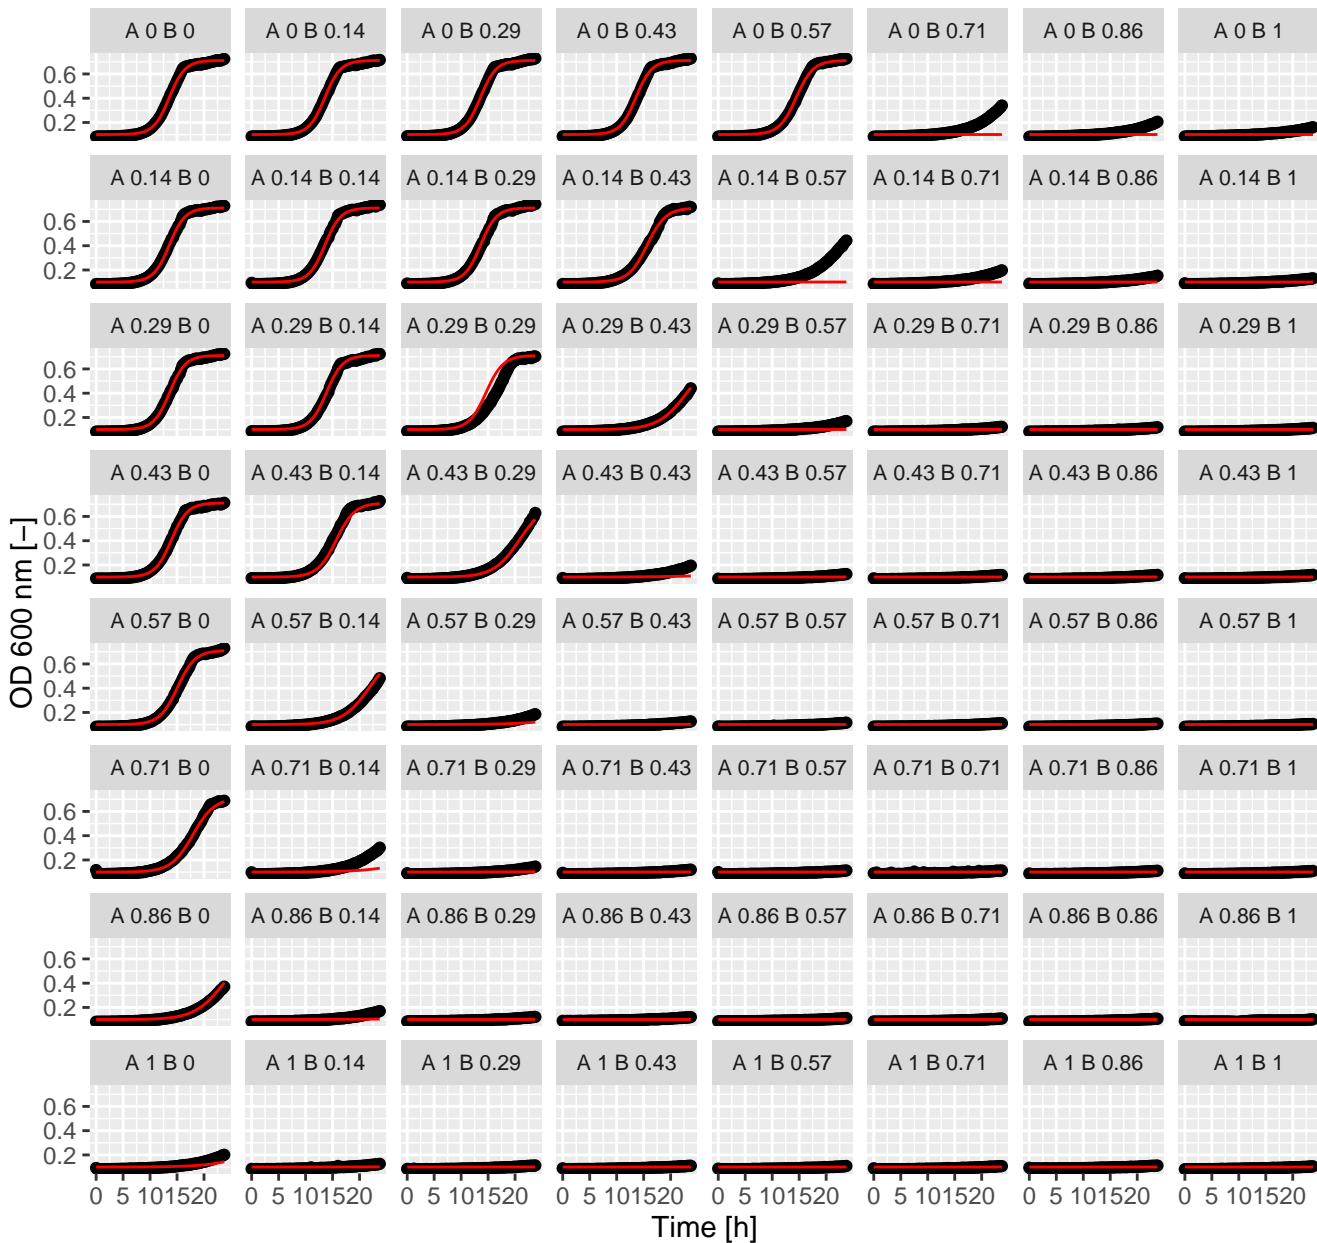

Rad.Ter (= Ax.Bx) exp. additivity (BI)  
Int\_AB = 0 and Int\_BA = 0 at EC50

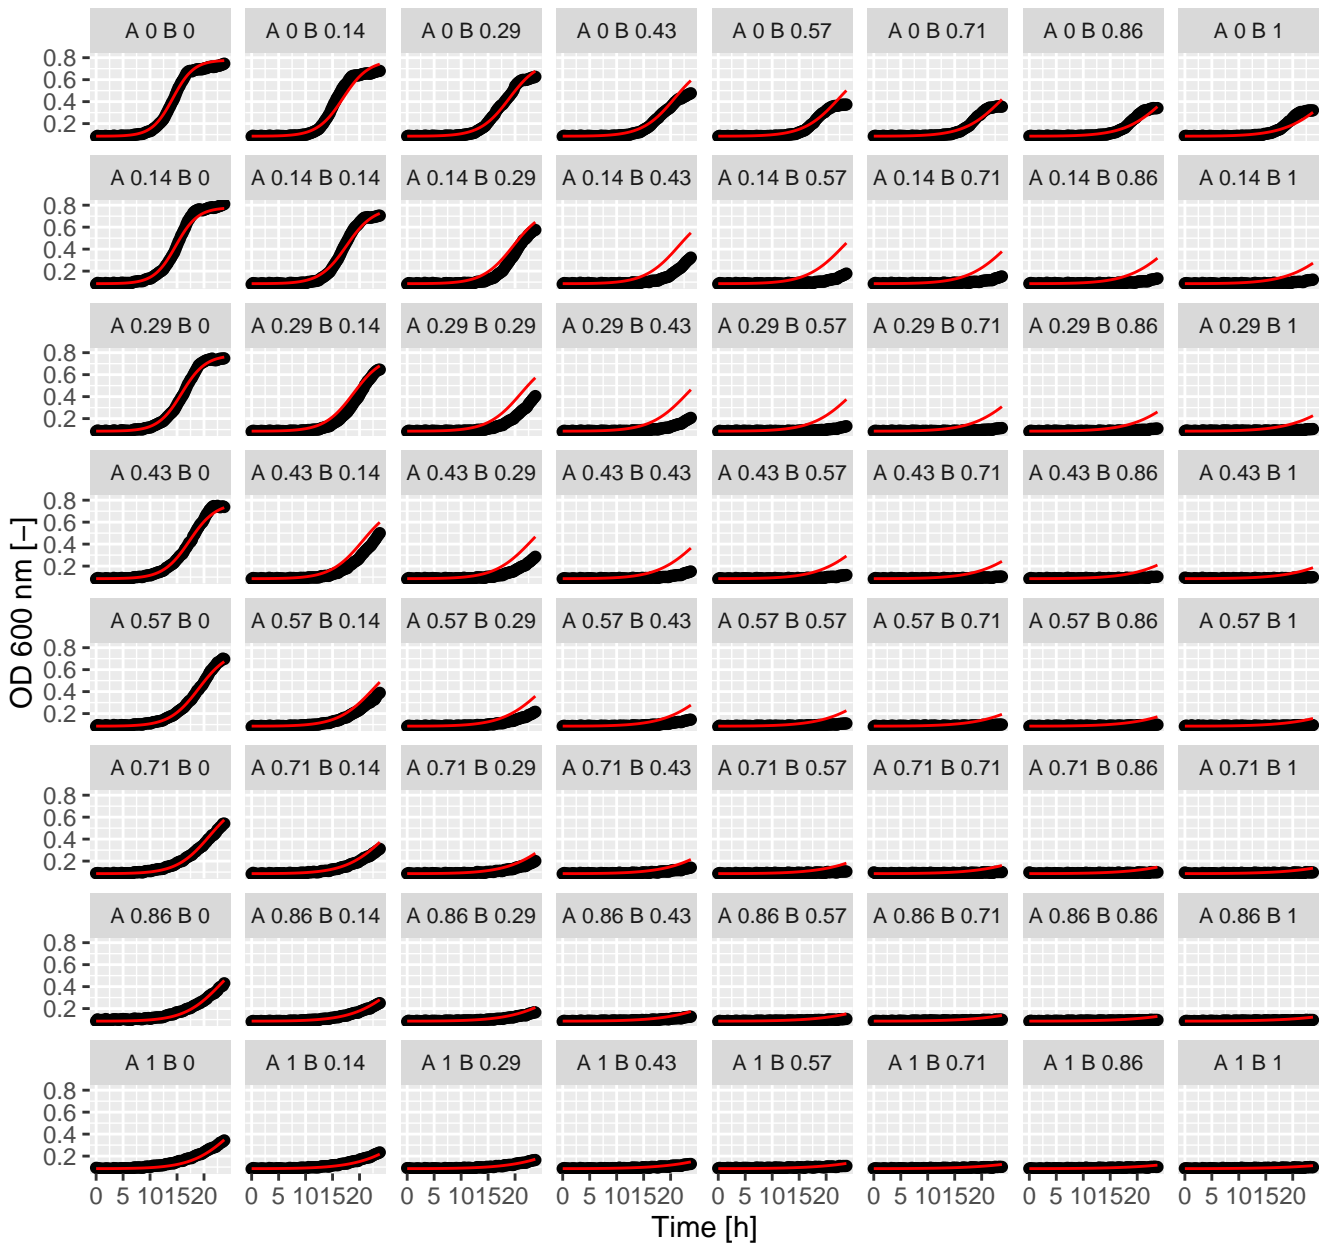

Rad.Ter (= Ax.Bx) full GPDI  
Int\_AB = -0.73 and Int\_BA = -0.09 at EC50

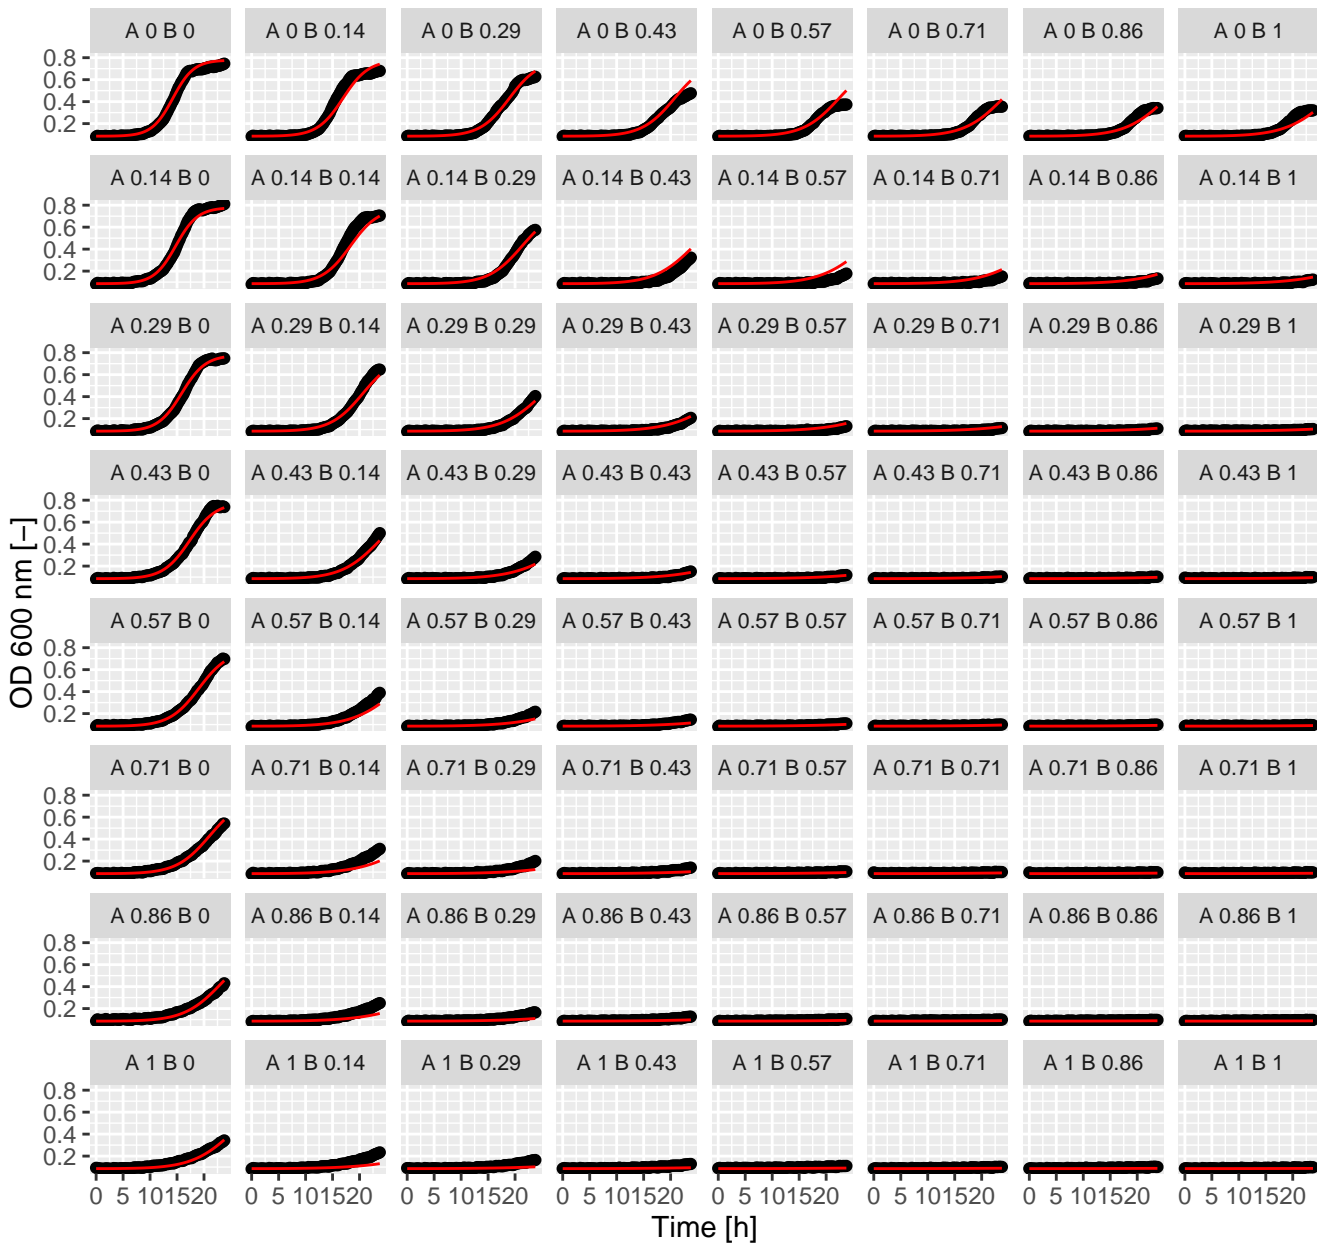

Rad.Tac (= Ax.Bx) exp. additivity (BI)  
 Int\_AB = 0 and Int\_BA = 0 at EC50

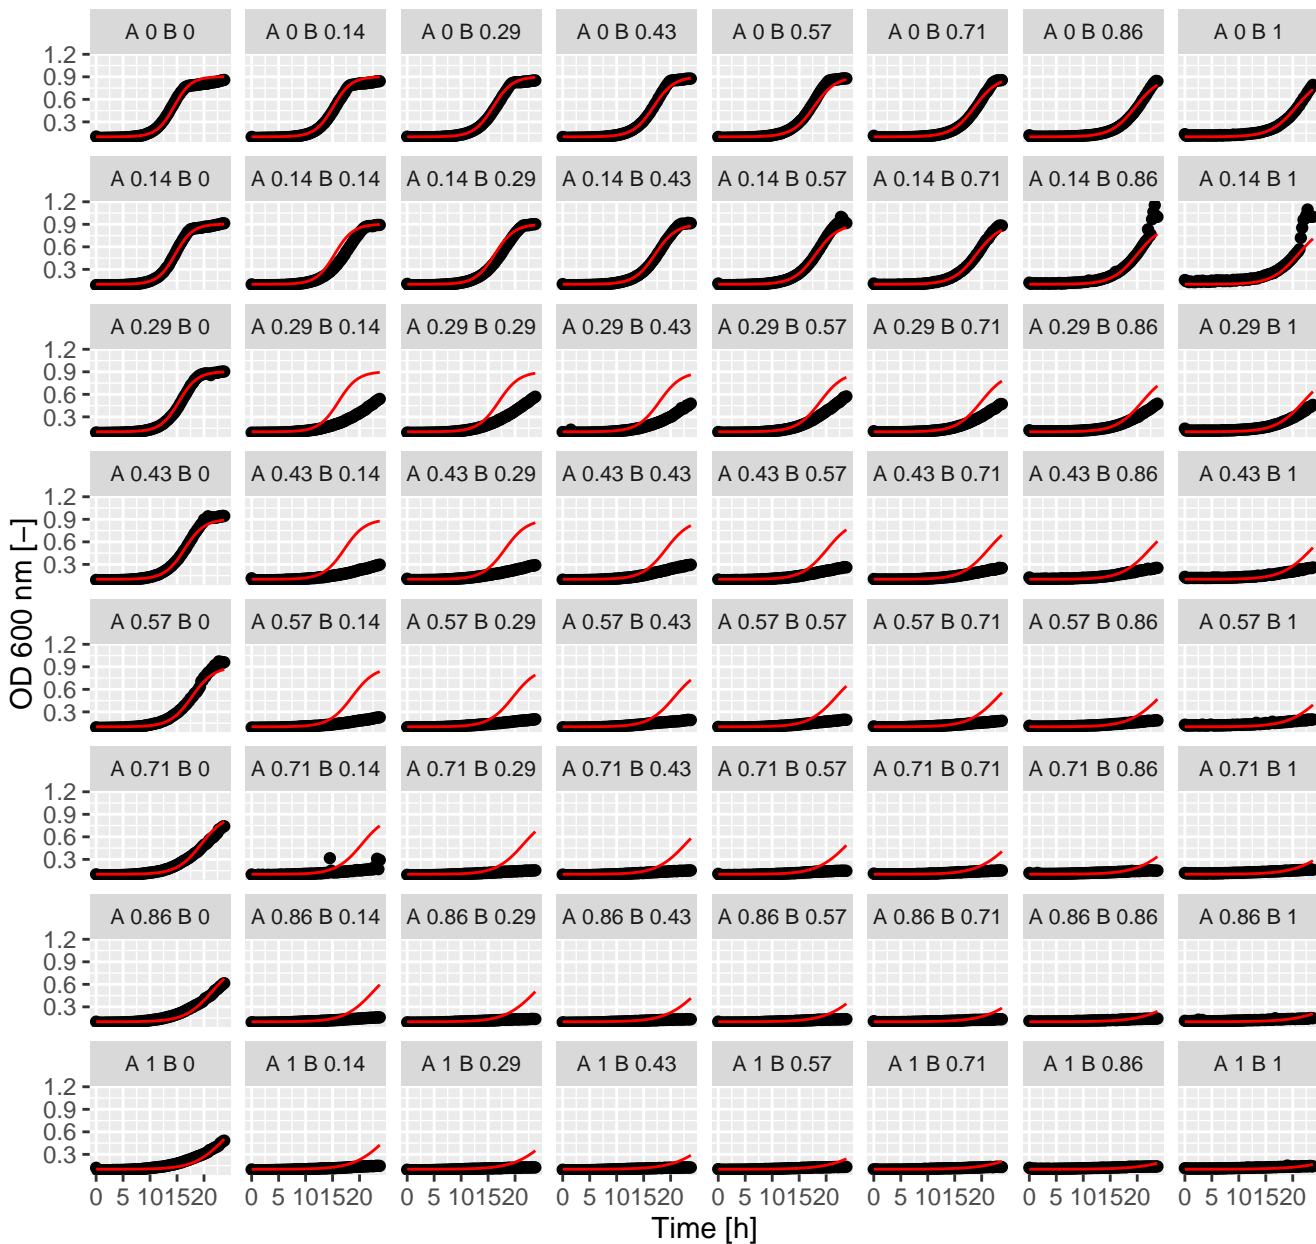

Rad.Tac (= Ax.Bx) full GPDI  
Int\_AB = -0.63 and Int\_BA = 1.12 at EC50

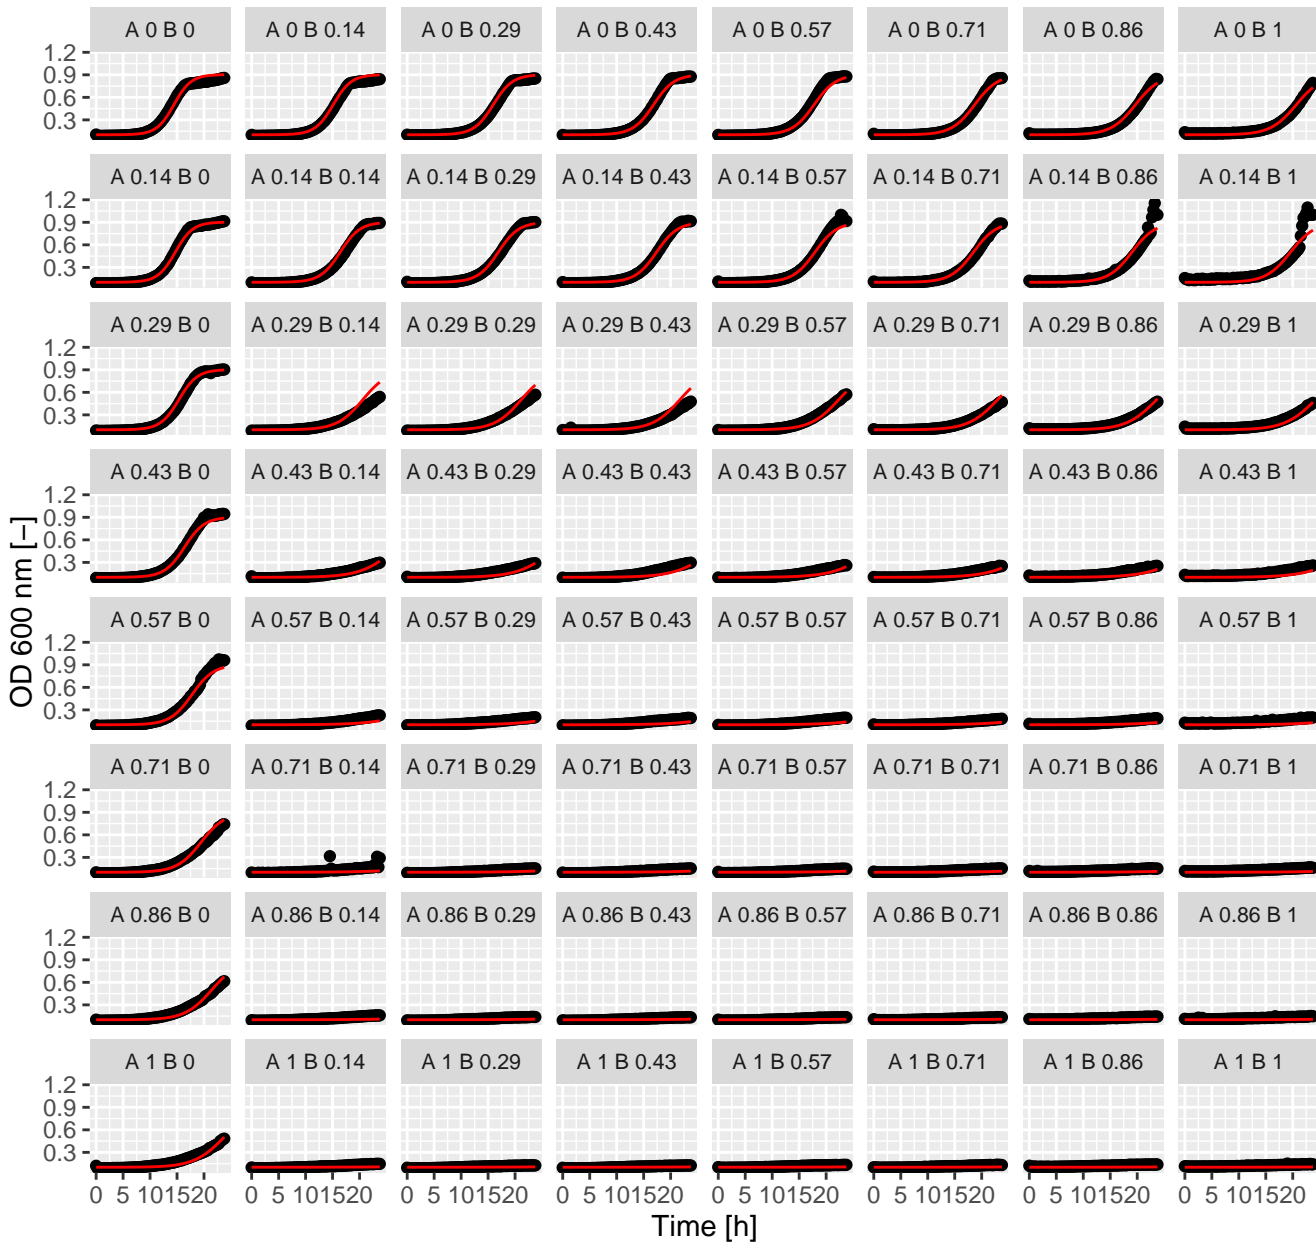

Rad.Sta (= Ax.Bx) exp. additivity (BI)  
Int\_AB = 0 and Int\_BA = 0 at EC50

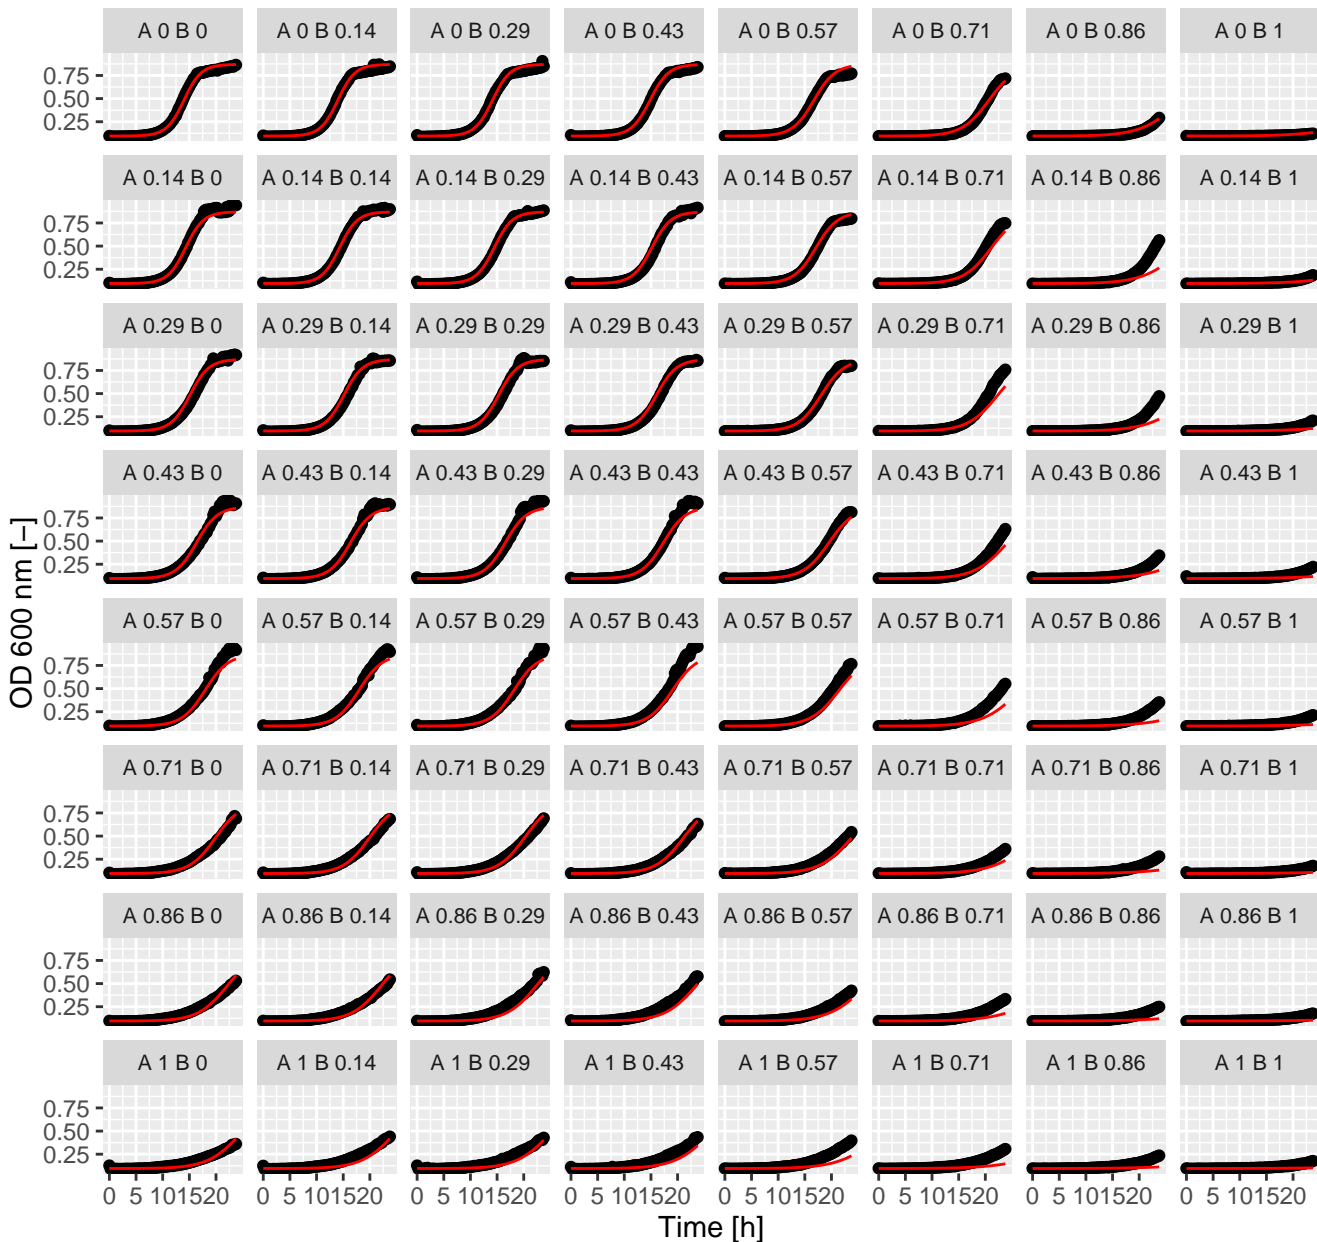

Rad.Sta (= Ax.Bx) full GPD1  
Int\_AB = 0.04 and Int\_BA = 0.27 at EC50

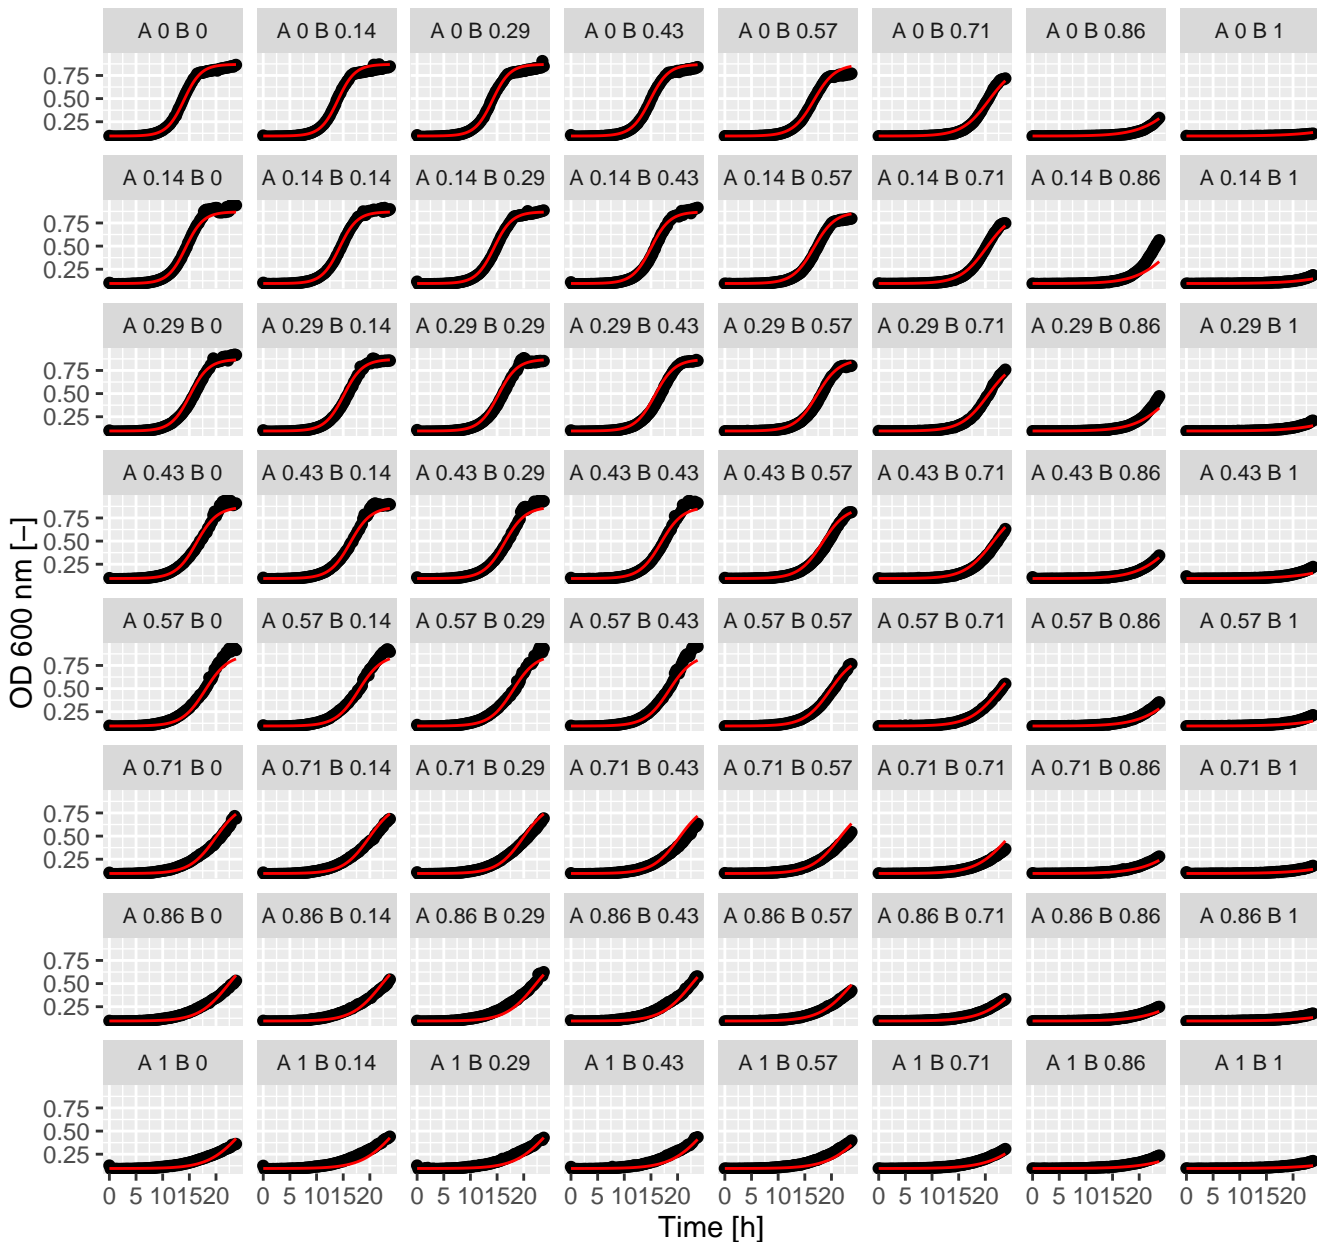



Rad.Rap (= Ax.Bx) exp. additivity (BI)  
Int\_AB = 0 and Int\_BA = 0 at EC50

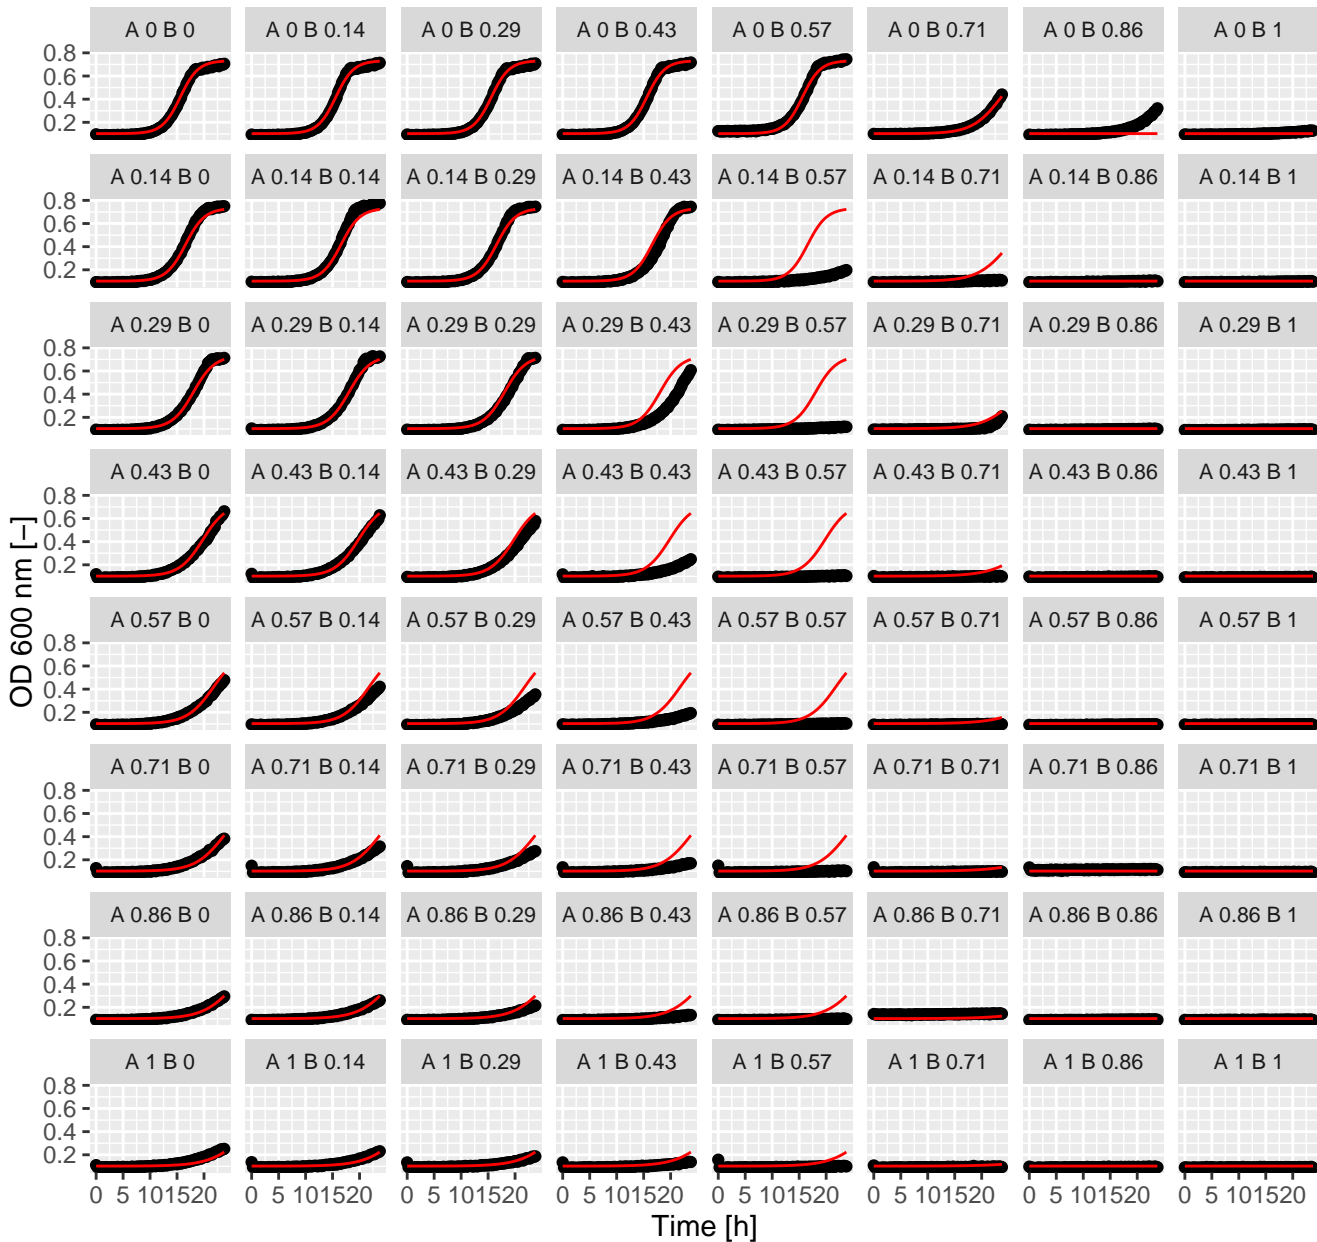

Rad.Rap (= Ax.Bx) full GPDI  
Int\_AB = -0.42 and Int\_BA = -0.51 at EC50

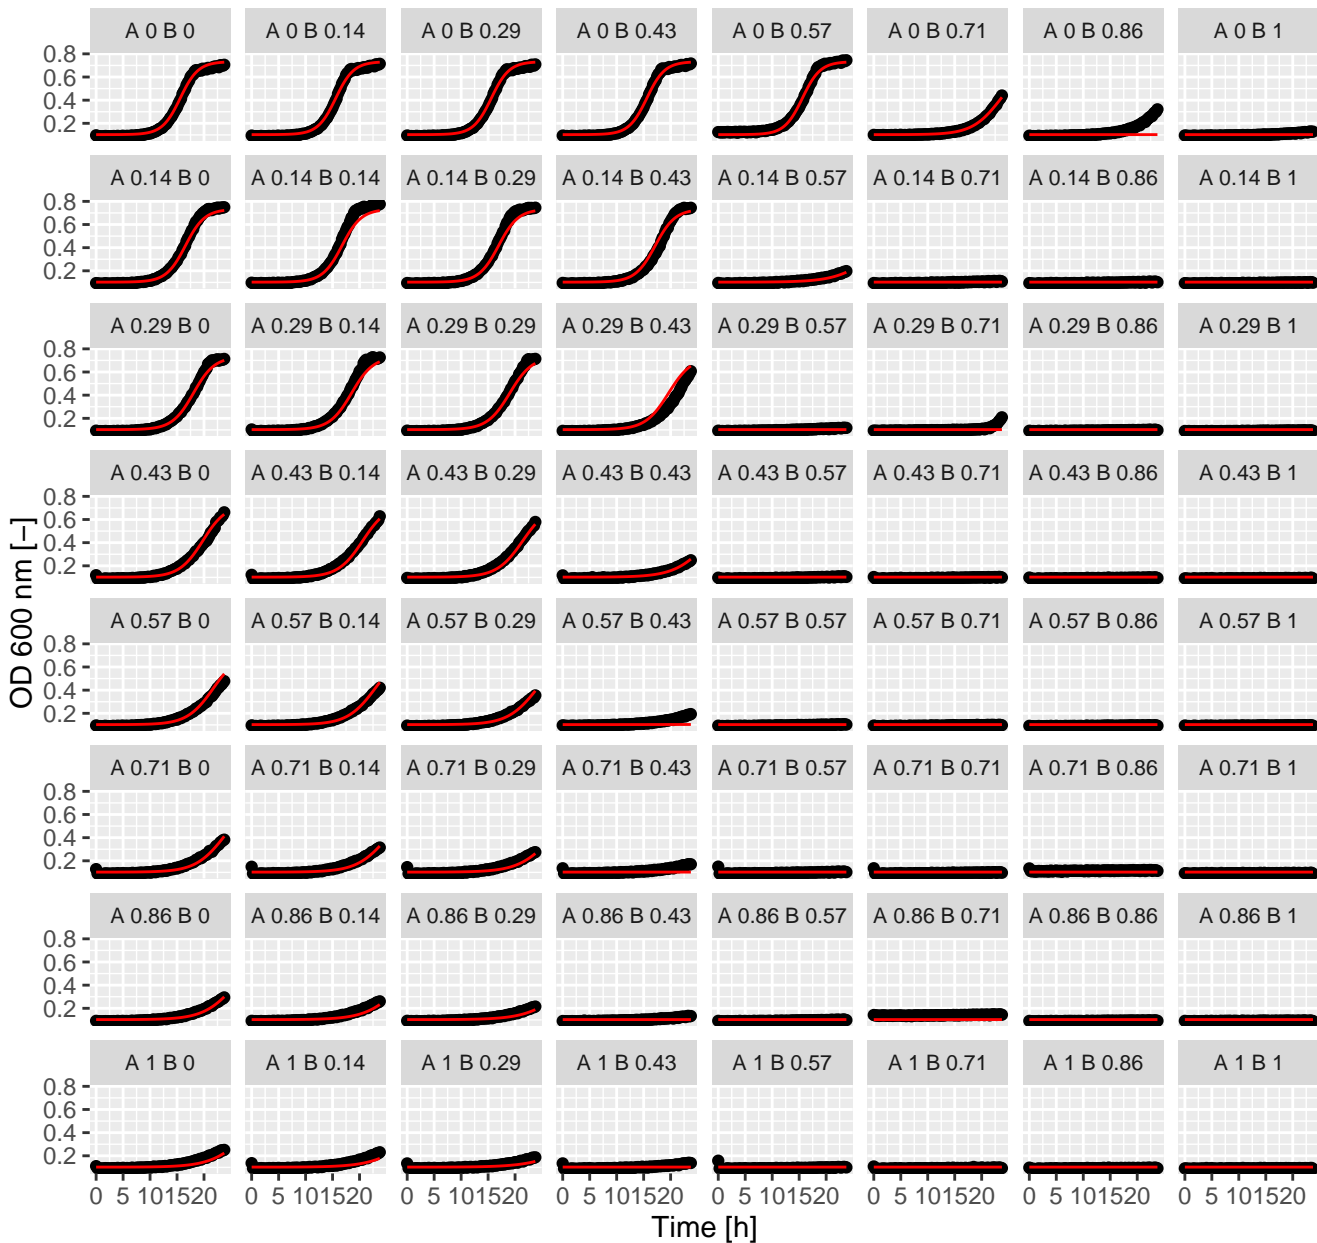

Qnn.Rad (= Ax.Bx) exp. additivity (BI)  
Int\_AB = 0 and Int\_BA = 0 at EC50

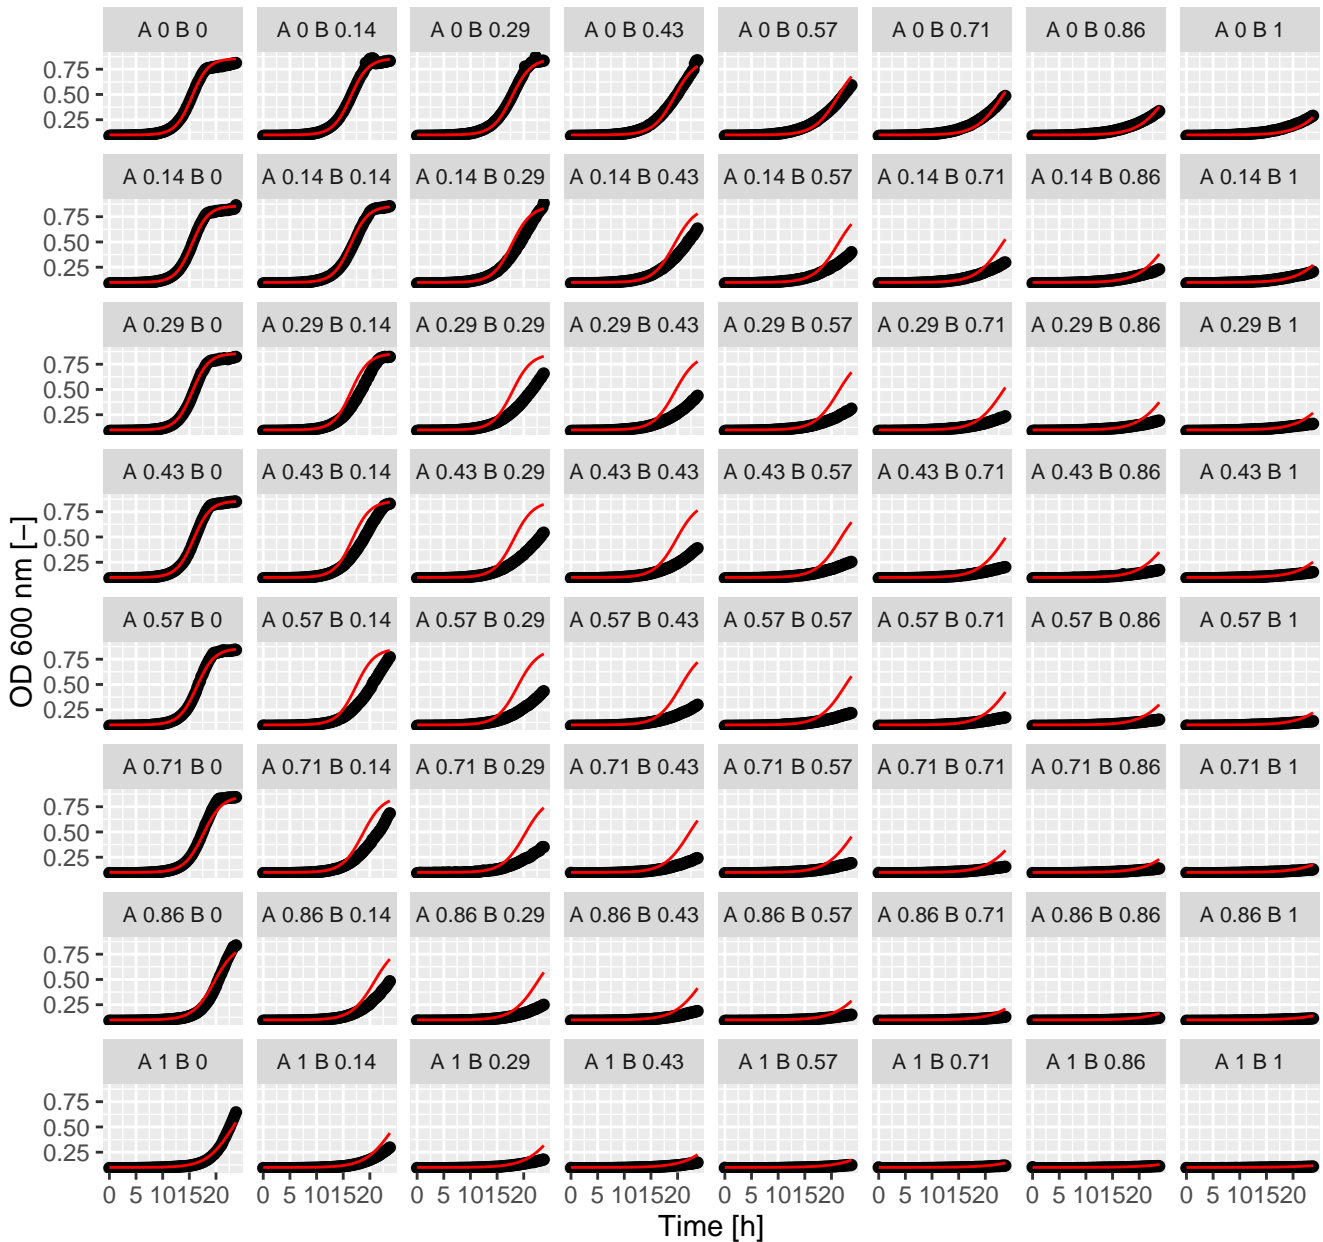

Qnn.Rad (= Ax.Bx) full GPDI  
Int\_AB = 0.37 and Int\_BA = -0.68 at EC50

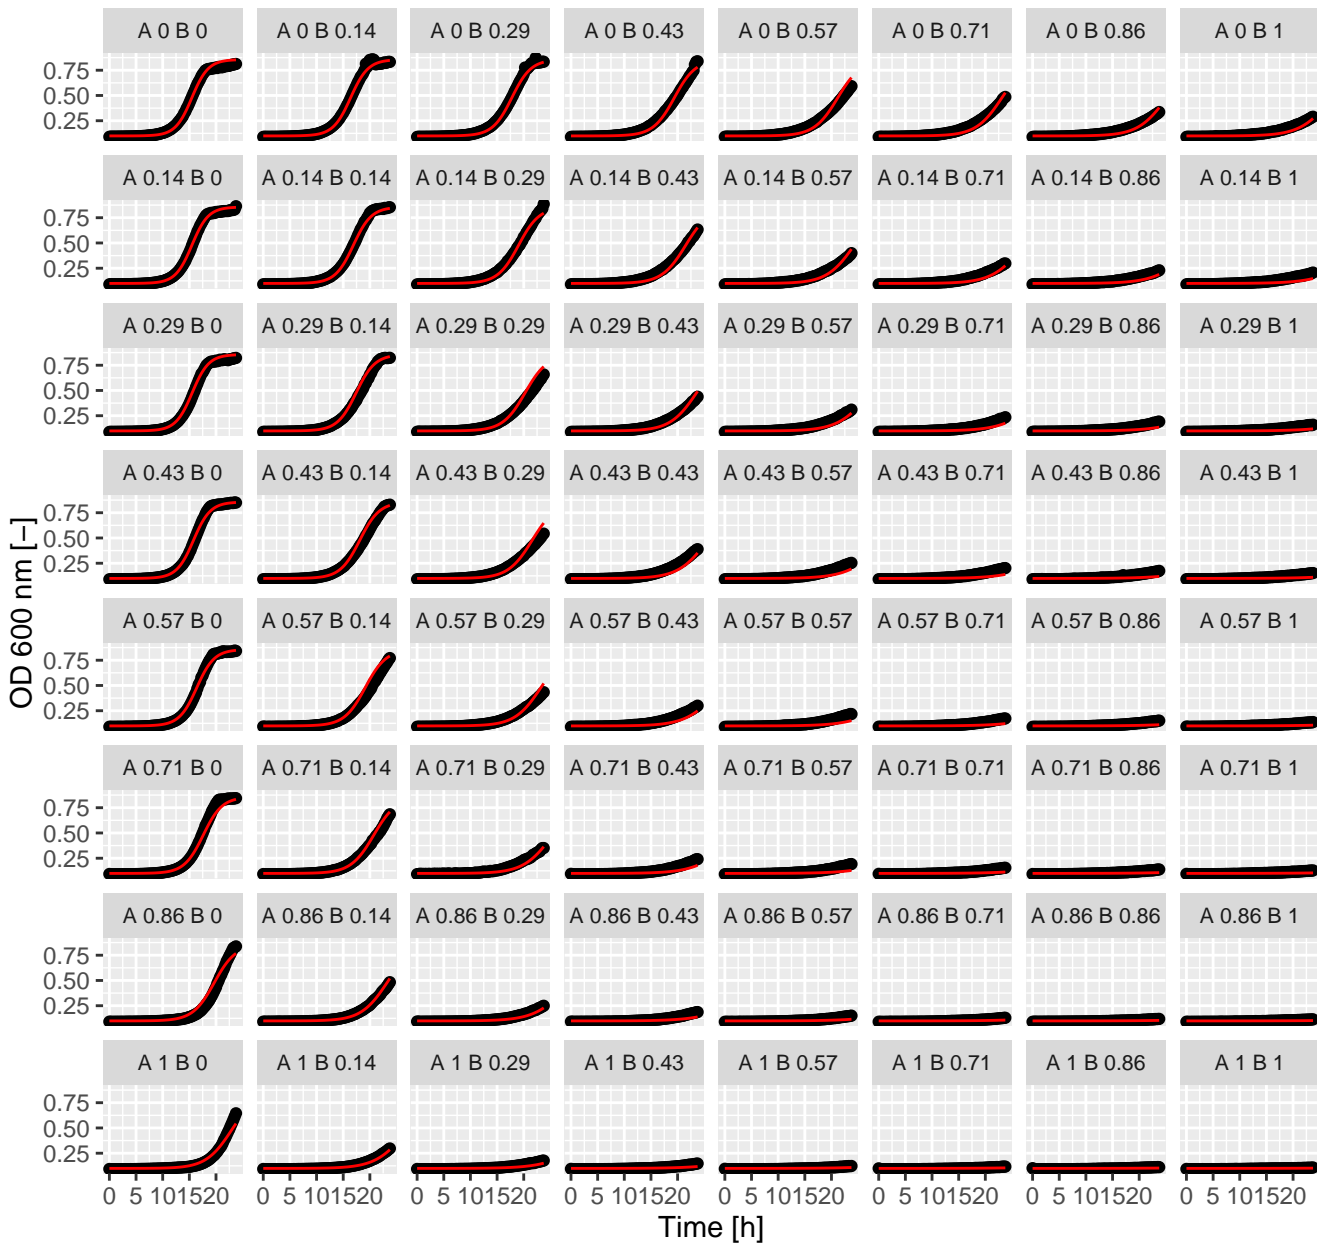

Qmy.Ter (= Ax.Bx) exp. additivity (BI)  
 Int\_AB = 0 and Int\_BA = 0 at EC50

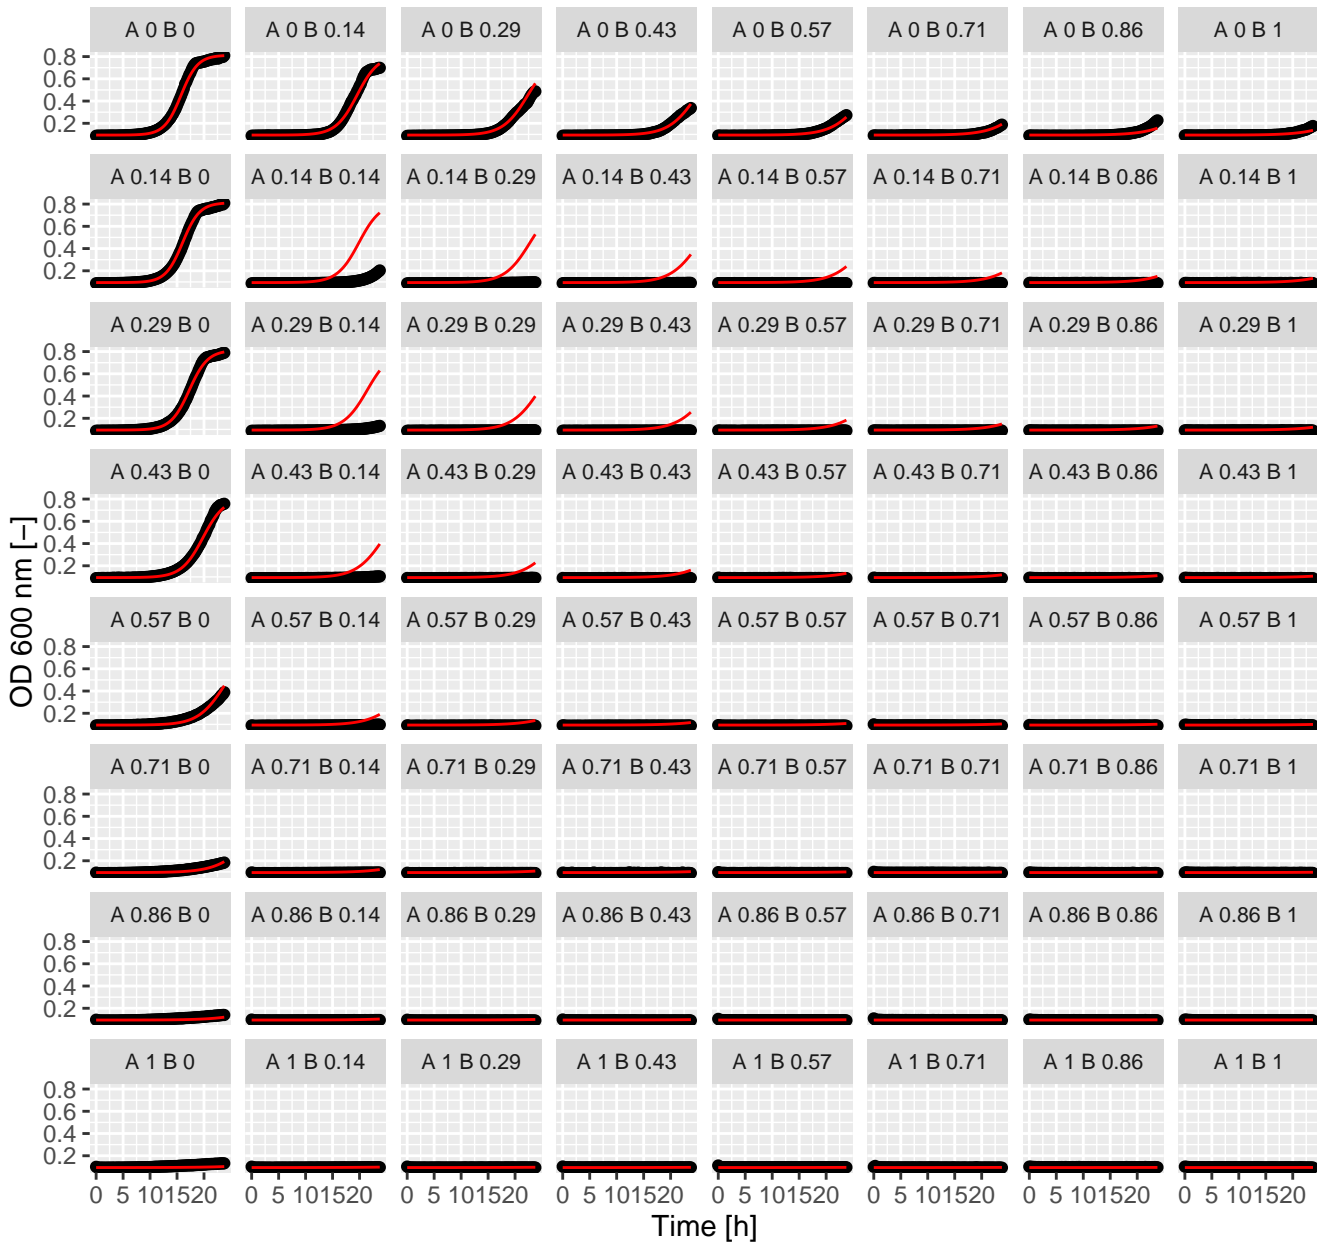

Qmy.Ter (= Ax.Bx) full GPDI  
Int\_AB = -0.88 and Int\_BA = -0.7 at EC50

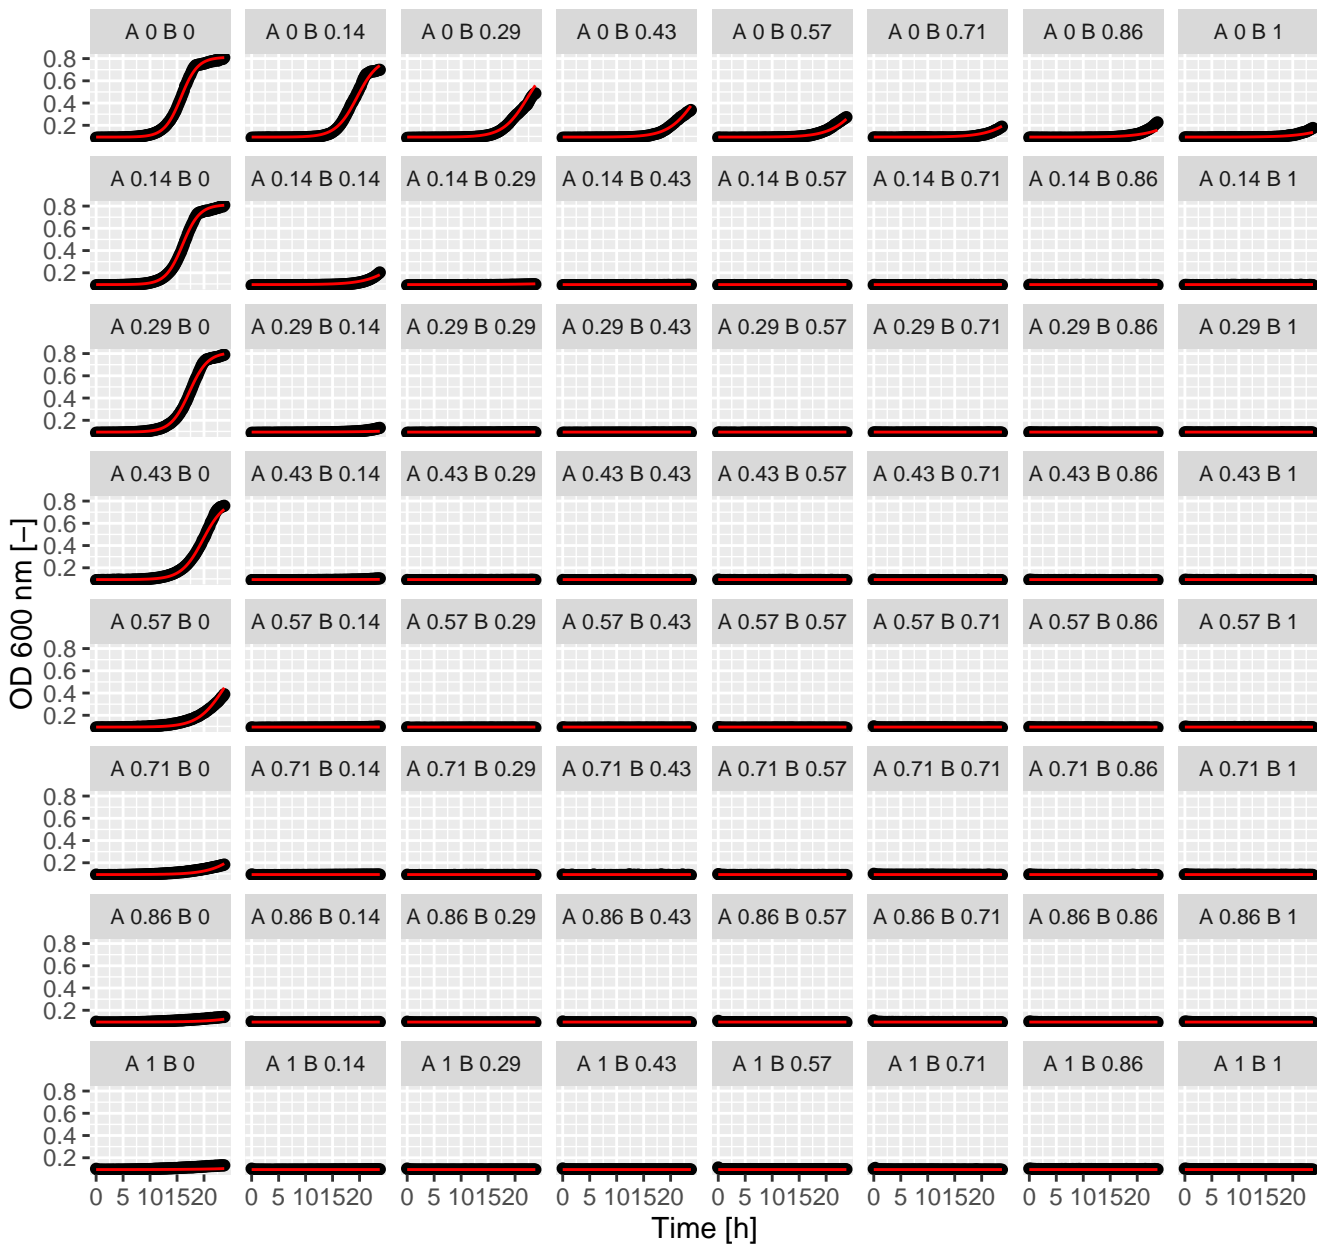

Qmy.Tac (= Ax.Bx) exp. additivity (BI)  
Int\_AB = 0 and Int\_BA = 0 at EC50

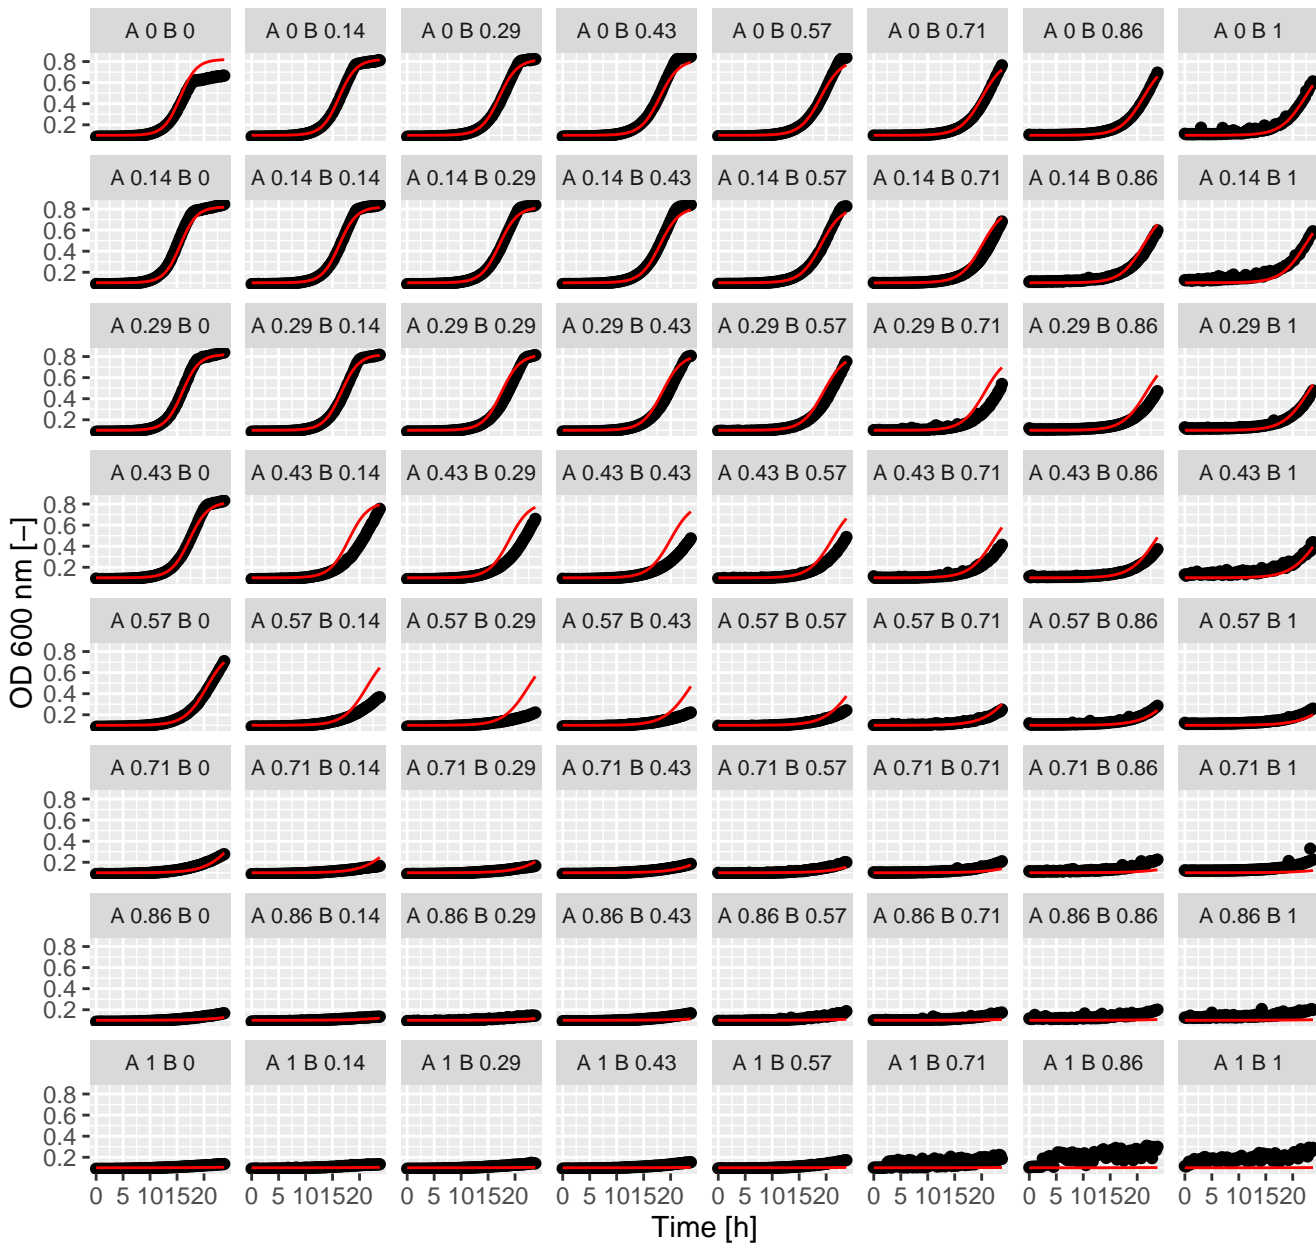

Qmy.Tac (= Ax.Bx) full GPD1  
Int\_AB = -0.16 and Int\_BA = -0.1 at EC50

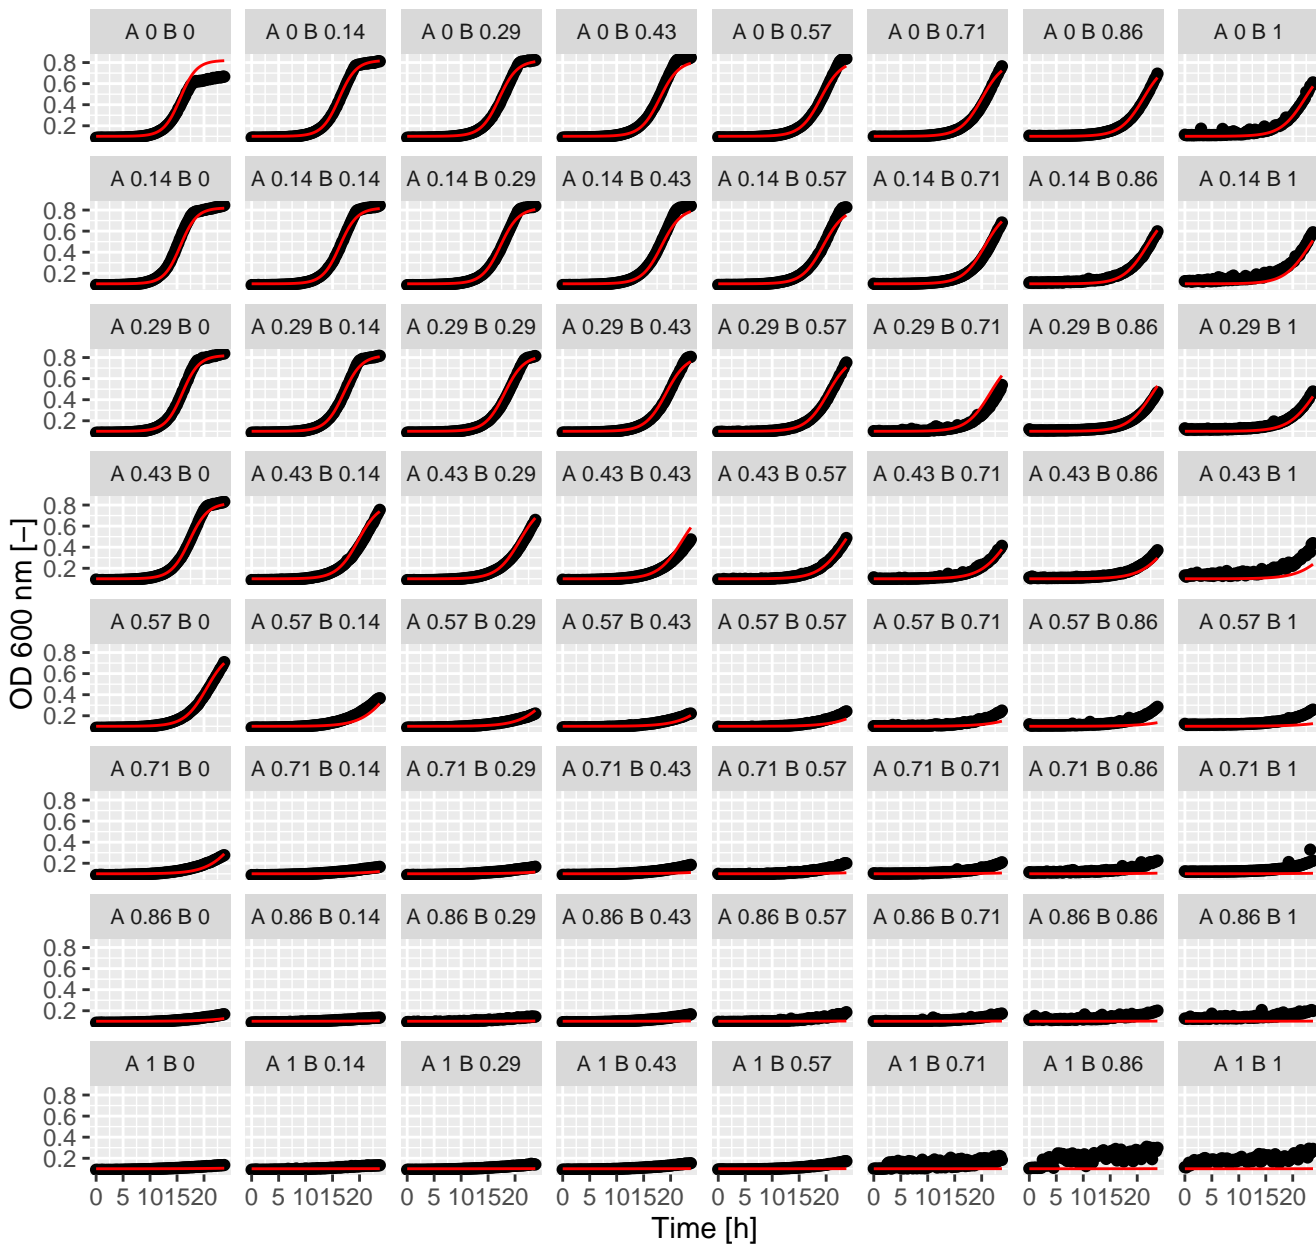



Qmy.Sta (= Ax.Bx) exp. additivity (BI)  
Int\_AB = 0 and Int\_BA = 0 at EC50

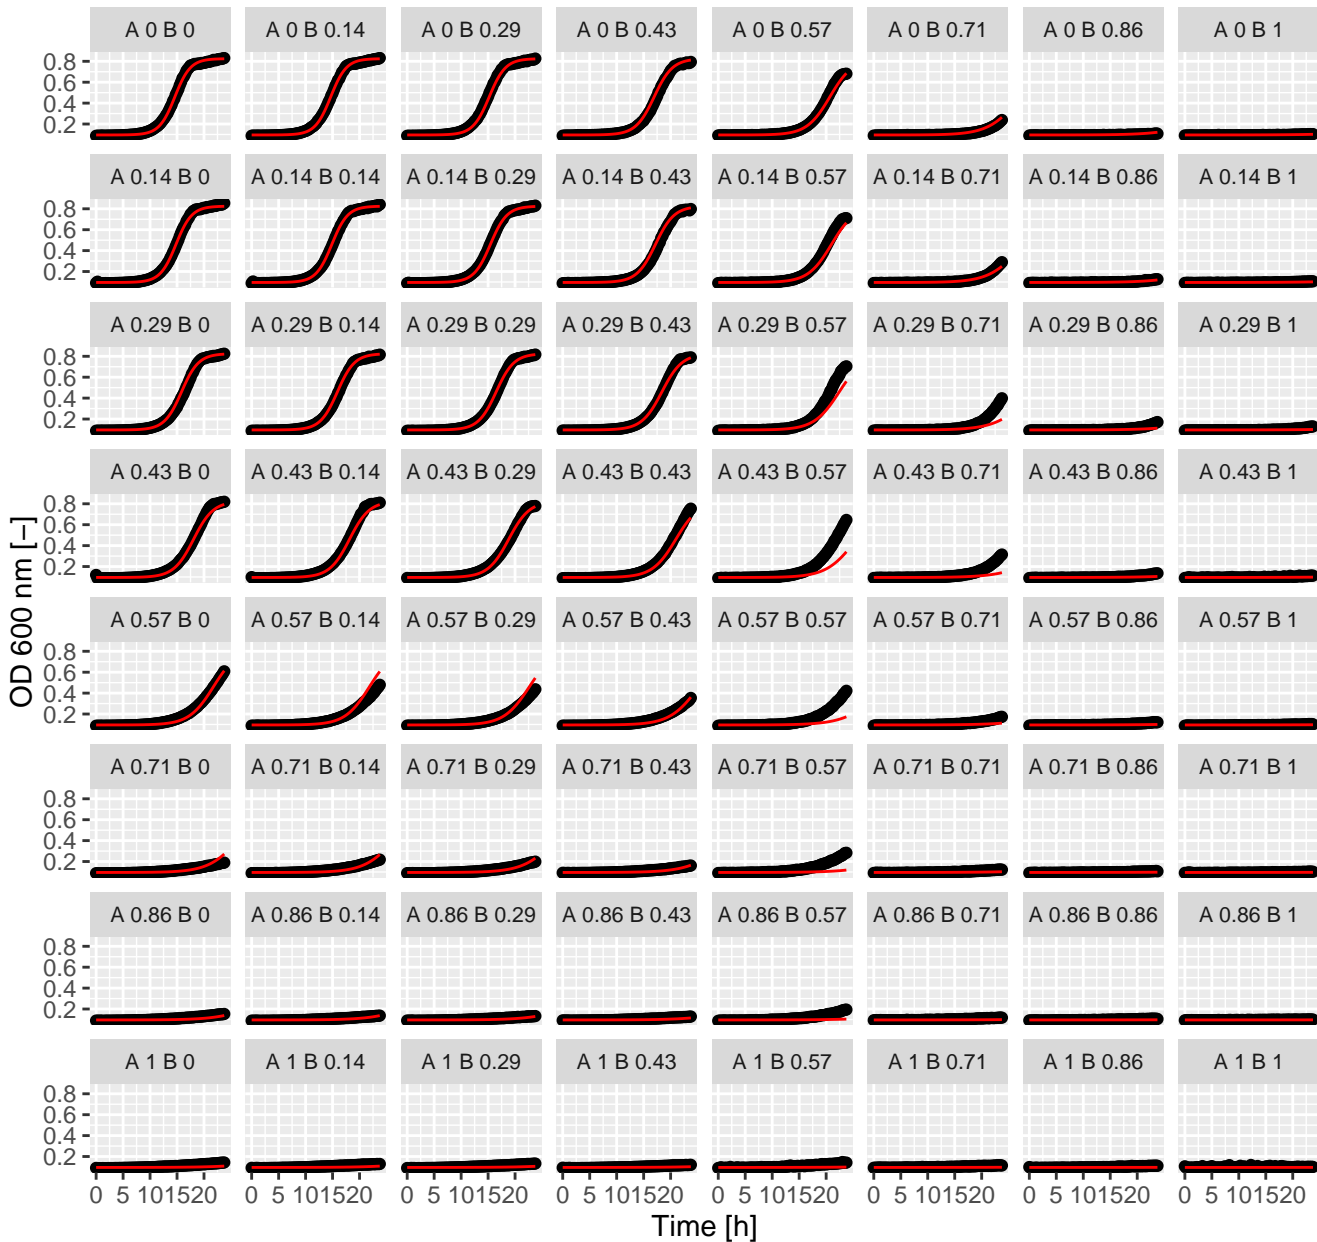

Qmy.Sta (= Ax.Bx) full GPD1  
Int\_AB = 0 and Int\_BA = 0.28 at EC50

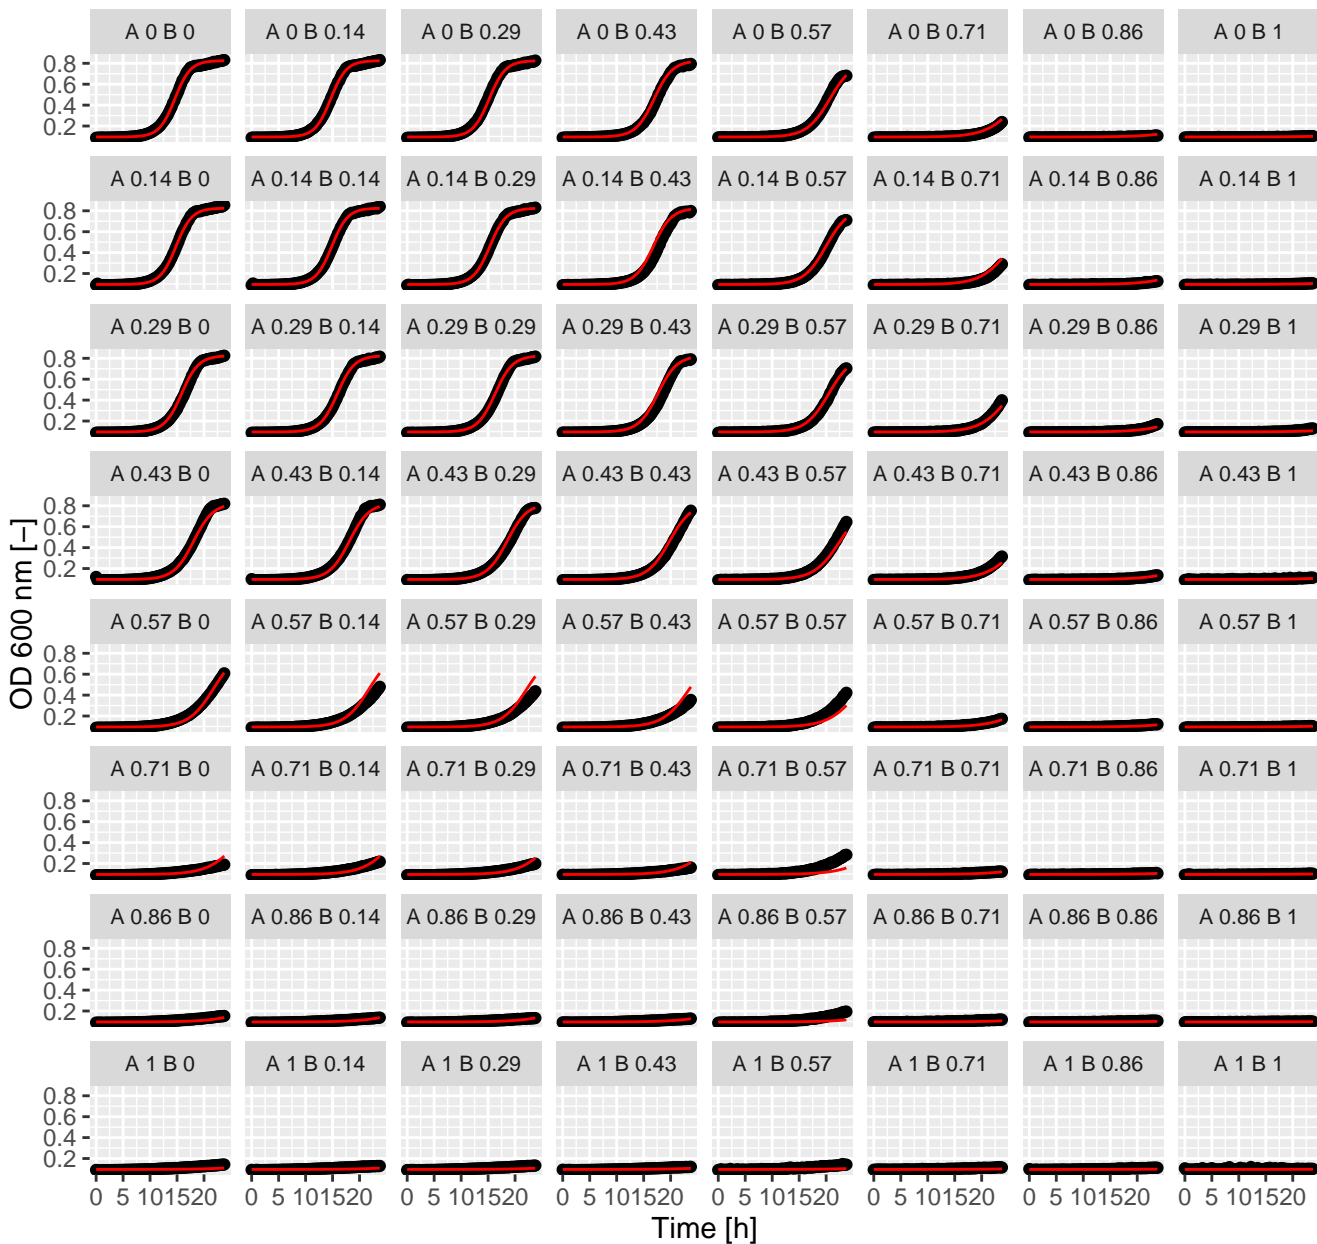

Qmy.Qmy (= Ax.Bx) exp. additivity (BI)  
 Int\_AB = 0 and Int\_BA = 0 at EC50

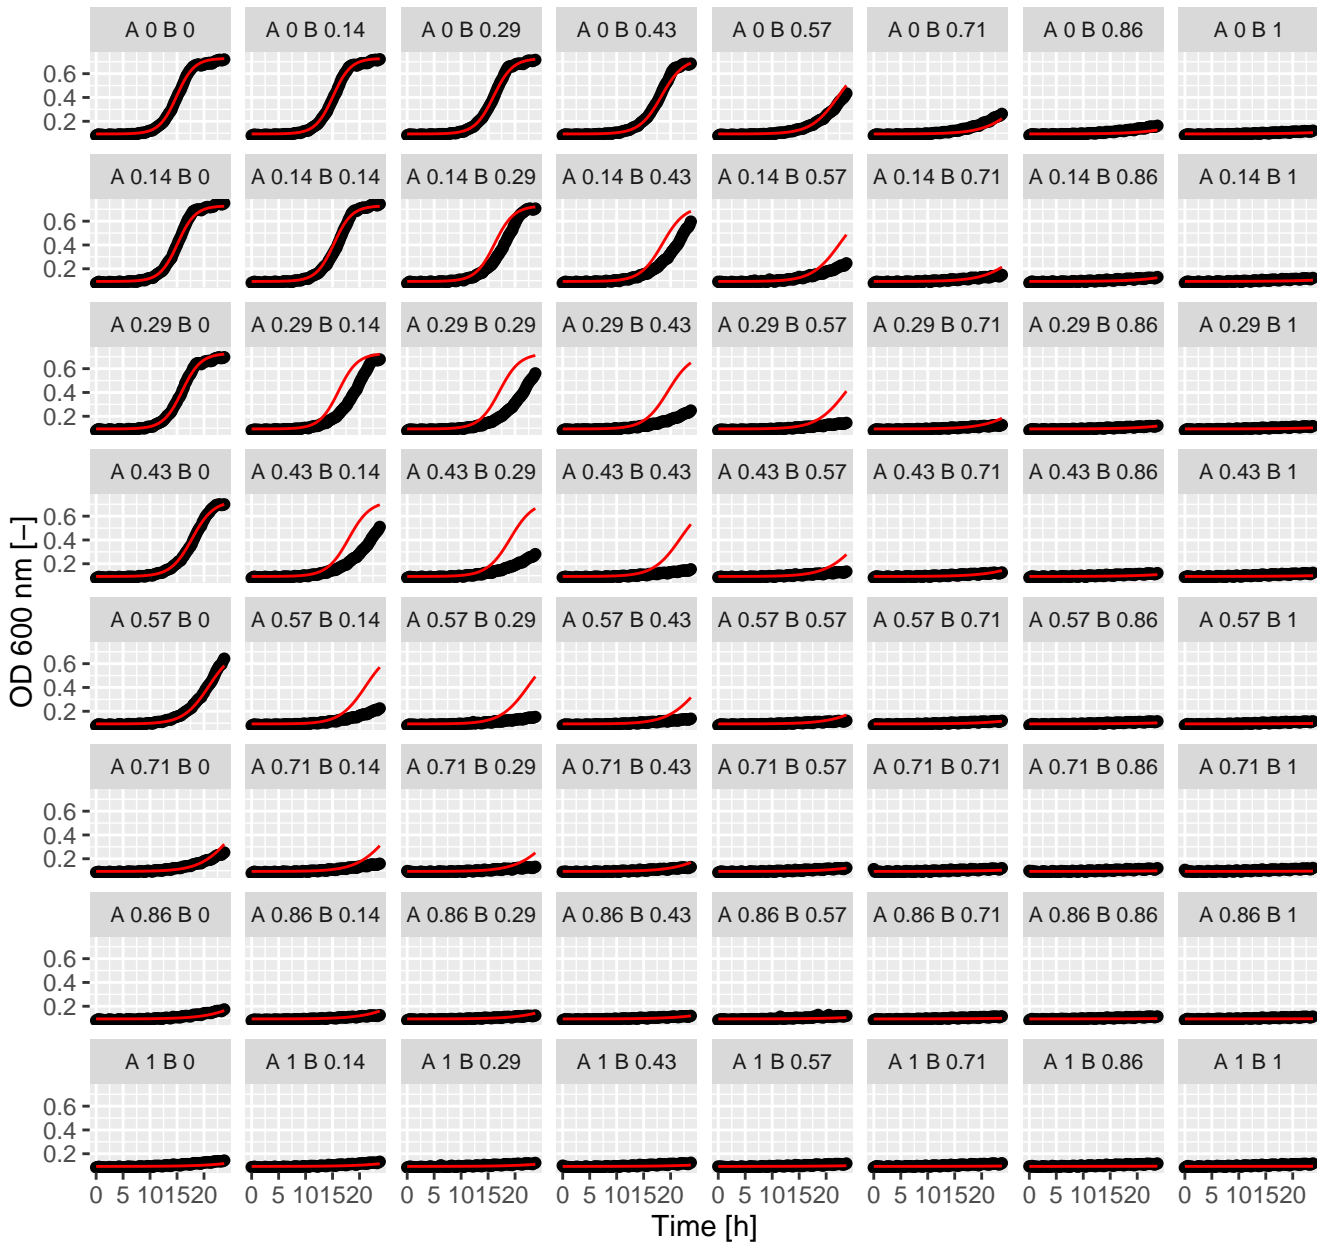

Qmy.Qmy (= Ax.Bx) full GPDI  
Int\_AB = -0.39 and Int\_BA = -0.29 at EC50

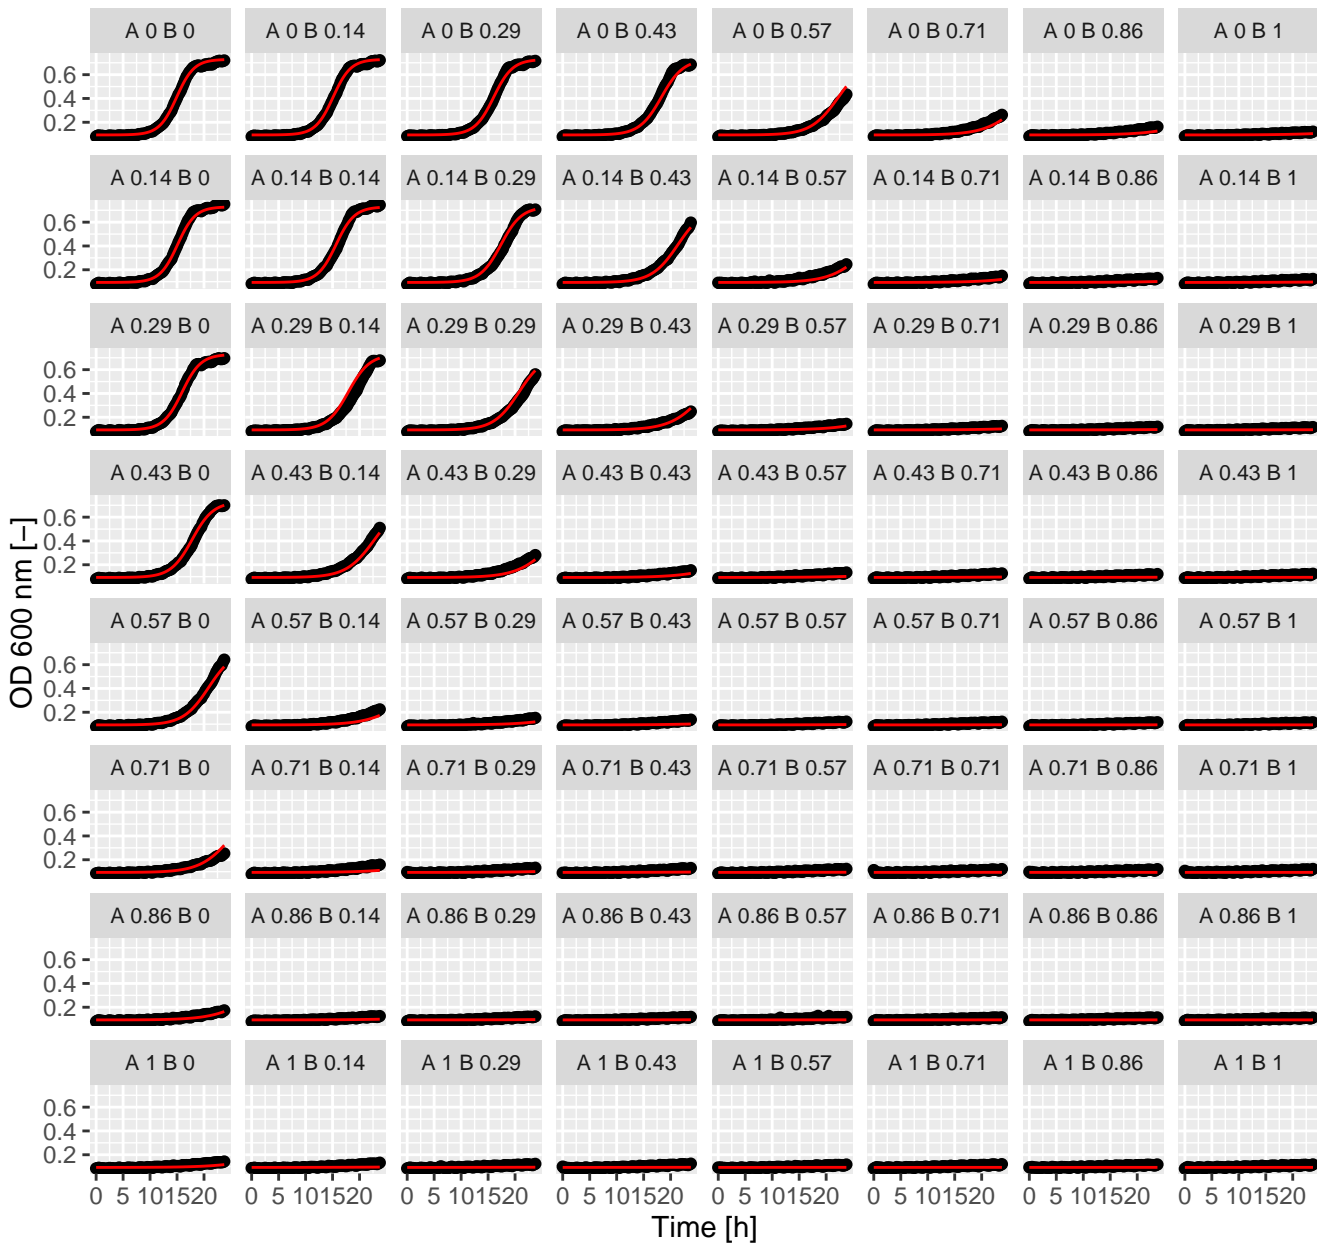

Pen.Tun (= Ax.Bx) exp. additivity (BI)  
Int\_AB = 0 and Int\_BA = 0 at EC50

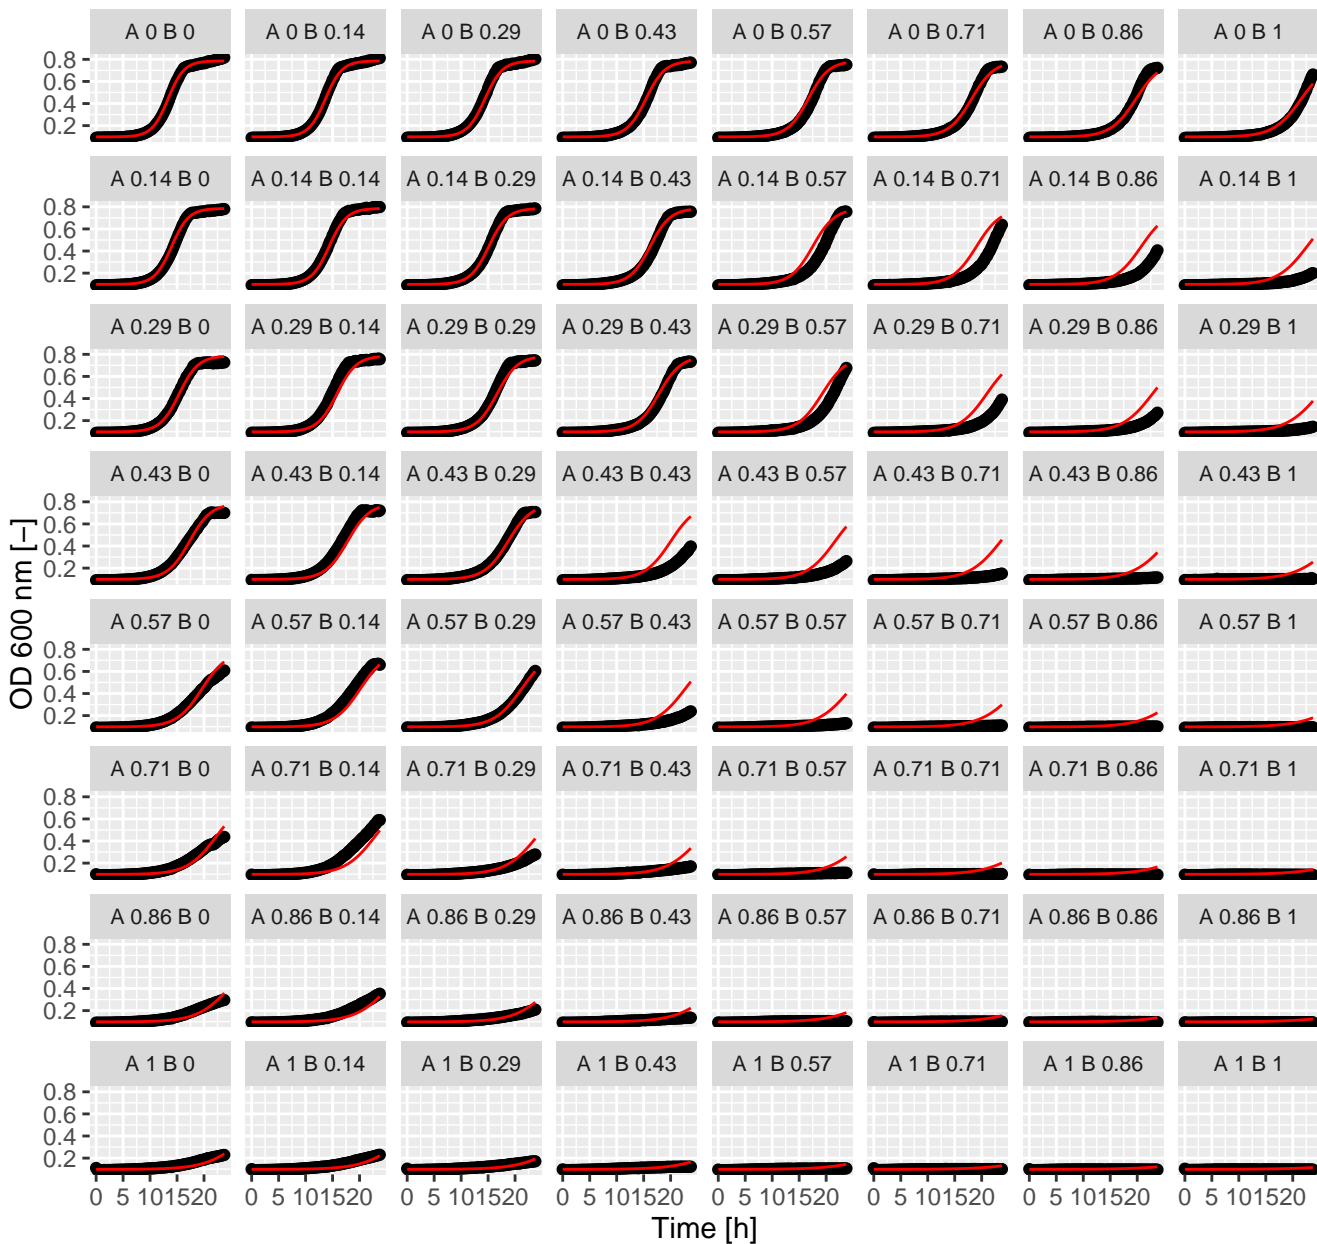

Pen.Tun (= Ax.Bx) full GPDI  
Int\_AB = 0.09 and Int\_BA = -0.37 at EC50

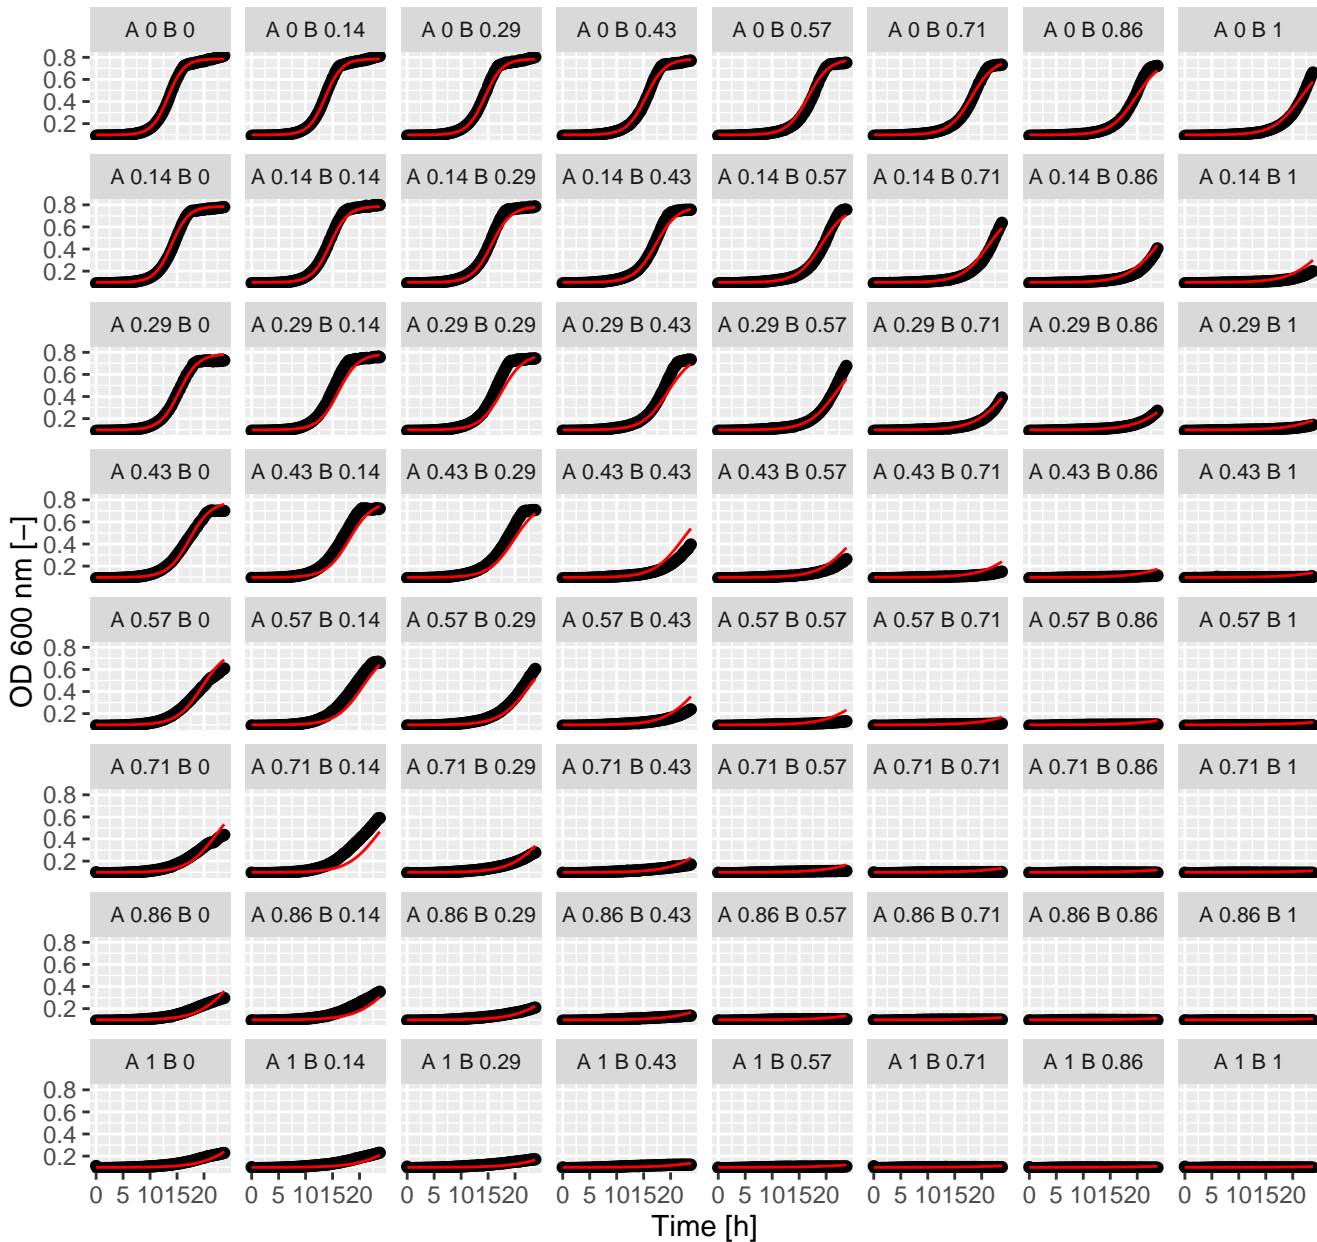

Pen.Ter (= Ax.Bx) exp. additivity (BI)  
Int\_AB = 0 and Int\_BA = 0 at EC50

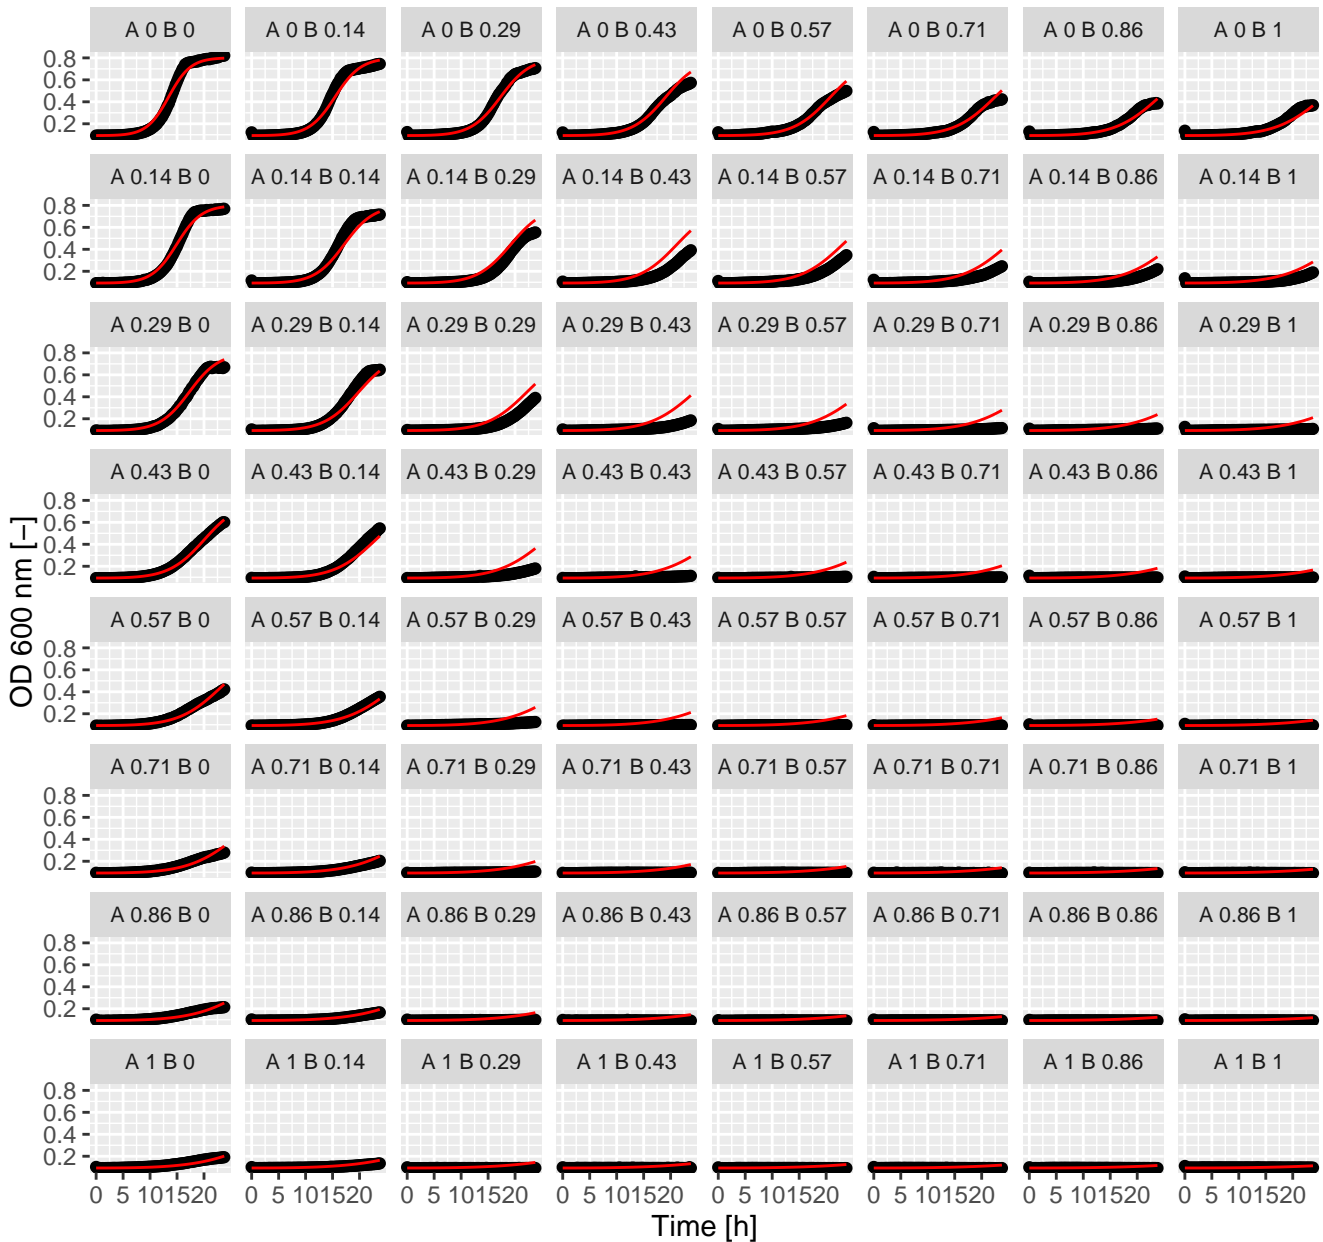

Pen.Ter (= Ax.Bx) full GPDI  
 Int\_AB = -0.65 and Int\_BA = 0.47 at EC50

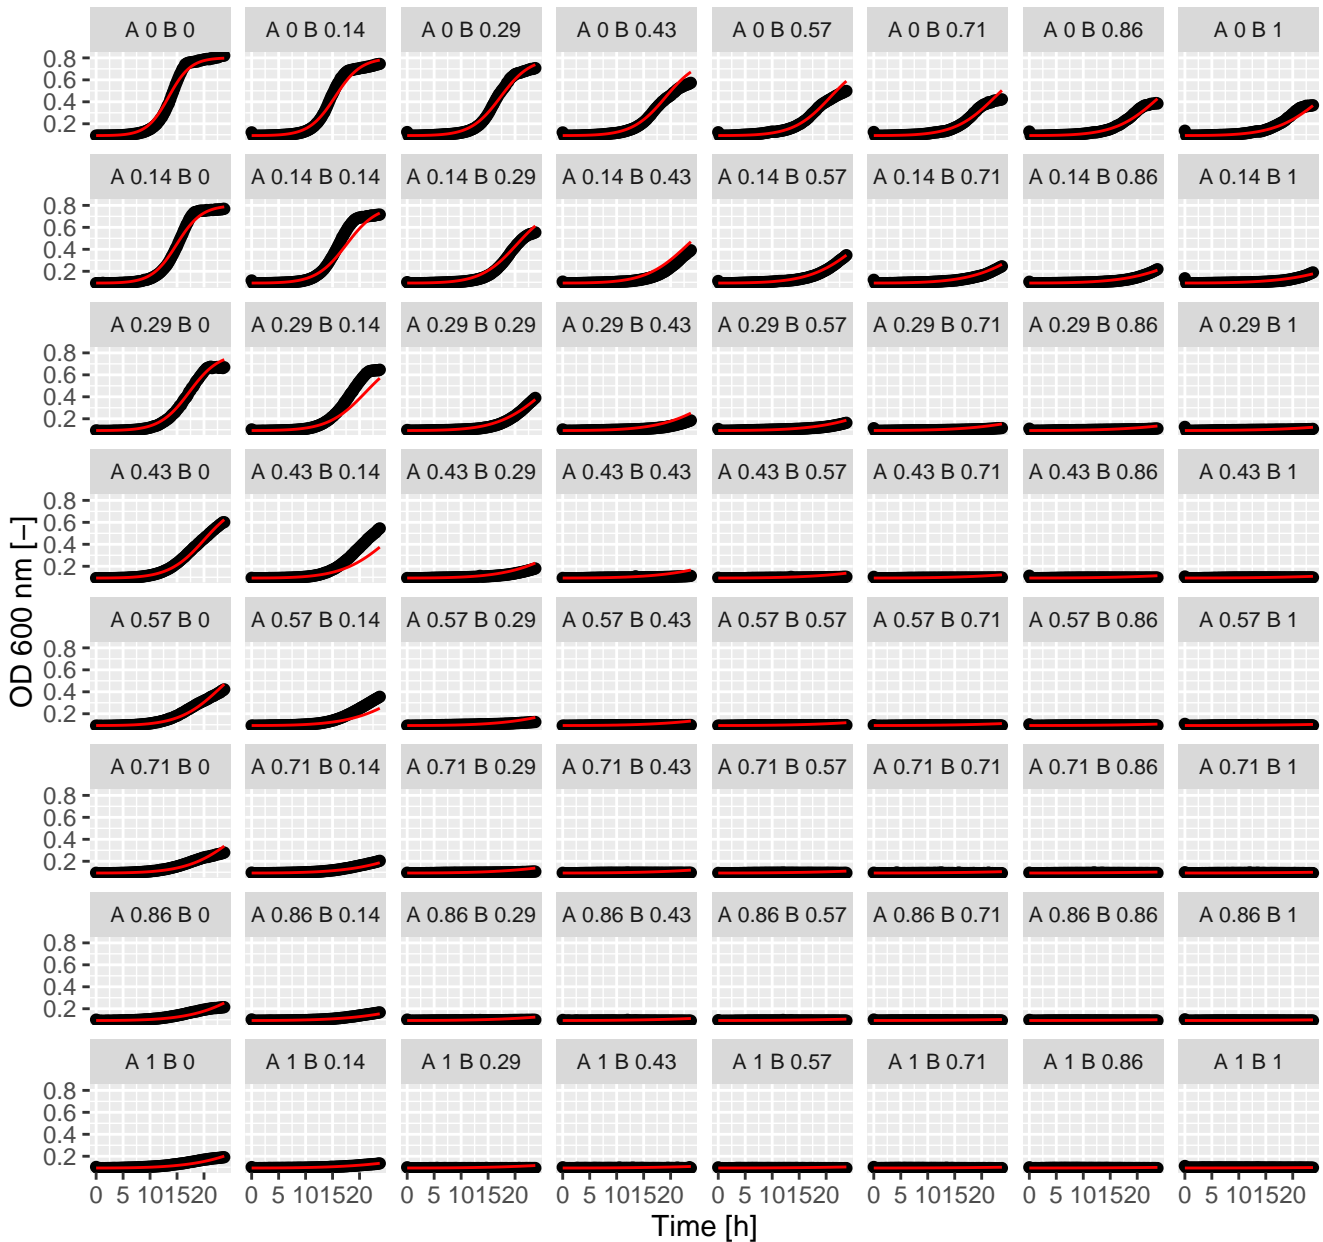



Pen.Tac (= Ax.Bx) exp. additivity (BI)  
Int\_AB = 0 and Int\_BA = 0 at EC50

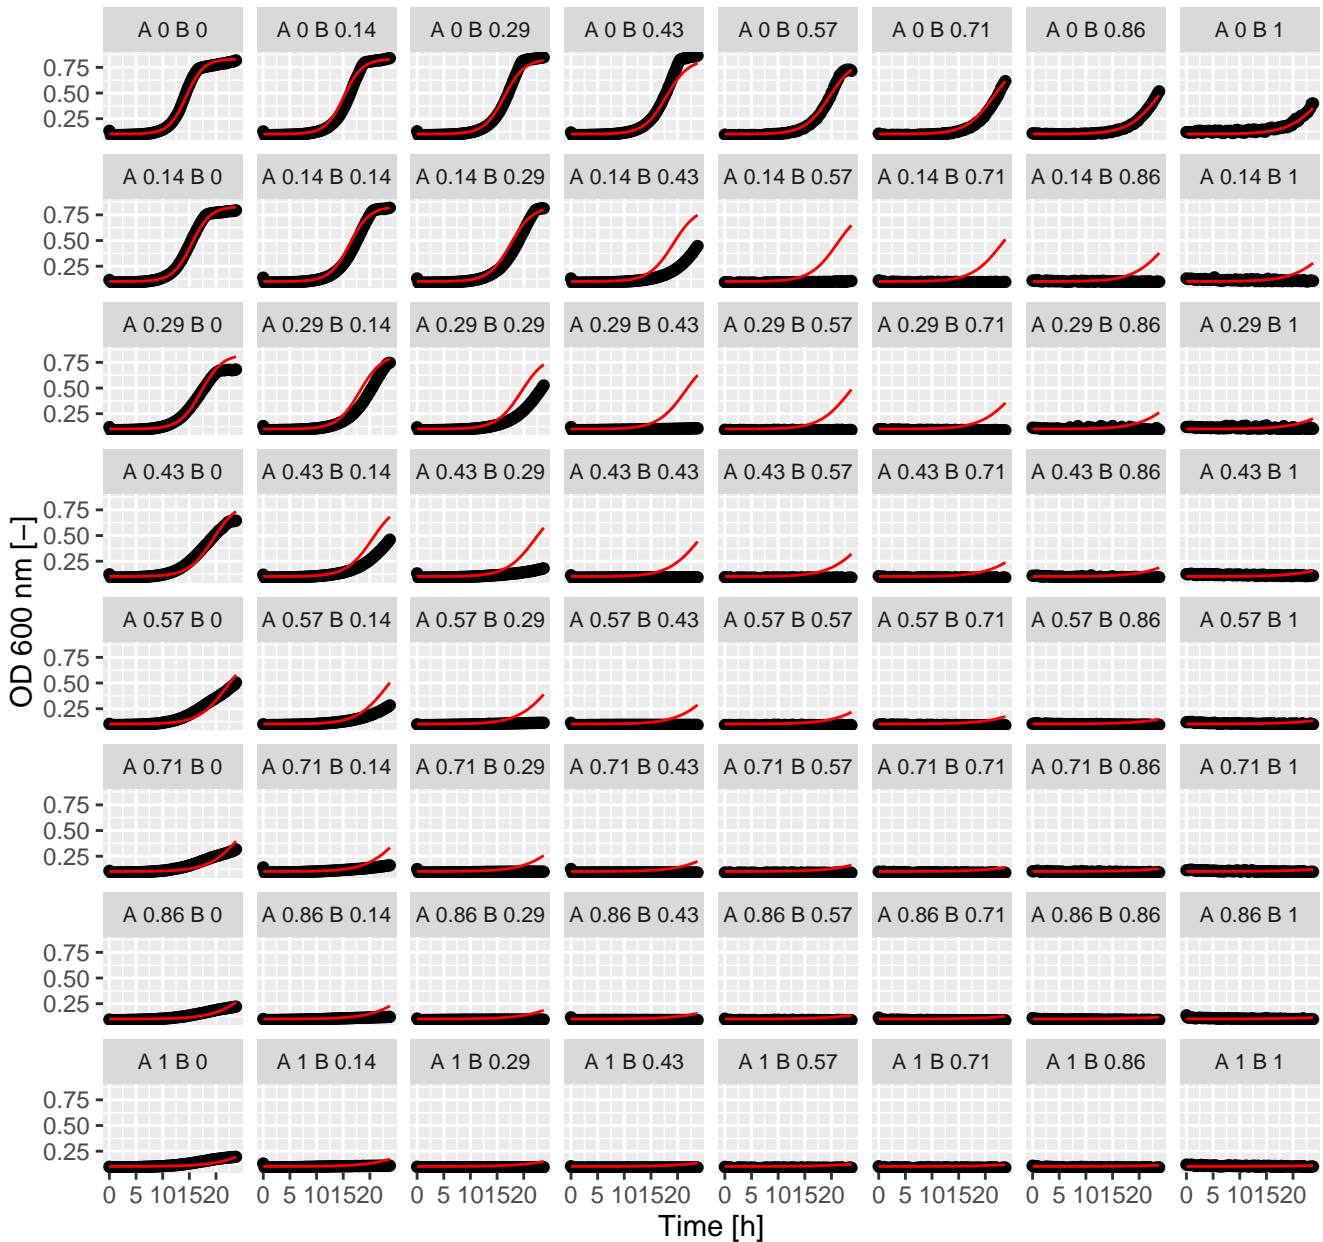

Pen.Tac (= Ax.Bx) full GPD1  
Int\_AB = -0.71 and Int\_BA = -0.24 at EC50

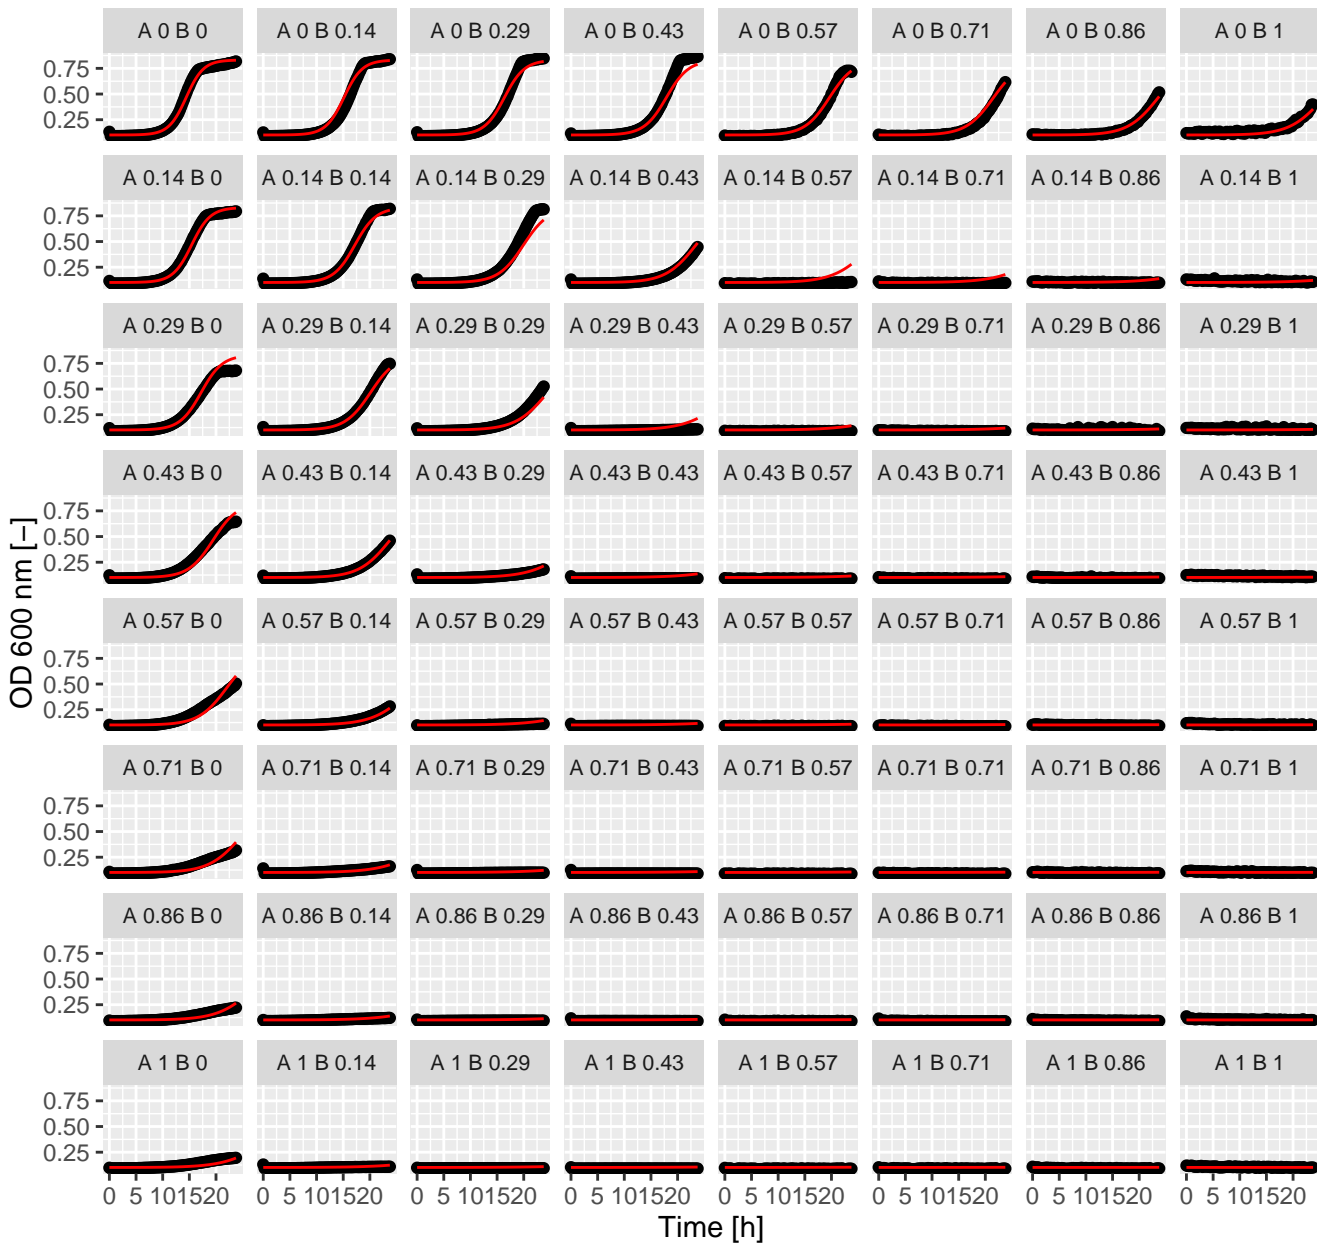

Pen.Sta (= Ax.Bx) exp. additivity (BI)  
Int\_AB = 0 and Int\_BA = 0 at EC50

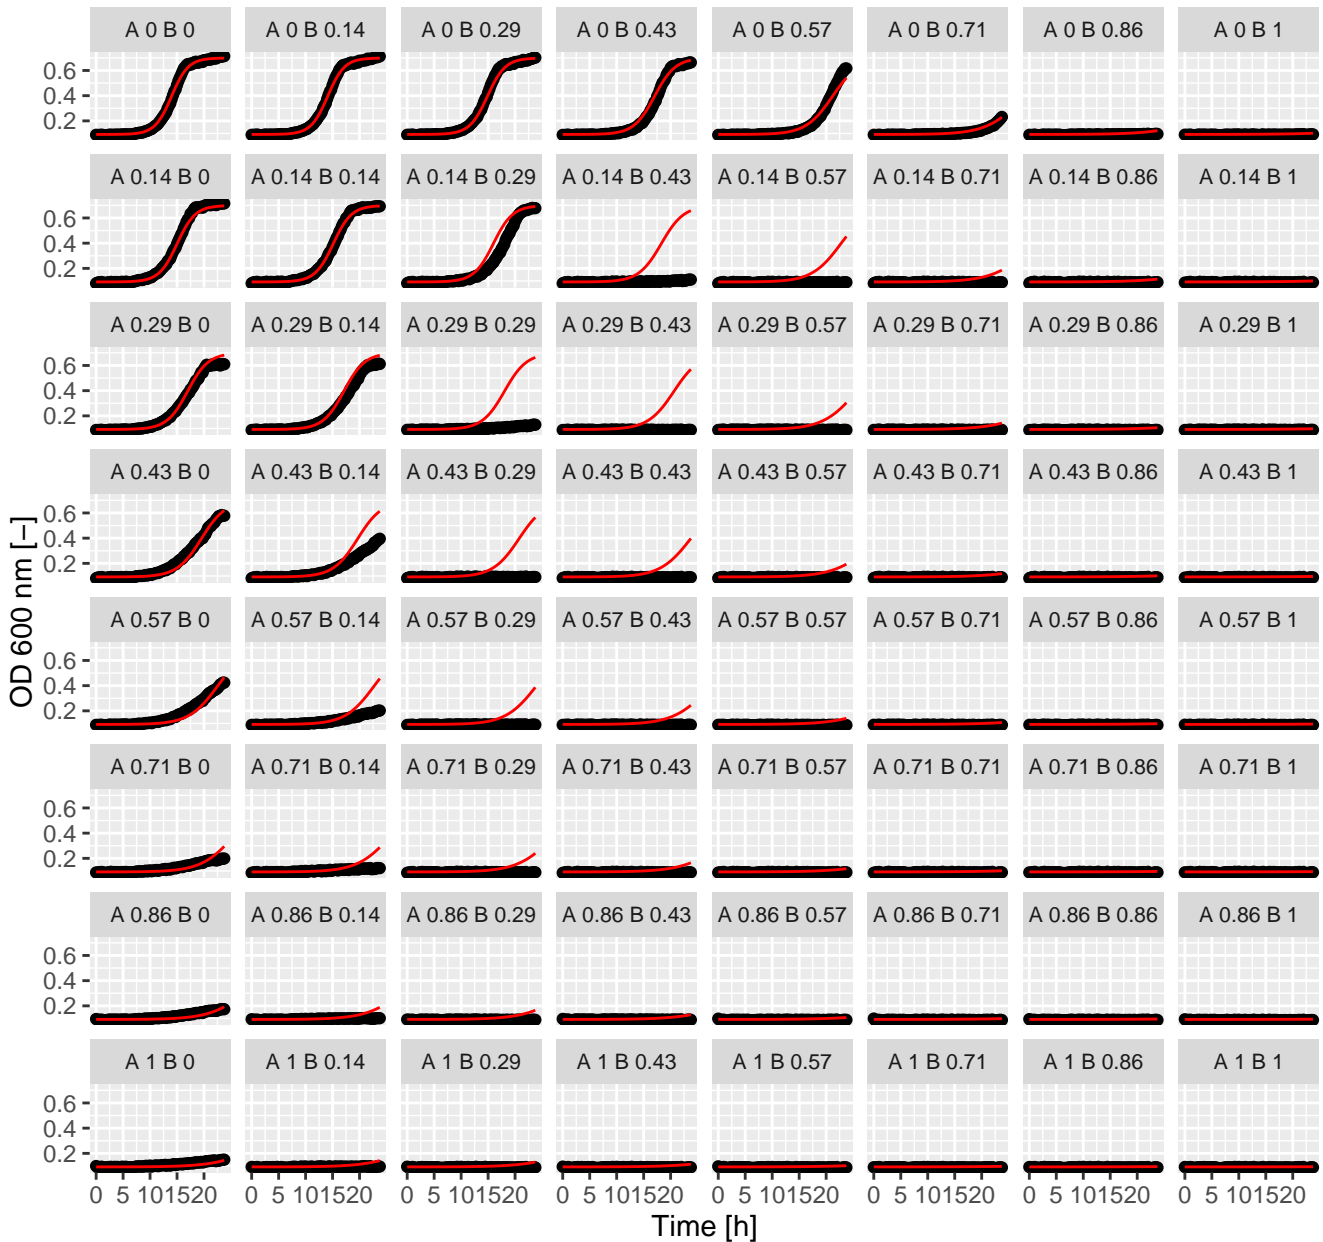

Pen.Sta (= Ax.Bx) full GPDI  
Int\_AB = 0.58 and Int\_BA = -0.76 at EC50

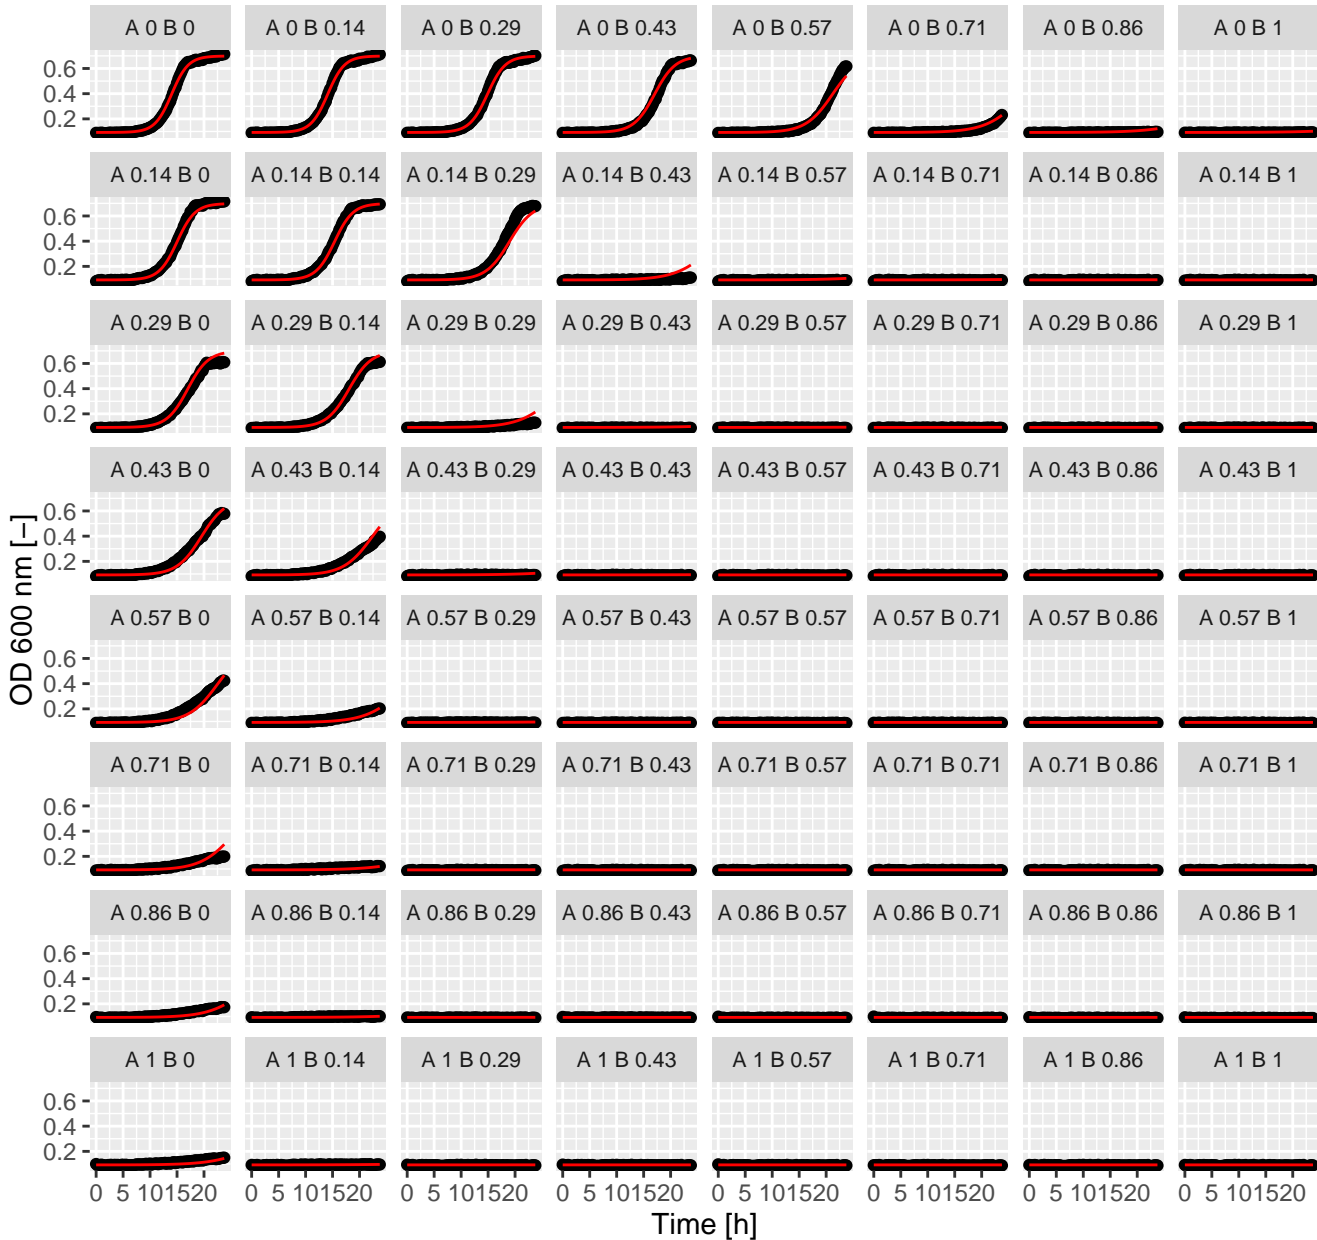

Pen.Rap (= Ax.Bx) exp. additivity (BI)  
Int\_AB = 0 and Int\_BA = 0 at EC50

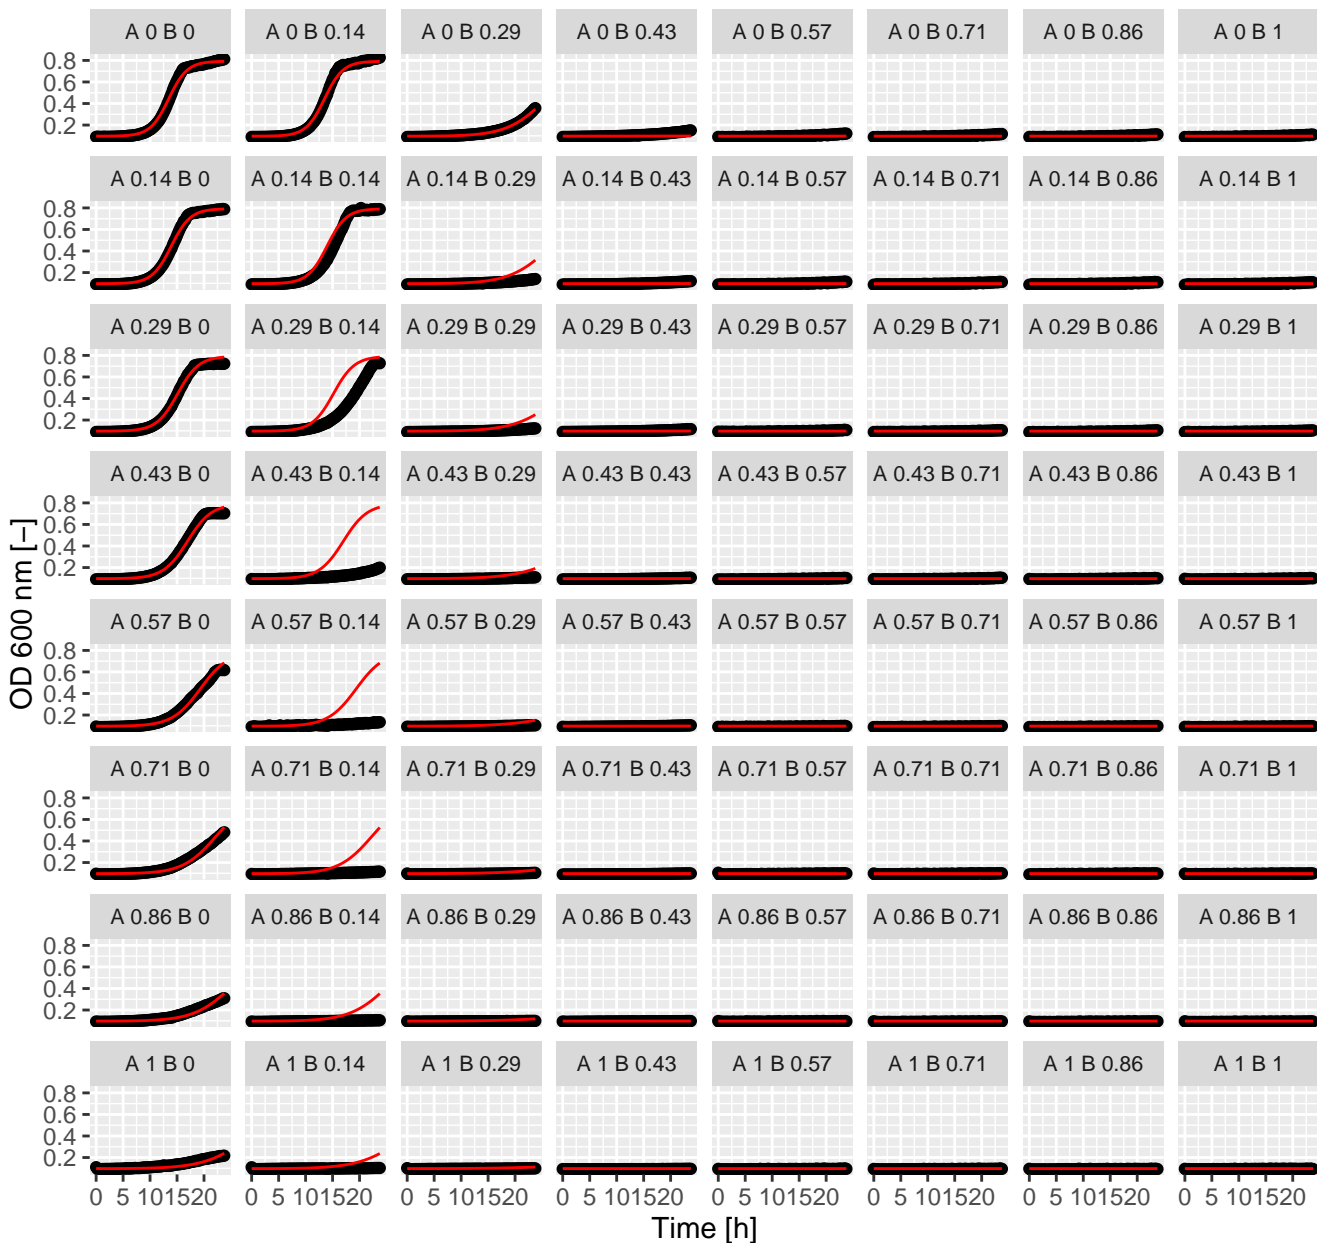

Pen.Rap (= Ax.Bx) full GPDl  
Int\_AB = -0.48 and Int\_BA = -0.62 at EC50

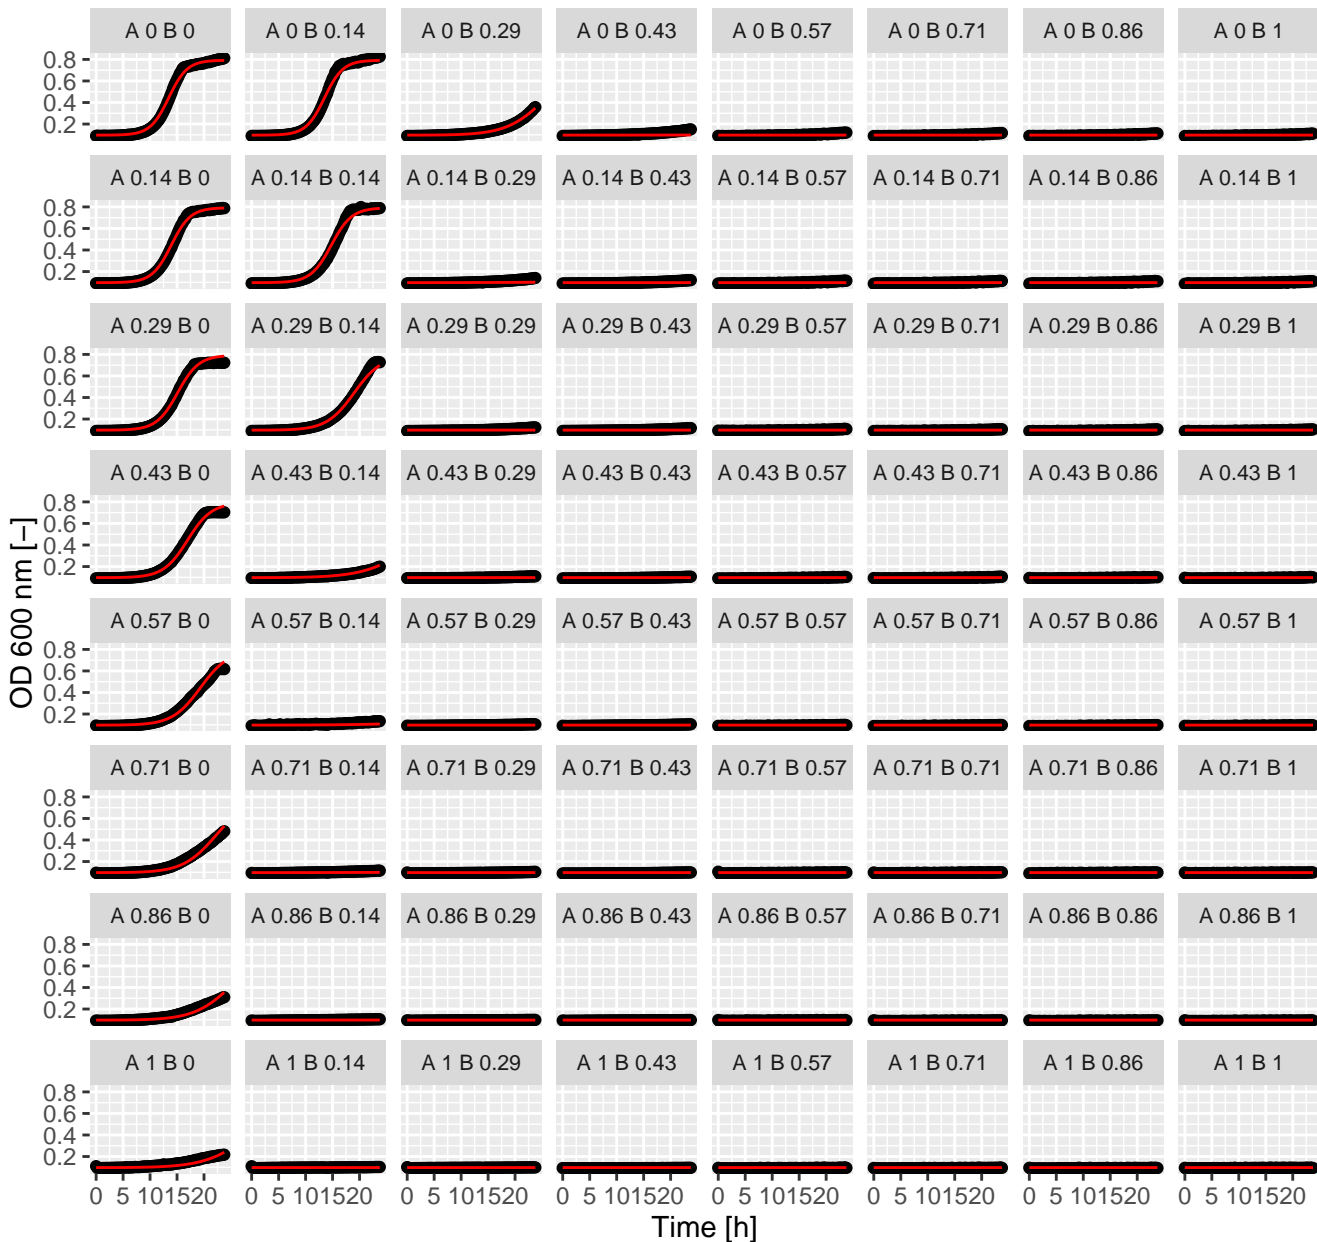

Pen.Rad (= Ax.Bx) exp. additivity (BI)  
Int\_AB = 0 and Int\_BA = 0 at EC50

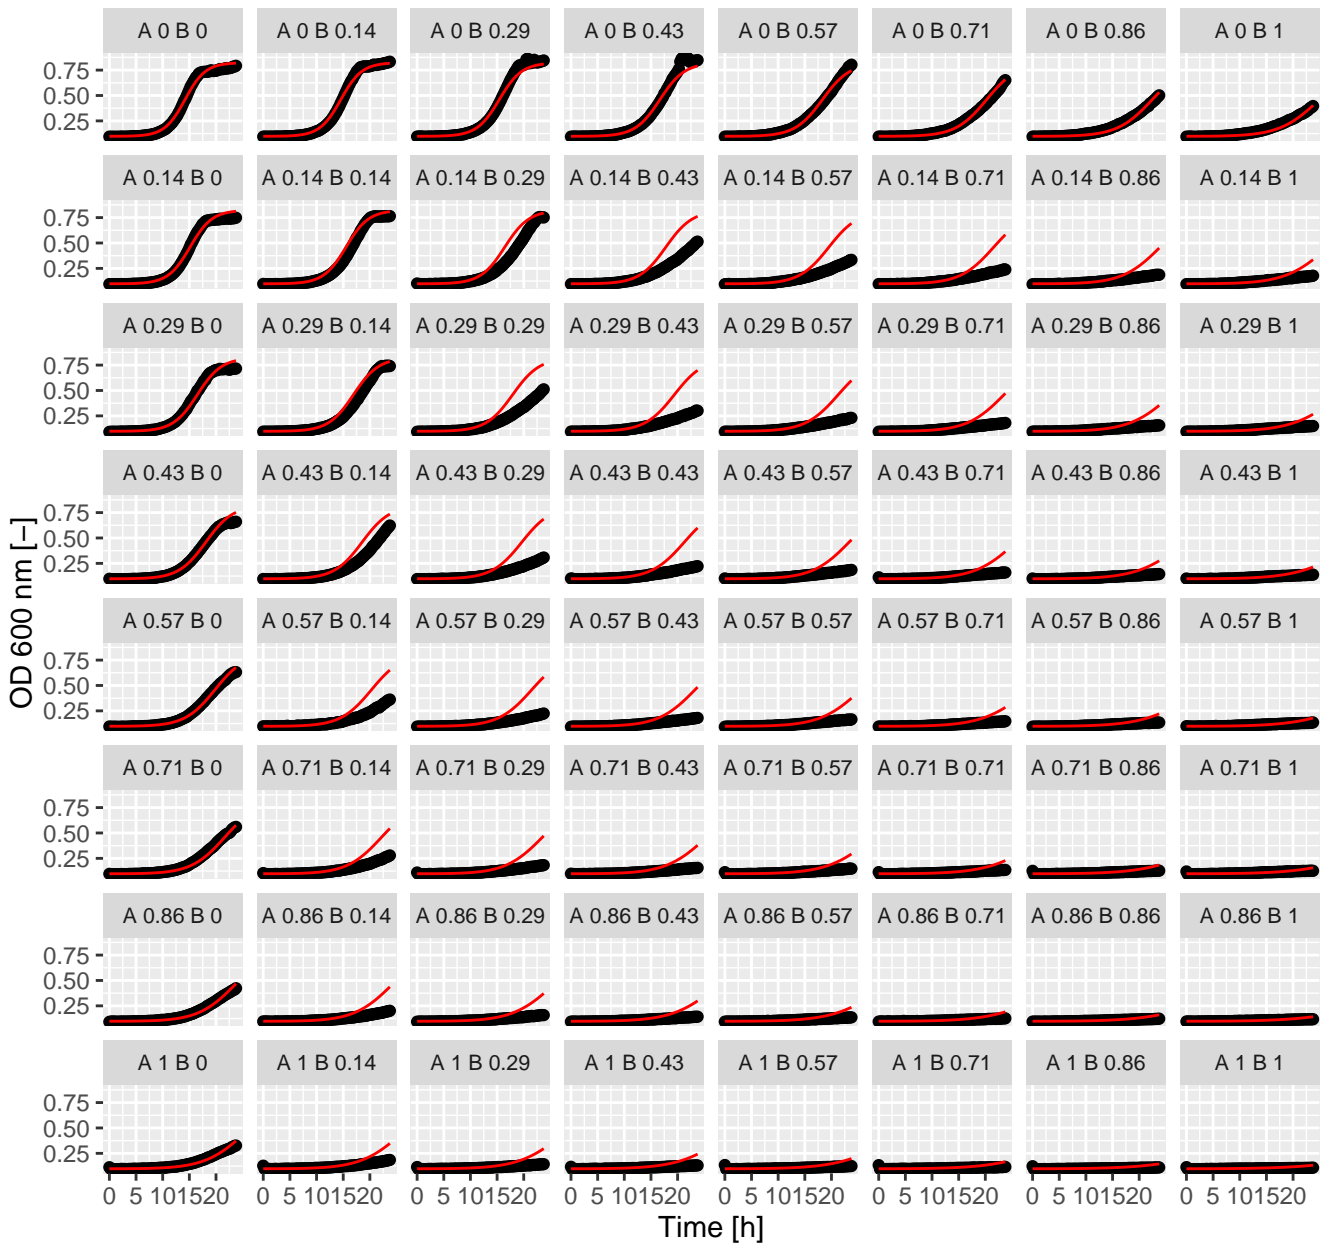

Pen.Rad (= Ax.Bx) full GPDI  
Int\_AB = -0.49 and Int\_BA = -0.31 at EC50

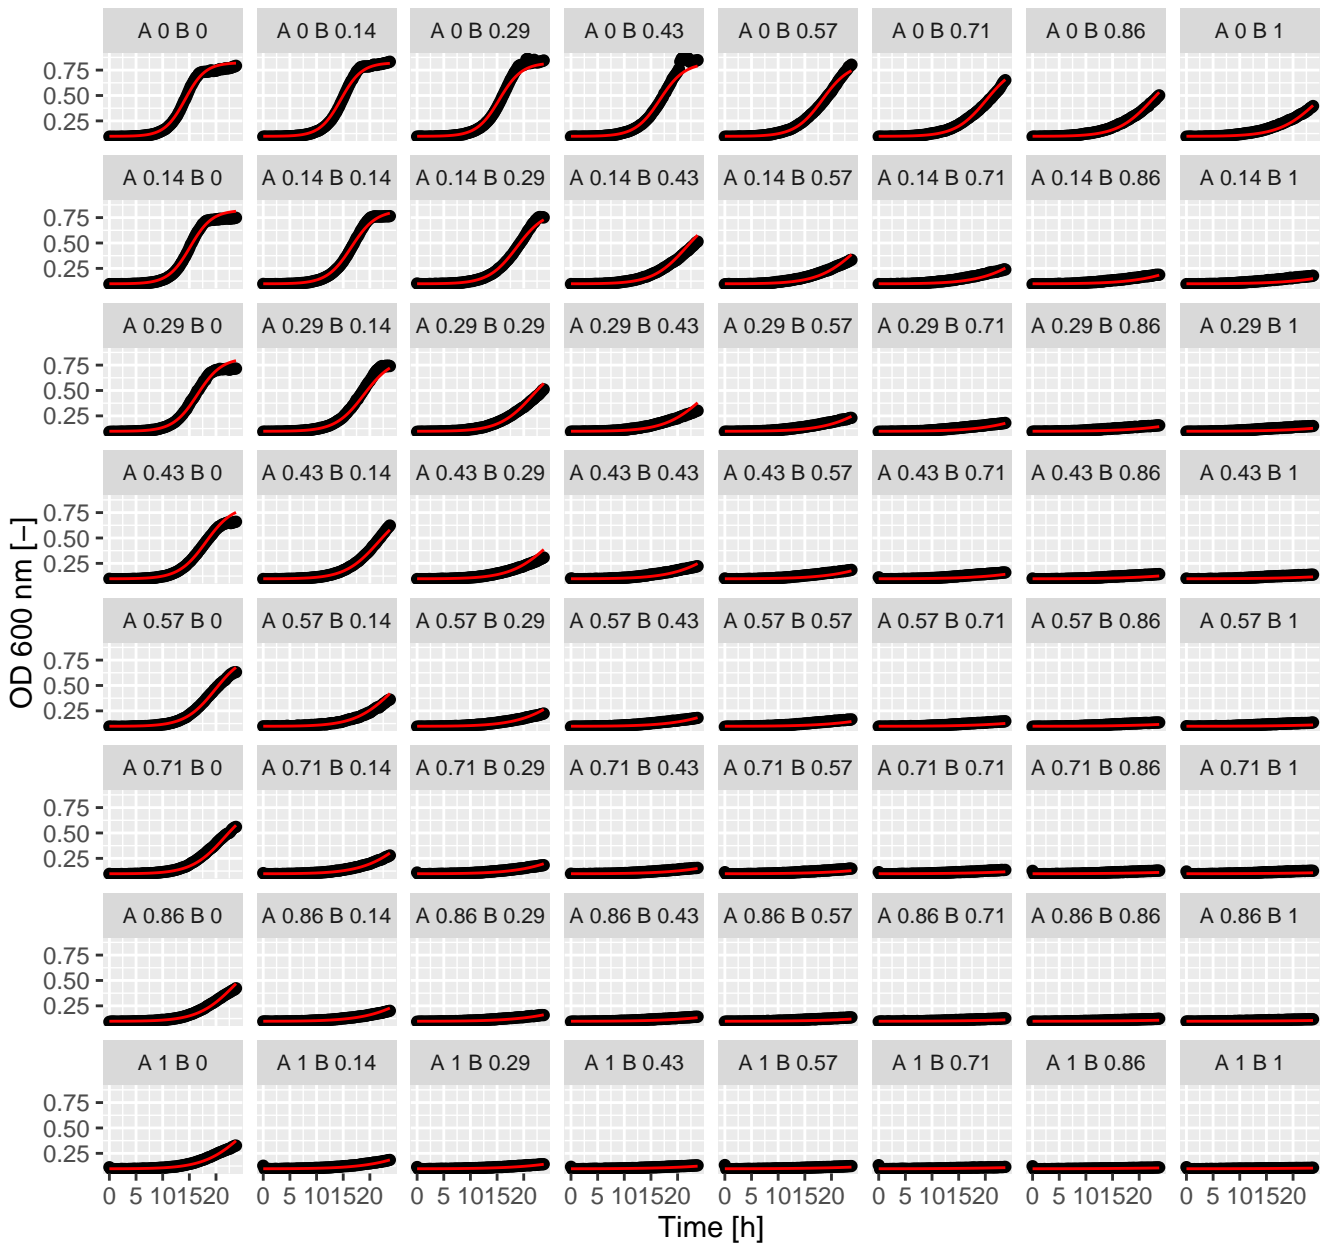



Pen.Qmy (= Ax.Bx) exp. additivity (BI)  
Int\_AB = 0 and Int\_BA = 0 at EC50

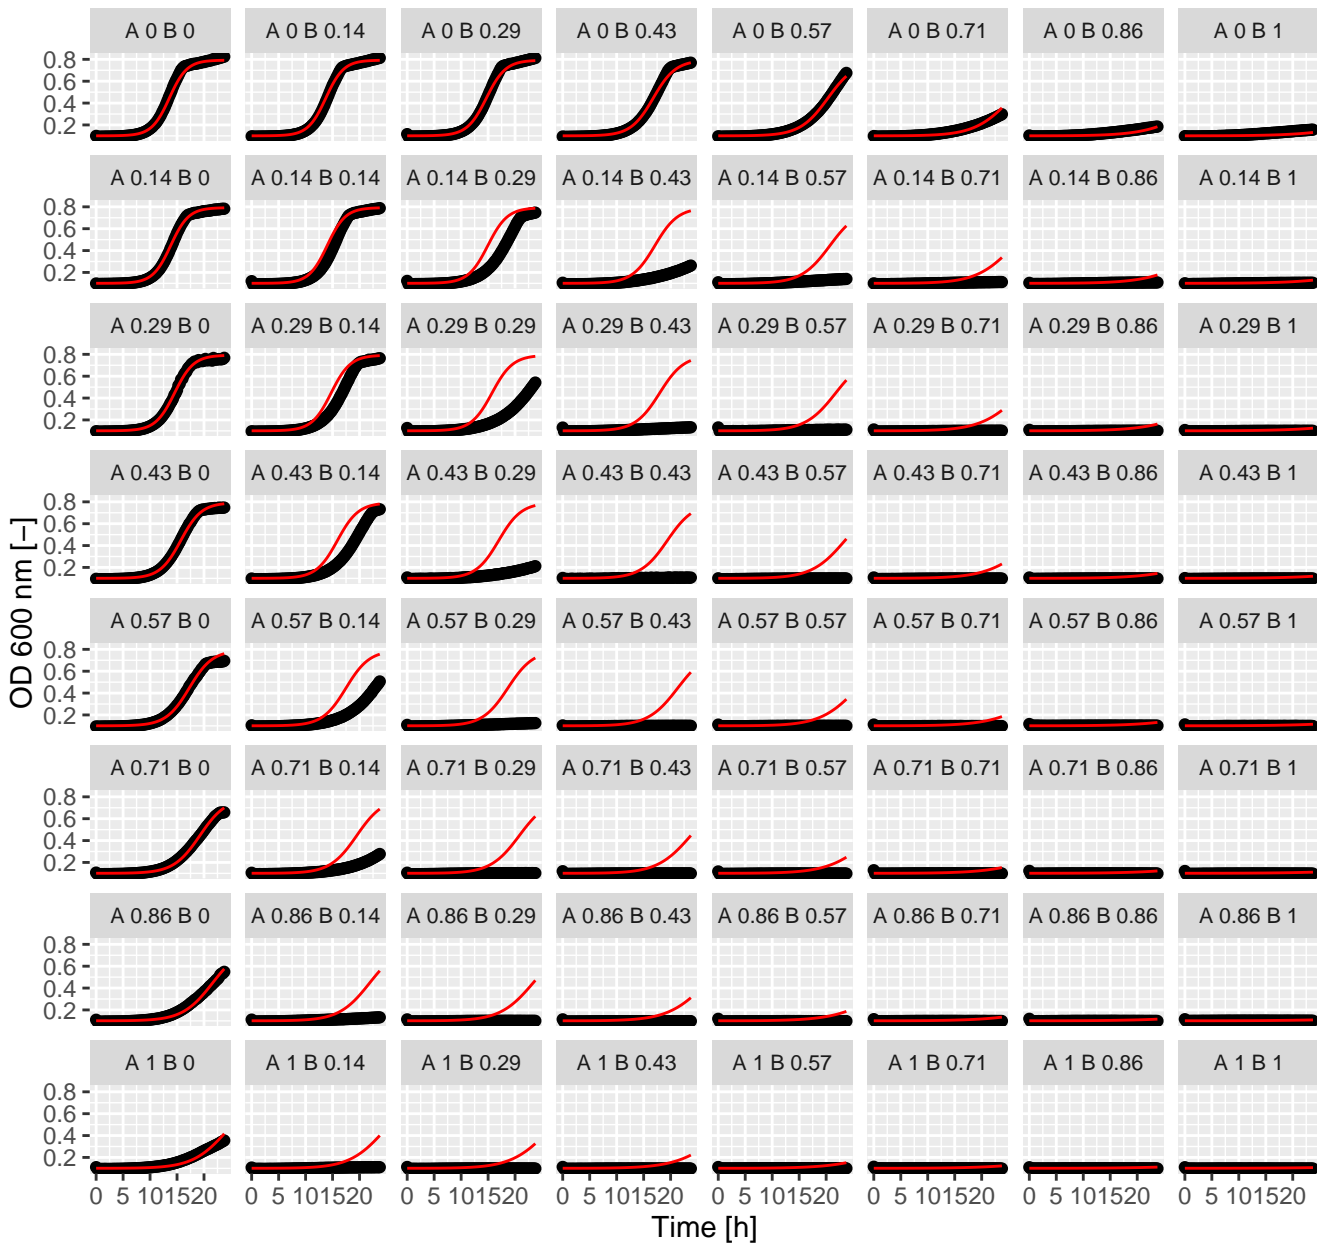

Pen.Qmy (= Ax.Bx) full GPDI  
Int\_AB = -0.72 and Int\_BA = -0.41 at EC50

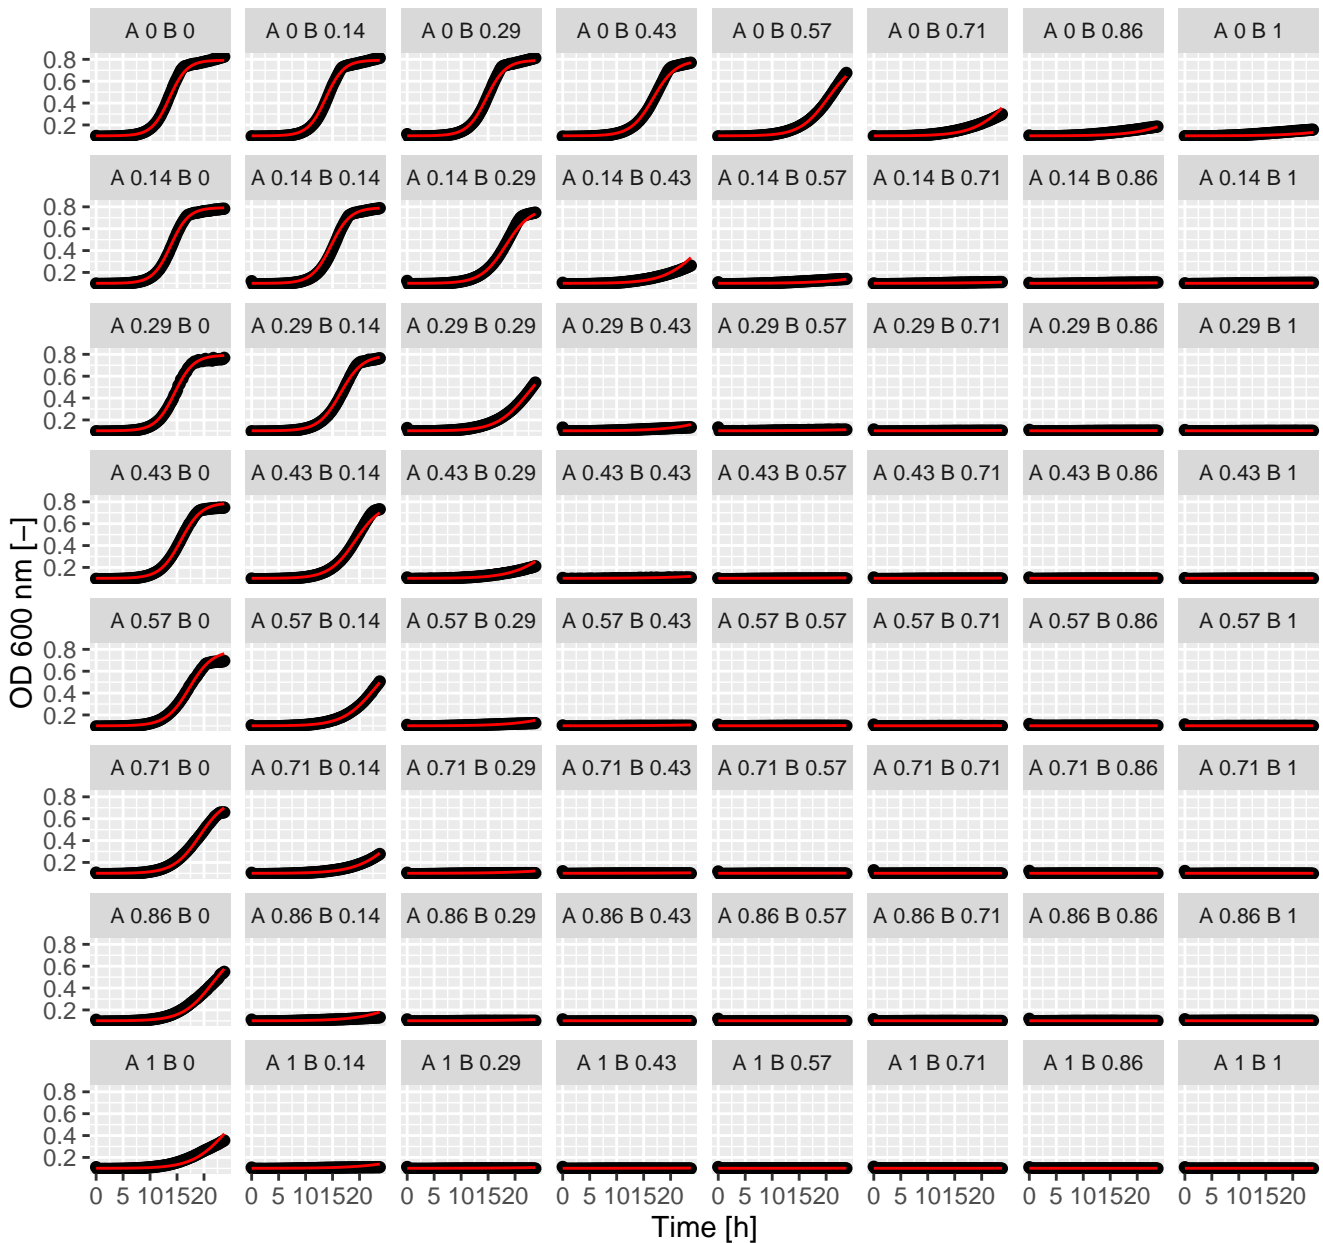

Myr.Ter (= Ax.Bx) exp. additivity (BI)  
Int\_AB = 0 and Int\_BA = 0 at EC50

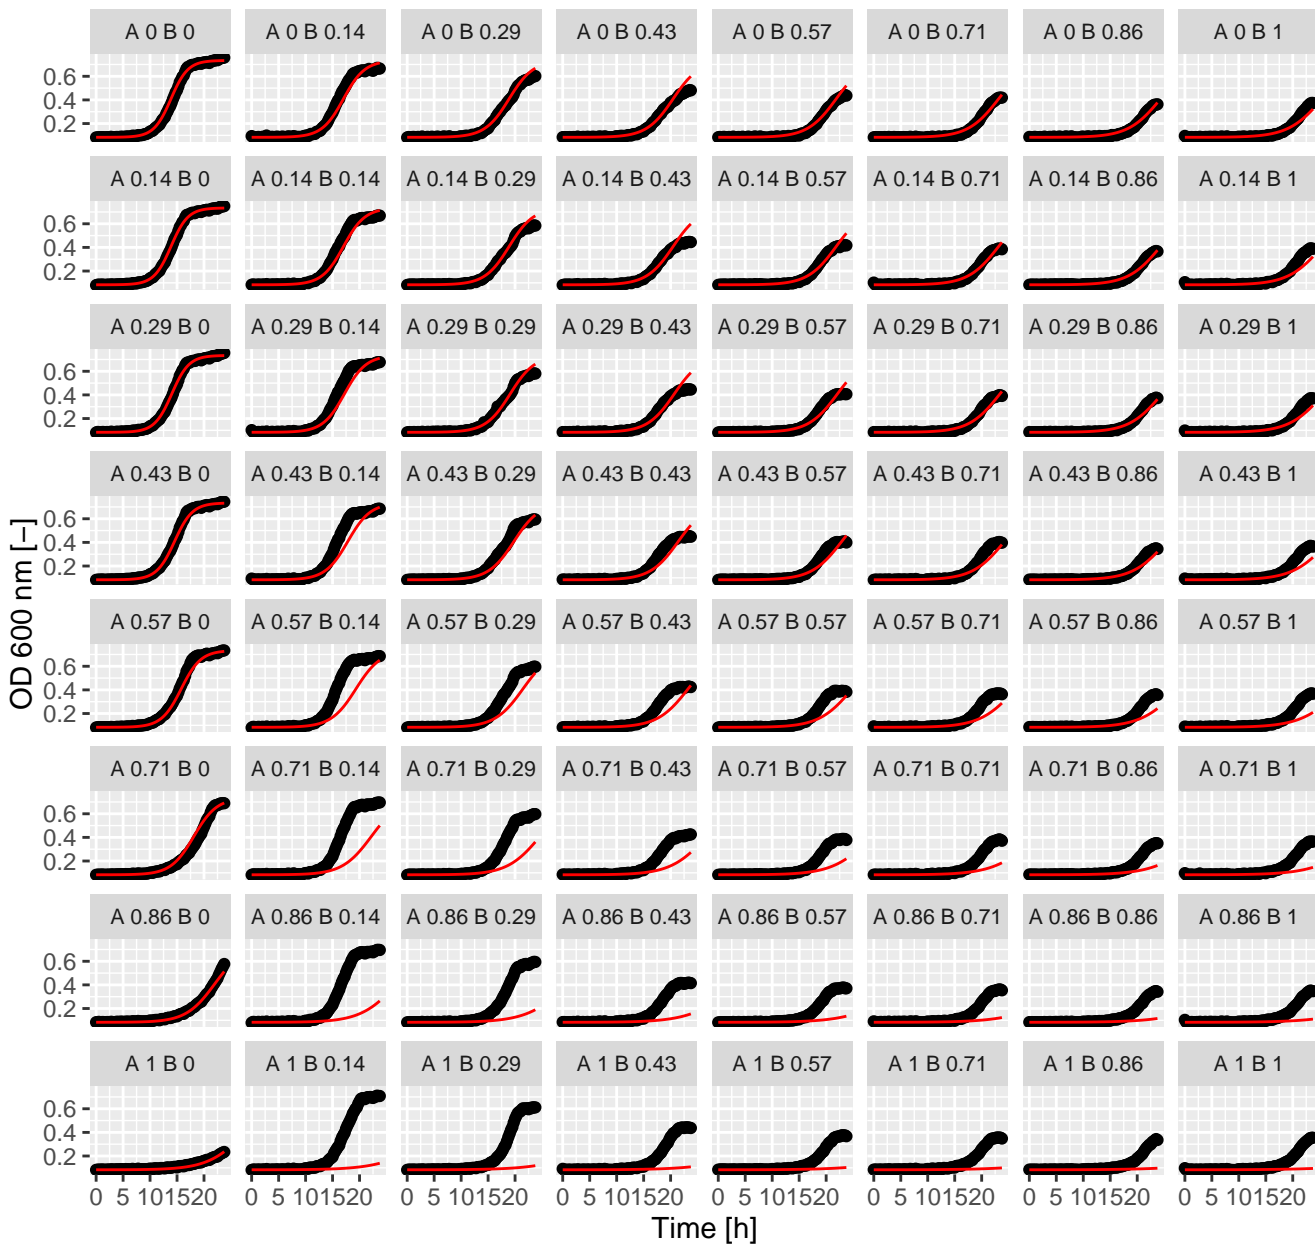

Myr.Ter (= Ax.Bx) full GPDI  
 Int\_AB = 1.57 and Int\_BA = 0.04 at EC50

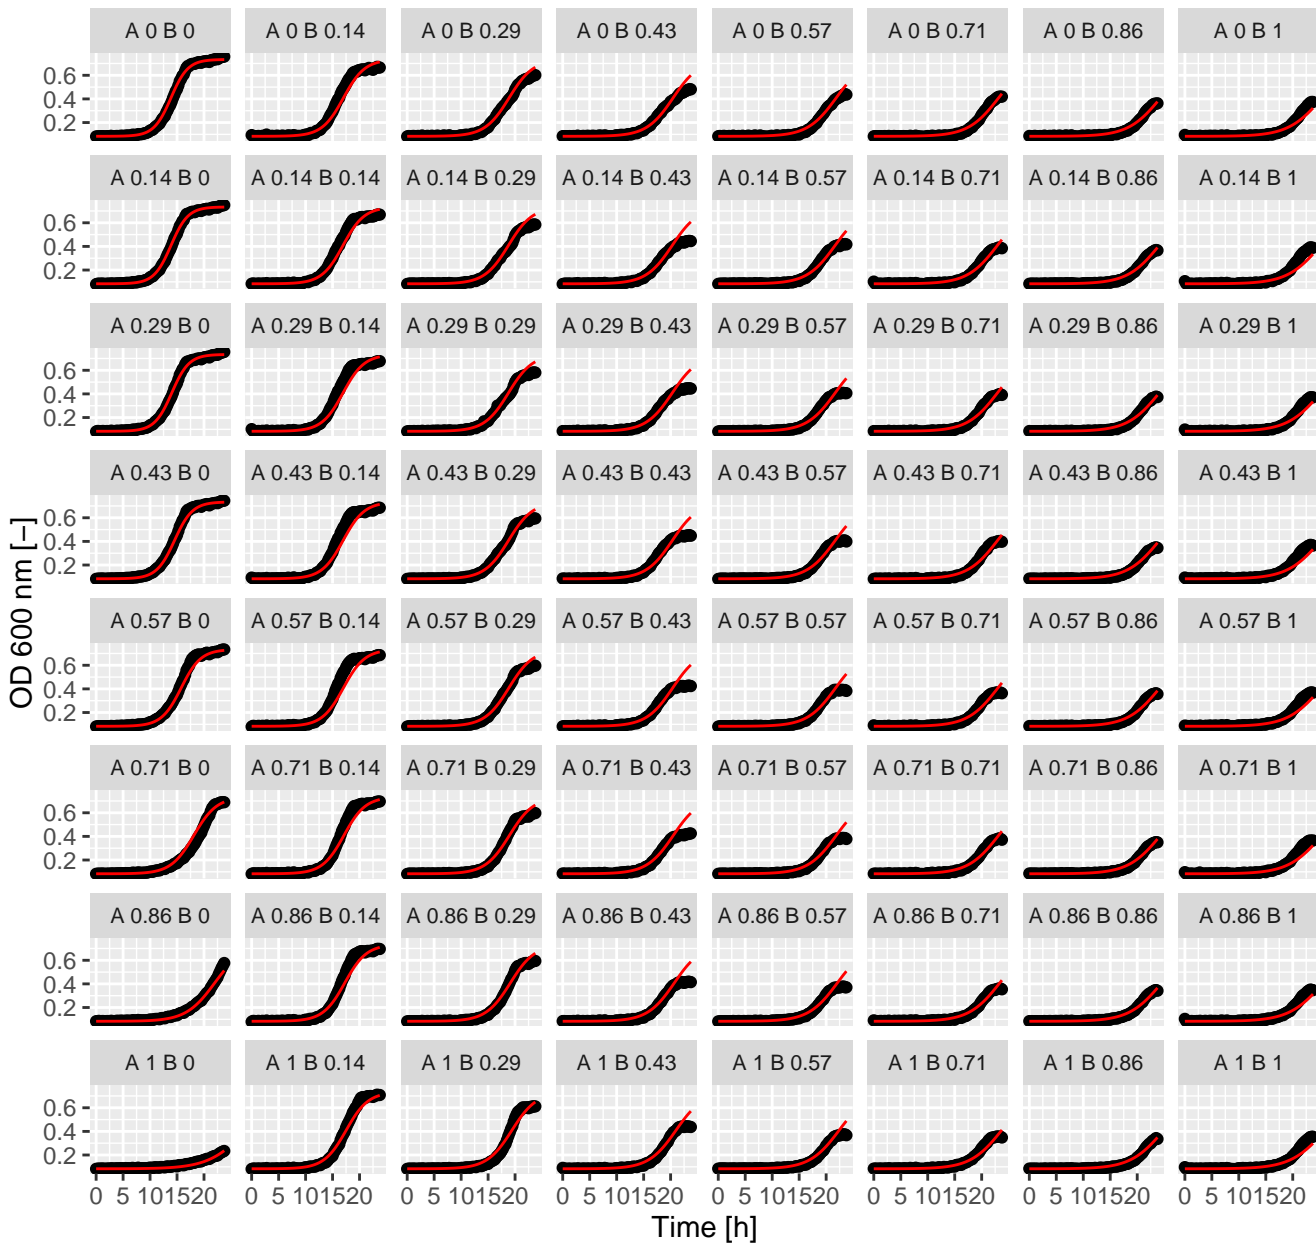

Myr.Tac (= Ax.Bx) exp. additivity (BI)  
Int\_AB = 0 and Int\_BA = 0 at EC50

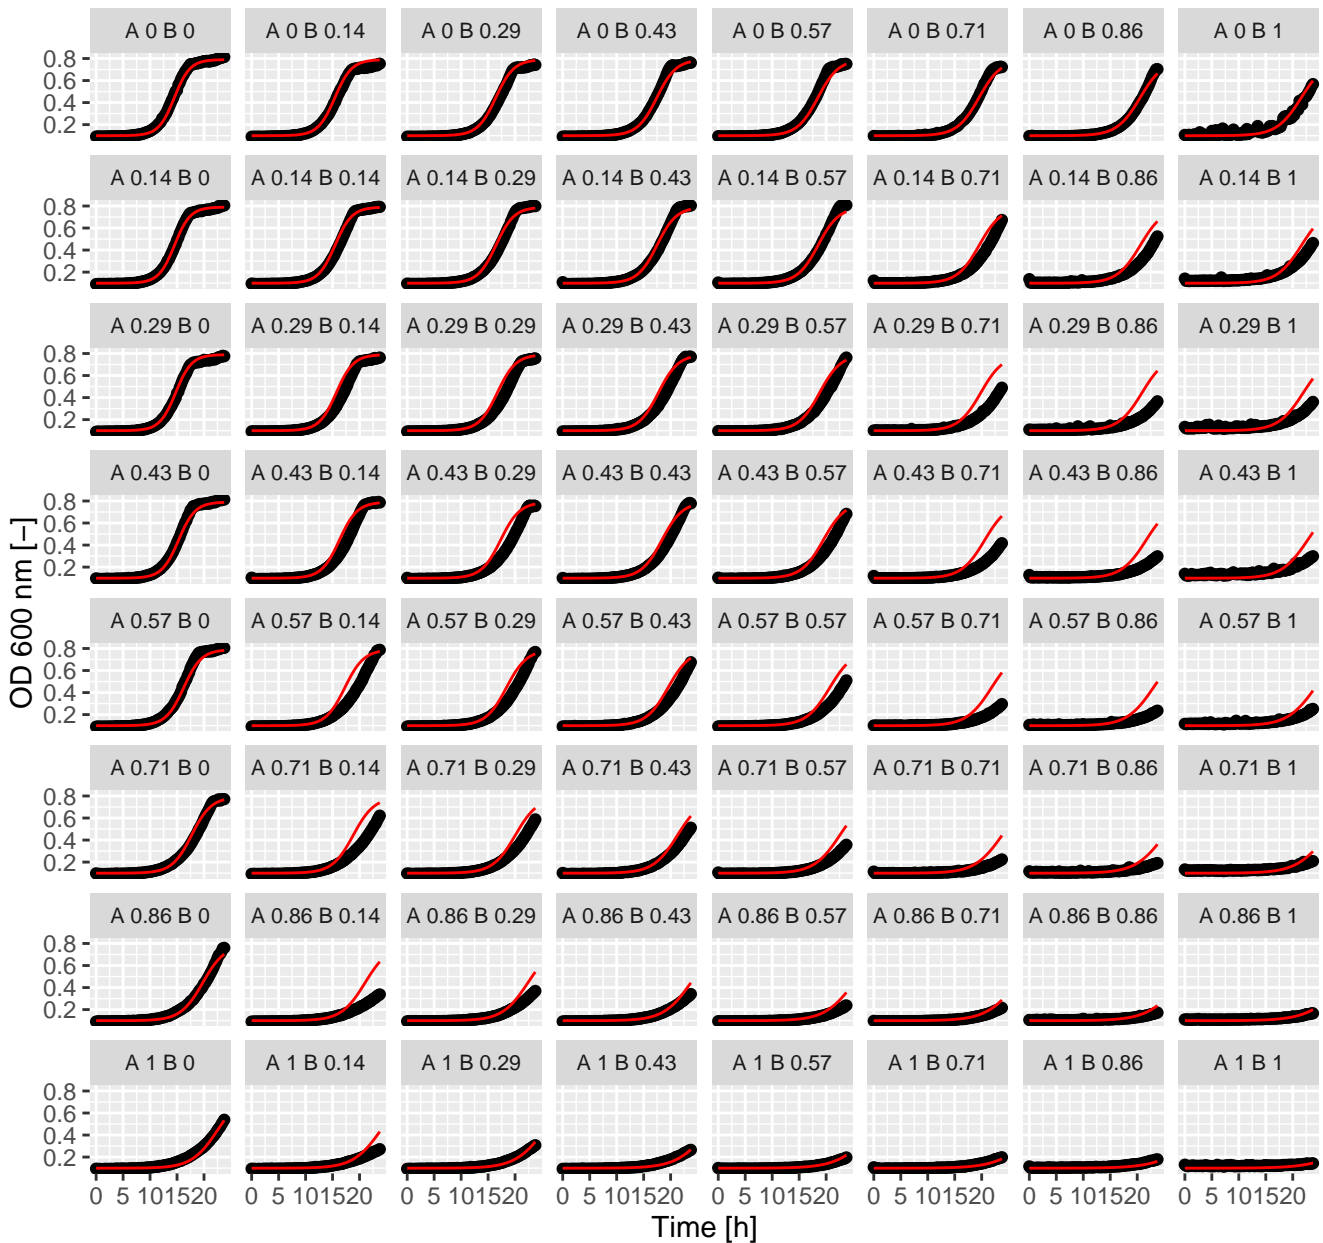

Myr.Tac (= Ax.Bx) full GPDI  
Int\_AB = -0.08 and Int\_BA = -0.29 at EC50

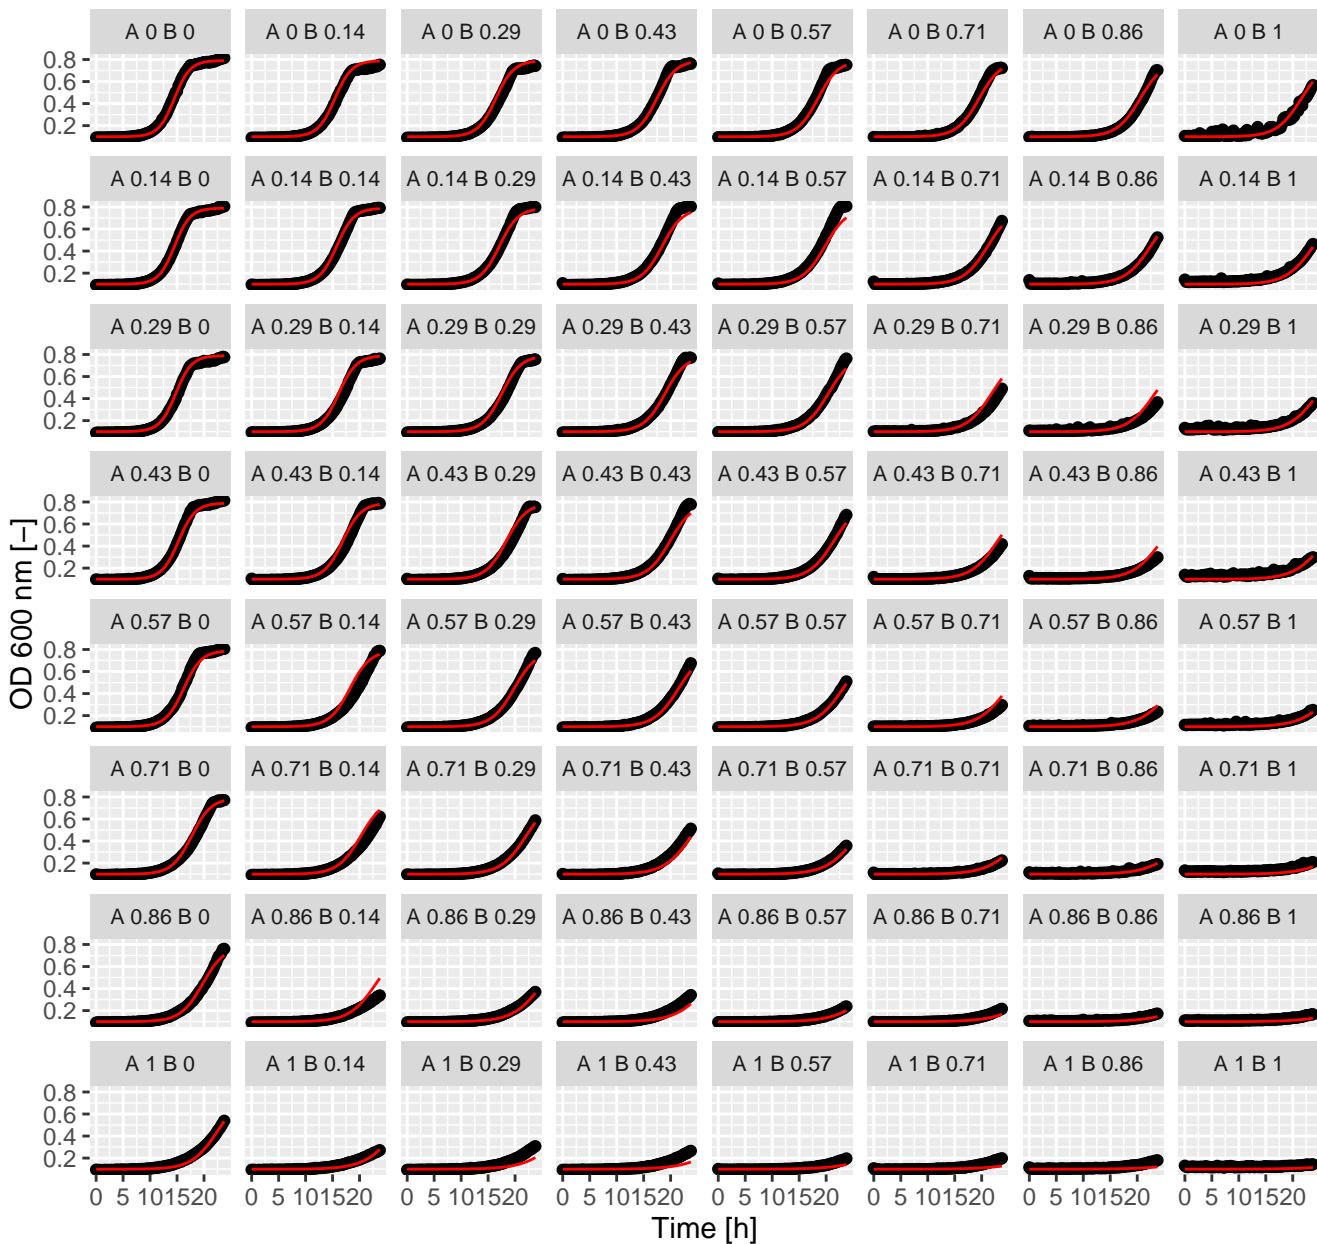

Myr.Sta (= Ax.Bx) exp. additivity (BI)  
Int\_AB = 0 and Int\_BA = 0 at EC50

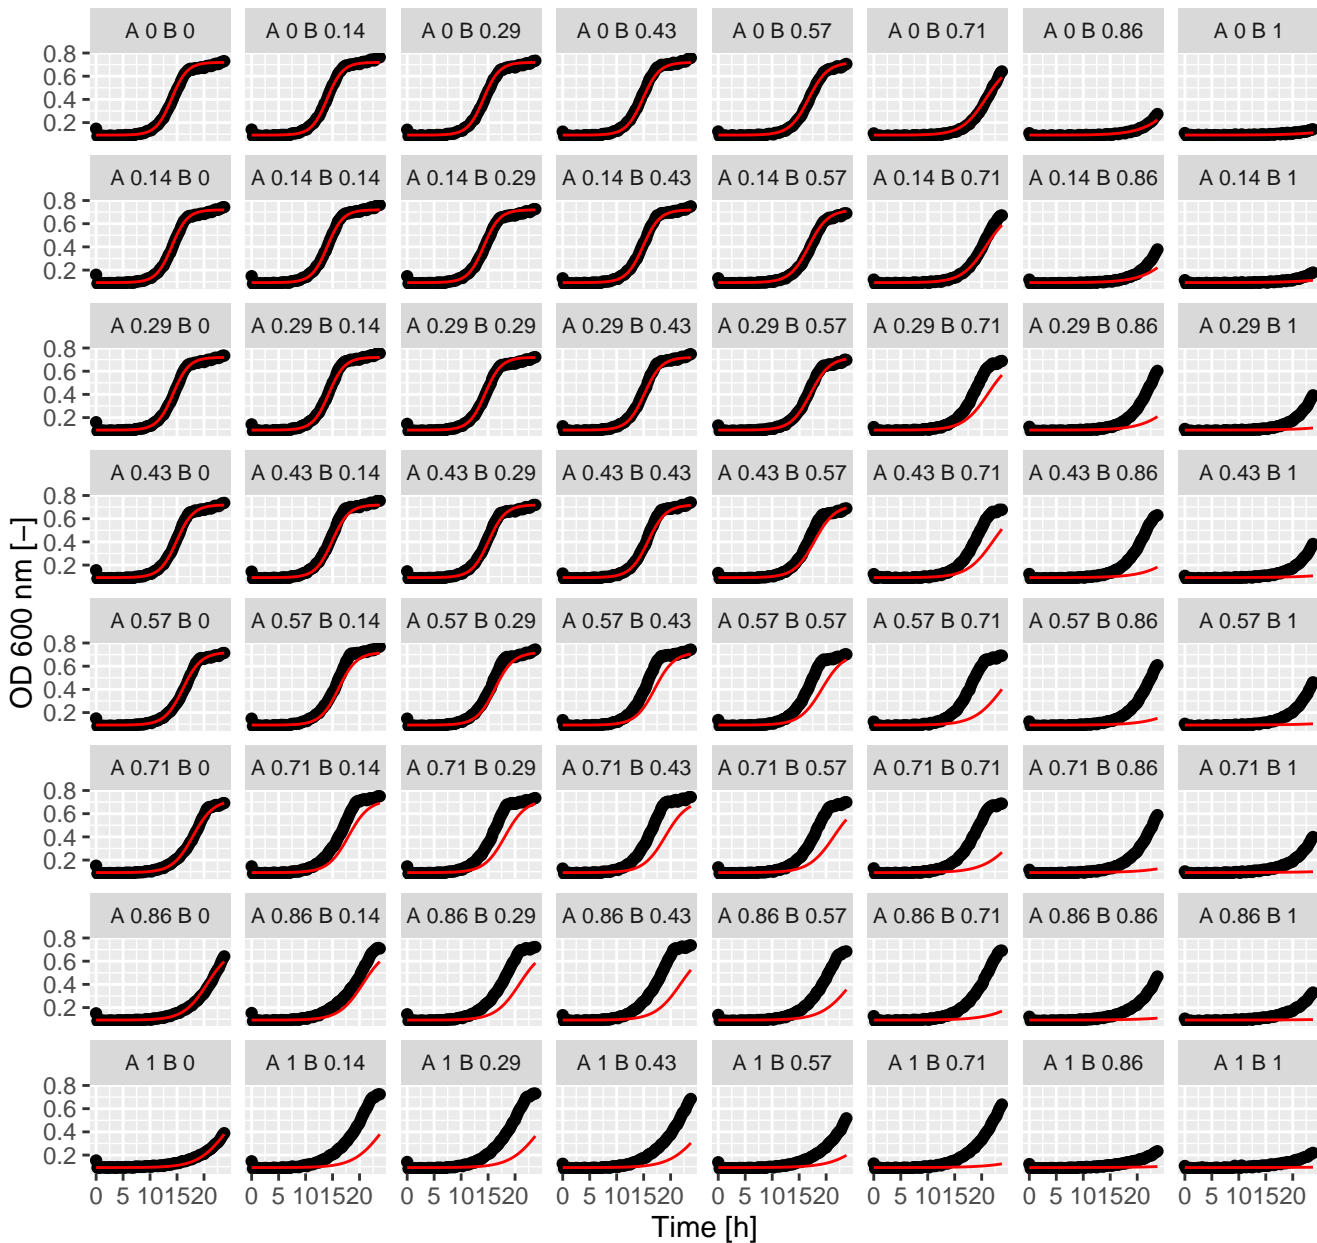

Myr.Sta (= Ax.Bx) full GPDI  
Int\_AB = 0.26 and Int\_BA = 0.42 at EC50

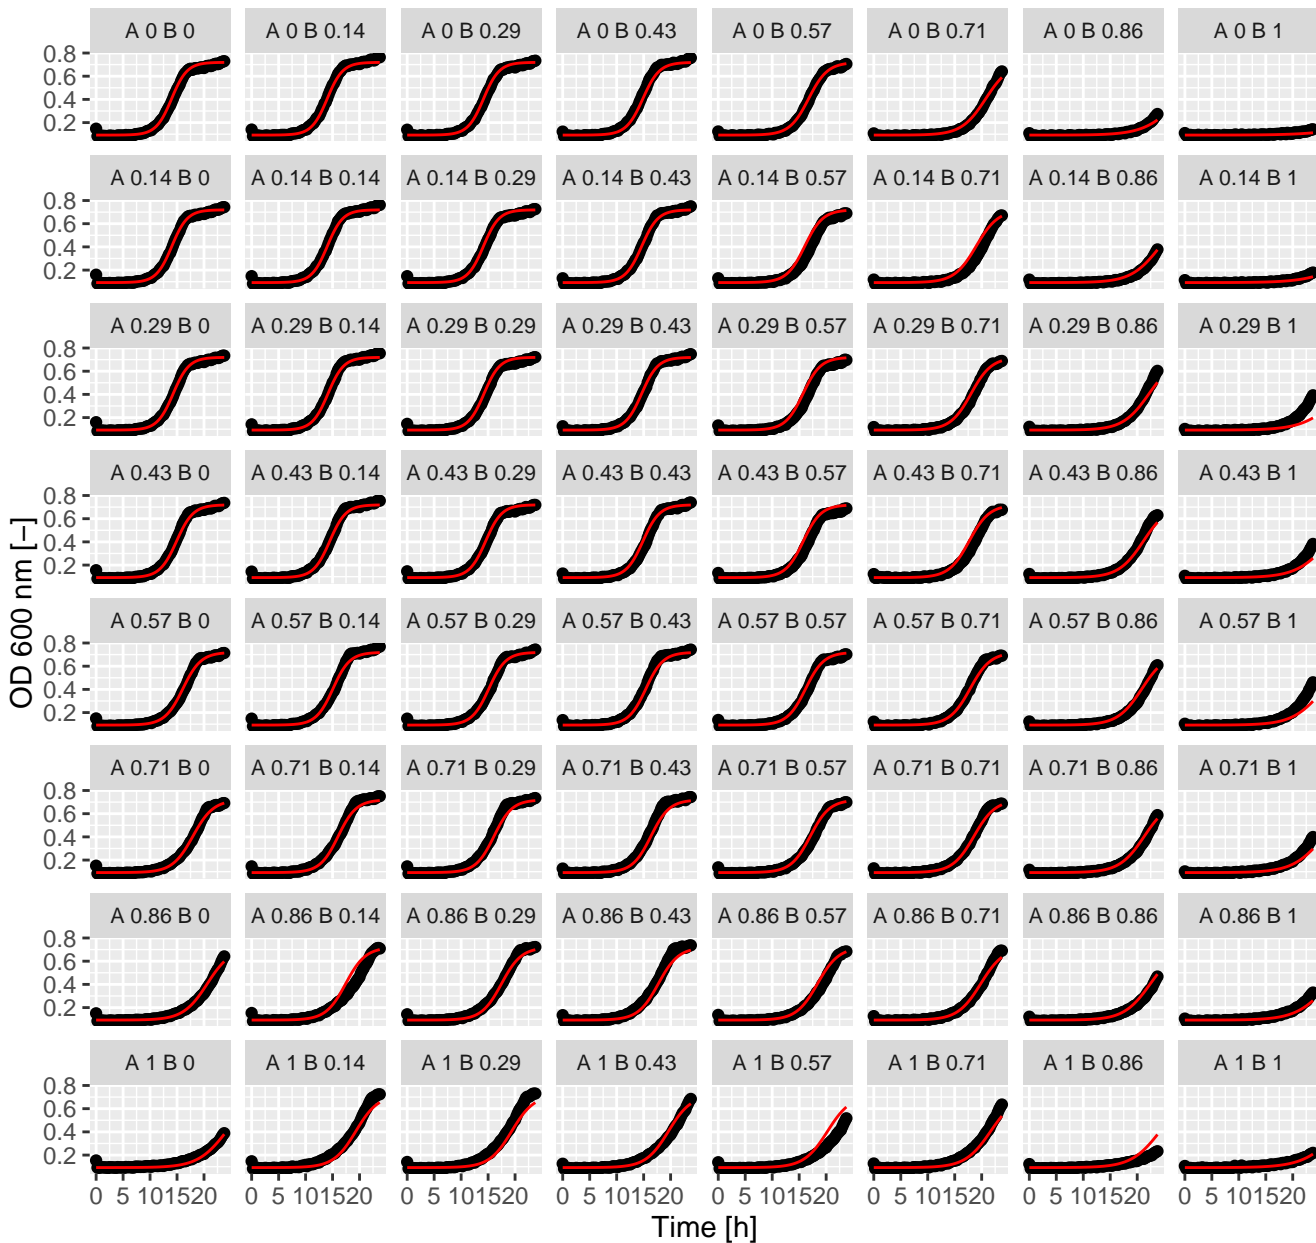



Myr.Rad (= Ax.Bx) exp. additivity (BI)  
Int\_AB = 0 and Int\_BA = 0 at EC50

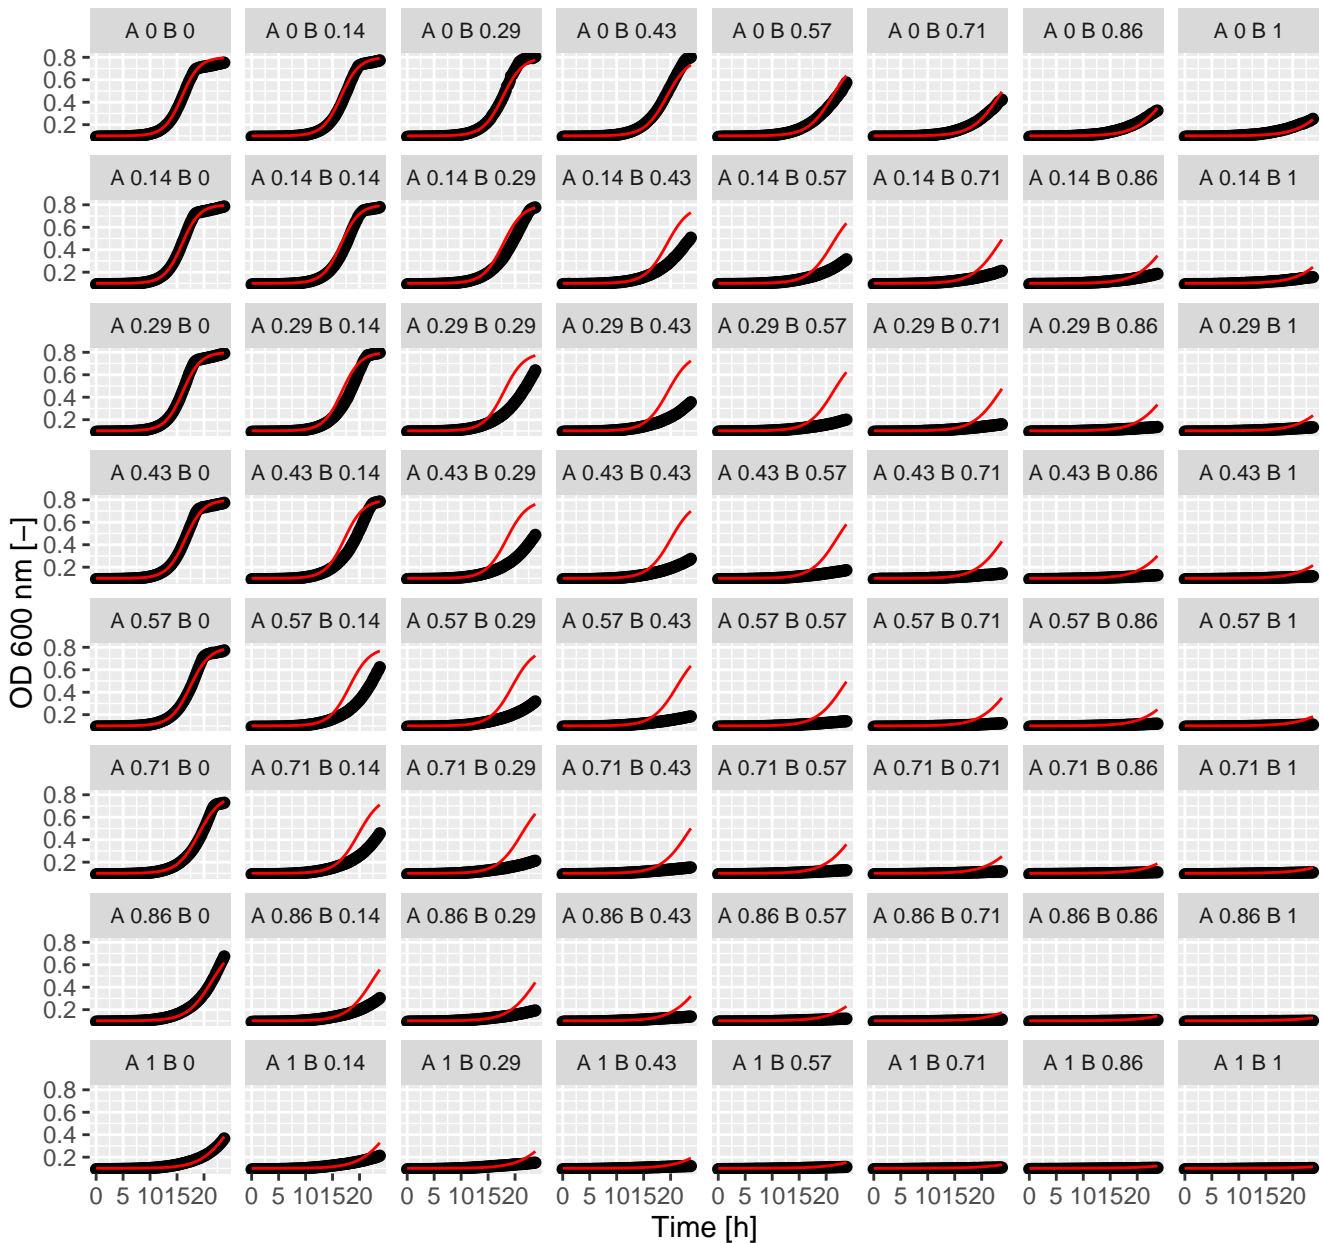

Myr.Rad (= Ax.Bx) full GPDI  
Int\_AB = -0.11 and Int\_BA = -0.61 at EC50

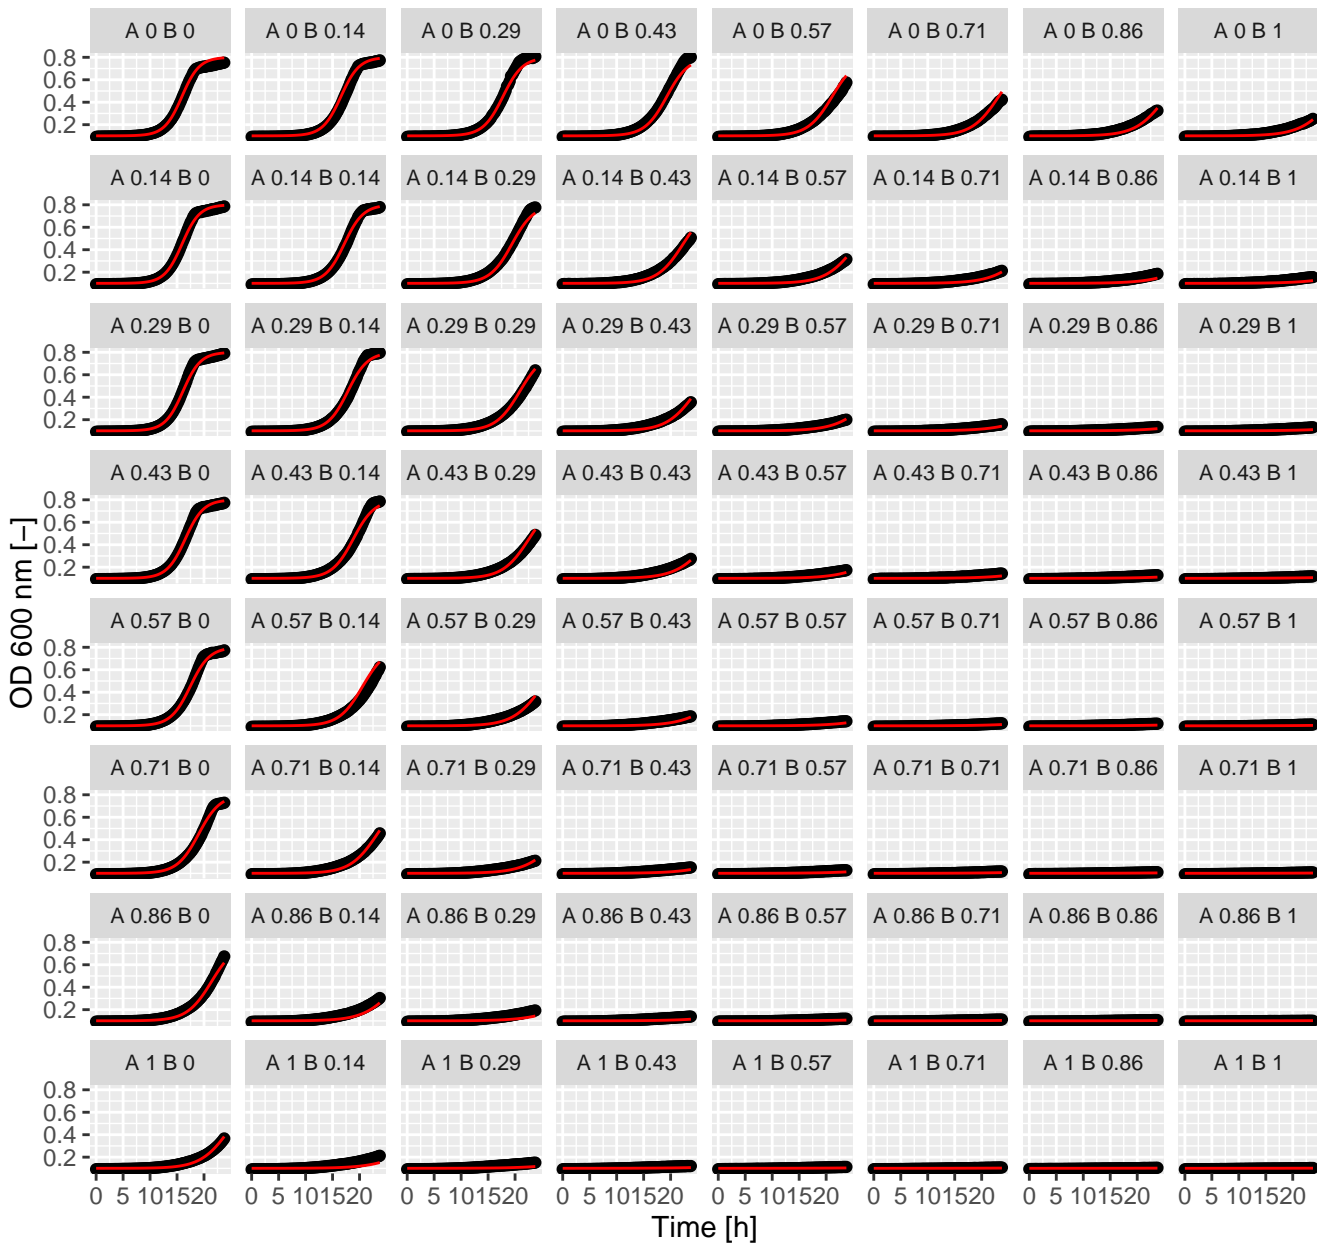

Myr.Qnn (= Ax.Bx) exp. additivity (BI)  
Int\_AB = 0 and Int\_BA = 0 at EC50

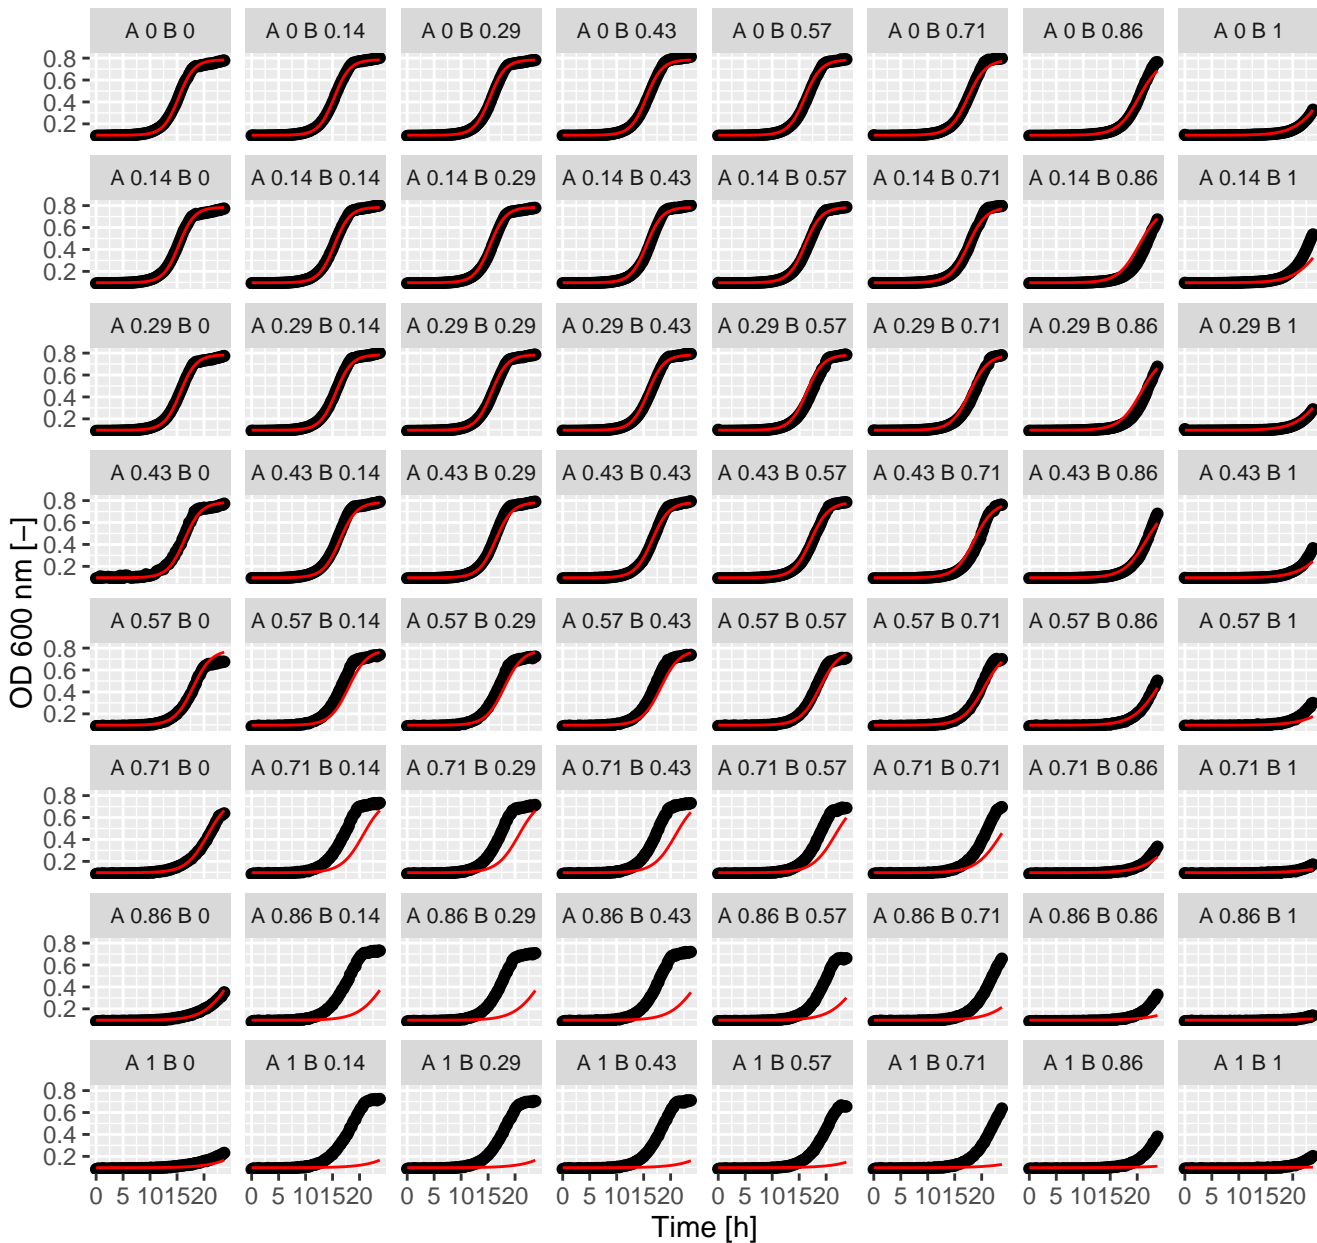

Myr.Qnn (= Ax.Bx) full GPDI  
Int\_AB = 0.63 and Int\_BA = -0.1 at EC50

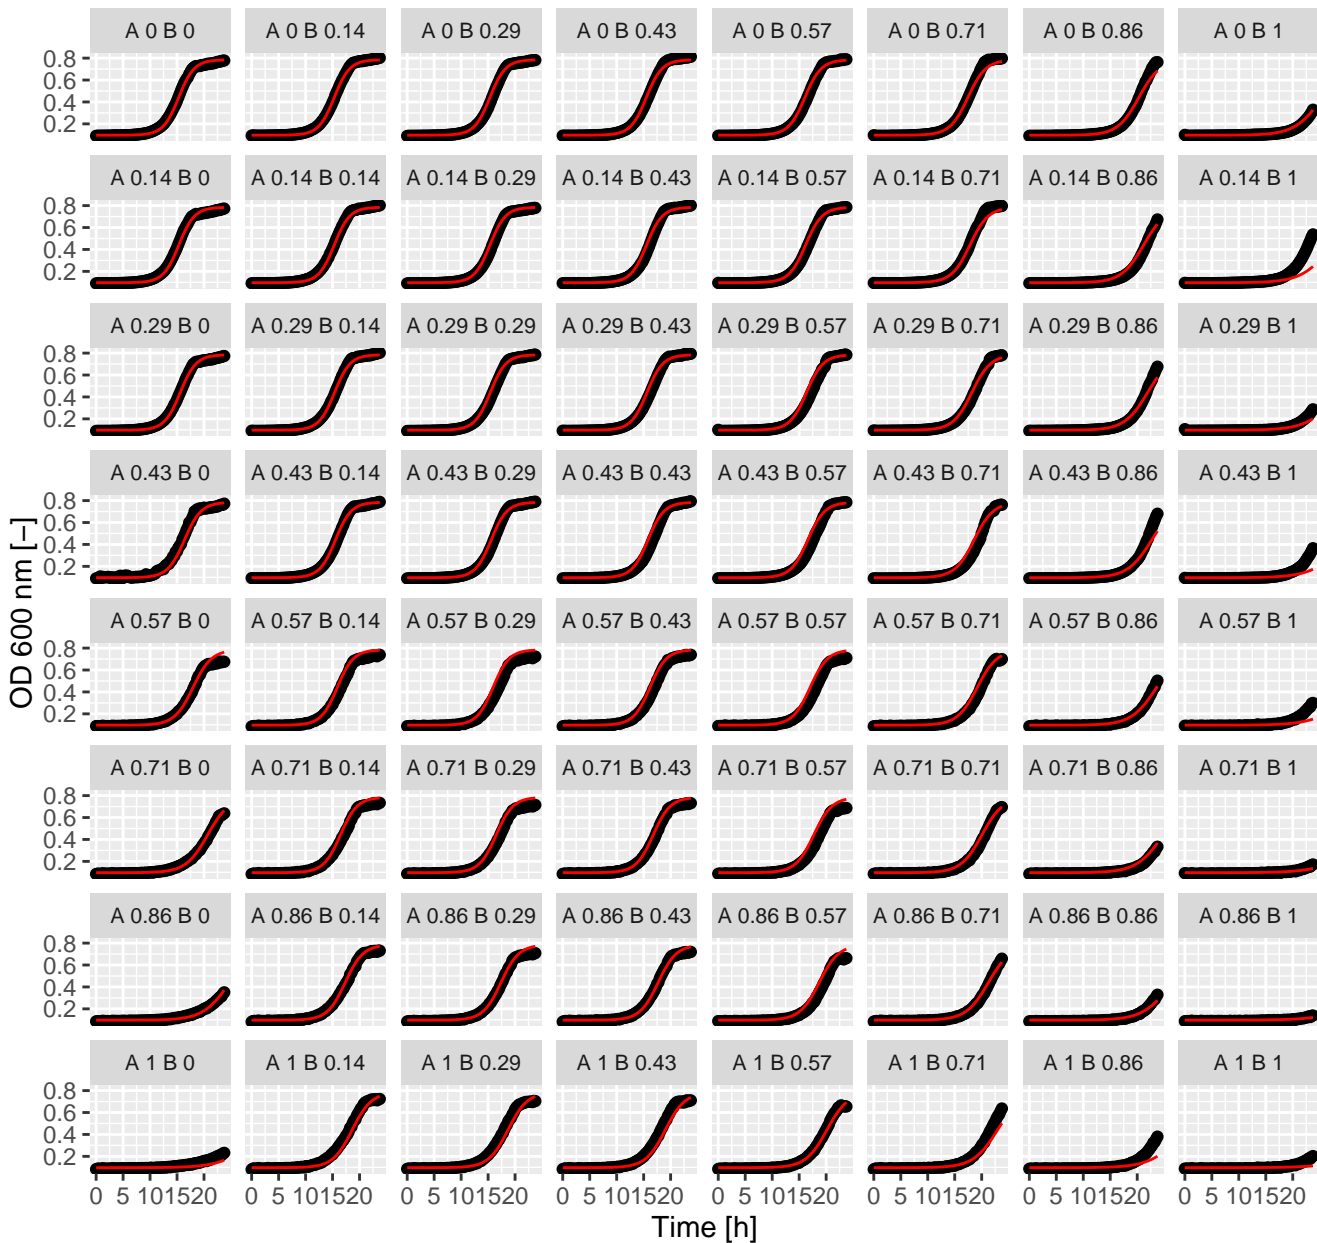

Myr.Pen (= Ax.Bx) exp. additivity (BI)  
Int\_AB = 0 and Int\_BA = 0 at EC50

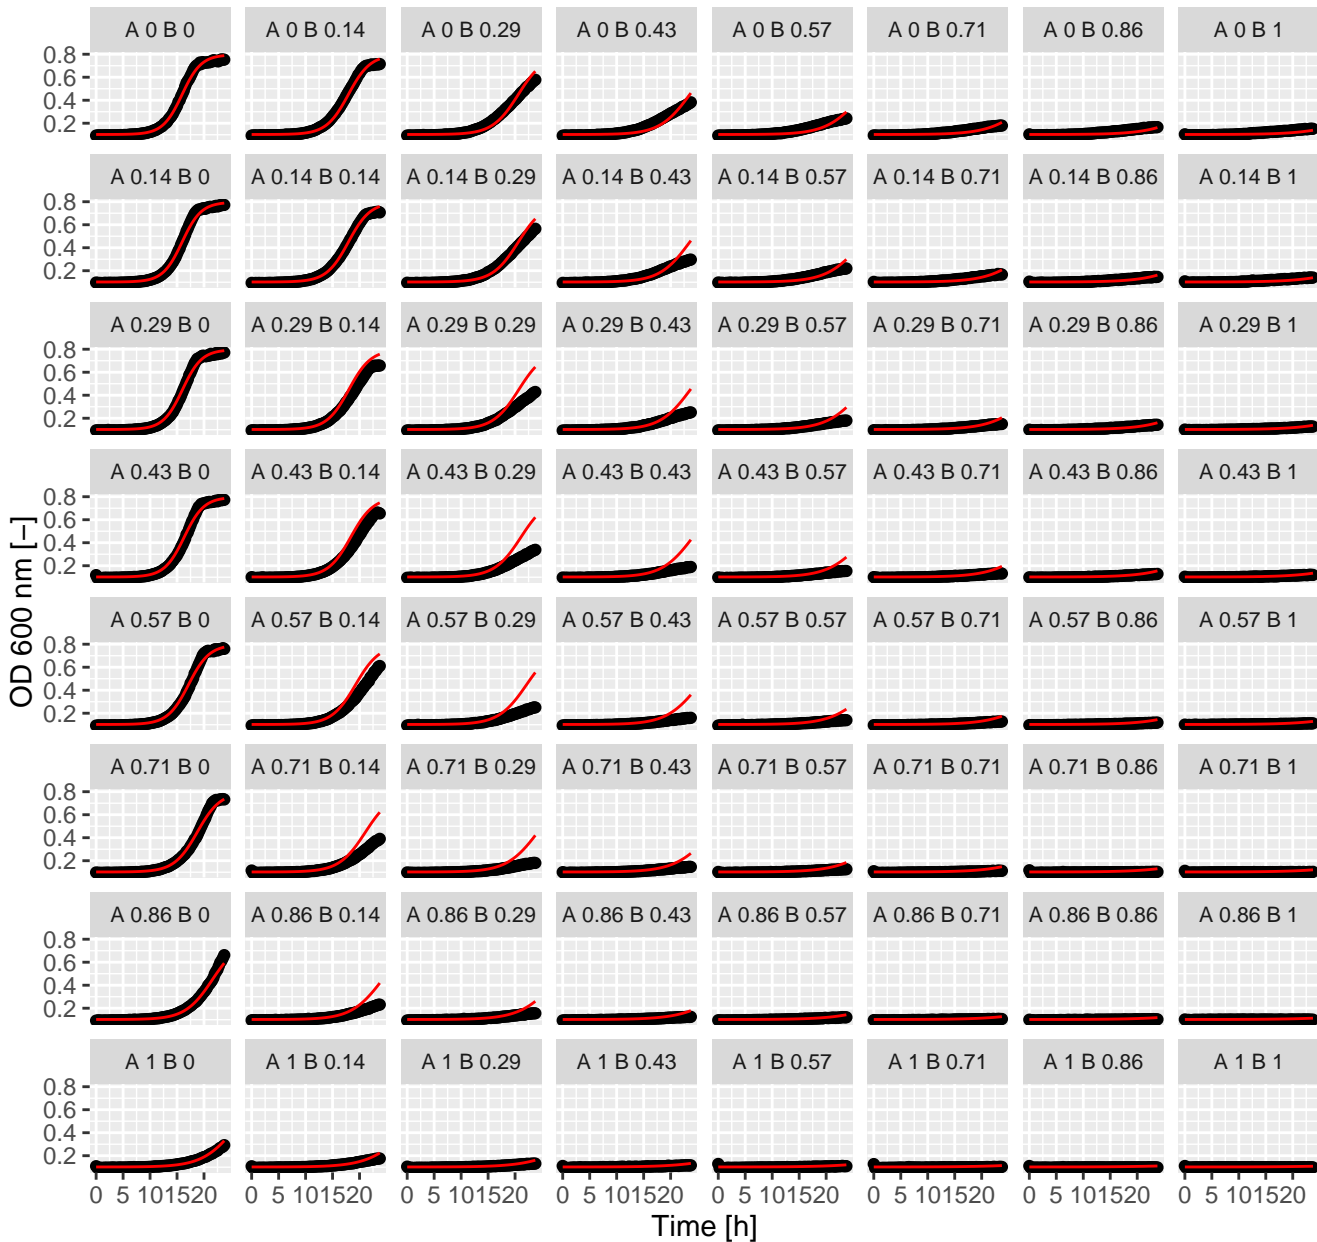

Myr.Pen (= Ax.Bx) full GPDI  
Int\_AB = 0.03 and Int\_BA = -0.57 at EC50

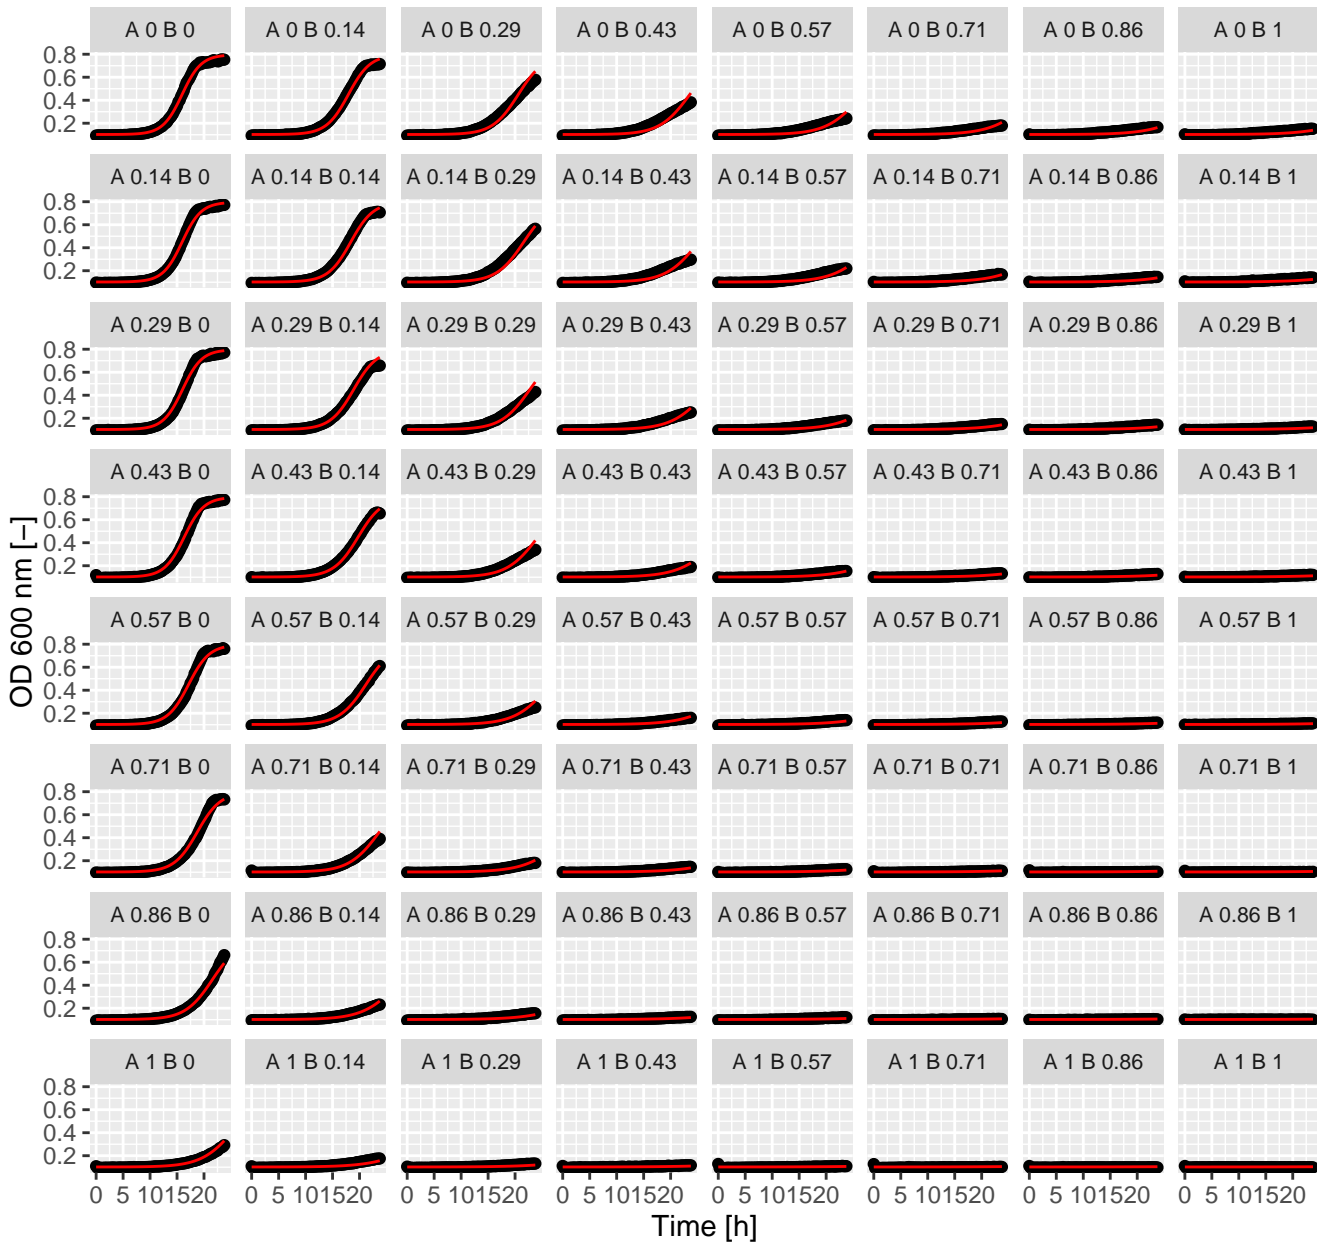

Myr.Myrr (= Ax.Bx) exp. additivity (BI)  
Int\_AB = 0 and Int\_BA = 0 at EC50

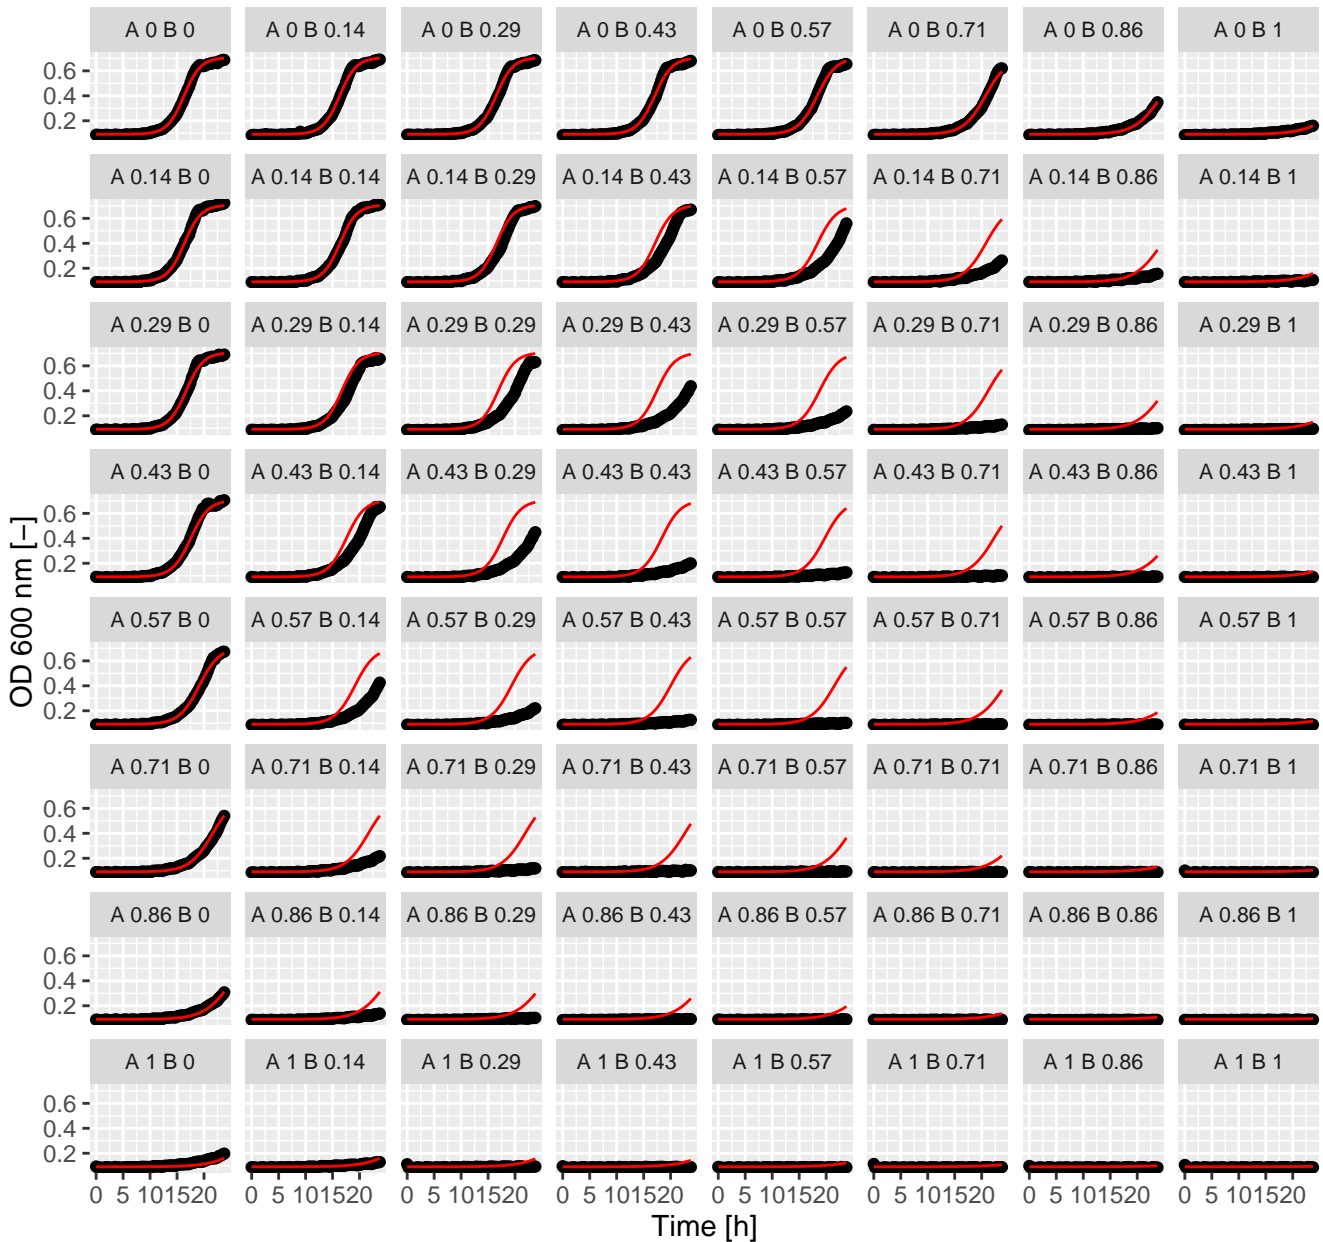

Myr.Myrr (= Ax.Bx) full GPDI  
Int\_AB = -0.62 and Int\_BA = -0.47 at EC50

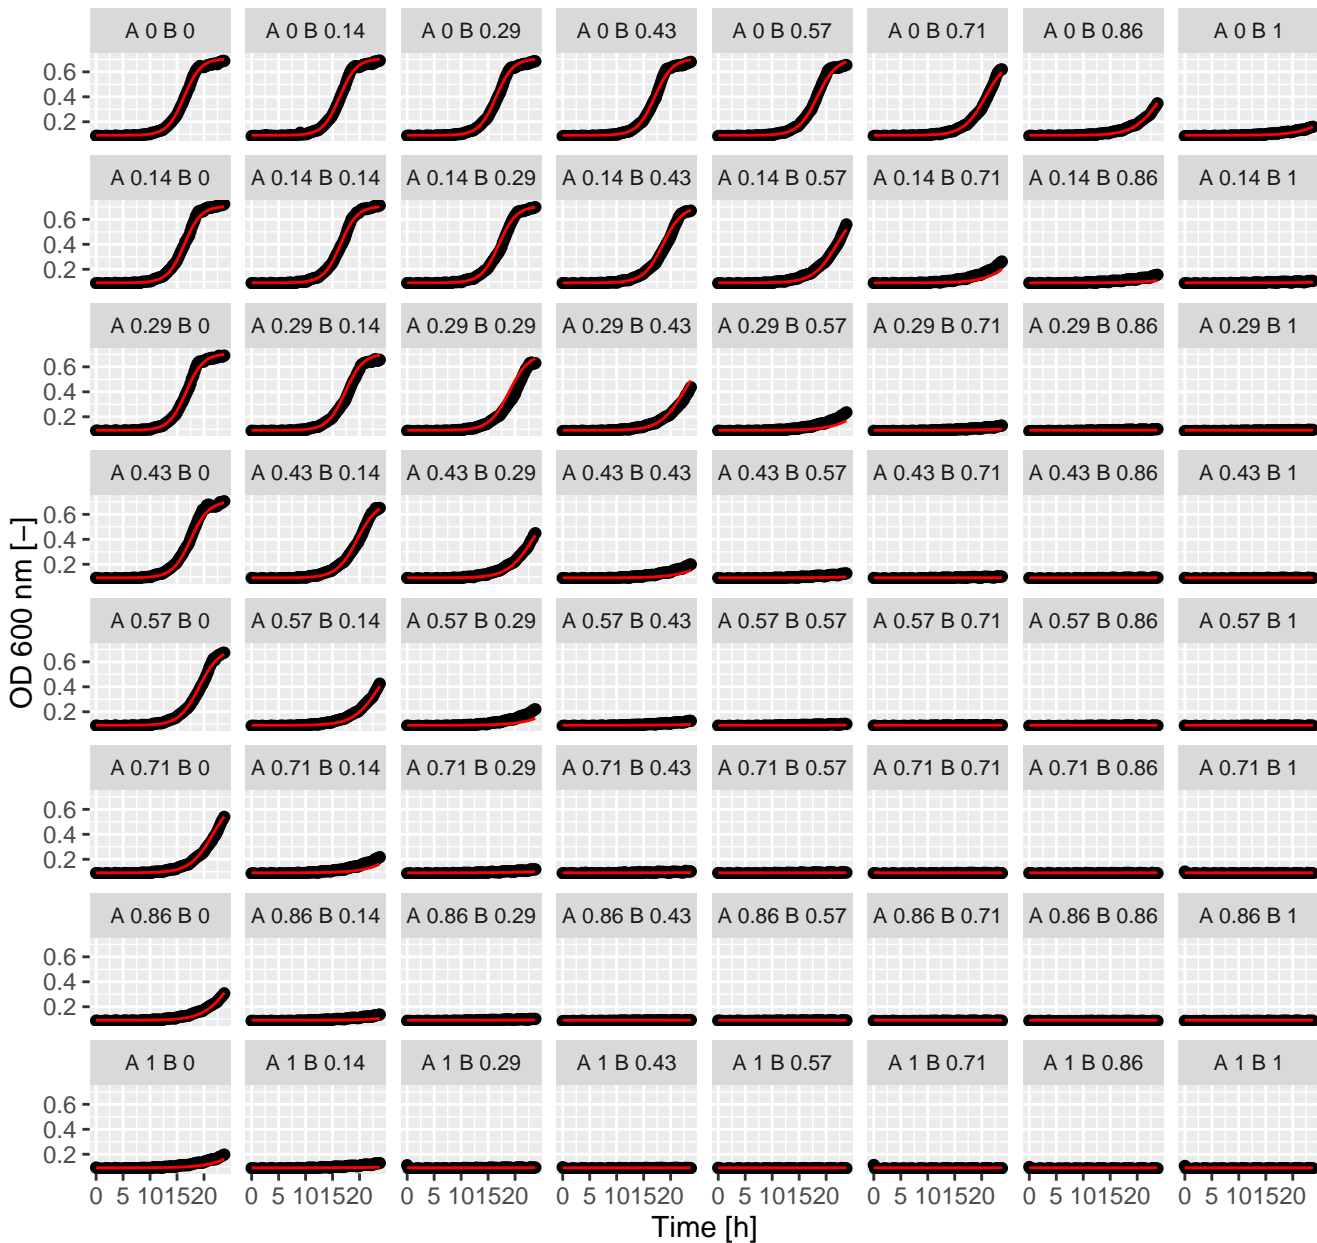



MMS.Ter (= Ax.Bx) exp. additivity (BI)  
Int\_AB = 0 and Int\_BA = 0 at EC50

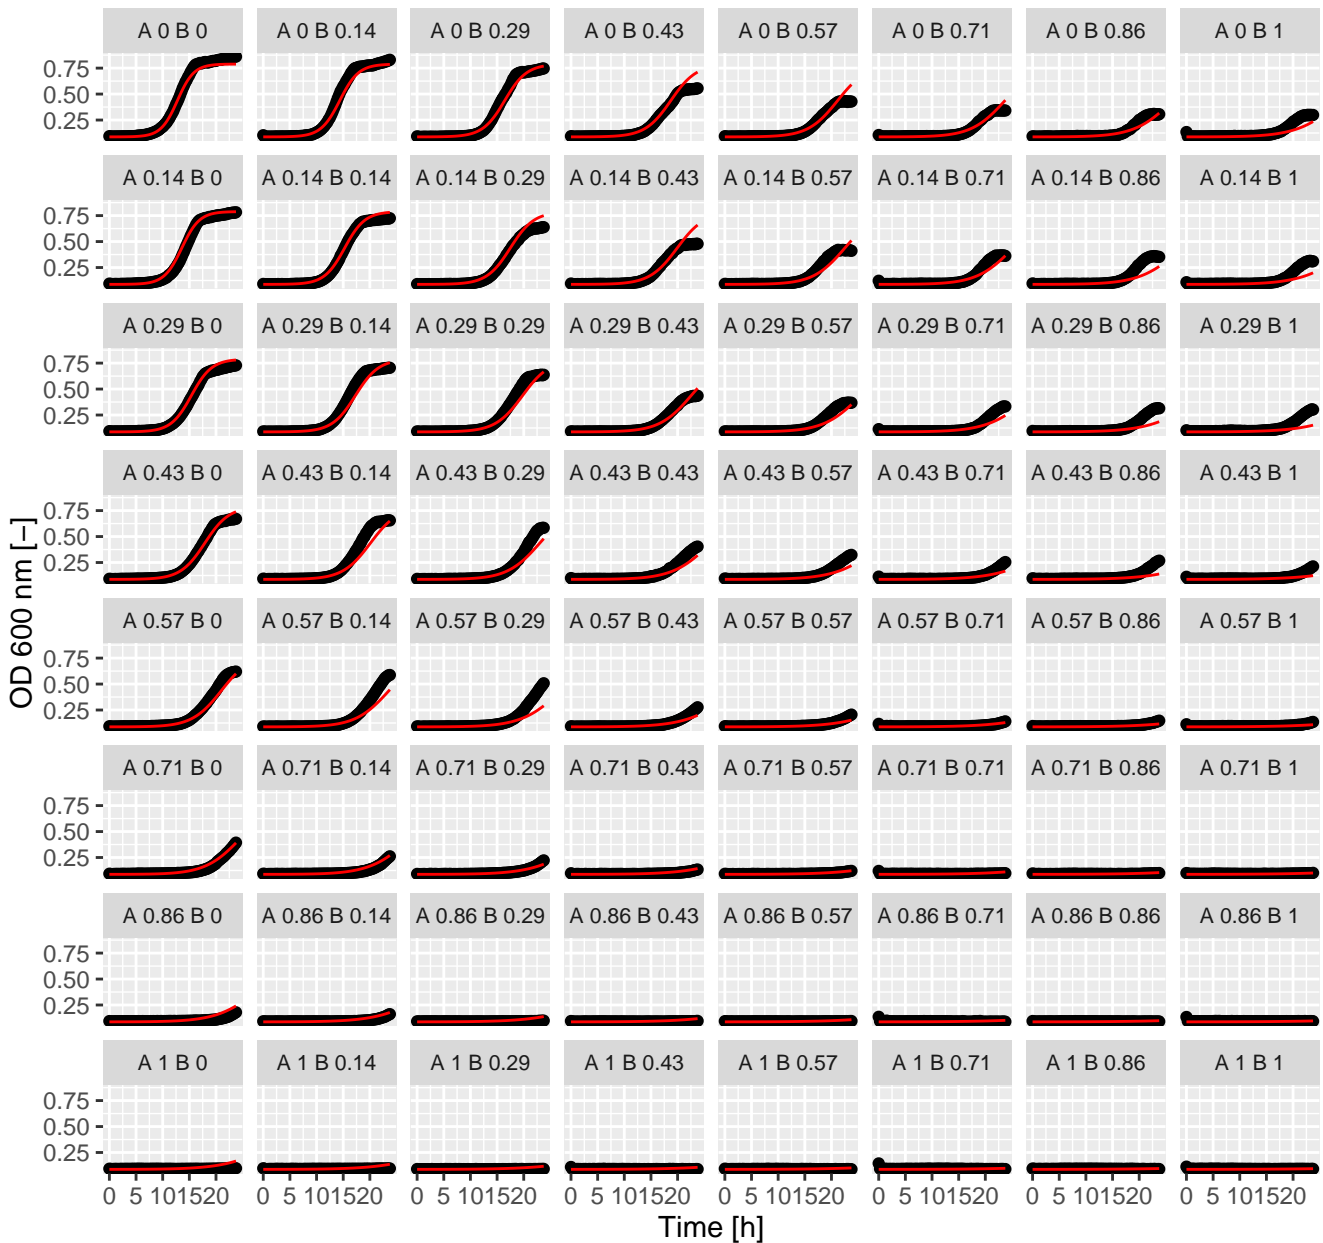

MMS.Ter (= Ax.Bx) full GPDI  
Int\_AB = 0.06 and Int\_BA = 0.23 at EC50

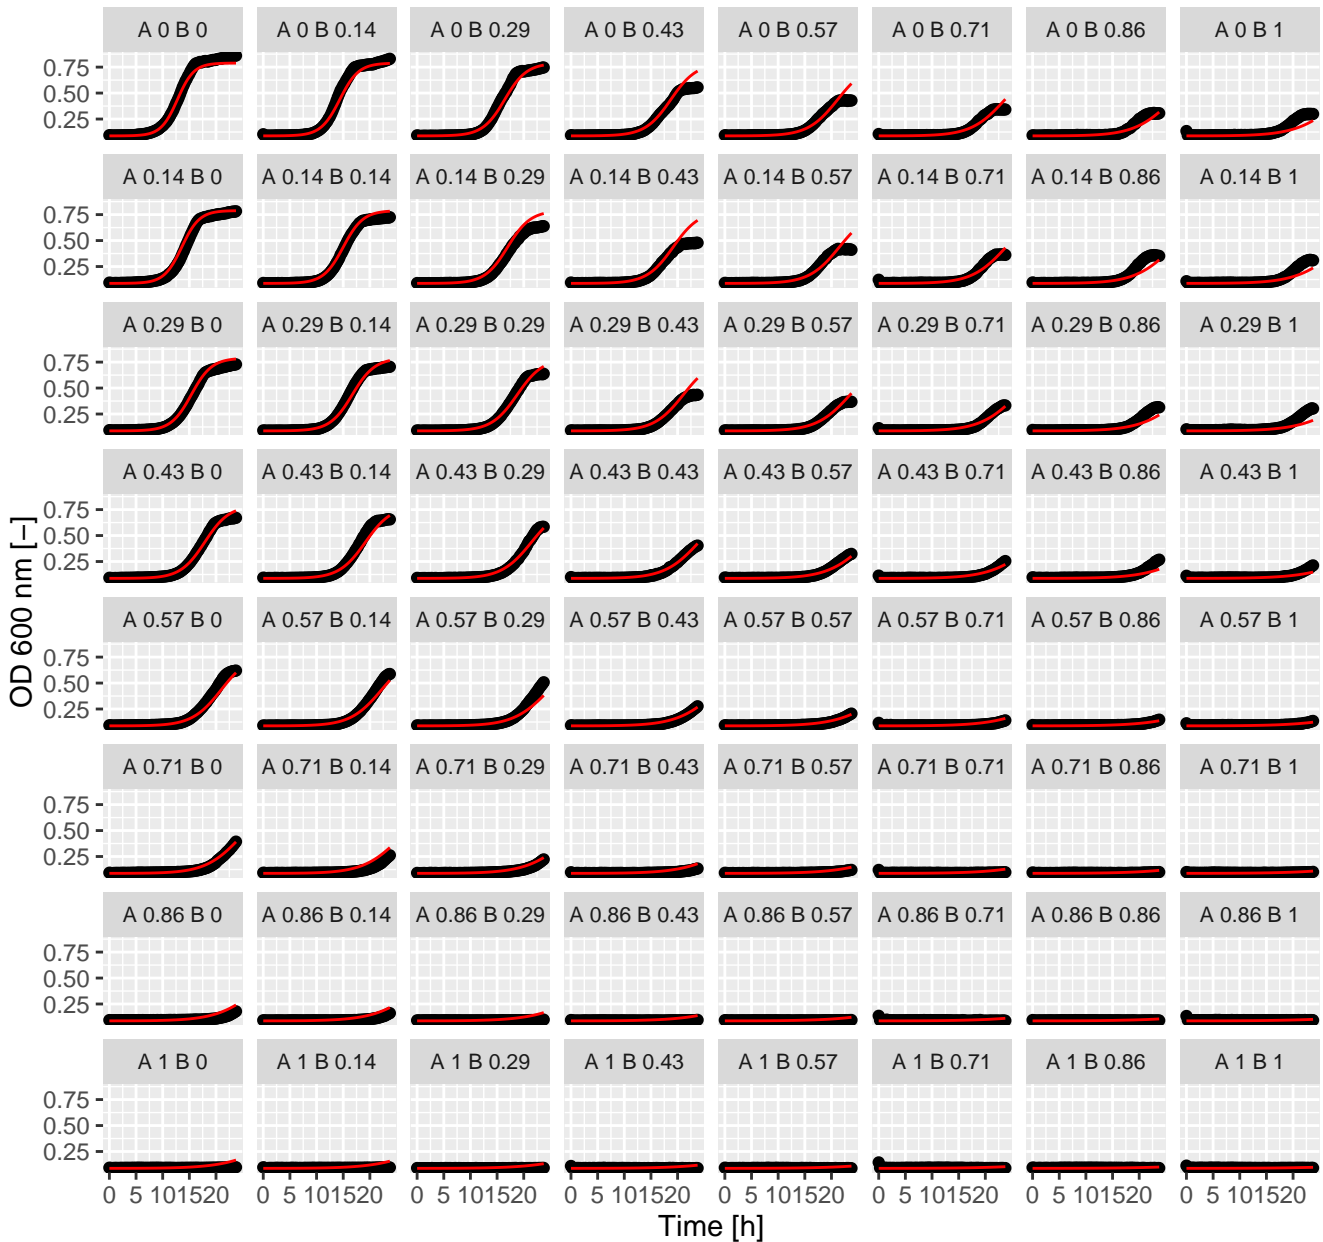

MMS.Tac (= Ax.Bx) exp. additivity (BI)  
Int\_AB = 0 and Int\_BA = 0 at EC50

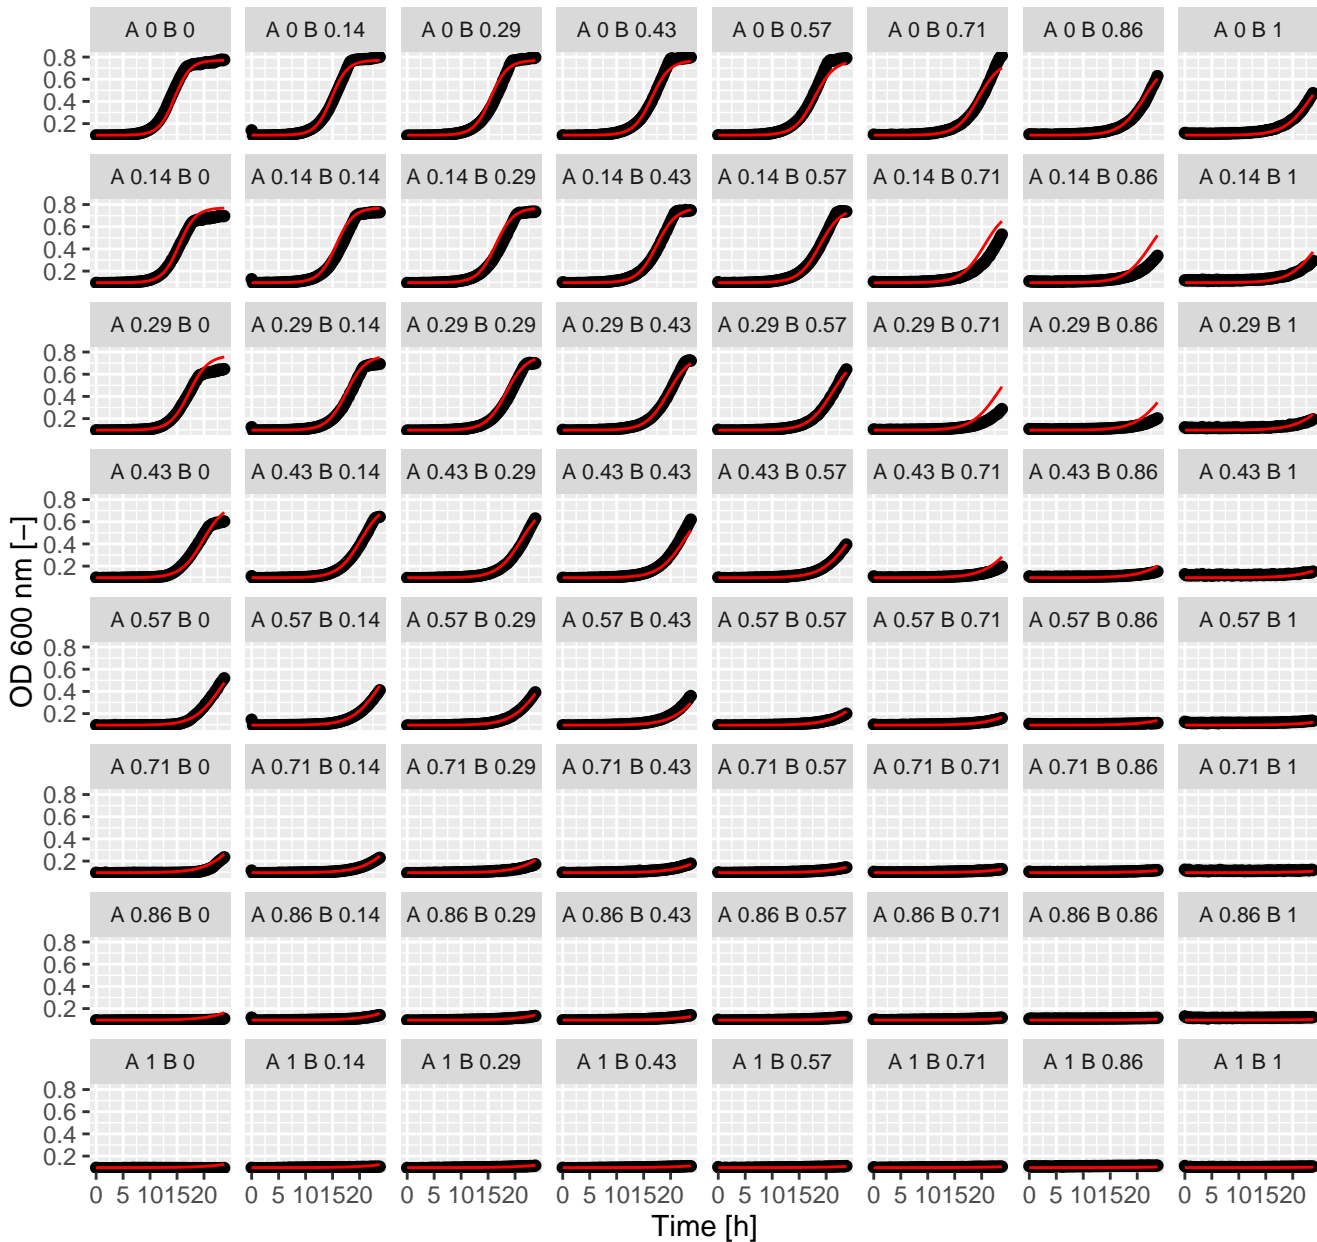

MMS.Tac (= Ax.Bx) full GPDI  
Int\_AB = 0.16 and Int\_BA = -0.14 at EC50

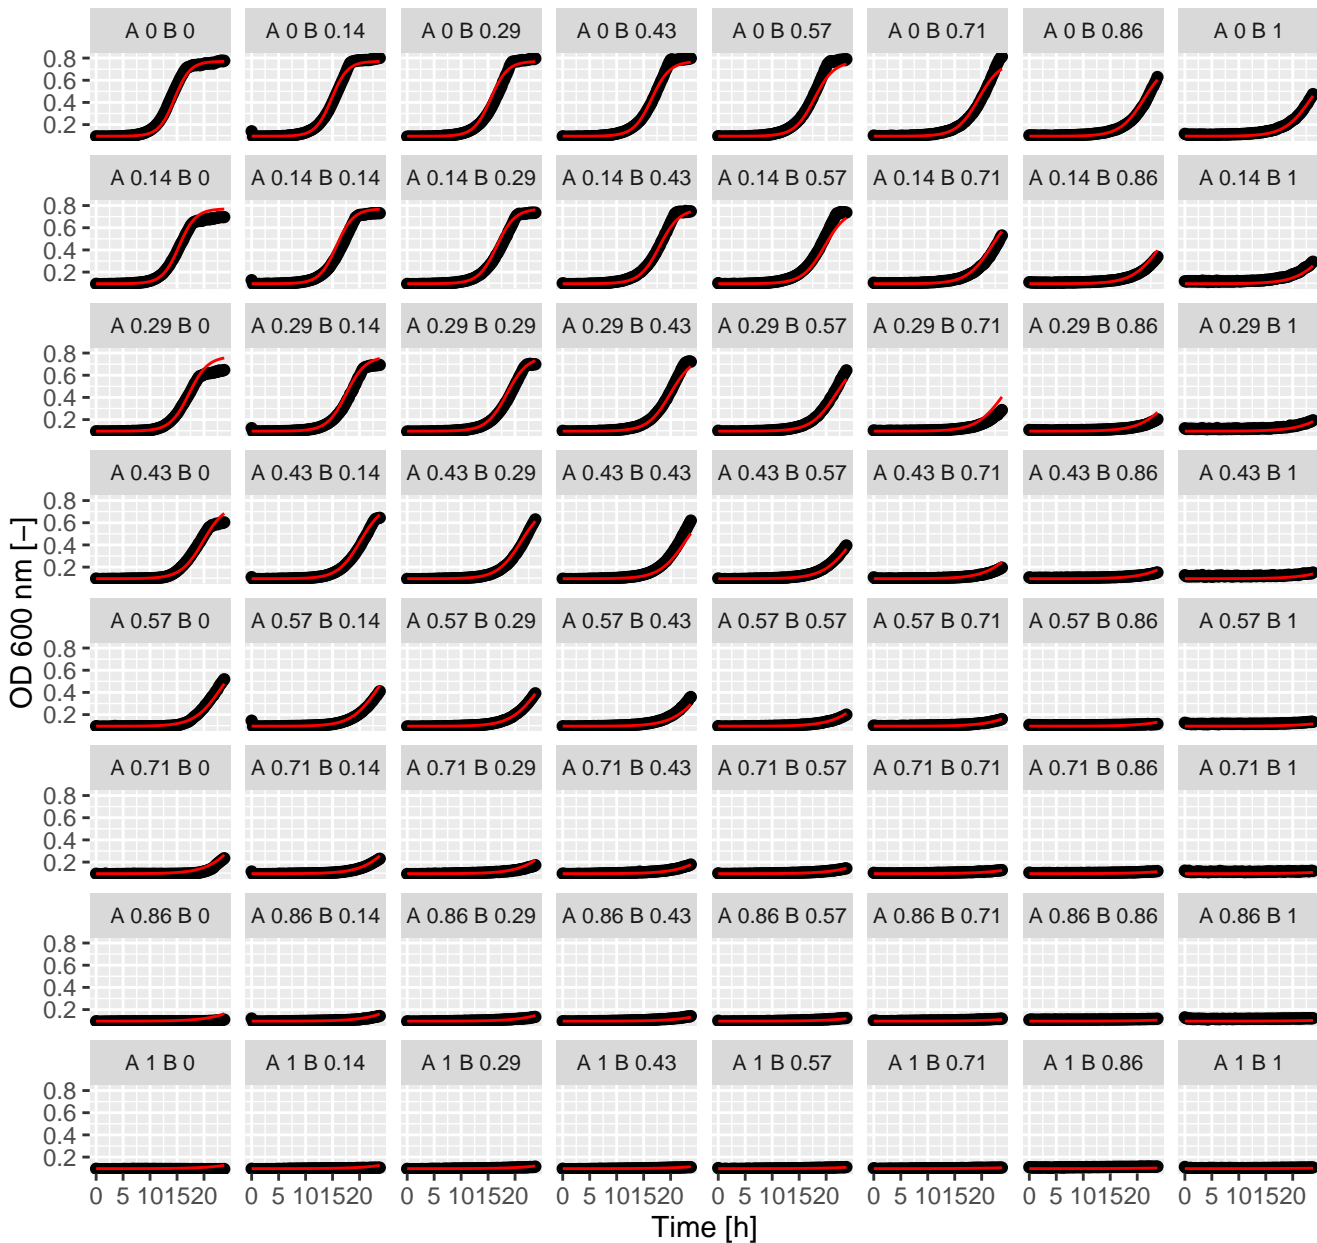

MMS.Sta (= Ax.Bx) exp. additivity (BI)  
Int\_AB = 0 and Int\_BA = 0 at EC50

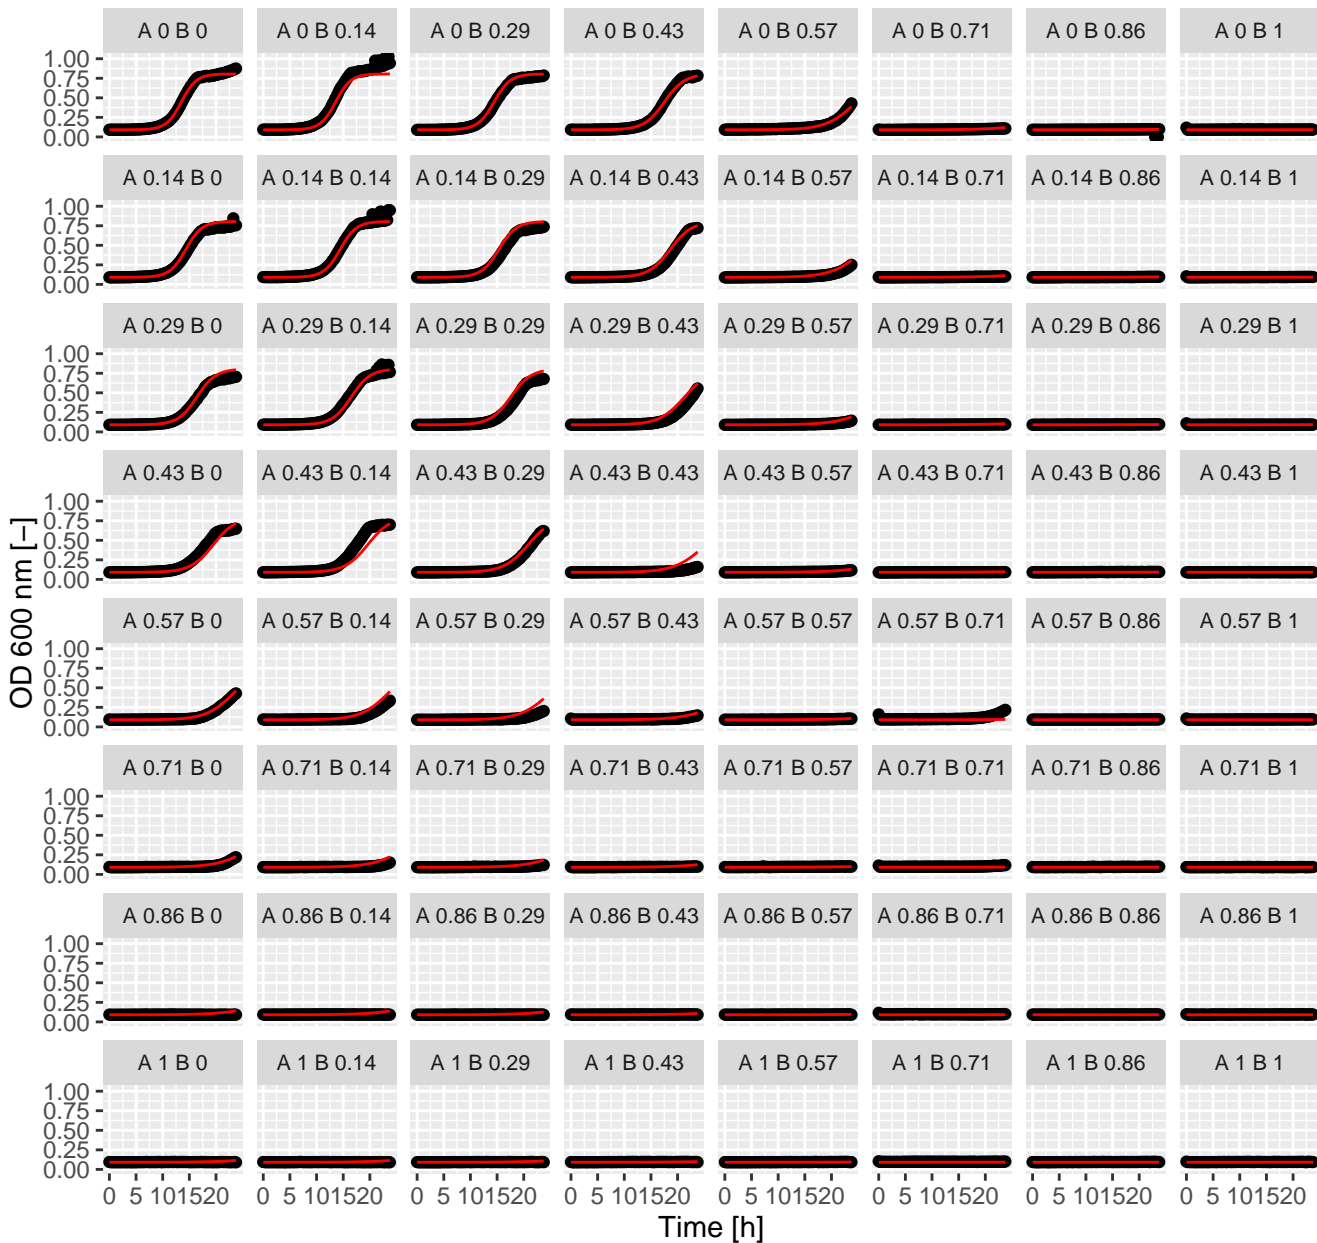

MMS.Sta (= Ax.Bx) full GPDI  
Int\_AB = 0.02 and Int\_BA = -0.21 at EC50

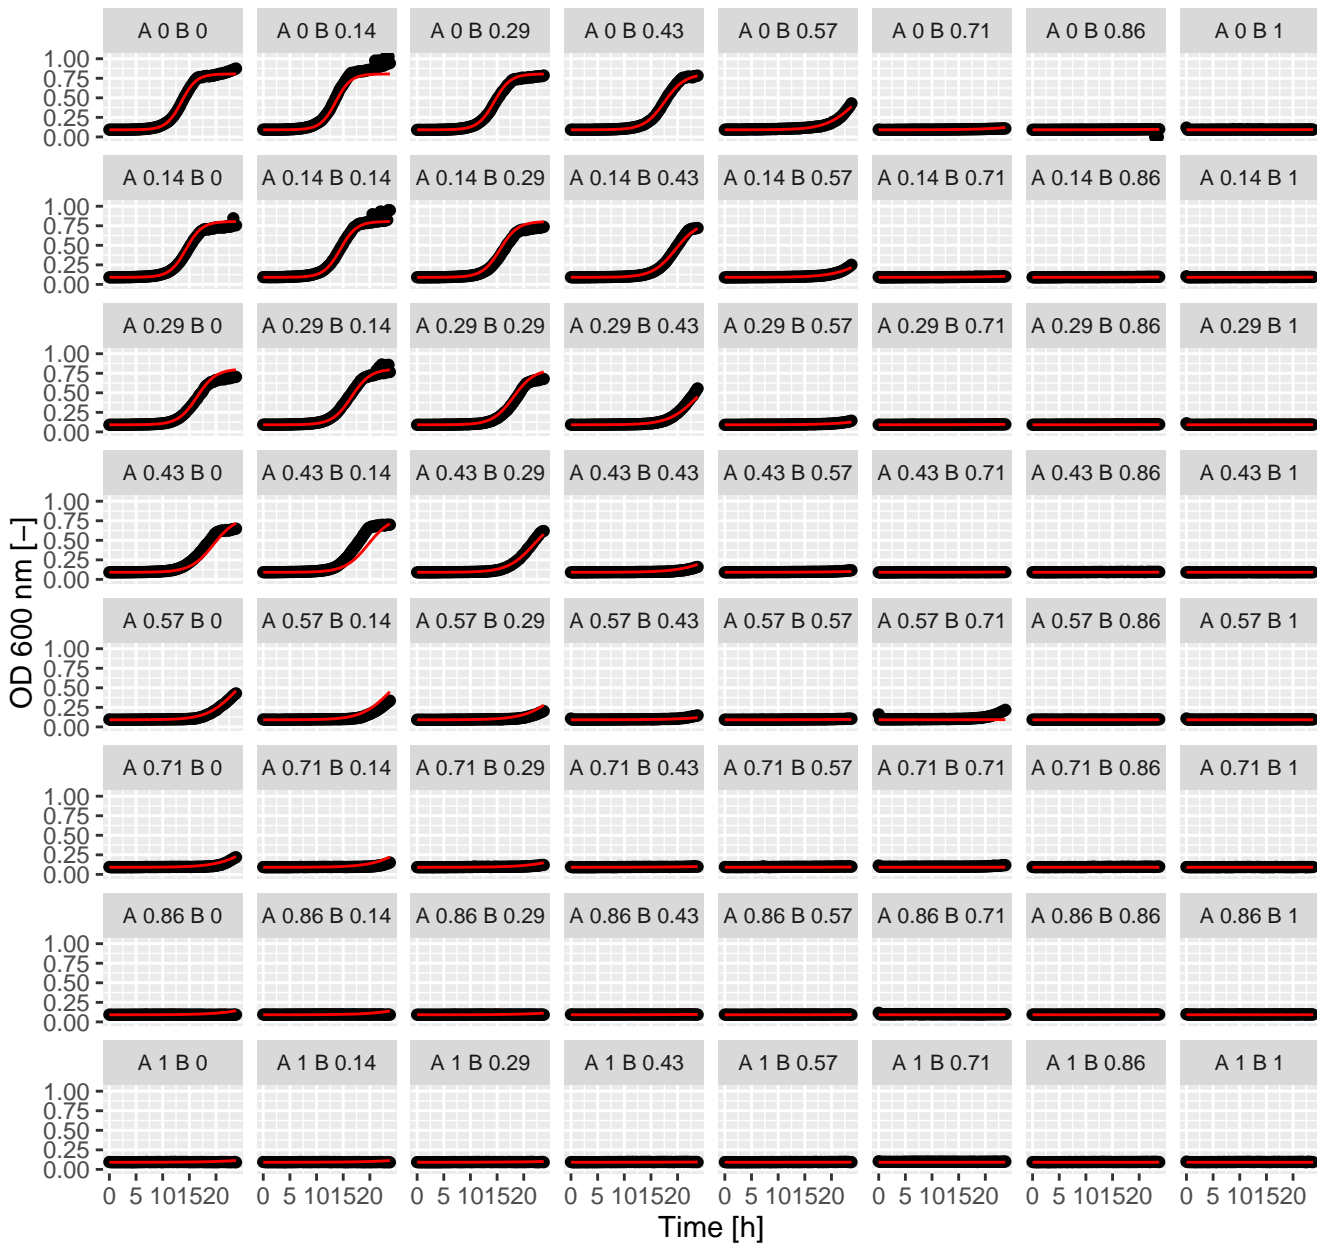

MMS.Pen (= Ax.Bx) exp. additivity (BI)  
Int\_AB = 0 and Int\_BA = 0 at EC50

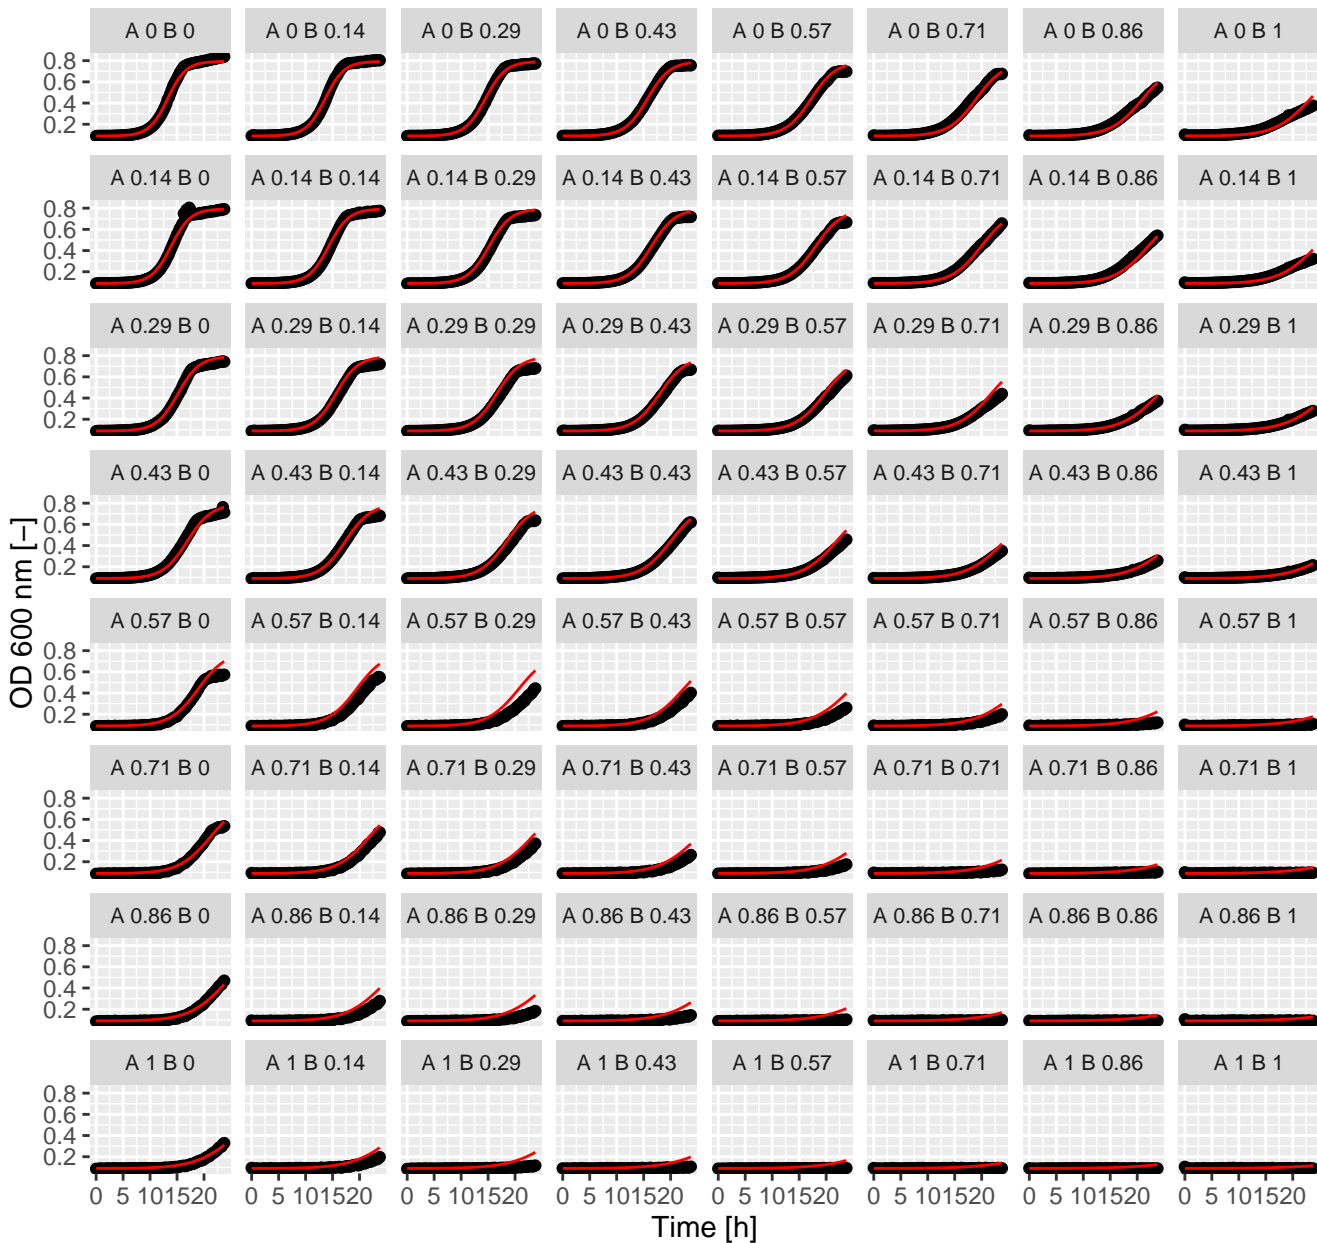

MMS.Pen (= Ax.Bx) full GPDI  
Int\_AB = -0.35 and Int\_BA = 0.25 at EC50

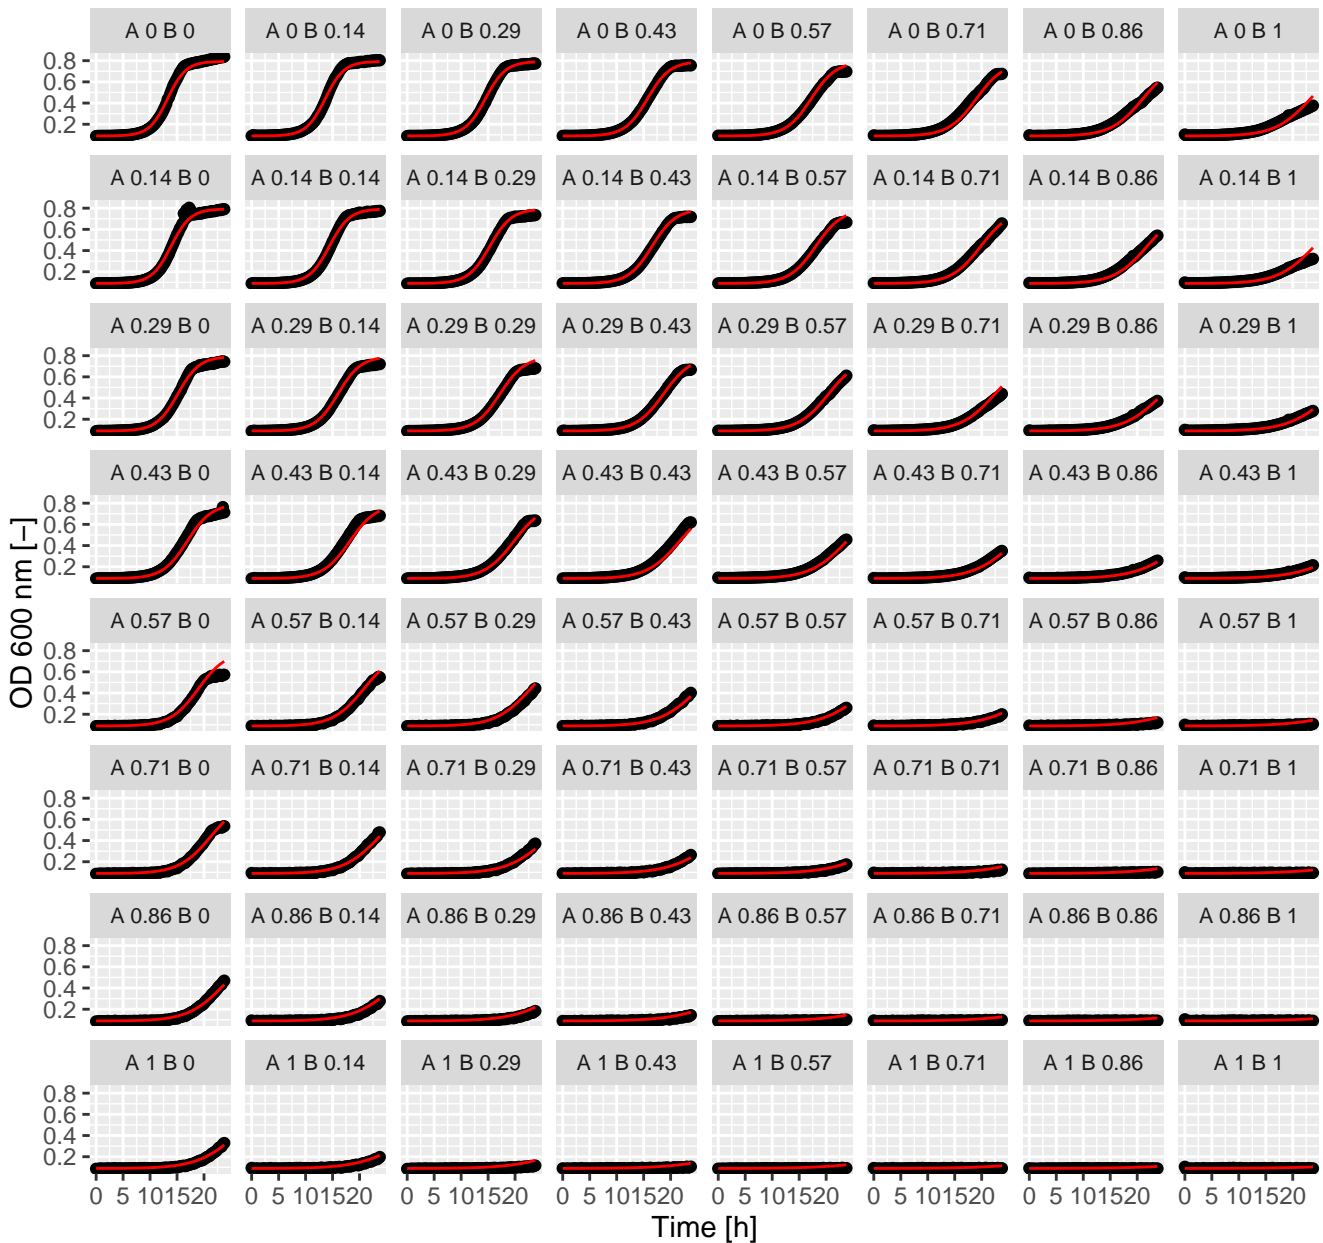



MMS.MMS (= Ax.Bx) exp. additivity (BI)  
Int\_AB = 0 and Int\_BA = 0 at EC50

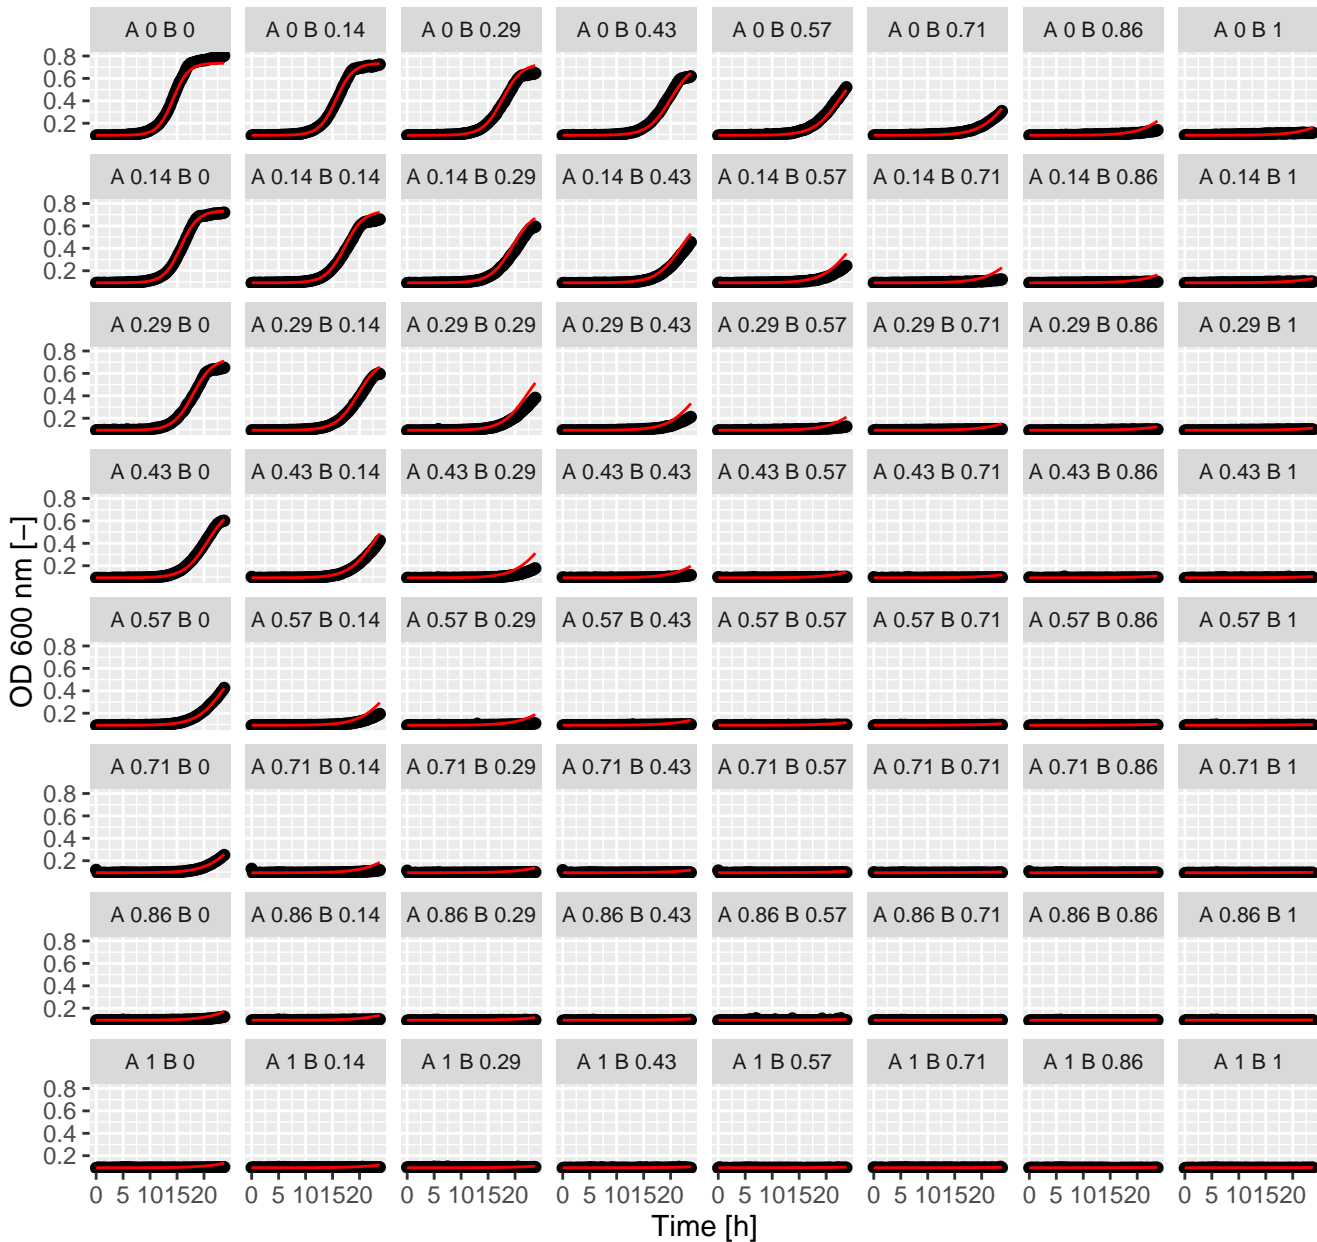

MMS.MMS (= Ax.Bx) full GPD1  
Int\_AB = -0.03 and Int\_BA = -0.44 at EC50

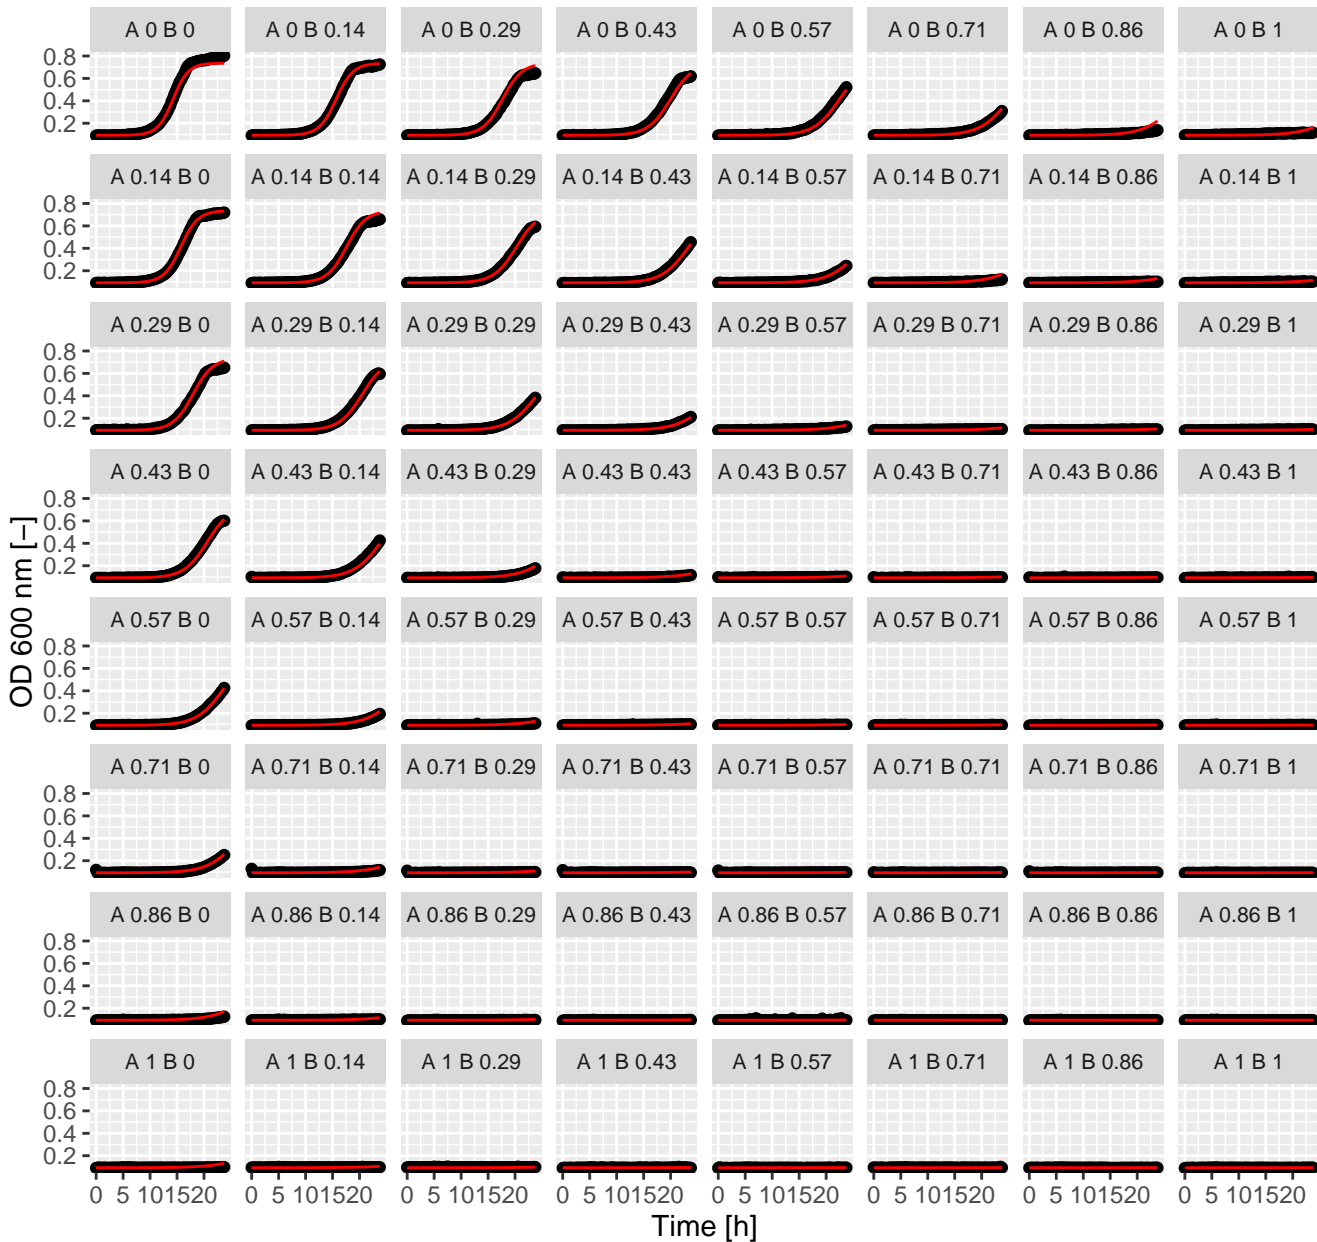

Met.Ter (= Ax.Bx) exp. additivity (BI)  
Int\_AB = 0 and Int\_BA = 0 at EC50

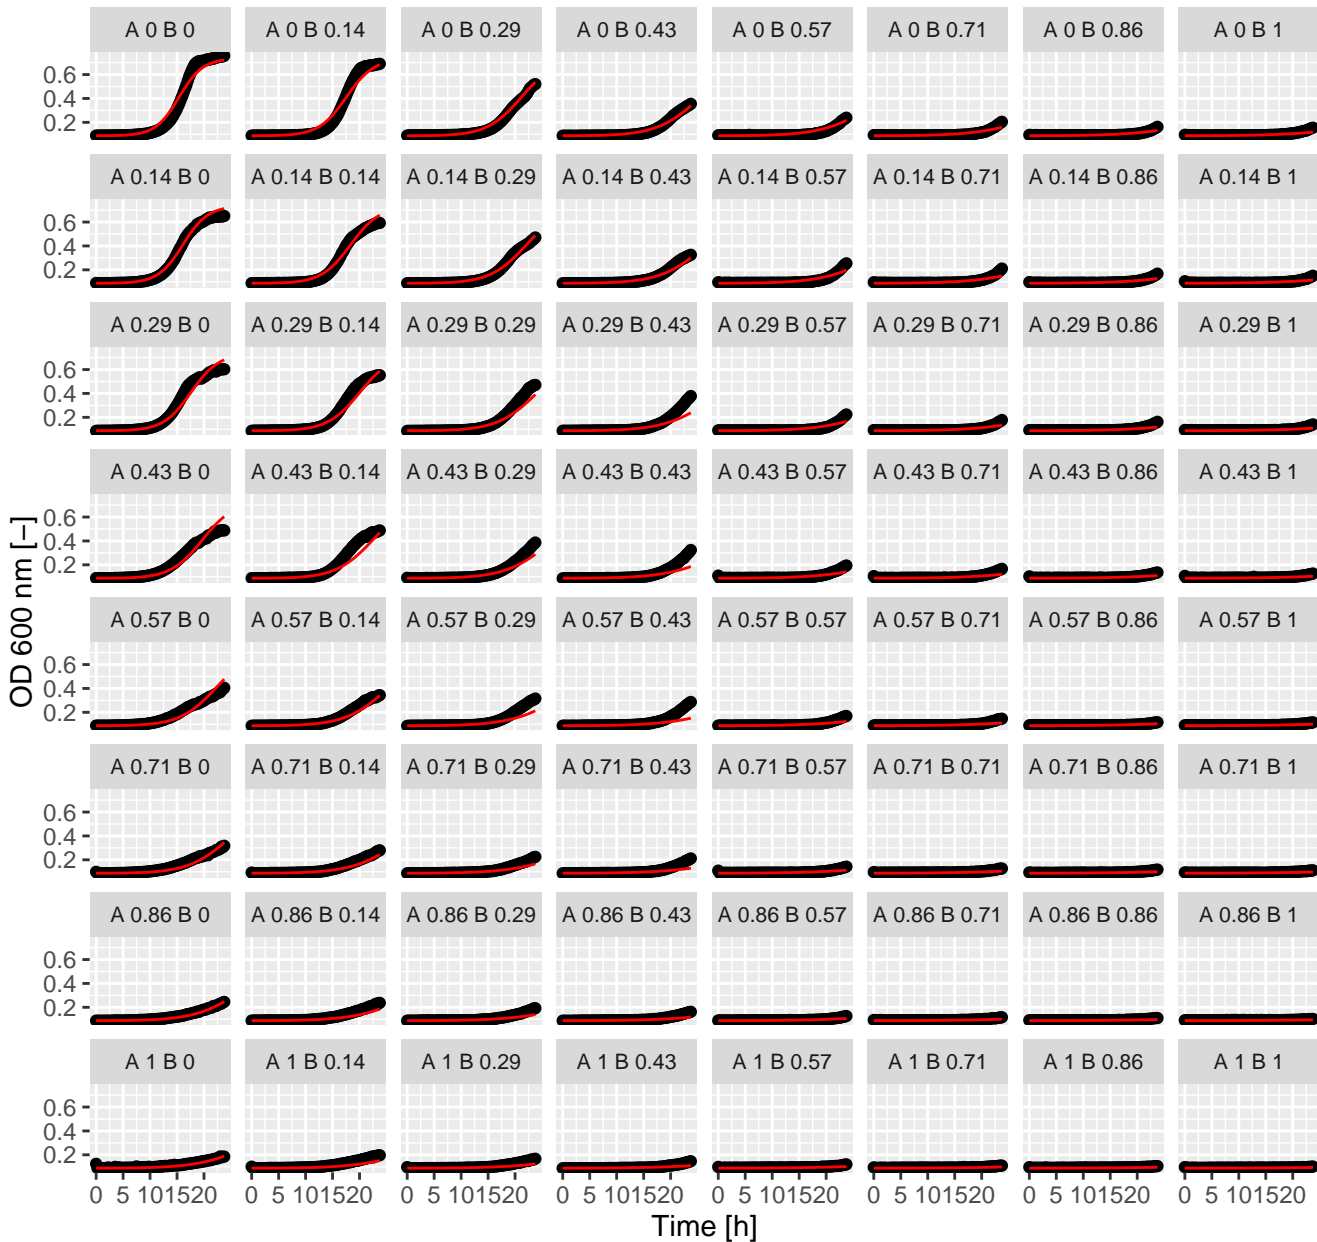

Met.Ter (= Ax.Bx) full GPDI  
Int\_AB = 0.3 and Int\_BA = 0.24 at EC50

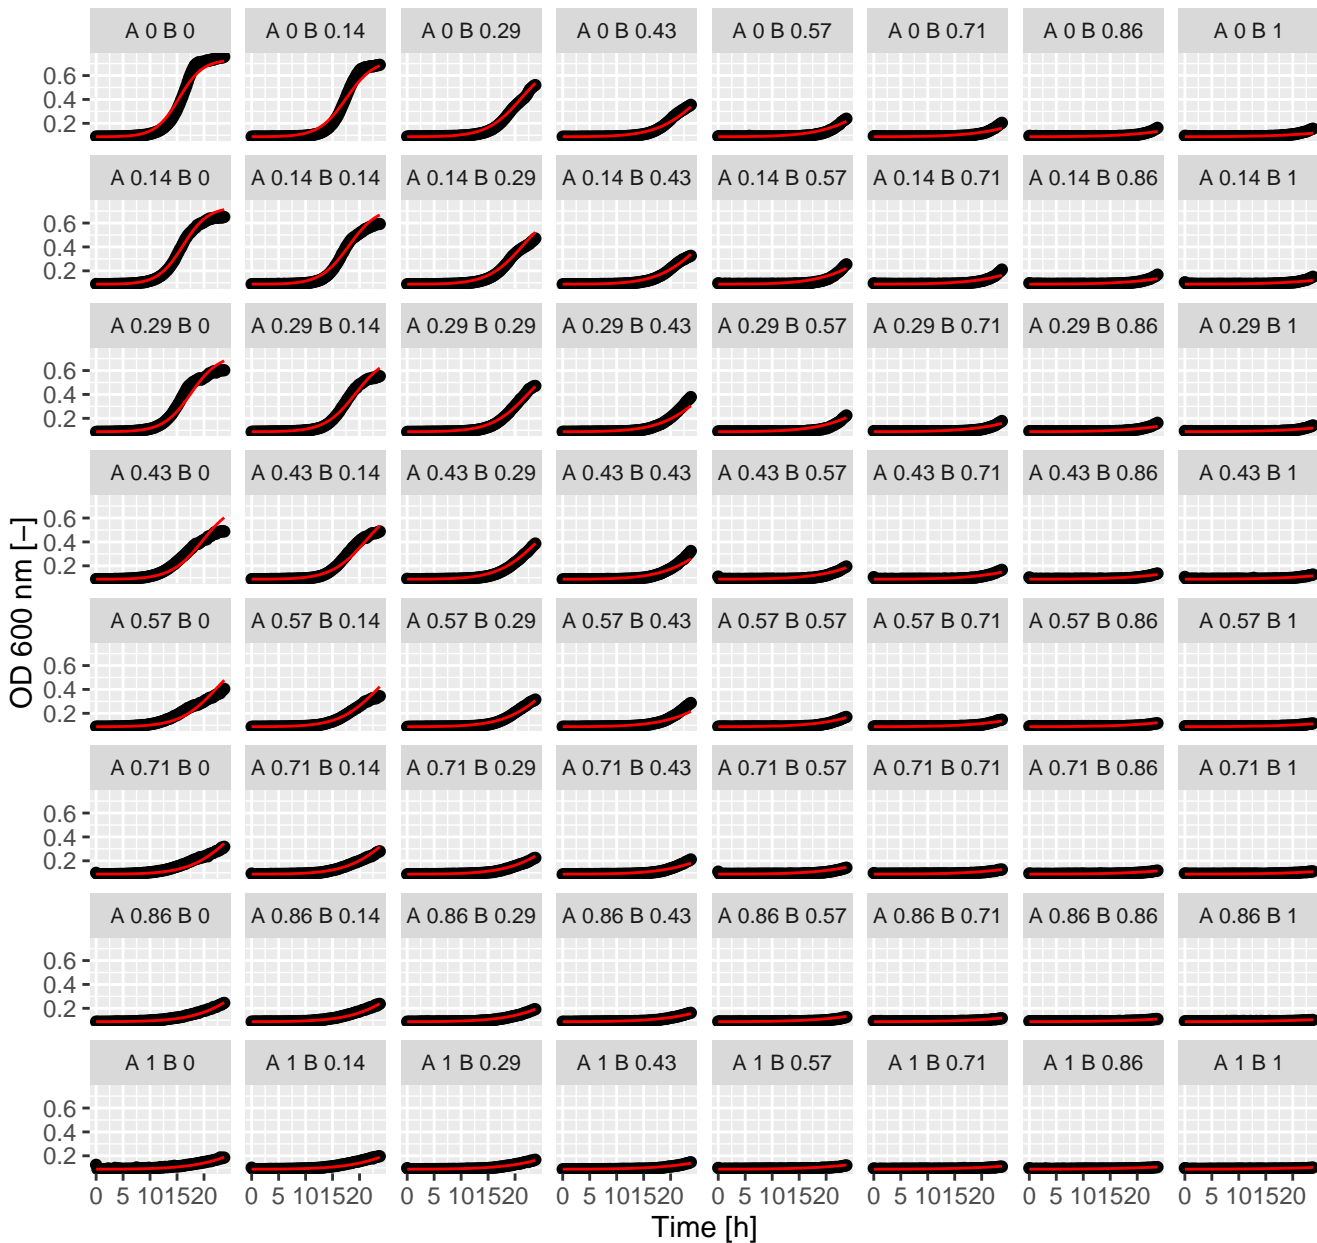

Met.Tac (= Ax.Bx) exp. additivity (BI)  
Int\_AB = 0 and Int\_BA = 0 at EC50

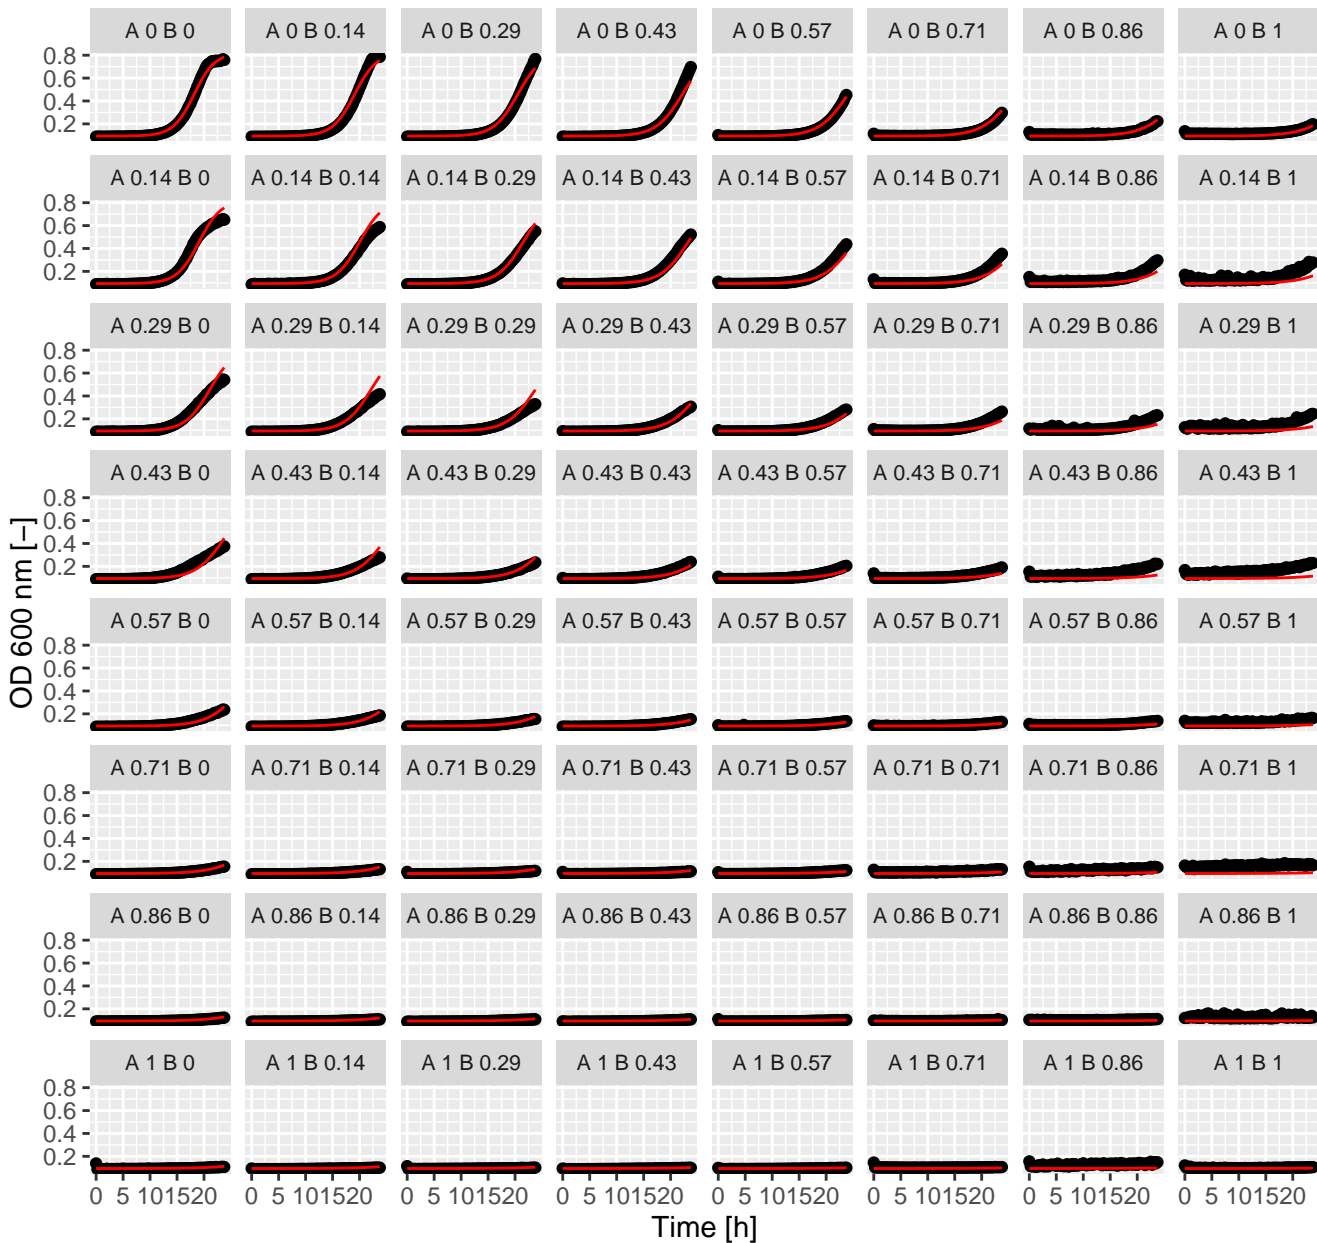

Met.Tac (= Ax.Bx) full GPDI  
Int\_AB = 0 and Int\_BA = 0.79 at EC50

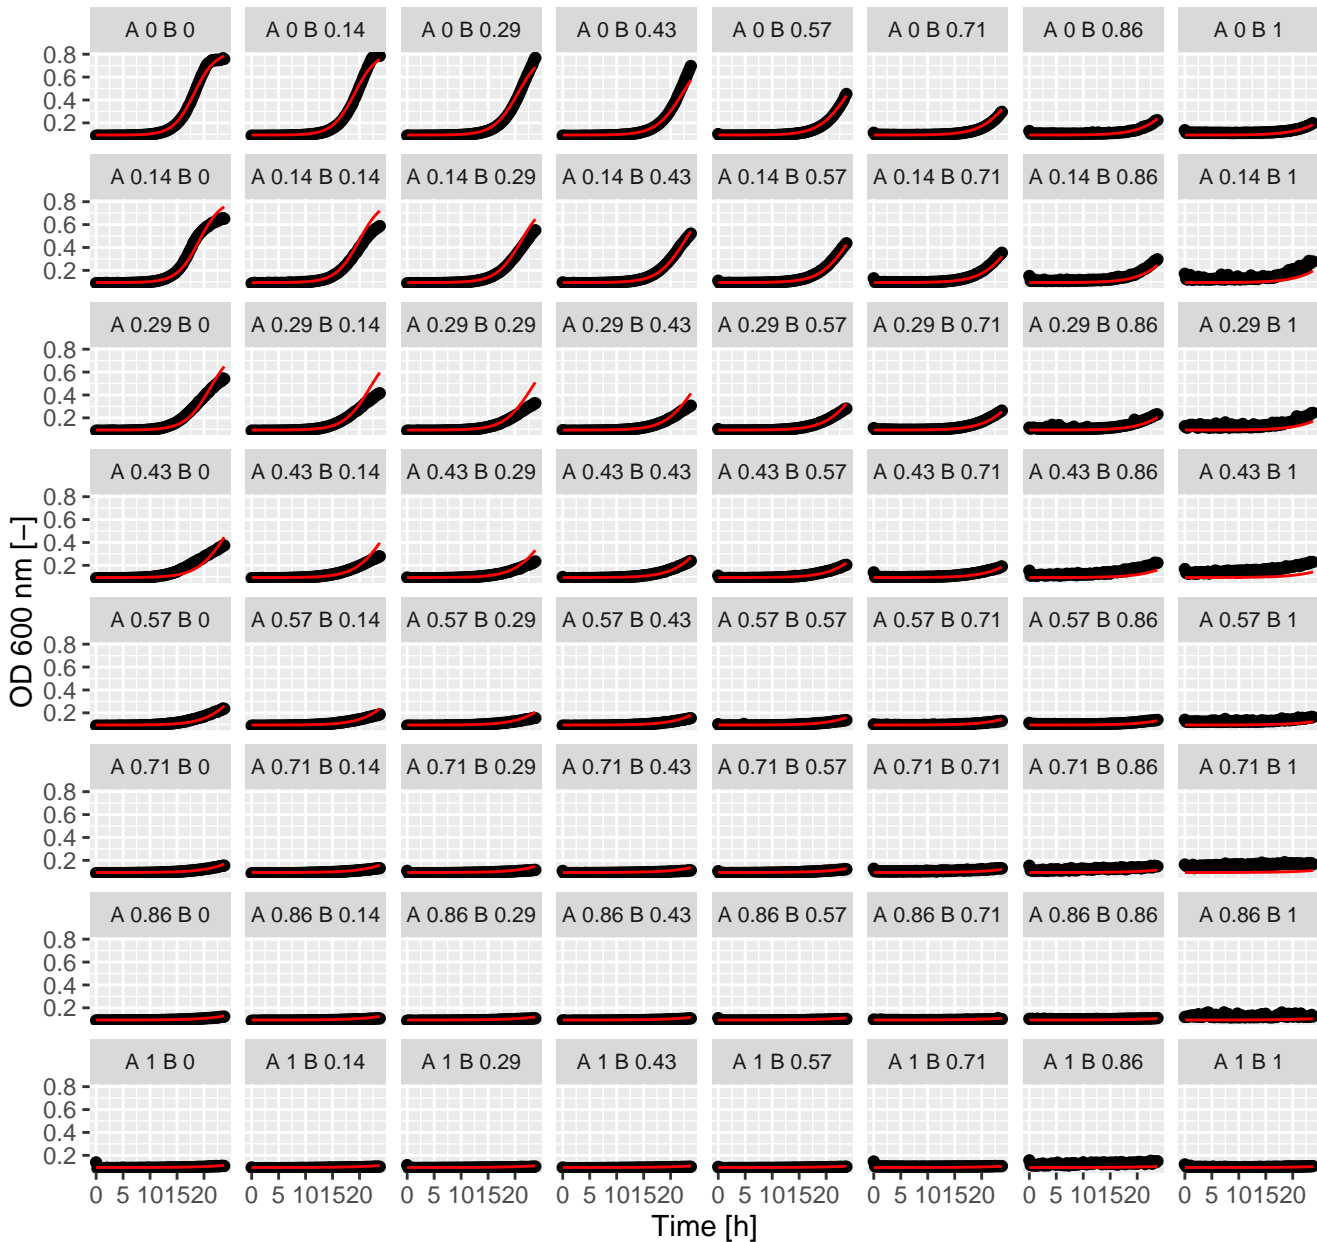

Met.Sta (= Ax.Bx) exp. additivity (BI)  
Int\_AB = 0 and Int\_BA = 0 at EC50

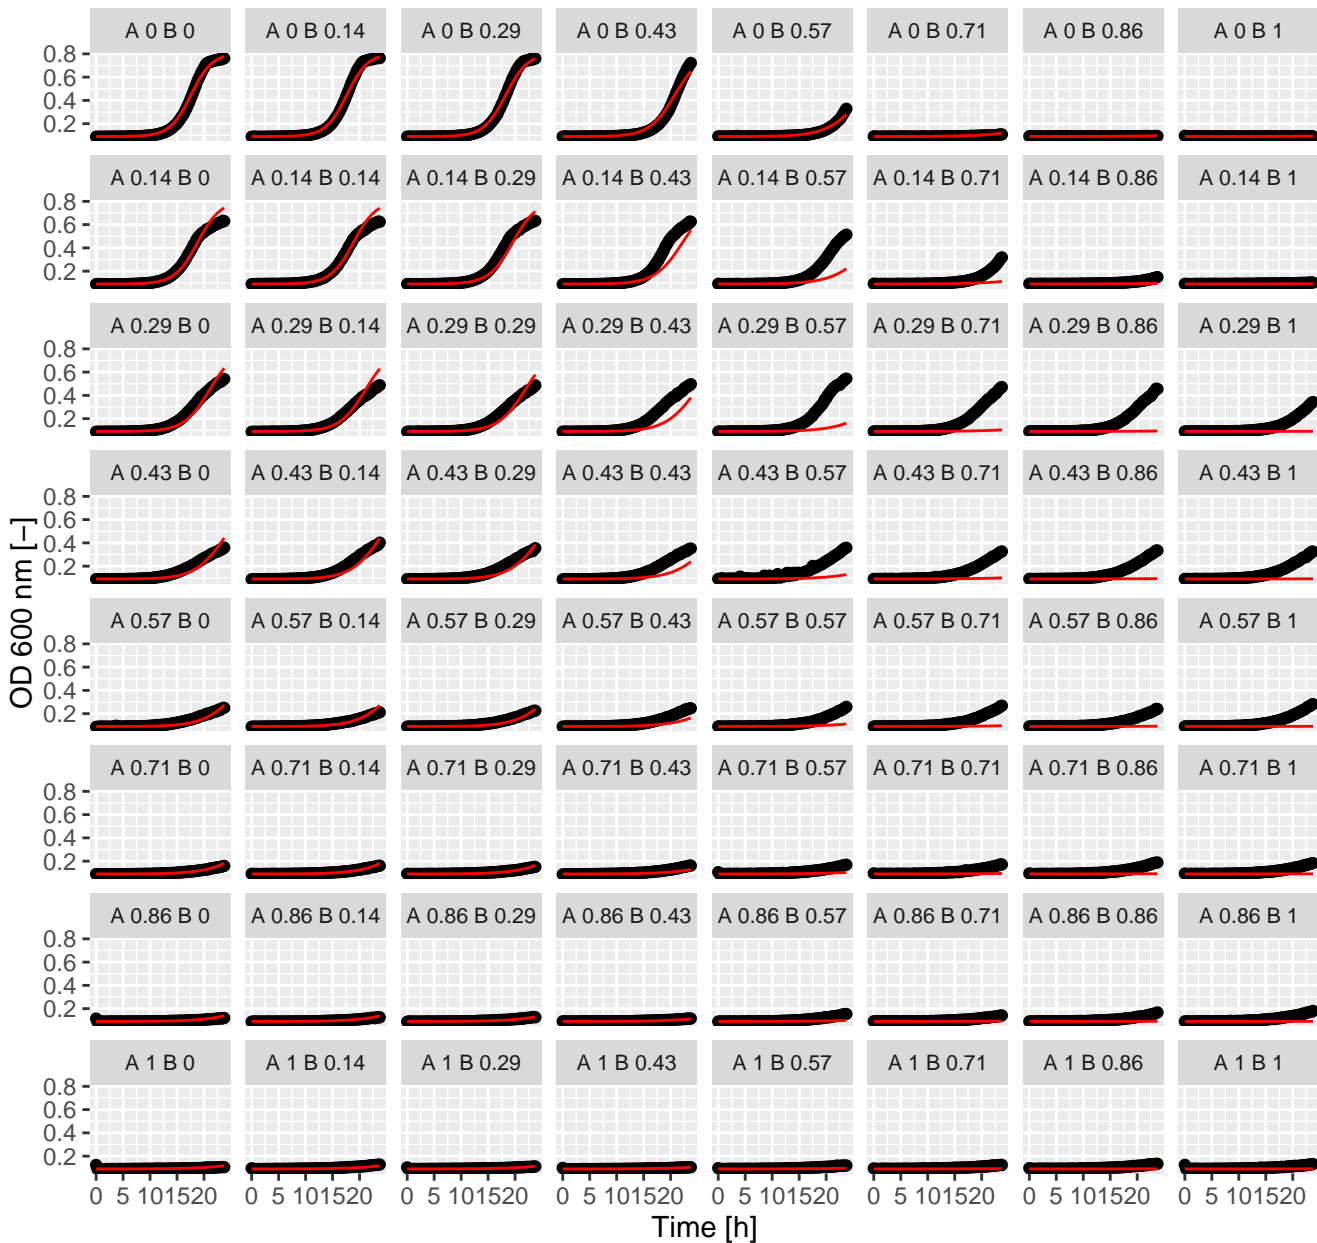

Met.Sta (= Ax.Bx) full GPDI  
Int\_AB = 0.06 and Int\_BA = 2.64 at EC50

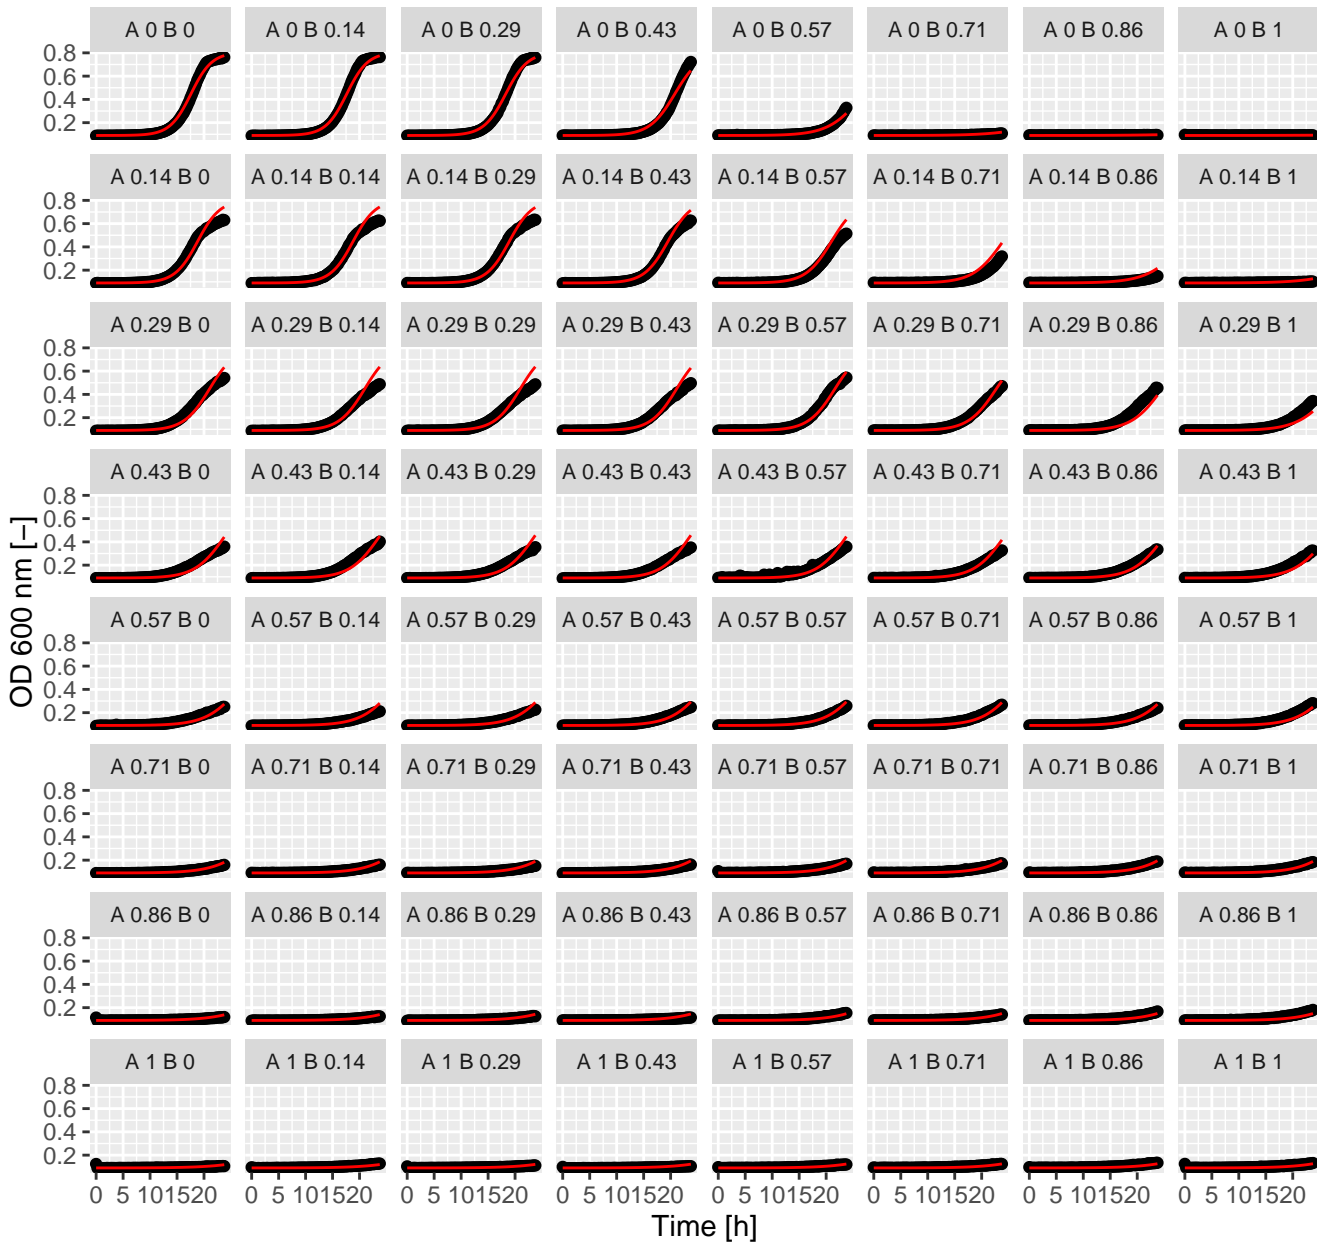



Met.Pen (= Ax.Bx) exp. additivity (BI)  
Int\_AB = 0 and Int\_BA = 0 at EC50

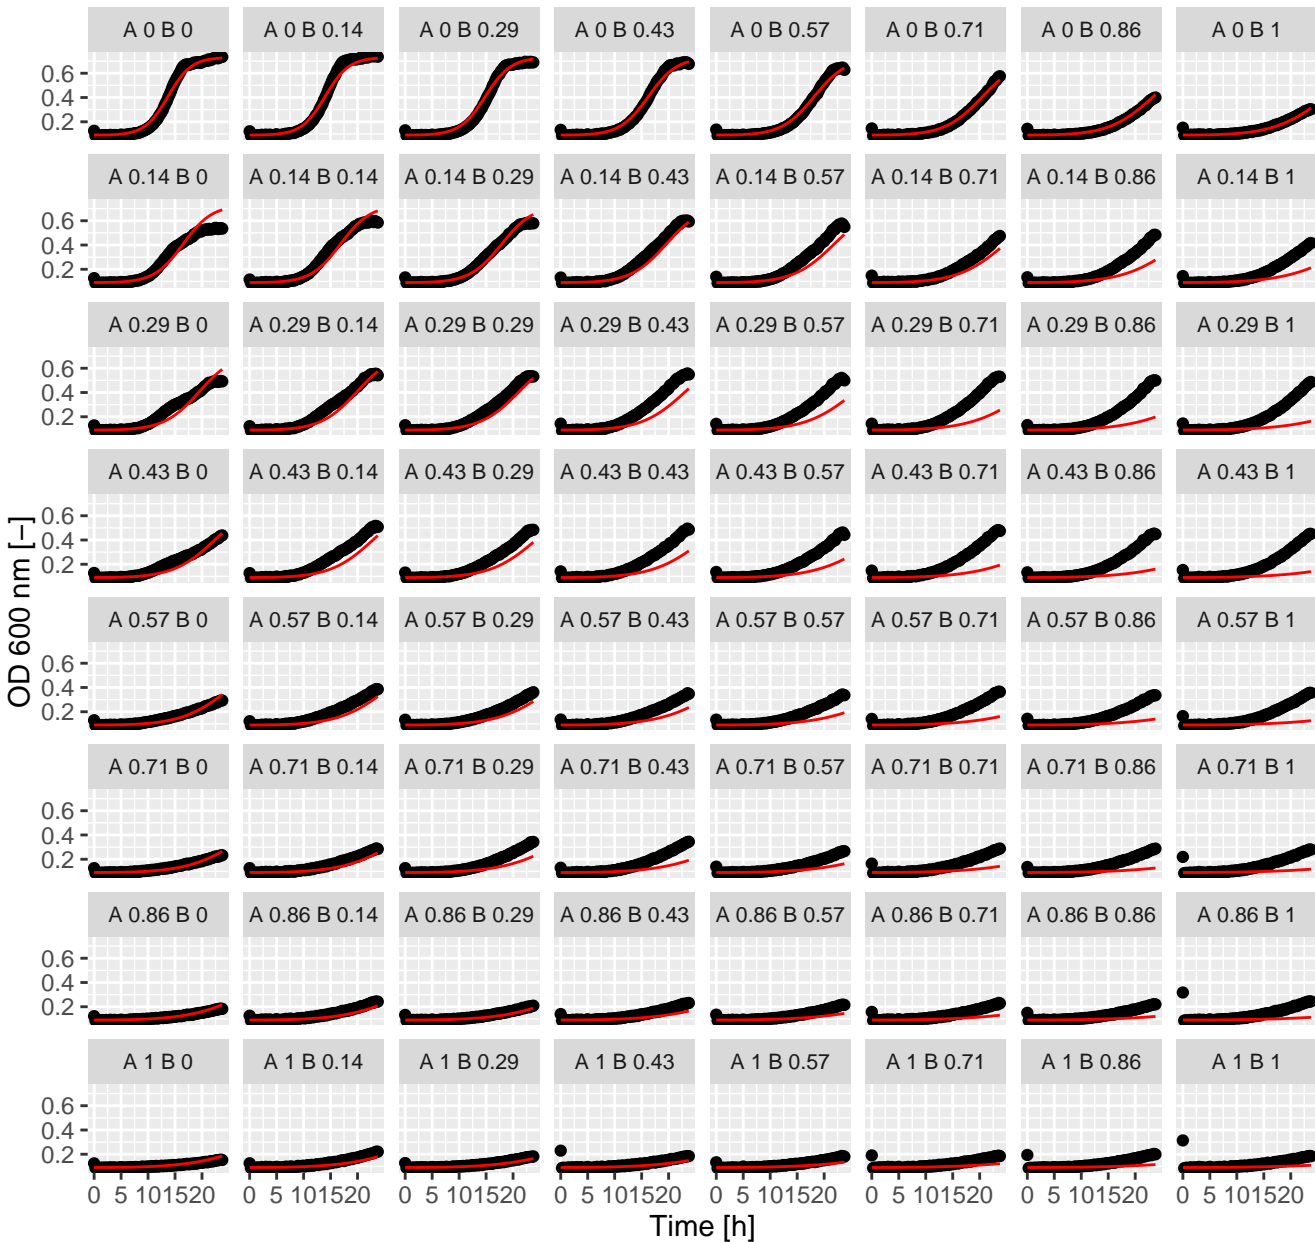

Met.Pen (= Ax.Bx) full GPDI  
 Int\_AB = 0.33 and Int\_BA = 1.71 at EC50

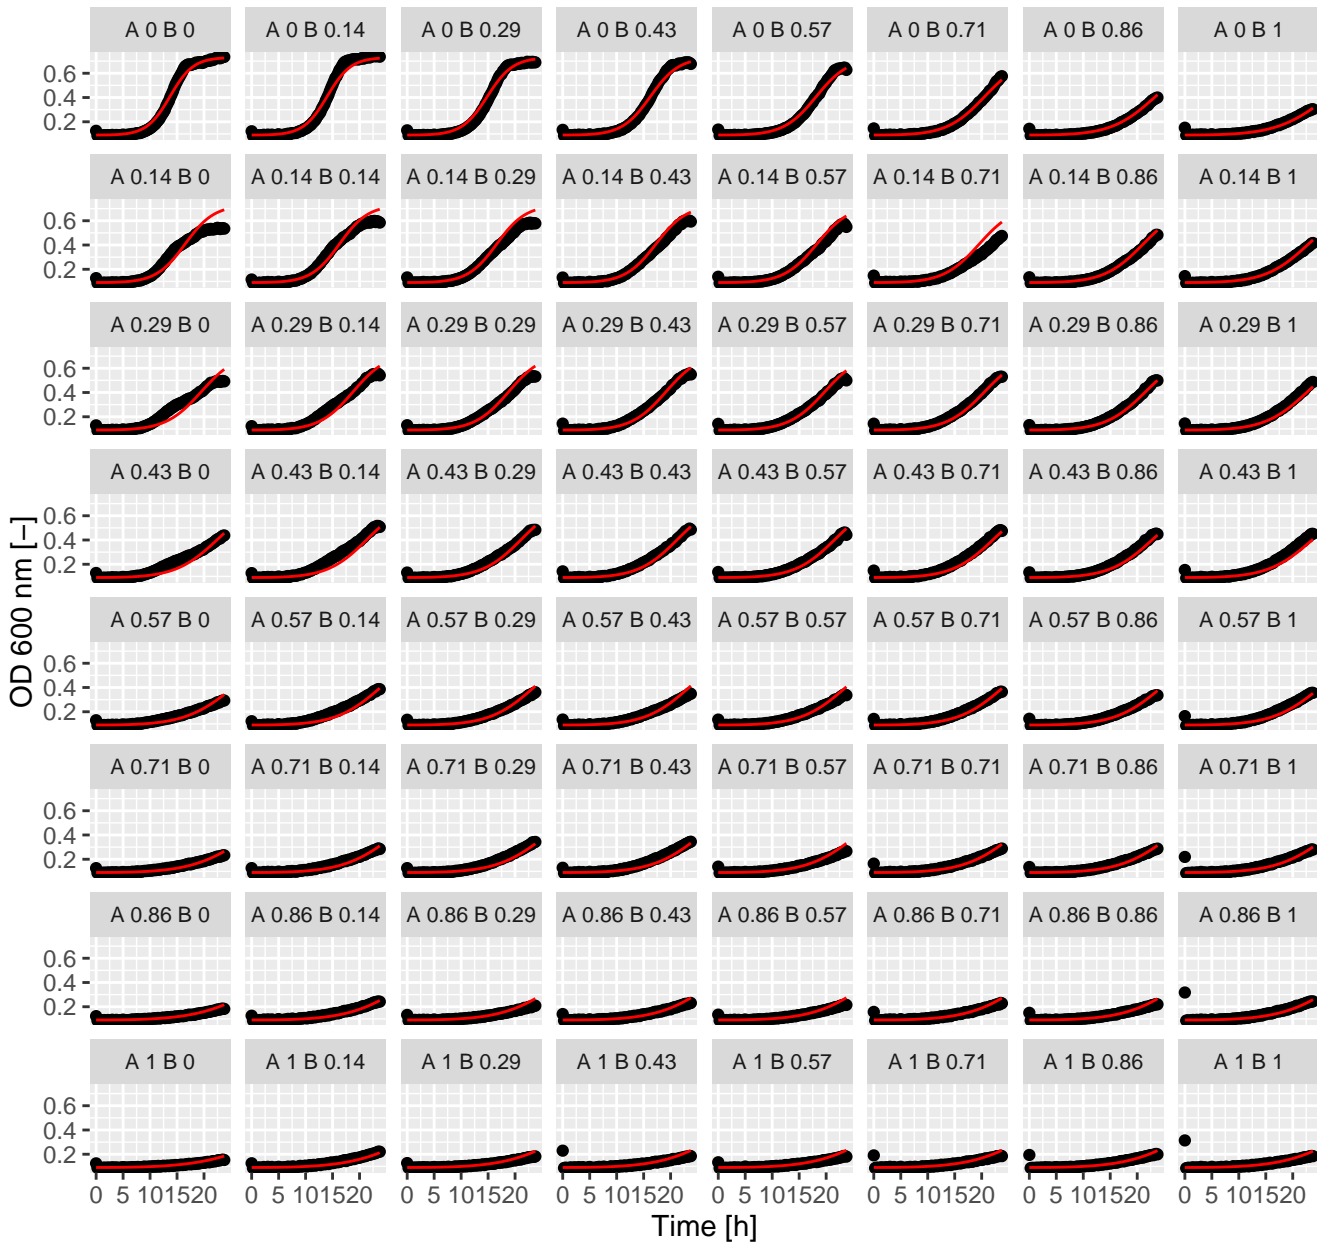

Met.Met (= Ax.Bx) exp. additivity (BI)  
 Int\_AB = 0 and Int\_BA = 0 at EC50

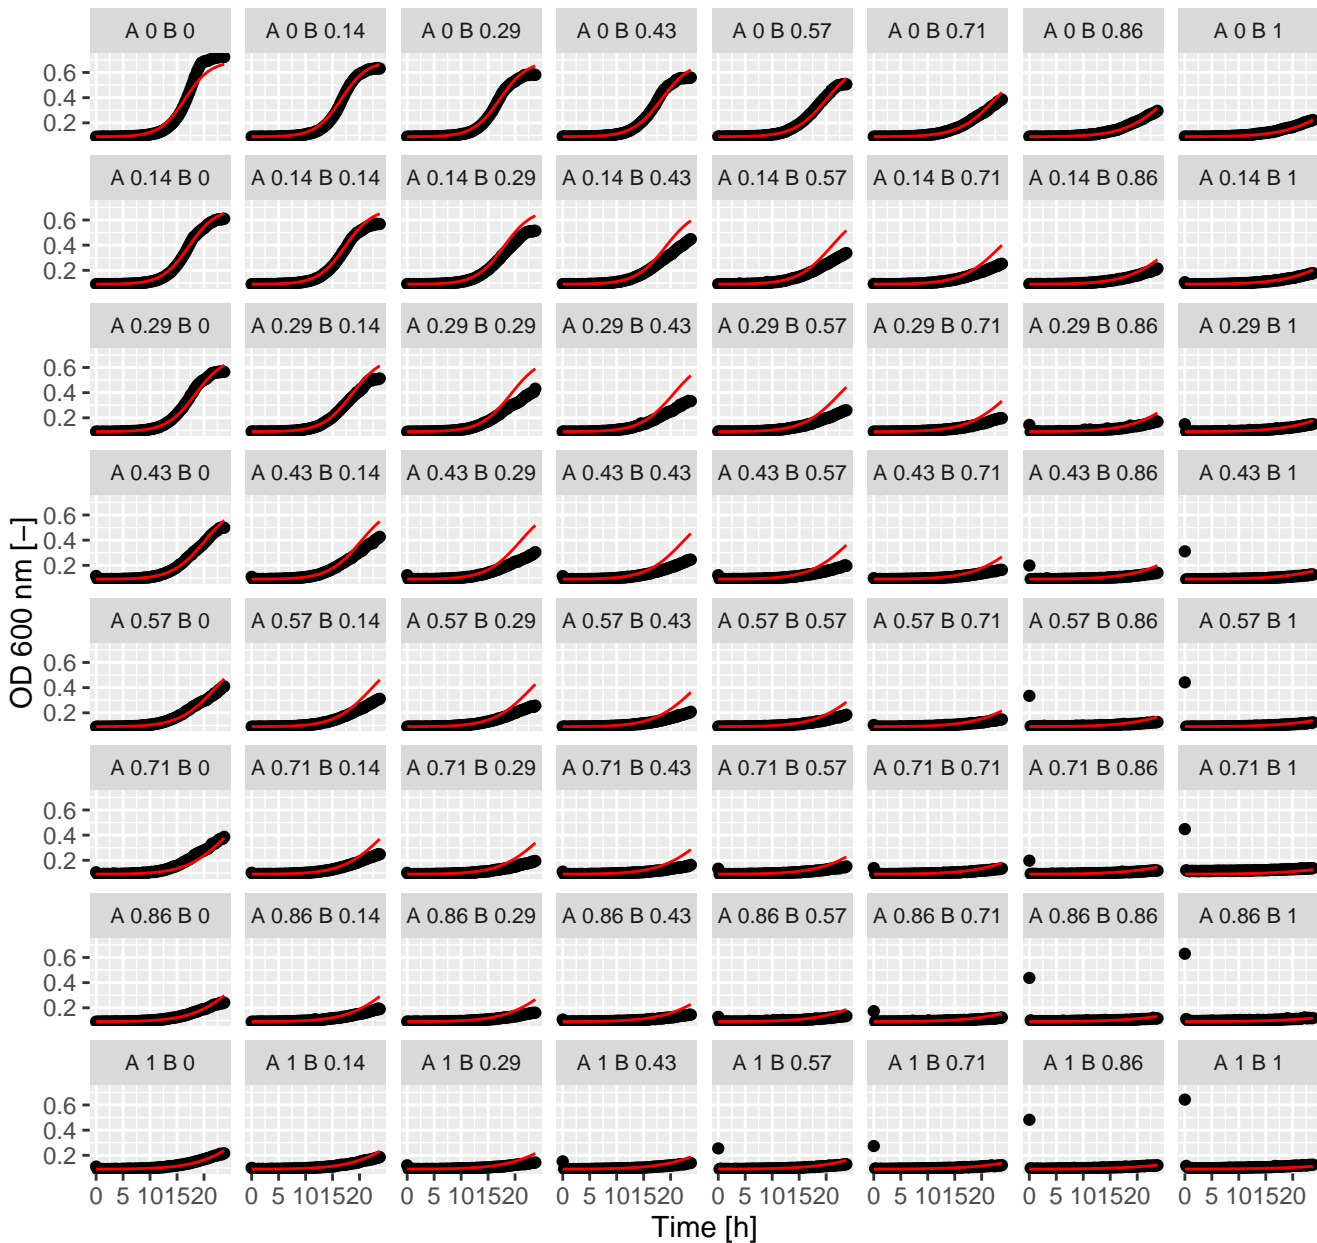

Met.Met (= Ax.Bx) full GPDI  
Int\_AB = -0.36 and Int\_BA = -0.17 at EC50

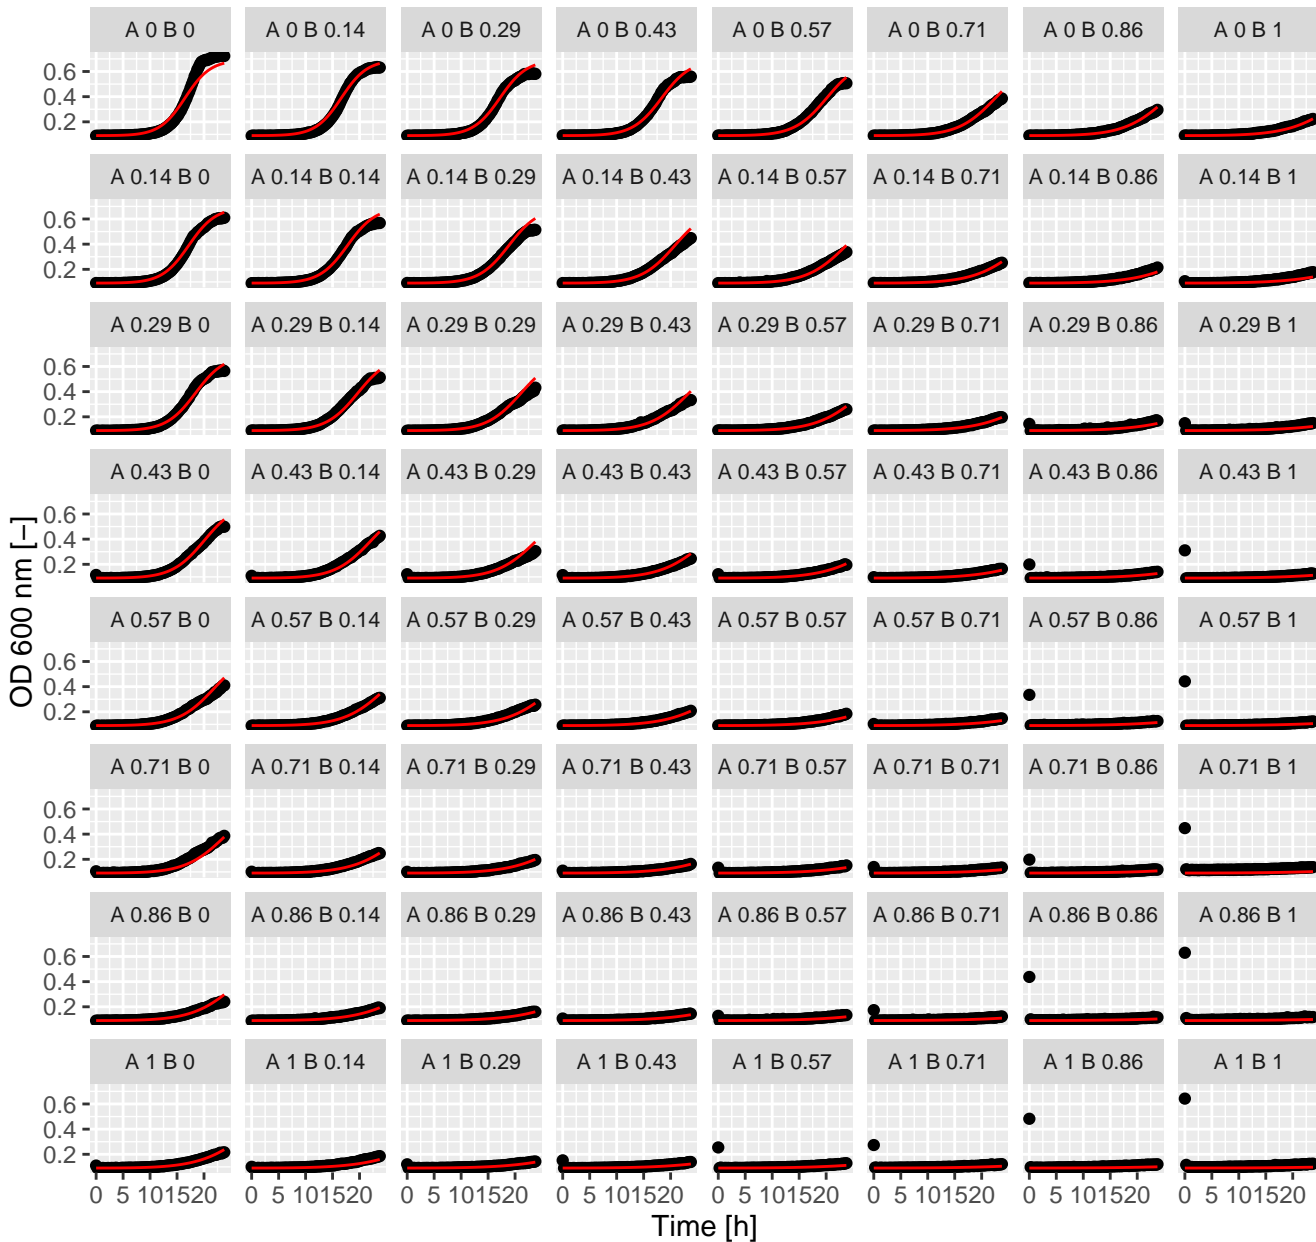

Lit.Tac (= Ax.Bx) exp. additivity (BI)  
Int\_AB = 0 and Int\_BA = 0 at EC50

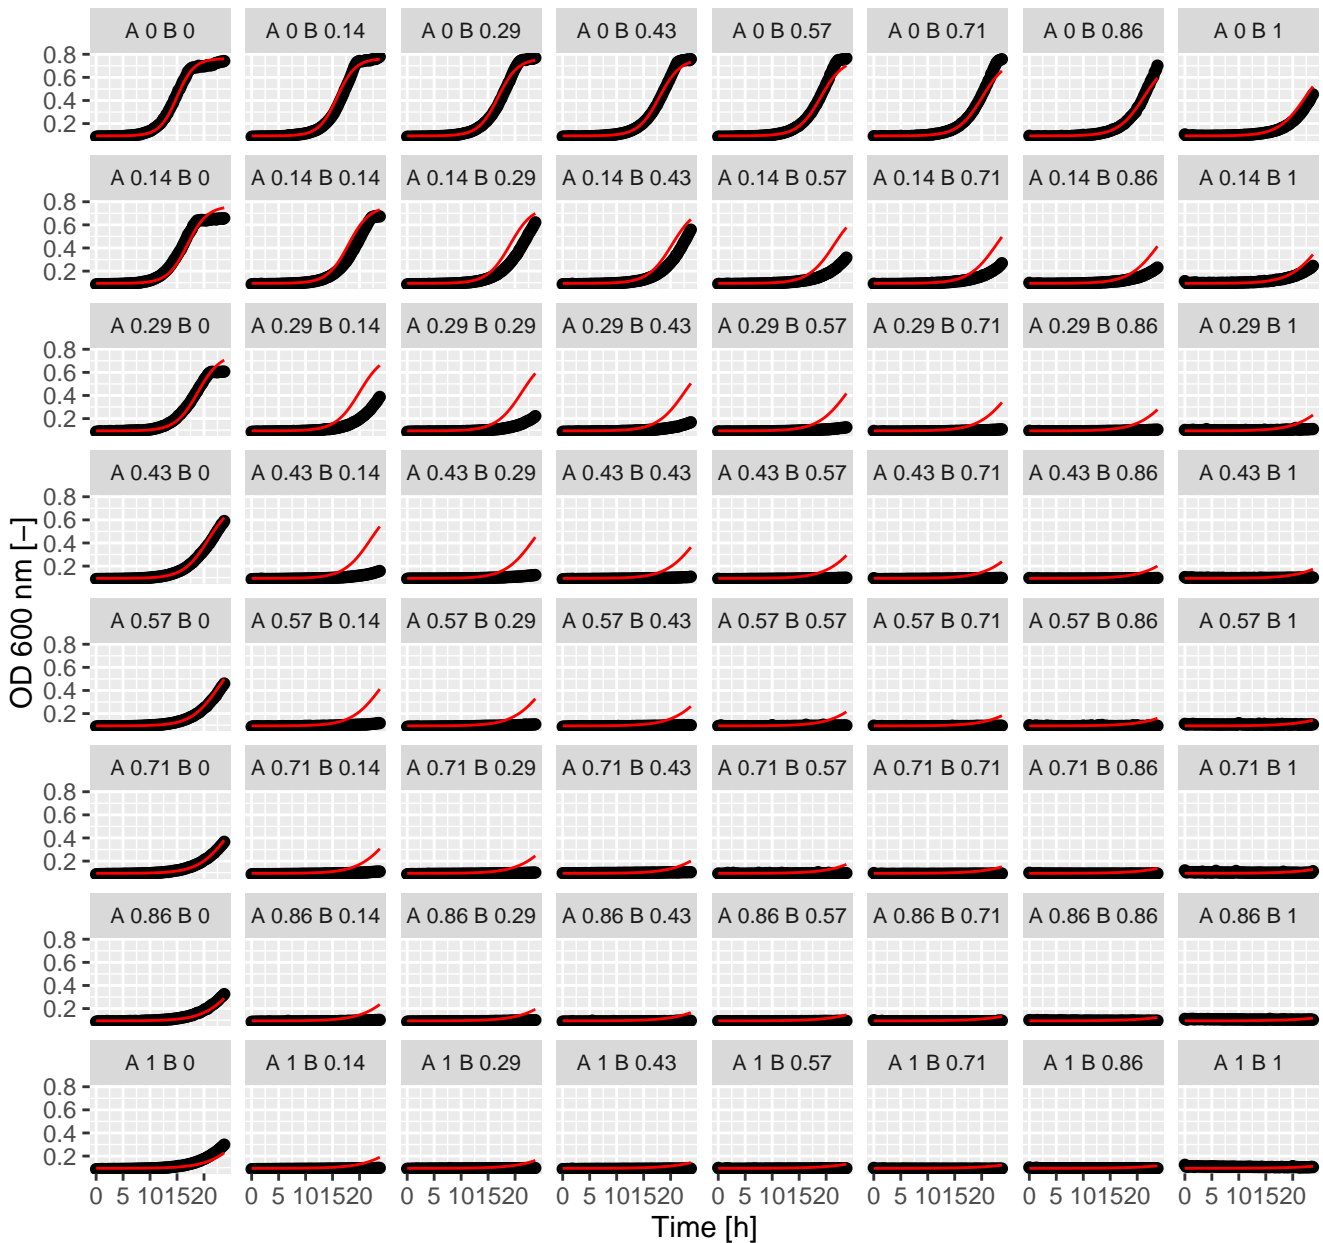

Lit.Tac (= Ax.Bx) full GPDI  
Int\_AB = -0.89 and Int\_BA = 4629219.49 at EC50

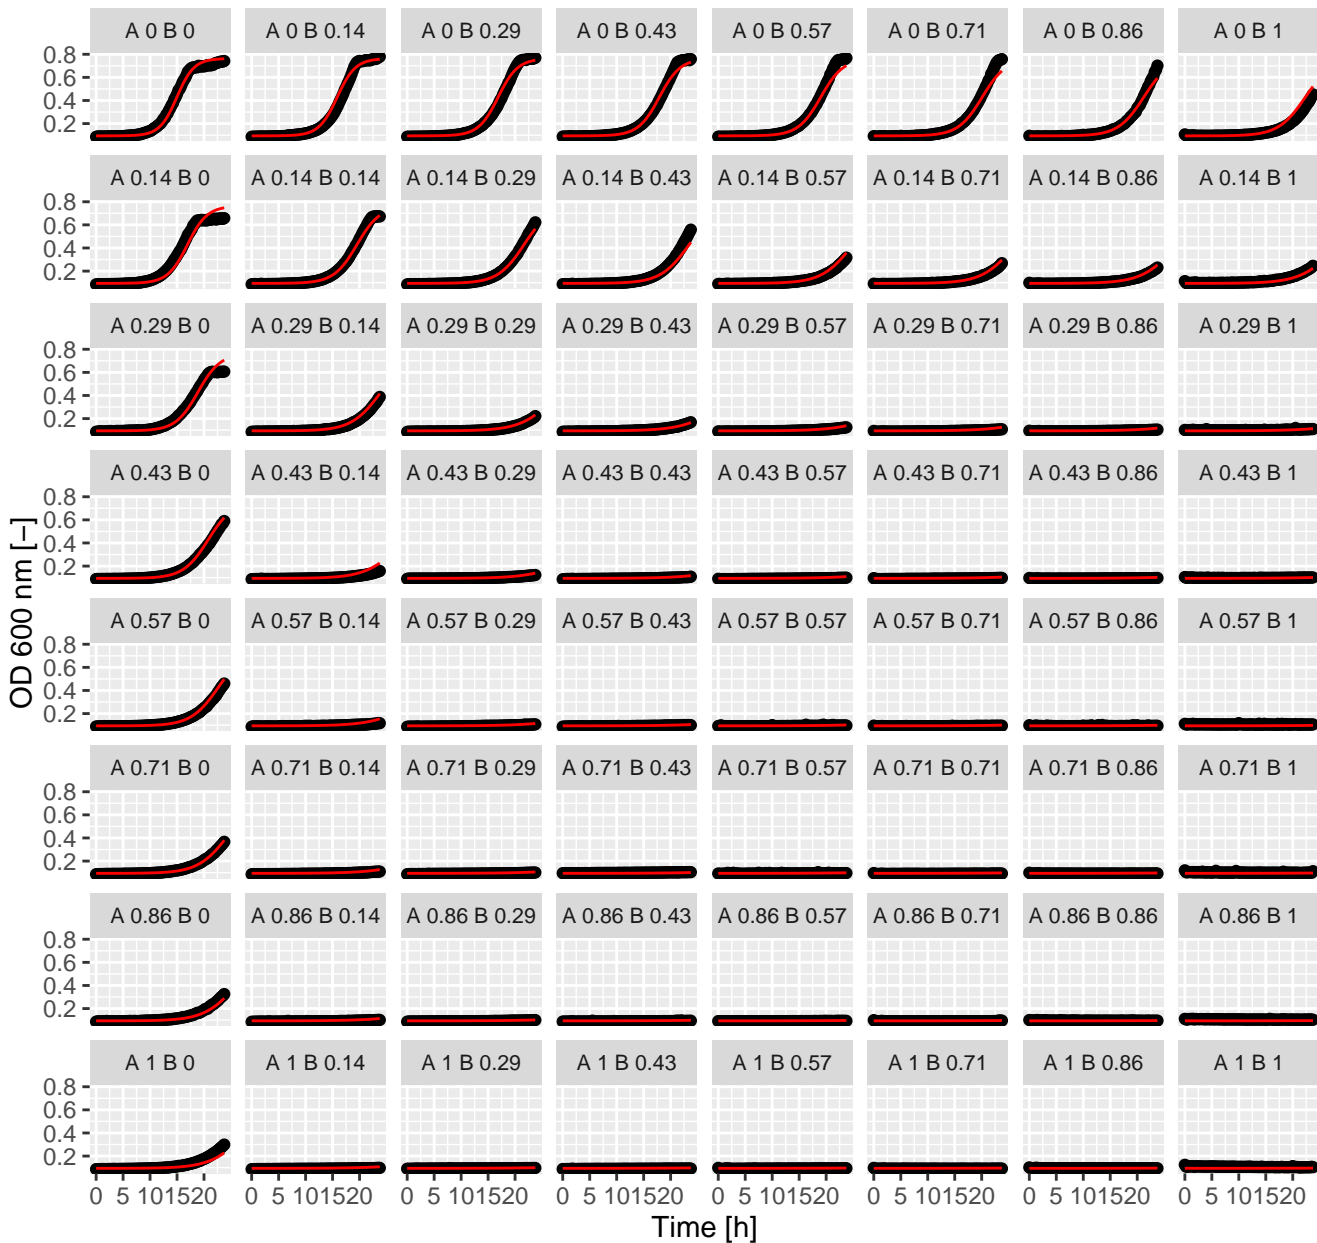

Lit.Sta (= Ax.Bx) exp. additivity (BI)  
Int\_AB = 0 and Int\_BA = 0 at EC50

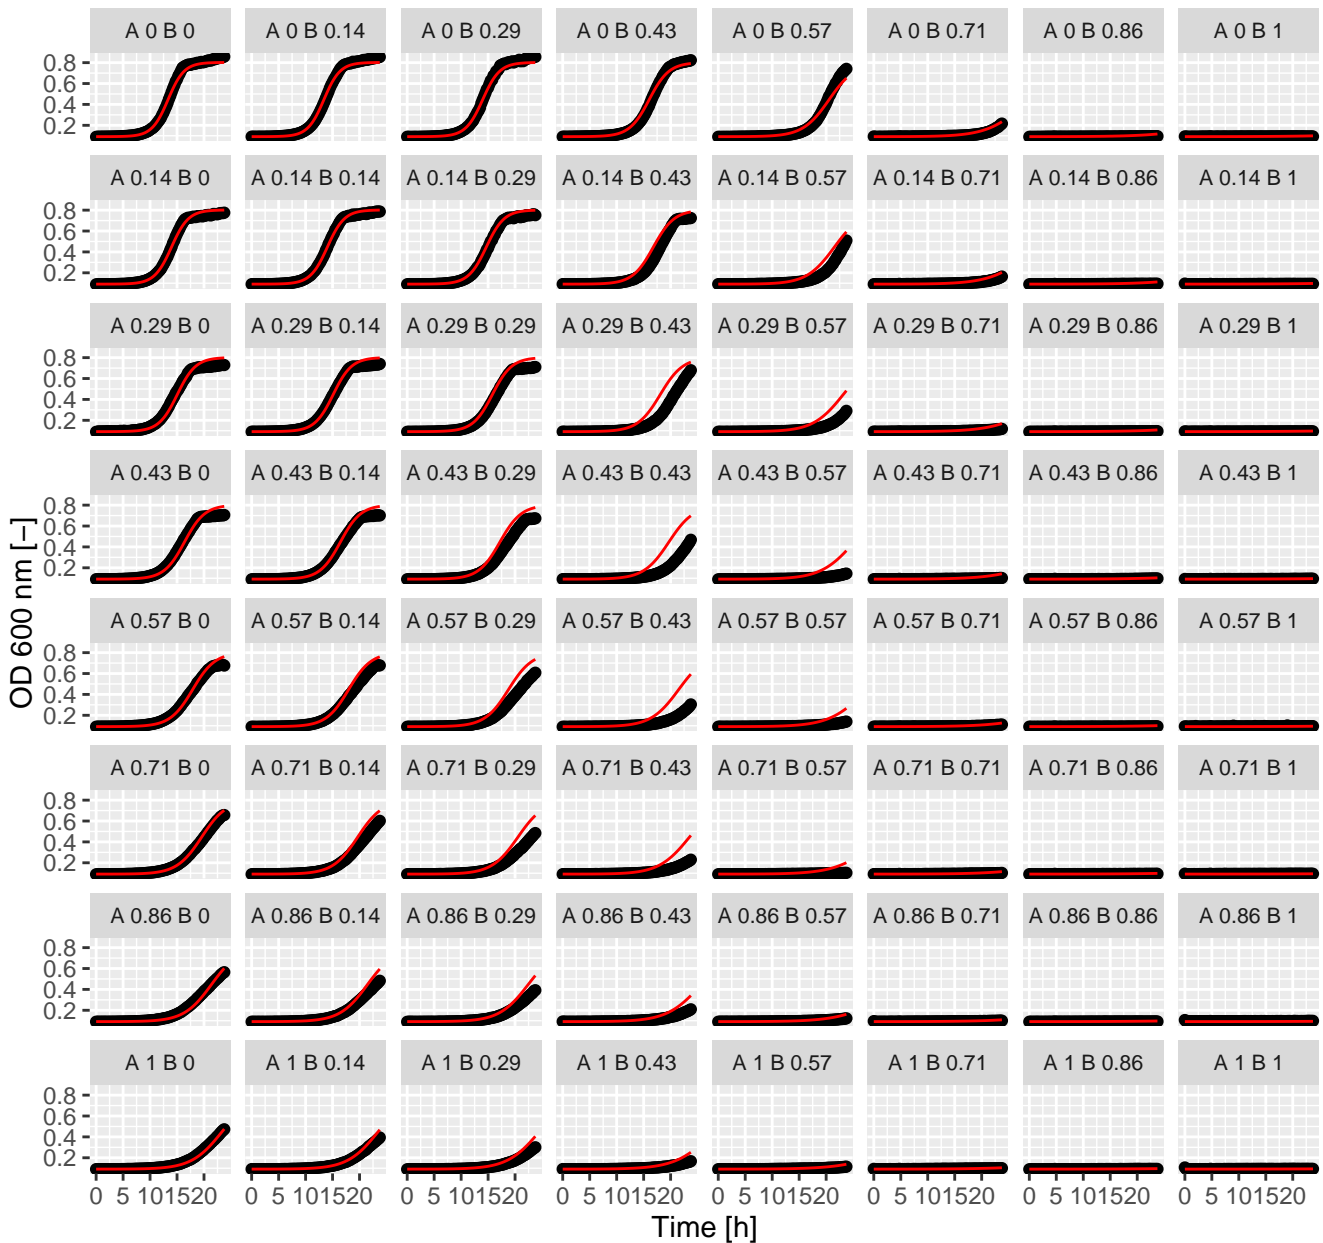

Lit.Sta (= Ax.Bx) full GPDI  
Int\_AB = -0.14 and Int\_BA = -0.22 at EC50

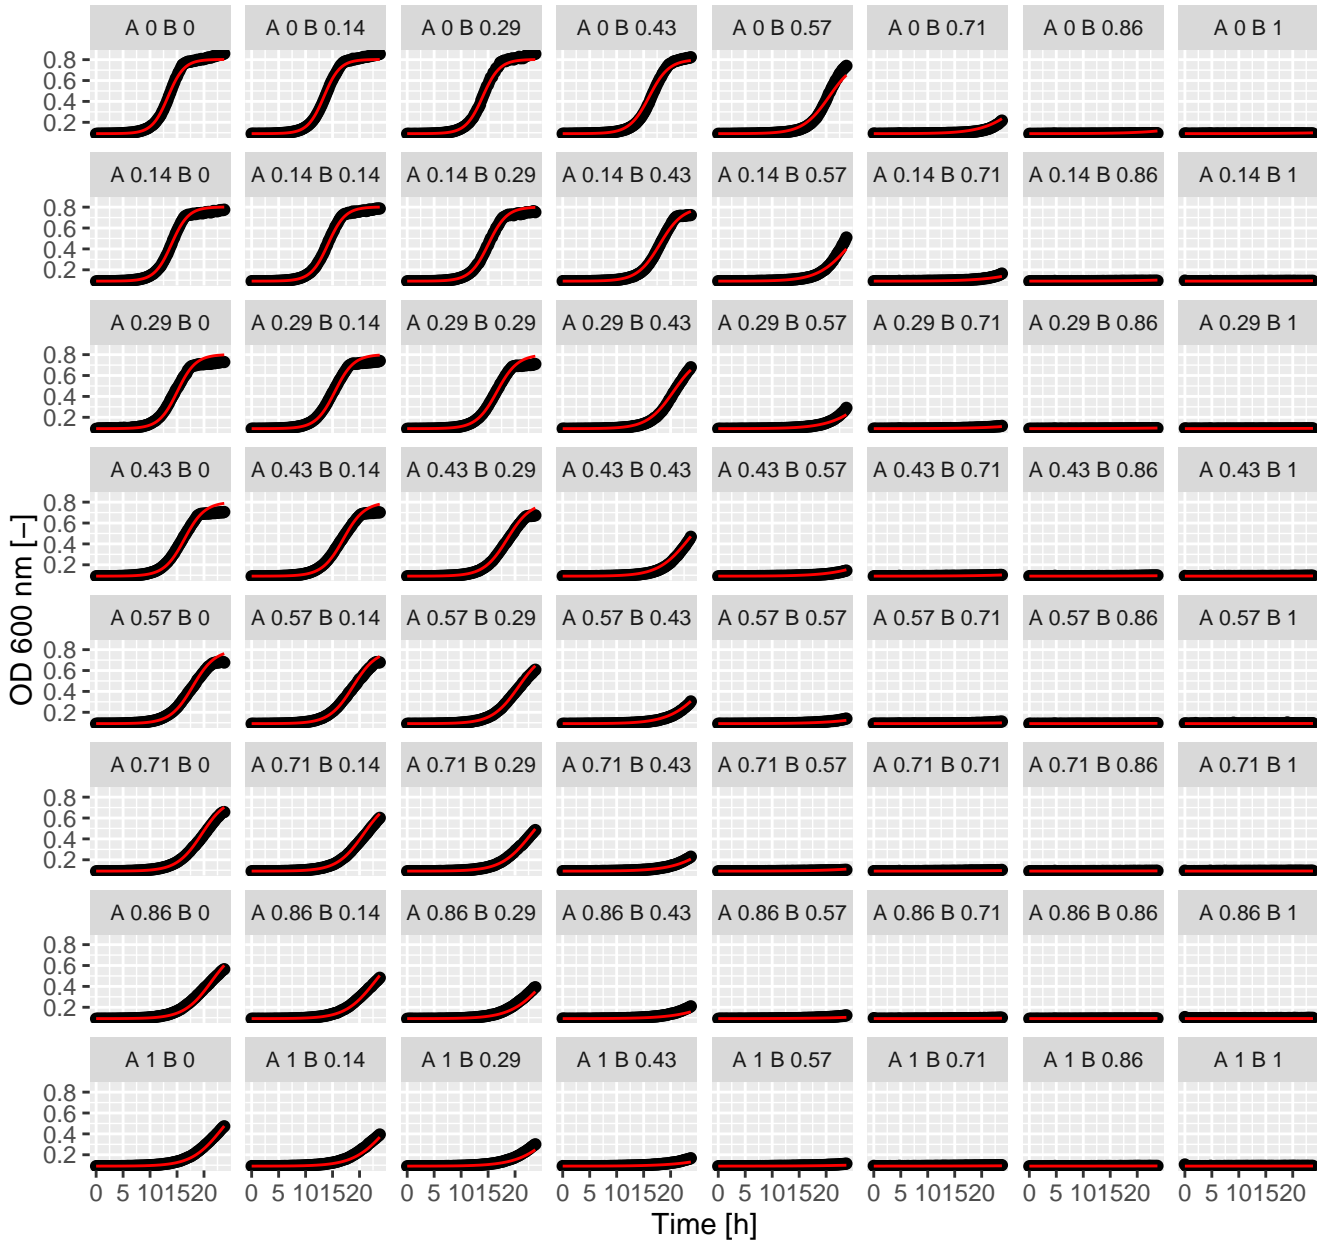



Lit.Rap (= Ax.Bx) exp. additivity (BI)  
Int\_AB = 0 and Int\_BA = 0 at EC50

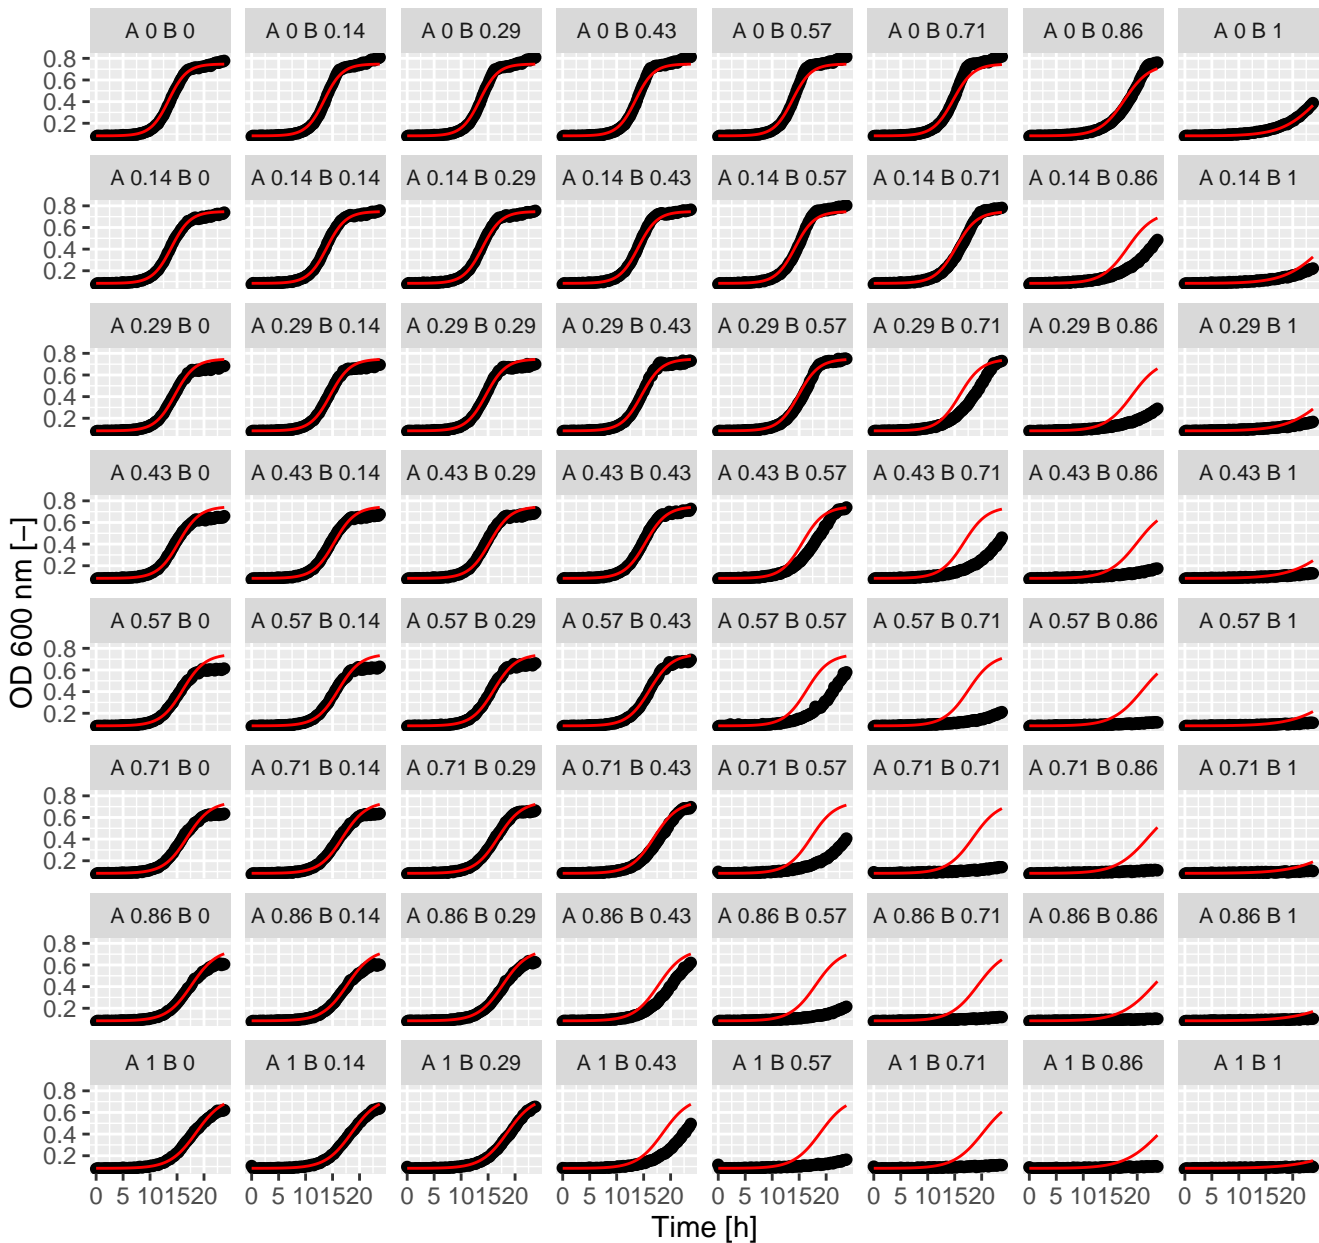

Lit.Rap (= Ax.Bx) full GPDI  
Int\_AB = -0.09 and Int\_BA = -0.59 at EC50

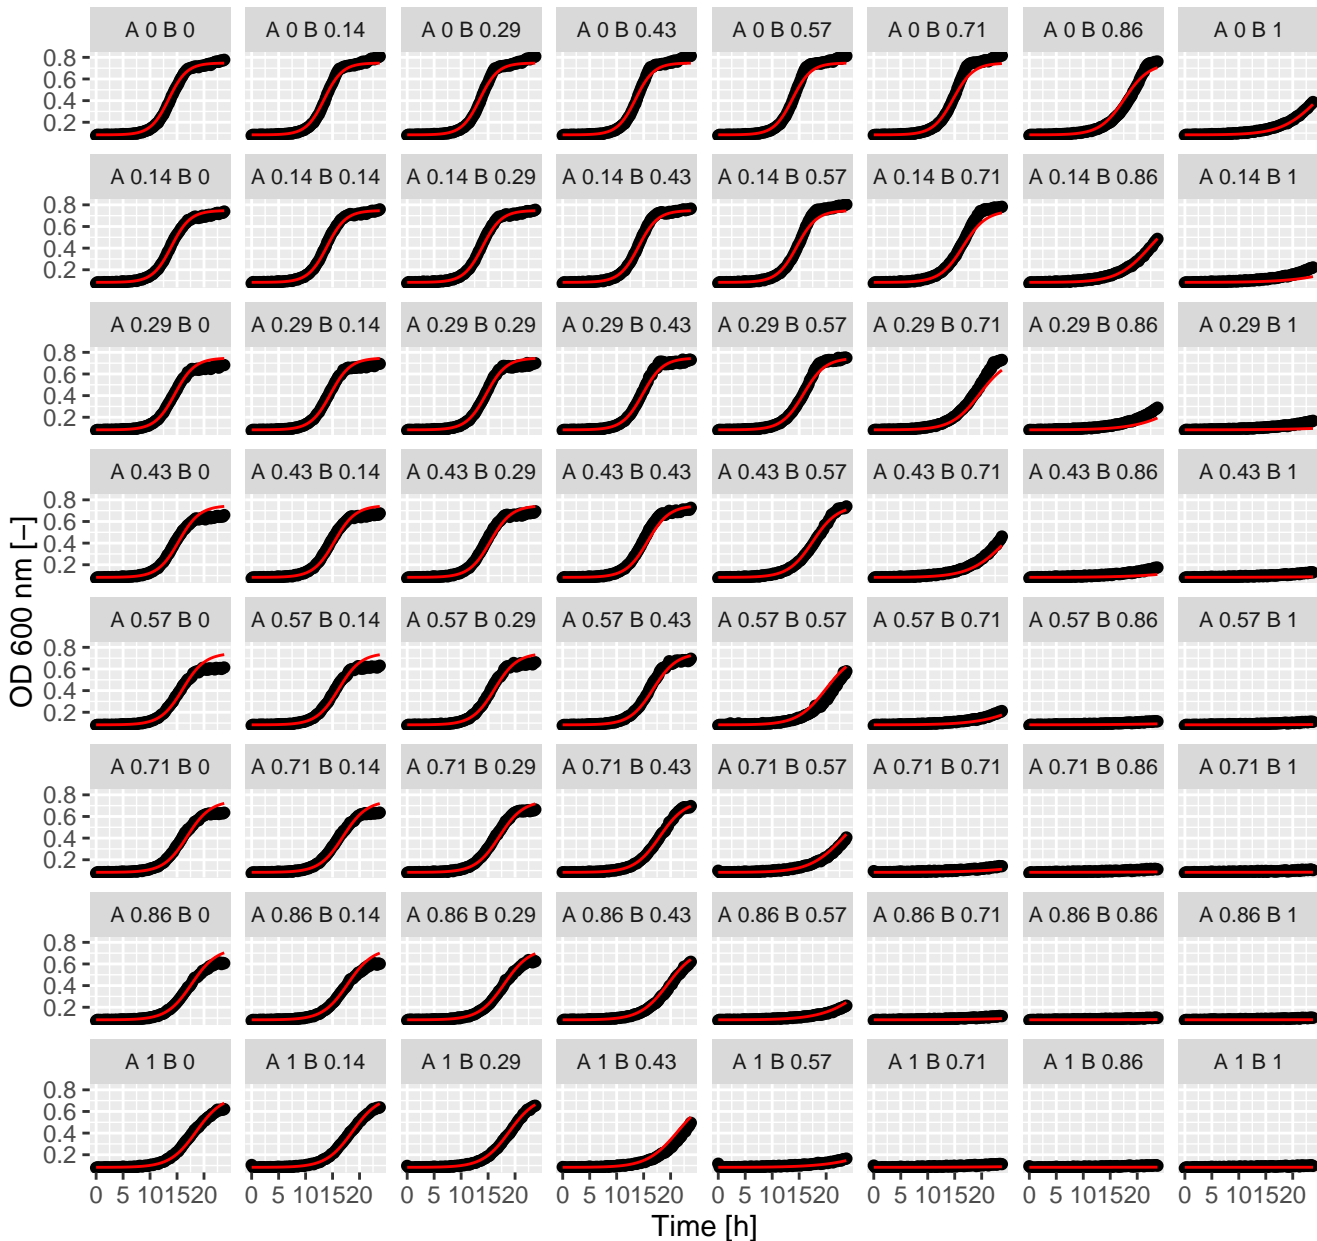

Lit.Rad (= Ax.Bx) exp. additivity (BI)  
Int\_AB = 0 and Int\_BA = 0 at EC50

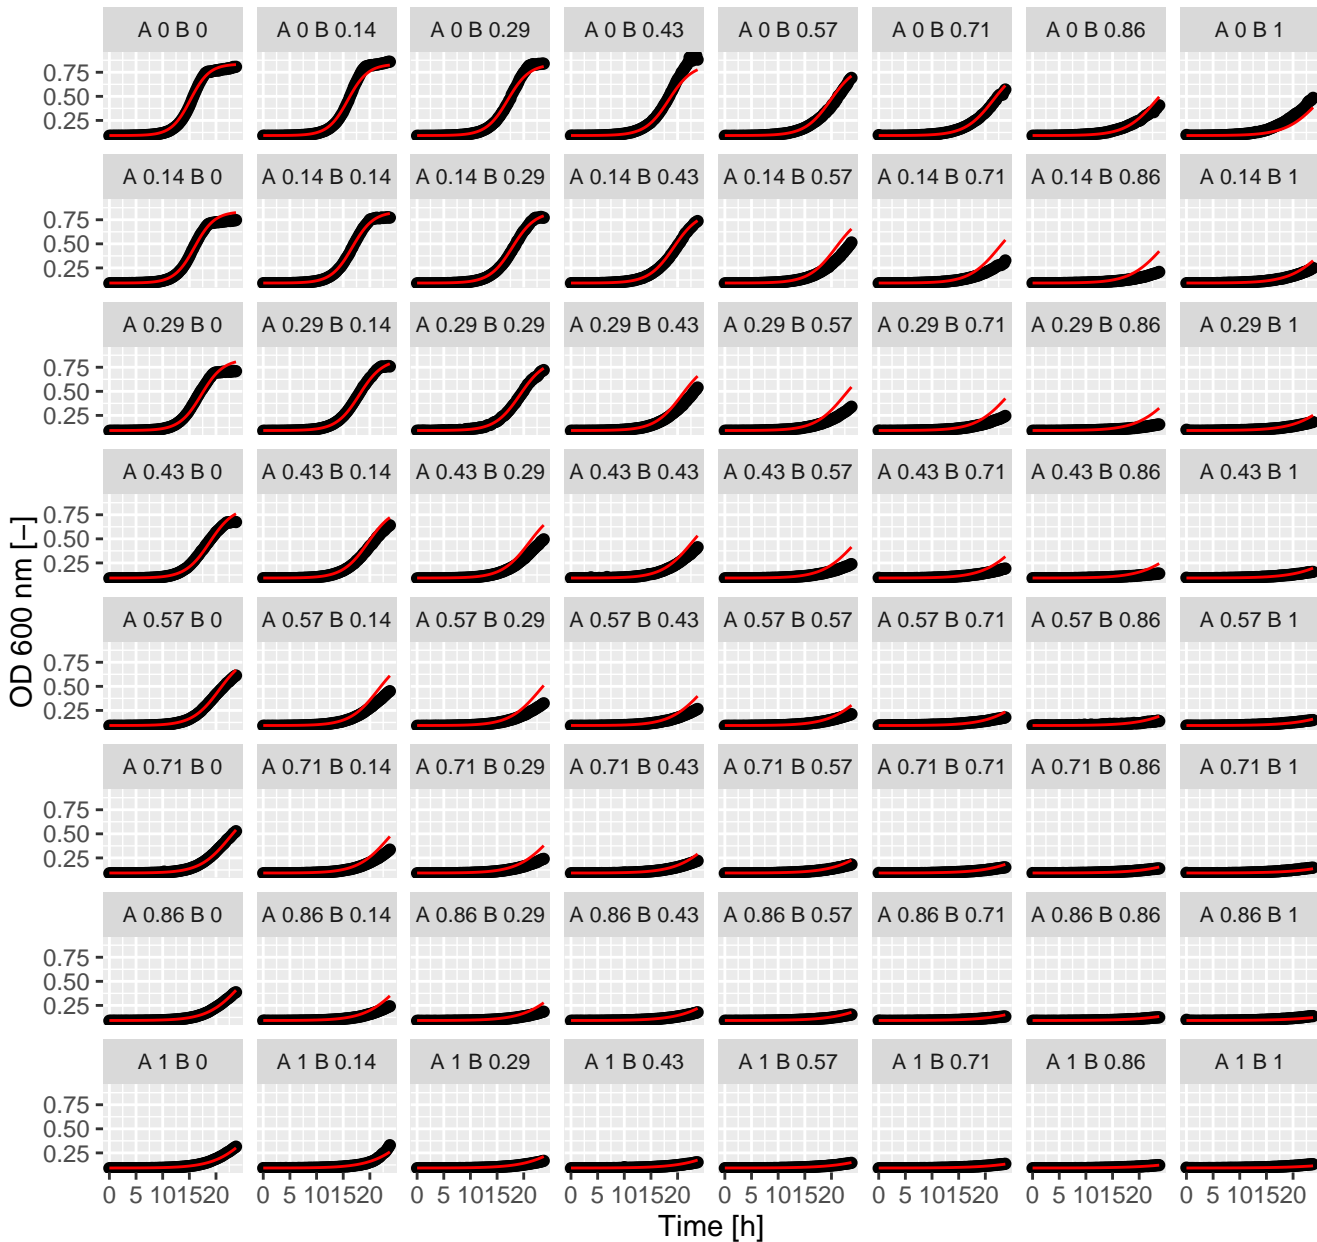

Lit.Rad (= Ax.Bx) full GPDI  
Int\_AB = -0.09 and Int\_BA = -0.23 at EC50

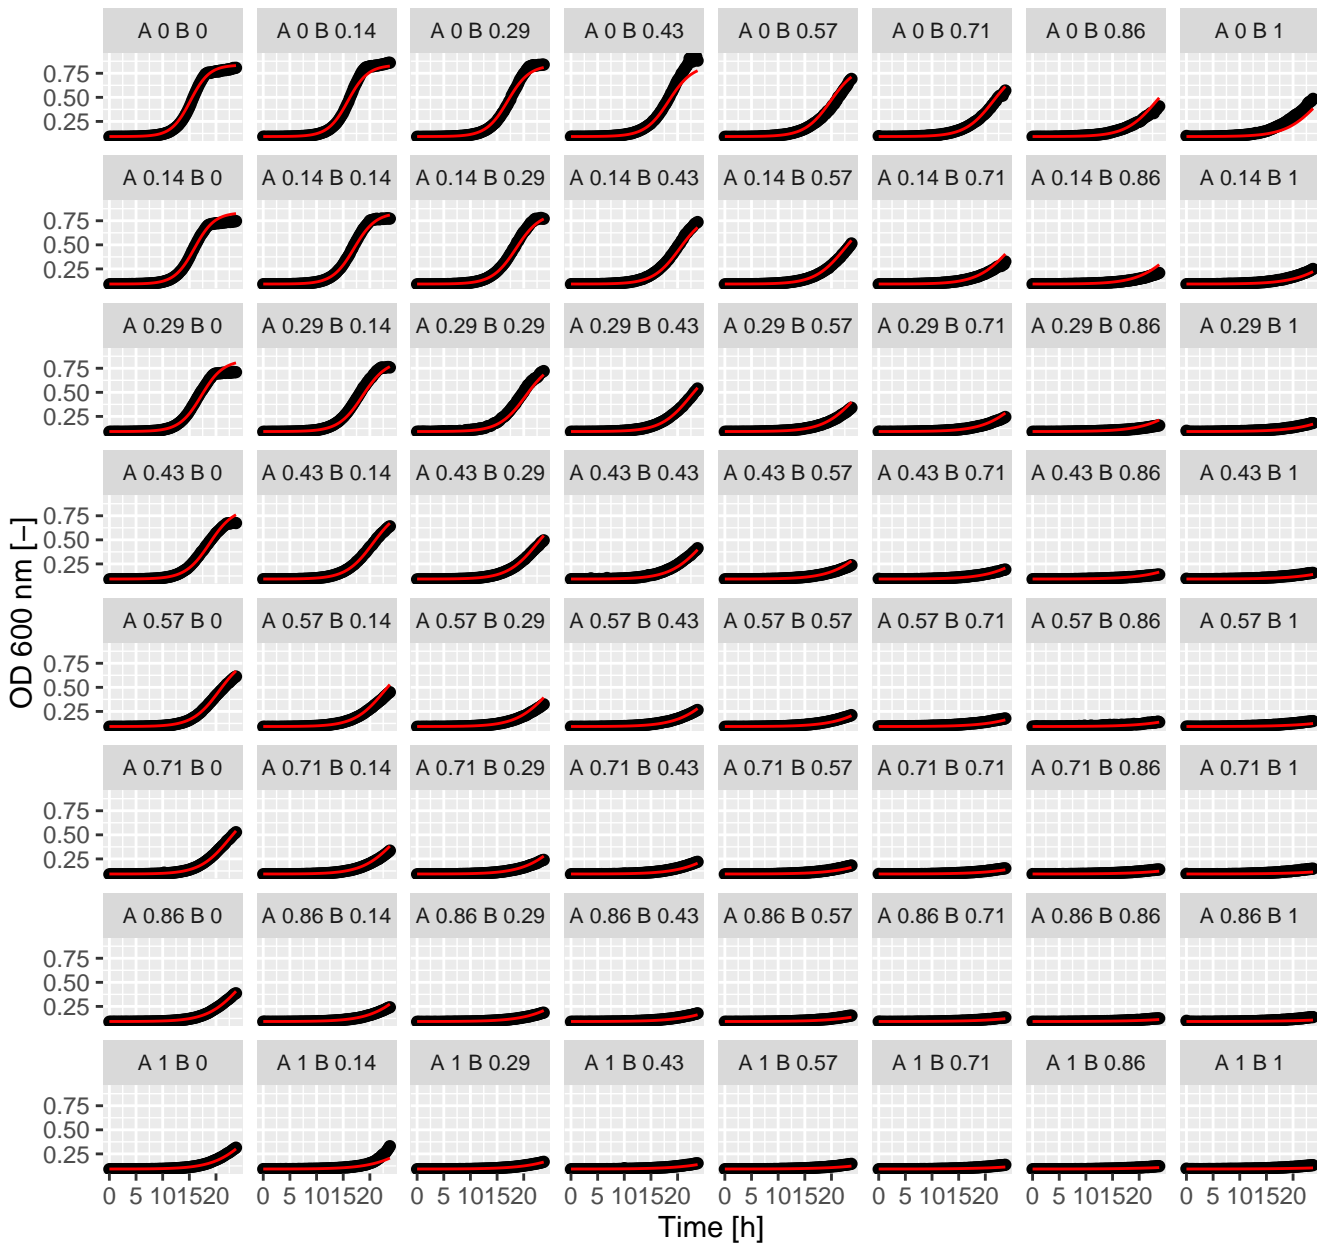

Lat.Tun (= Ax.Bx) exp. additivity (BI)  
 Int\_AB = 0 and Int\_BA = 0 at EC50

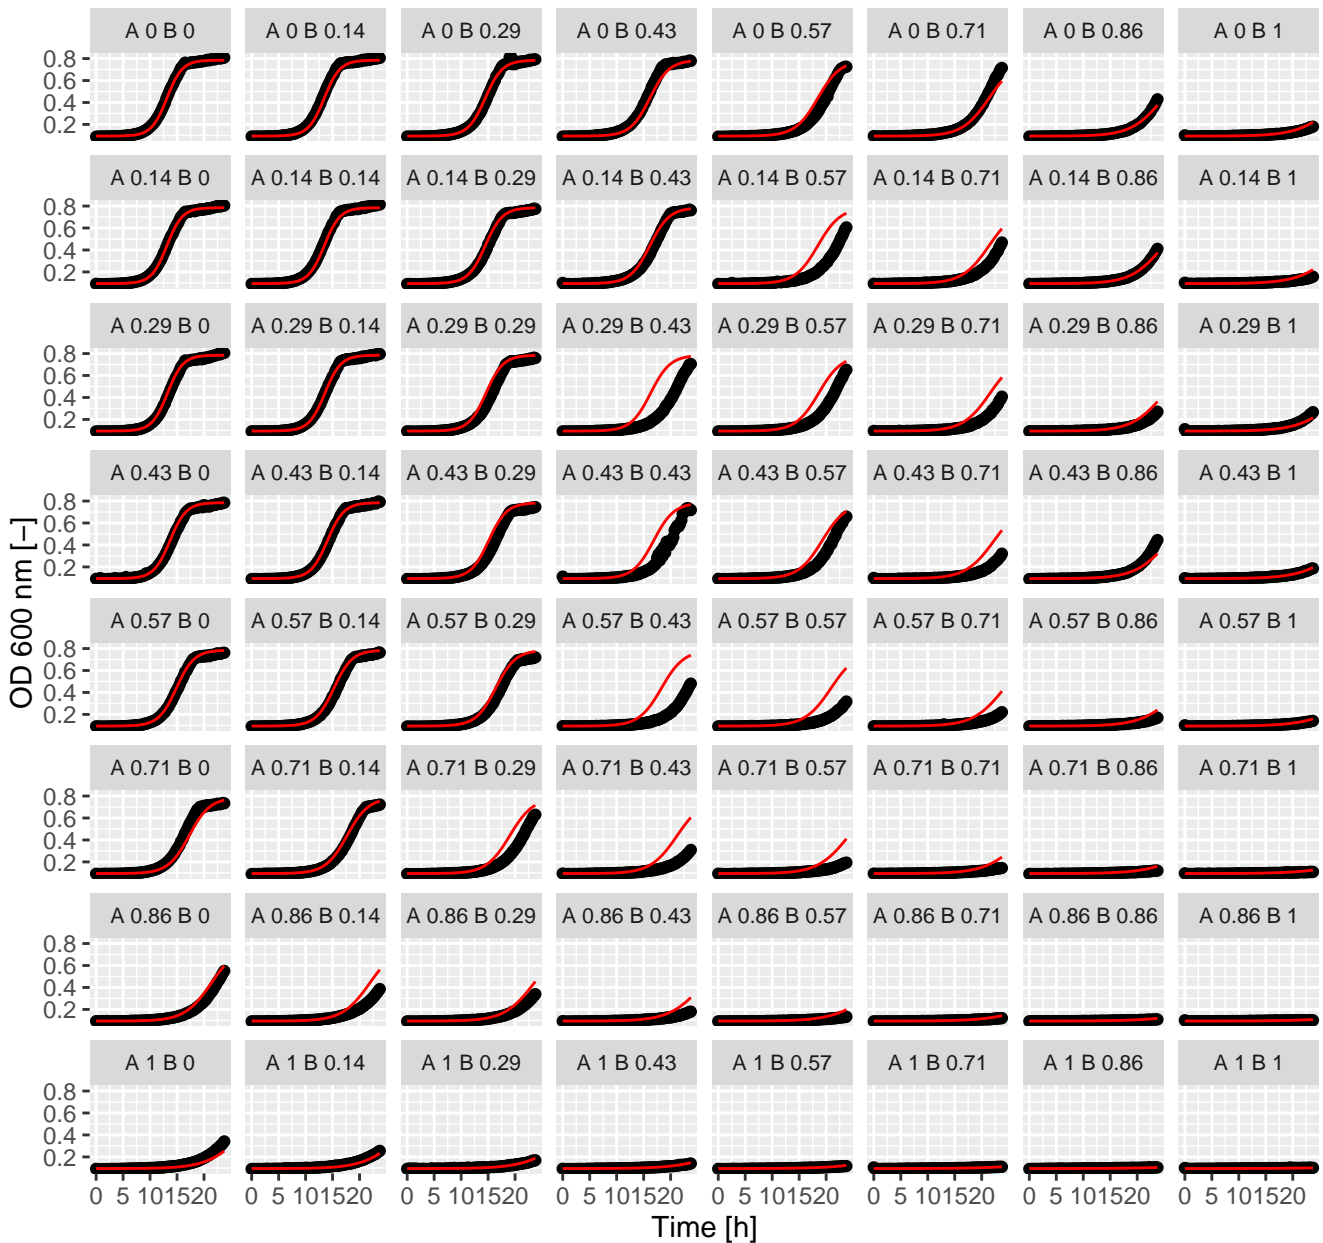

Lat.Tun (= Ax.Bx) full GPDI  
Int\_AB = -0.09 and Int\_BA = -0.25 at EC50

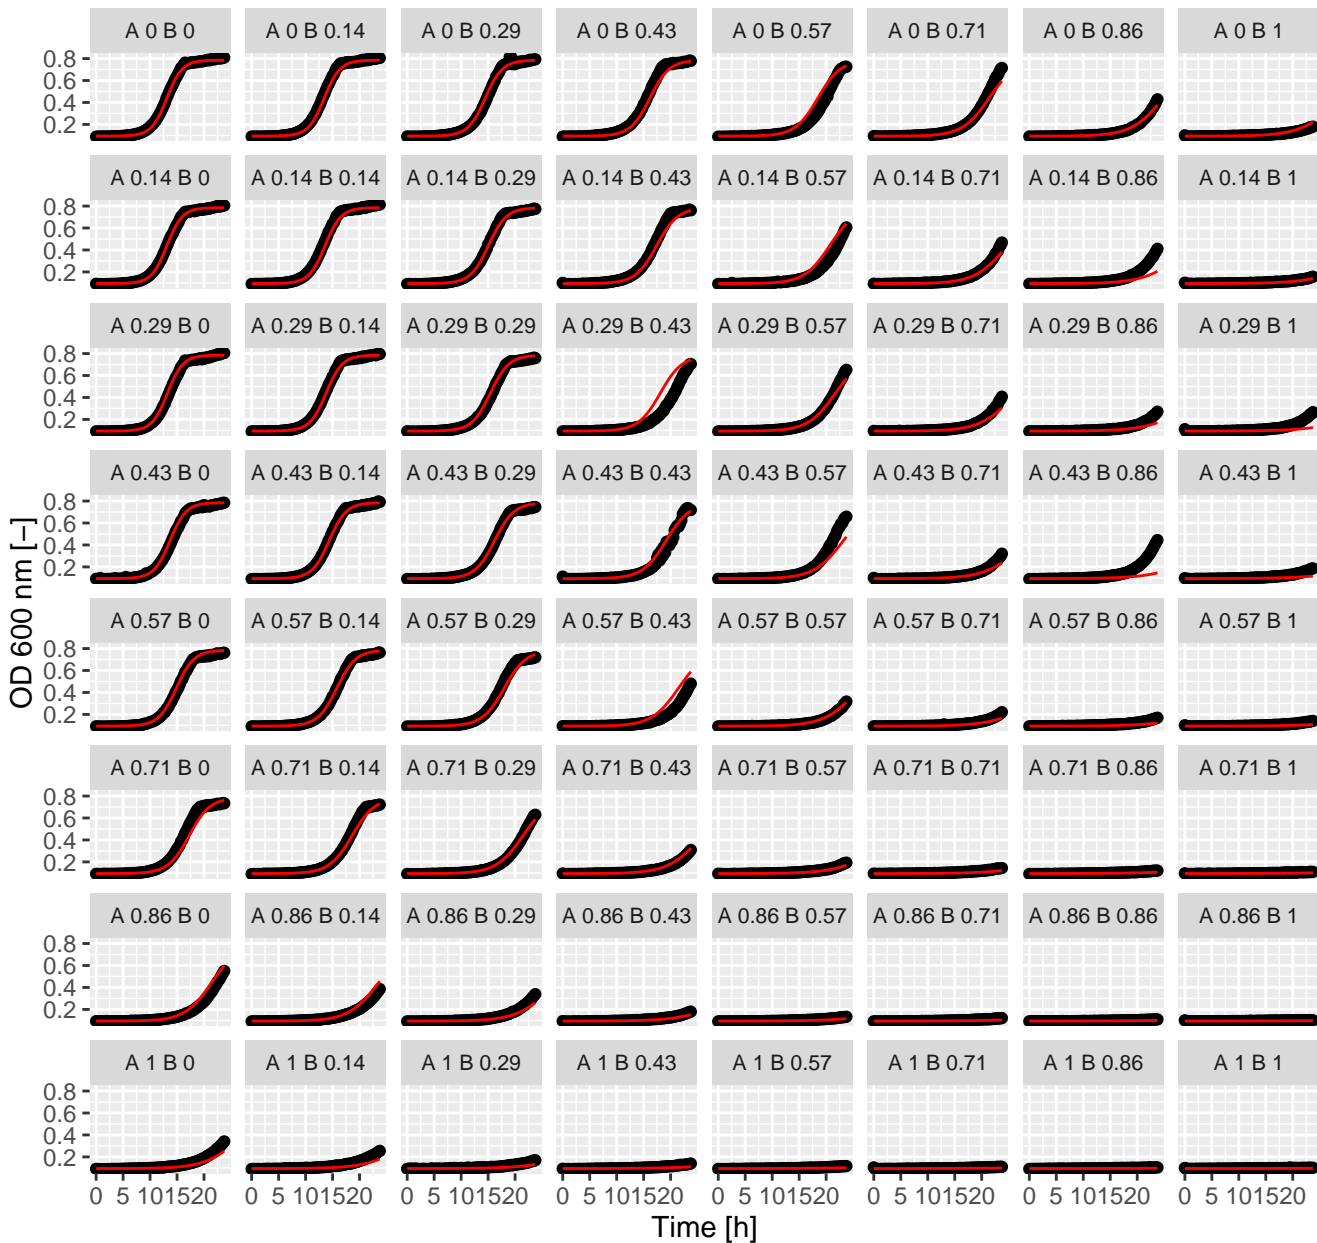

Lat.Ter (= Ax.Bx) exp. additivity (BI)  
Int\_AB = 0 and Int\_BA = 0 at EC50

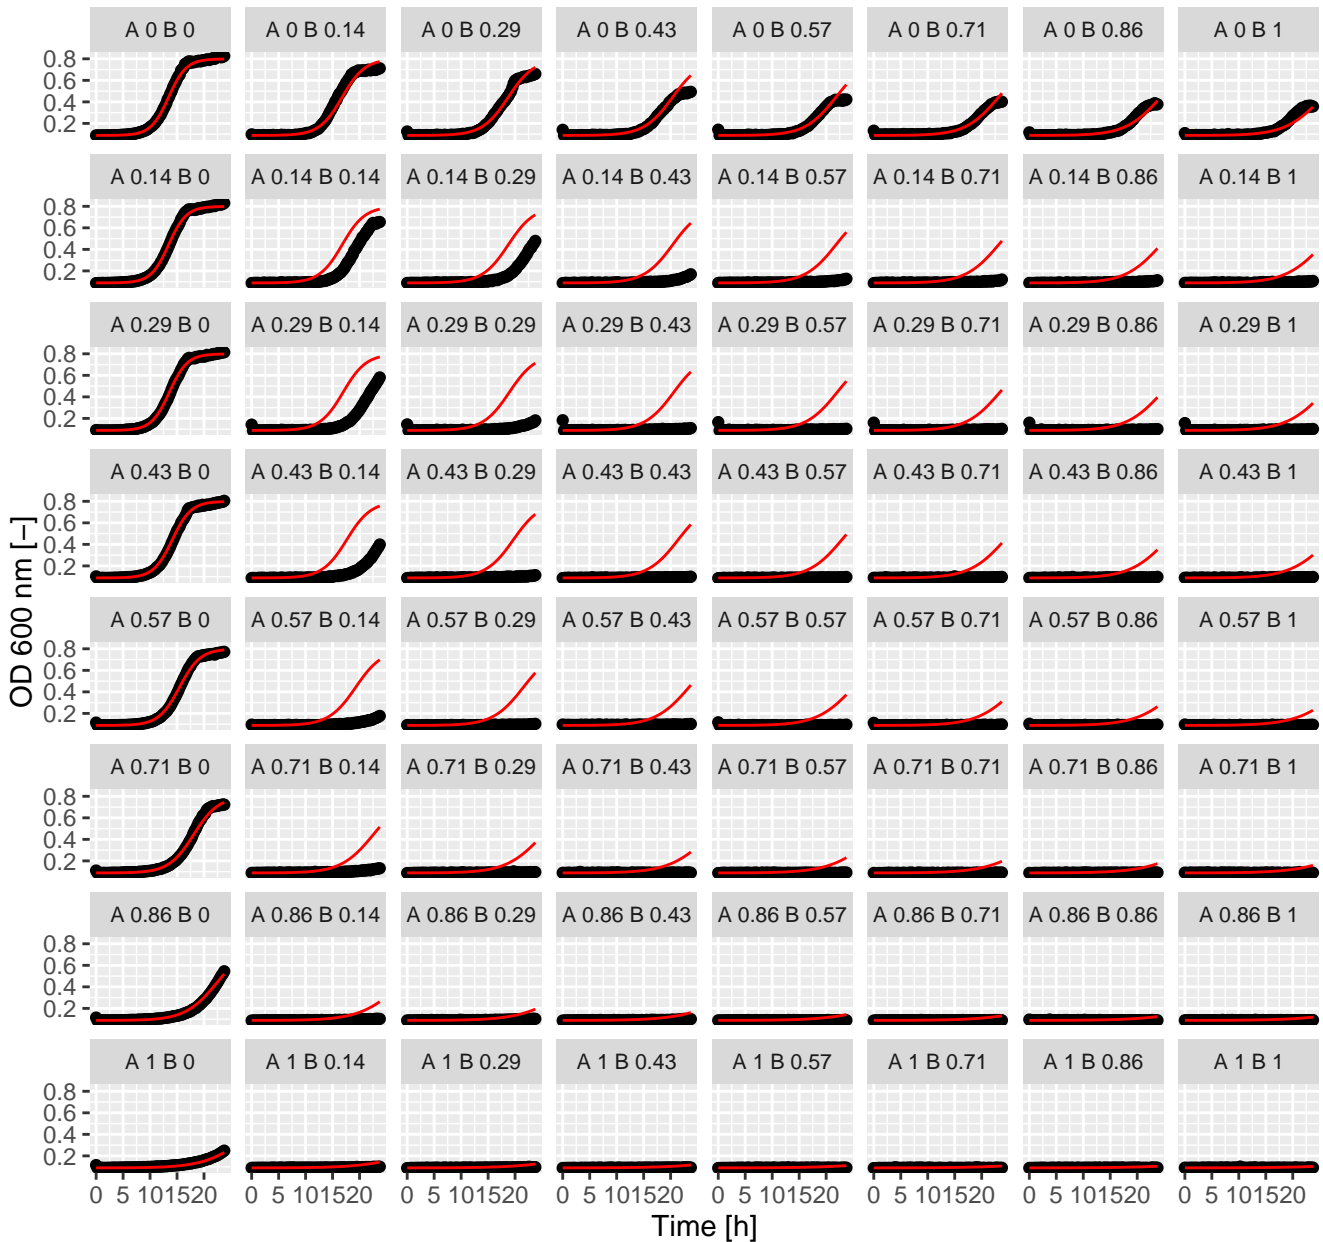

Lat.Ter (= Ax.Bx) full GPDI  
Int\_AB = -0.75 and Int\_BA = -0.79 at EC50

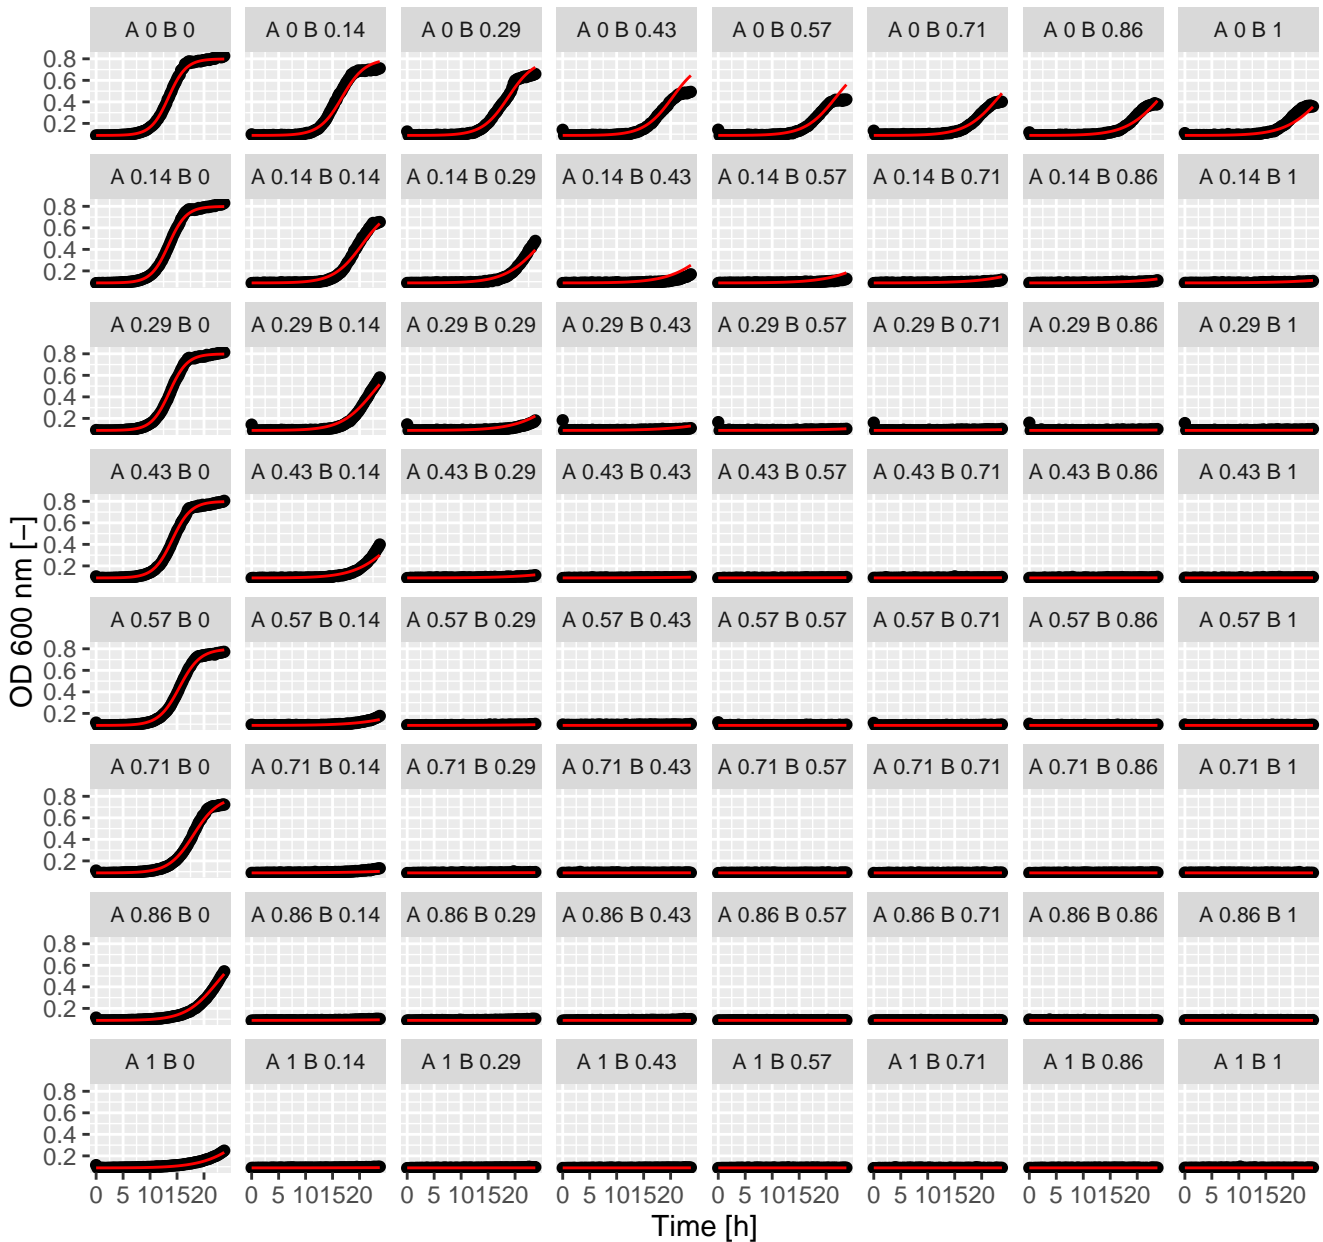



Lat.Tam (= Ax.Bx) exp. additivity (BI)  
Int\_AB = 0 and Int\_BA = 0 at EC50

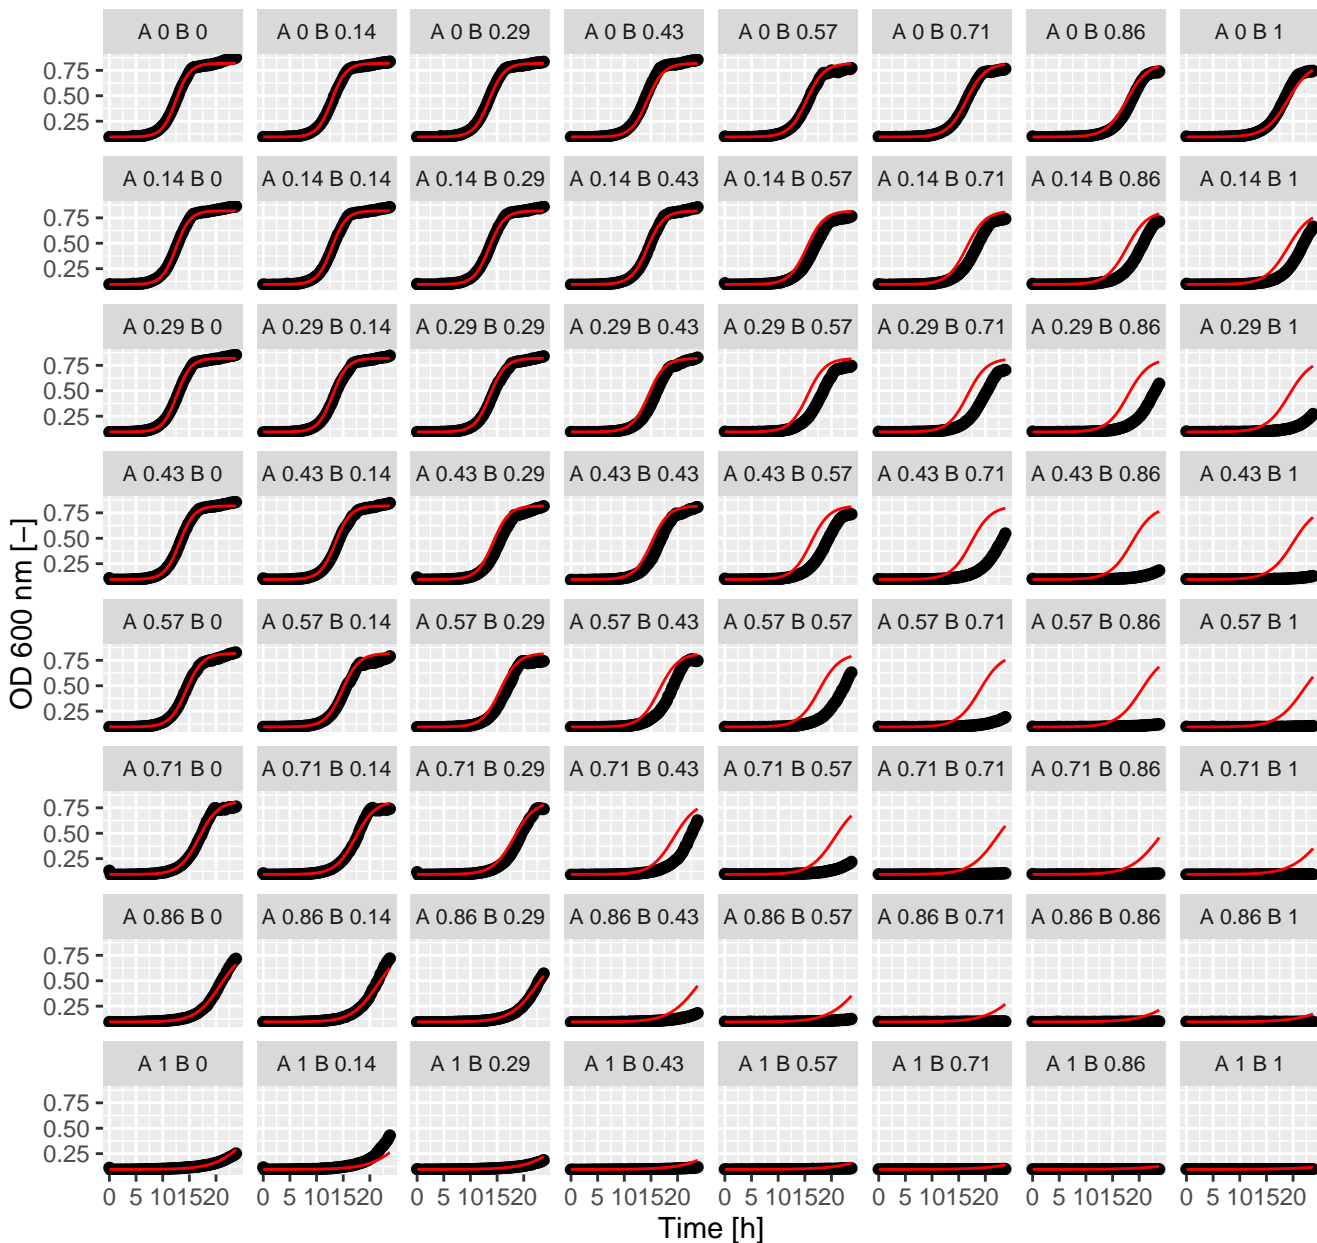

Lat.Tam (= Ax.Bx) full GPDI  
Int\_AB = 0.26 and Int\_BA = -0.64 at EC50

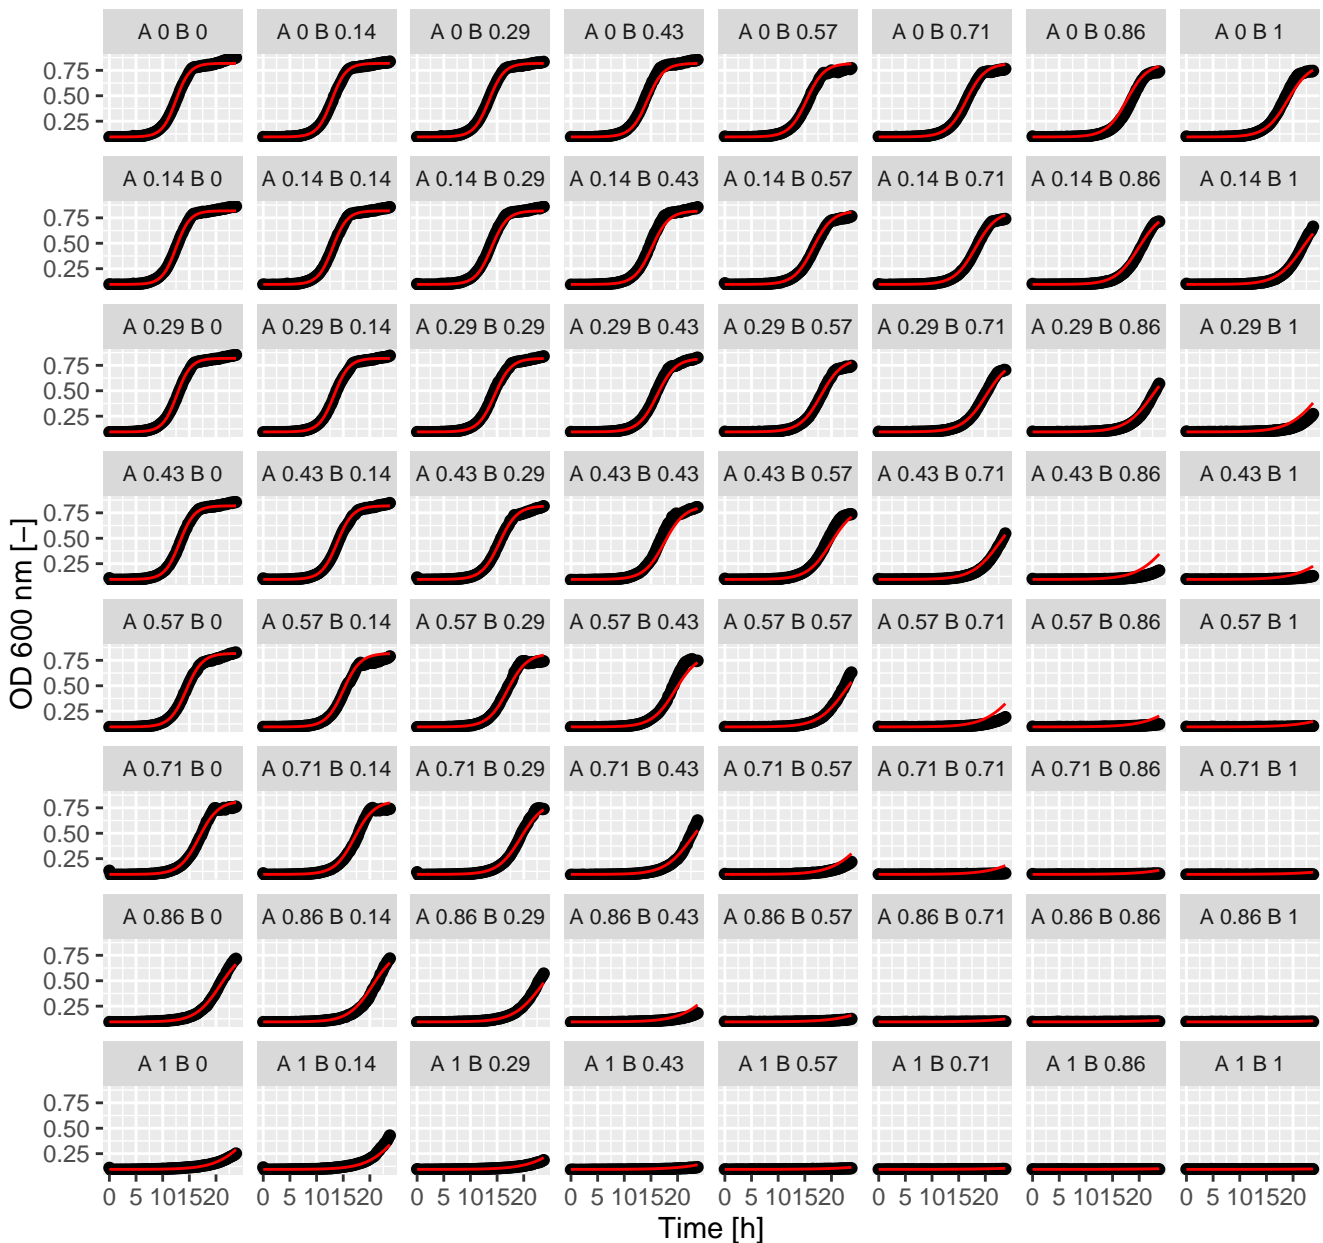

Lat. Tac (= Ax.Bx) exp. additivity (BI)  
Int\_AB = 0 and Int\_BA = 0 at EC50

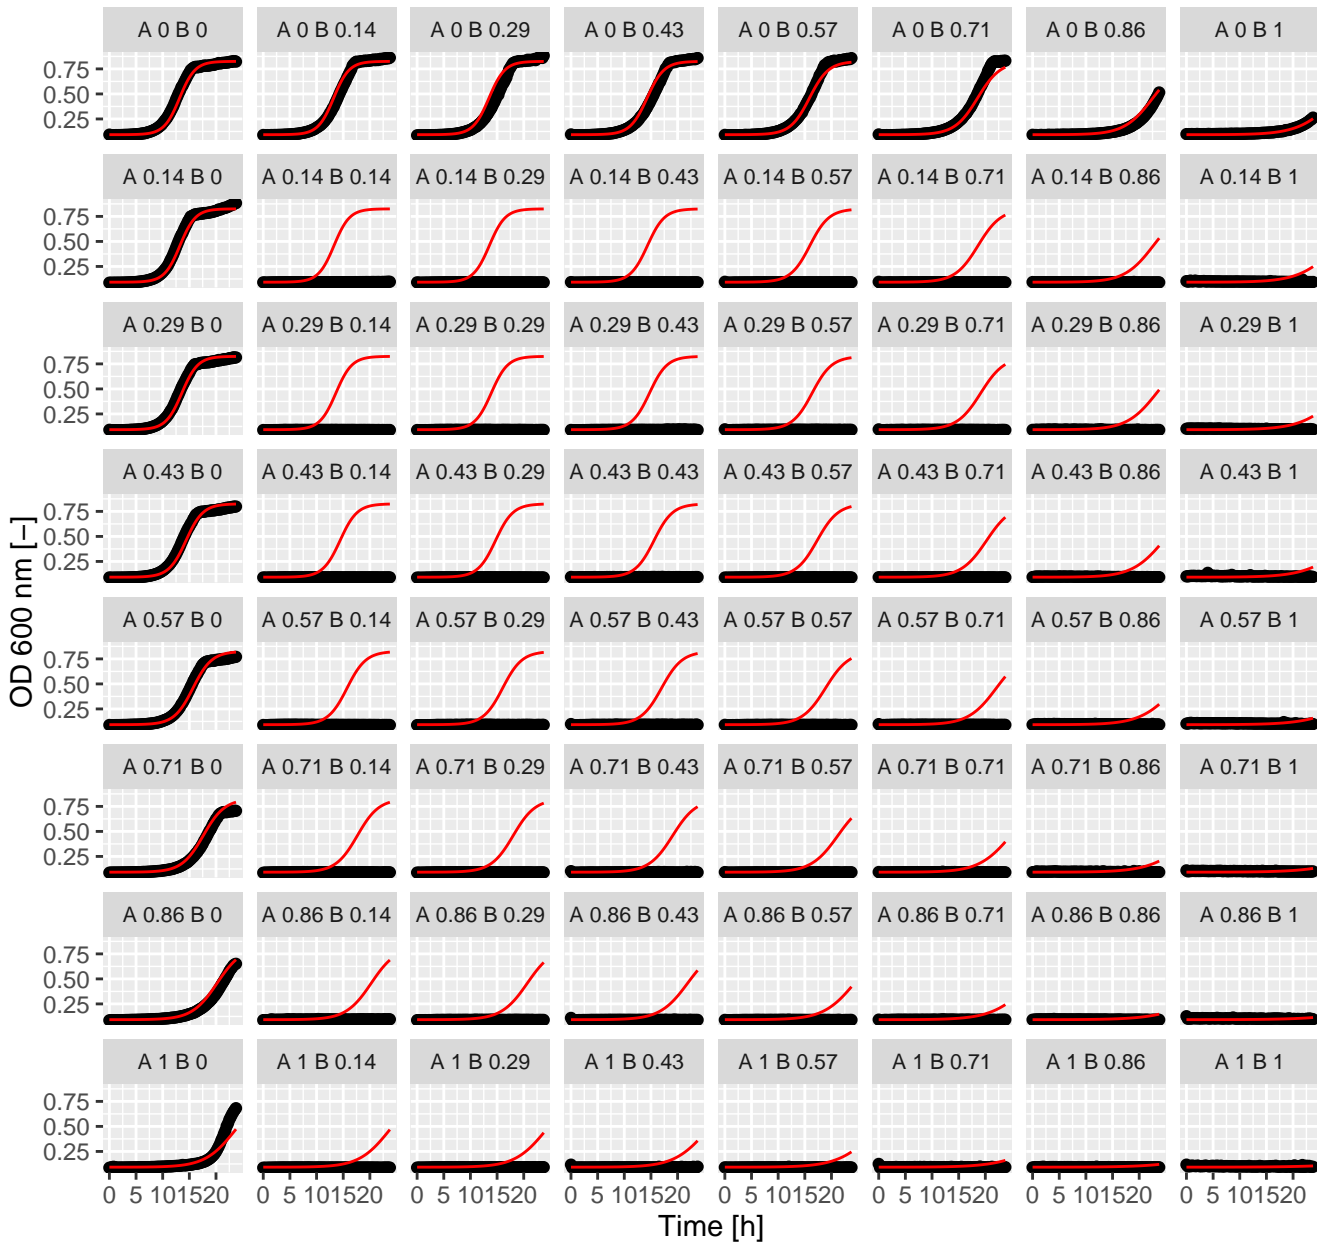

Lat.Tac (= Ax.Bx) full GPDI  
 Int\_AB = -0.98 and Int\_BA = -0.98 at EC50

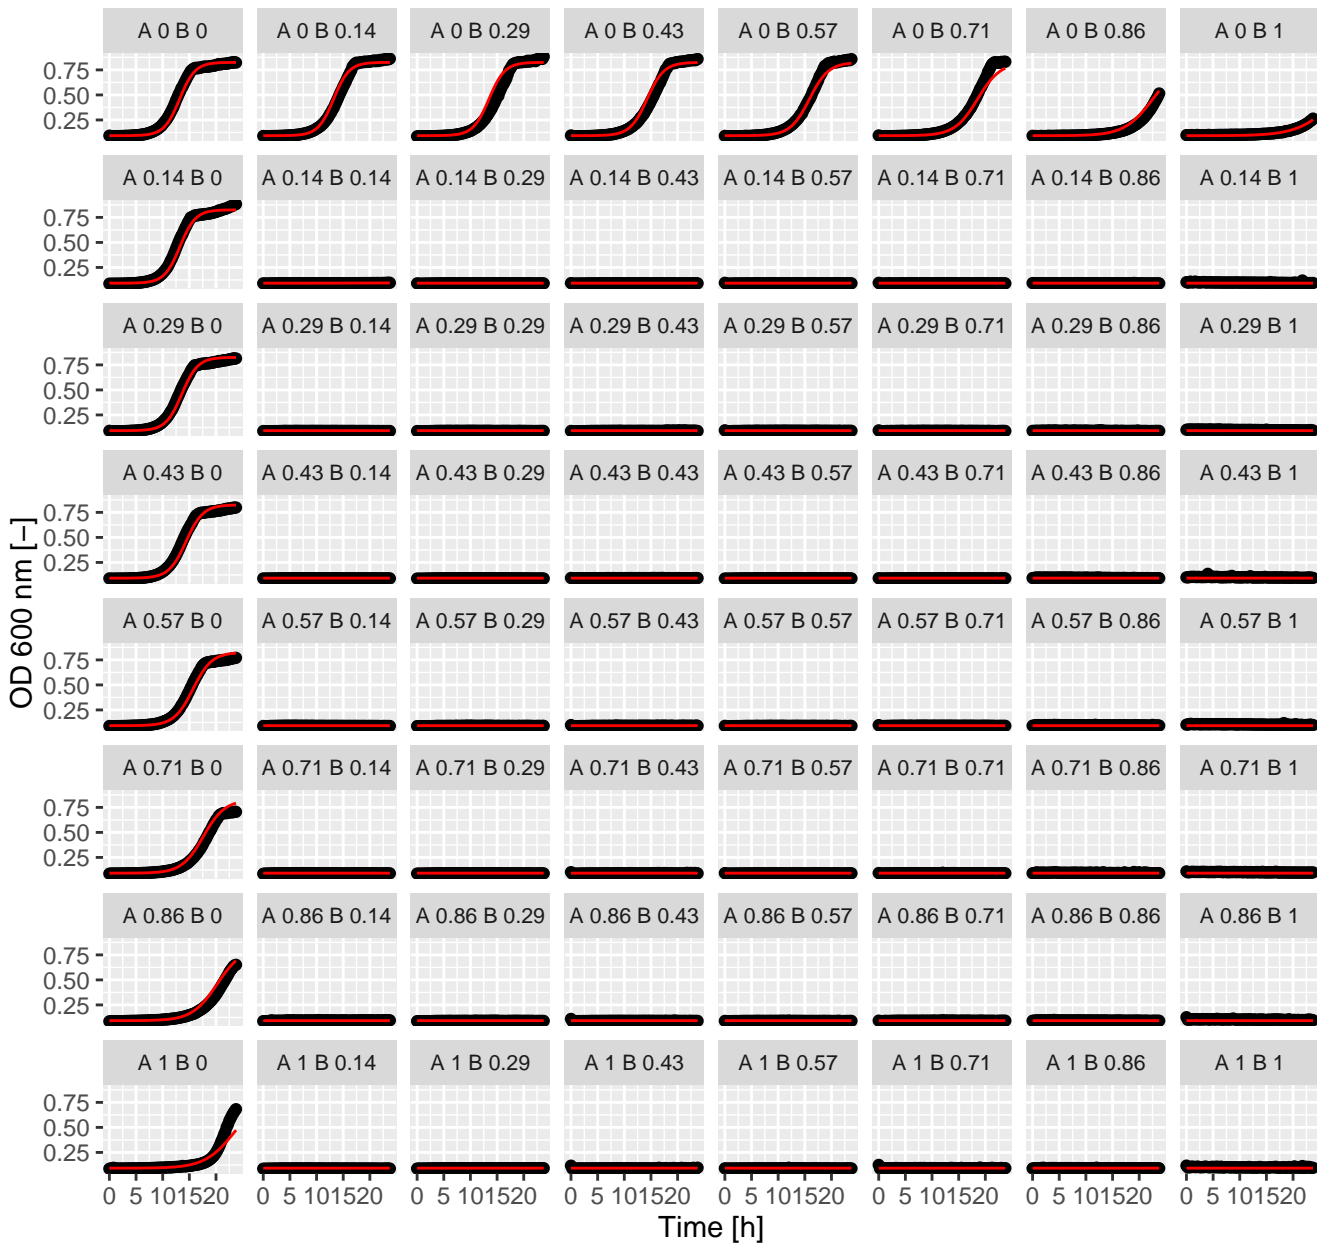

Lat.Sta (= Ax.Bx) exp. additivity (BI)  
Int\_AB = 0 and Int\_BA = 0 at EC50

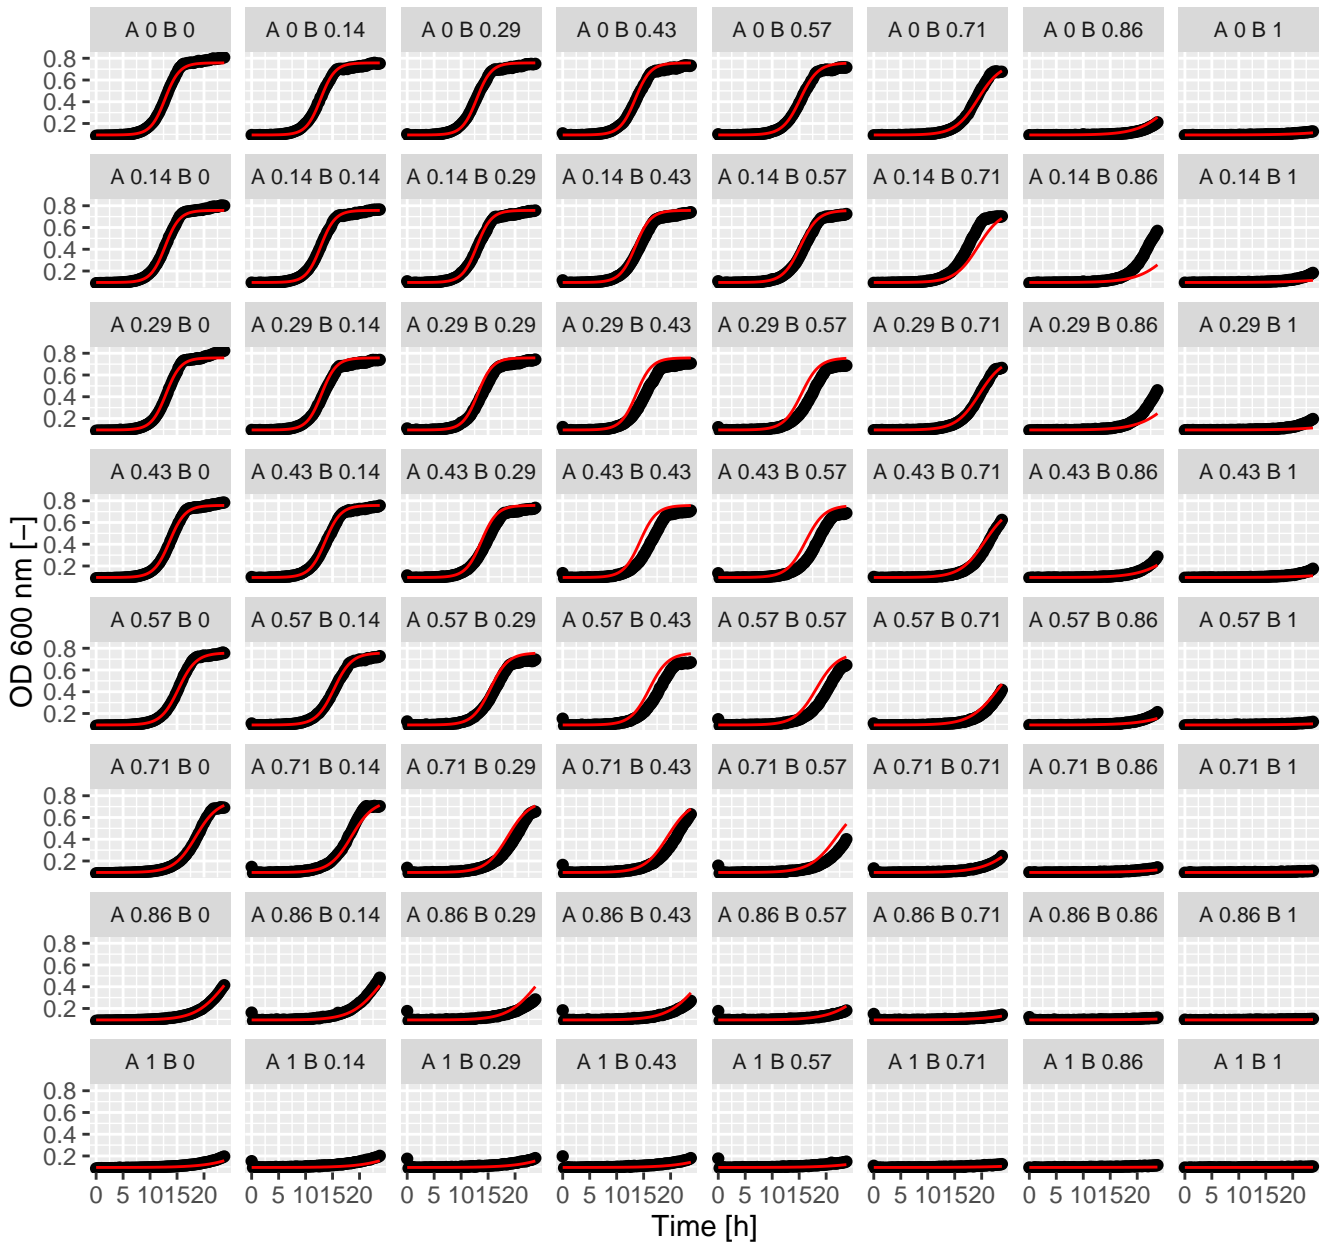

Lat.Sta (= Ax.Bx) full GPDI  
Int\_AB = -0.15 and Int\_BA = 0.02 at EC50

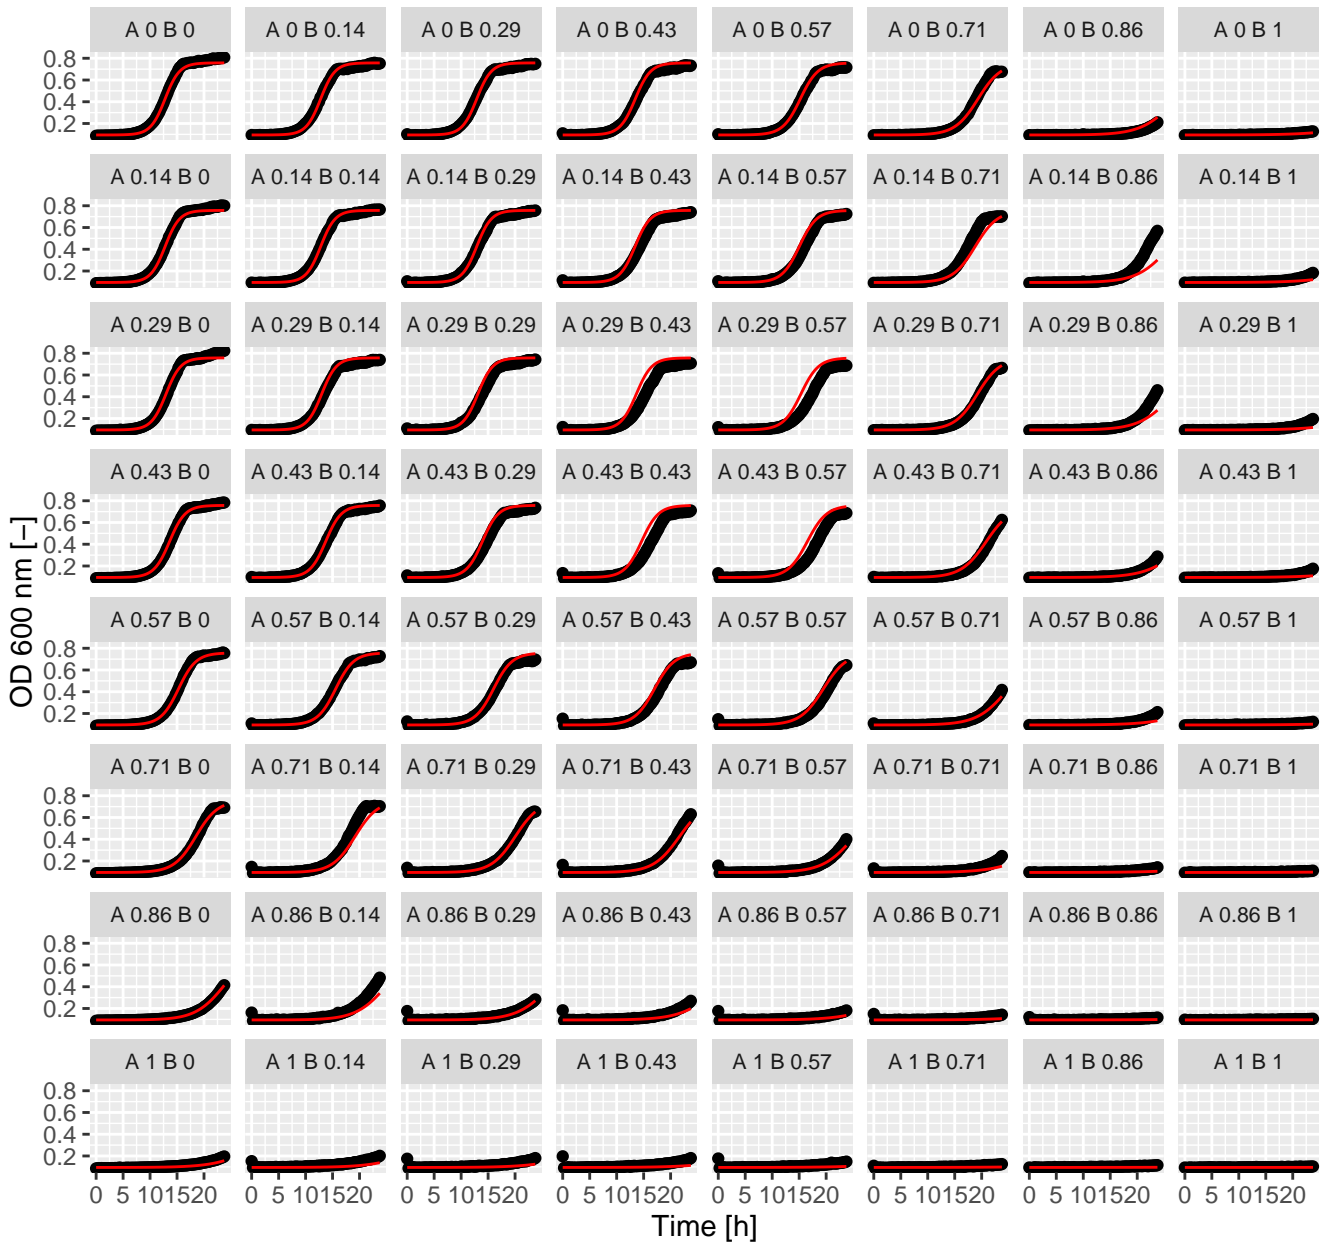

Lat.Rap (= Ax.Bx) exp. additivity (BI)  
Int\_AB = 0 and Int\_BA = 0 at EC50

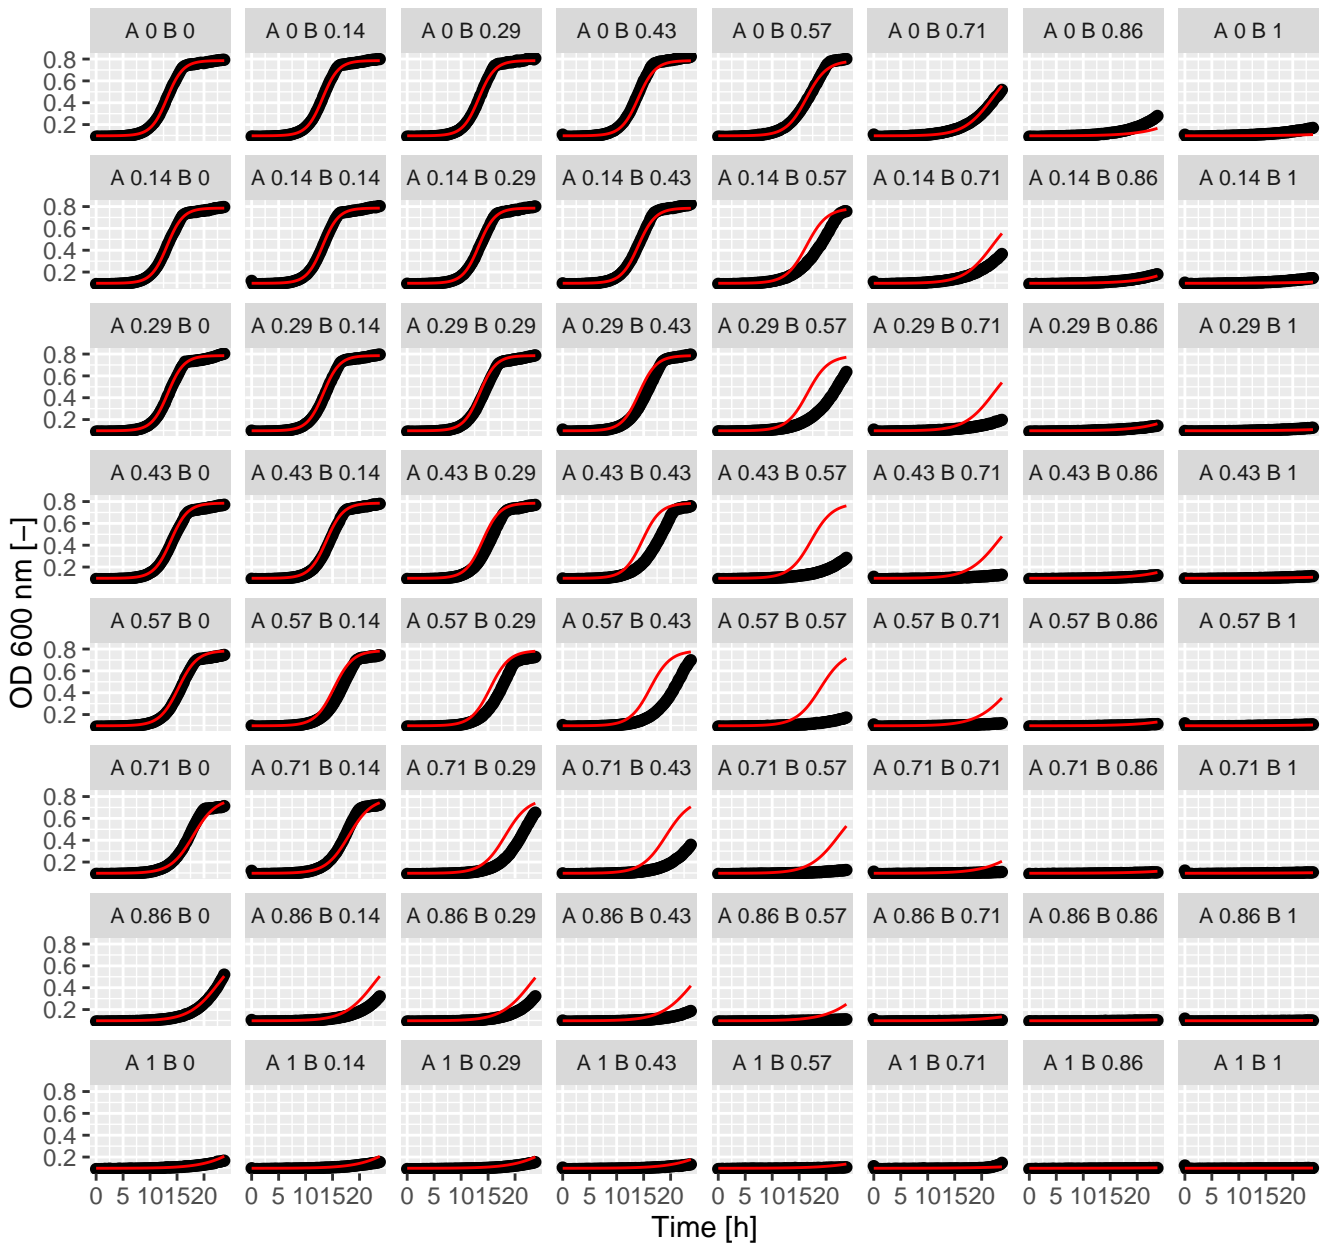

Lat.Rap (= Ax.Bx) full GPDI  
Int\_AB = -0.16 and Int\_BA = -0.33 at EC50

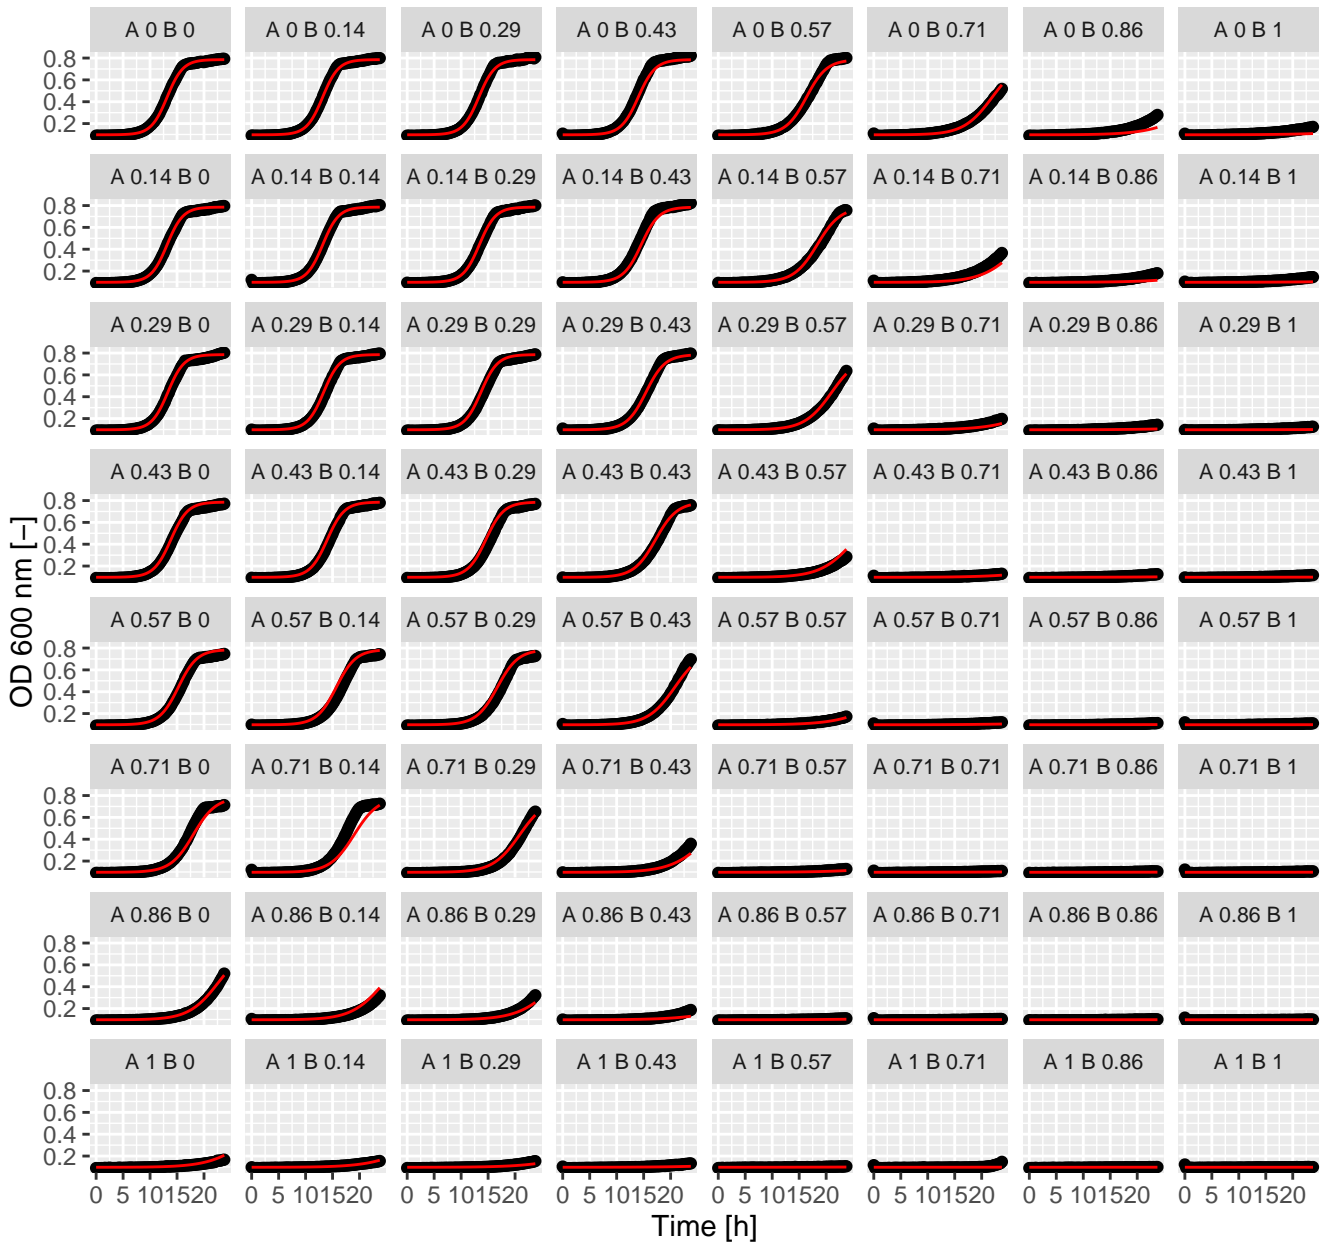



Lat.Rad (= Ax.Bx) exp. additivity (BI)  
Int\_AB = 0 and Int\_BA = 0 at EC50

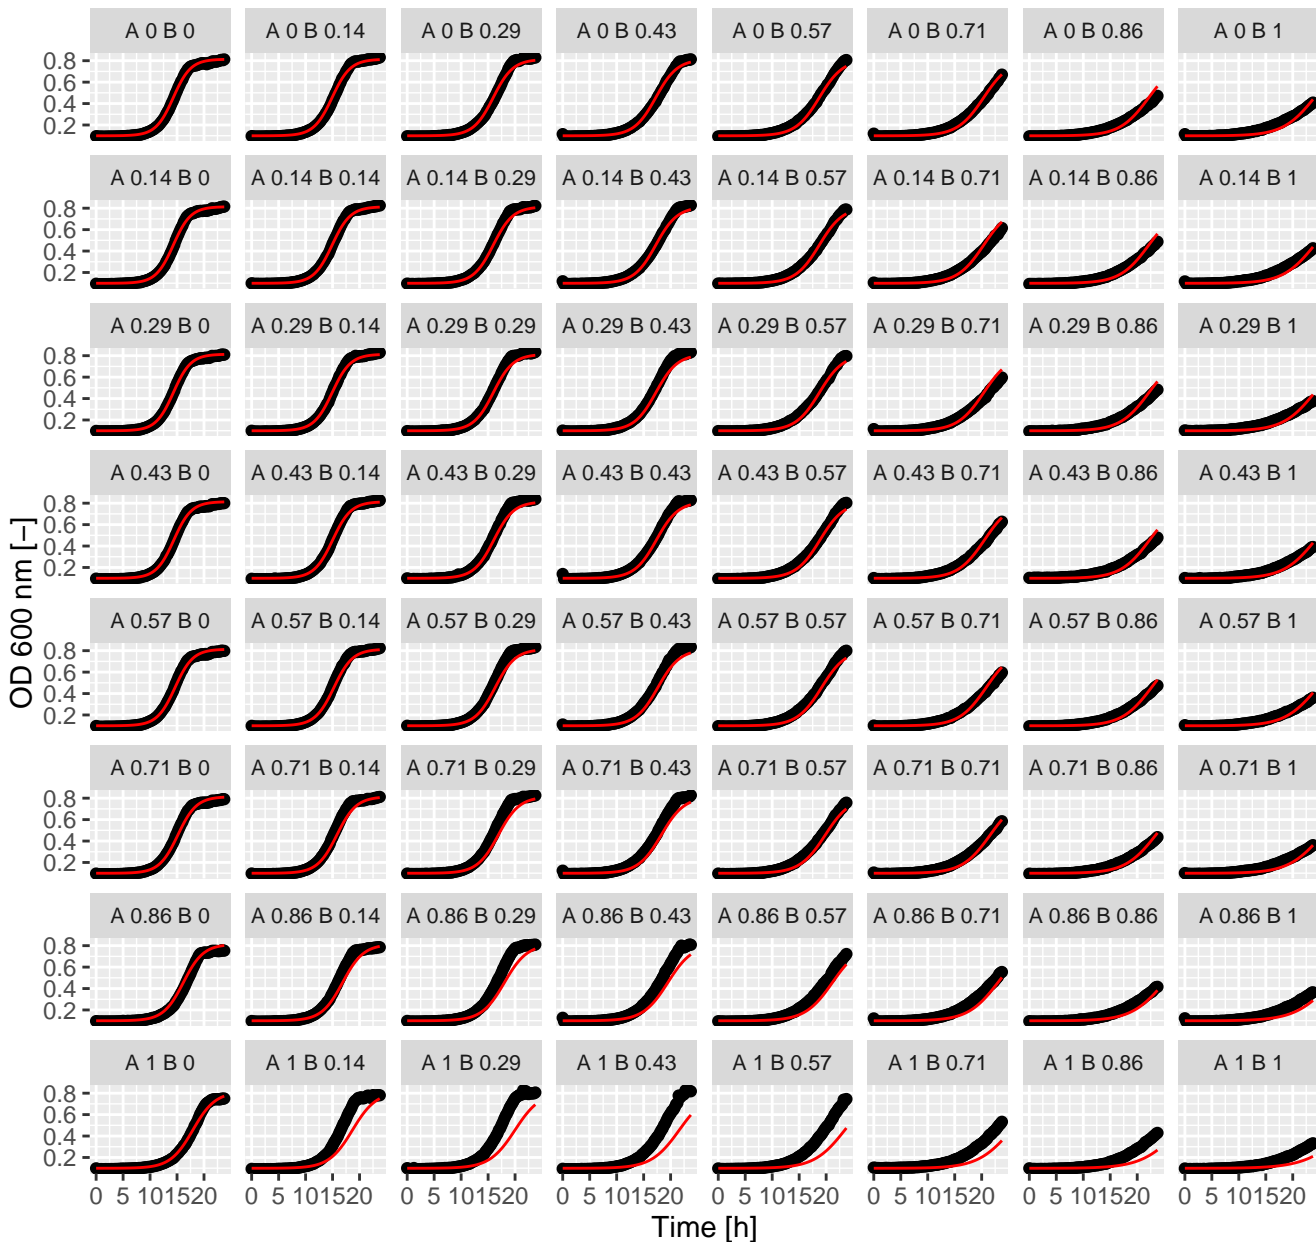

Lat.Rad (= Ax.Bx) full GPDI  
Int\_AB = 0.54 and Int\_BA = -0.04 at EC50

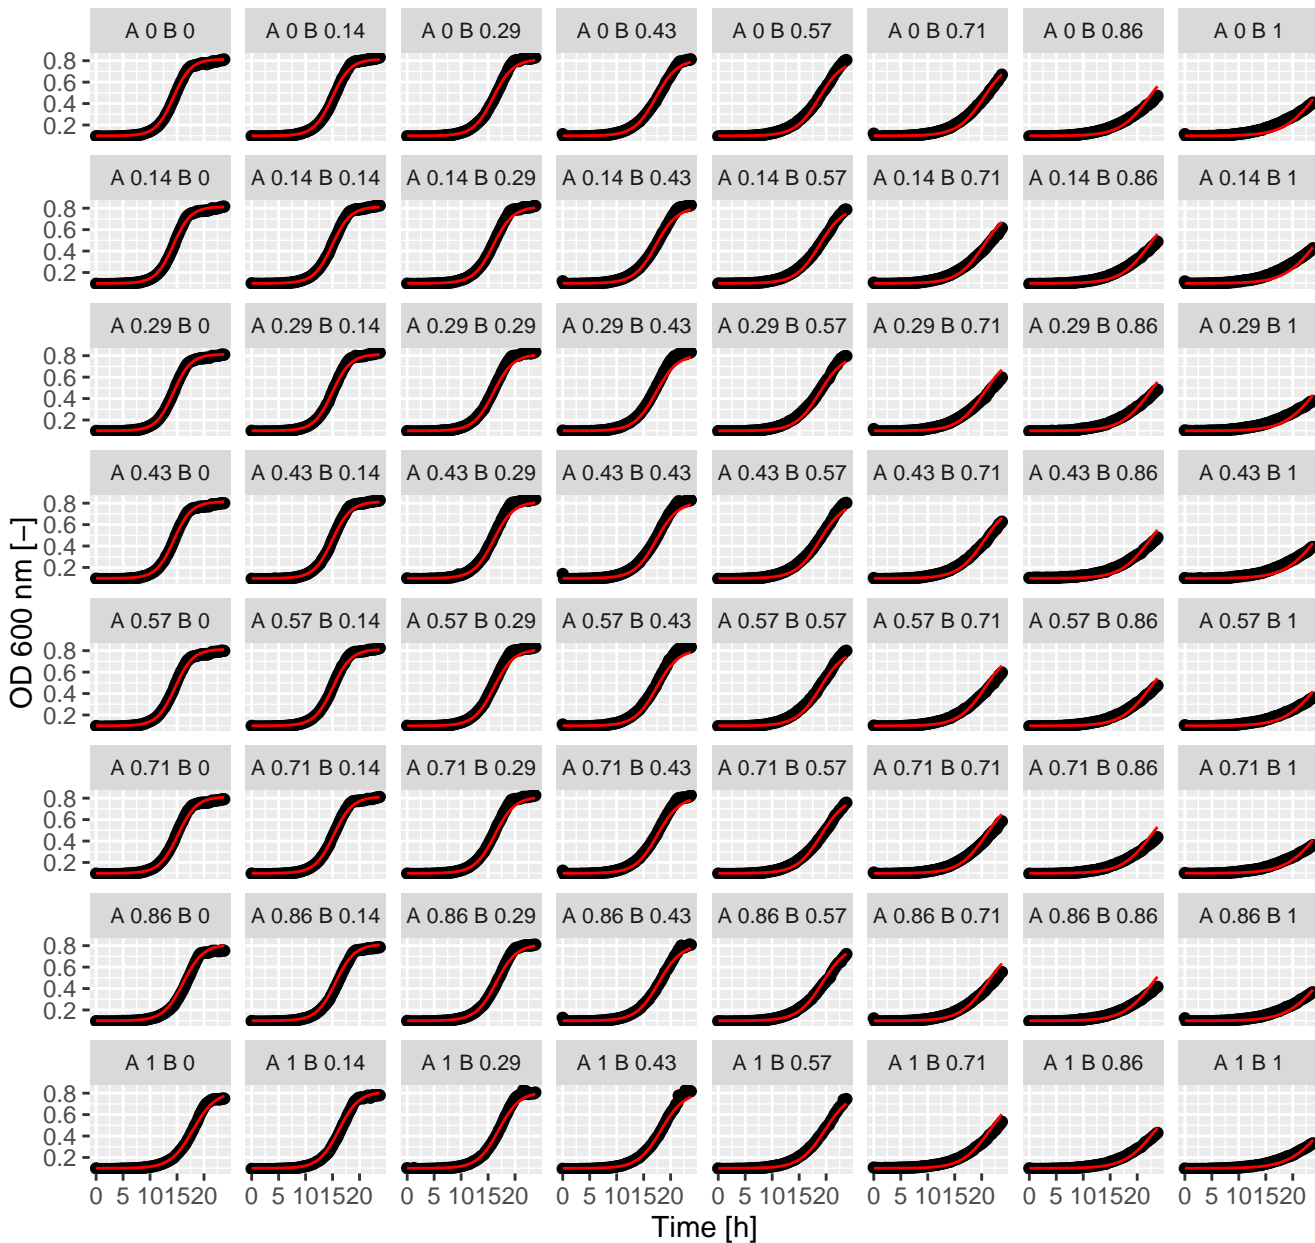

Lat.Qmy (= Ax.Bx) exp. additivity (BI)  
Int\_AB = 0 and Int\_BA = 0 at EC50

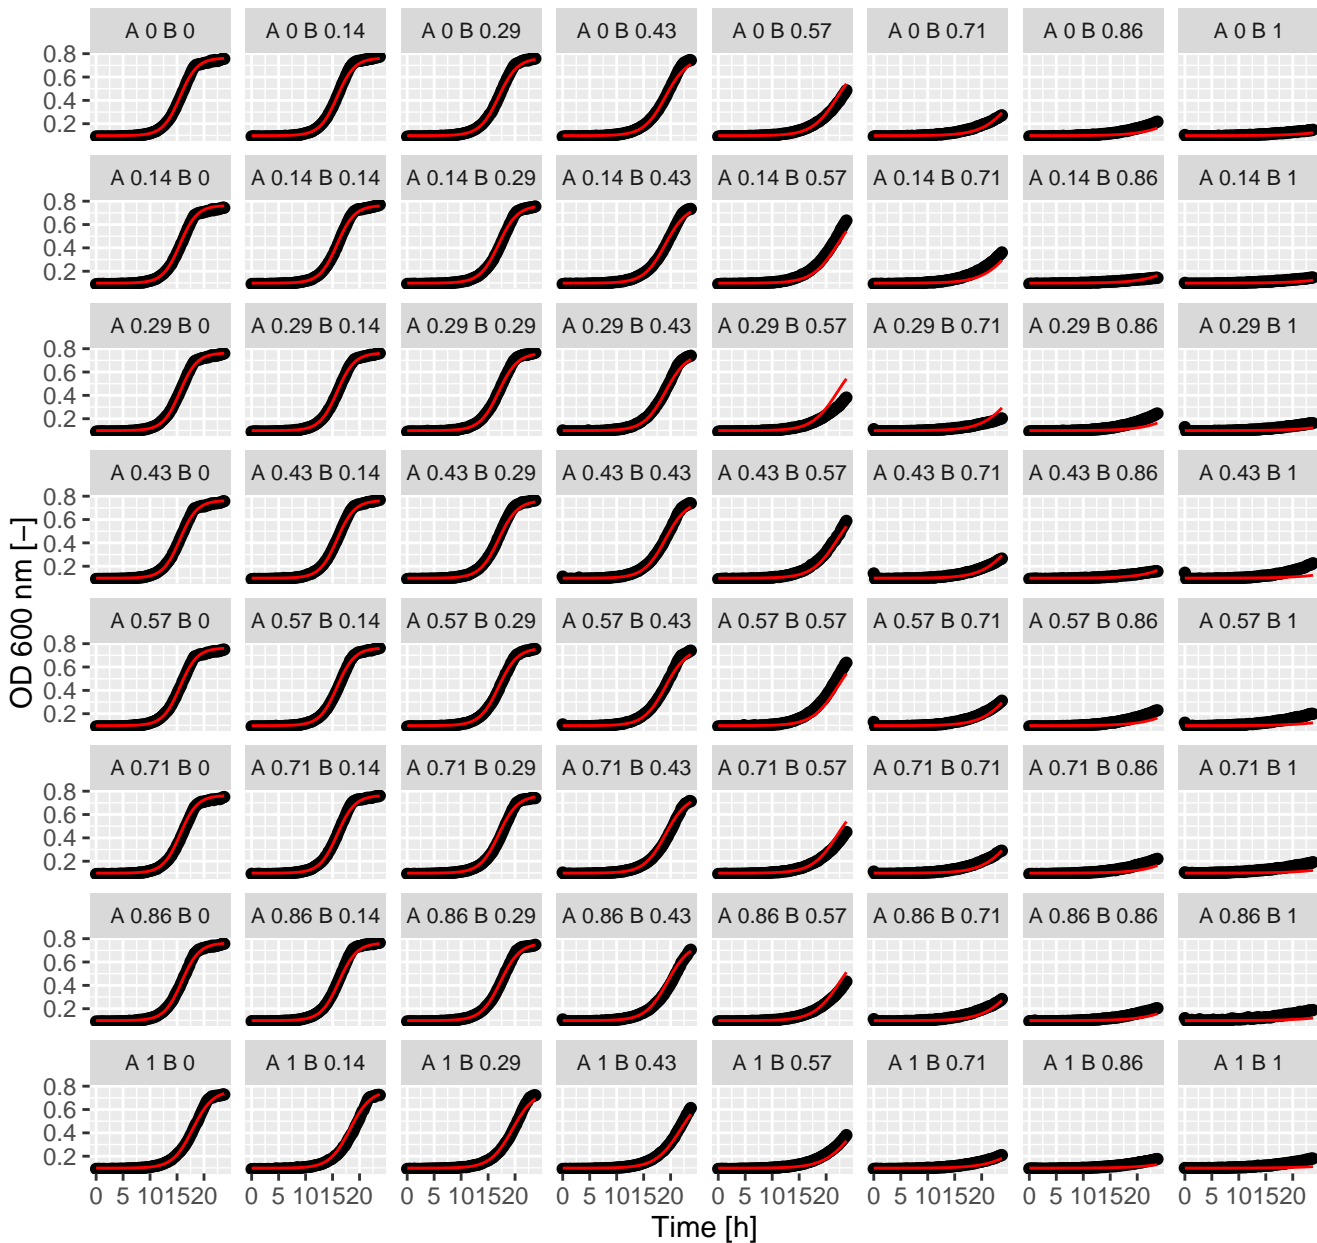

Lat.Qmy (= Ax.Bx) full GPDI  
Int\_AB = 0.01 and Int\_BA = 0.02 at EC50

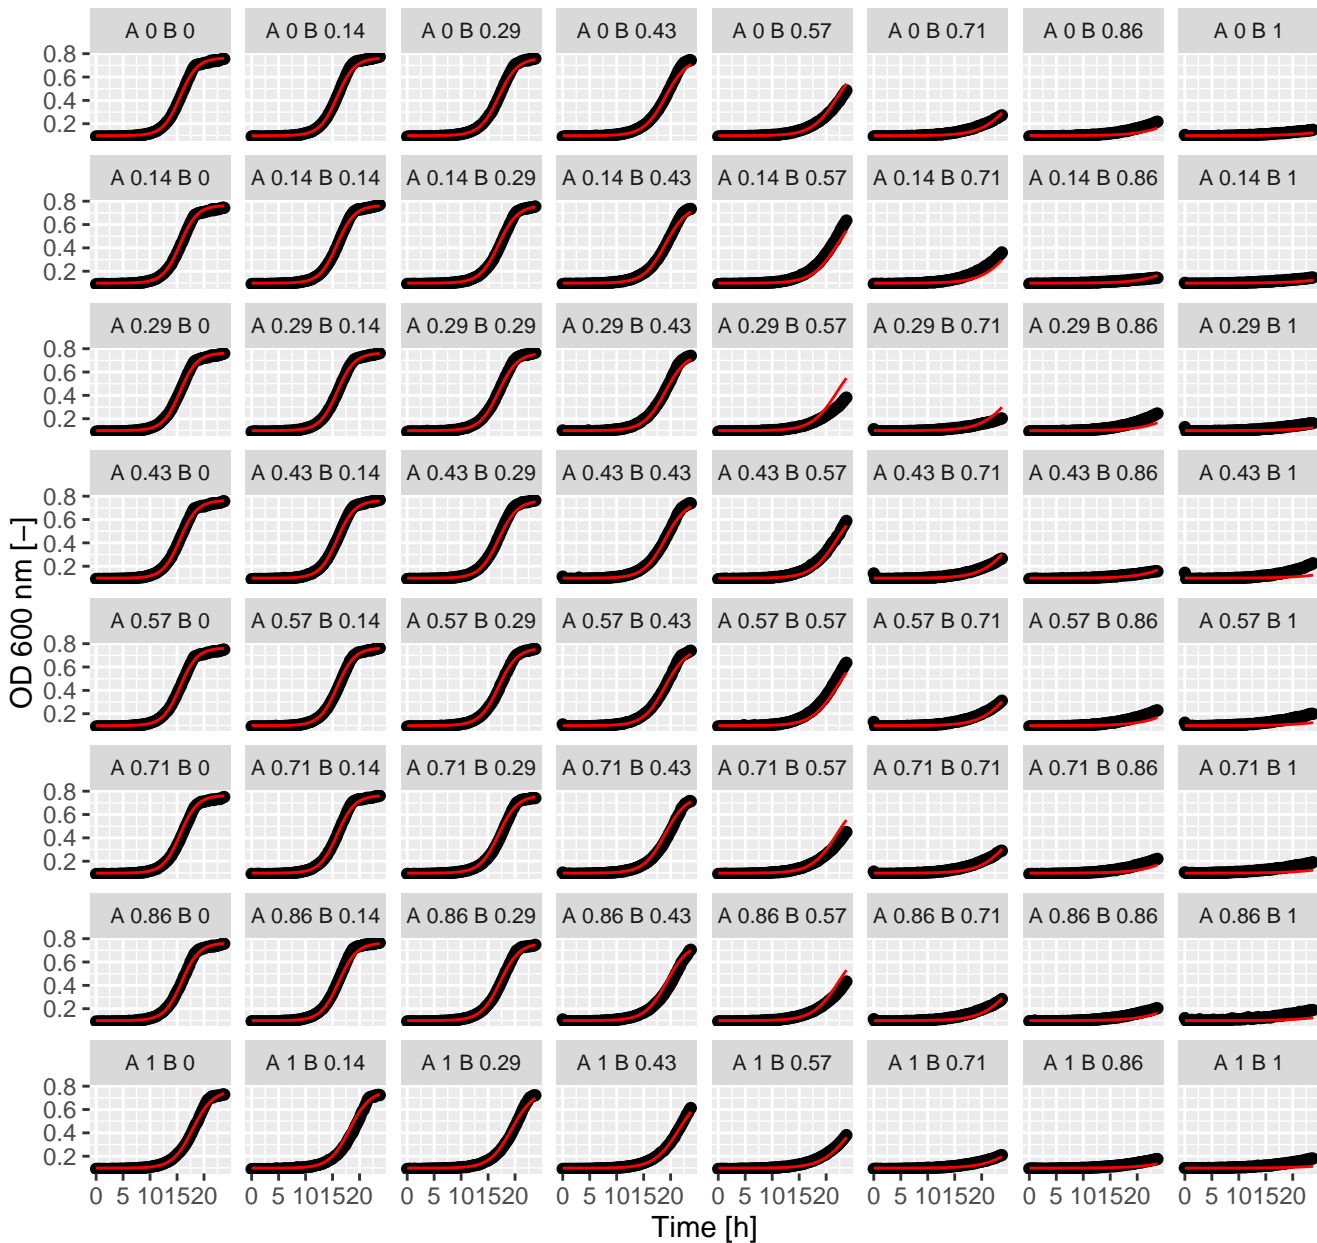

Lat.Pen (= Ax.Bx) exp. additivity (BI)  
 Int\_AB = 0 and Int\_BA = 0 at EC50

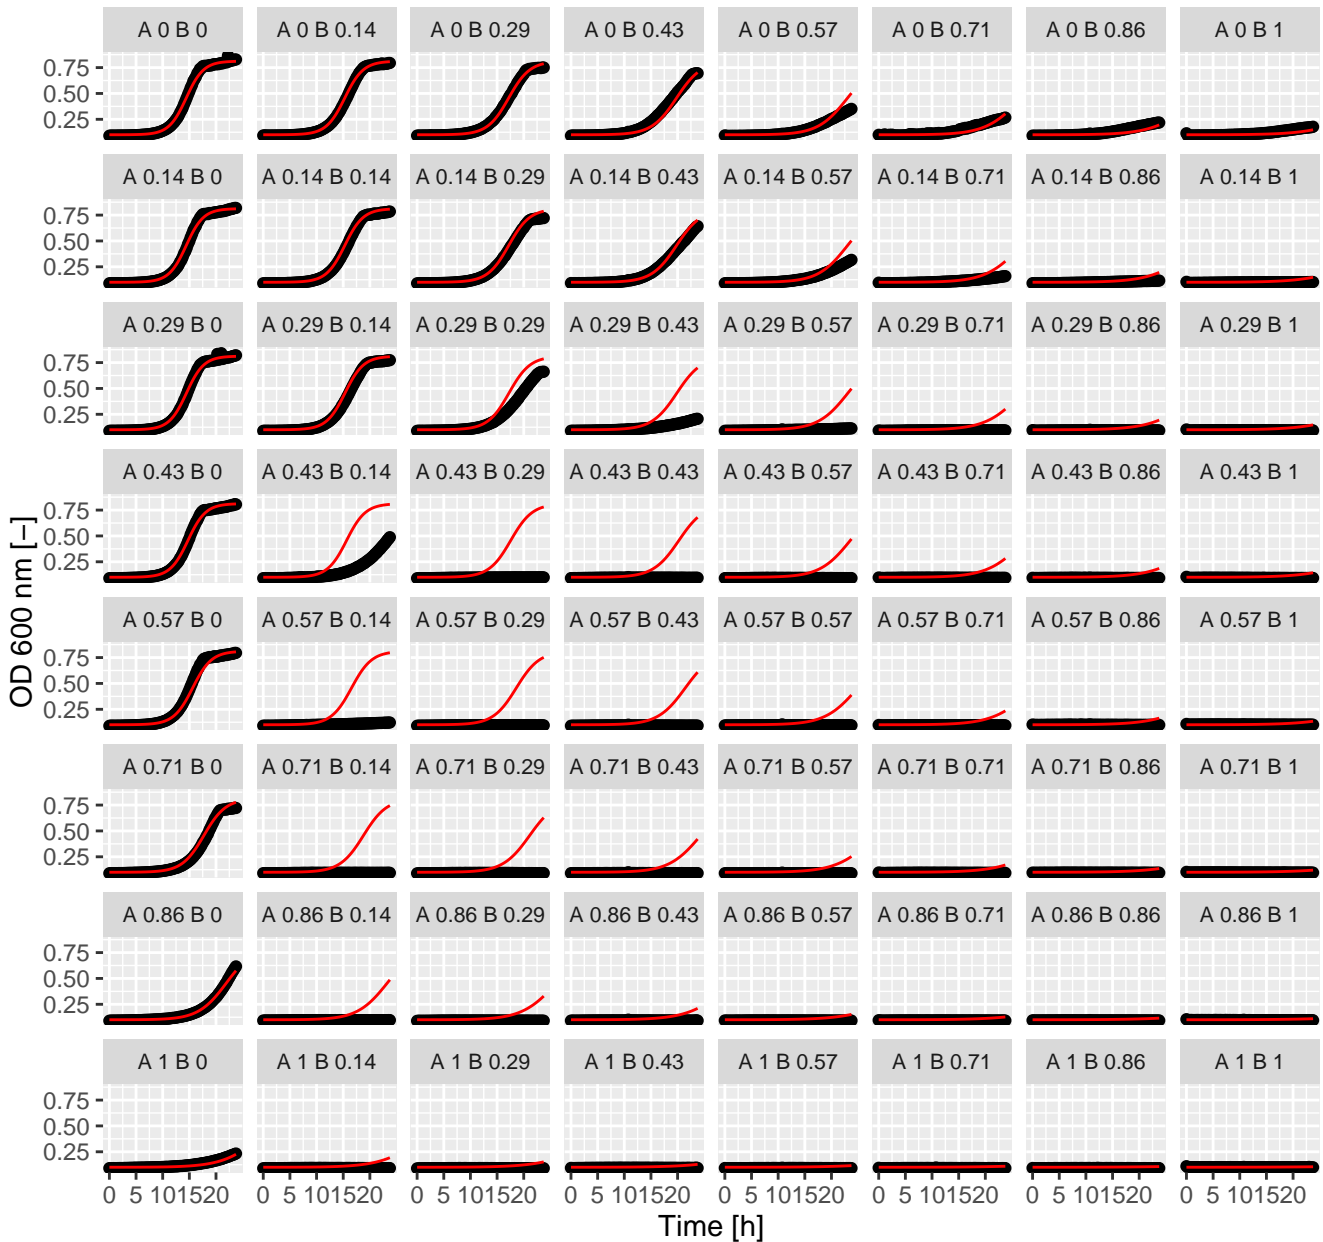

Lat.Pen (= Ax.Bx) full GPDI  
 Int\_AB = -0.66 and Int\_BA = -0.08 at EC50

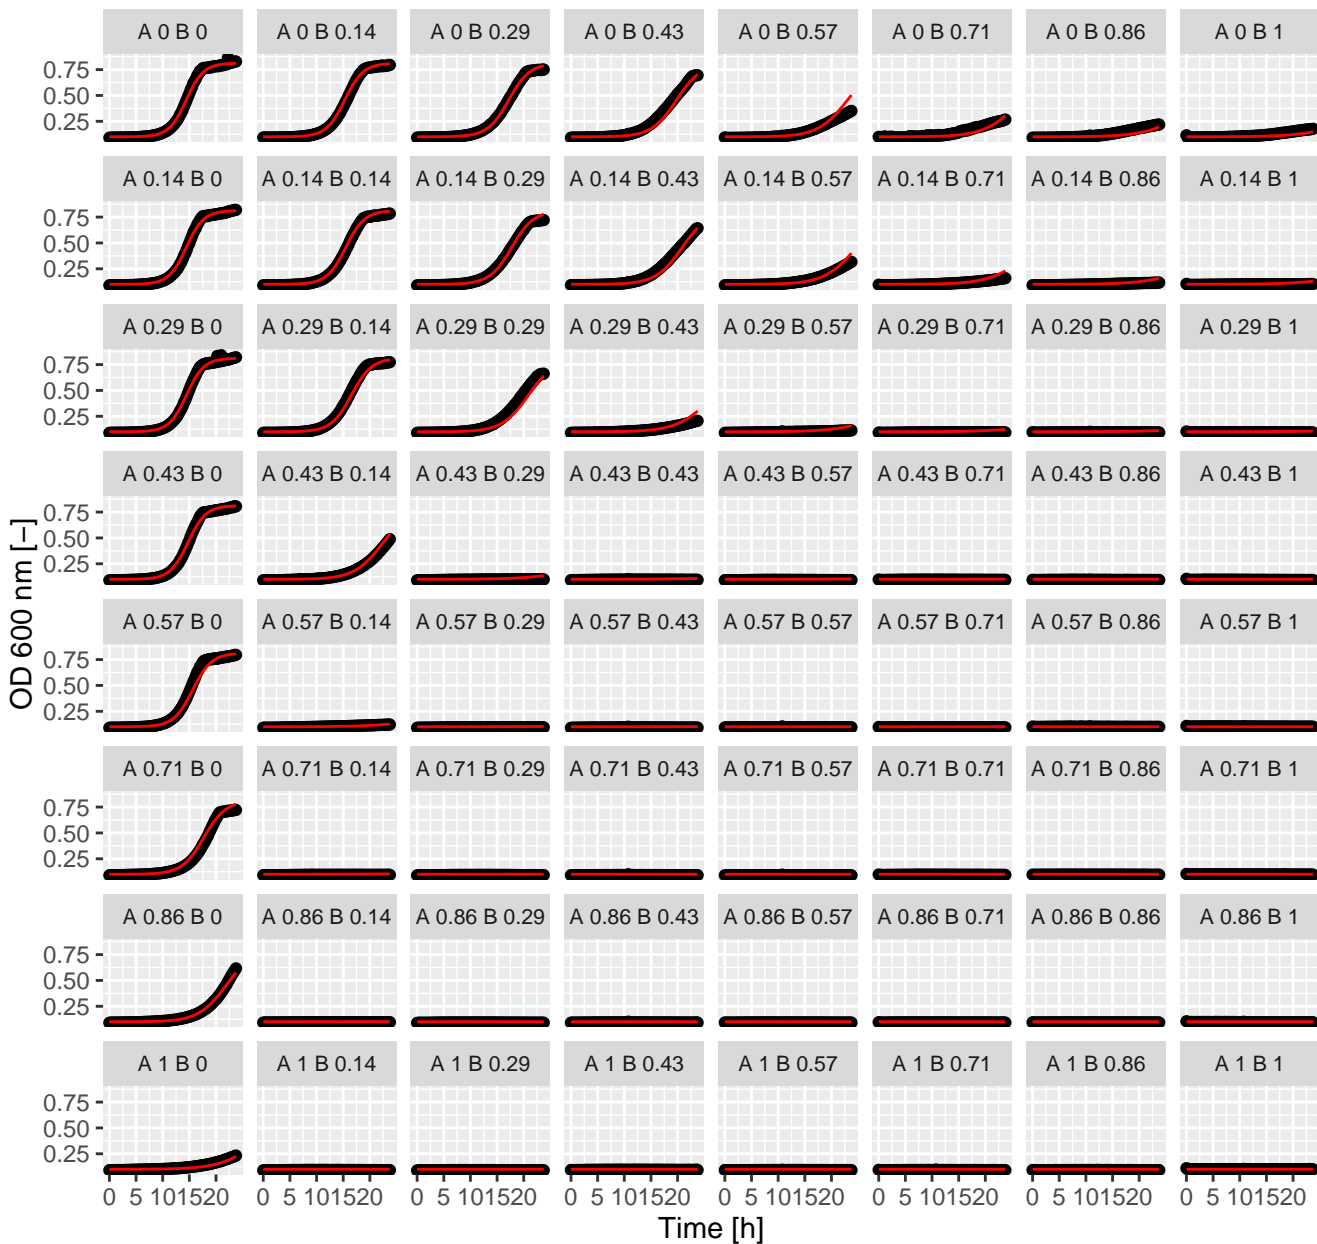

Lat.Myr (= Ax.Bx) exp. additivity (BI)  
Int\_AB = 0 and Int\_BA = 0 at EC50

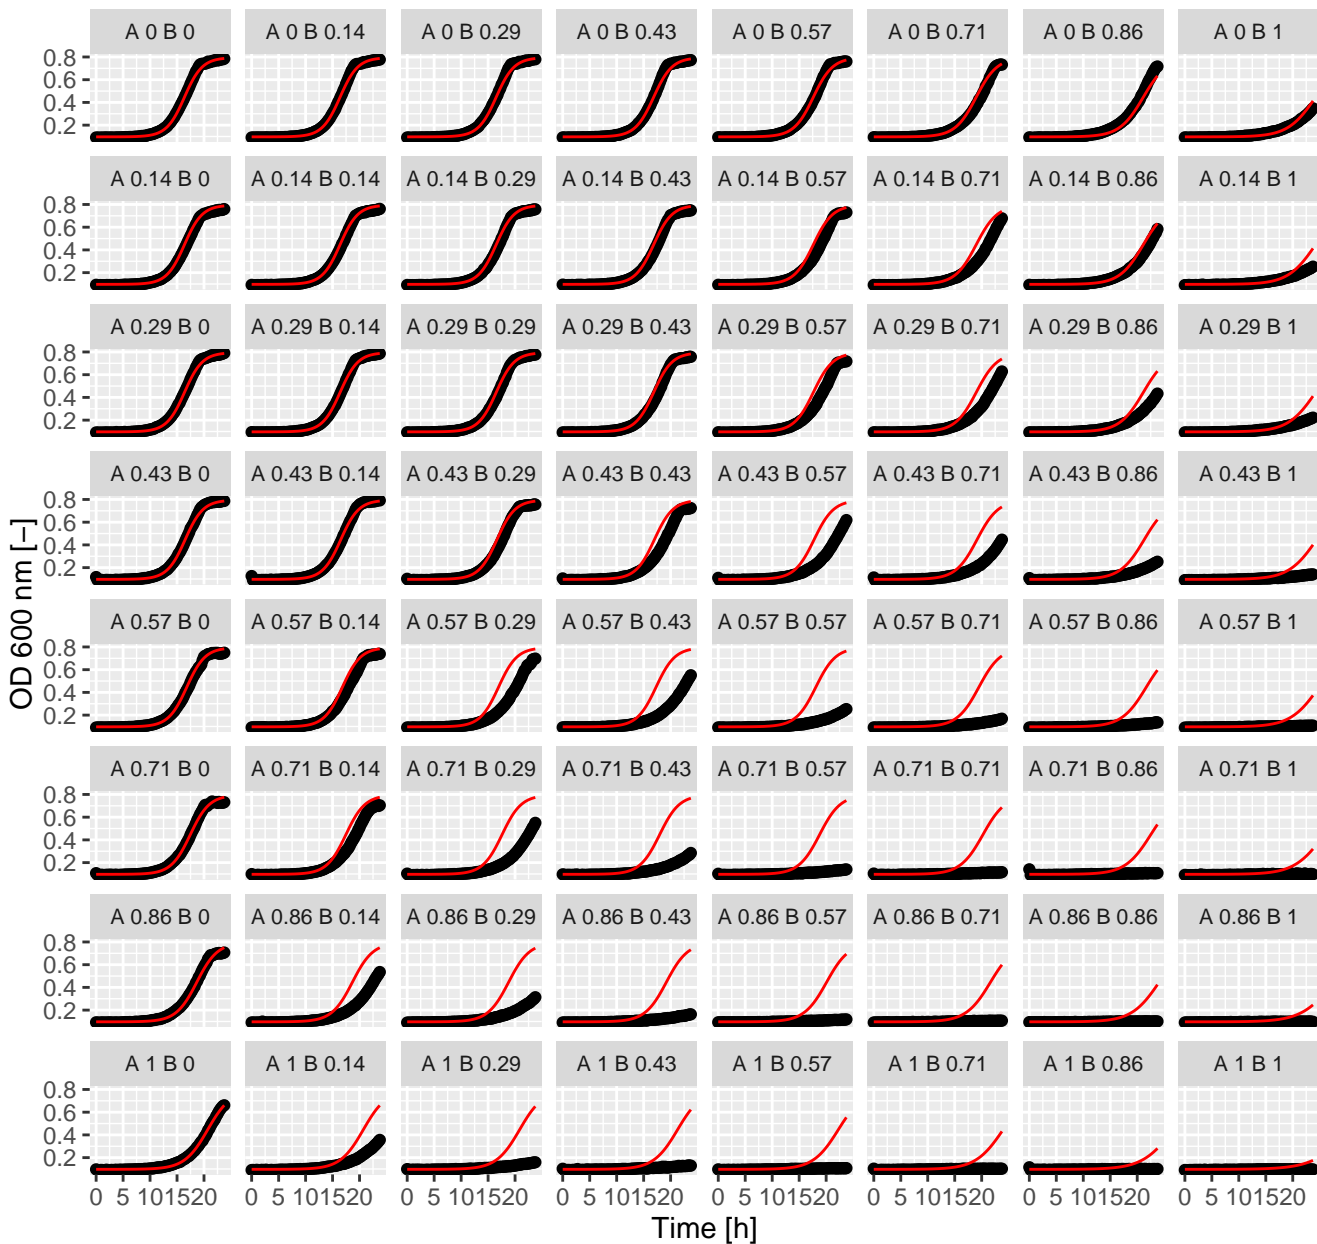

Lat. Myr (= Ax.Bx) full GPDI  
Int\_AB = -0.62 and Int\_BA = -0.18 at EC50

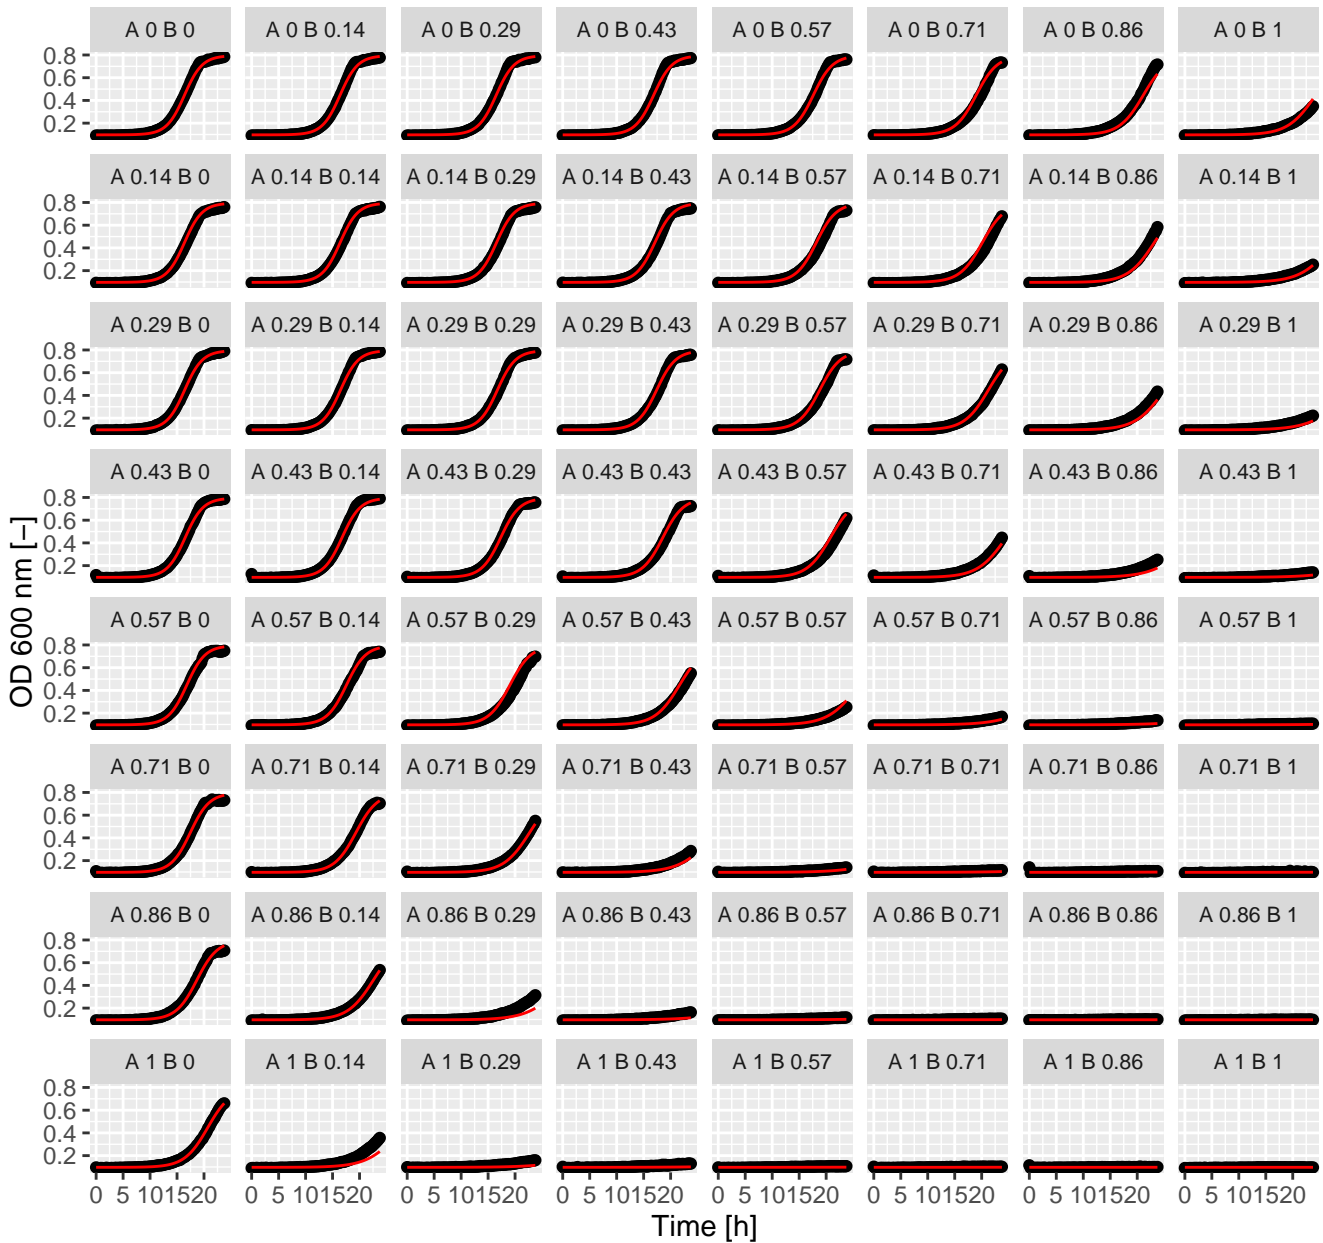



Lat.MMS (= Ax.Bx) exp. additivity (BI)  
 Int\_AB = 0 and Int\_BA = 0 at EC50

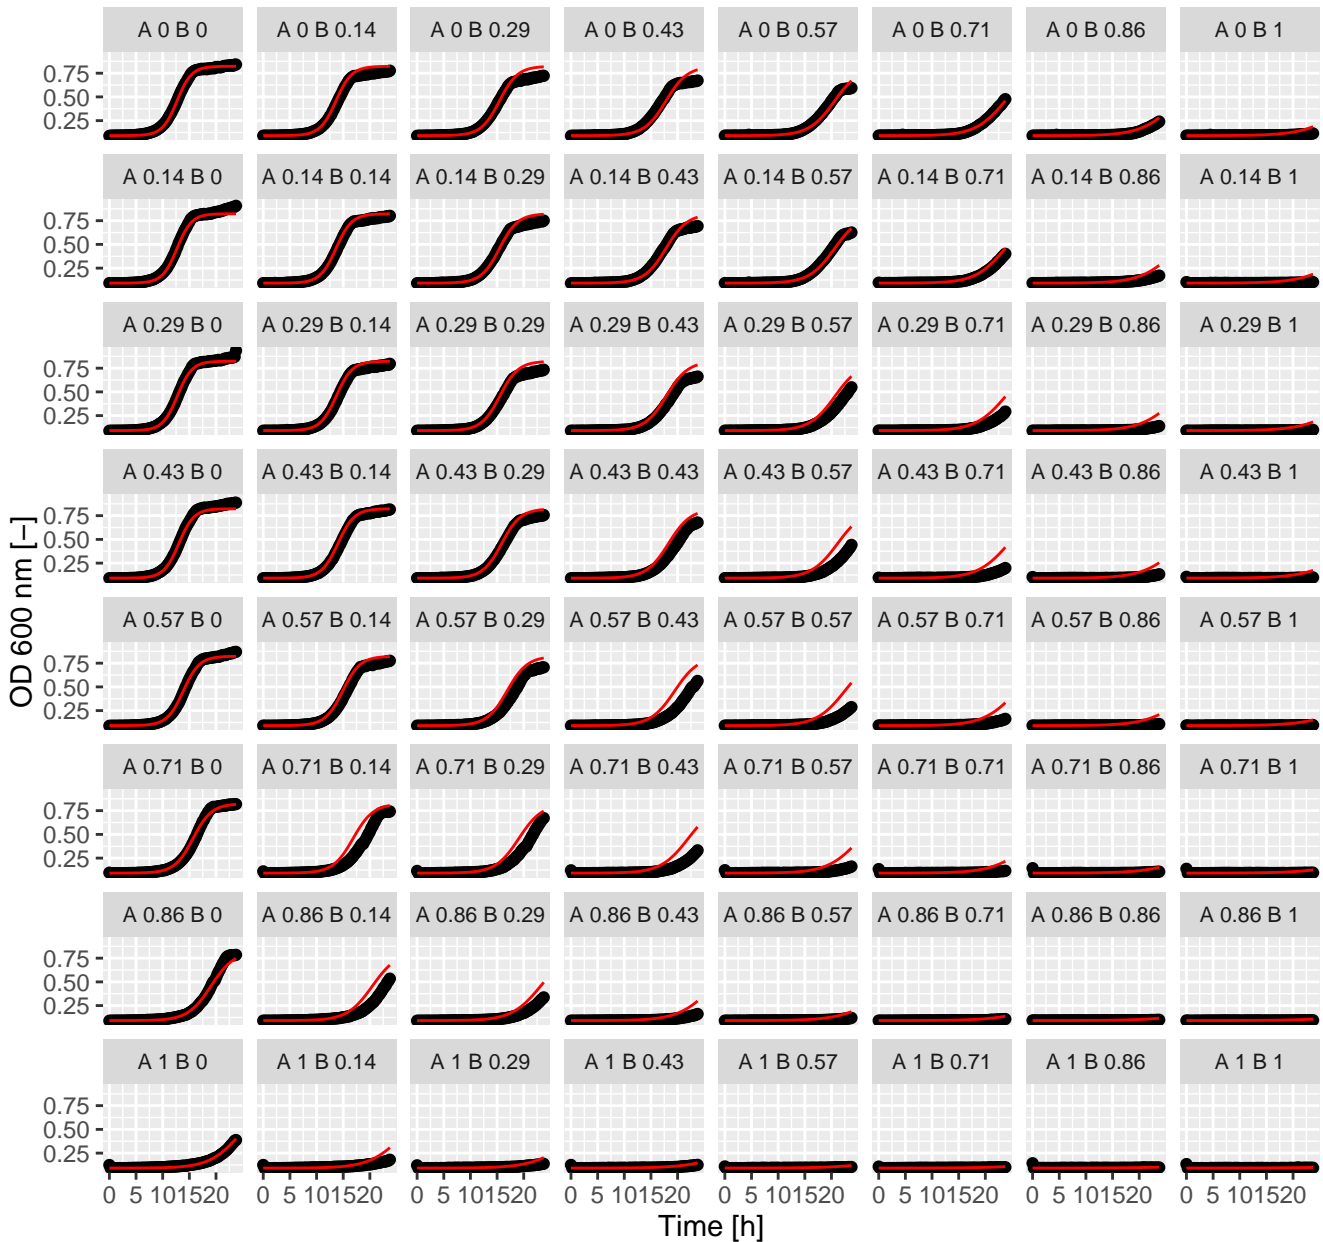

Lat.MMS (= Ax.Bx) full GPDI  
Int\_AB = -0.05 and Int\_BA = -0.28 at EC50

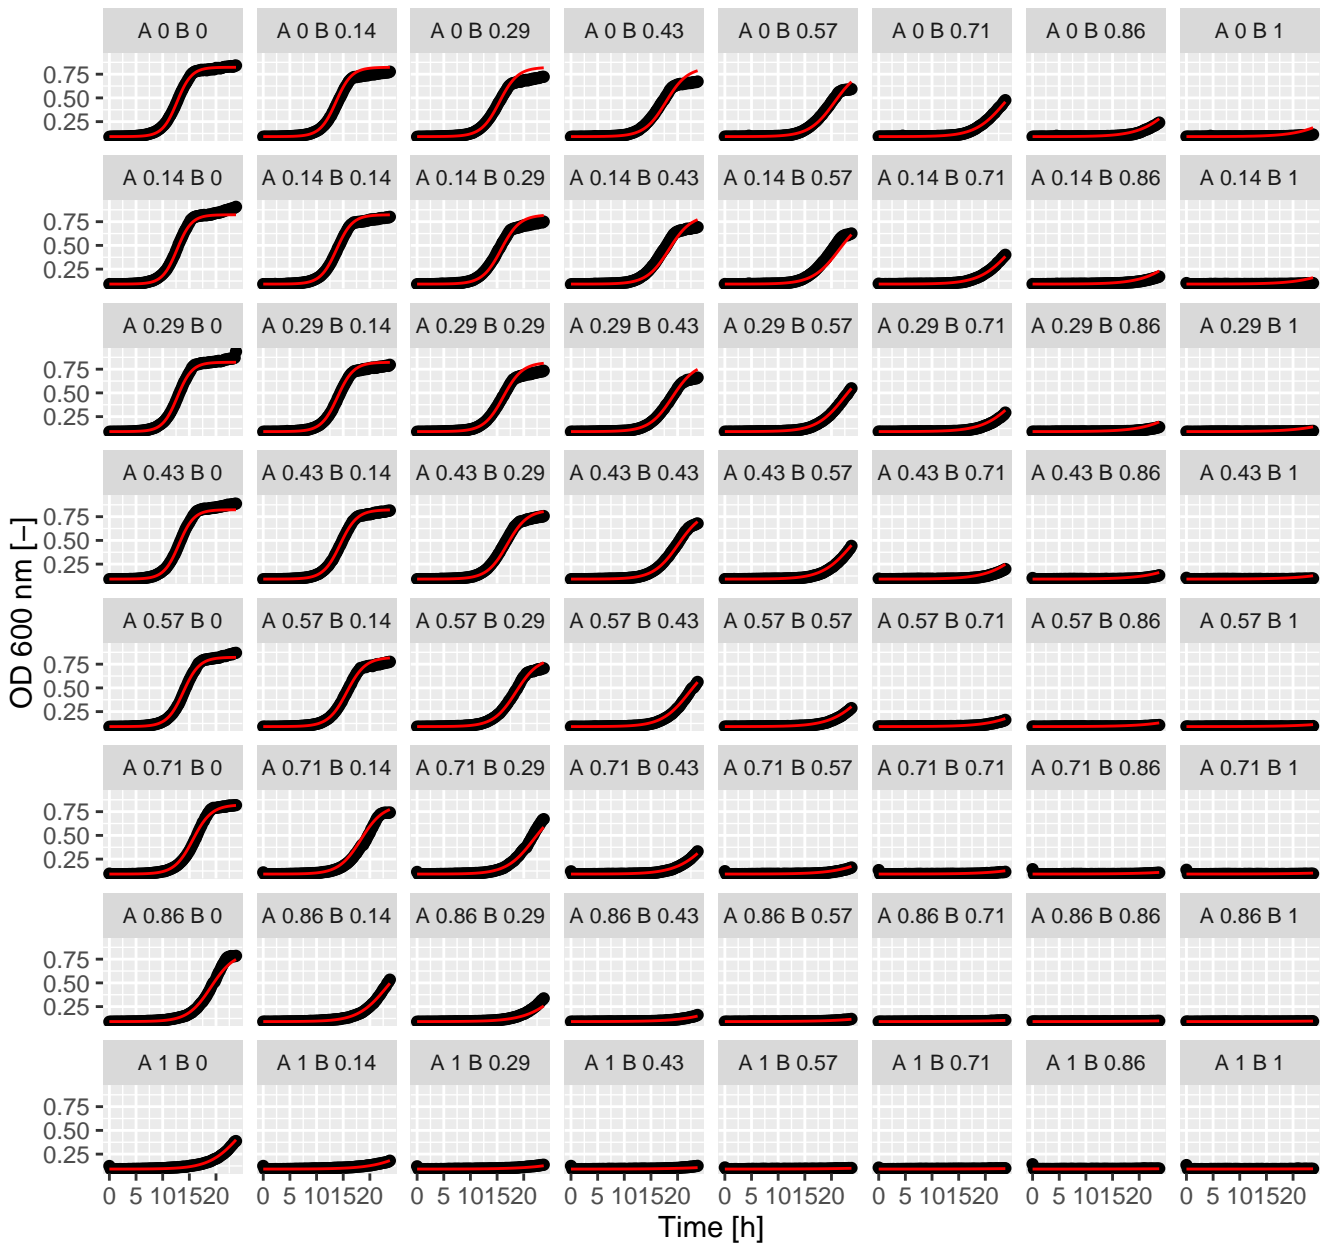

Lat.Met (= Ax.Bx) exp. additivity (BI)  
Int\_AB = 0 and Int\_BA = 0 at EC50

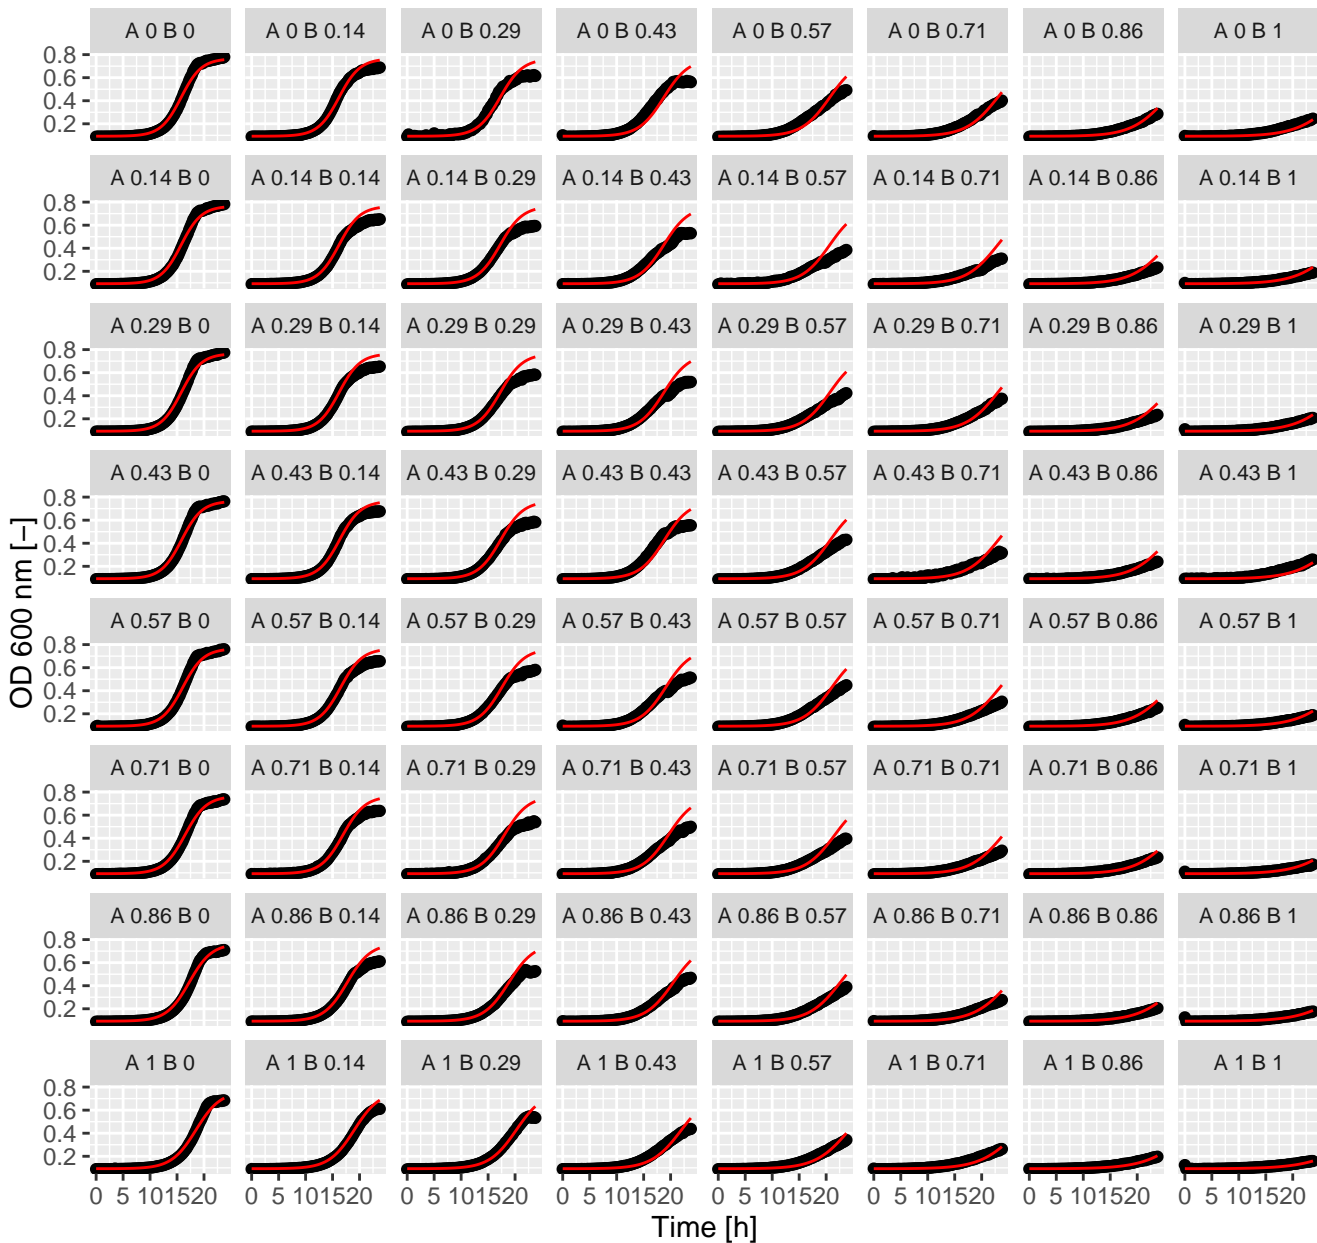

Lat.Met (= Ax.Bx) full GPDI  
Int\_AB = -0.01 and Int\_BA = -0.12 at EC50

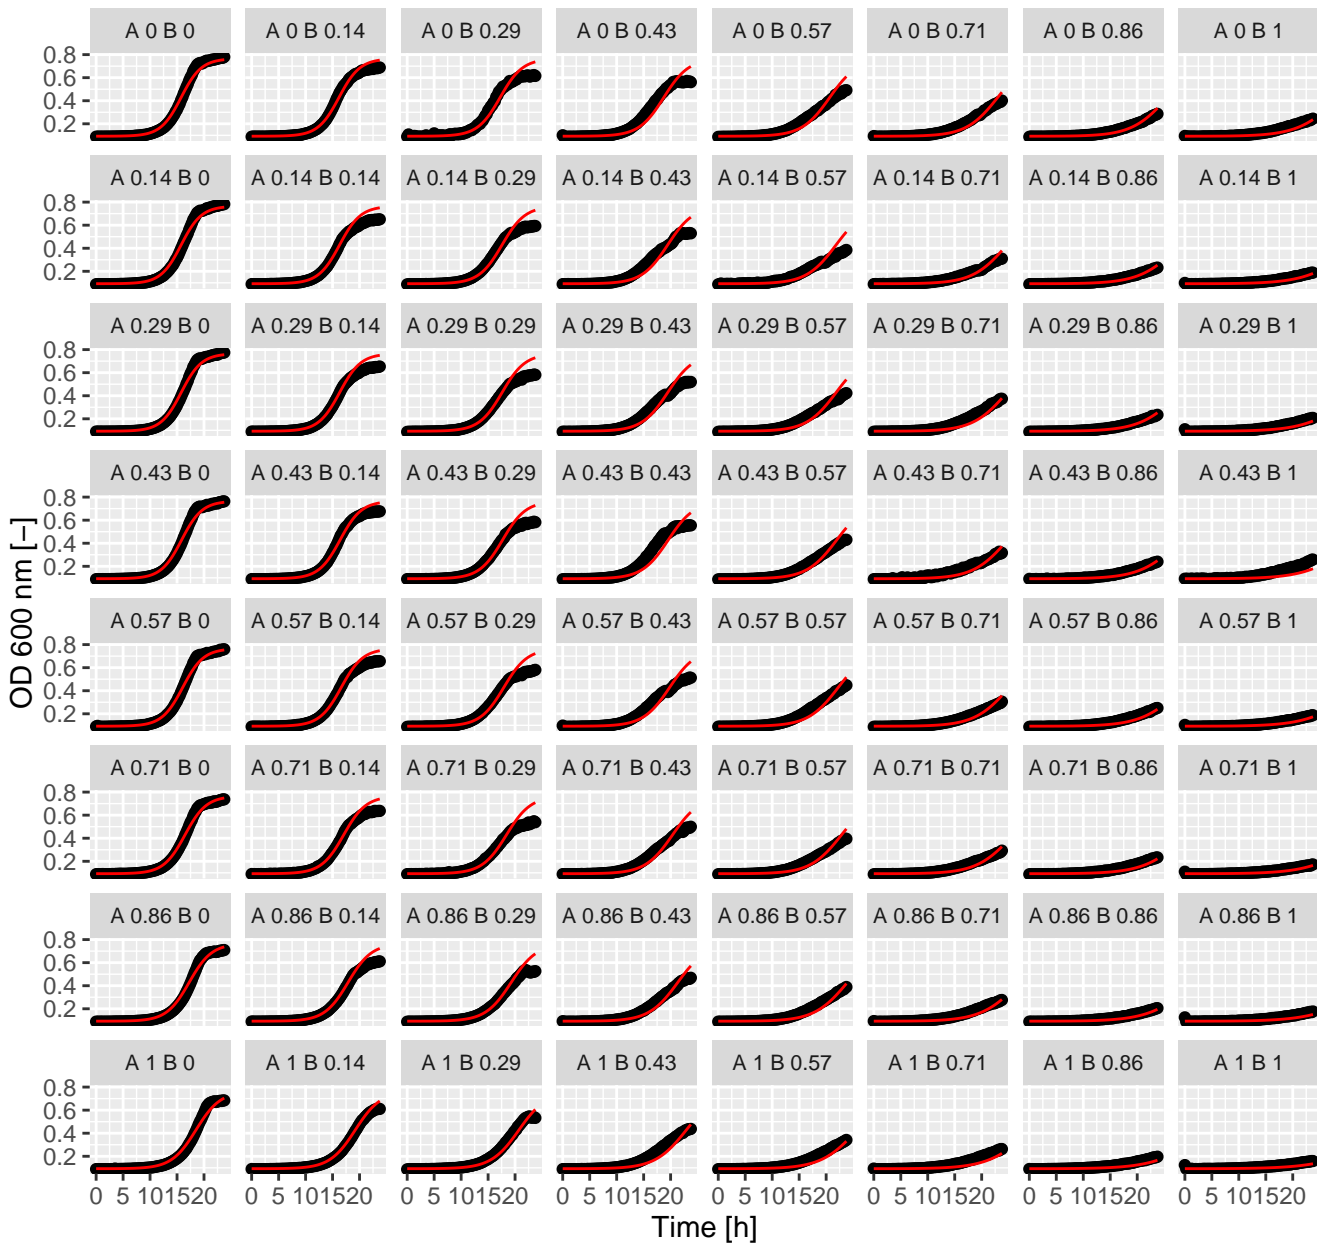

Lat.Lat (= Ax.Bx) exp. additivity (BI)  
Int\_AB = 0 and Int\_BA = 0 at EC50

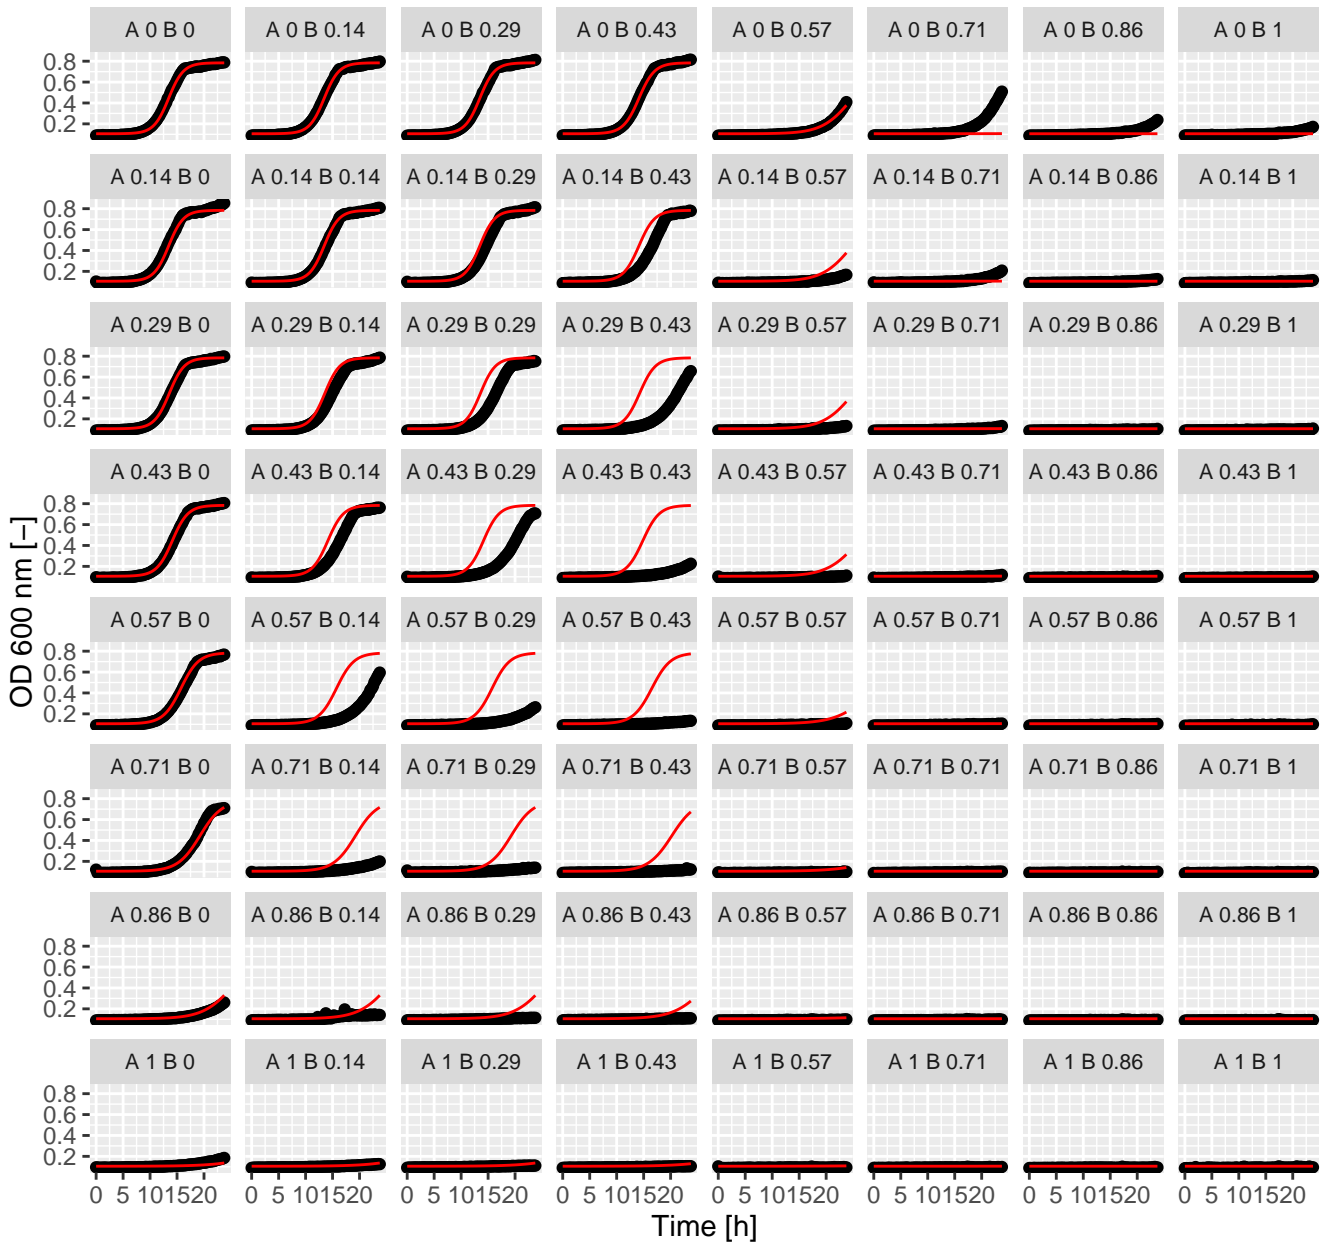

Lat.Lat (= Ax.Bx) full GPDI  
Int\_AB = -0.55 and Int\_BA = -0.22 at EC50

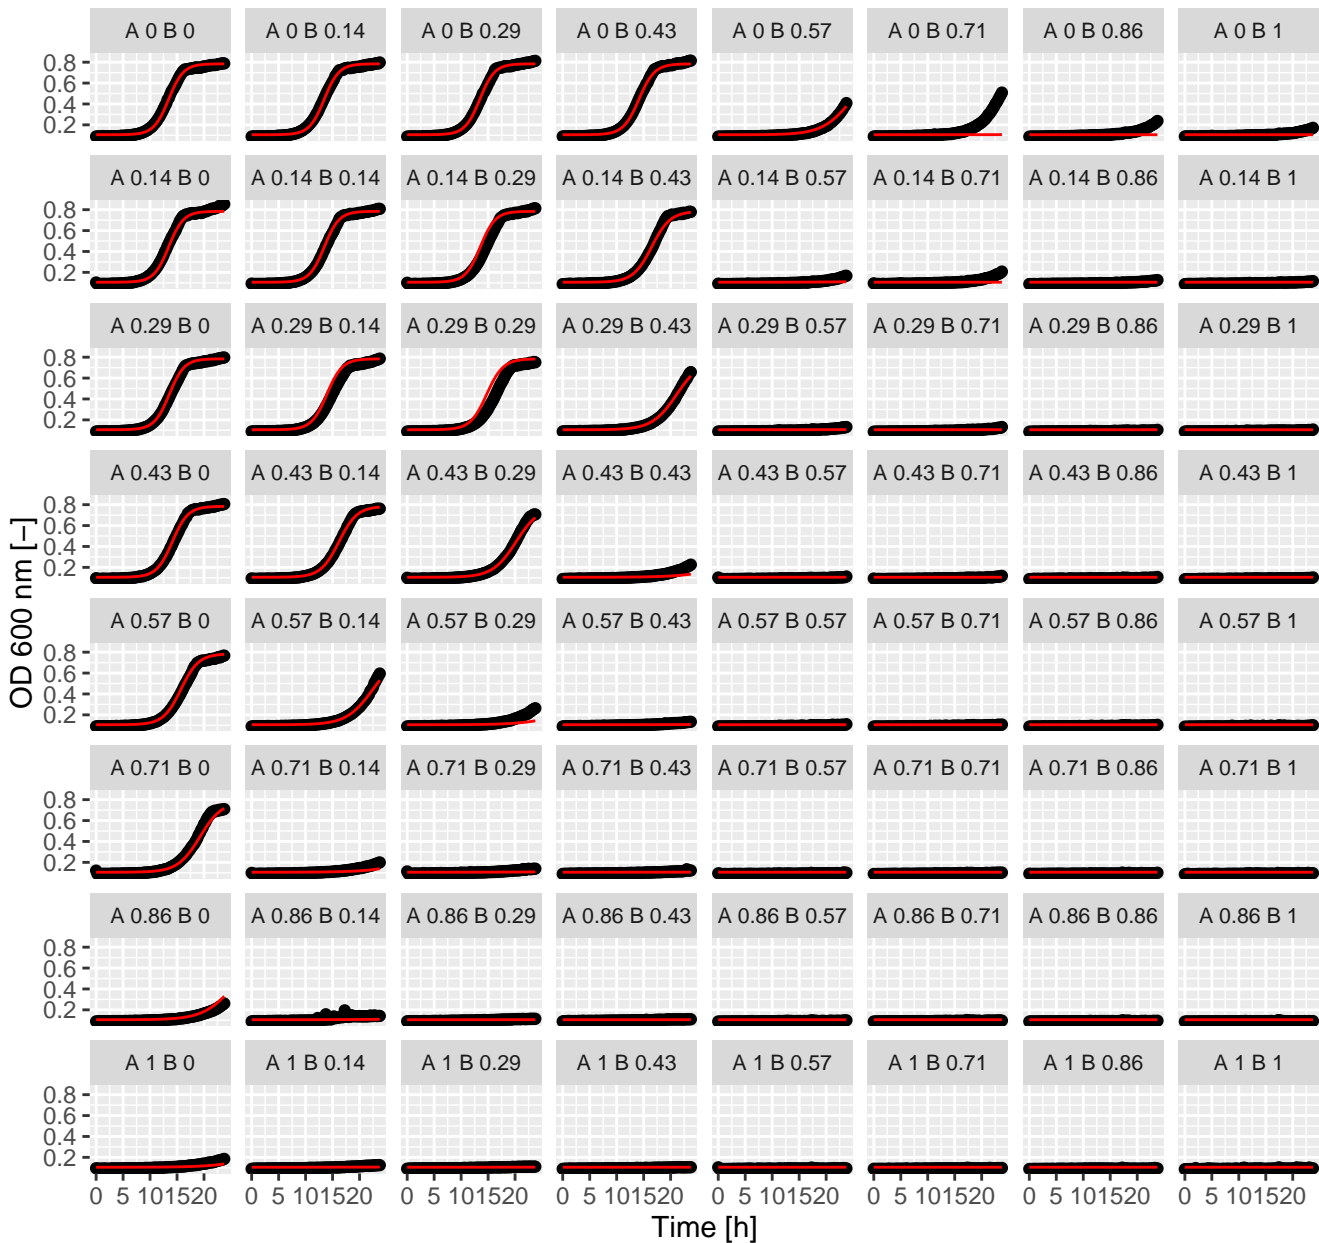

Hyg.Sta (= Ax.Bx) exp. additivity (BI)  
Int\_AB = 0 and Int\_BA = 0 at EC50

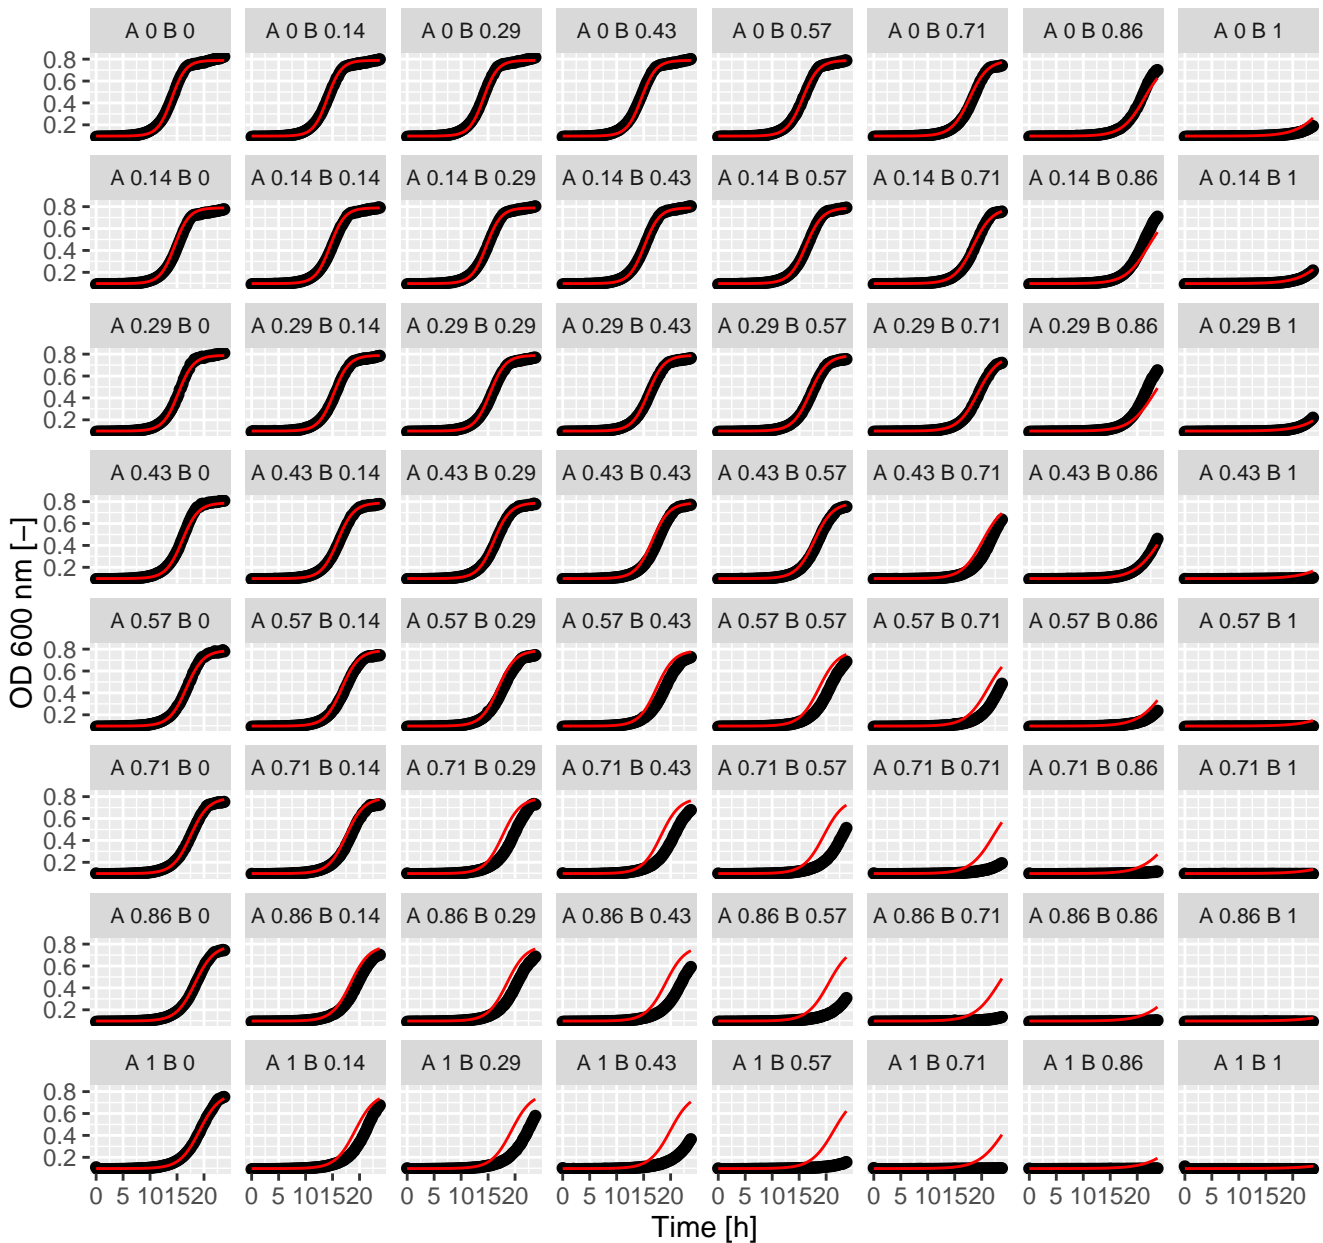

Hyg.Sta (= Ax.Bx) full GPDI  
Int\_AB = -0.61 and Int\_BA = 0.19 at EC50

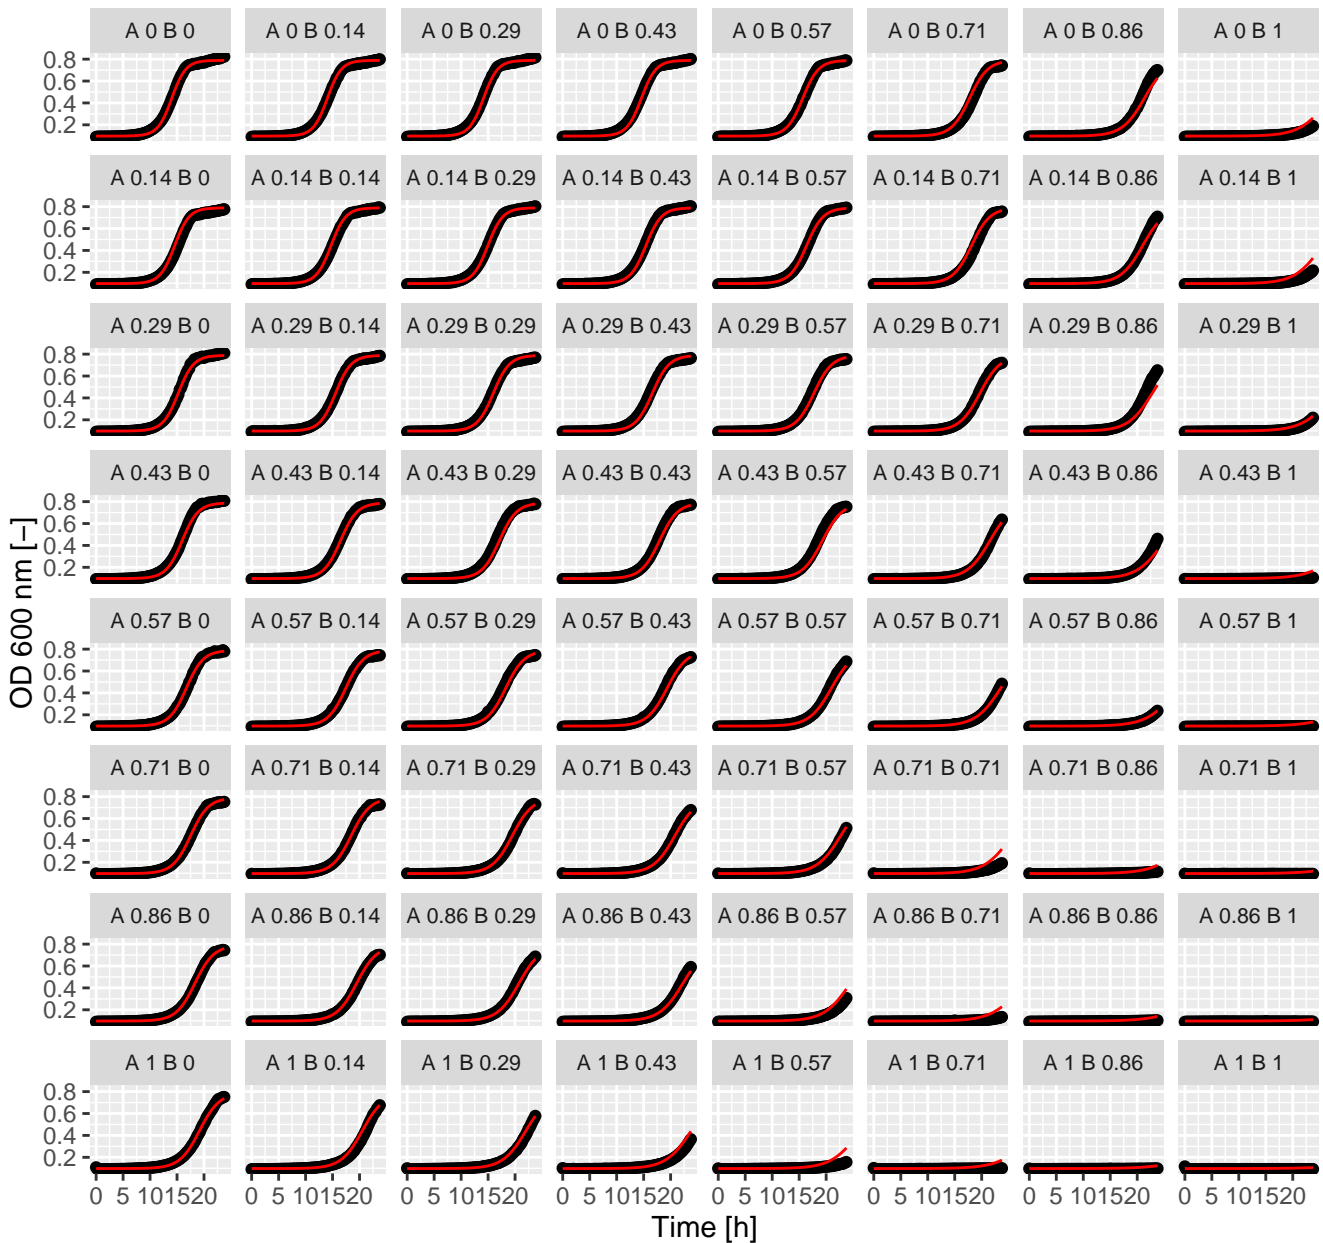



Hyg.Rap (= Ax.Bx) exp. additivity (BI)  
 Int\_AB = 0 and Int\_BA = 0 at EC50

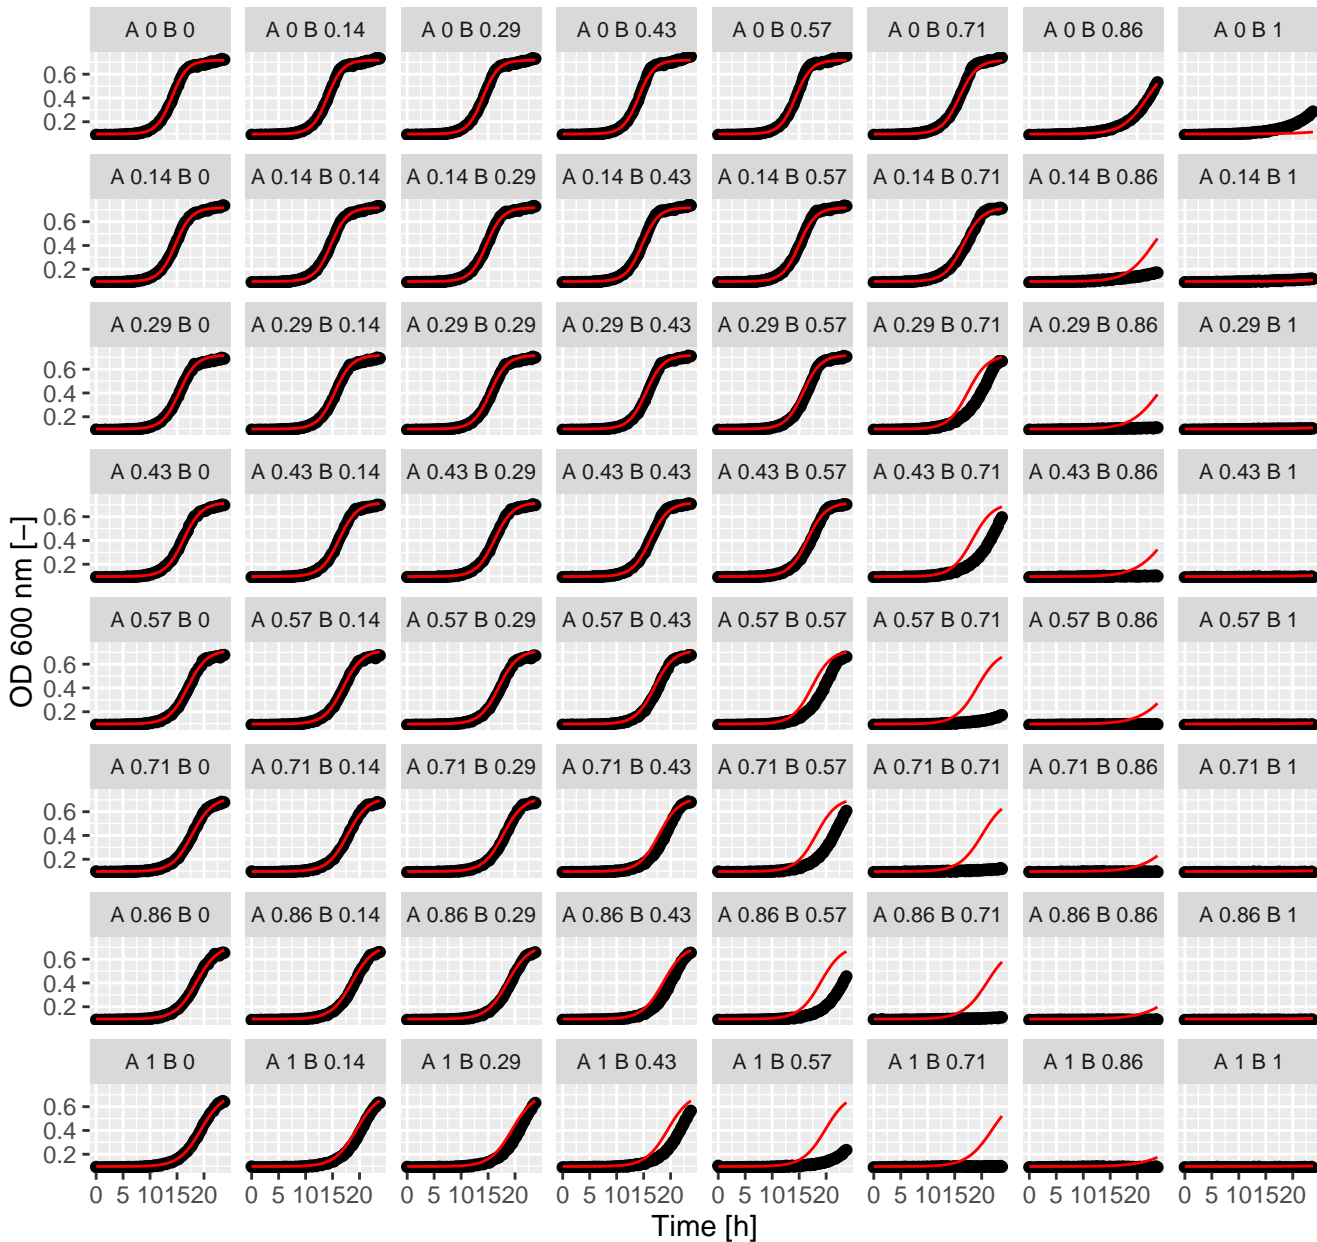

Hyg.Rap (= Ax.Bx) full GPDI  
Int\_AB = -0.24 and Int\_BA = -0.41 at EC50

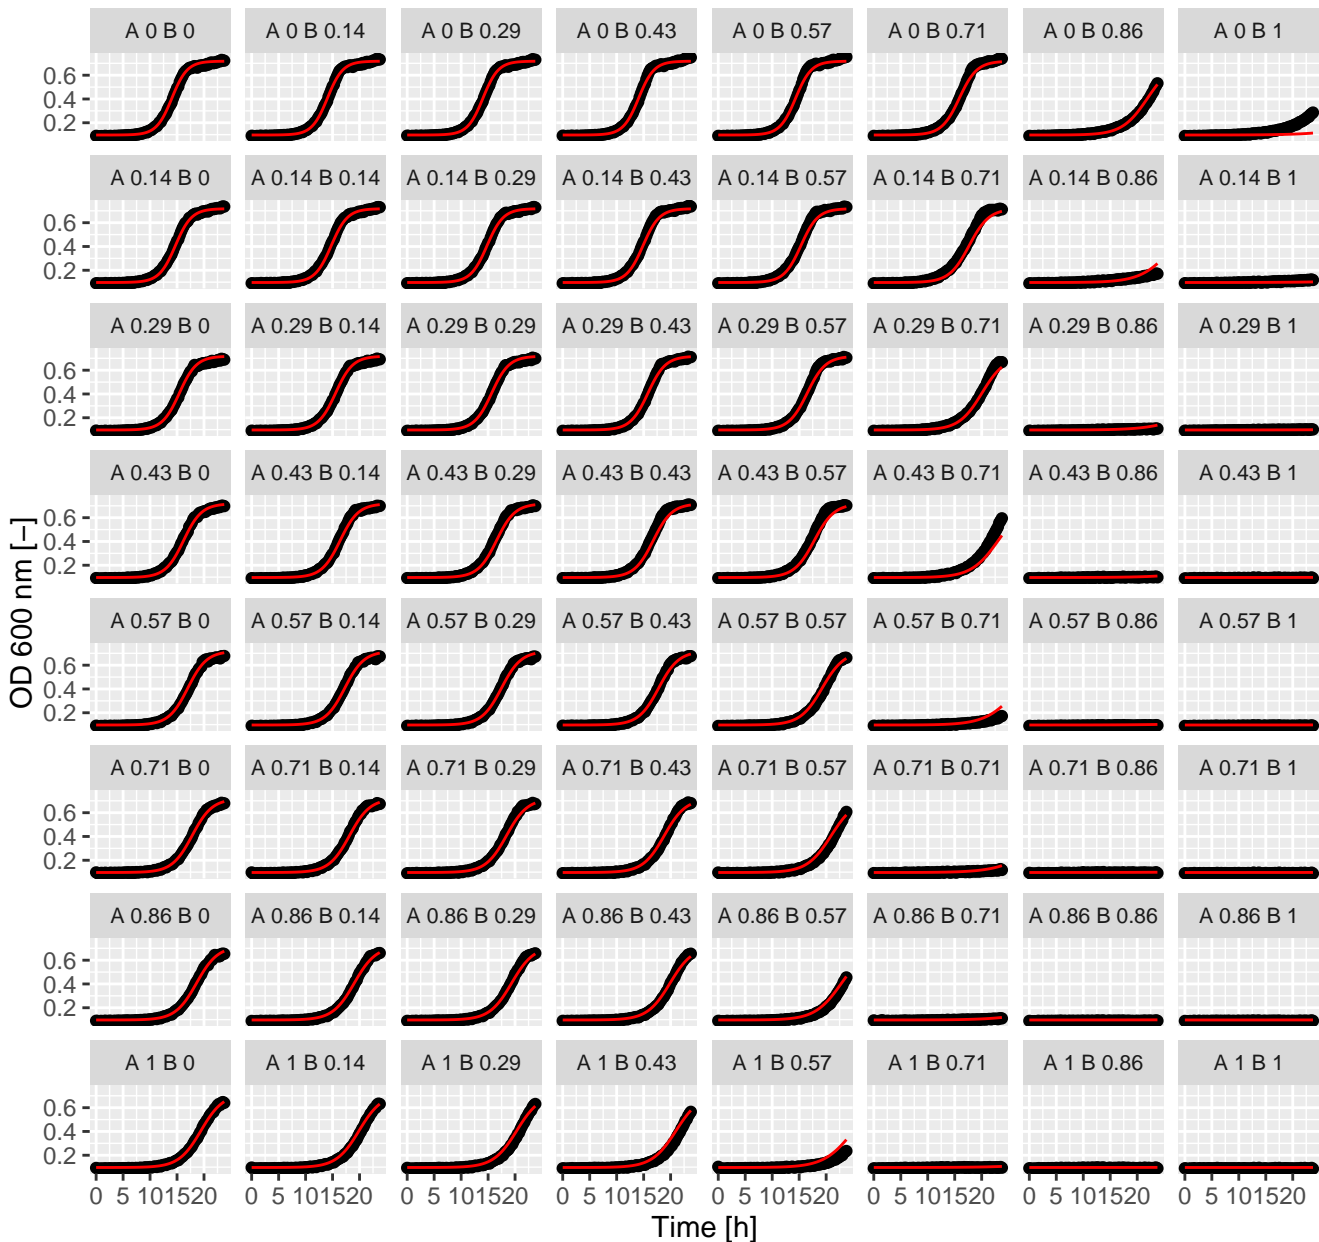

Hyg.Rad (= Ax.Bx) exp. additivity (BI)  
Int\_AB = 0 and Int\_BA = 0 at EC50

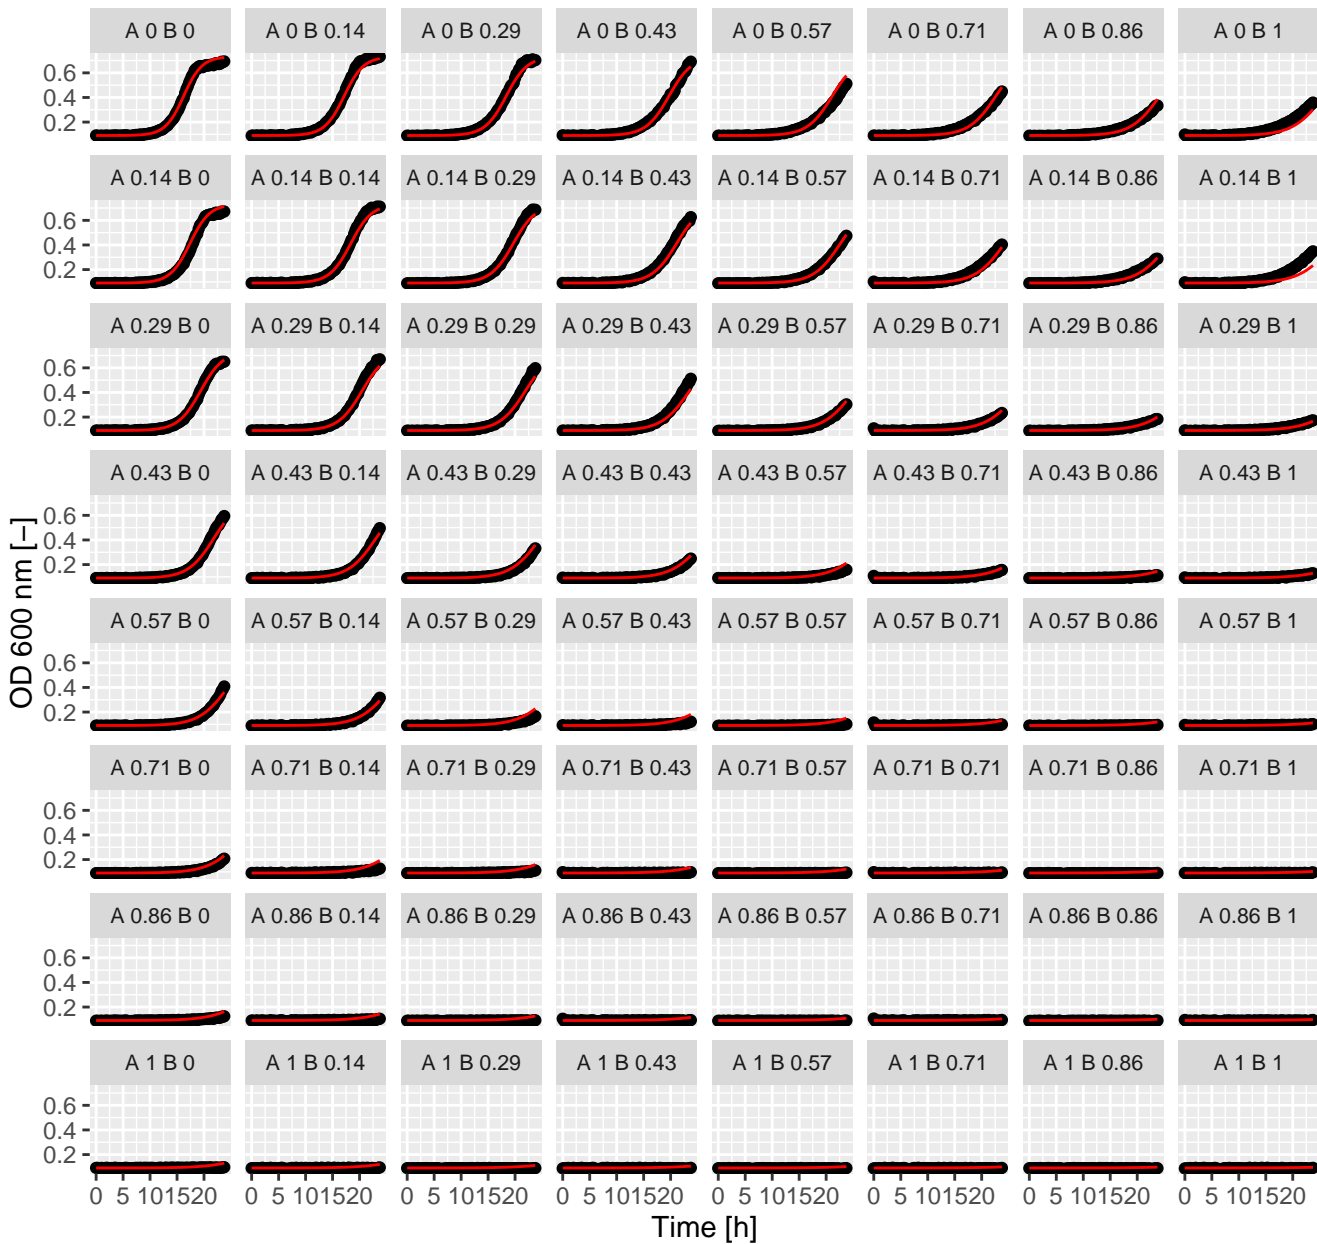

Hyg.Rad (= Ax.Bx) full GPDI  
Int\_AB = -0.56 and Int\_BA = 1.74 at EC50

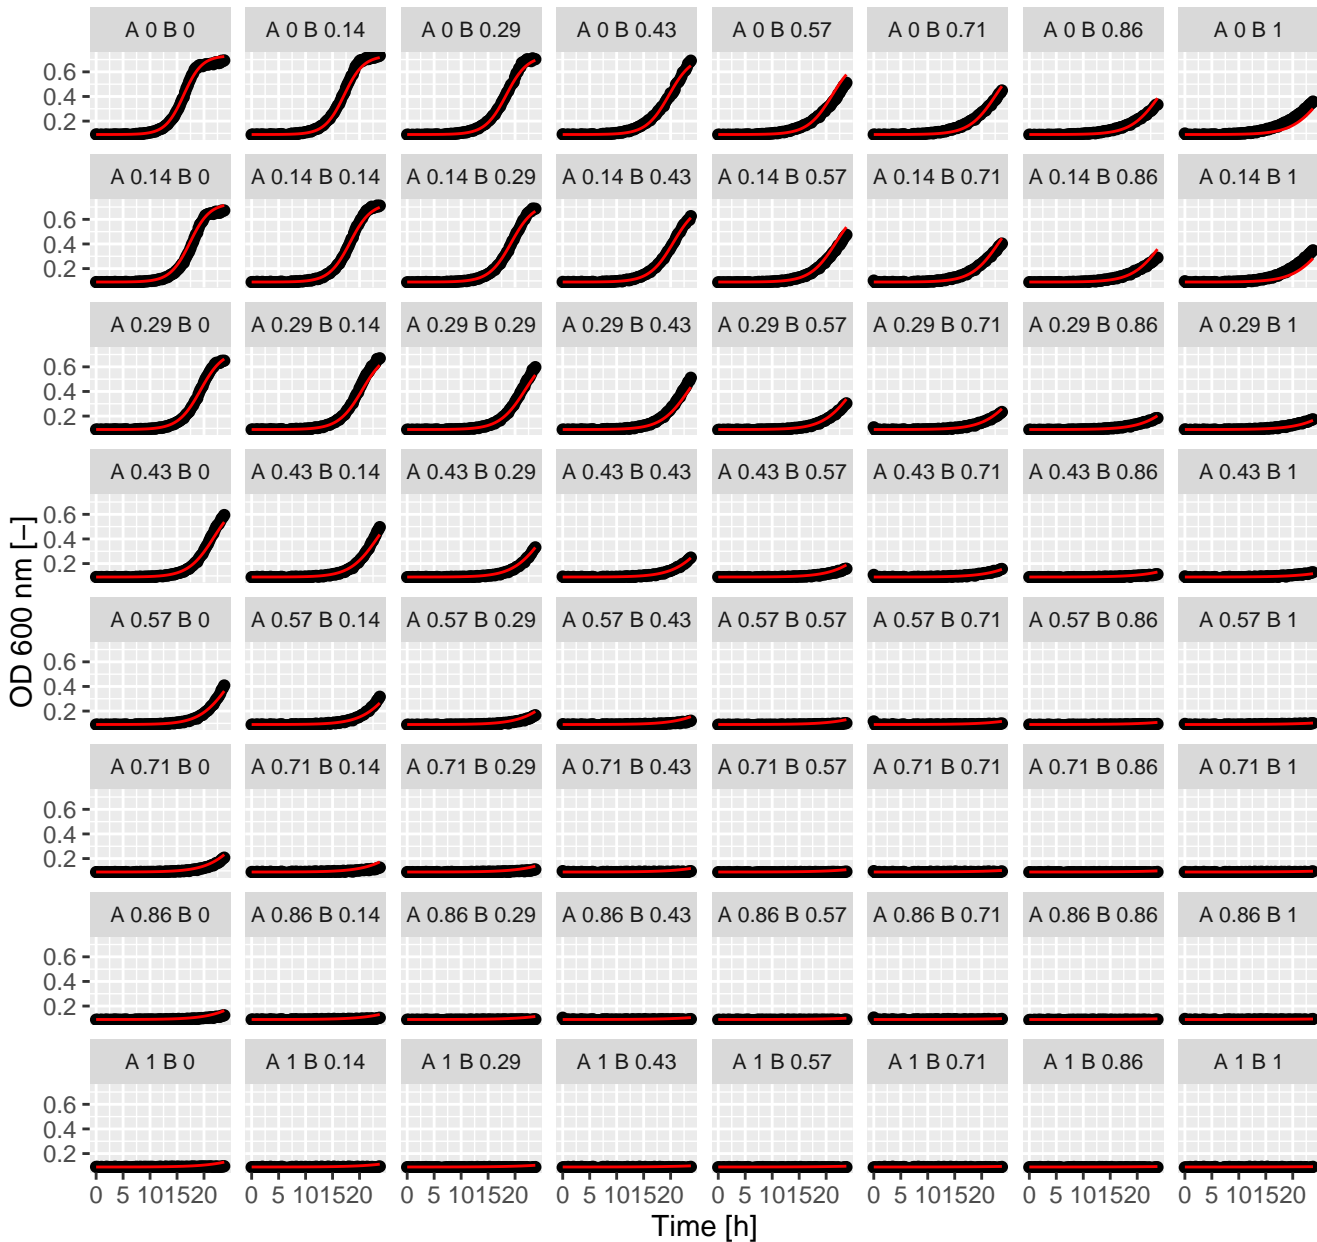

Hyg.Myr (= Ax.Bx) exp. additivity (BI)  
Int\_AB = 0 and Int\_BA = 0 at EC50

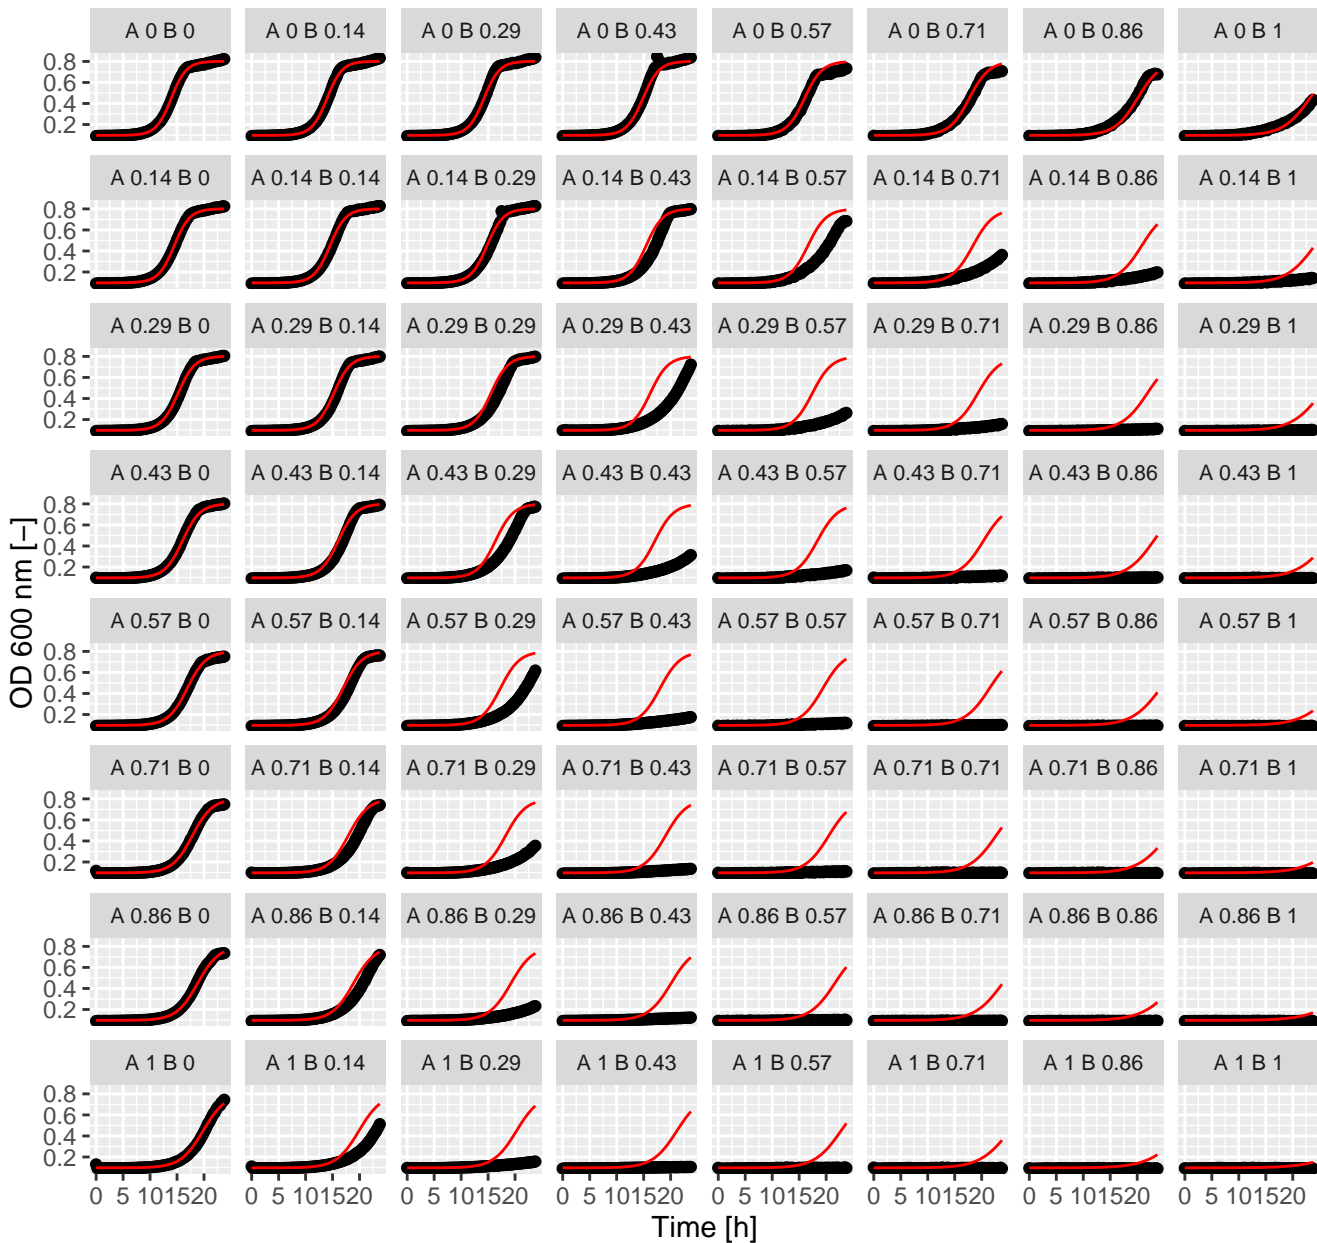

Hyg.Myr (= Ax.Bx) full GPDI  
Int\_AB = -0.1 and Int\_BA = -0.77 at EC50

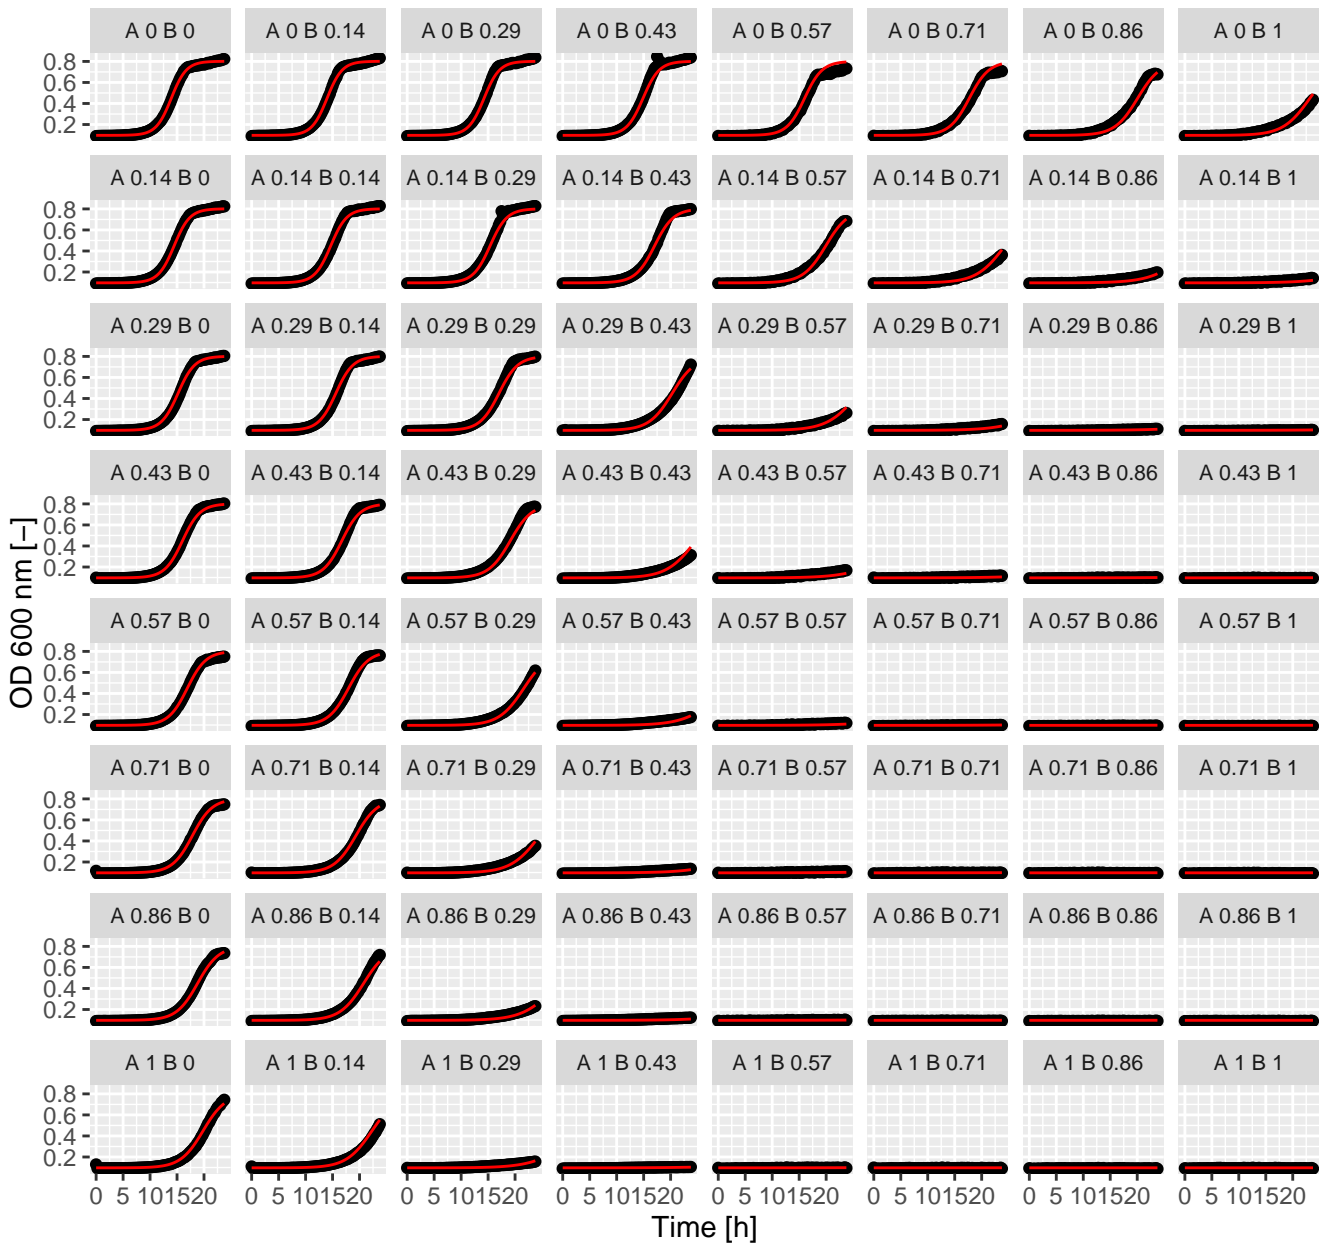

Hyg.Lat (= Ax.Bx) exp. additivity (BI)  
Int\_AB = 0 and Int\_BA = 0 at EC50

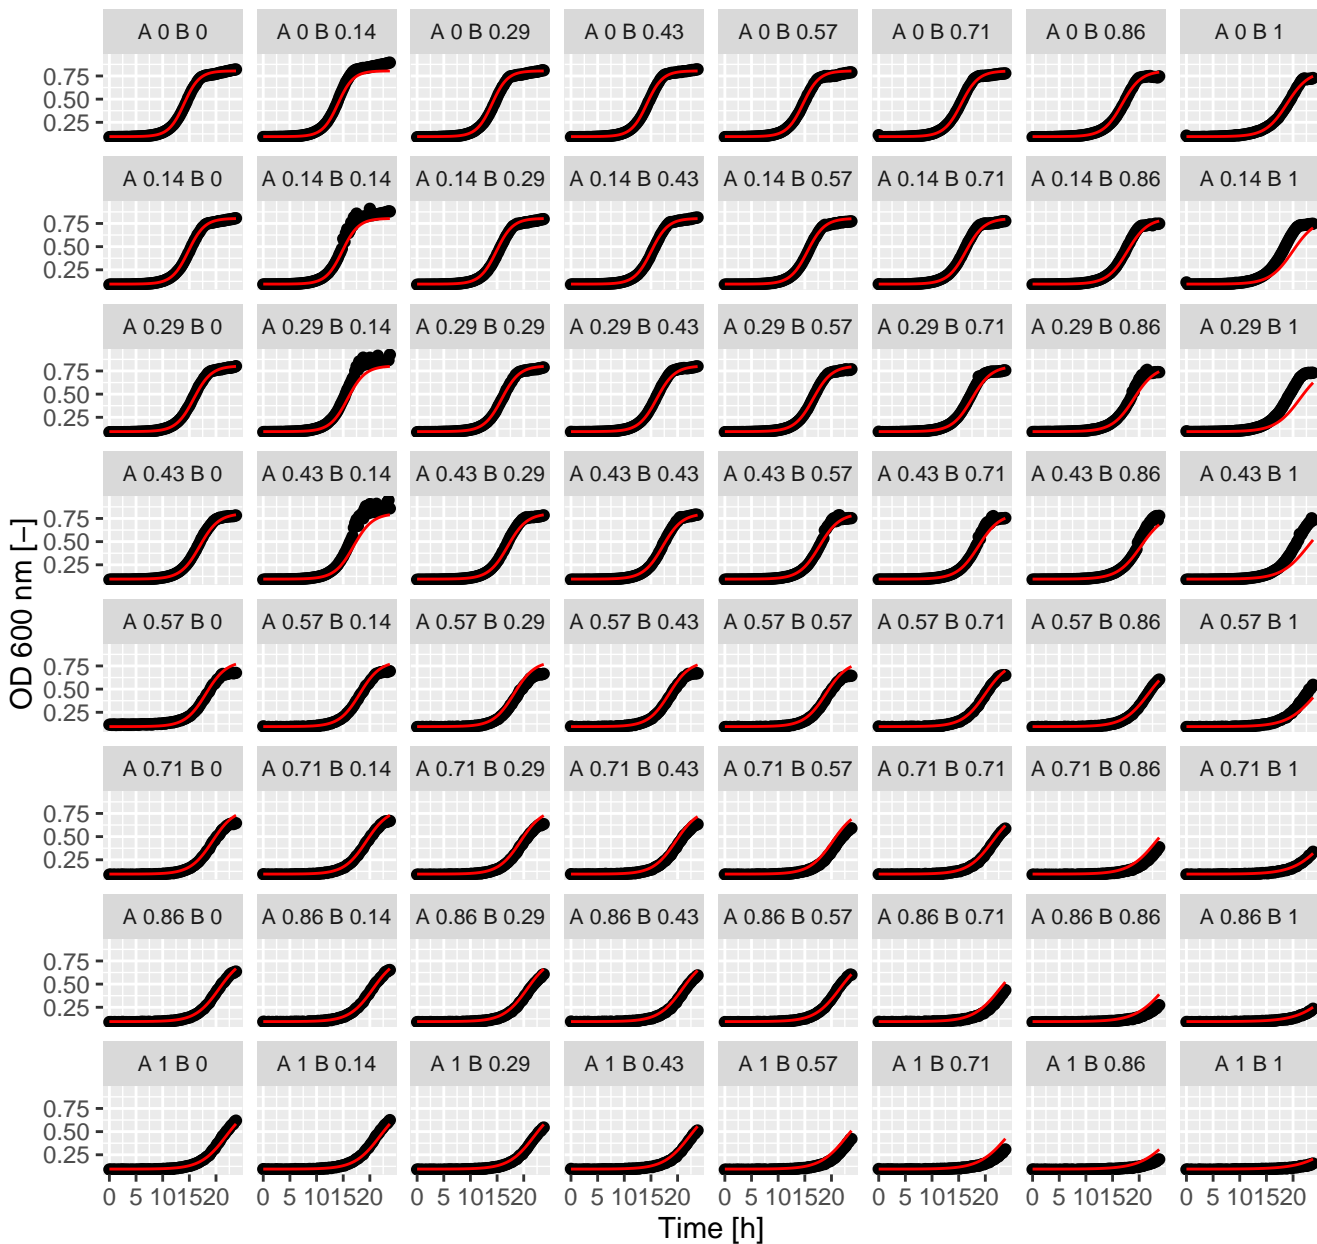

Hyg.Lat (= Ax.Bx) full GPDI  
Int\_AB = -0.3 and Int\_BA = 0.23 at EC50

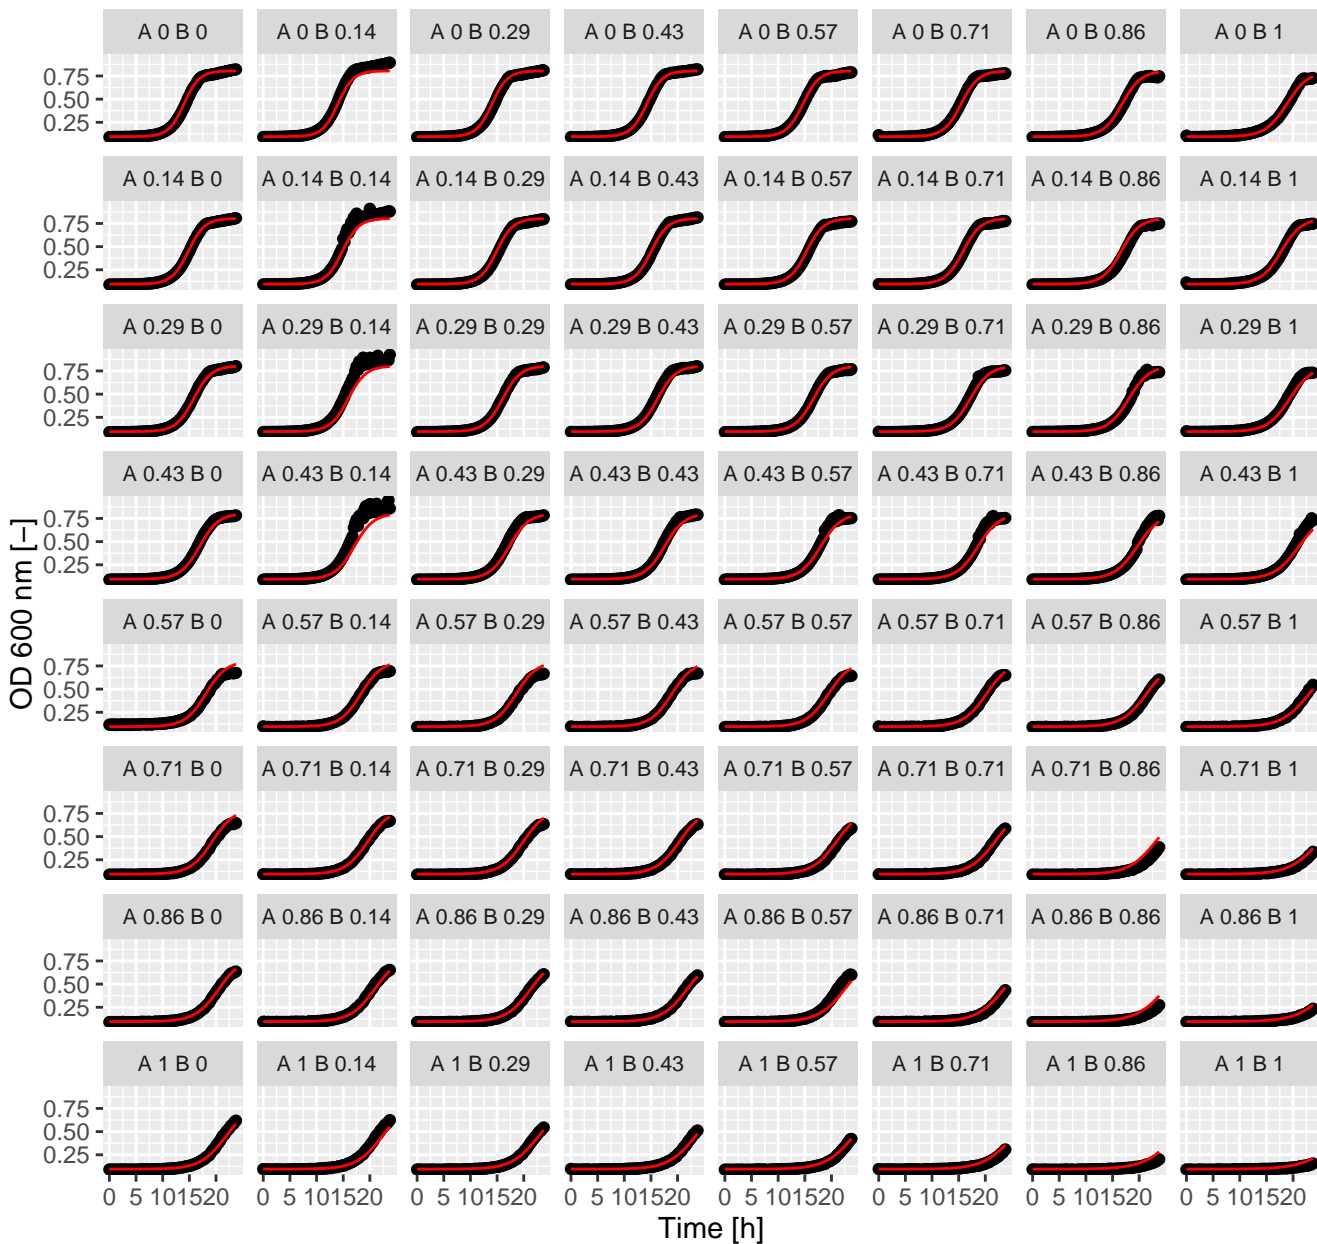



Hal.Tun (= Ax.Bx) exp. additivity (BI)  
Int\_AB = 0 and Int\_BA = 0 at EC50

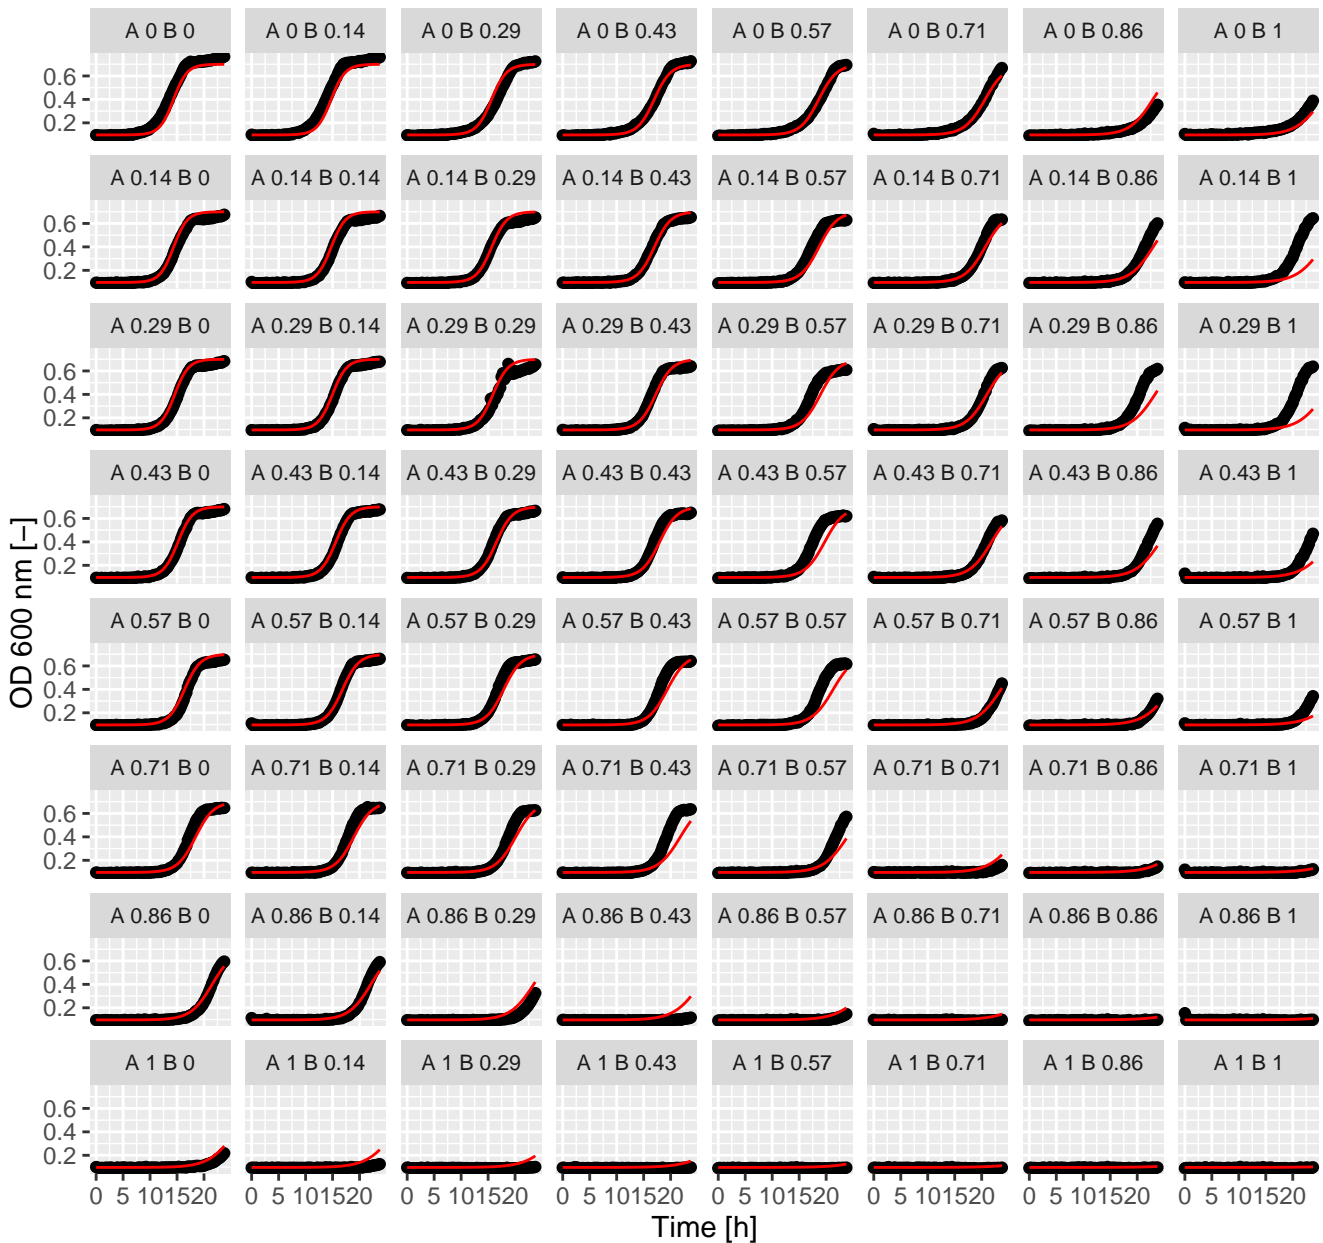

Hal.Tun (= Ax.Bx) full GPDI  
Int\_AB = -0.11 and Int\_BA = 0.26 at EC50

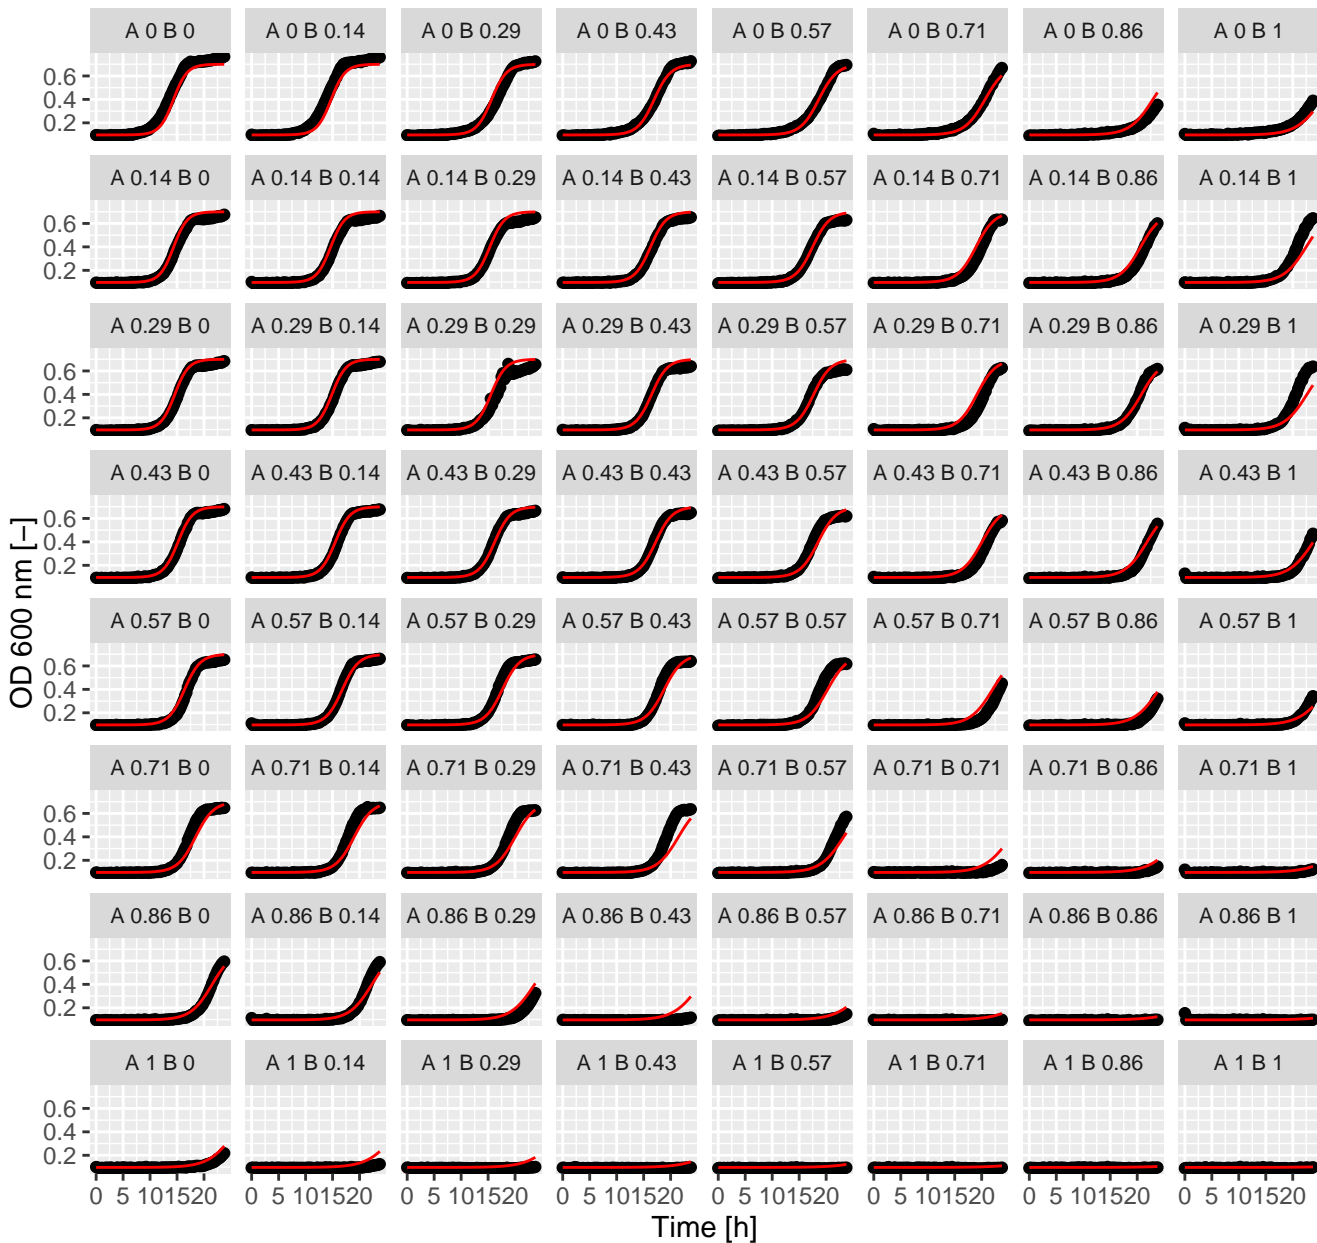

Hal.Ter (= Ax.Bx) exp. additivity (BI)  
Int\_AB = 0 and Int\_BA = 0 at EC50

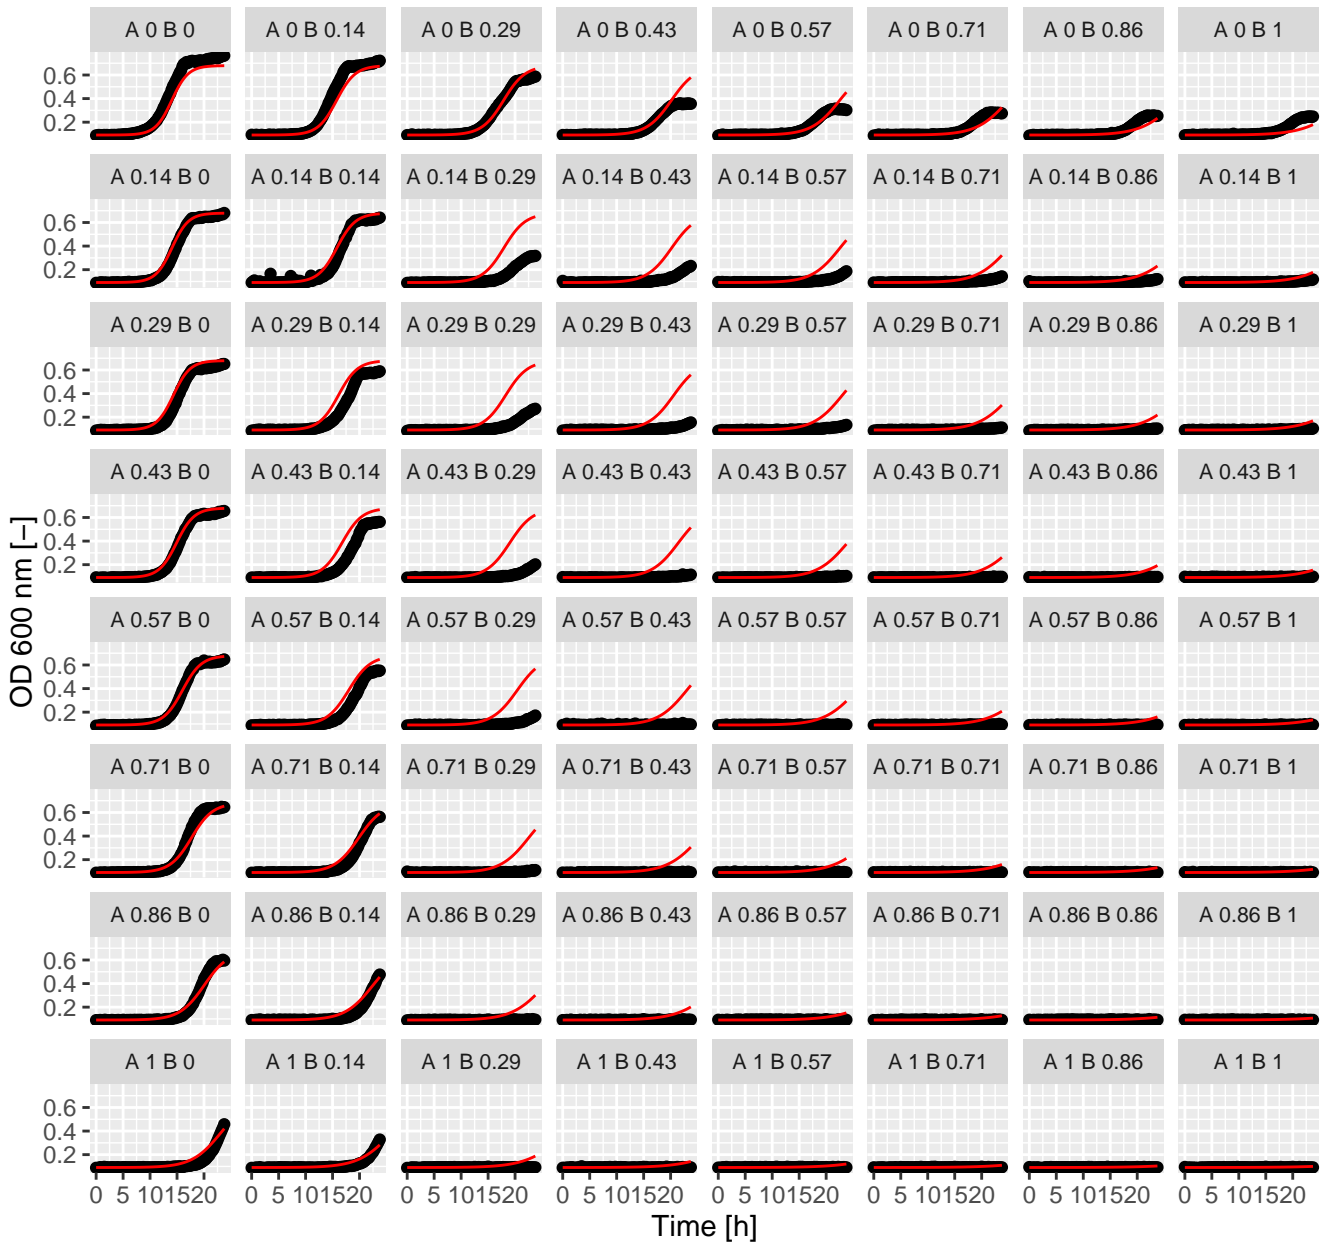

Hal.Ter (= Ax.Bx) full GPDI  
Int\_AB = 0.43 and Int\_BA = -0.67 at EC50

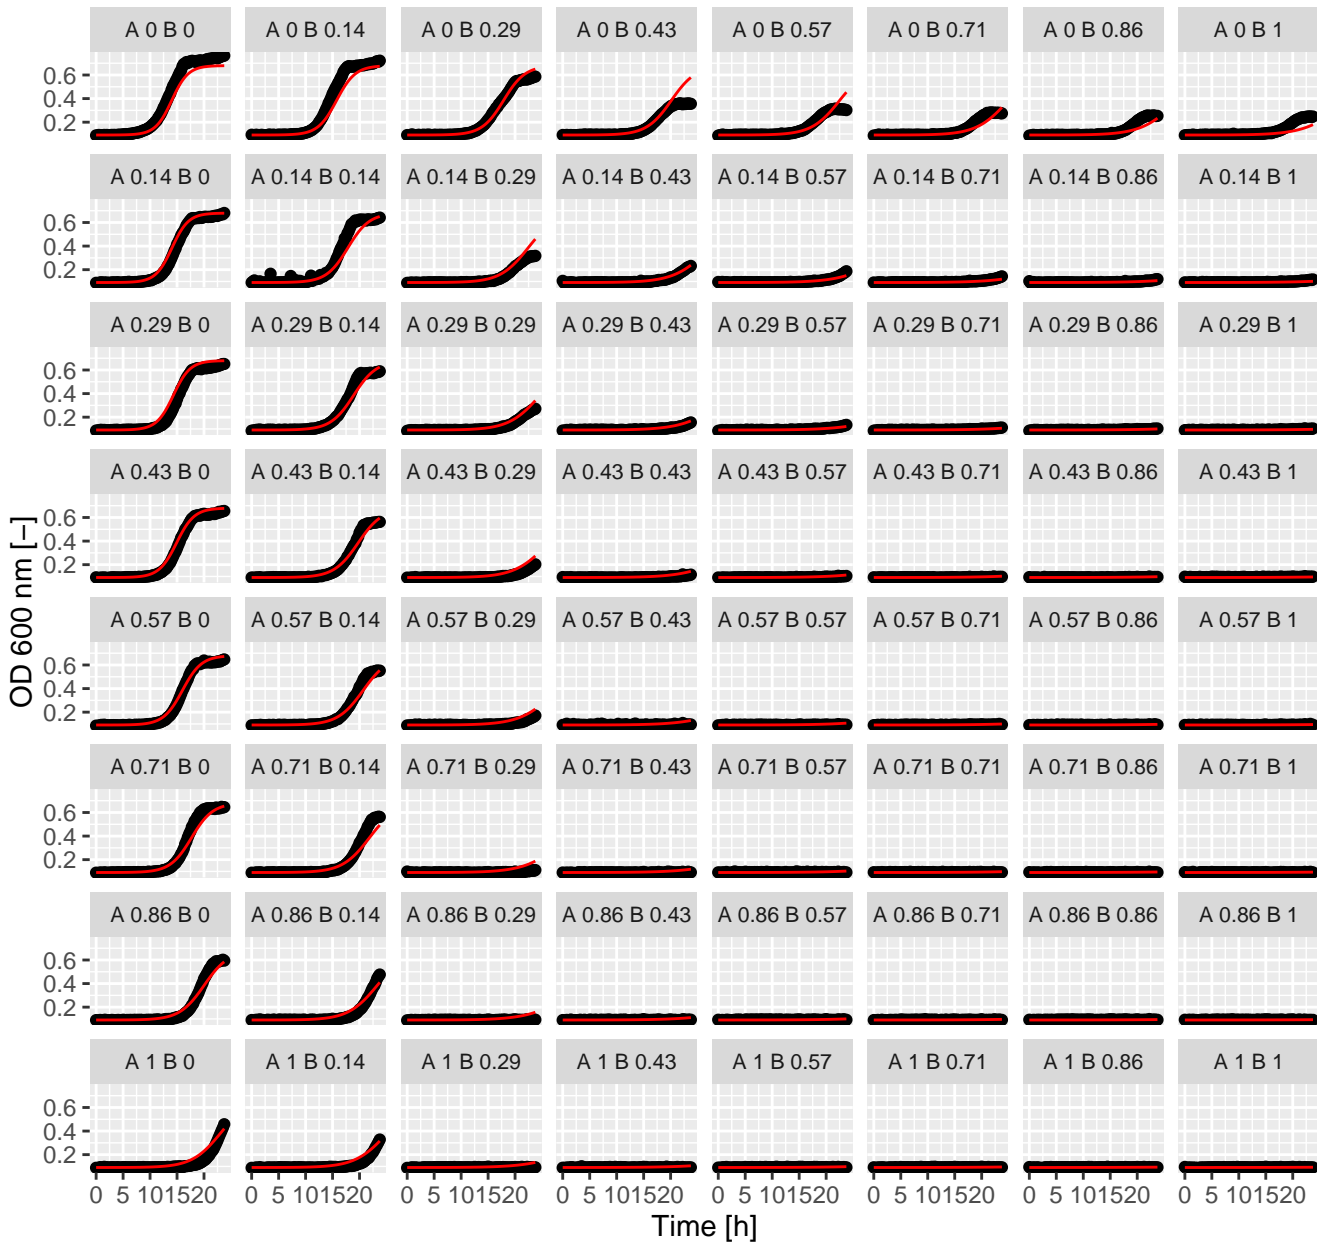

Hal.Tac (= Ax.Bx) exp. additivity (BI)  
Int\_AB = 0 and Int\_BA = 0 at EC50

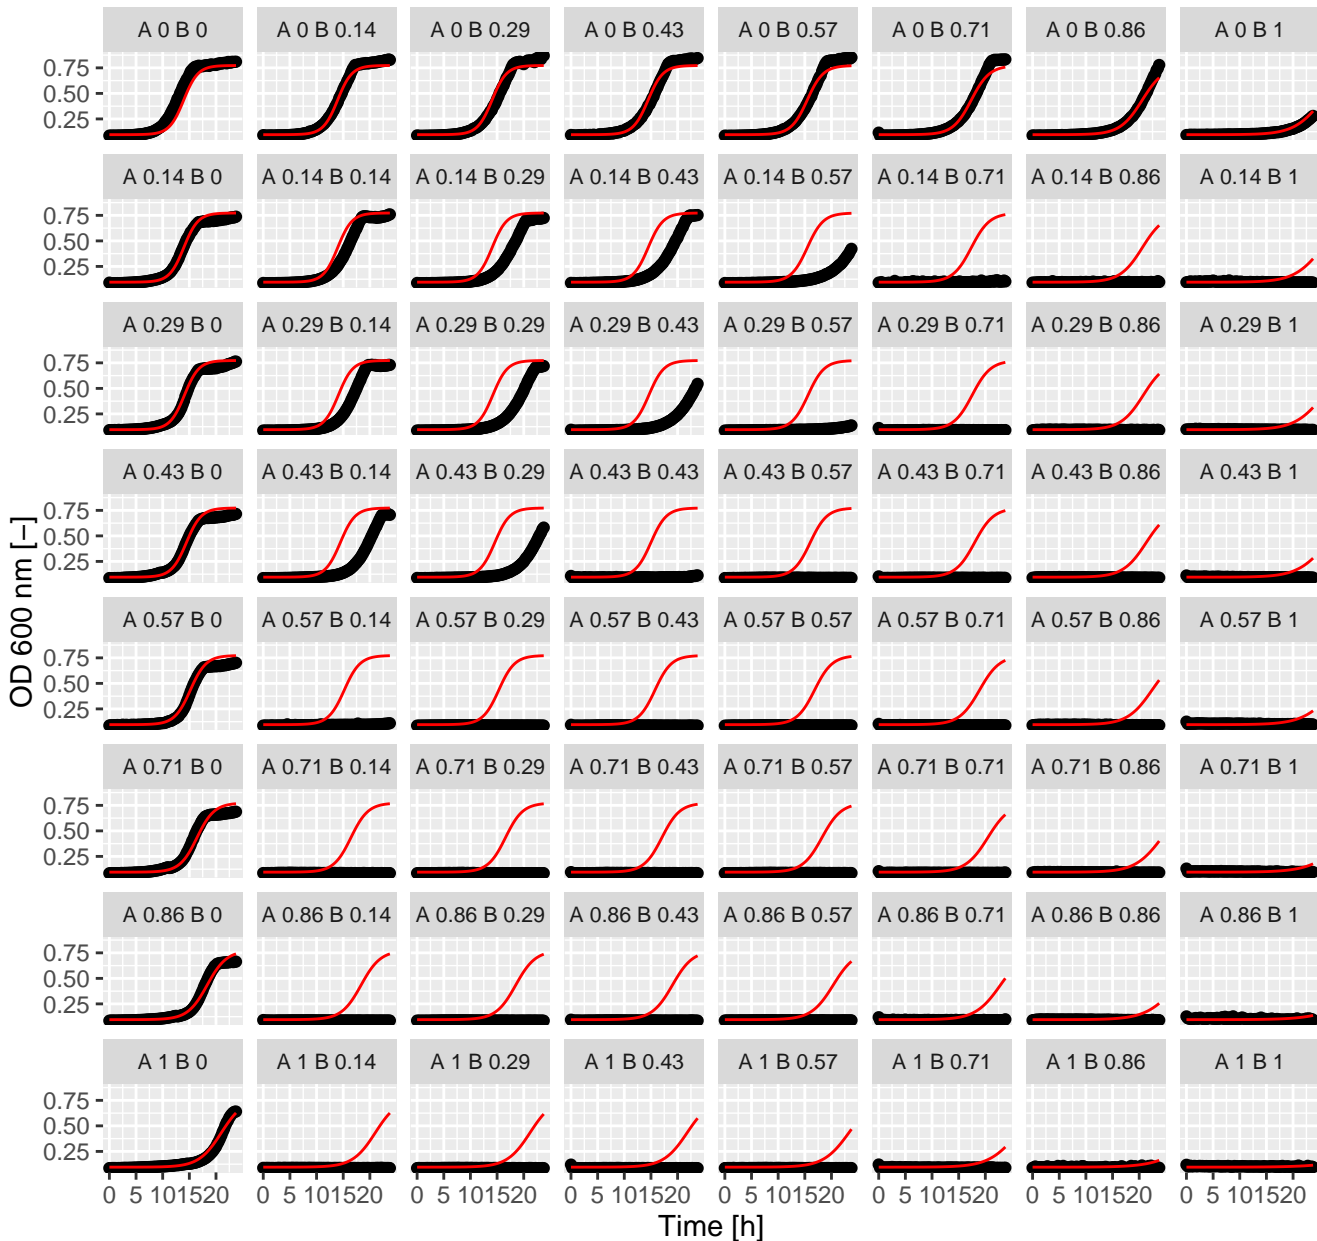

Hal.Tac (= Ax.Bx) full GPDI  
 Int\_AB = -0.6 and Int\_BA = -0.52 at EC50

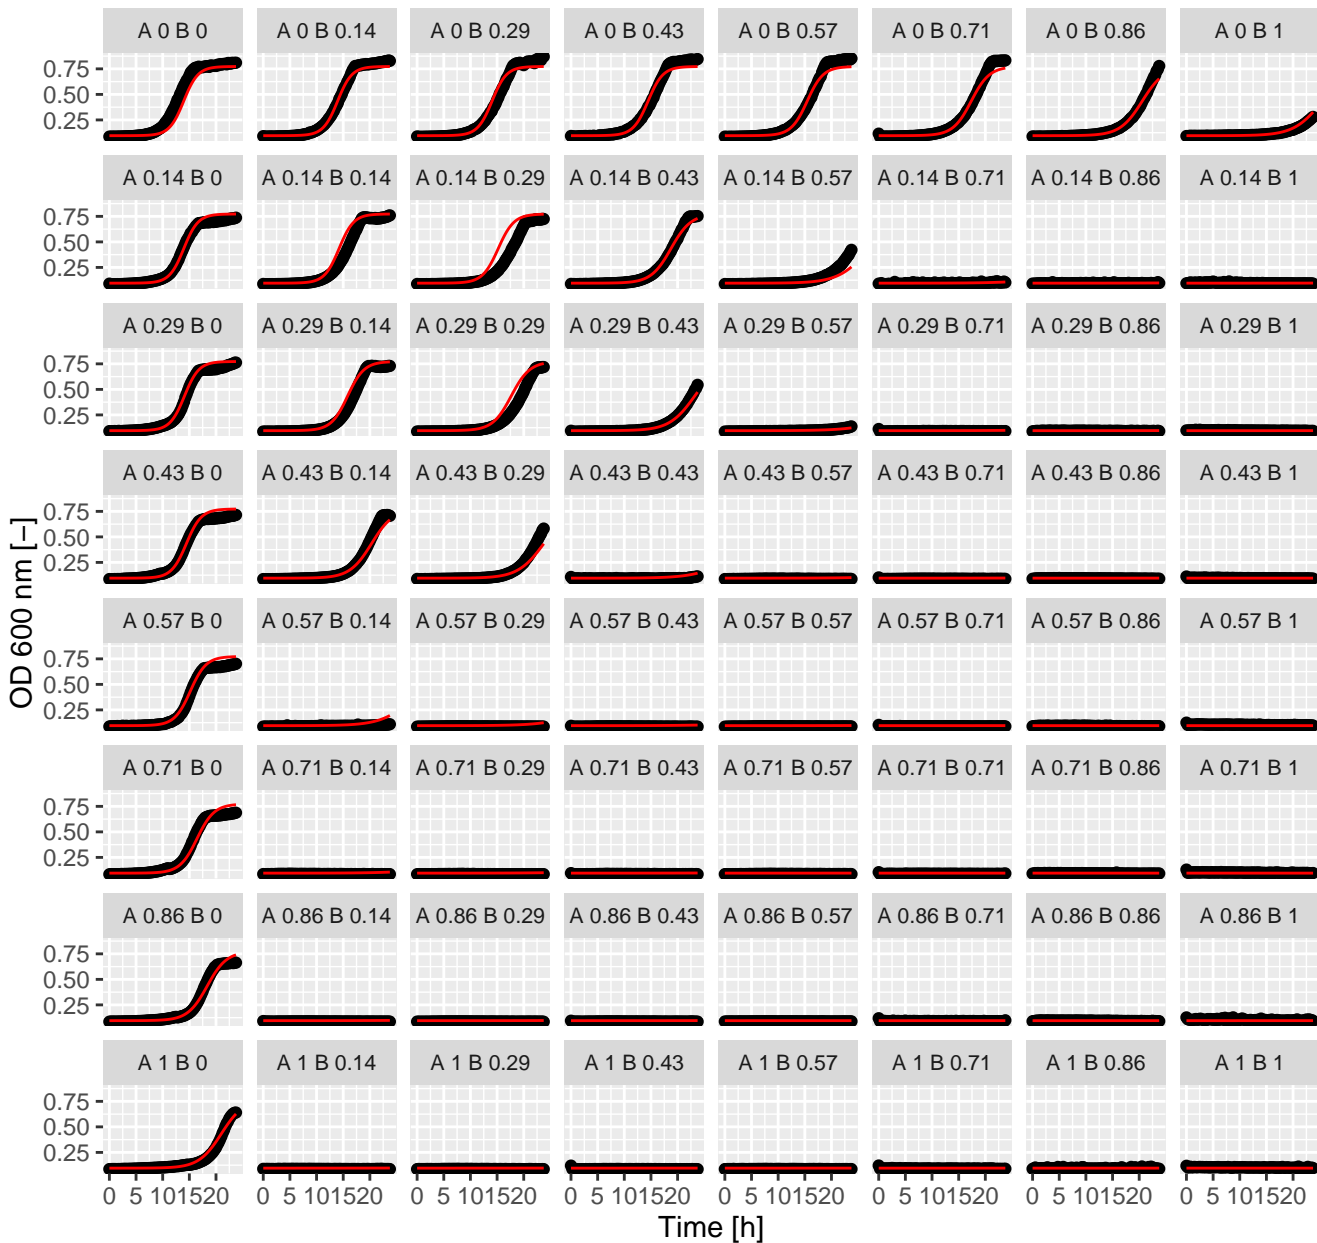

Hal.Sta (= Ax.Bx) exp. additivity (BI)  
Int\_AB = 0 and Int\_BA = 0 at EC50

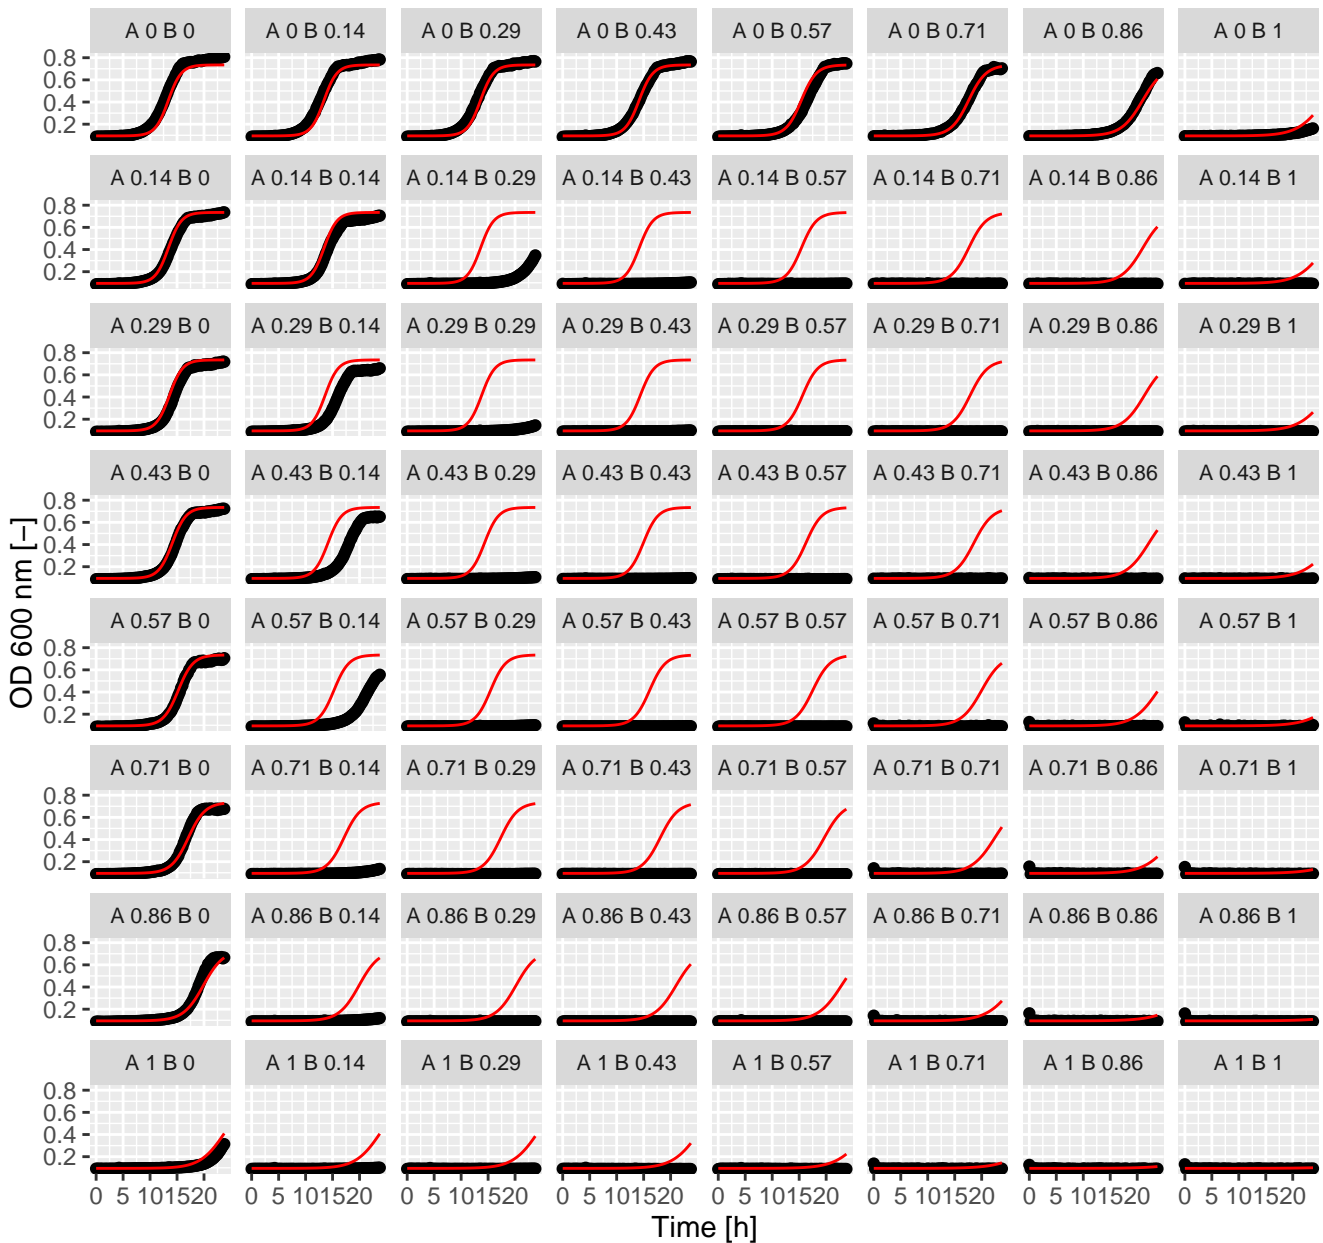

Hal.Sta (= Ax.Bx) full GPDI  
Int\_AB = -0.27 and Int\_BA = -0.79 at EC50

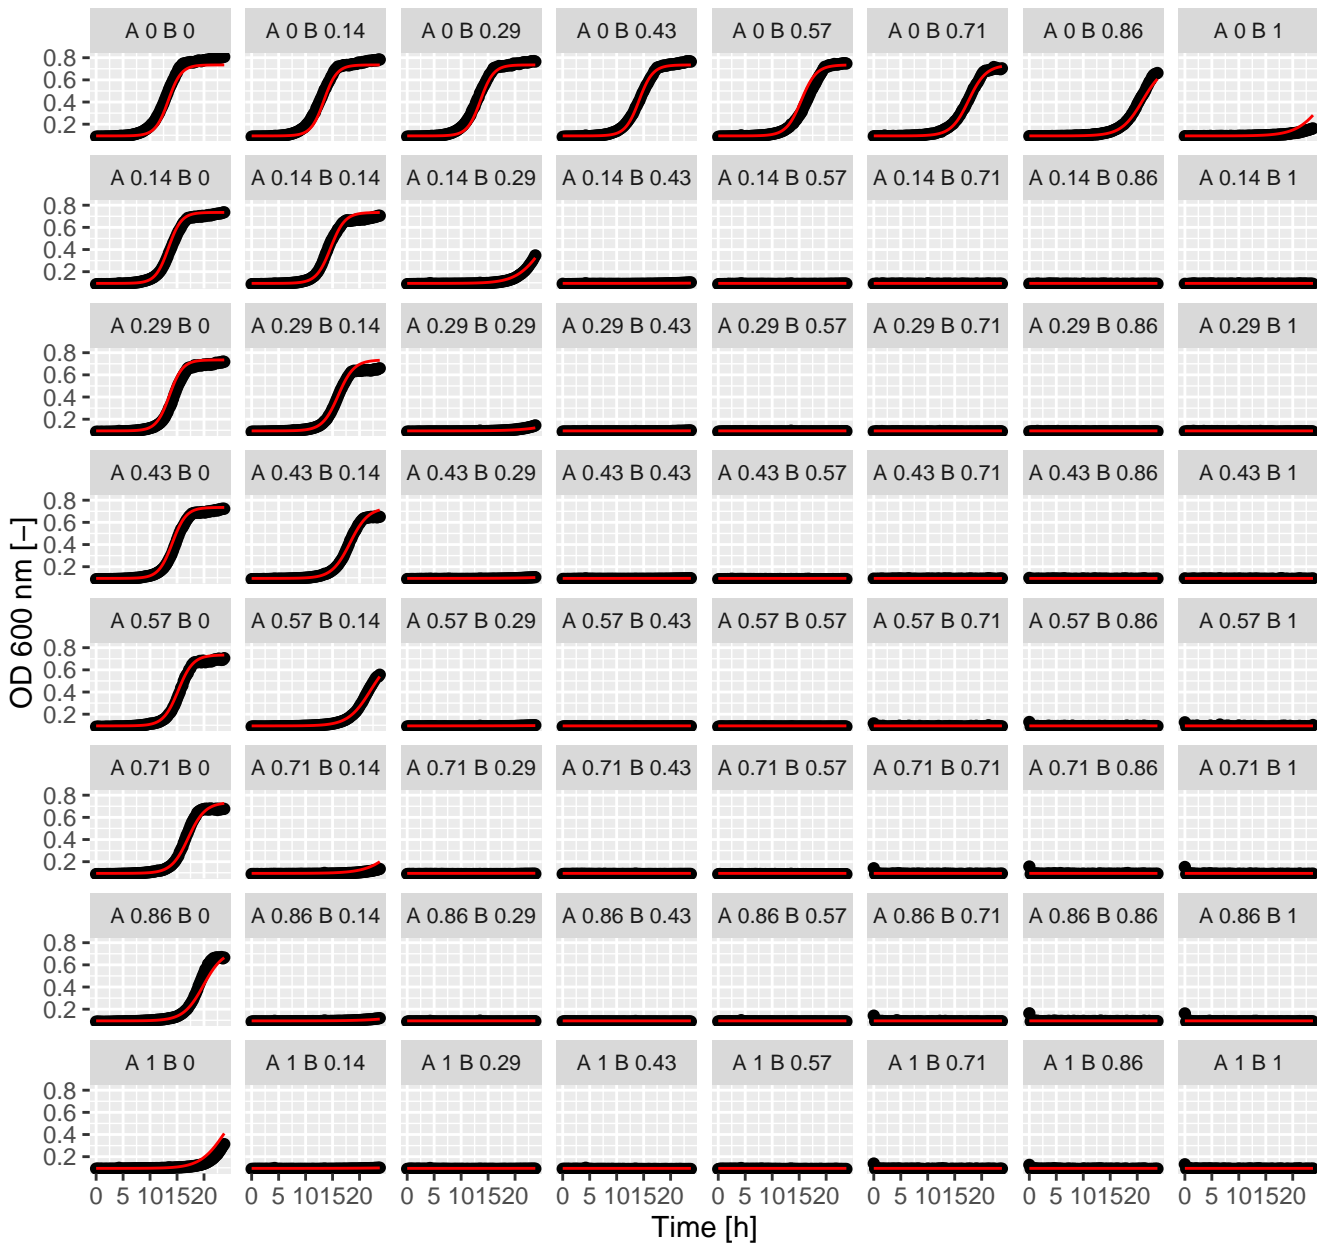



Hal.Rap (= Ax.Bx) exp. additivity (BI)  
 Int\_AB = 0 and Int\_BA = 0 at EC50

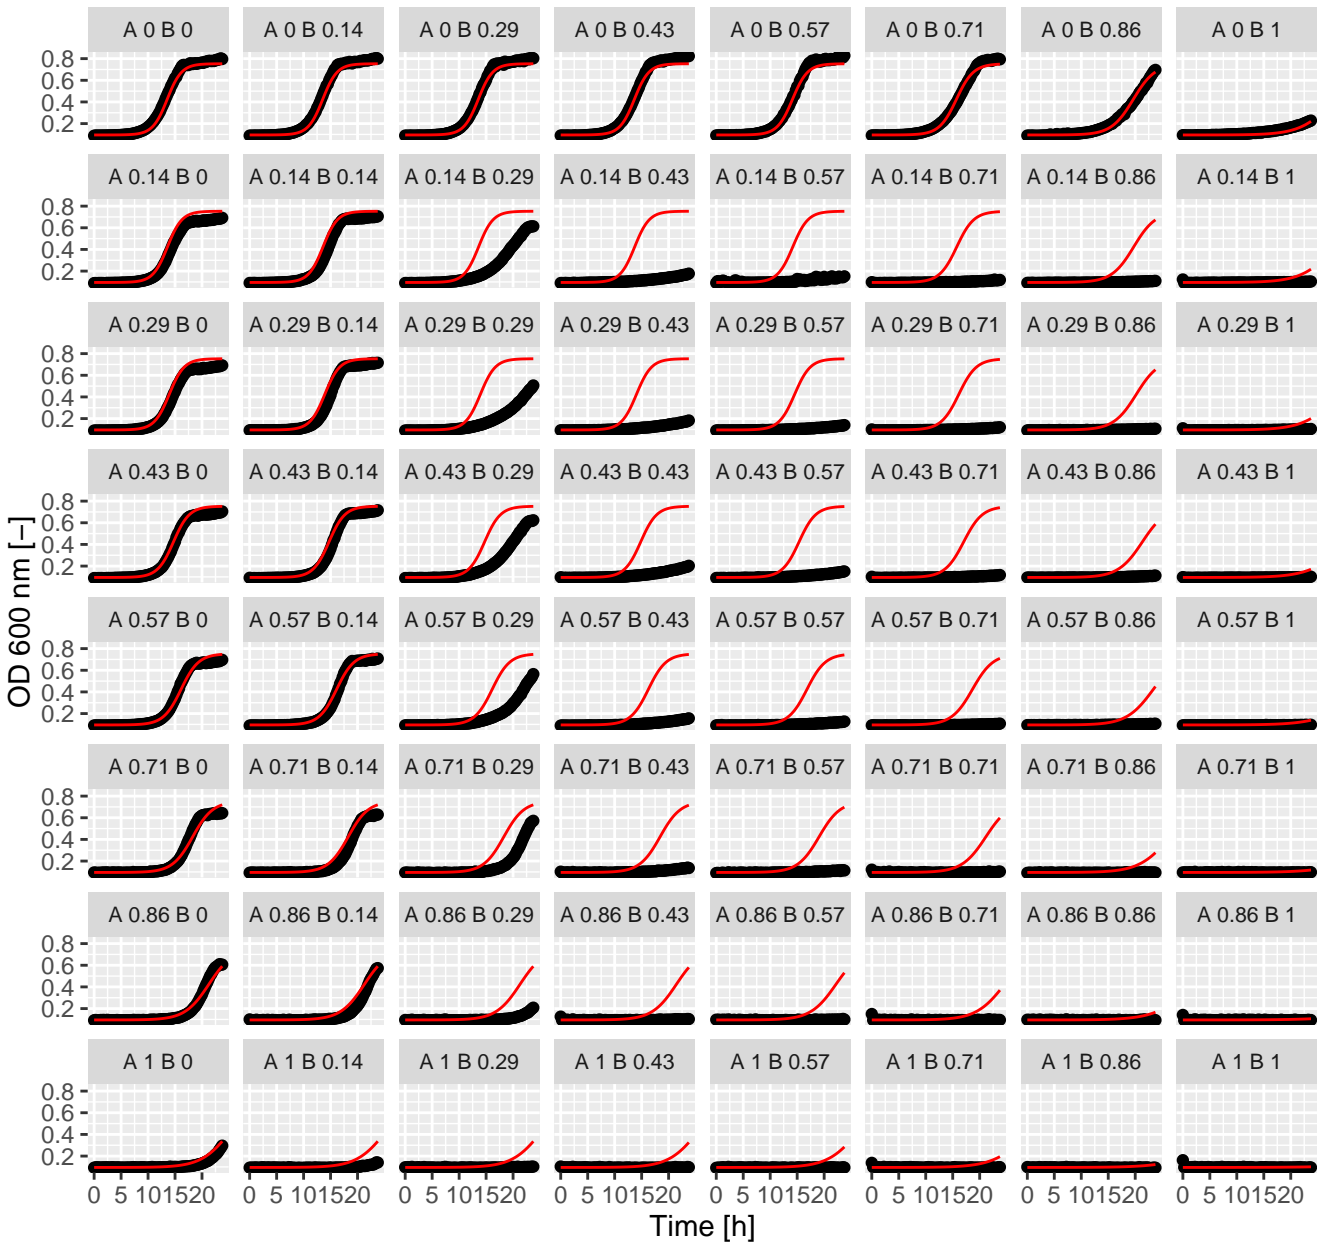

Hal.Rap (= Ax.Bx) full GPDI  
Int\_AB = -0.03 and Int\_BA = -0.66 at EC50

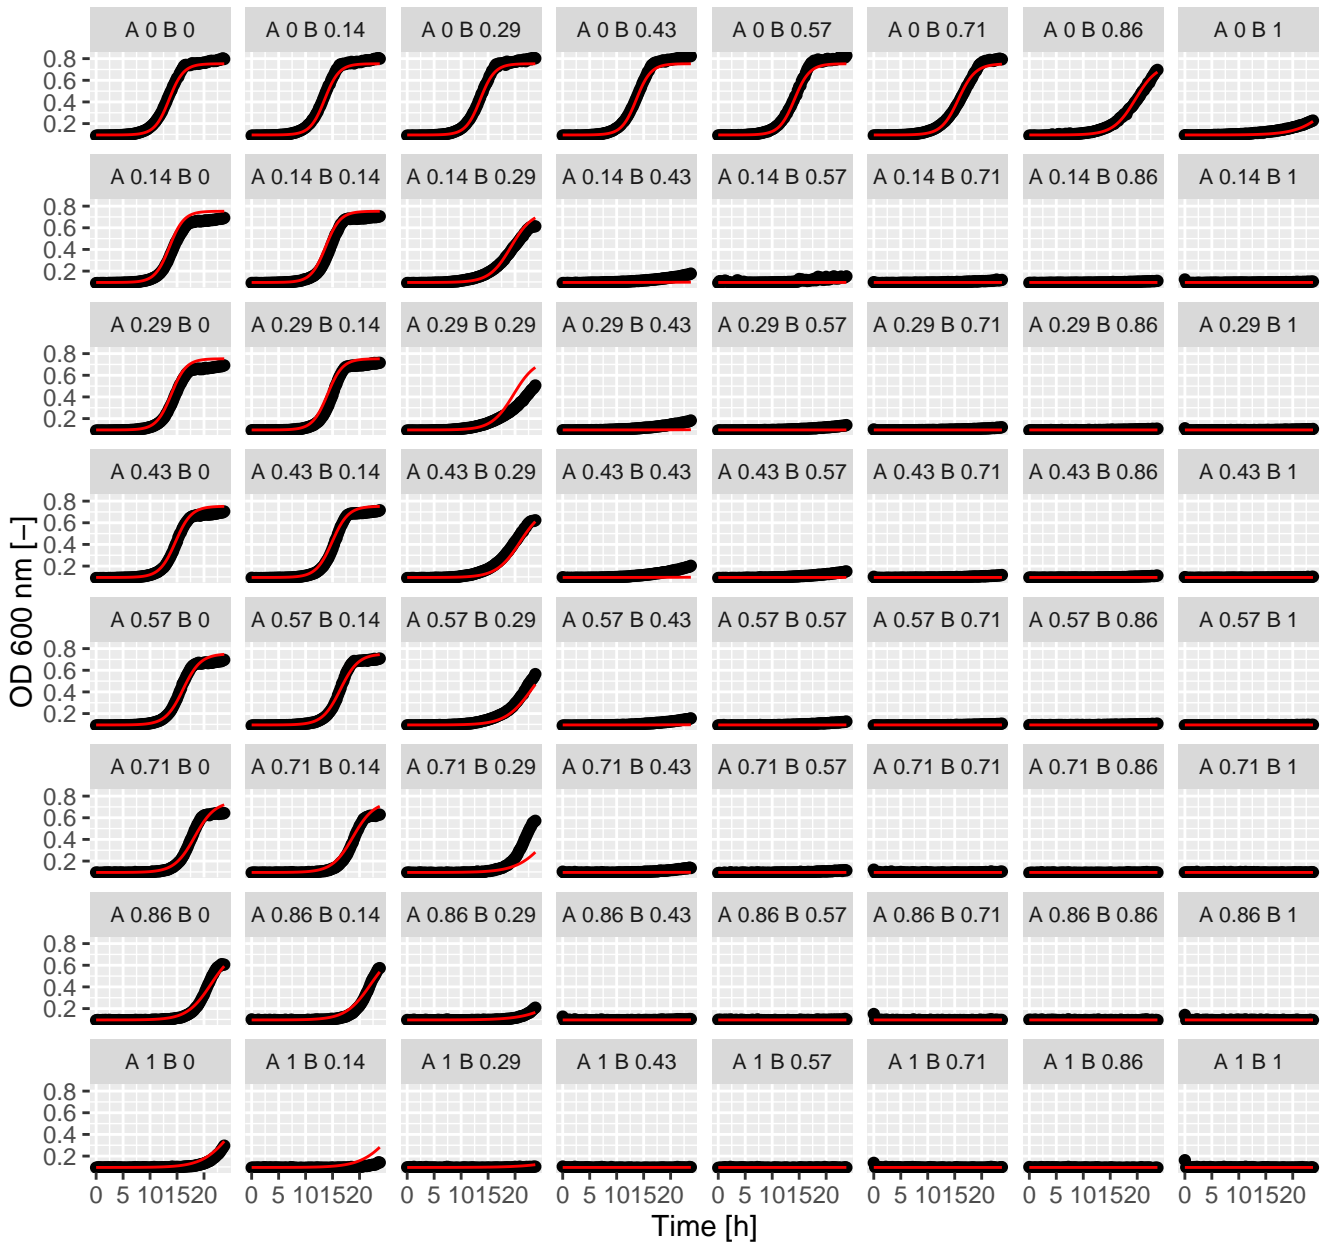

Hal.Pen (= Ax.Bx) exp. additivity (BI)  
Int\_AB = 0 and Int\_BA = 0 at EC50

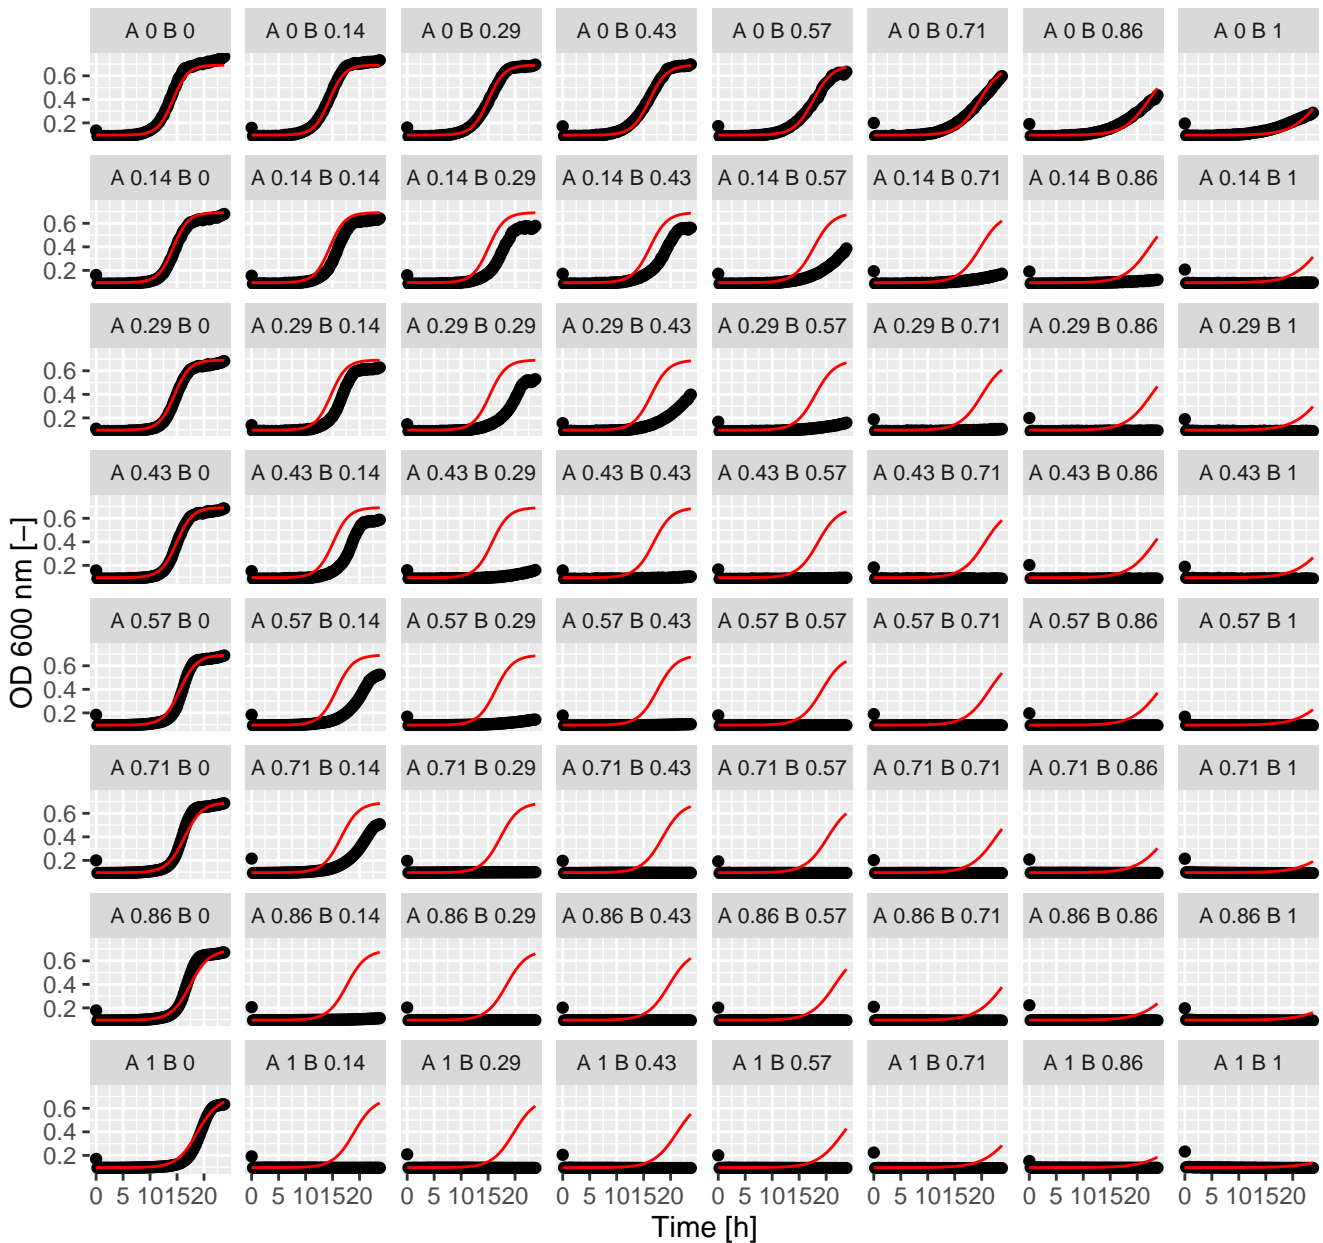

Hal.Pen (= Ax.Bx) full GPDI  
Int\_AB = -0.68 and Int\_BA = -0.76 at EC50

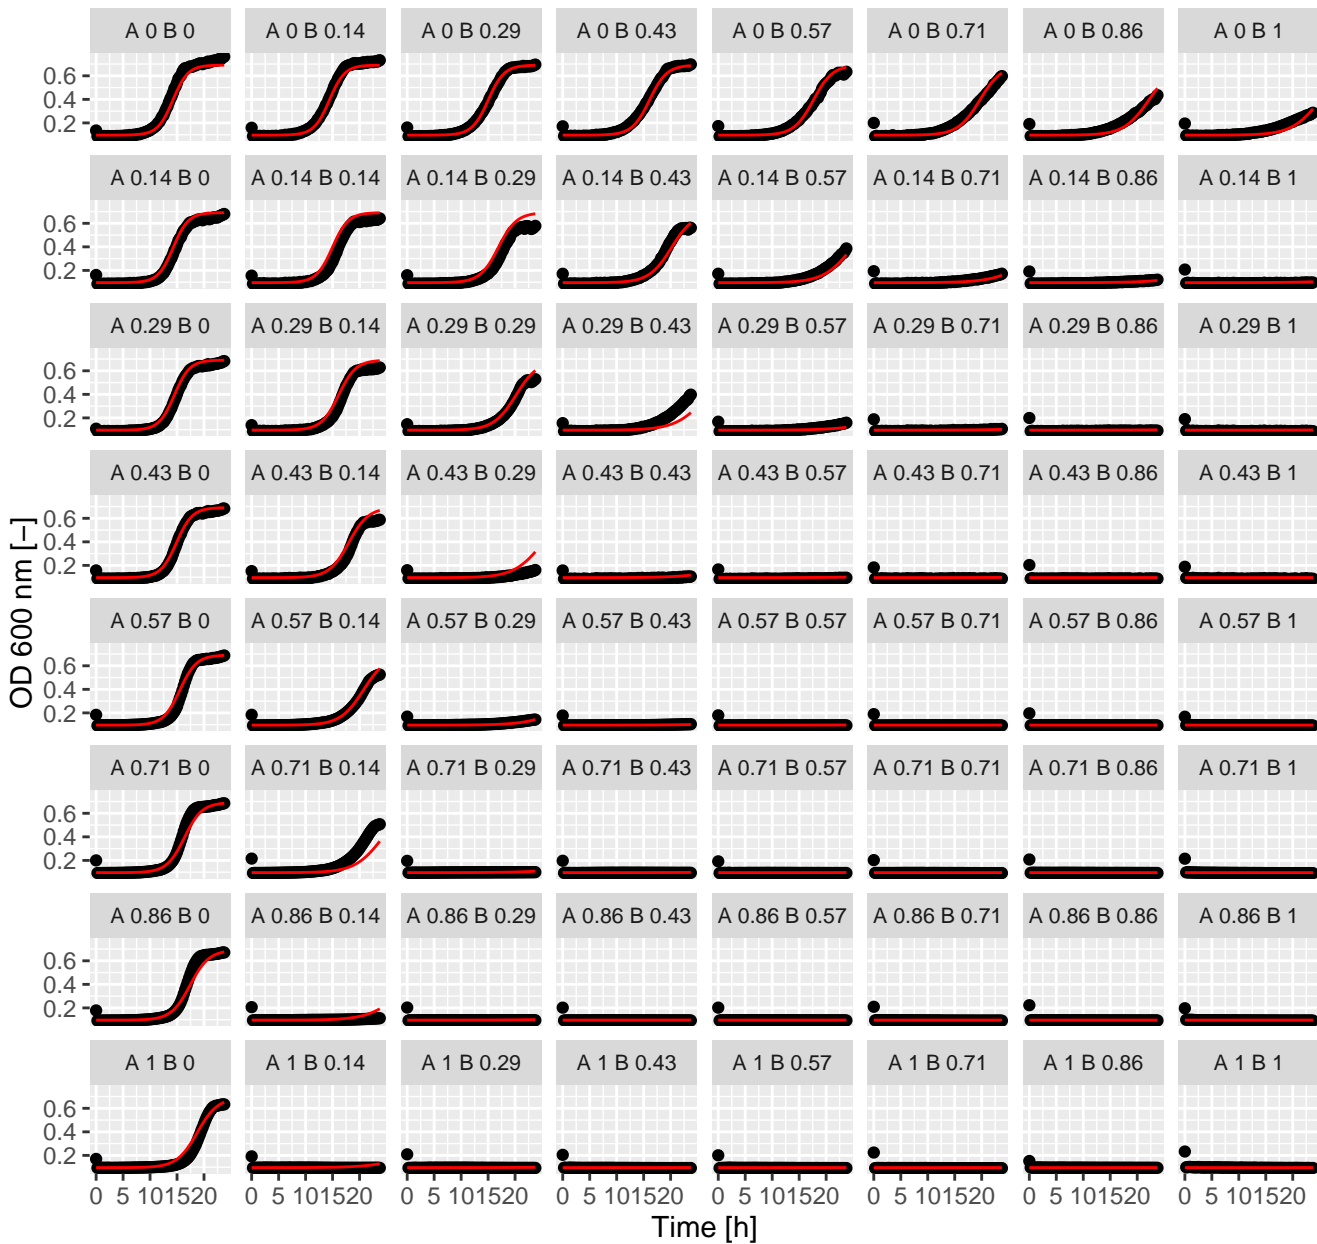

Hal.Lat (= Ax.Bx) exp. additivity (BI)  
Int\_AB = 0 and Int\_BA = 0 at EC50

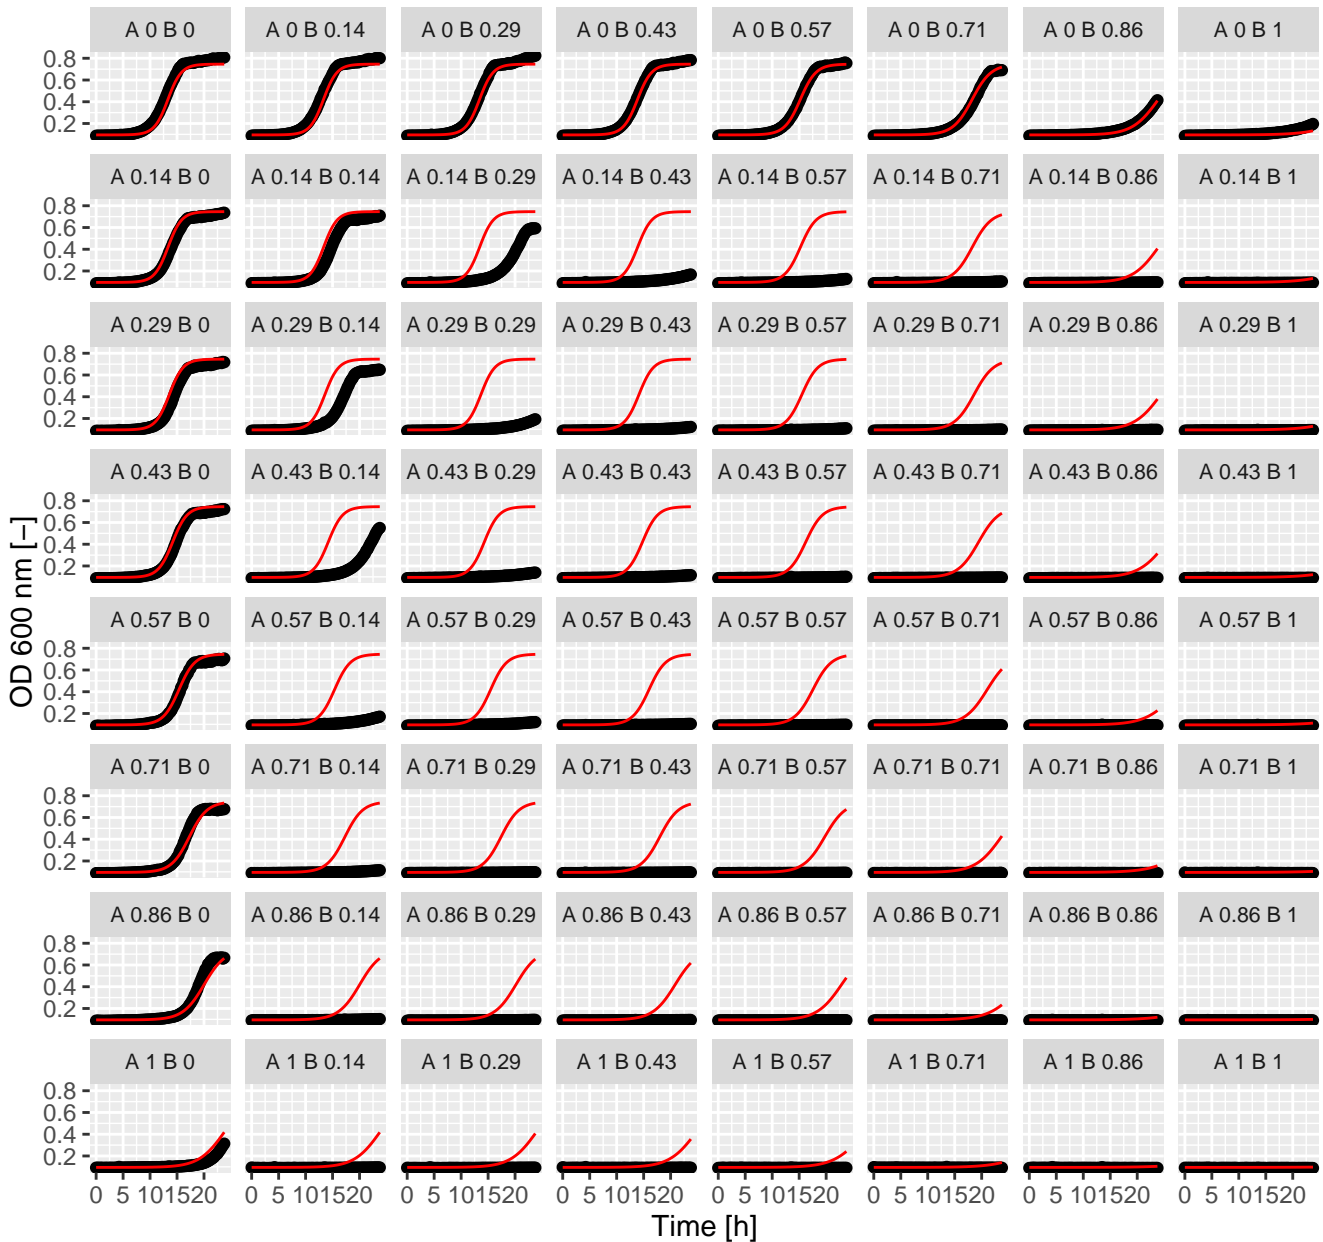

Hal.Lat (= Ax.Bx) full GPDI  
Int\_AB = -0.54 and Int\_BA = -0.7 at EC50

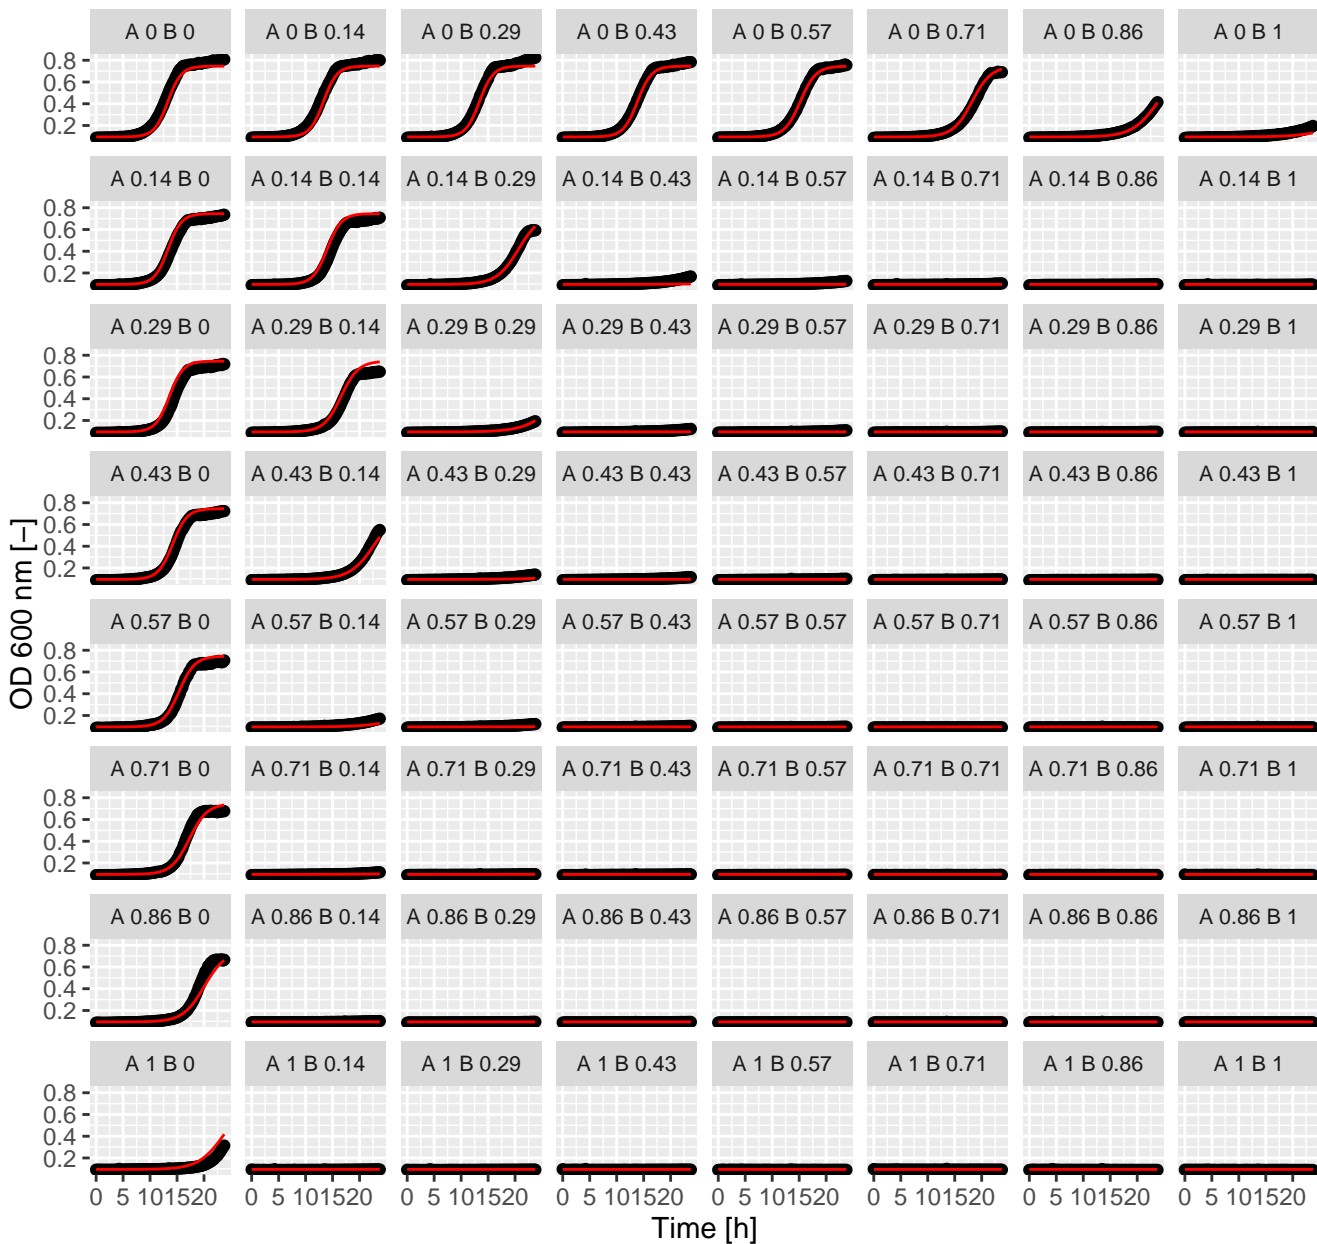

Hal.Hal (= Ax.Bx) exp. additivity (BI)  
Int\_AB = 0 and Int\_BA = 0 at EC50

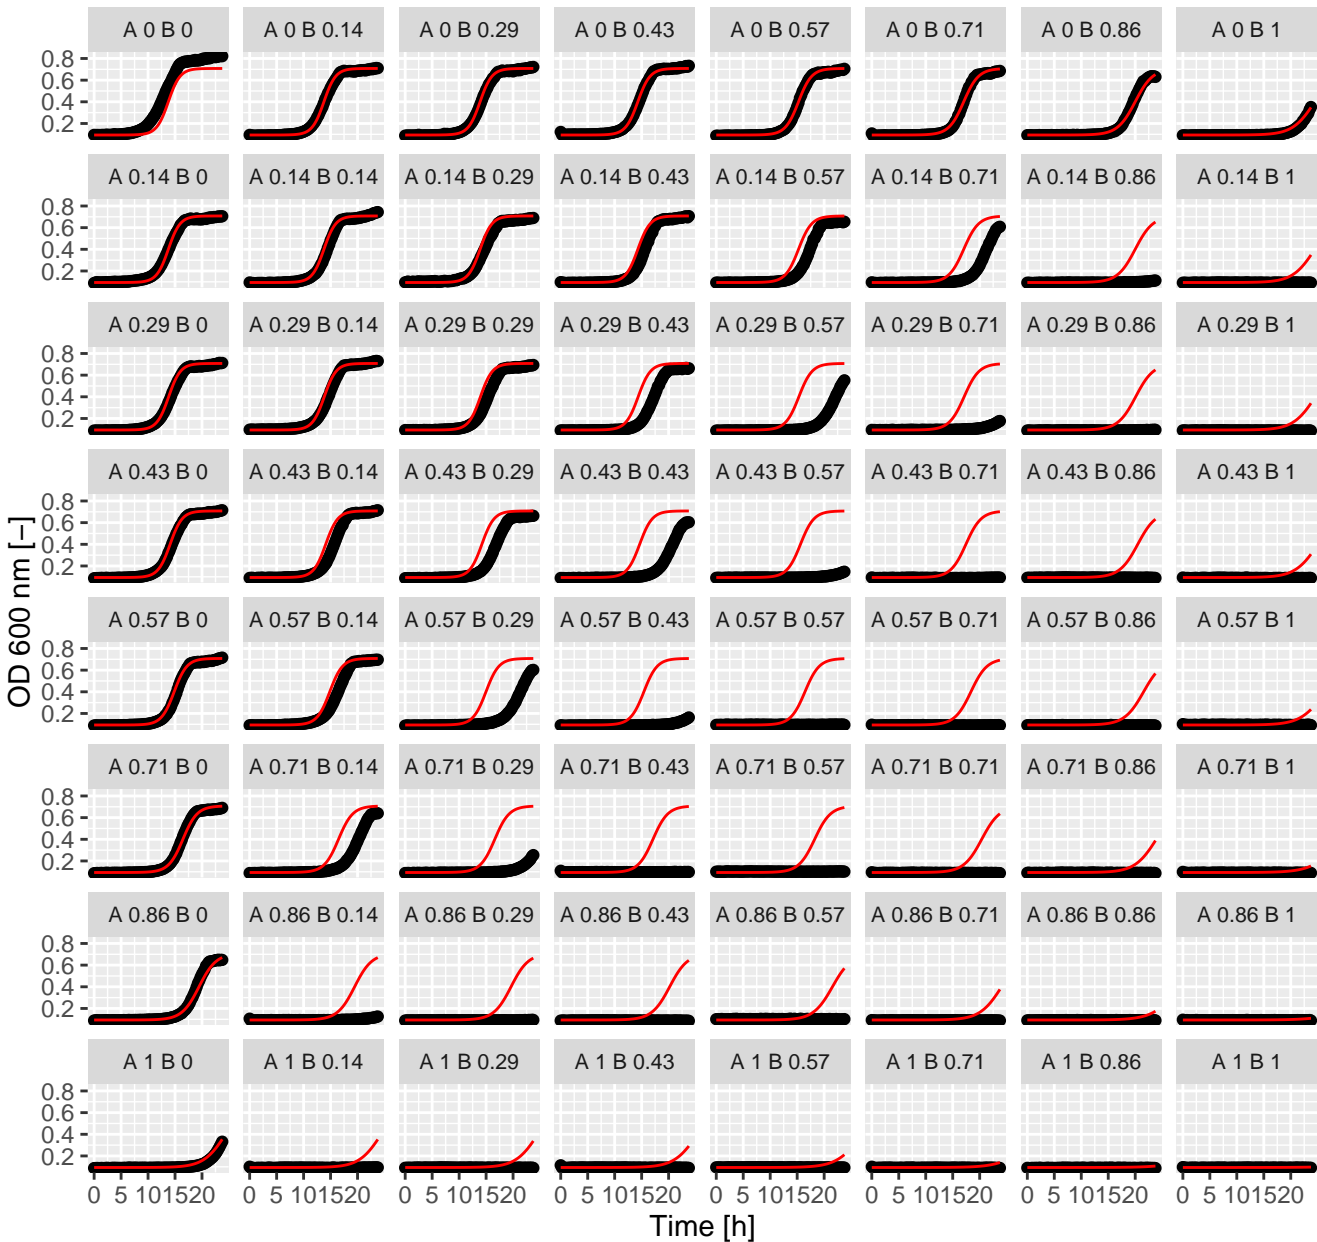

Hal.Hal (= Ax.Bx) full GPDI  
Int\_AB = -0.52 and Int\_BA = -0.64 at EC50

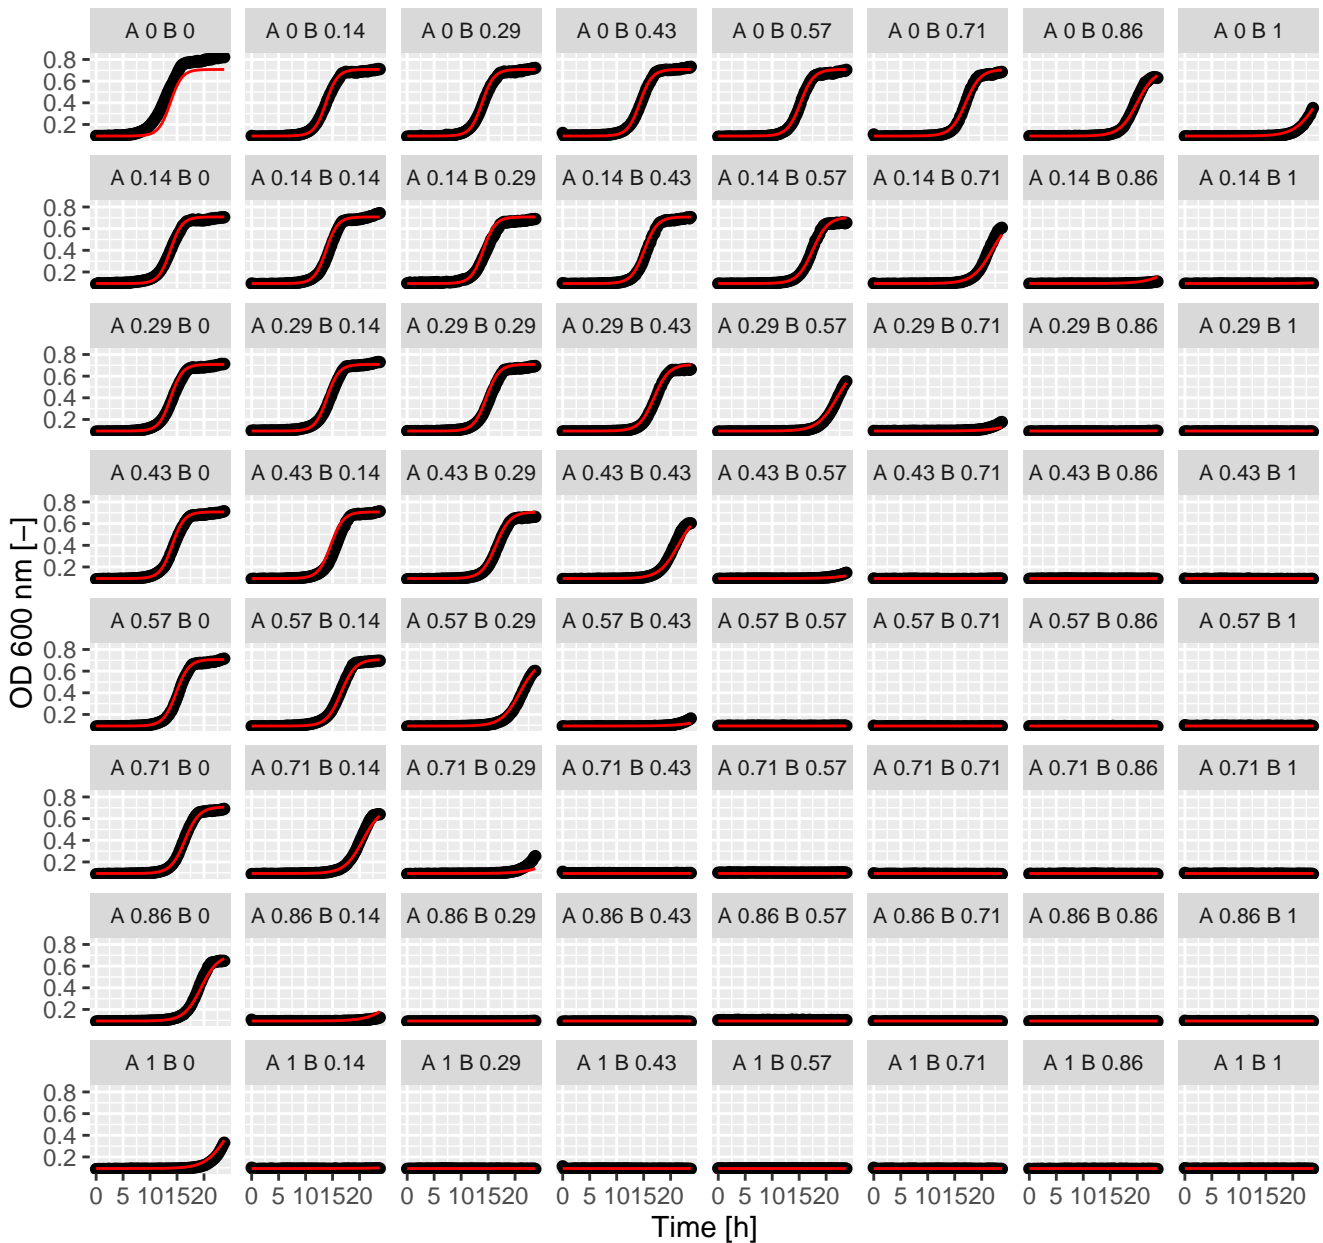



Fen.Tun (= Ax.Bx) exp. additivity (BI)  
Int\_AB = 0 and Int\_BA = 0 at EC50

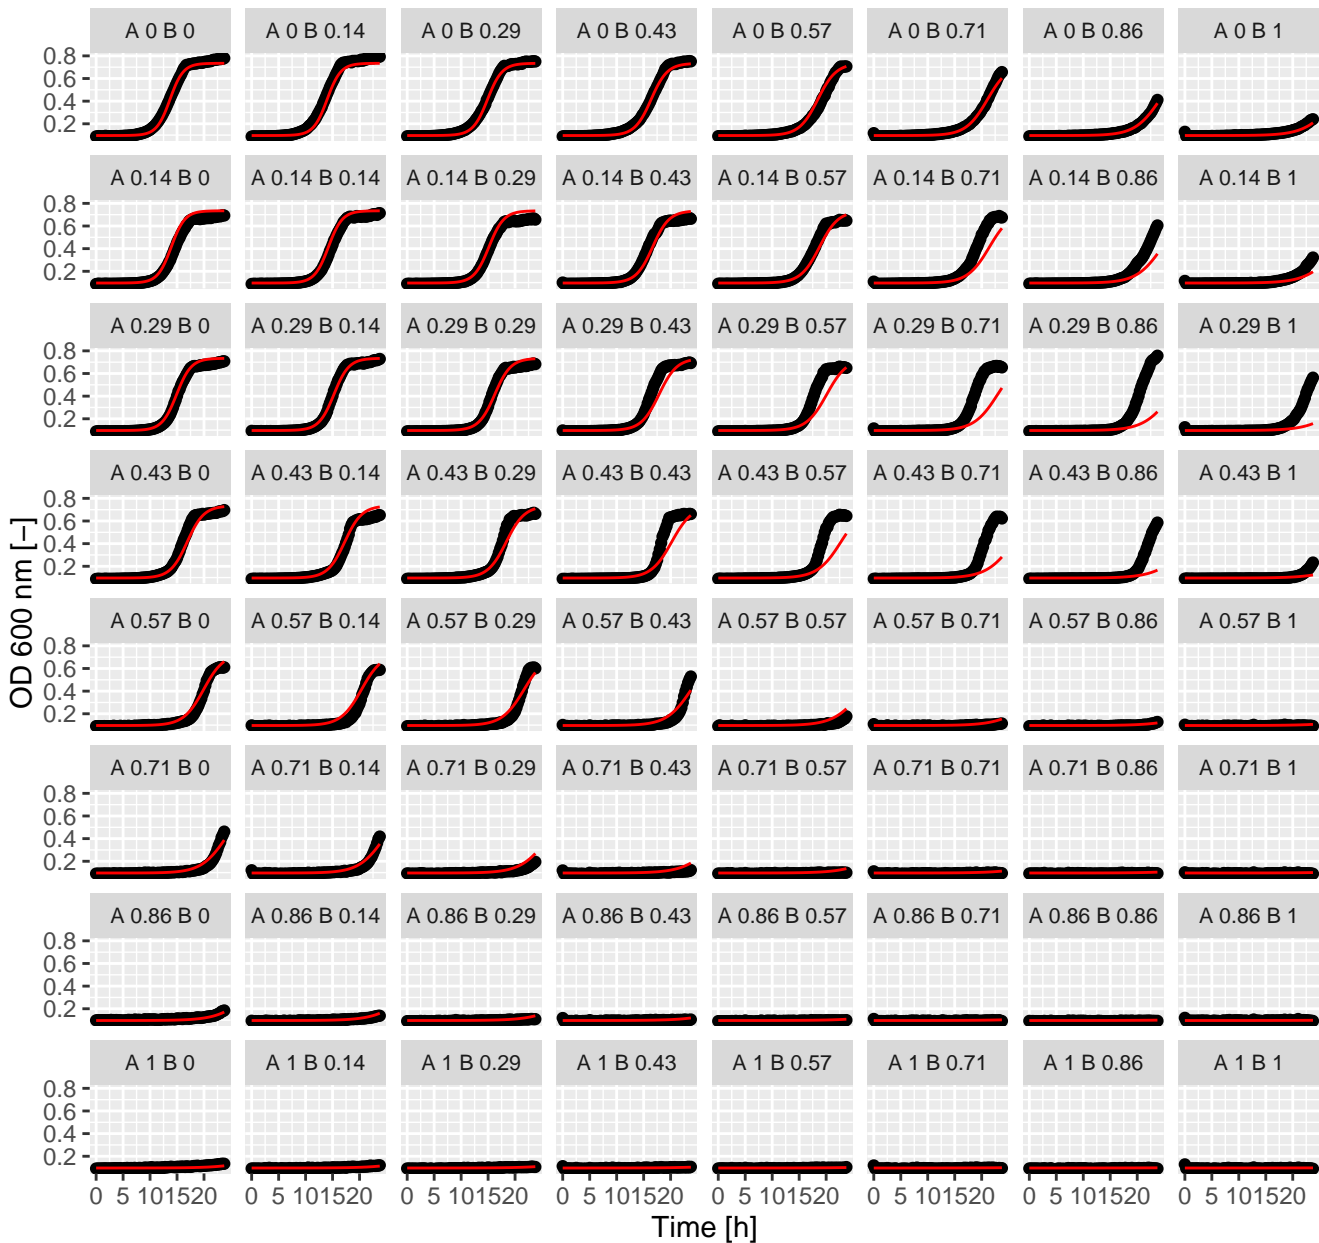

Fen.Tun (= Ax.Bx) full GPDI  
Int\_AB = -0.18 and Int\_BA = 1.33 at EC50

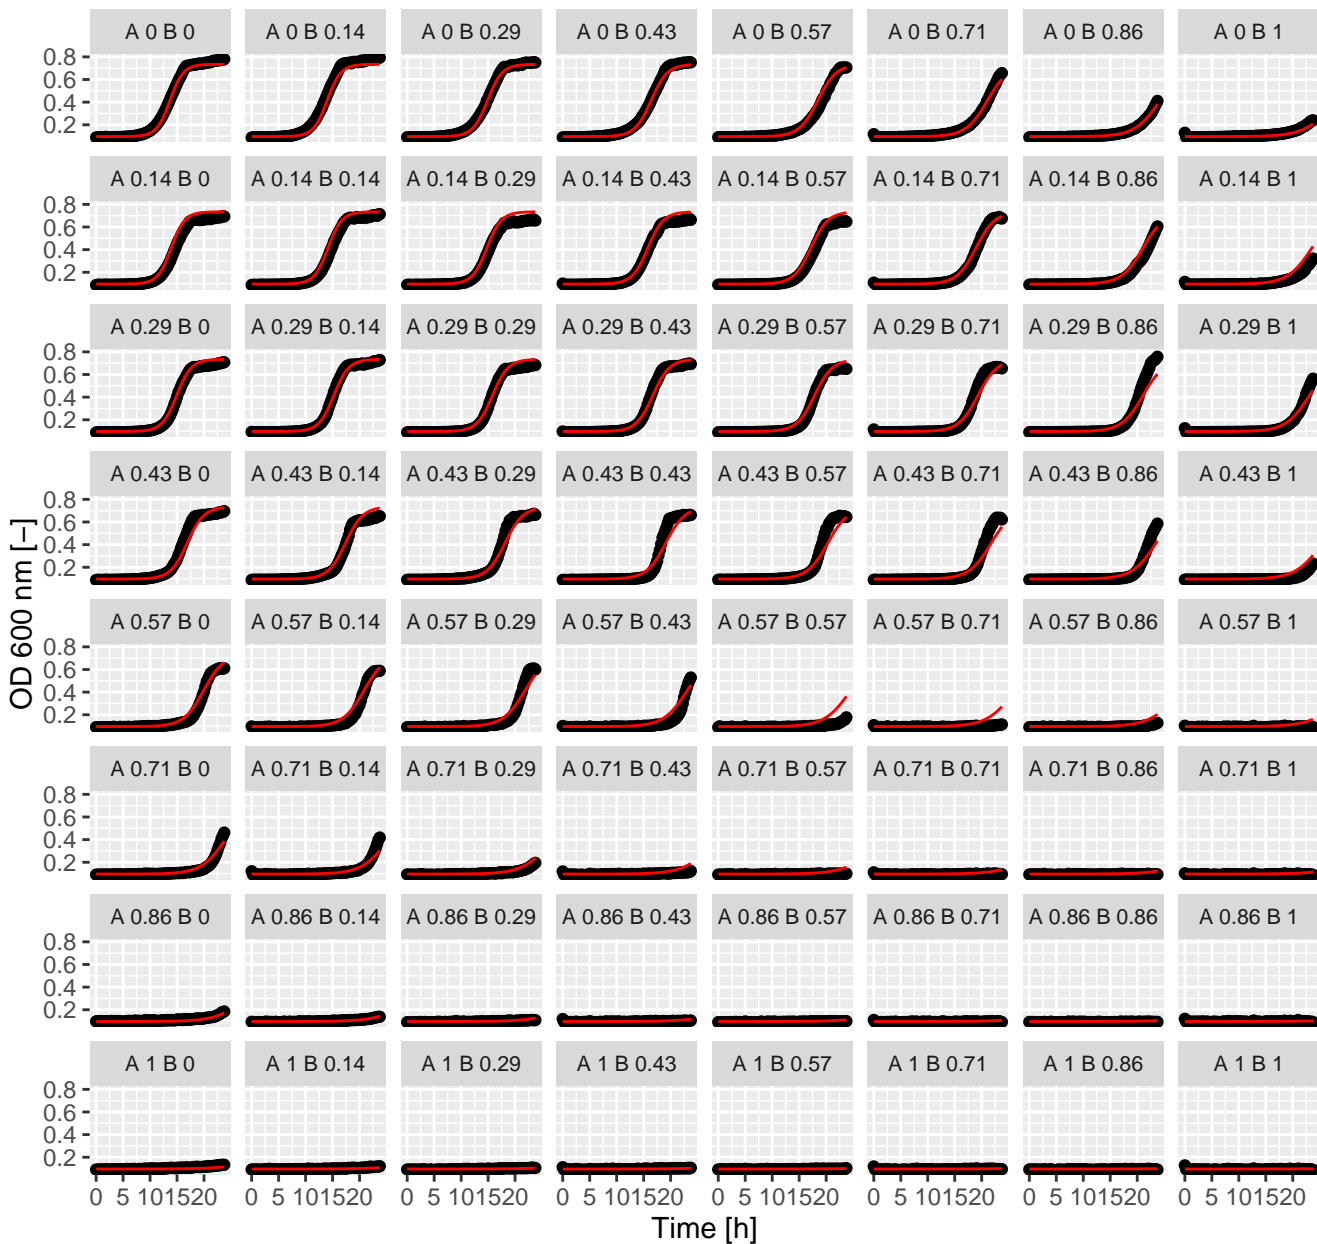

Fen.Ter (= Ax.Bx) exp. additivity (BI)  
Int\_AB = 0 and Int\_BA = 0 at EC50

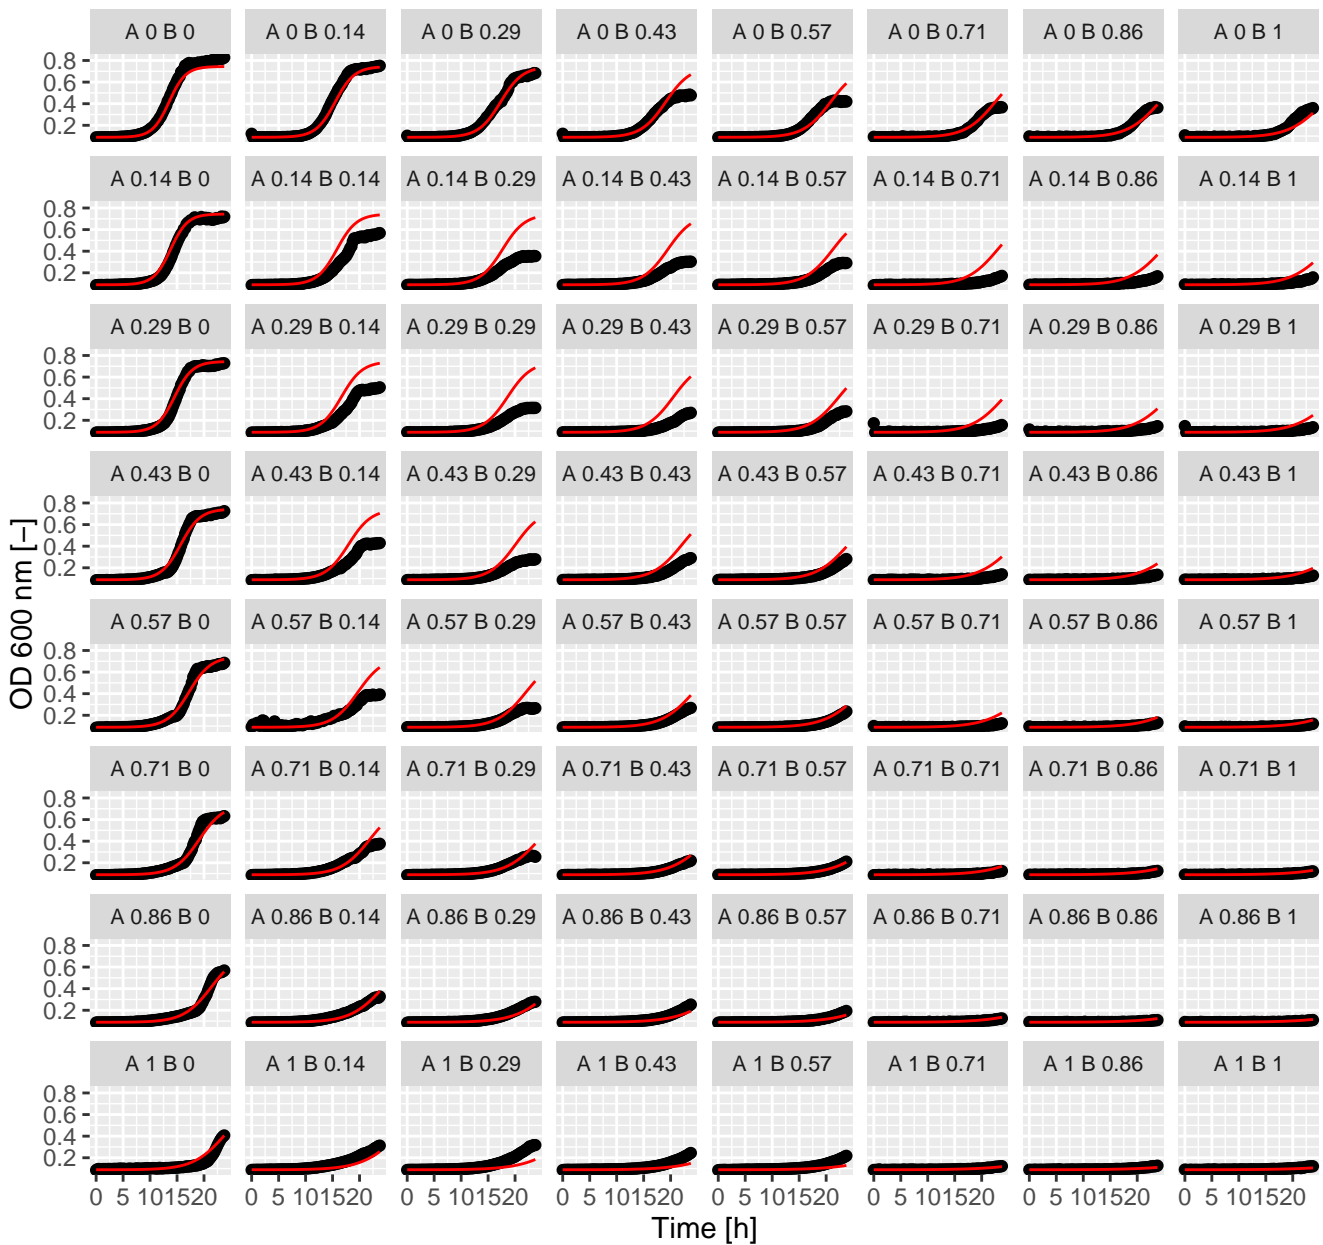

Fen.Ter (= Ax.Bx) full GPDI  
Int\_AB = 1.57 and Int\_BA = -0.63 at EC50

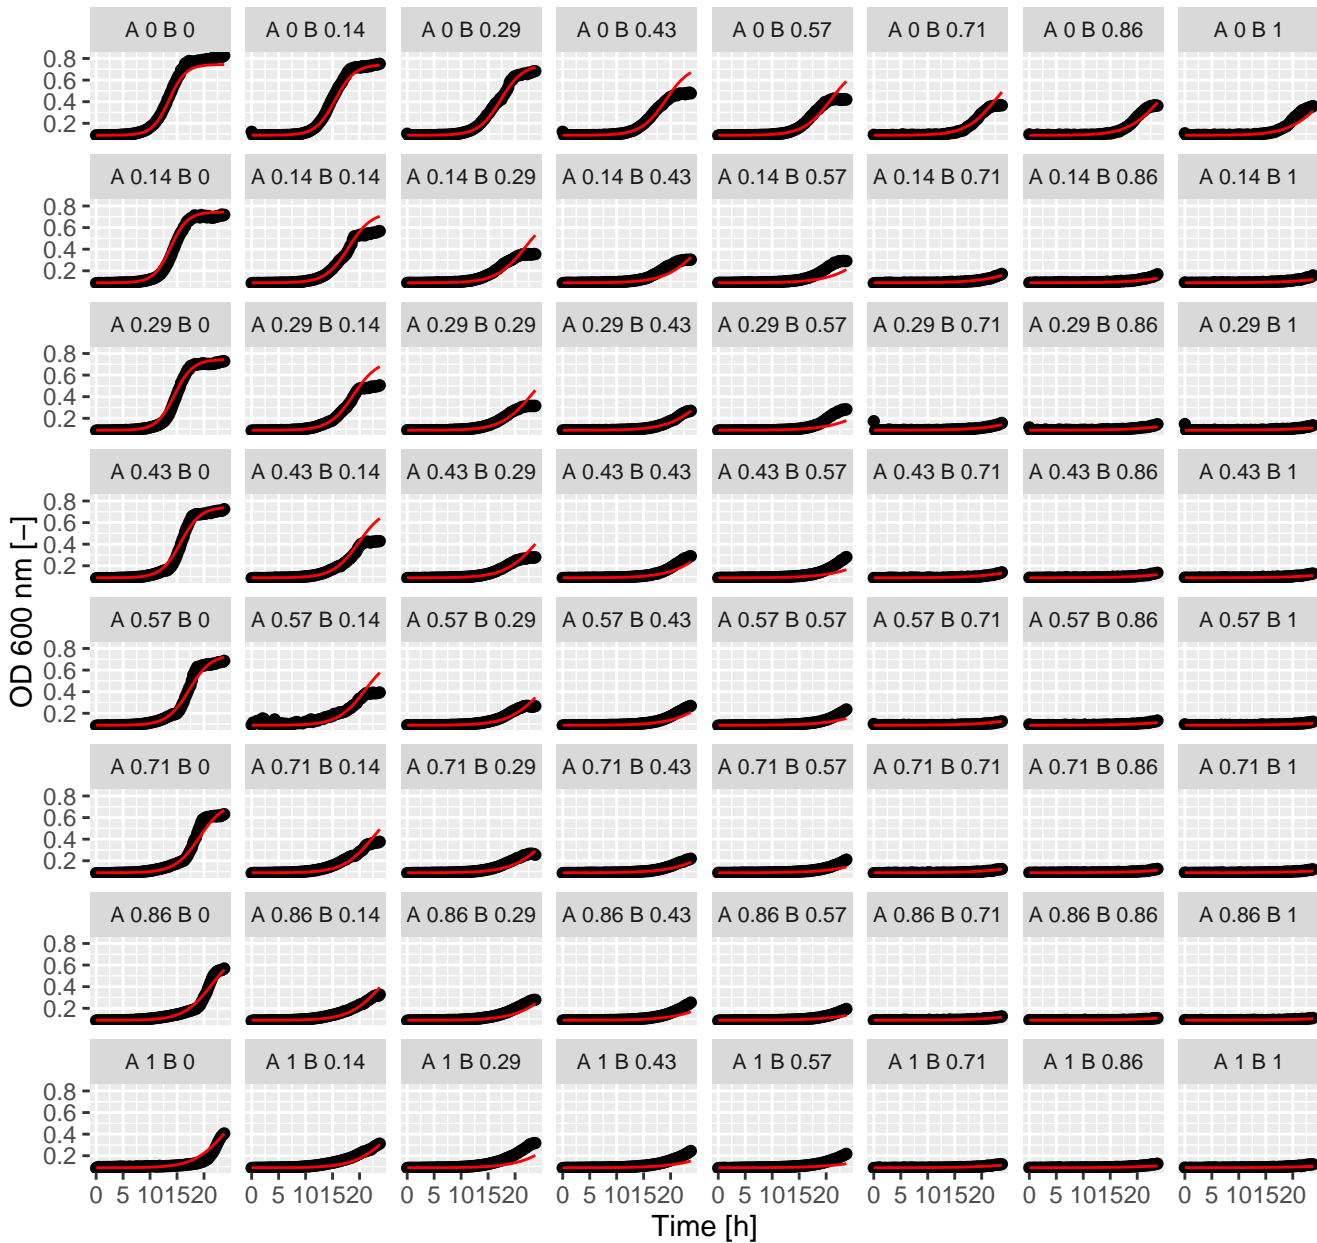

Fen.Tac (= Ax.Bx) exp. additivity (BI)  
 Int\_AB = 0 and Int\_BA = 0 at EC50

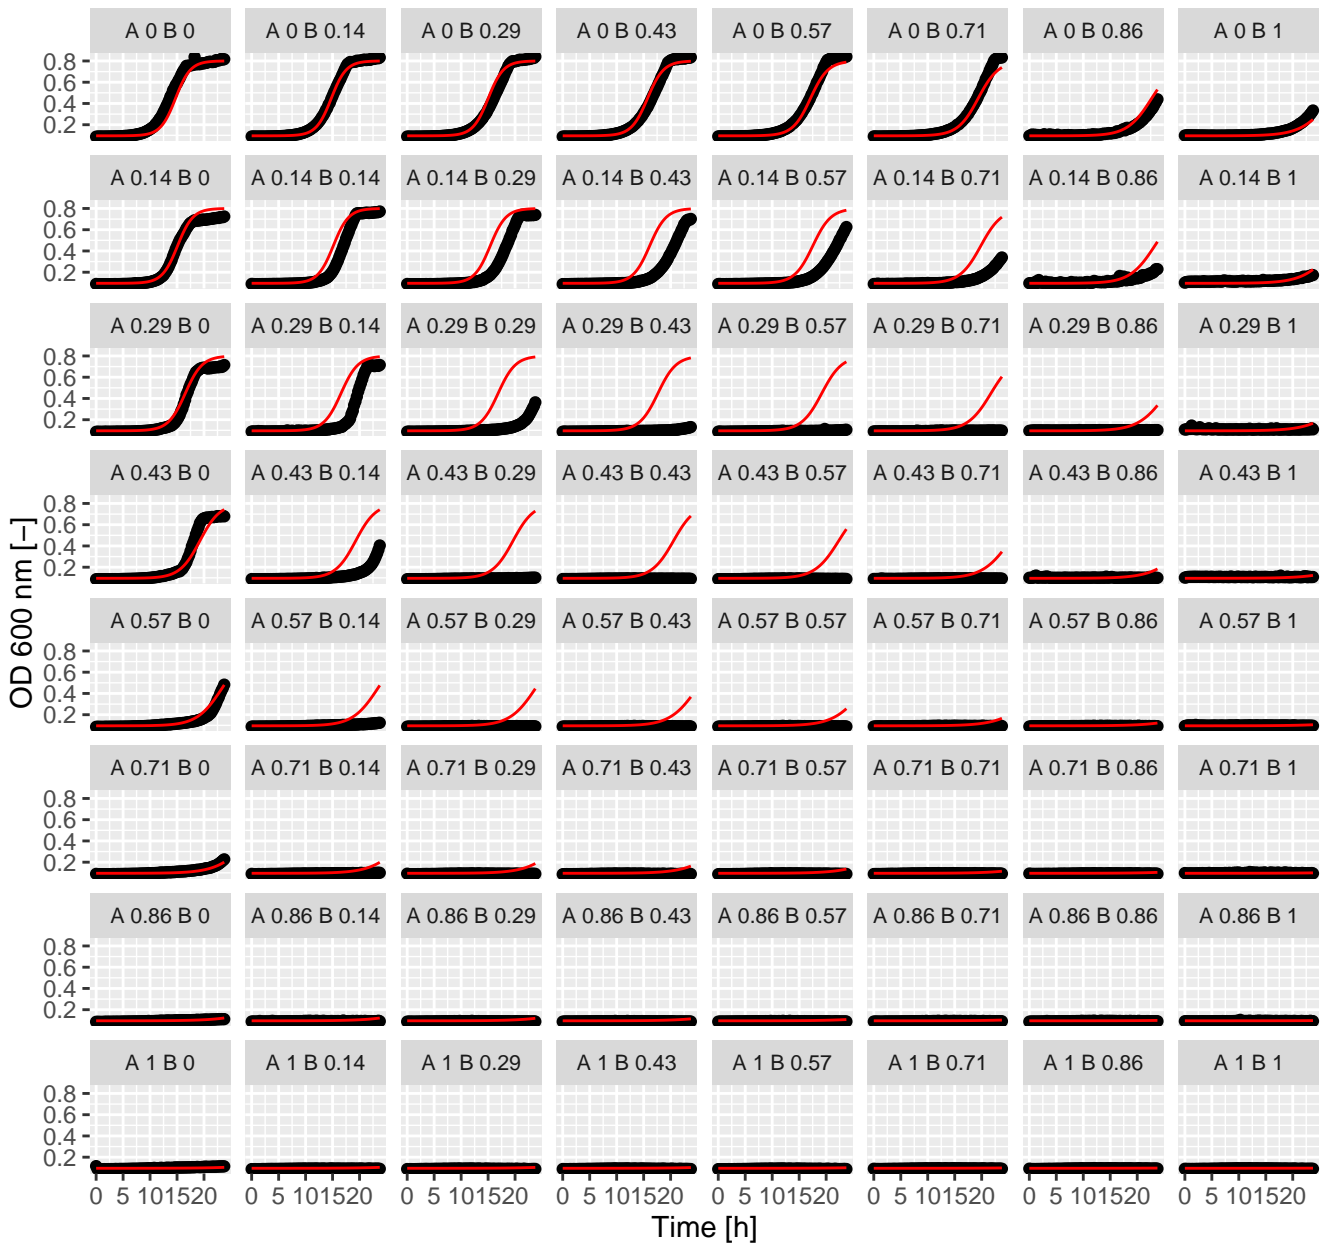

Fen.Tac (= Ax.Bx) full GPDI  
Int\_AB = -0.83 and Int\_BA = 175 at EC50

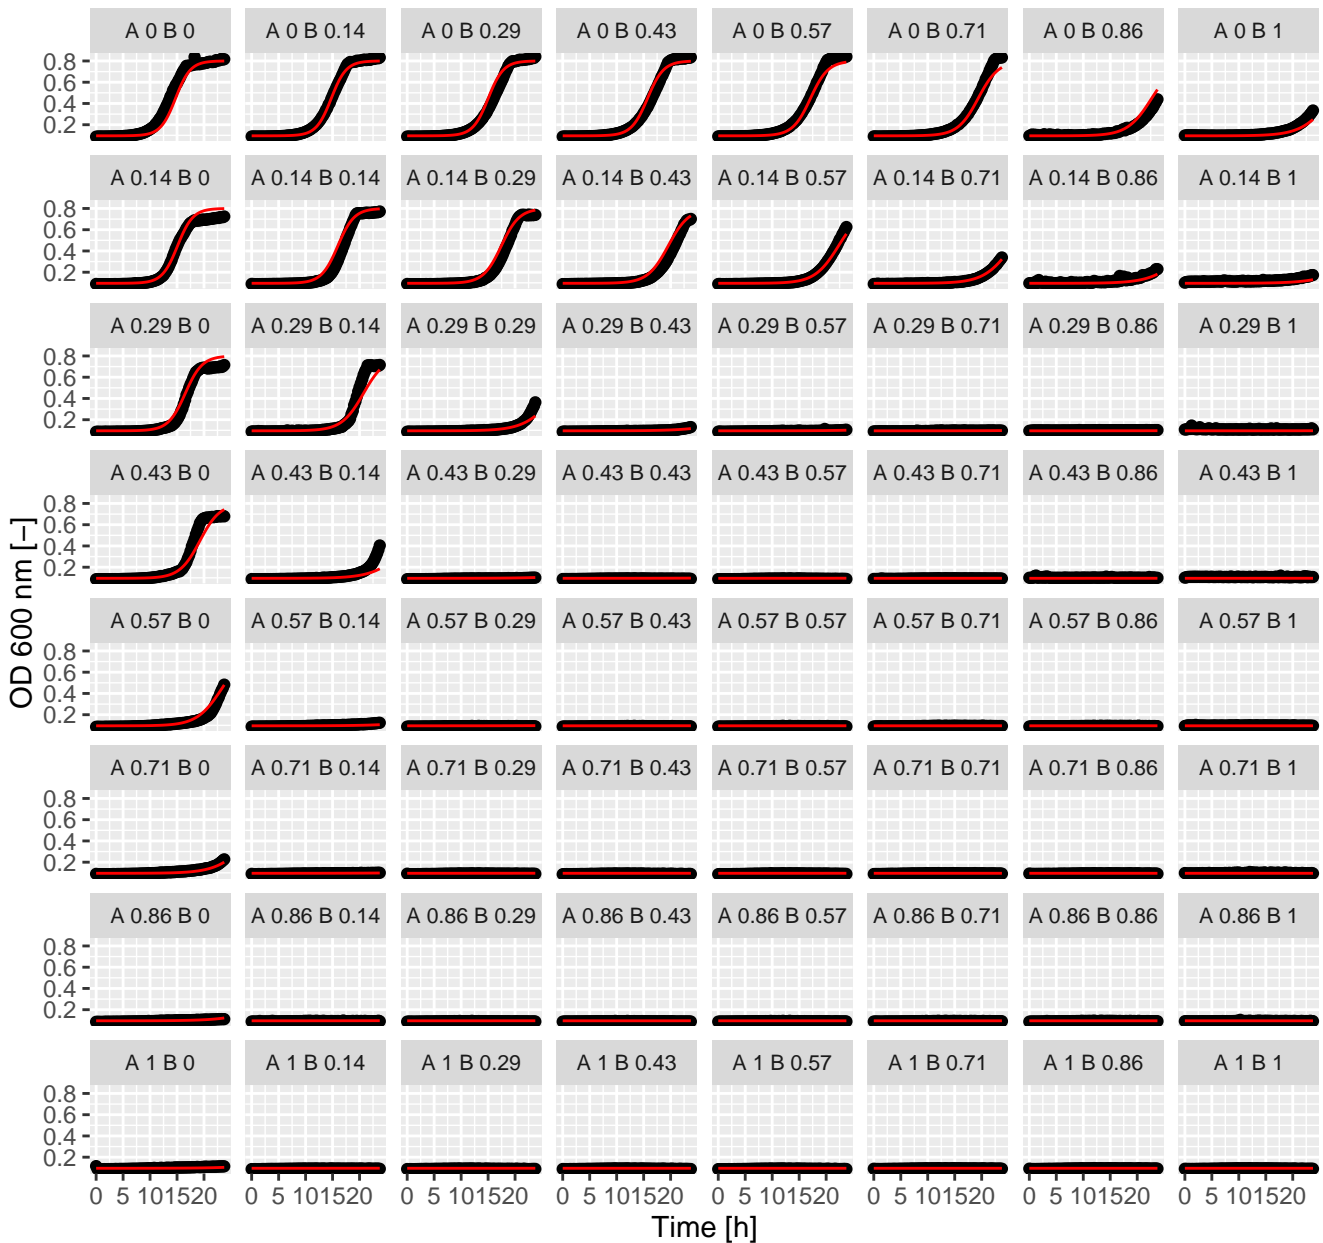

Fen.Sta (= Ax.Bx) exp. additivity (BI)  
Int\_AB = 0 and Int\_BA = 0 at EC50

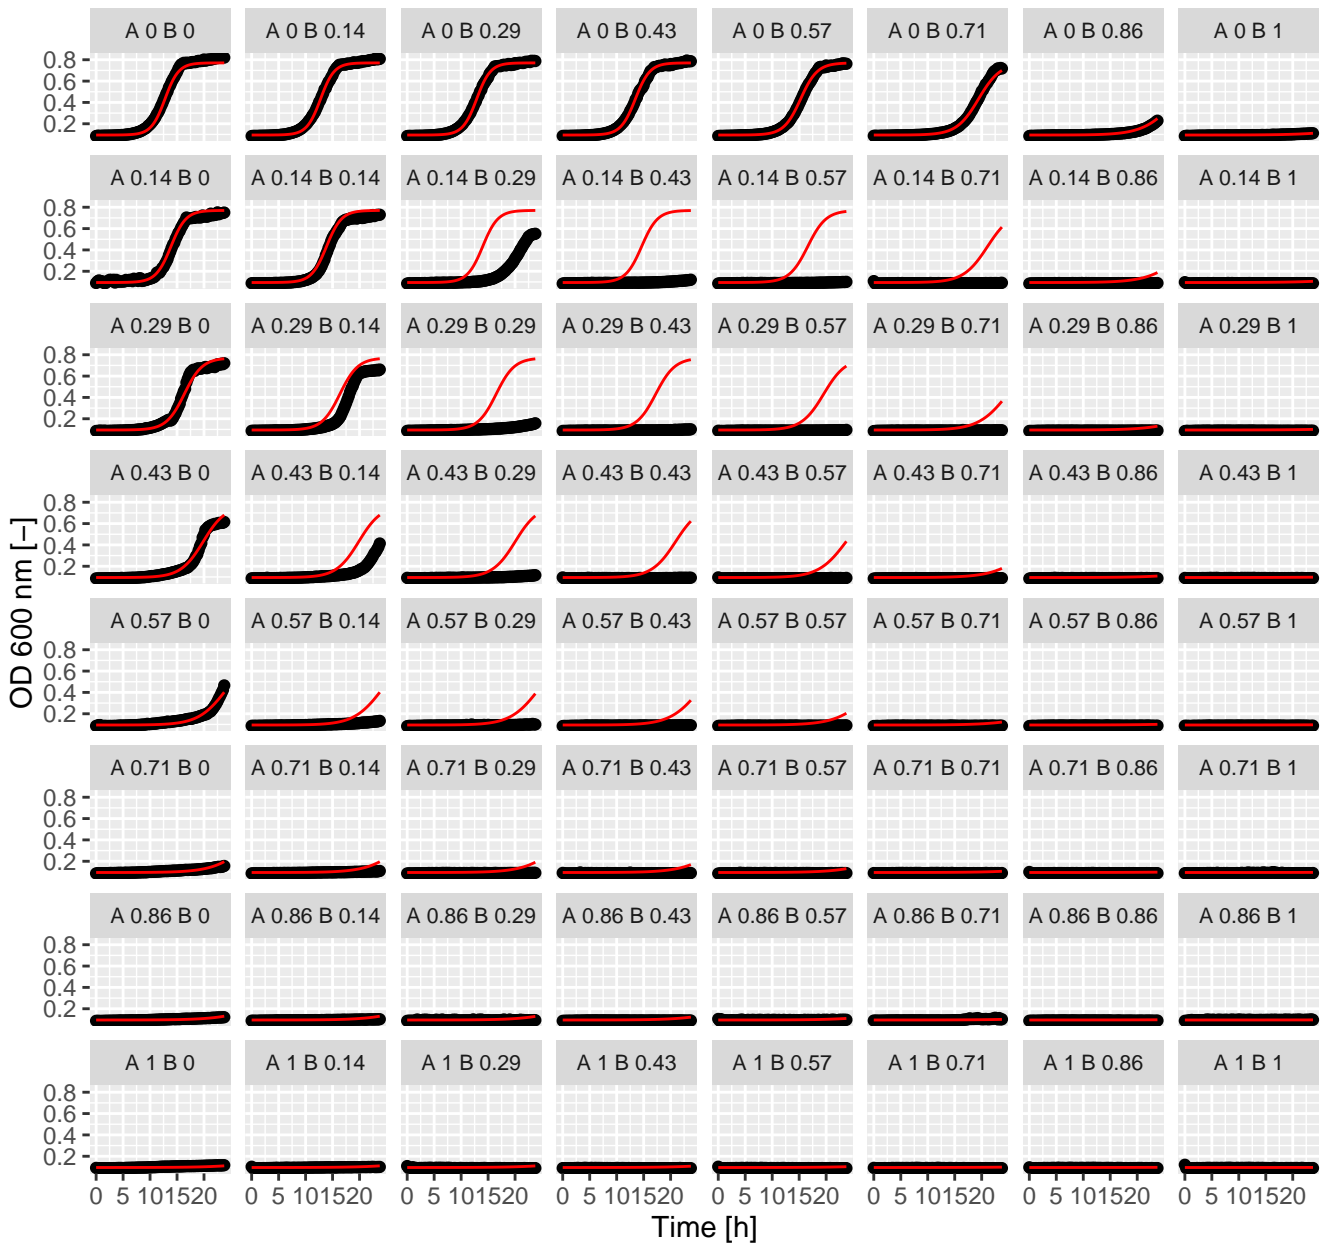

Fen.Sta (= Ax.Bx) full GPDI  
 Int\_AB = -0.1 and Int\_BA = -0.76 at EC50

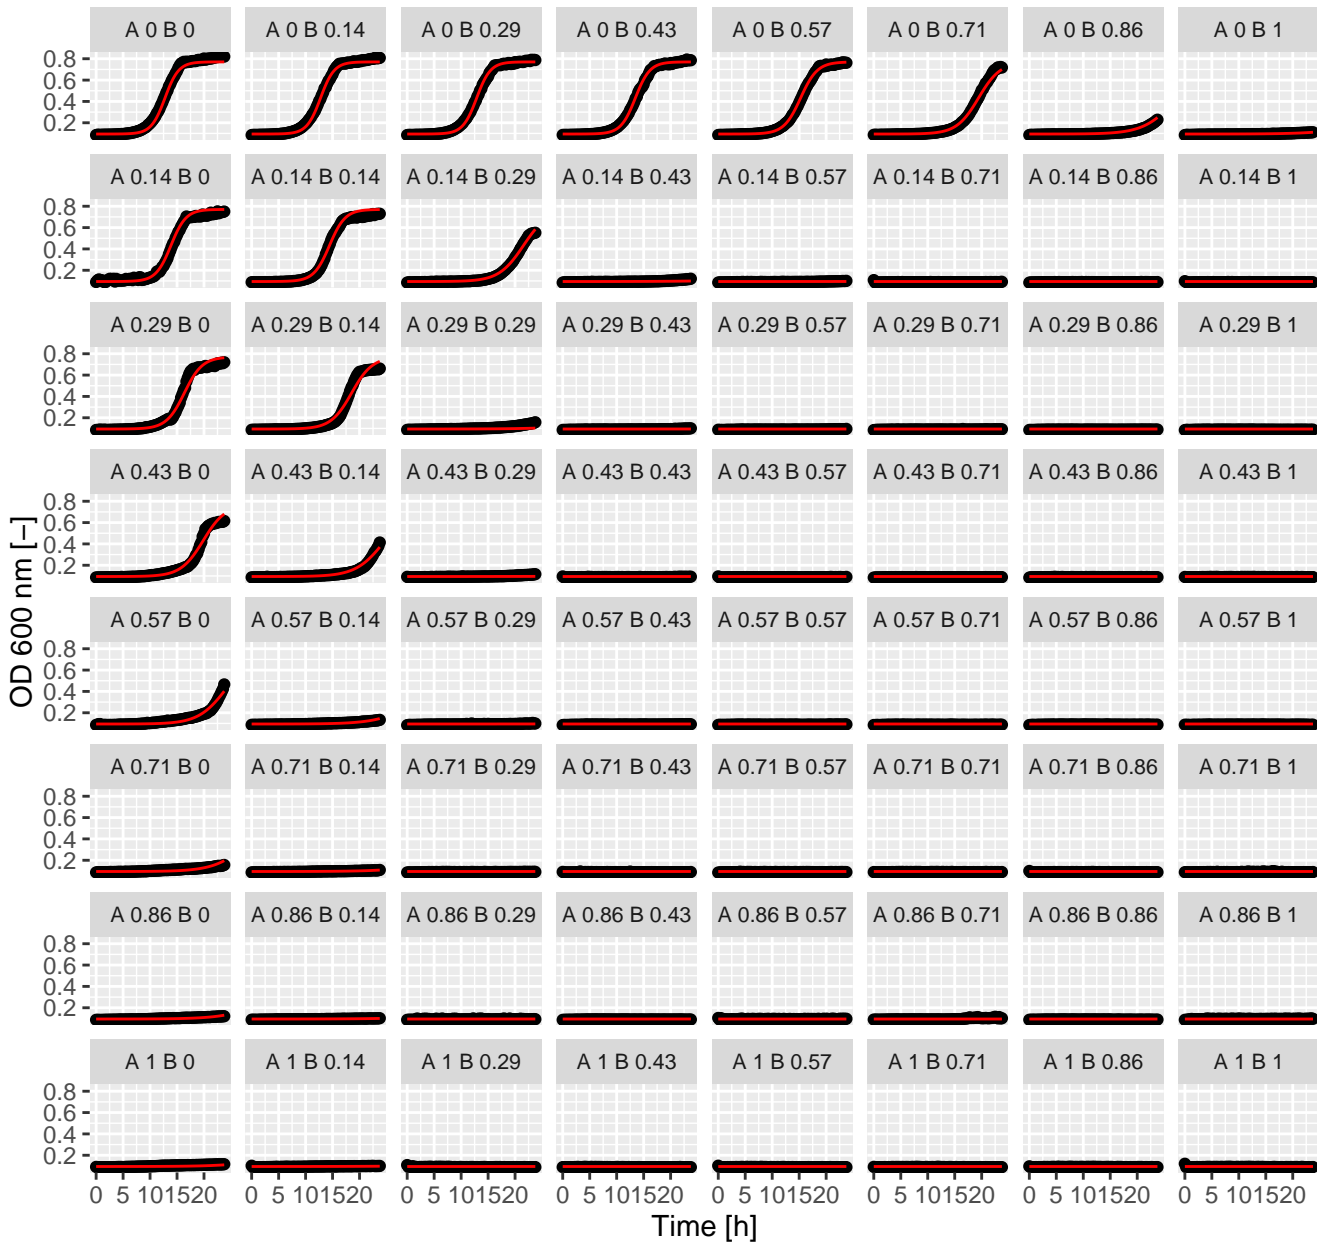



Fen.Rap (= Ax.Bx) exp. additivity (BI)  
Int\_AB = 0 and Int\_BA = 0 at EC50

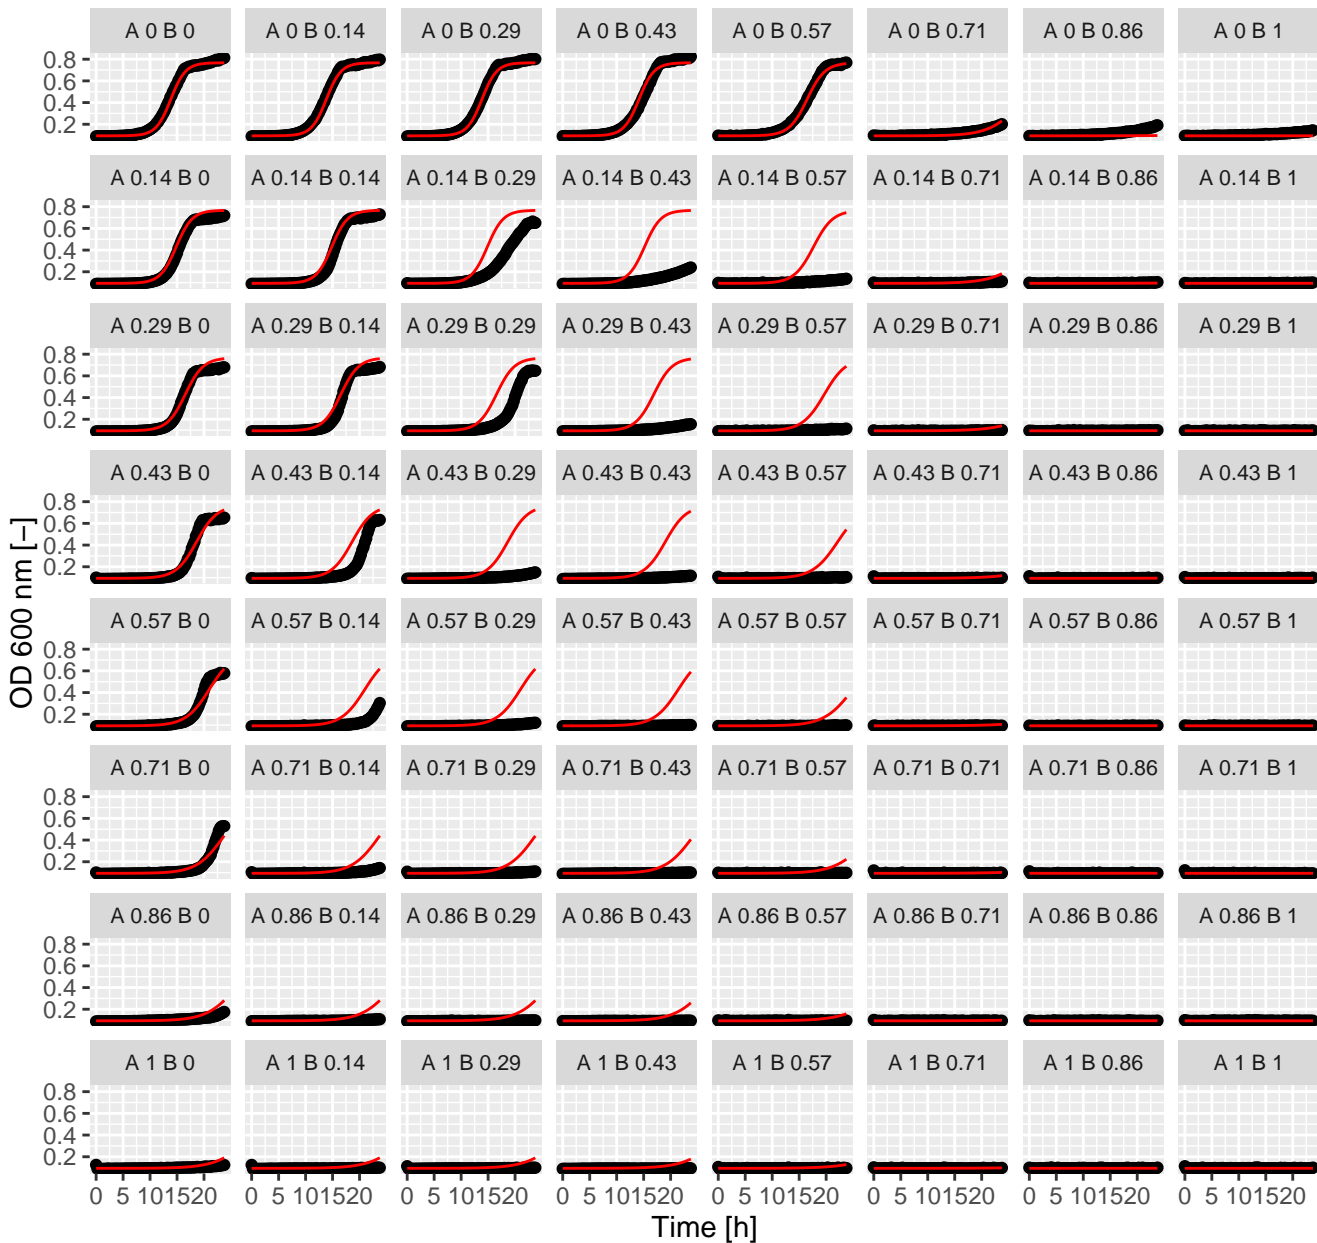

Fen.Rap (= Ax.Bx) full GPDI  
Int\_AB = -0.6 and Int\_BA = -0.47 at EC50

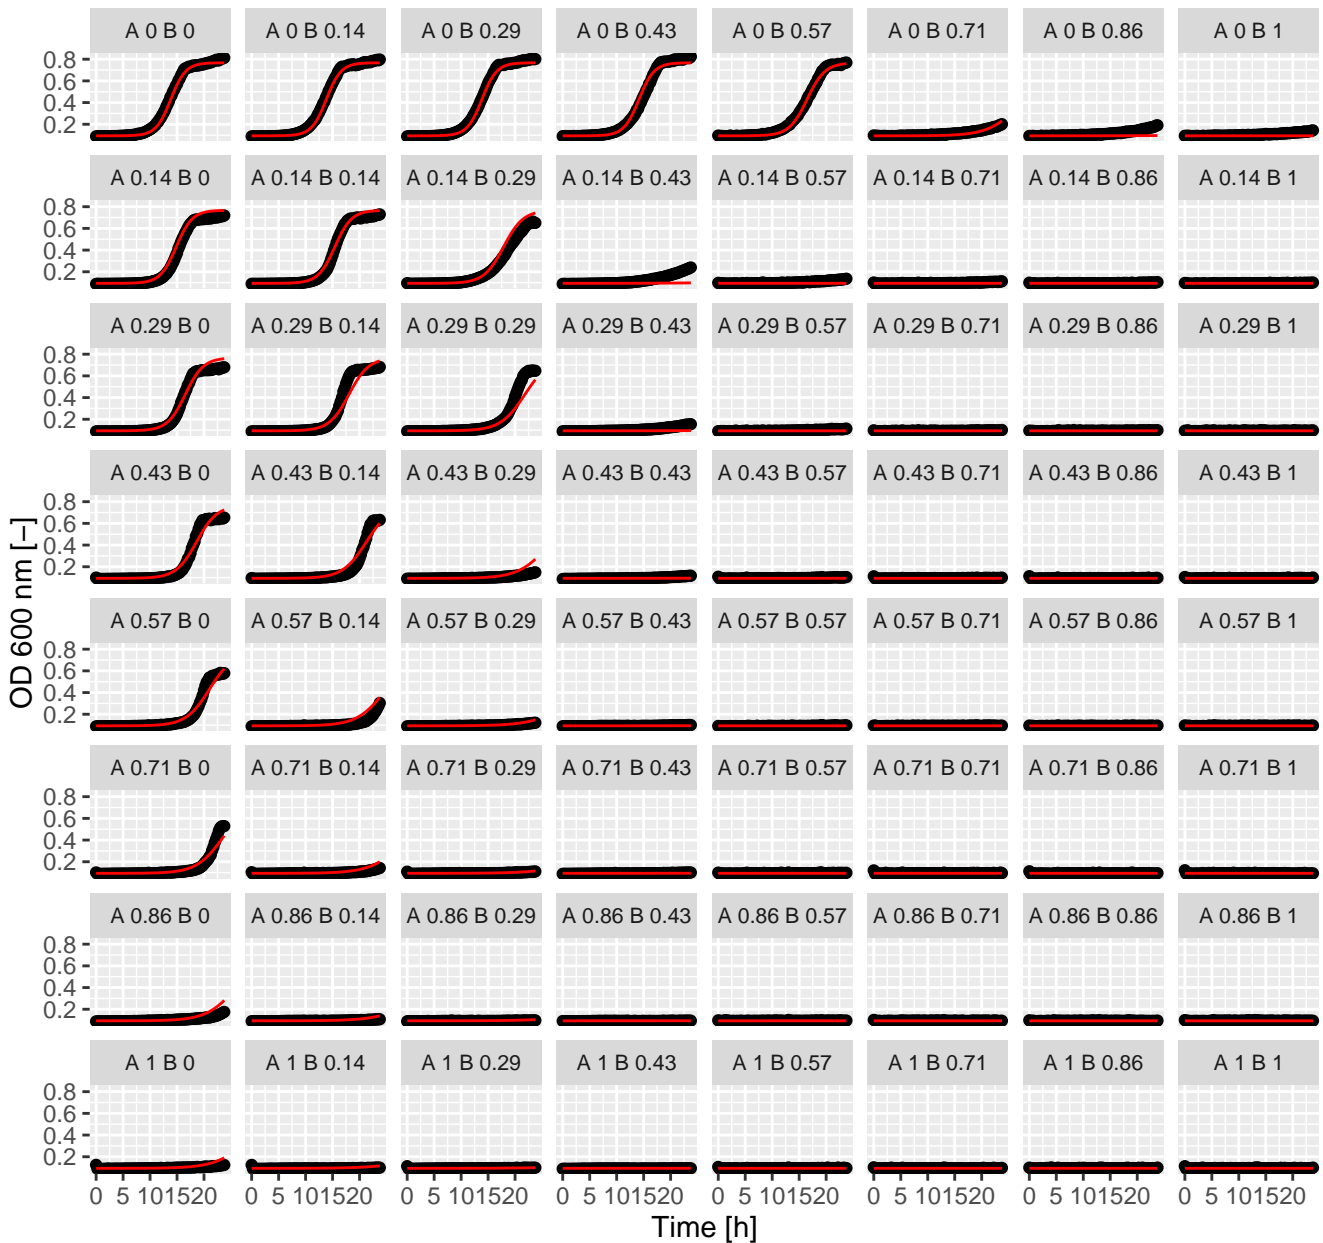

Fen.Pen (= Ax.Bx) exp. additivity (BI)  
Int\_AB = 0 and Int\_BA = 0 at EC50

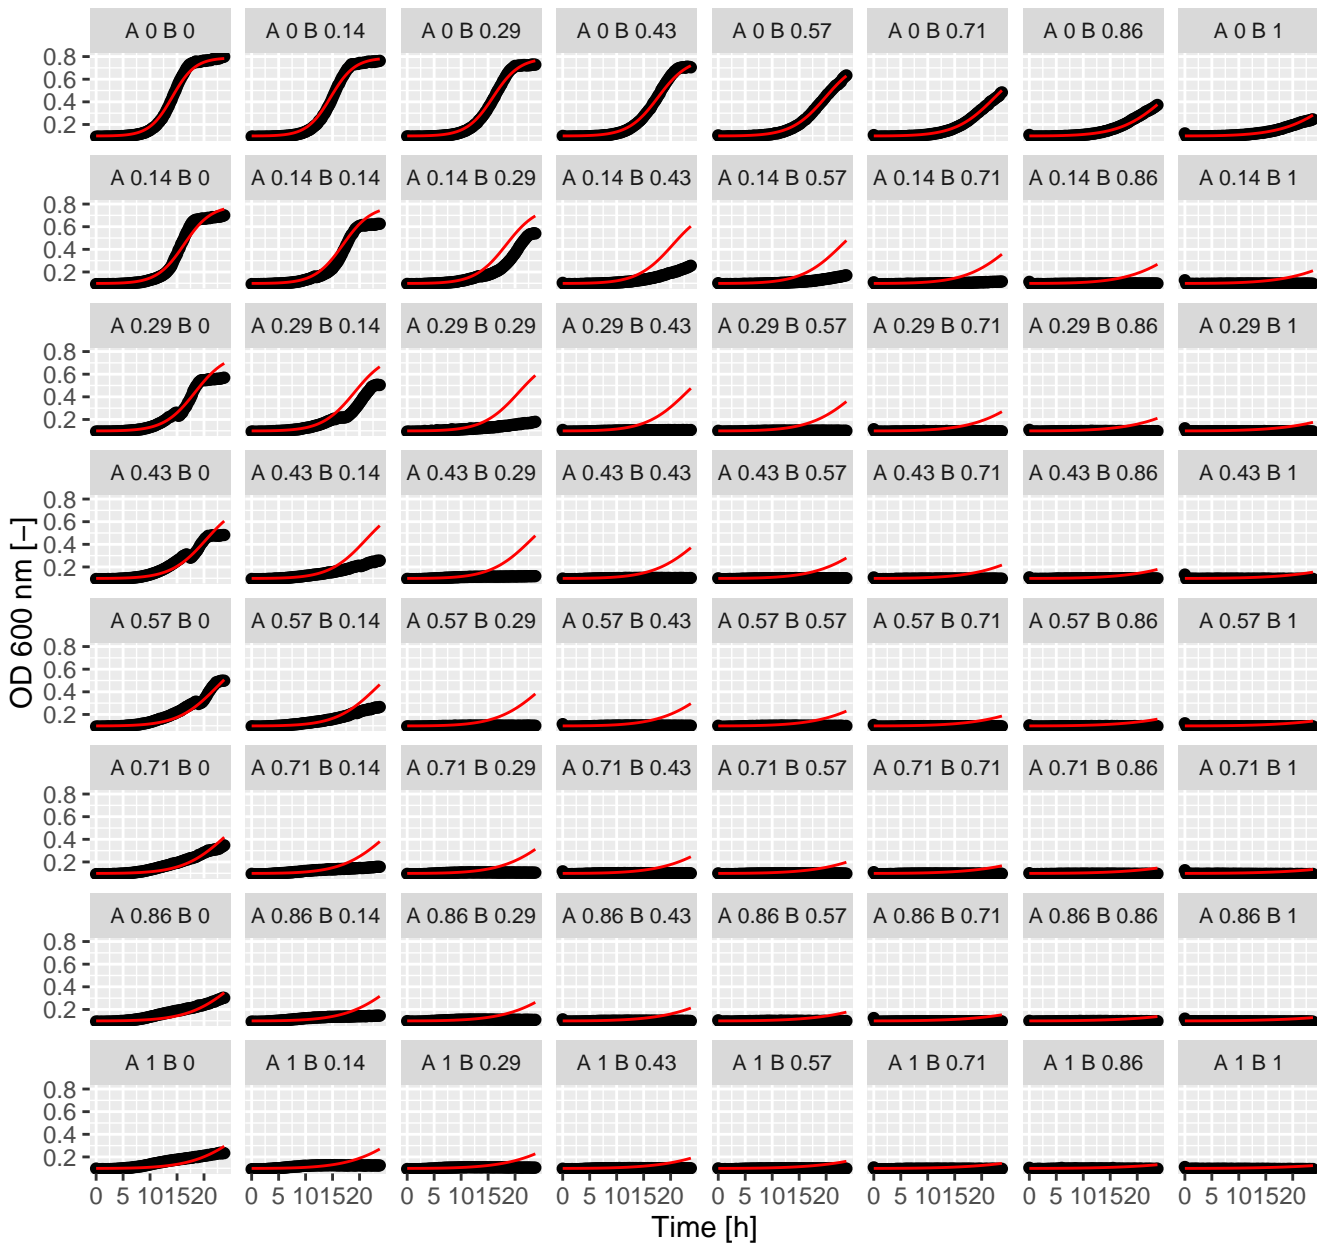

Fen.Pen (= Ax.Bx) full GPDI  
Int\_AB = -0.56 and Int\_BA = -0.75 at EC50

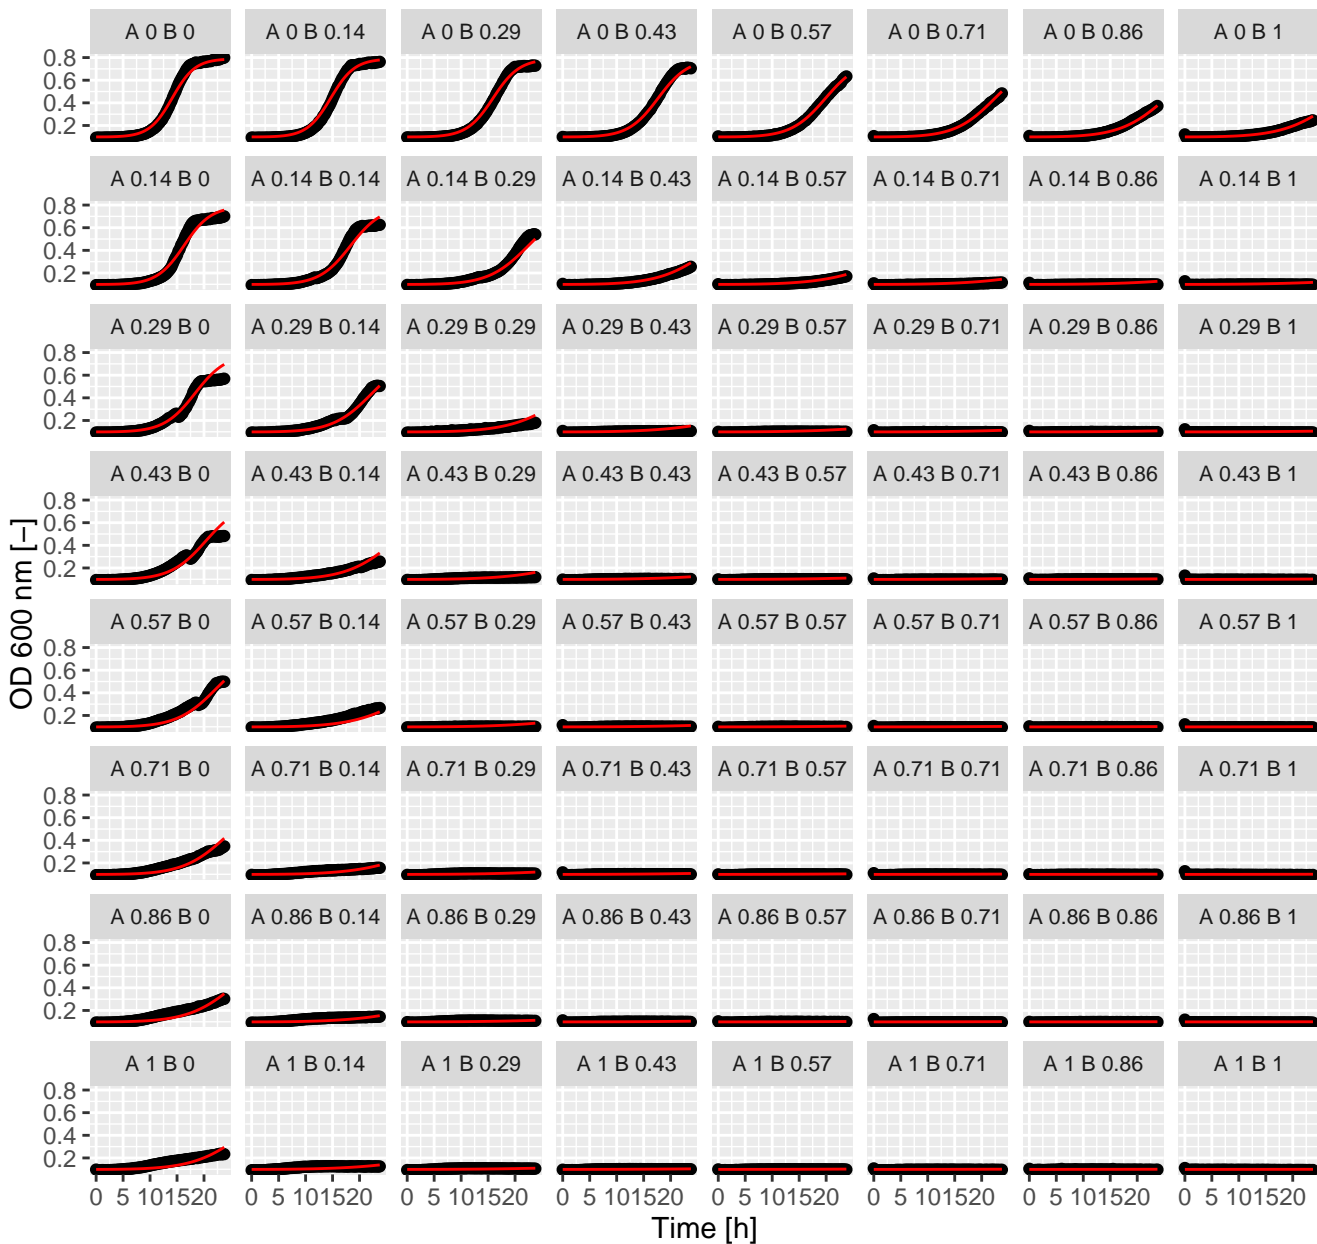

Fen.Lat (= Ax.Bx) exp. additivity (BI)  
Int\_AB = 0 and Int\_BA = 0 at EC50

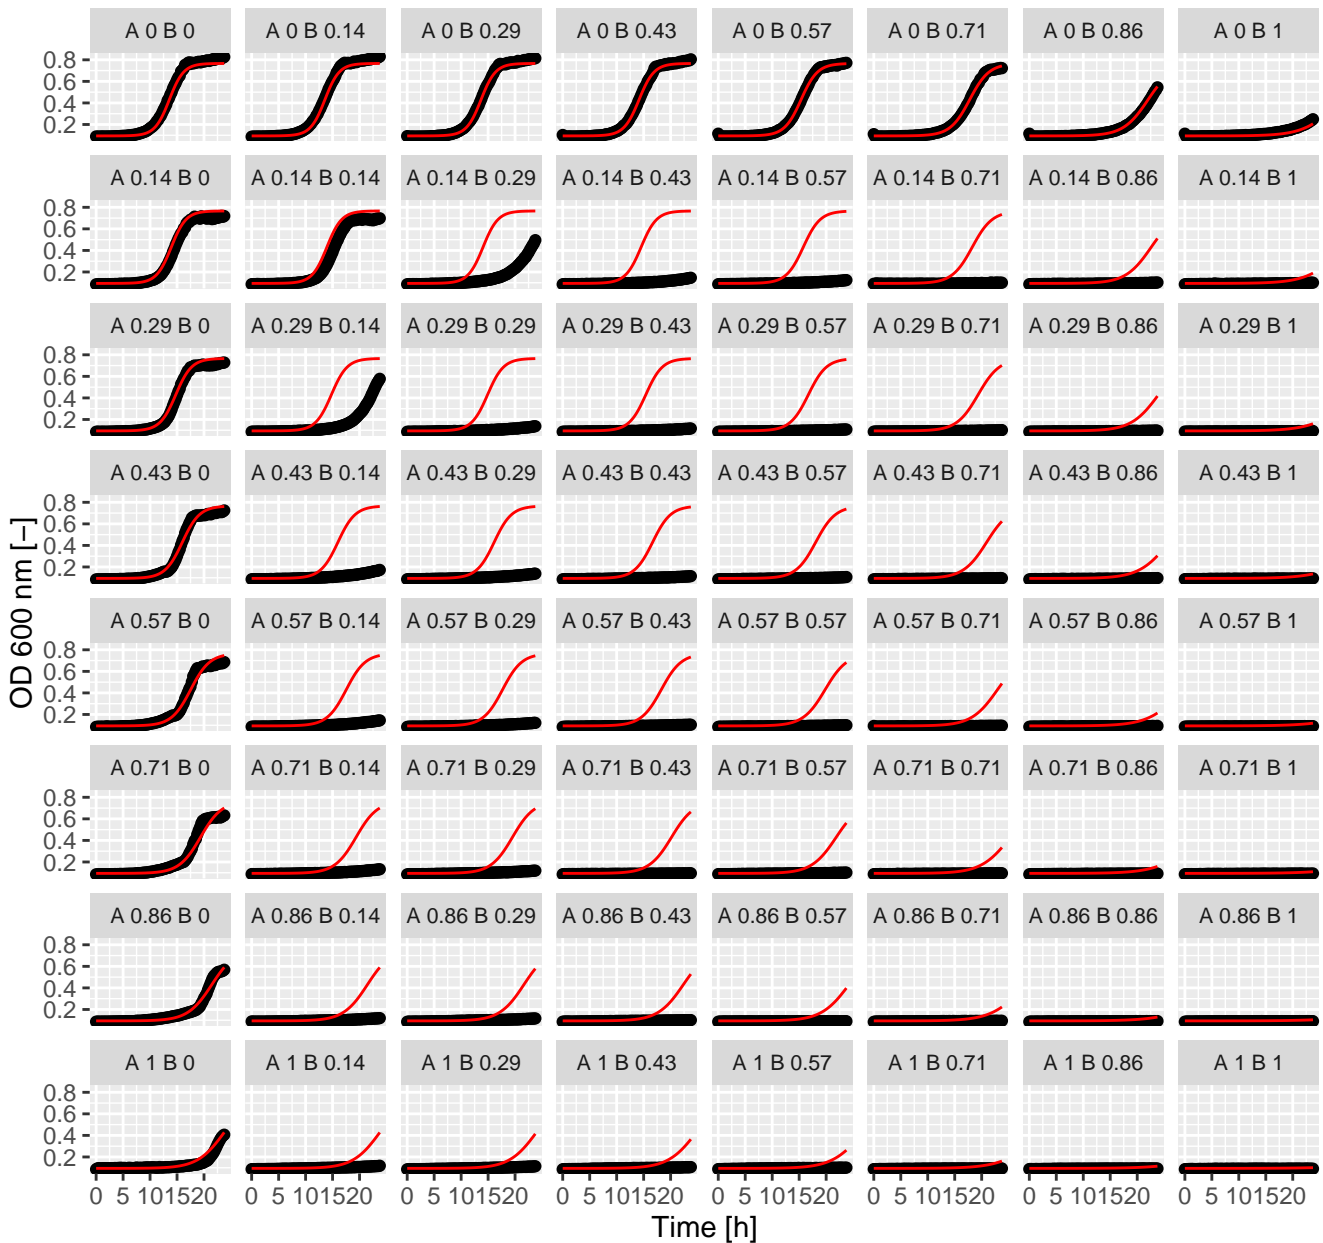

Fen.Lat (= Ax.Bx) full GPDI  
 Int\_AB = -0.58 and Int\_BA = -0.88 at EC50

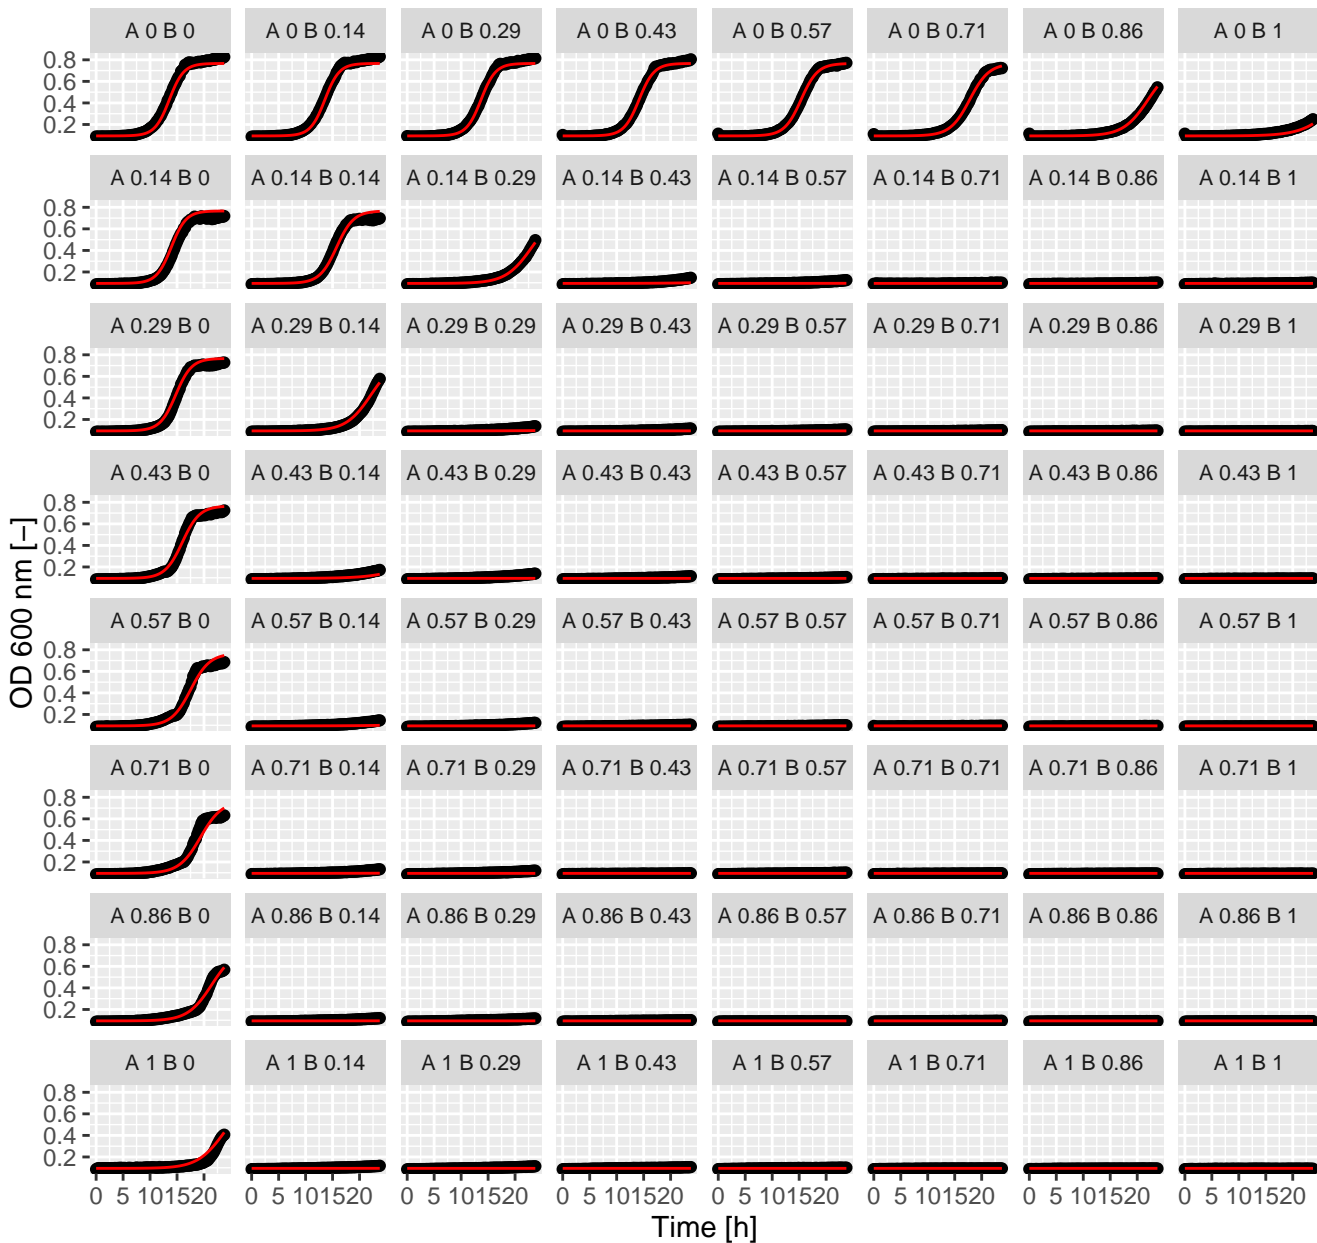

Fen.Hal (= Ax.Bx) exp. additivity (BI)  
 Int\_AB = 0 and Int\_BA = 0 at EC50

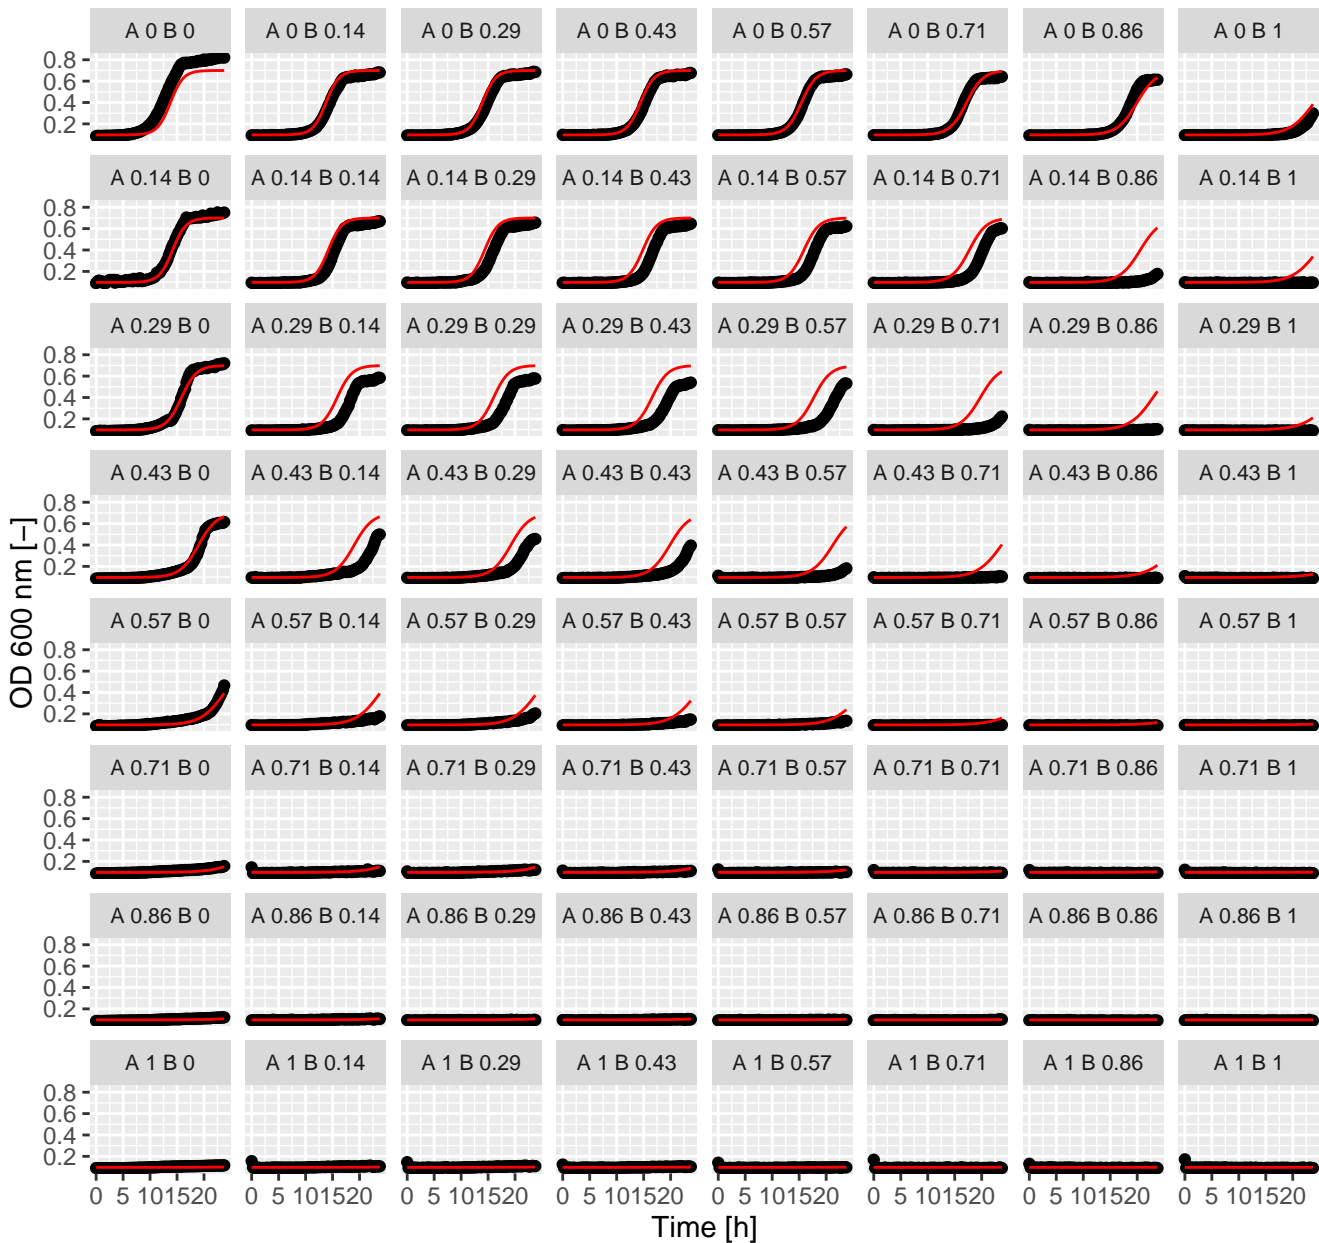

Fen.Hal (= Ax.Bx) full GPDI  
Int\_AB = -0.25 and Int\_BA = -0.22 at EC50

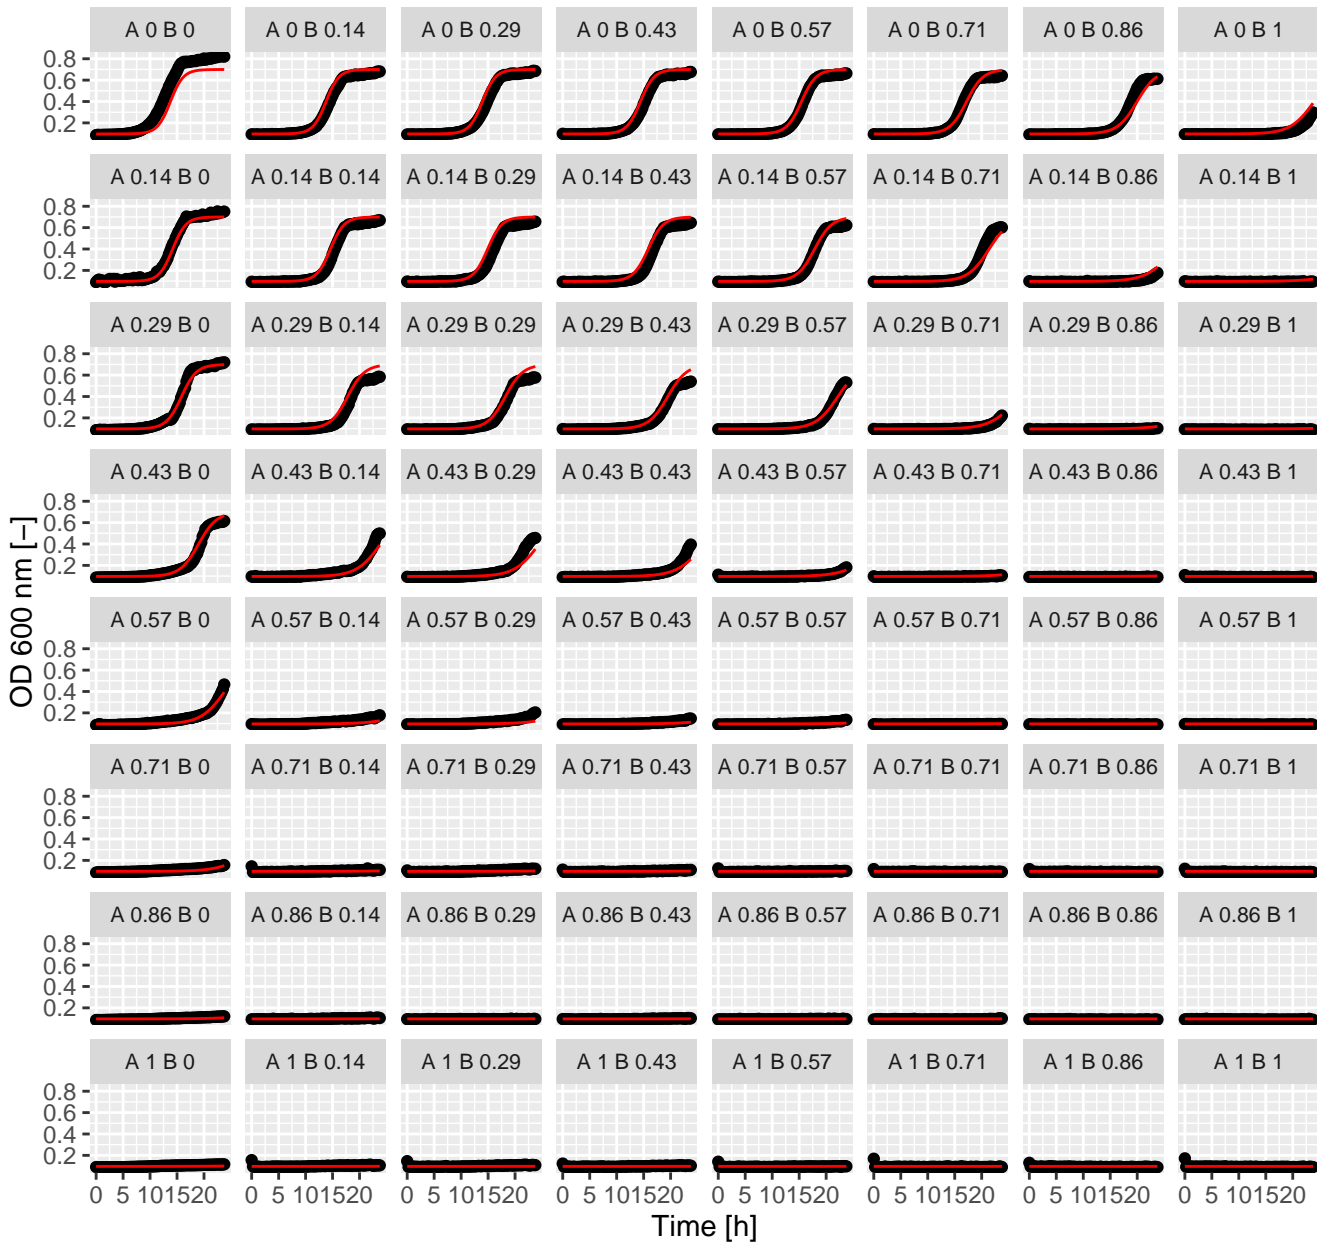



Fen.Fen (= Ax.Bx) exp. additivity (BI)  
 Int\_AB = 0 and Int\_BA = 0 at EC50

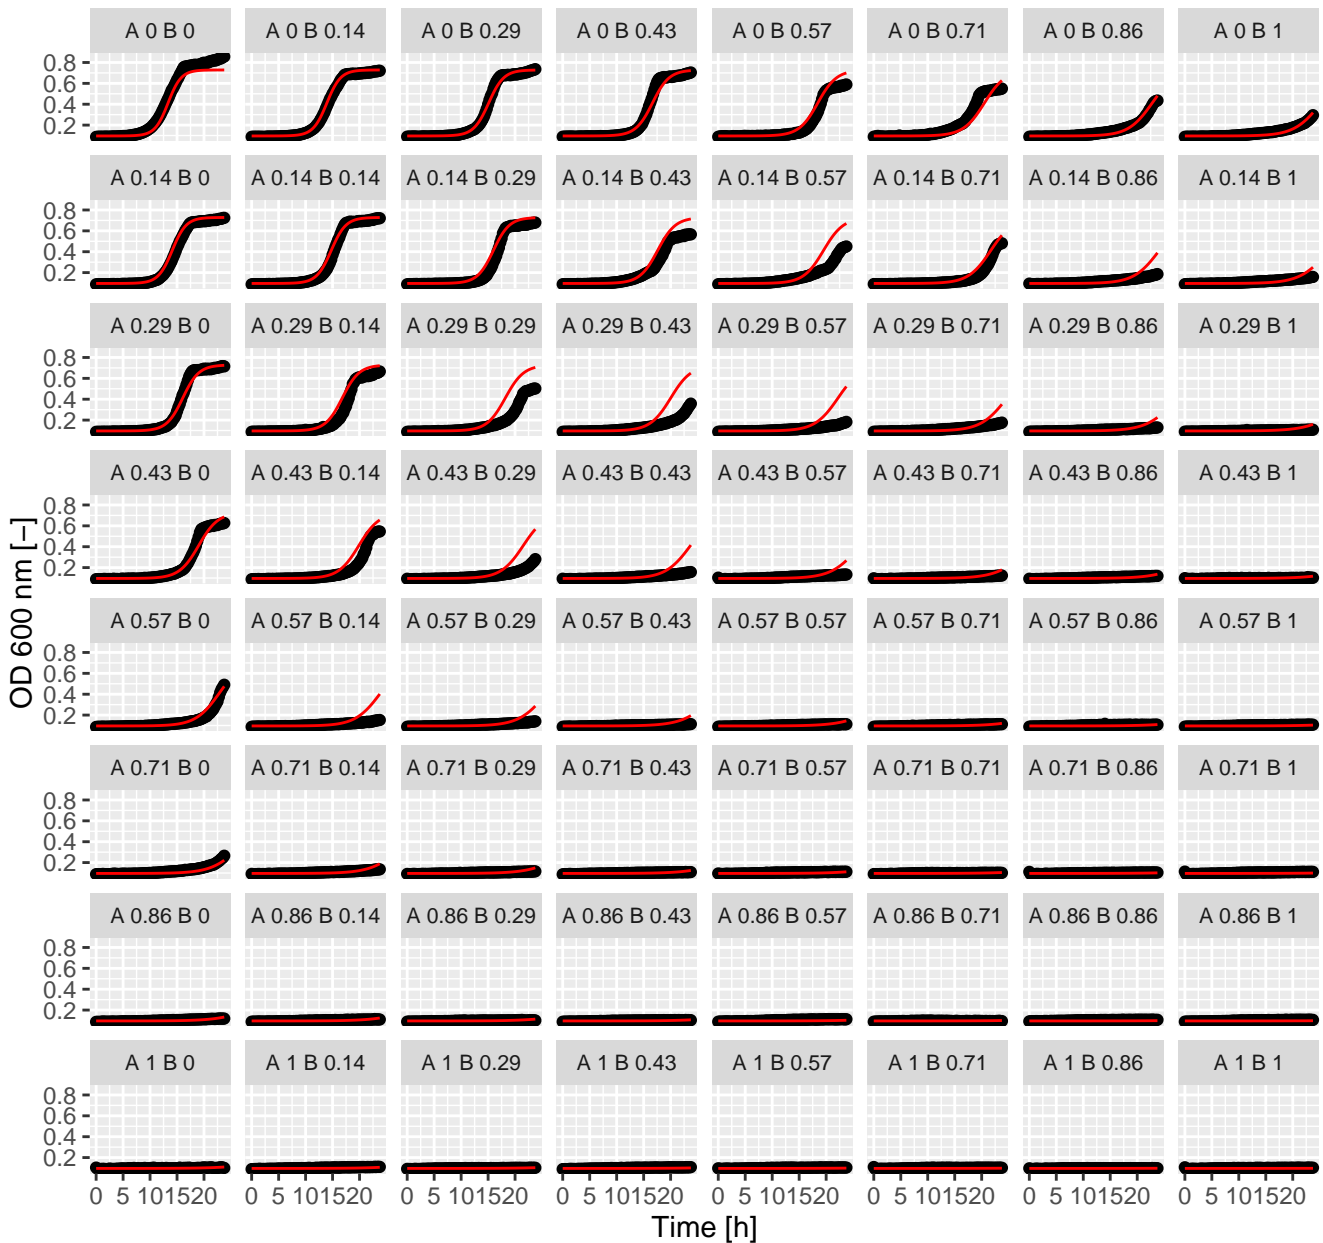

Fen.Fen (= Ax.Bx) full GPDI  
Int\_AB = -0.35 and Int\_BA = -0.25 at EC50

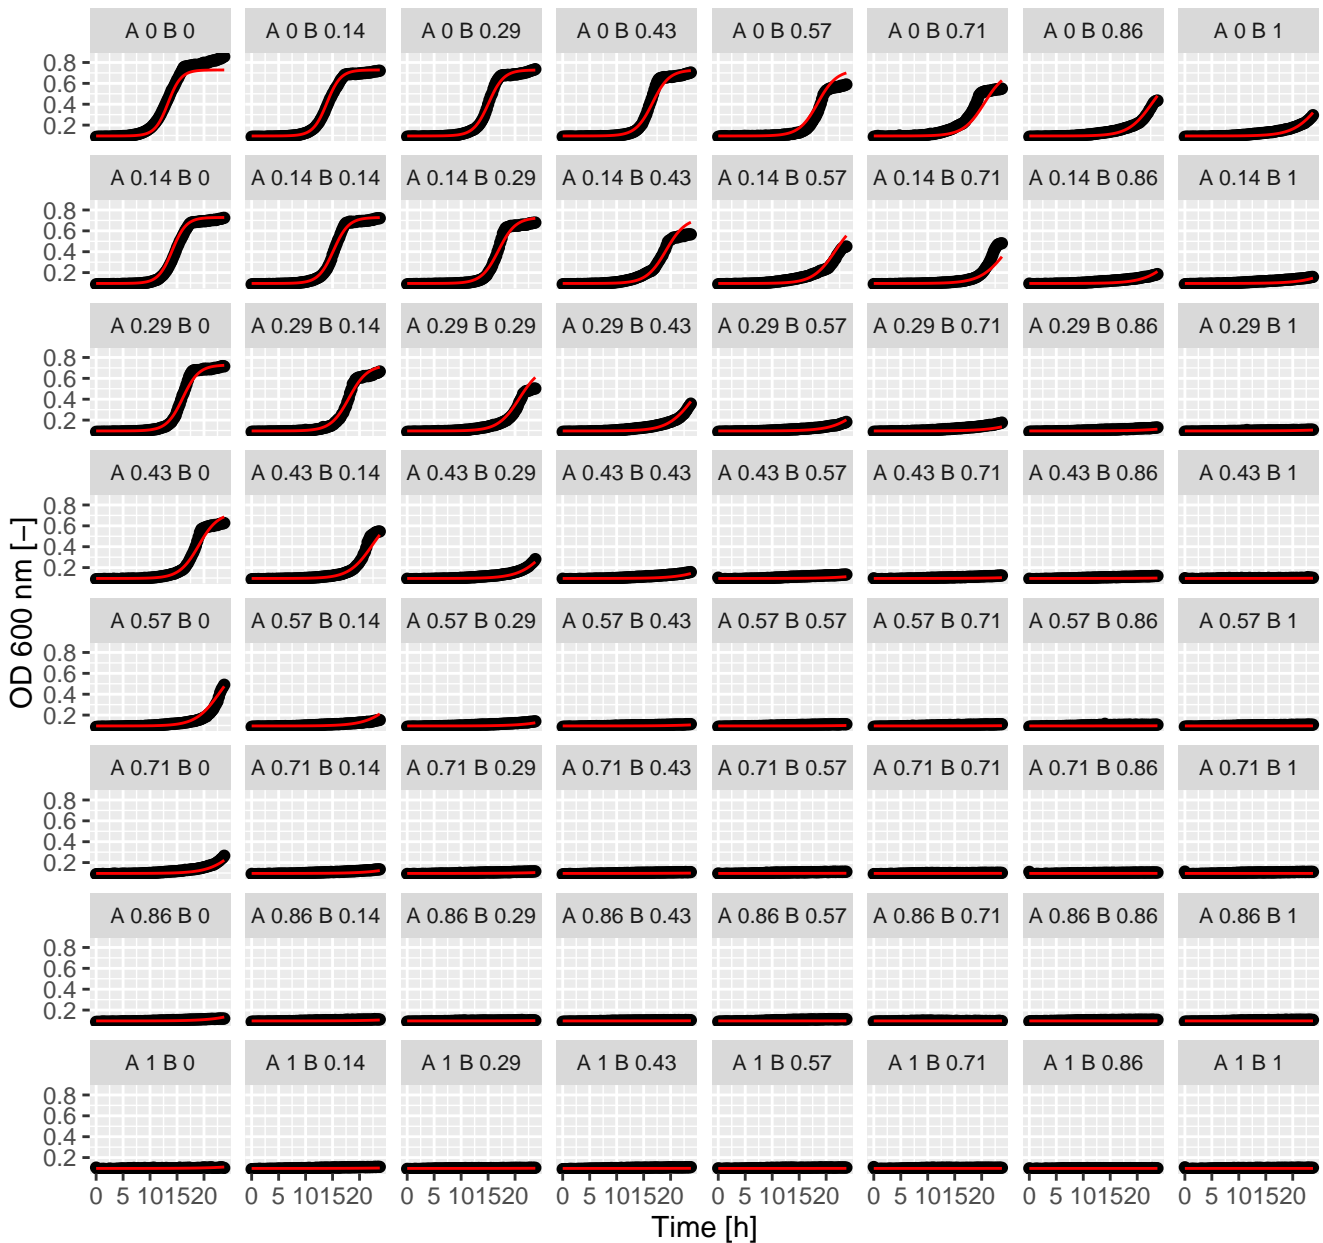

Dyc.Tun (= Ax.Bx) exp. additivity (BI)  
Int\_AB = 0 and Int\_BA = 0 at EC50

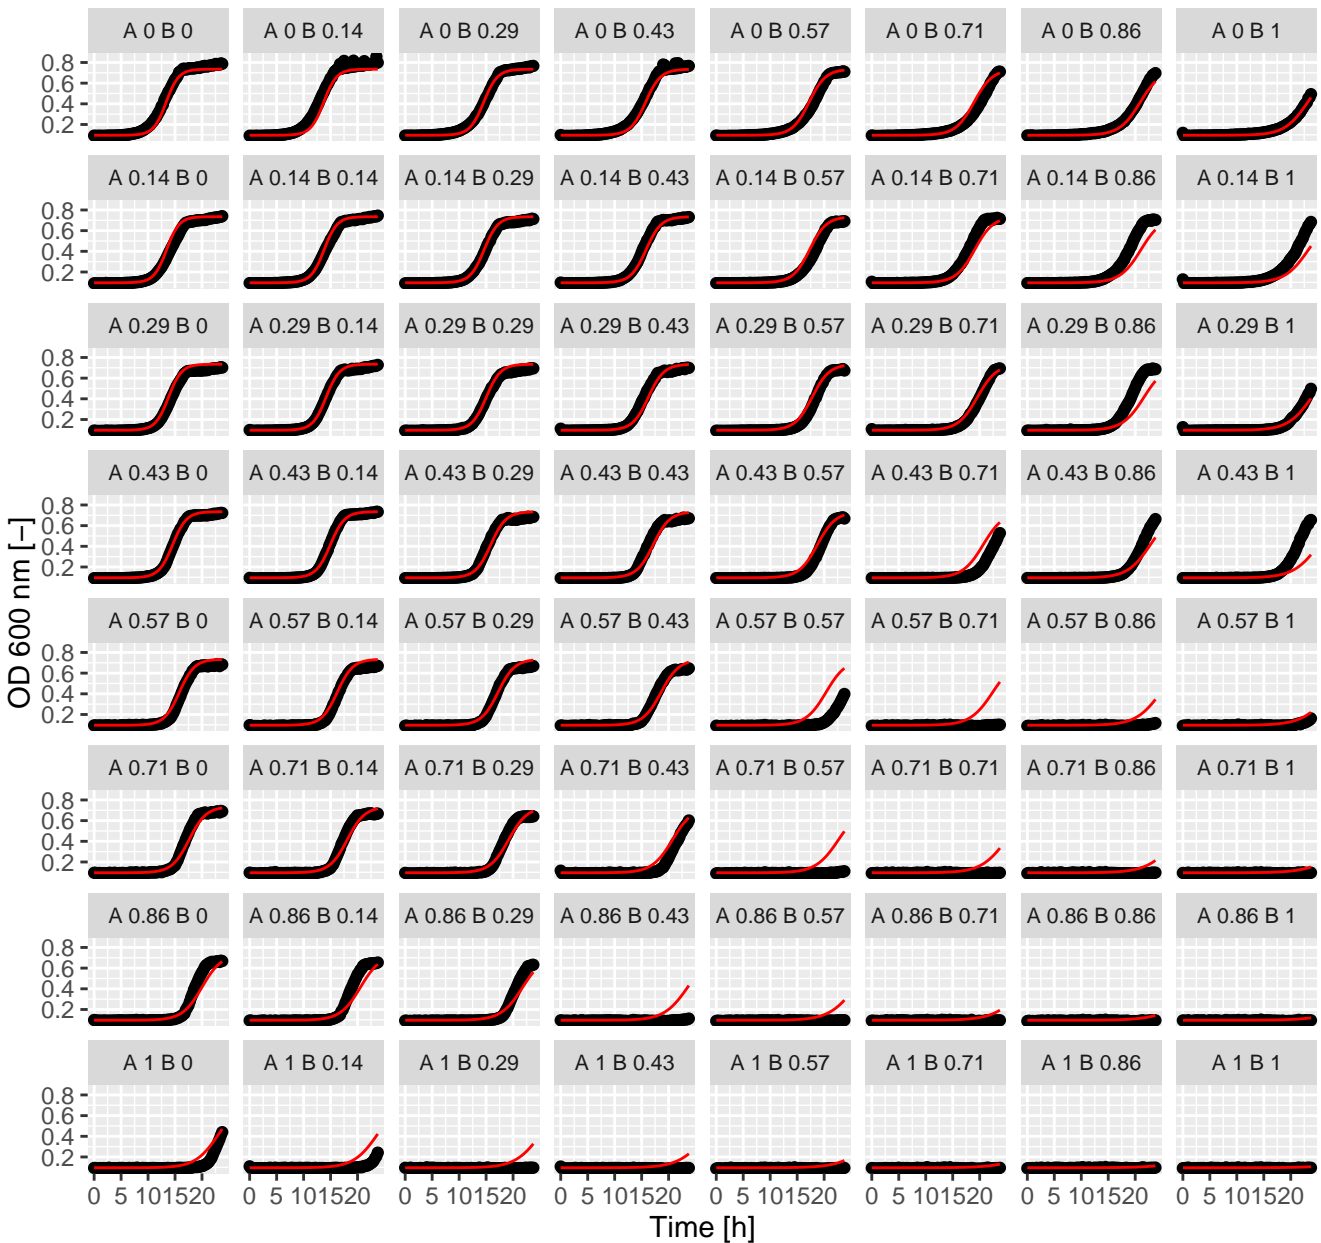

Dyc.Tun (= Ax.Bx) full GPDI  
Int\_AB = -0.31 and Int\_BA = 0.14 at EC50

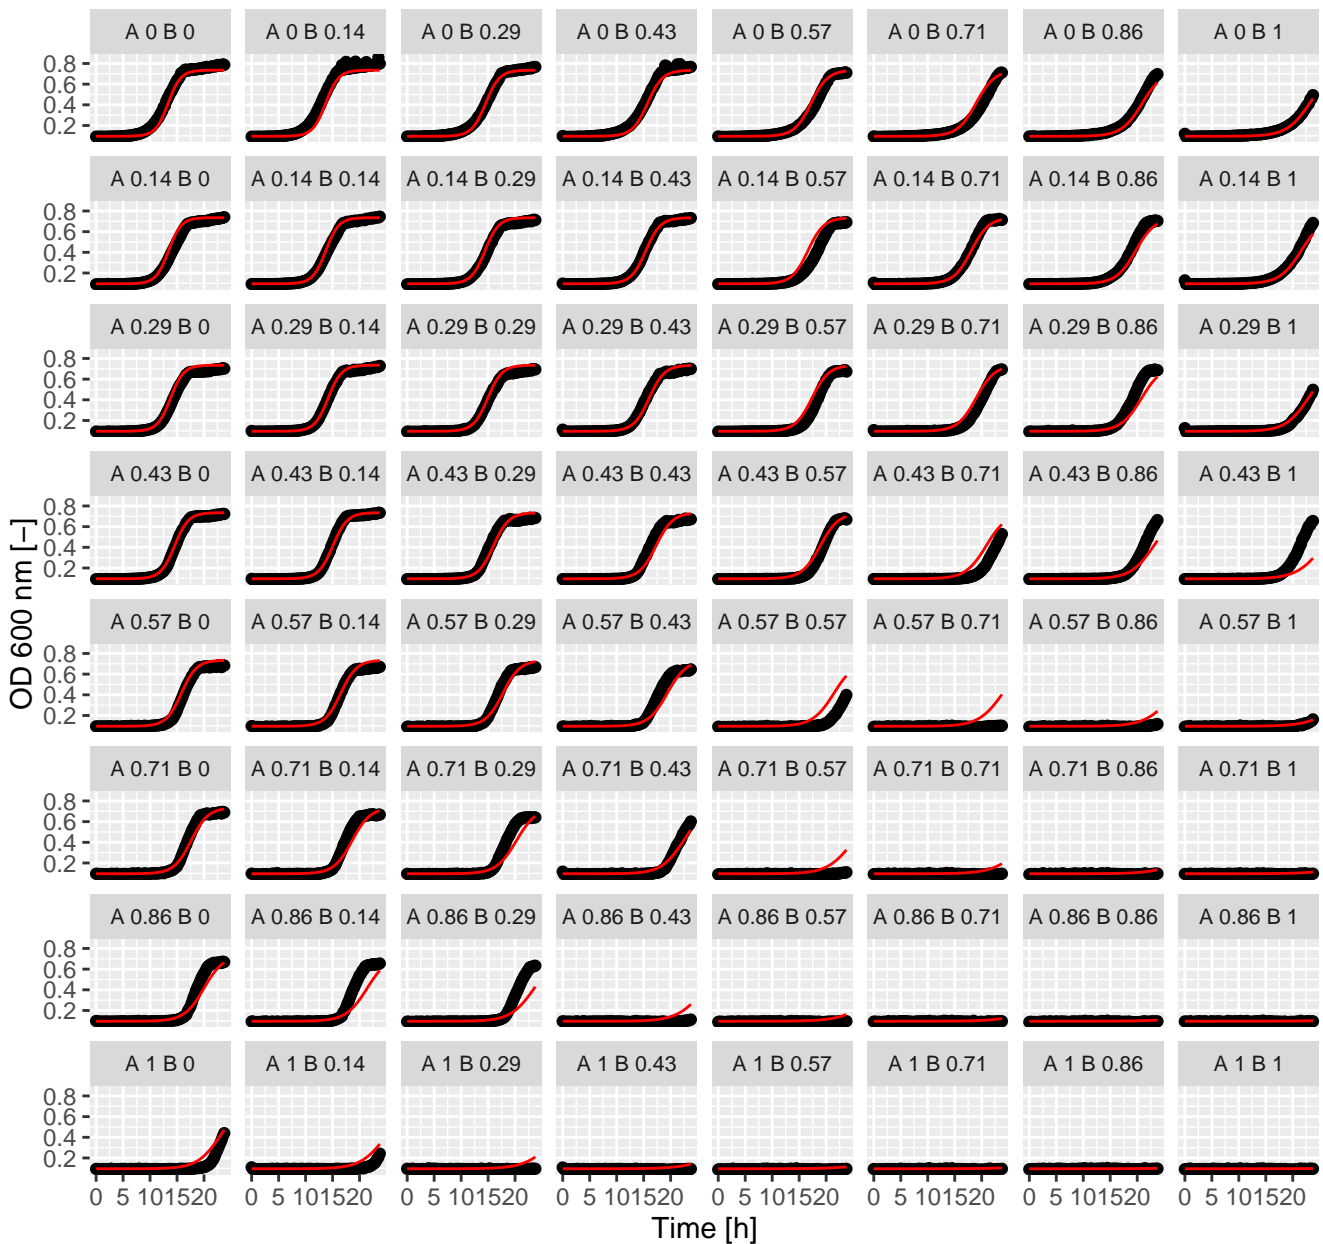

Dyc.Ter (= Ax.Bx) exp. additivity (BI)  
Int\_AB = 0 and Int\_BA = 0 at EC50

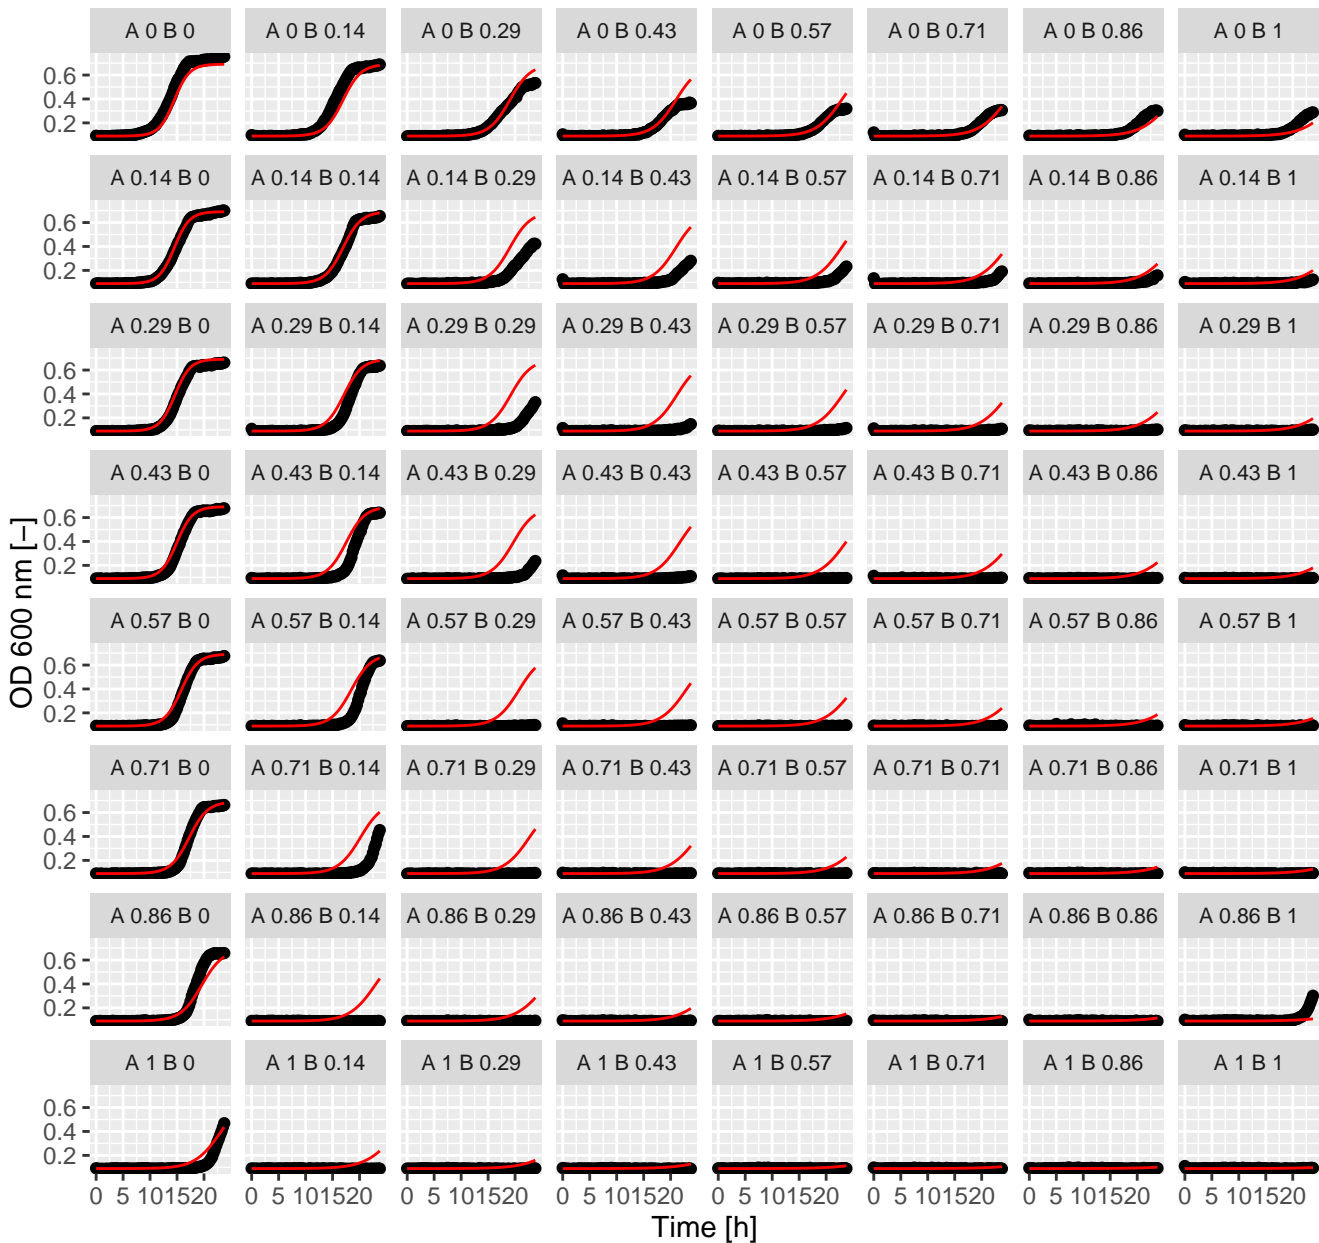

Dyc.Ter (= Ax.Bx) full GPDI  
Int\_AB = -0.59 and Int\_BA = -0.45 at EC50

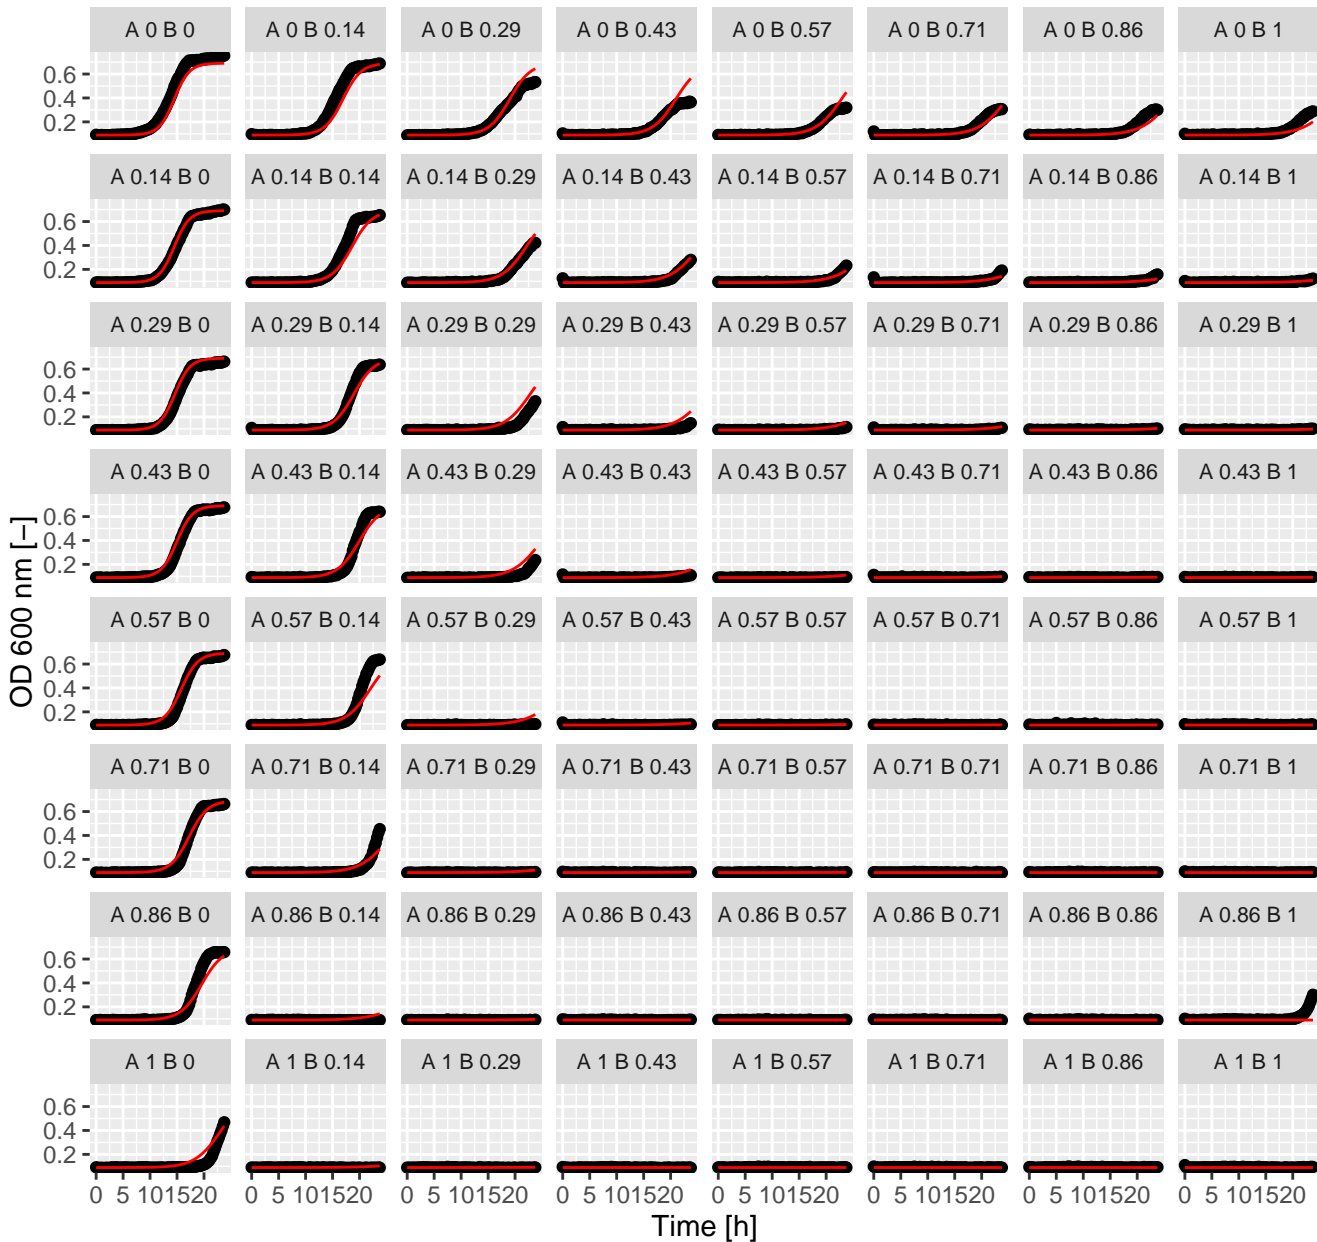

Dyc.Tac (= Ax.Bx) exp. additivity (BI)  
Int\_AB = 0 and Int\_BA = 0 at EC50

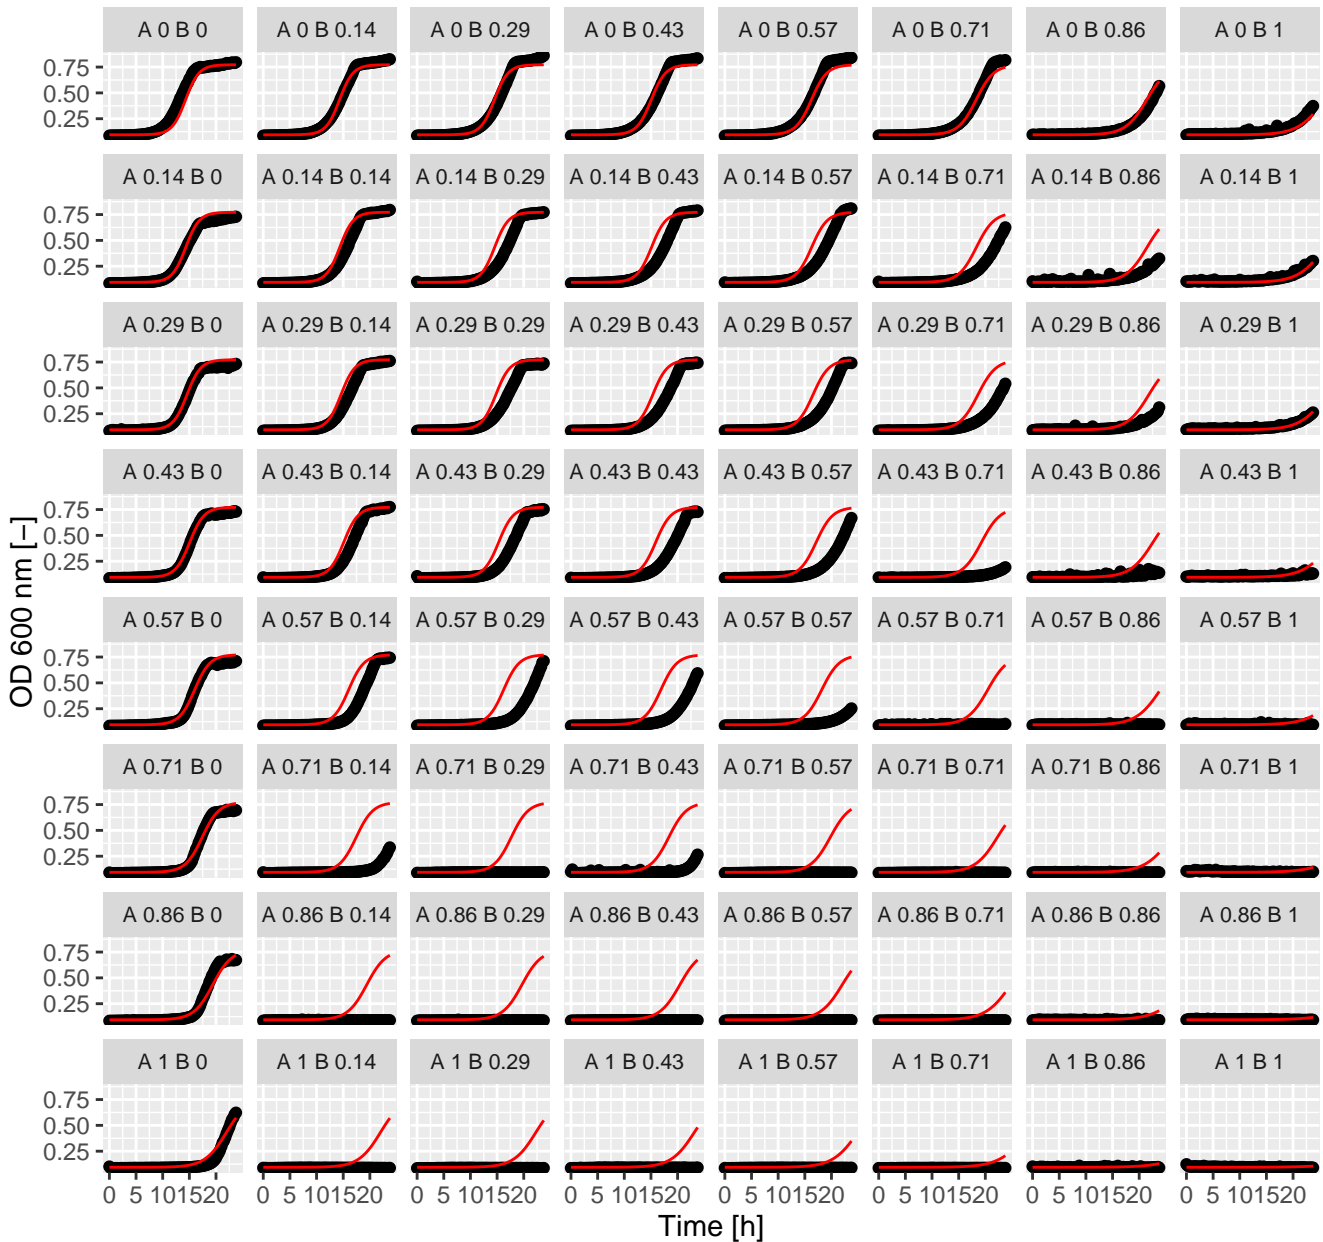

Dyc.Tac (= Ax.Bx) full GPDI  
 Int\_AB = -0.43 and Int\_BA = -0.17 at EC50

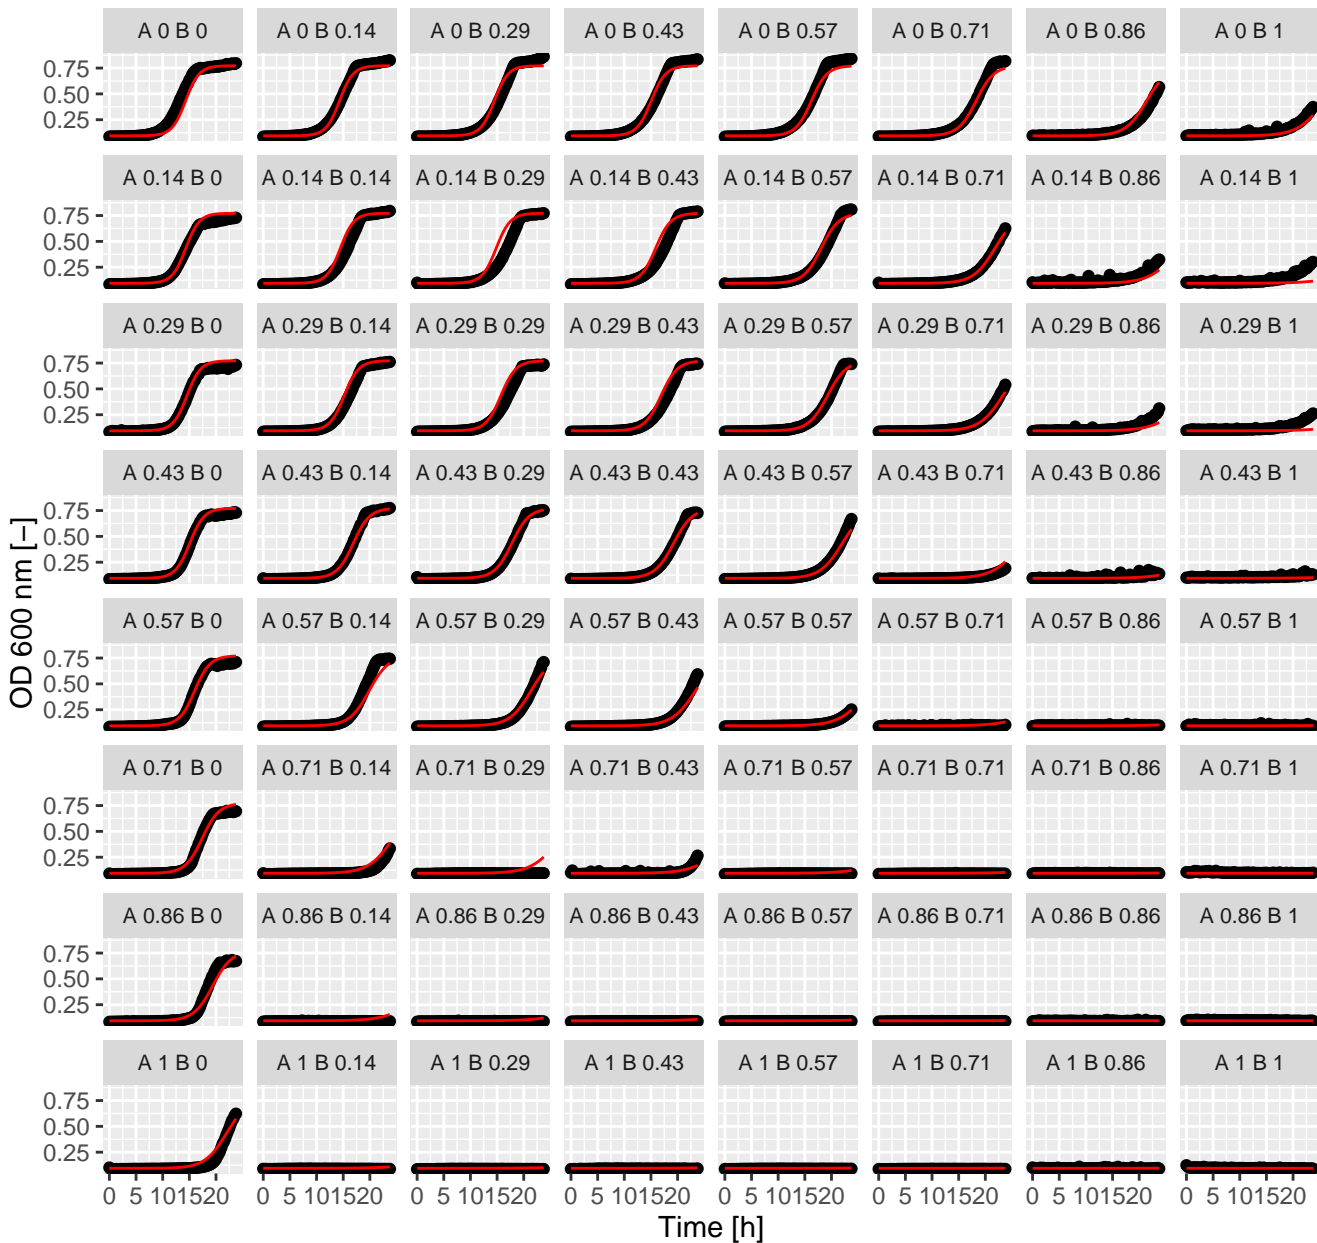



Dyc.Sta (= Ax.Bx) exp. additivity (BI)  
Int\_AB = 0 and Int\_BA = 0 at EC50

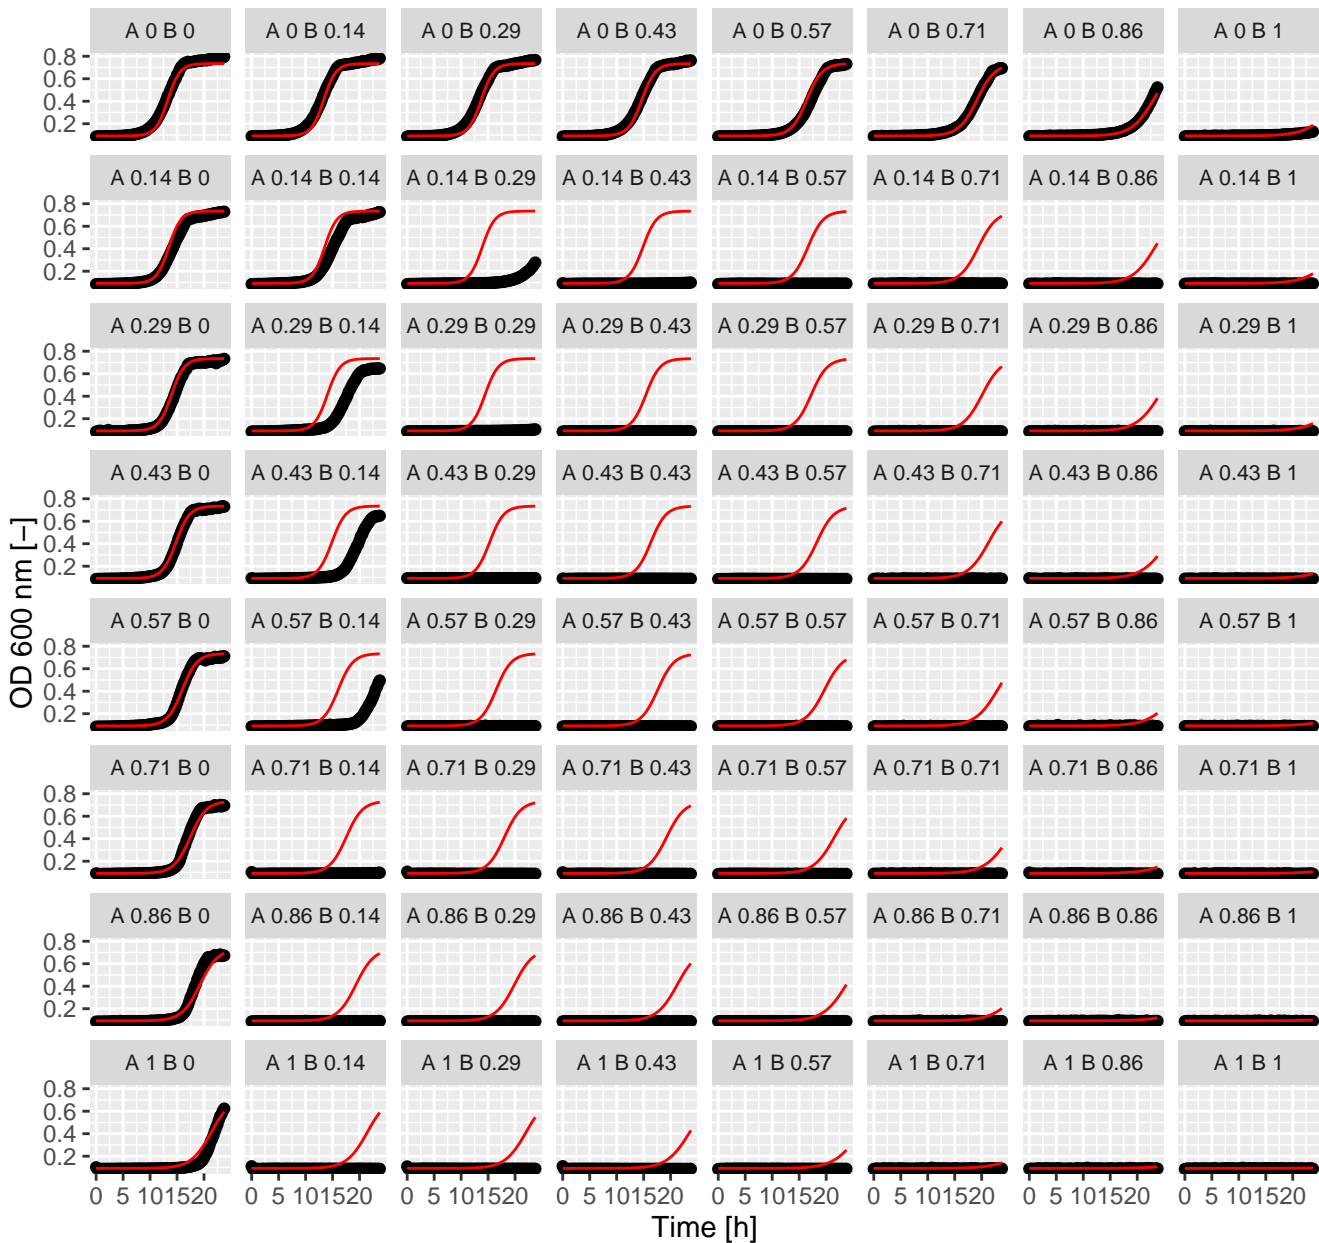

Dyc.Sta (= Ax.Bx) full GPDI  
Int\_AB = -0.77 and Int\_BA = -0.76 at EC50

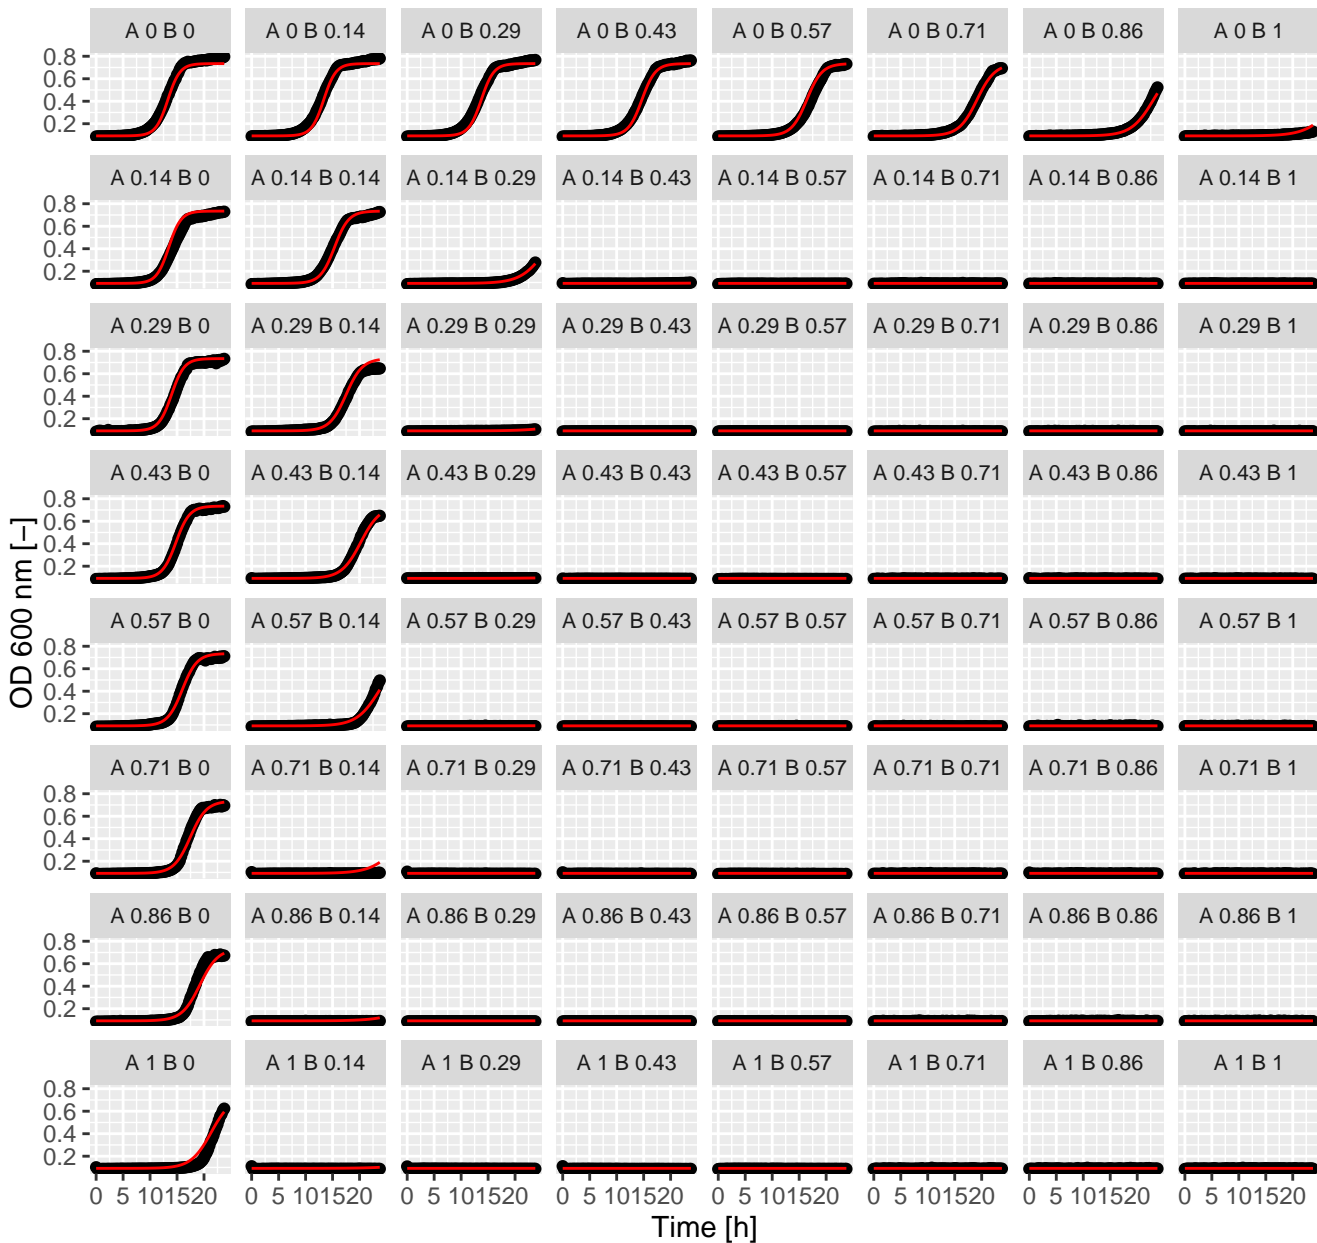

Dyc.Rap (= Ax.Bx) exp. additivity (BI)  
 Int\_AB = 0 and Int\_BA = 0 at EC50

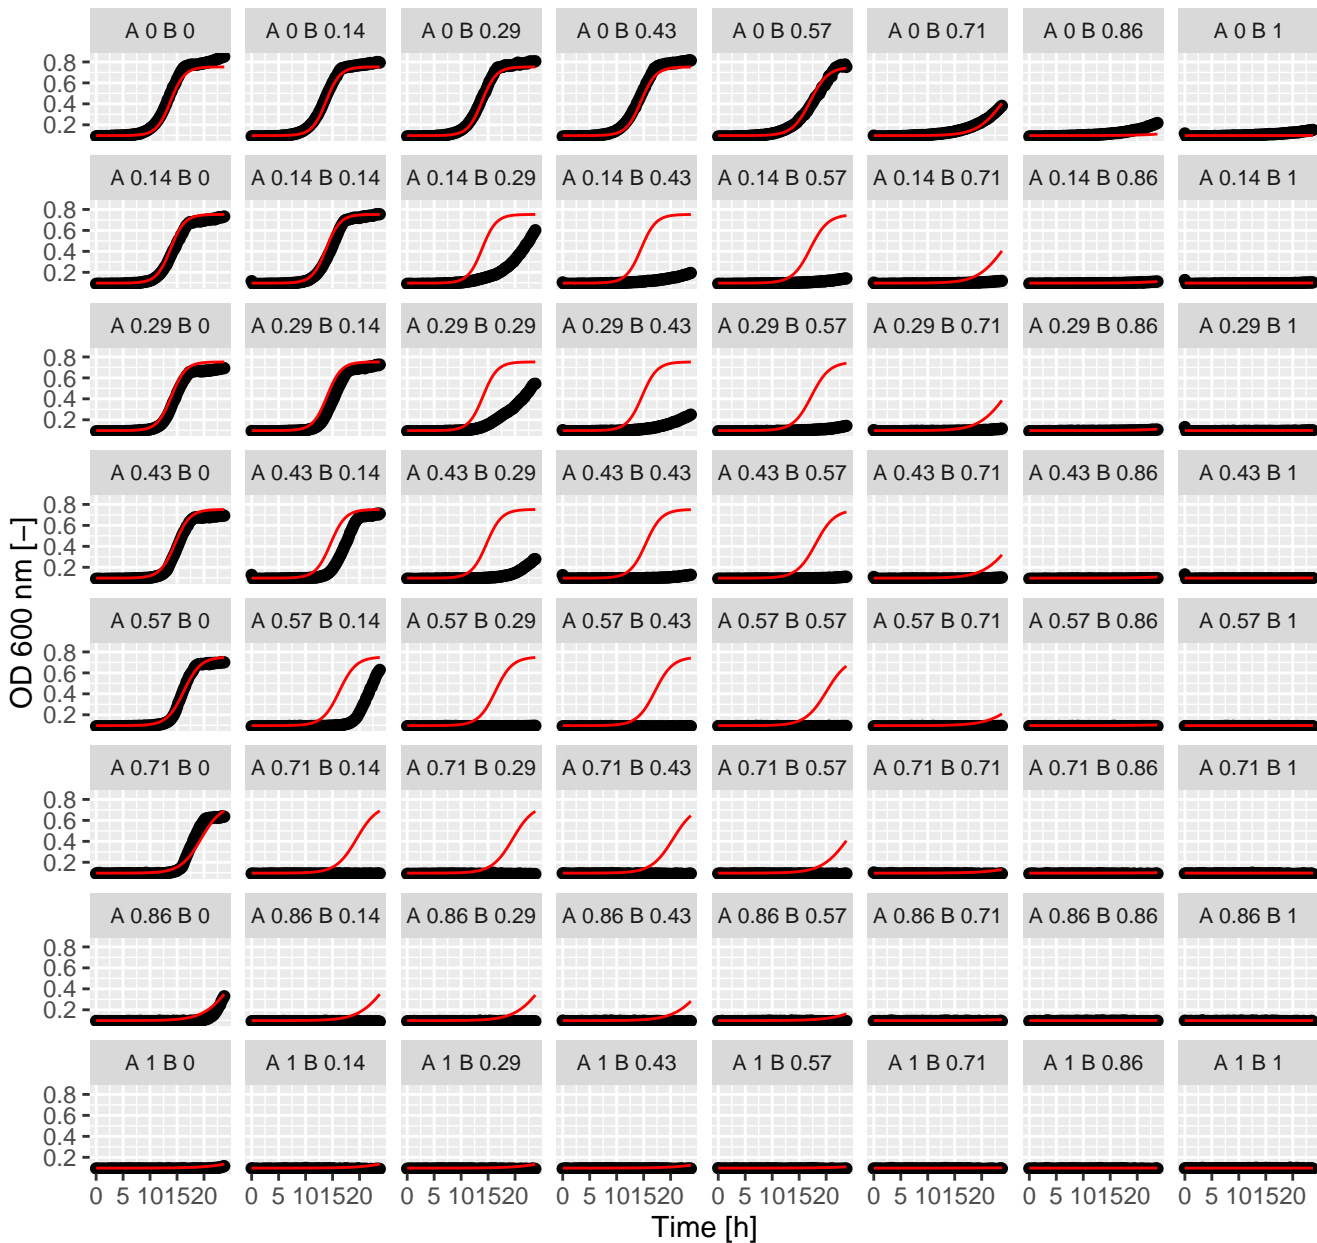

Dyc.Rap (= Ax.Bx) full GPDI  
Int\_AB = -0.29 and Int\_BA = -0.57 at EC50

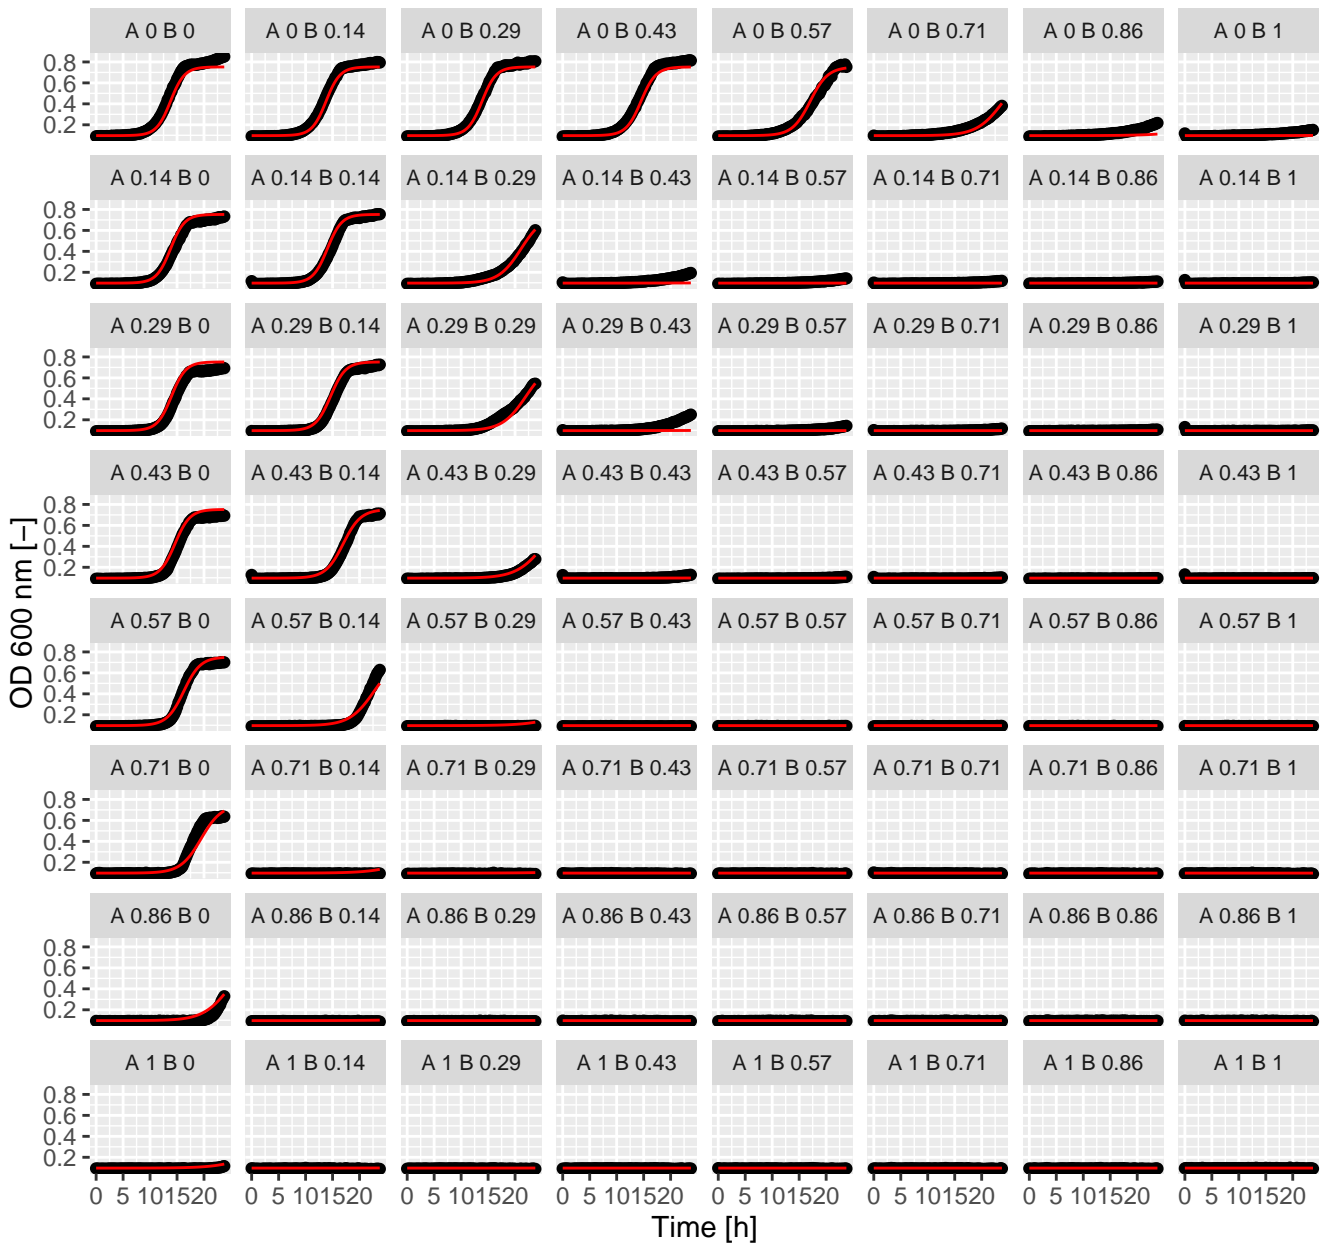

Dyc.Pen (= Ax.Bx) exp. additivity (BI)  
Int\_AB = 0 and Int\_BA = 0 at EC50

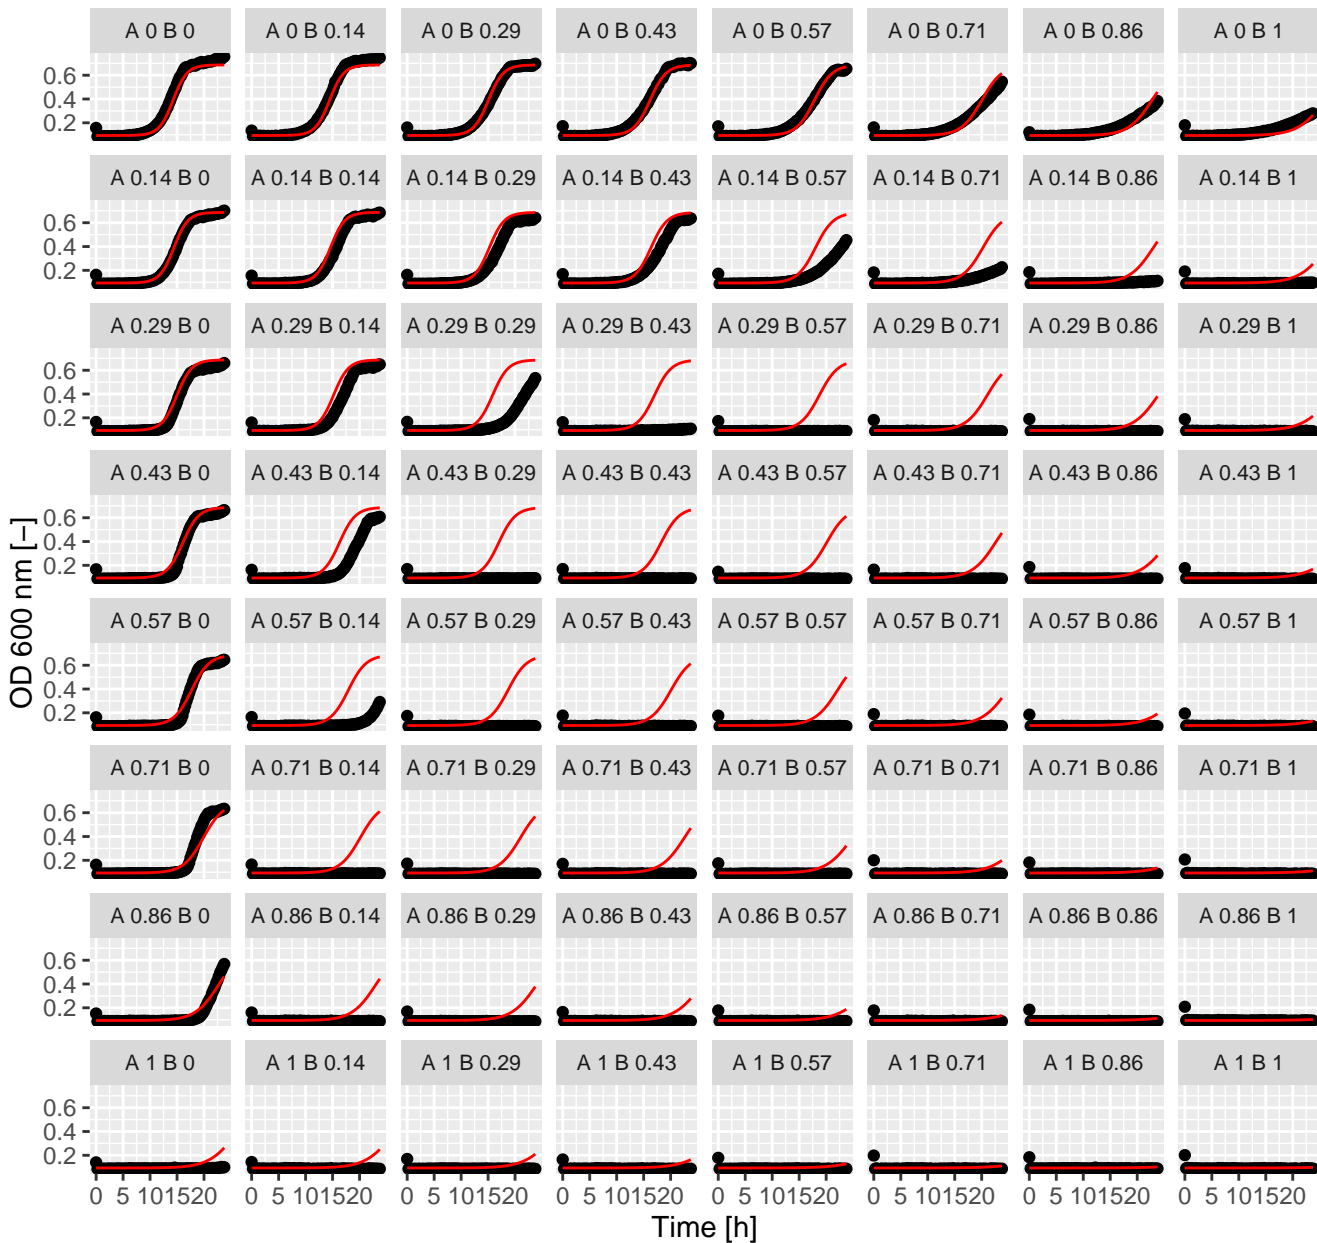

Dyc.Pen (= Ax.Bx) full GPDI  
Int\_AB = -0.84 and Int\_BA = -0.33 at EC50

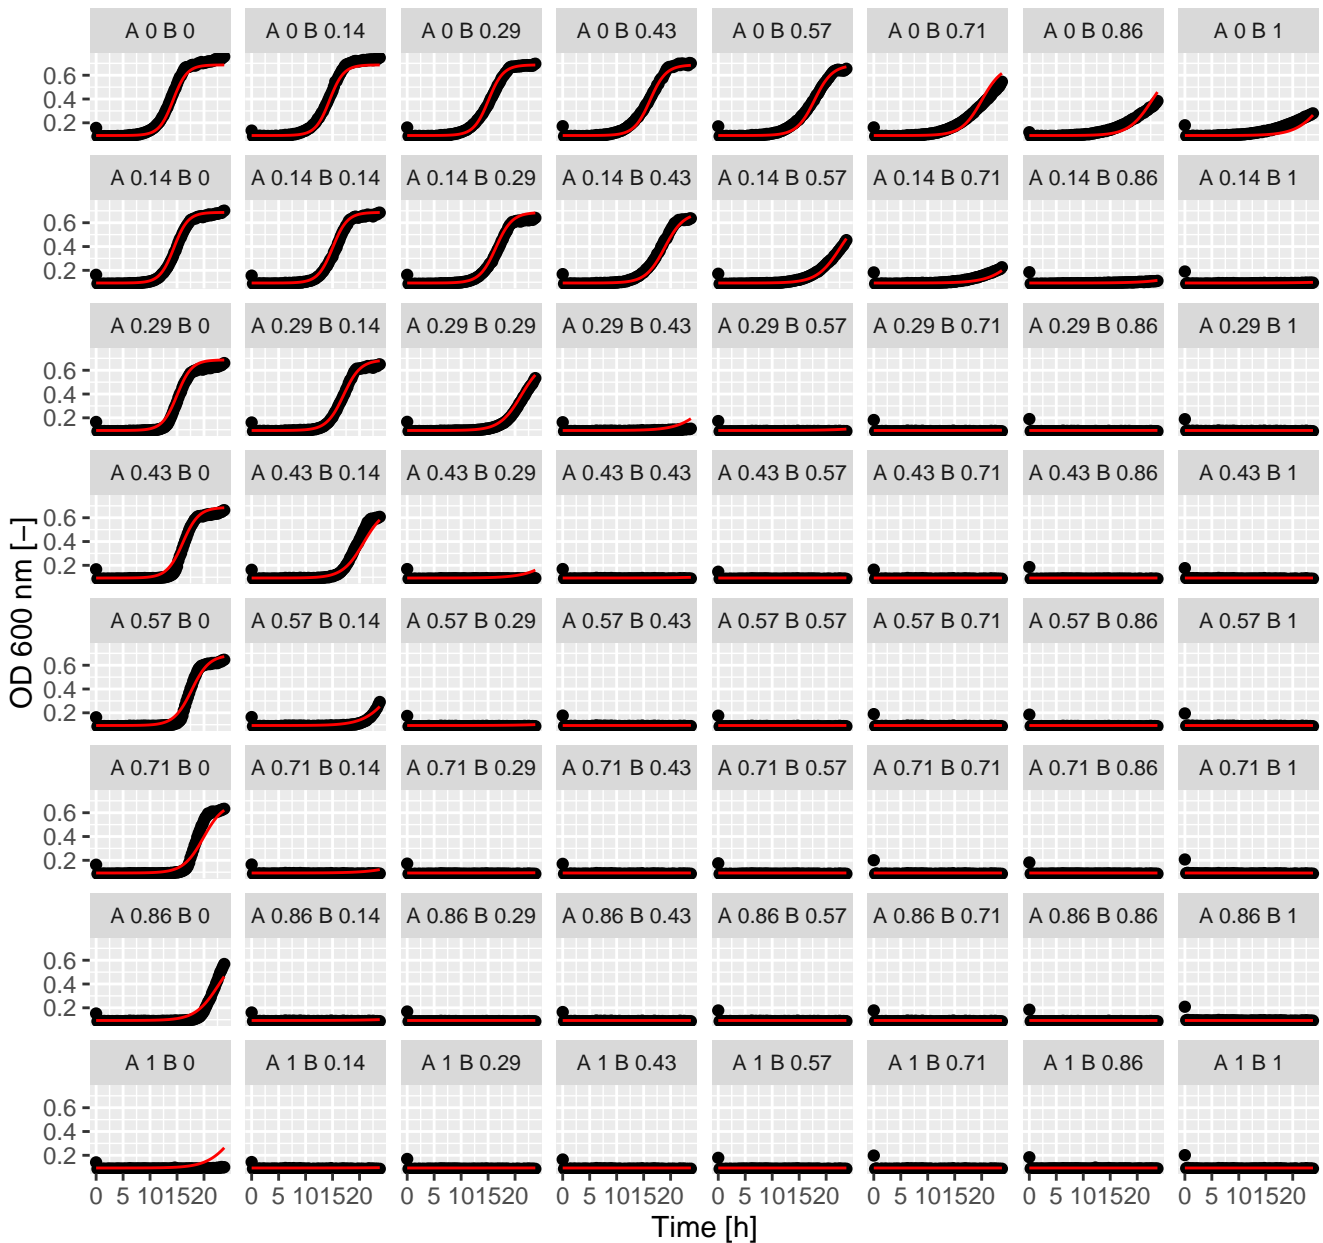

Dyc.Lat (= Ax.Bx) exp. additivity (BI)  
Int\_AB = 0 and Int\_BA = 0 at EC50

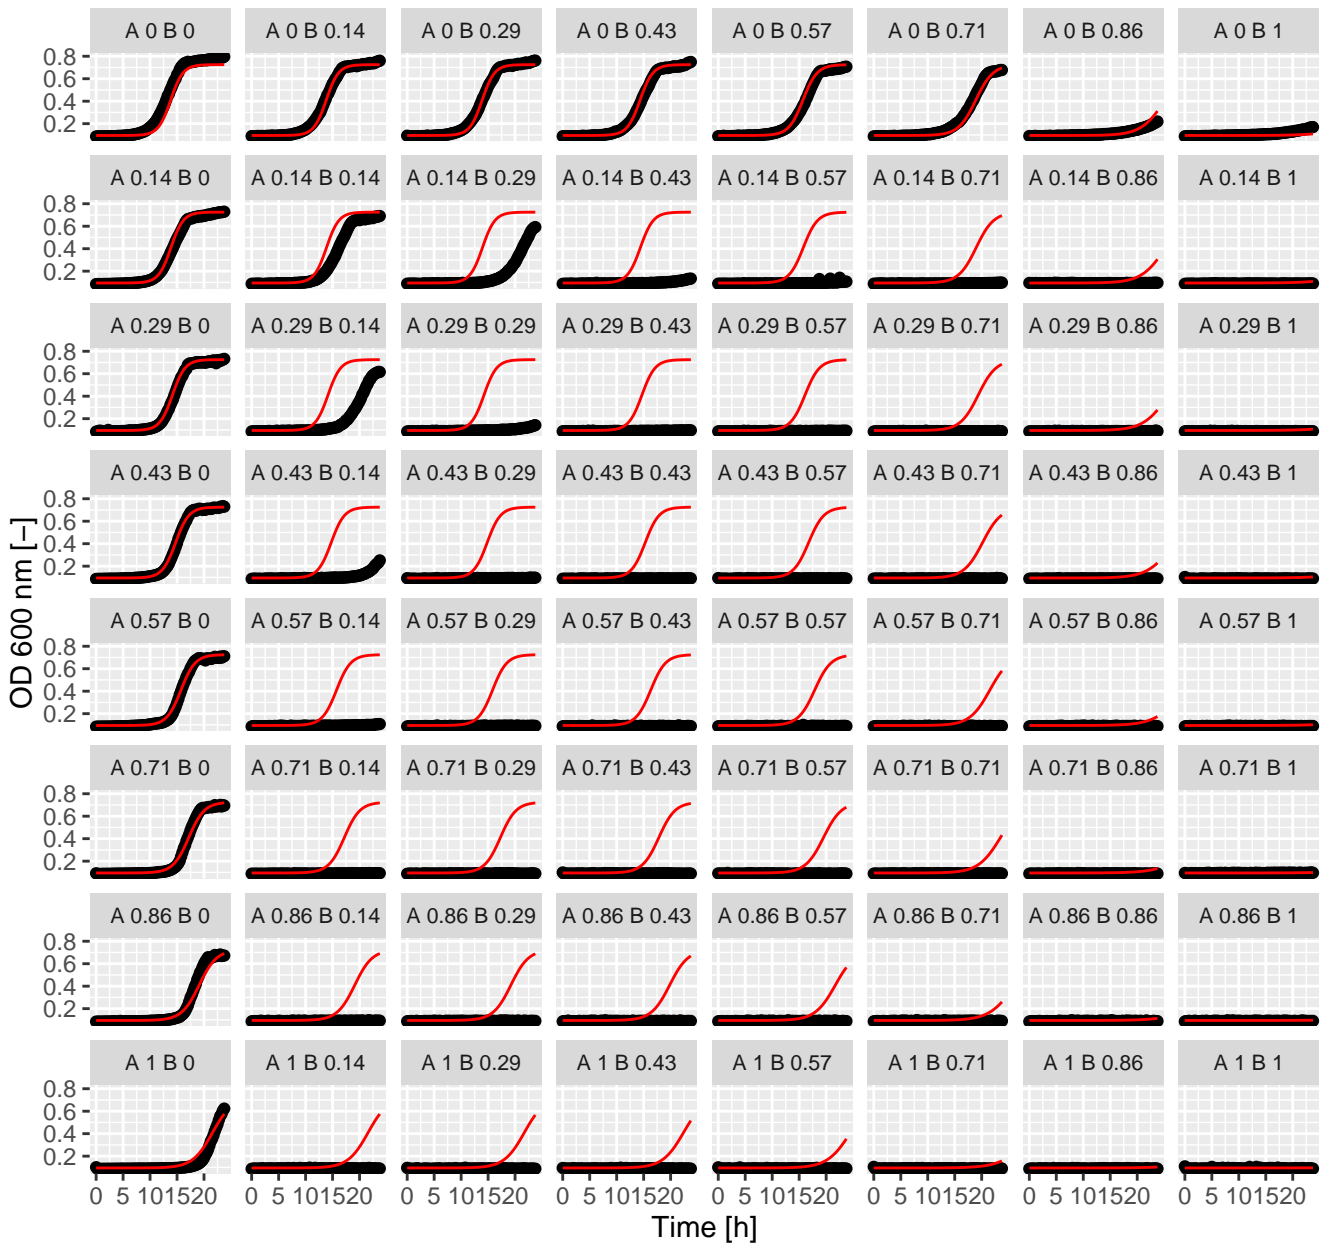

Dyc.Lat (= Ax.Bx) full GPDI  
 Int\_AB = -0.9 and Int\_BA = -0.56 at EC50

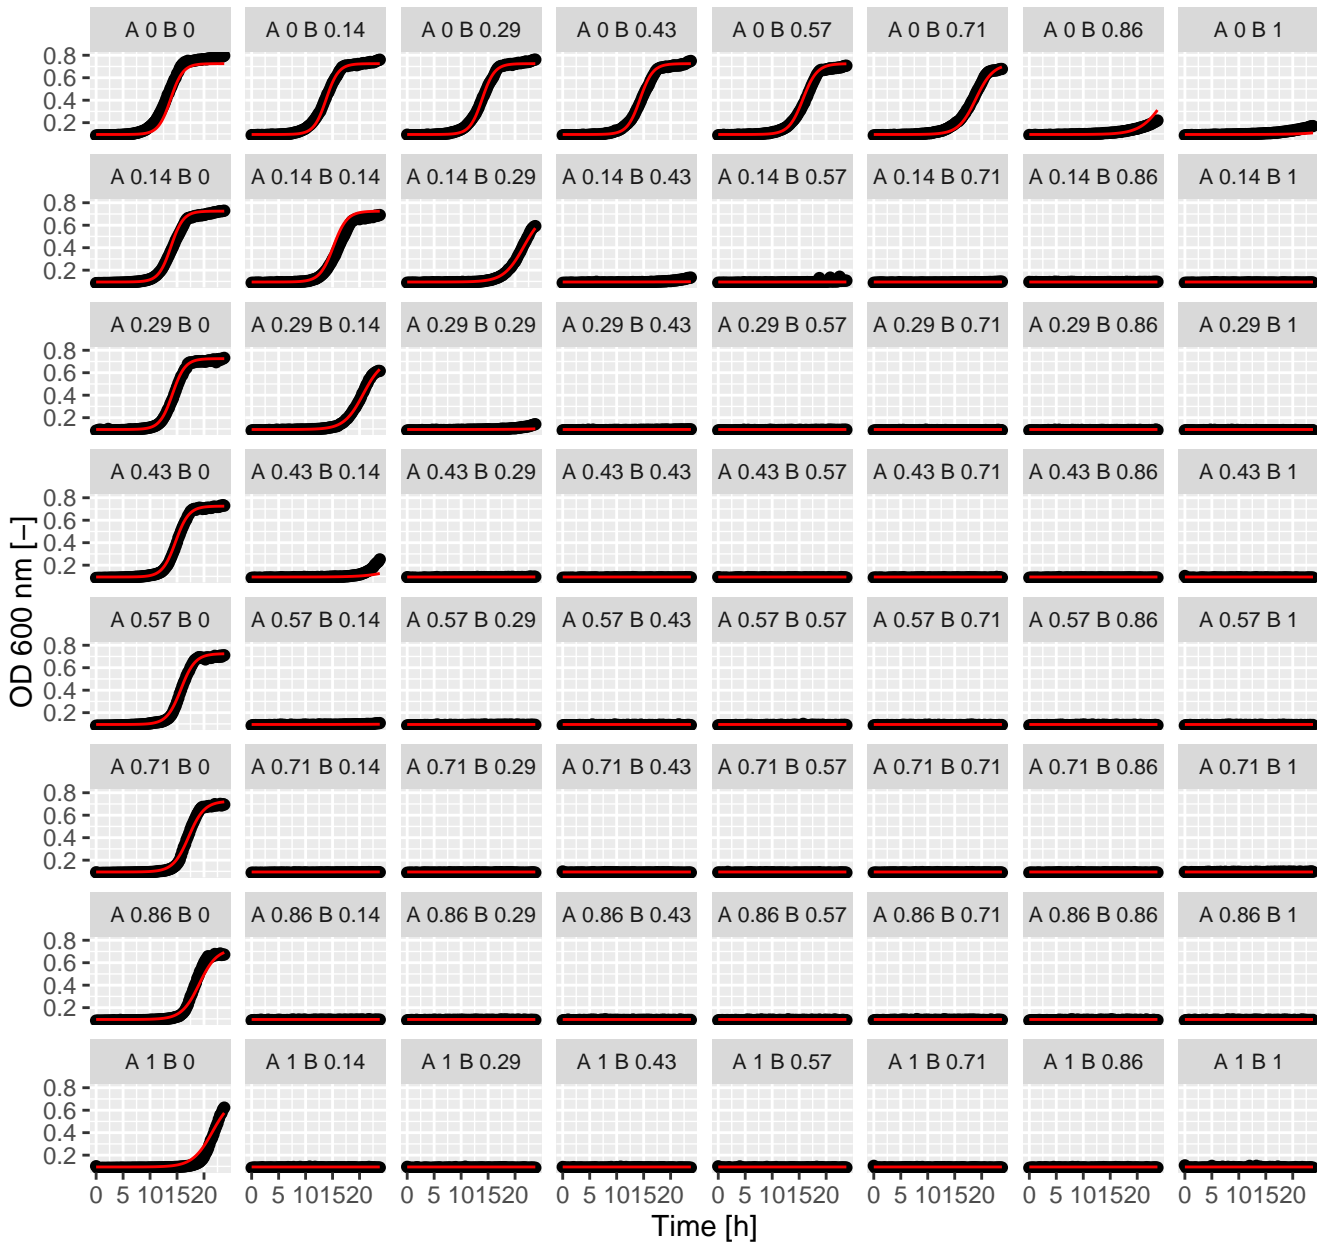



Dyc.Hal (= Ax.Bx) exp. additivity (BI)  
Int\_AB = 0 and Int\_BA = 0 at EC50

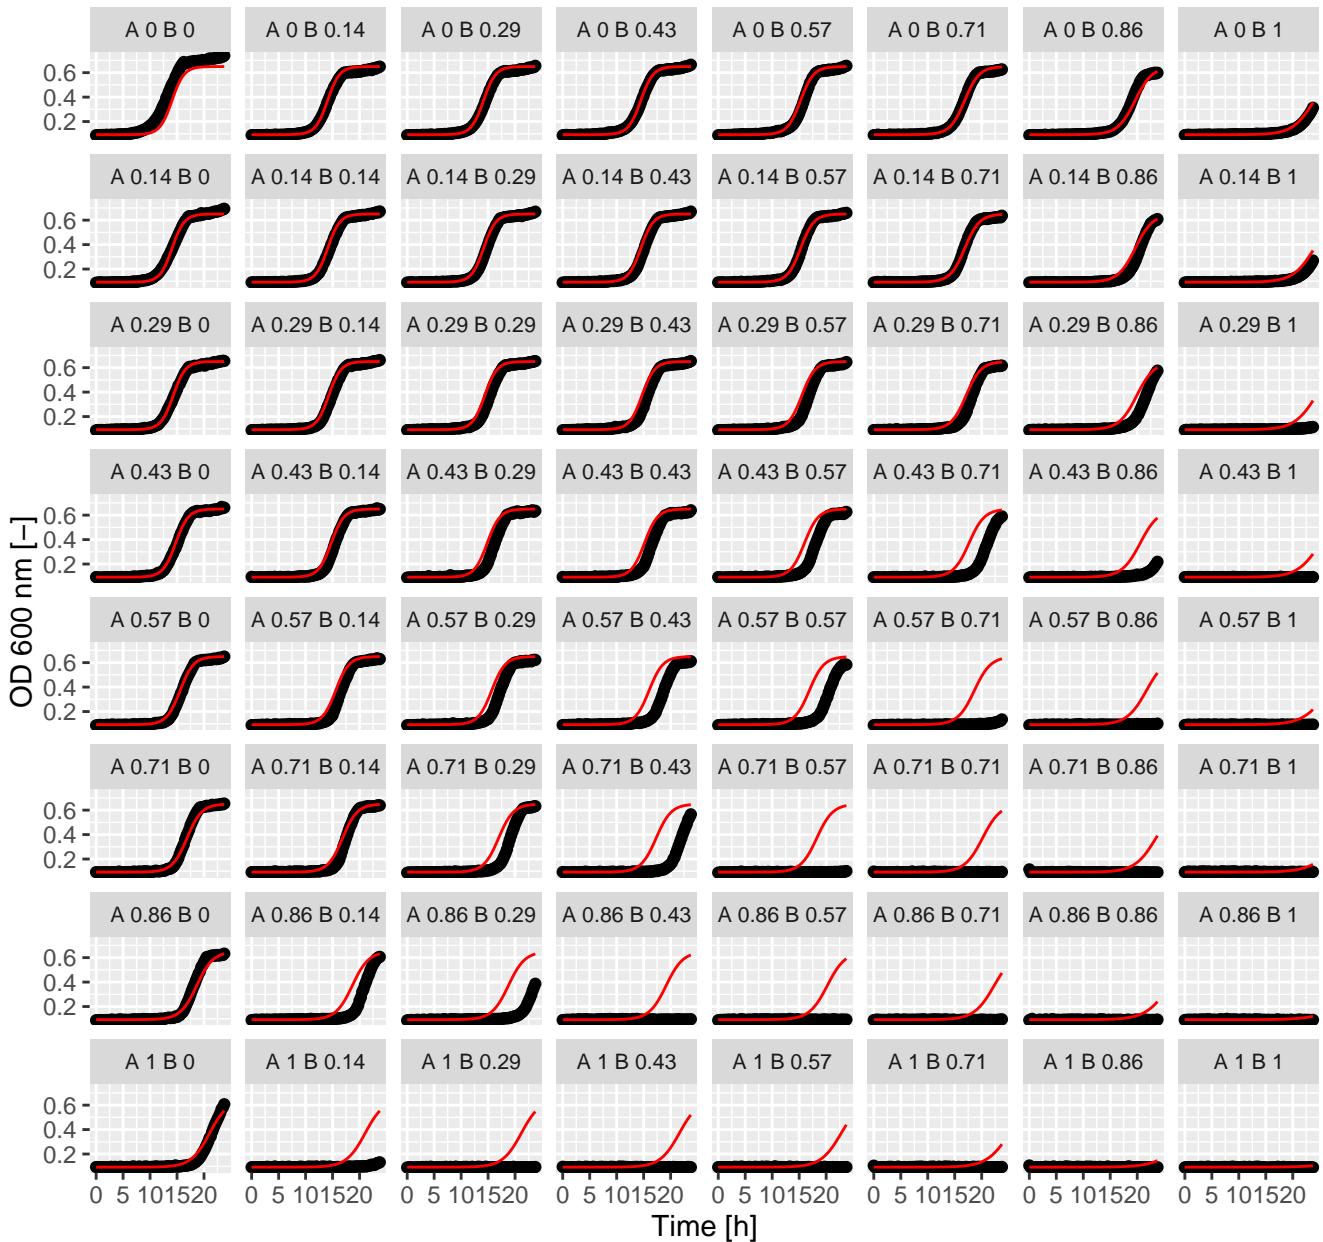

Dyc.Hal (= Ax.Bx) full GPDI  
 Int\_AB = -0.48 and Int\_BA = -0.17 at EC50

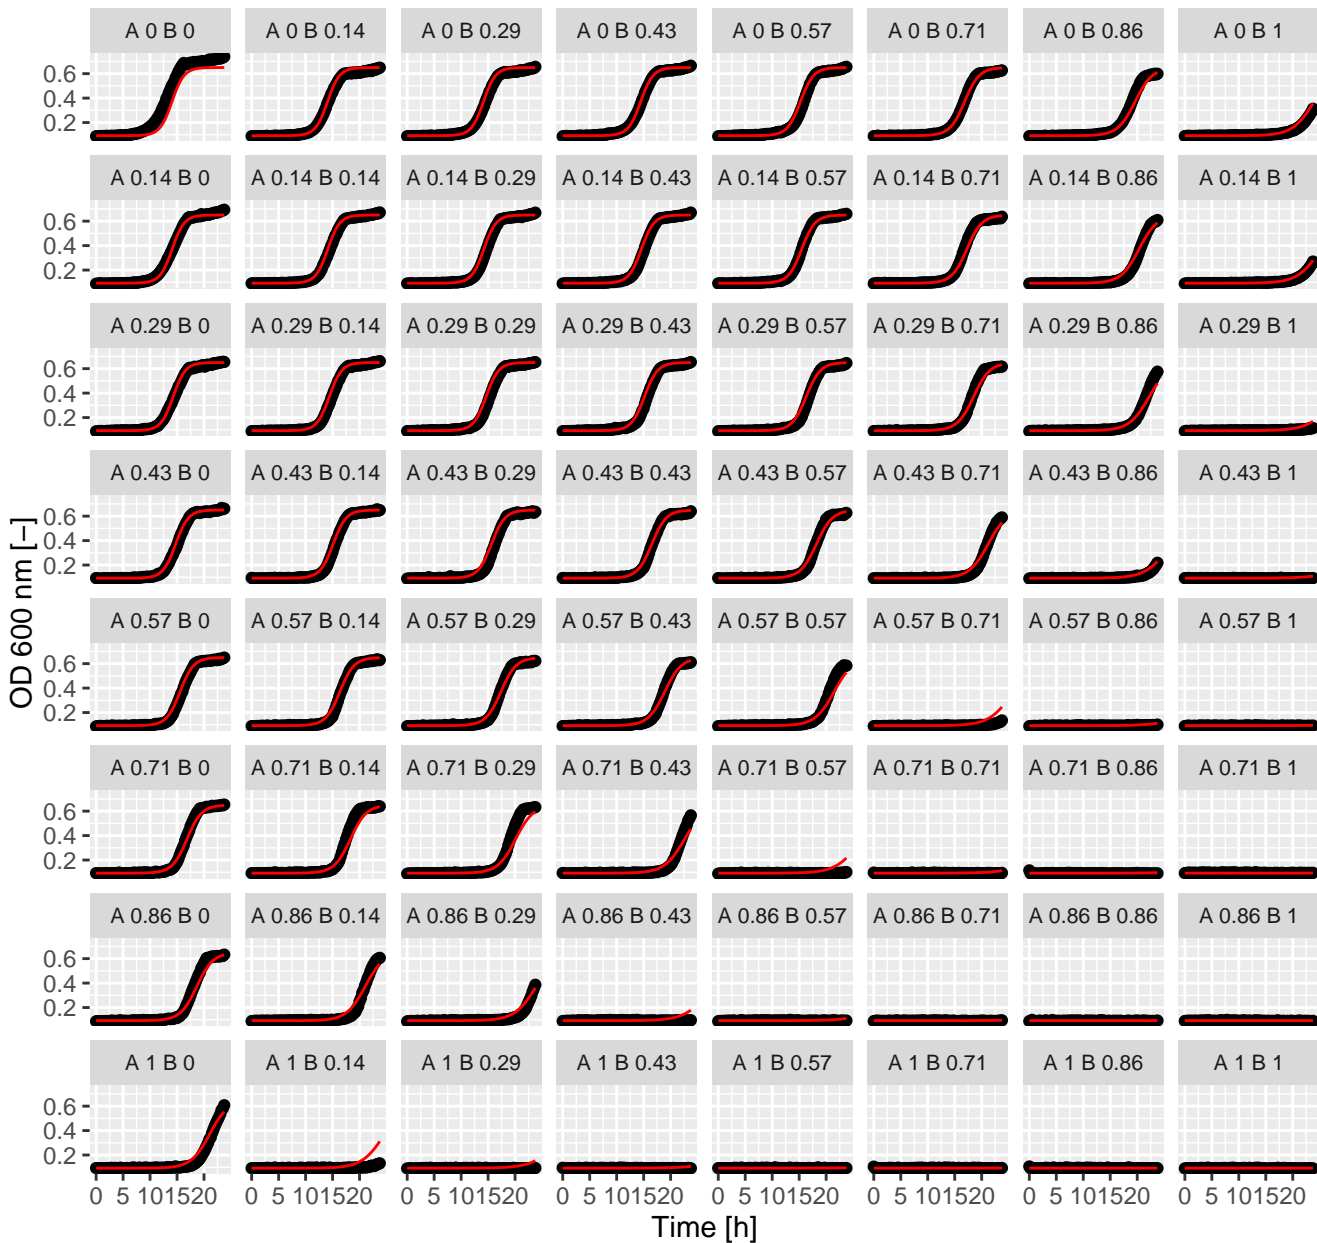

Dyc.Fen (= Ax.Bx) exp. additivity (BI)  
 Int\_AB = 0 and Int\_BA = 0 at EC50

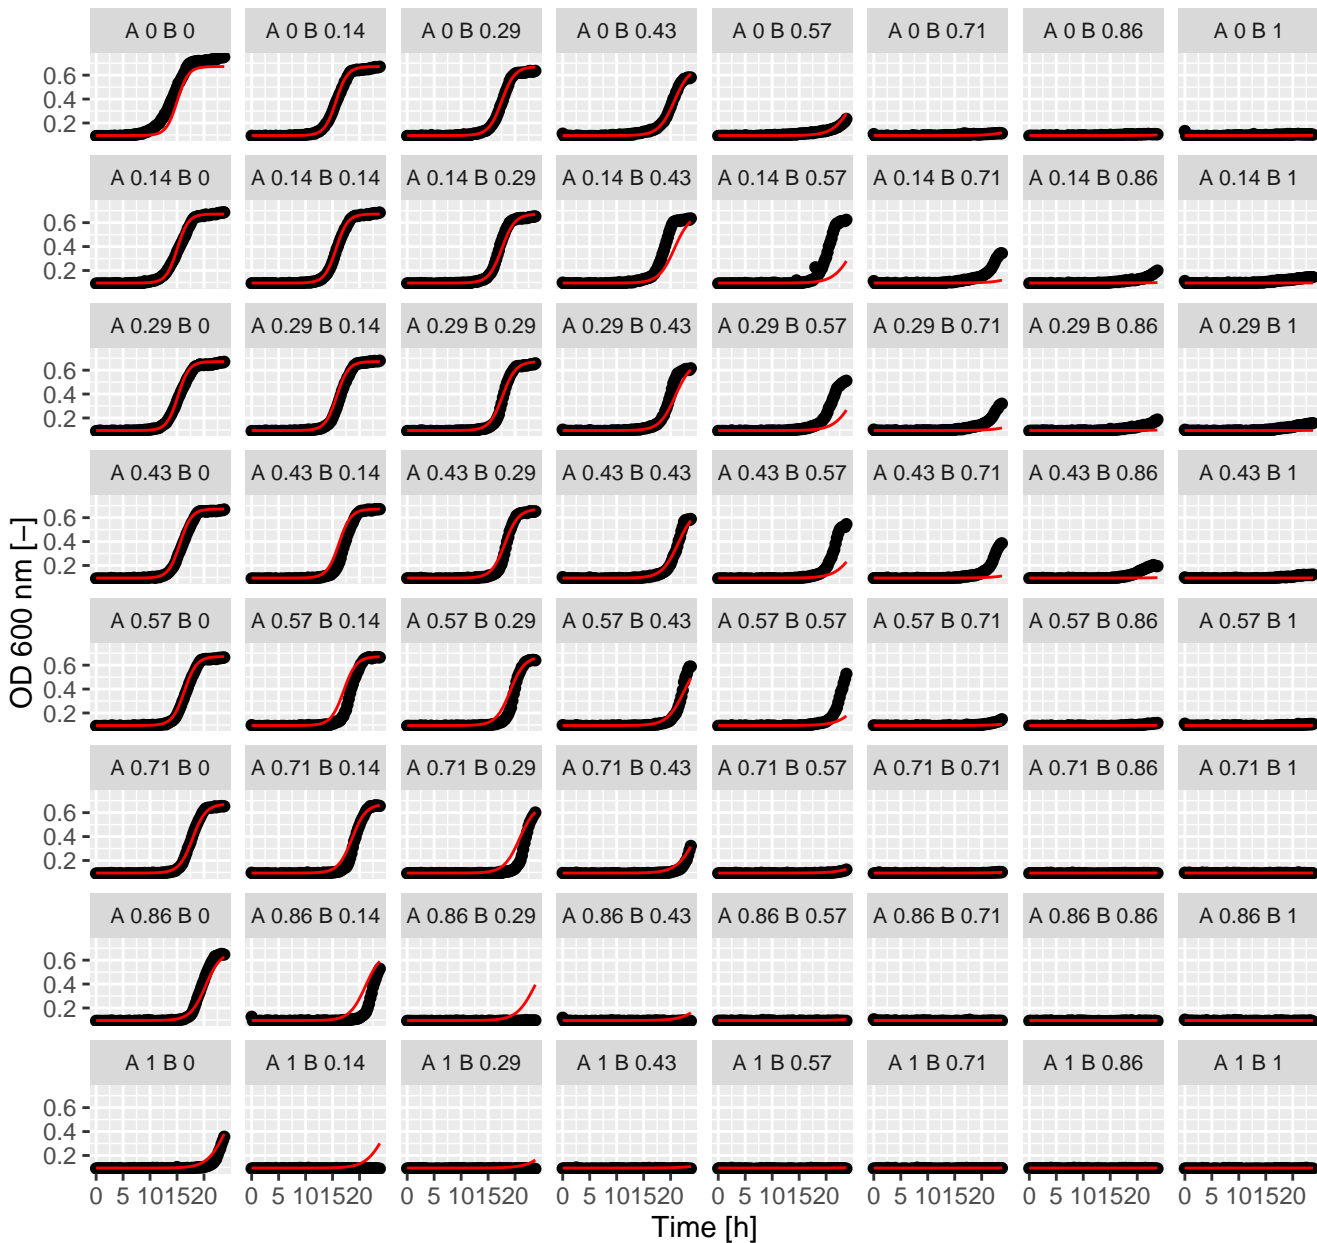

Dyc.Fen (= Ax.Bx) full GPDI  
 Int\_AB = -0.24 and Int\_BA = 0.29 at EC50

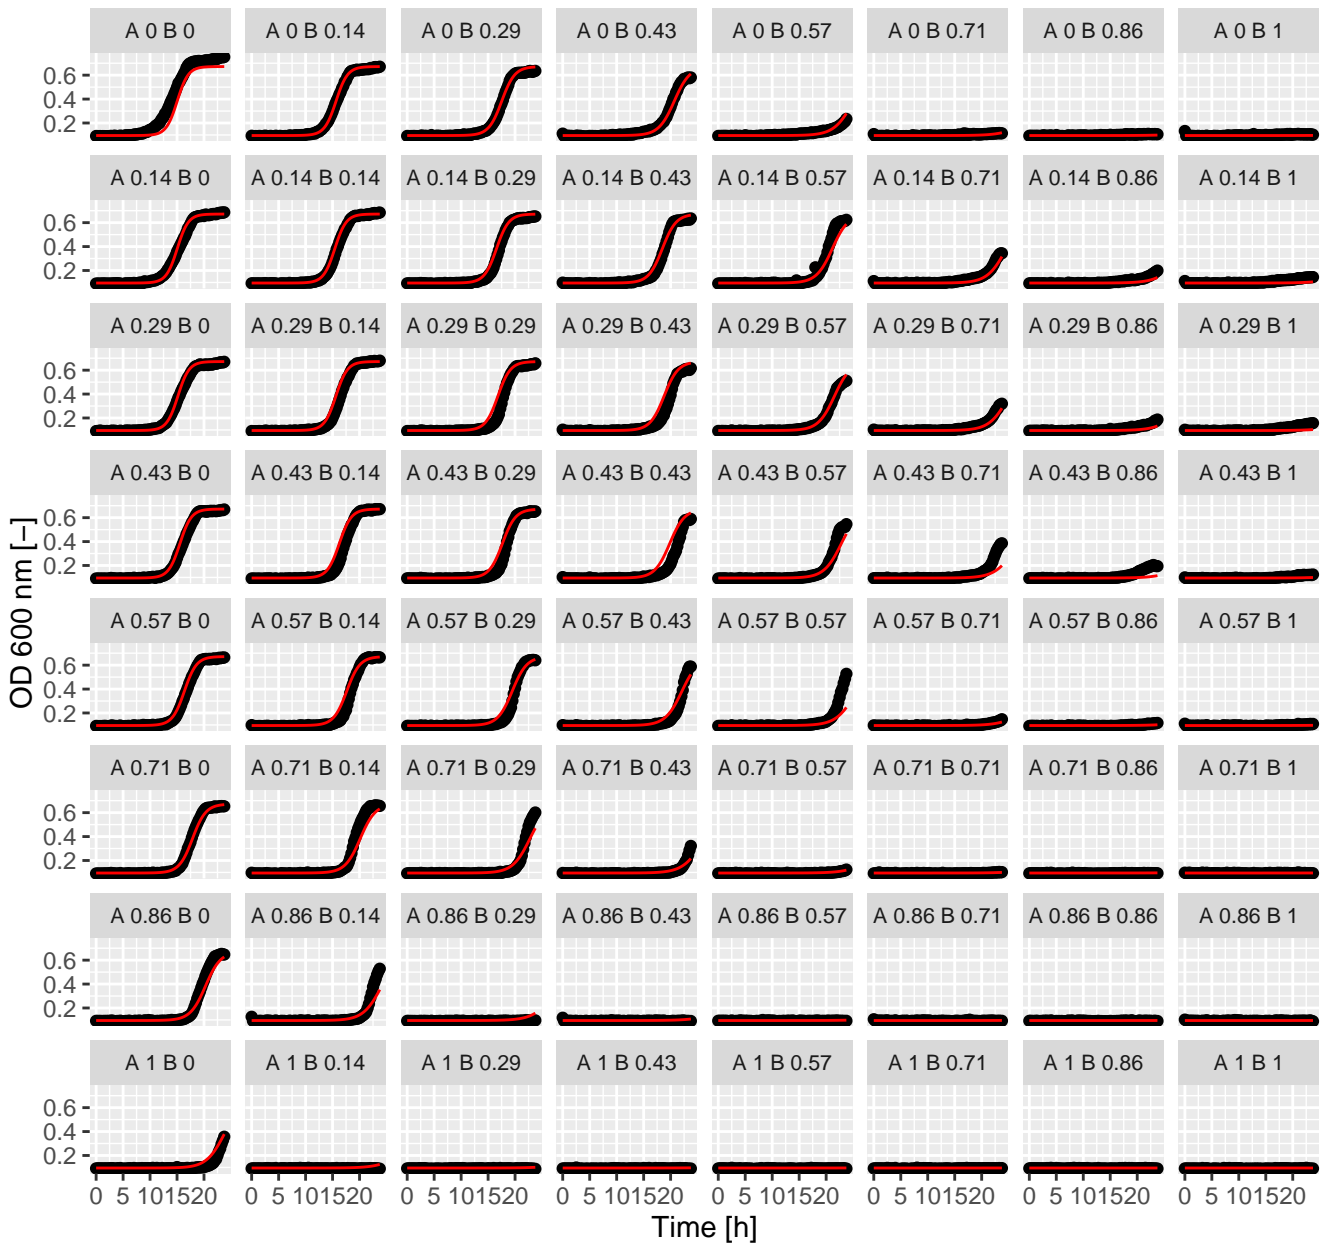

Dyc.Dyc (= Ax.Bx) exp. additivity (BI)  
Int\_AB = 0 and Int\_BA = 0 at EC50

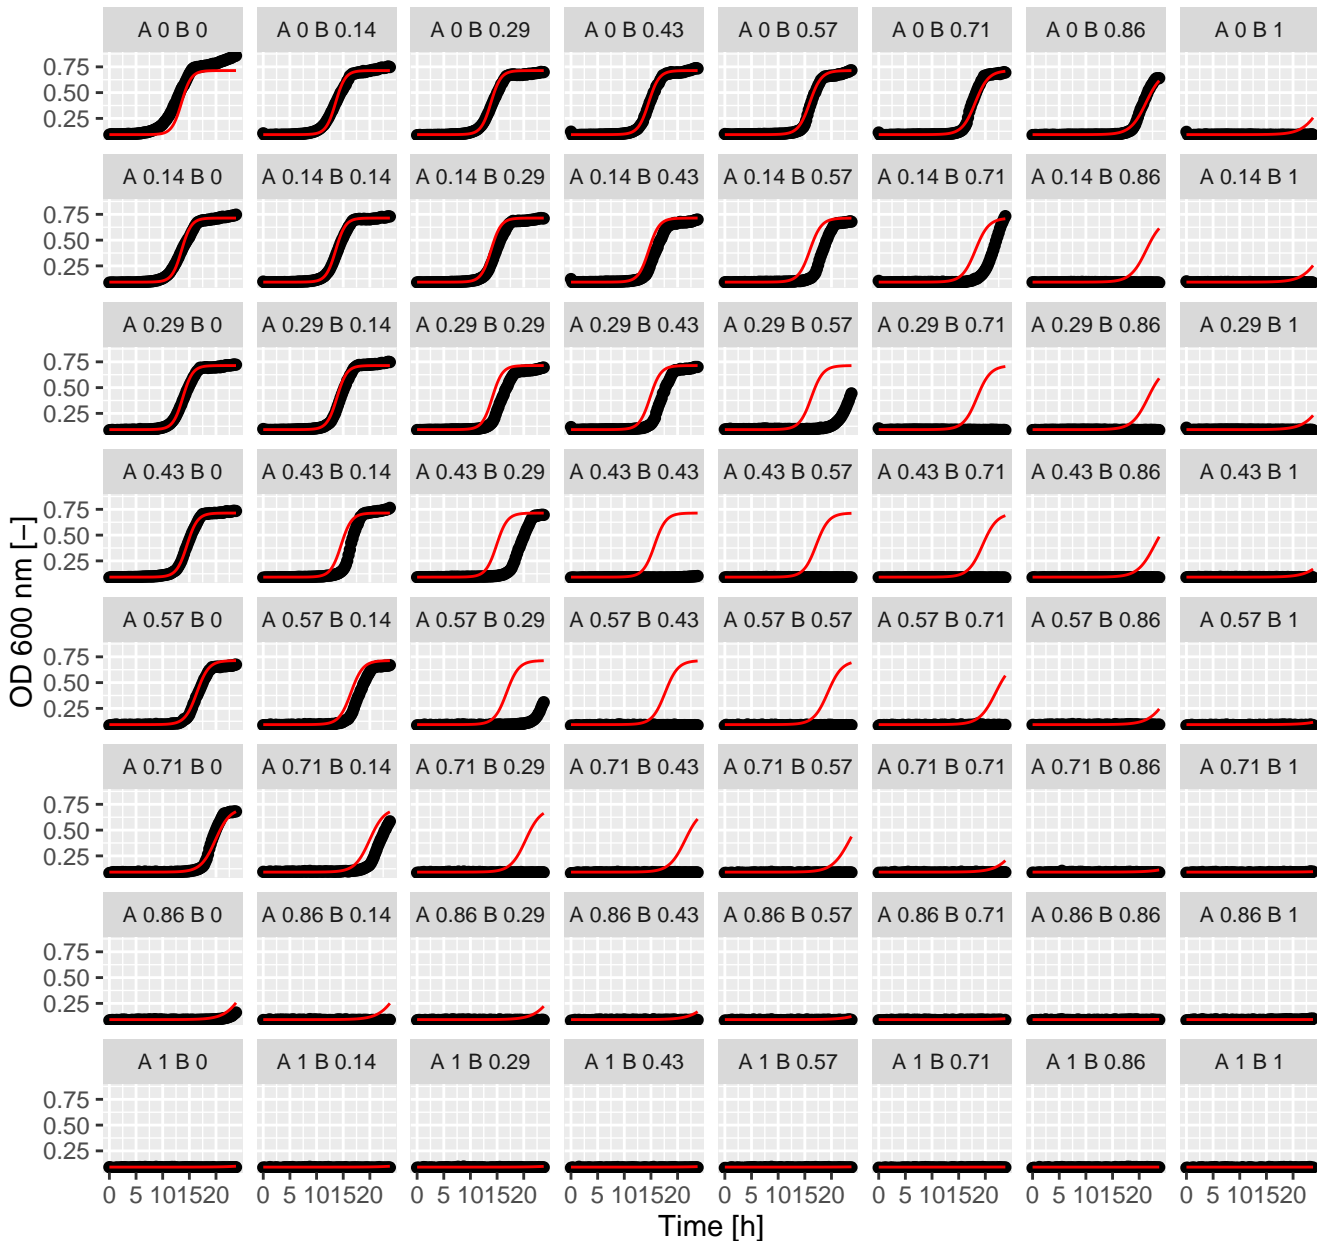

Dyc.Dyc (= Ax.Bx) full GPDI  
 Int\_AB = -0.55 and Int\_BA = -0.59 at EC50

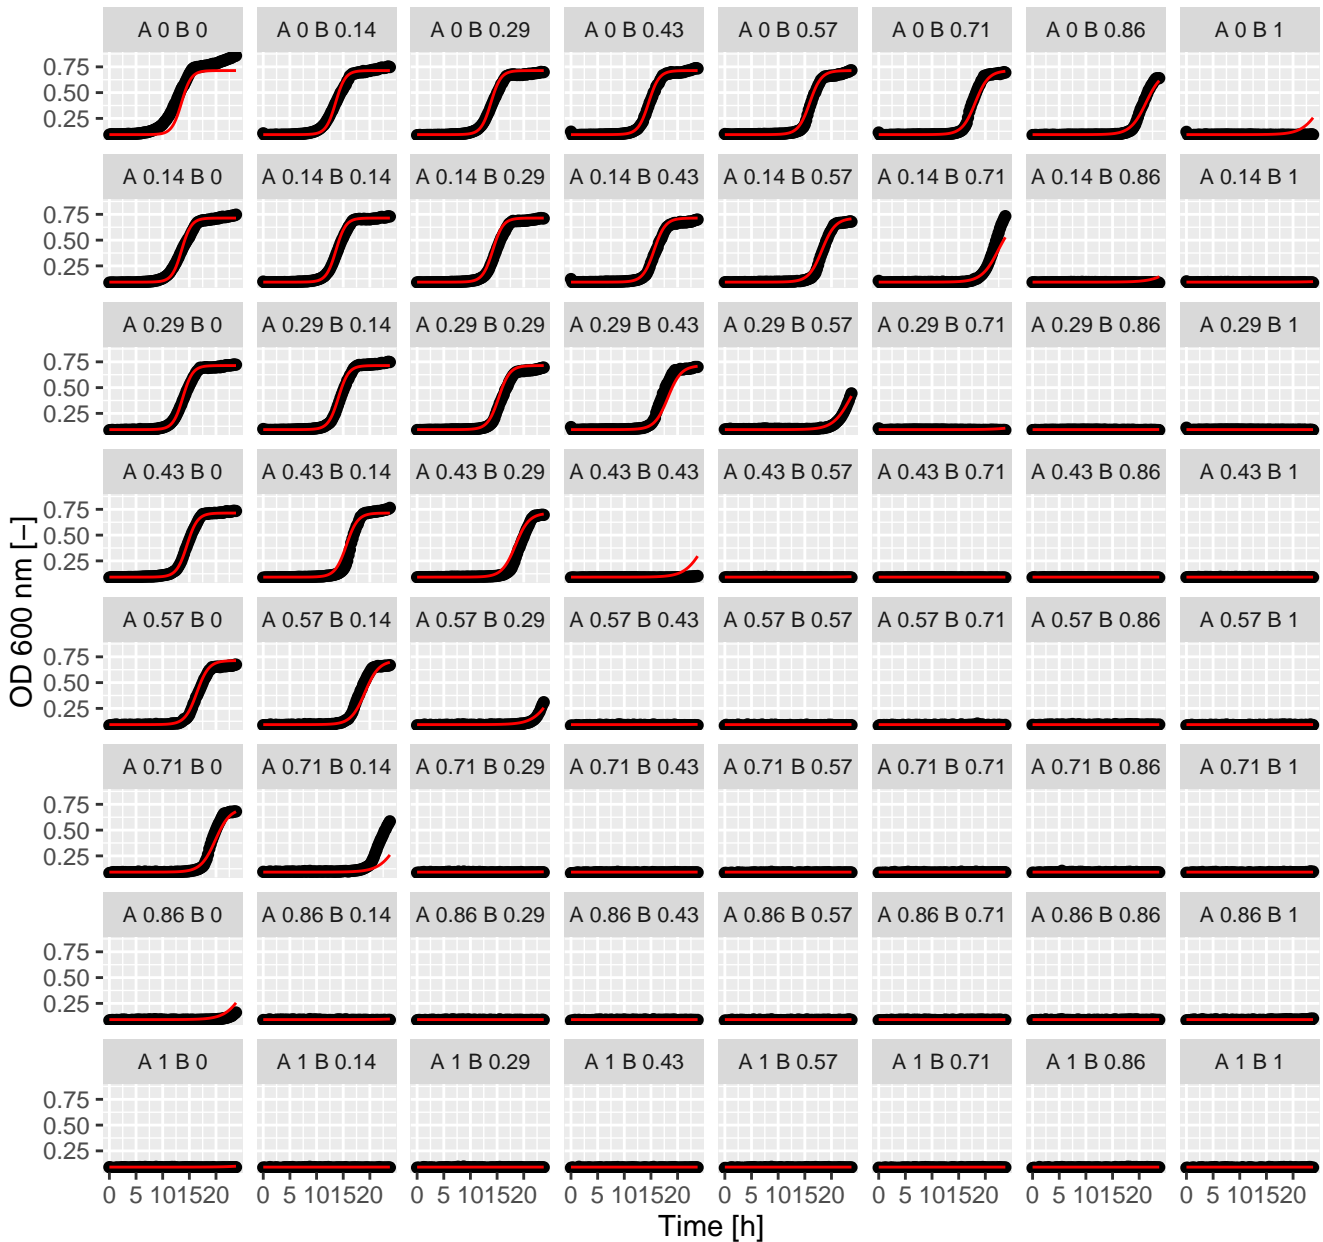

Cyc.Ter (= Ax.Bx) exp. additivity (BI)  
Int\_AB = 0 and Int\_BA = 0 at EC50

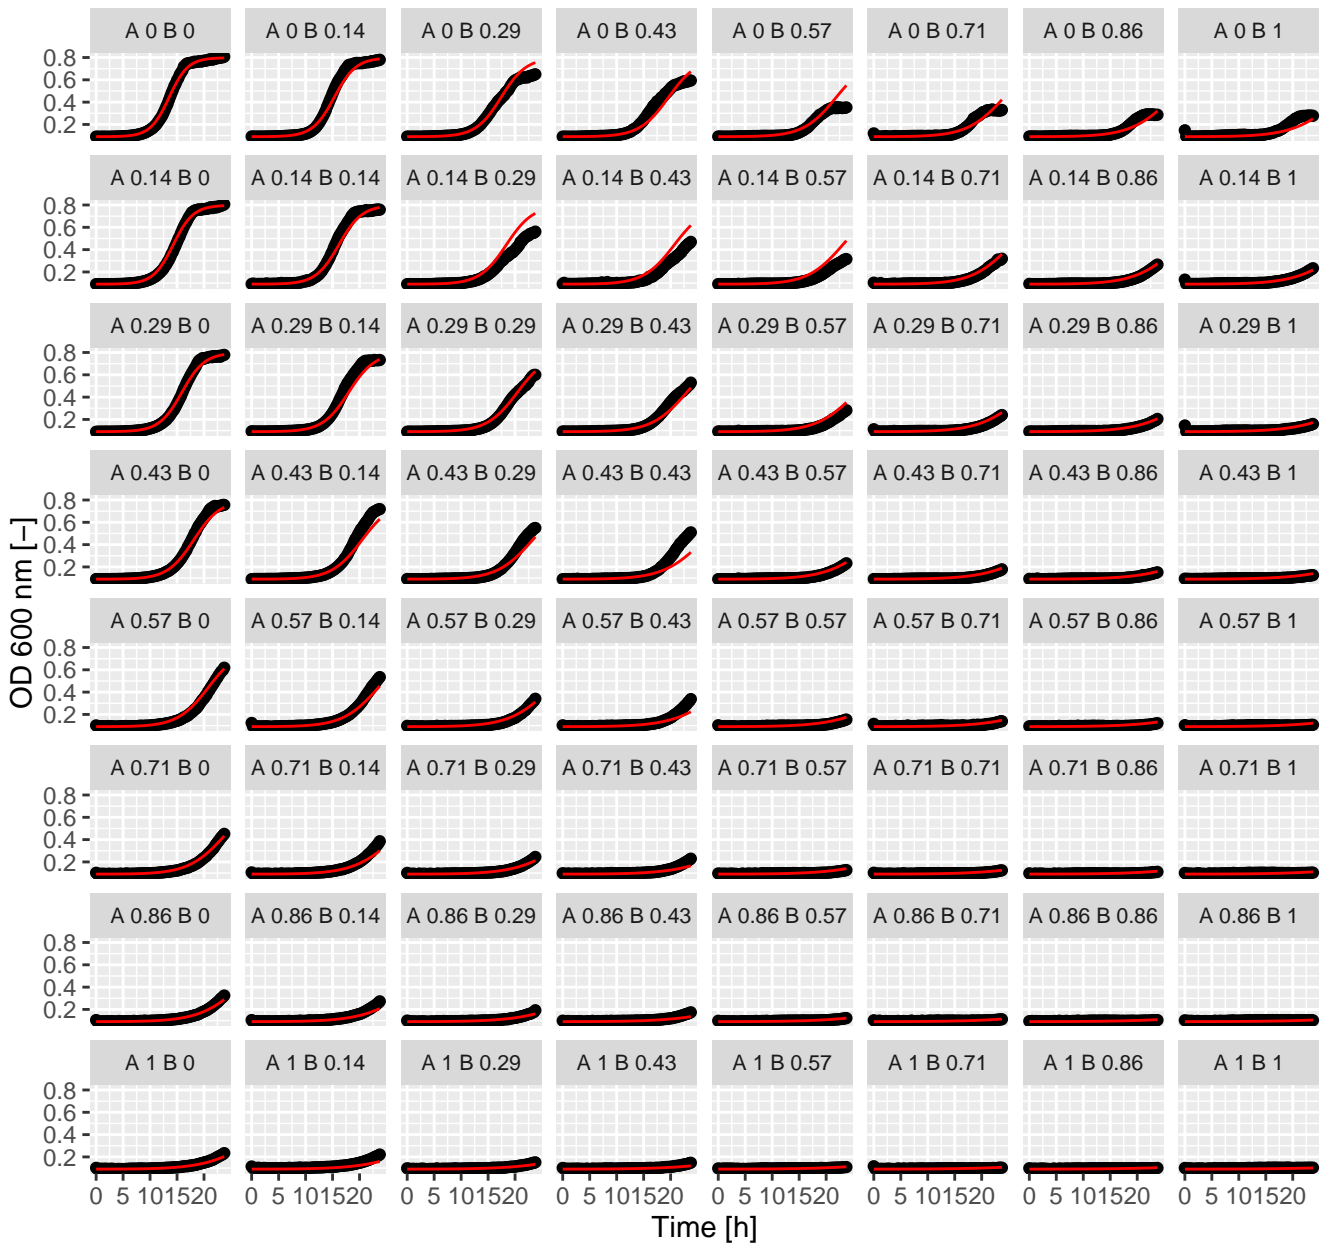

Cyc.Ter (= Ax.Bx) full GPDI  
Int\_AB = 0.35 and Int\_BA = -0.2 at EC50

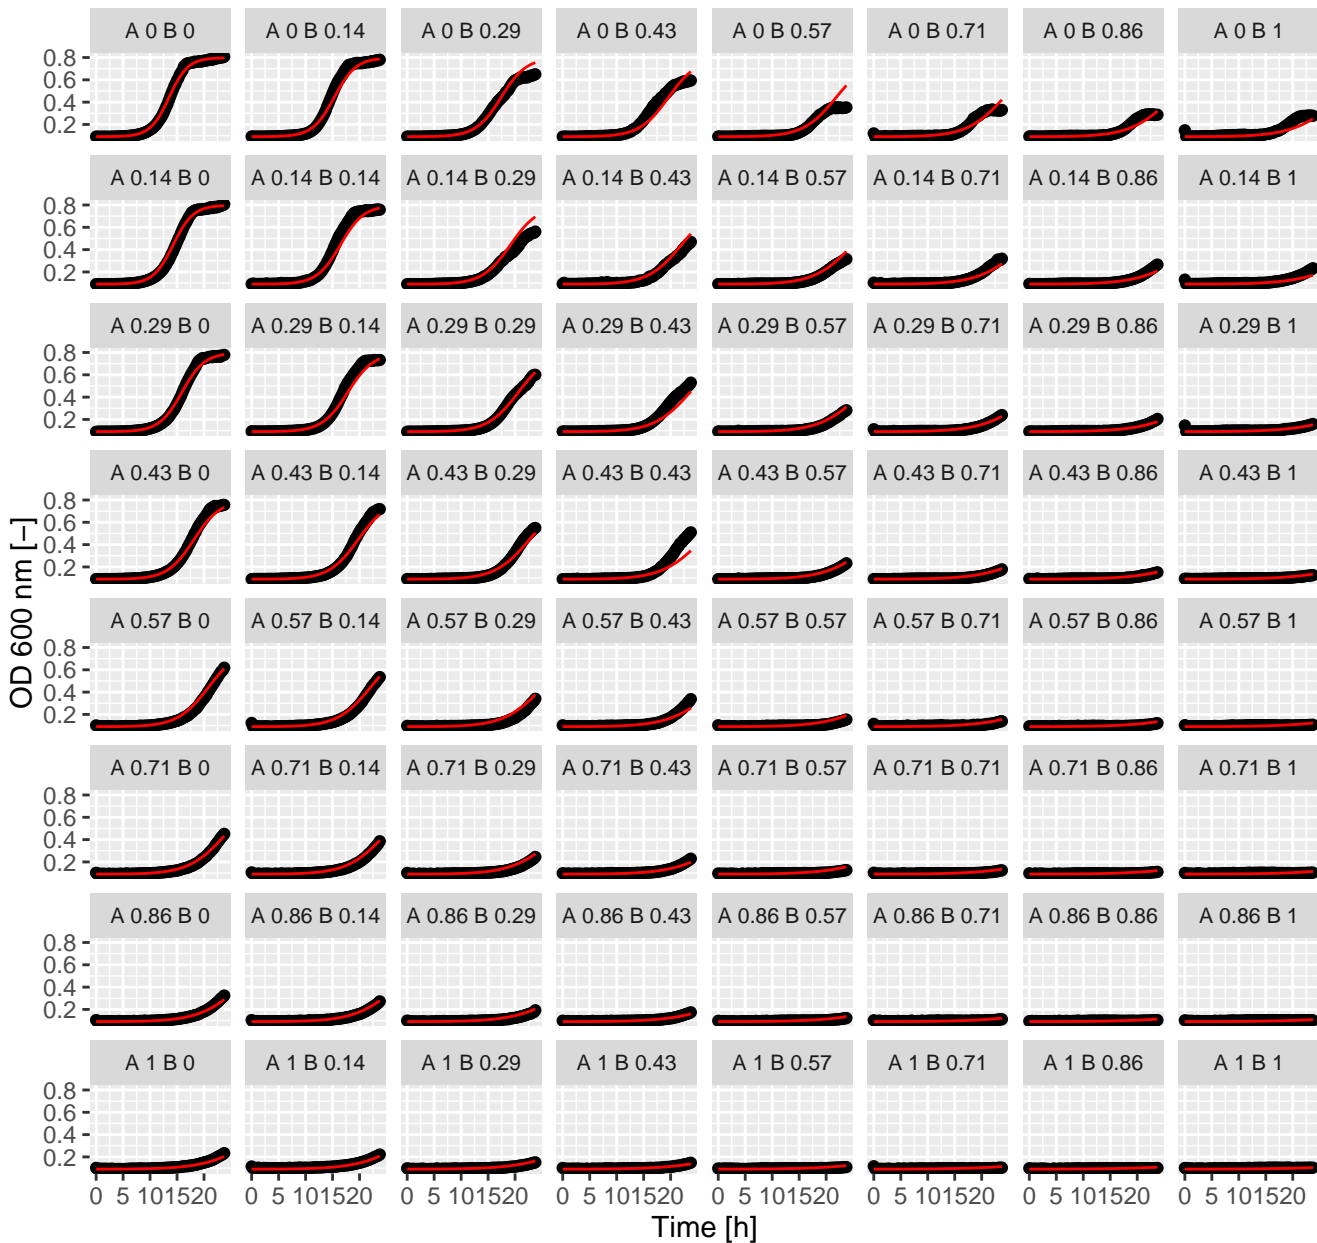



Cyc.Tac (= Ax.Bx) exp. additivity (BI)  
Int\_AB = 0 and Int\_BA = 0 at EC50

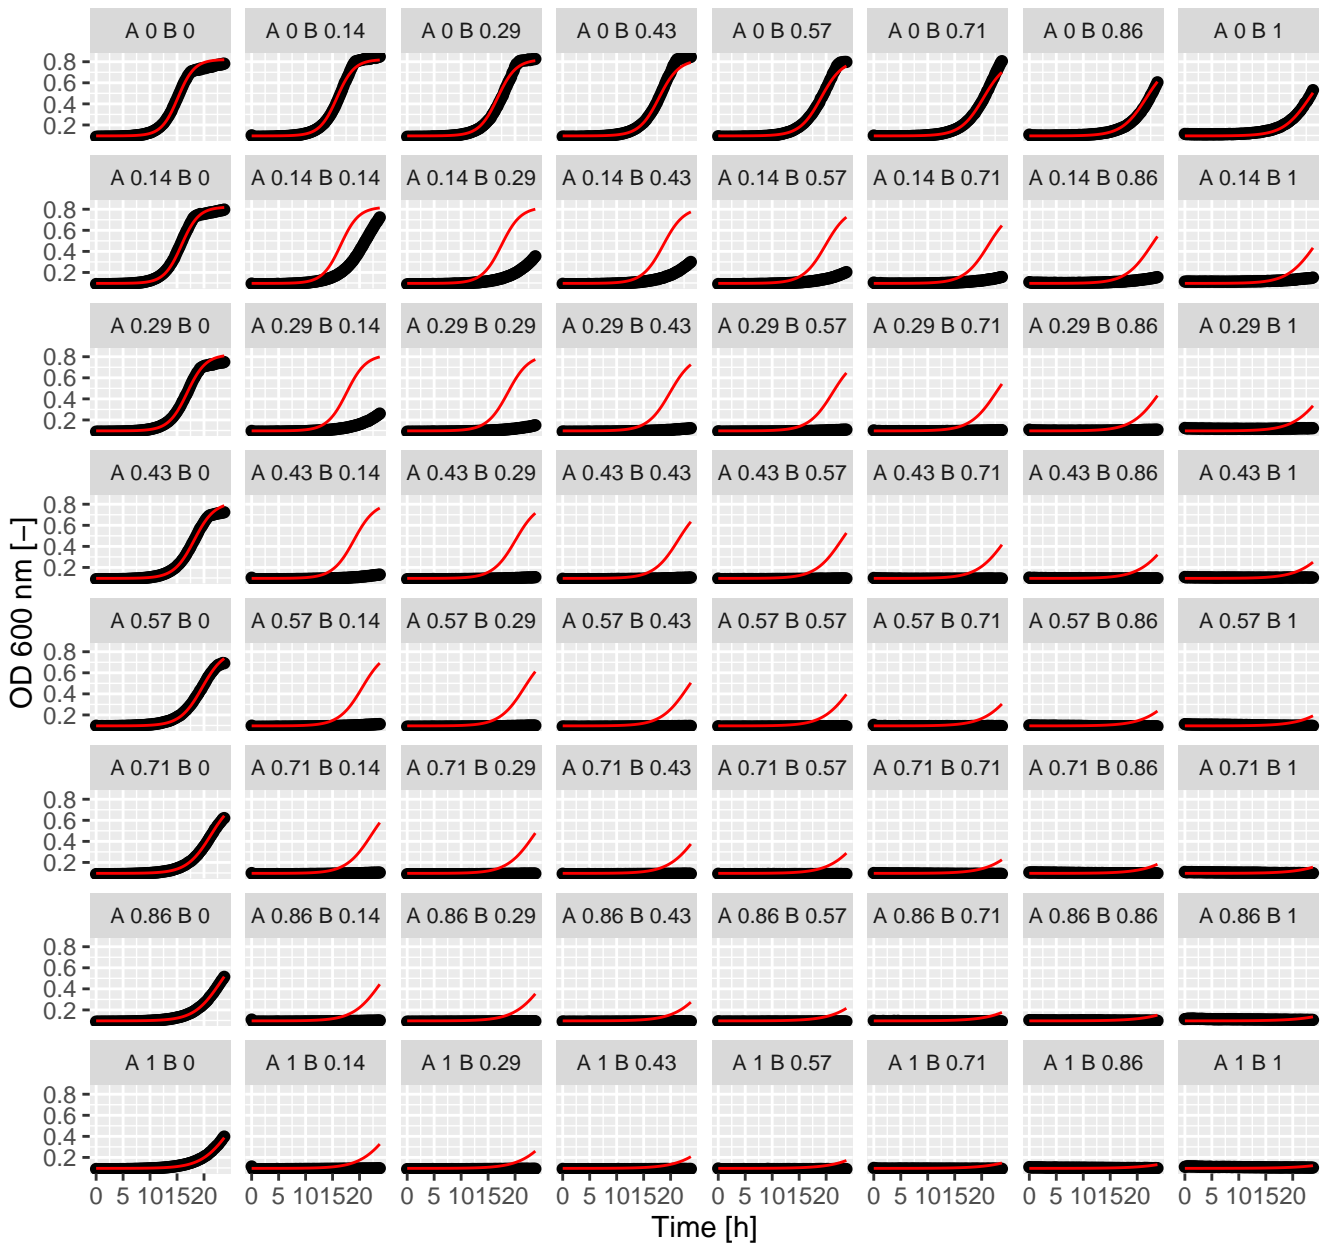

Cyc.Tac (= Ax.Bx) full GPDI  
 Int\_AB = -0.92 and Int\_BA = 275.35 at EC50

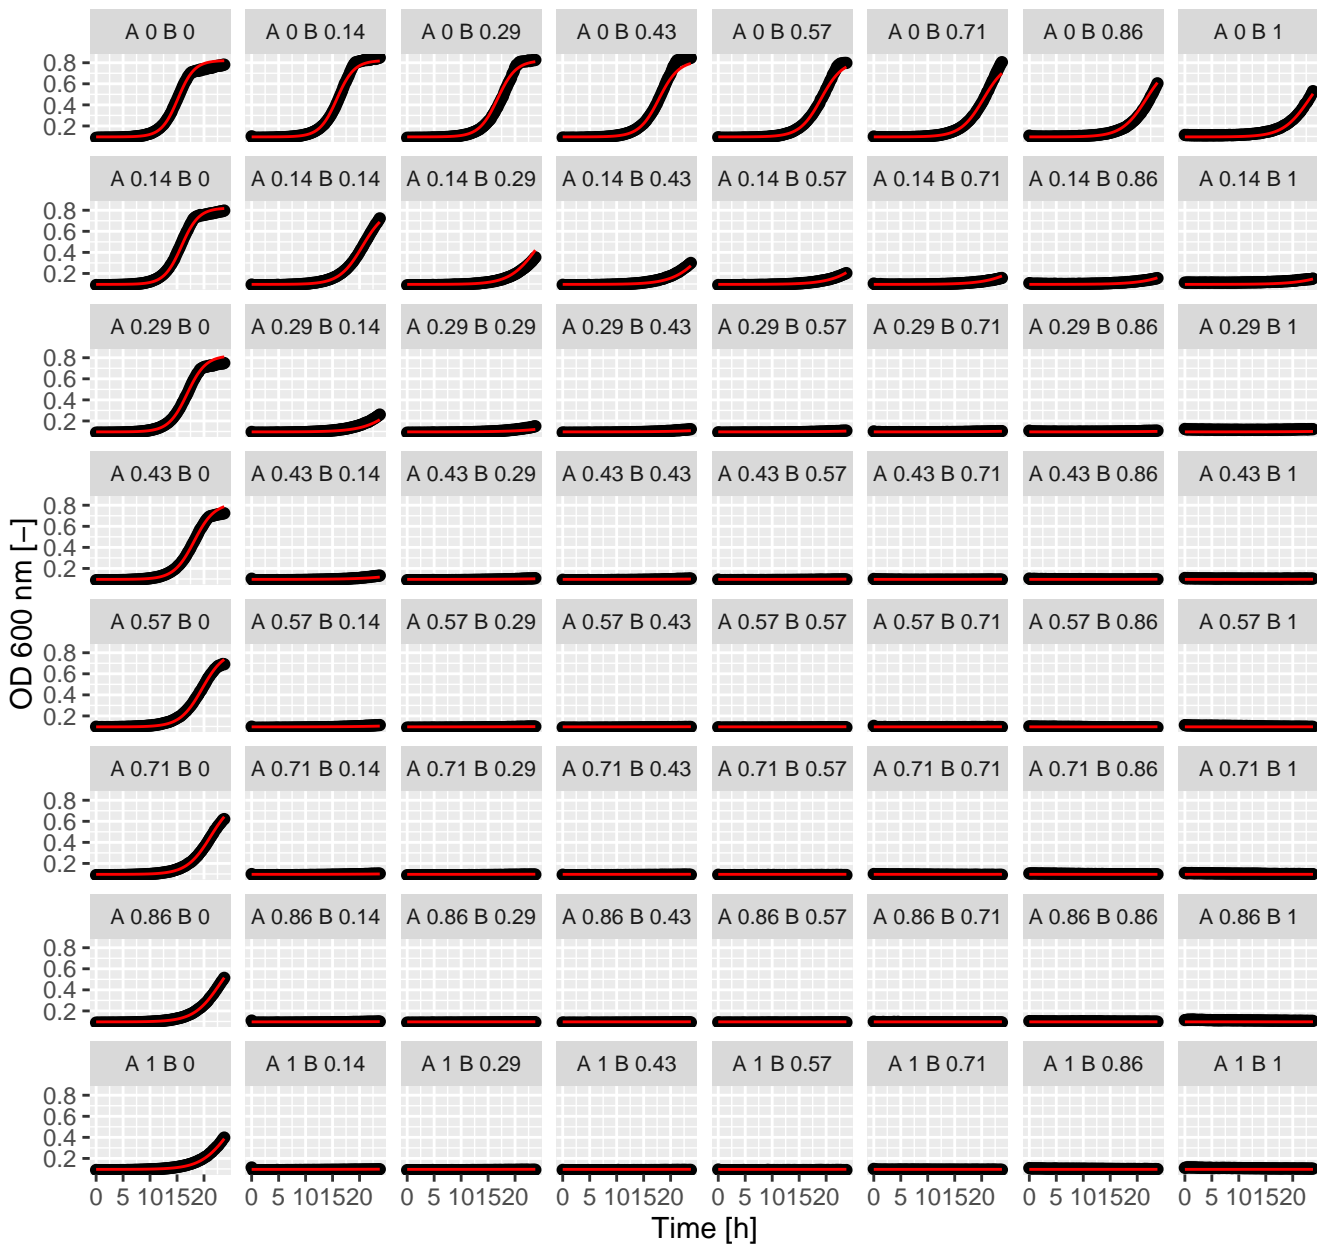

Cyc.Sta (= Ax.Bx) exp. additivity (BI)  
Int\_AB = 0 and Int\_BA = 0 at EC50

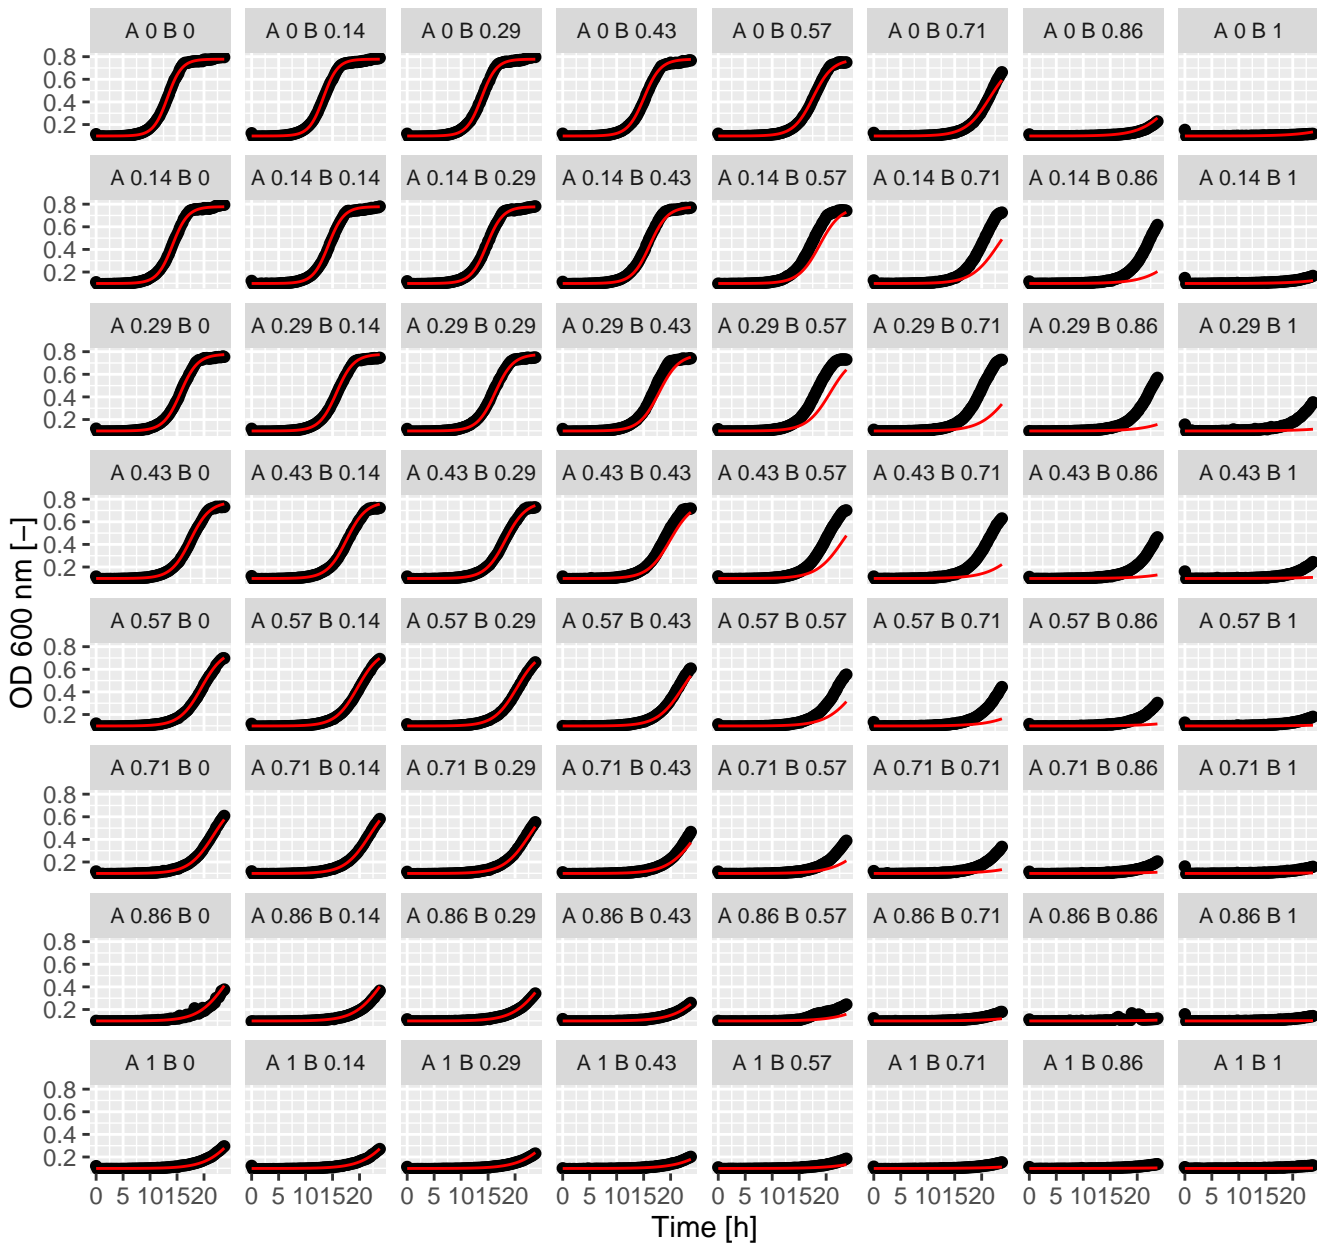

Cyc.Sta (= Ax.Bx) full GPDI  
Int\_AB = -0.17 and Int\_BA = 1 at EC50

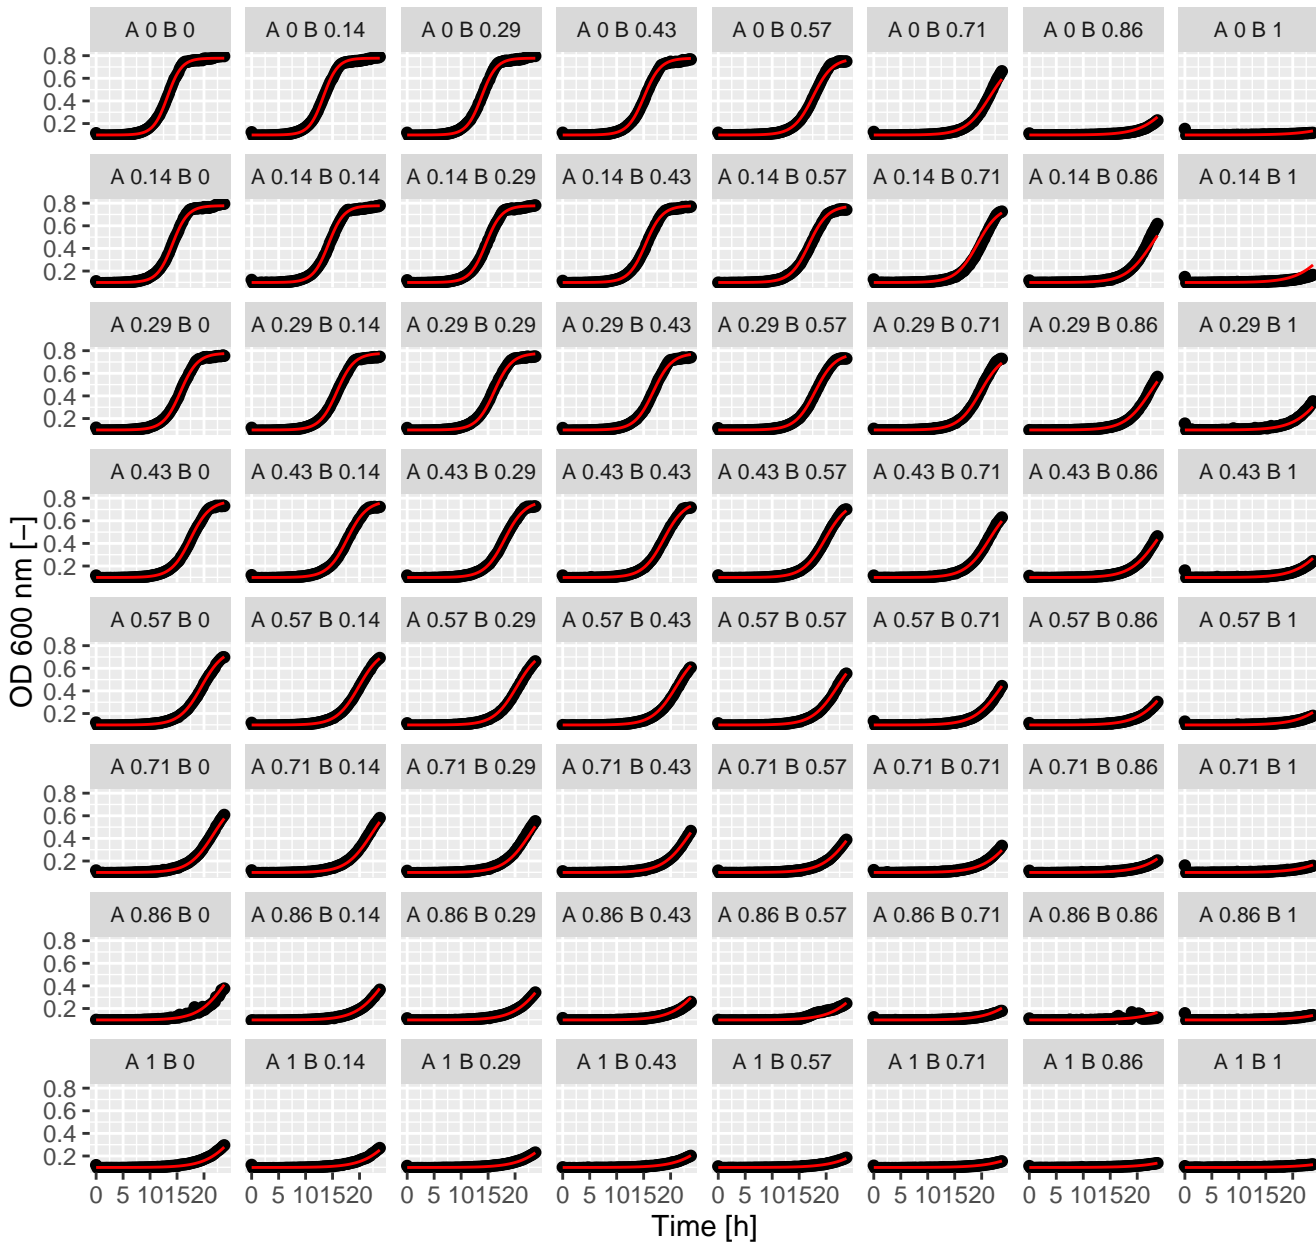

Cyc.Rad (= Ax.Bx) exp. additivity (BI)  
Int\_AB = 0 and Int\_BA = 0 at EC50

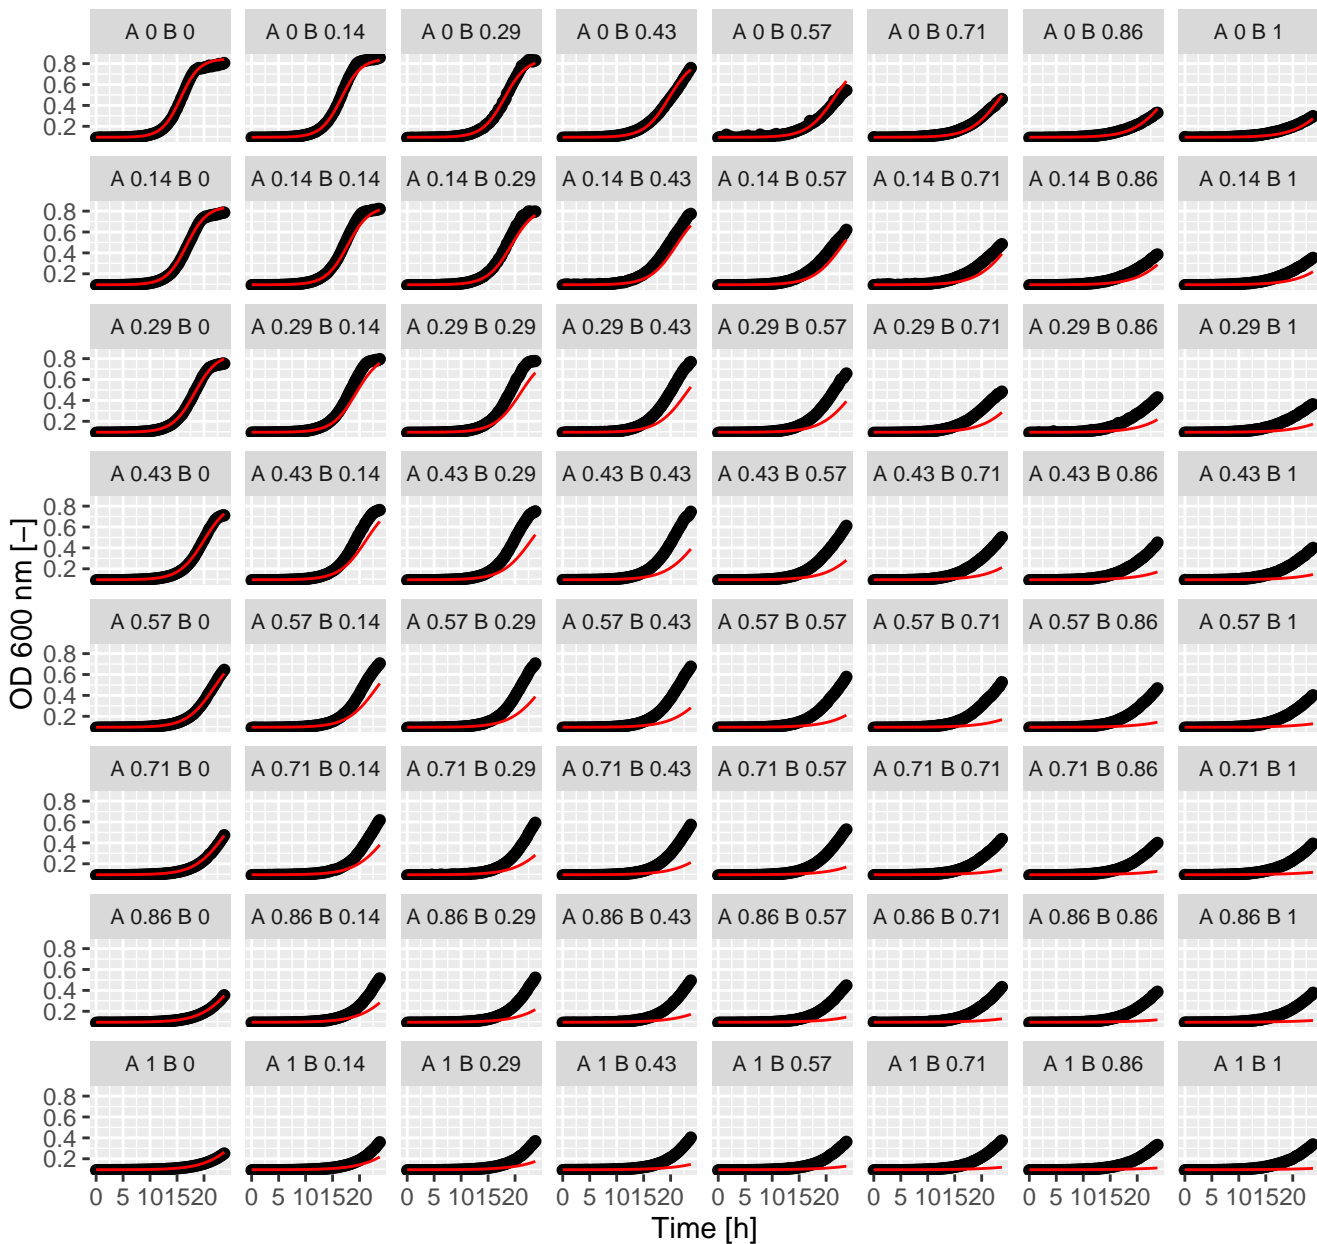

Cyc.Rad (= Ax.Bx) full GPDI  
Int\_AB = 0.93 and Int\_BA = 1.57 at EC50

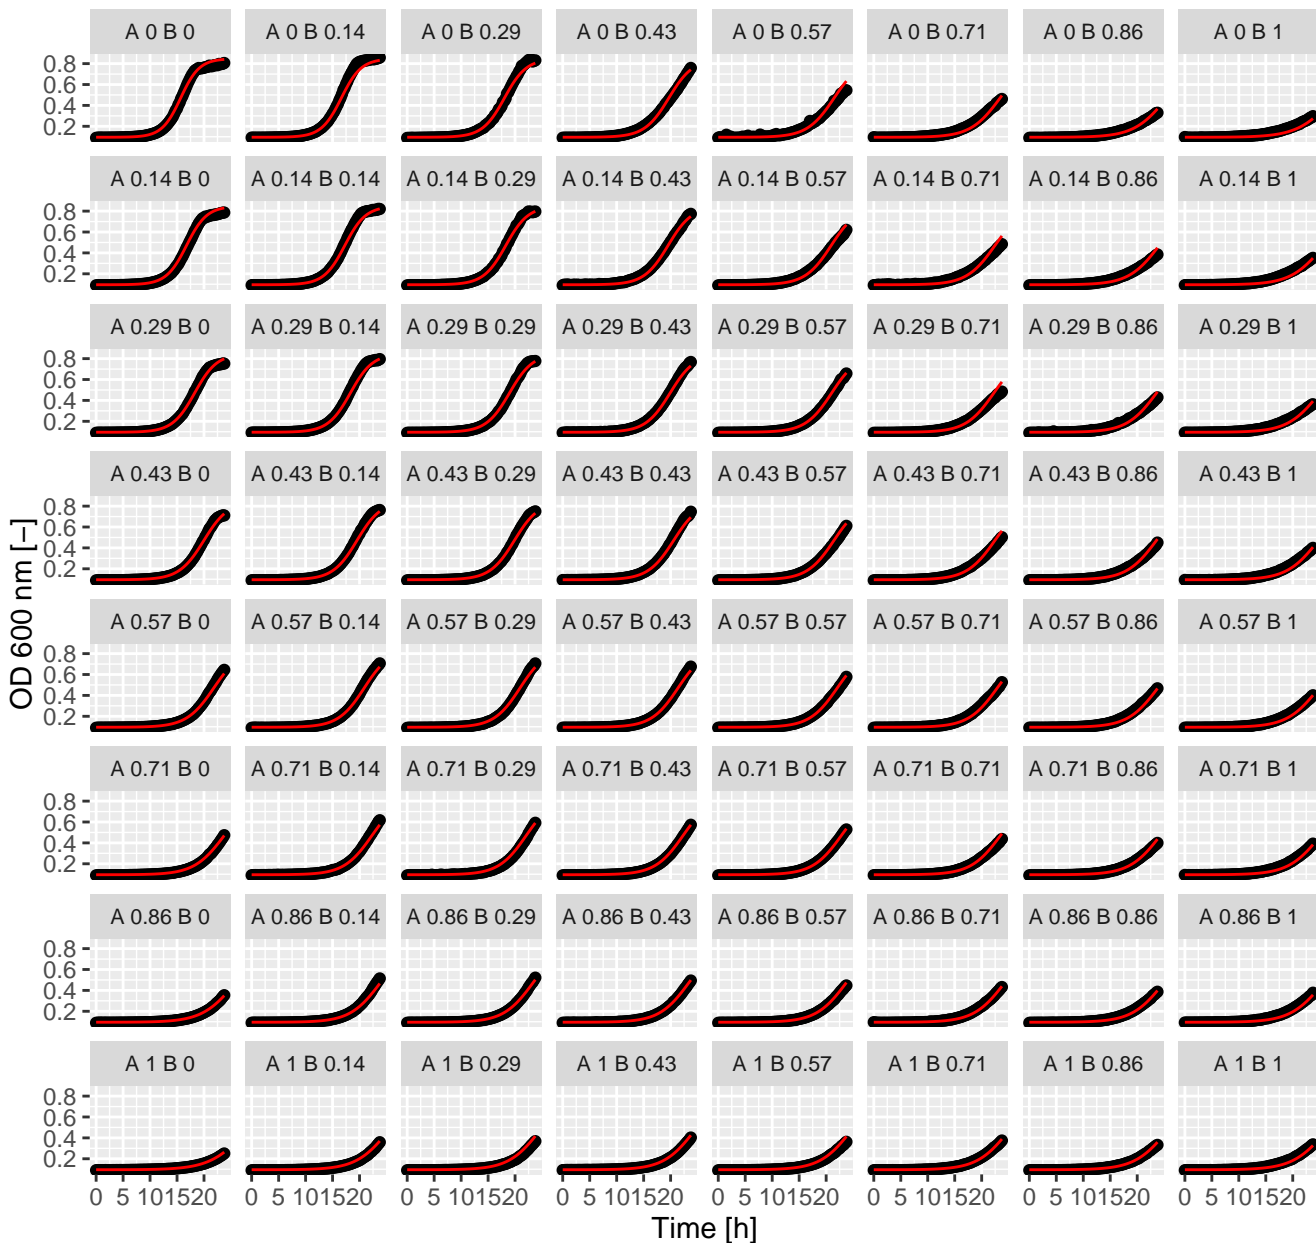

Cyc.Pen (= Ax.Bx) exp. additivity (BI)  
Int\_AB = 0 and Int\_BA = 0 at EC50

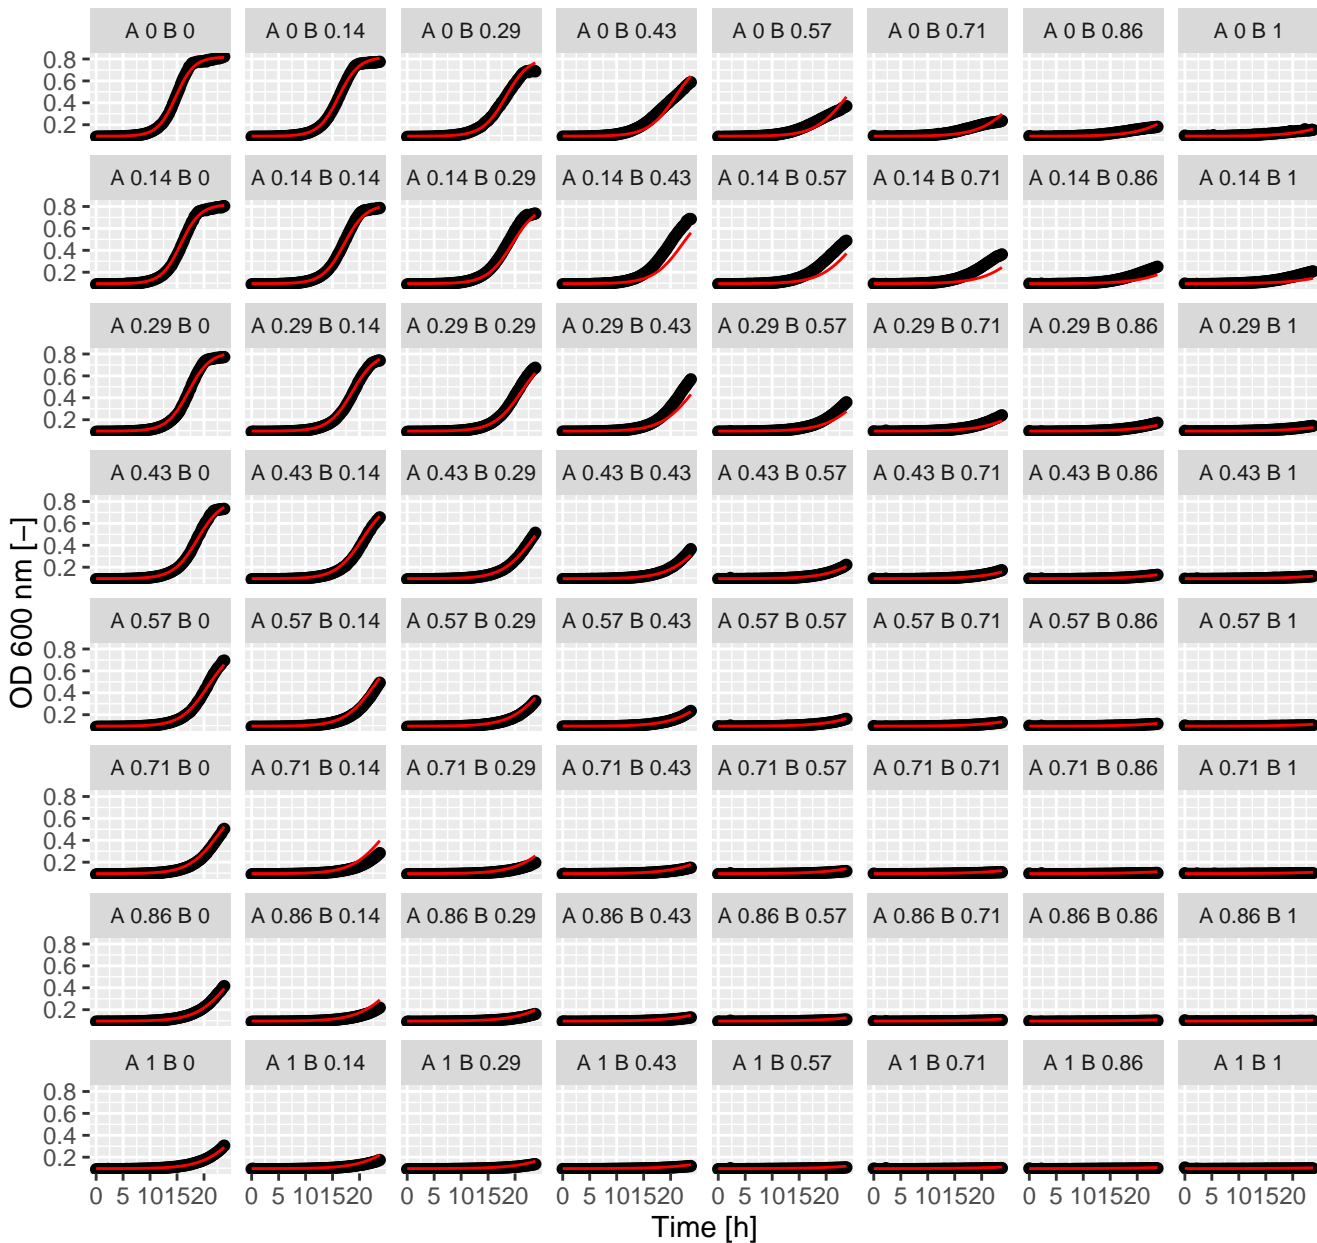

Cyc.Pen (= Ax.Bx) full GPDI  
Int\_AB = -0.61 and Int\_BA = 5.68 at EC50

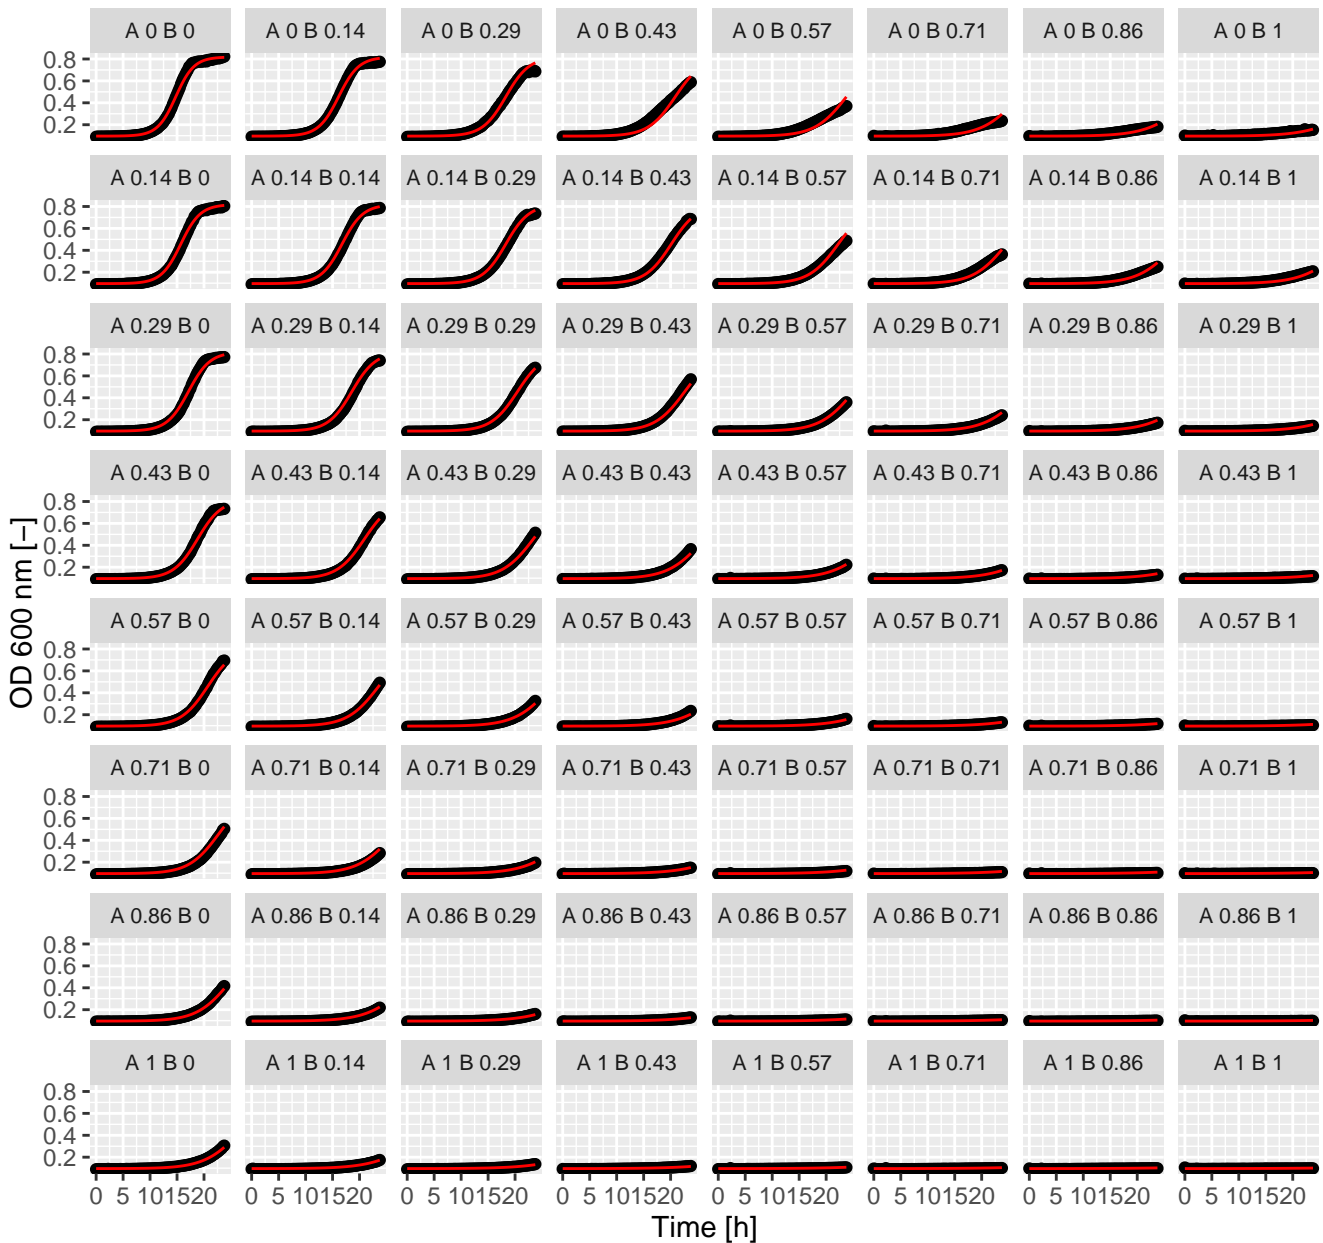



Cyc.Lat (= Ax.Bx) exp. additivity (BI)  
Int\_AB = 0 and Int\_BA = 0 at EC50

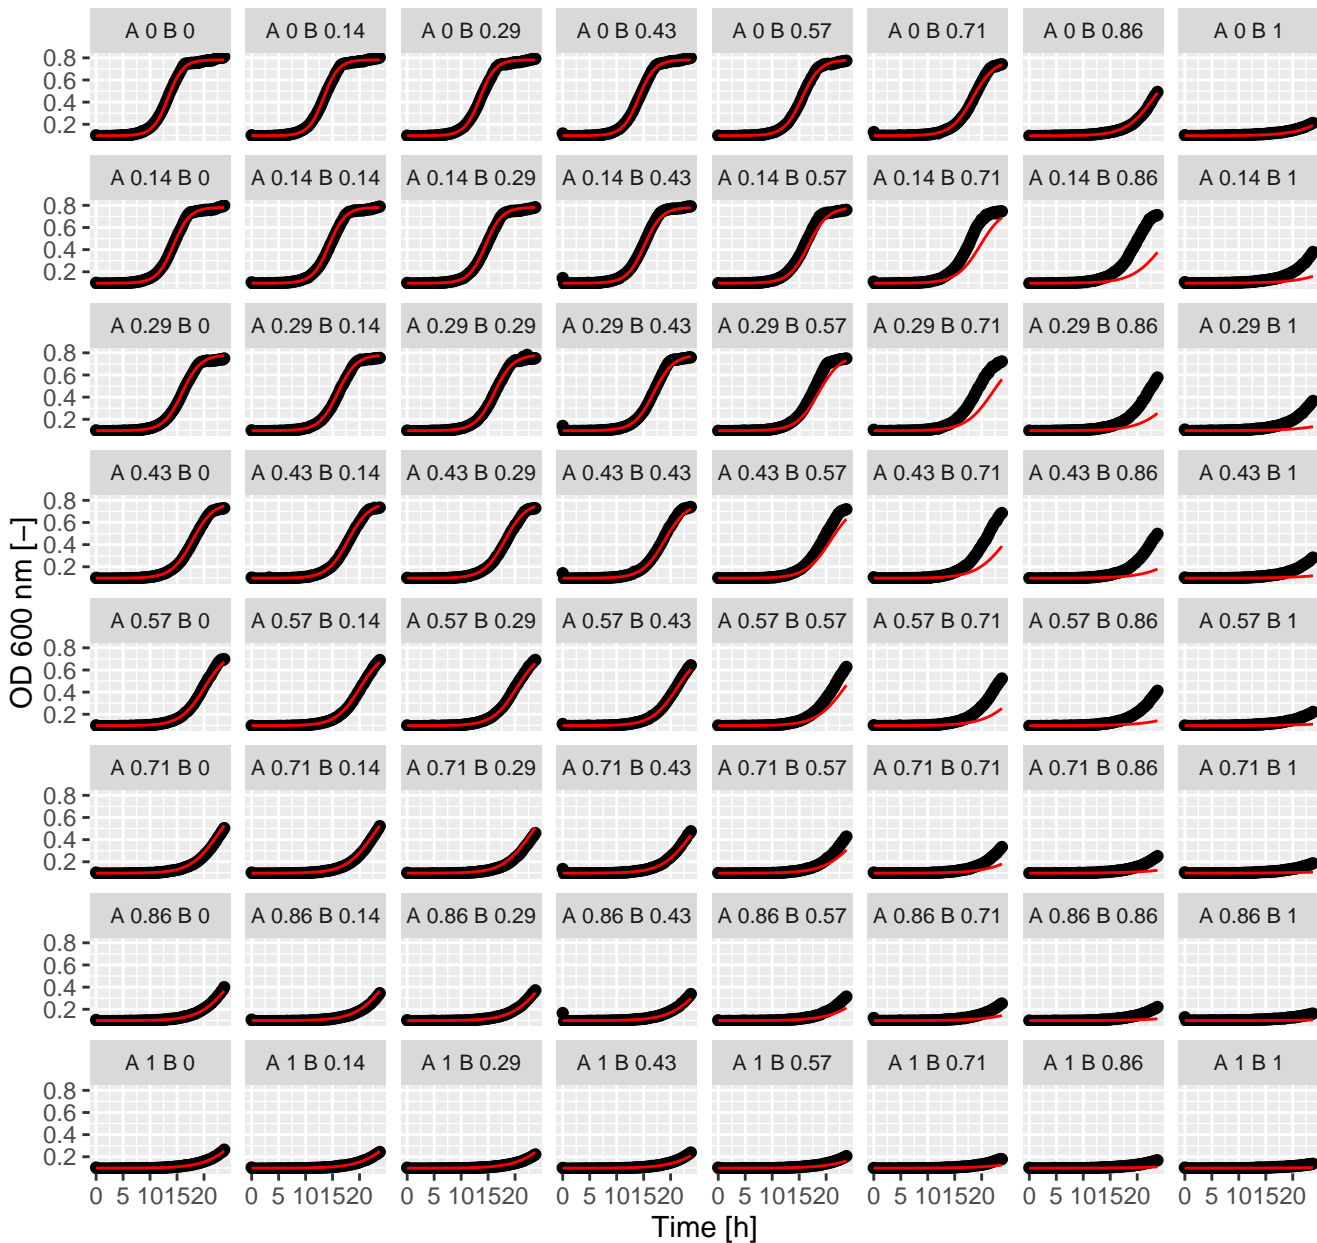

Cyc.Lat (= Ax.Bx) full GPDI  
Int\_AB = -0.03 and Int\_BA = 0.41 at EC50

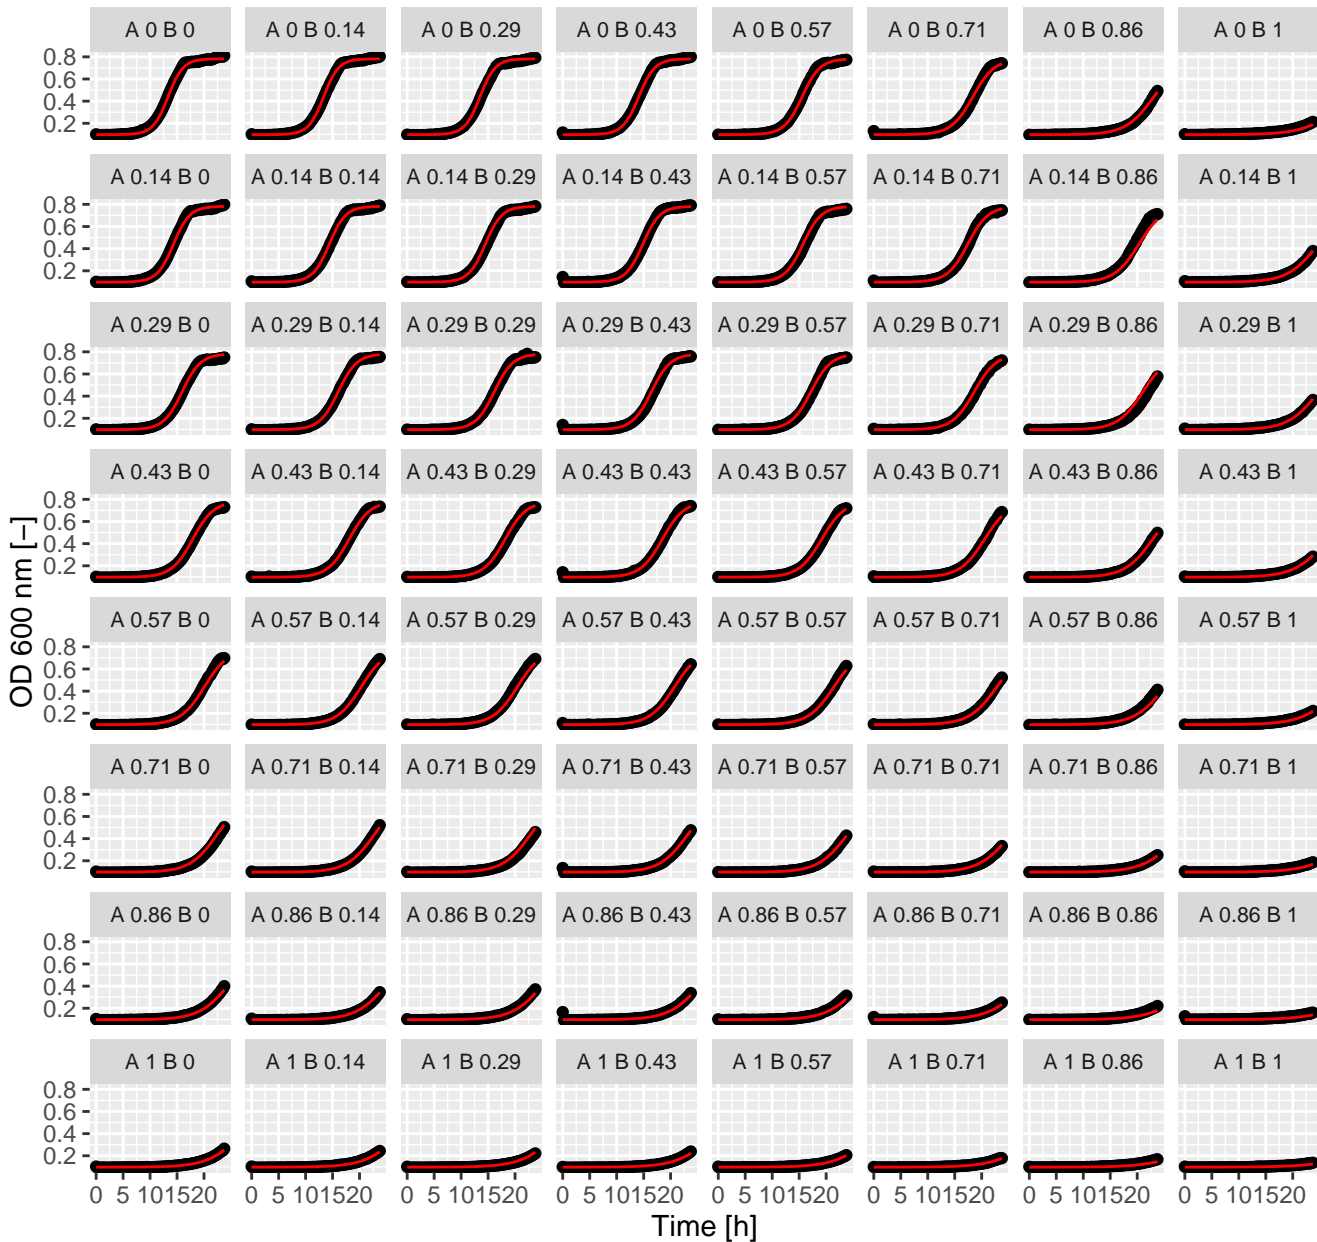

Cyc.Cyc (= Ax.Bx) exp. additivity (BI)  
Int\_AB = 0 and Int\_BA = 0 at EC50

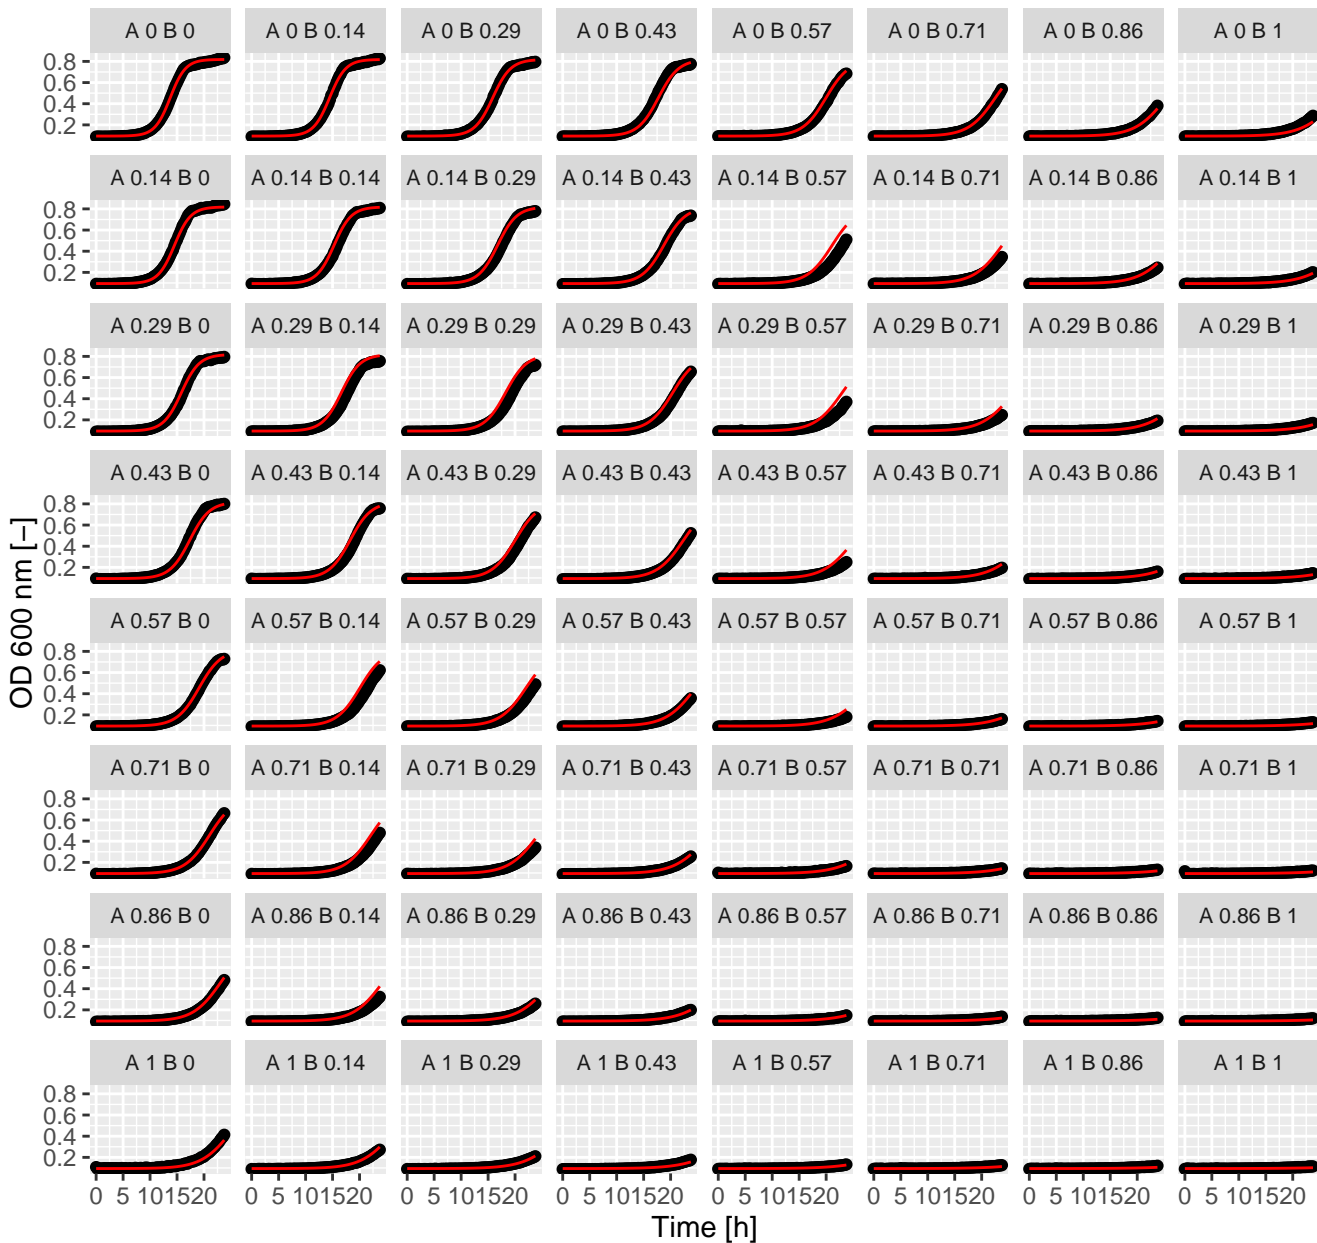

Cyc.Cyc (= Ax.Bx) full GPDI  
Int\_AB = -0.1 and Int\_BA = -0.08 at EC50

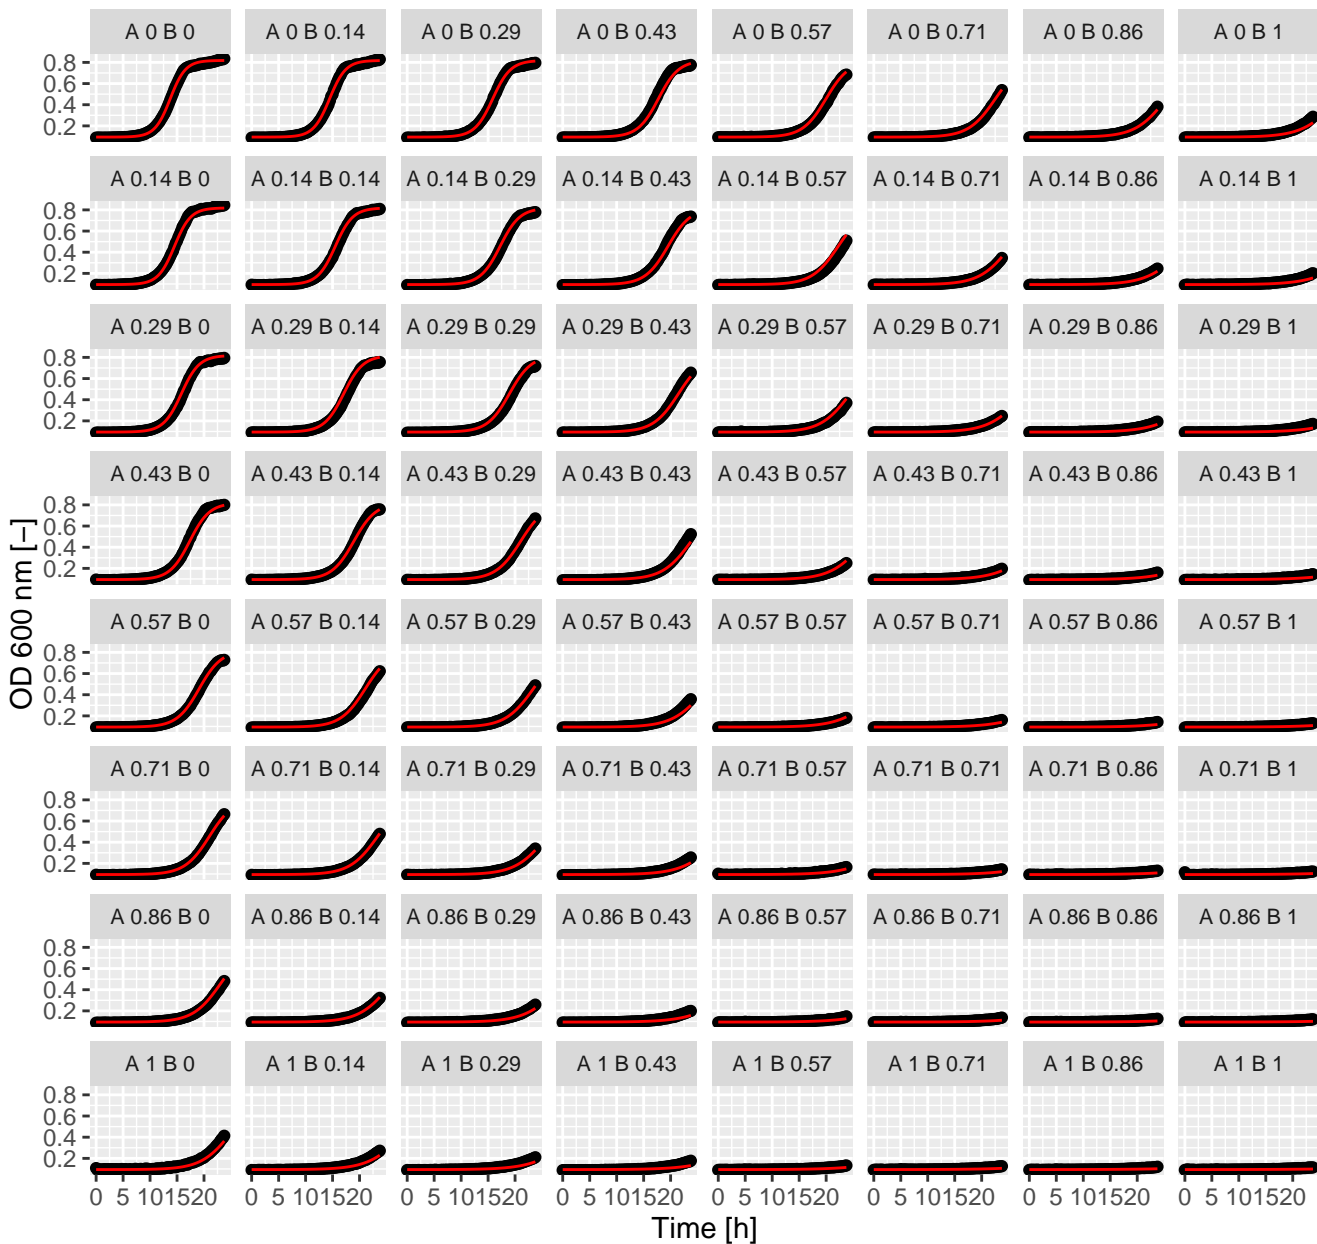

Clo.Rad (= Ax.Bx) exp. additivity (BI)  
Int\_AB = 0 and Int\_BA = 0 at EC50

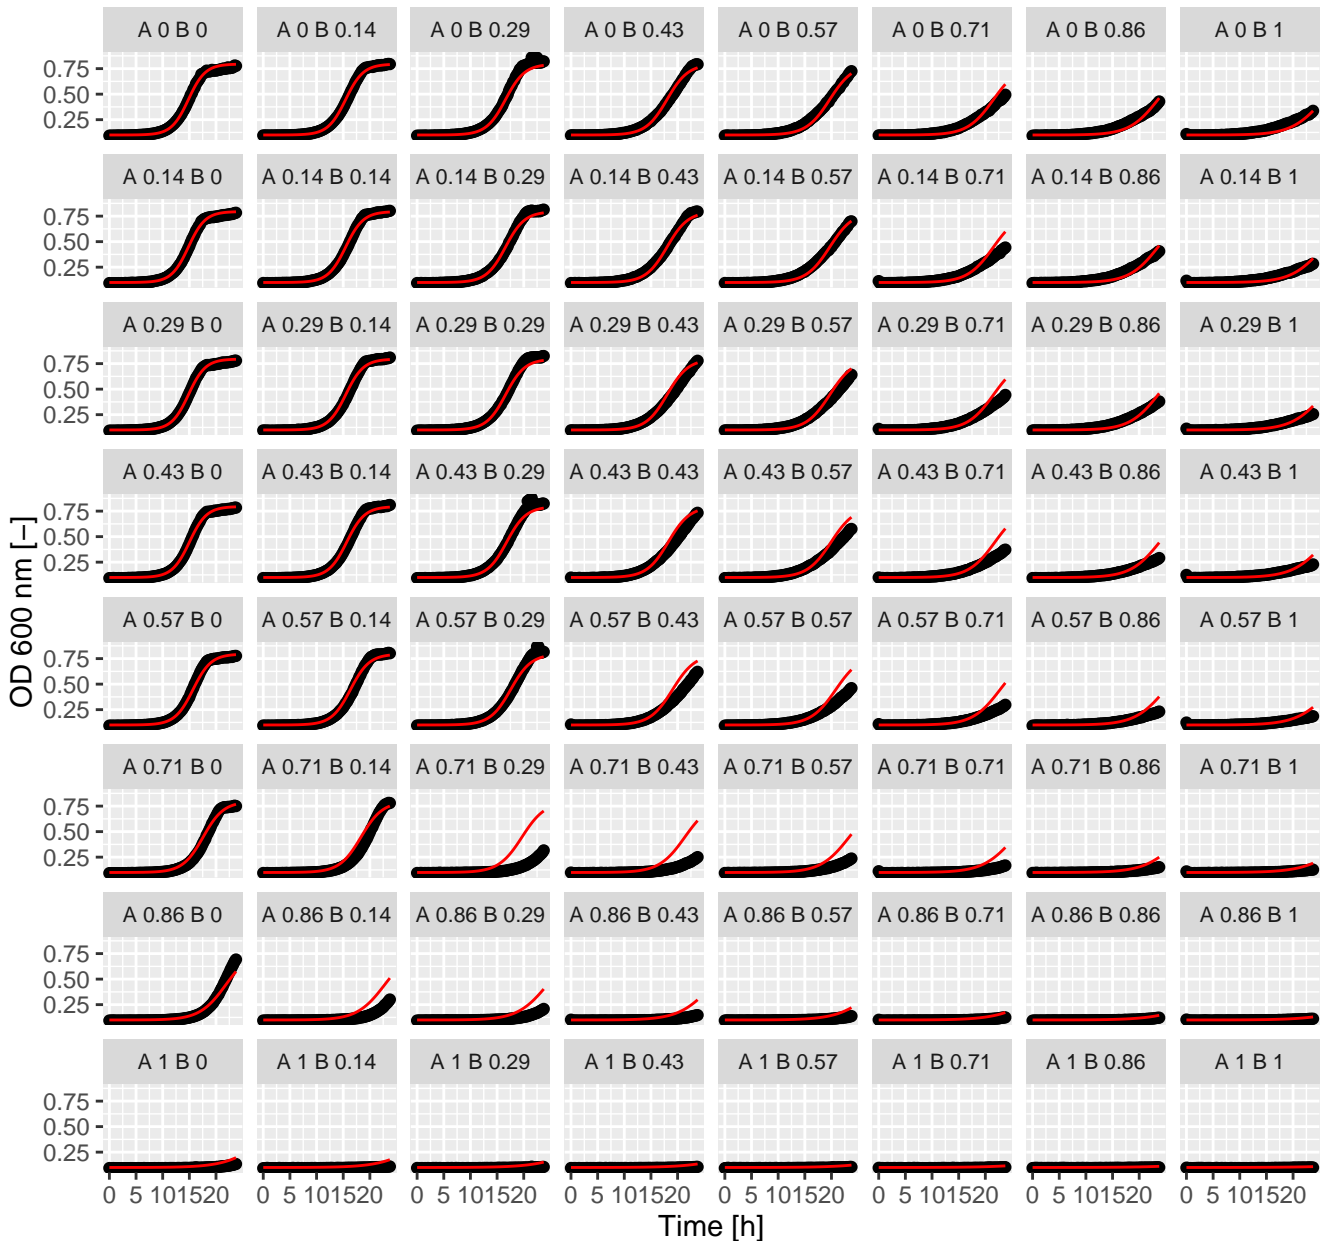

Clo.Rad (= Ax.Bx) full GPDI  
Int\_AB = -0.22 and Int\_BA = -0.08 at EC50

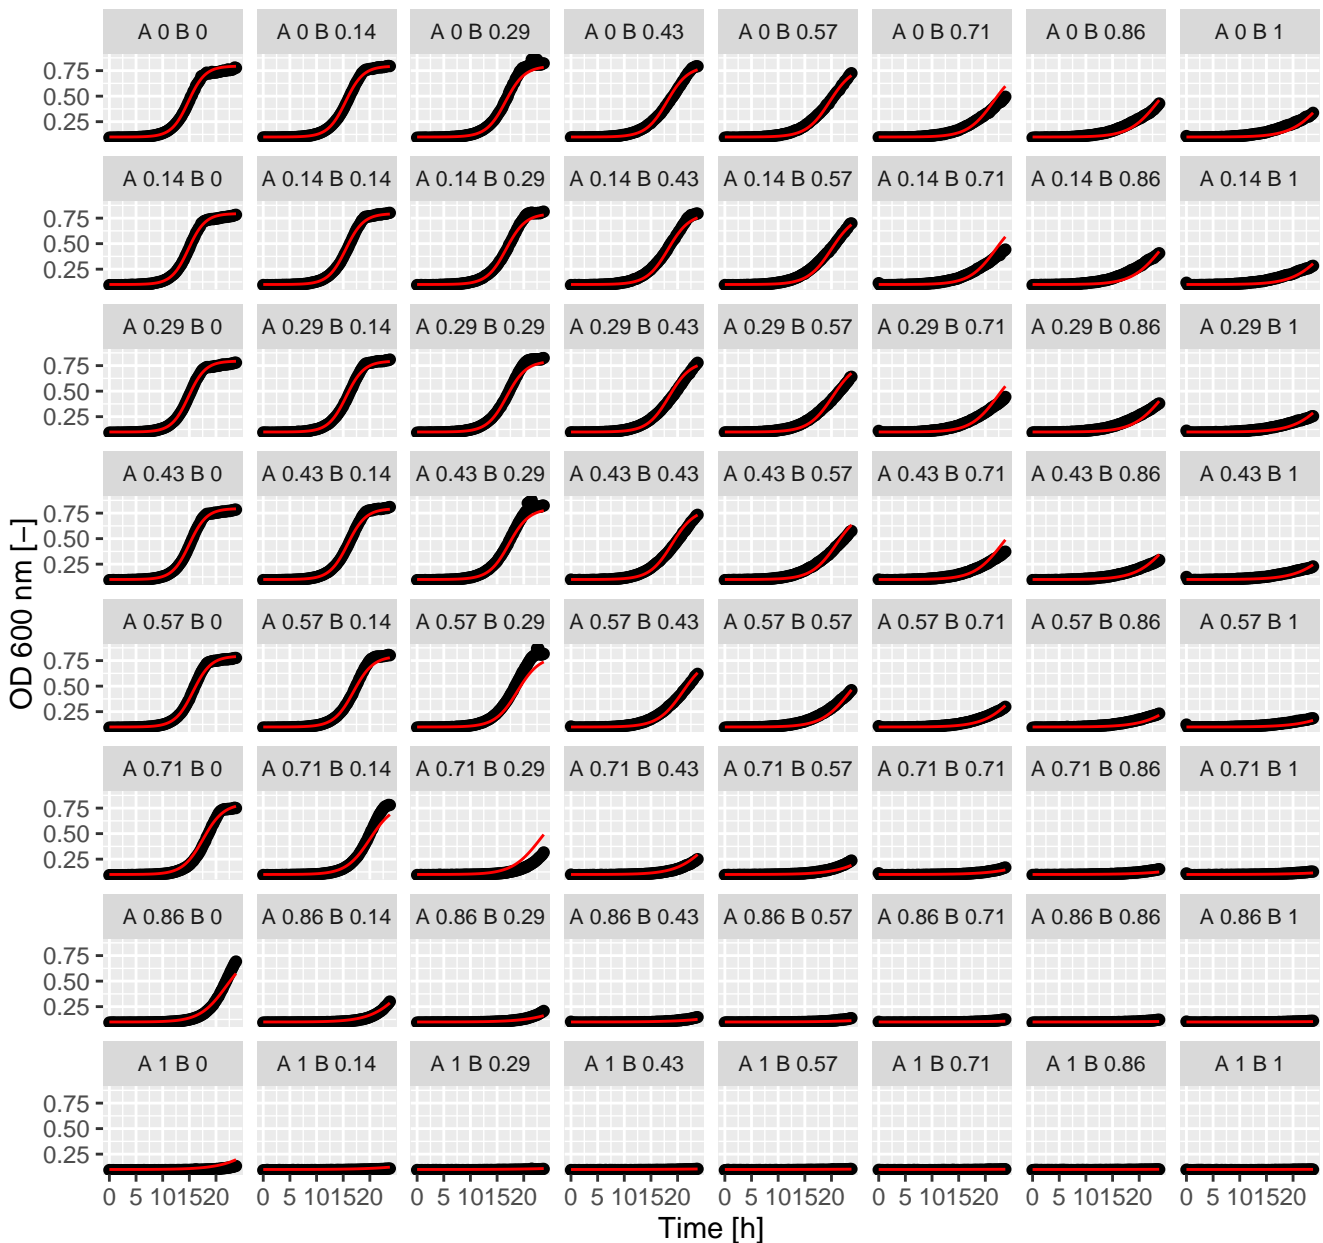

Cis.Ter (= Ax.Bx) exp. additivity (BI)  
Int\_AB = 0 and Int\_BA = 0 at EC50

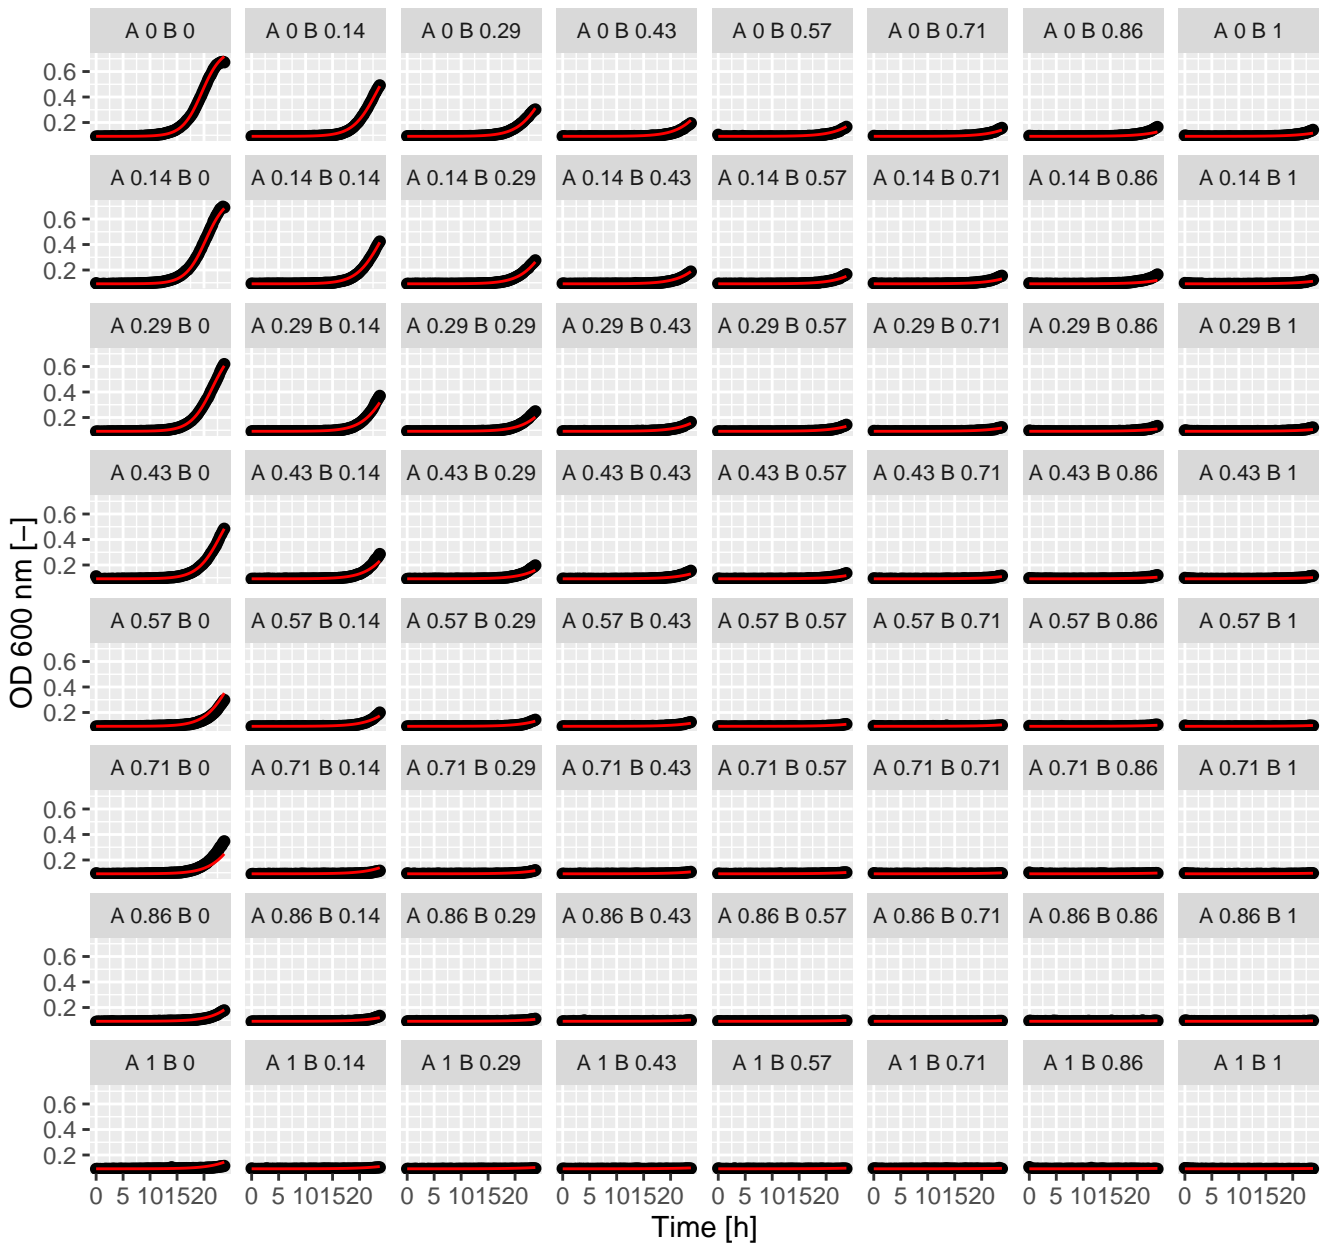

Cis.Ter (= Ax.Bx) full GPD1  
Int\_AB = -0.22 and Int\_BA = 0.97 at EC50

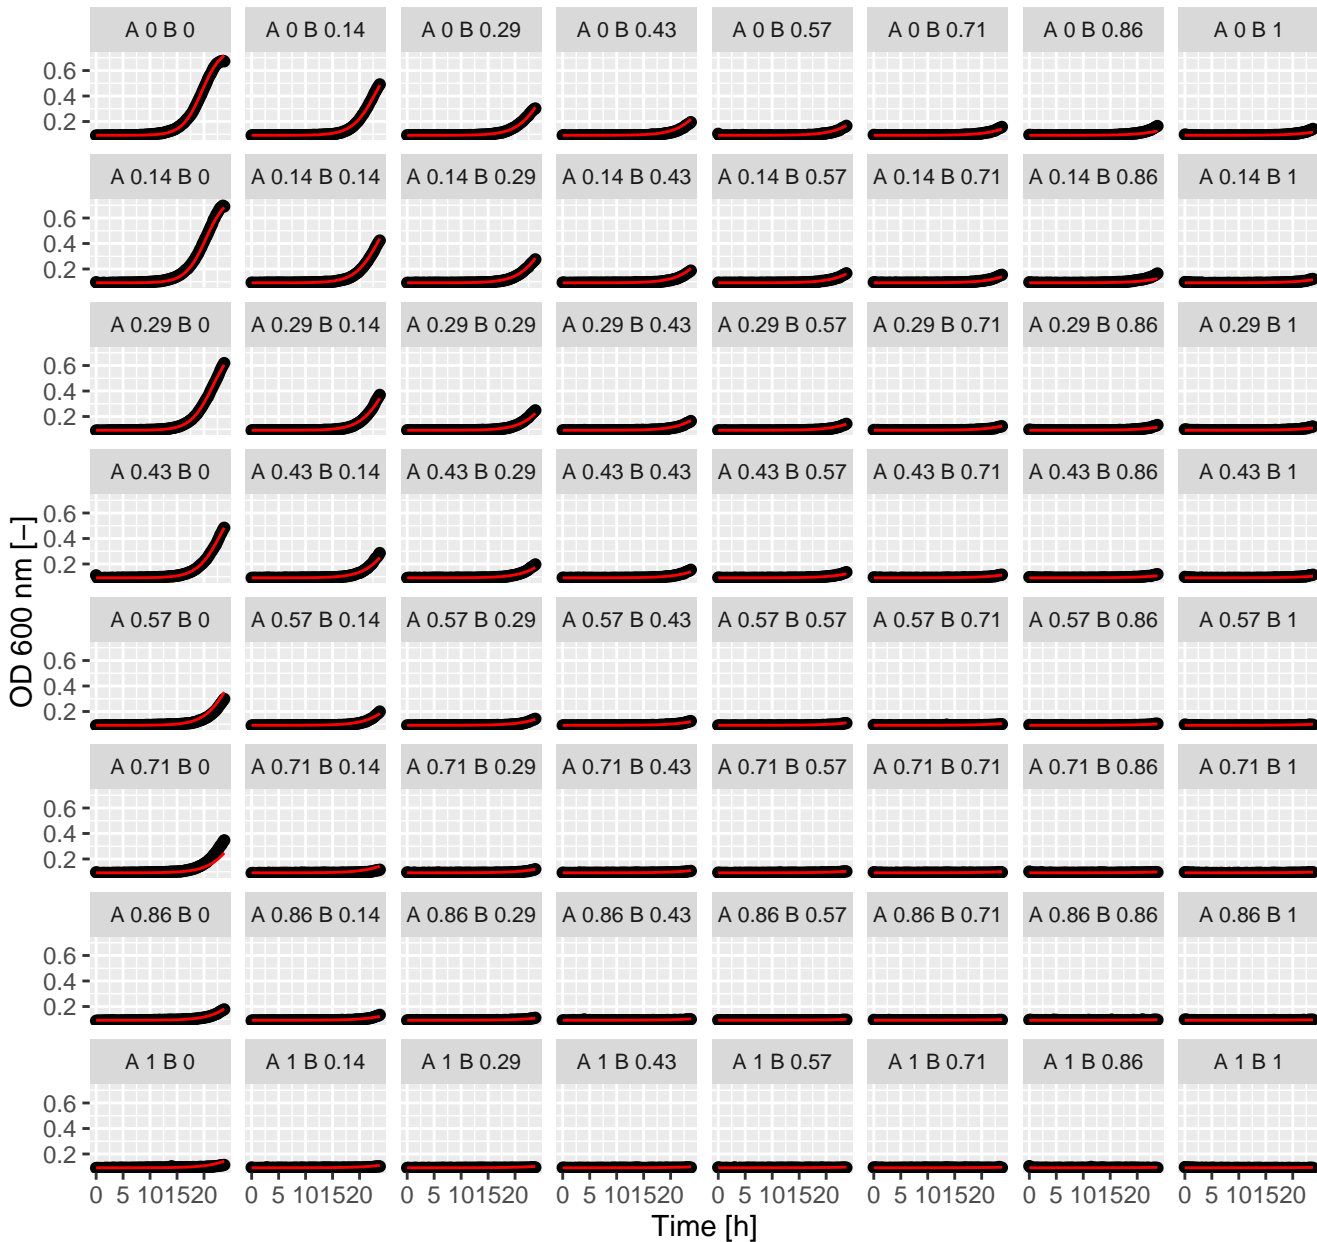



Cis.Tac (= Ax.Bx) exp. additivity (BI)  
Int\_AB = 0 and Int\_BA = 0 at EC50

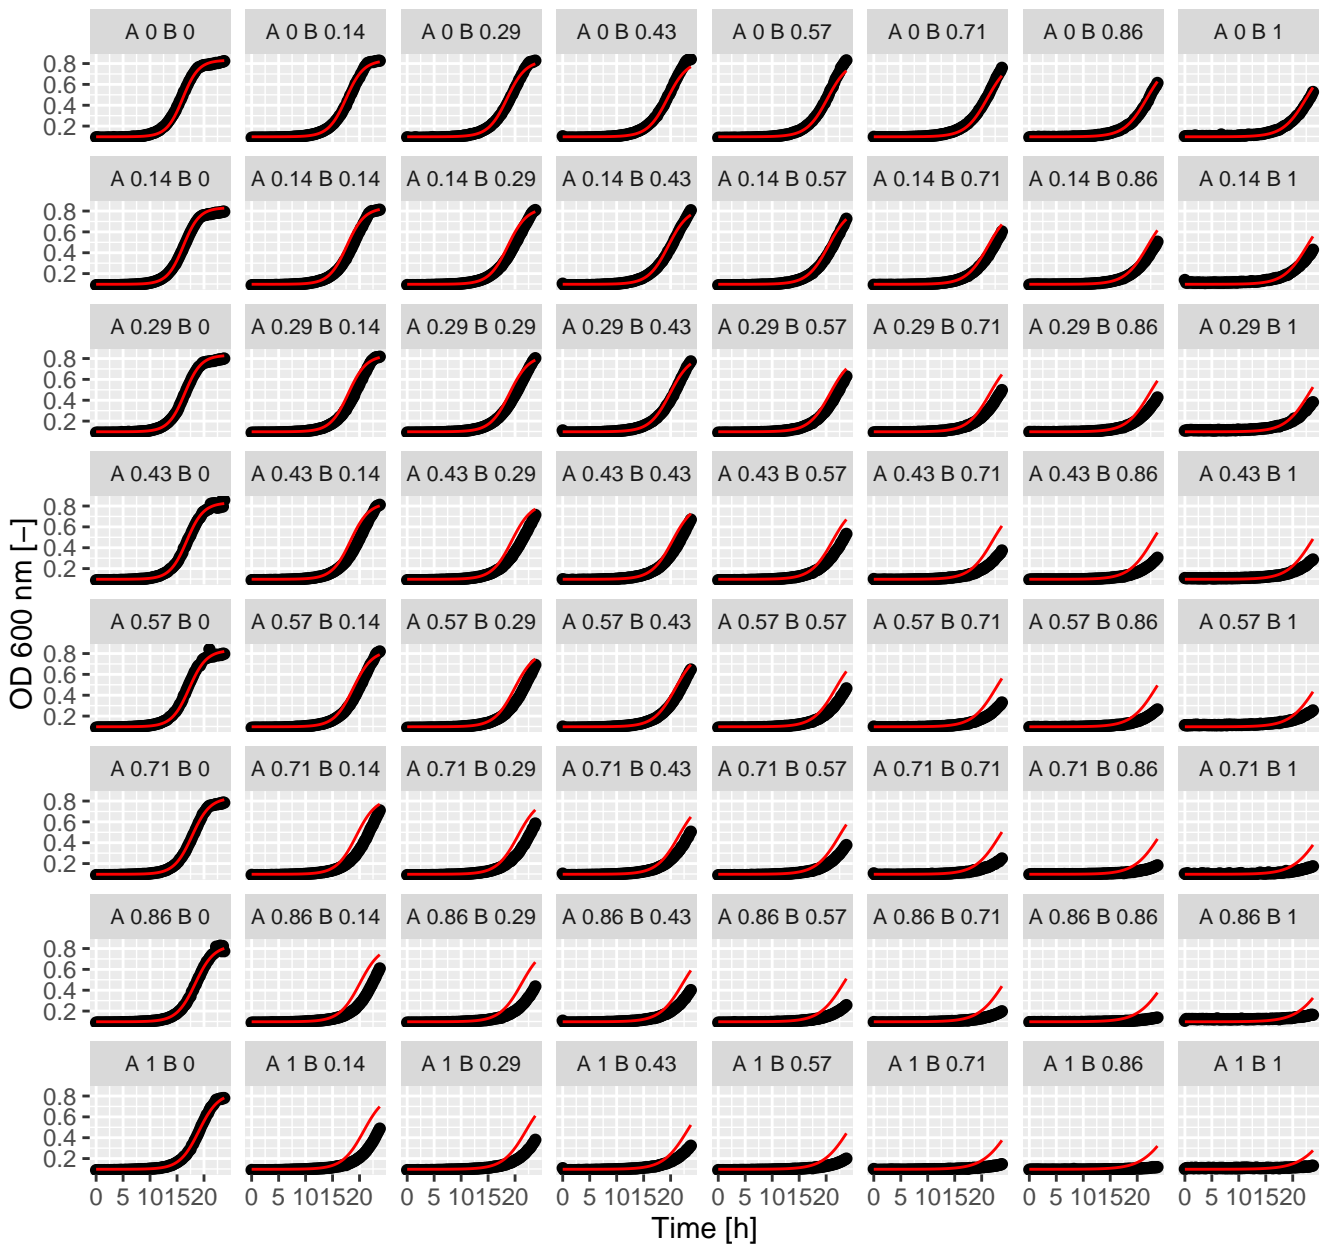

Cis.Tac (= Ax.Bx) full GPDI  
Int\_AB = -0.27 and Int\_BA = -0.29 at EC50

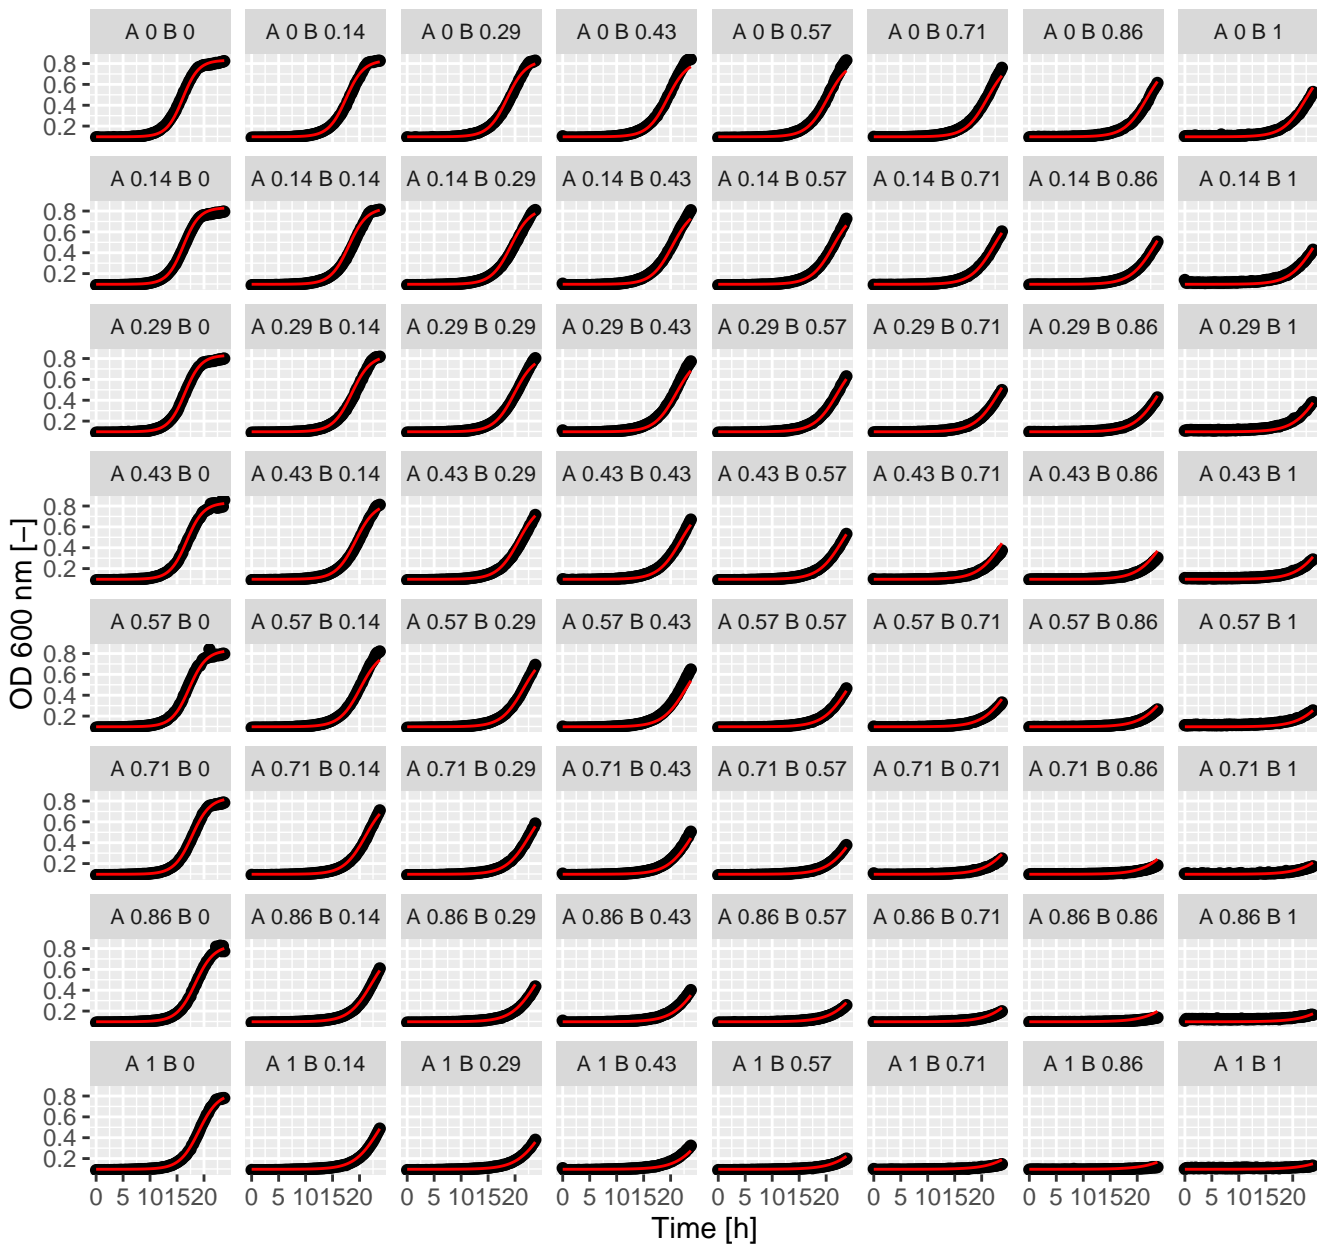

Cis.Sta (= Ax.Bx) exp. additivity (BI)  
 Int\_AB = 0 and Int\_BA = 0 at EC50

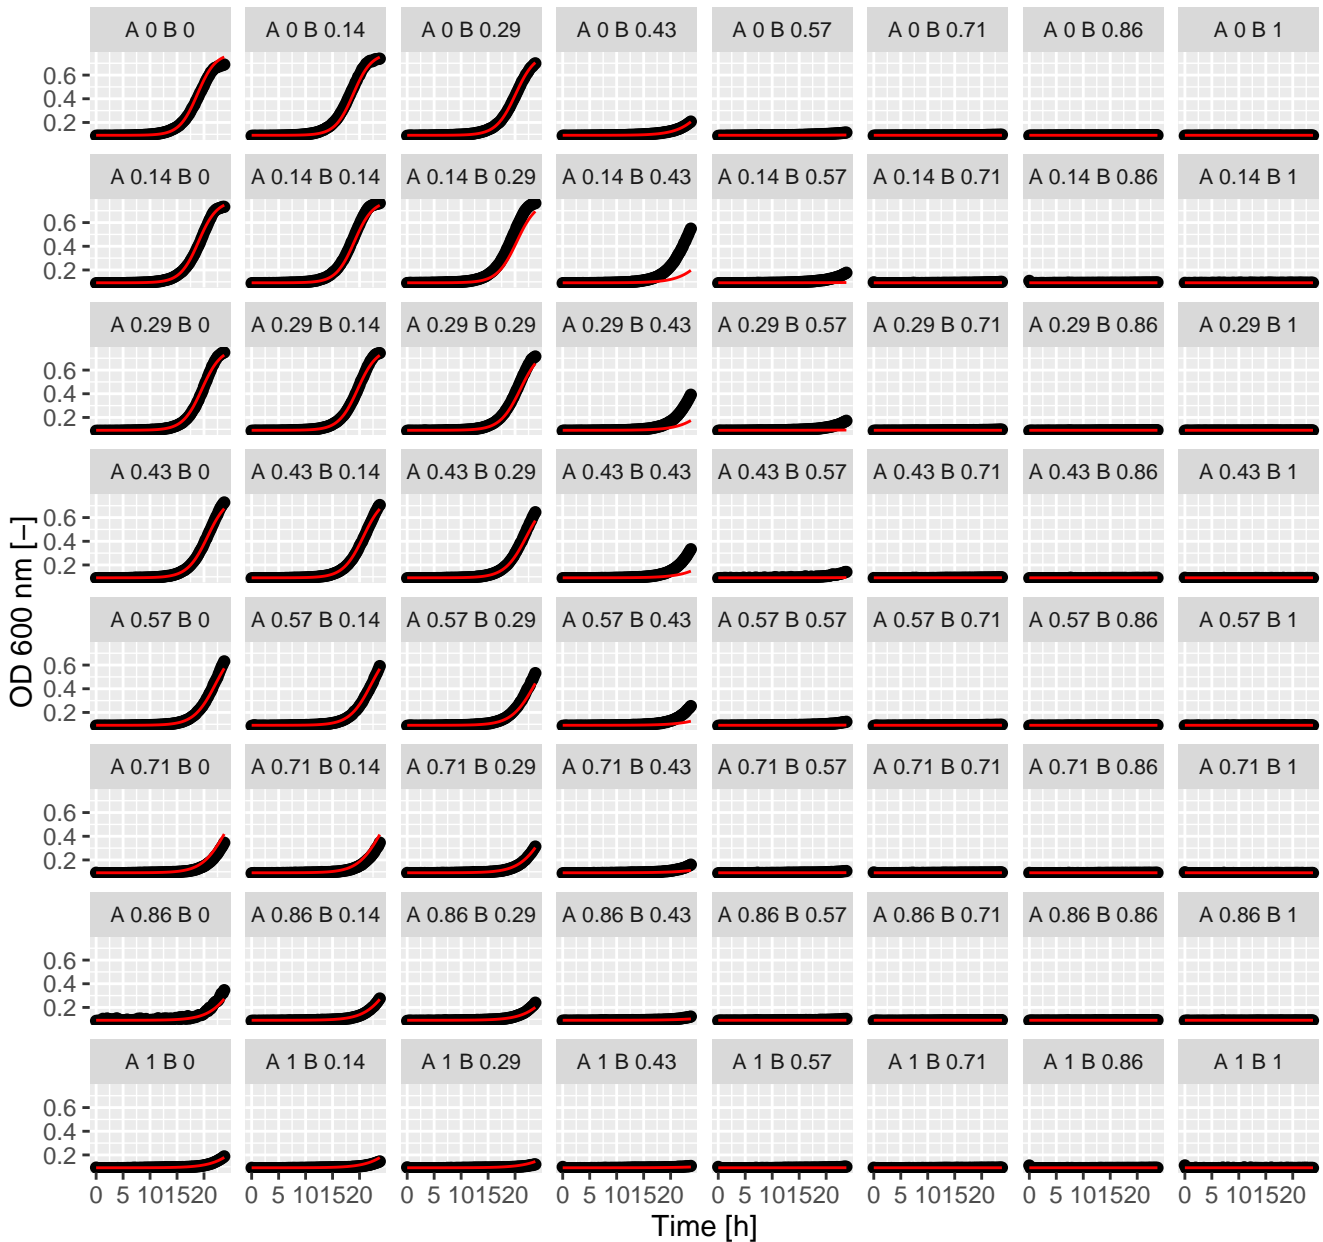

Cis.Sta (= Ax.Bx) full GPDI  
 Int\_AB = -0.05 and Int\_BA = 0.2 at EC50

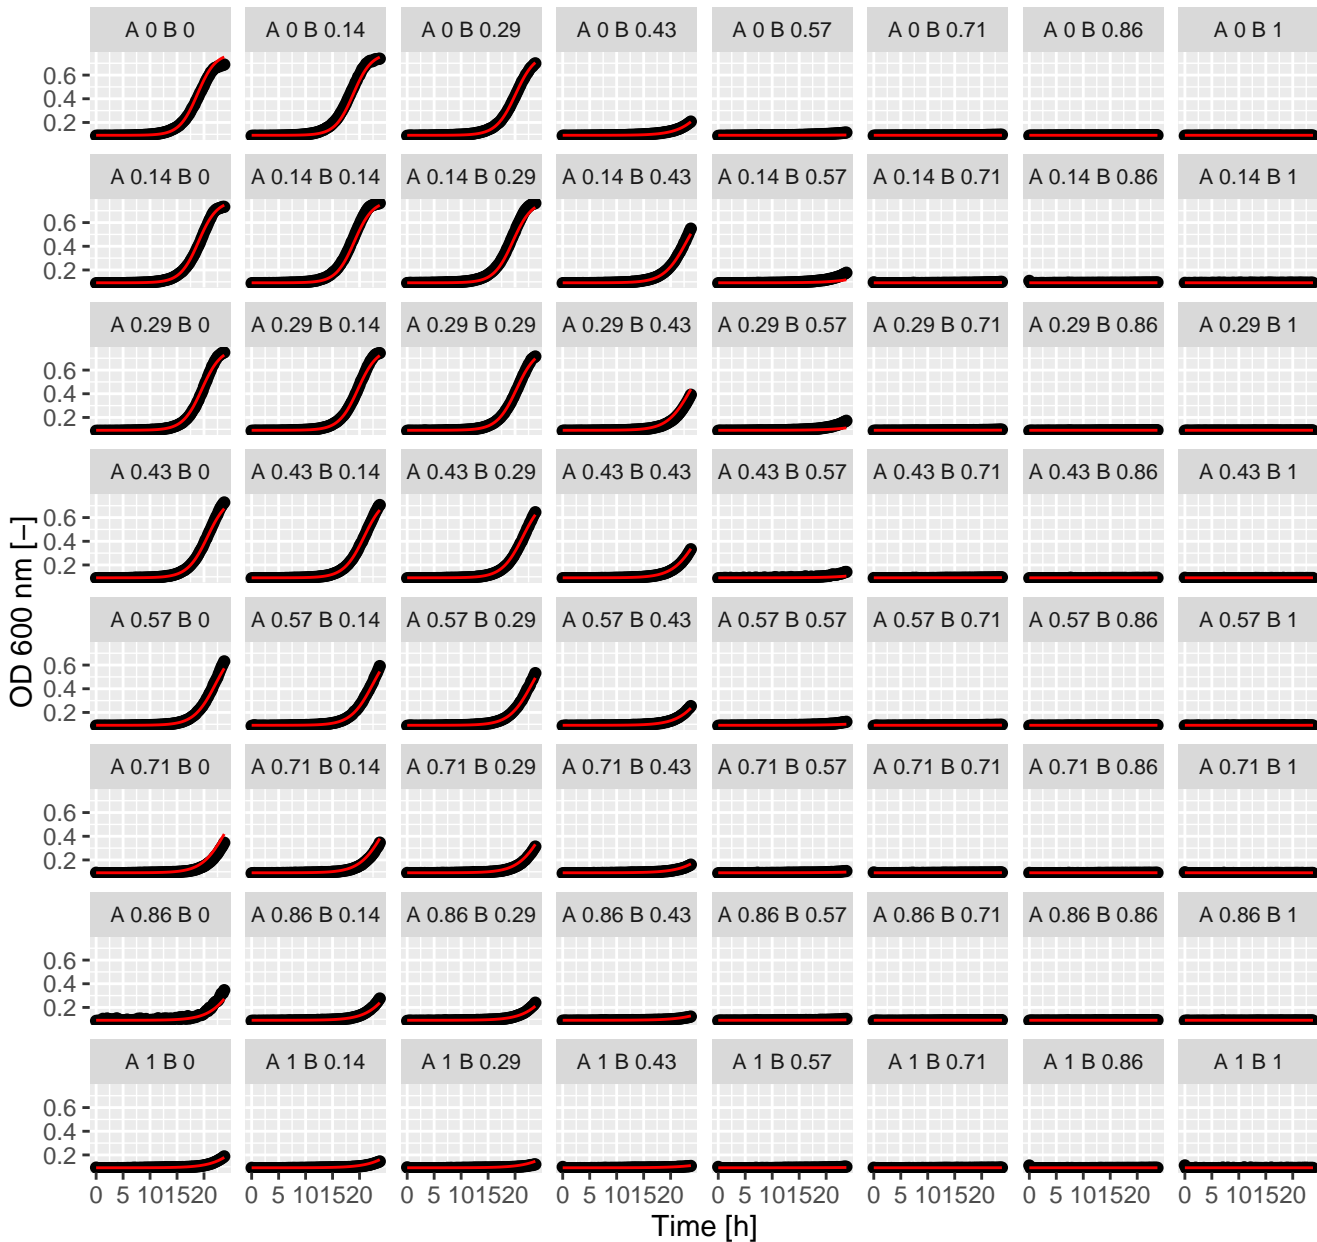

Cis.Lat (= Ax.Bx) exp. additivity (BI)  
Int\_AB = 0 and Int\_BA = 0 at EC50

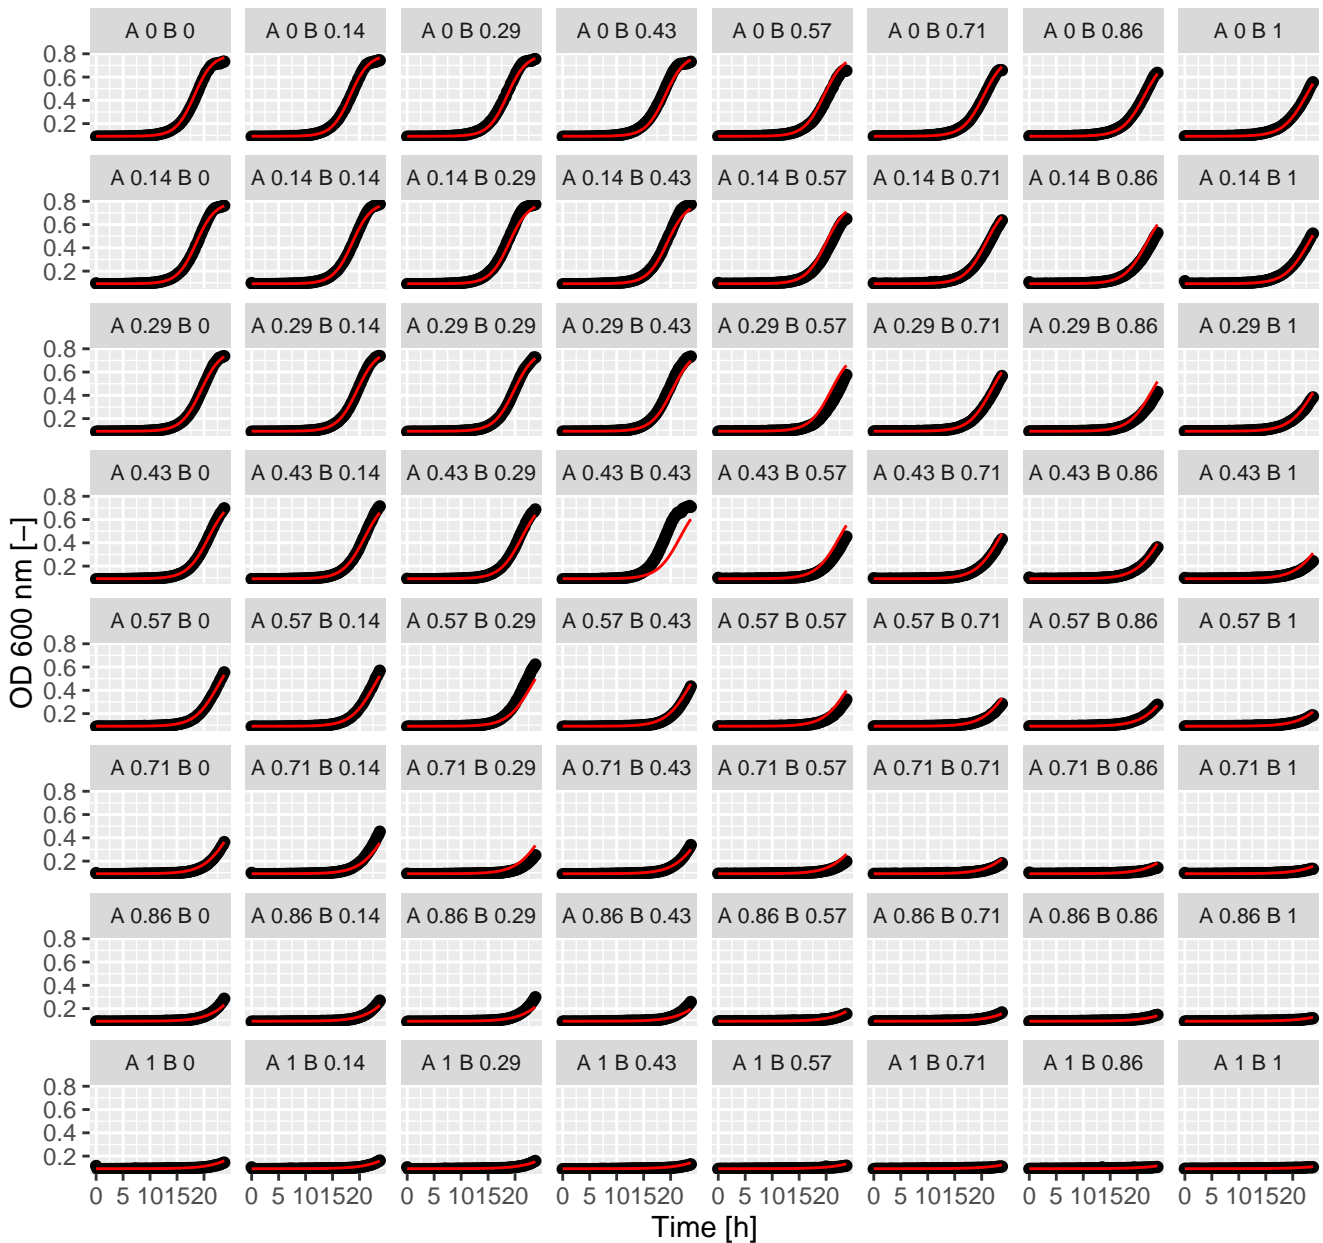

Cis.Lat (= Ax.Bx) full GPD1  
Int\_AB = 0.4 and Int\_BA = -0.43 at EC50

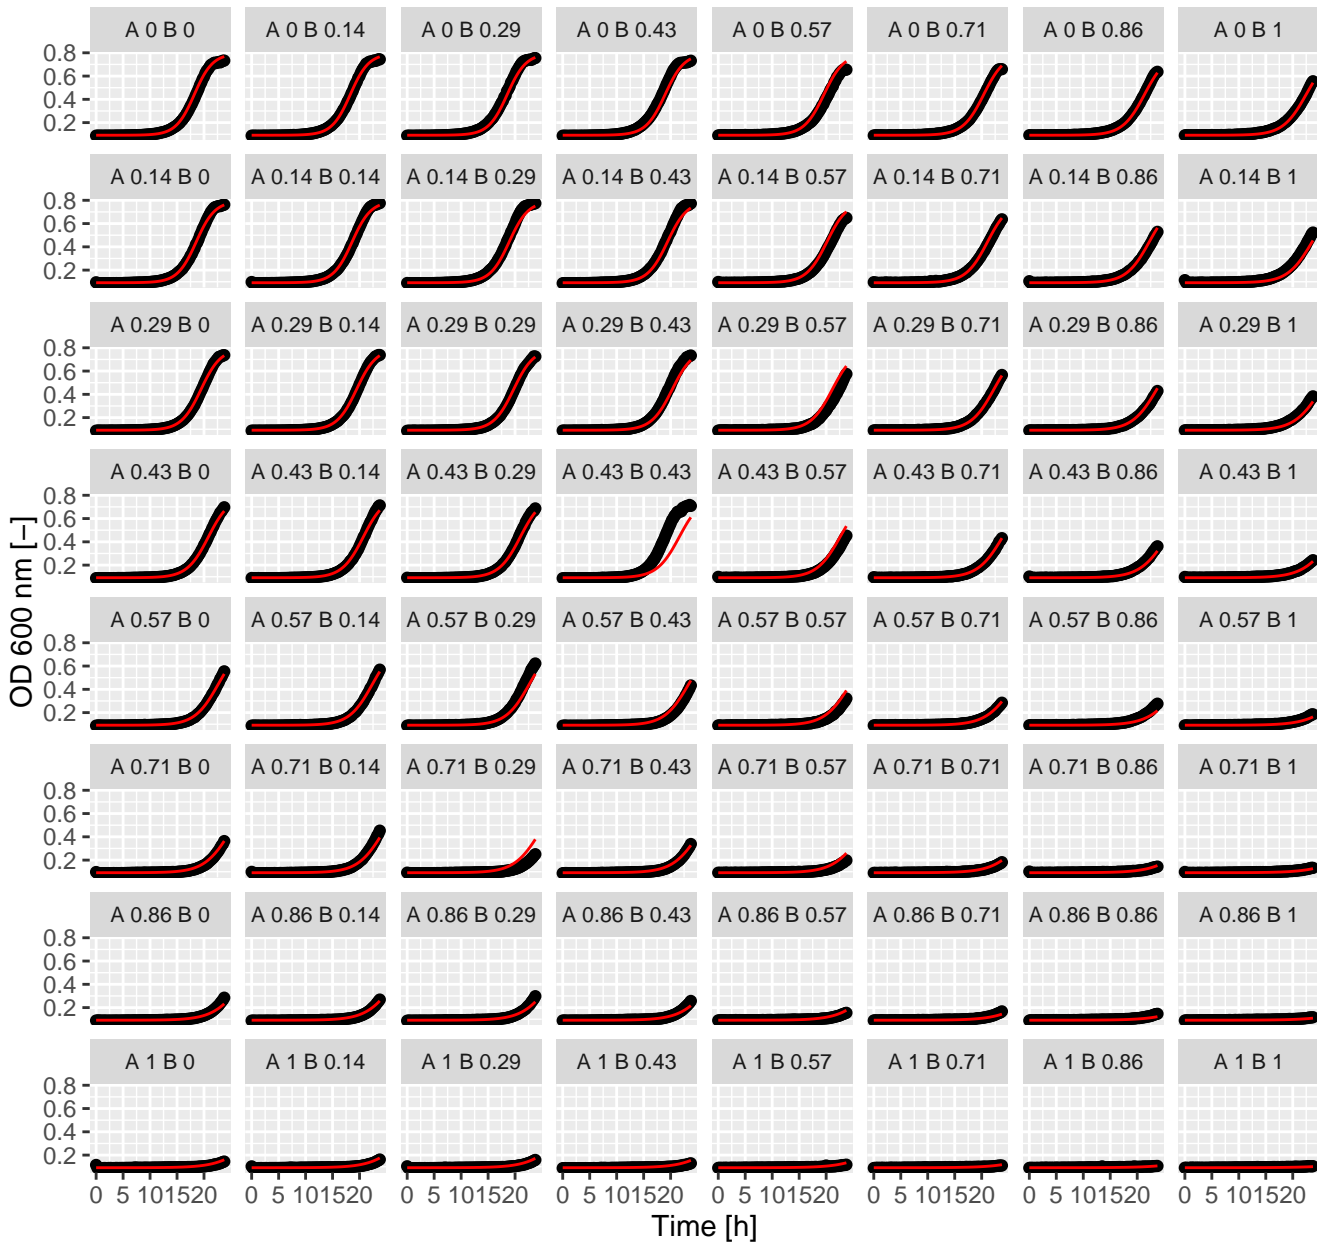

Cis.Cis (= Ax.Bx) exp. additivity (BI)  
Int\_AB = 0 and Int\_BA = 0 at EC50

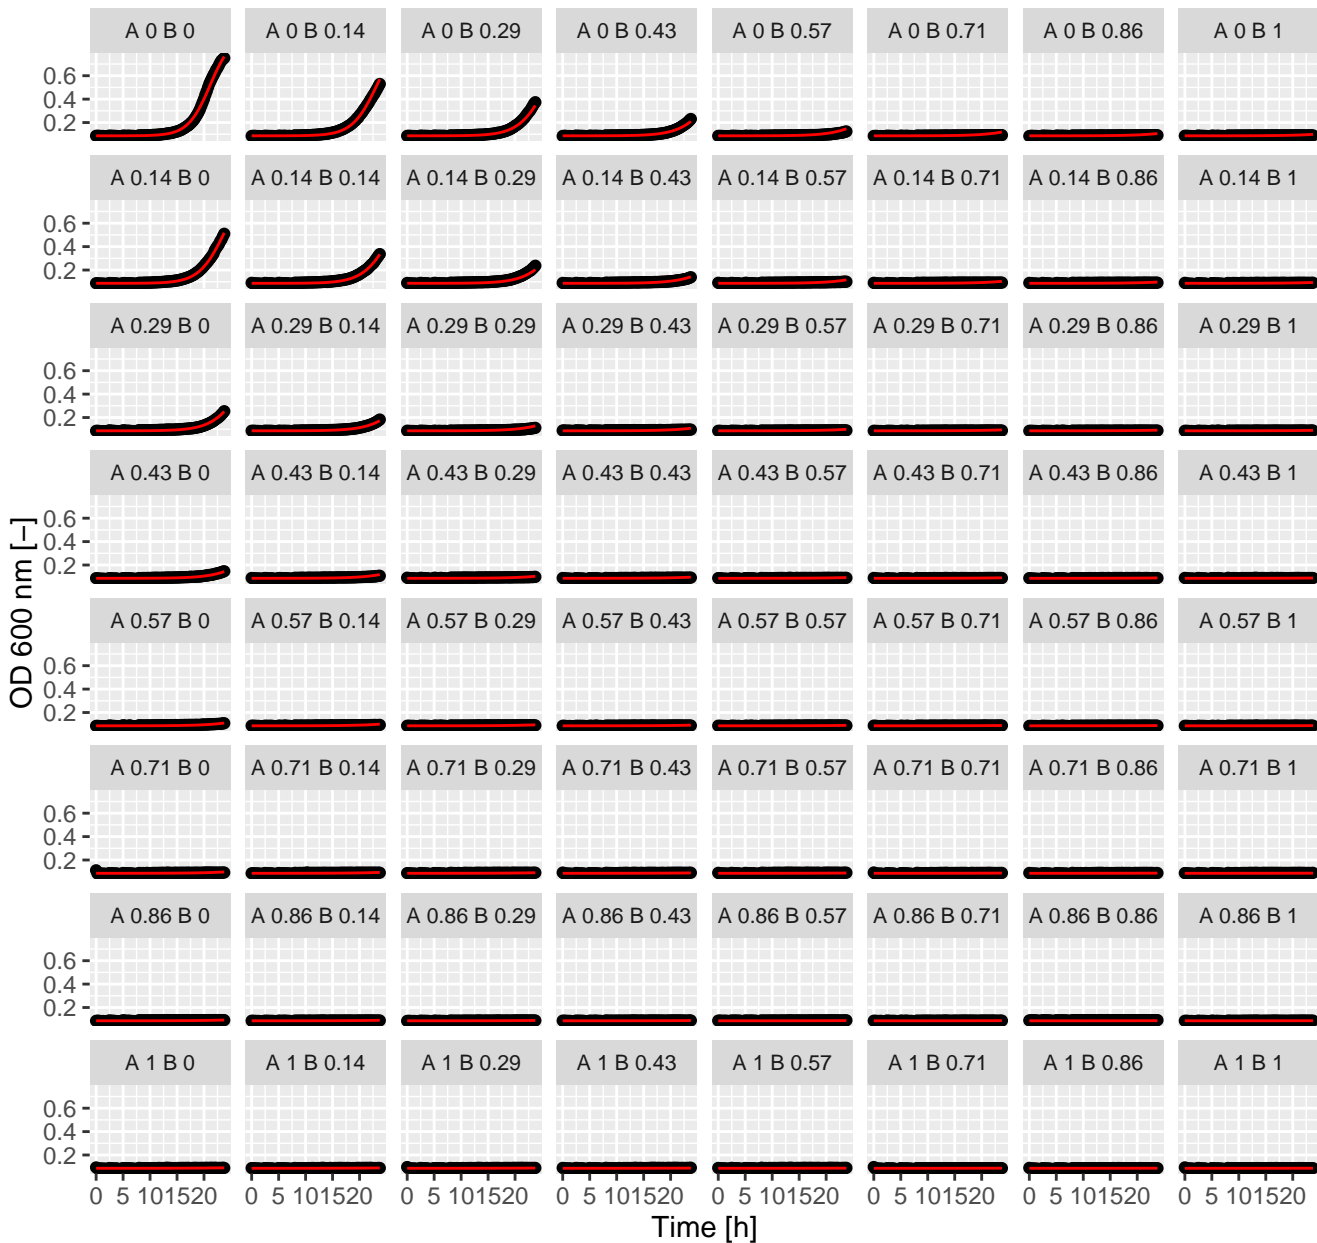

Cis.Cis (= Ax.Bx) full GPDI  
 Int\_AB = -0.39 and Int\_BA = 0.4 at EC50

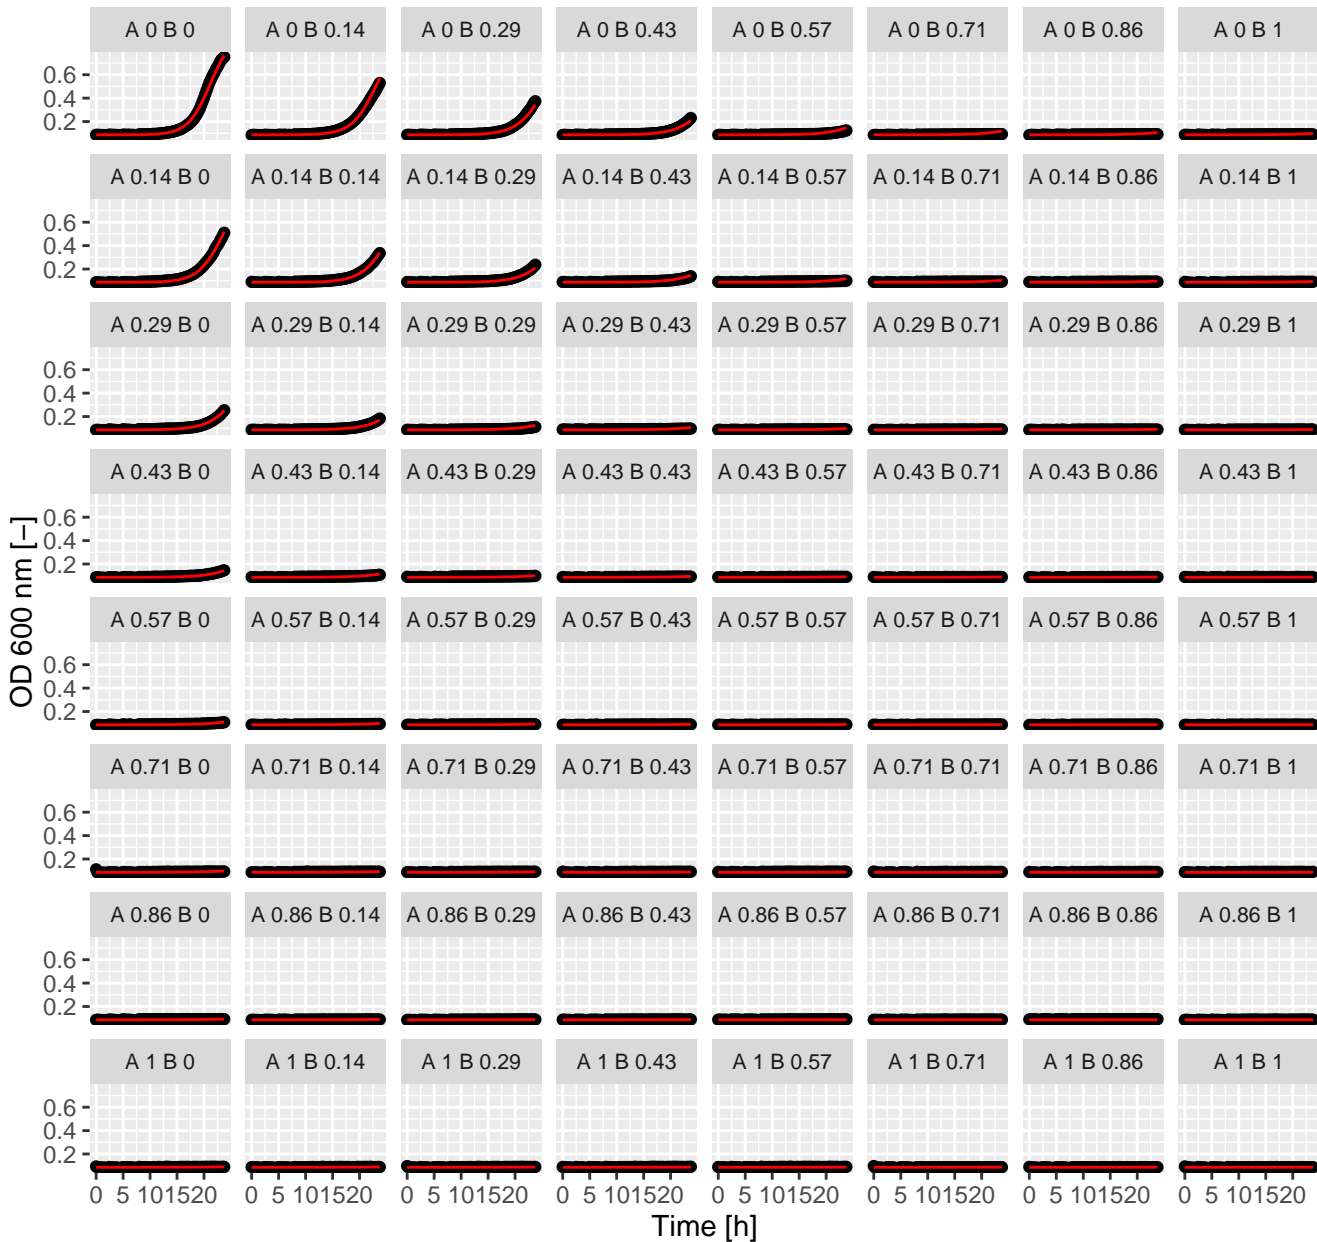



Chl.Ter (= Ax.Bx) exp. additivity (BI)  
Int\_AB = 0 and Int\_BA = 0 at EC50

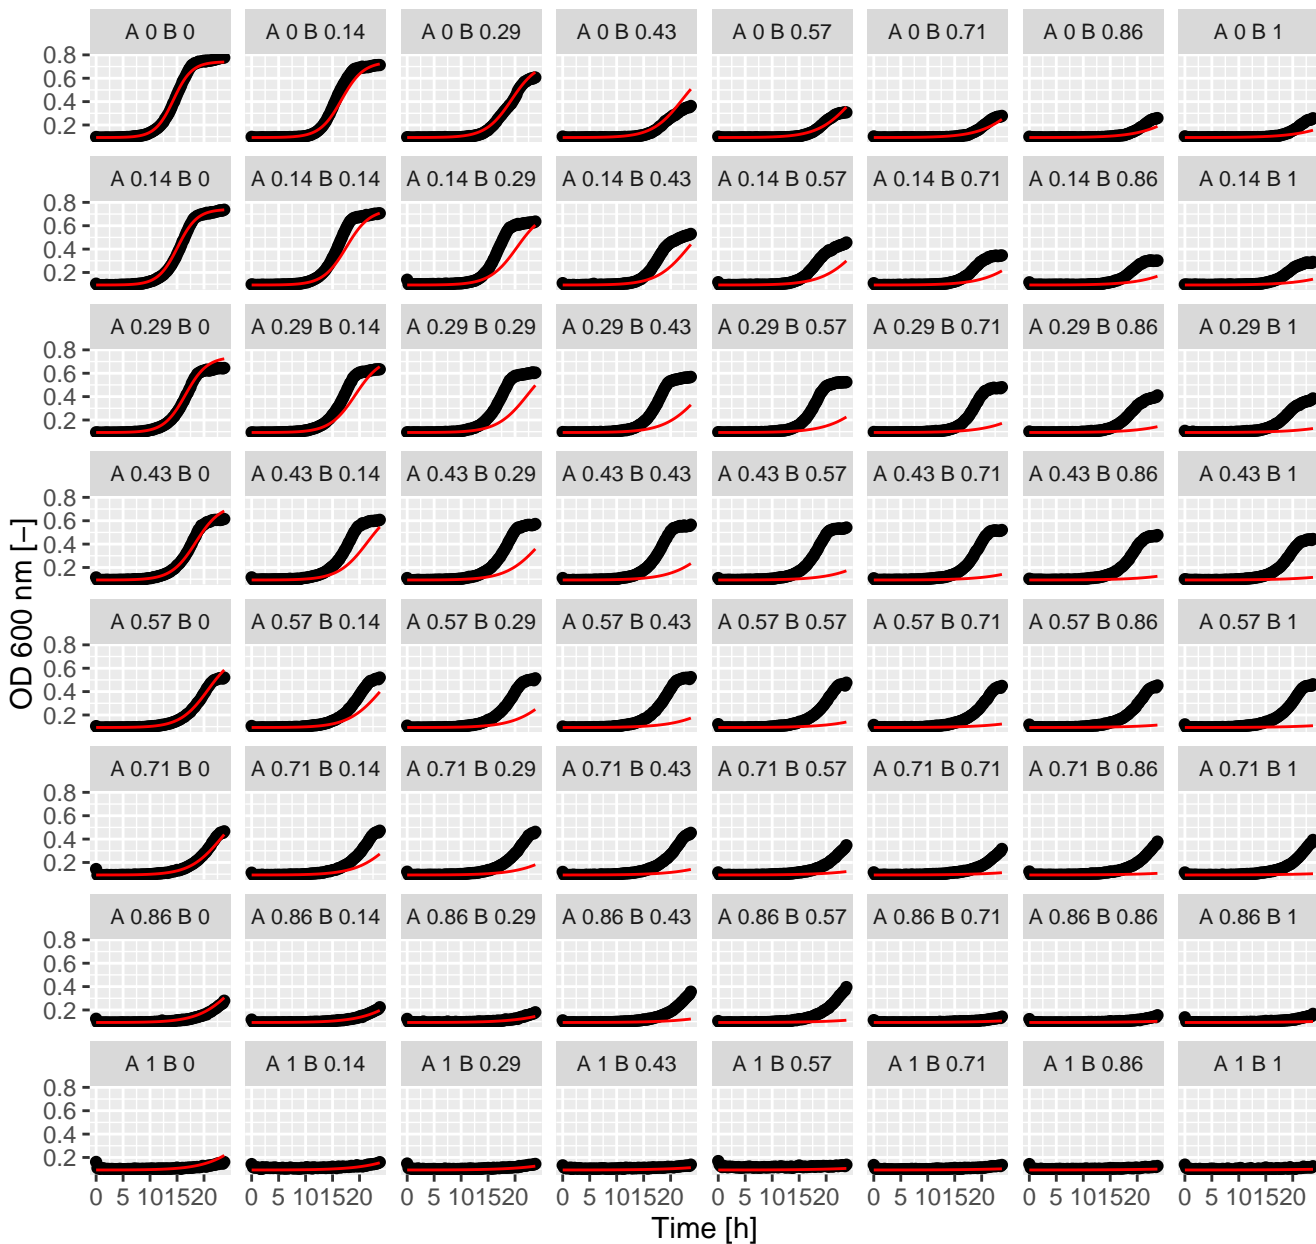

Chl.Ter (= Ax.Bx) full GPDI  
Int\_AB = 0.14 and Int\_BA = 5.75 at EC50

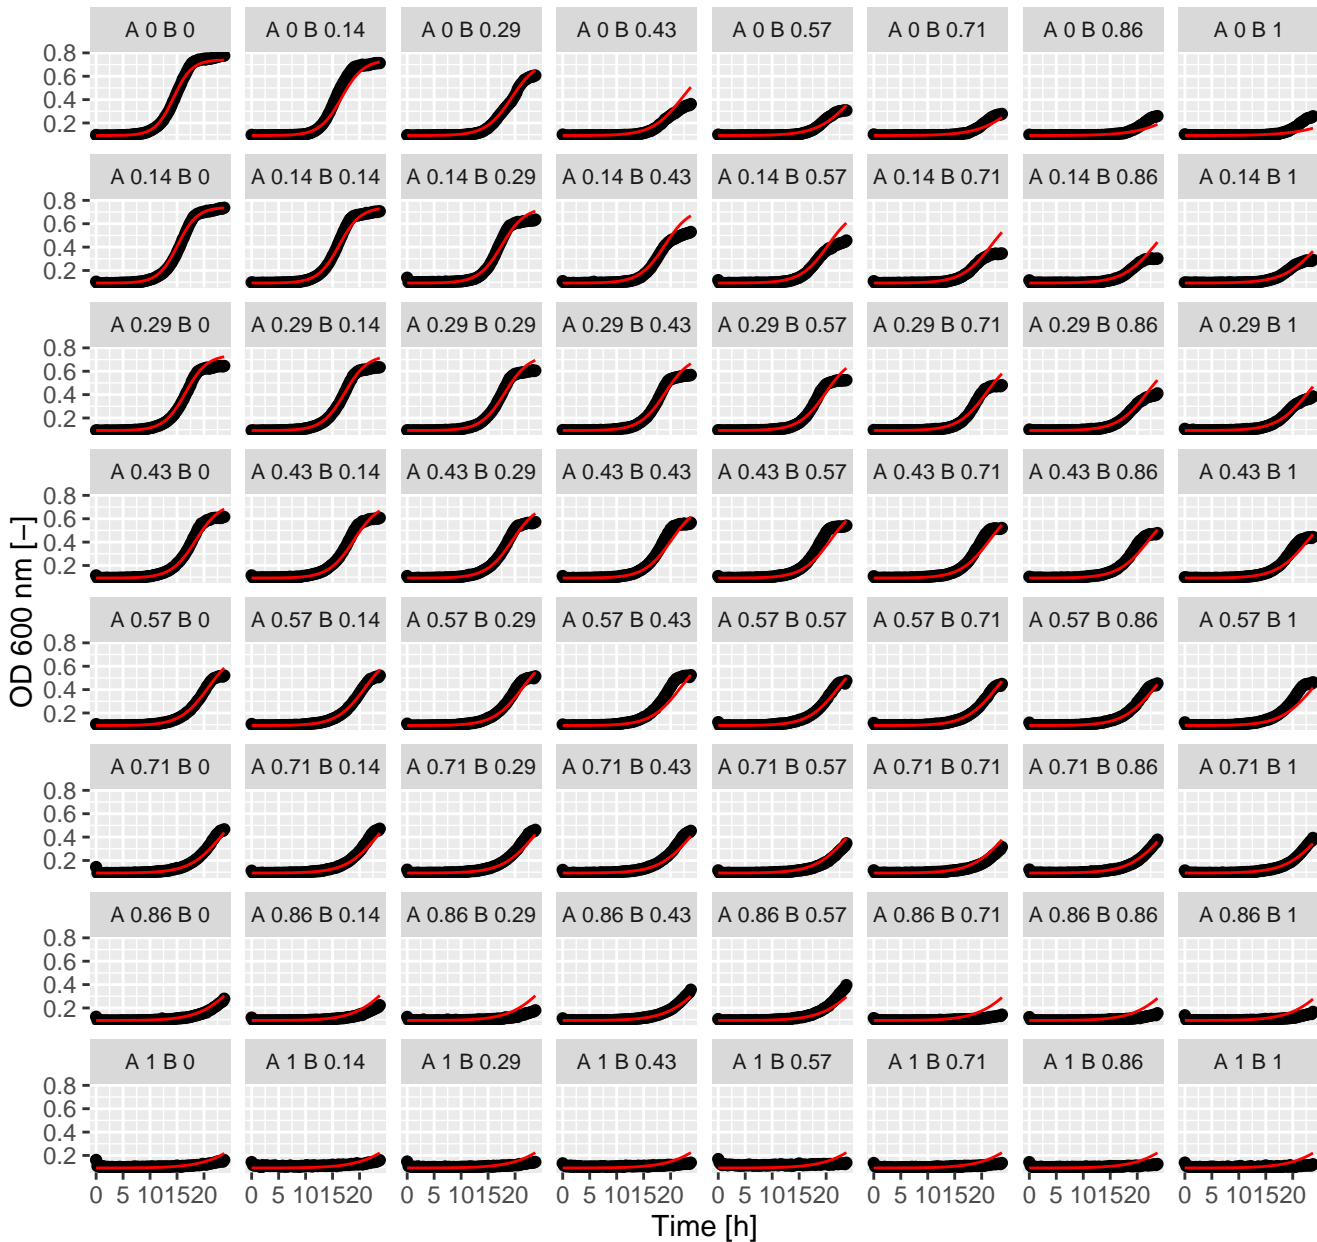

Chl.Tac (= Ax.Bx) exp. additivity (BI)  
Int\_AB = 0 and Int\_BA = 0 at EC50

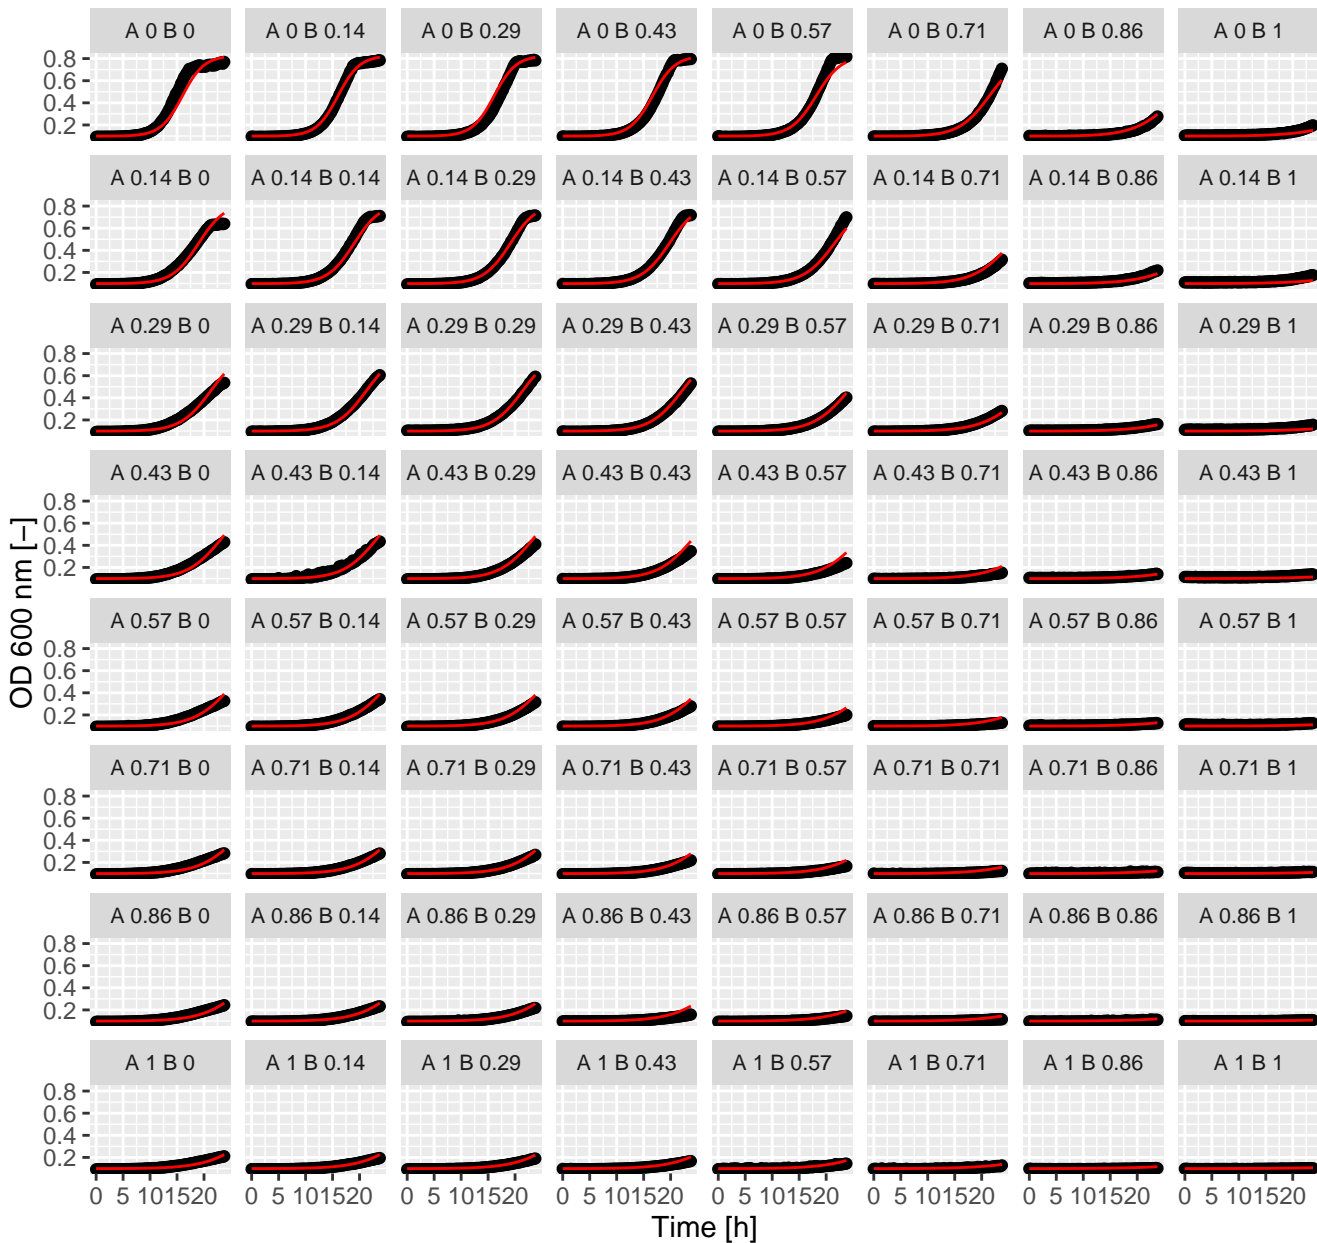

Chl.Tac (= Ax.Bx) full GPDI  
Int\_AB = -0.07 and Int\_BA = -0.1 at EC50

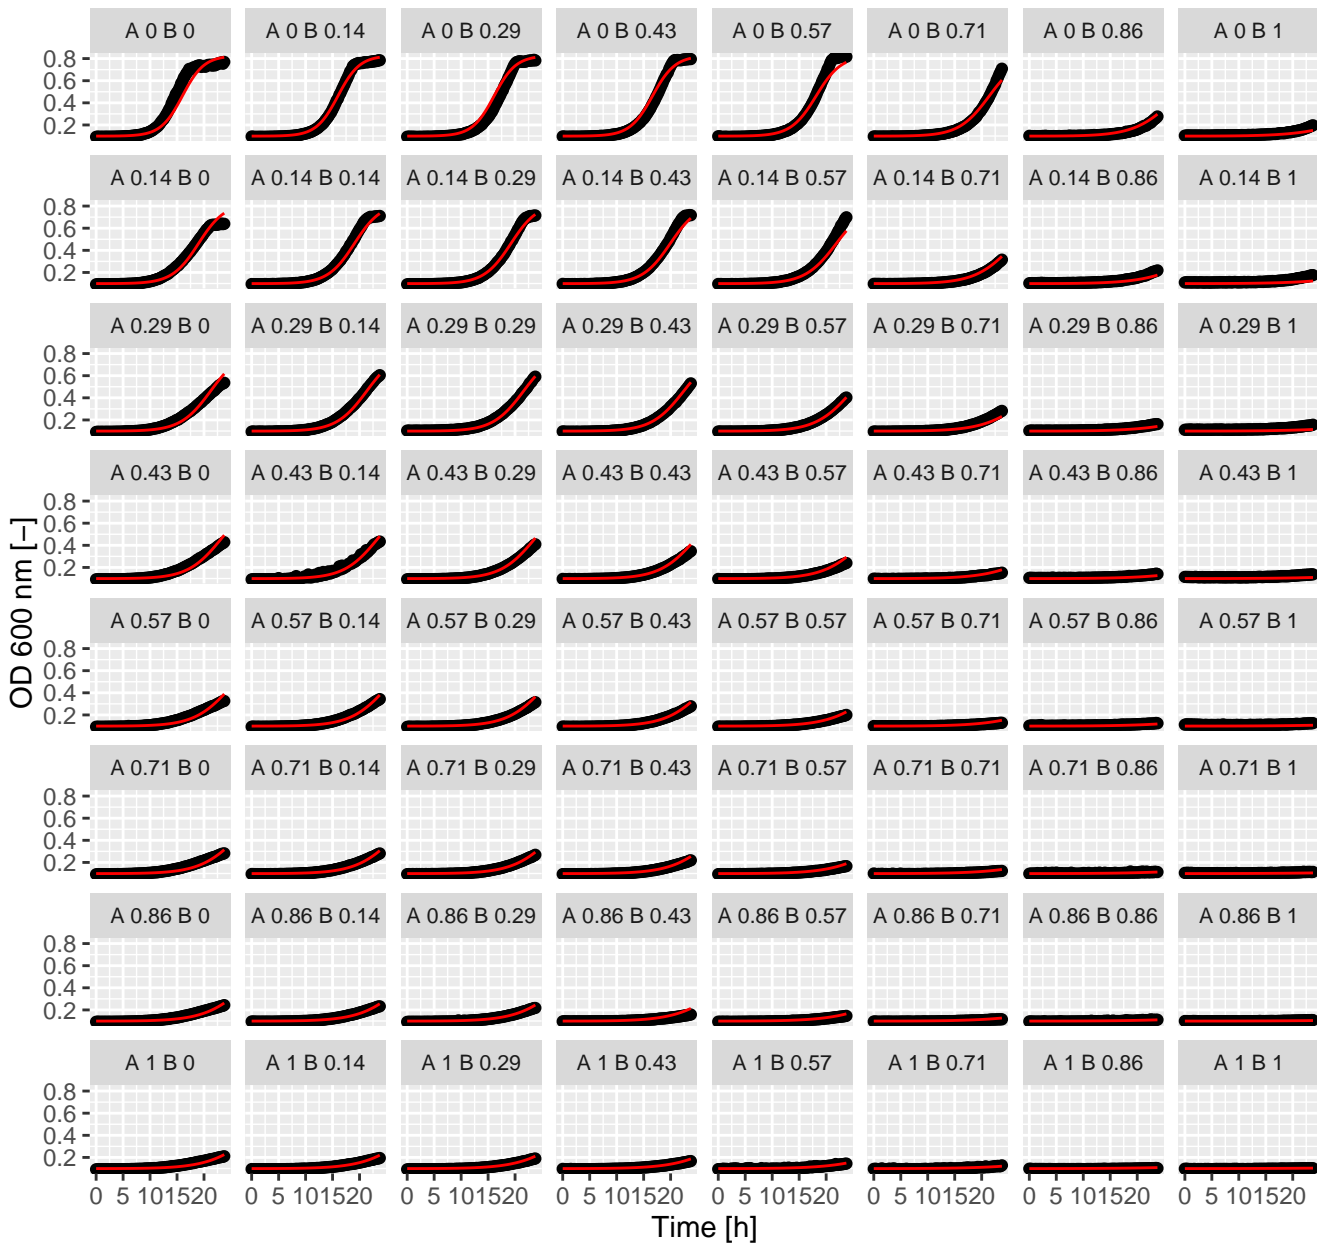

Chl.Sta (= Ax.Bx) exp. additivity (BI)  
Int\_AB = 0 and Int\_BA = 0 at EC50

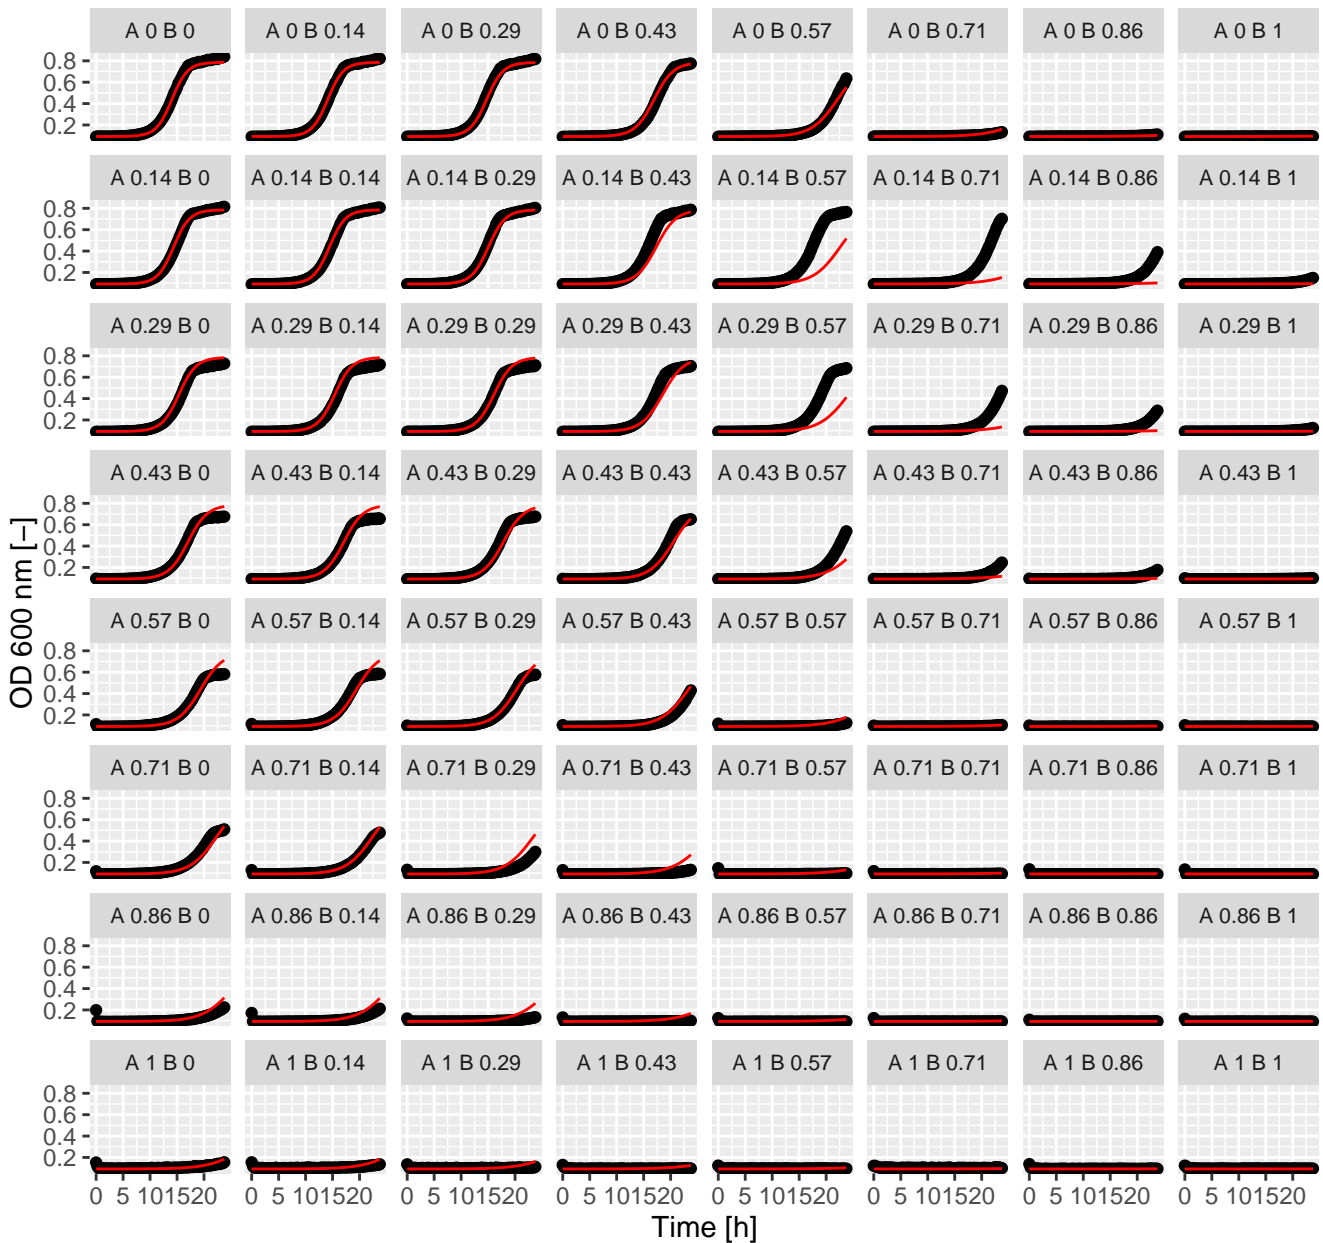

Chl.Sta (= Ax.Bx) full GPDI  
Int\_AB = -0.26 and Int\_BA = 0.36 at EC50

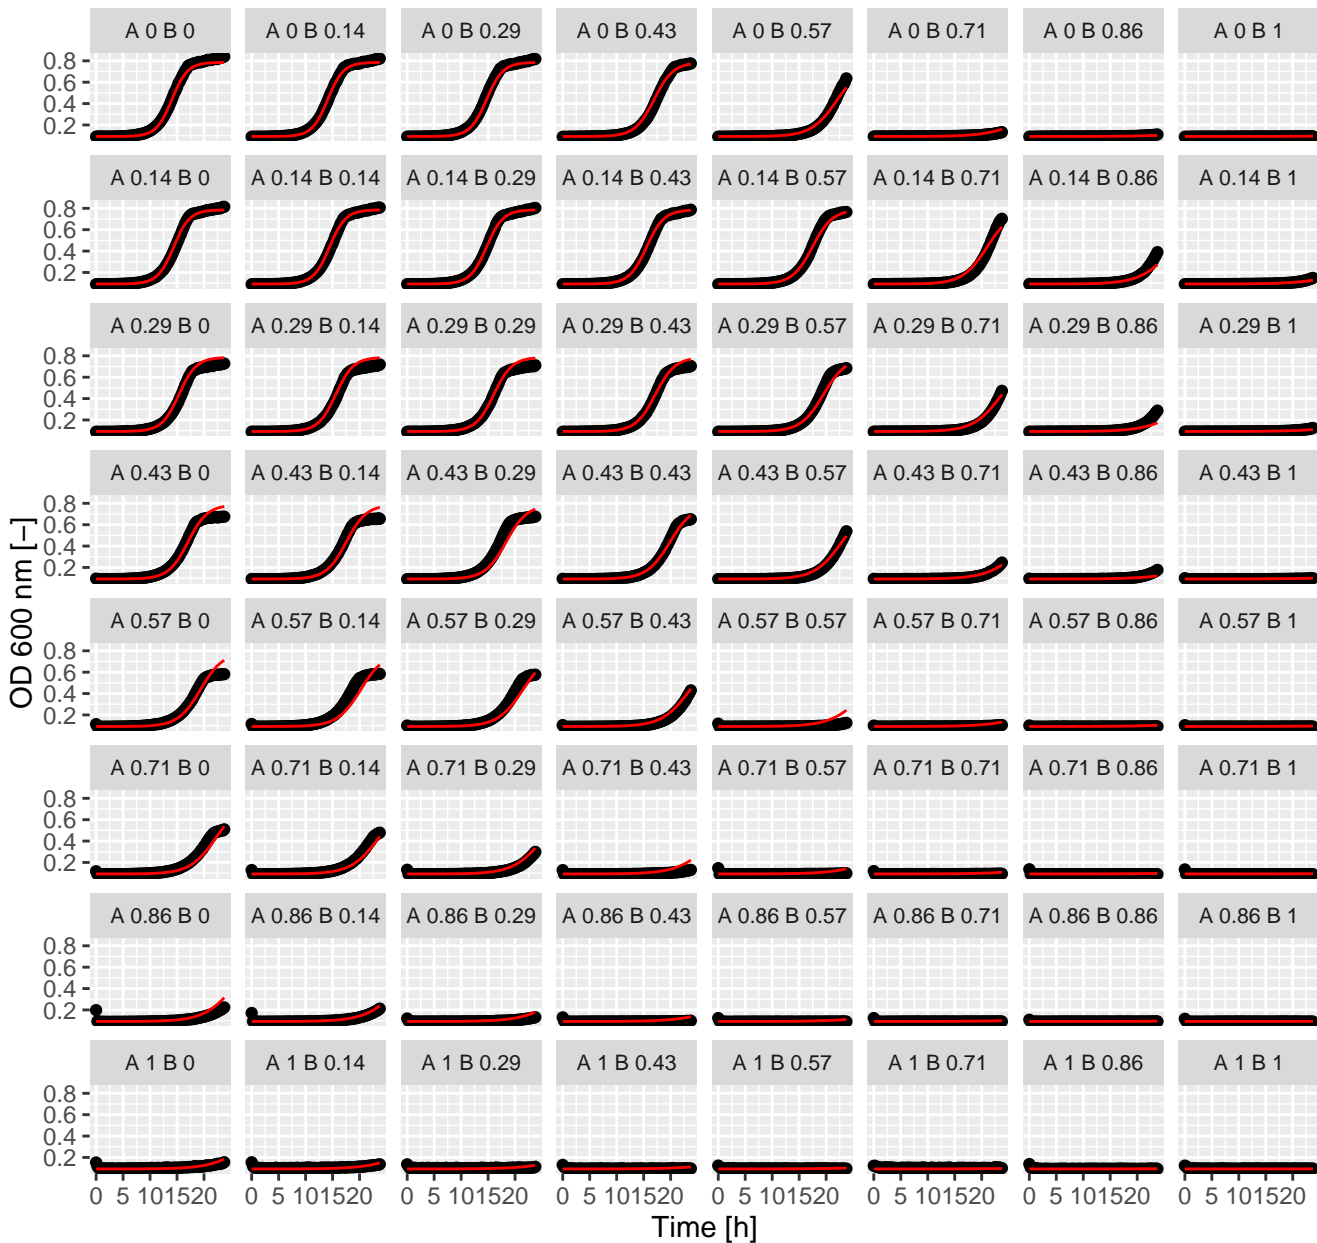

Chl.Pen (= Ax.Bx) exp. additivity (BI)  
Int\_AB = 0 and Int\_BA = 0 at EC50

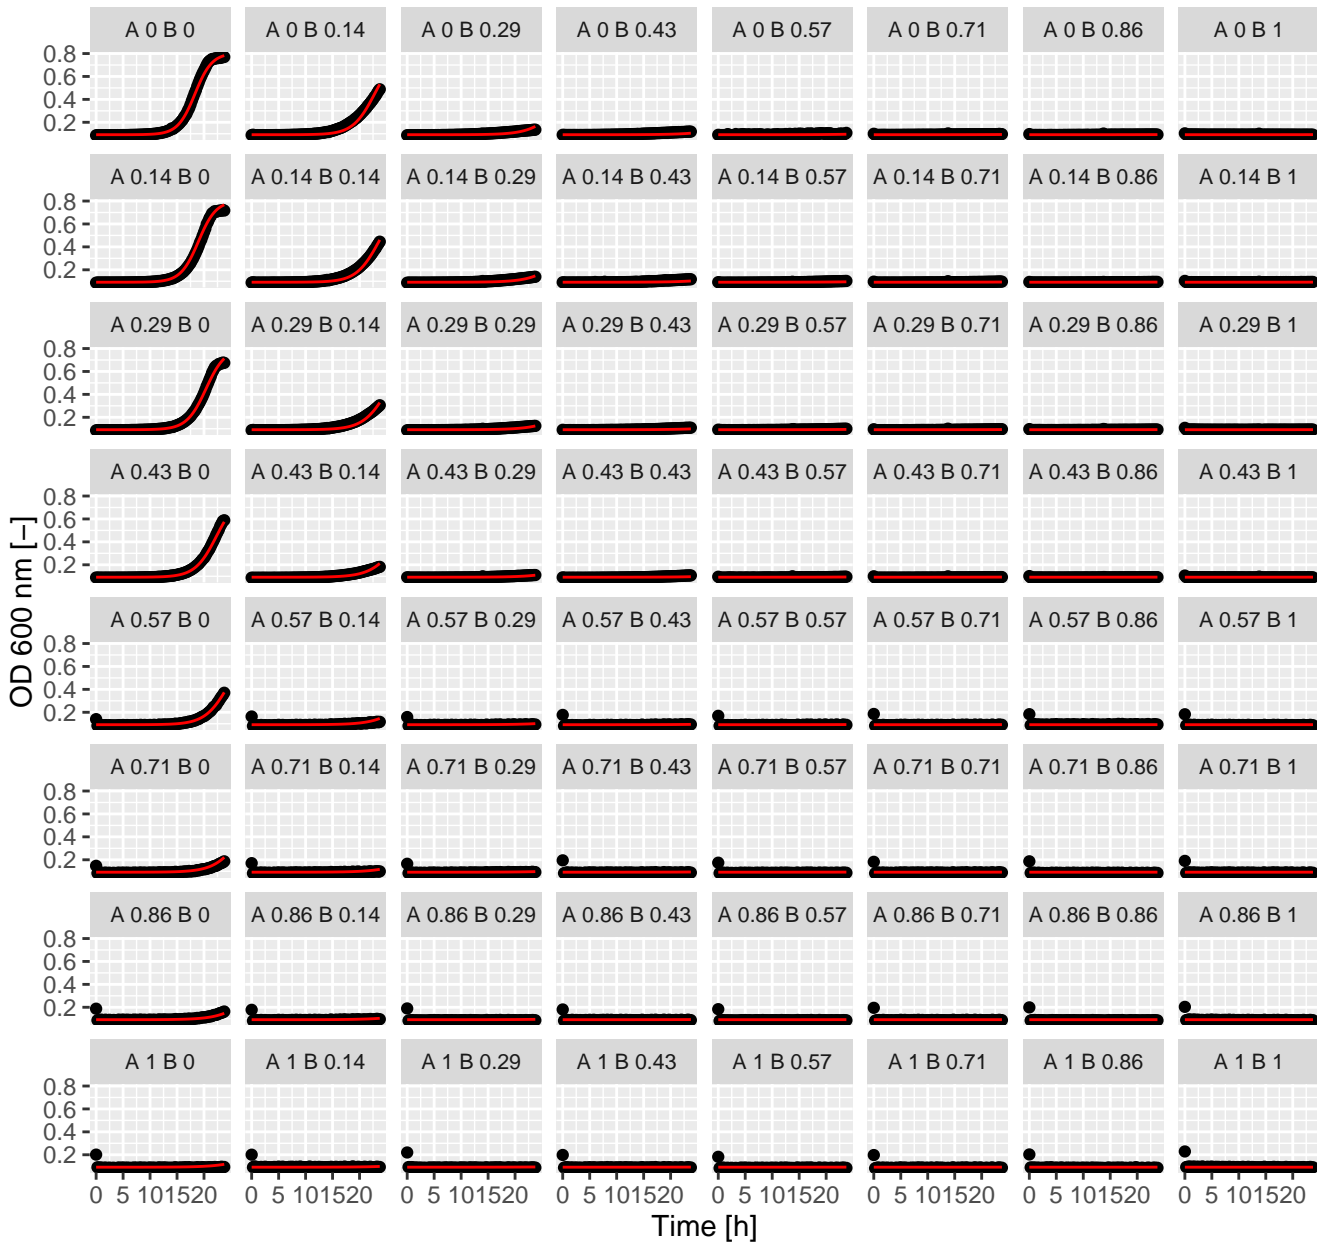

Chl.Pen (= Ax.Bx) full GPDI  
Int\_AB = -0.24 and Int\_BA = 0.44 at EC50

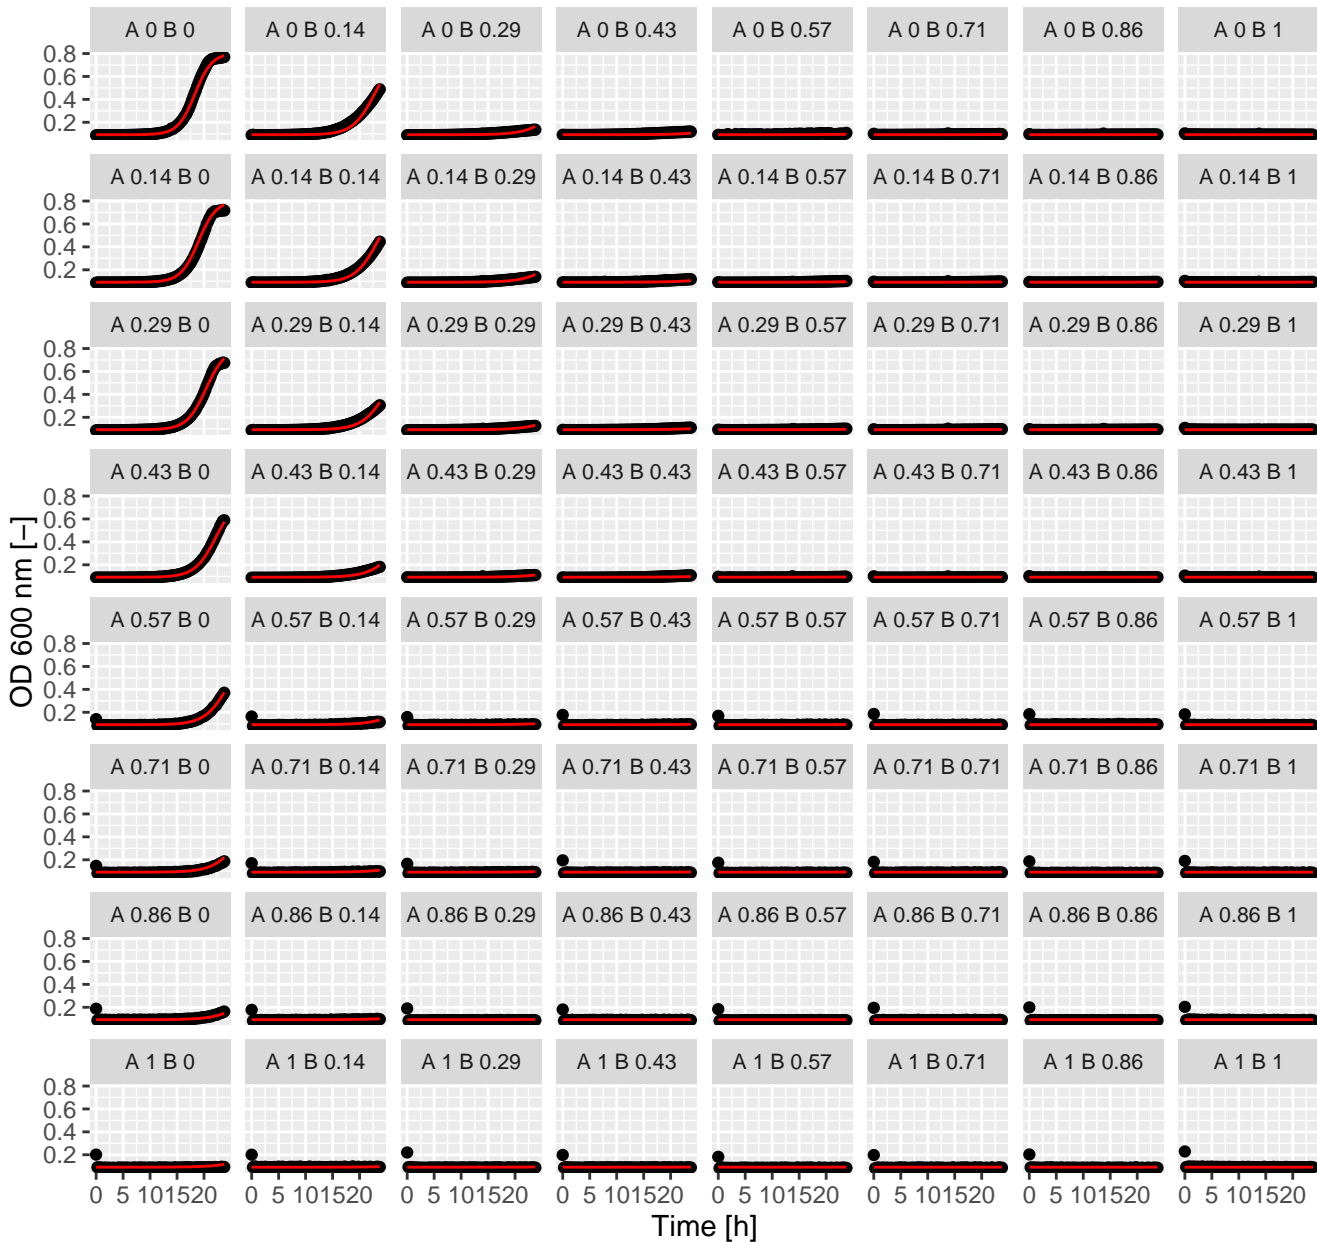



Chl.Lat (= Ax.Bx) exp. additivity (BI)  
Int\_AB = 0 and Int\_BA = 0 at EC50

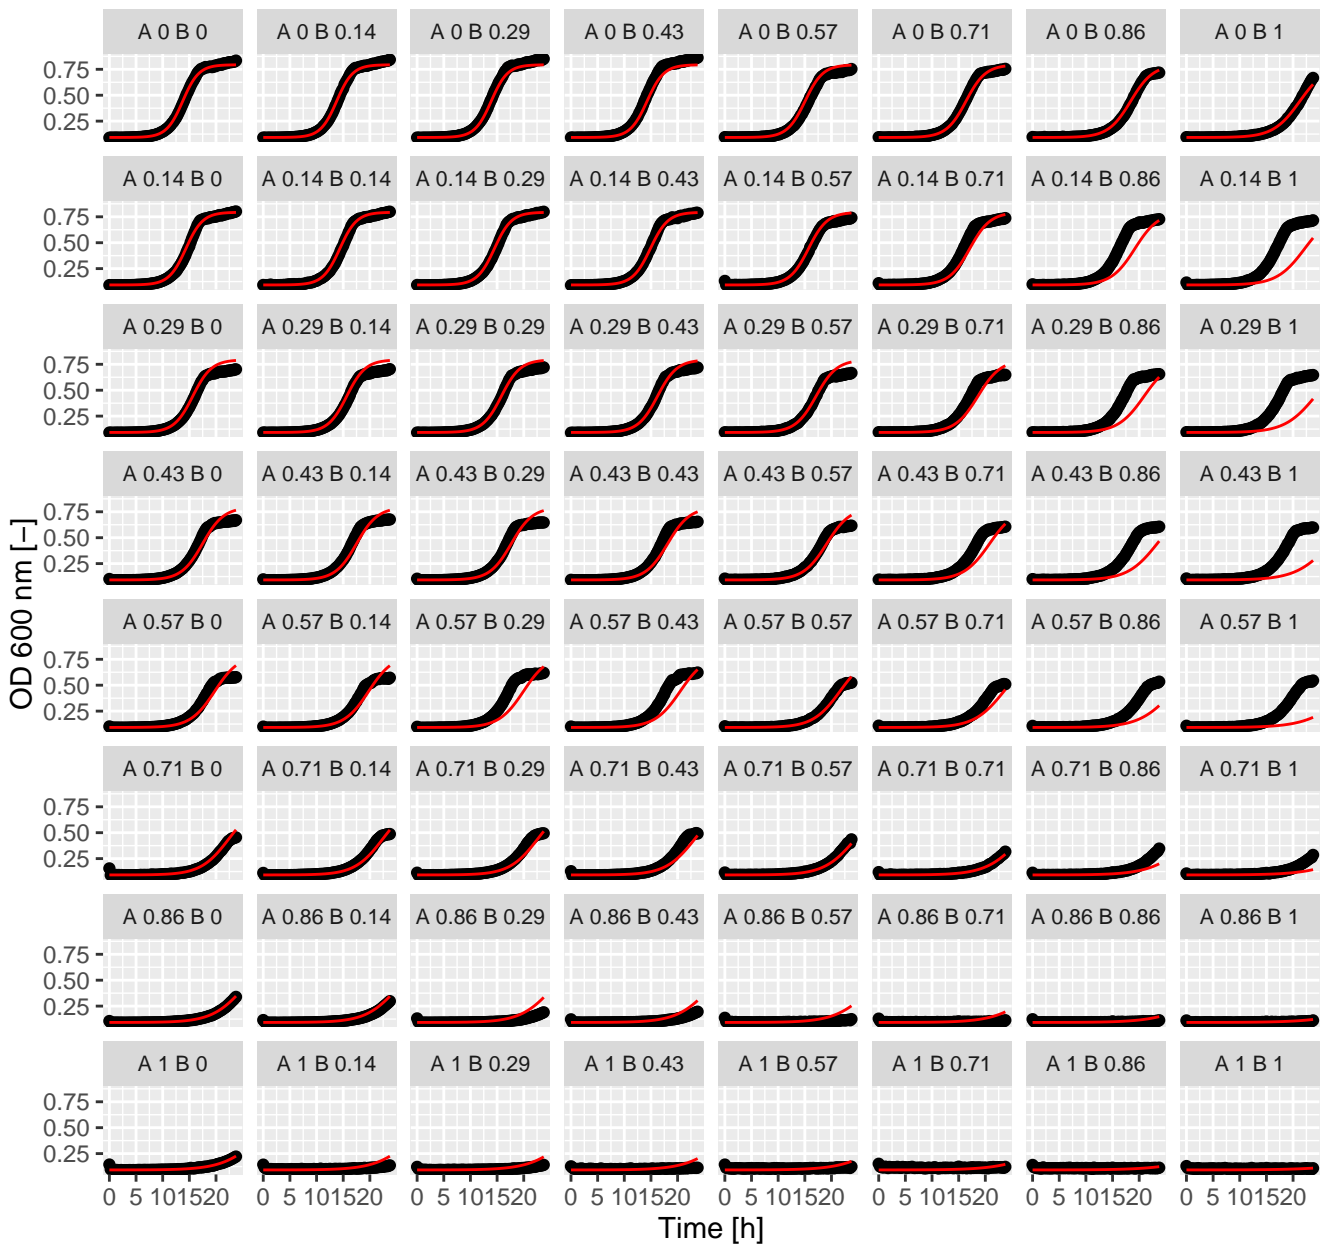

Chl.Lat (= Ax.Bx) full GPDI  
Int\_AB = -0.17 and Int\_BA = 1.92 at EC50

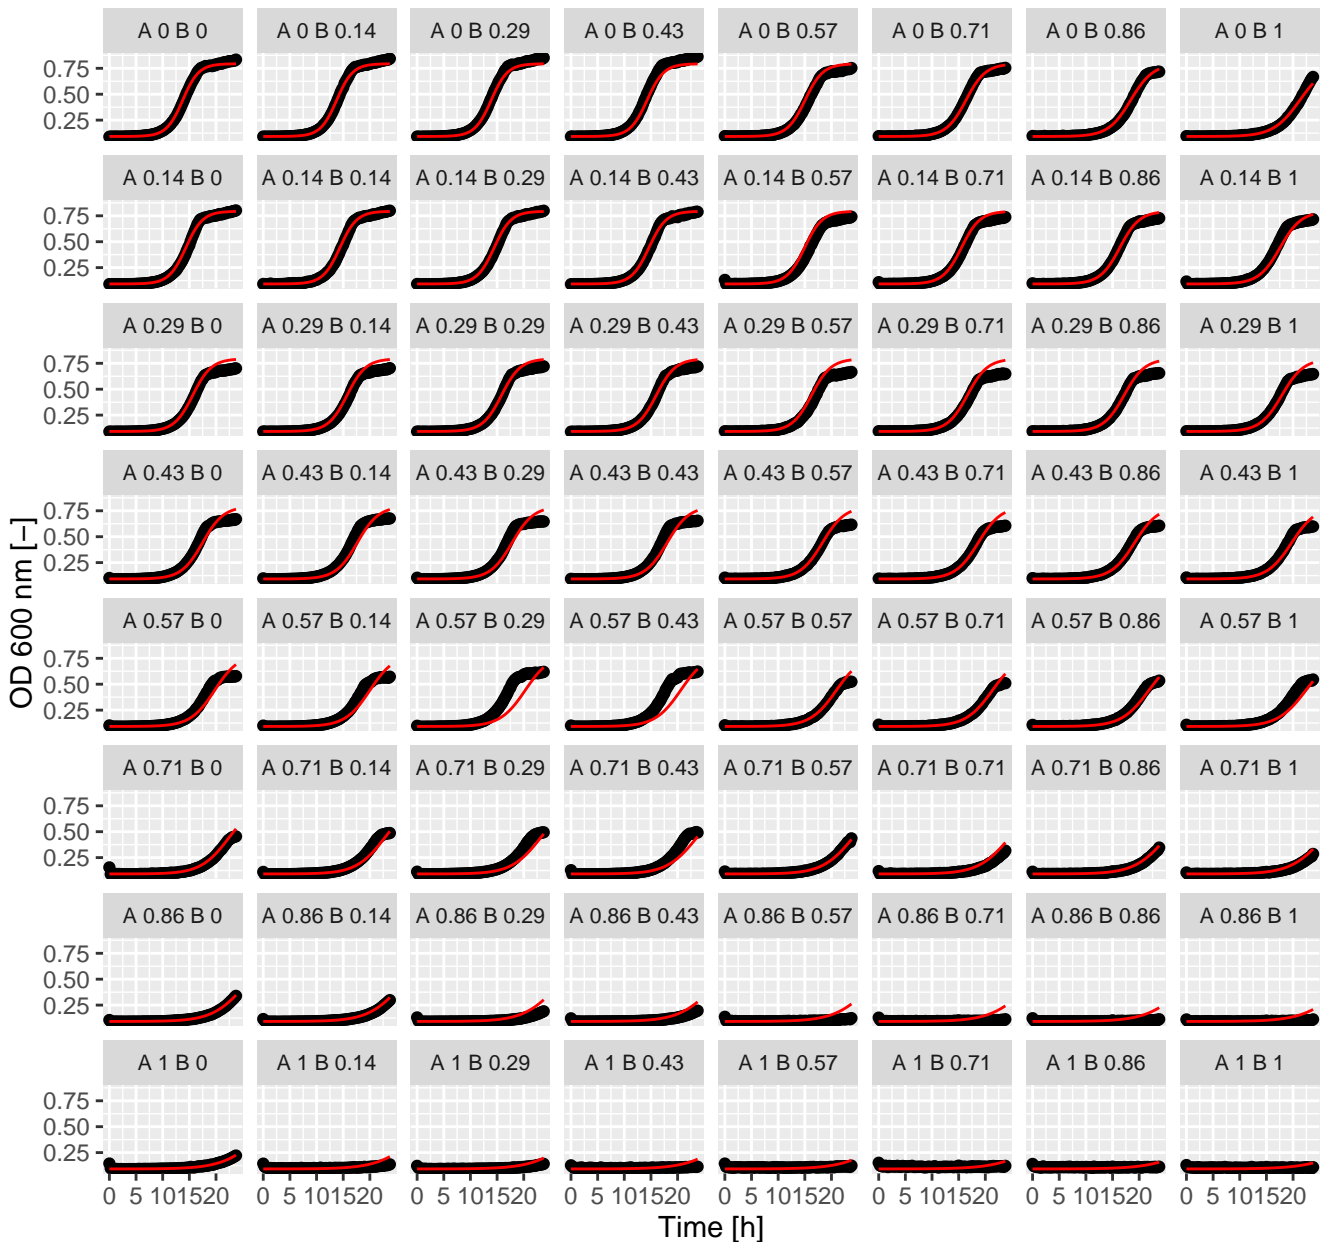

Chl.Chl (= Ax.Bx) exp. additivity (BI)  
Int\_AB = 0 and Int\_BA = 0 at EC50

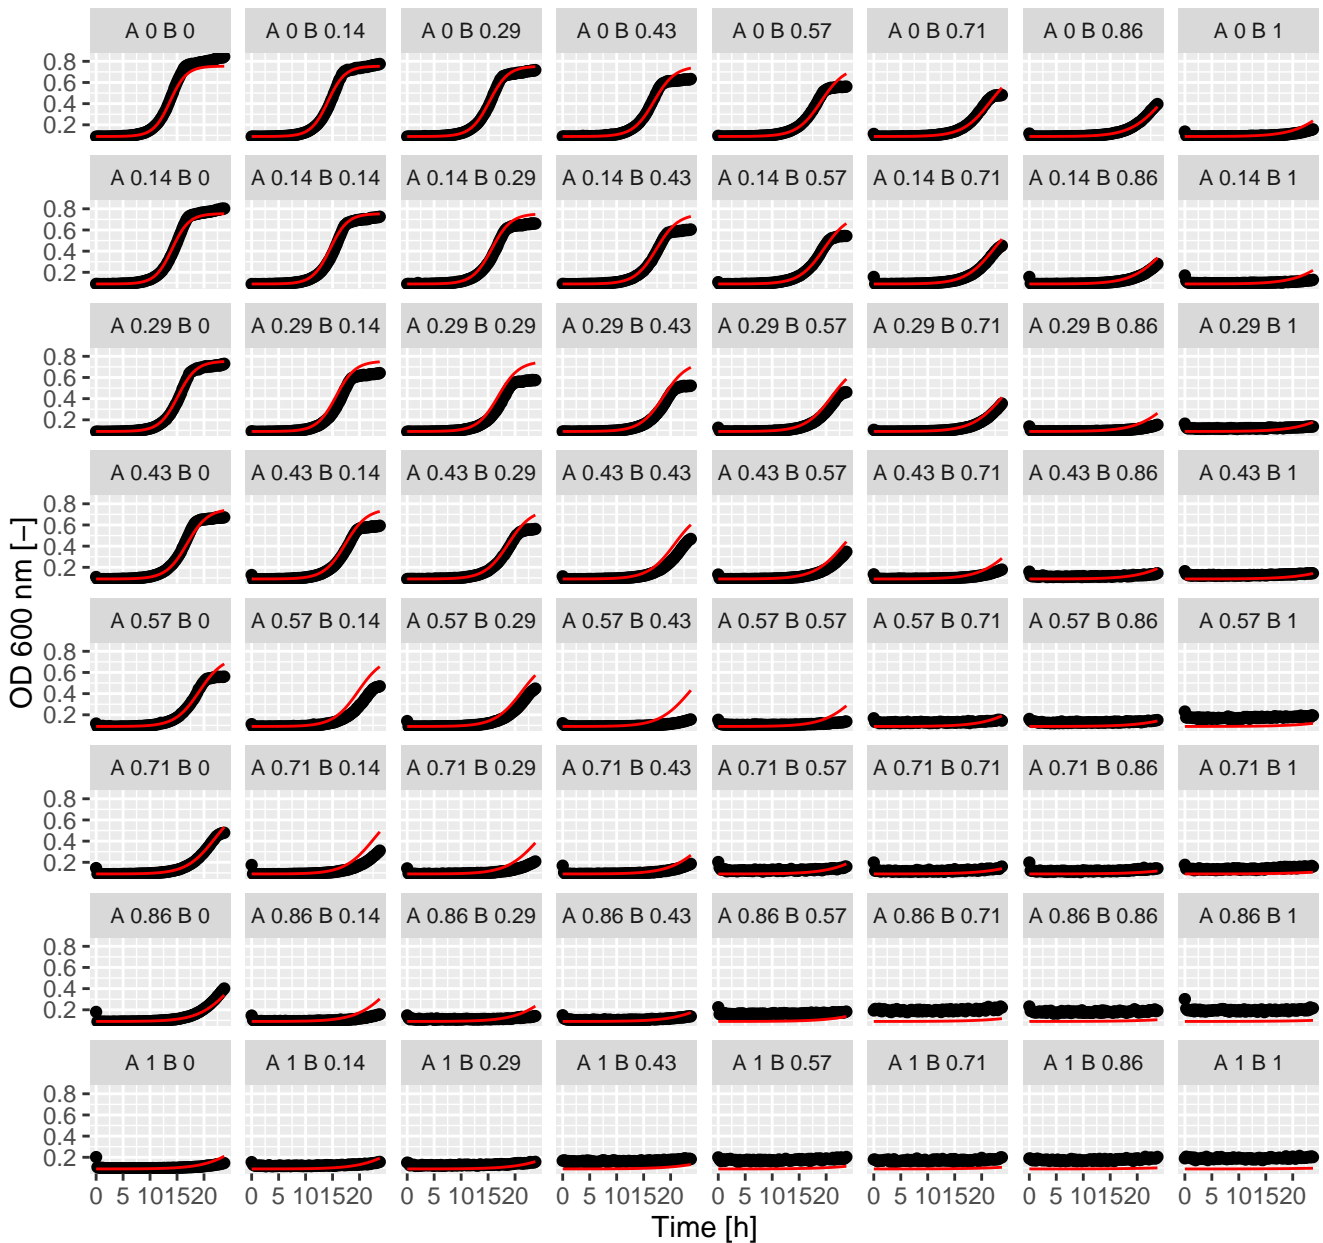

Chl.Chl (= Ax.Bx) full GPDI  
Int\_AB = -0.16 and Int\_BA = -0.06 at EC50

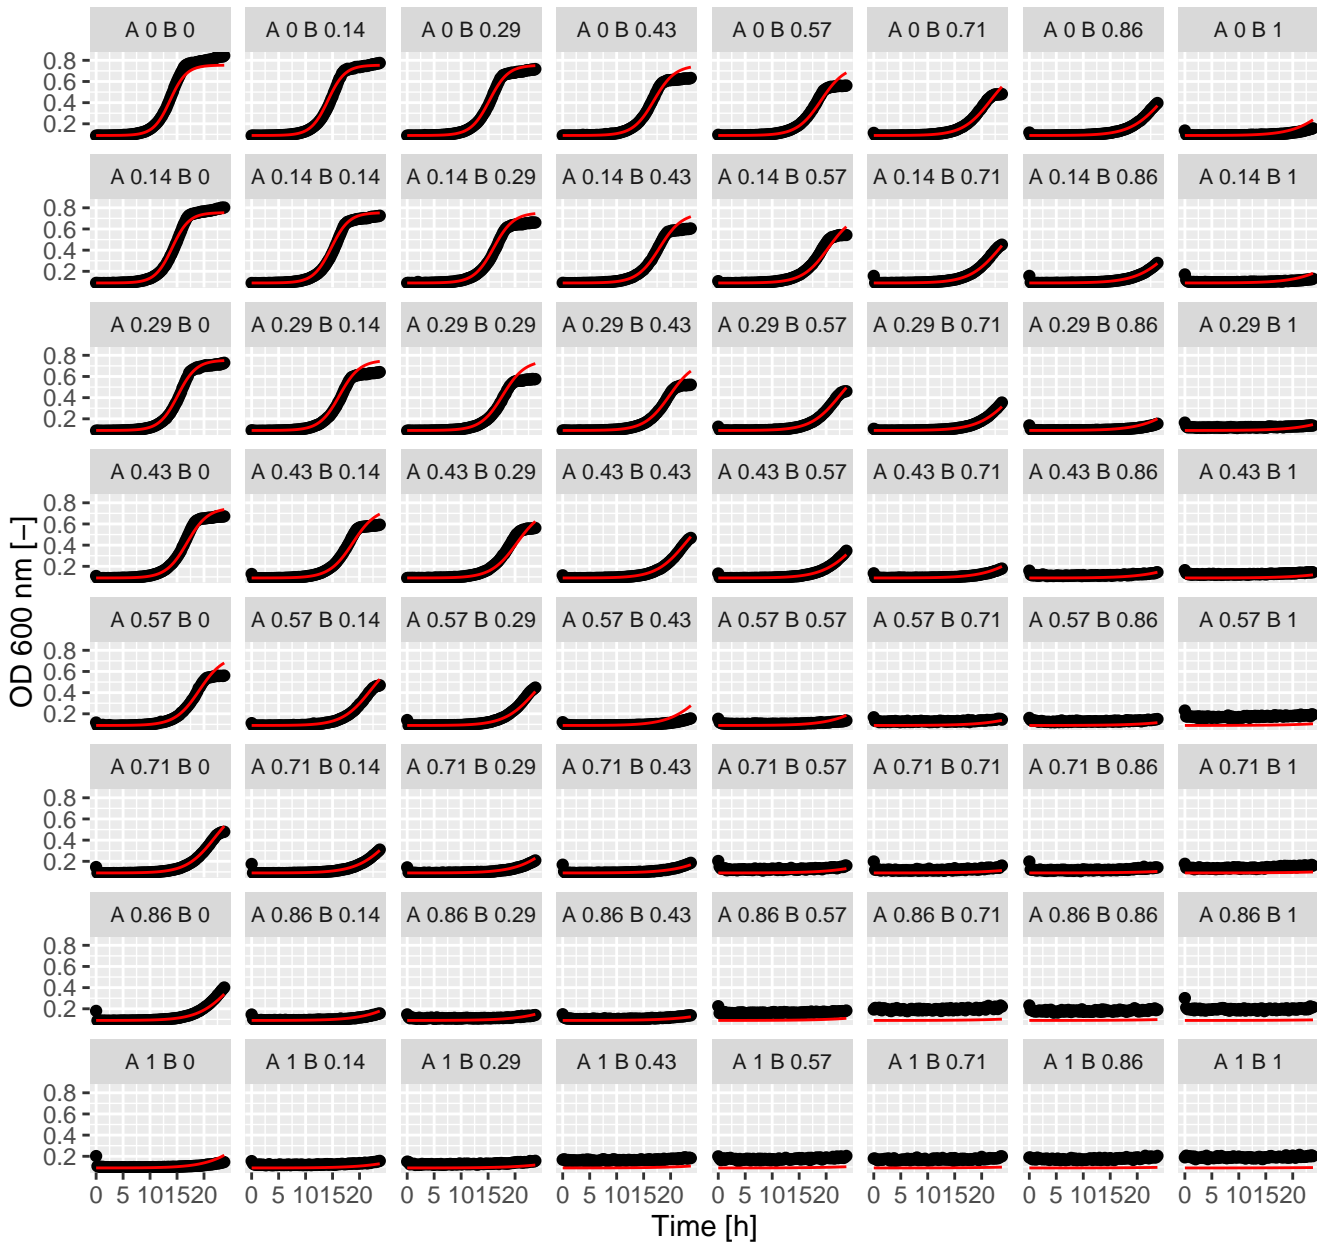

Can.Ter (= Ax.Bx) exp. additivity (BI)  
Int\_AB = 0 and Int\_BA = 0 at EC50

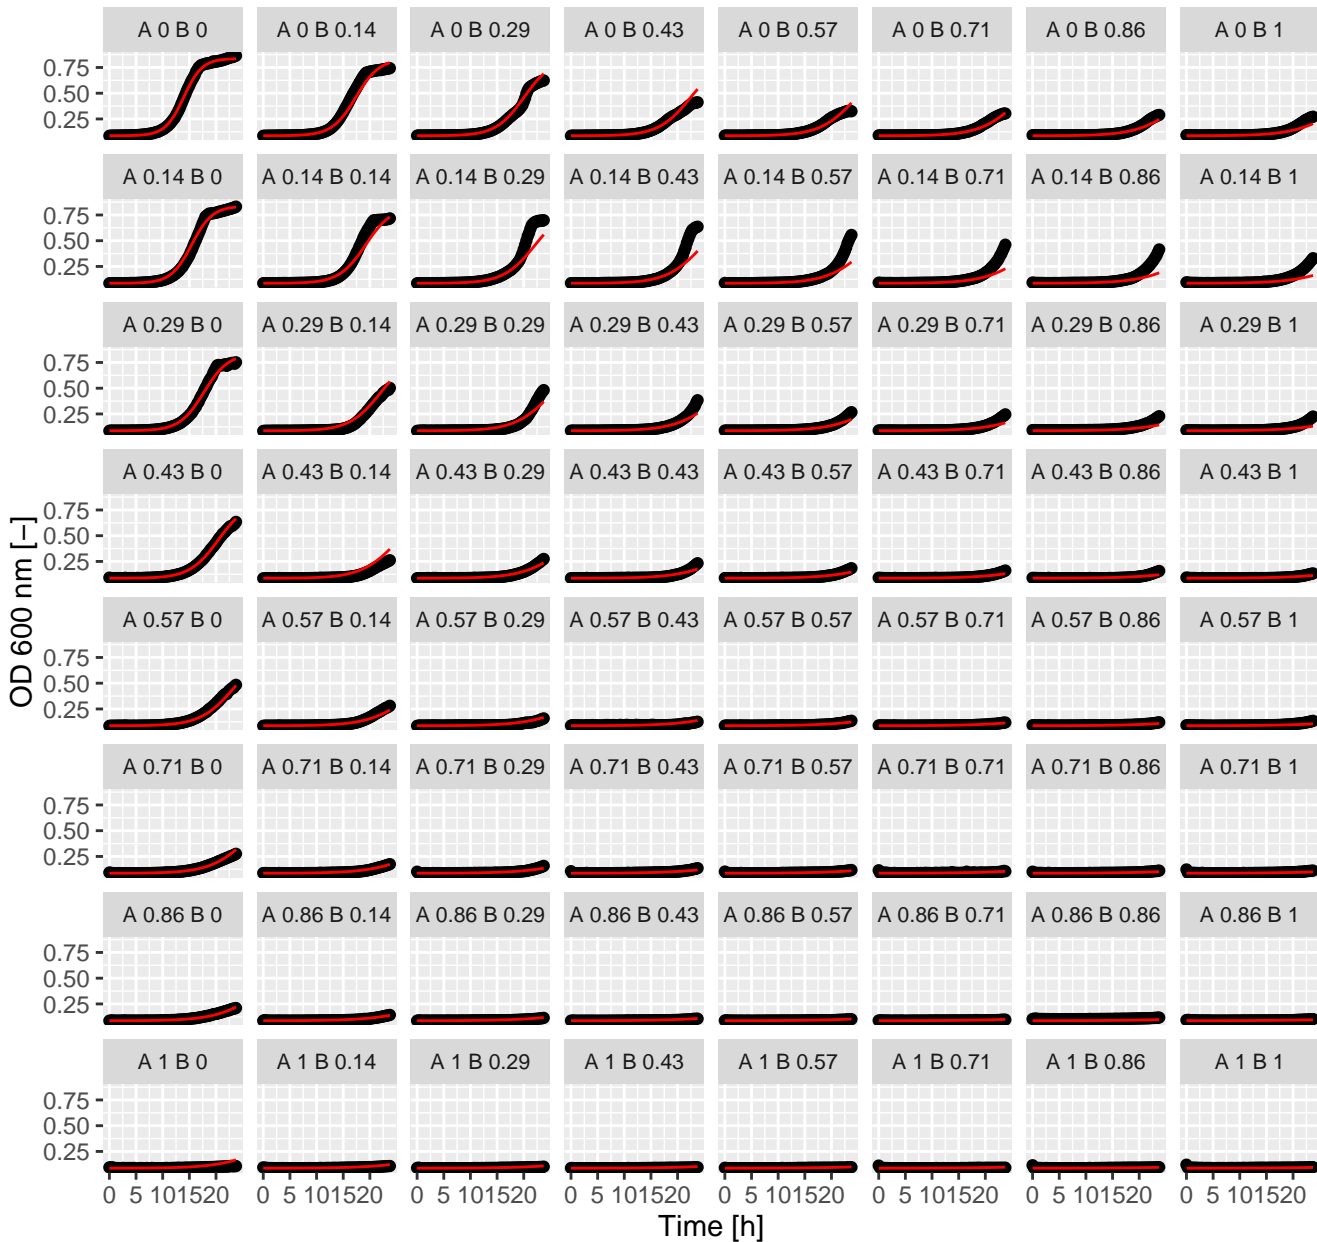

Can.Ter (= Ax.Bx) full GPDI  
Int\_AB = -0.26 and Int\_BA = 0.9 at EC50

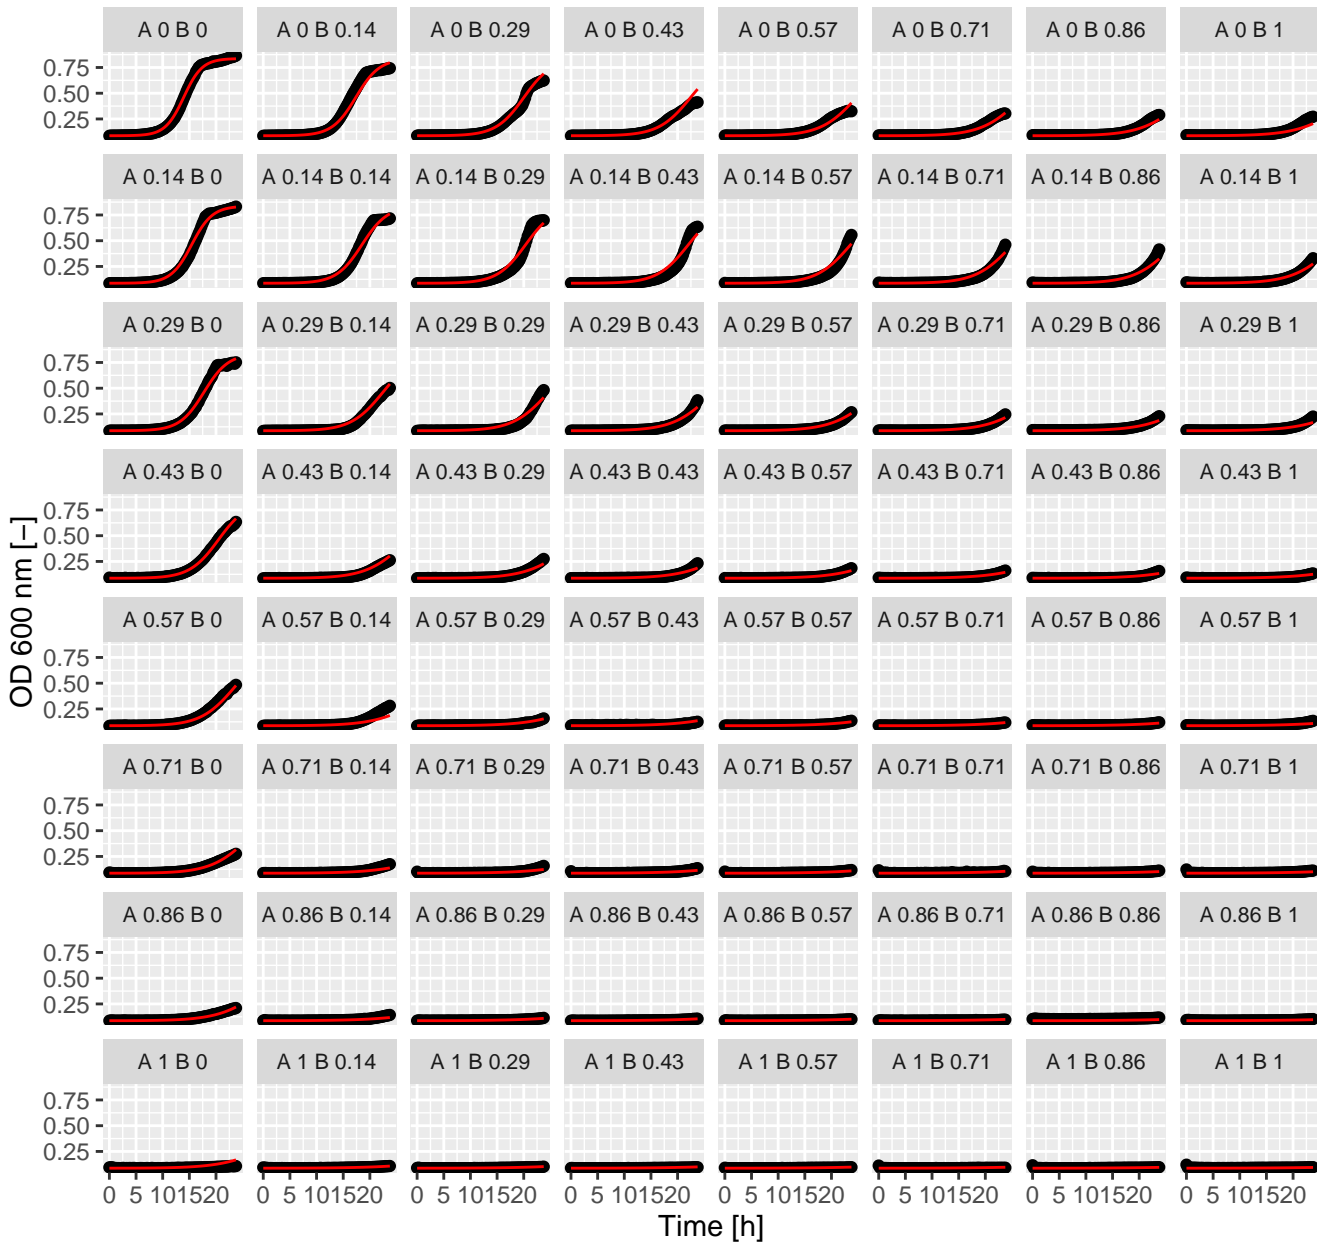

Can.Tac (= Ax.Bx) exp. additivity (BI)  
Int\_AB = 0 and Int\_BA = 0 at EC50

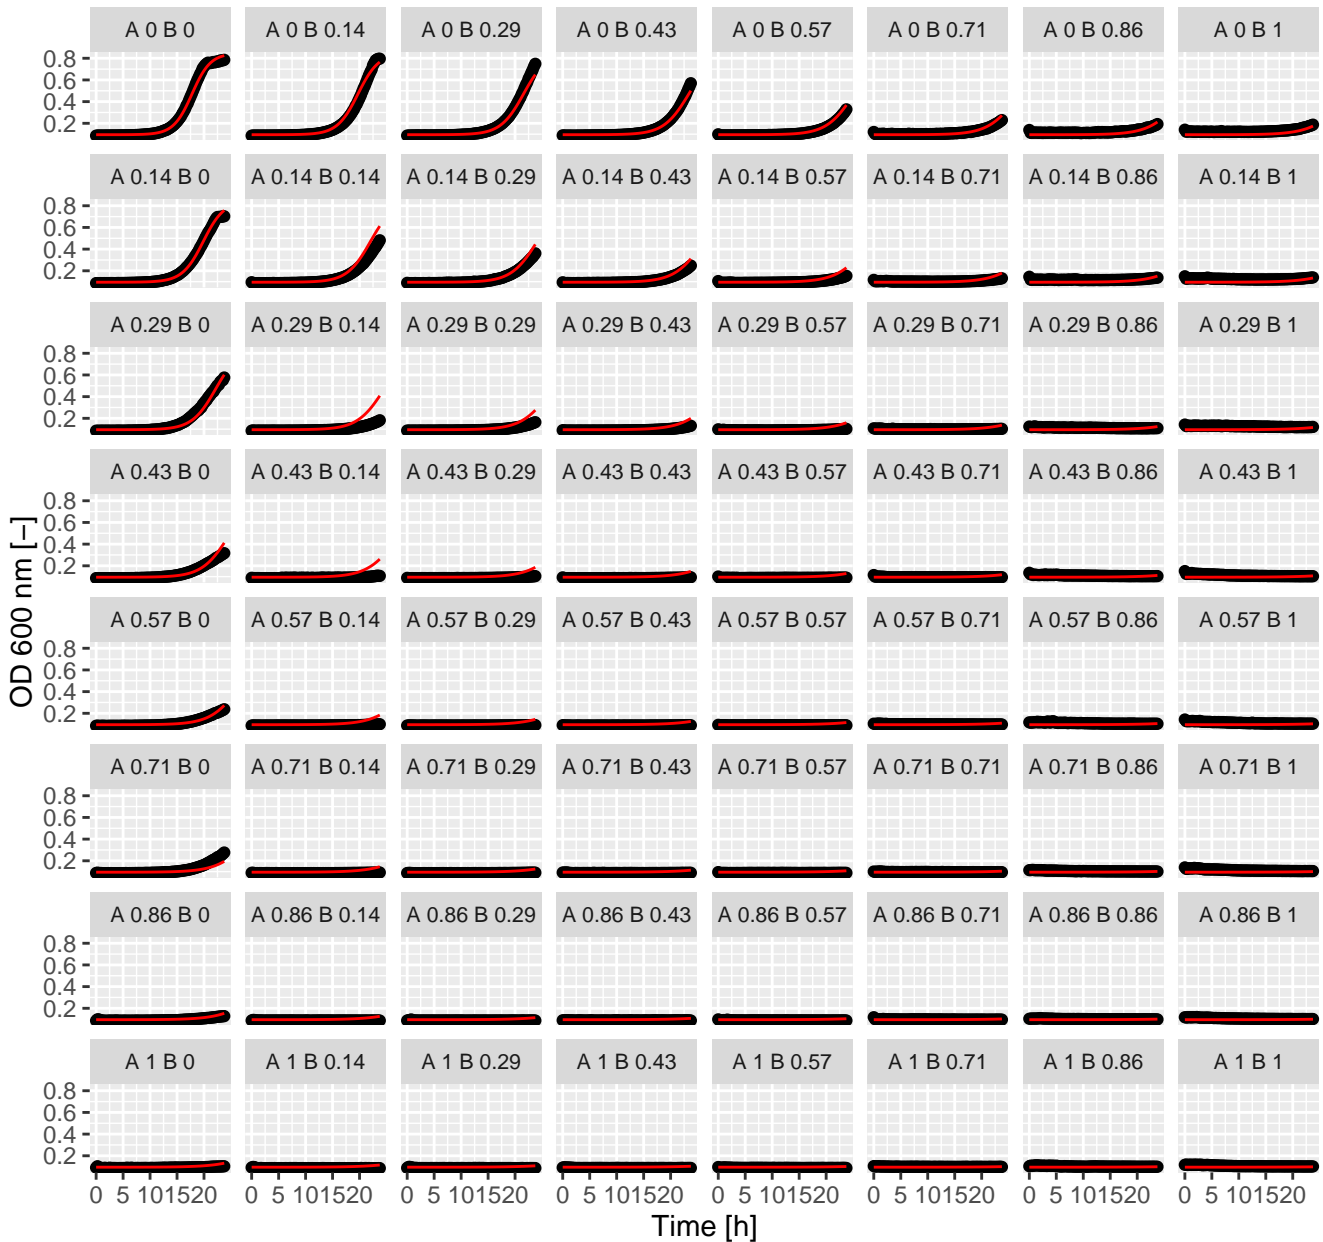

Can.Tac (= Ax.Bx) full GPDI  
Int\_AB = -0.82 and Int\_BA = 6.88 at EC50

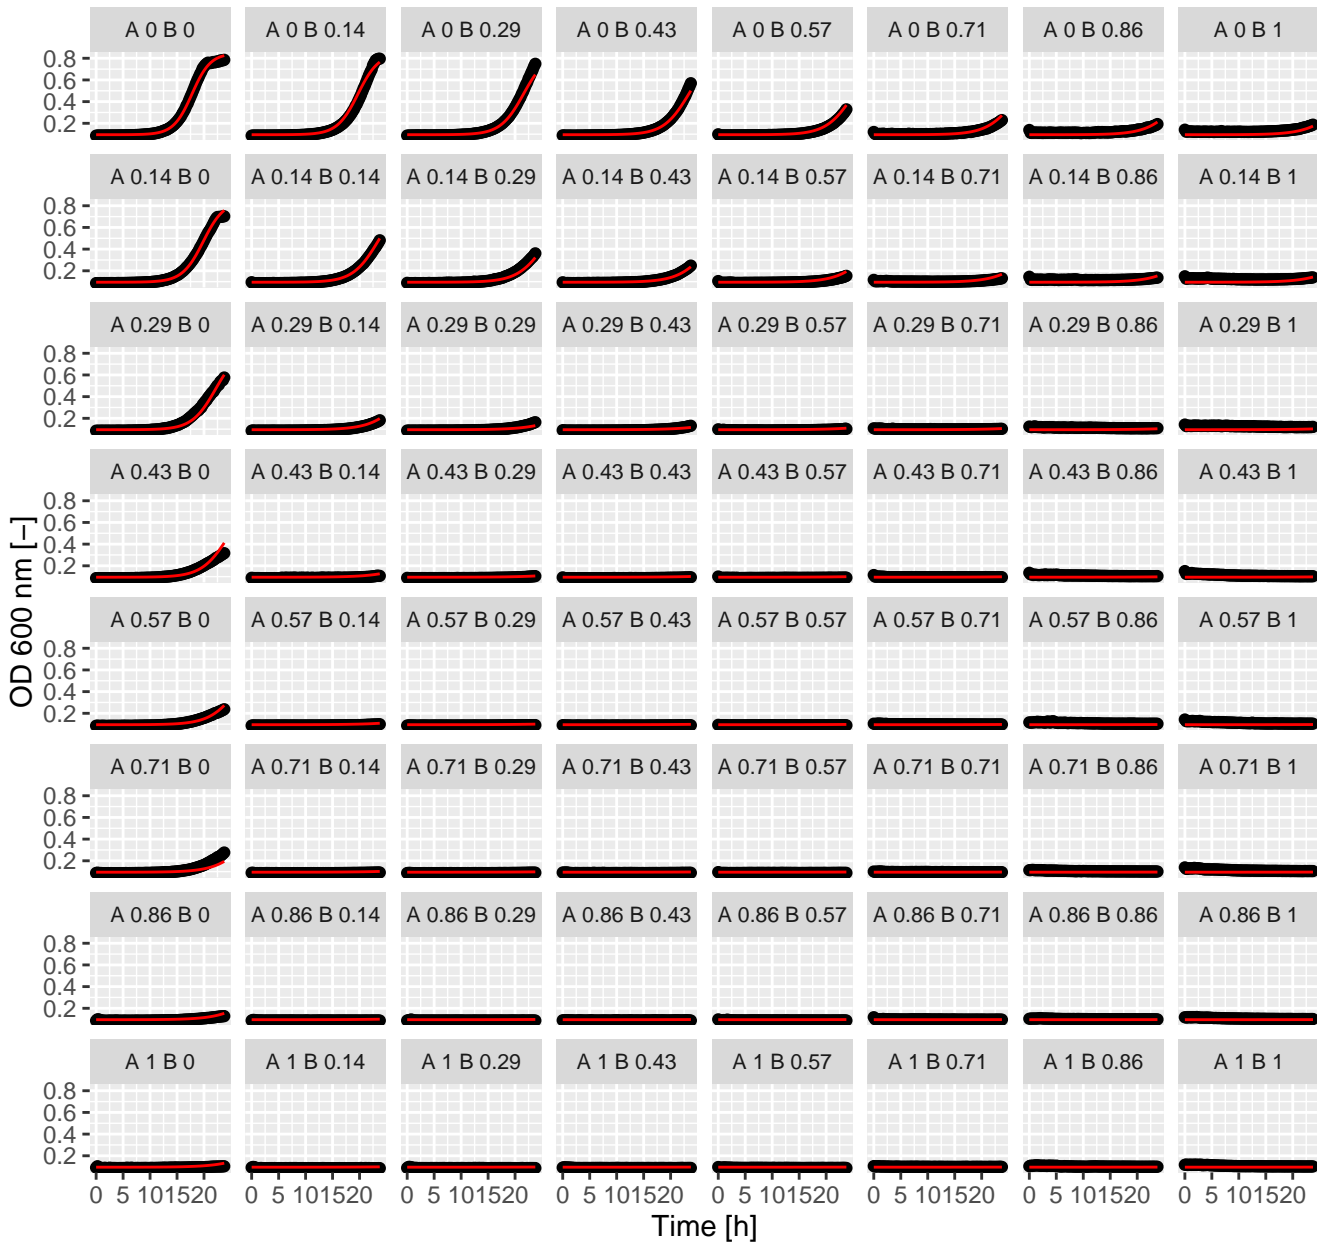



Can.Sta (= Ax.Bx) exp. additivity (BI)  
Int\_AB = 0 and Int\_BA = 0 at EC50

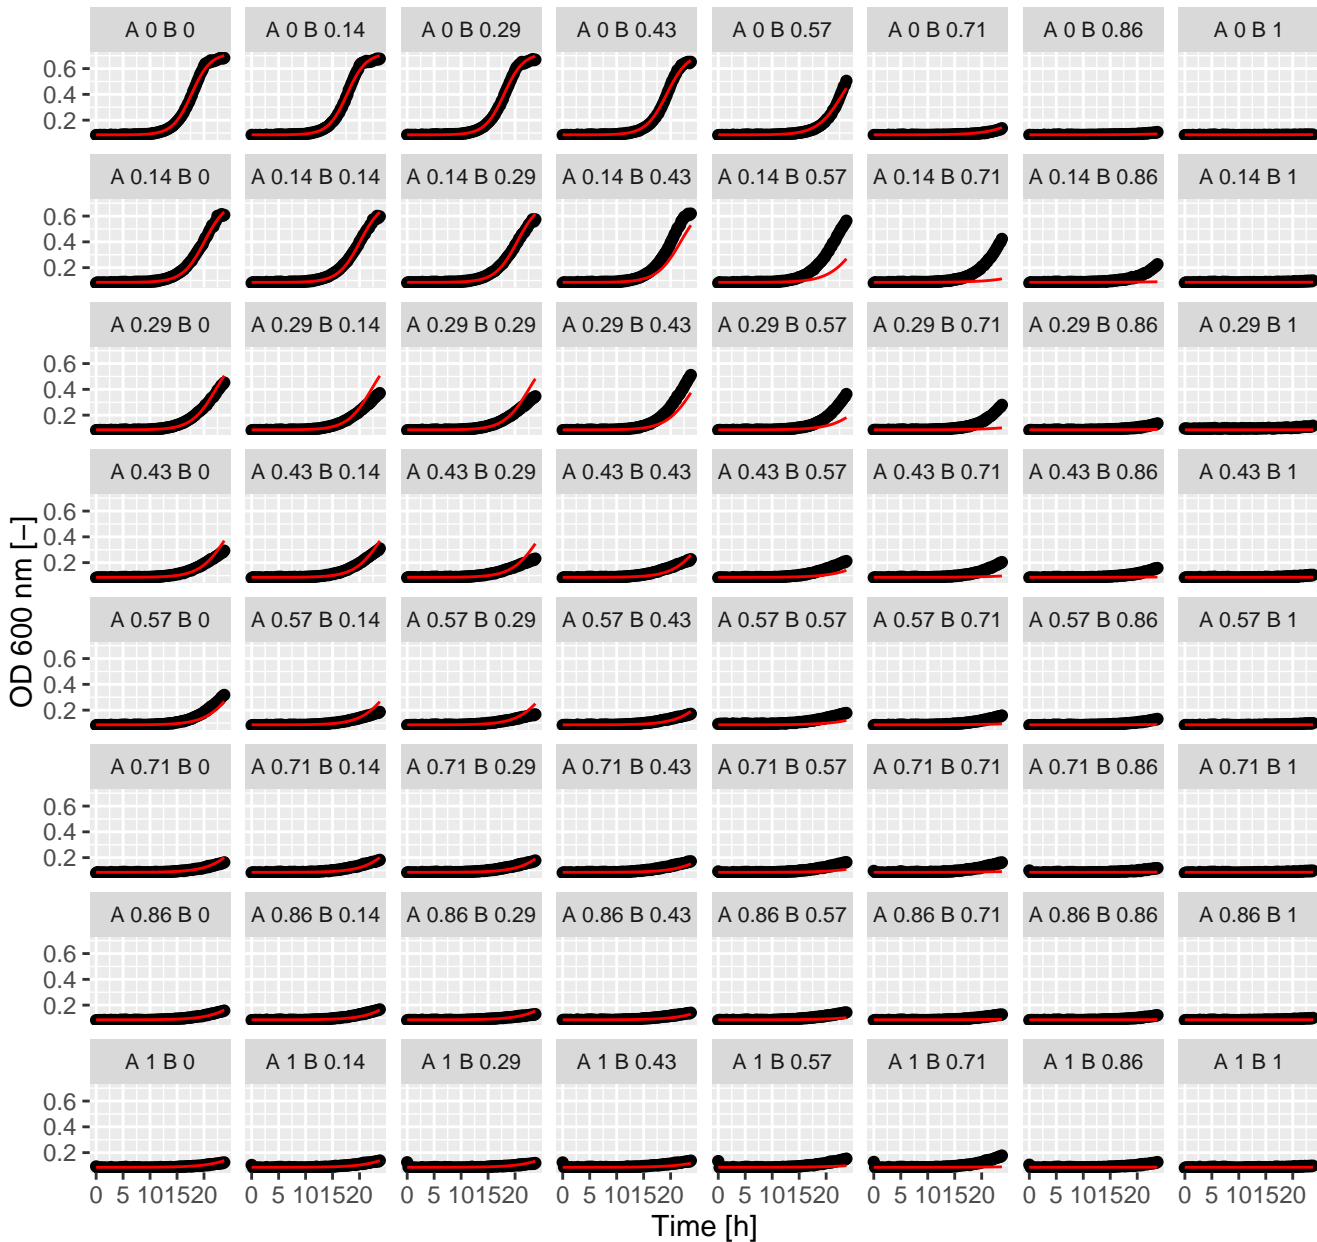

Can.Sta (= Ax.Bx) full GPDI  
Int\_AB = -0.12 and Int\_BA = 0.64 at EC50

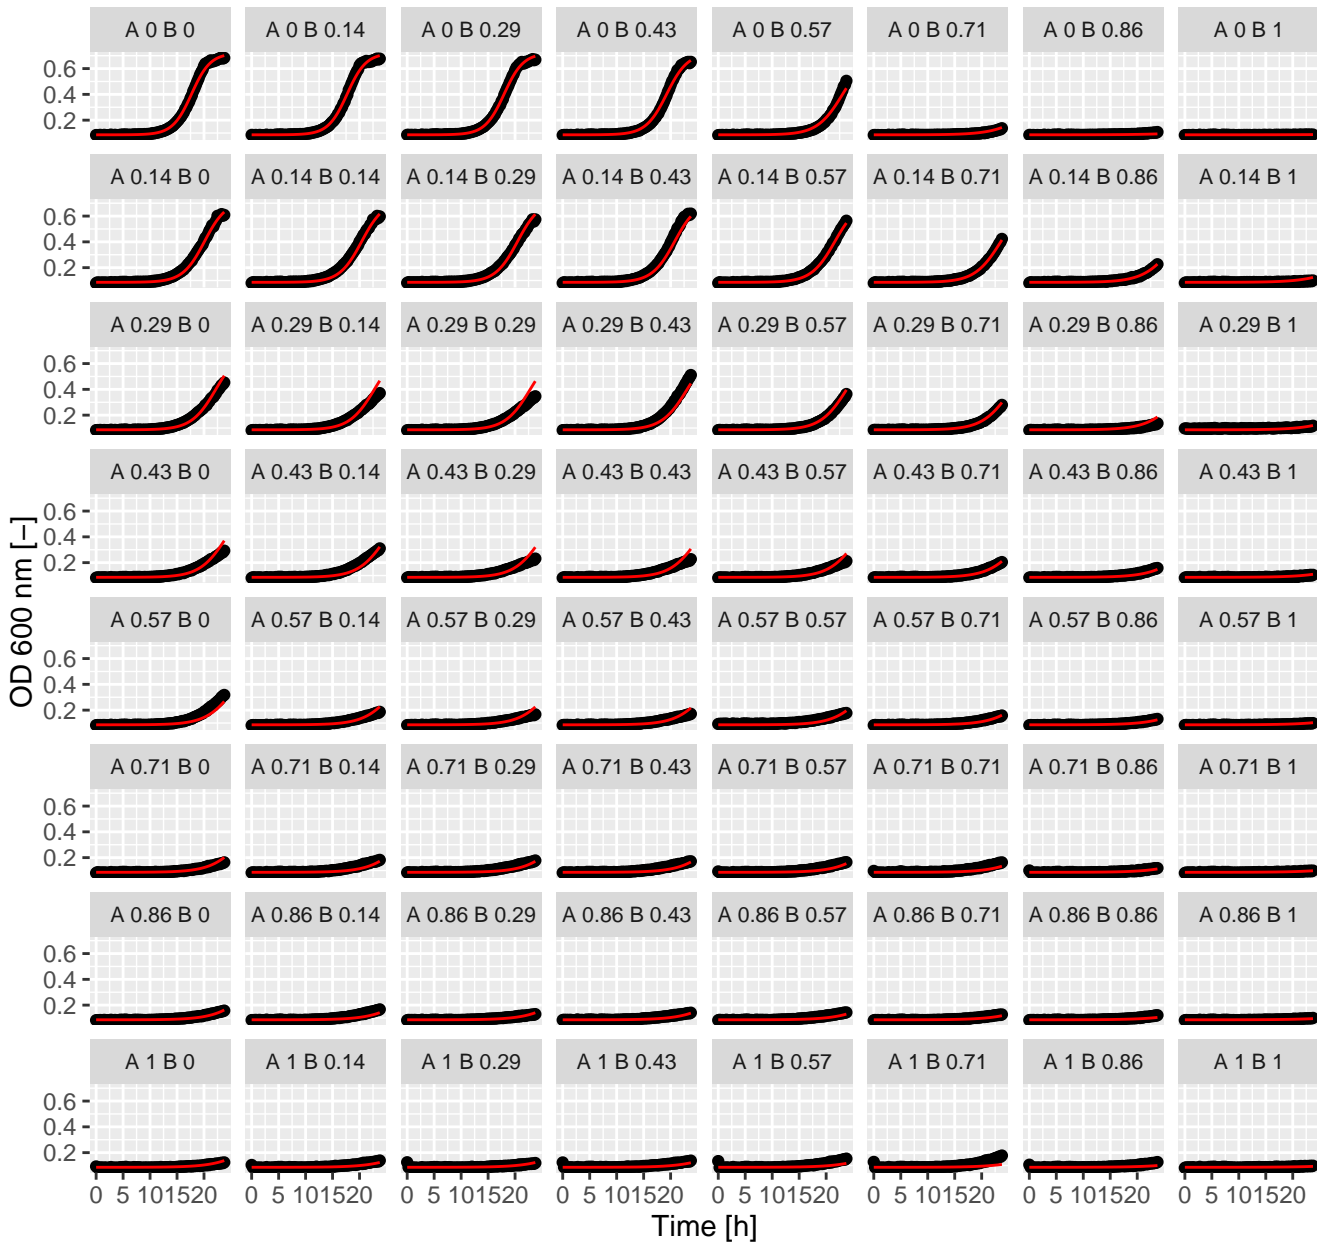

Can.Pen (= Ax.Bx) exp. additivity (BI)  
Int\_AB = 0 and Int\_BA = 0 at EC50

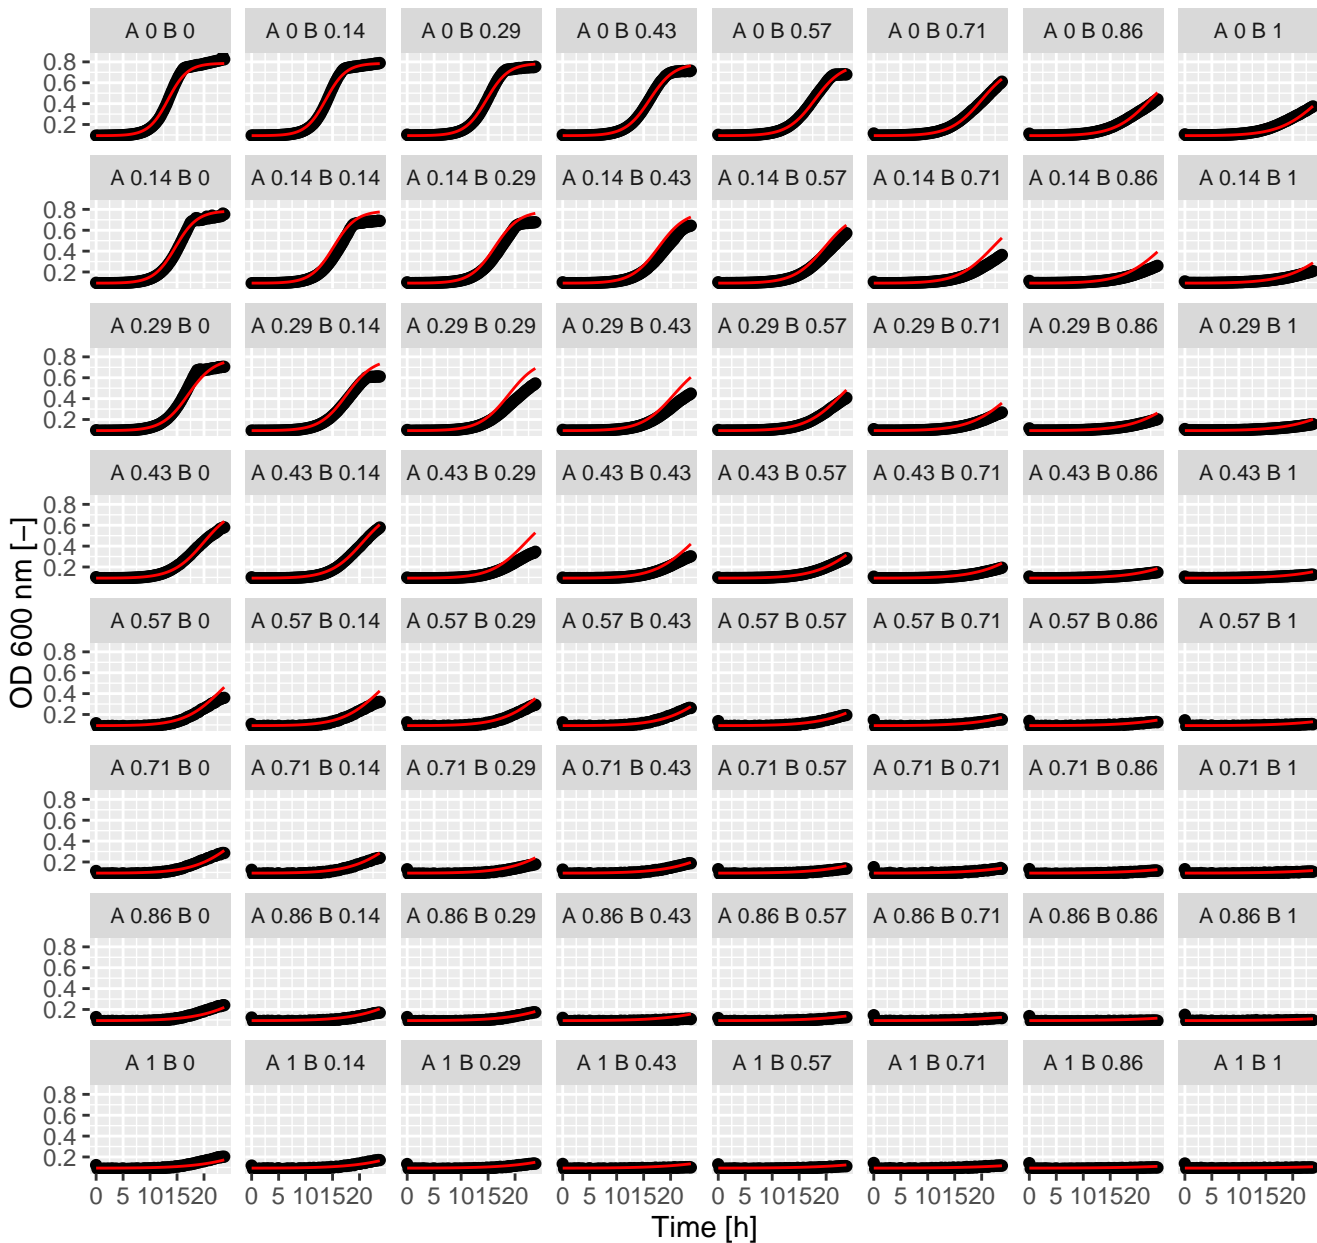

Can.Pen (= Ax.Bx) full GPDI  
Int\_AB = -0.1 and Int\_BA = -0.14 at EC50

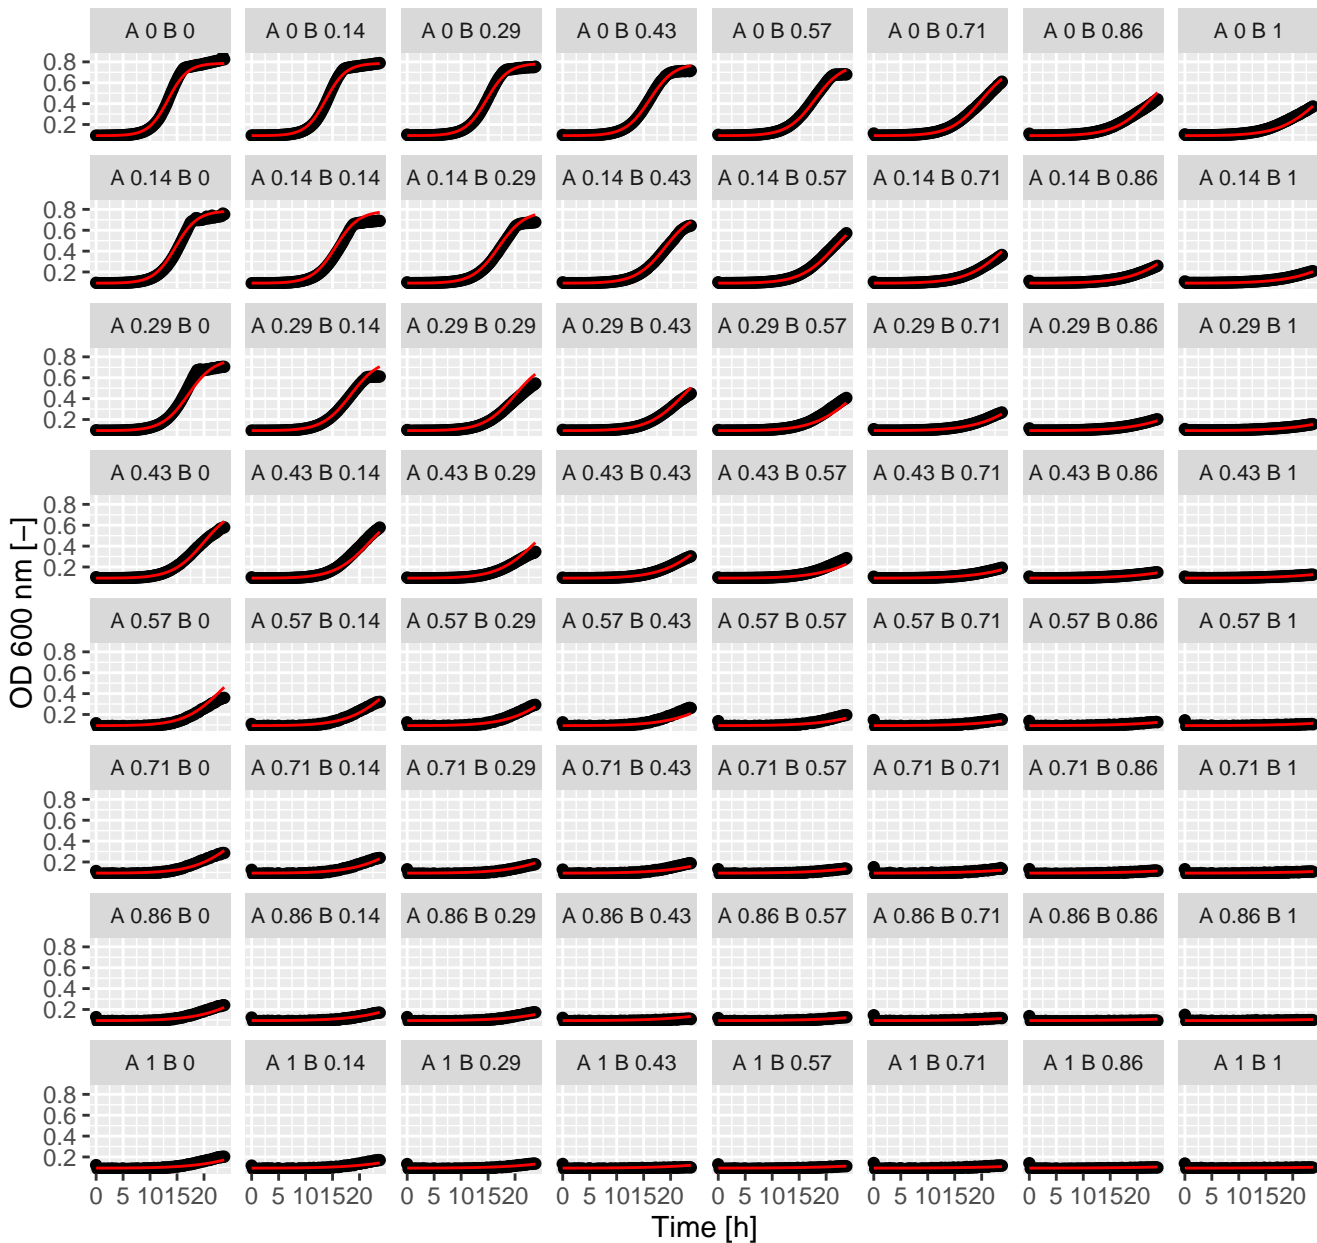

Can.Lat (= Ax.Bx) exp. additivity (BI)  
Int\_AB = 0 and Int\_BA = 0 at EC50

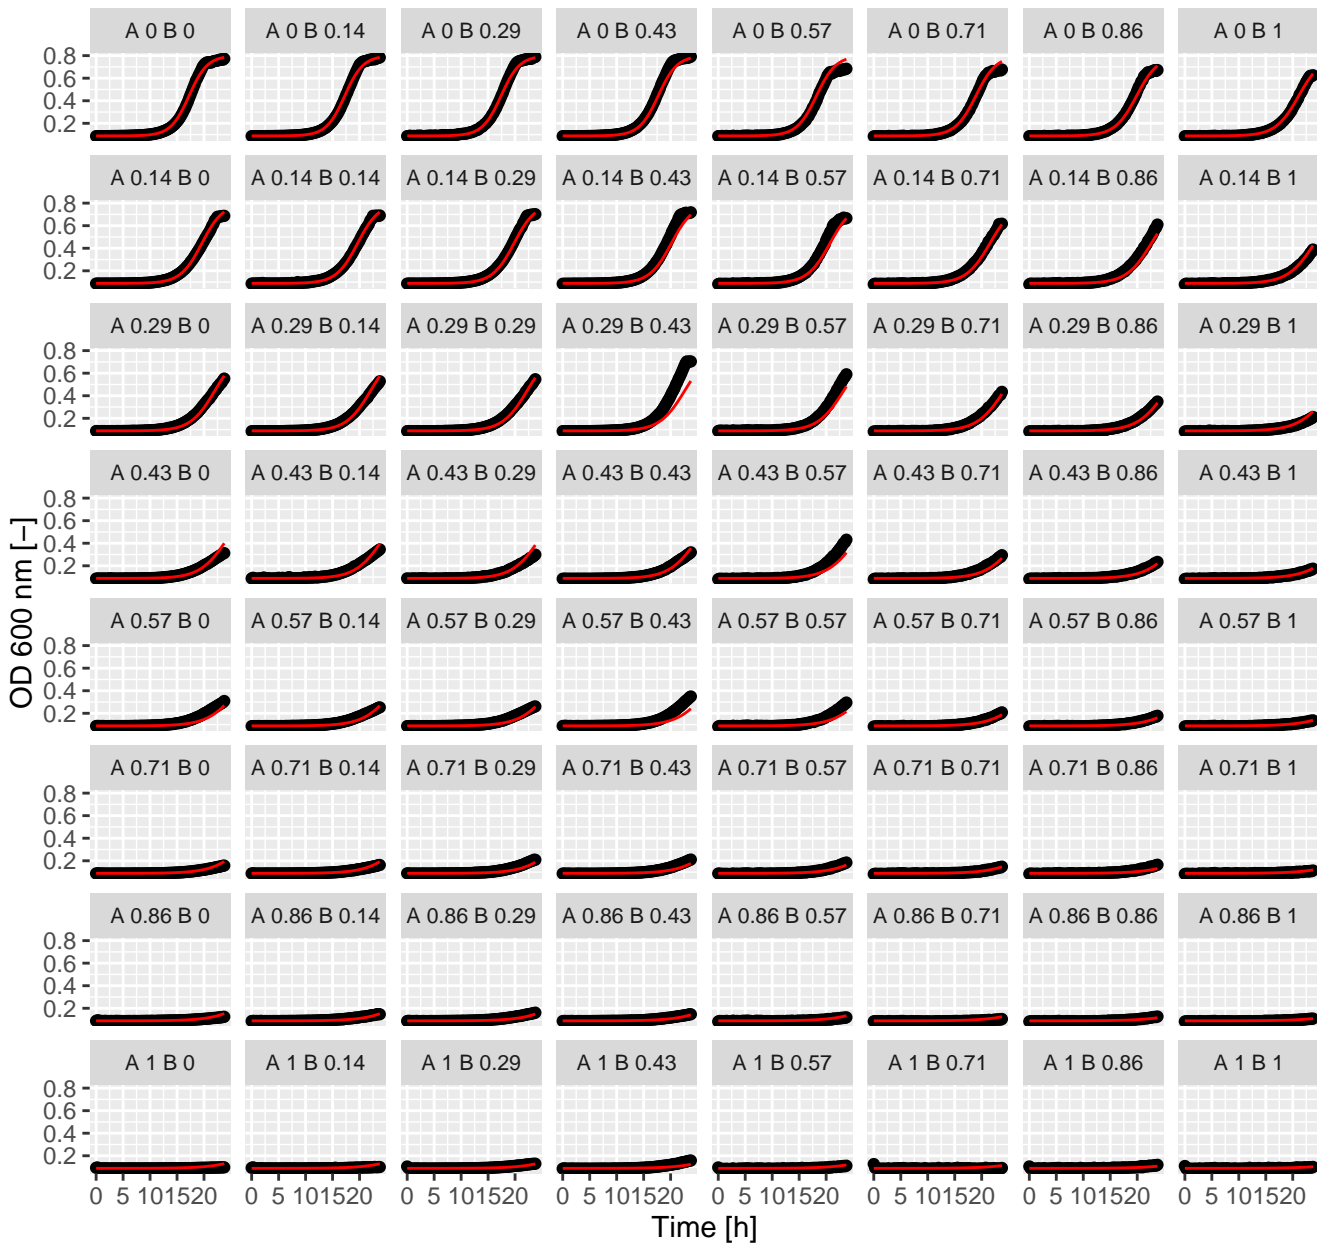

Can.Lat (= Ax.Bx) full GPDI  
Int\_AB = 1.13 and Int\_BA = -0.31 at EC50

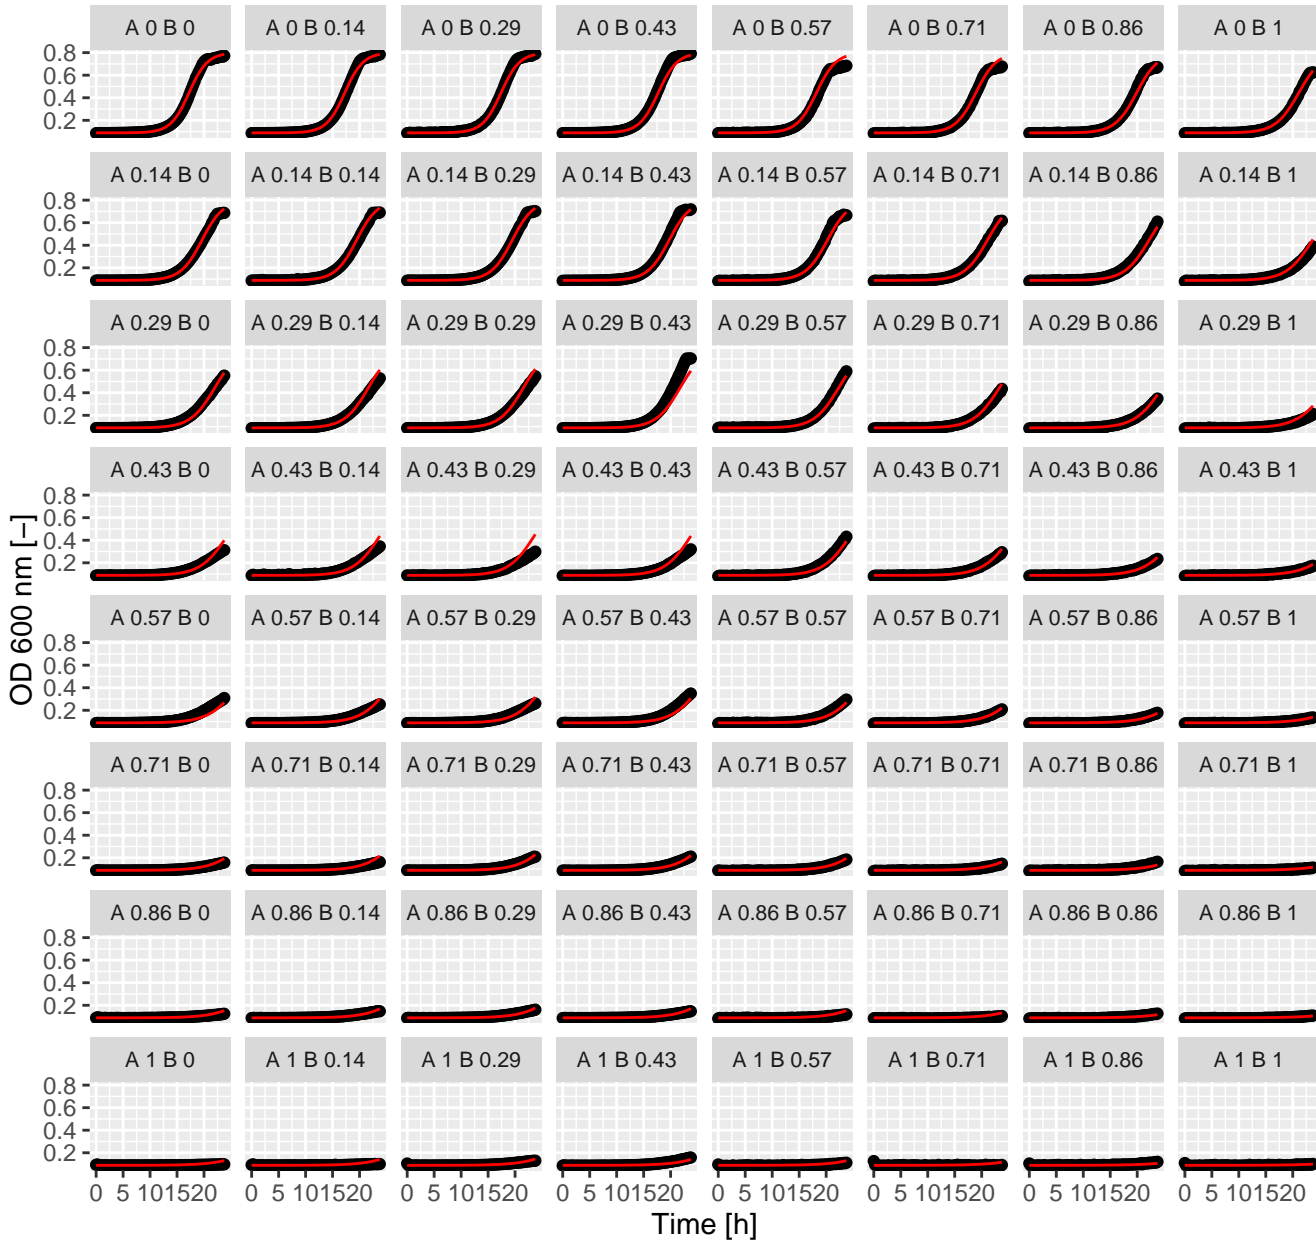

Can.Can (= Ax.Bx) exp. additivity (BI)  
Int\_AB = 0 and Int\_BA = 0 at EC50

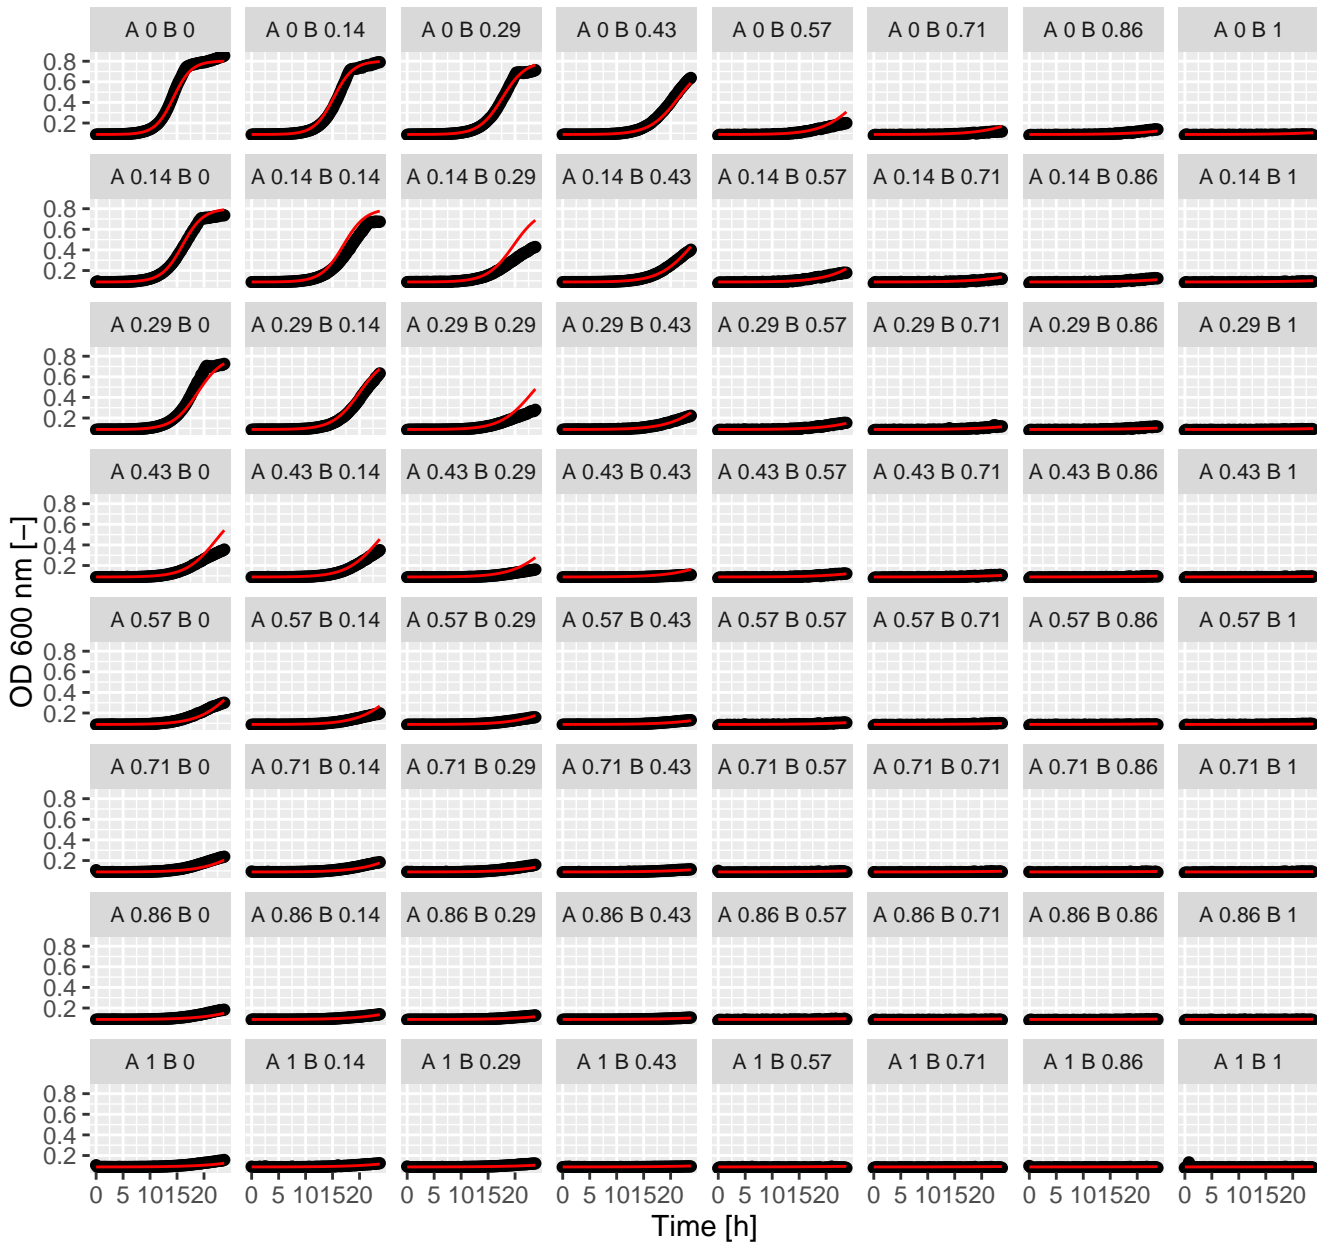

Can.Can (= Ax.Bx) full GPD1  
Int\_AB = -0.1 and Int\_BA = -0.15 at EC50

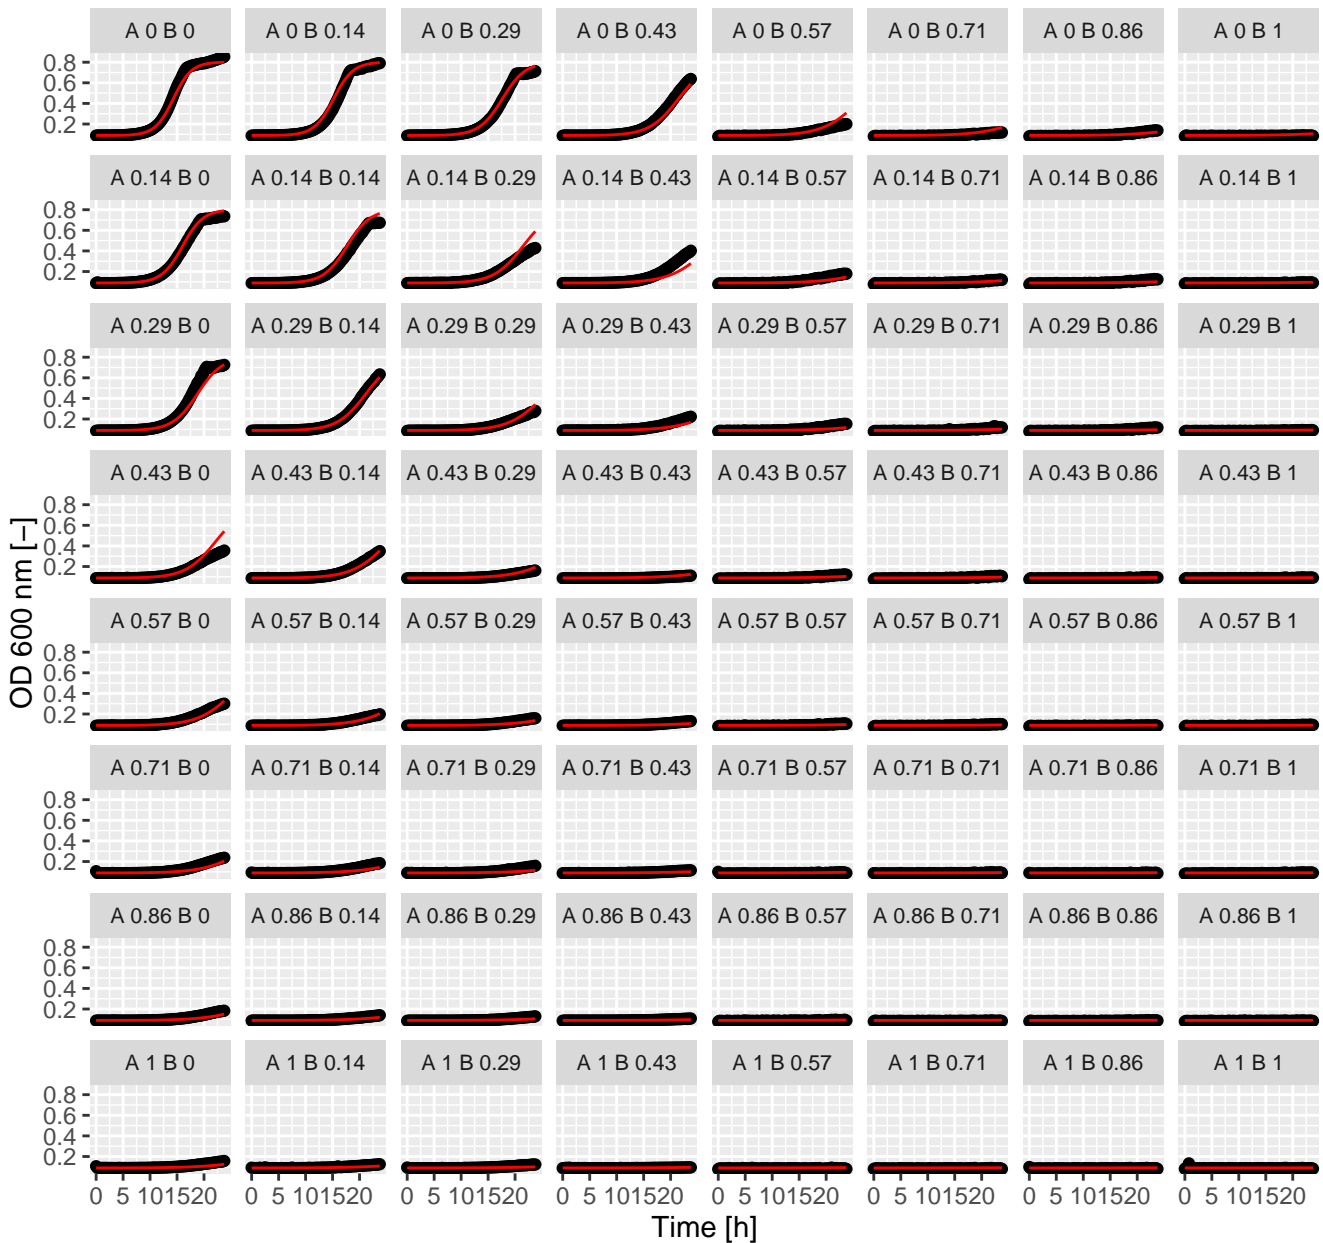



Cal.Tun (= Ax.Bx) exp. additivity (BI)  
Int\_AB = 0 and Int\_BA = 0 at EC50

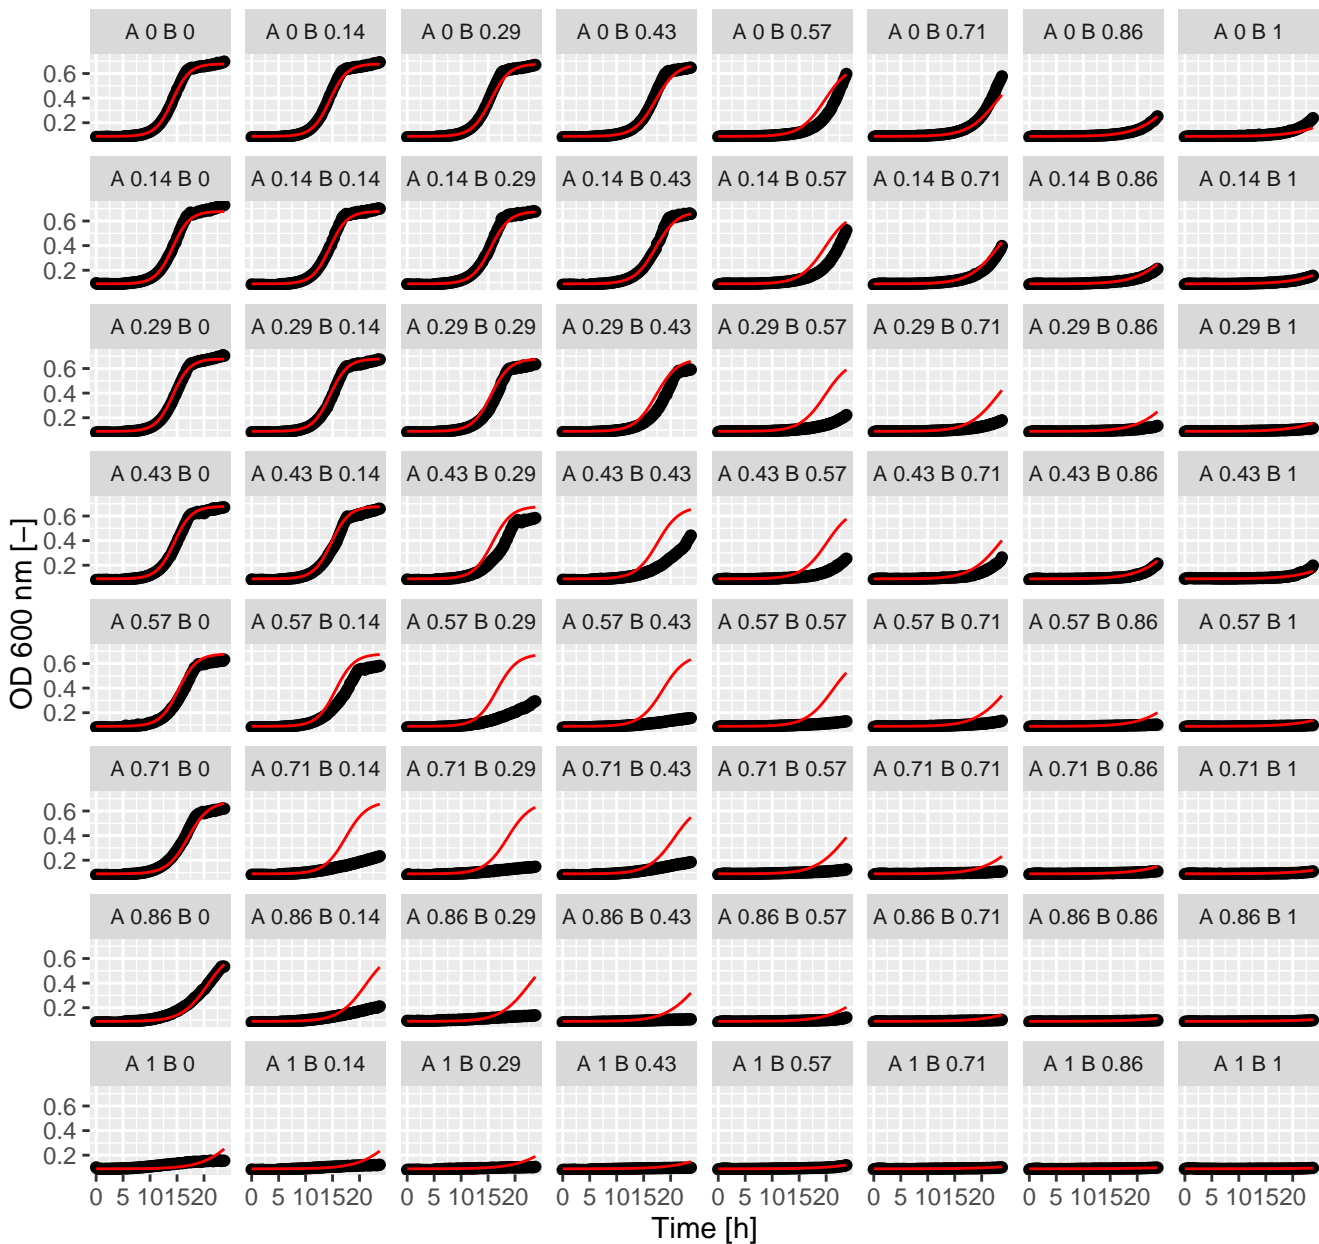

Cal.Tun (= Ax.Bx) full GPDI  
Int\_AB = -0.38 and Int\_BA = -0.47 at EC50

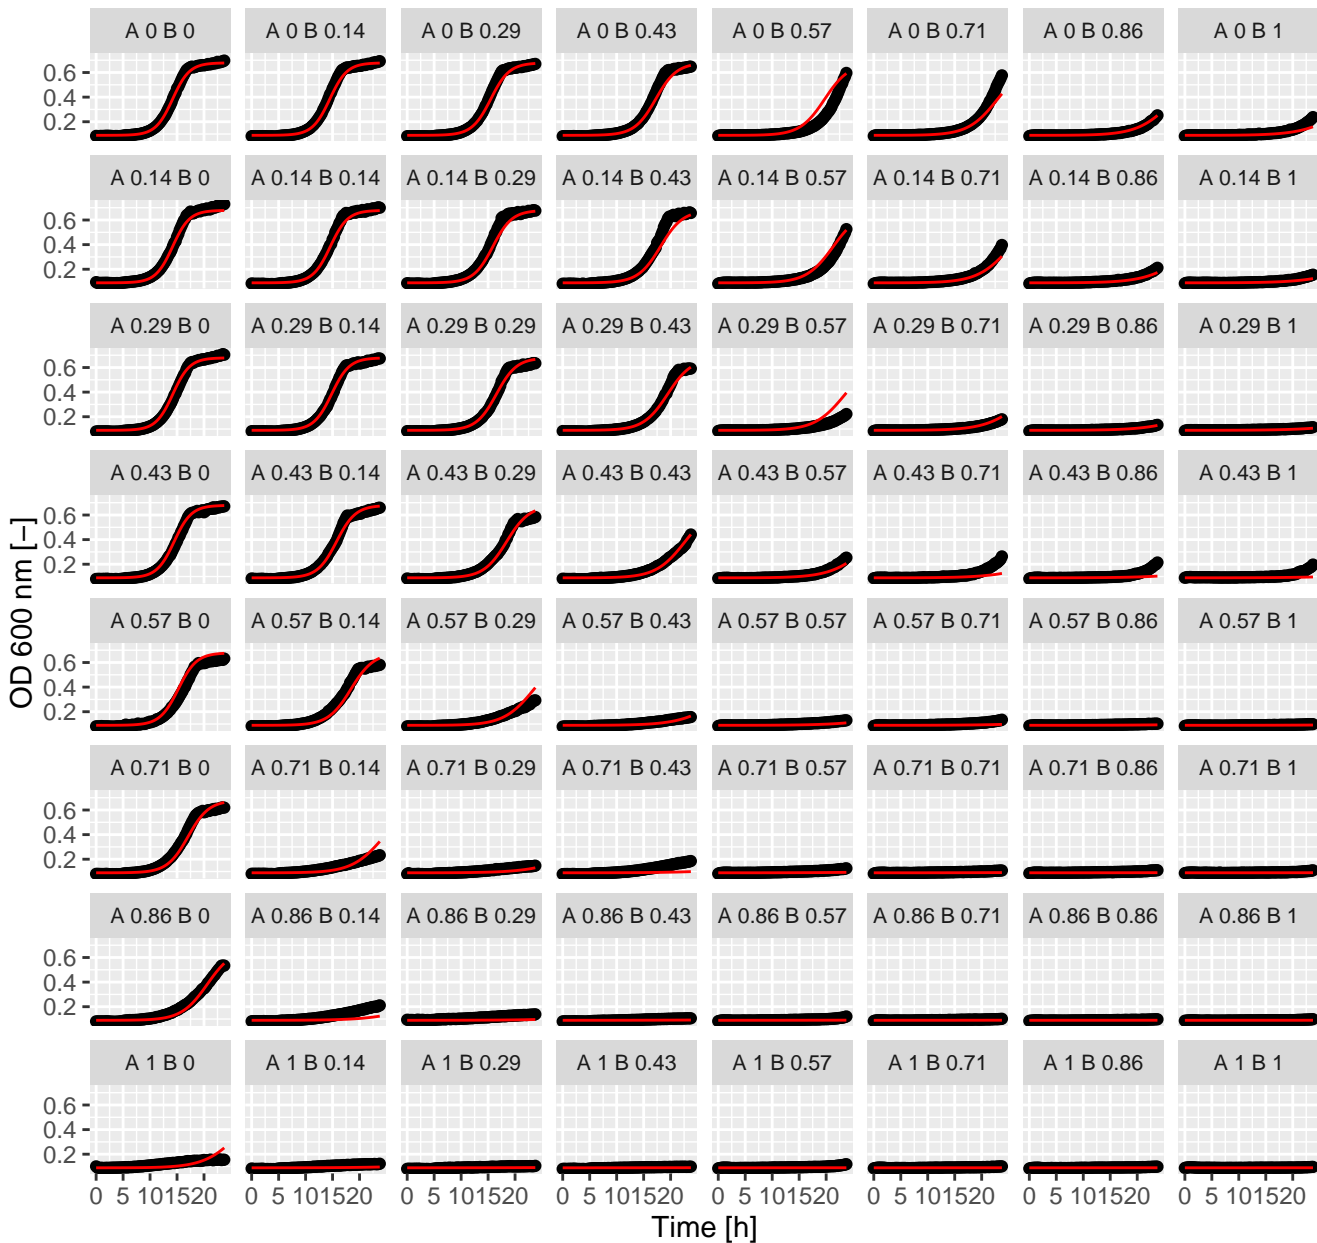

Cal.Ter (= Ax.Bx) exp. additivity (BI)  
Int\_AB = 0 and Int\_BA = 0 at EC50

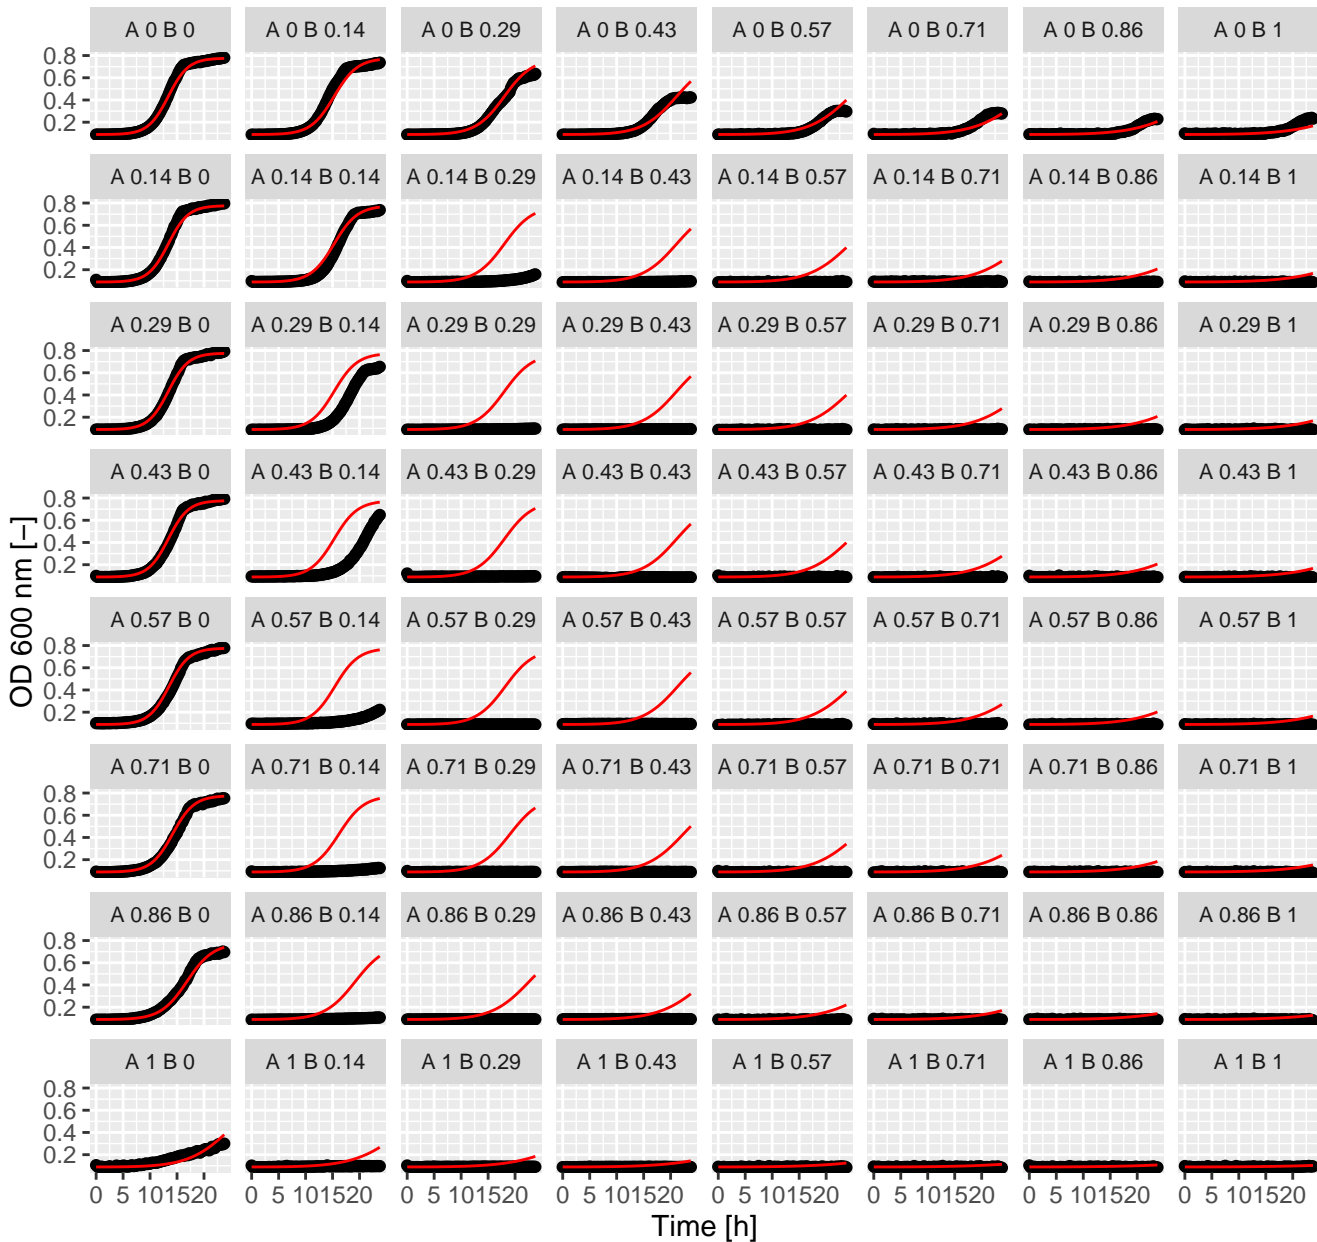

Cal.Ter (= Ax.Bx) full GPDI  
 Int\_AB = -0.73 and Int\_BA = -0.66 at EC50

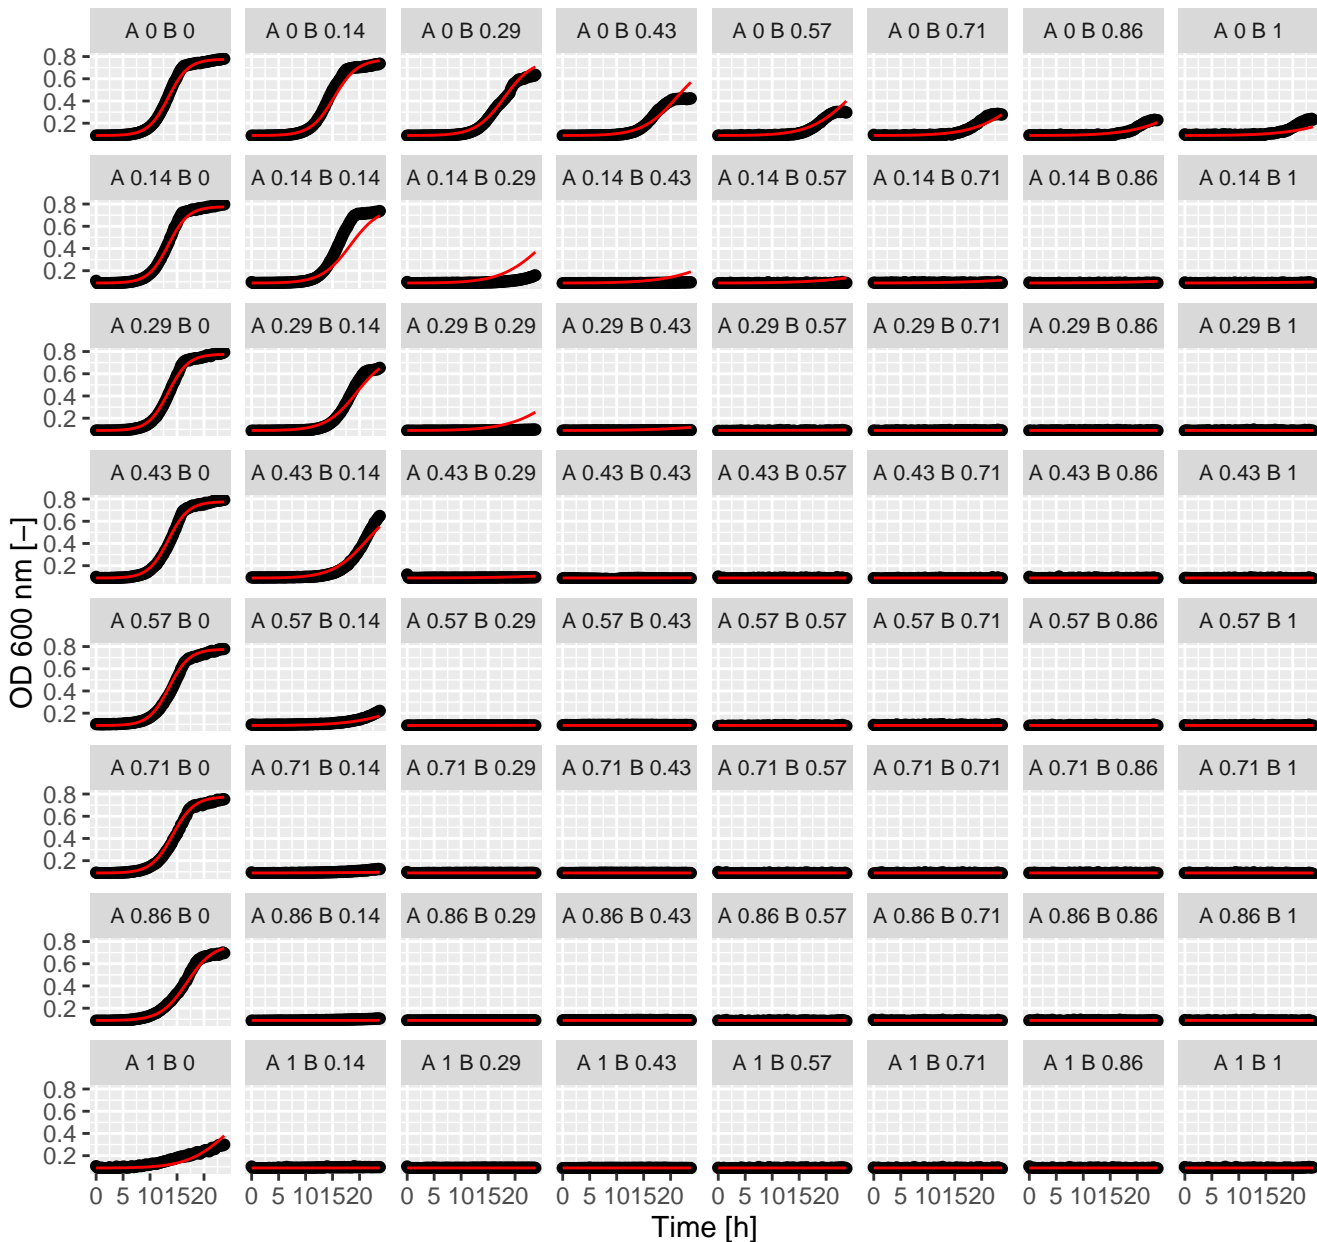

Cal.Tac (= Ax.Bx) exp. additivity (BI)  
Int\_AB = 0 and Int\_BA = 0 at EC50

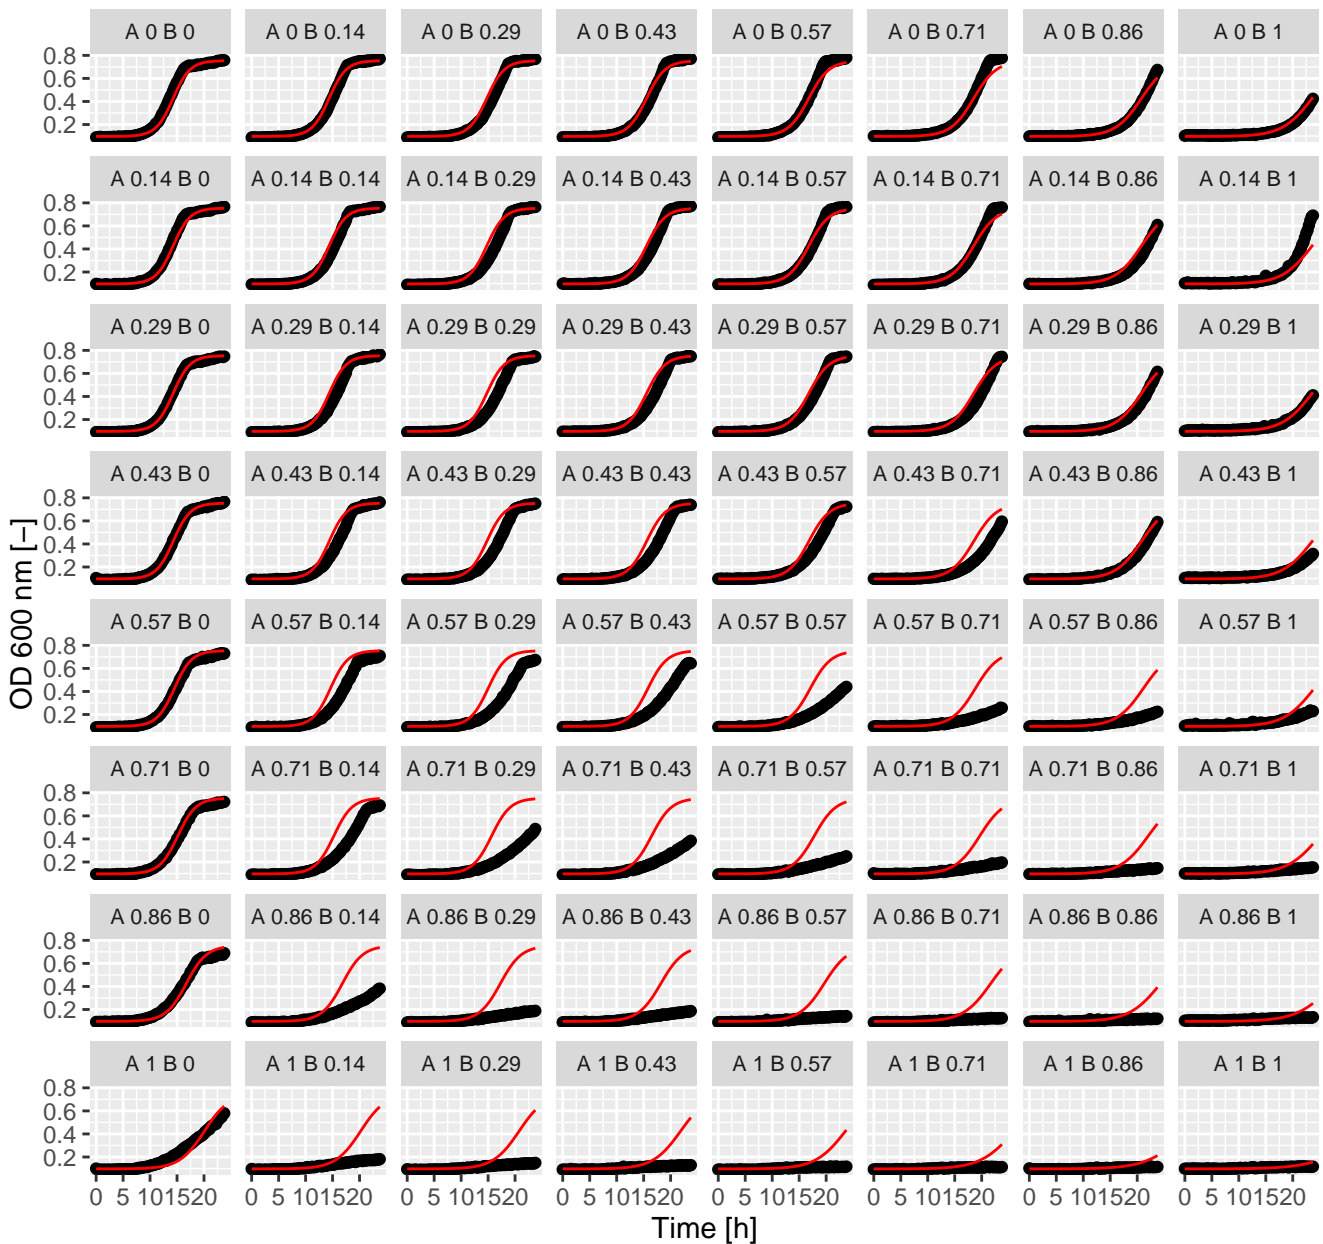

Cal.Tac (= Ax.Bx) full GPDI  
Int\_AB = -0.39 and Int\_BA = -0.24 at EC50

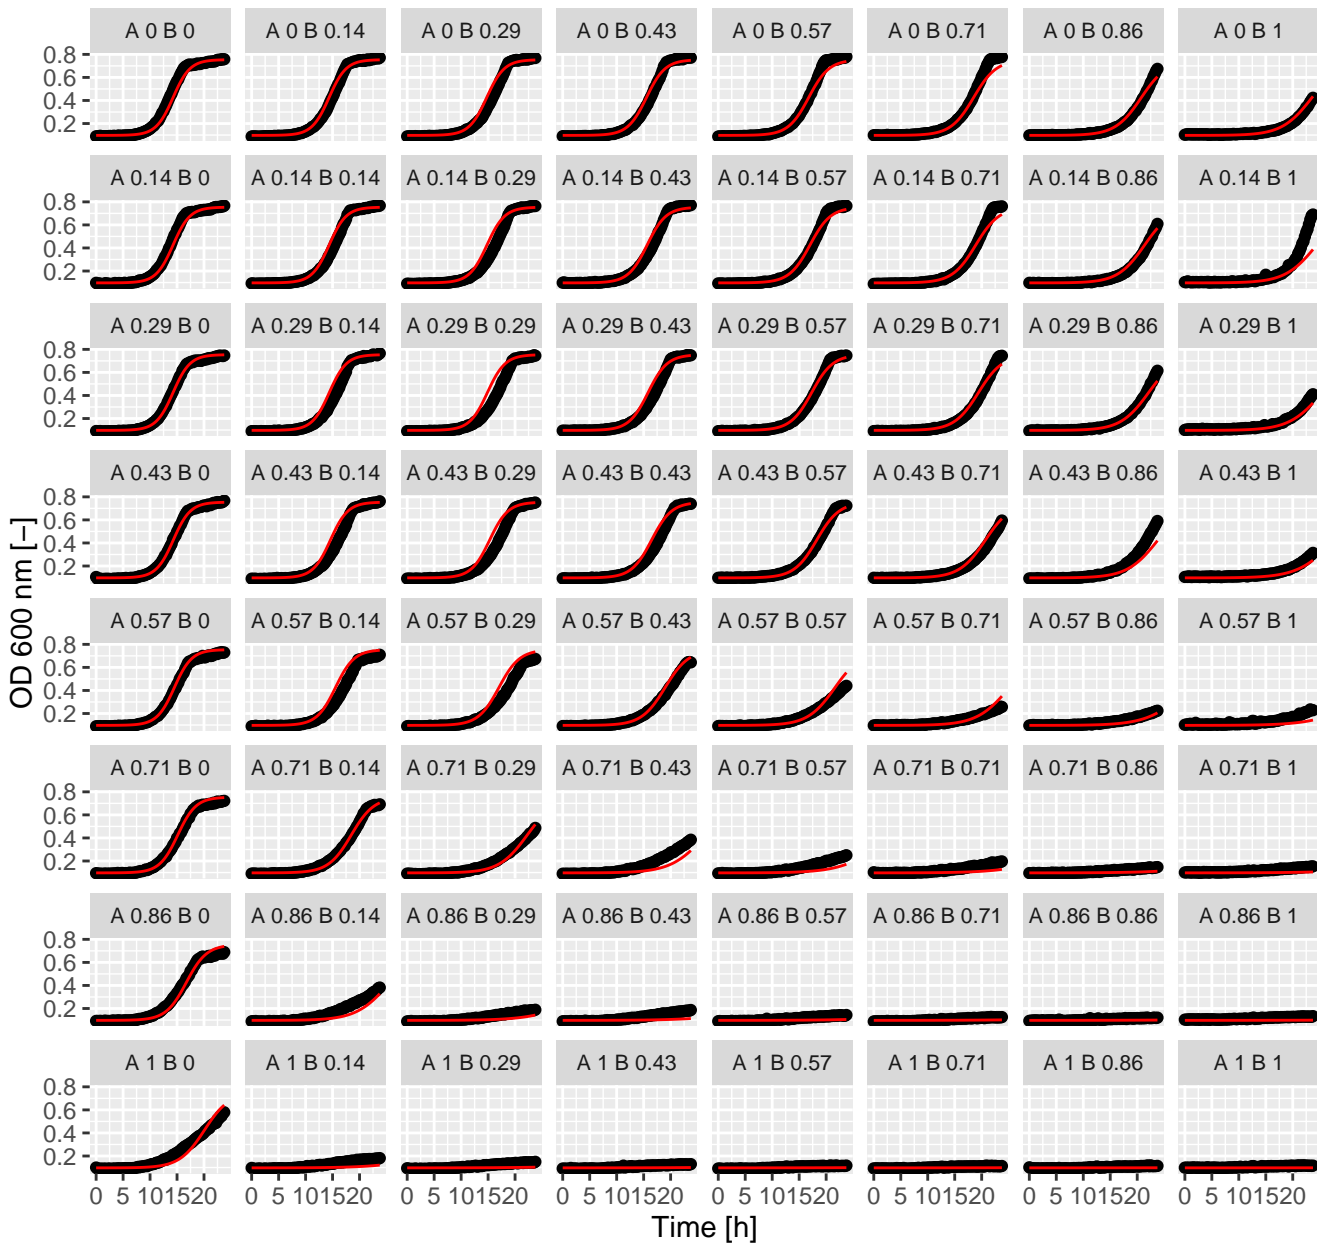

Cal.Sta (= Ax.Bx) exp. additivity (BI)  
Int\_AB = 0 and Int\_BA = 0 at EC50

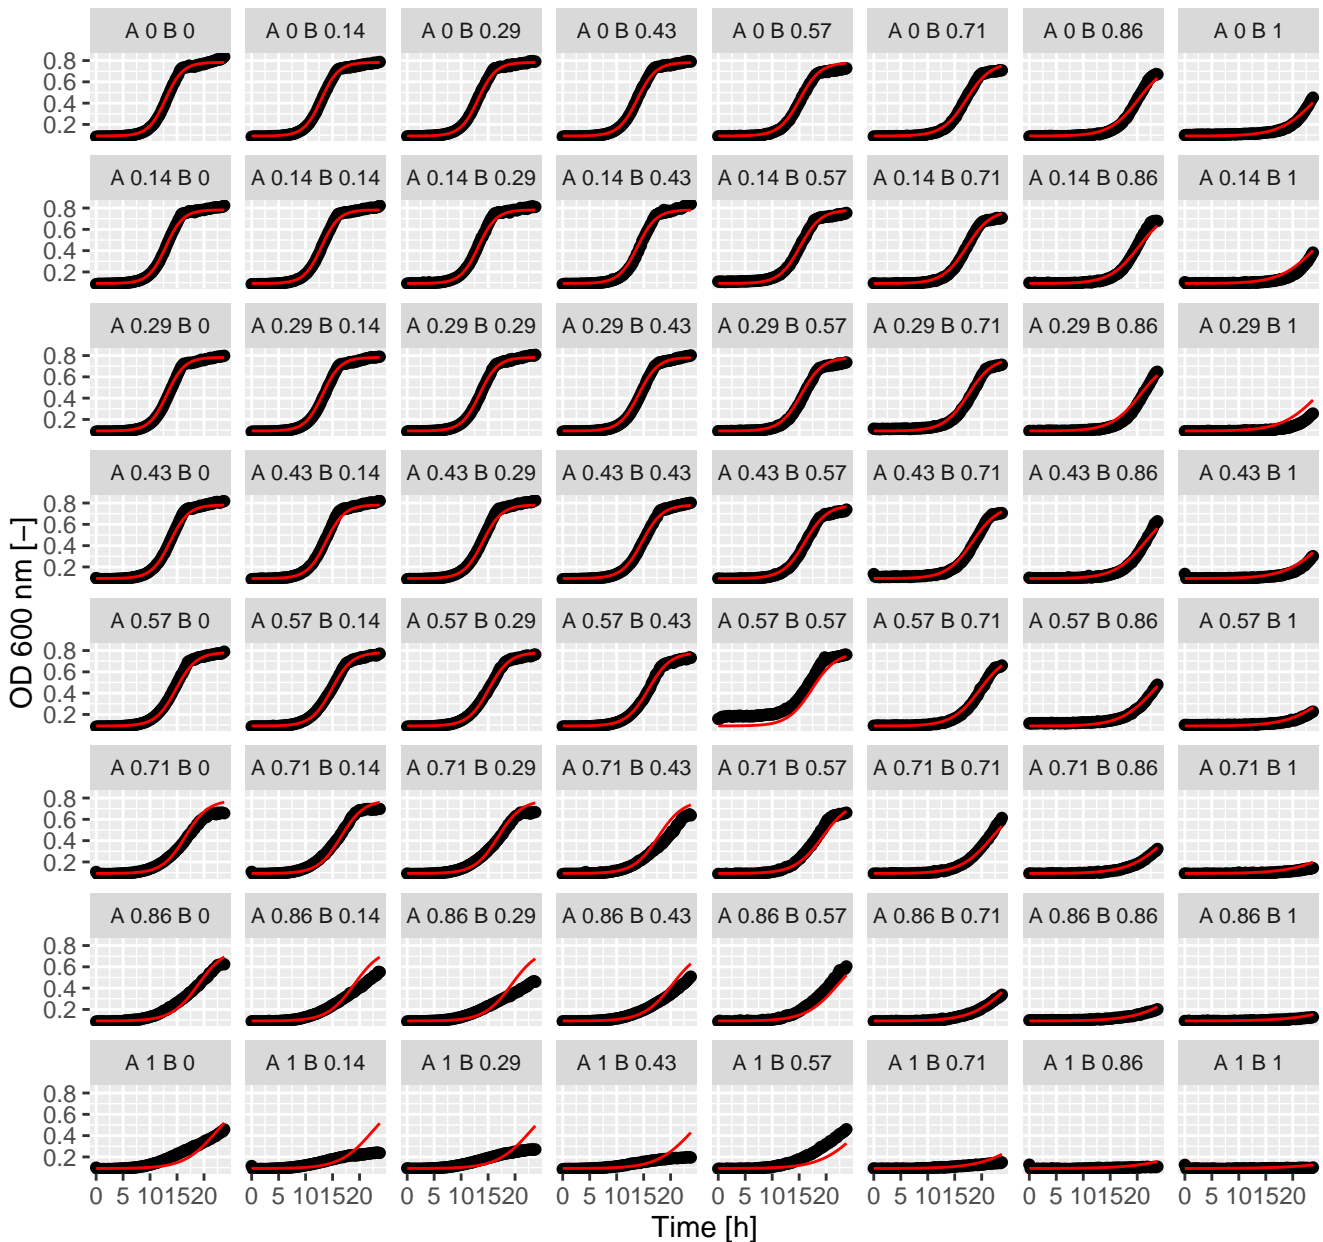

Cal.Sta (= Ax.Bx) full GPDI  
Int\_AB = -0.03 and Int\_BA = -0.01 at EC50

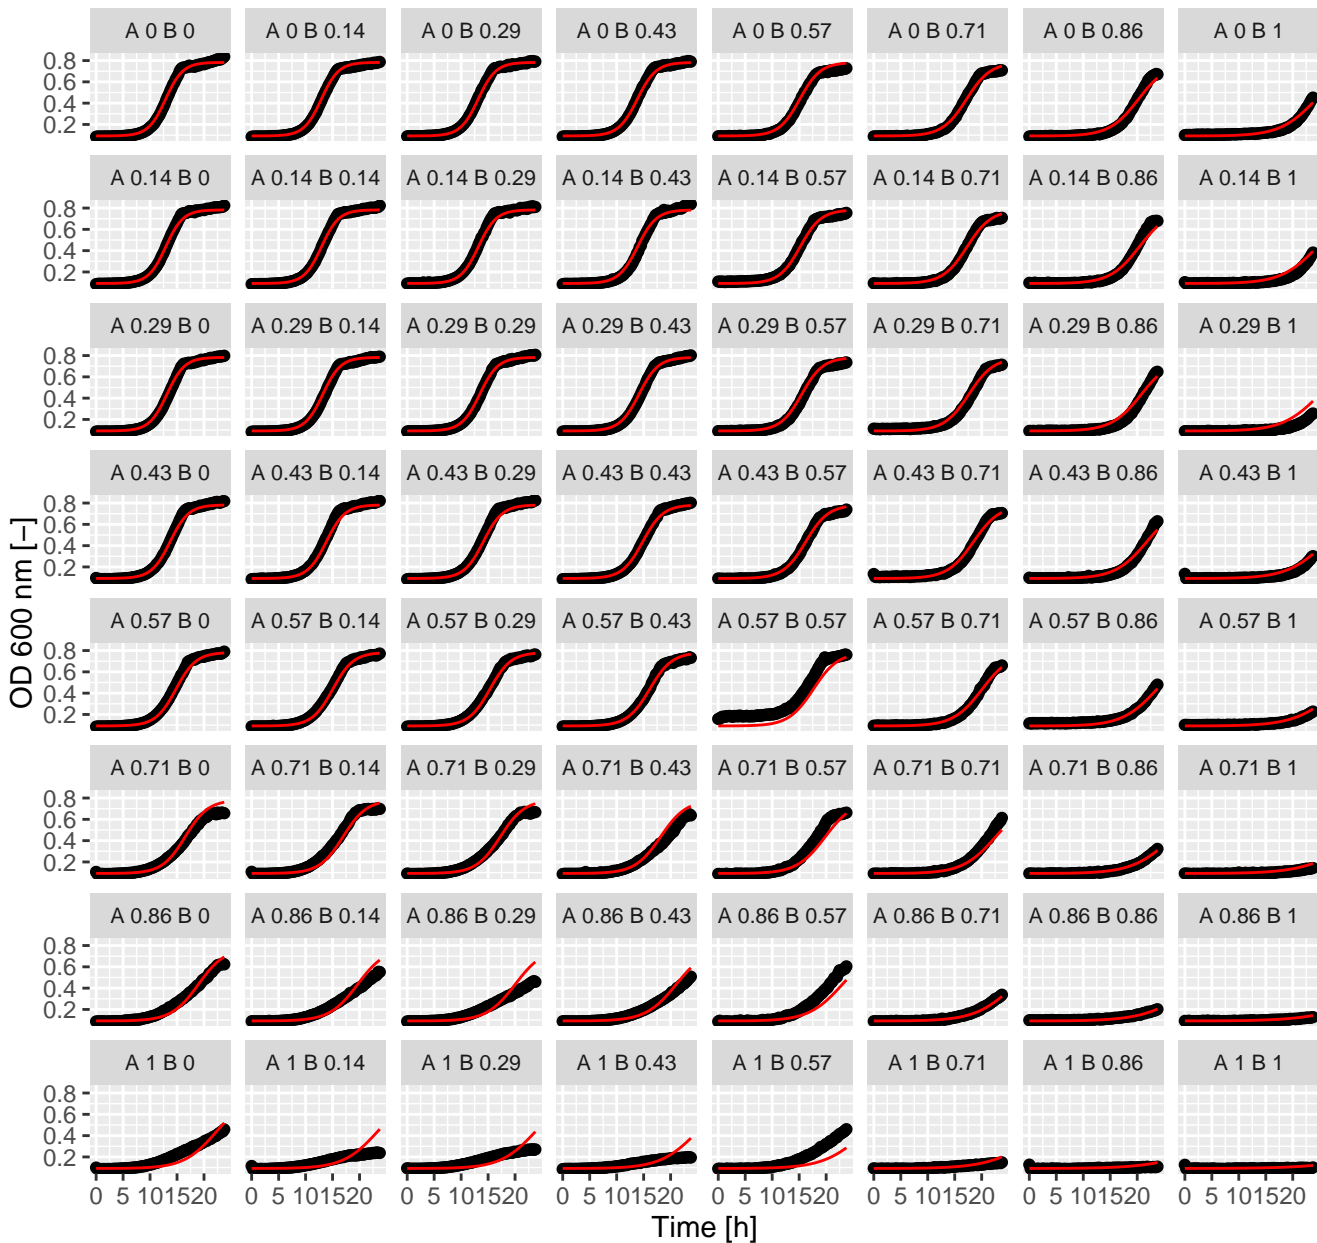



Cal.Rap (= Ax.Bx) exp. additivity (BI)  
Int\_AB = 0 and Int\_BA = 0 at EC50

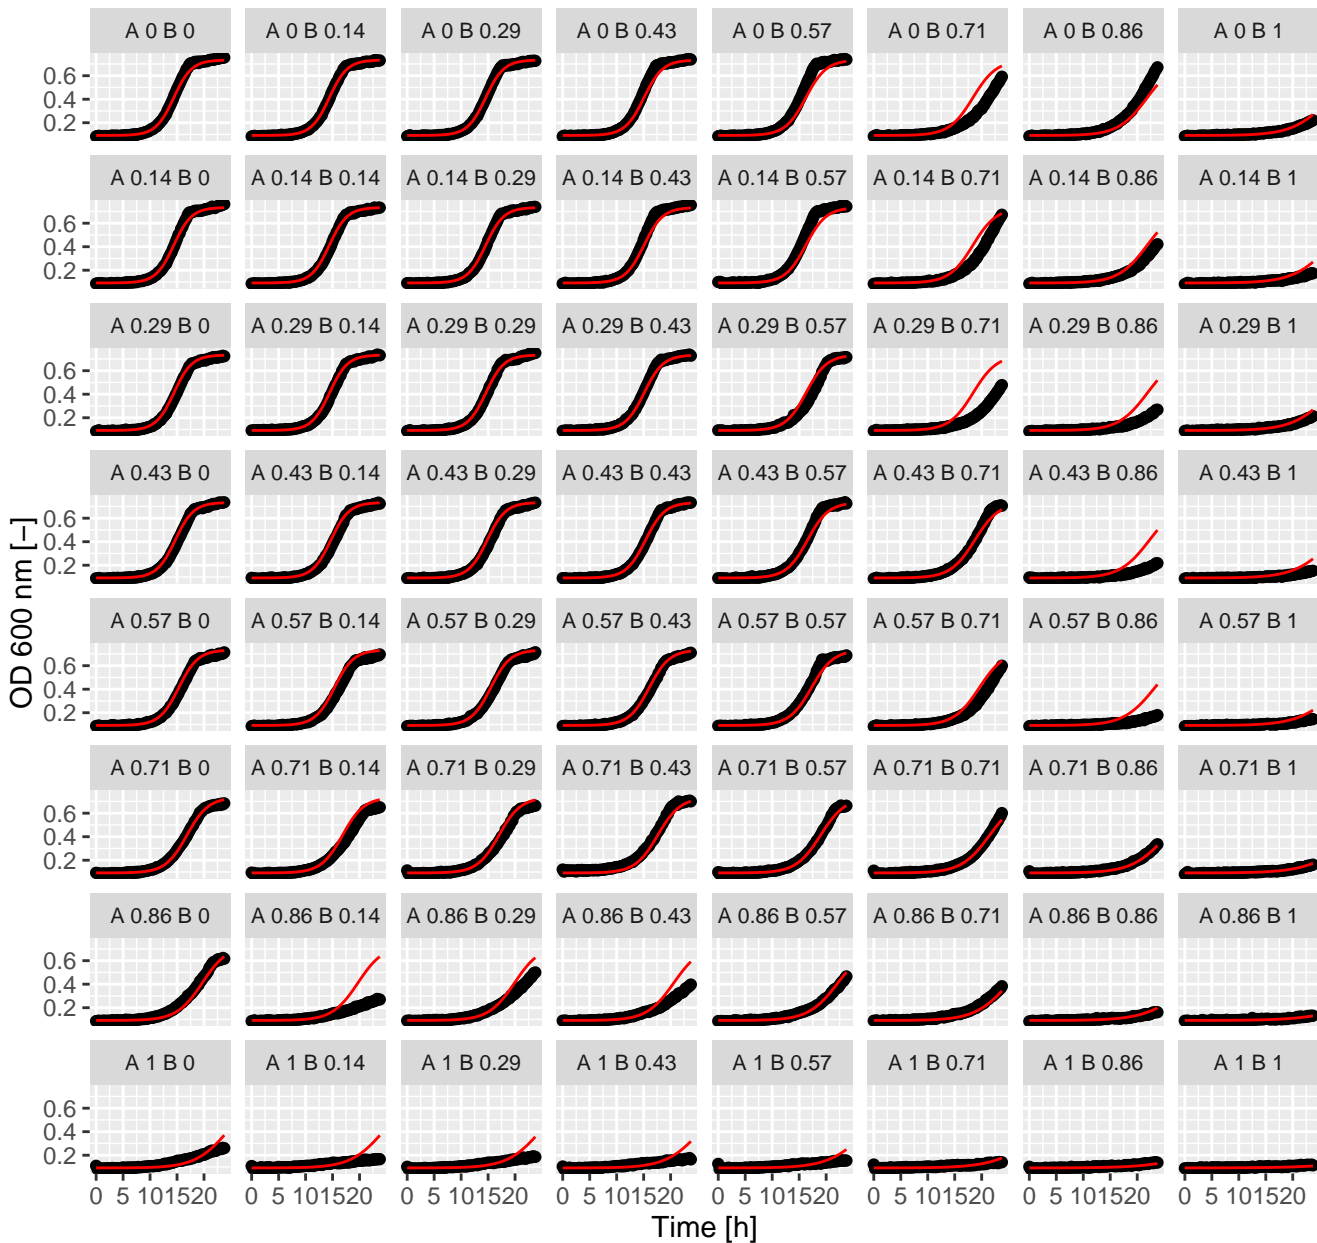

Cal.Rap (= Ax.Bx) full GPDI  
Int\_AB = -0.05 and Int\_BA = -0.06 at EC50

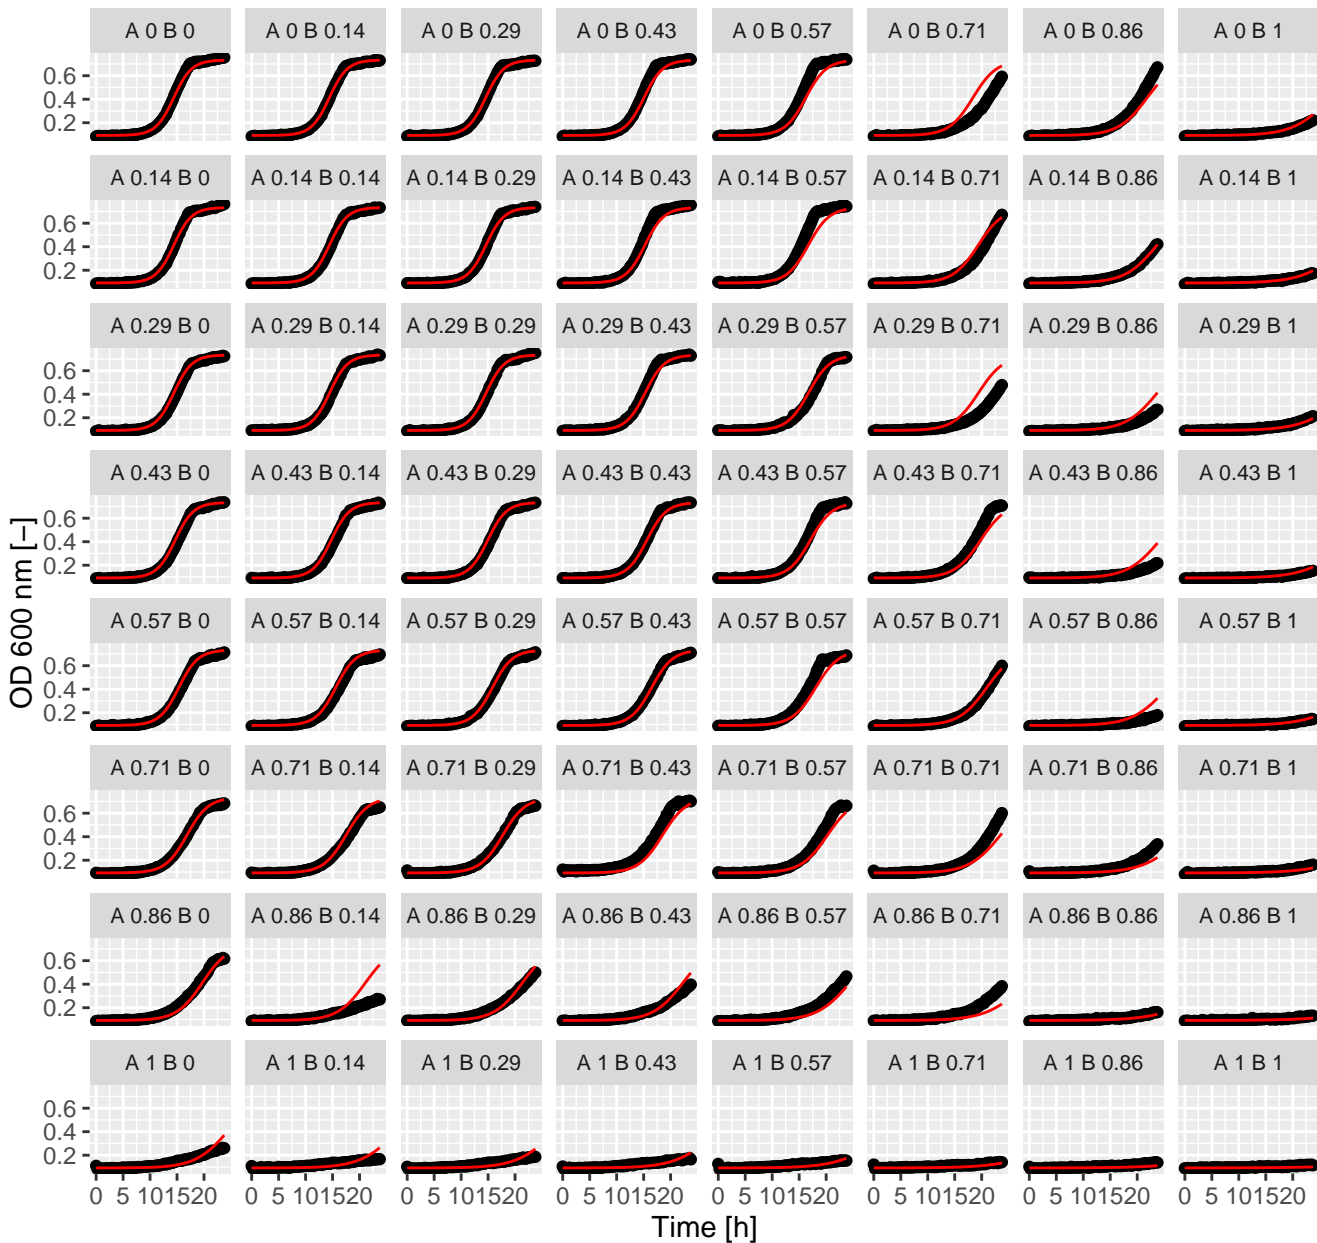

Cal.Pen (= Ax.Bx) exp. additivity (BI)  
Int\_AB = 0 and Int\_BA = 0 at EC50

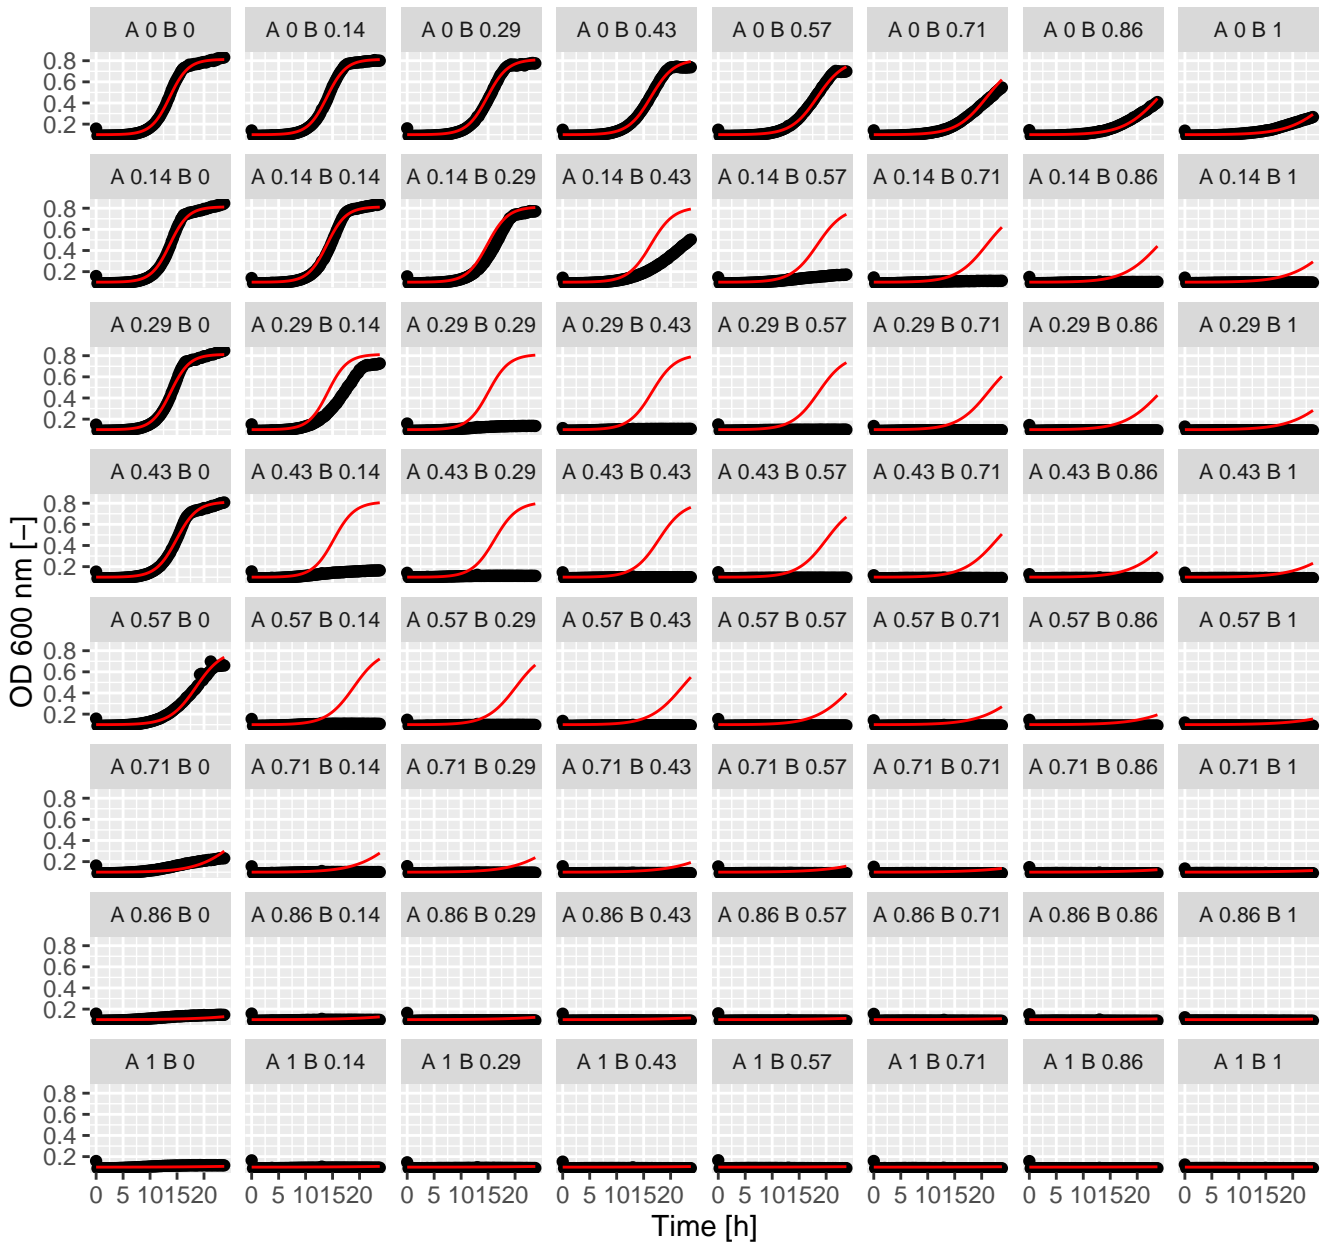

Cal.Pen (= Ax.Bx) full GPDI  
Int\_AB = -0.83 and Int\_BA = -0.28 at EC50

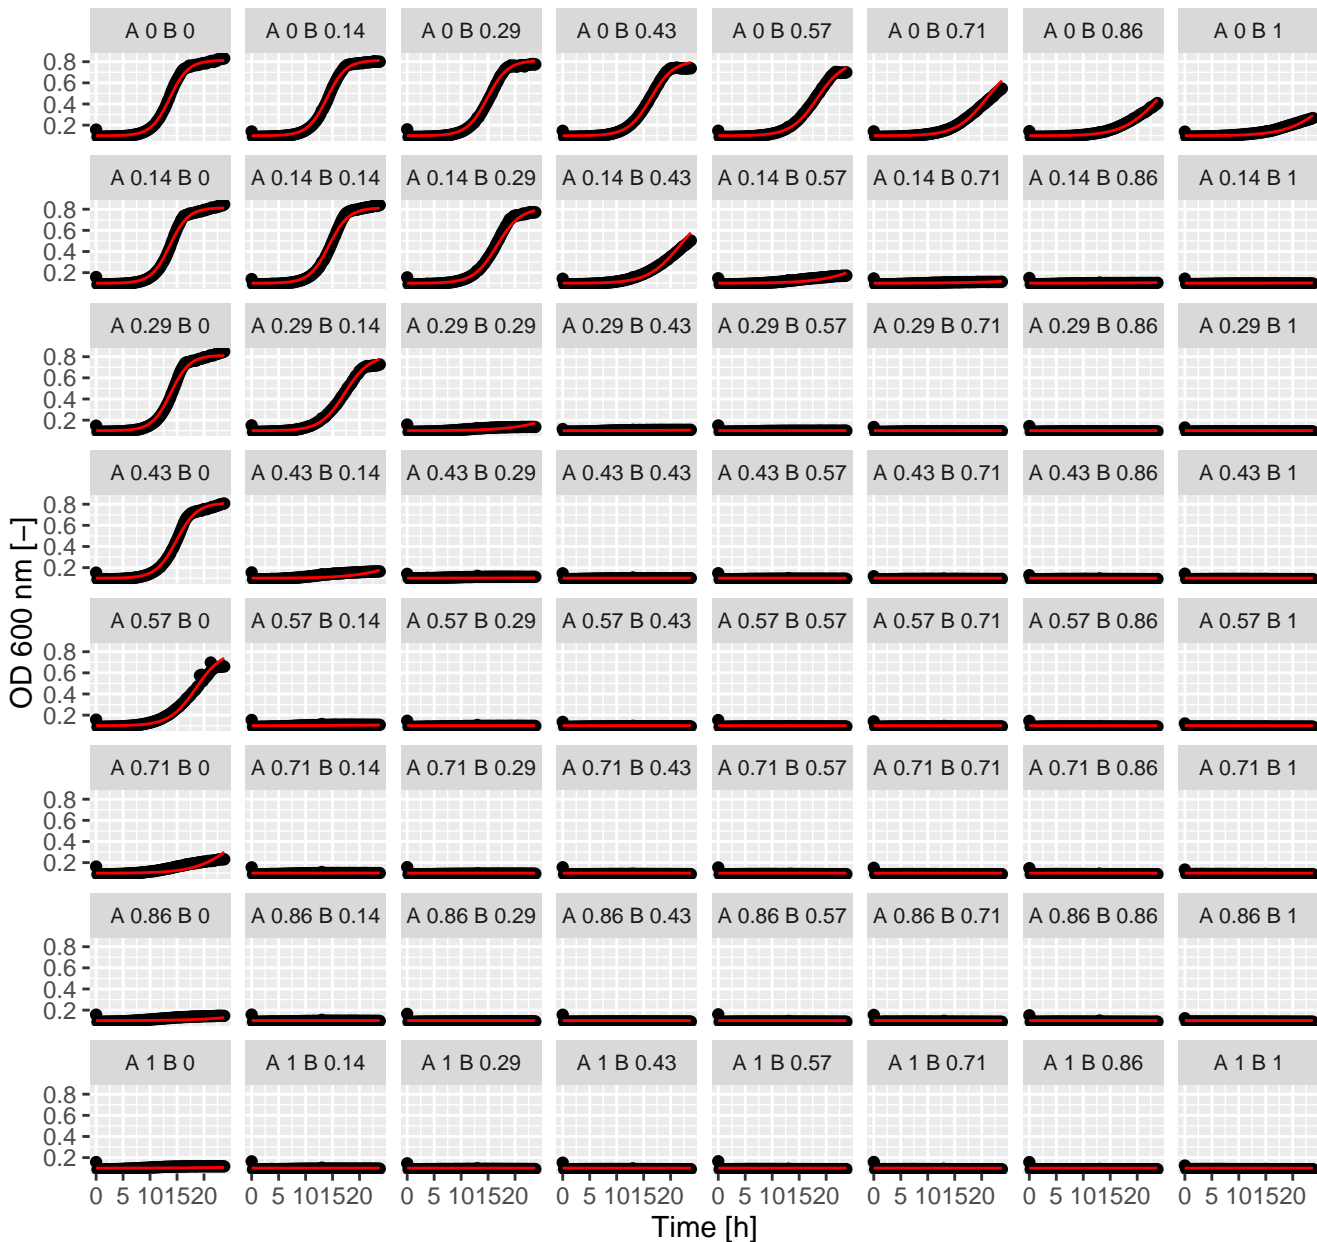

Cal.Lat (= Ax.Bx) exp. additivity (BI)  
Int\_AB = 0 and Int\_BA = 0 at EC50

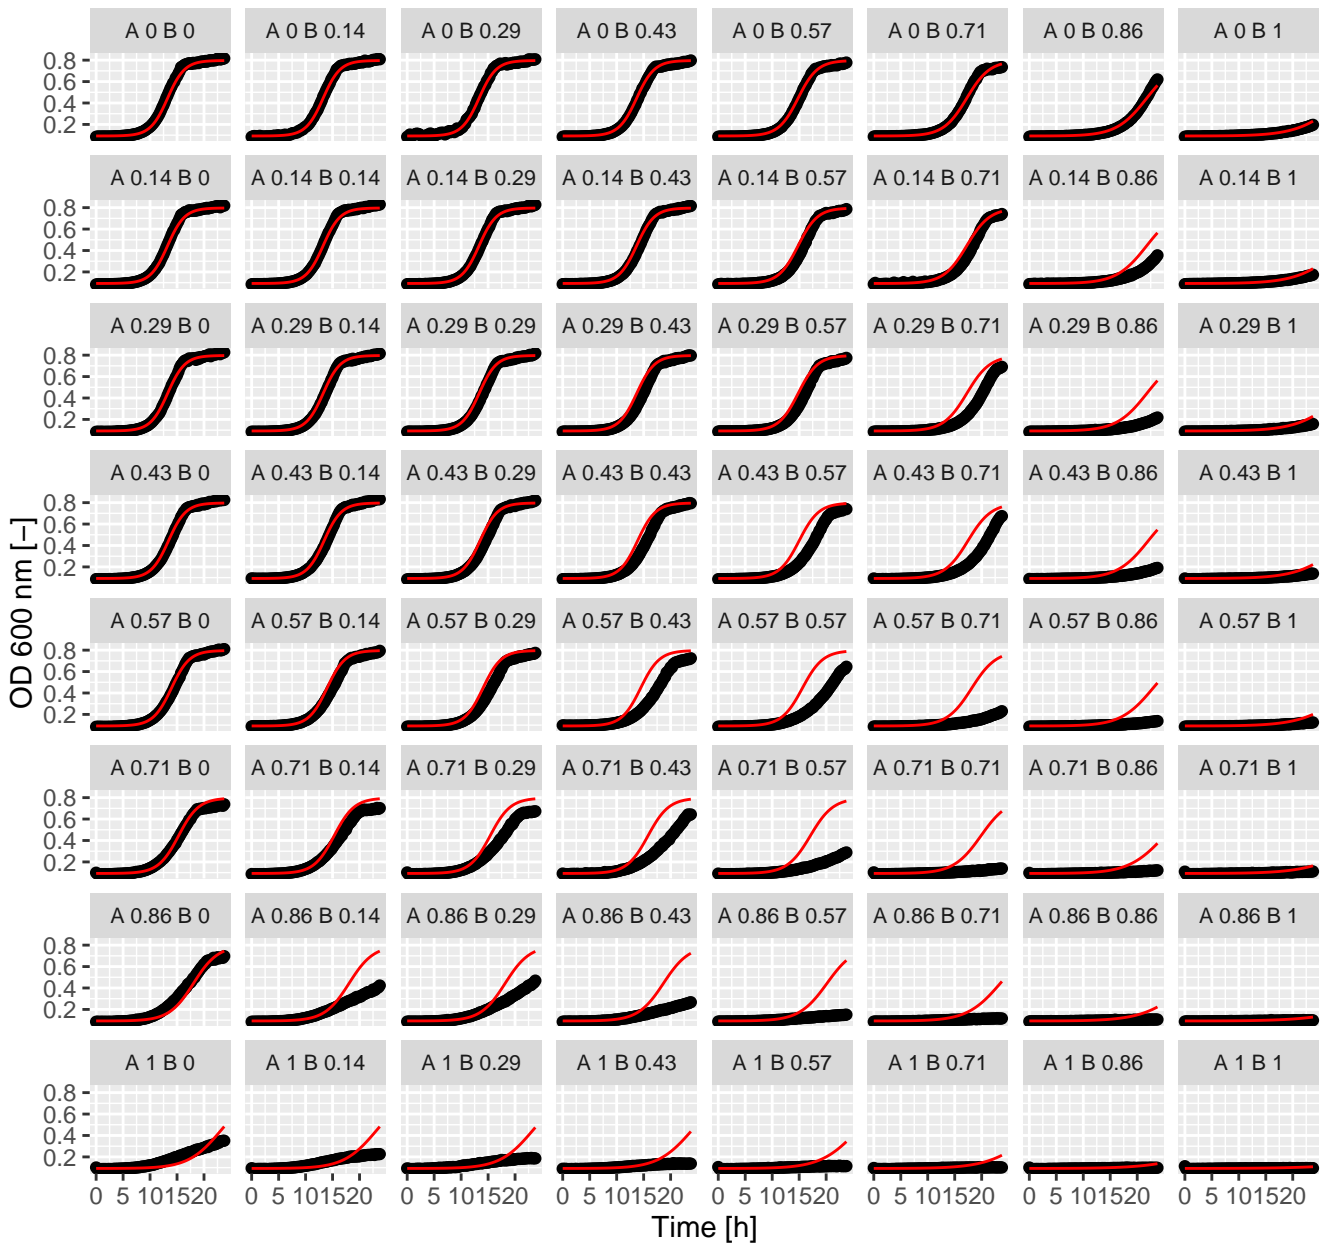

Cal.Lat (= Ax.Bx) full GPDI  
Int\_AB = -0.17 and Int\_BA = -0.34 at EC50

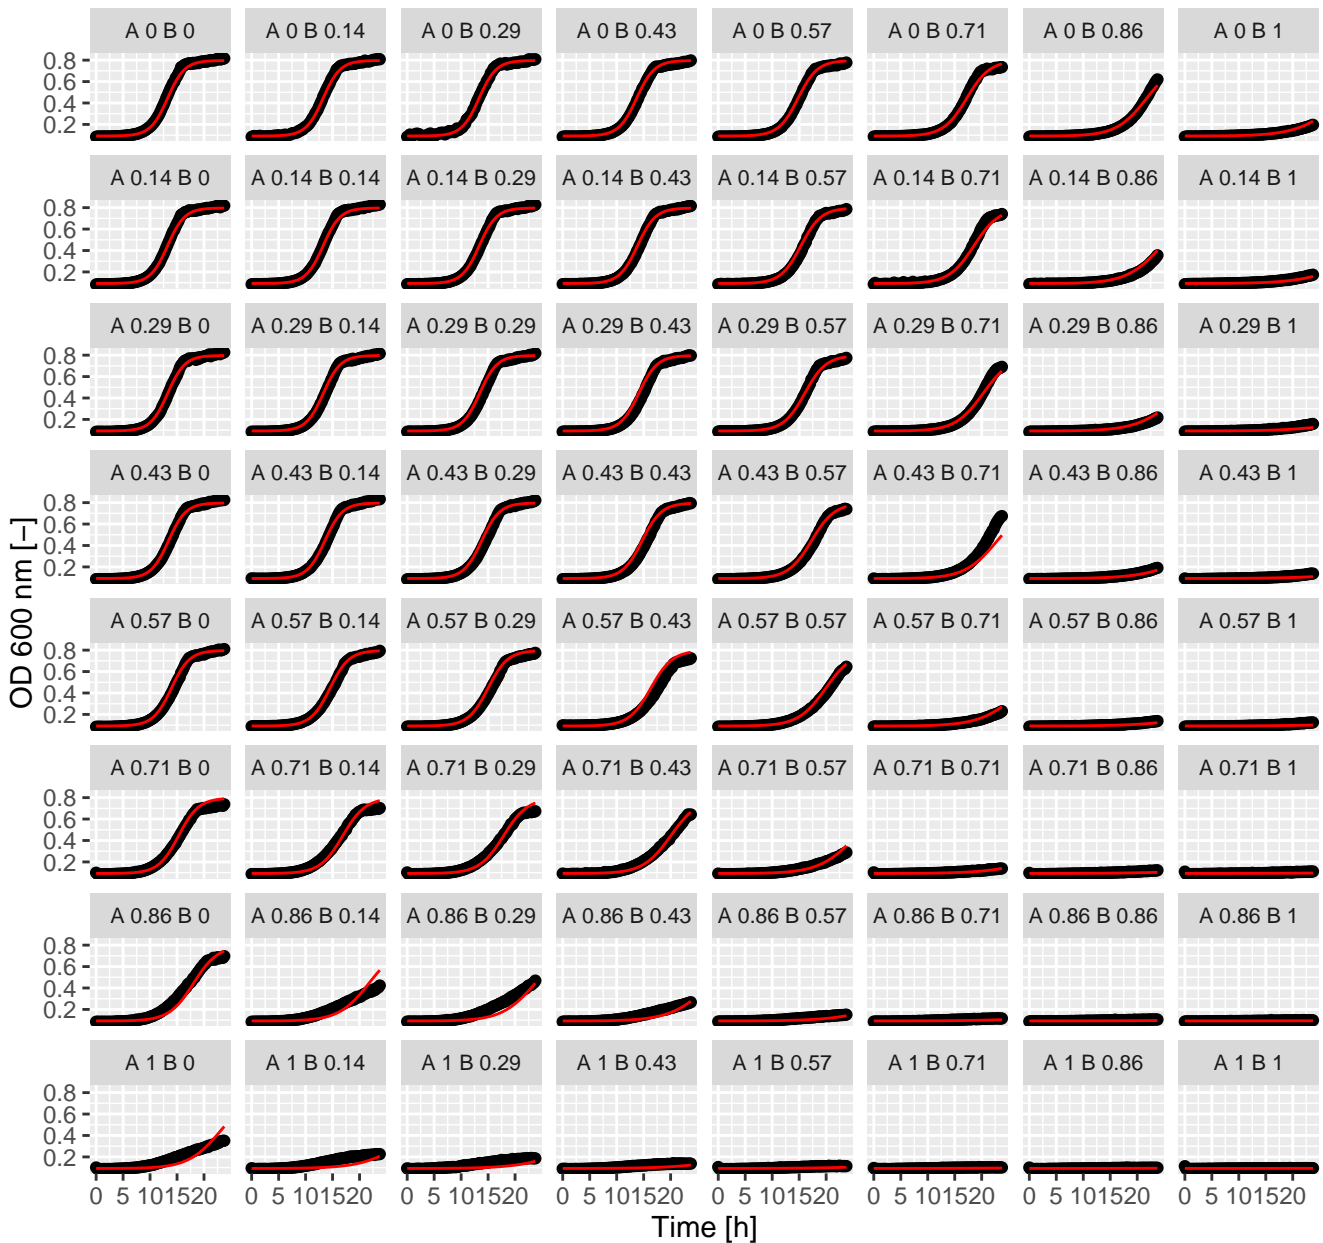

Cal.Hal (= Ax.Bx) exp. additivity (BI)  
Int\_AB = 0 and Int\_BA = 0 at EC50

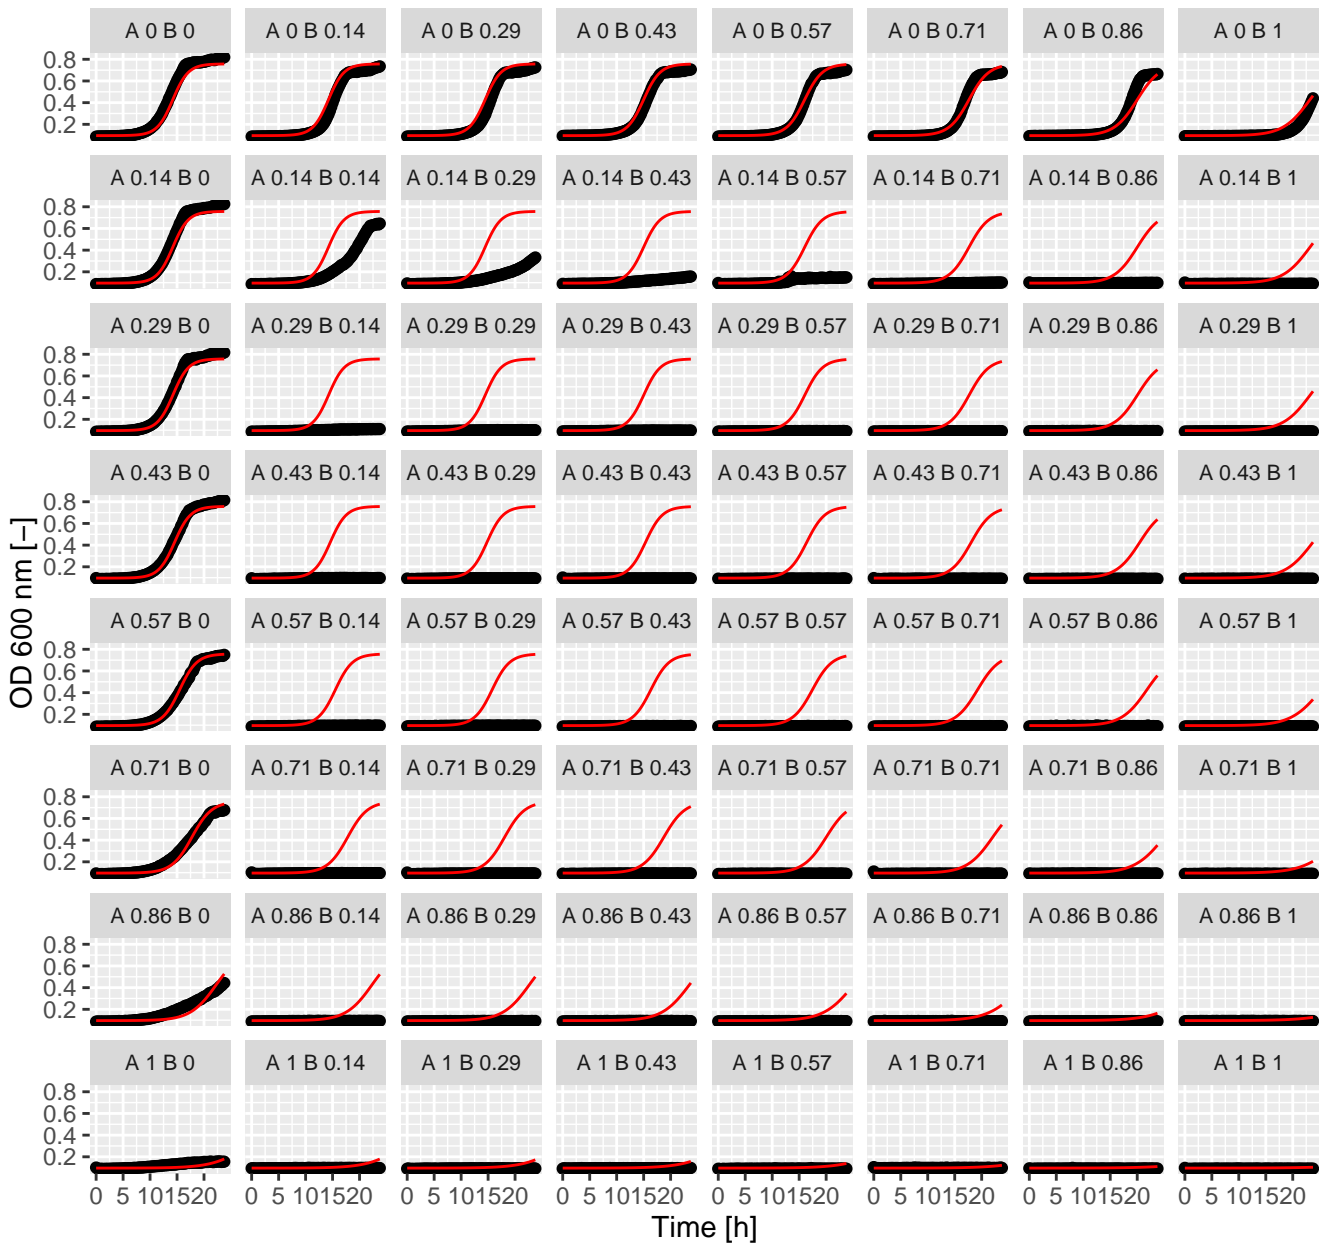

Cal.Hal (= Ax.Bx) full GPDI  
 Int\_AB = -0.86 and Int\_BA = -0.29 at EC50

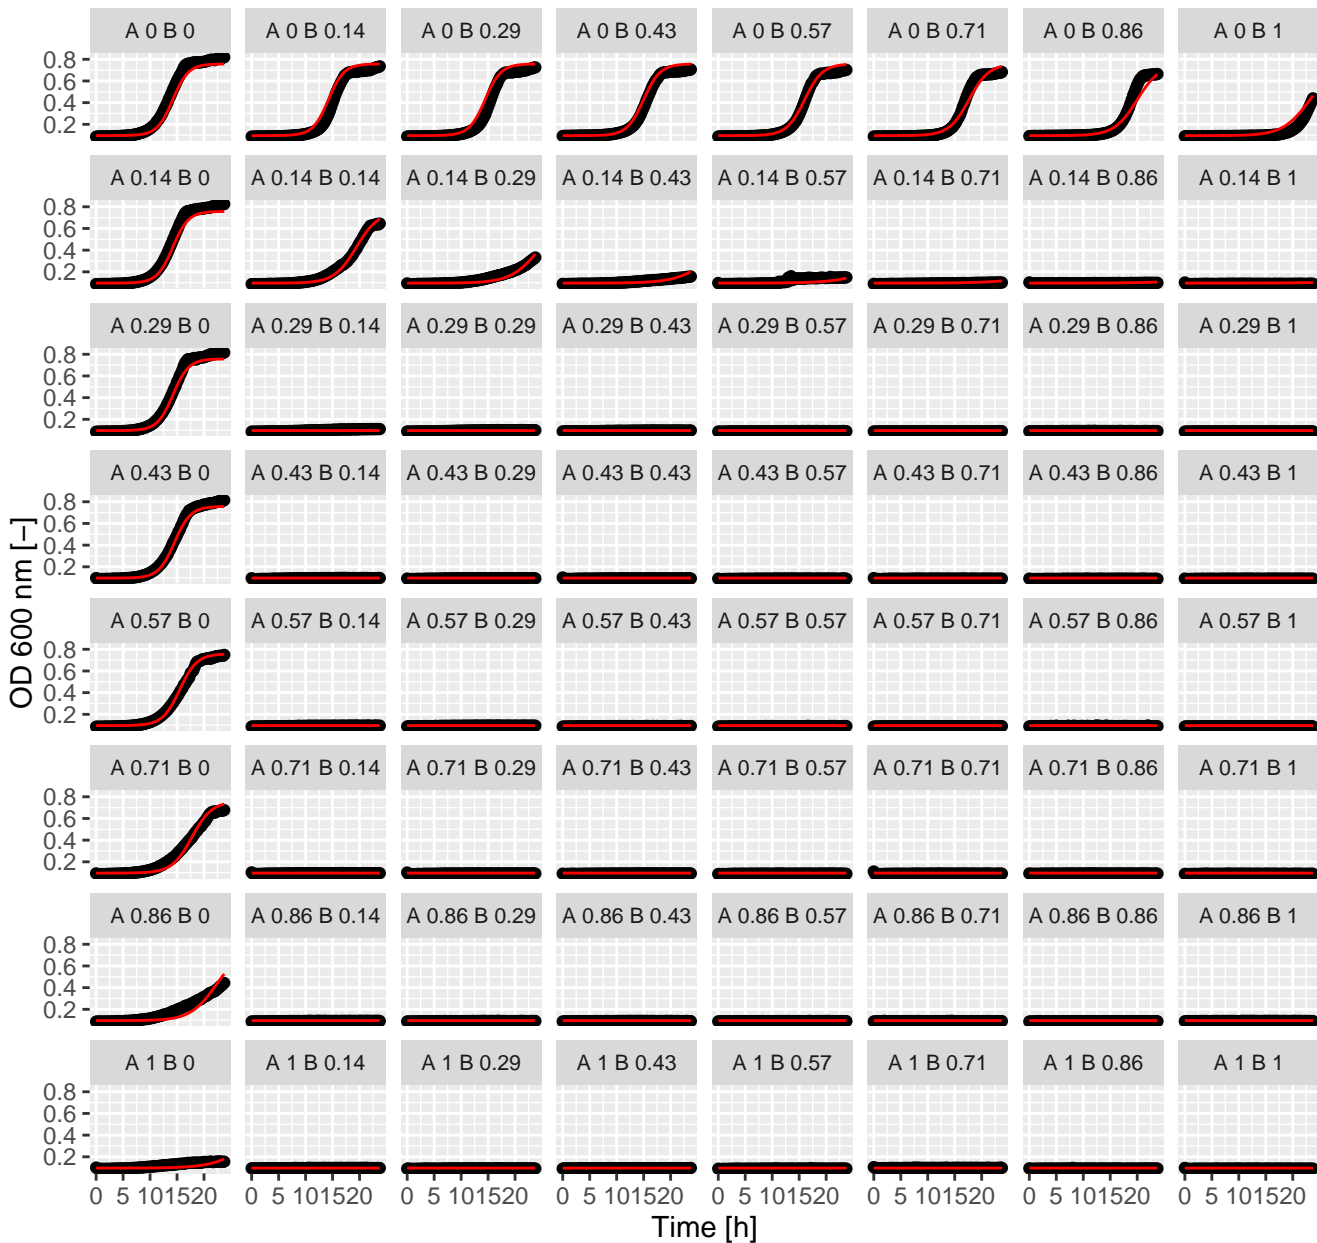



Cal.Fen (= Ax.Bx) exp. additivity (BI)  
 Int\_AB = 0 and Int\_BA = 0 at EC50

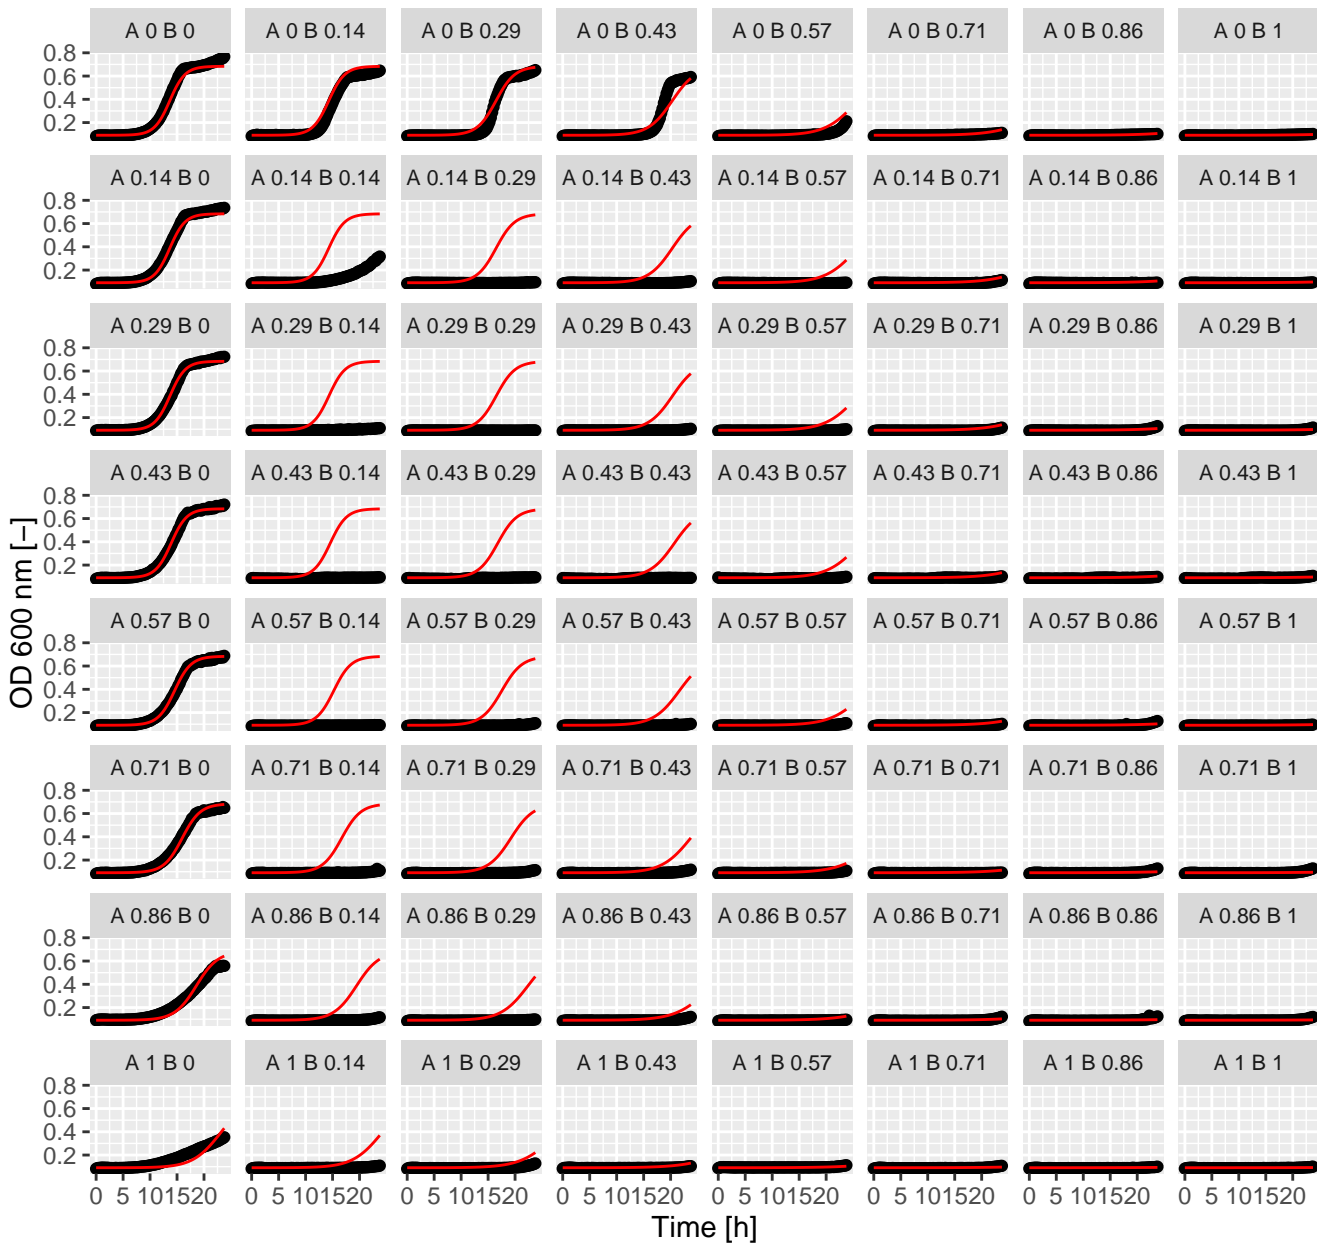

Cal.Fen (= Ax.Bx) full GPDI  
Int\_AB = -0.87 and Int\_BA = -0.85 at EC50

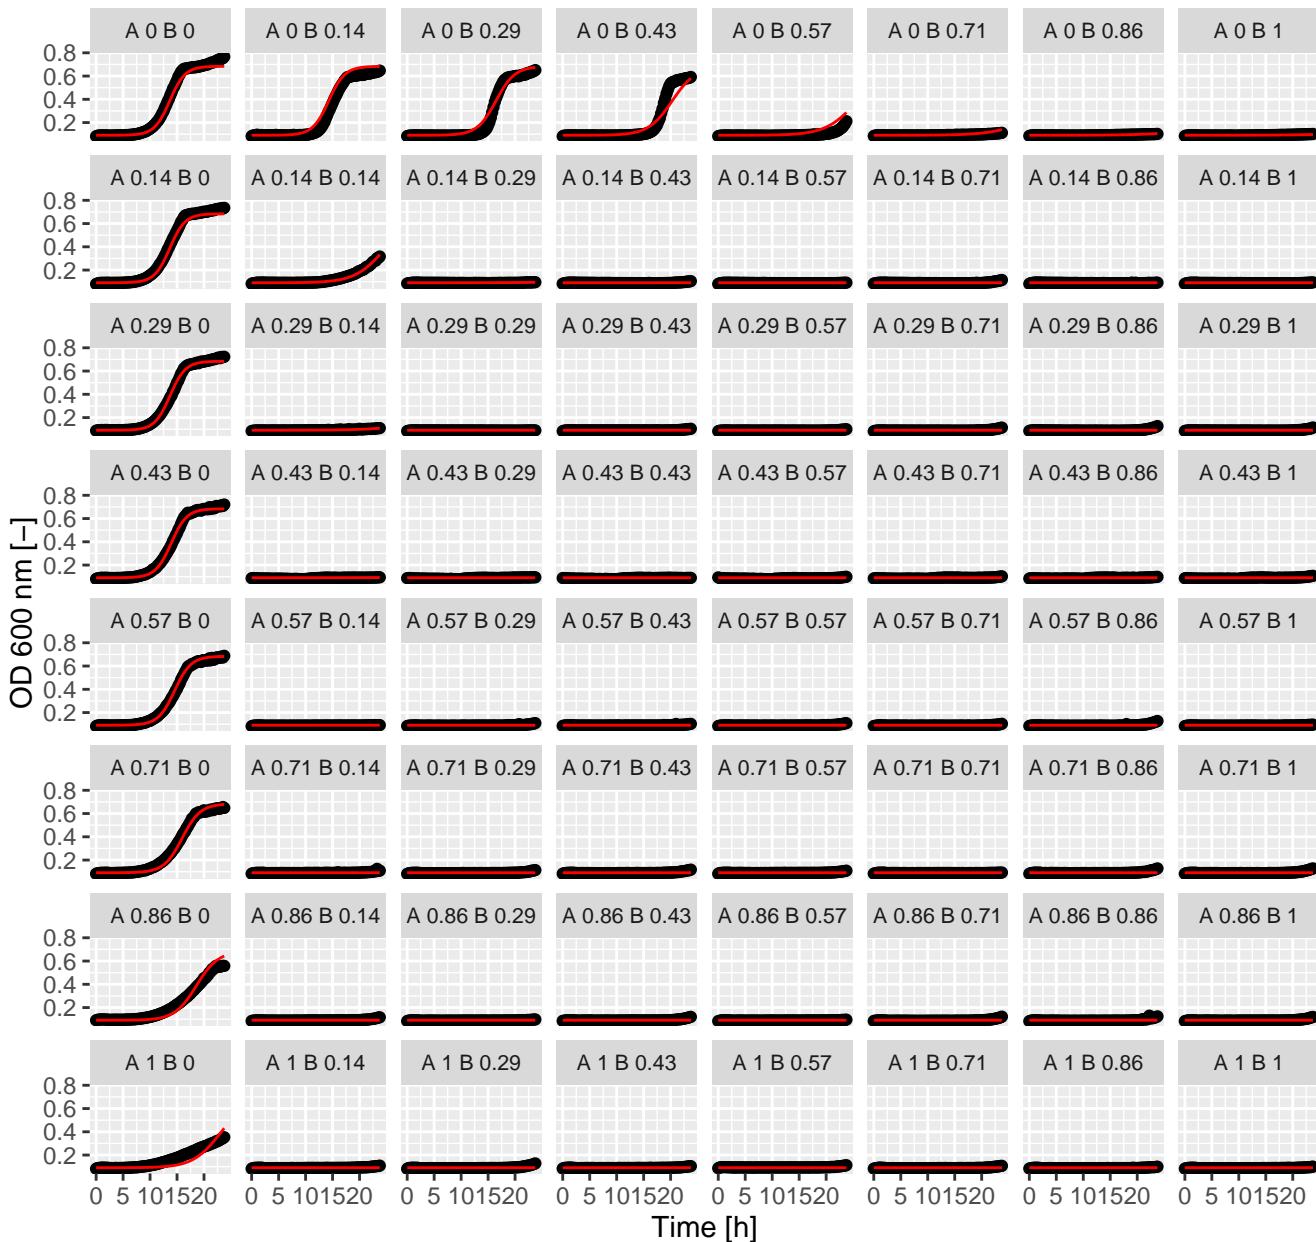

Cal.Dyc (= Ax.Bx) exp. additivity (BI)  
Int\_AB = 0 and Int\_BA = 0 at EC50

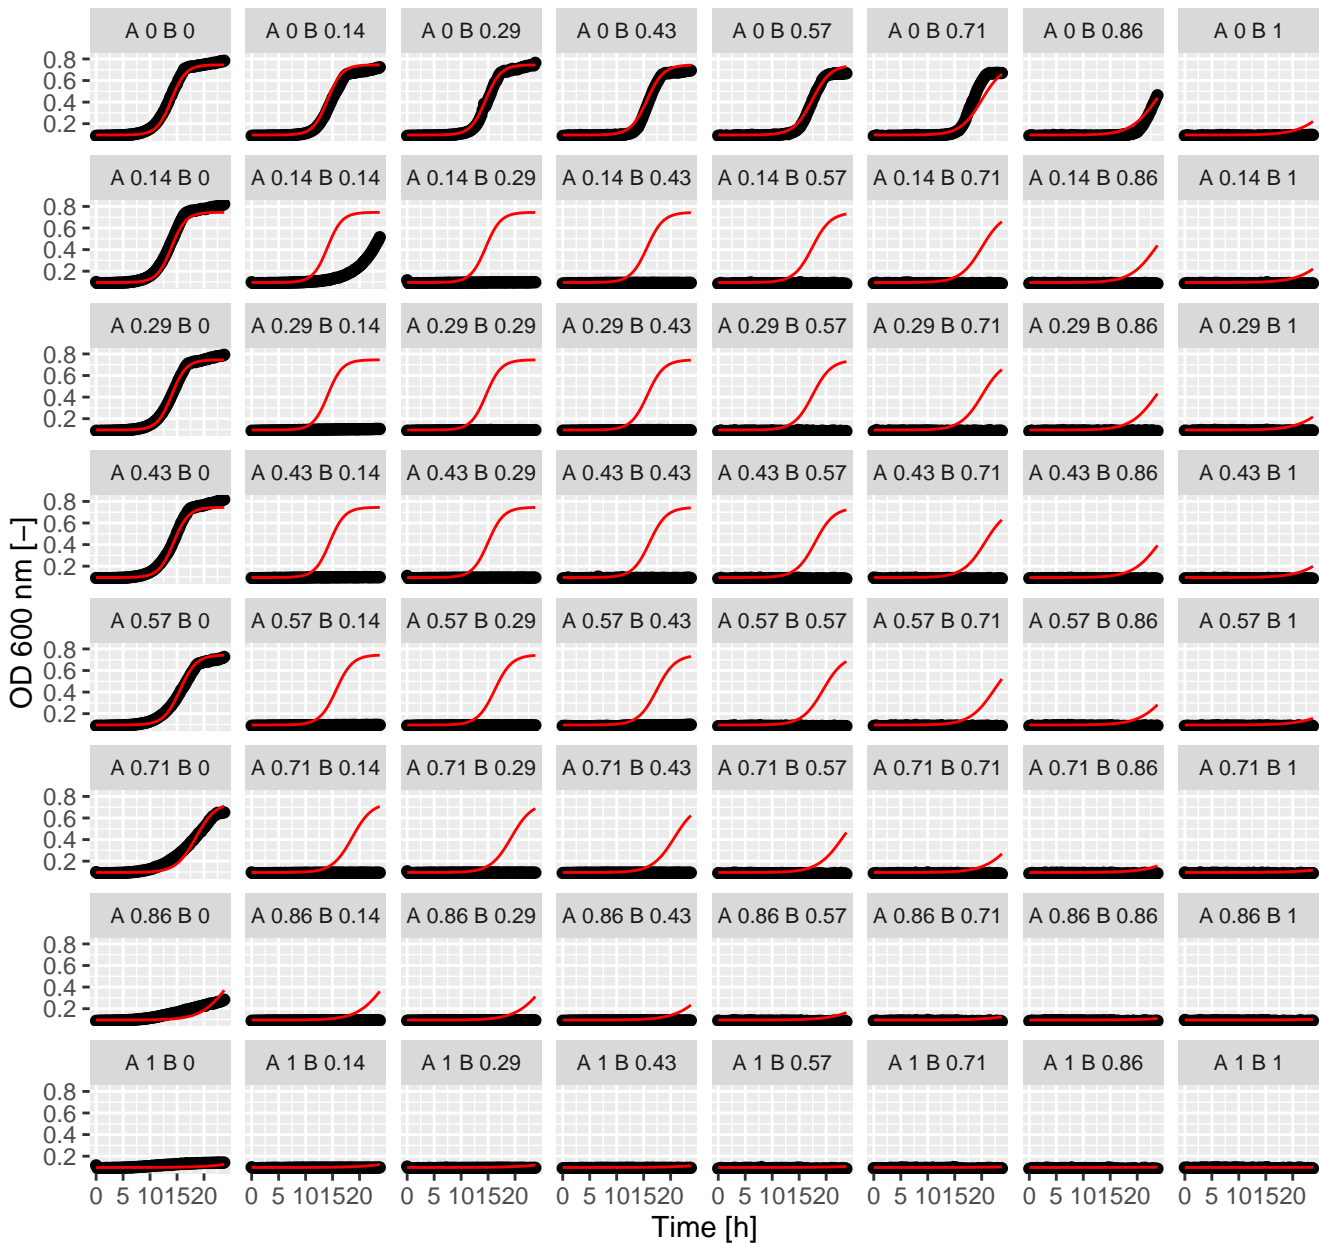

Cal.Dyc (= Ax.Bx) full GPDI  
Int\_AB = -0.96 and Int\_BA = -0.79 at EC50

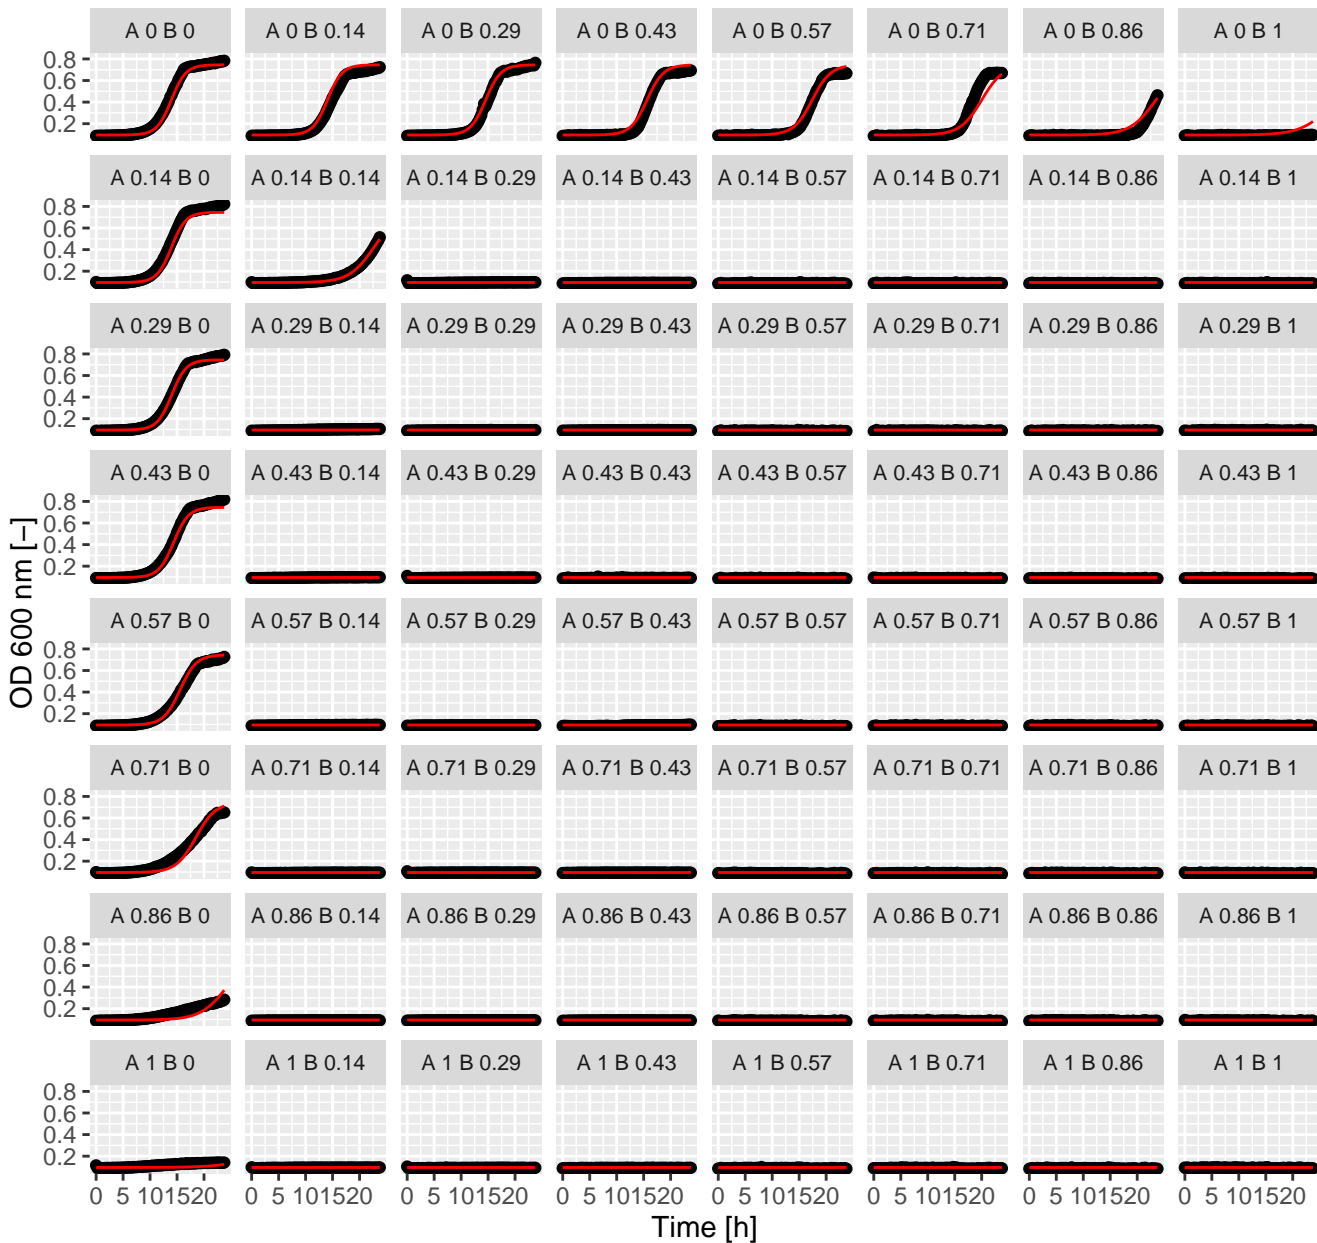

Cal.Cal (= Ax.Bx) exp. additivity (BI)  
 Int\_AB = 0 and Int\_BA = 0 at EC50

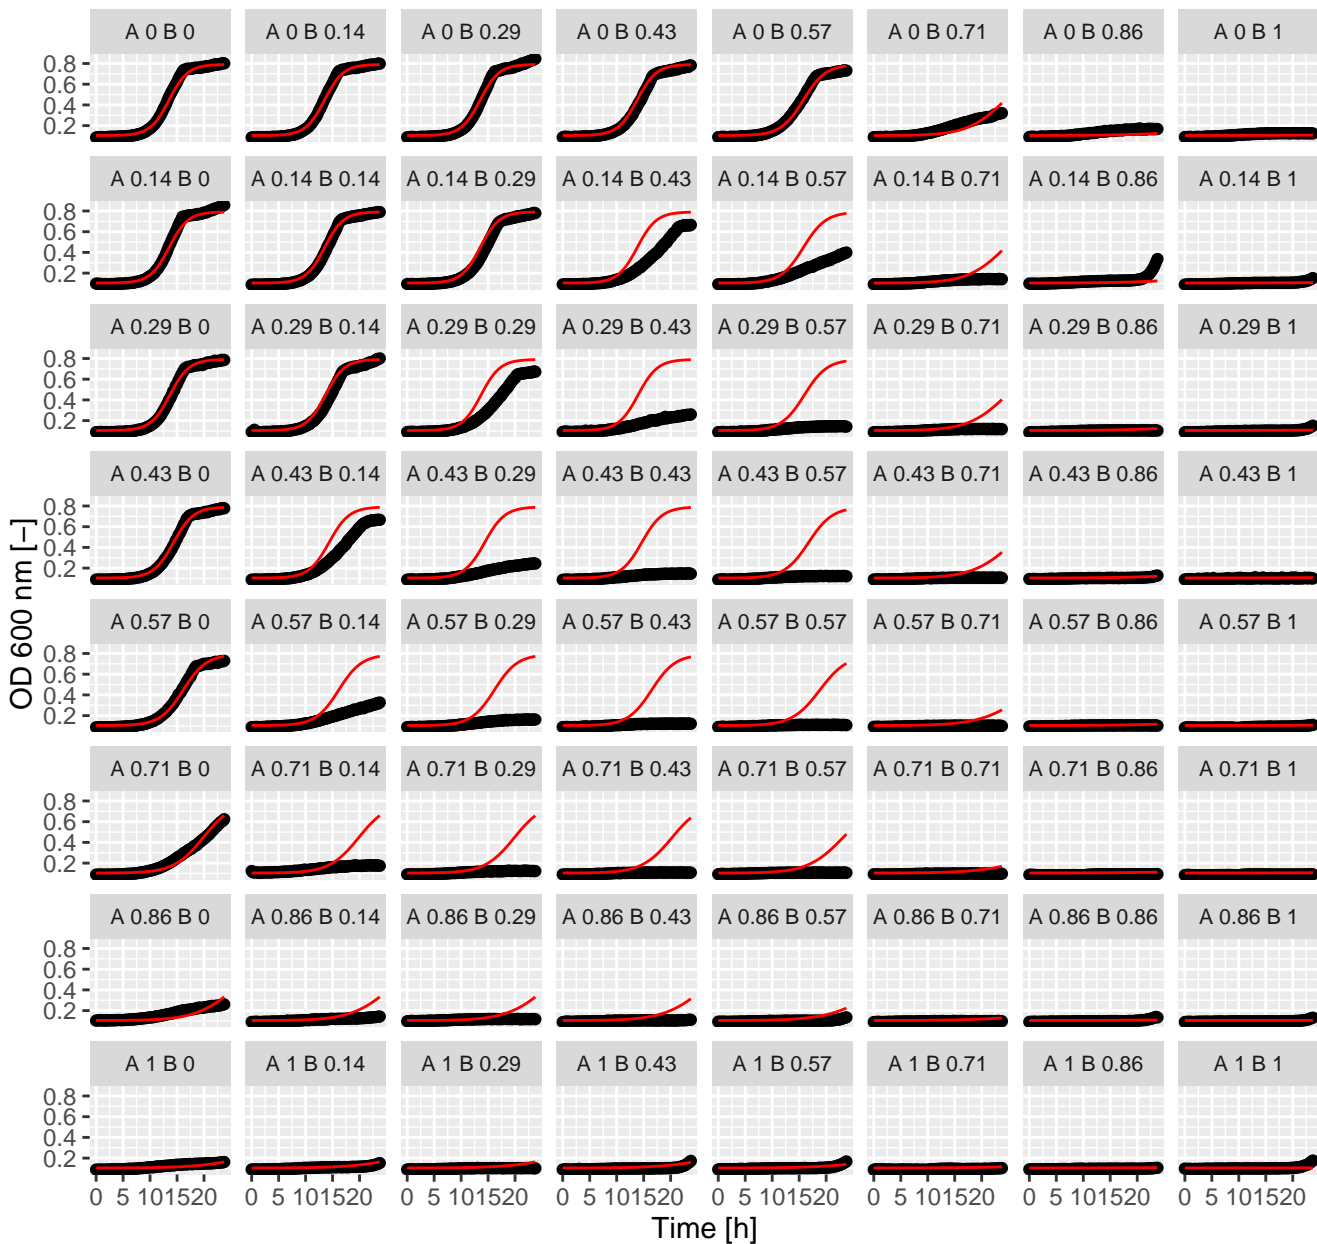

Cal.Cal (= Ax.Bx) full GPDI  
 Int\_AB = -0.72 and Int\_BA = -0.5 at EC50

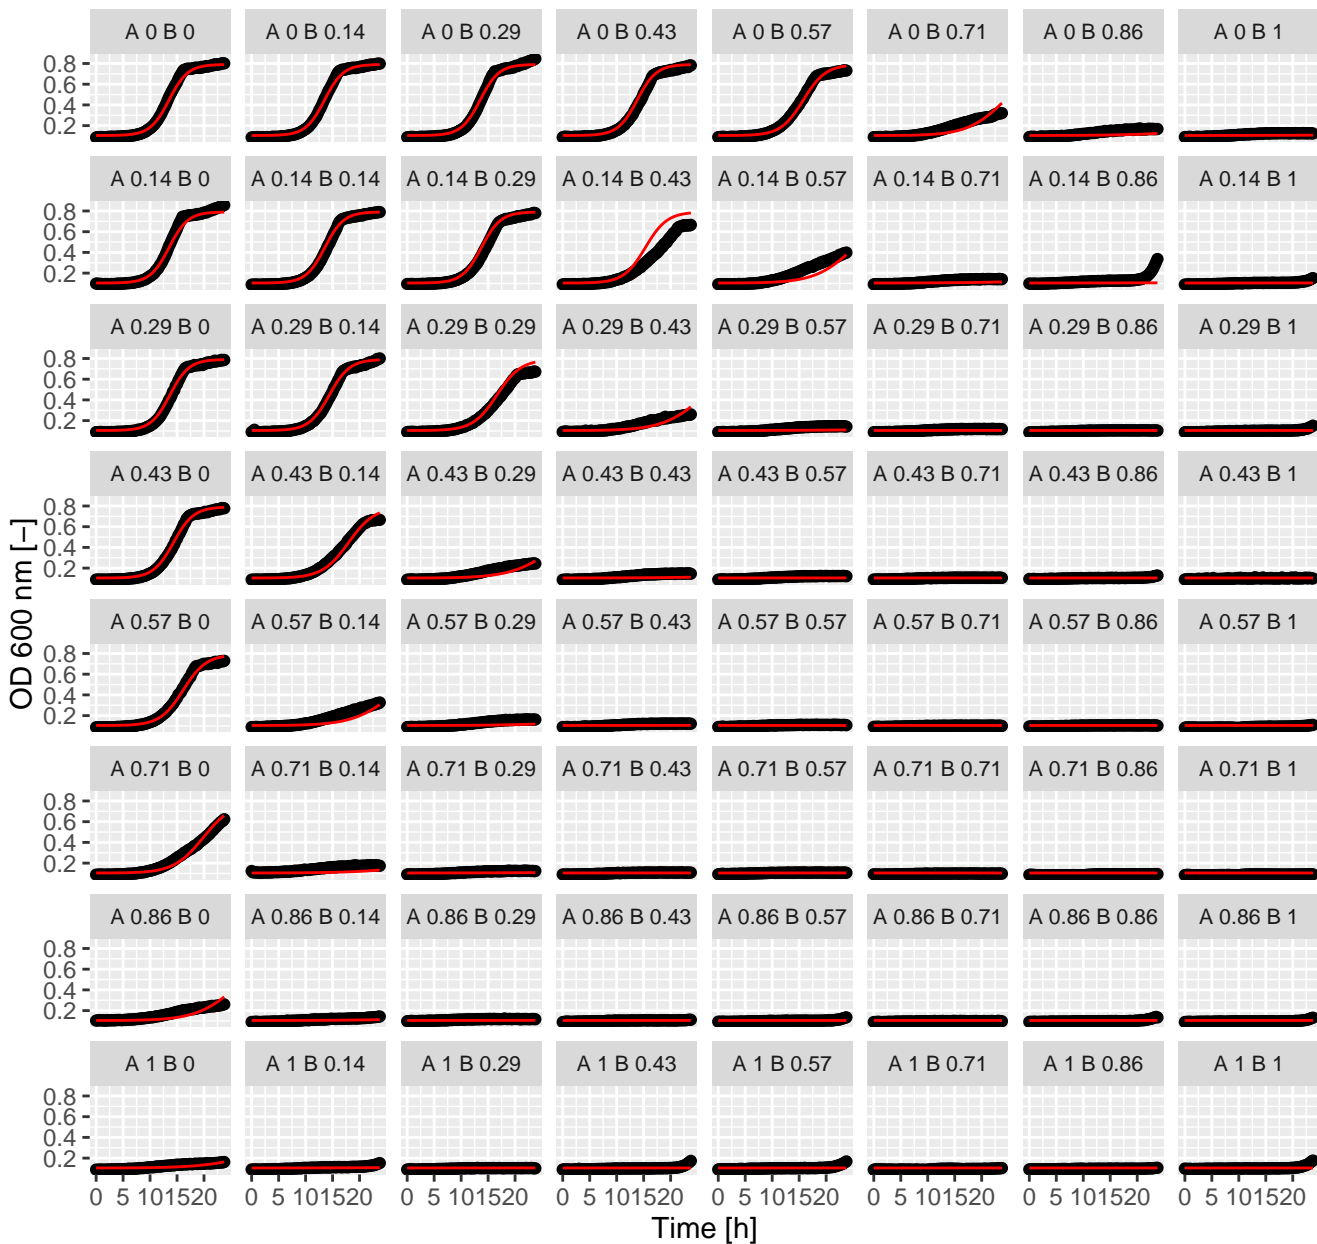

C3P.Ter (= Ax.Bx) exp. additivity (BI)  
Int\_AB = 0 and Int\_BA = 0 at EC50

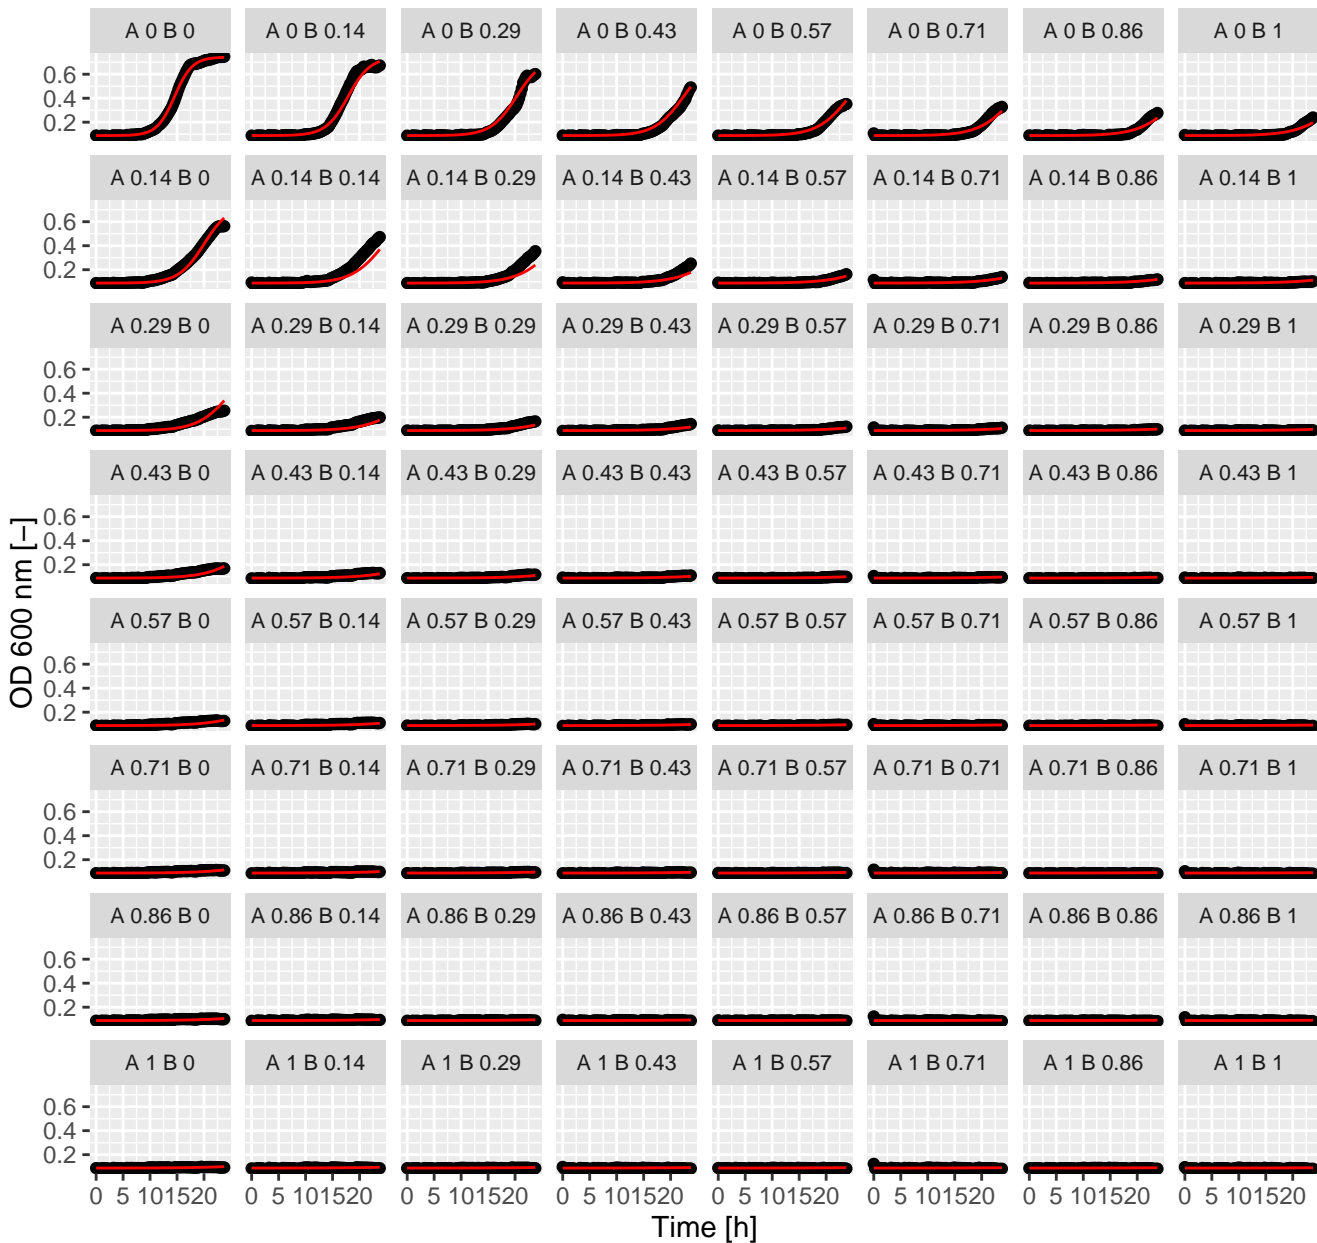

C3P.Ter (= Ax.Bx) full GPDI  
Int\_AB = 0.33 and Int\_BA = 0.11 at EC50

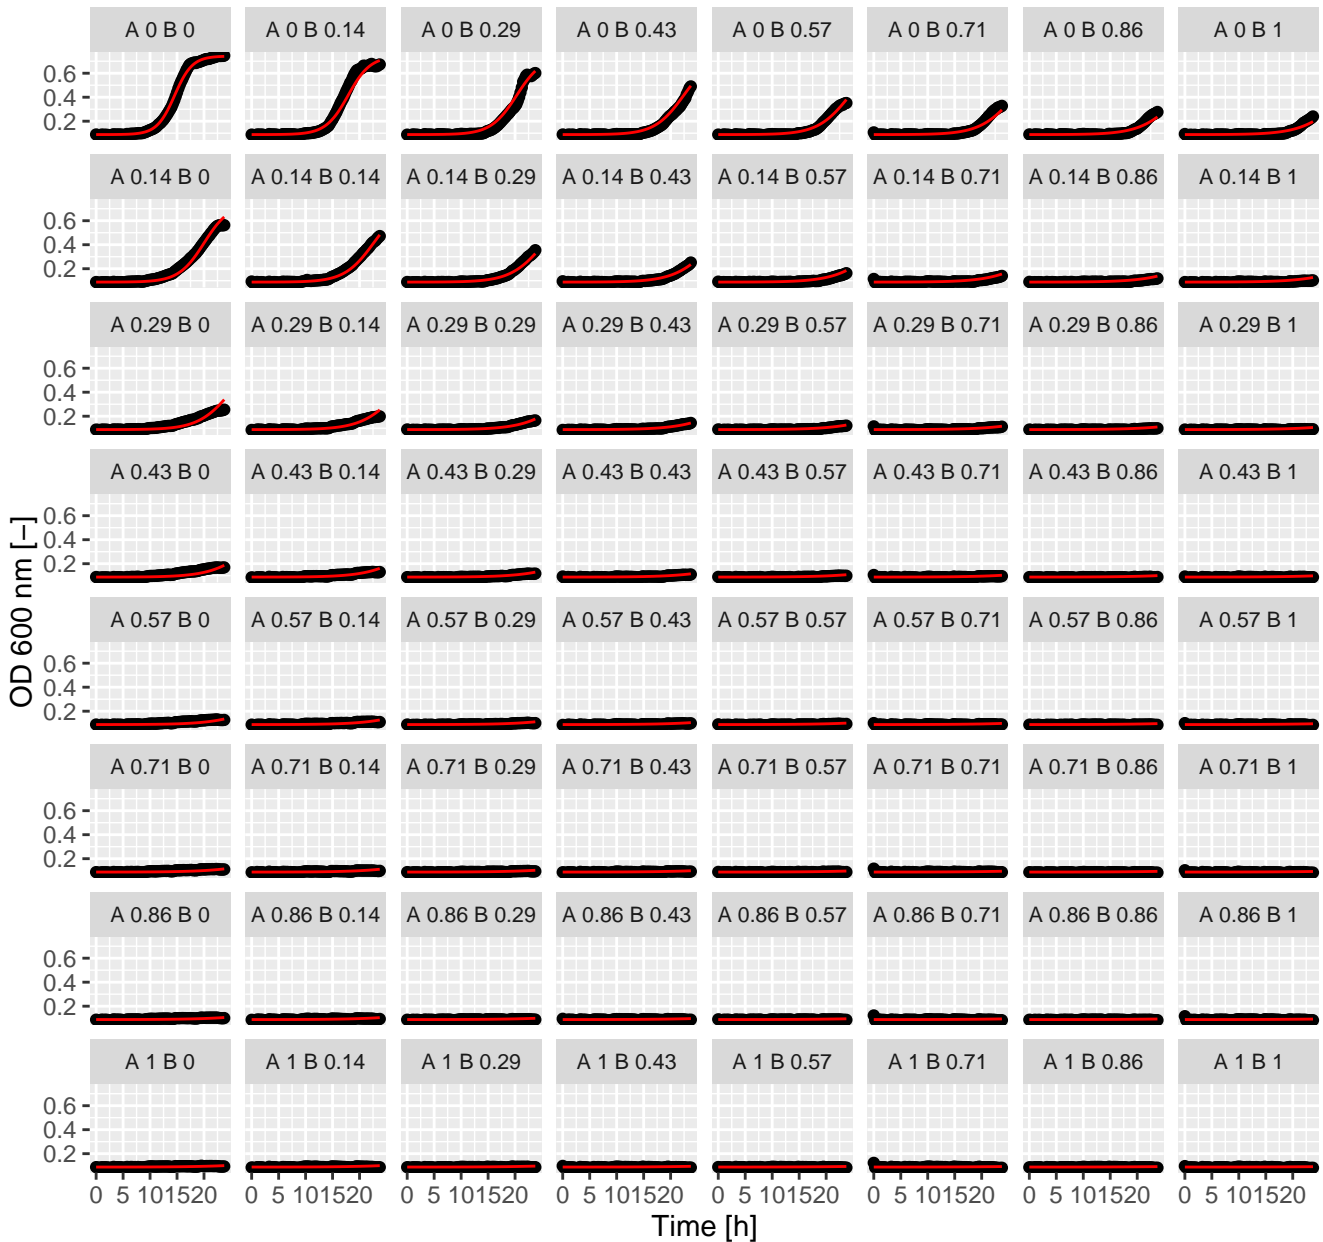



C3P.Tac (= Ax.Bx) exp. additivity (BI)  
Int\_AB = 0 and Int\_BA = 0 at EC50

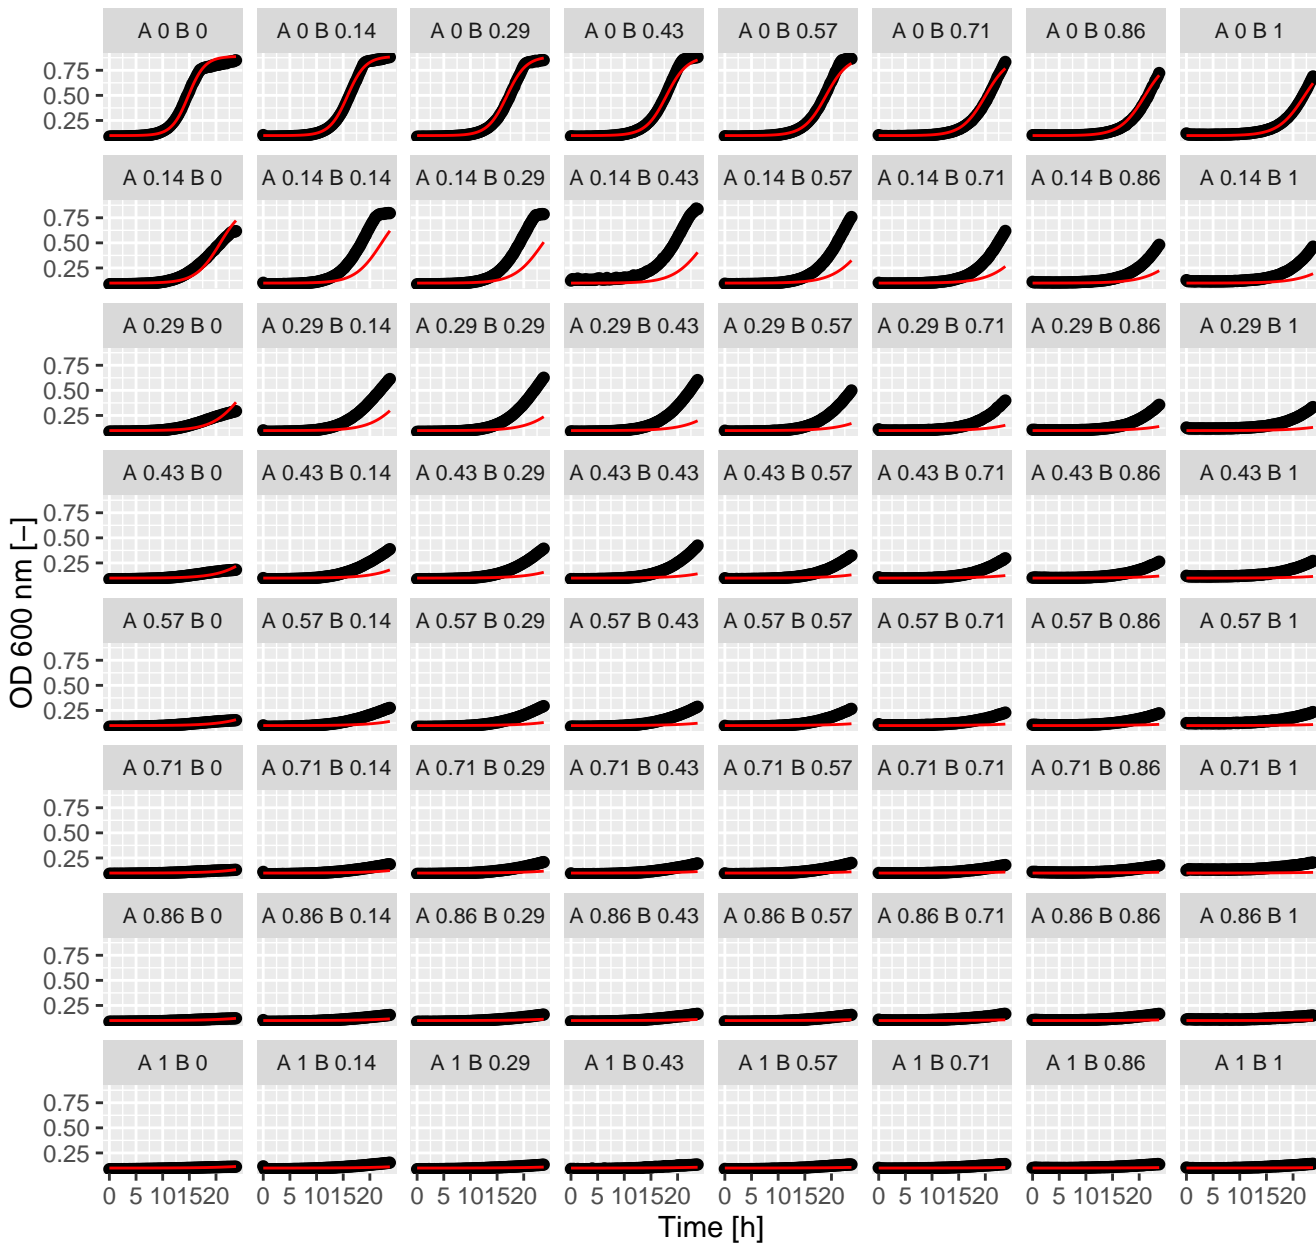

C3P.Tac (= Ax.Bx) full GPDI  
Int\_AB = 2.37 and Int\_BA = 0.25 at EC50

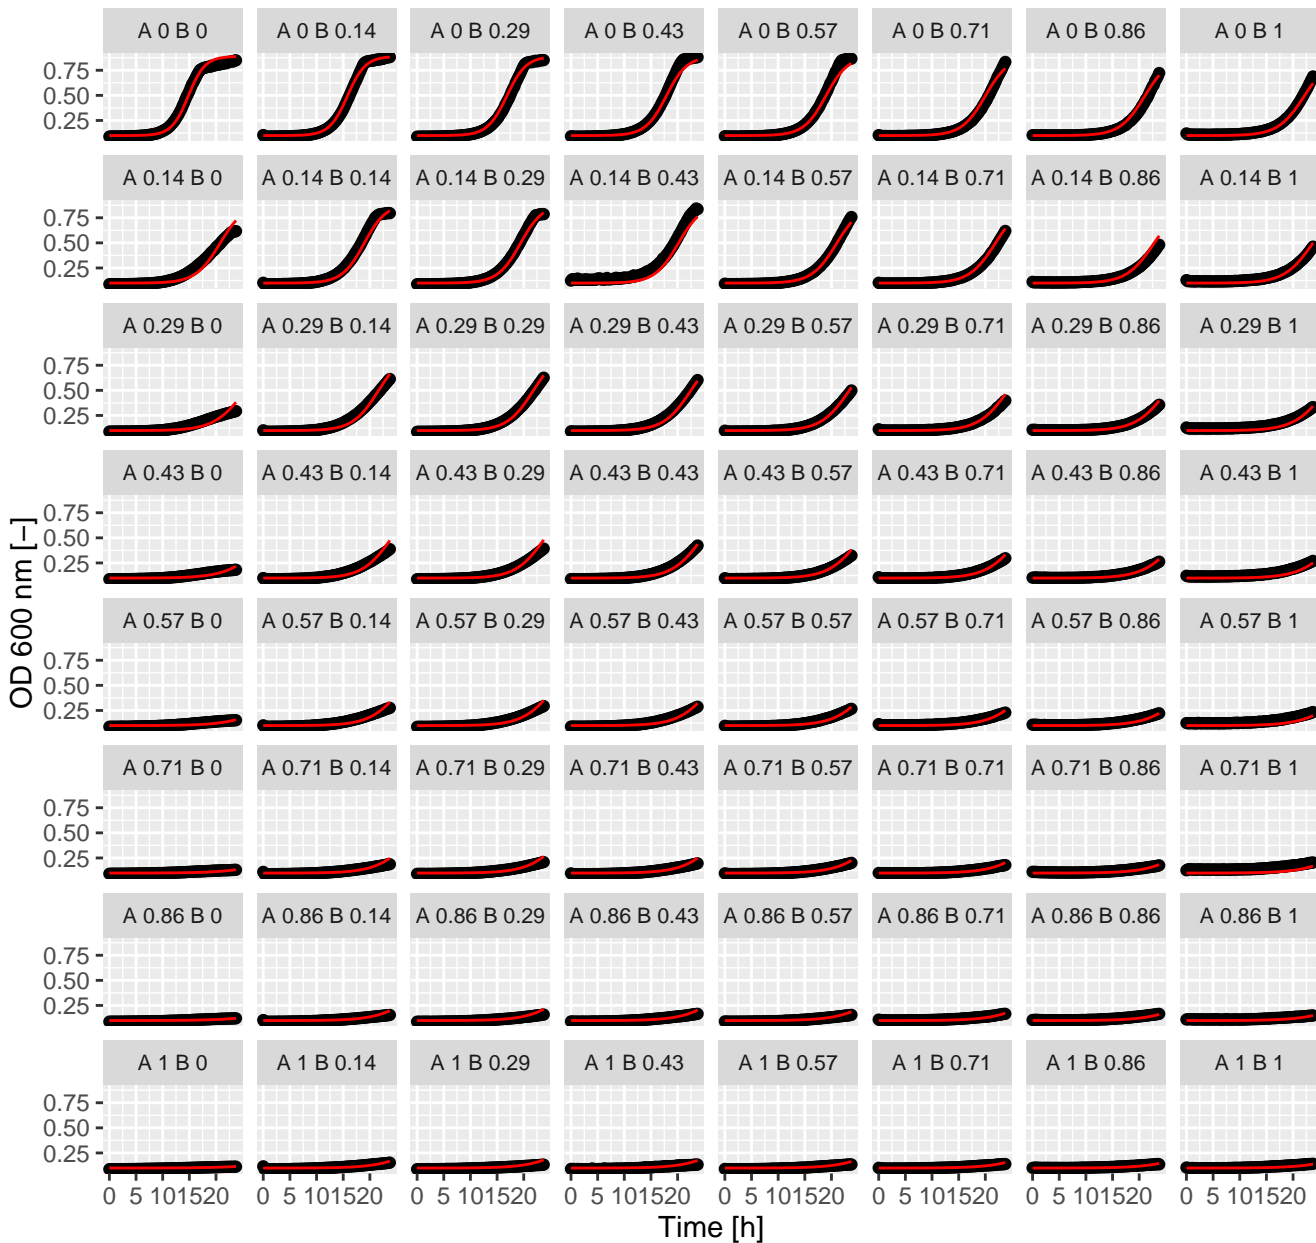

C3P.Sta (= Ax.Bx) exp. additivity (BI)  
Int\_AB = 0 and Int\_BA = 0 at EC50

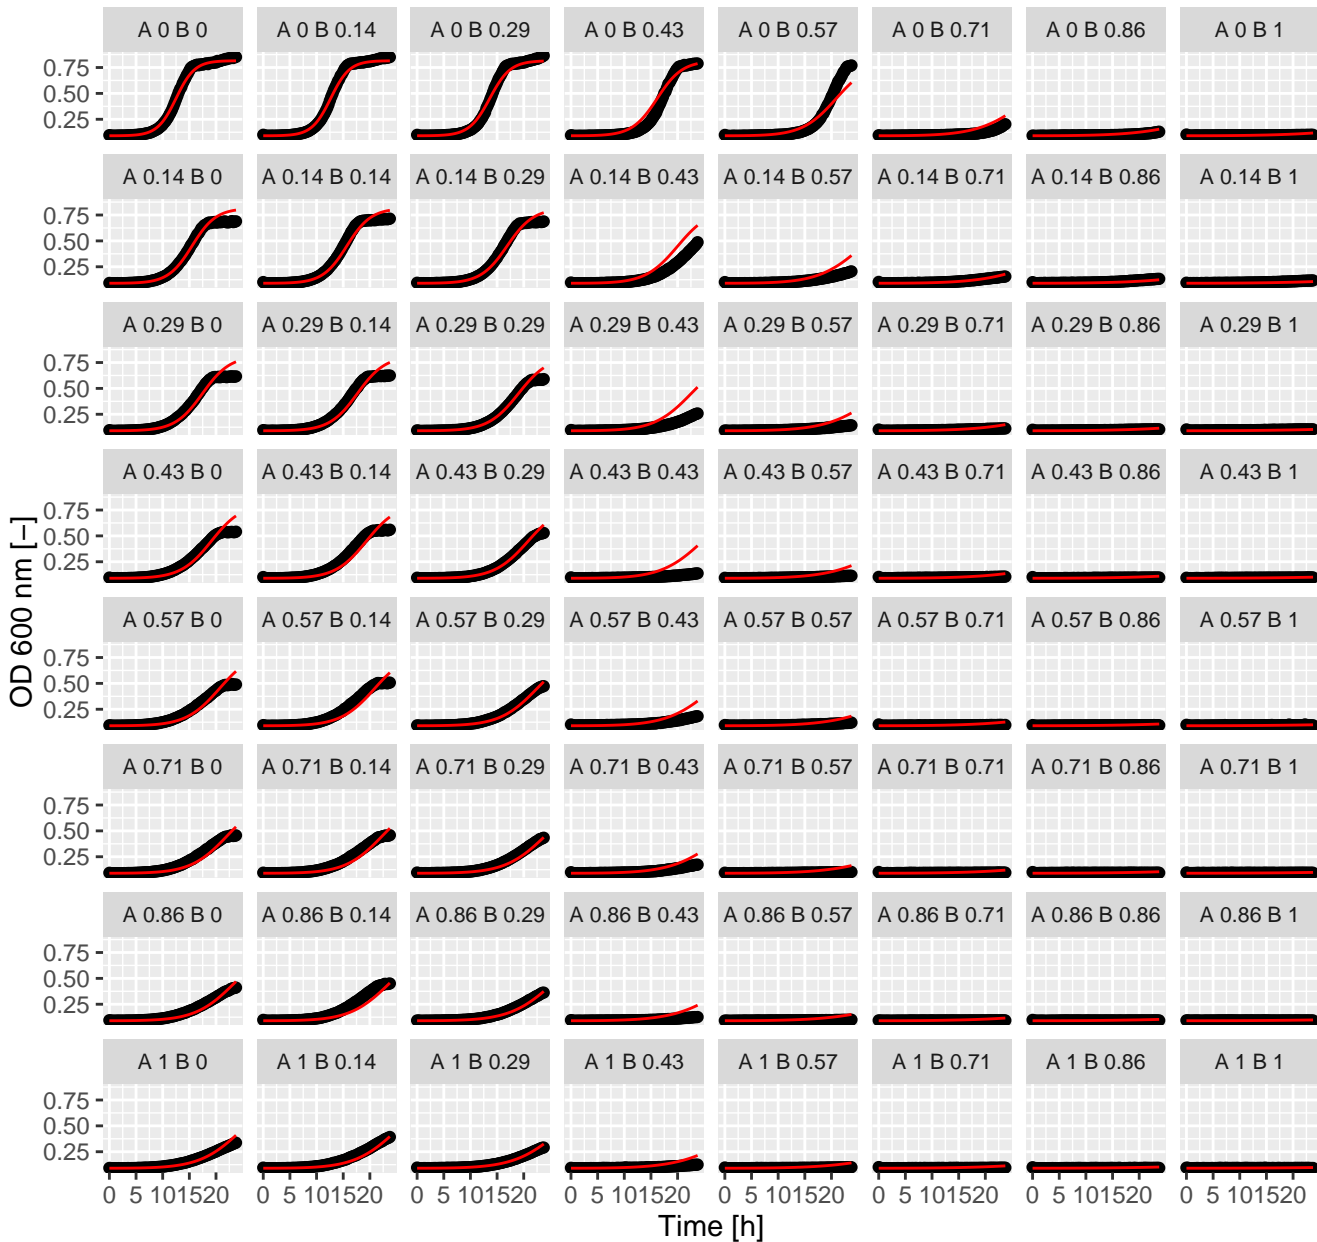

C3P.Sta (= Ax.Bx) full GPDI  
Int\_AB = 1.37 and Int\_BA = -0.32 at EC50

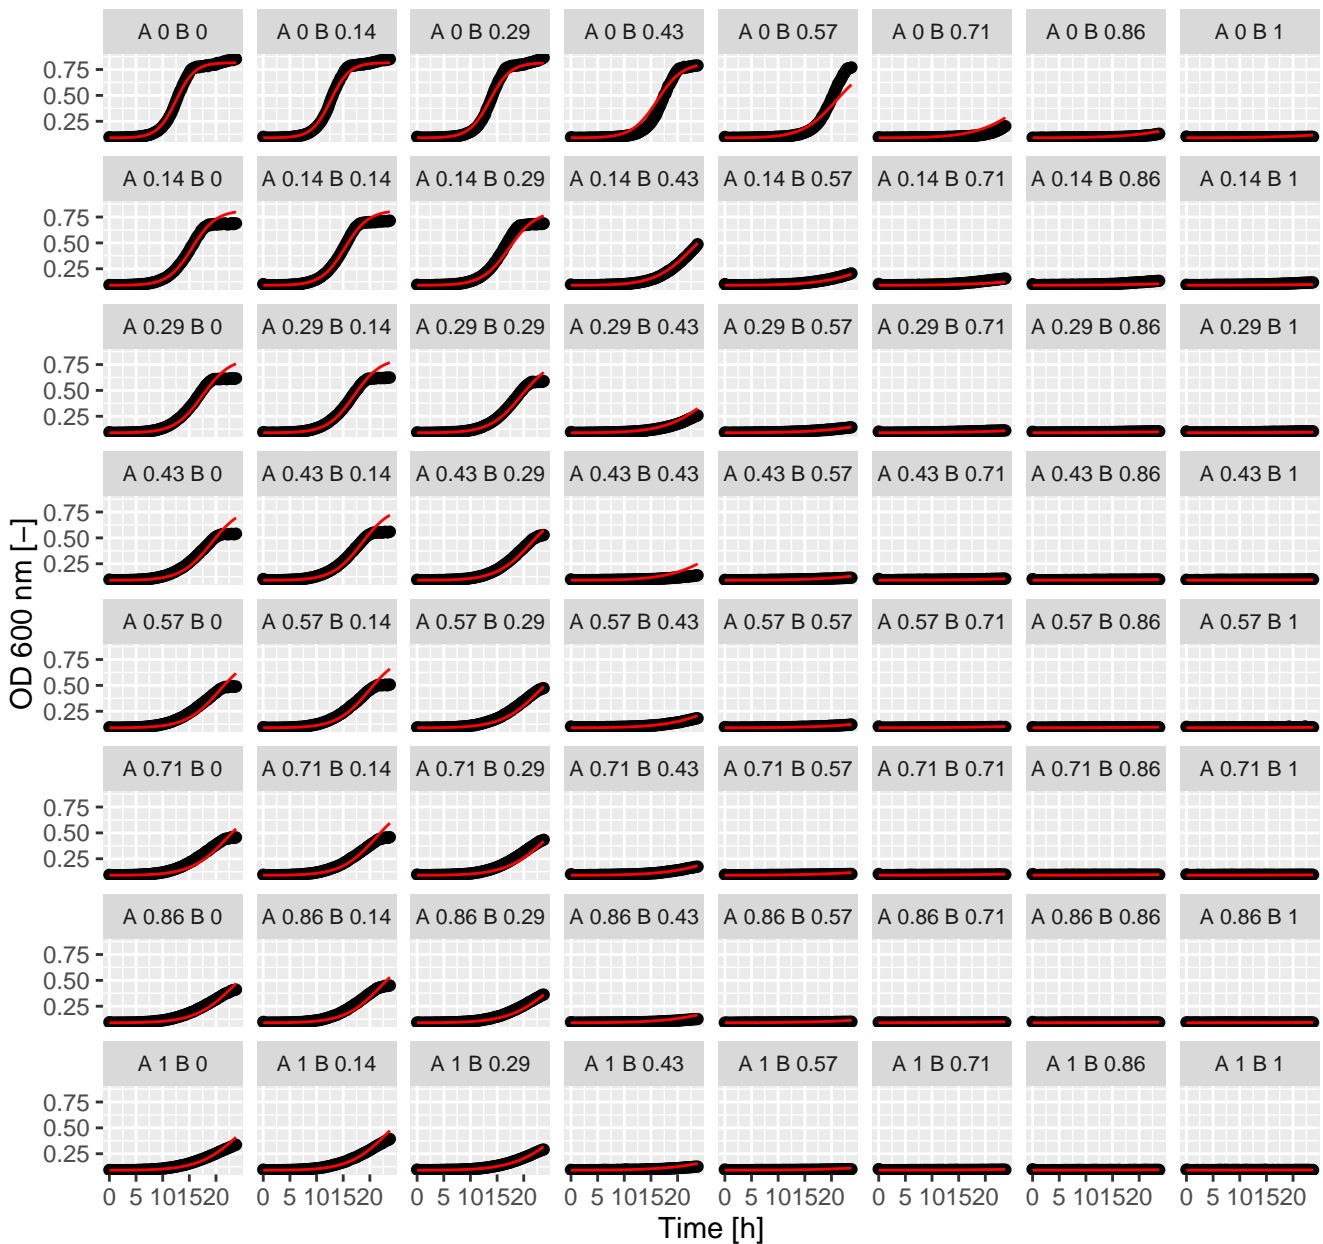

C3P.Pen (= Ax.Bx) exp. additivity (BI)  
Int\_AB = 0 and Int\_BA = 0 at EC50

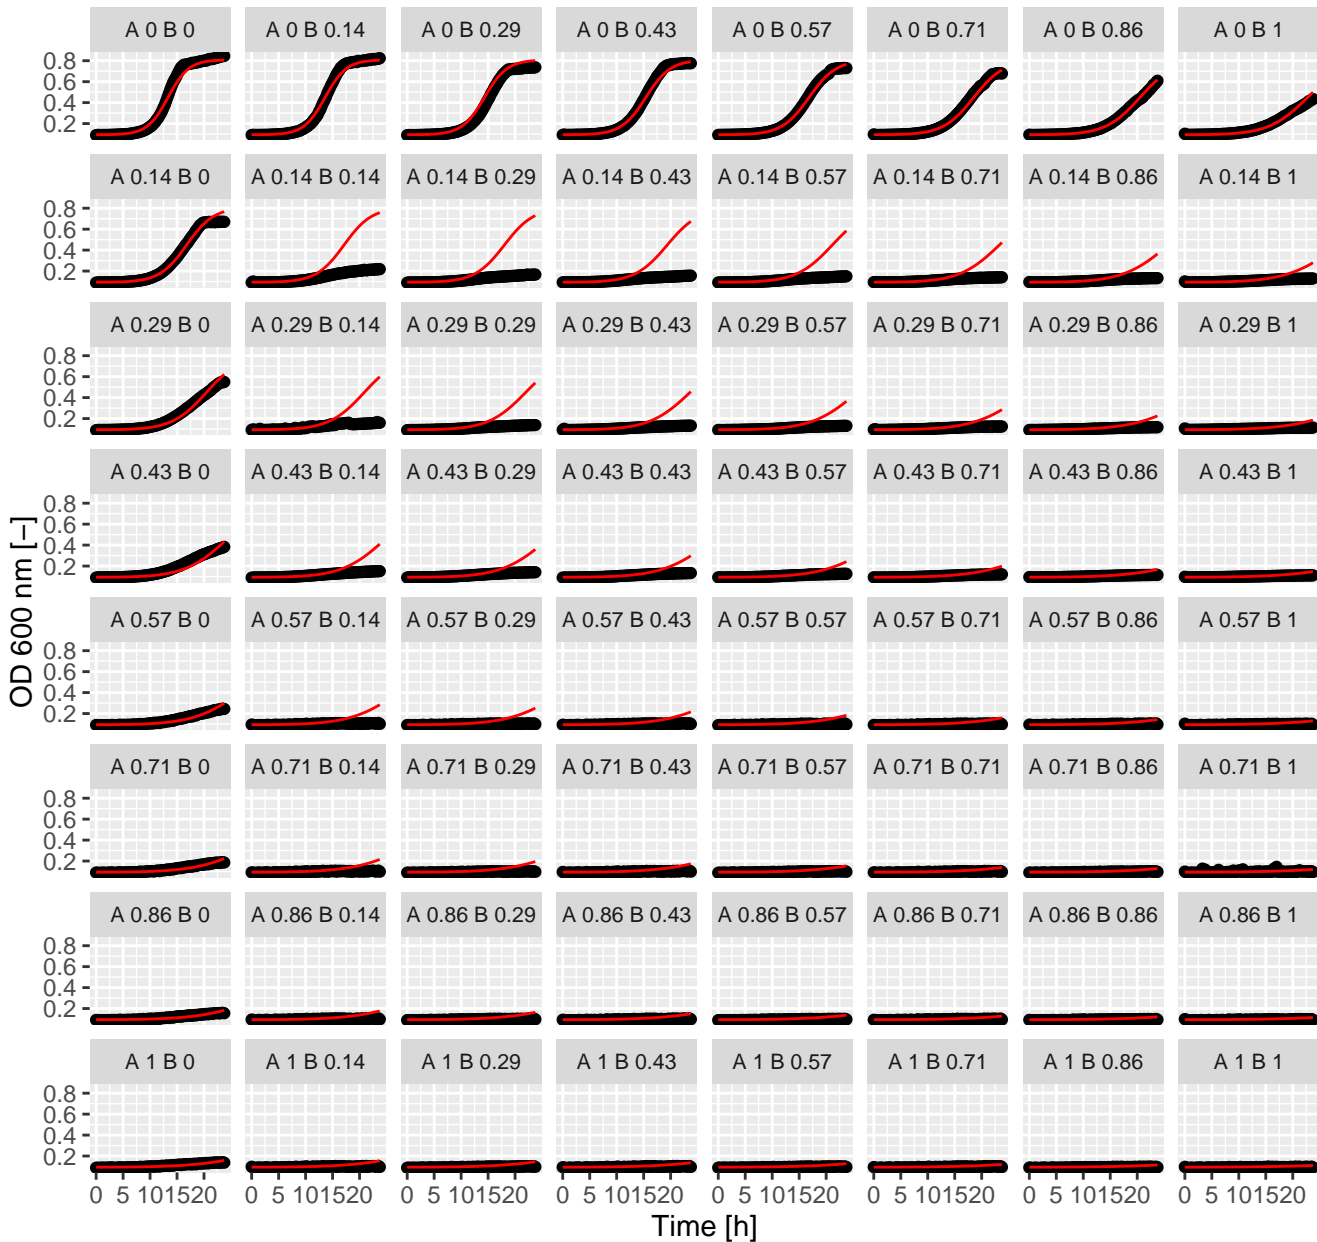

C3P.Pen (= Ax.Bx) full GPD1  
Int\_AB = -0.81 and Int\_BA = 1.37 at EC50

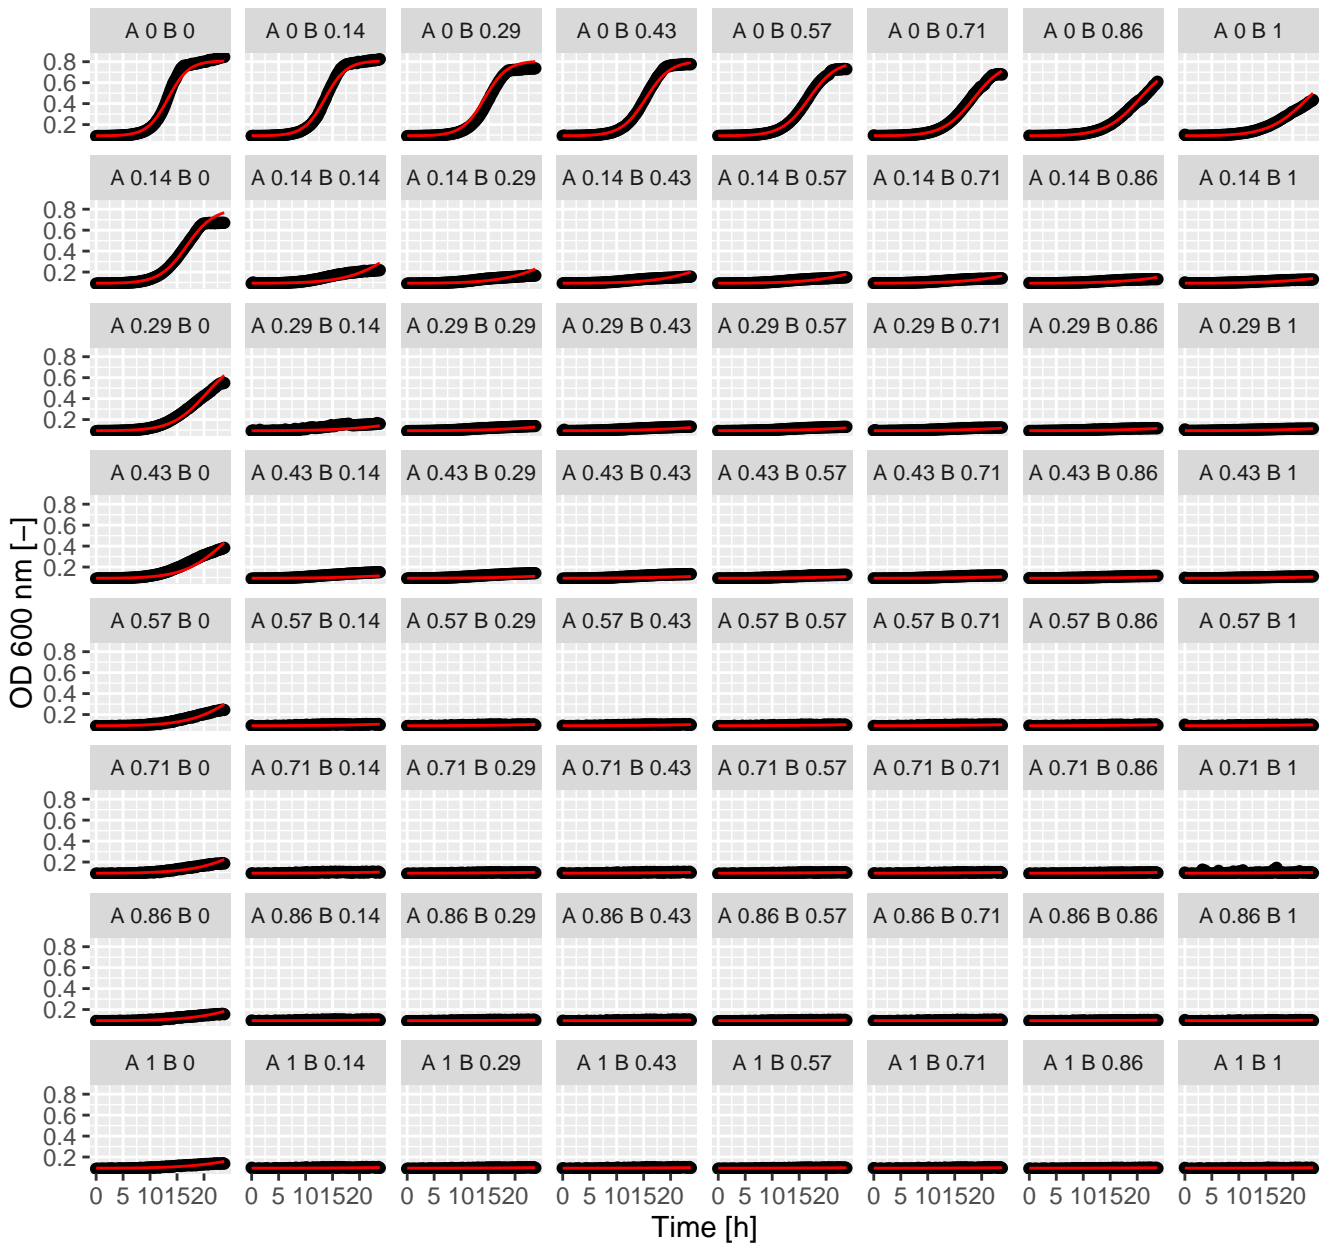

C3P.Lat (= Ax.Bx) exp. additivity (BI)  
Int\_AB = 0 and Int\_BA = 0 at EC50

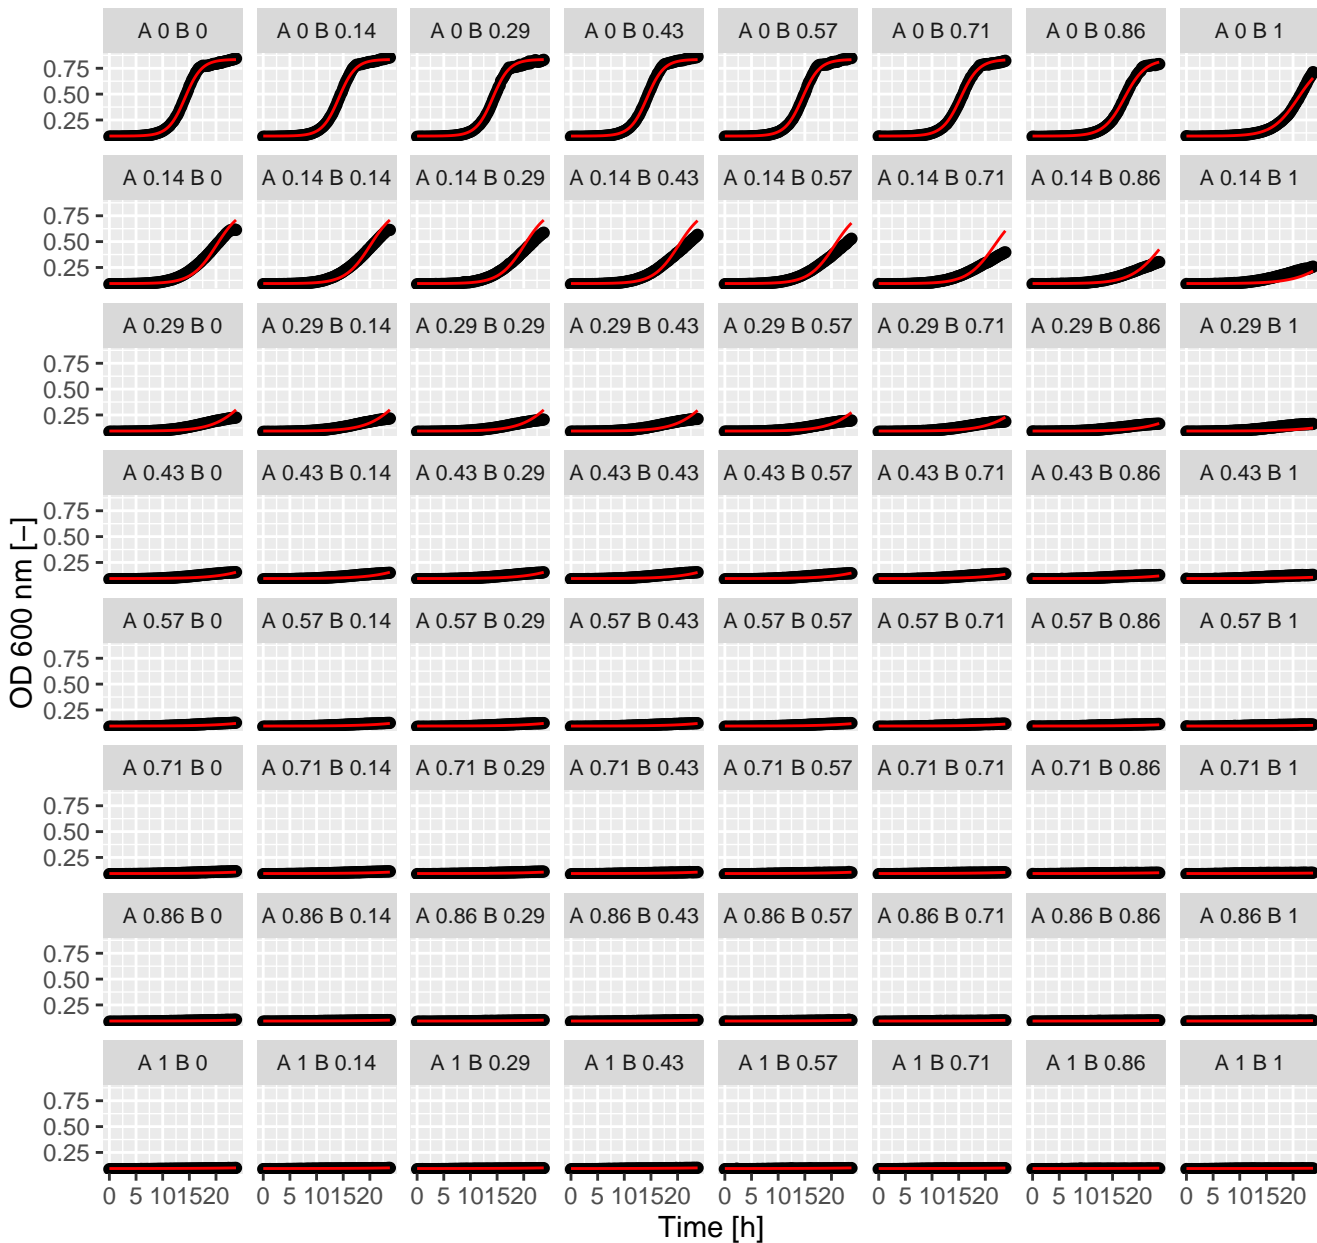

C3P.Lat (= Ax.Bx) full GPD1  
Int\_AB = -0.3 and Int\_BA = 0.28 at EC50

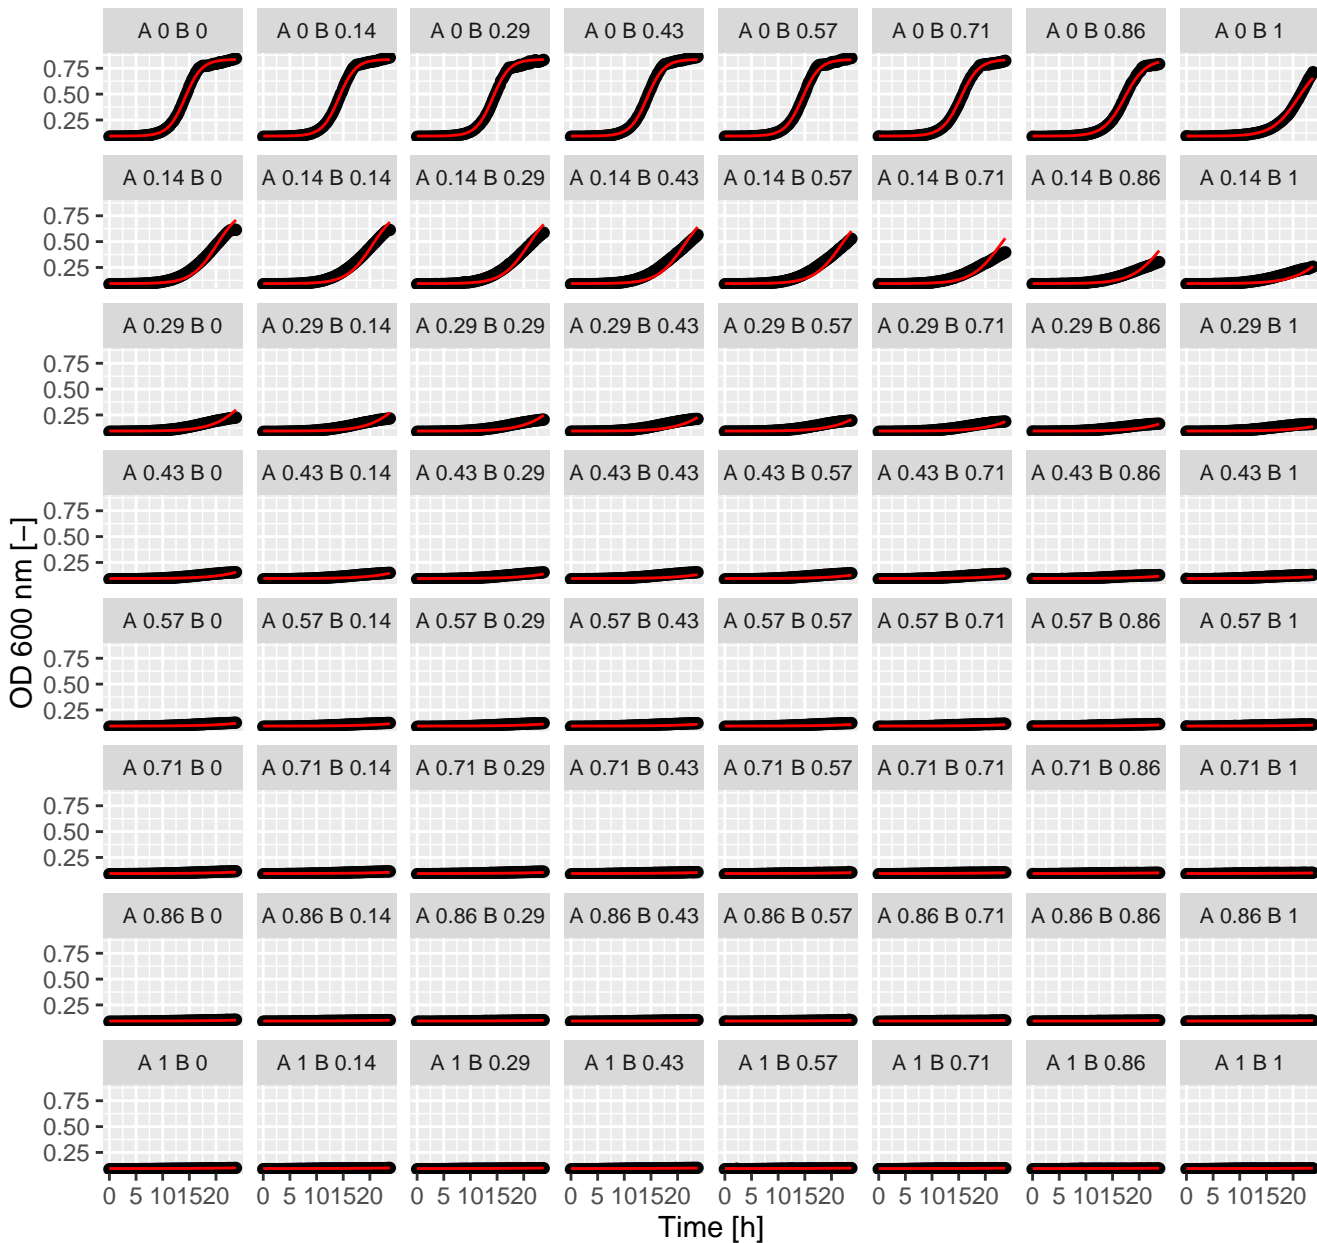



C3P.C3P (= Ax.Bx) exp. additivity (BI)  
Int\_AB = 0 and Int\_BA = 0 at EC50

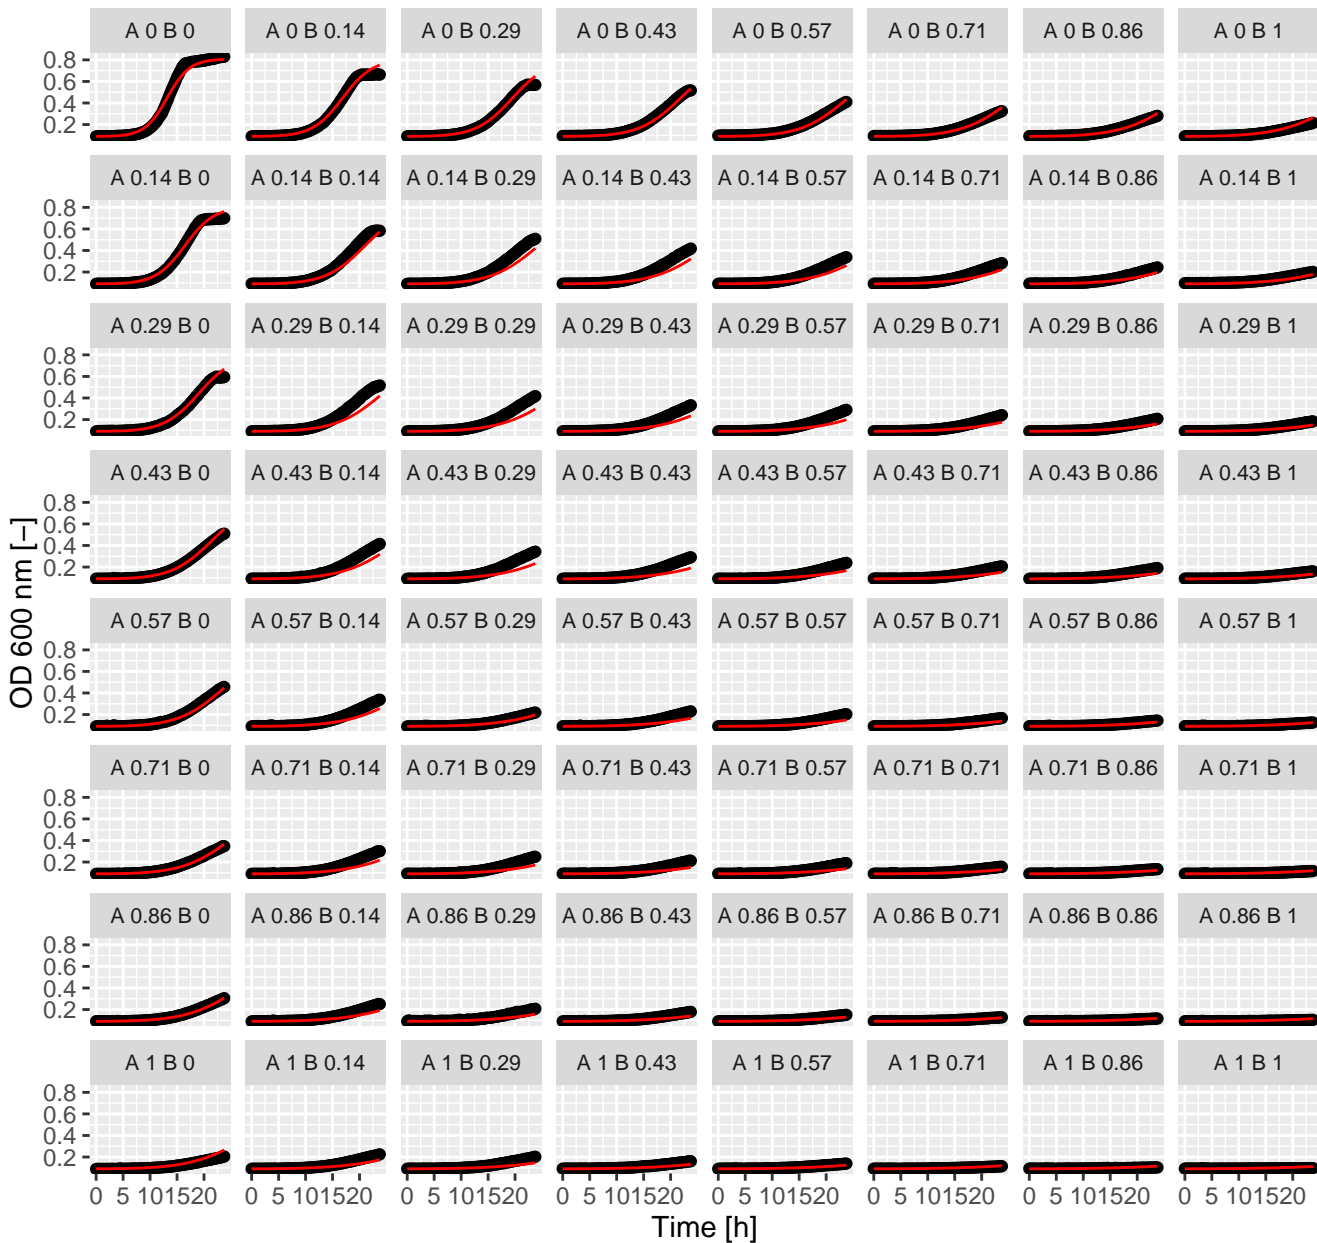

C3P.C3P (= Ax.Bx) full GPDI  
Int\_AB = 0.44 and Int\_BA = 0.42 at EC50

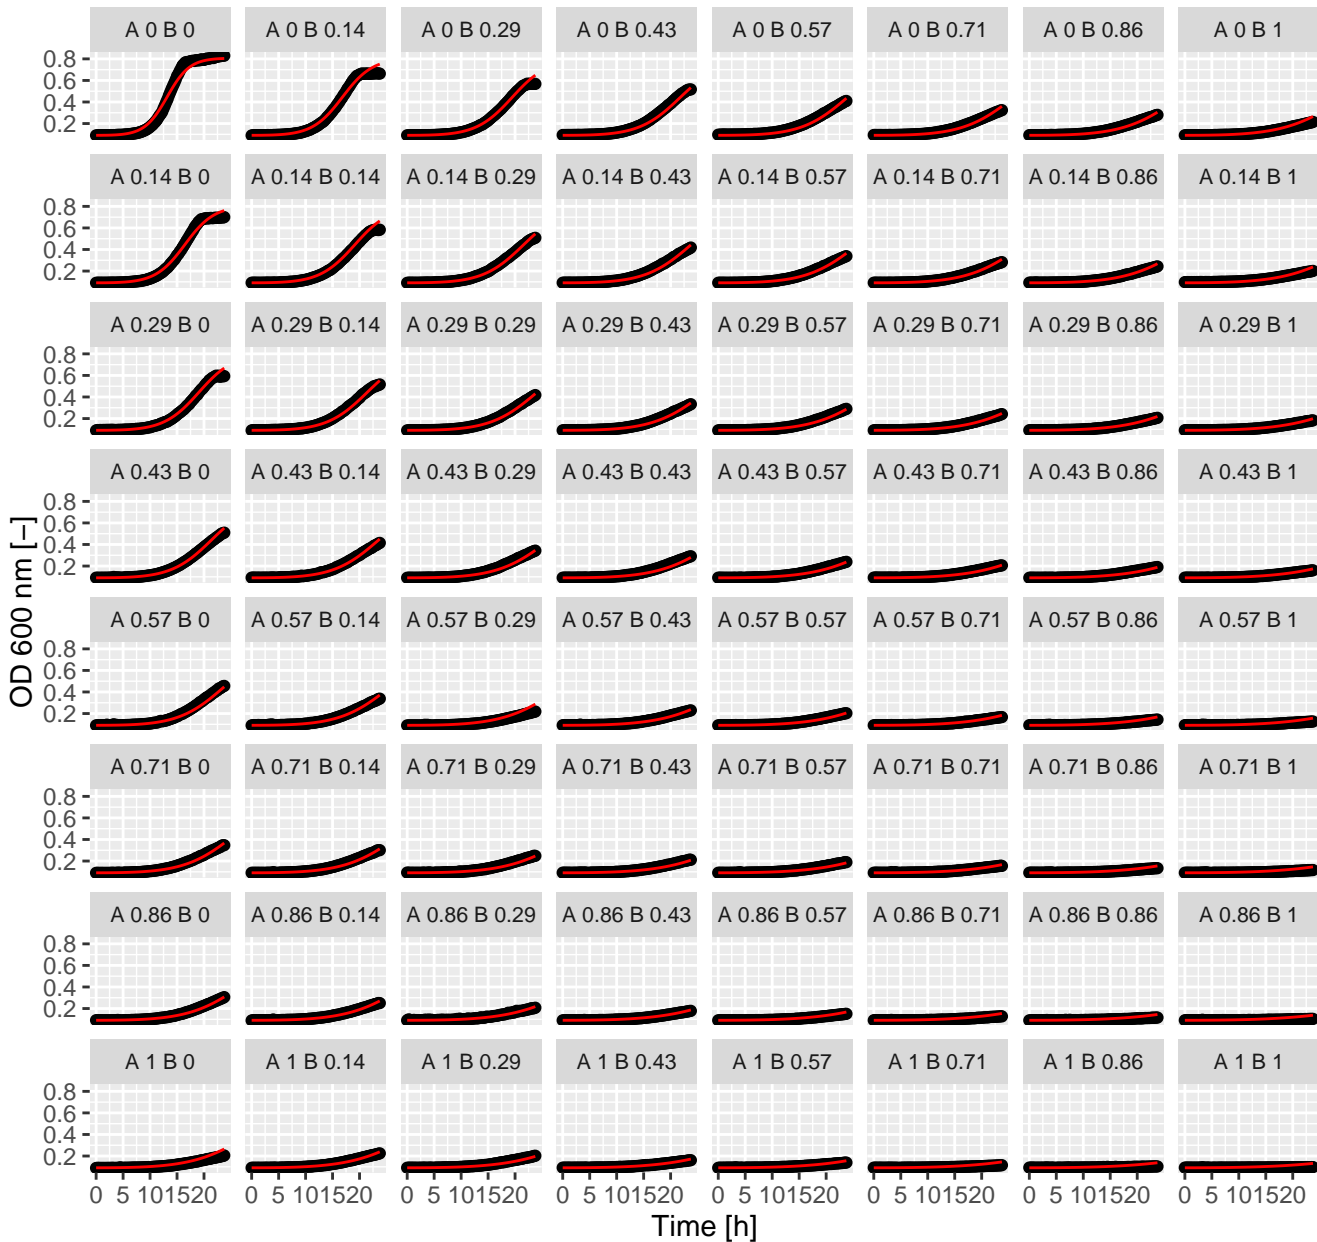

Bro.Tun (= Ax.Bx) exp. additivity (BI)  
Int\_AB = 0 and Int\_BA = 0 at EC50

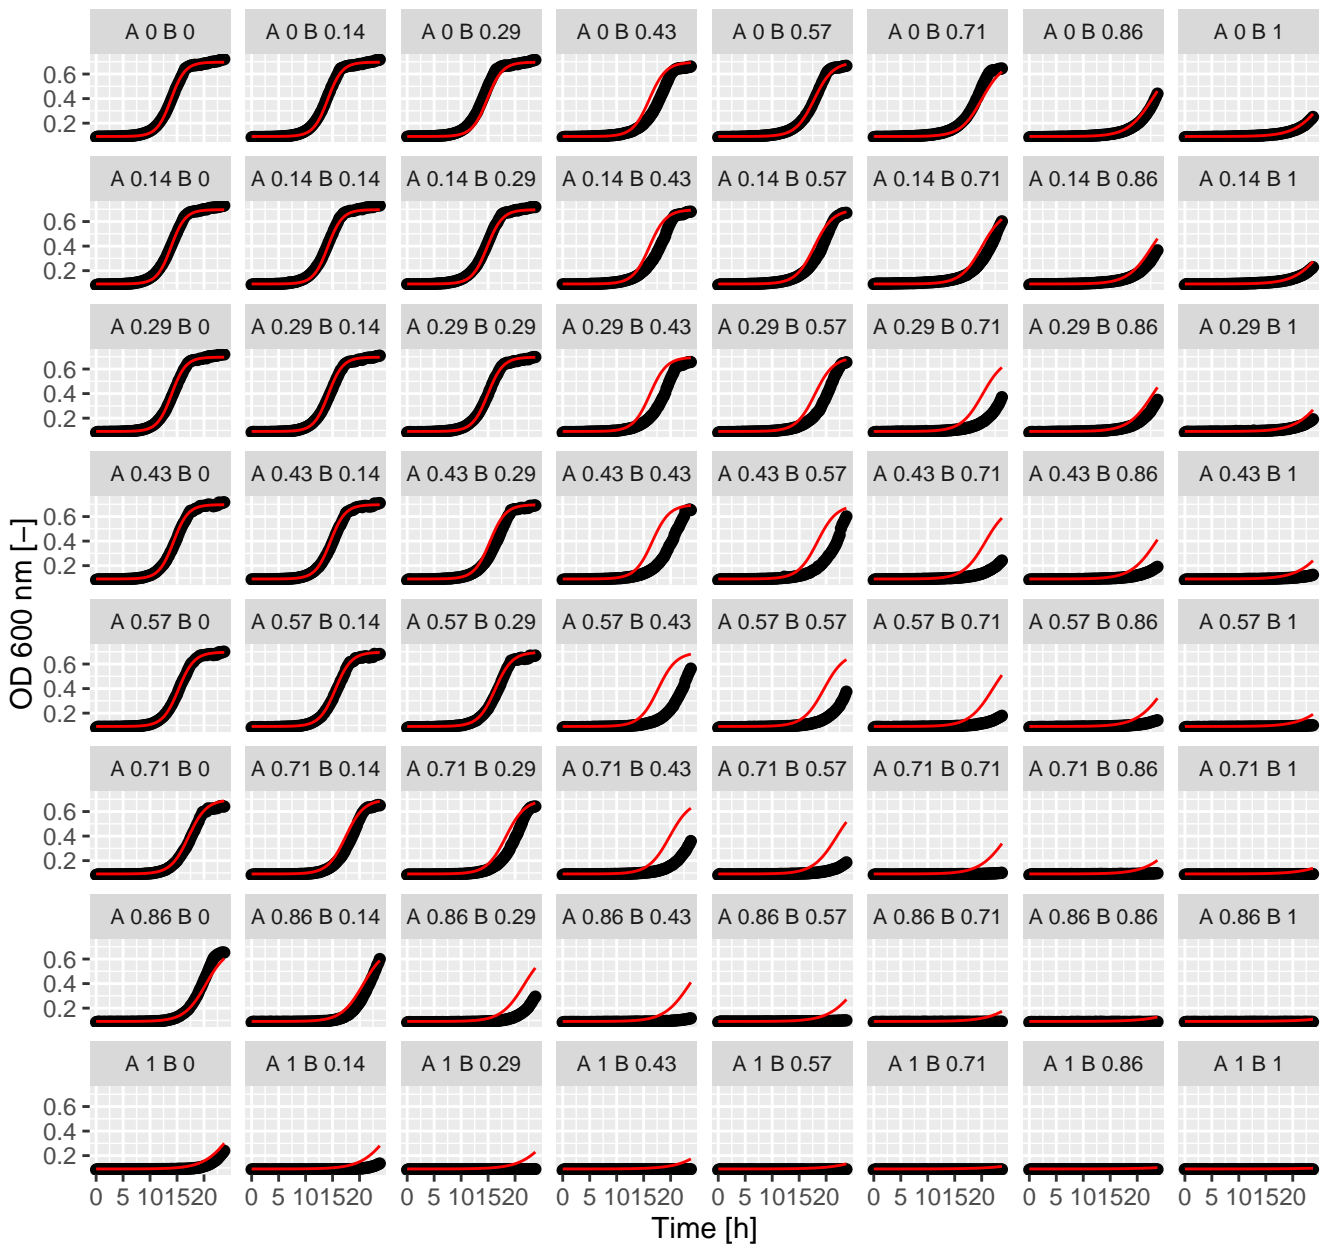

Bro.Tun (= Ax.Bx) full GPDI  
Int\_AB = -0.02 and Int\_BA = -0.47 at EC50

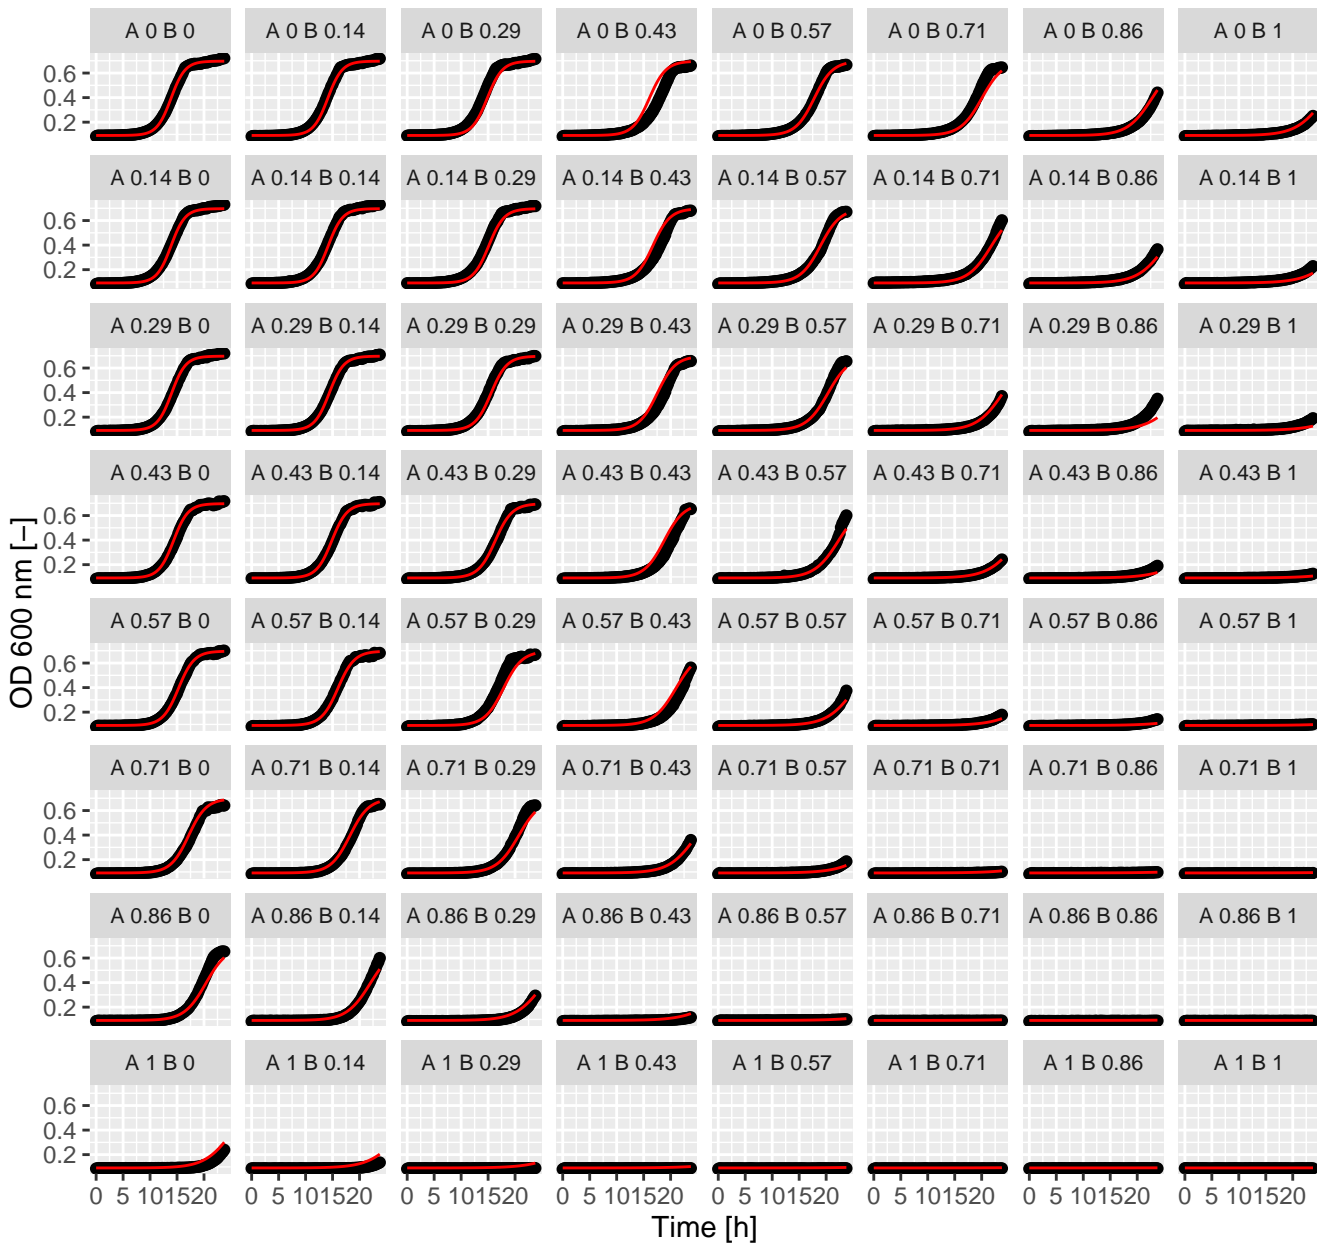

Bro.Ter (= Ax.Bx) exp. additivity (BI)  
Int\_AB = 0 and Int\_BA = 0 at EC50

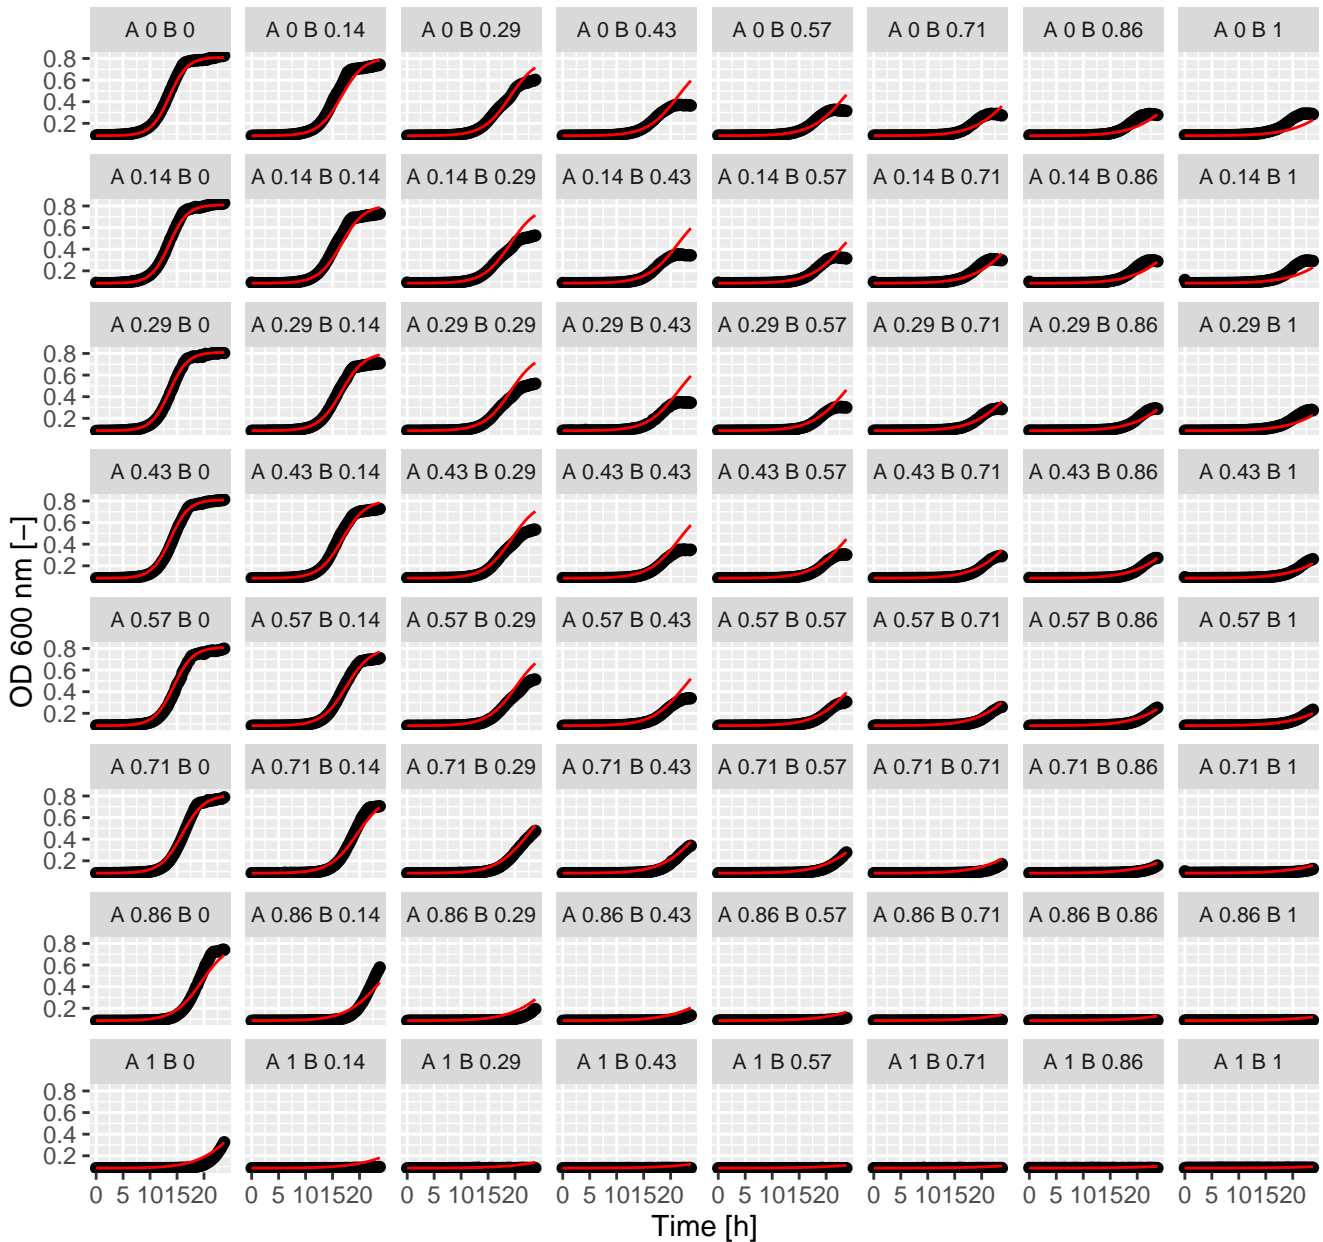

Bro.Ter (= Ax.Bx) full GPDI  
Int\_AB = 0.02 and Int\_BA = -0.2 at EC50

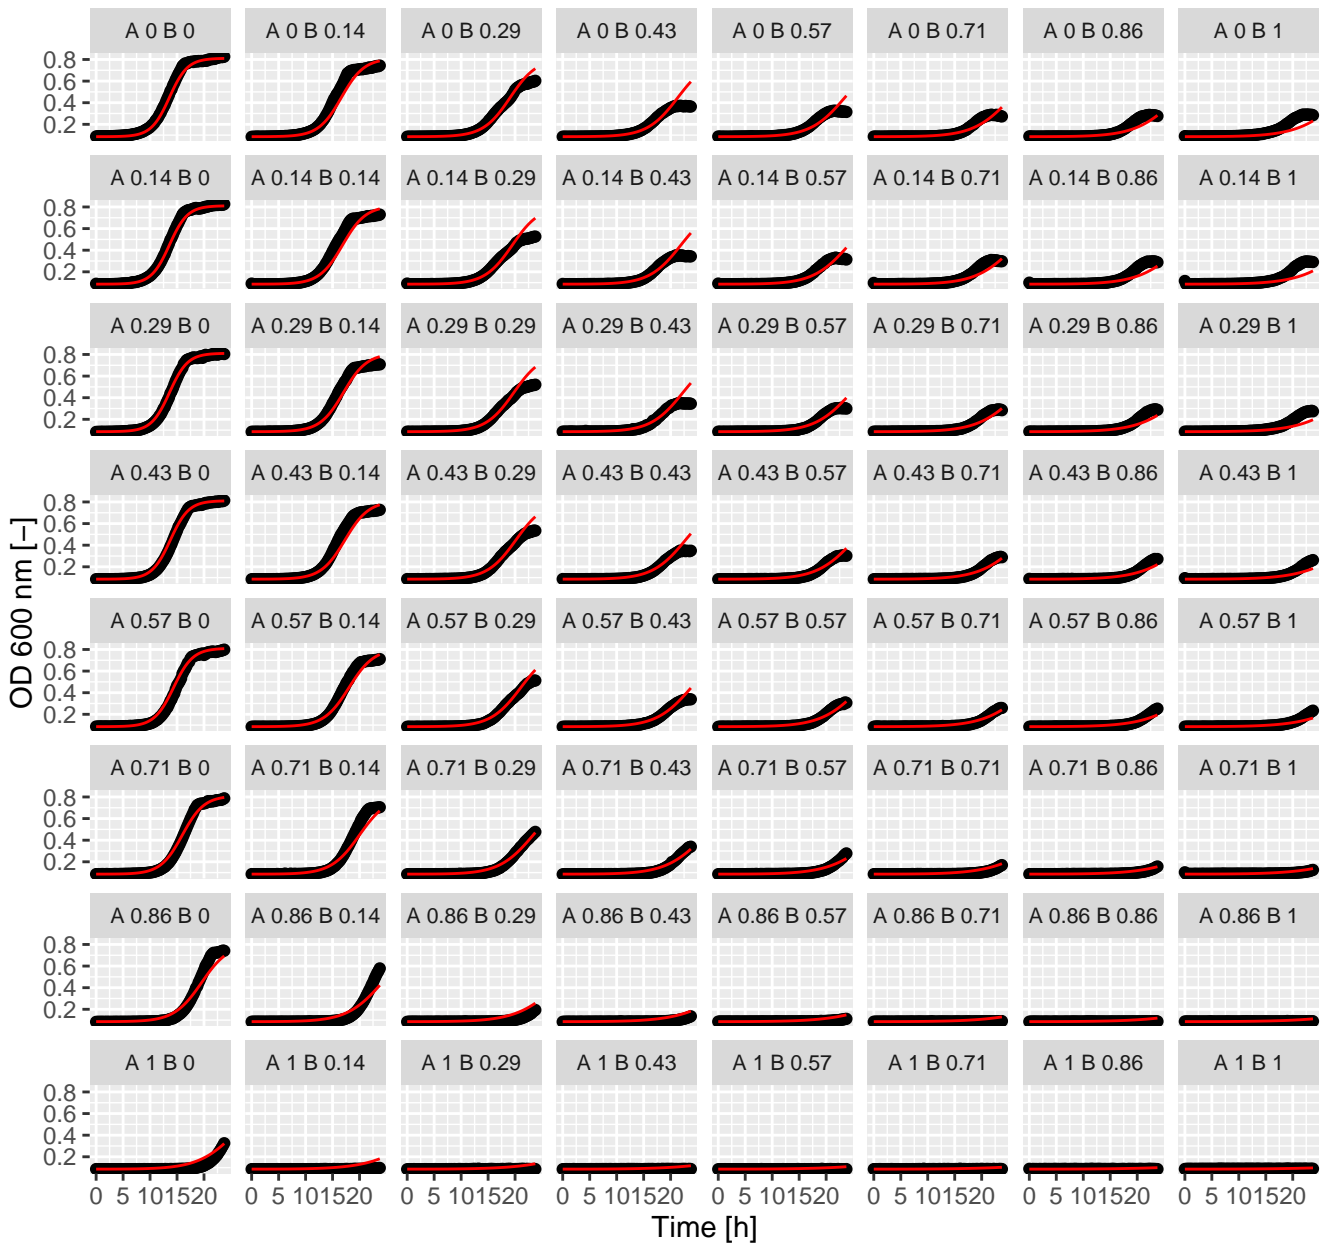

Bro.Tac (= Ax.Bx) exp. additivity (BI)  
Int\_AB = 0 and Int\_BA = 0 at EC50

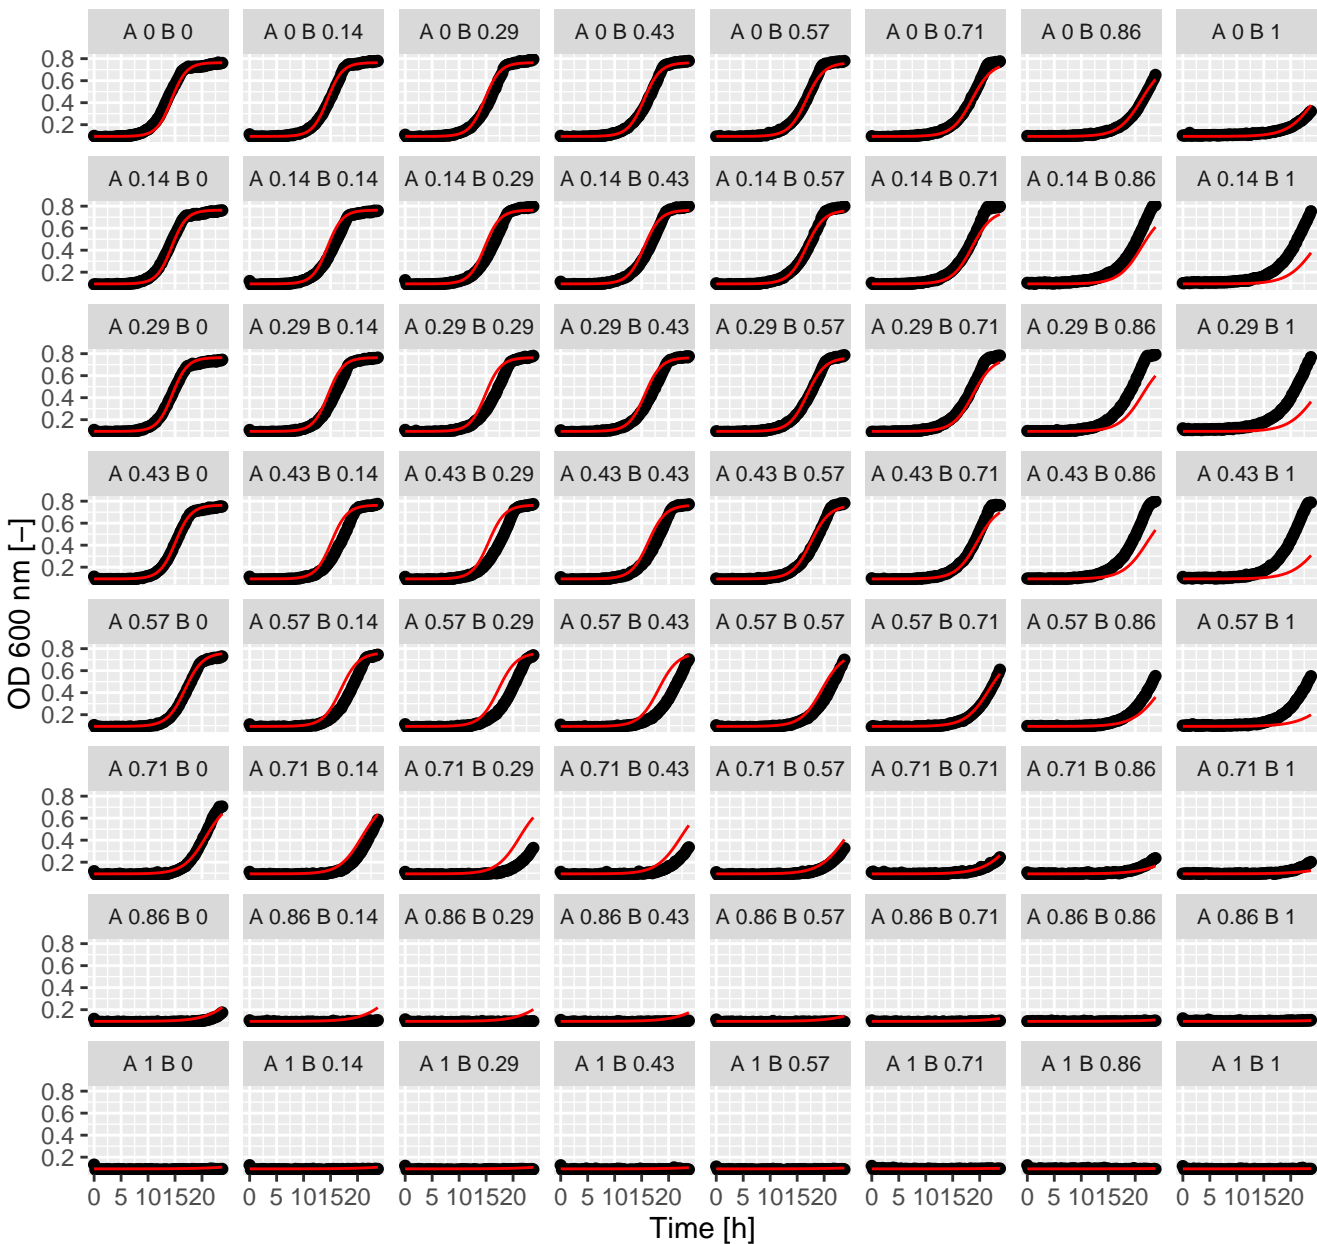

Bro.Tac (= Ax.Bx) full GPDI  
Int\_AB = -0.15 and Int\_BA = 0.36 at EC50

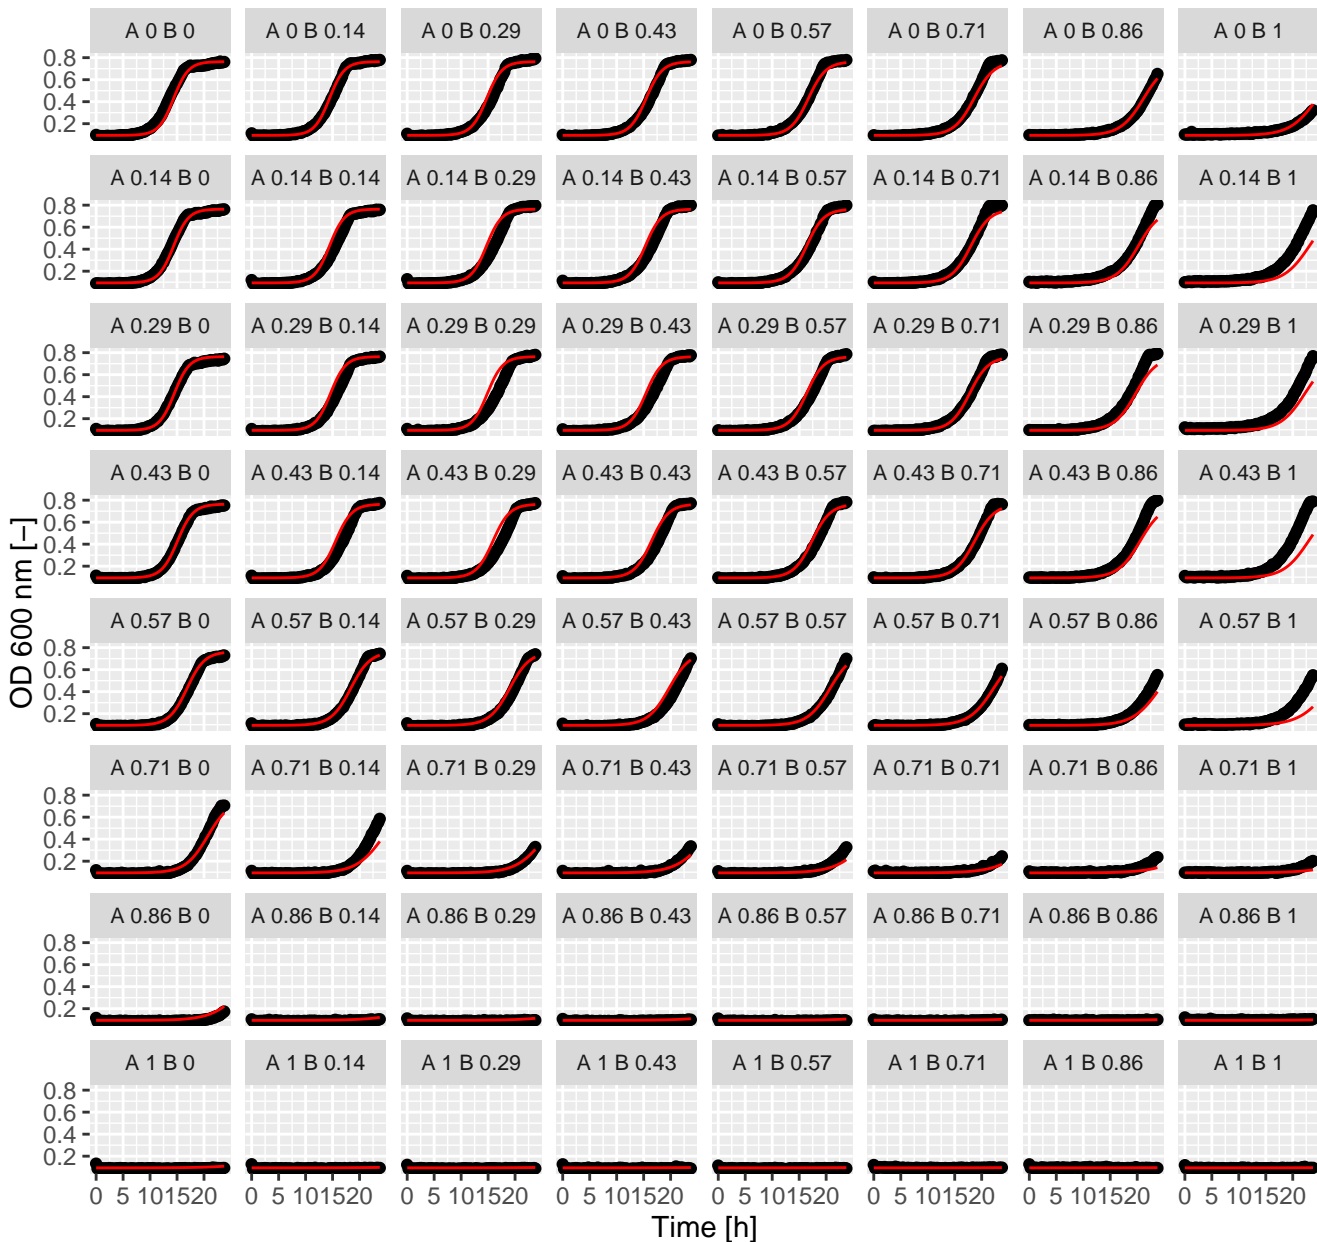



Bro.Sta (= Ax.Bx) exp. additivity (BI)  
Int\_AB = 0 and Int\_BA = 0 at EC50

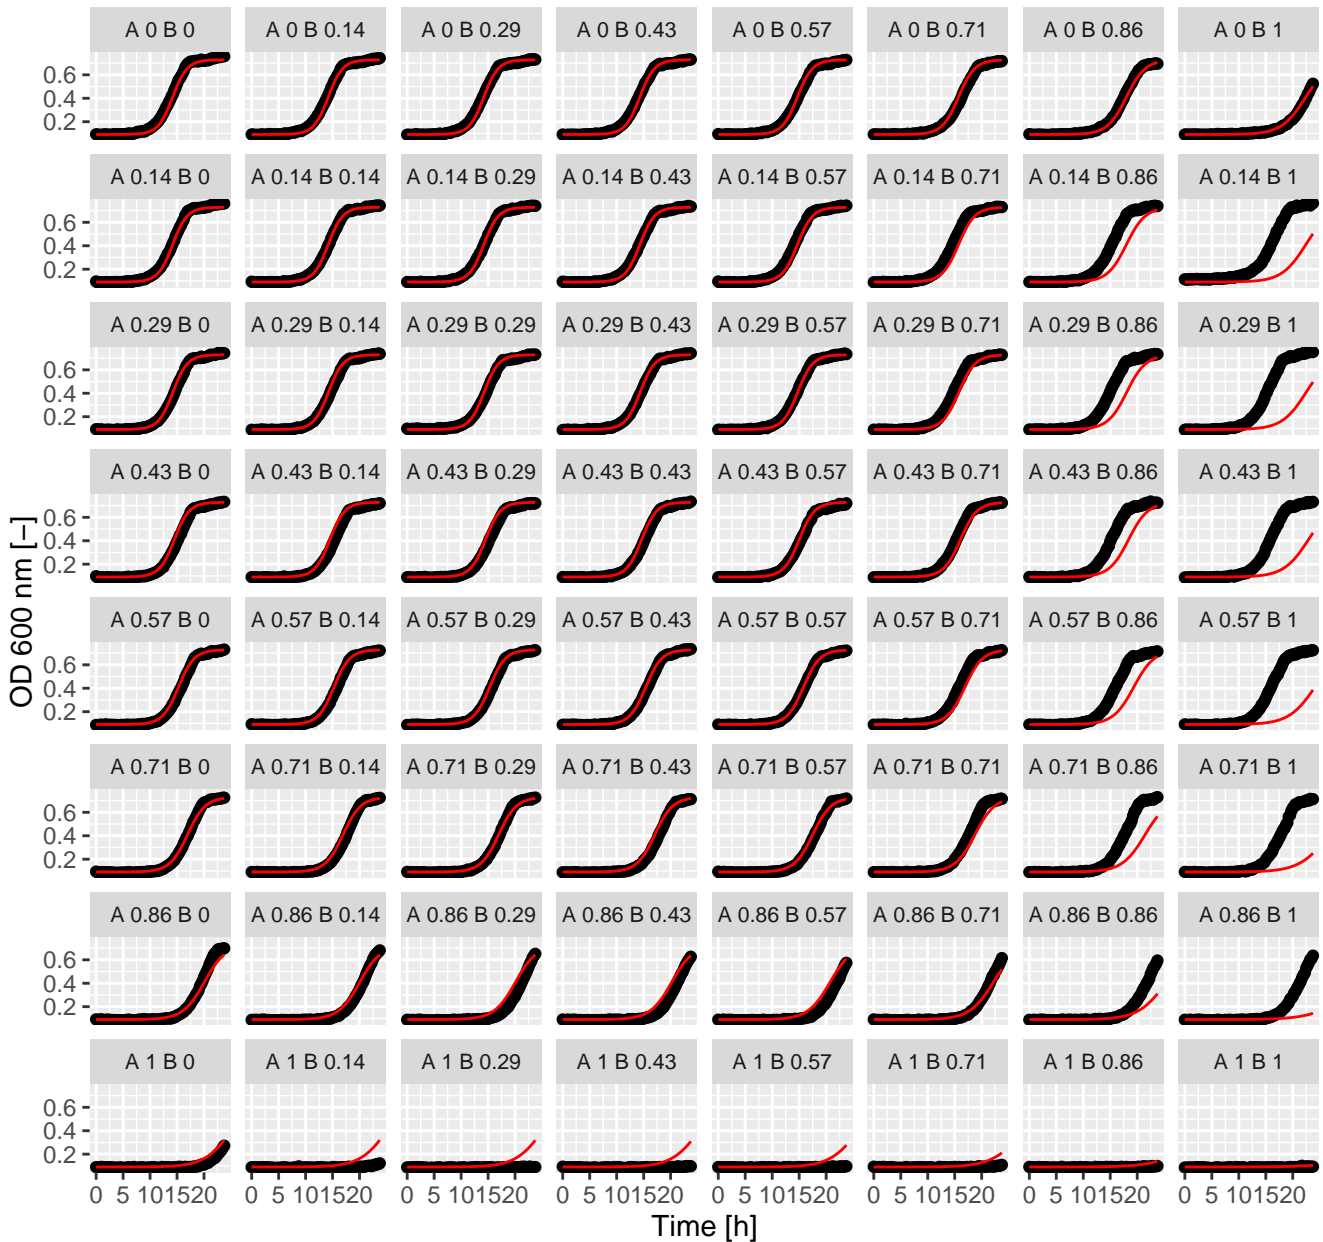

Bro.Sta (= Ax.Bx) full GPDI  
Int\_AB = -0.06 and Int\_BA = 1.08 at EC50

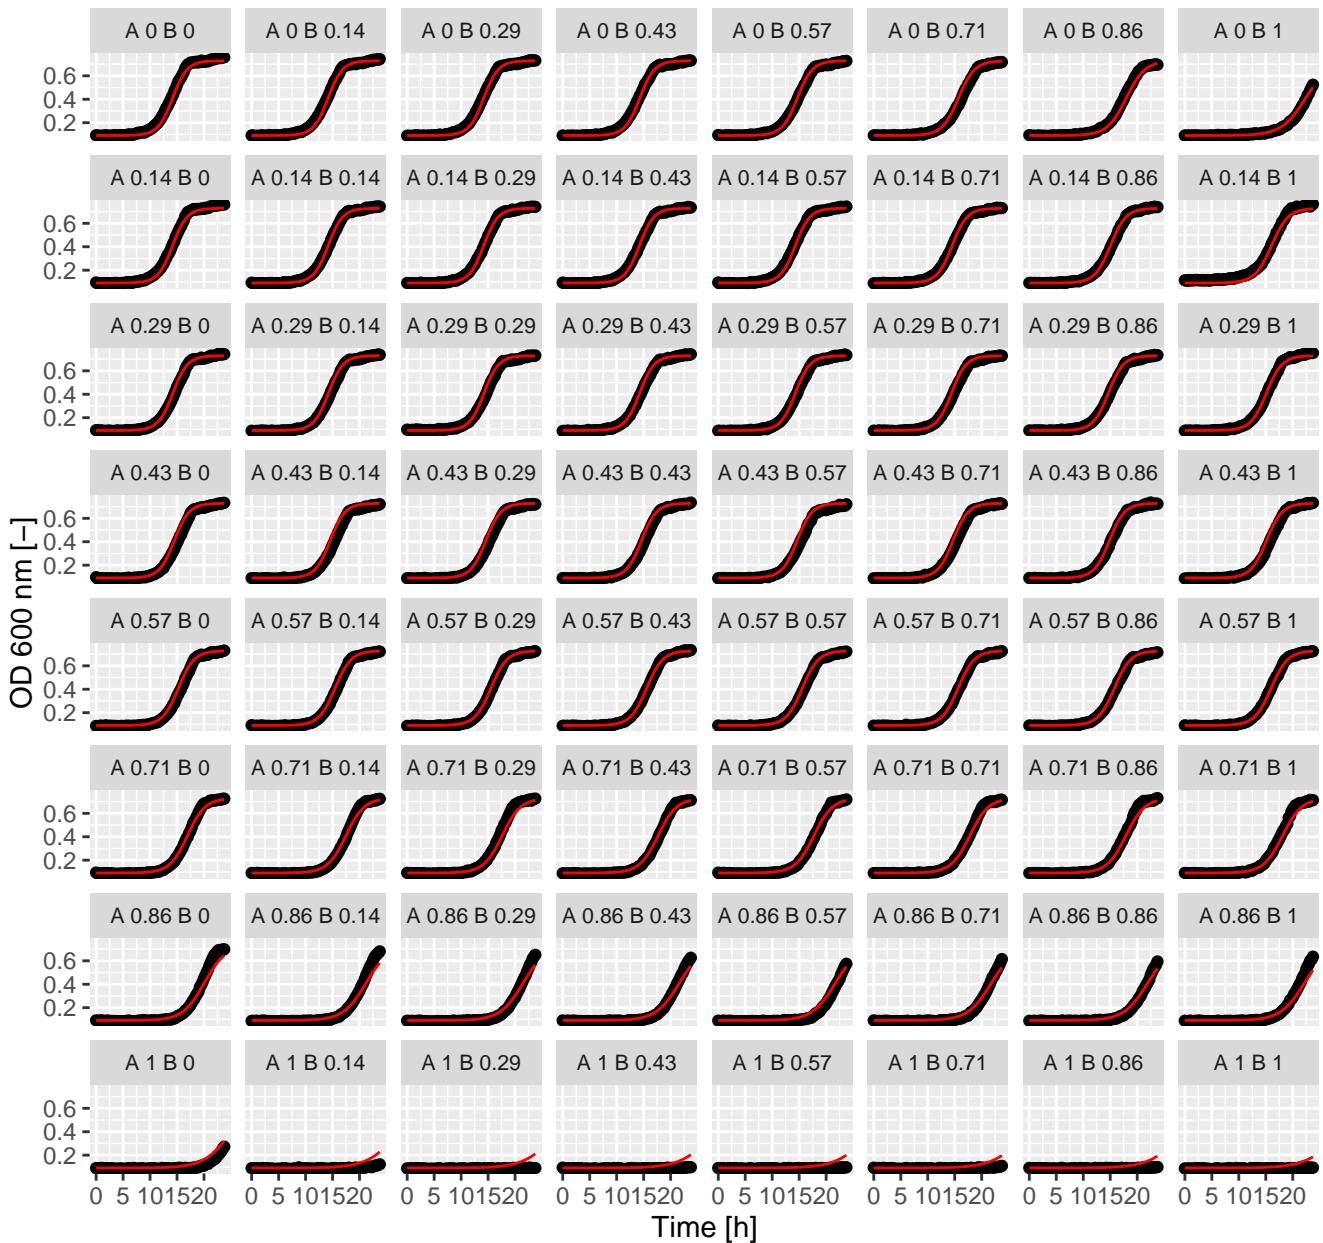

Bro.Rap (= Ax.Bx) exp. additivity (BI)  
Int\_AB = 0 and Int\_BA = 0 at EC50

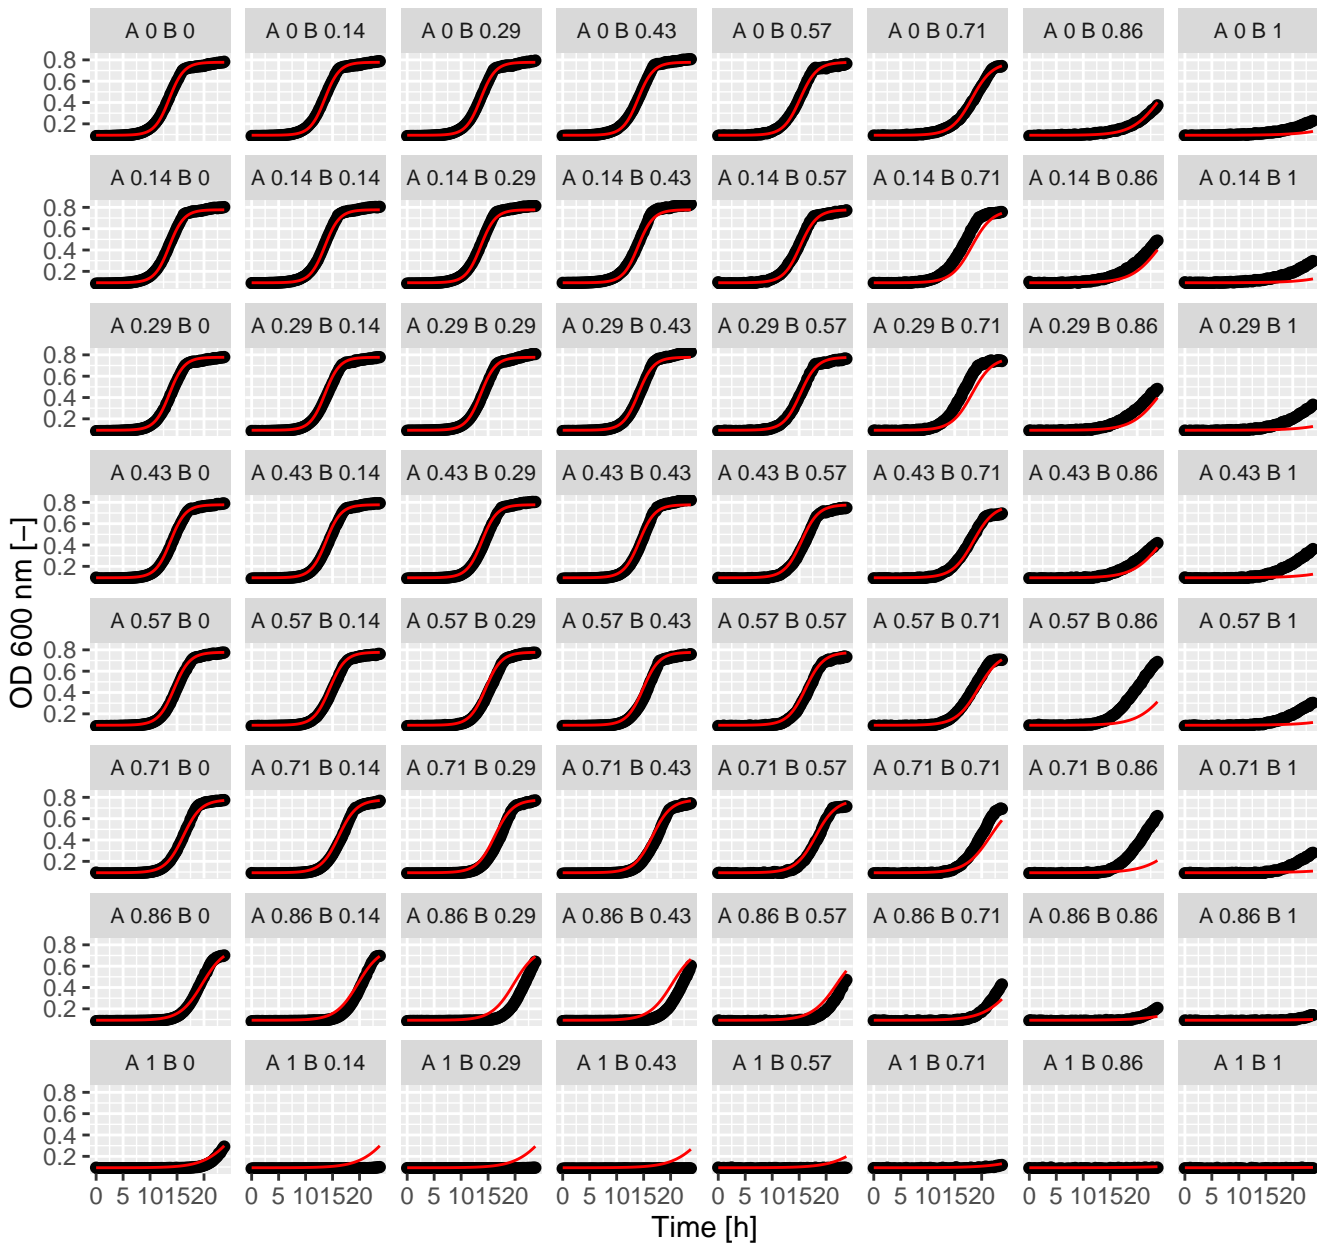

Bro.Rap (= Ax.Bx) full GPDI  
Int\_AB = -0.09 and Int\_BA = 0.18 at EC50

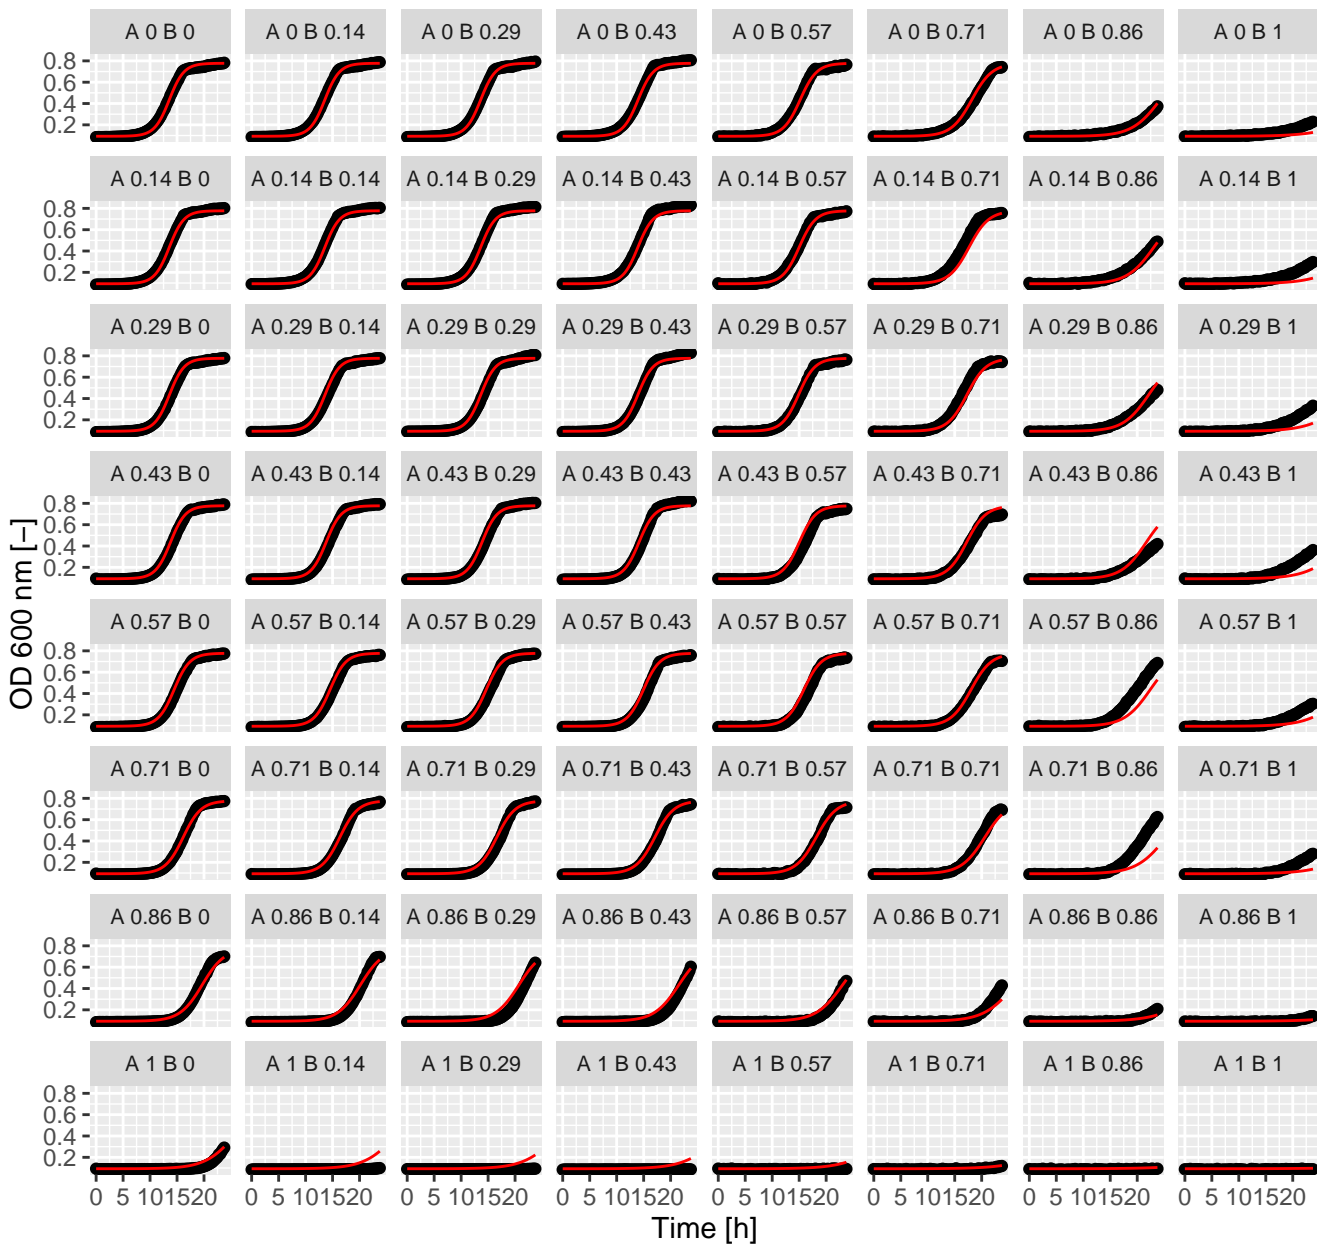

Bro.Pen (= Ax.Bx) exp. additivity (BI)  
Int\_AB = 0 and Int\_BA = 0 at EC50

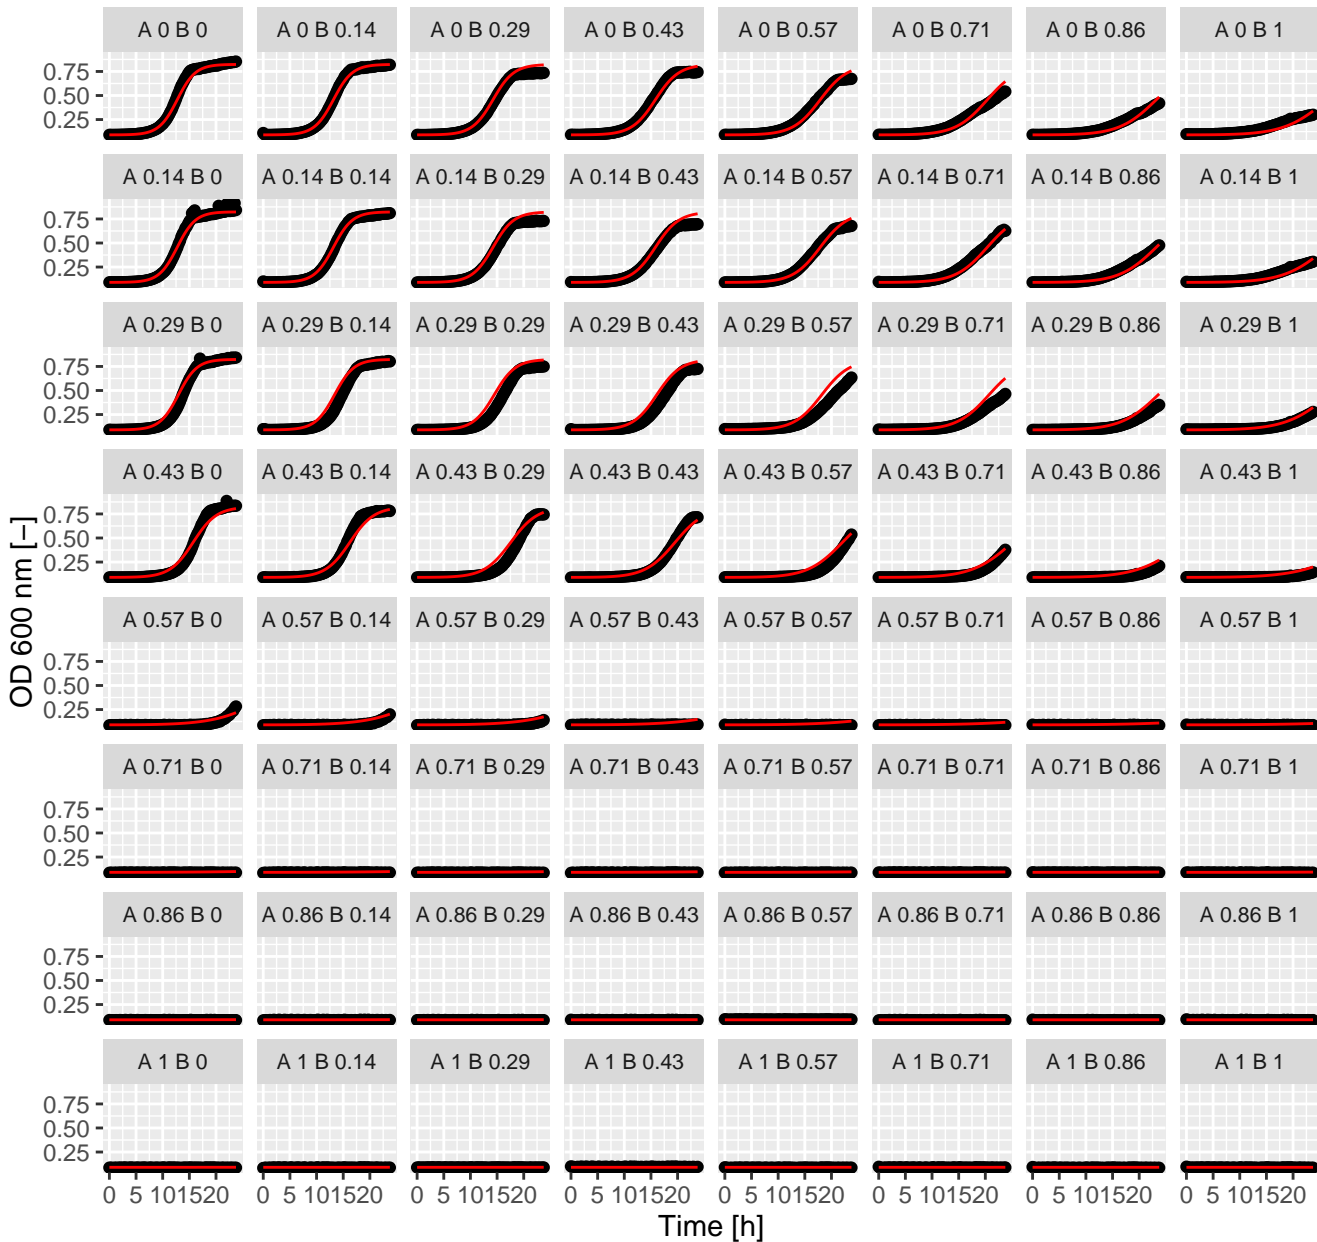

Bro.Pen (= Ax.Bx) full GPDI  
Int\_AB = 0.04 and Int\_BA = -0.22 at EC50

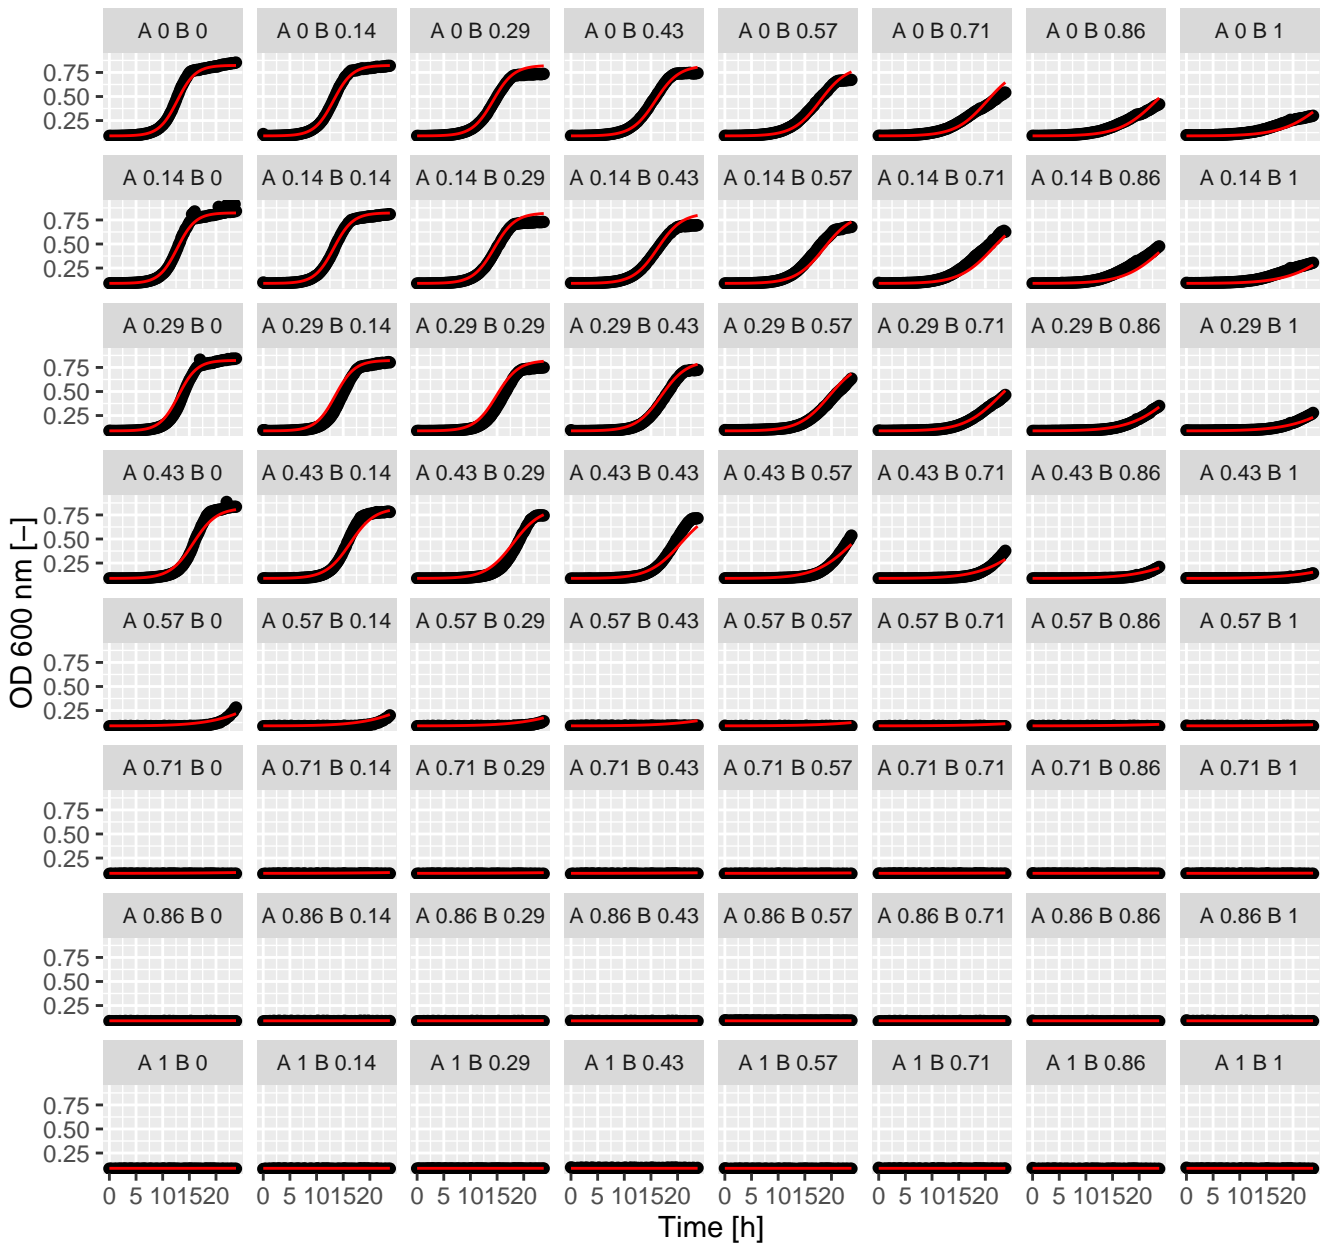

Bro.Lat (= Ax.Bx) exp. additivity (BI)  
Int\_AB = 0 and Int\_BA = 0 at EC50

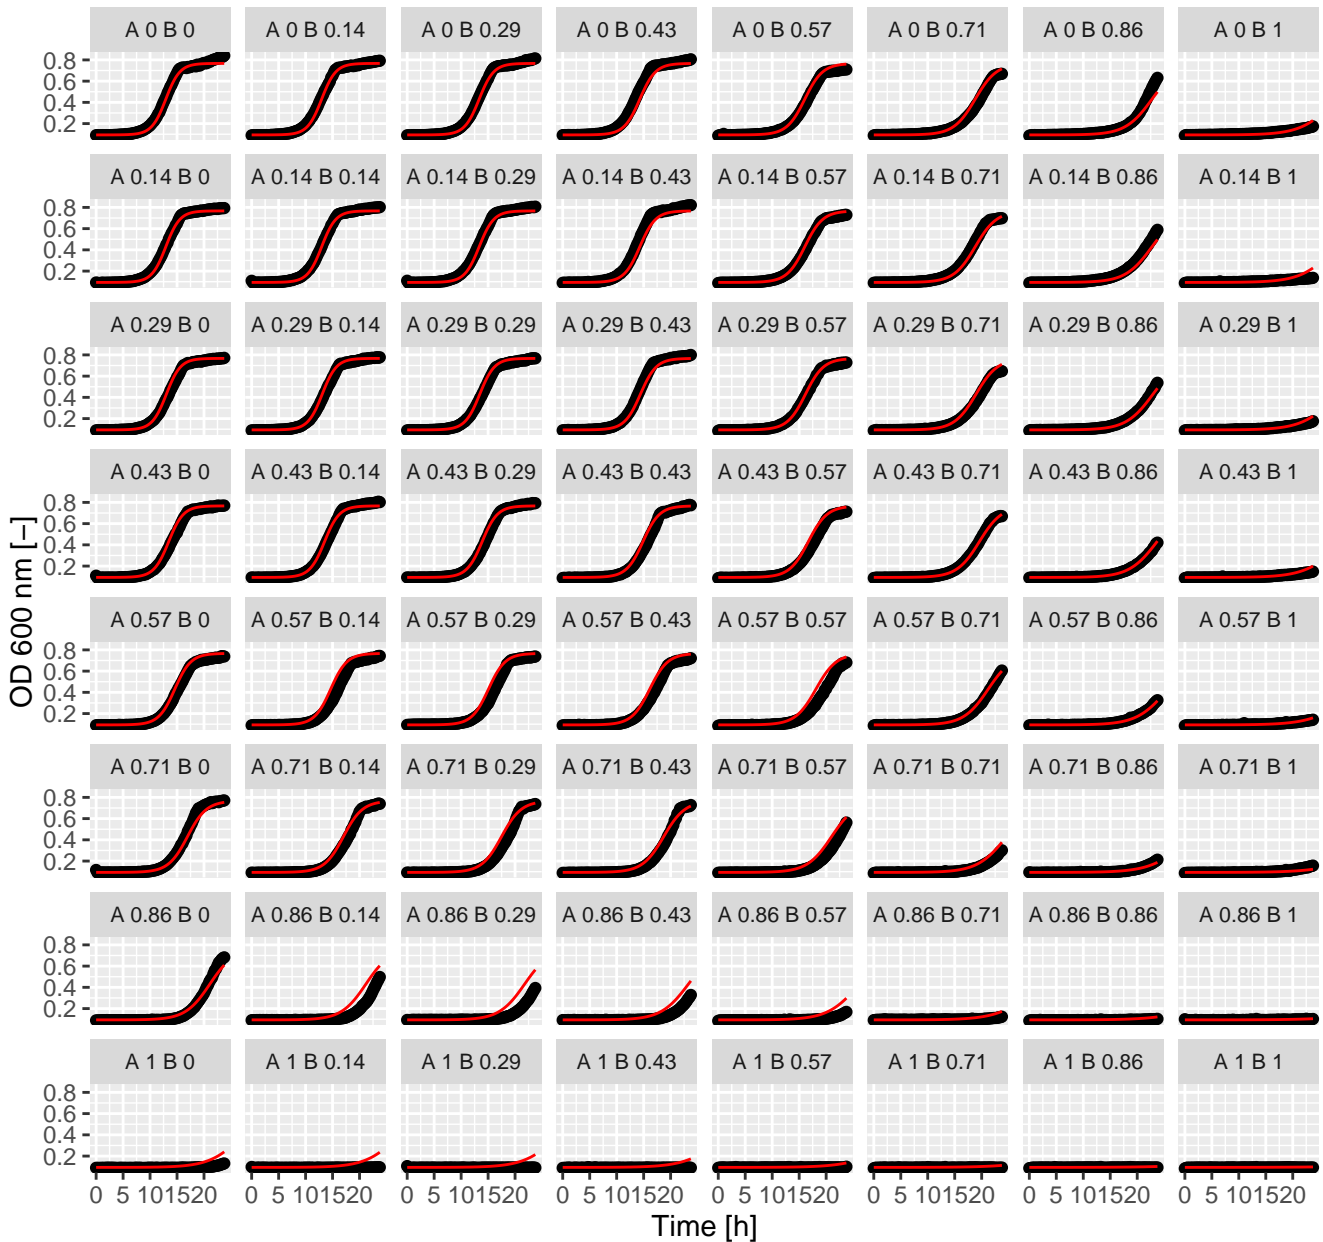

Bro.Lat (= Ax.Bx) full GPDI  
Int\_AB = -0.07 and Int\_BA = 0.01 at EC50

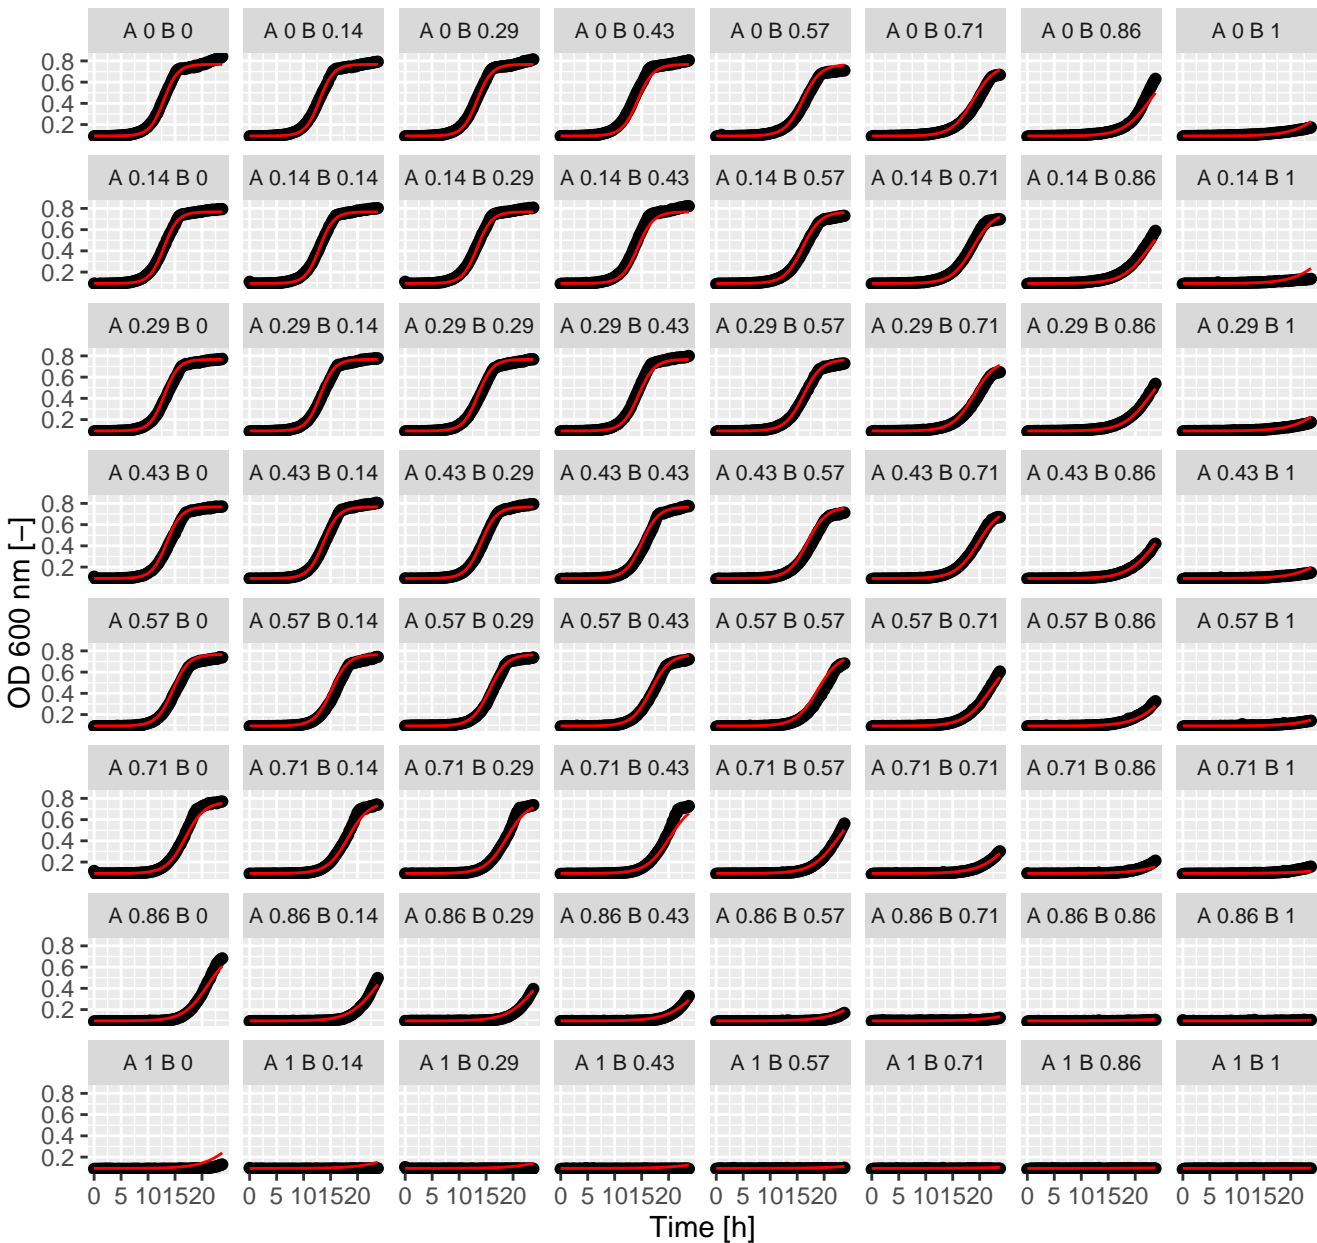



Bro.Hal (= Ax.Bx) exp. additivity (BI)  
Int\_AB = 0 and Int\_BA = 0 at EC50

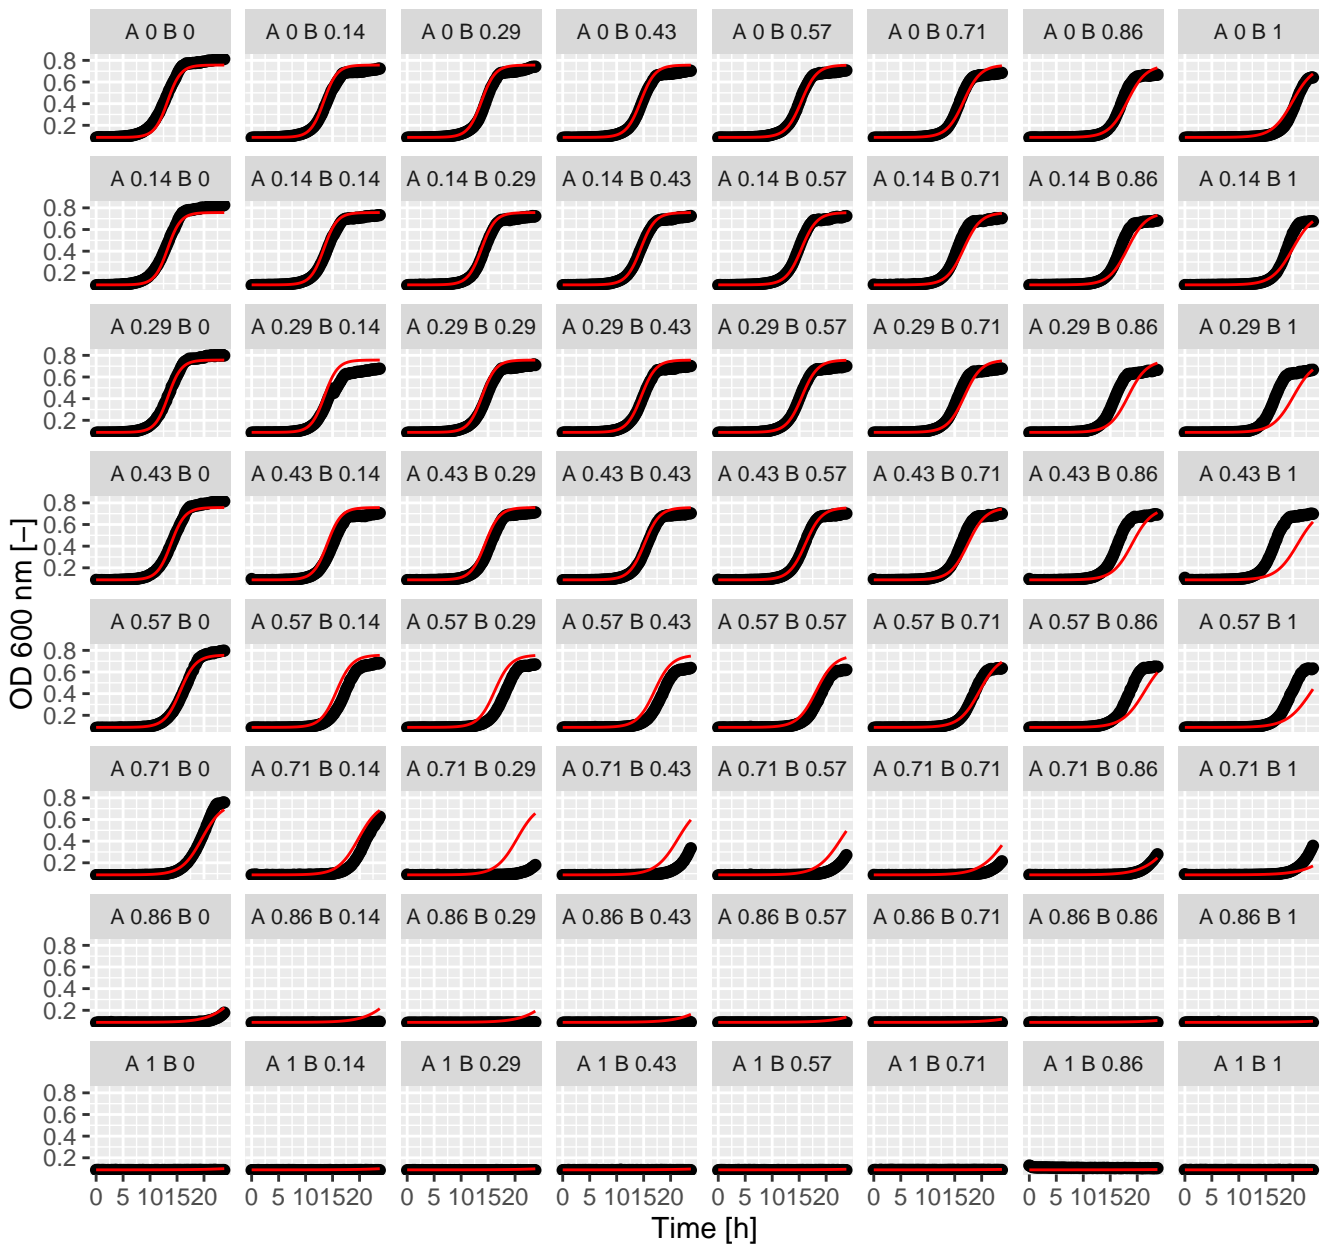

Bro.Hal (= Ax.Bx) full GPDI  
Int\_AB = -0.14 and Int\_BA = 0.97 at EC50

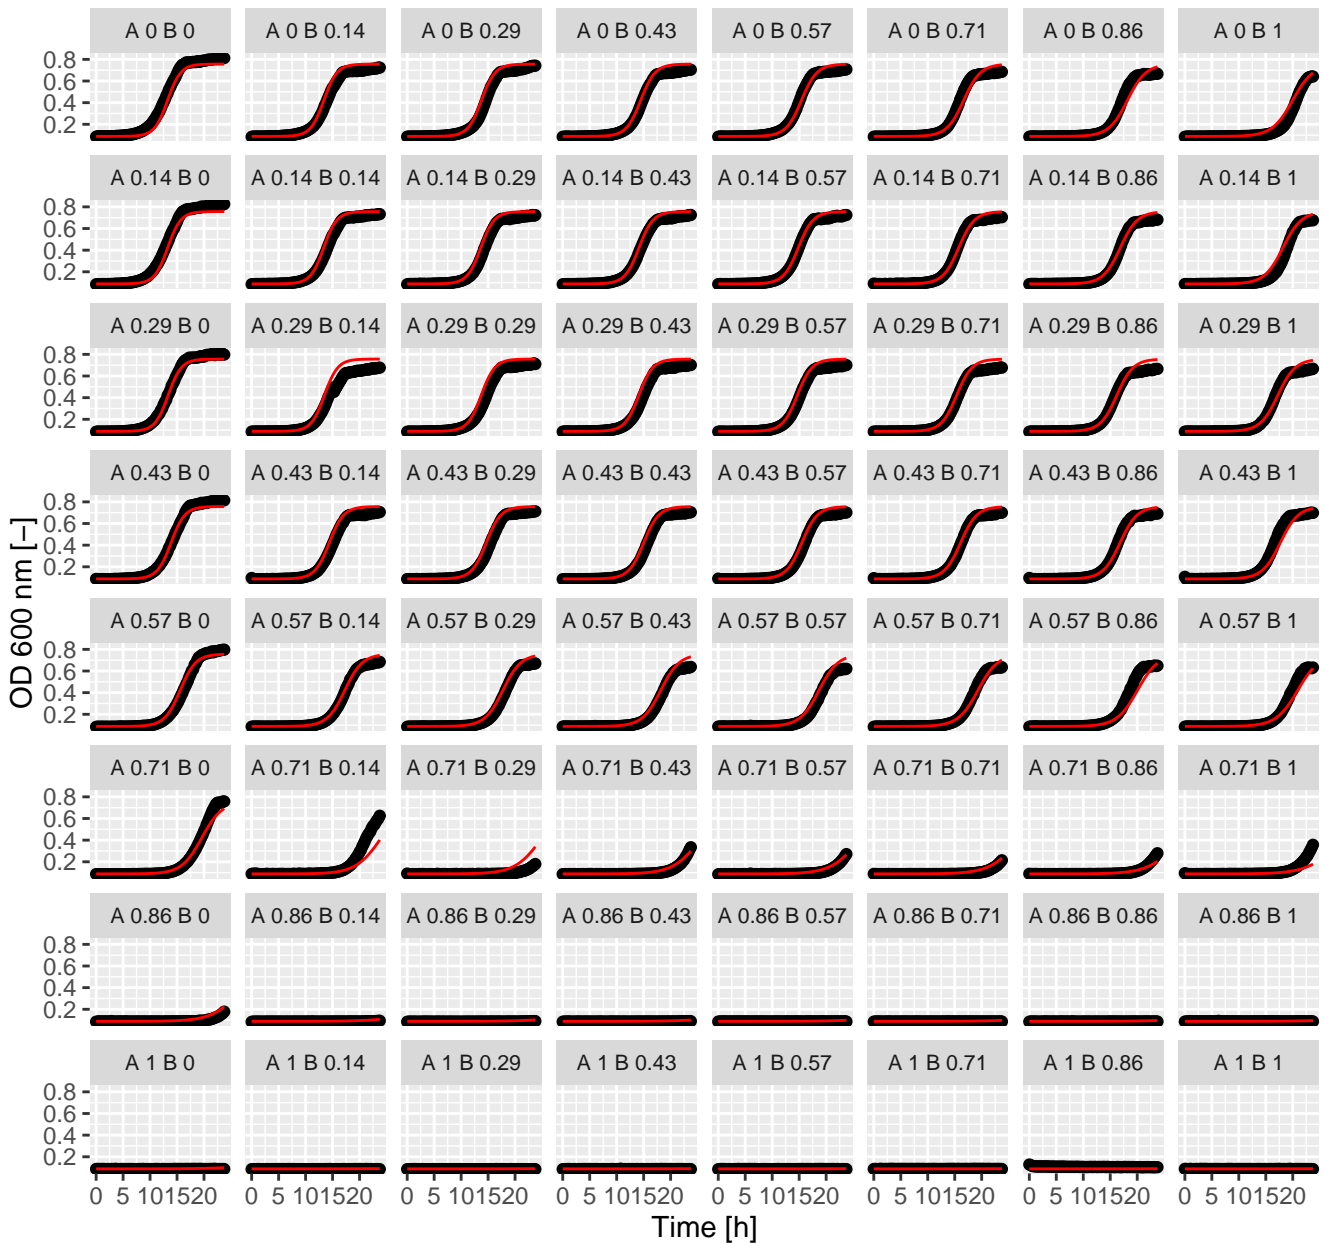

Bro.Fen (= Ax.Bx) exp. additivity (BI)  
Int\_AB = 0 and Int\_BA = 0 at EC50

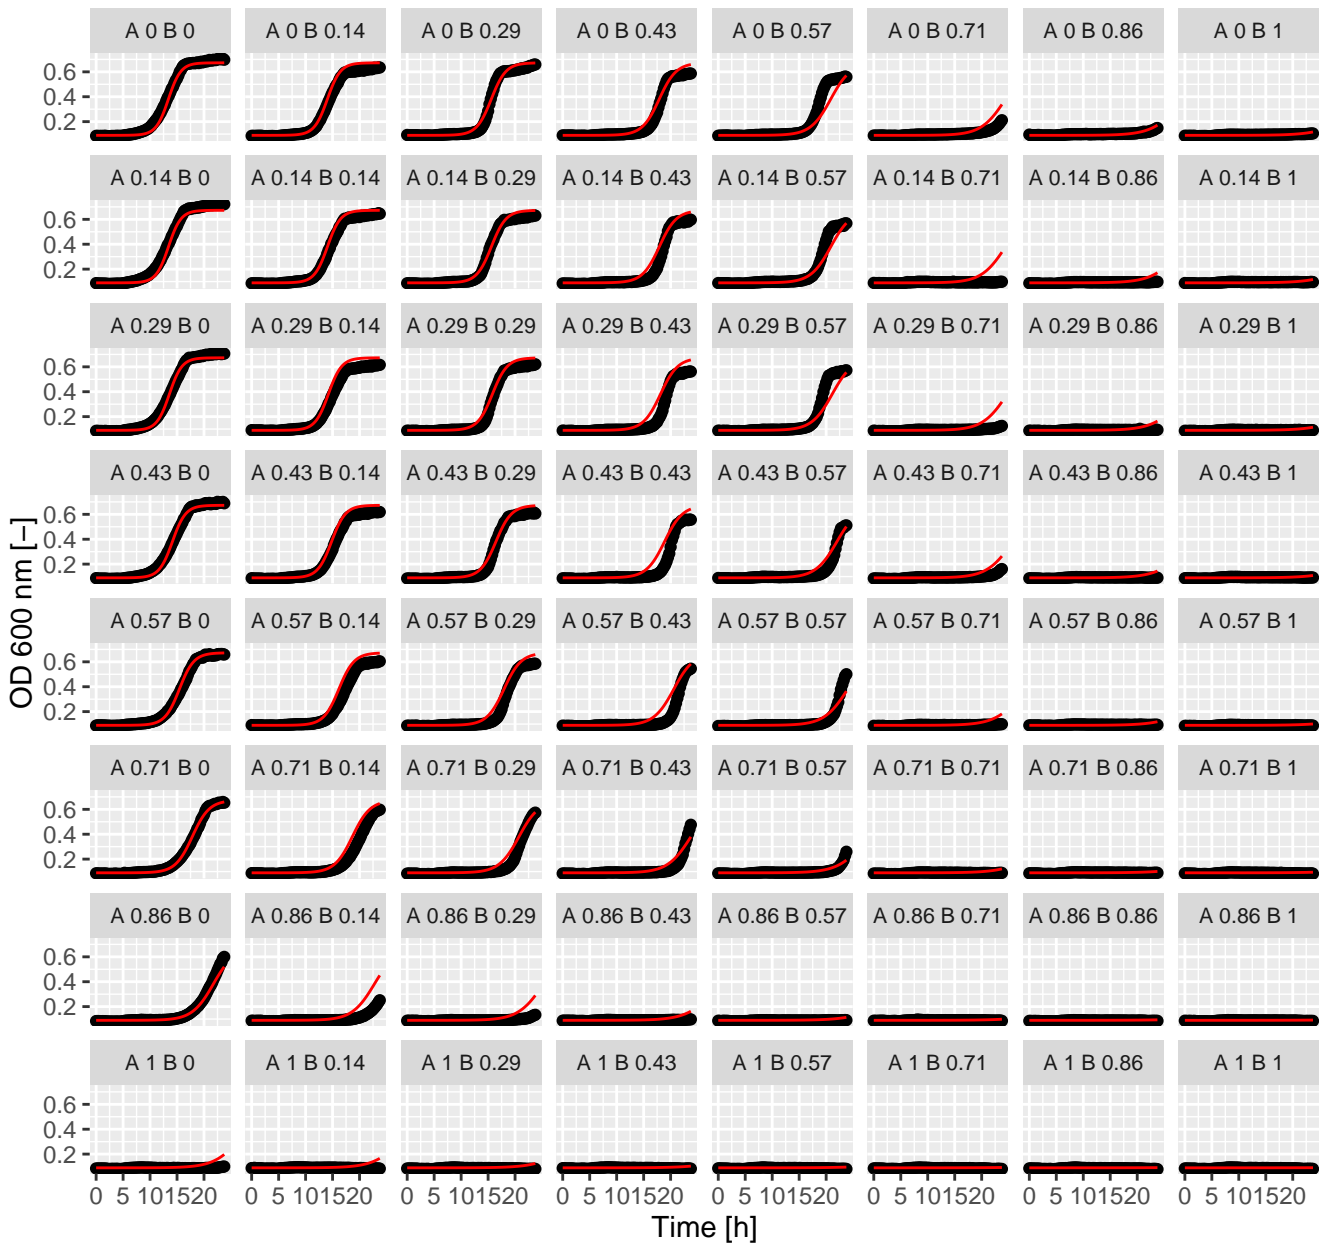

Bro.Fen (= Ax.Bx) full GPDI  
Int\_AB = -0.07 and Int\_BA = -0.04 at EC50

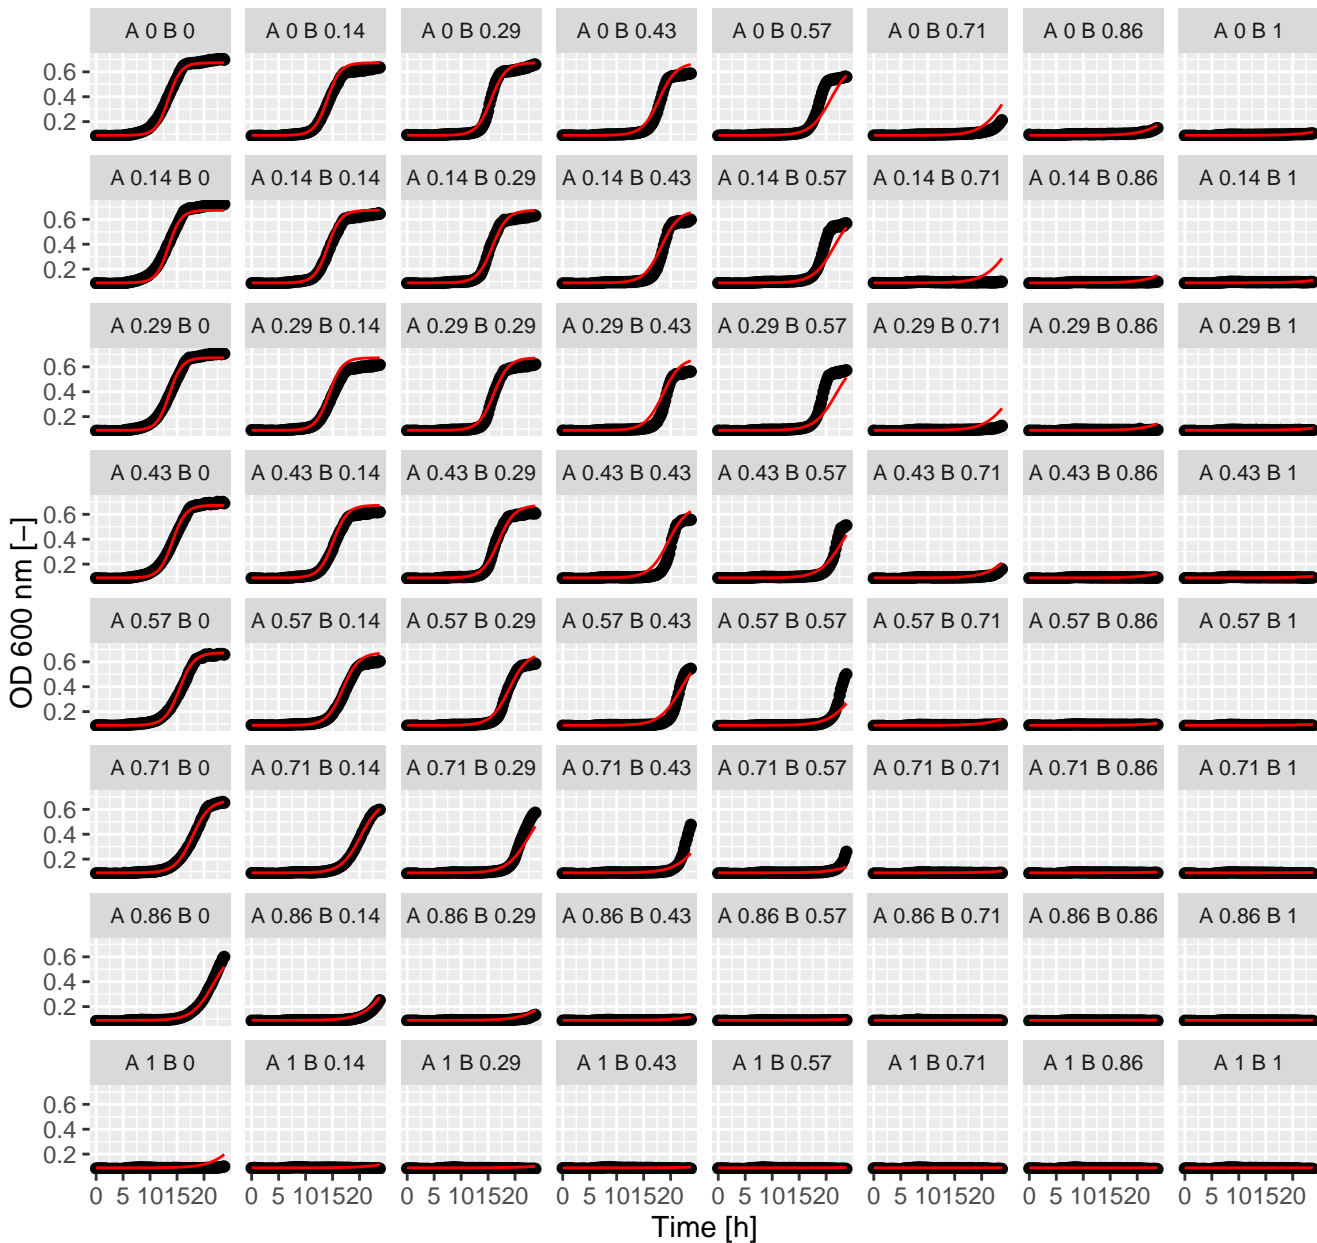

Bro.Dyc (= Ax.Bx) exp. additivity (BI)  
Int\_AB = 0 and Int\_BA = 0 at EC50

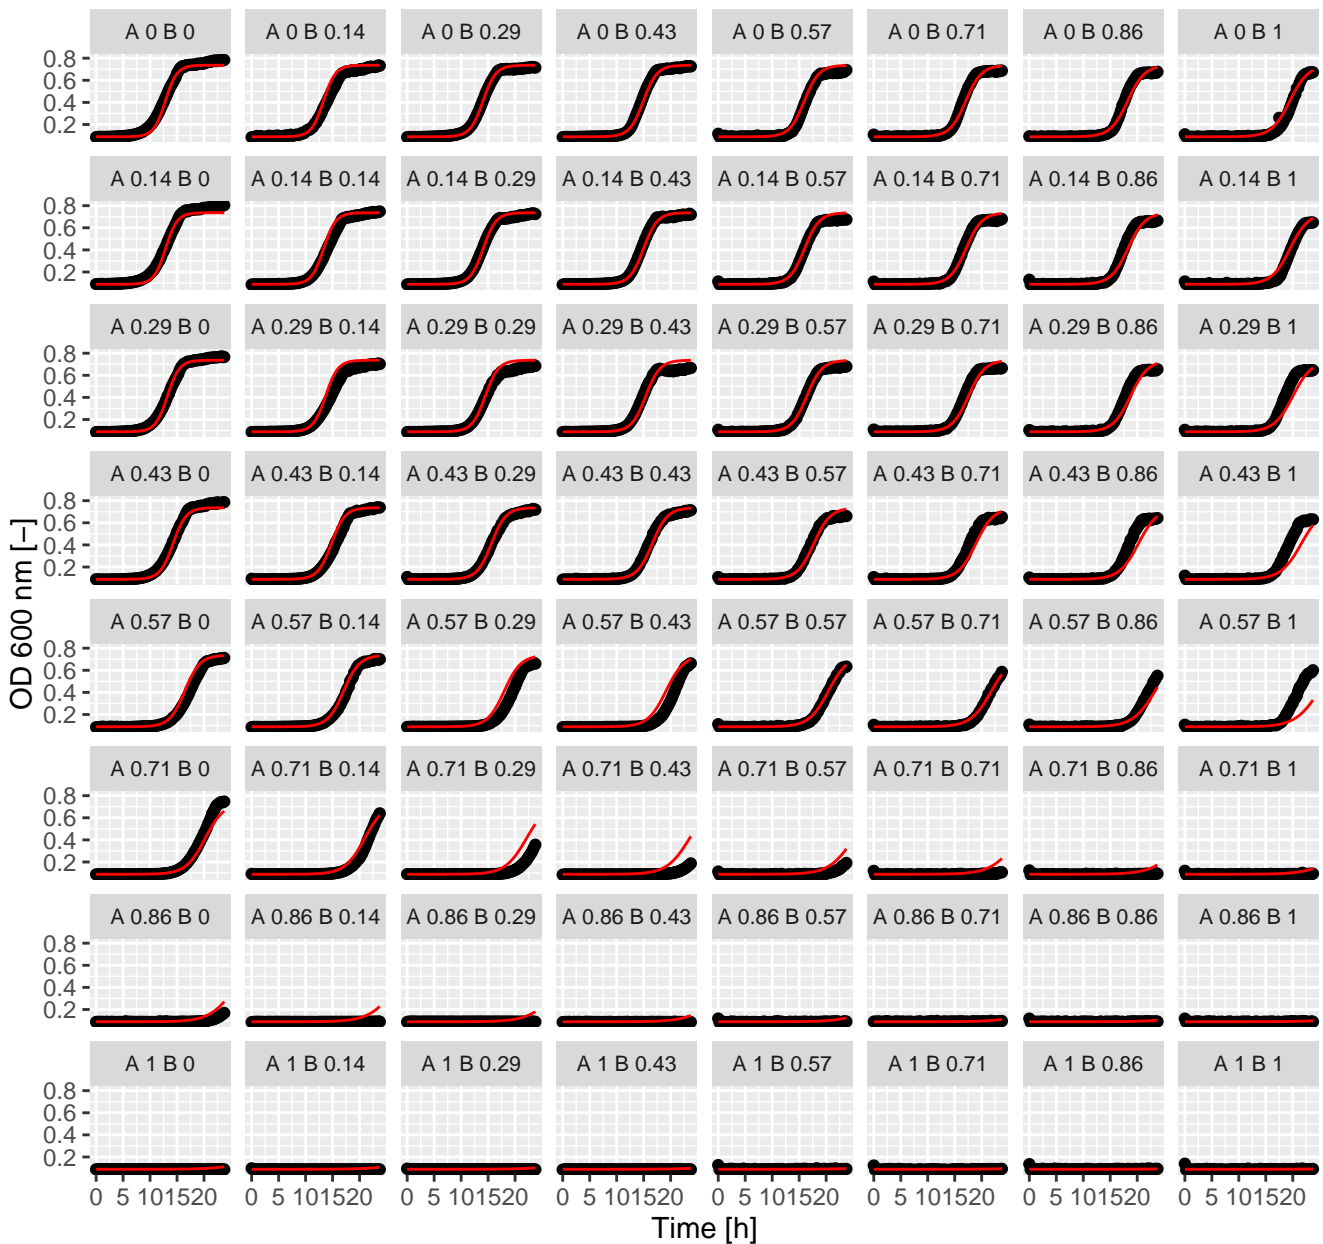

Bro.Dyc (= Ax.Bx) full GPDI  
Int\_AB = -0.12 and Int\_BA = 0.63 at EC50

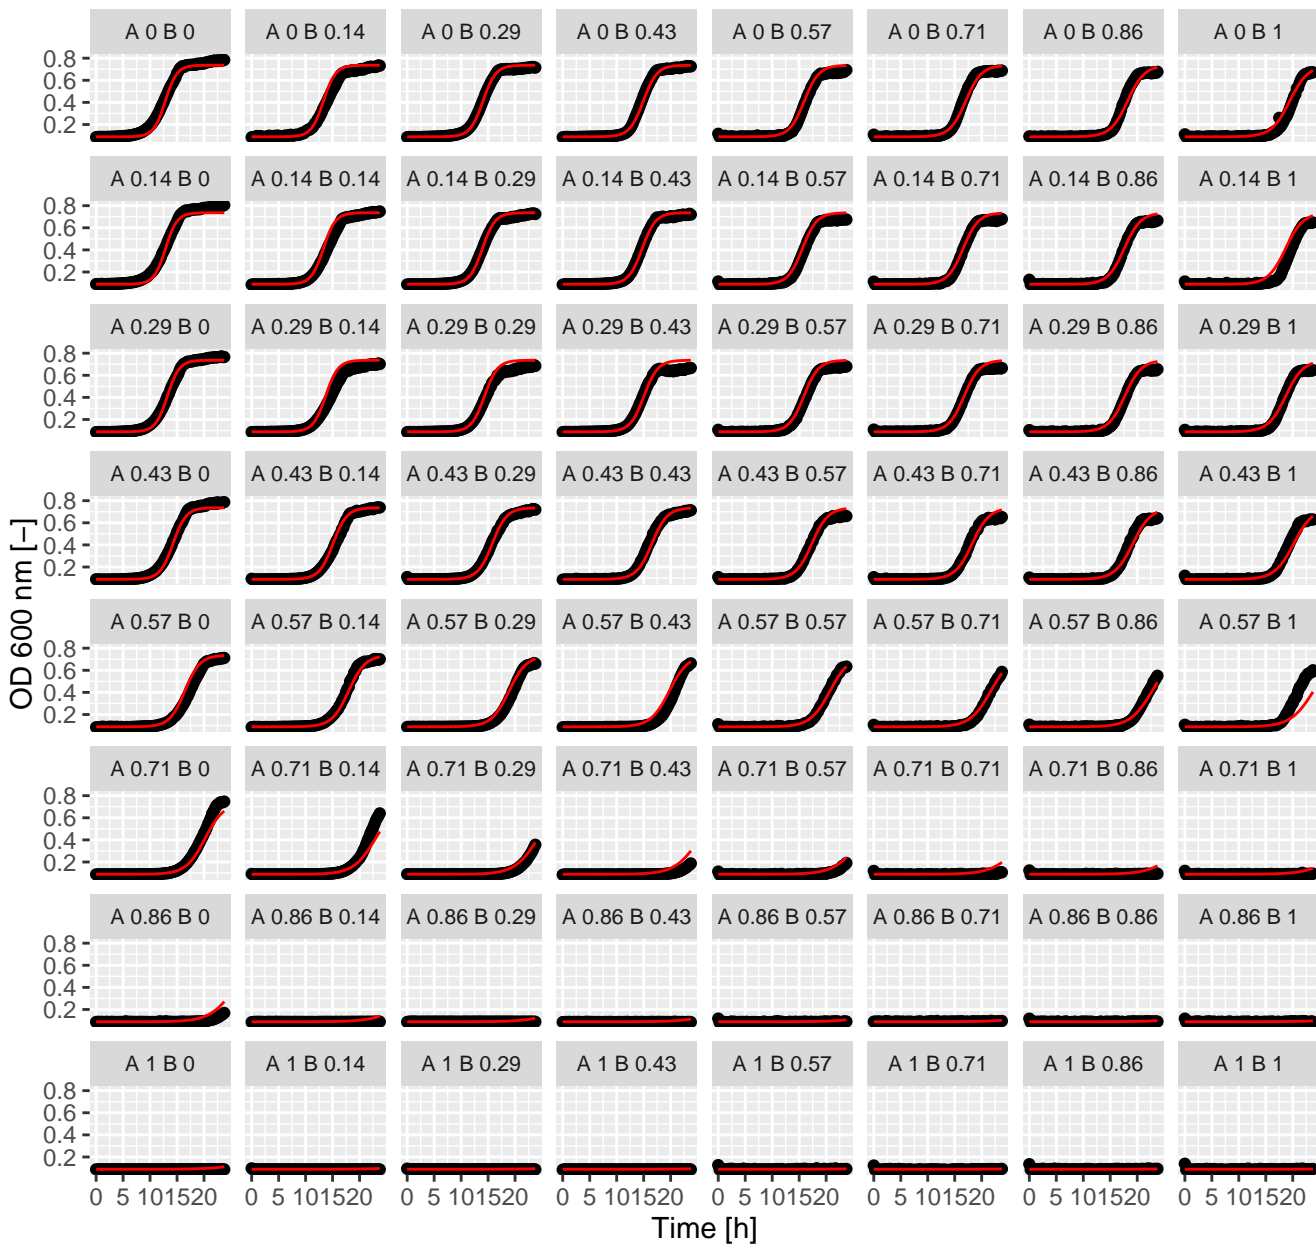

Bro.Cal (= Ax.Bx) exp. additivity (BI)  
Int\_AB = 0 and Int\_BA = 0 at EC50

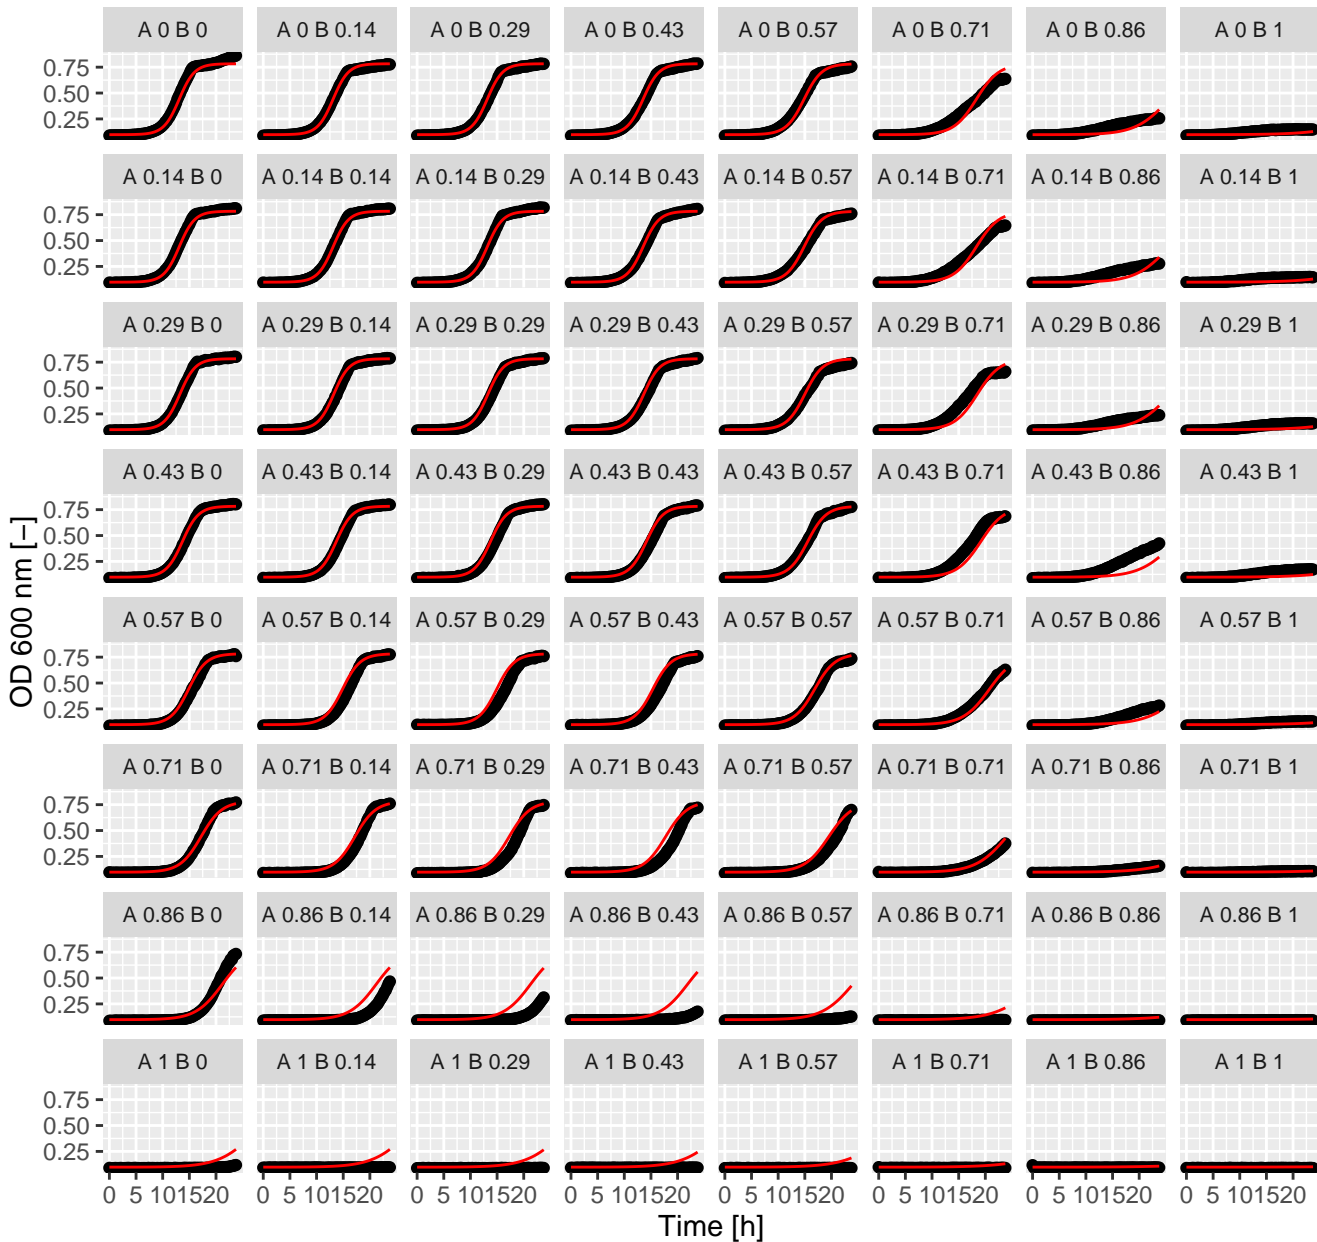

Bro.Cal (= Ax.Bx) full GPDI  
 Int\_AB = -0.14 and Int\_BA = 0.17 at EC50

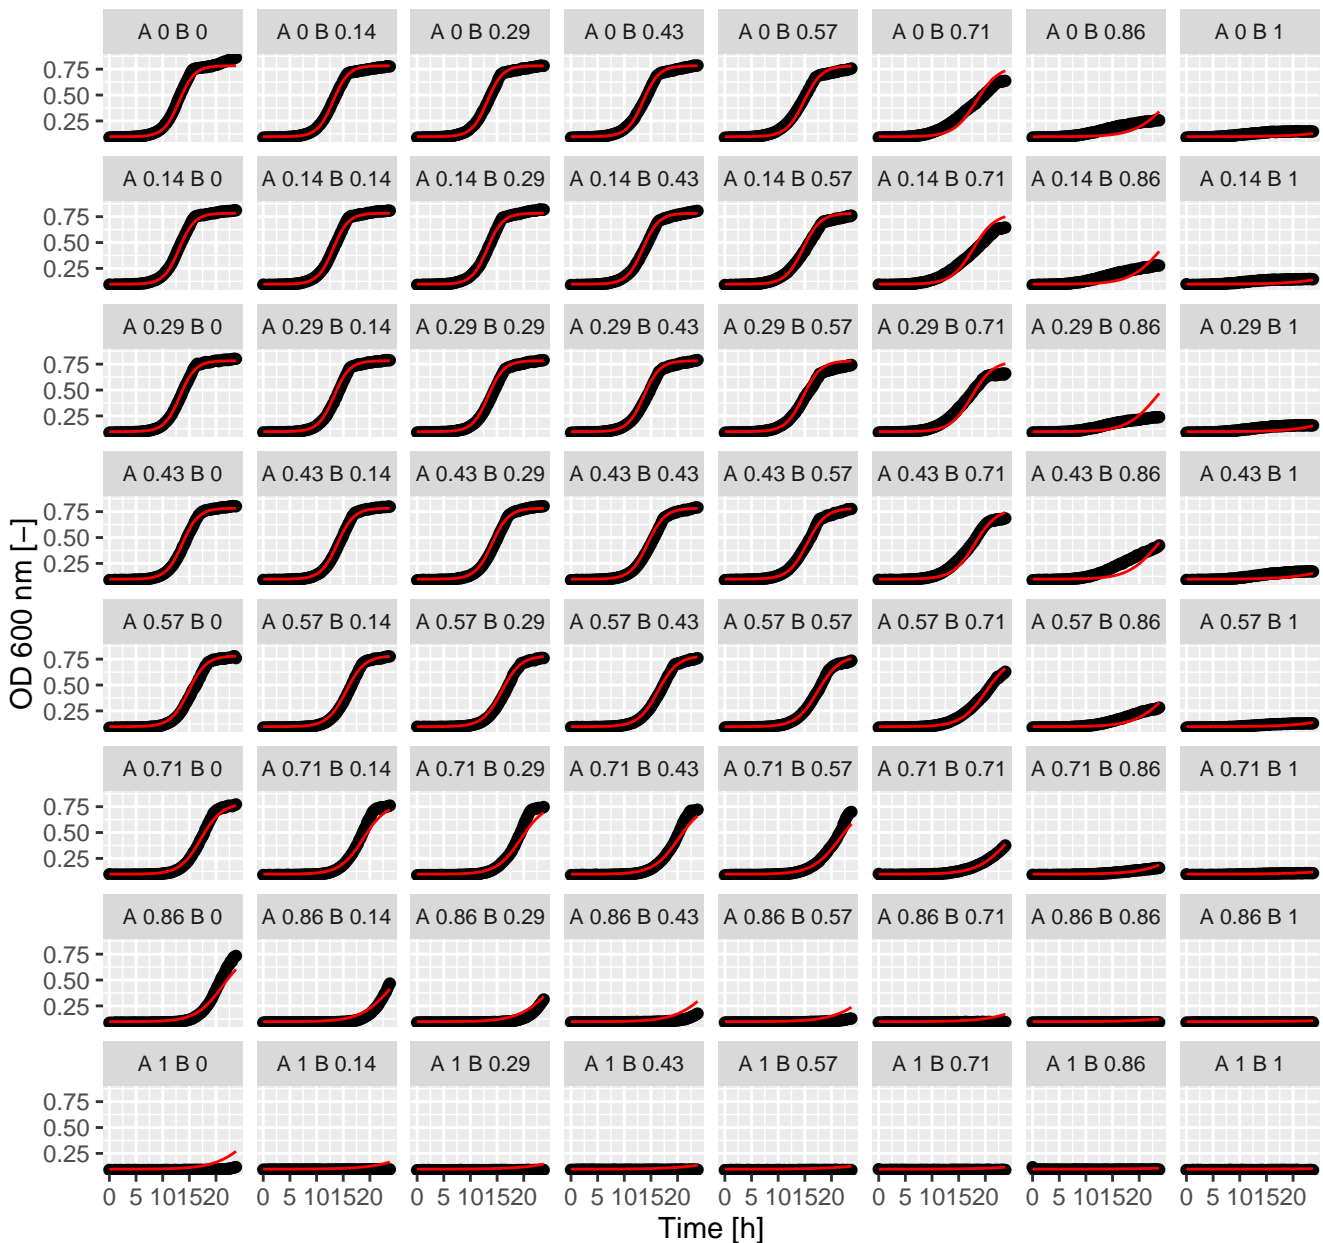



Bro.Bro (= Ax.Bx) exp. additivity (BI)  
Int\_AB = 0 and Int\_BA = 0 at EC50

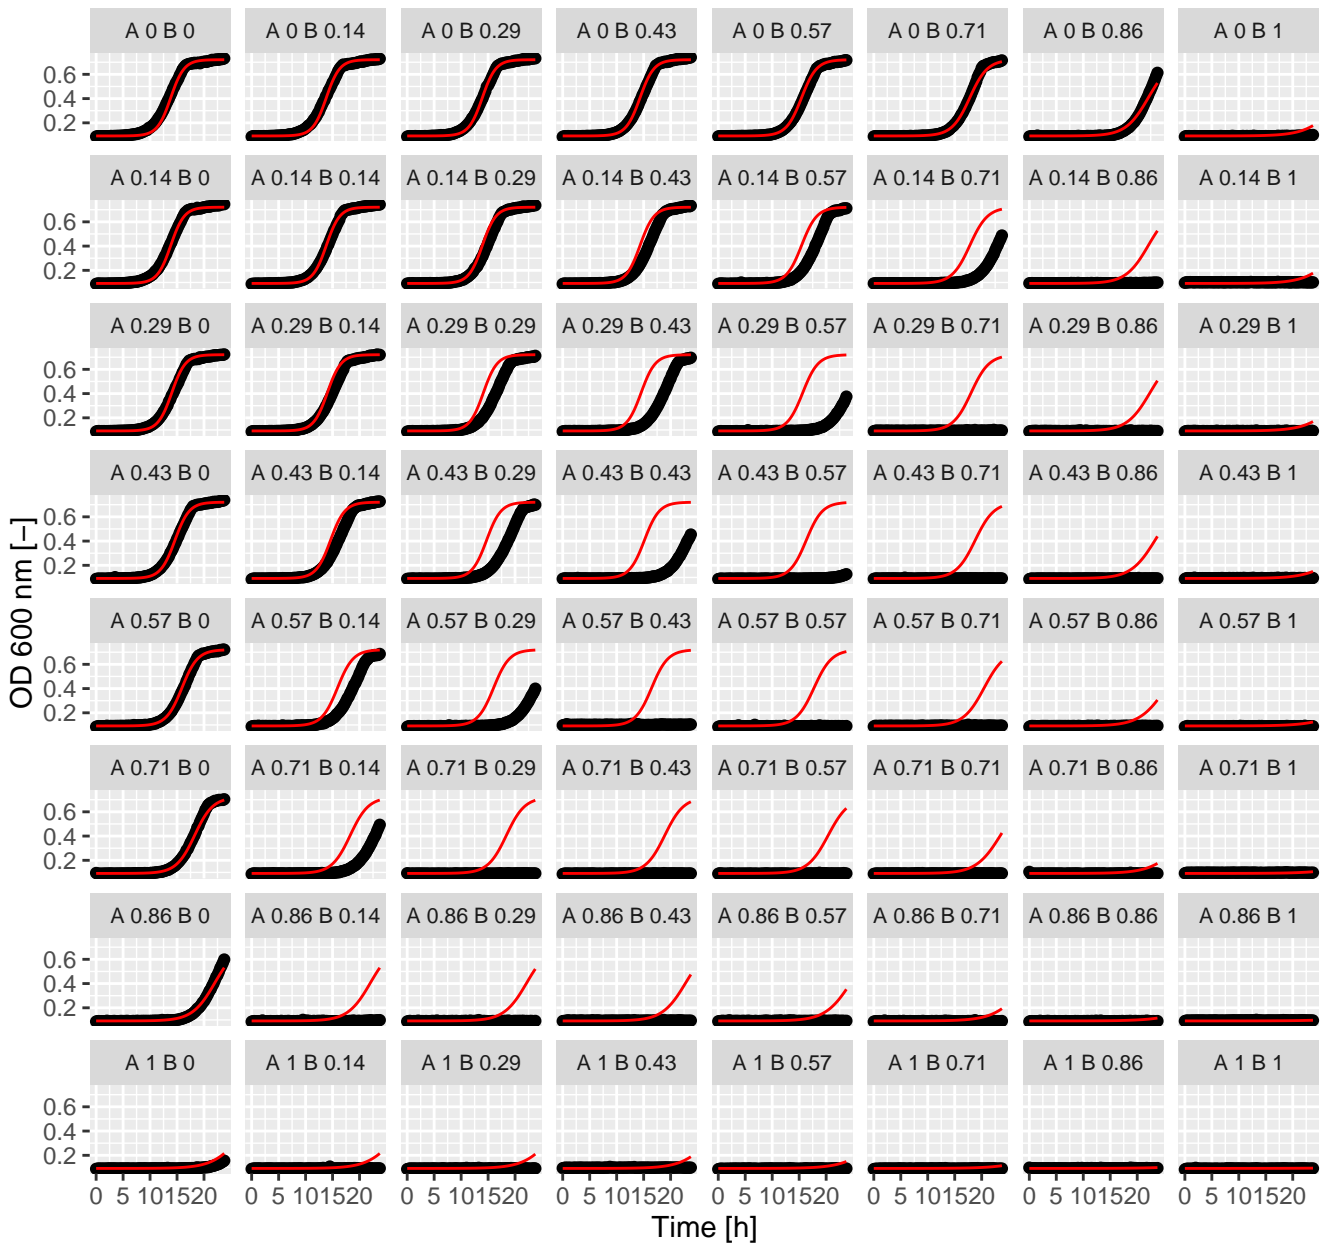

Bro.Bro (= Ax.Bx) full GPDI  
 Int\_AB = -0.63 and Int\_BA = -0.51 at EC50

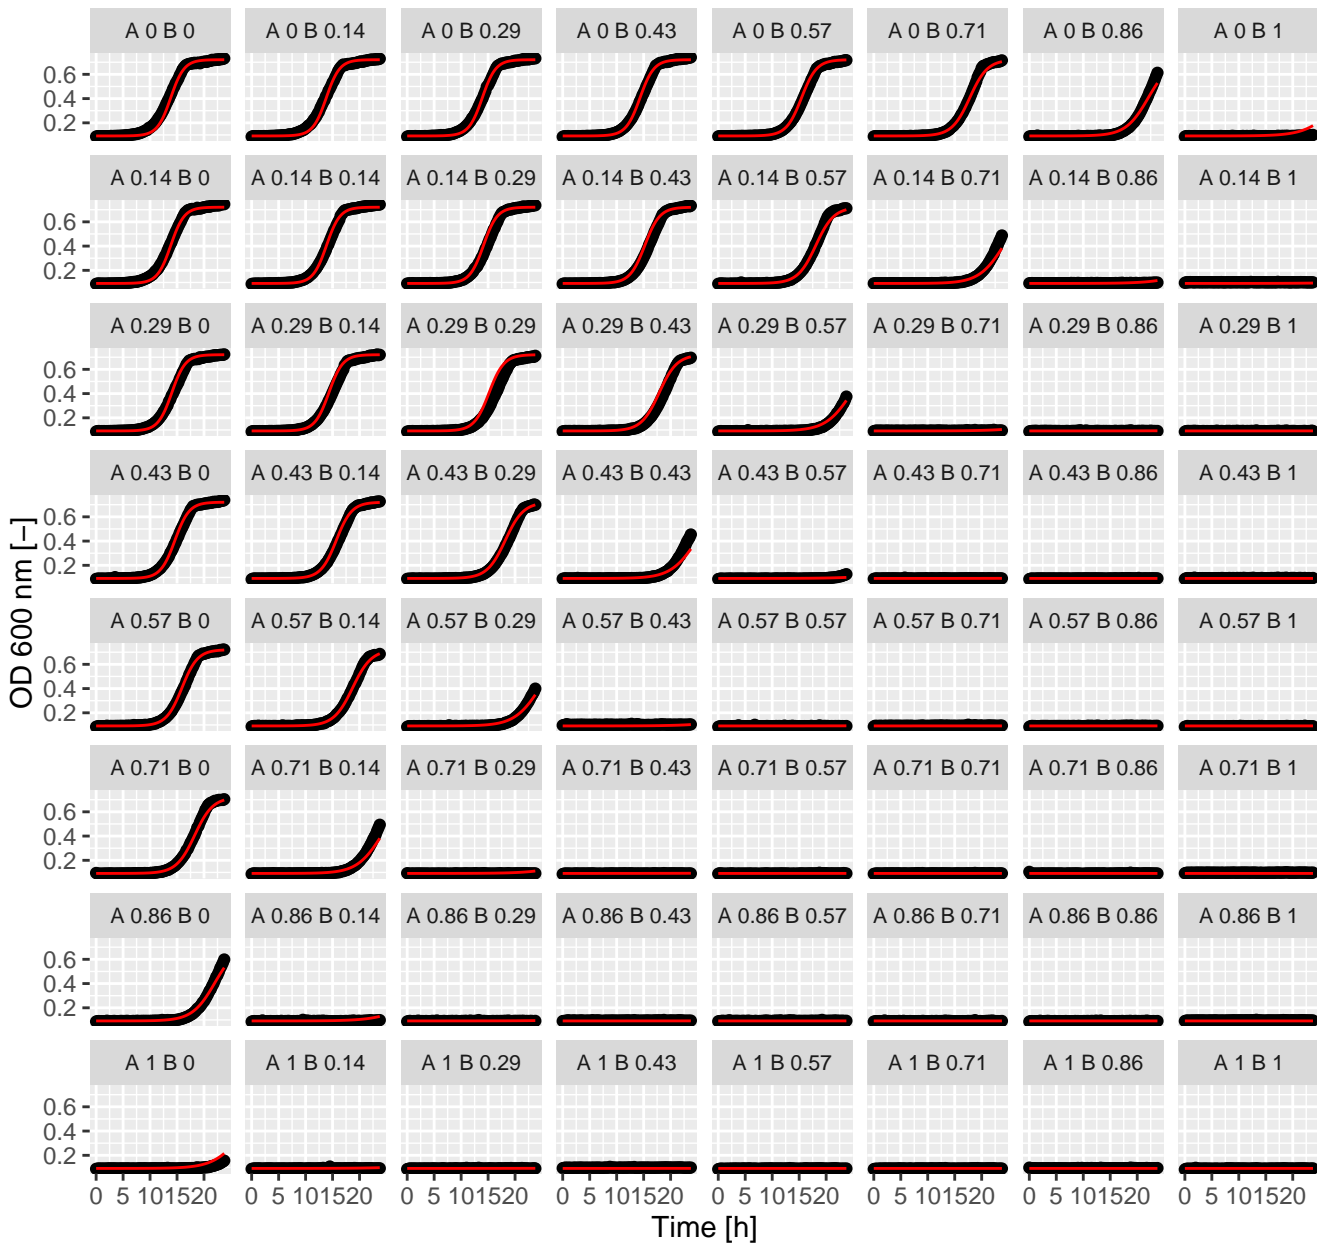

Ben.Tun (= Ax.Bx) exp. additivity (BI)  
Int\_AB = 0 and Int\_BA = 0 at EC50

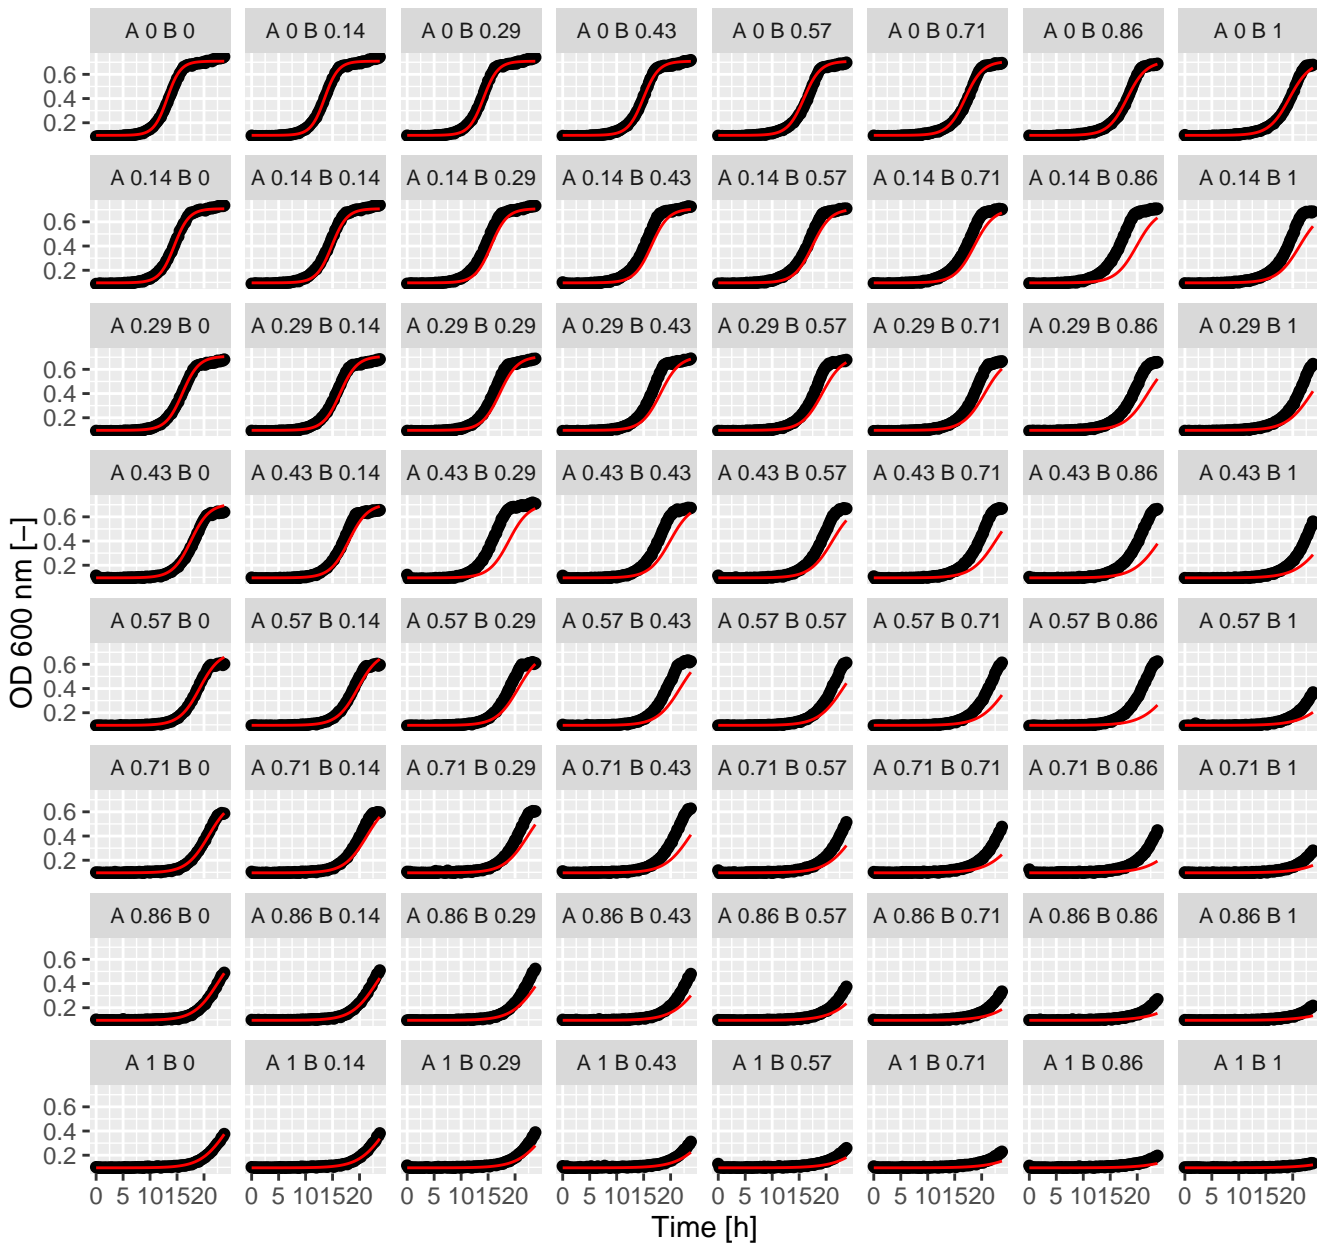

Ben.Tun (= Ax.Bx) full GPDI  
Int\_AB = 0.2 and Int\_BA = 0.39 at EC50

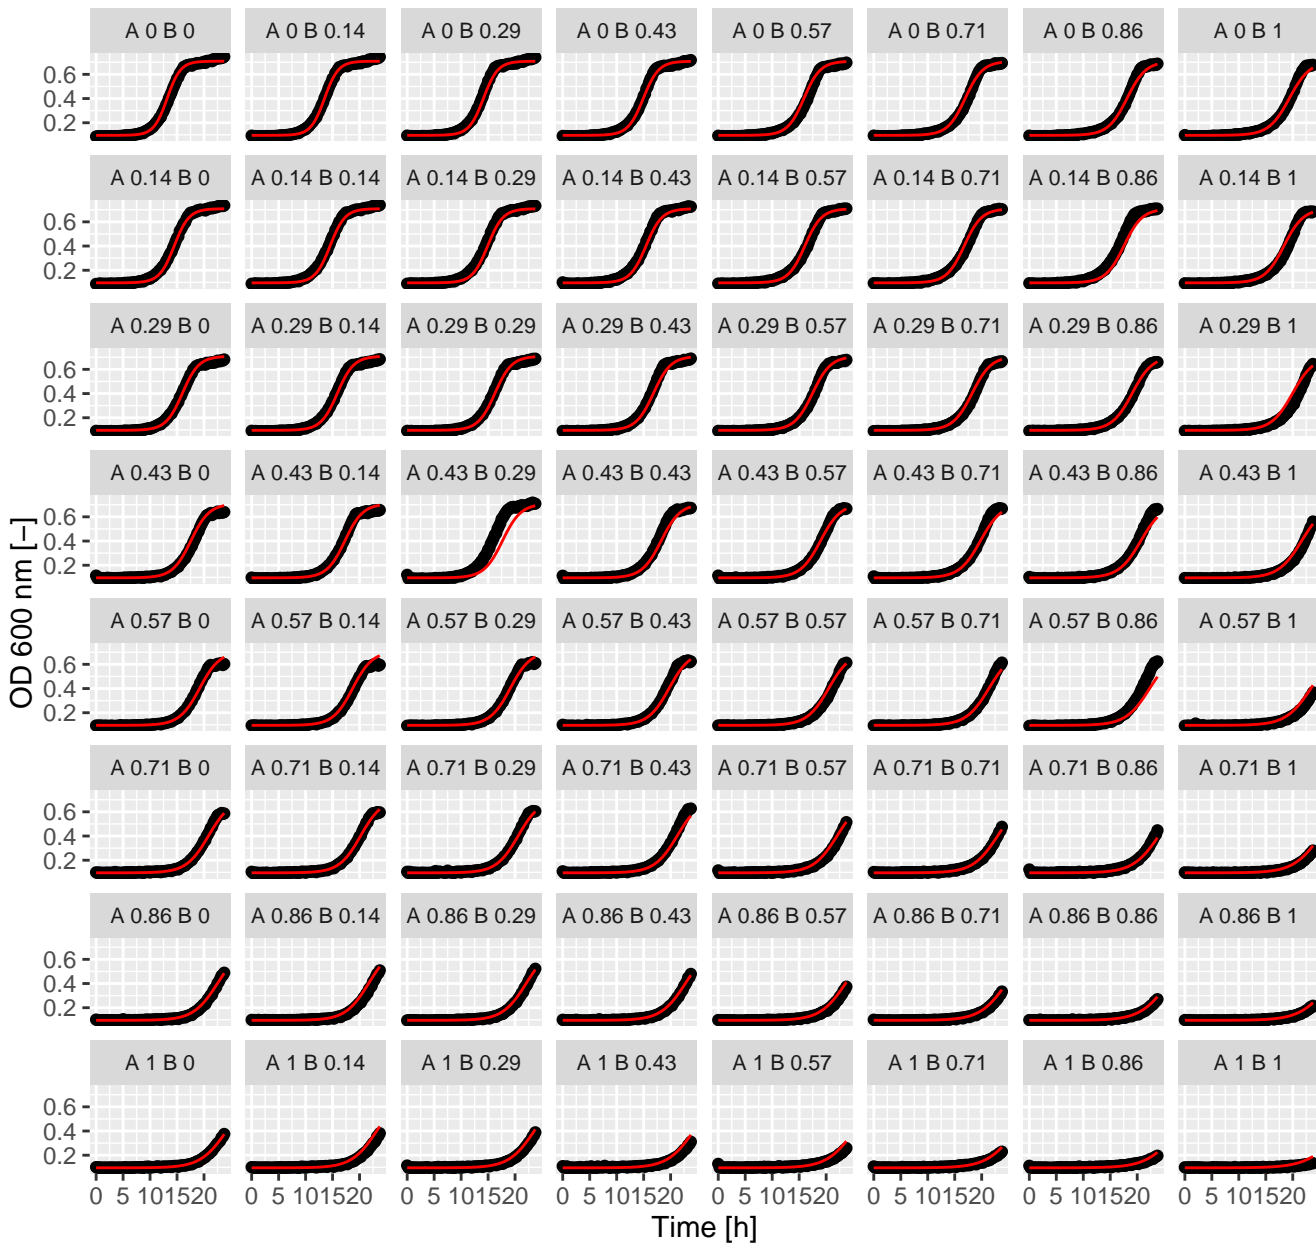

Ben.Ter (= Ax.Bx) exp. additivity (BI)  
Int\_AB = 0 and Int\_BA = 0 at EC50

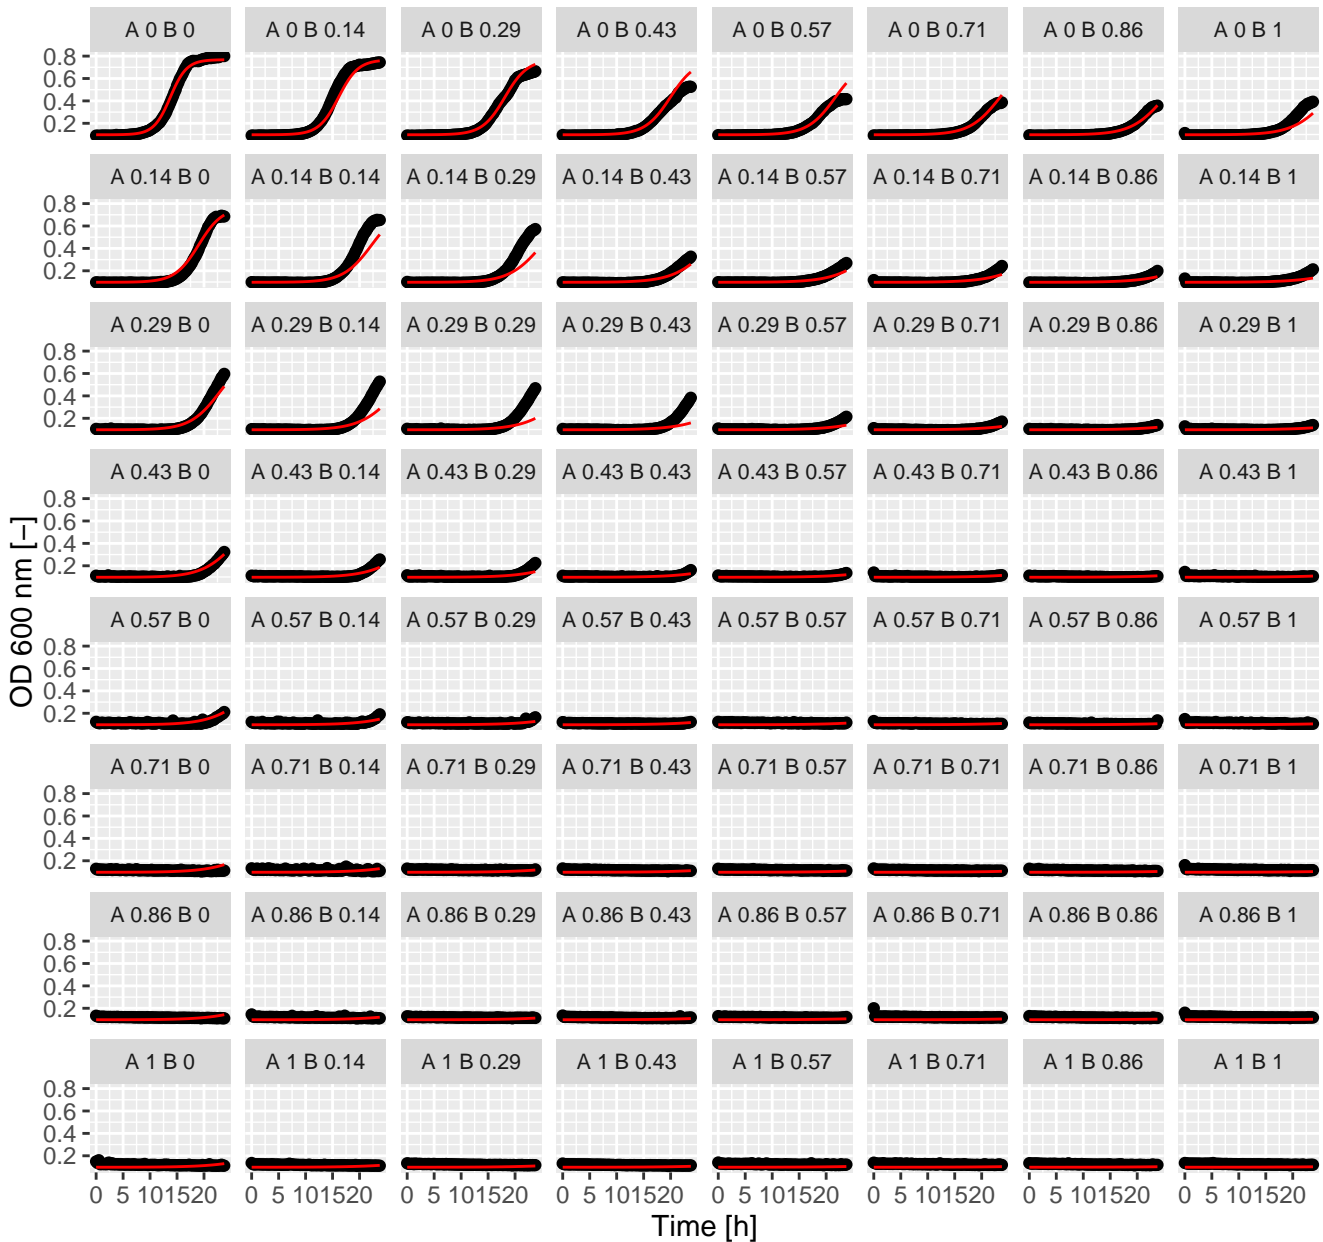

Ben.Ter (= Ax.Bx) full GPDI  
Int\_AB = 0.67 and Int\_BA = 0.12 at EC50

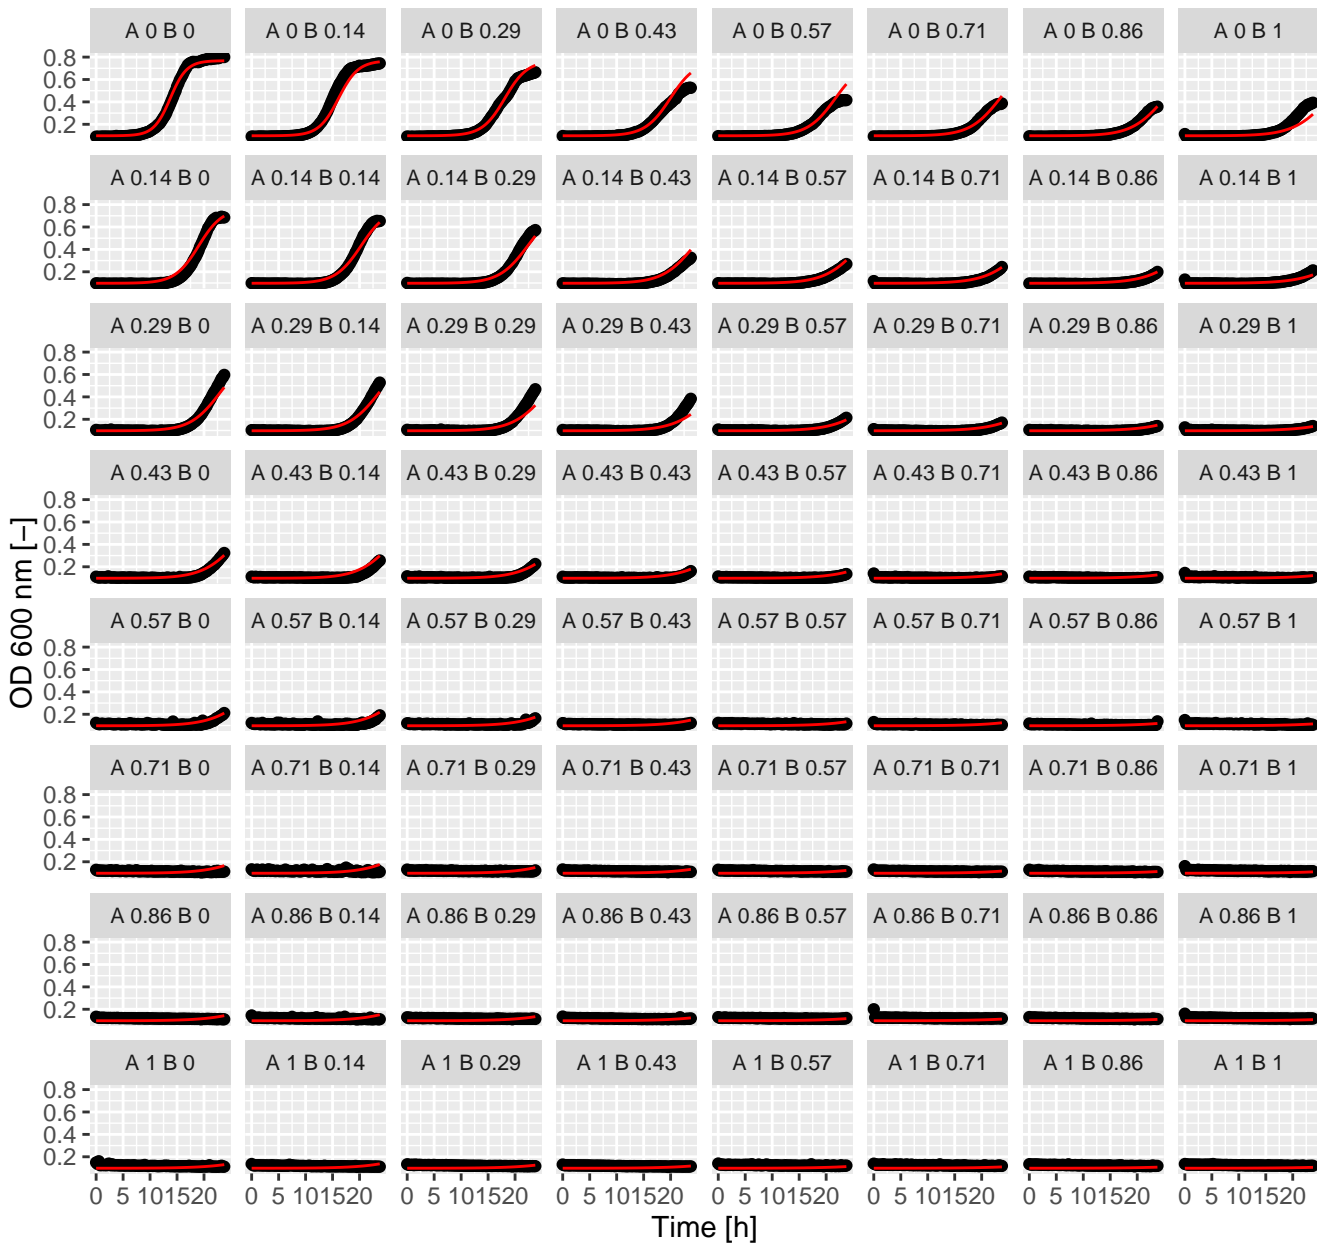

Ben.Tac (= Ax.Bx) exp. additivity (BI)  
Int\_AB = 0 and Int\_BA = 0 at EC50

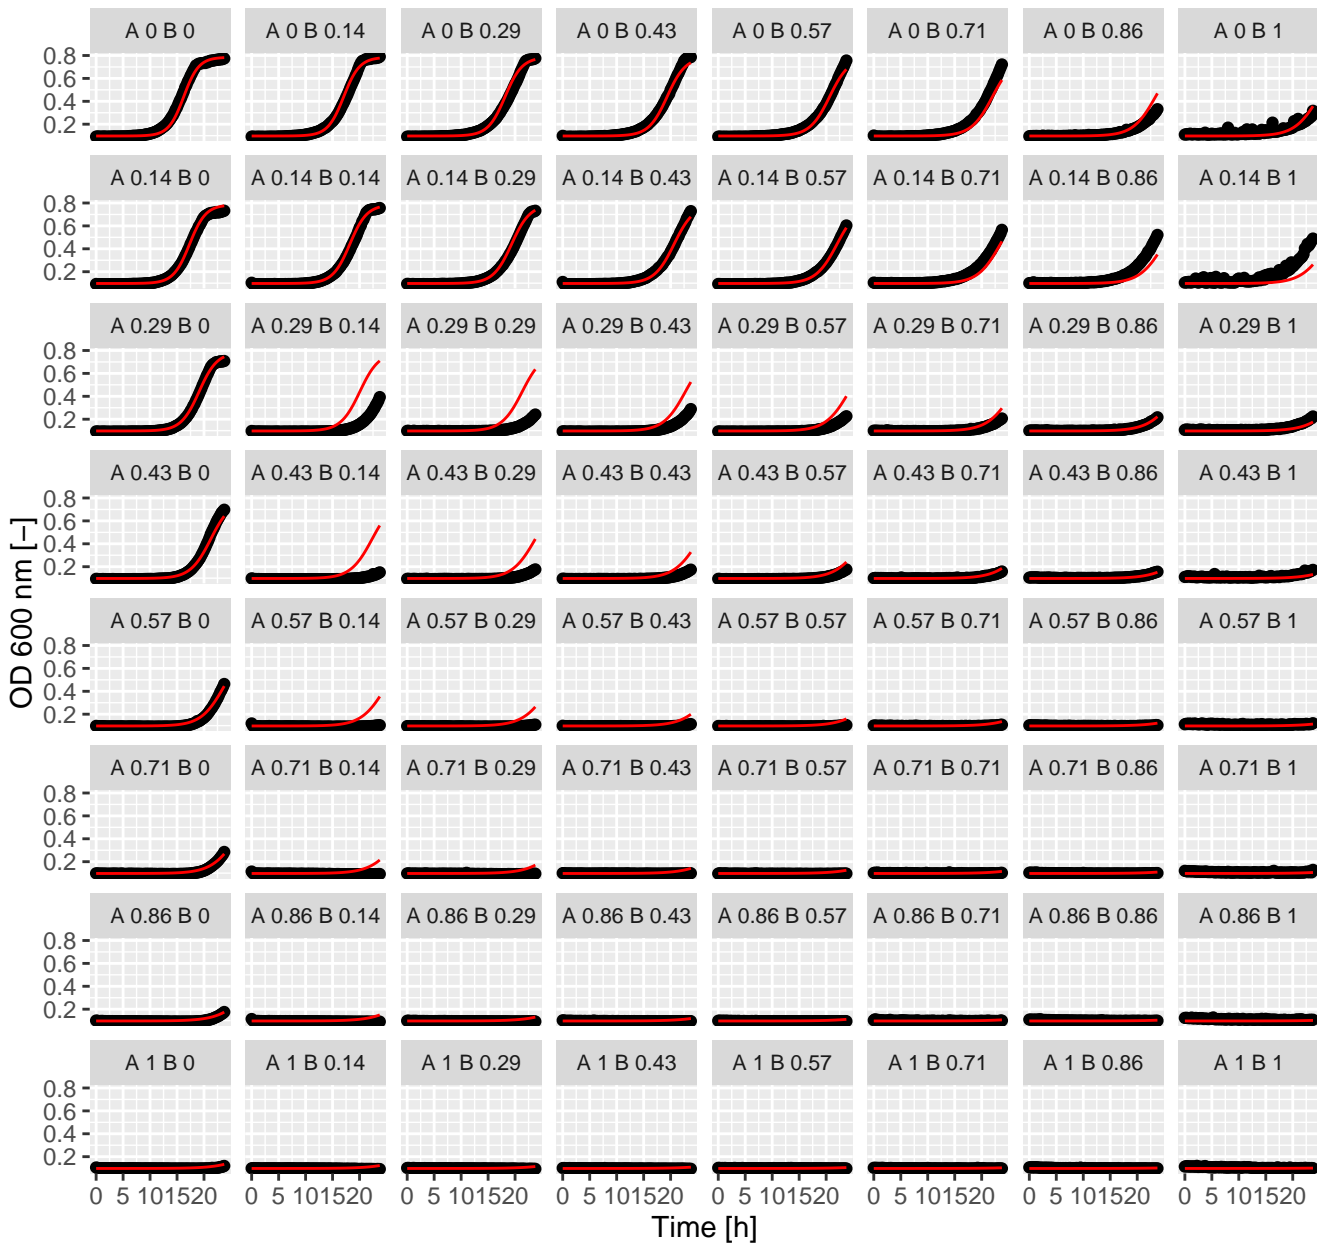

Ben.Tac (= Ax.Bx) full GPDI  
Int\_AB = -0.63 and Int\_BA = 14.4 at EC50

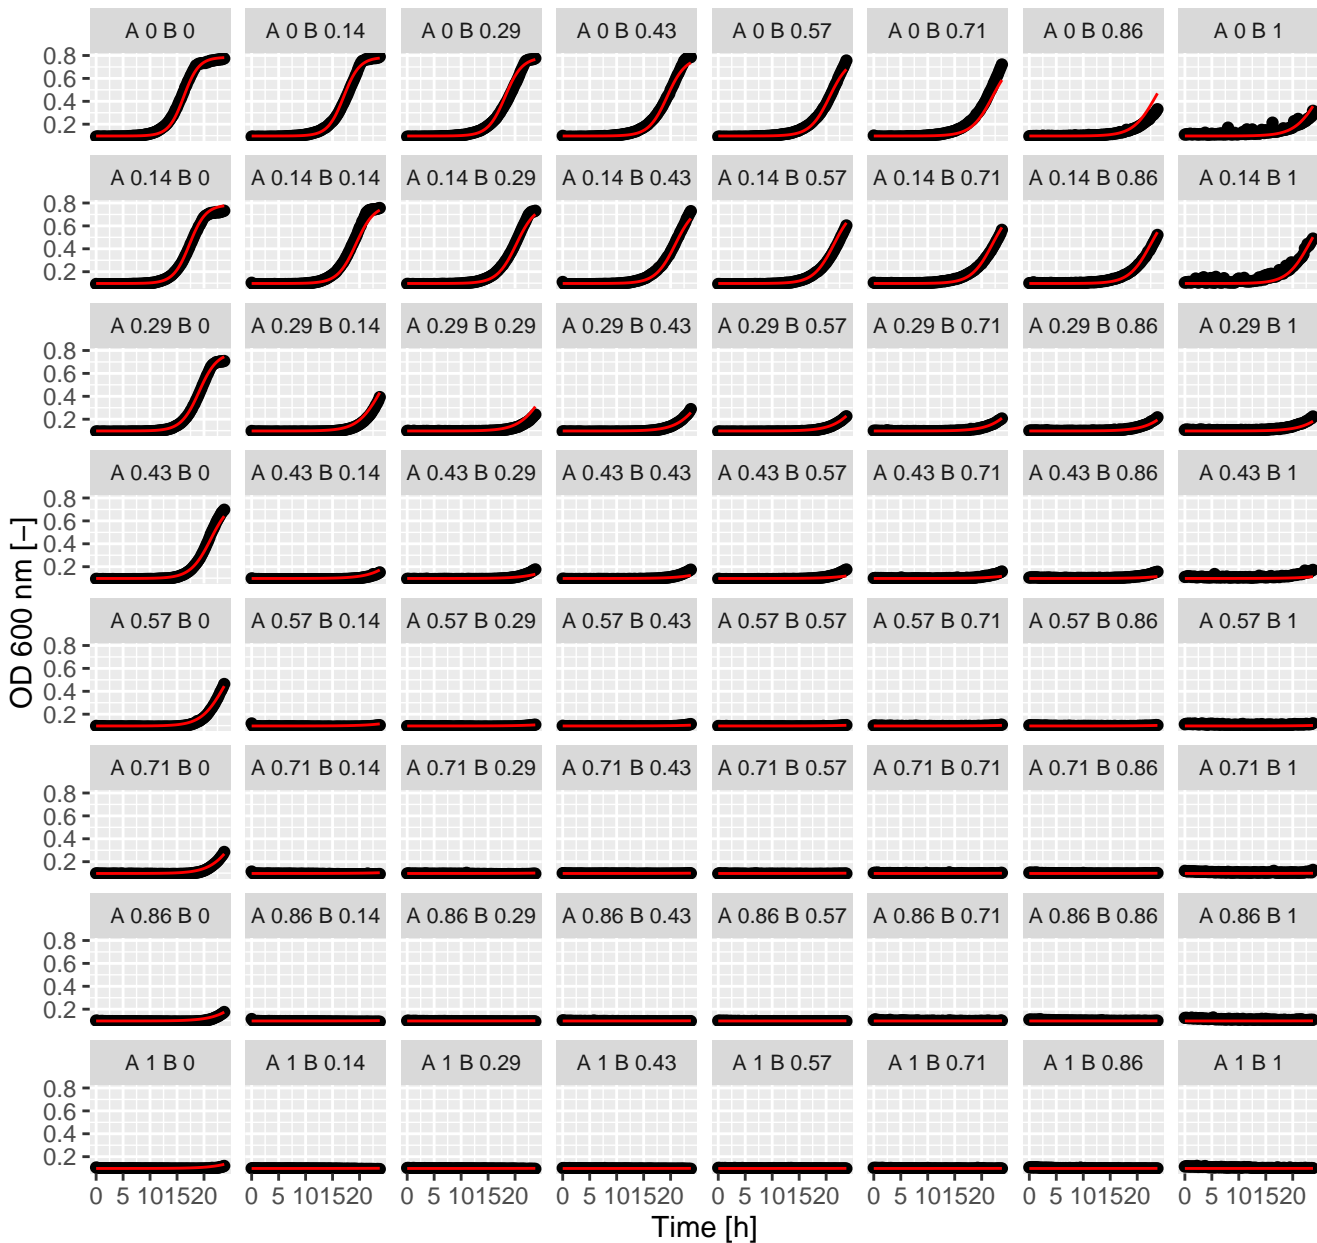



Ben.Sta (= Ax.Bx) exp. additivity (BI)  
Int\_AB = 0 and Int\_BA = 0 at EC50

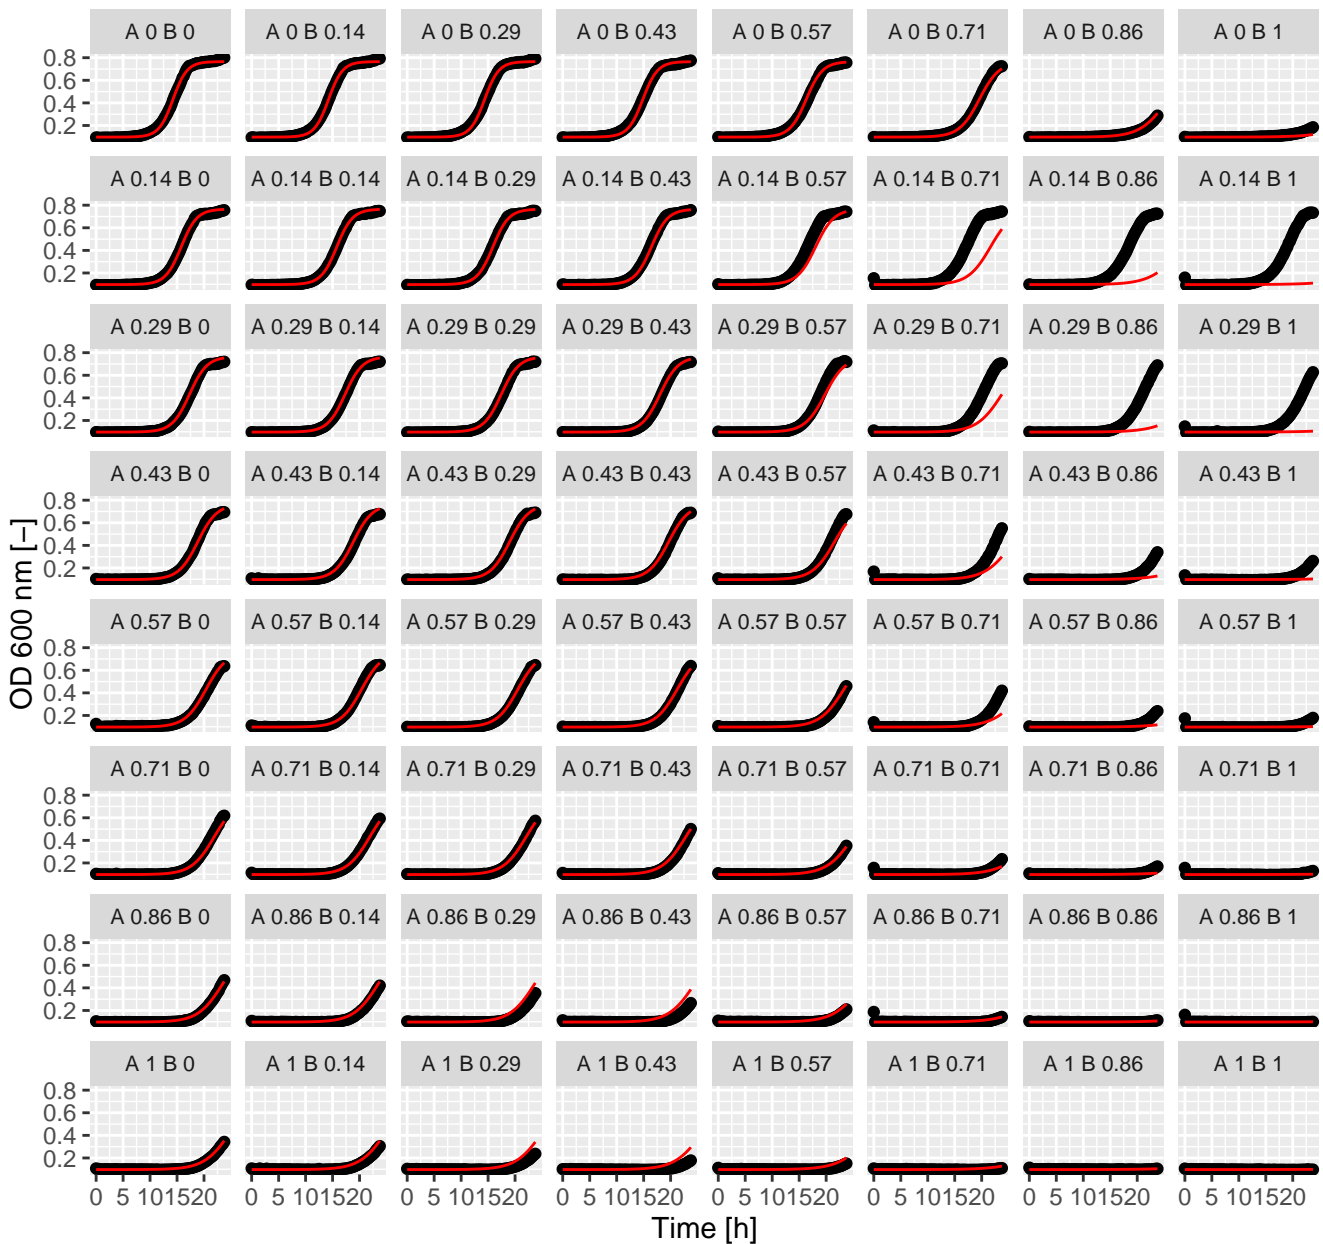

Ben.Sta (= Ax.Bx) full GPDI  
Int\_AB = -0.34 and Int\_BA = 0.63 at EC50

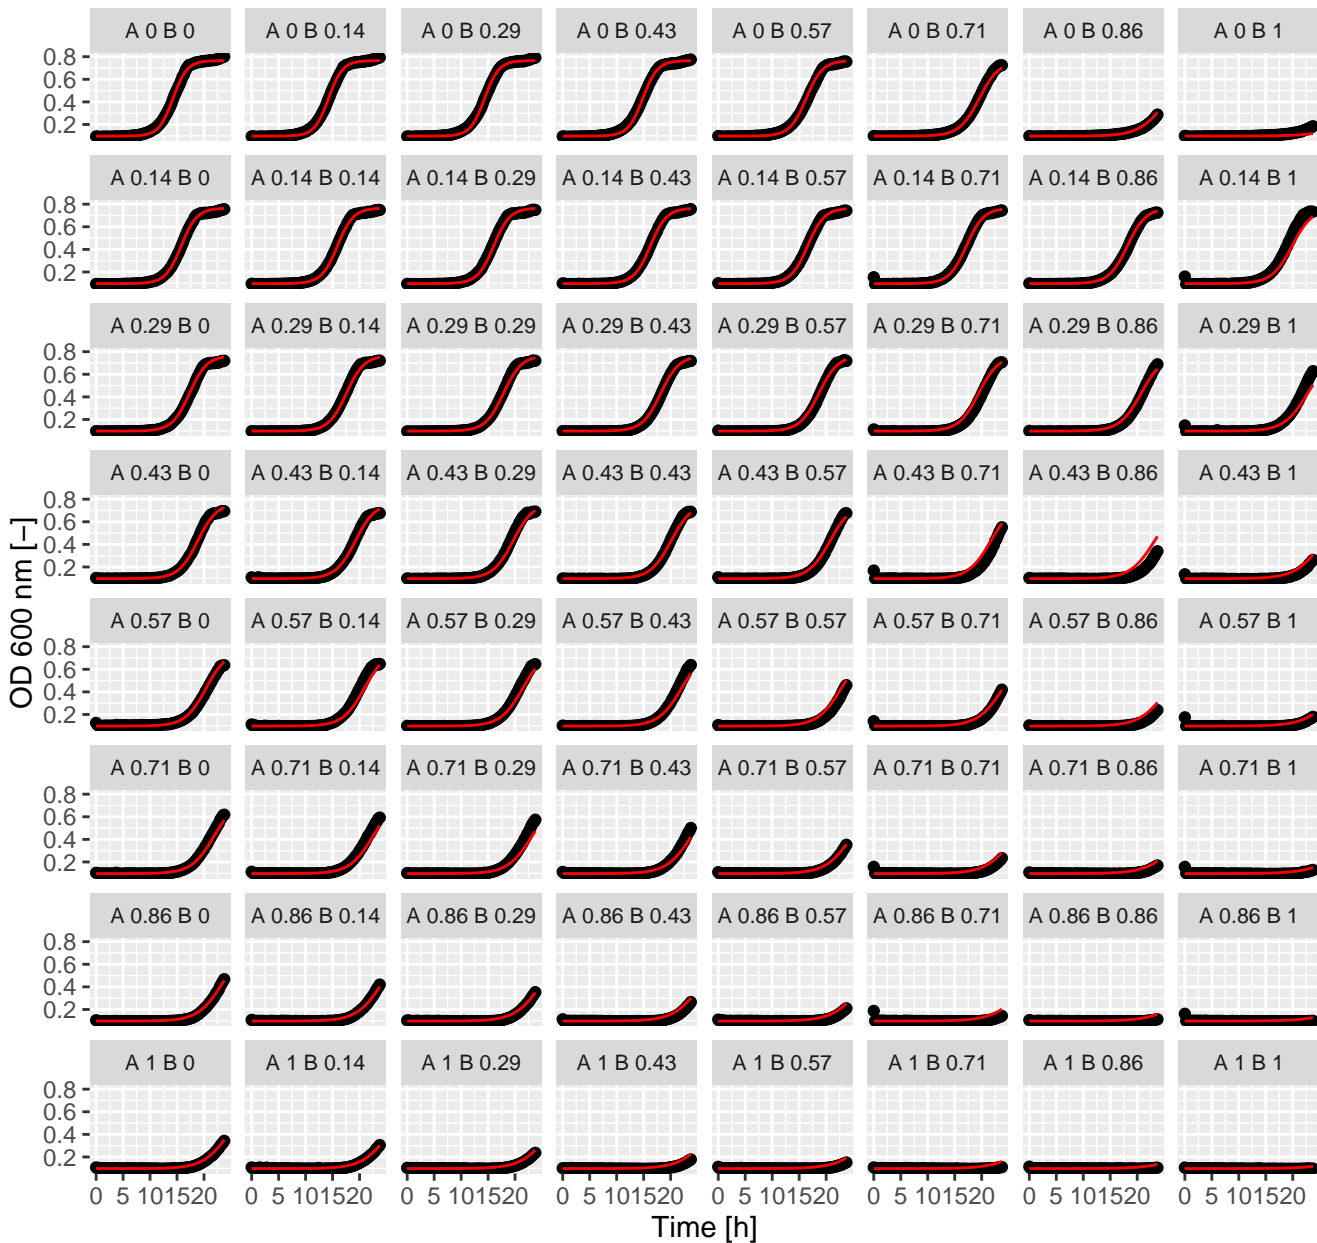

Ben.Rap (= Ax.Bx) exp. additivity (BI)  
Int\_AB = 0 and Int\_BA = 0 at EC50

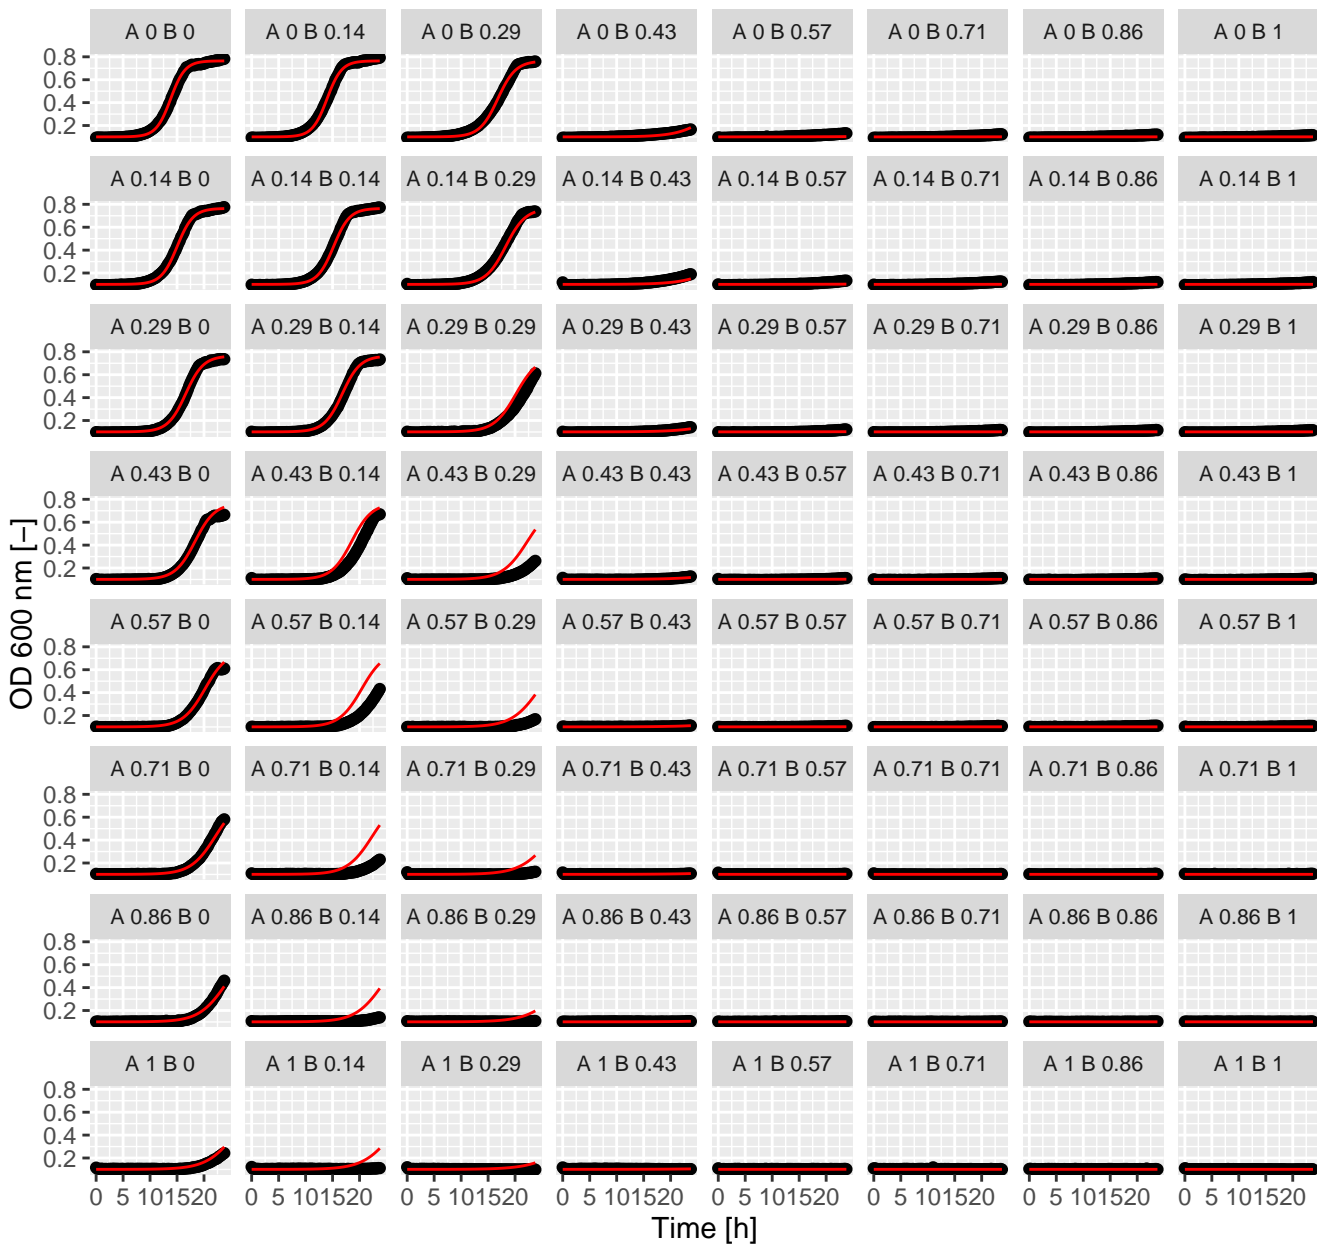

Ben.Rap (= Ax.Bx) full GPD1  
Int\_AB = -0.5 and Int\_BA = 0.13 at EC50

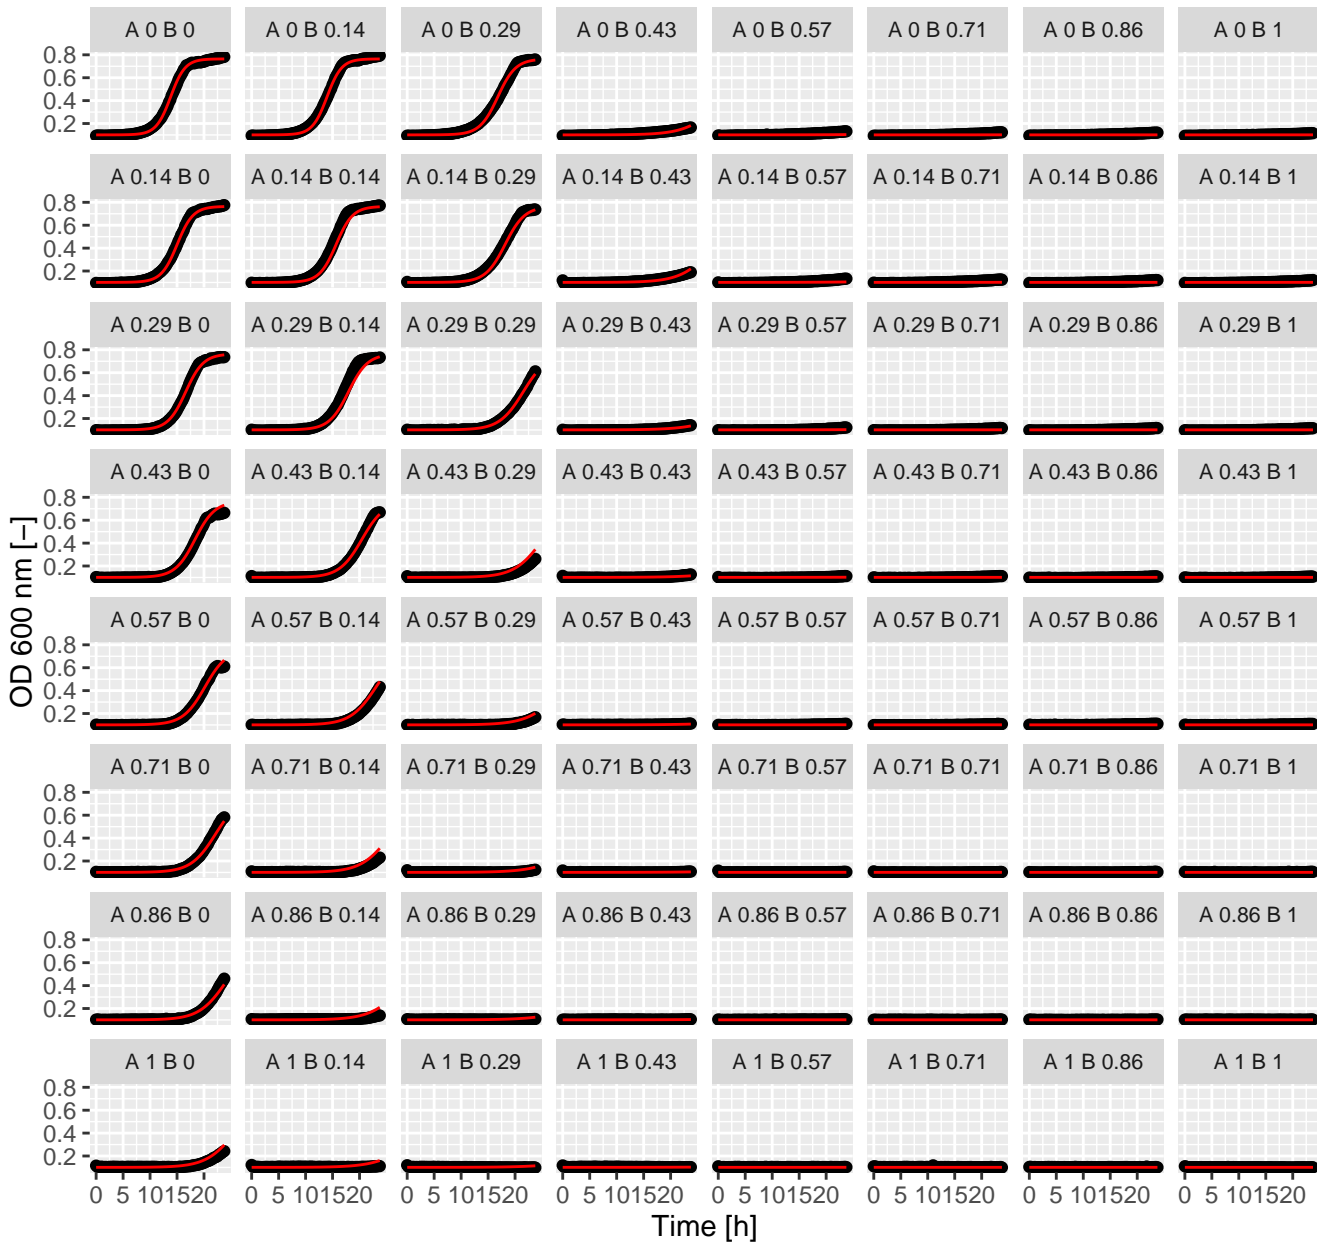

Ben.Rad (= Ax.Bx) exp. additivity (BI)  
Int\_AB = 0 and Int\_BA = 0 at EC50

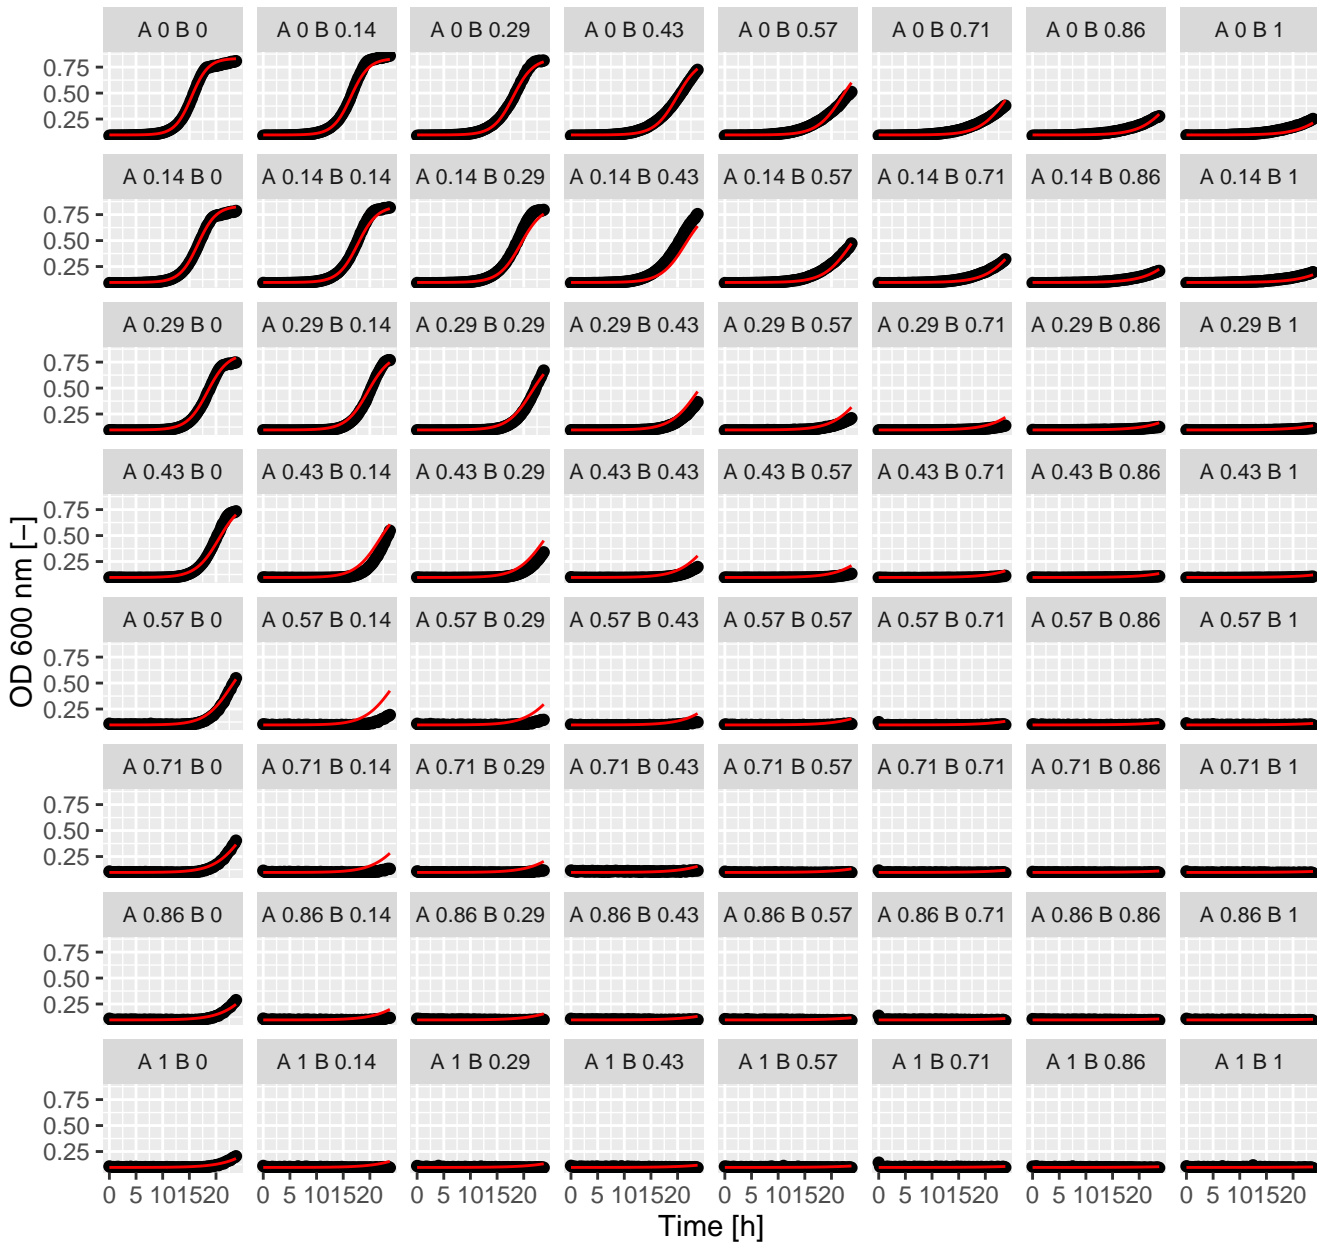

Ben.Rad (= Ax.Bx) full GPDI  
Int\_AB = -0.16 and Int\_BA = -0.01 at EC50

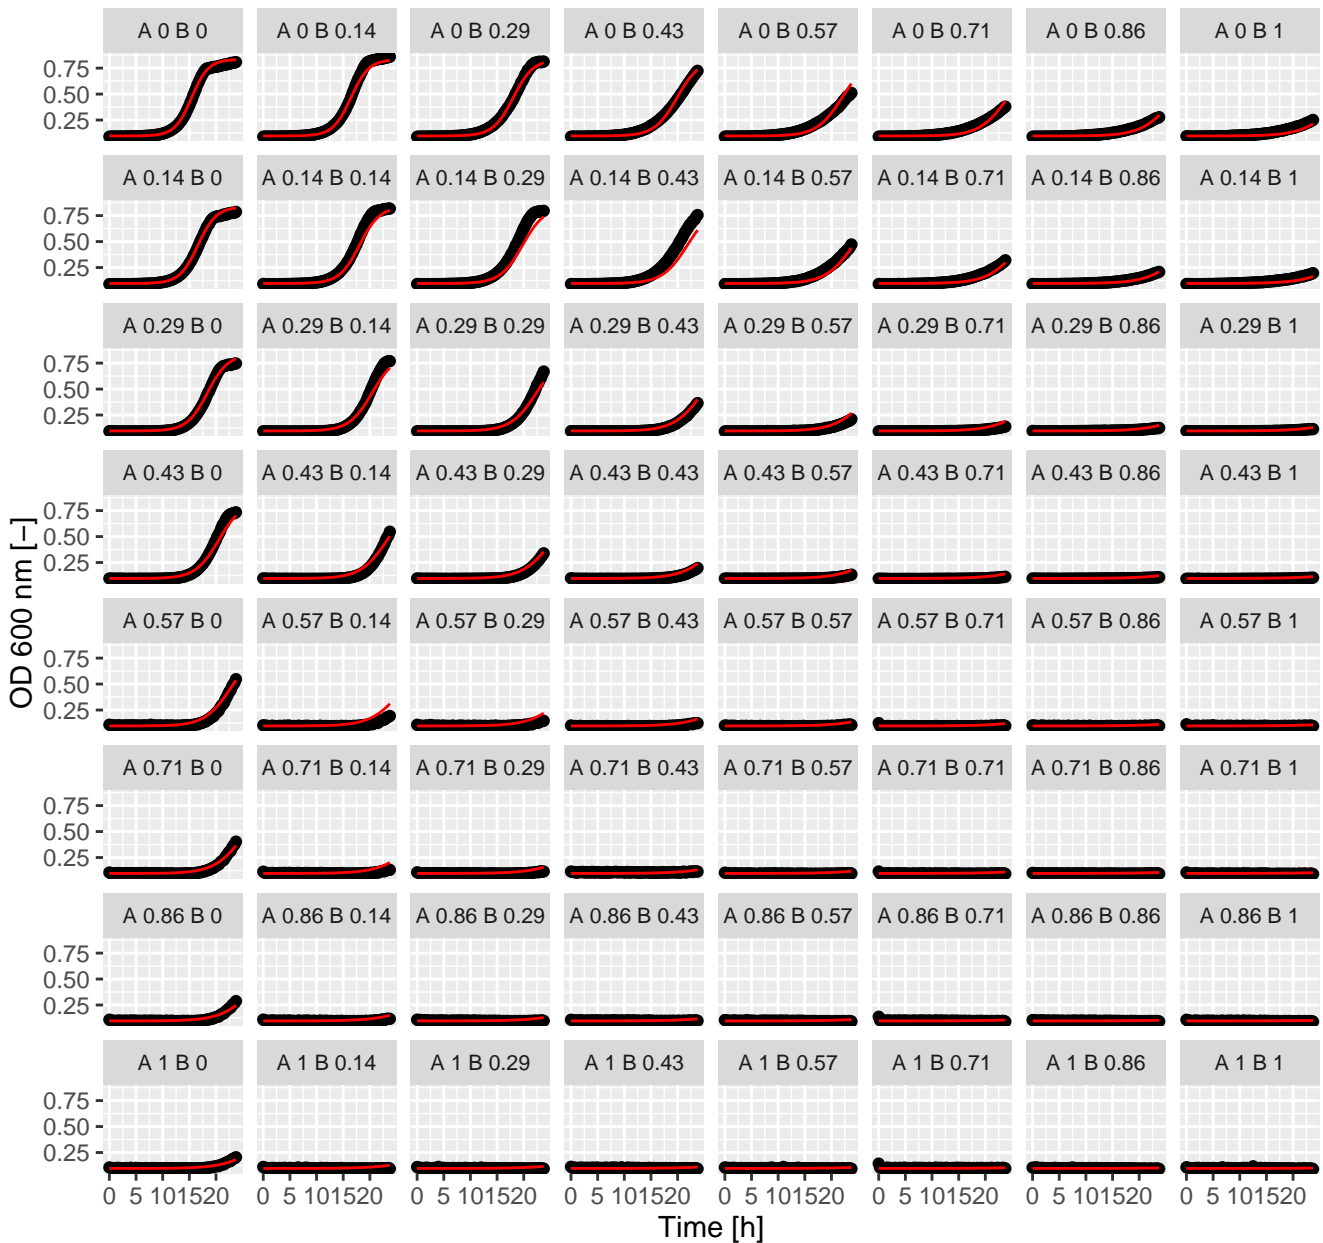

Ben.Qmy (= Ax.Bx) exp. additivity (BI)  
Int\_AB = 0 and Int\_BA = 0 at EC50

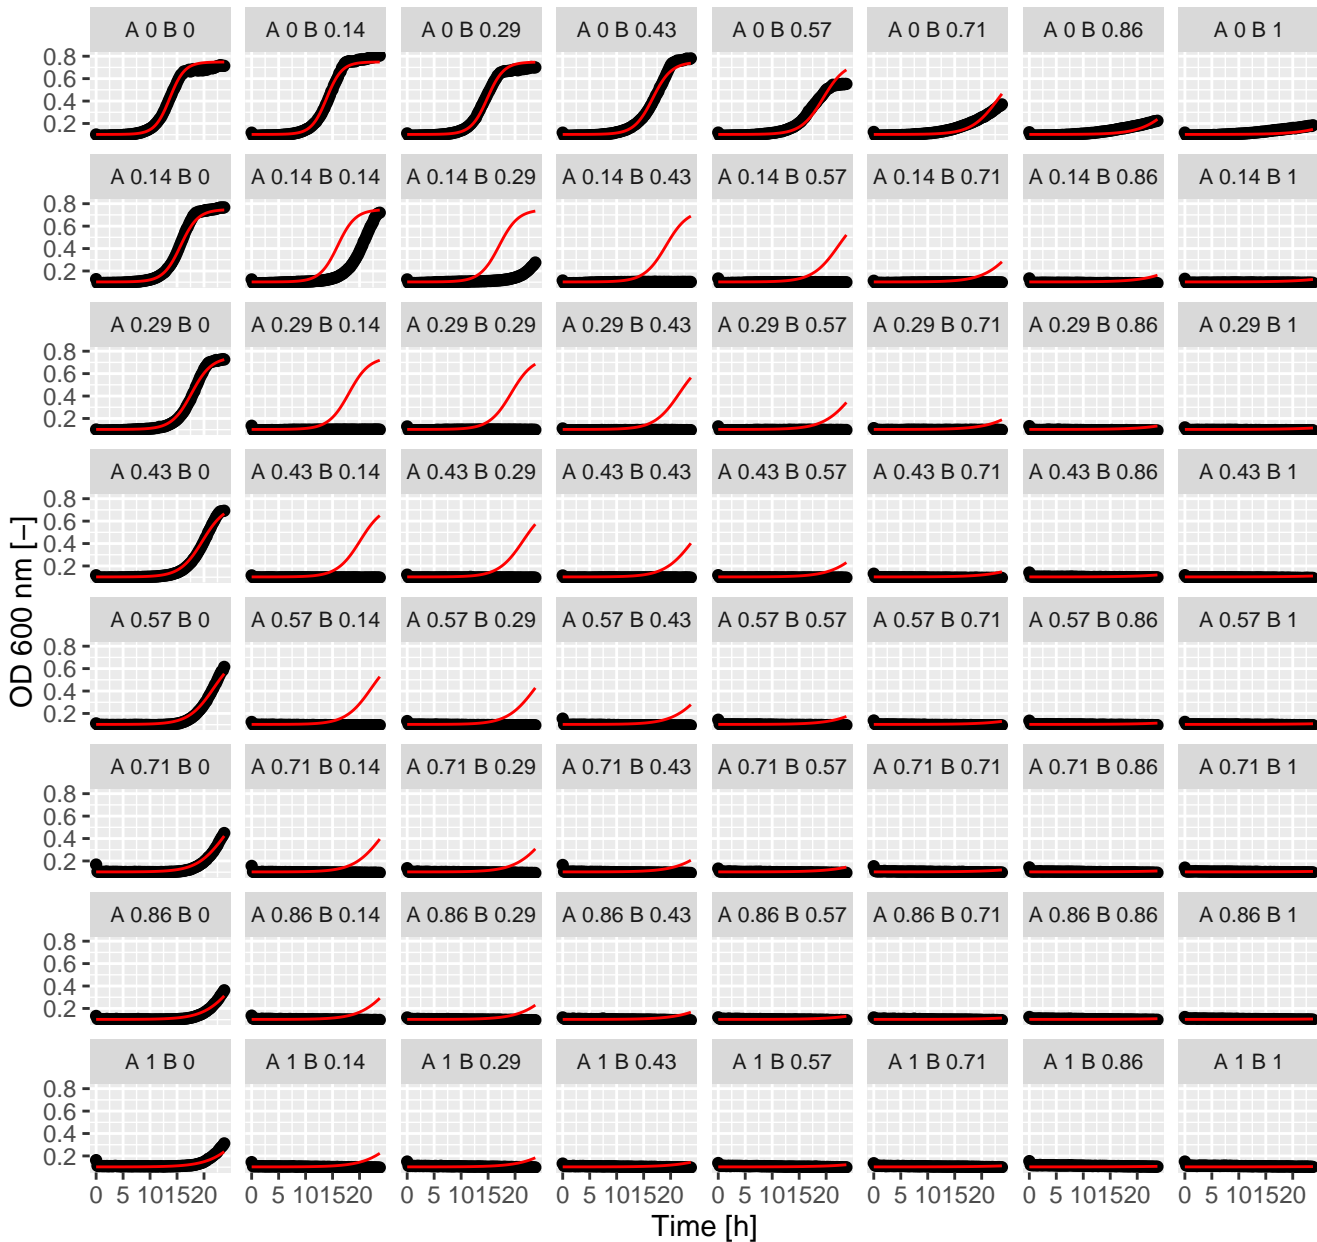

Ben.Qmy (= Ax.Bx) full GPDI  
Int\_AB = -0.44 and Int\_BA = -0.91 at EC50

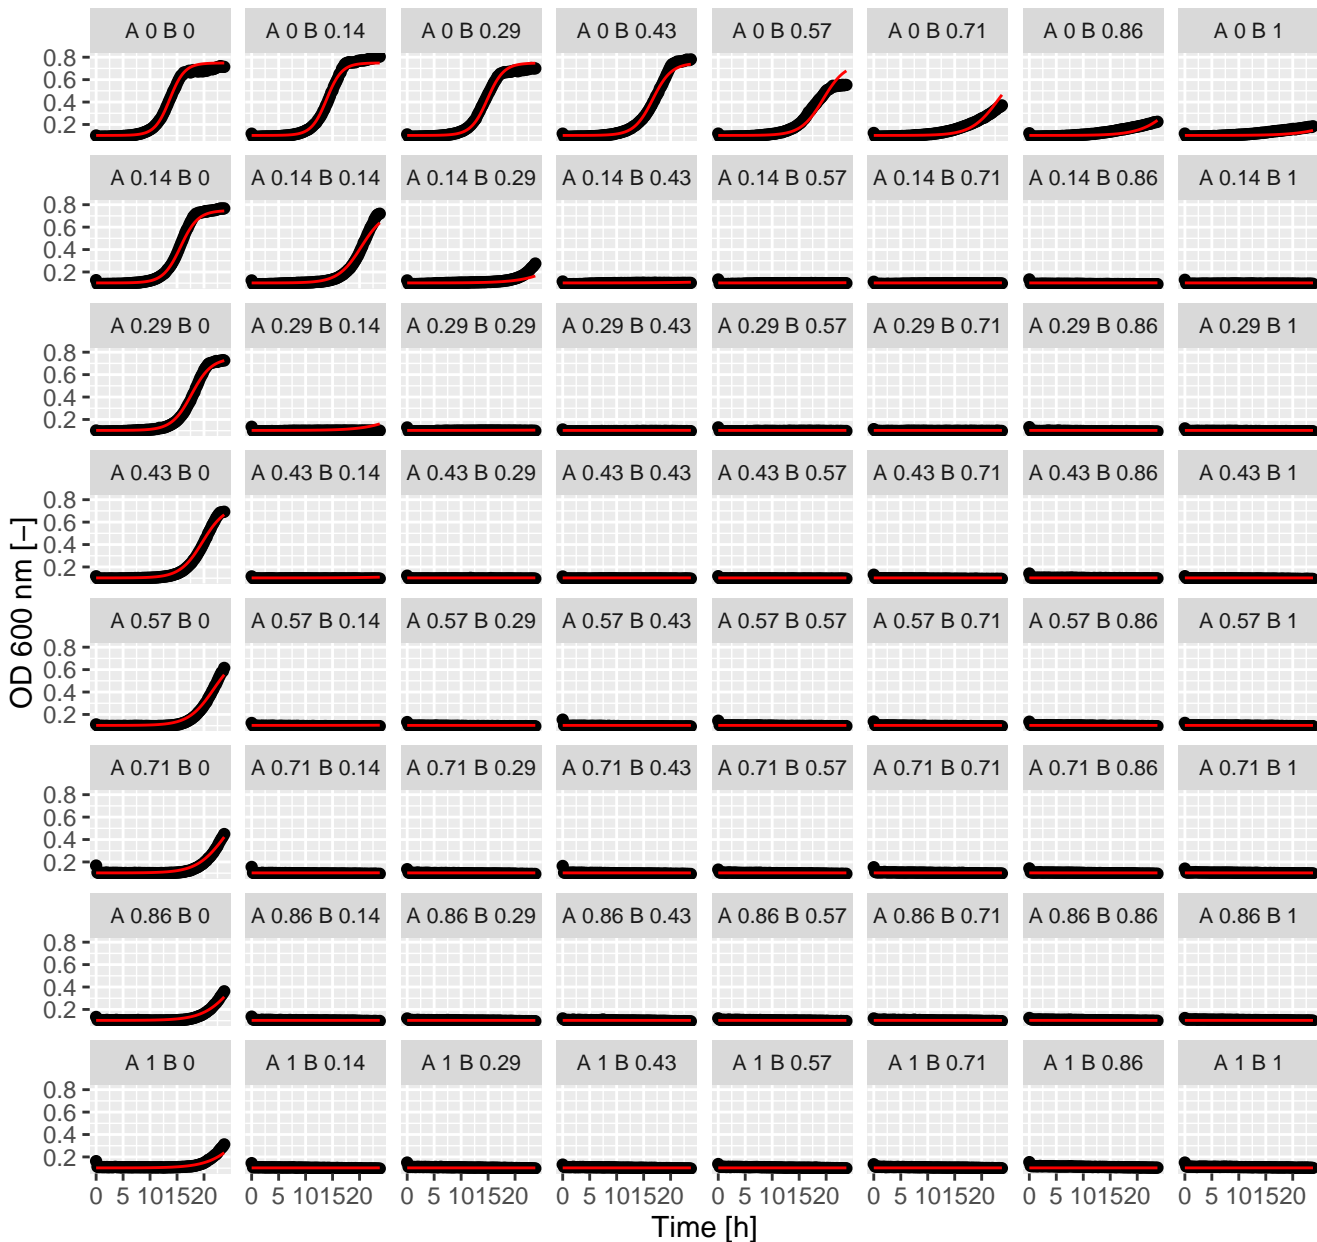



Ben.Pen (= Ax.Bx) exp. additivity (BI)  
Int\_AB = 0 and Int\_BA = 0 at EC50

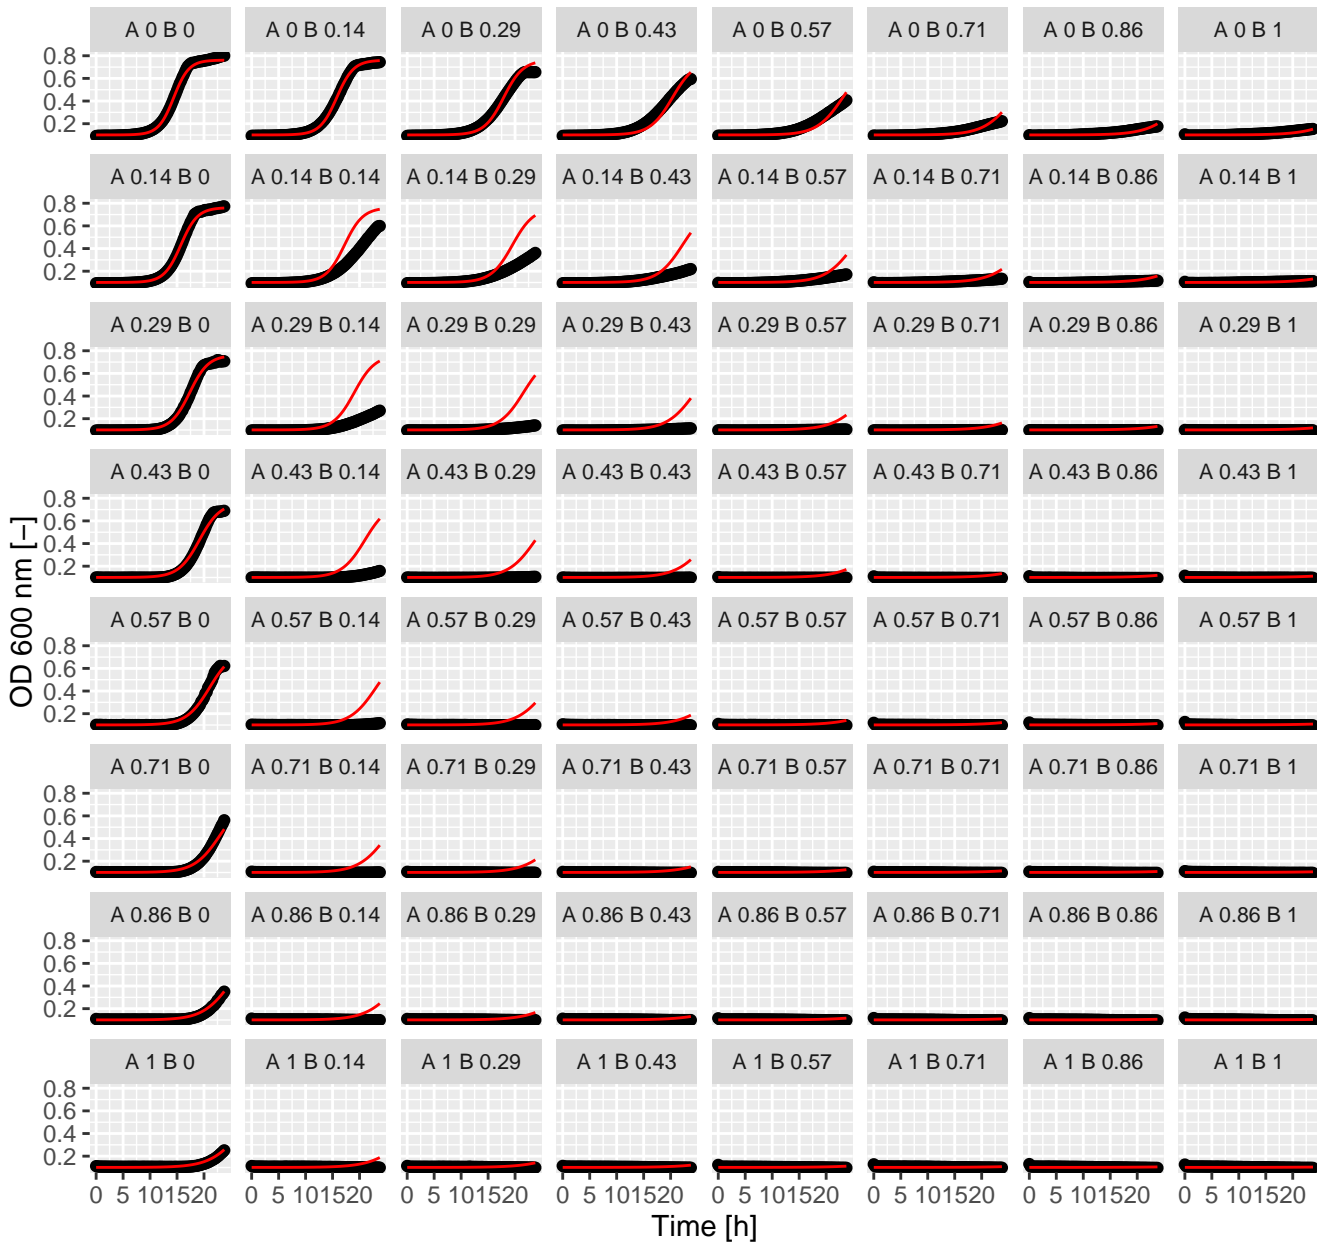

Ben.Pen (= Ax.Bx) full GPDI  
Int\_AB = -0.78 and Int\_BA = 0.52 at EC50

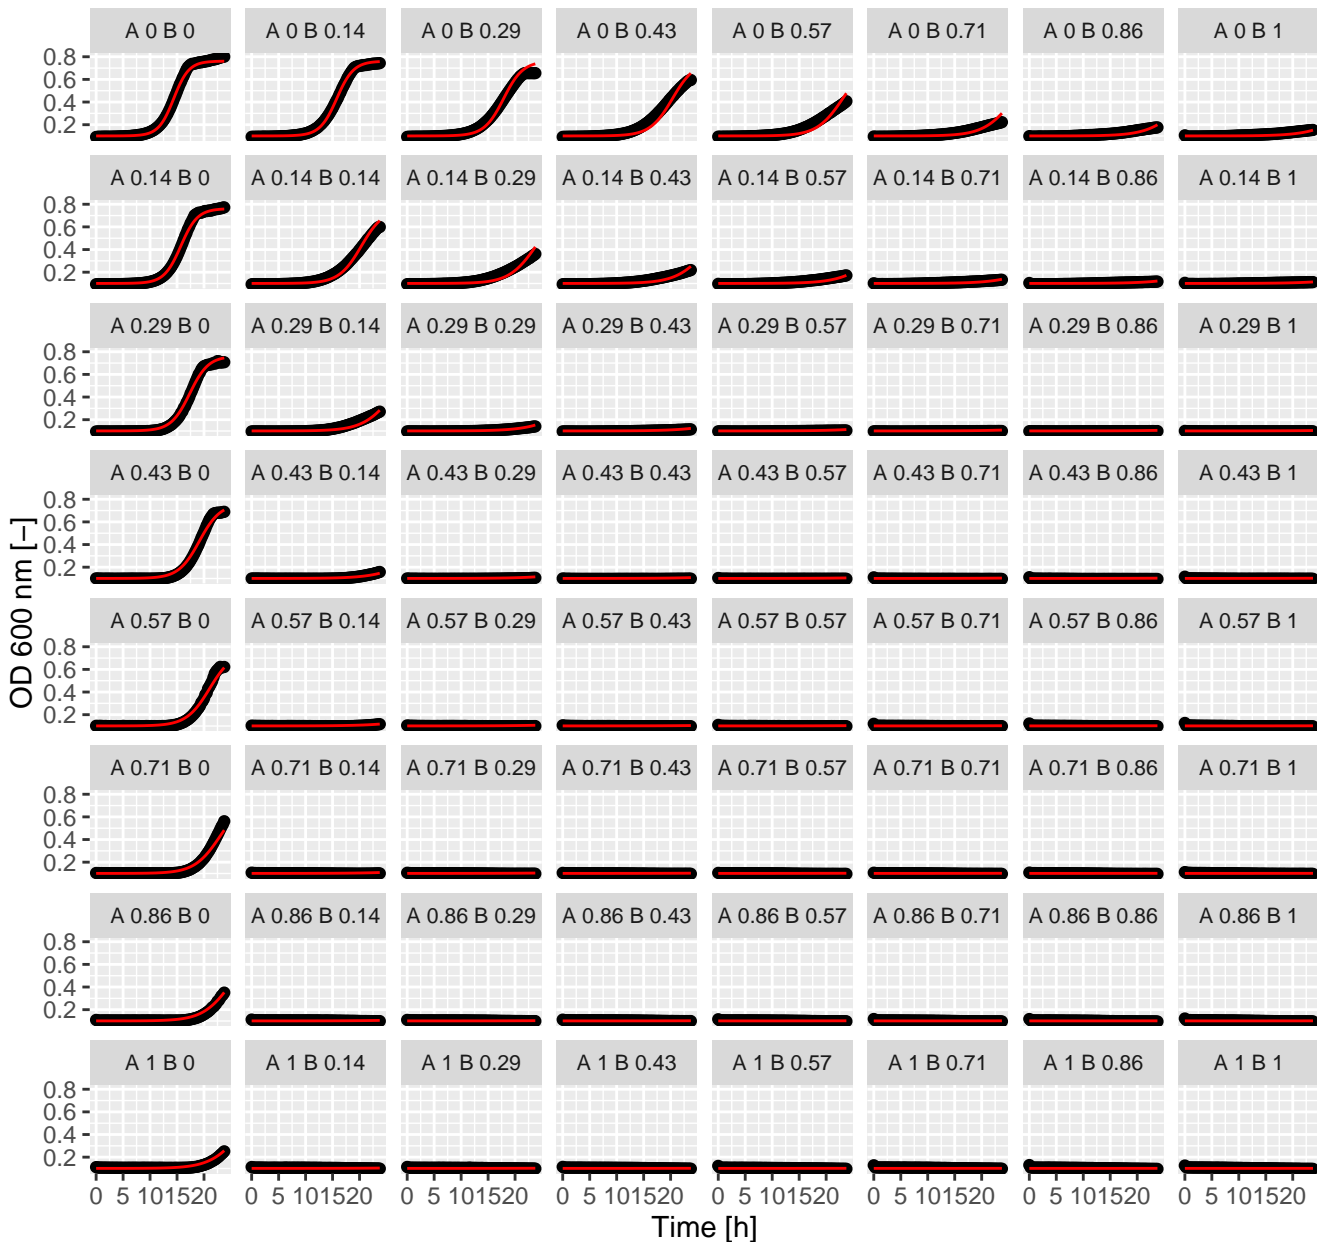

Ben. Myr (= Ax.Bx) exp. additivity (BI)  
 Int\_AB = 0 and Int\_BA = 0 at EC50

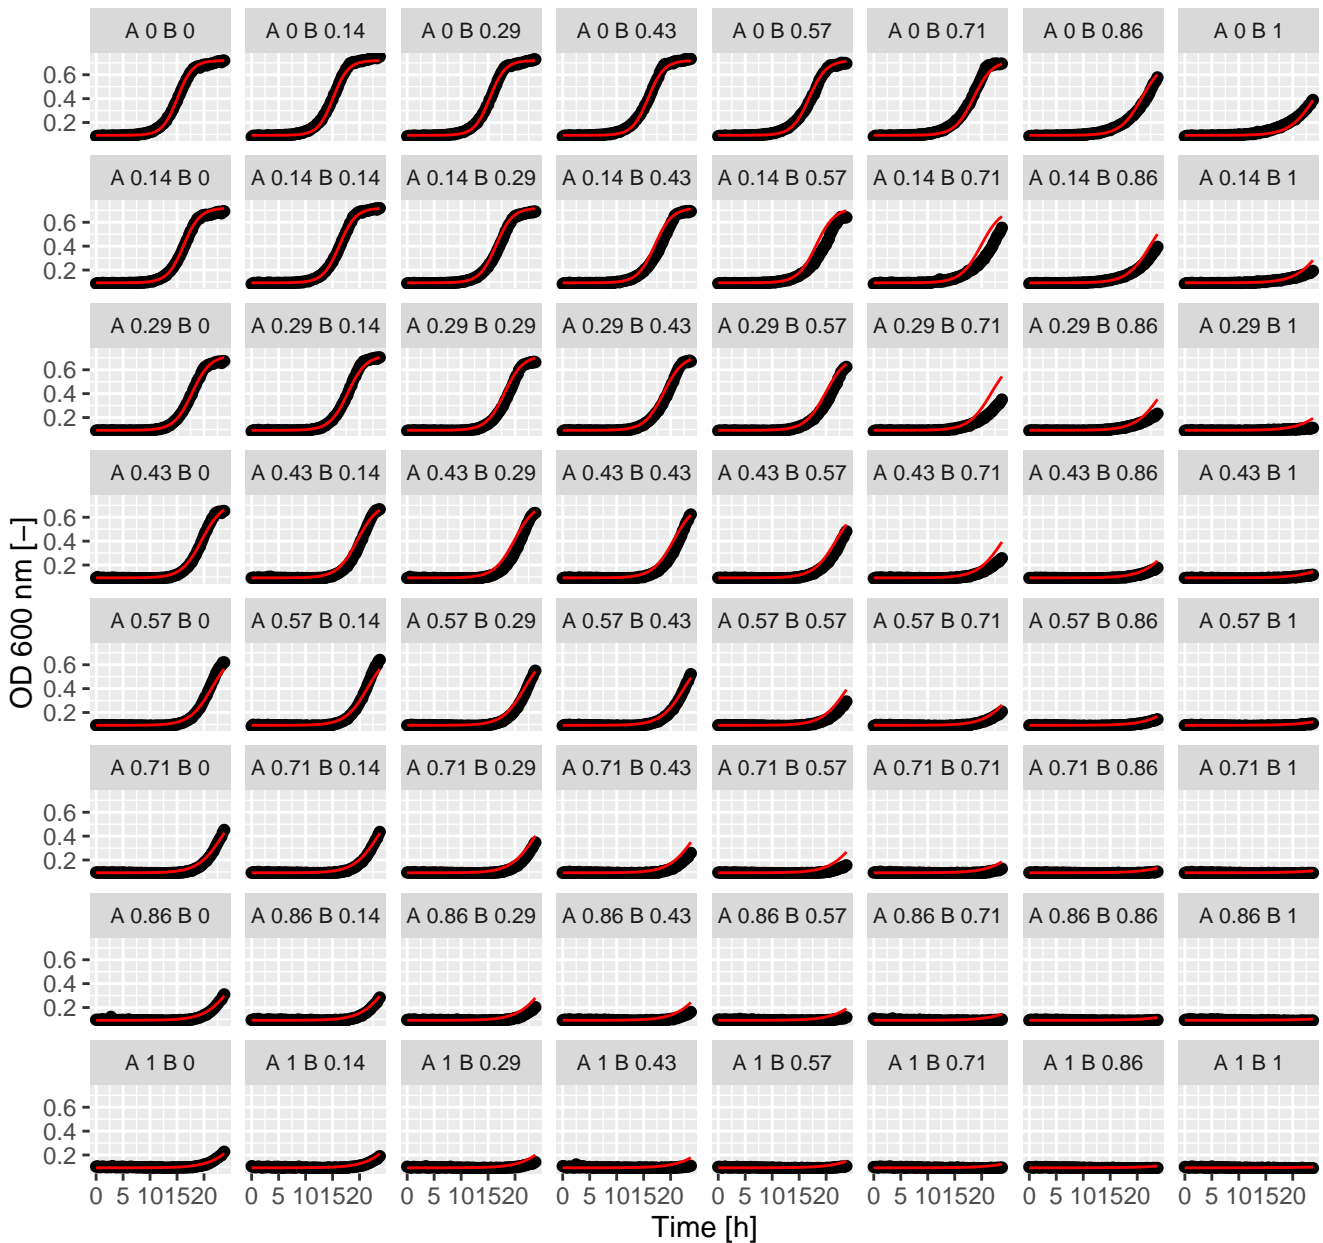

Ben. Myr (= Ax.Bx) full GPDI  
Int\_AB = -0.14 and Int\_BA = -0.1 at EC50

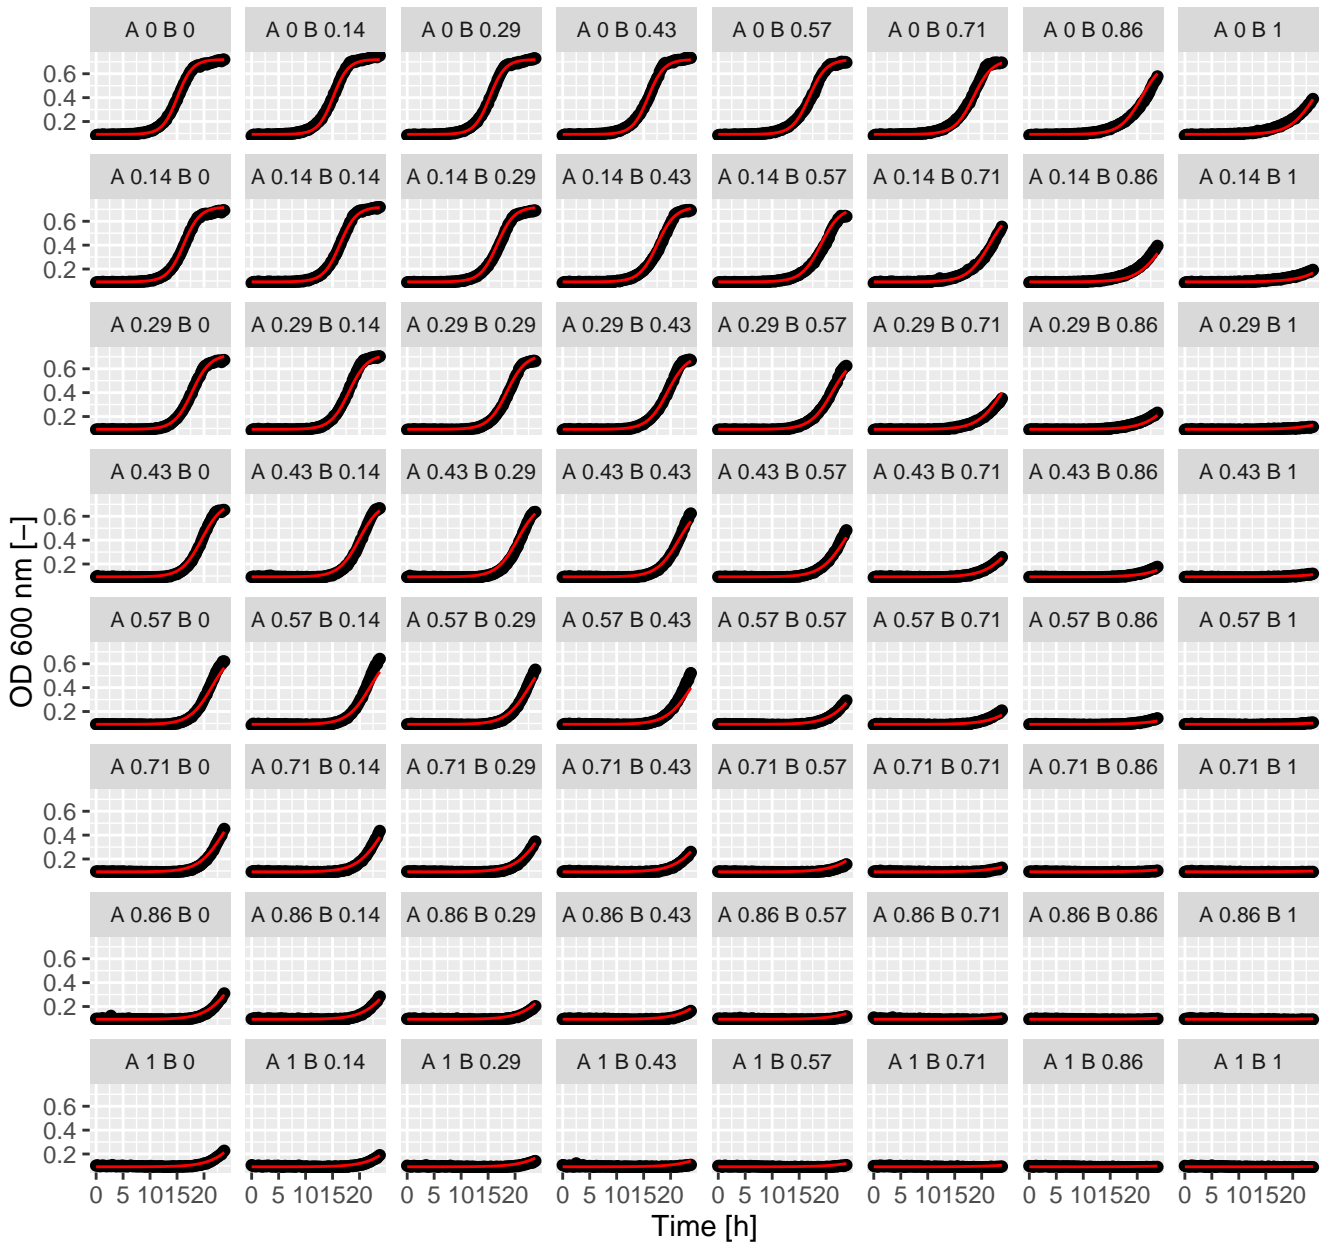

Ben.MMS (= Ax.Bx) exp. additivity (BI)  
Int\_AB = 0 and Int\_BA = 0 at EC50

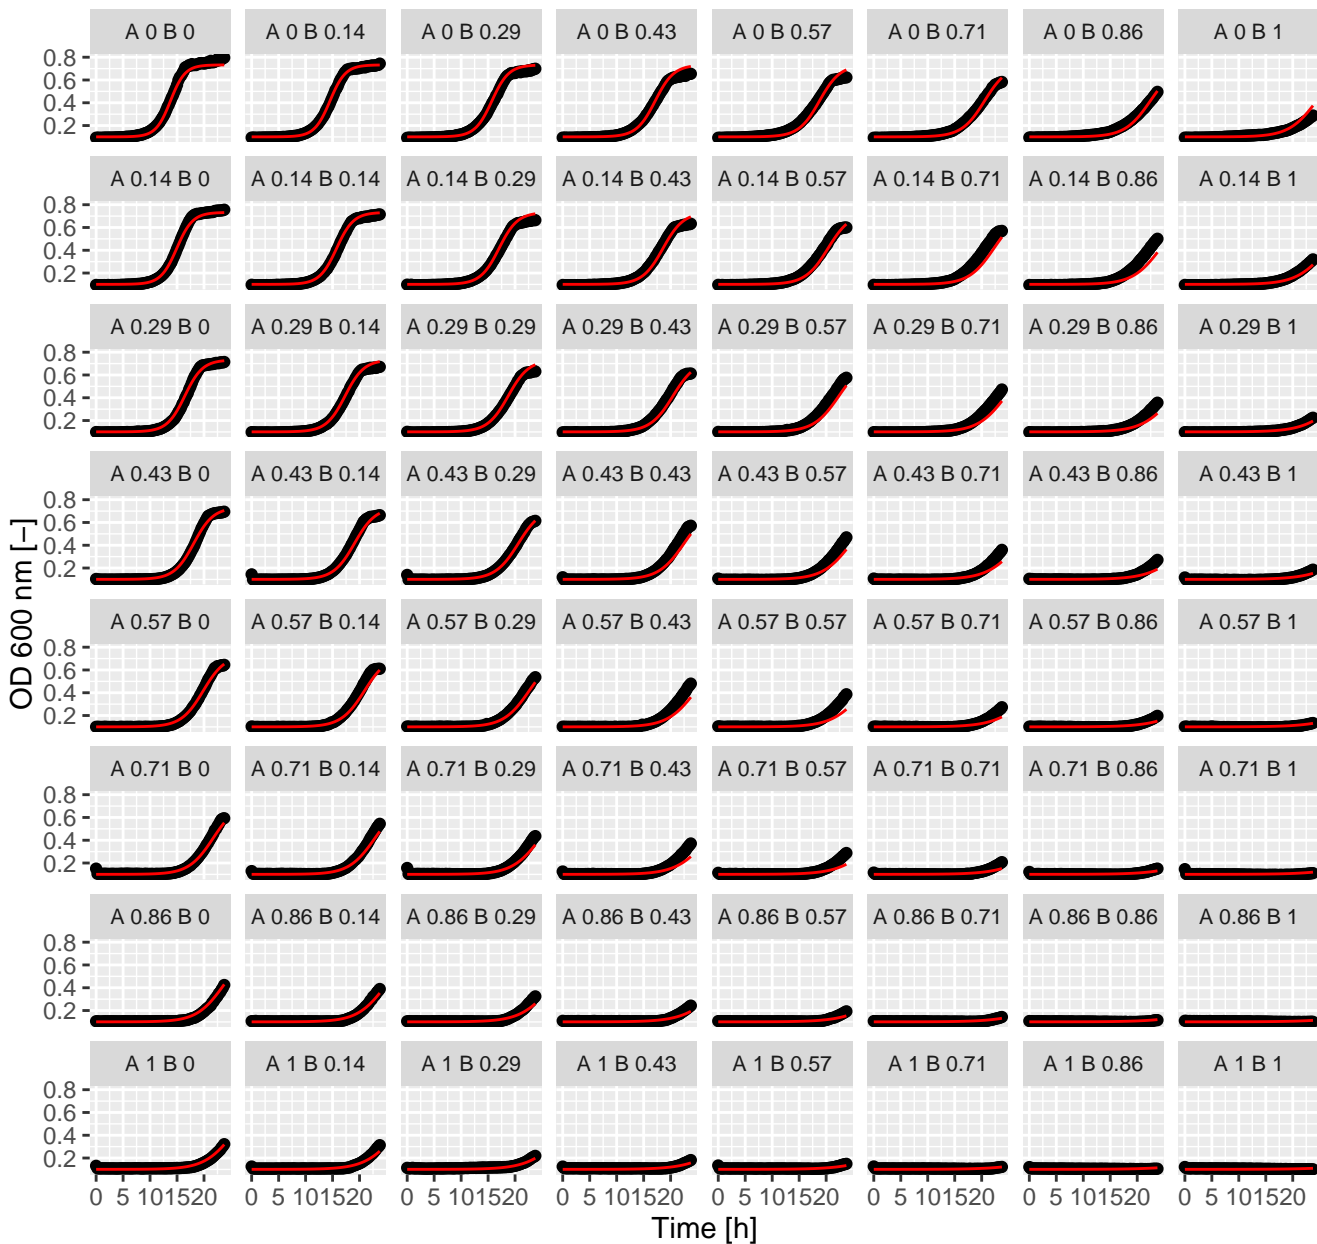

Ben.MMS (= Ax.Bx) full GPDI  
Int\_AB = 0.23 and Int\_BA = 0.09 at EC50

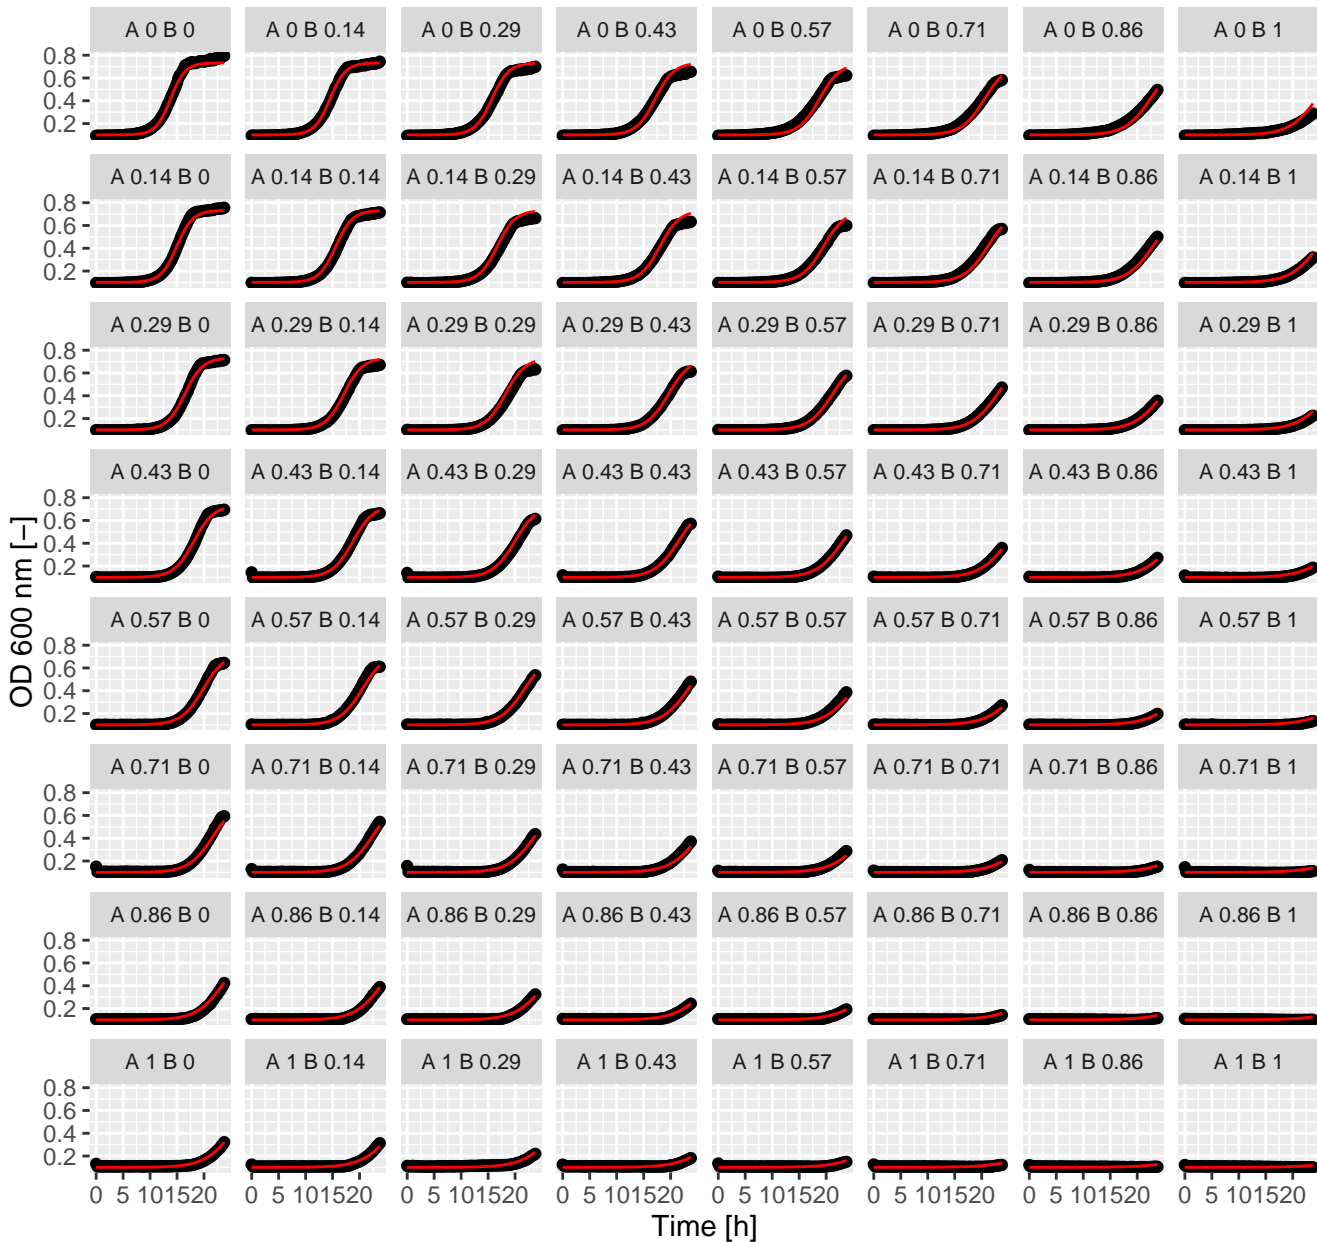

Ben.Met (= Ax.Bx) exp. additivity (BI)  
Int\_AB = 0 and Int\_BA = 0 at EC50

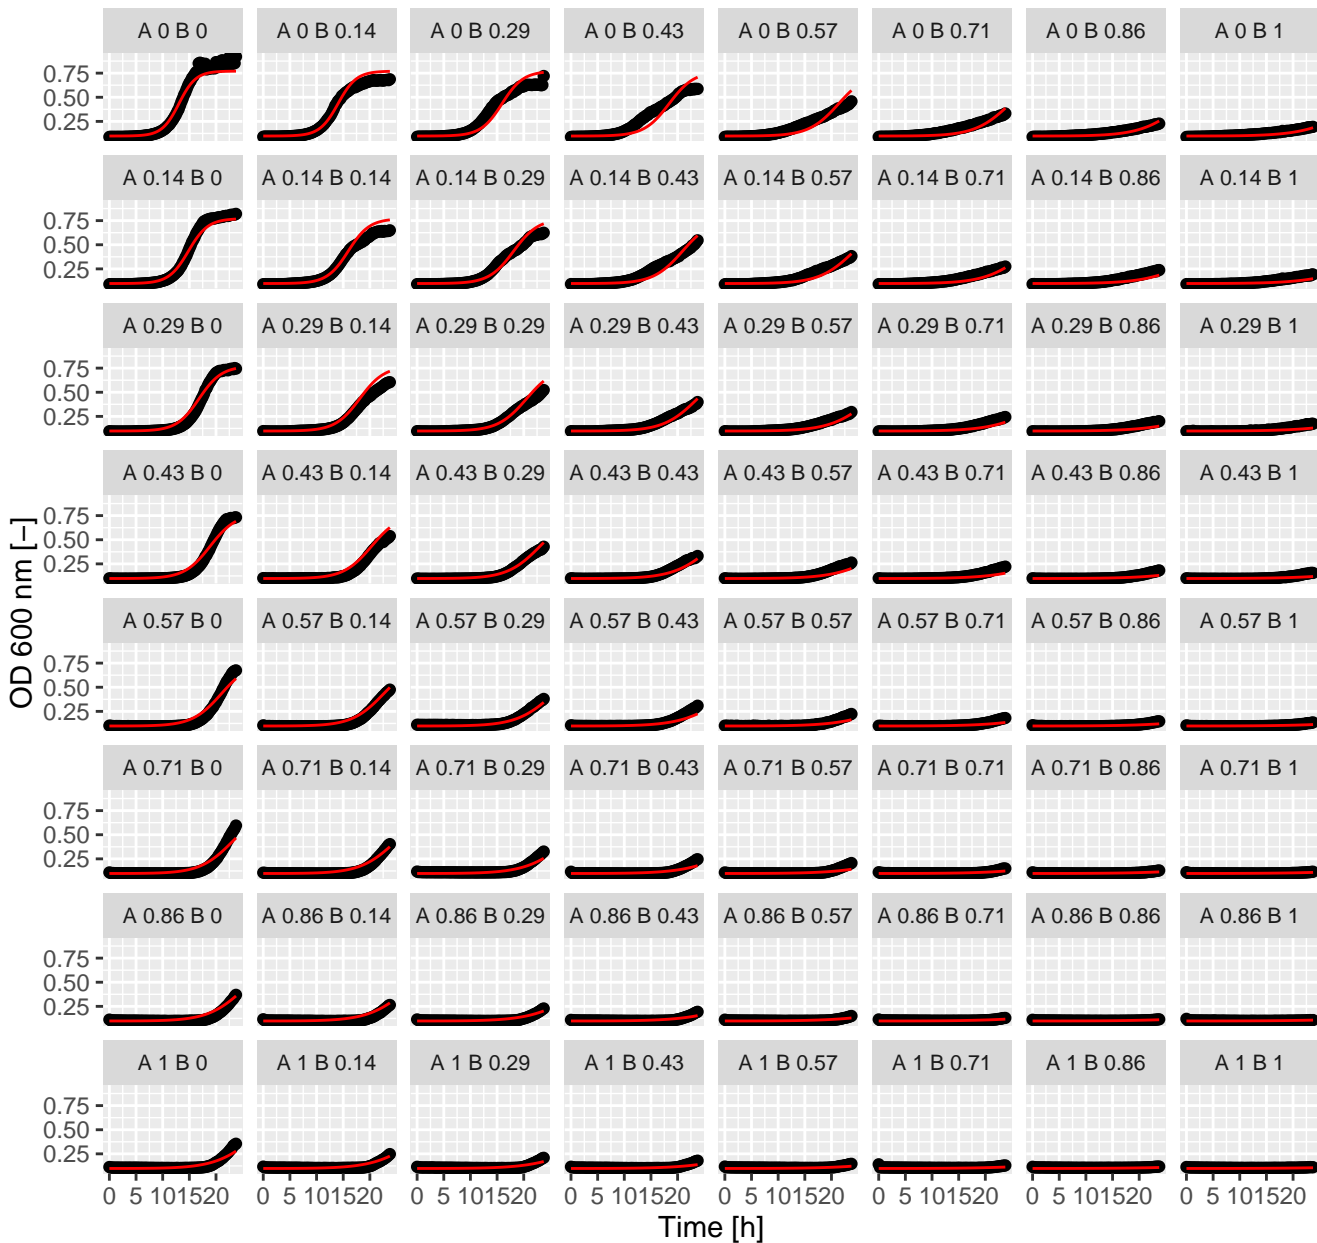

Ben.Met (= Ax.Bx) full GPDI  
Int\_AB = 0 and Int\_BA = 0.1 at EC50

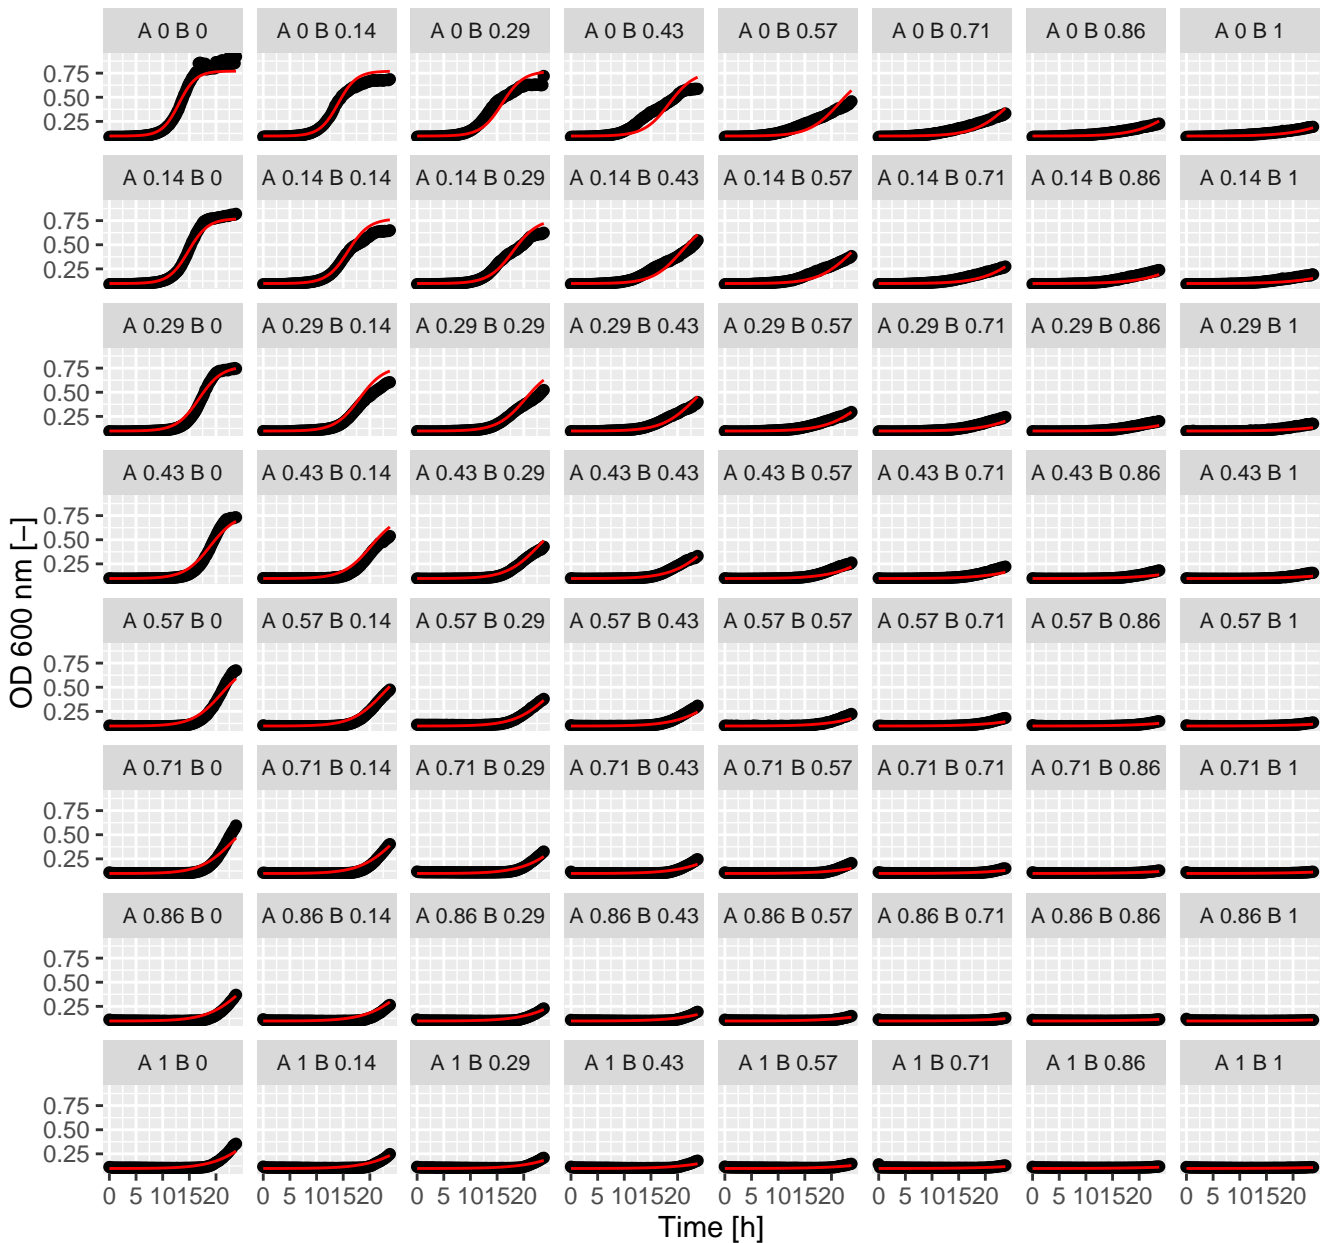



Ben.Lat (= Ax.Bx) exp. additivity (BI)  
Int\_AB = 0 and Int\_BA = 0 at EC50

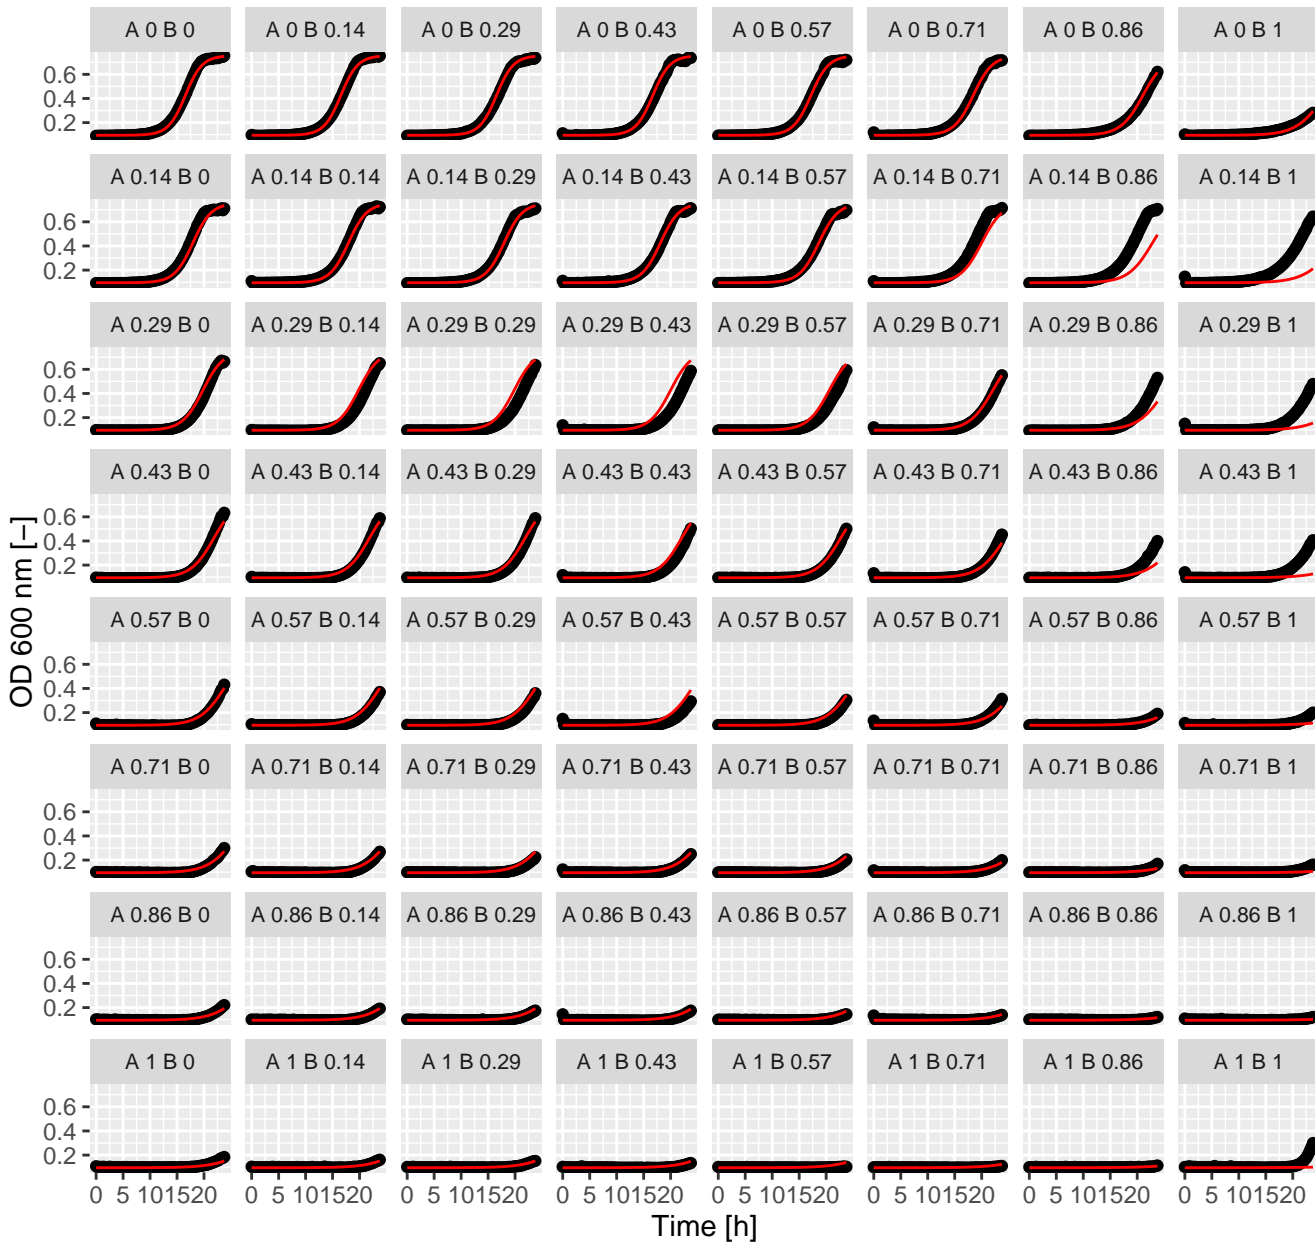

Ben.Lat (= Ax.Bx) full GPDI  
Int\_AB = -0.29 and Int\_BA = 0.71 at EC50

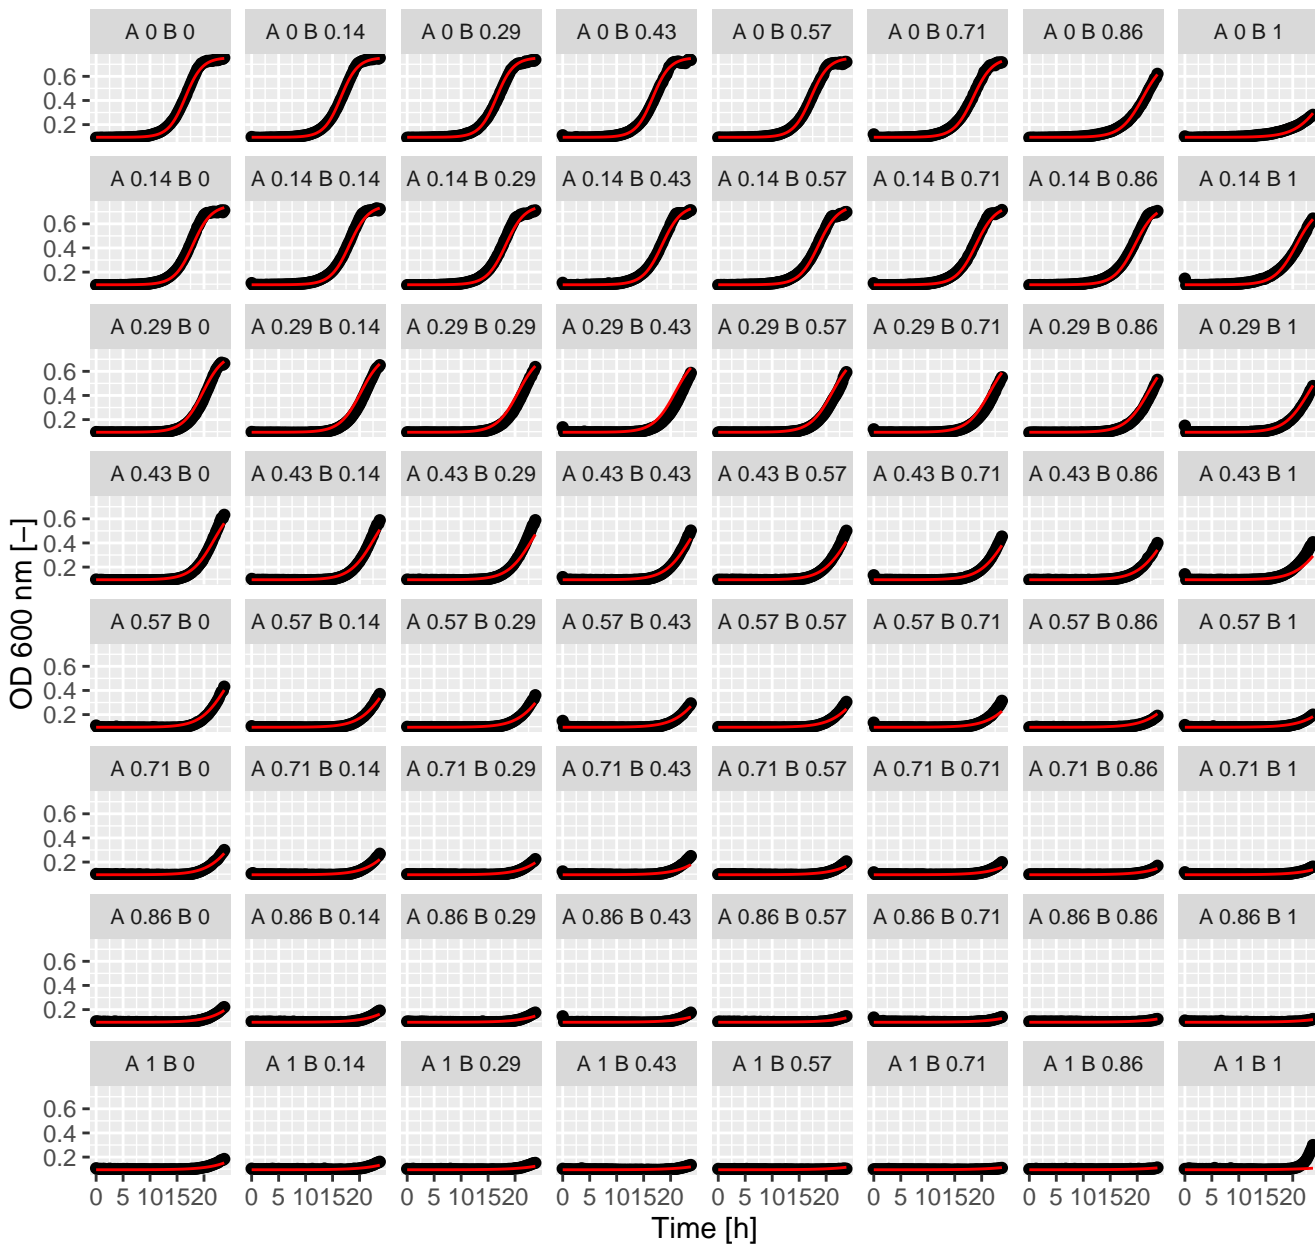

Ben.Hal (= Ax.Bx) exp. additivity (BI)  
Int\_AB = 0 and Int\_BA = 0 at EC50

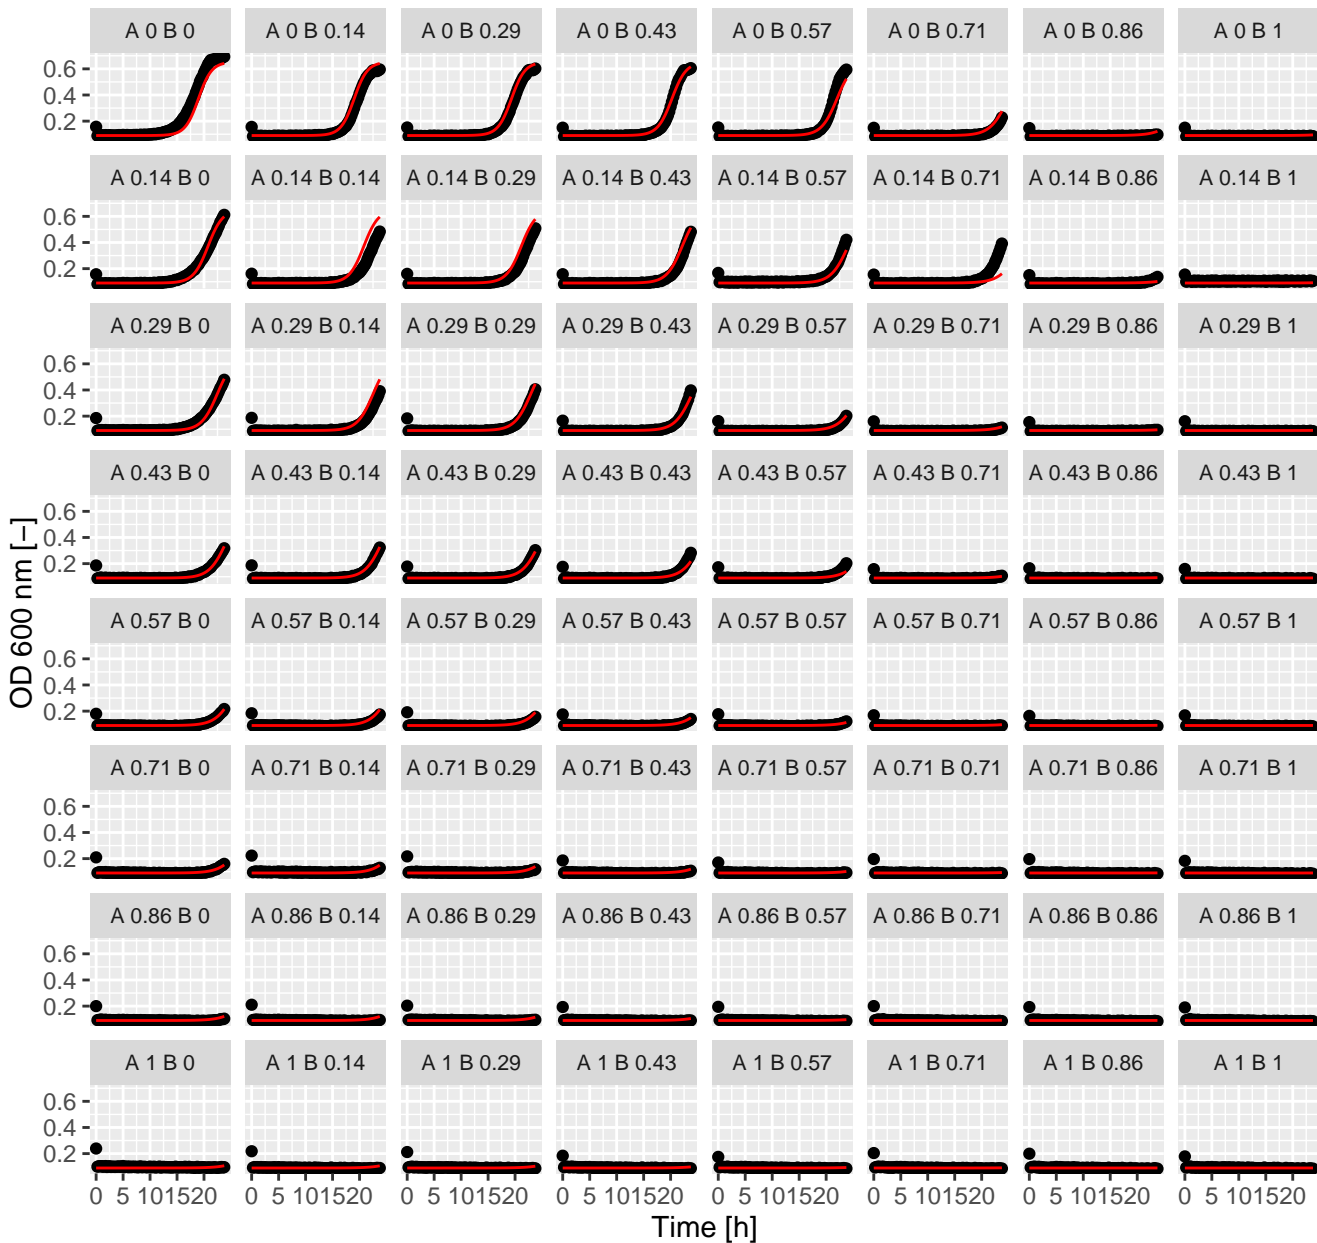

Ben.Hal (= Ax.Bx) full GPDI  
Int\_AB = -0.28 and Int\_BA = 0.35 at EC50

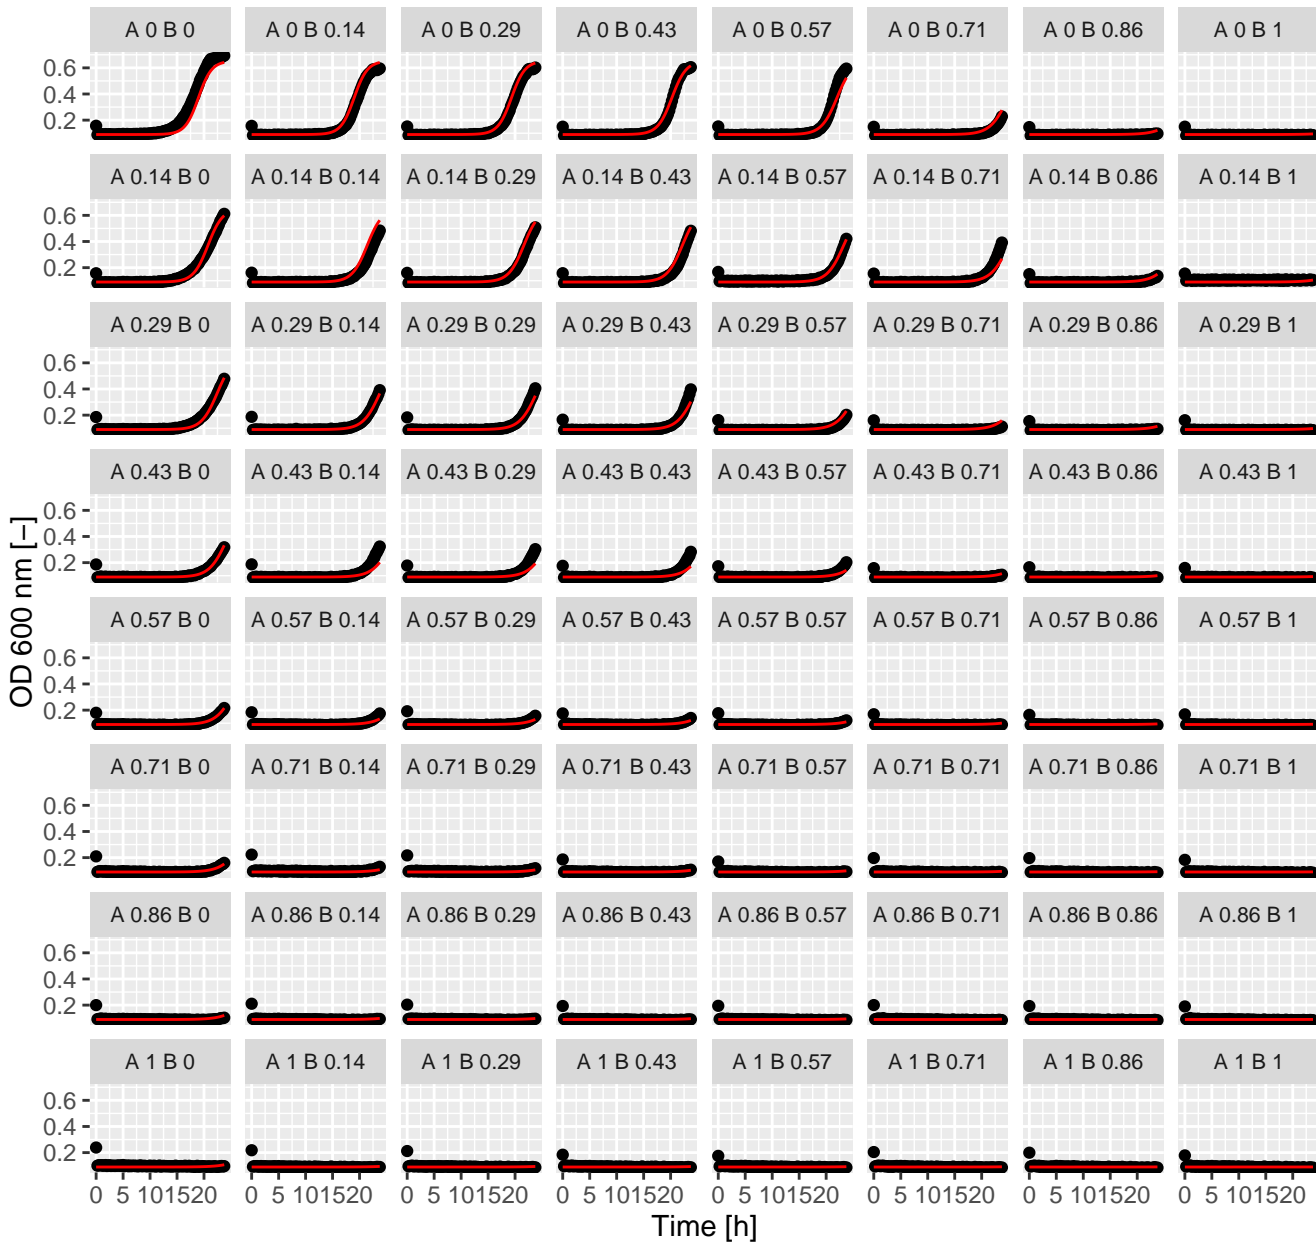

Ben.Fen (= Ax.Bx) exp. additivity (BI)  
Int\_AB = 0 and Int\_BA = 0 at EC50

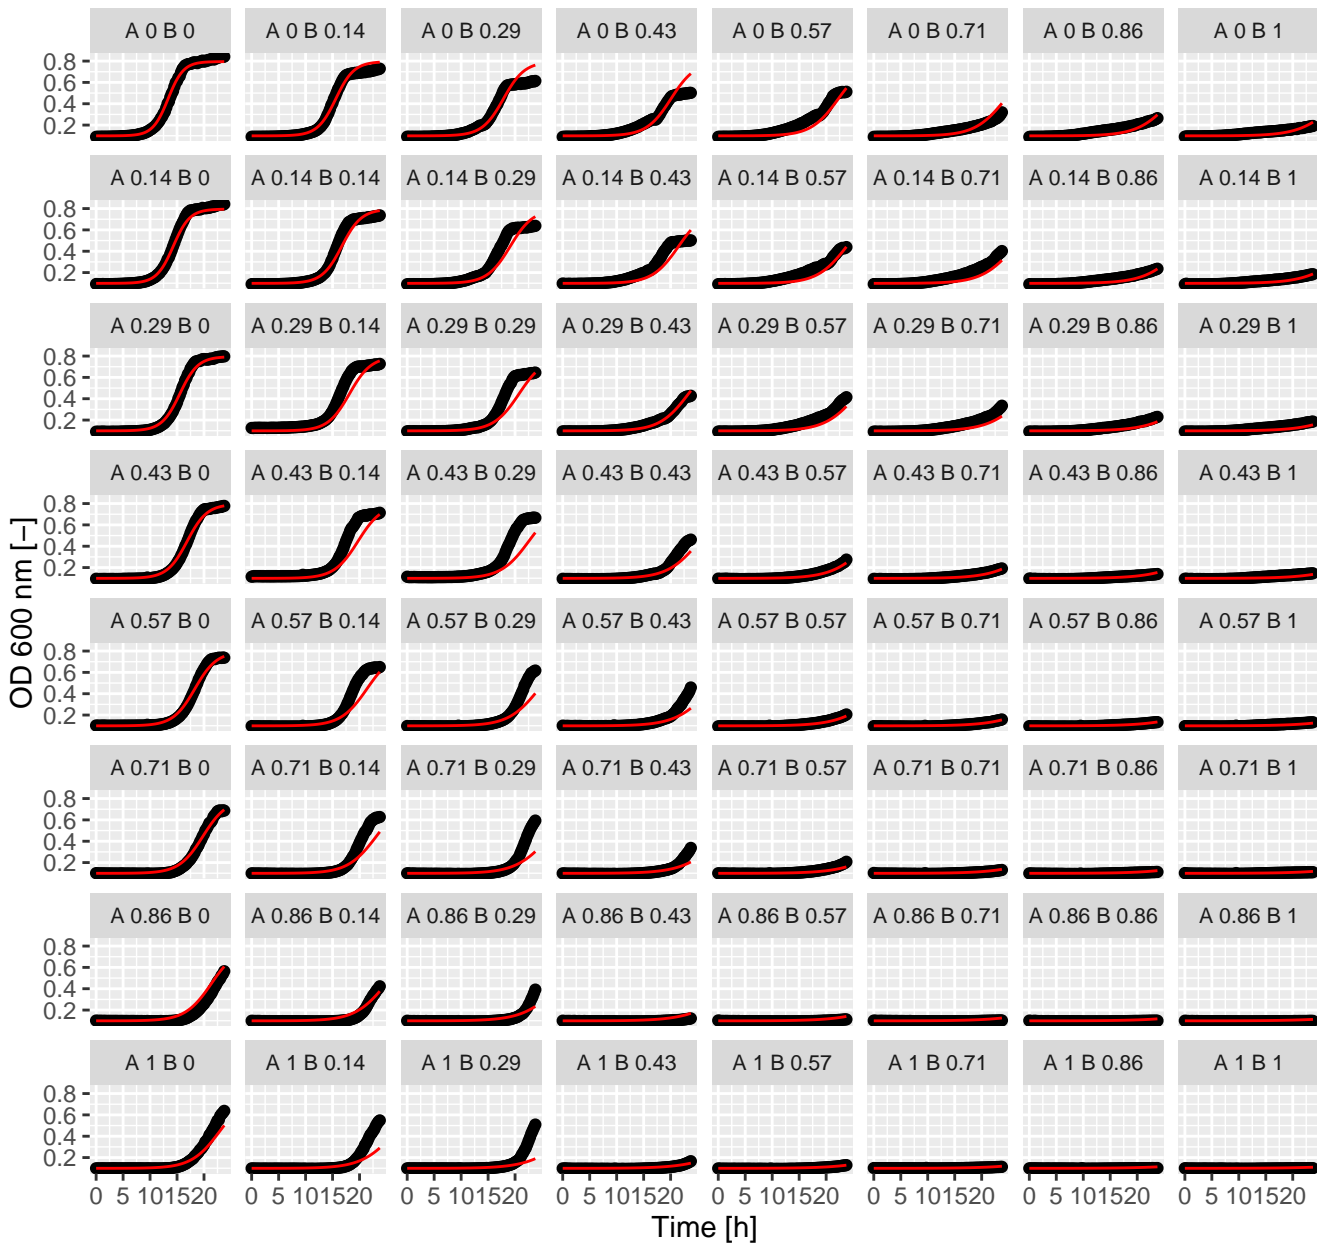

Ben.Fen (= Ax.Bx) full GPDI  
Int\_AB = 0.26 and Int\_BA = 0.13 at EC50

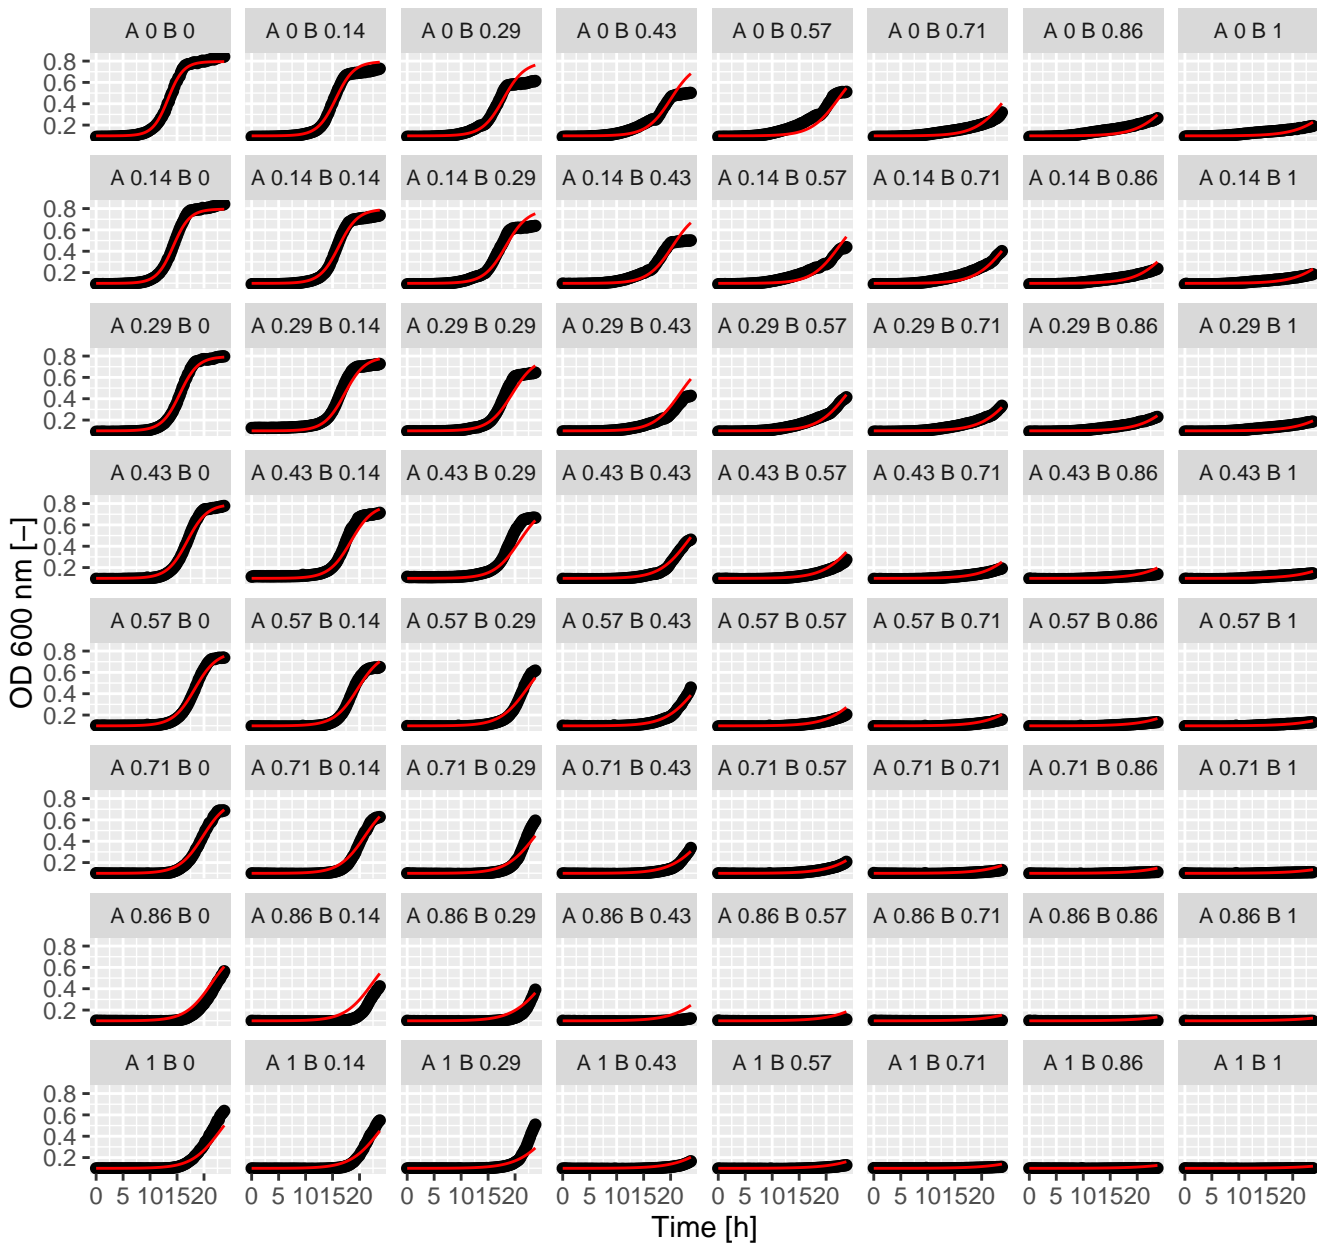

Ben.Dyc (= Ax.Bx) exp. additivity (BI)  
Int\_AB = 0 and Int\_BA = 0 at EC50

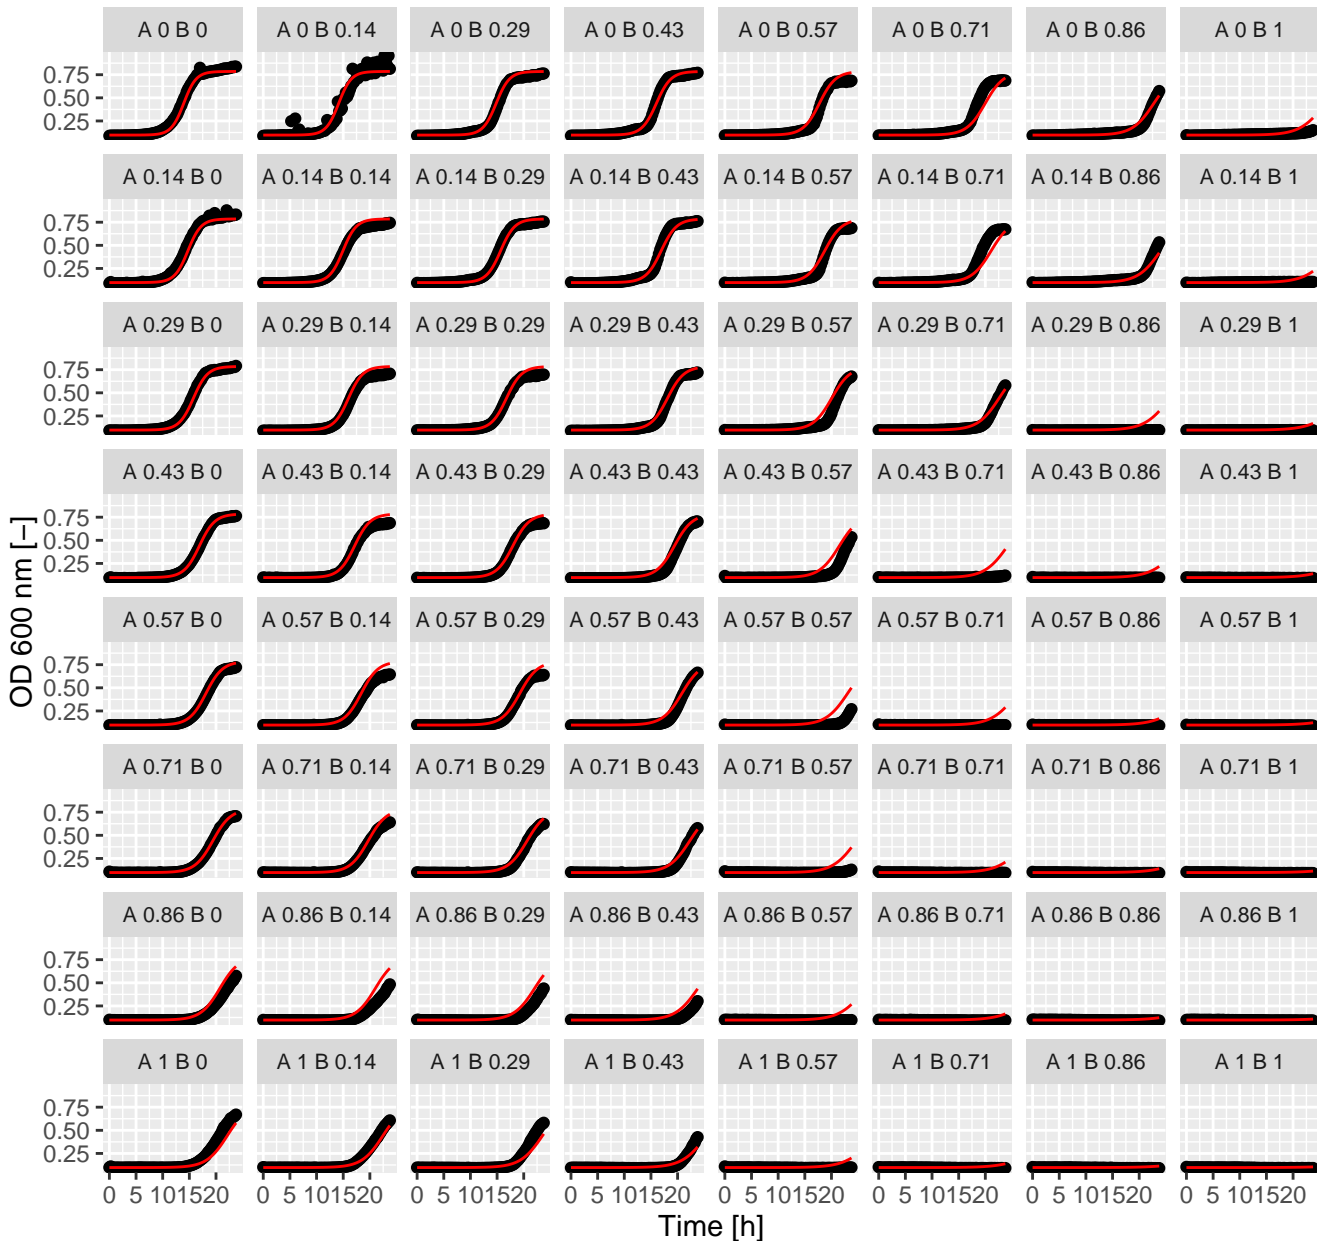

Ben.Dyc (= Ax.Bx) full GPDI  
Int\_AB = -0.17 and Int\_BA = -0.19 at EC50

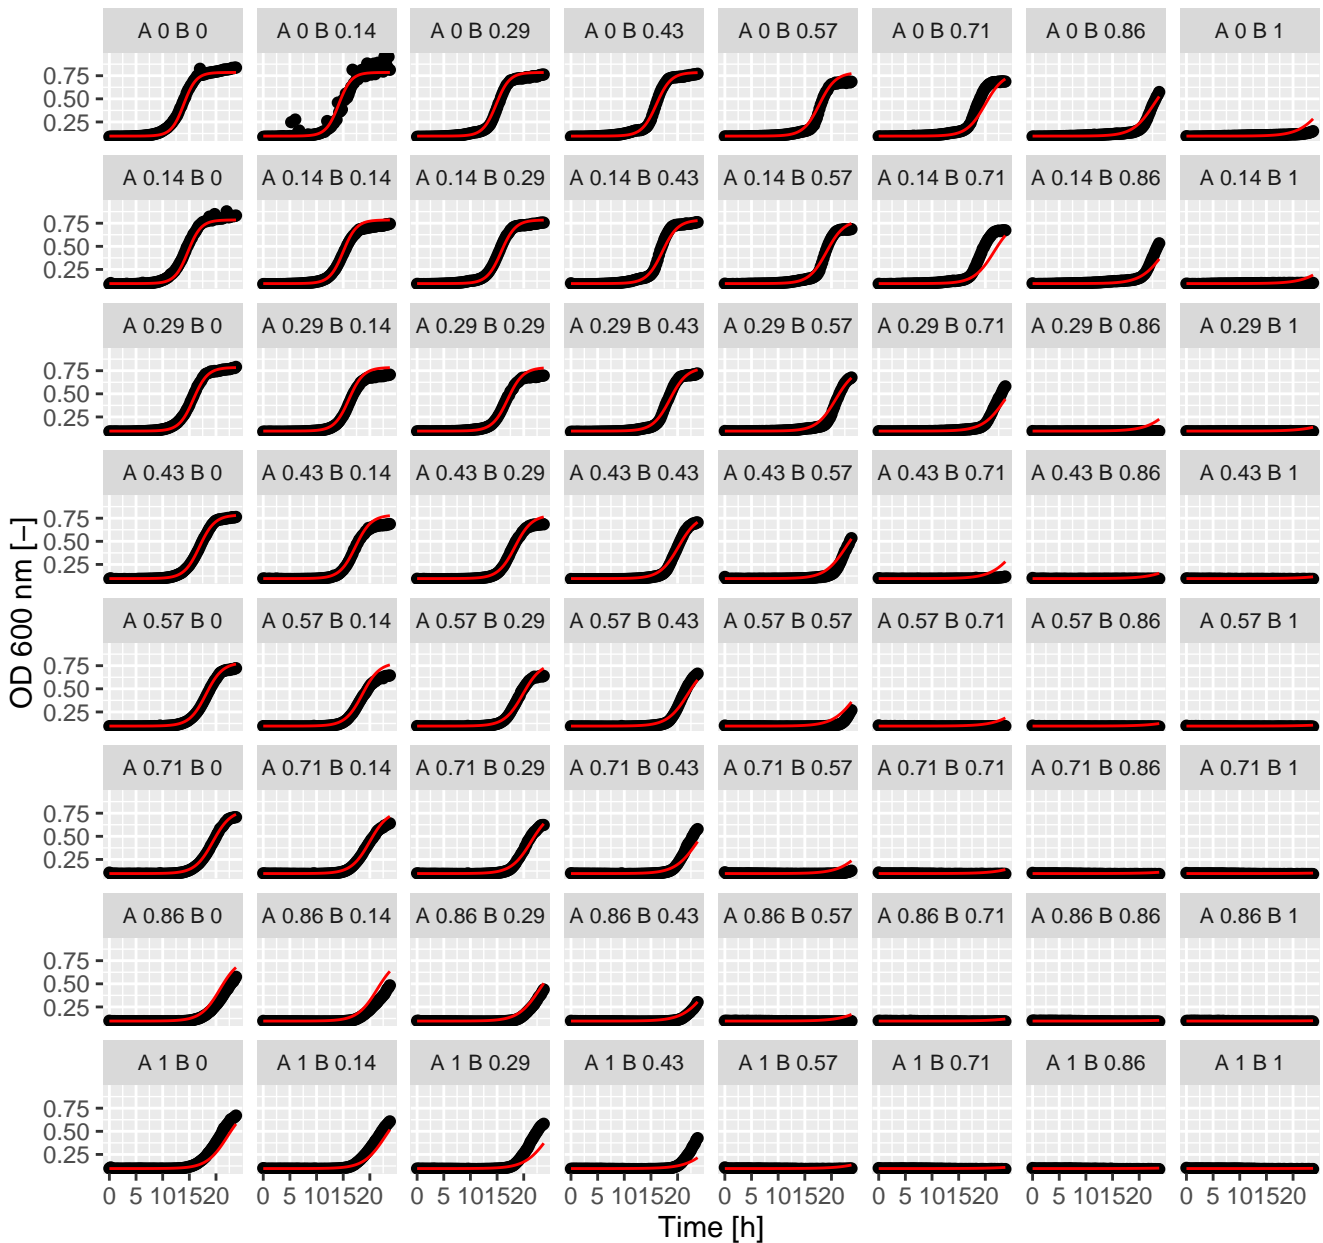



Ben.Cyc (= Ax.Bx) exp. additivity (BI)  
Int\_AB = 0 and Int\_BA = 0 at EC50

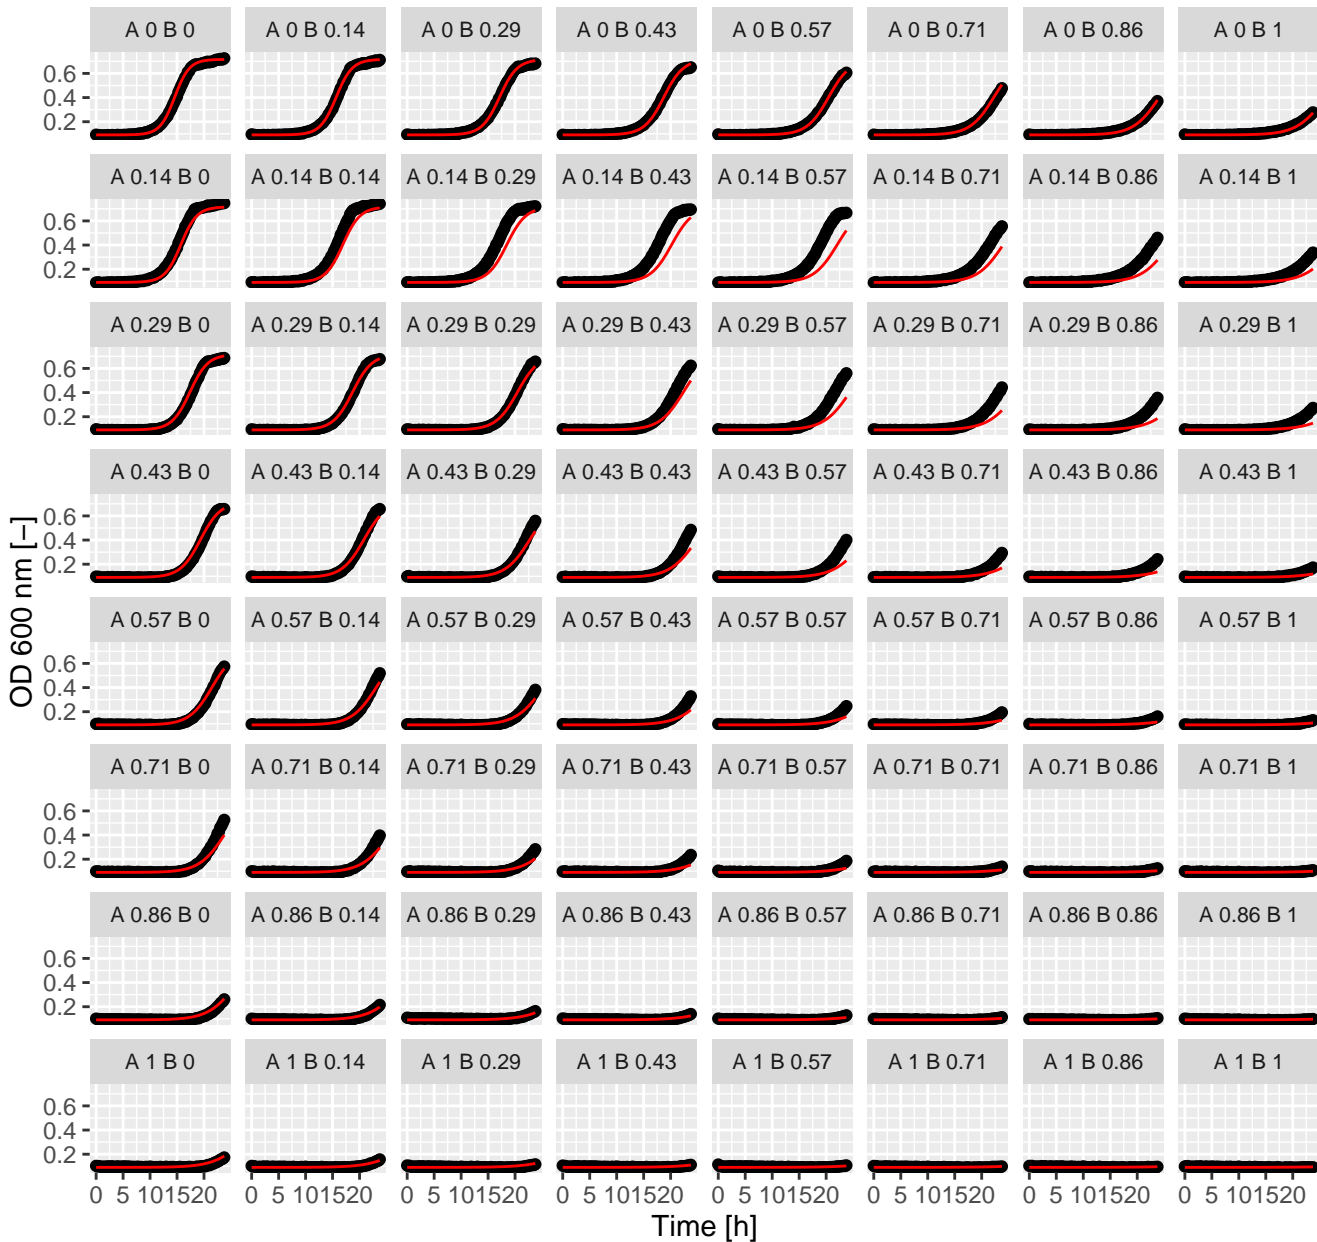

Ben.Cyc (= Ax.Bx) full GPDI  
Int\_AB = -0.04 and Int\_BA = 0.5 at EC50

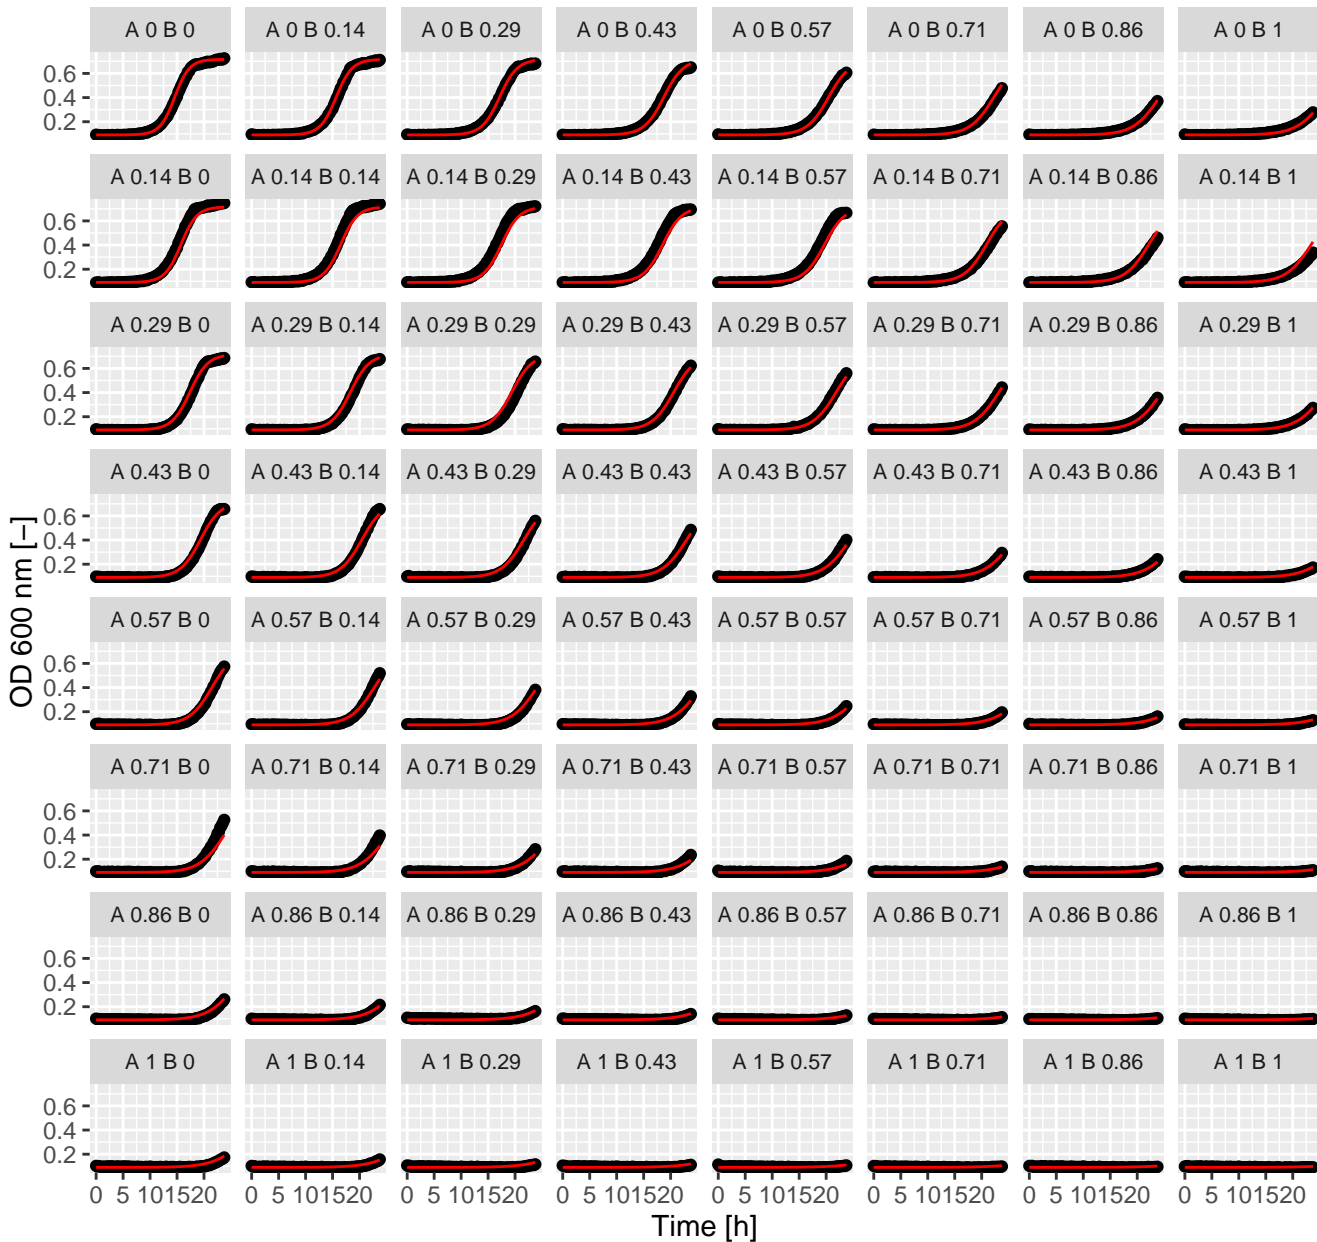

Ben.Cis (= Ax.Bx) exp. additivity (BI)  
Int\_AB = 0 and Int\_BA = 0 at EC50

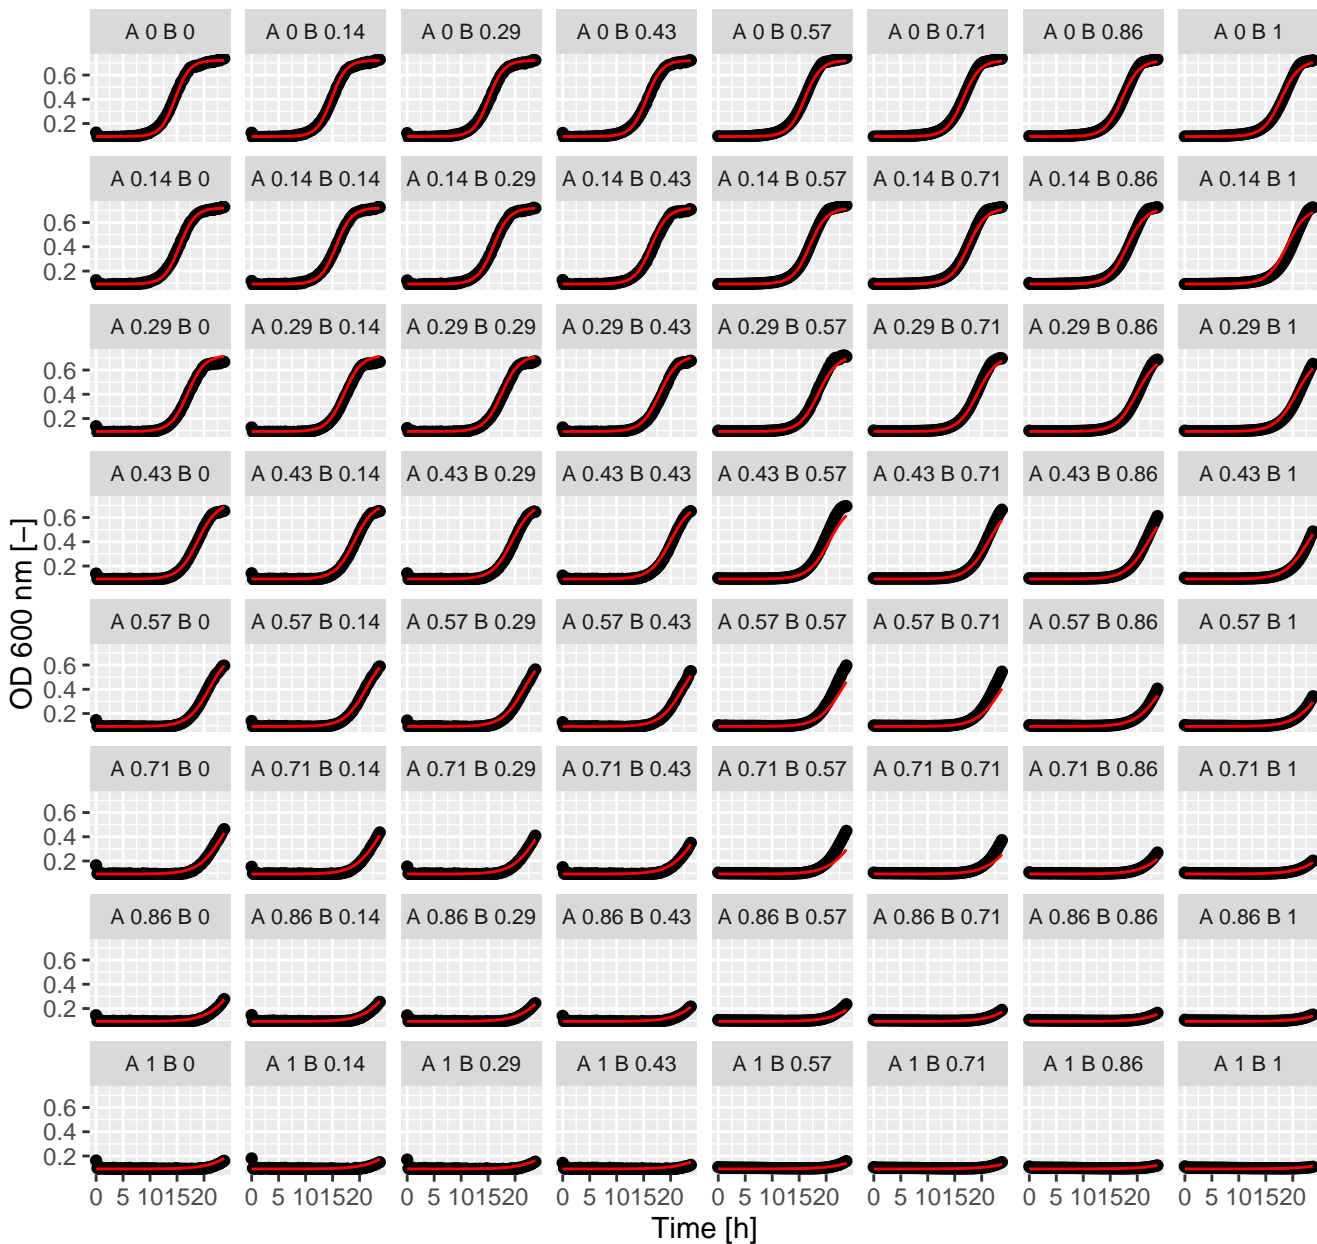

Ben.Cis (= Ax.Bx) full GPDI  
Int\_AB = 0.31 and Int\_BA = -0.08 at EC50

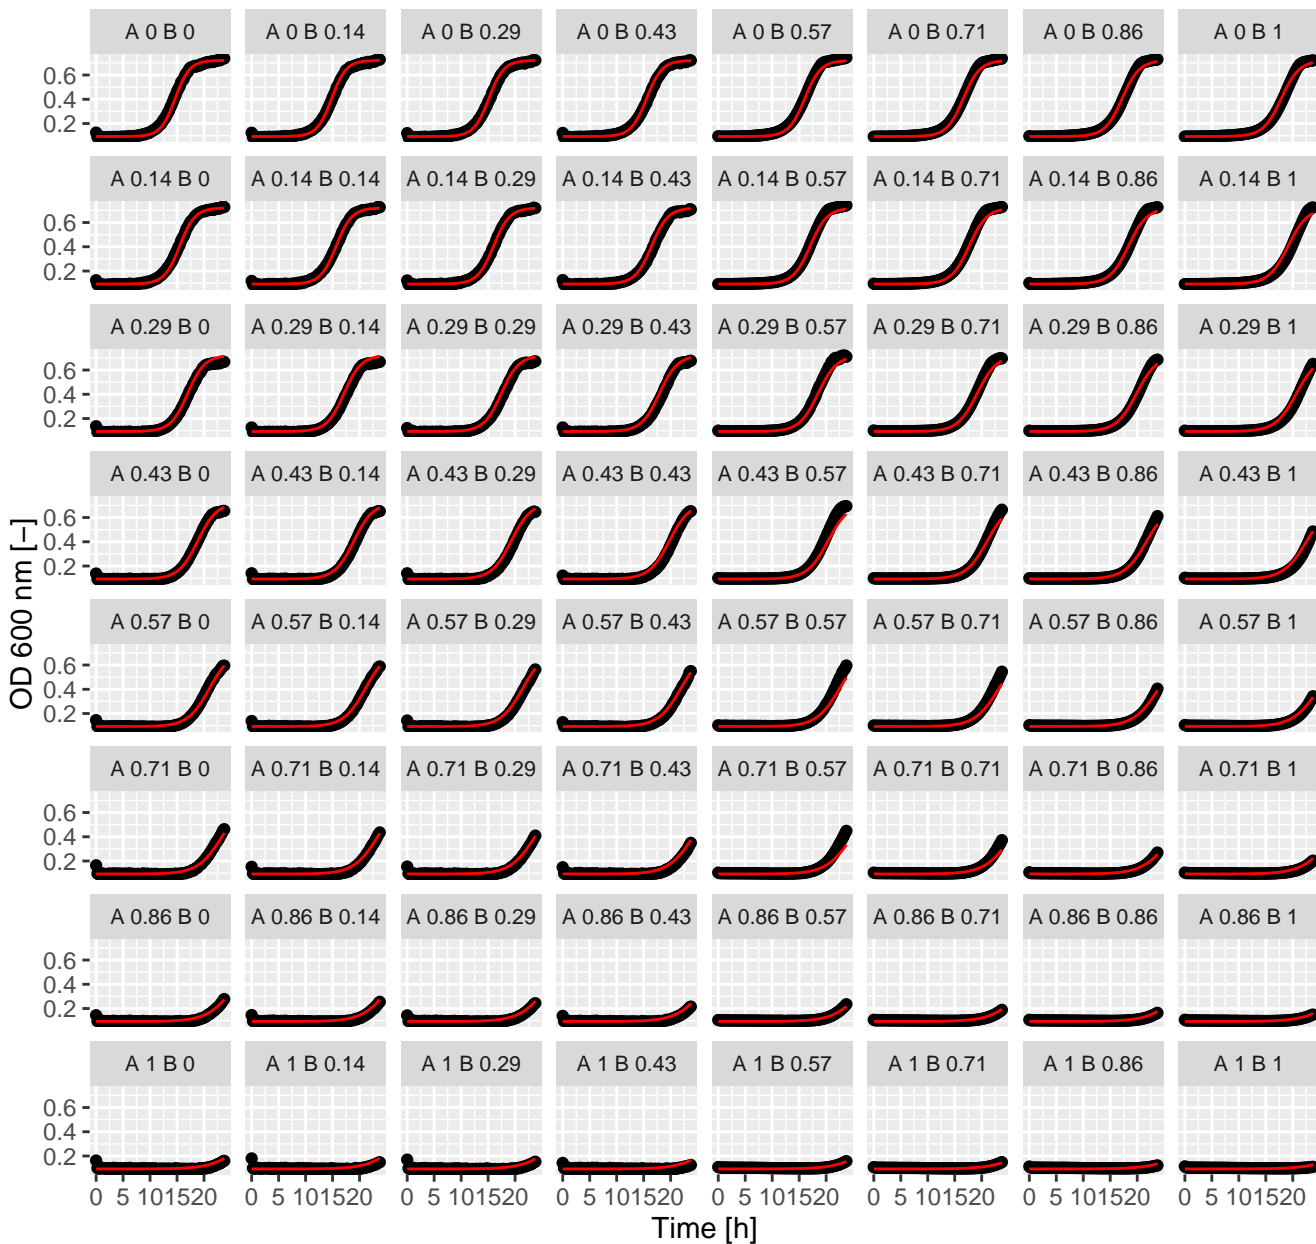

Ben.Chl (= Ax.Bx) exp. additivity (BI)  
Int\_AB = 0 and Int\_BA = 0 at EC50

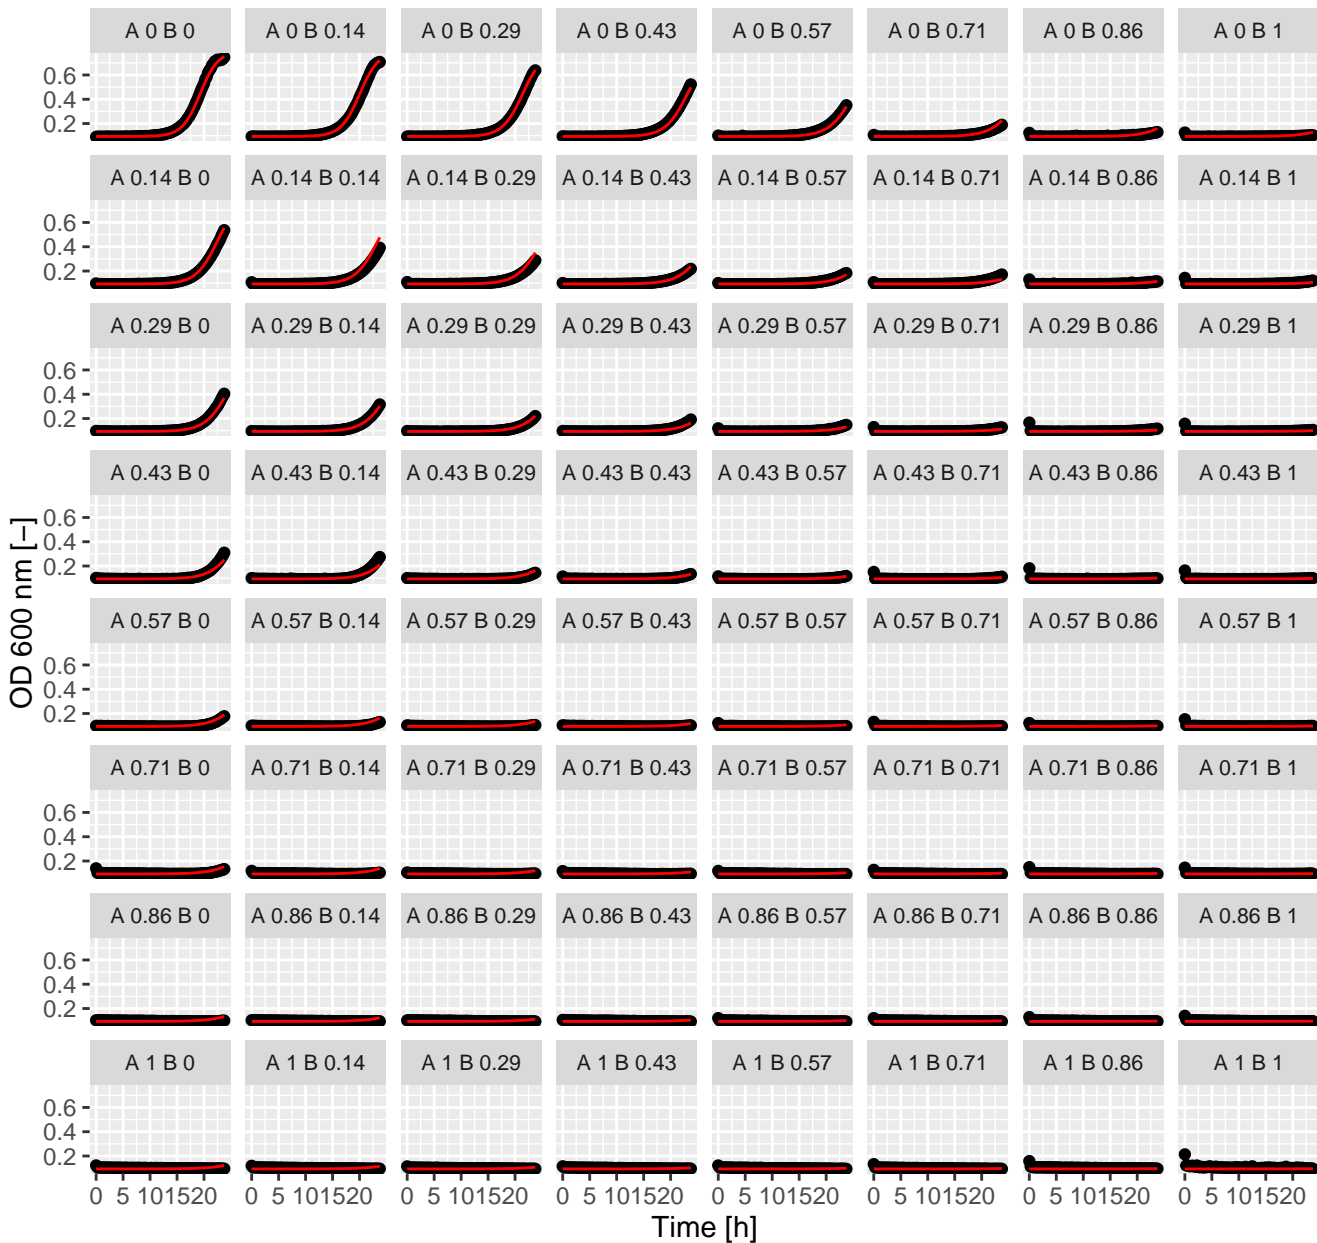

Ben.Chl (= Ax.Bx) full GPDI  
Int\_AB = -0.59 and Int\_BA = 4.31 at EC50

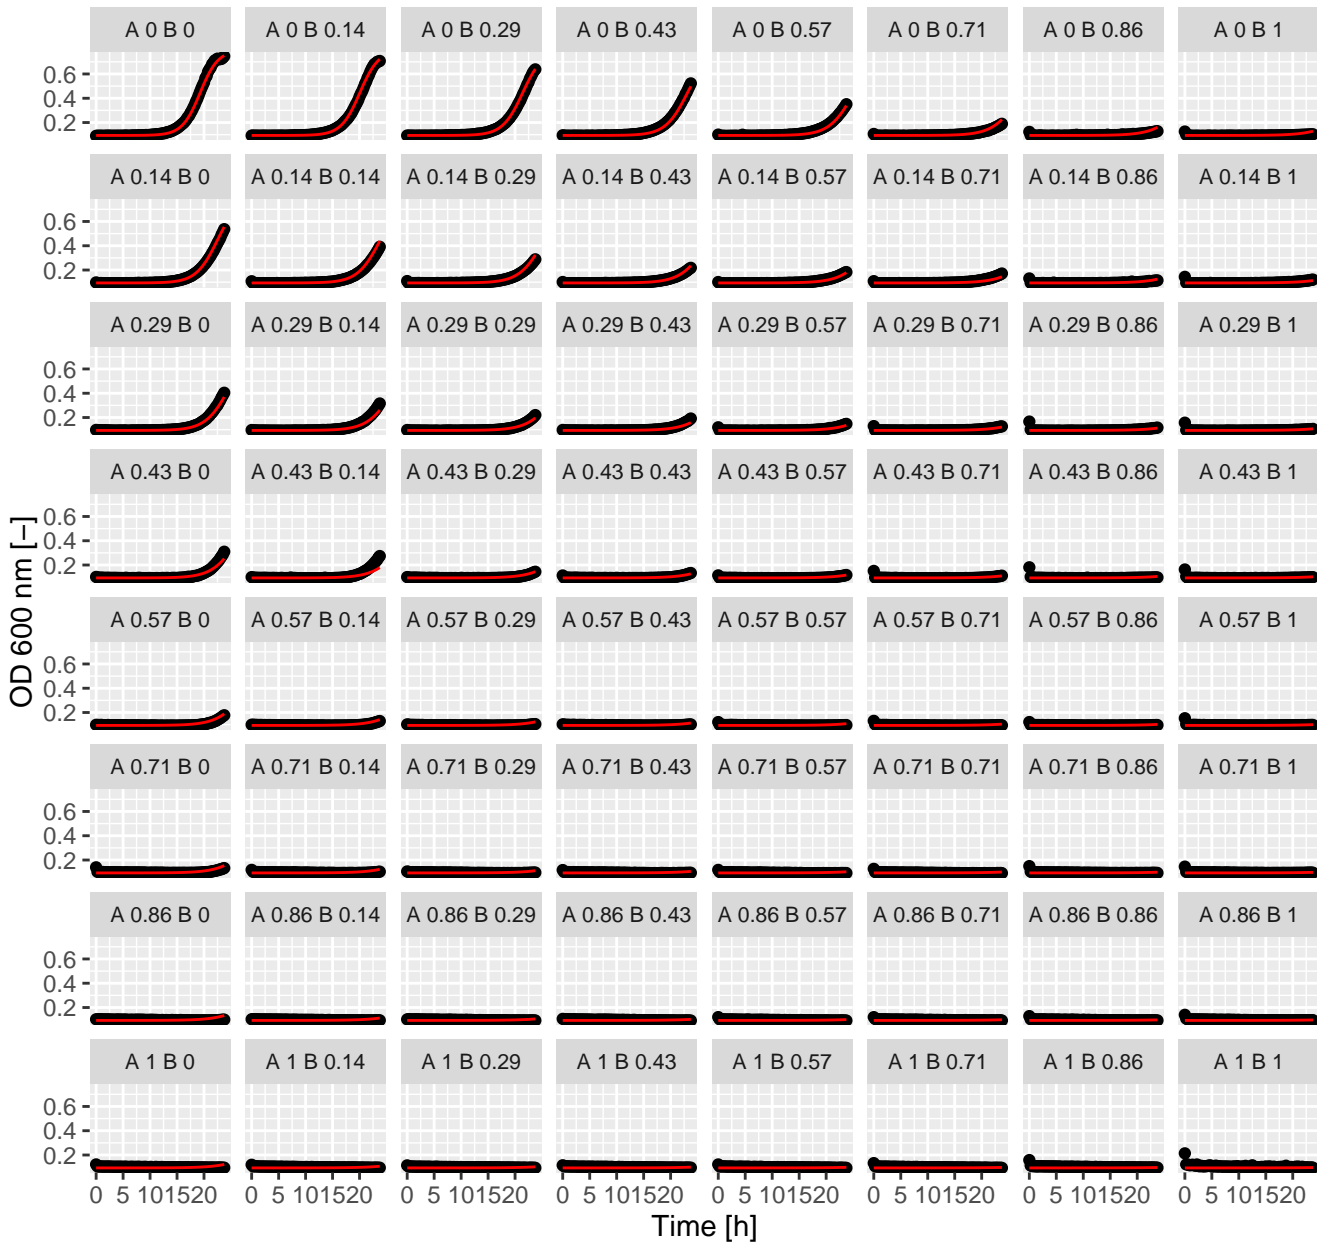

Ben.Cal (= Ax.Bx) exp. additivity (BI)  
Int\_AB = 0 and Int\_BA = 0 at EC50

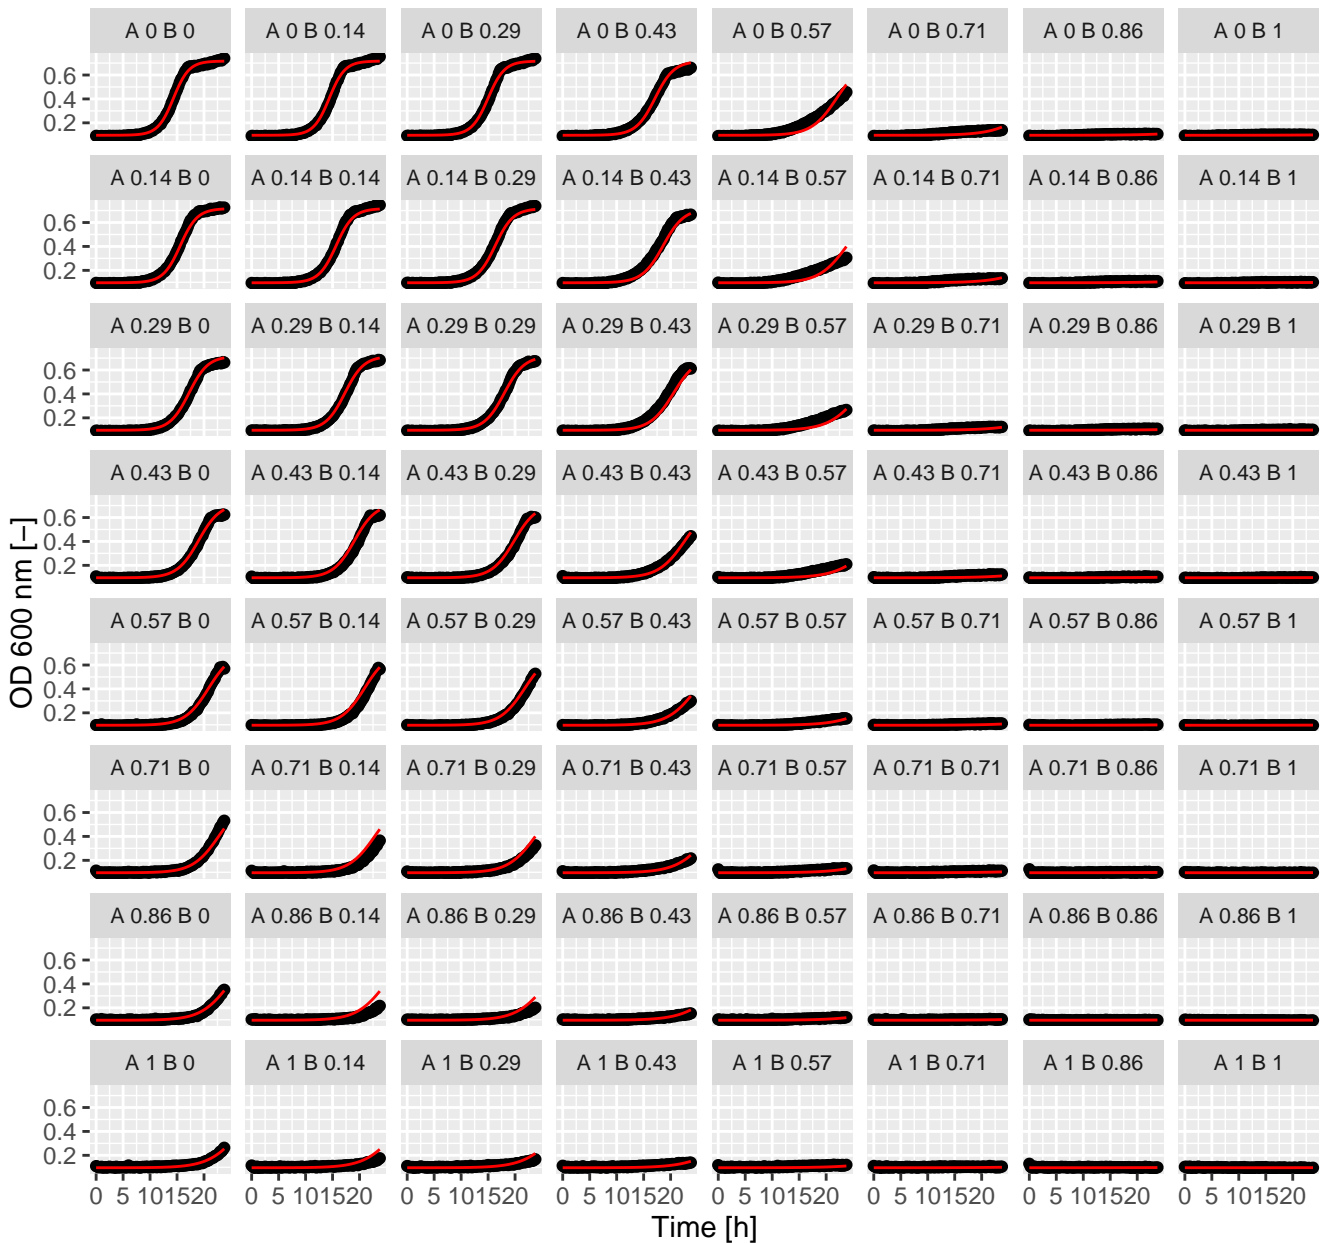

Ben.Cal (= Ax.Bx) full GPDI  
Int\_AB = -0.1 and Int\_BA = 0.12 at EC50

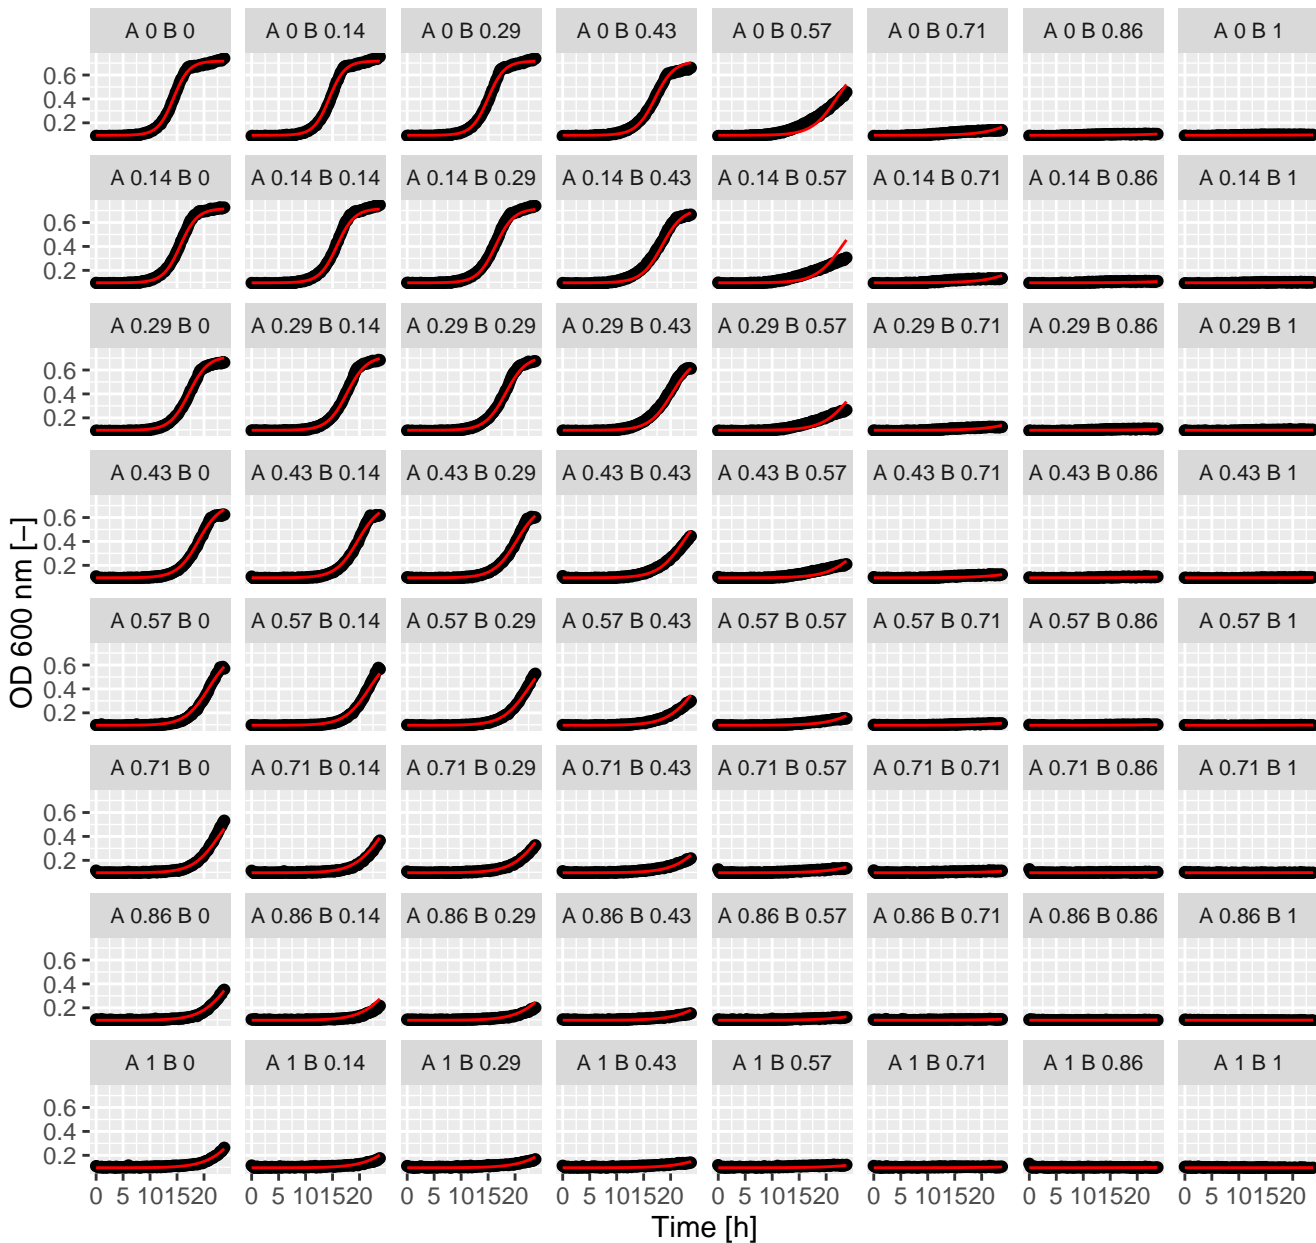



Ben.C3P (= Ax.Bx) exp. additivity (BI)  
Int\_AB = 0 and Int\_BA = 0 at EC50

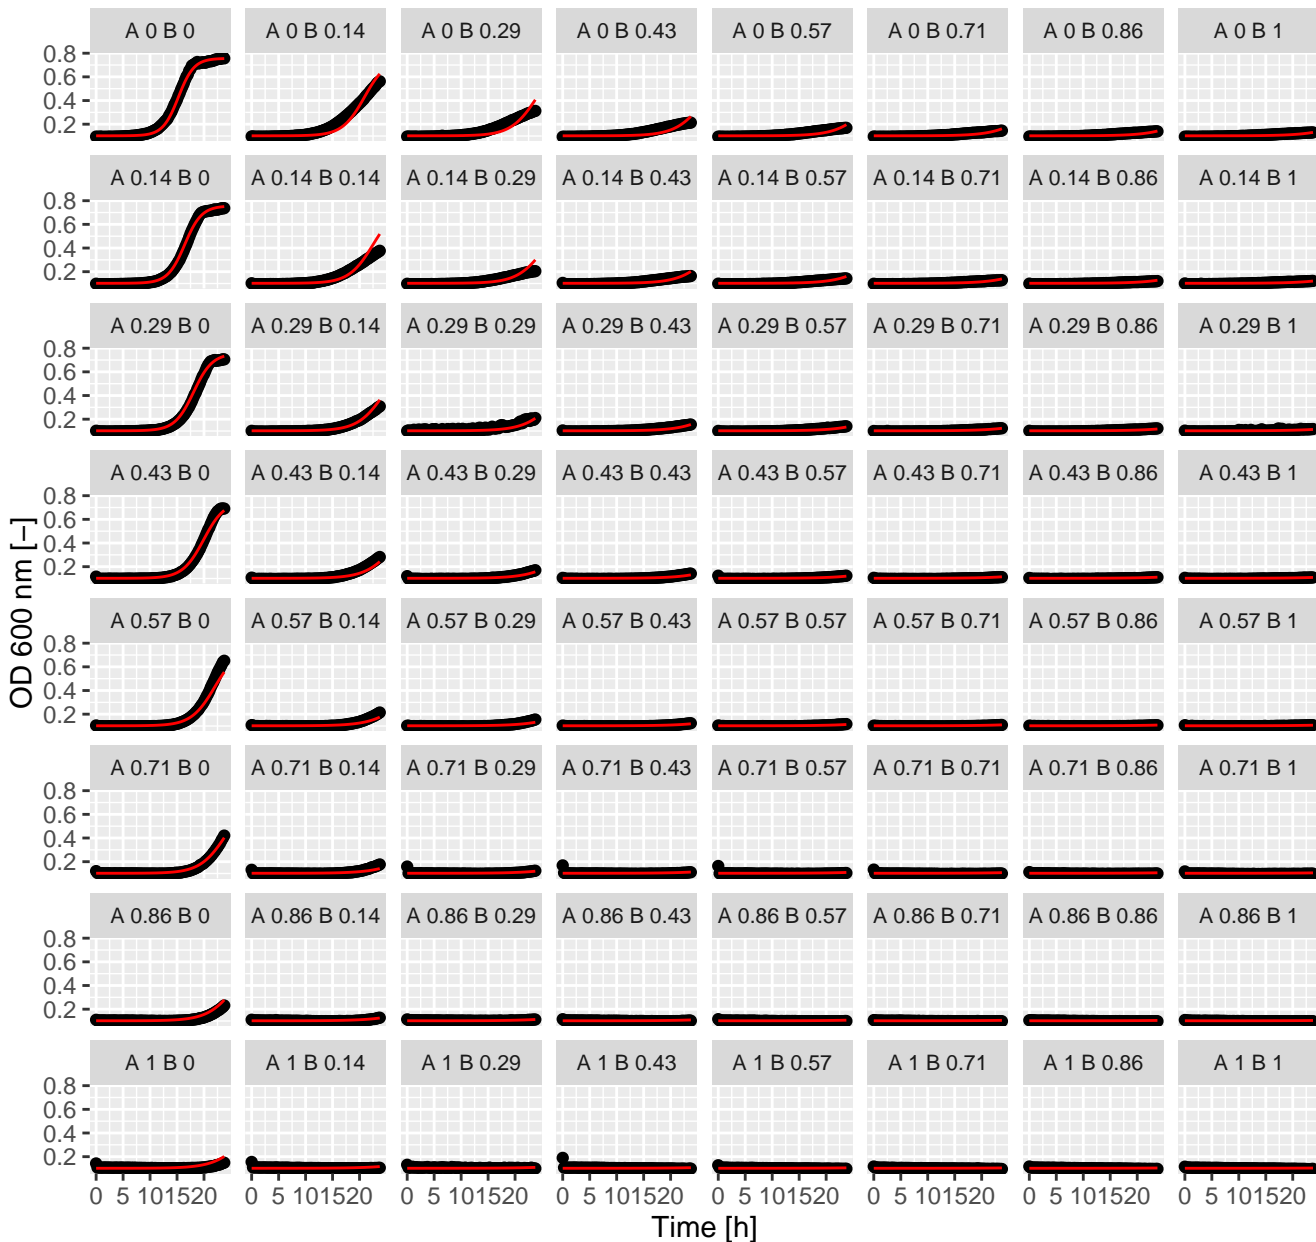

Ben.C3P (= Ax.Bx) full GPD1  
Int\_AB = 0.56 and Int\_BA = -0.24 at EC50

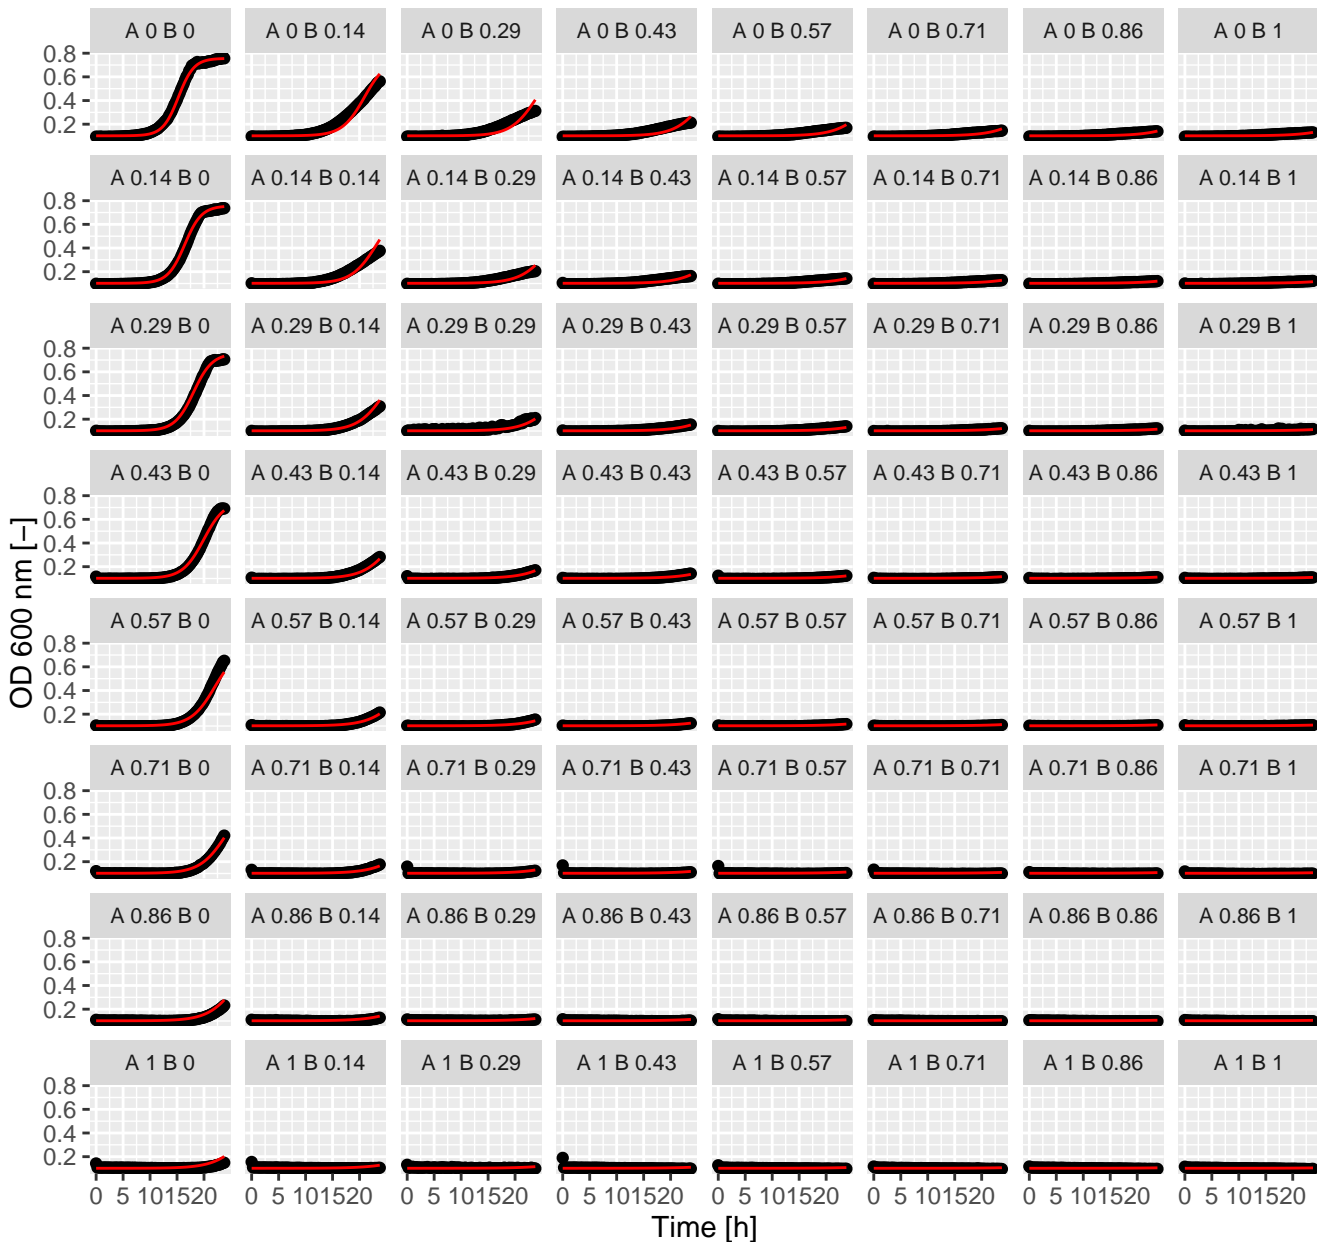

Ben.Bro (= Ax.Bx) exp. additivity (BI)  
Int\_AB = 0 and Int\_BA = 0 at EC50

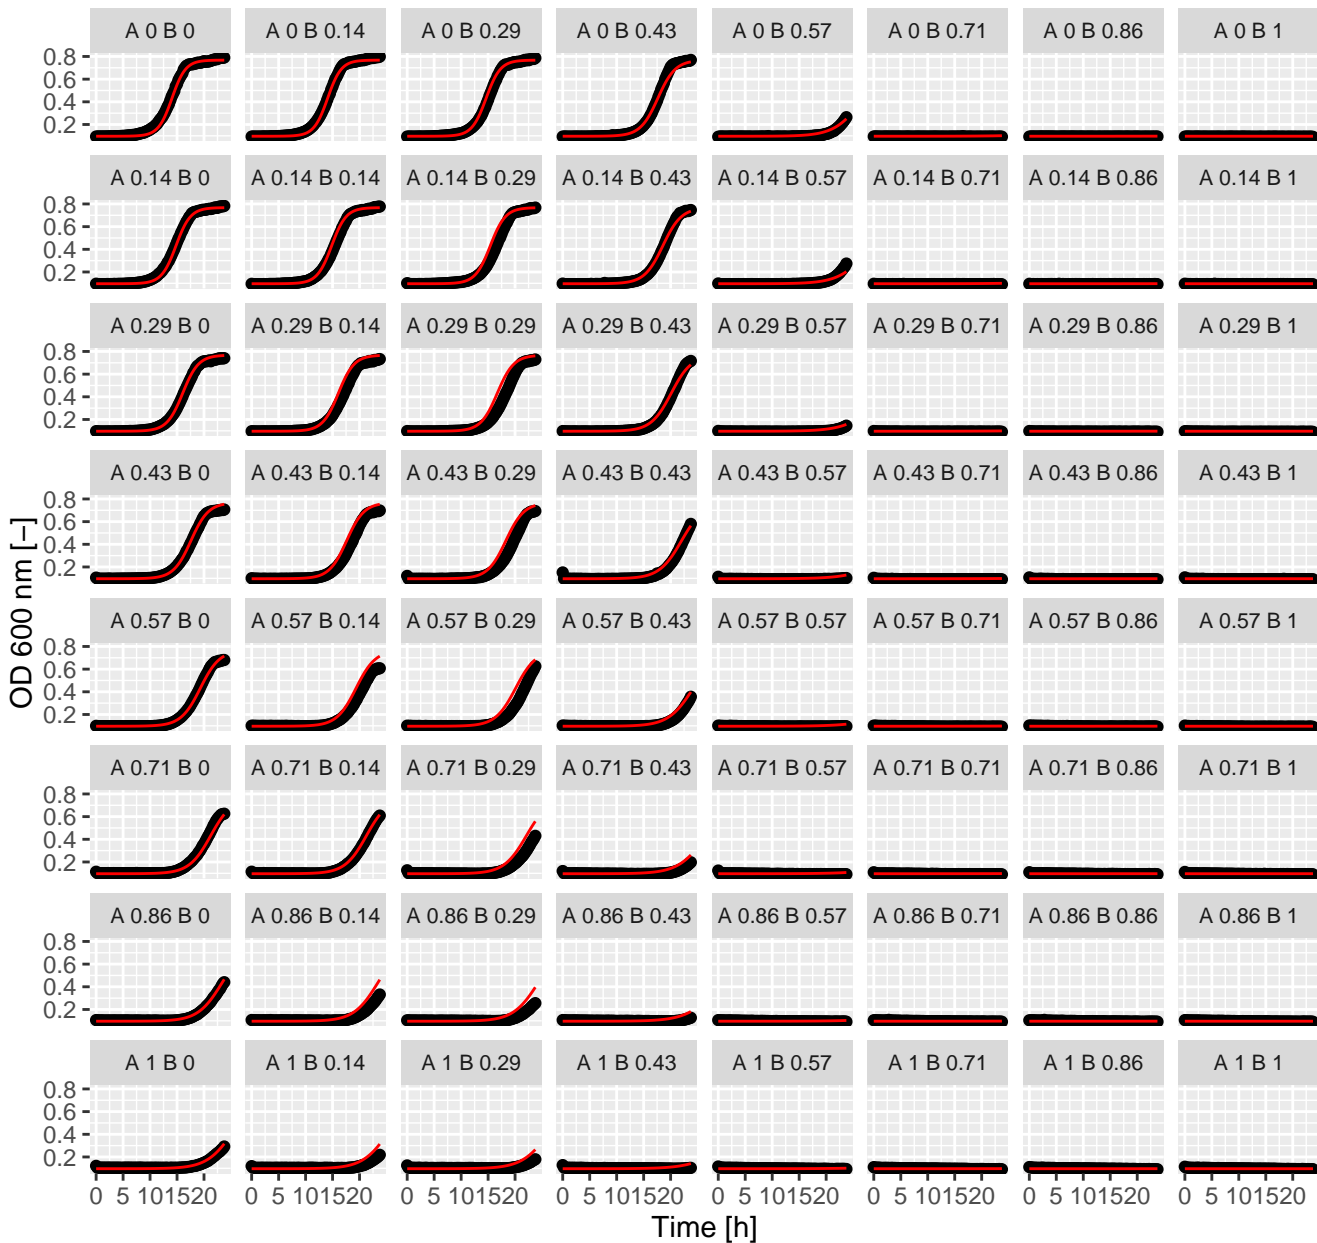

Ben.Bro (= Ax.Bx) full GPDI  
Int\_AB = -0.3 and Int\_BA = 0.2 at EC50

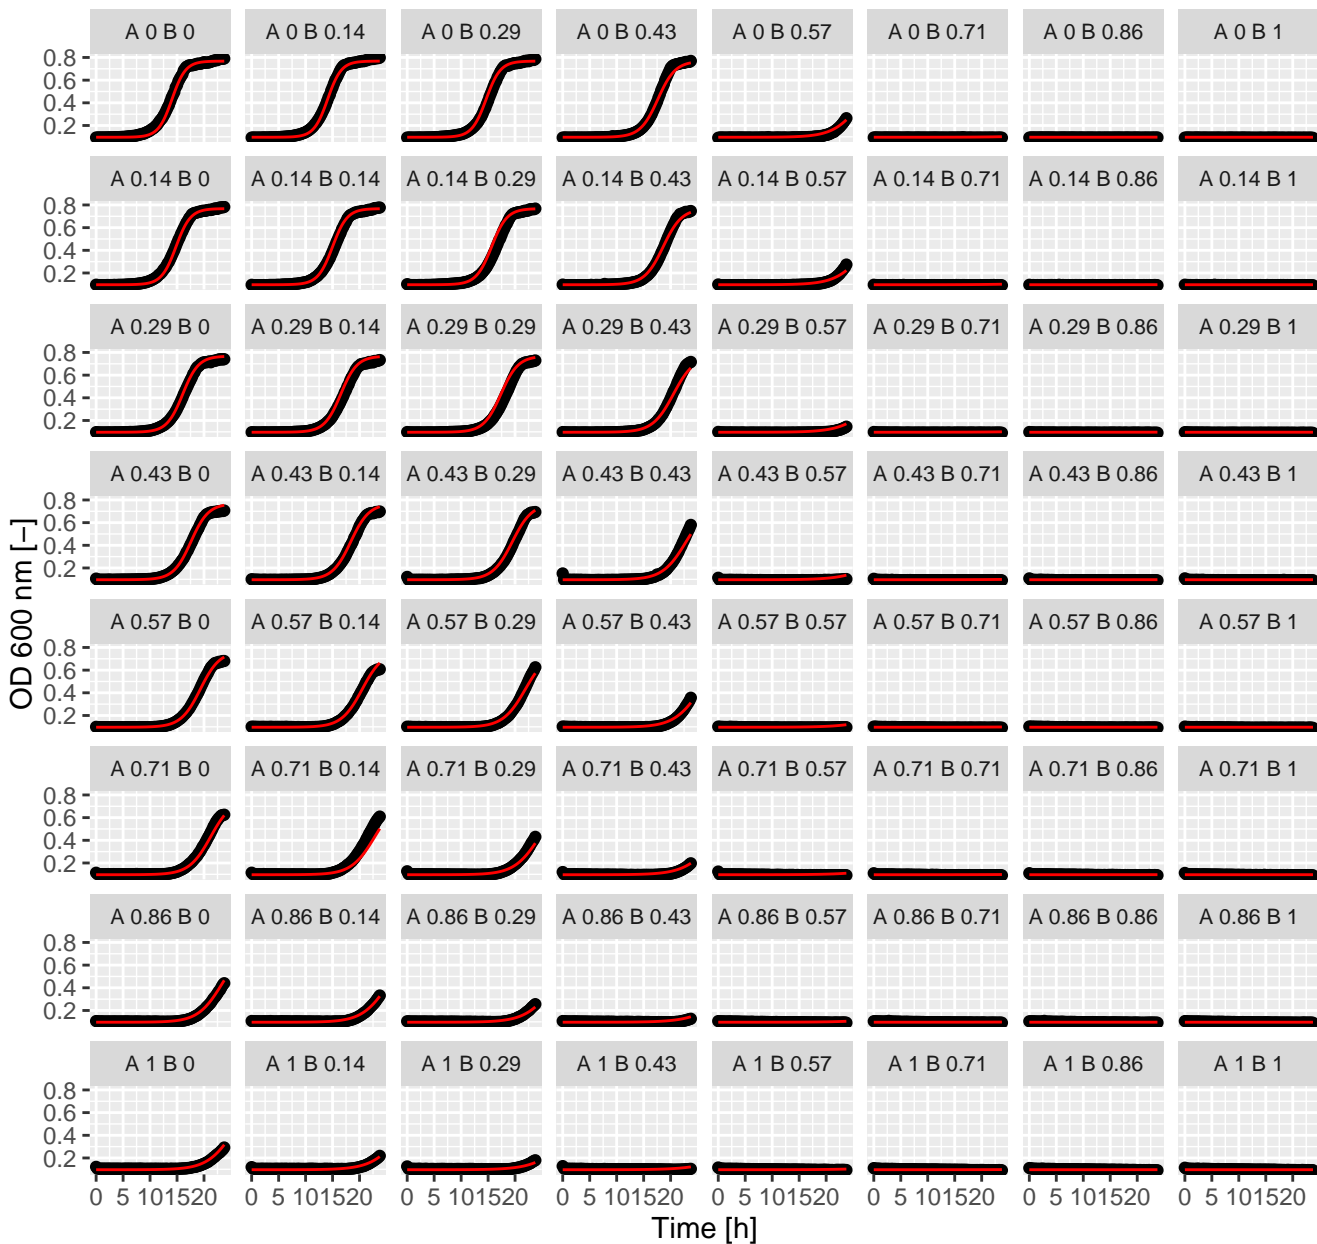

Ben.Ben (= Ax.Bx) exp. additivity (BI)  
Int\_AB = 0 and Int\_BA = 0 at EC50

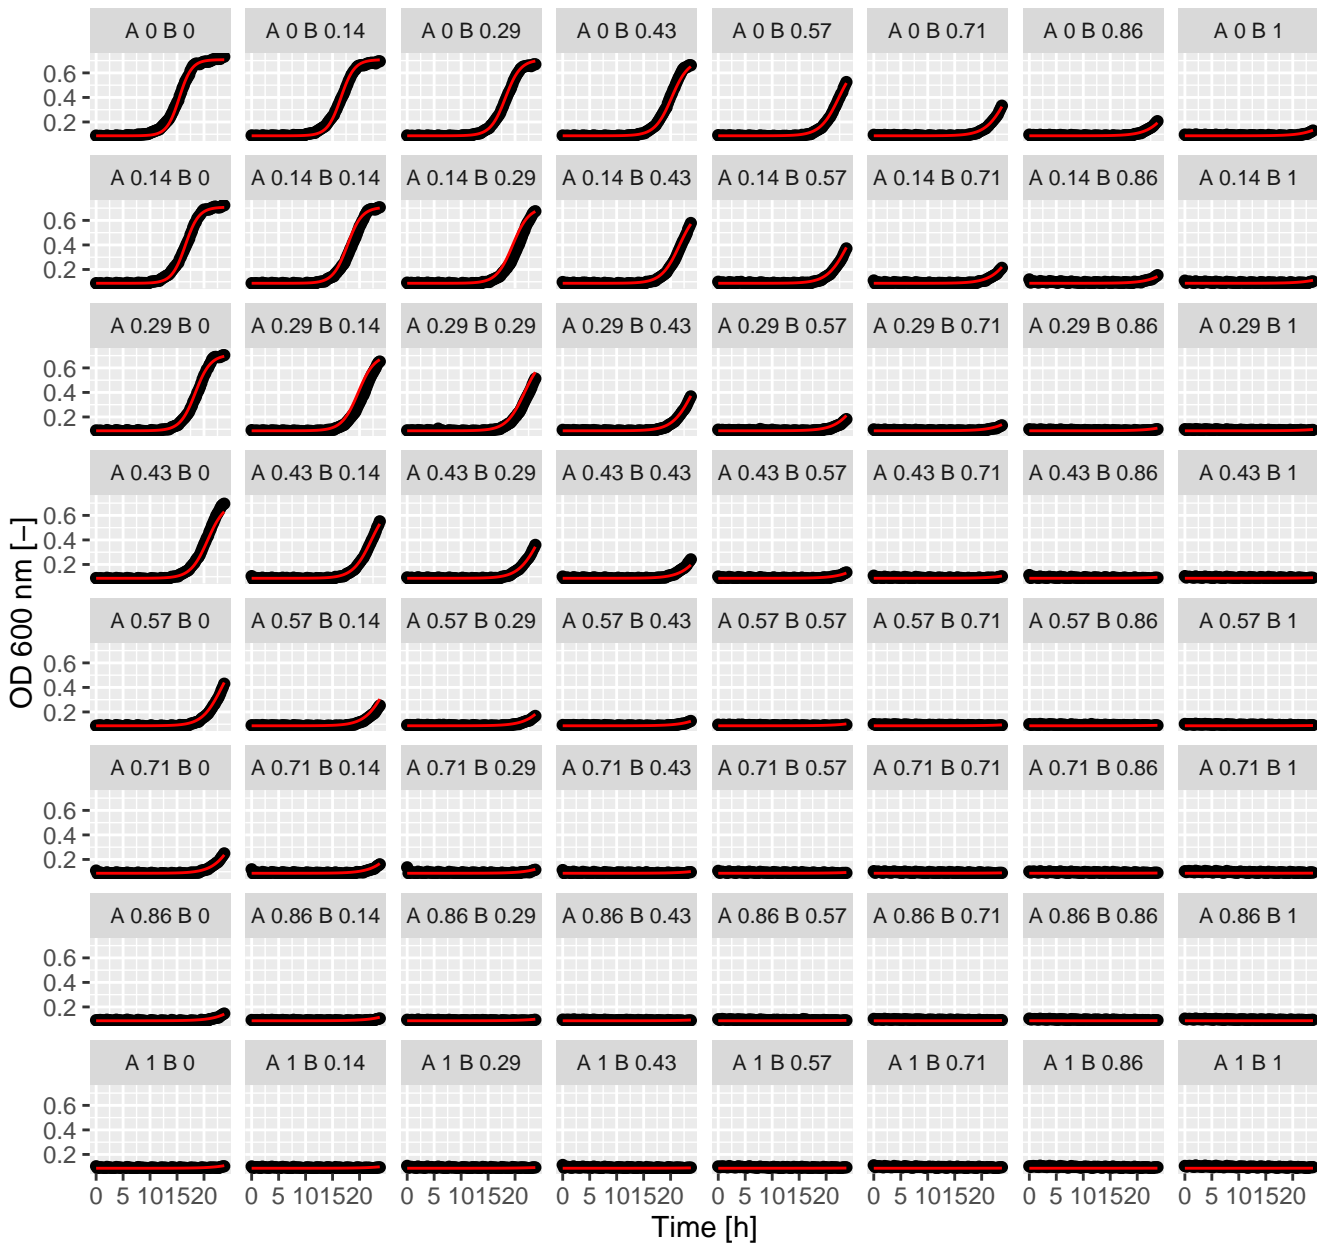

Ben.Ben (= Ax.Bx) full GPDI  
Int\_AB = -0.06 and Int\_BA = -0.06 at EC50

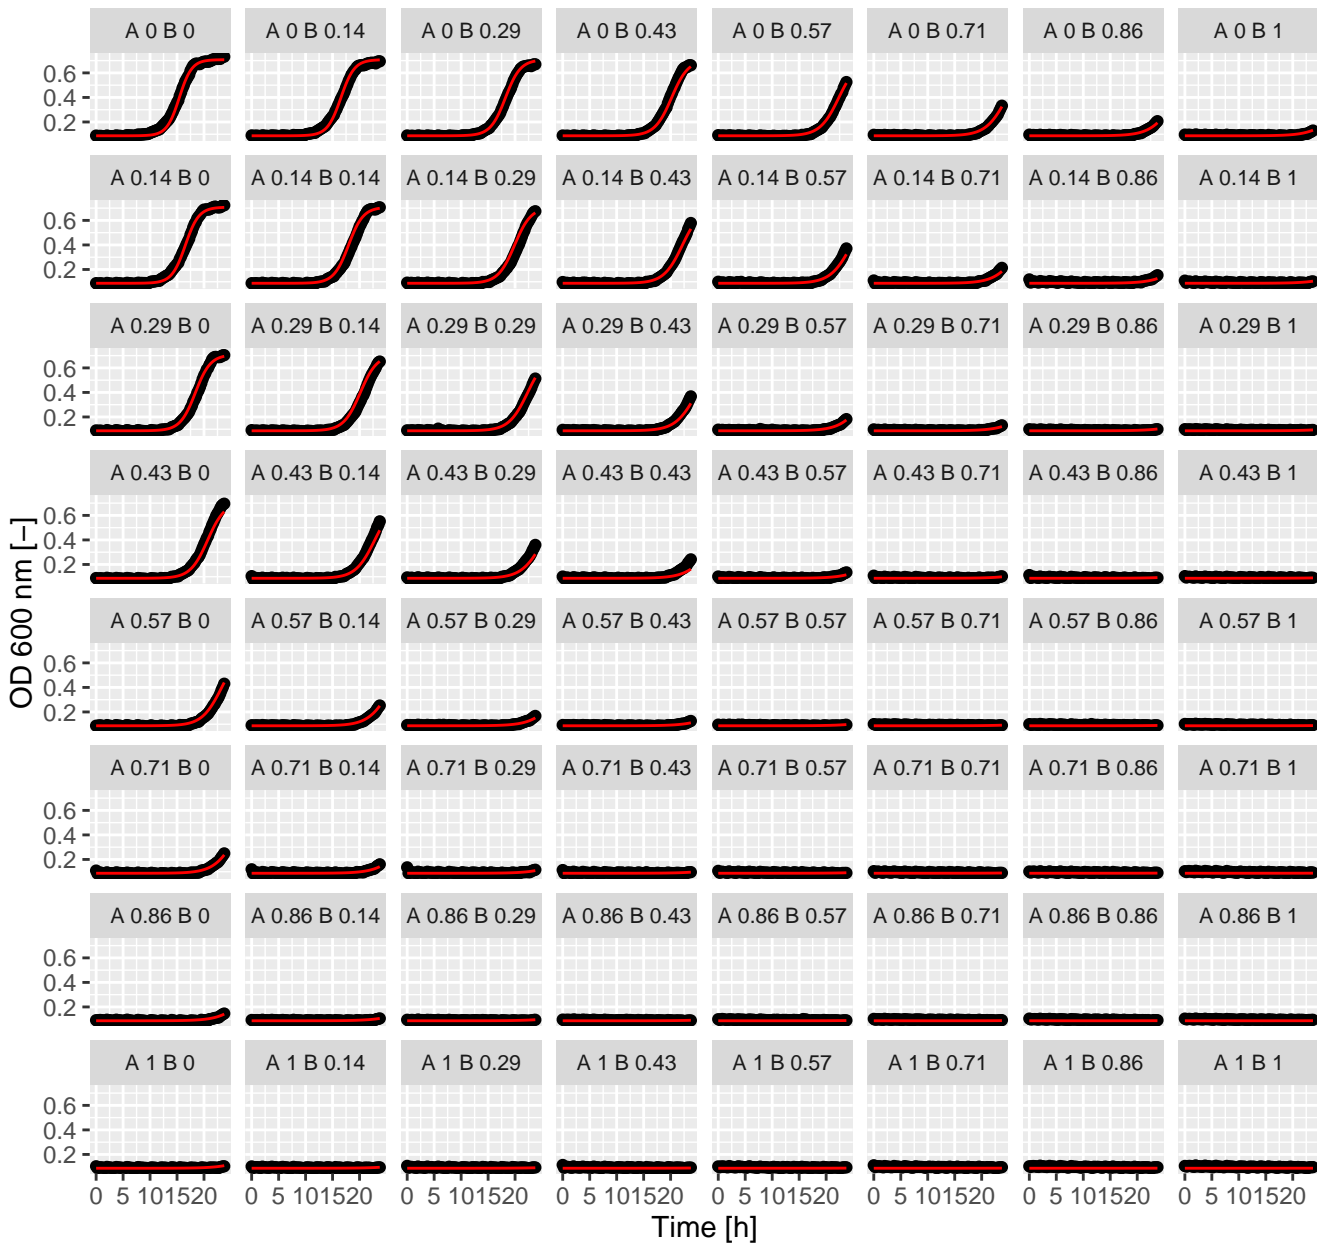

Ani.Ter (= Ax.Bx) exp. additivity (BI)  
Int\_AB = 0 and Int\_BA = 0 at EC50

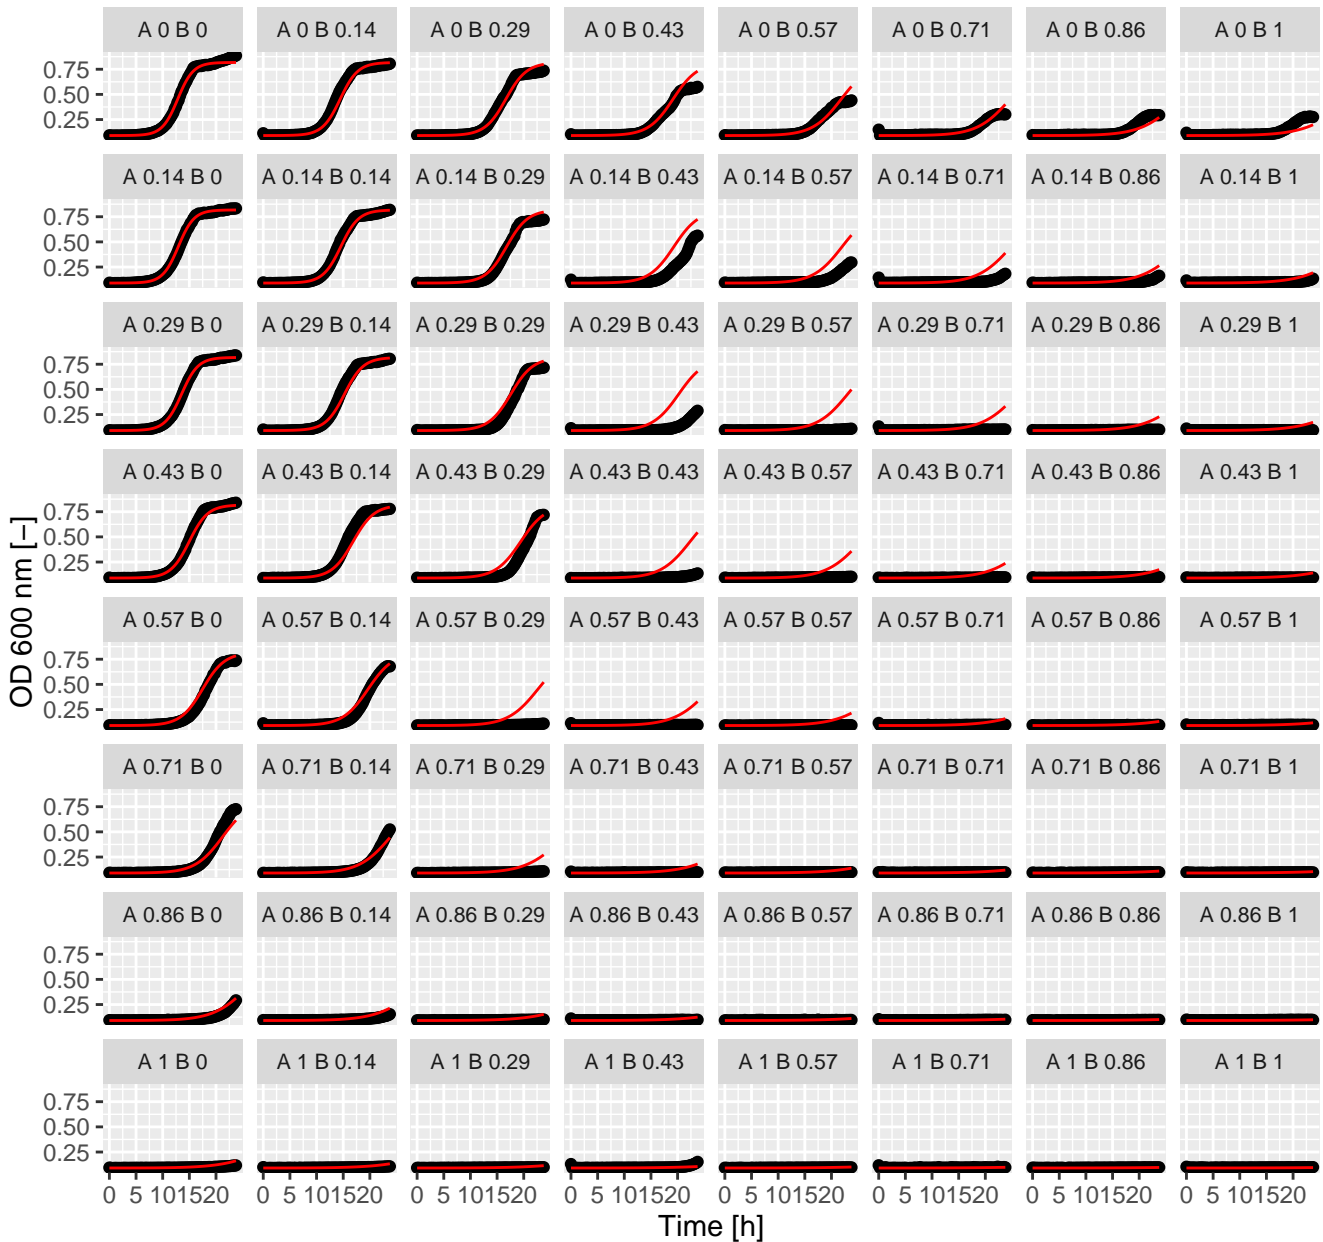

Ani.Ter (= Ax.Bx) full GPDI  
Int\_AB = 0.24 and Int\_BA = -0.57 at EC50

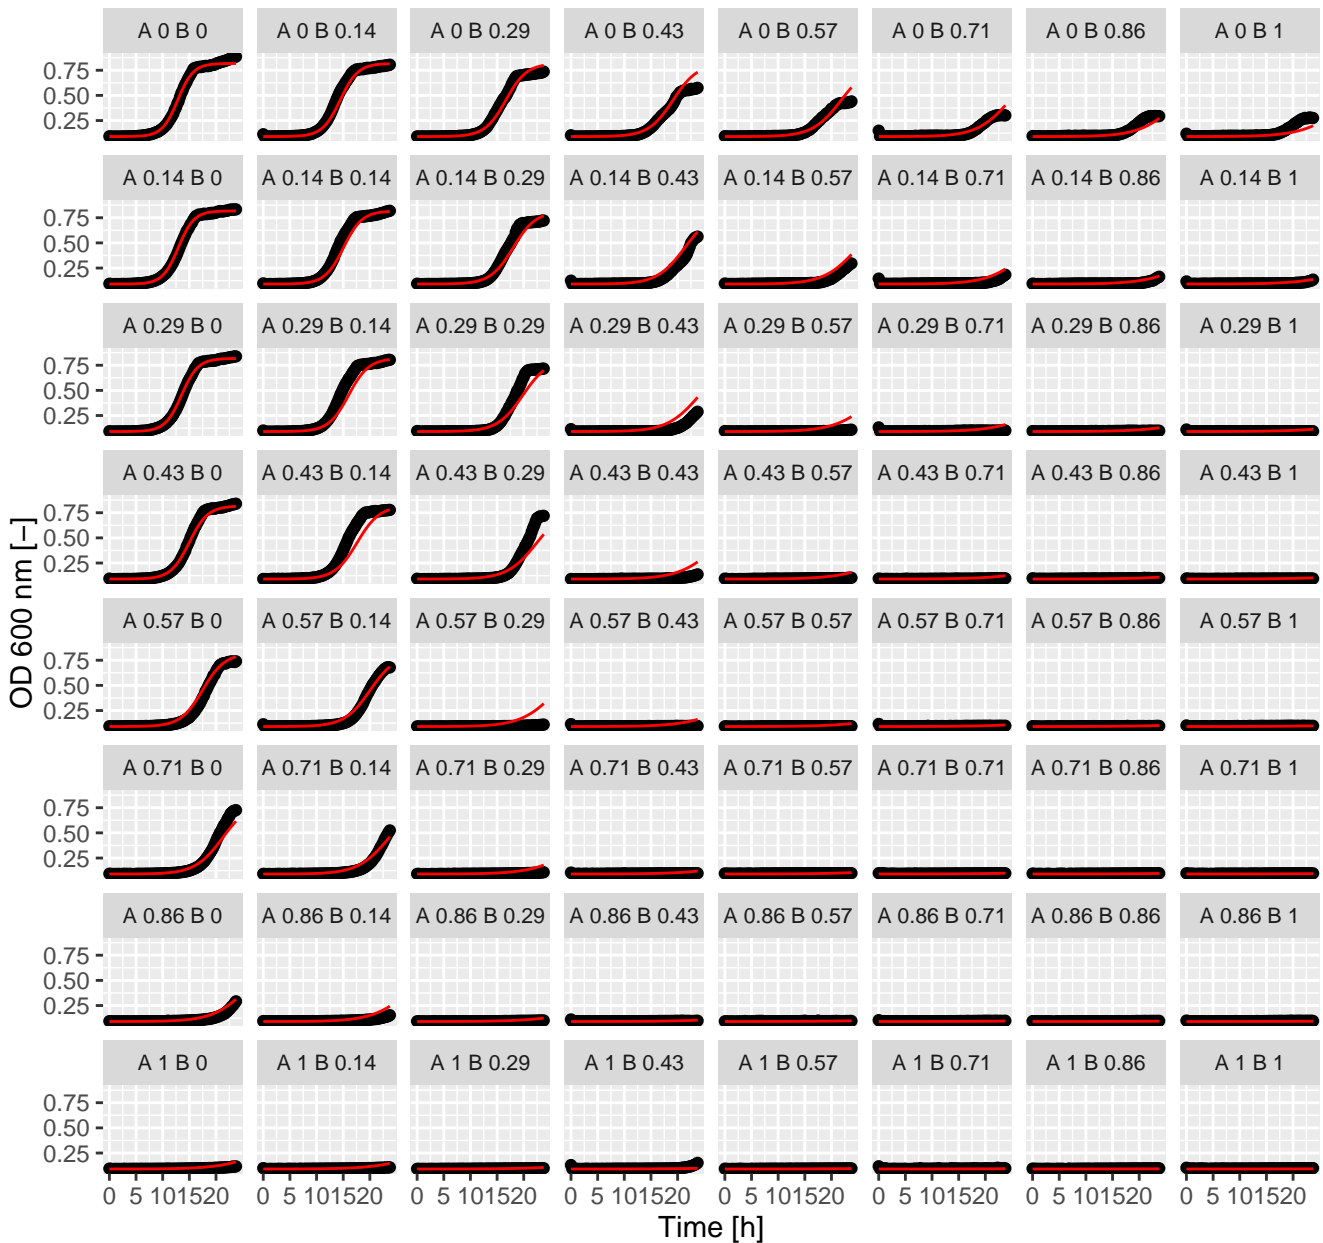



Ani.Tac (= Ax.Bx) exp. additivity (BI)  
Int\_AB = 0 and Int\_BA = 0 at EC50

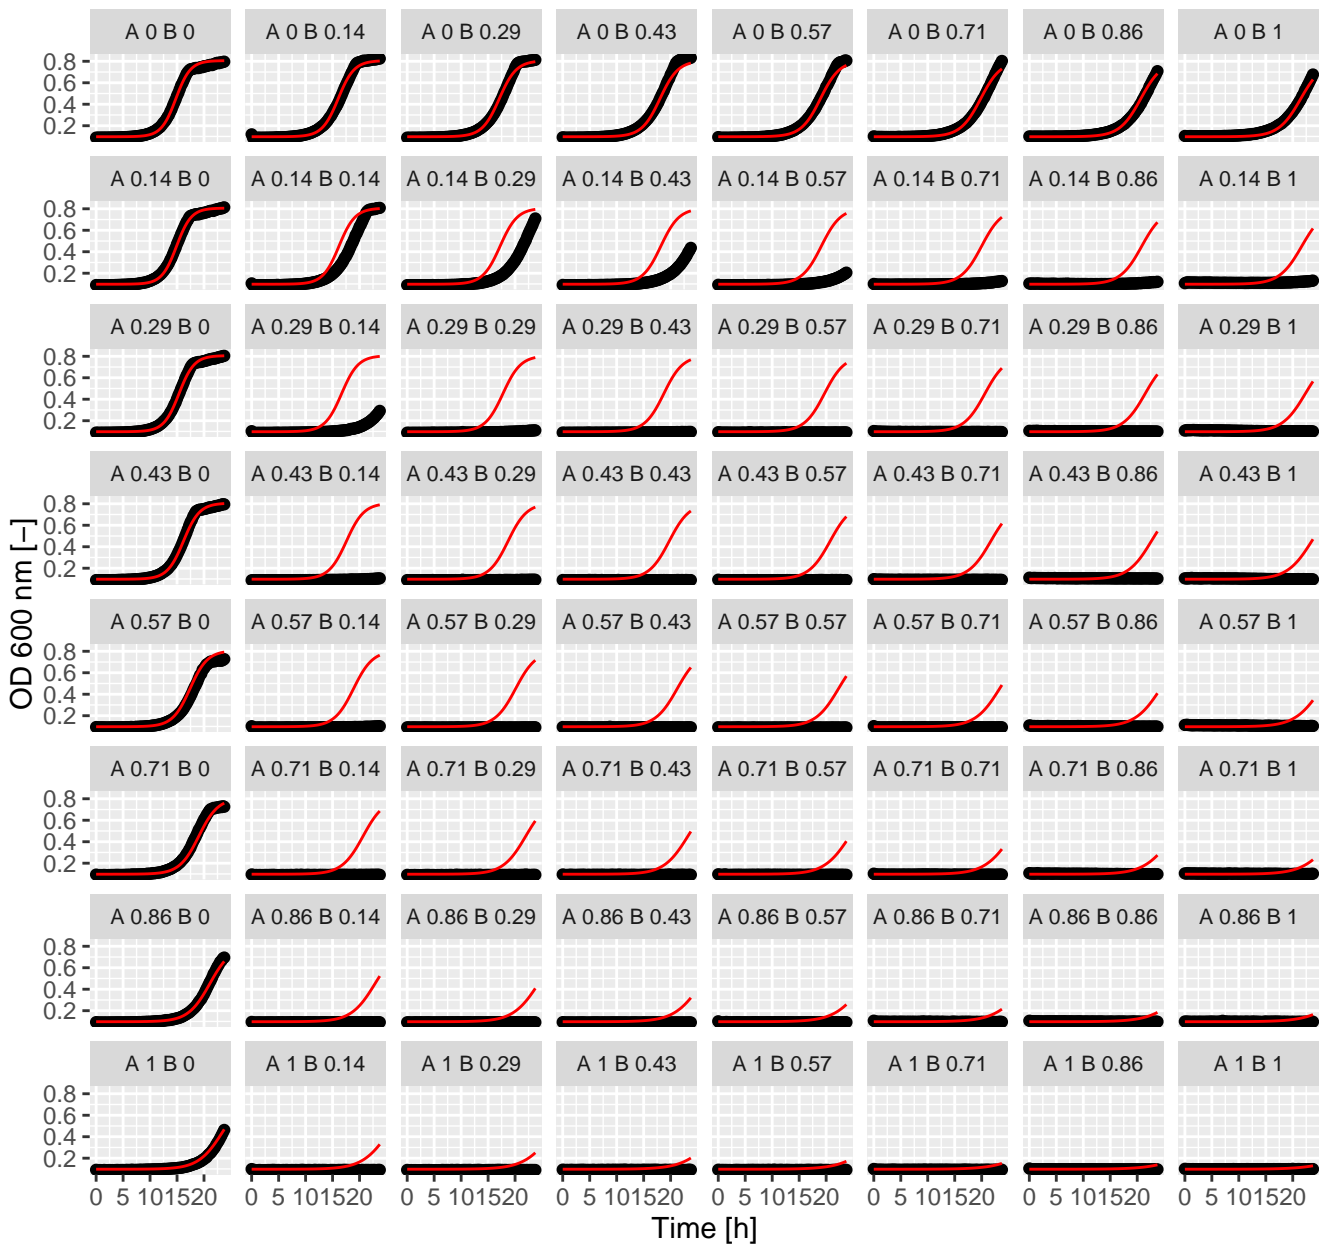

Ani.Tac (= Ax.Bx) full GPDI  
Int\_AB = -0.89 and Int\_BA = 0.7 at EC50

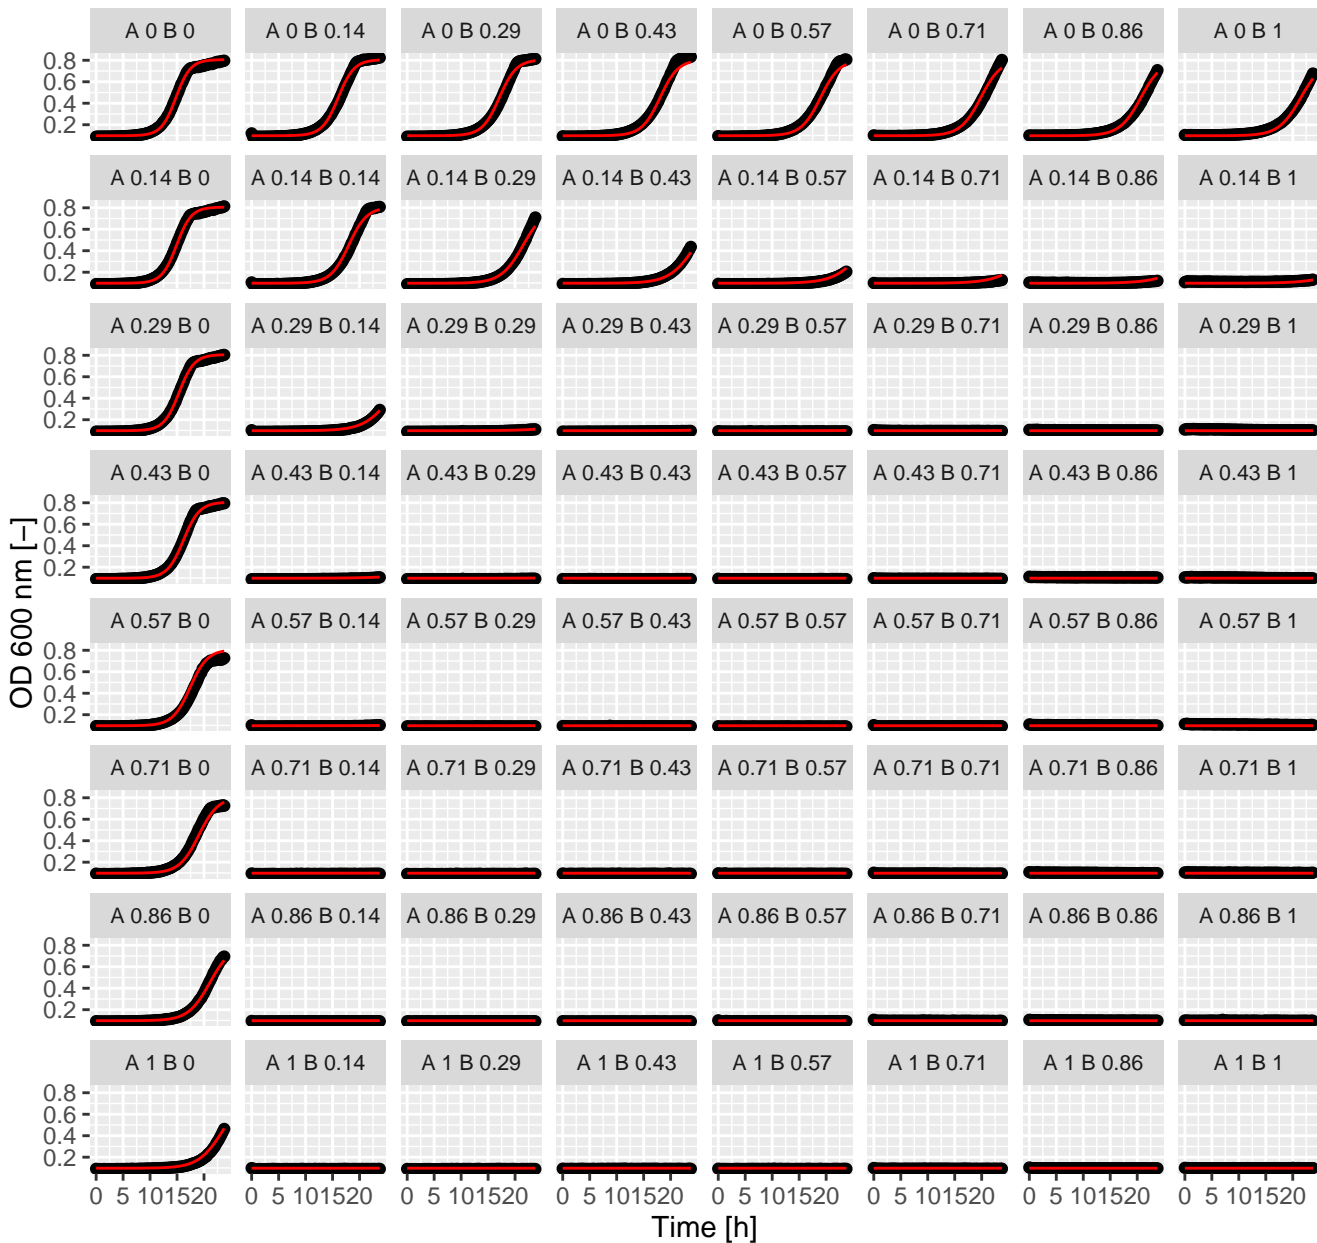

Ani.Sta (= Ax.Bx) exp. additivity (BI)  
Int\_AB = 0 and Int\_BA = 0 at EC50

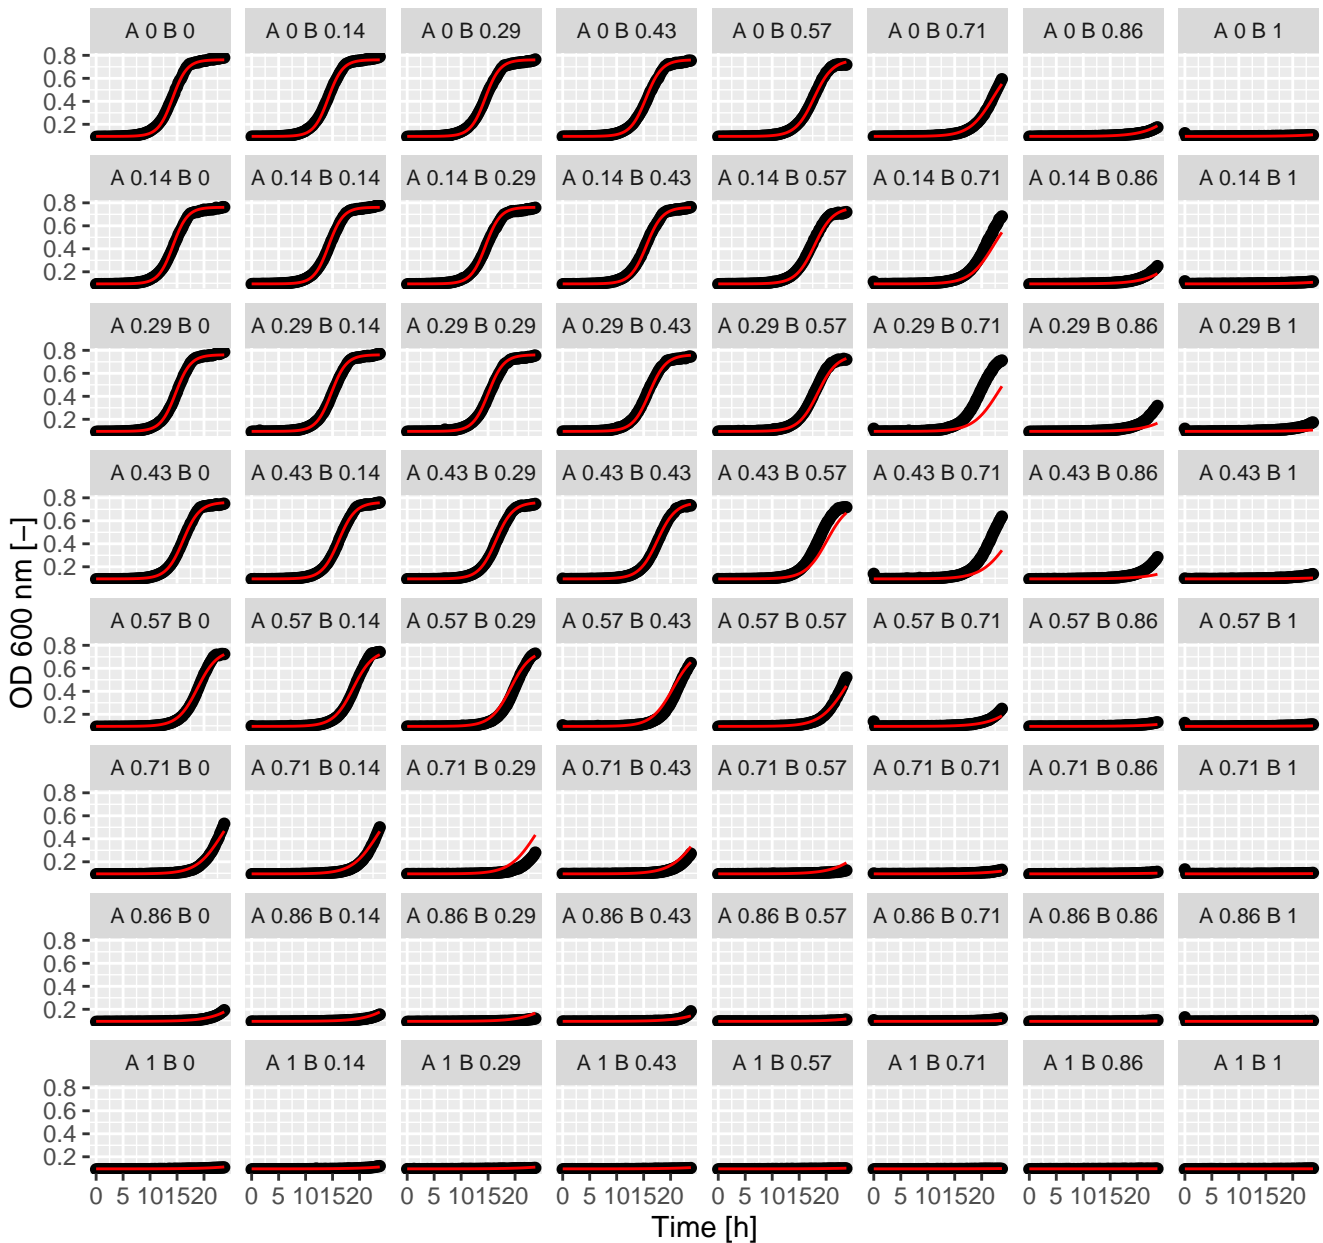

Ani.Sta (= Ax.Bx) full GPDI  
Int\_AB = -0.16 and Int\_BA = 0.41 at EC50

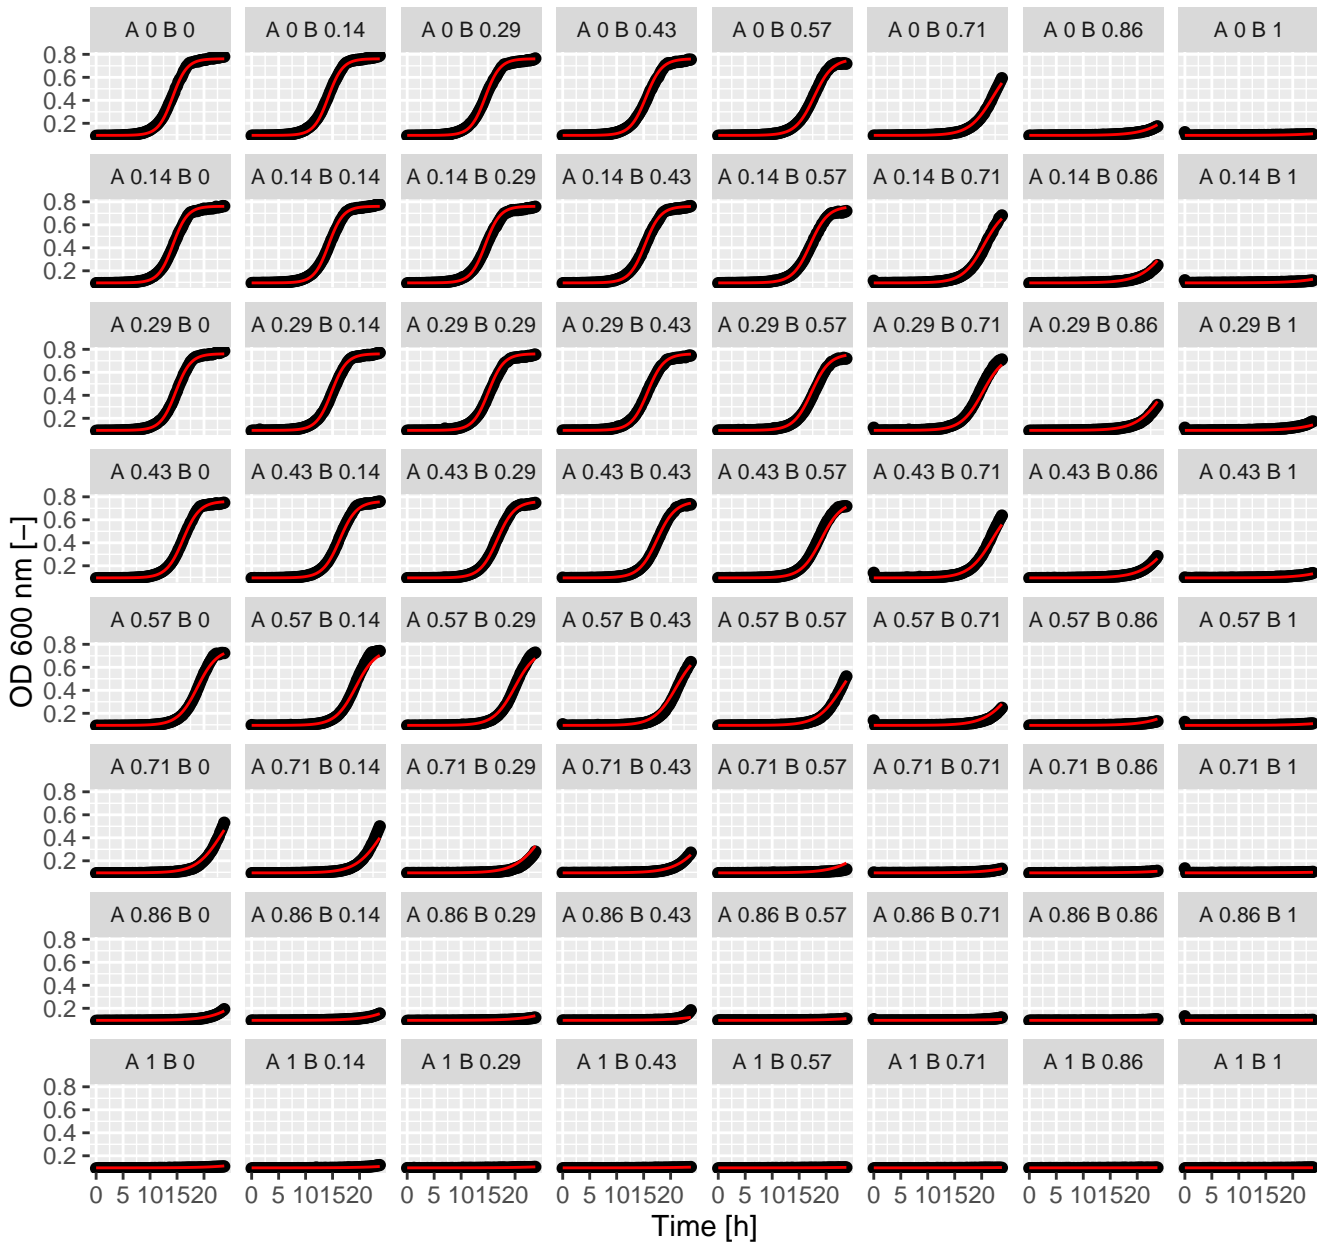

Ani.Pen (= Ax.Bx) exp. additivity (BI)  
Int\_AB = 0 and Int\_BA = 0 at EC50

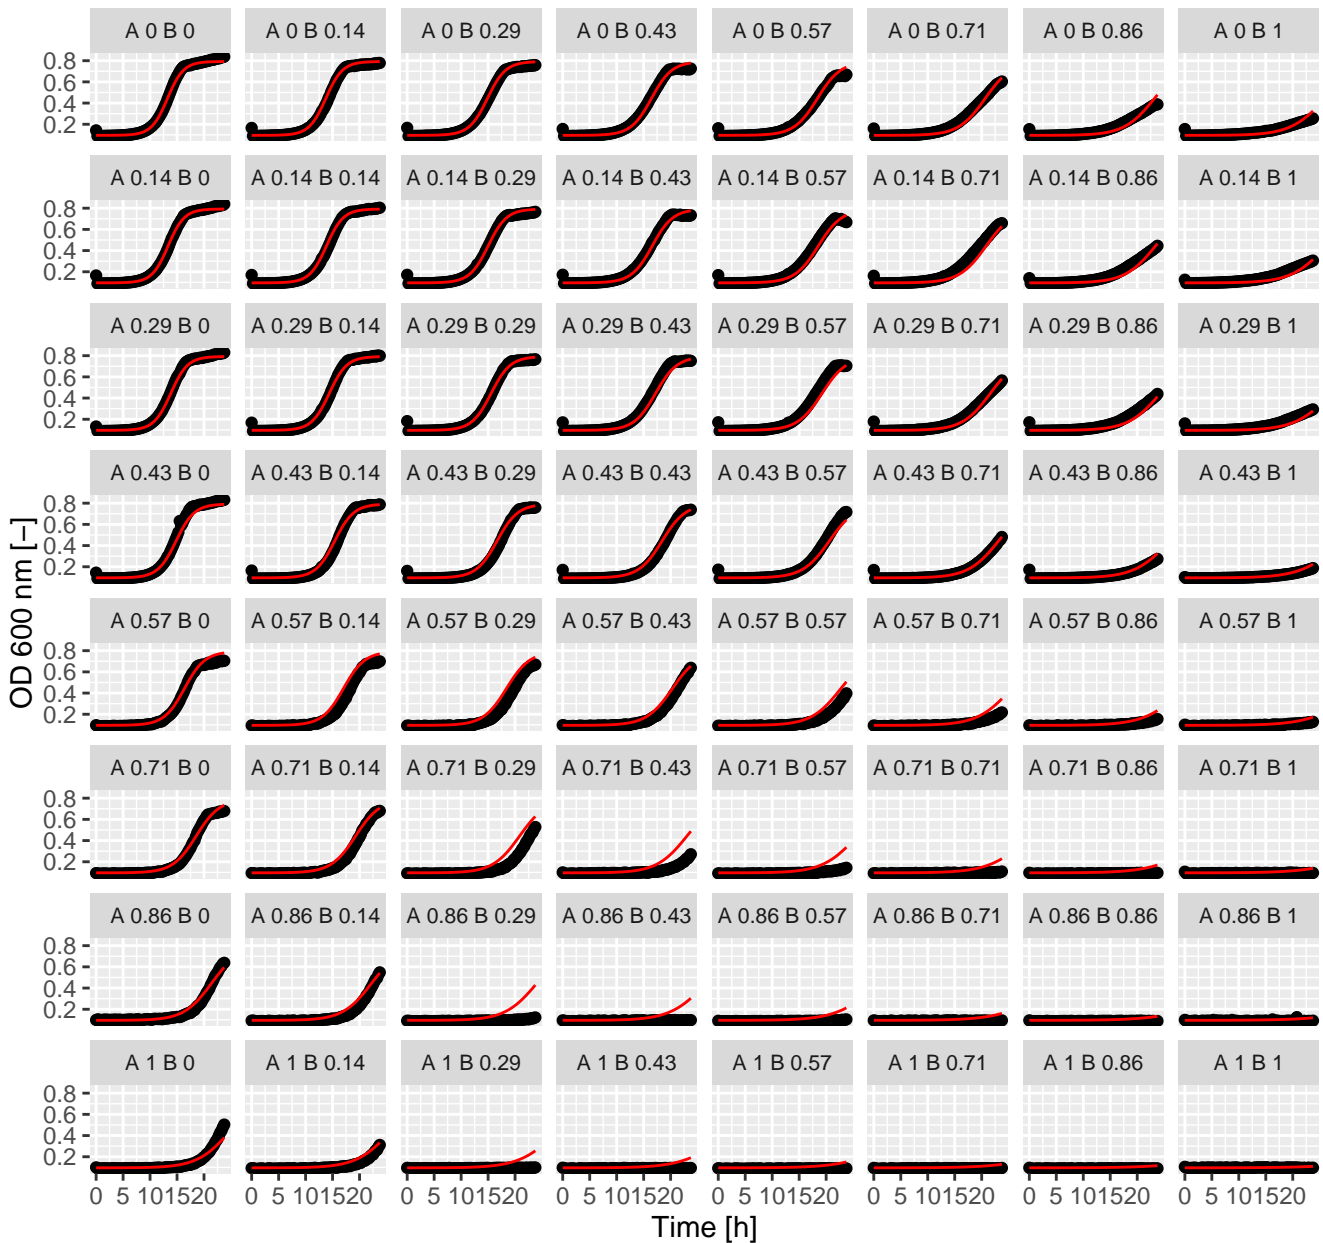

Ani.Pen (= Ax.Bx) full GPDI  
Int\_AB = -0.43 and Int\_BA = 0.95 at EC50

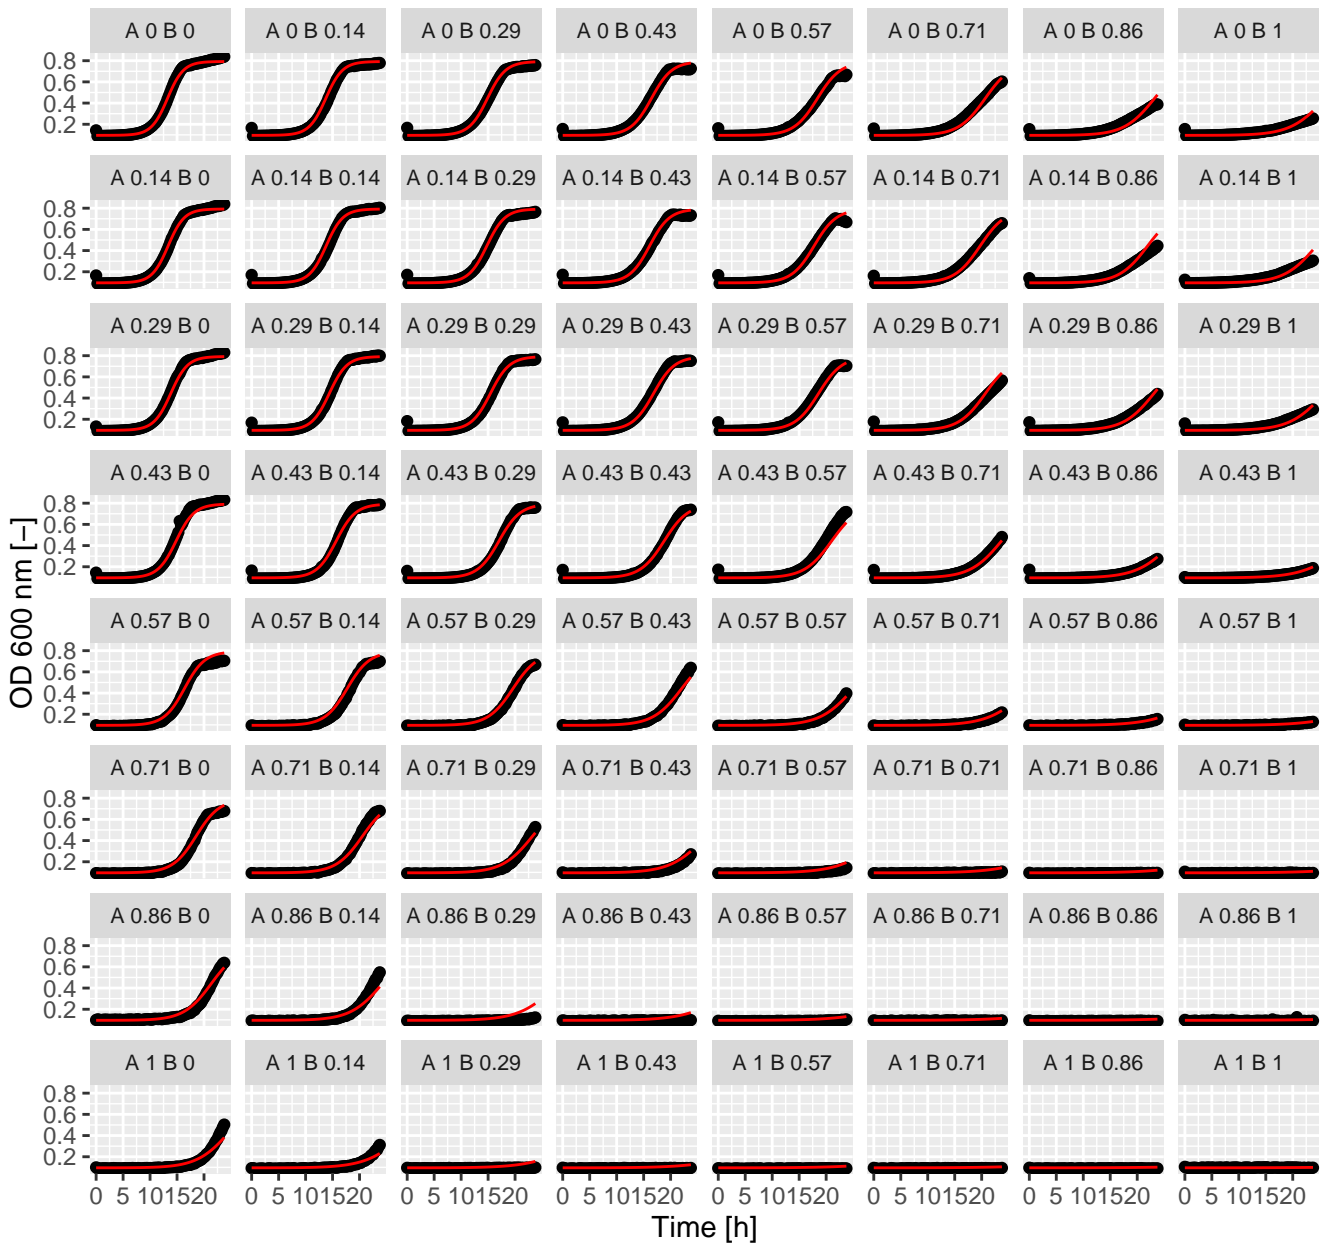

Ani.Lat (= Ax.Bx) exp. additivity (BI)  
Int\_AB = 0 and Int\_BA = 0 at EC50

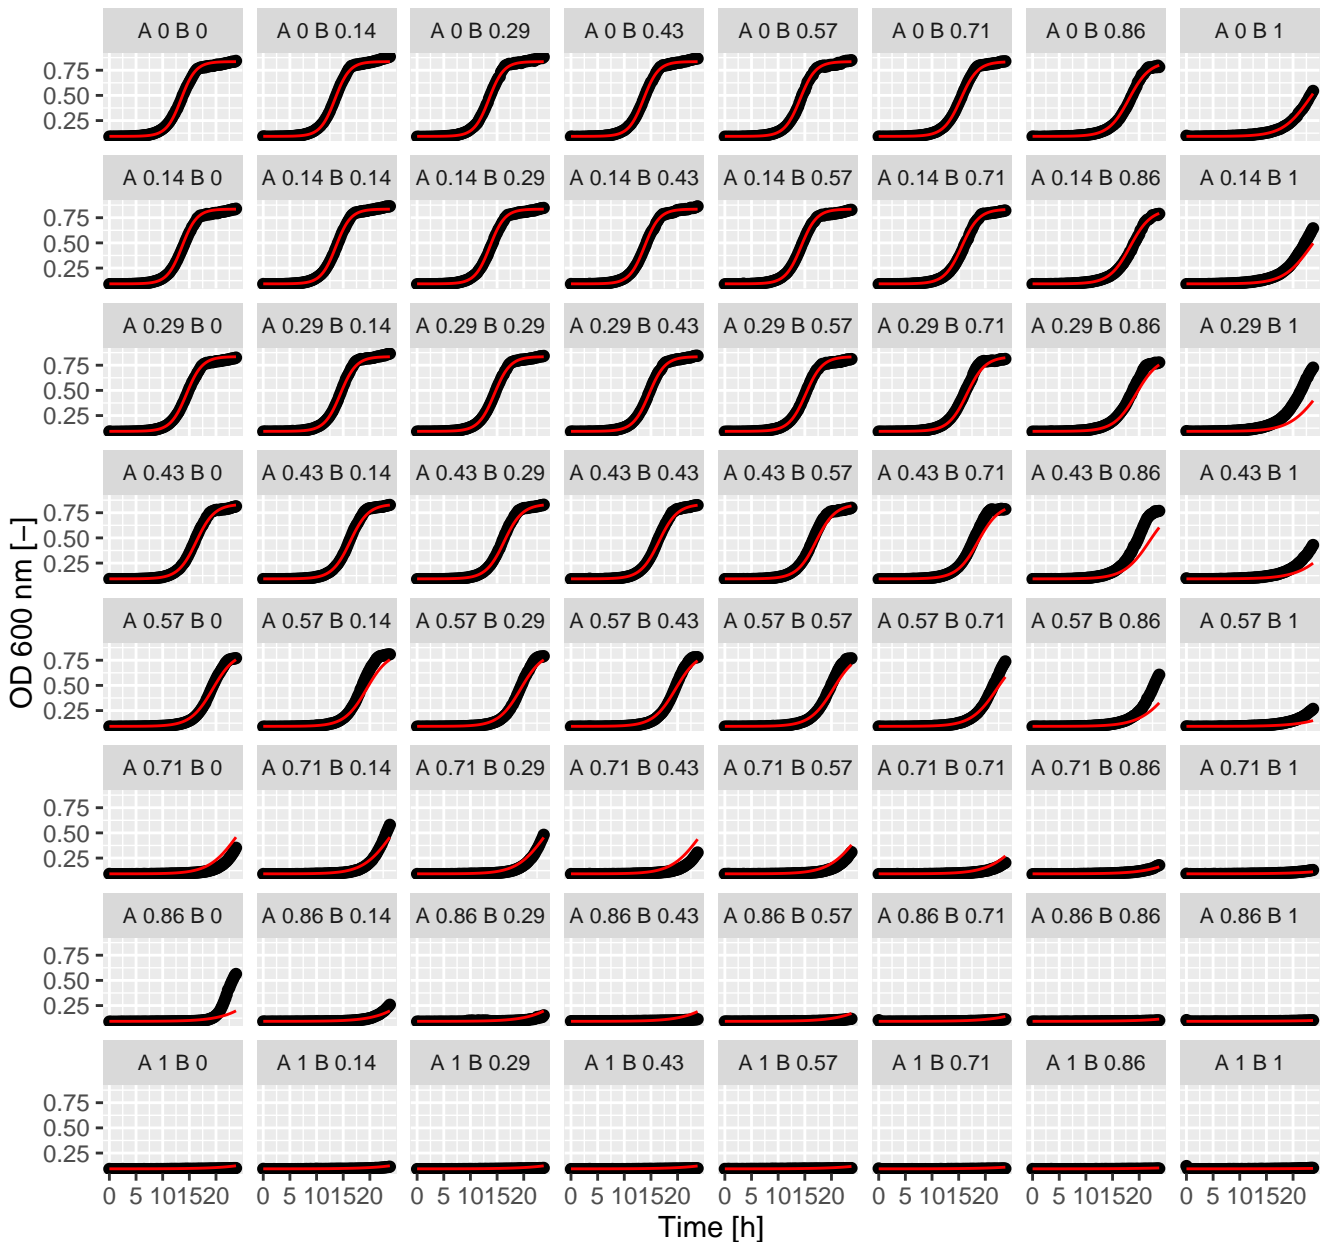

Ani.Lat (= Ax.Bx) full GPDI  
Int\_AB = -0.03 and Int\_BA = 0.19 at EC50

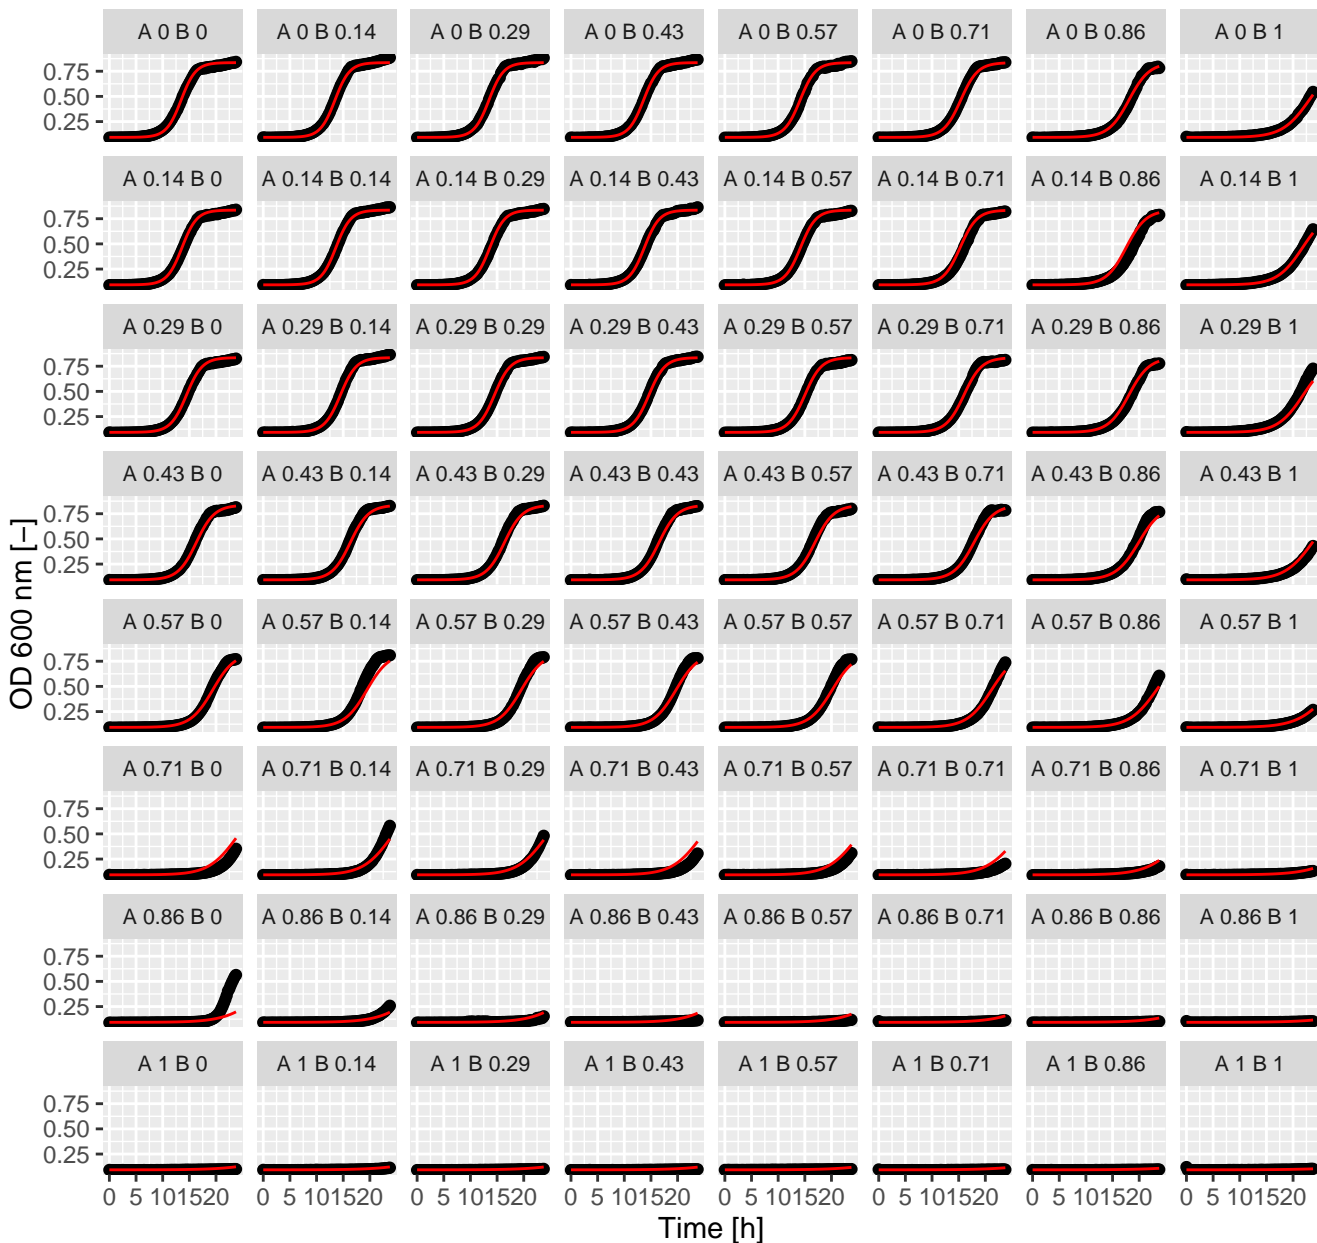



Ani.Ben (= Ax.Bx) exp. additivity (BI)  
Int\_AB = 0 and Int\_BA = 0 at EC50

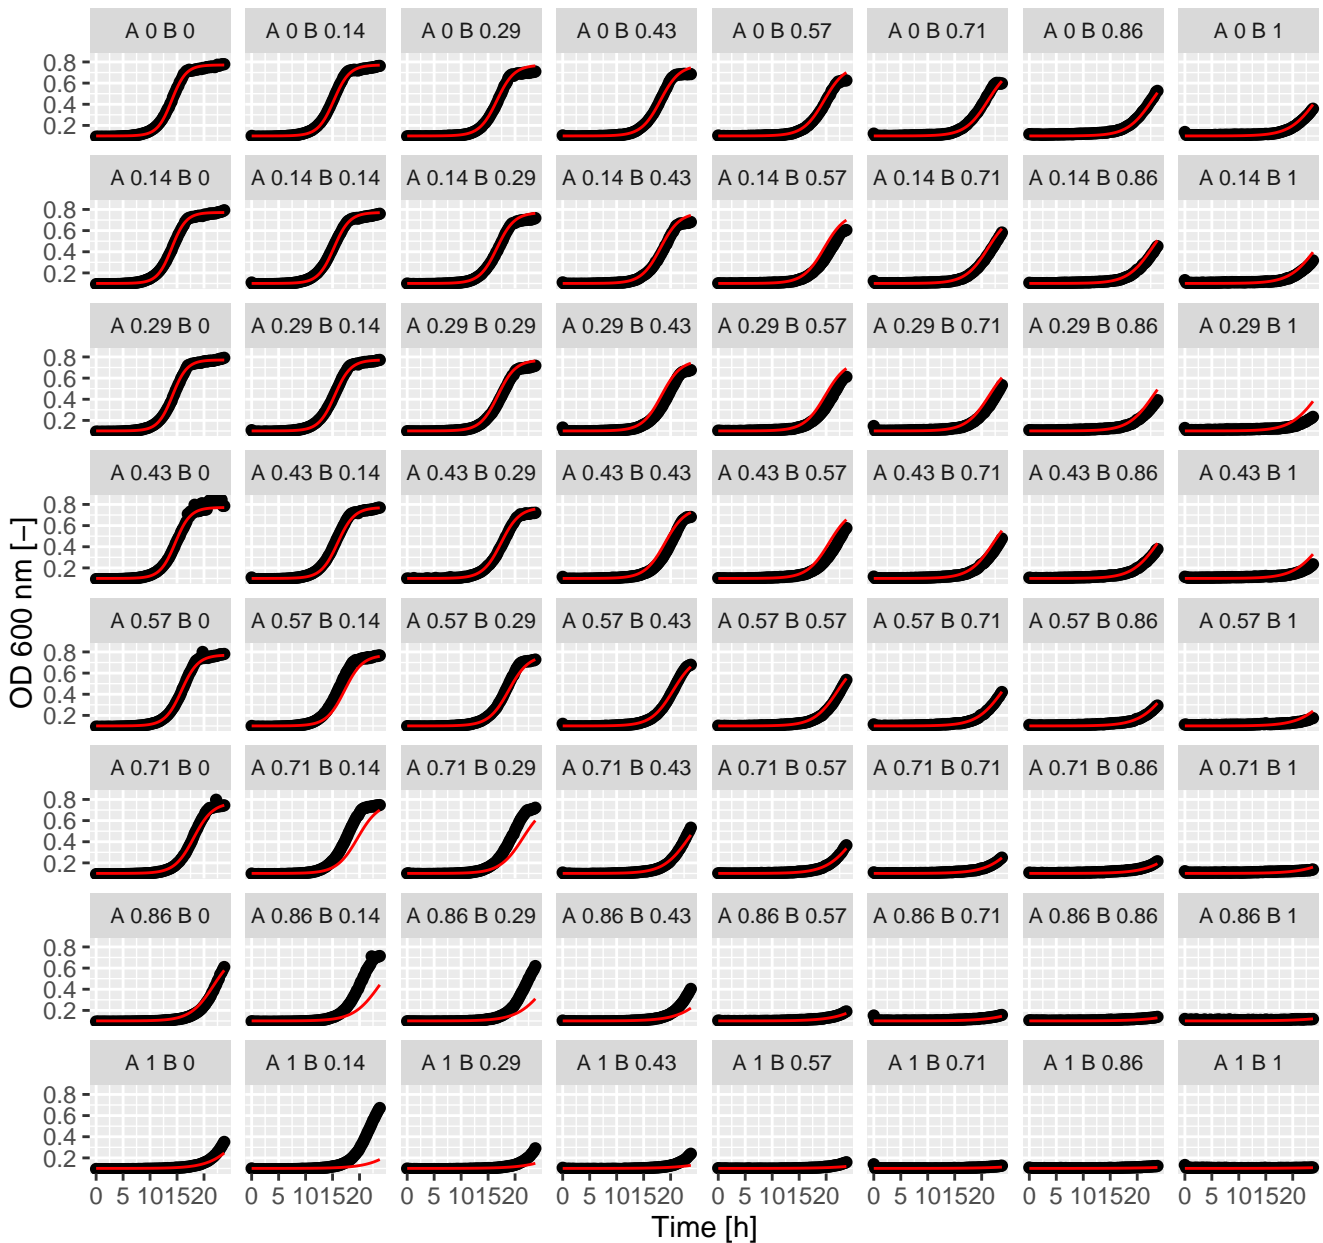

Ani.Ben (= Ax.Bx) full GPDI  
Int\_AB = 0.3 and Int\_BA = -0.33 at EC50

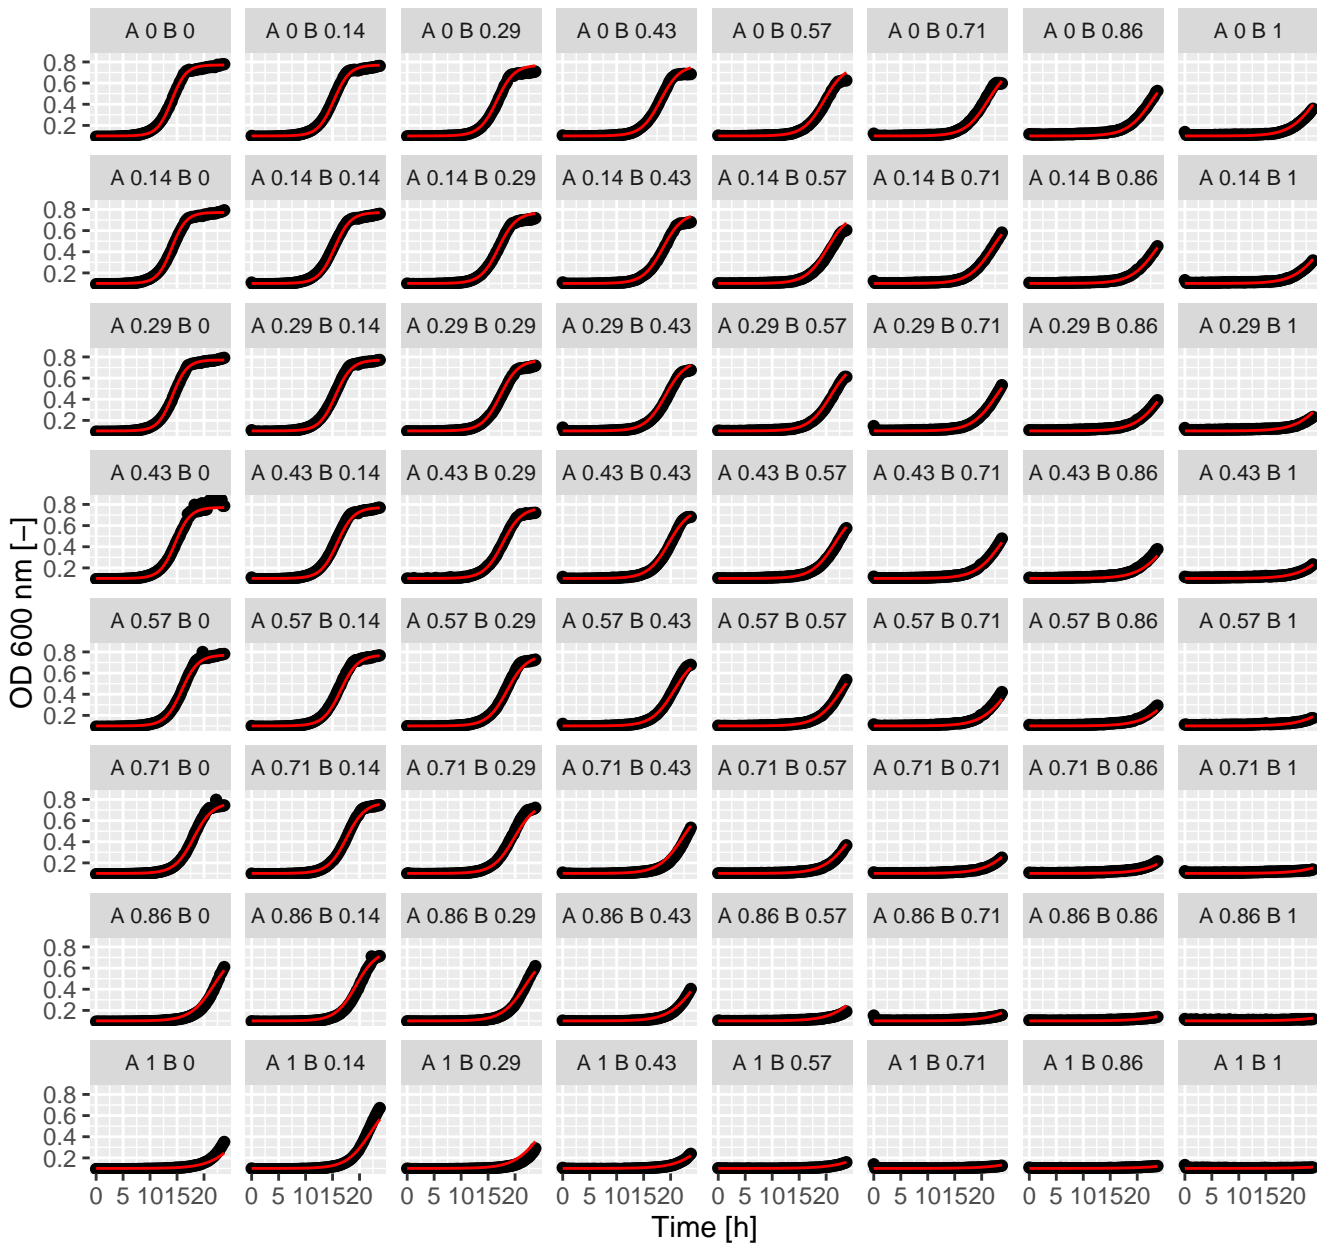

Ani.Anii (= Ax.Bx) exp. additivity (BI)  
Int\_AB = 0 and Int\_BA = 0 at EC50

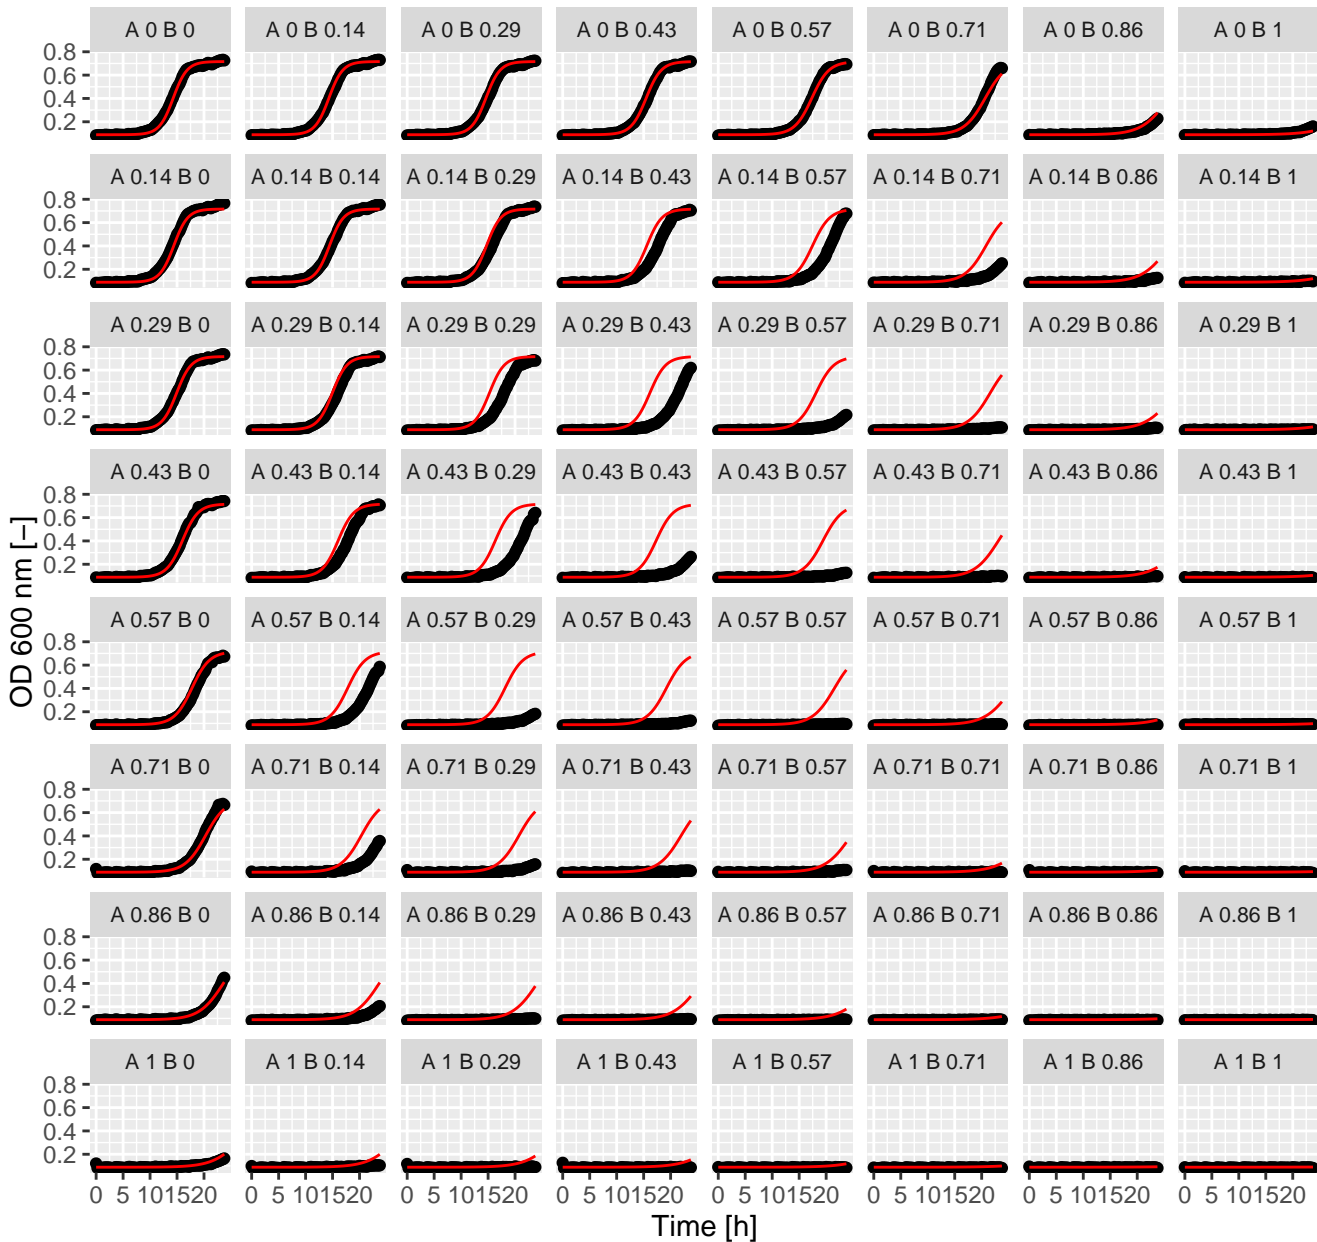

Ani.Ani (= Ax.Bx) full GPDI  
Int\_AB = -0.61 and Int\_BA = -0.38 at EC50

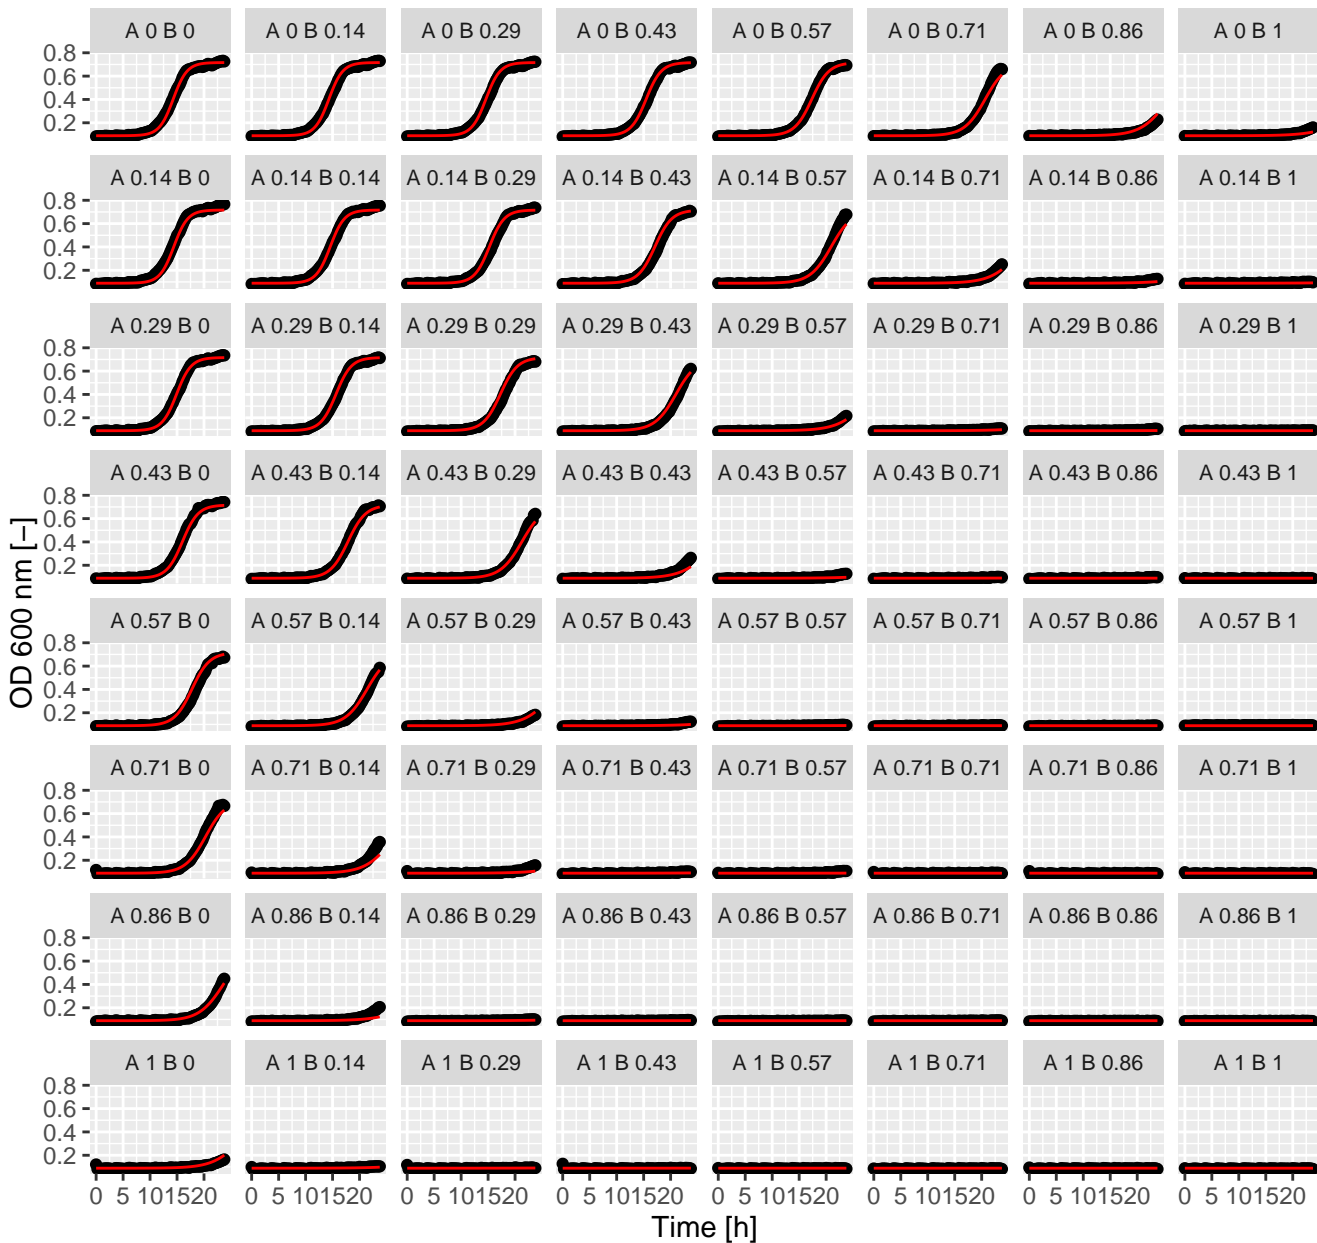

Amb.Ter (= Ax.Bx) exp. additivity (BI)  
Int\_AB = 0 and Int\_BA = 0 at EC50

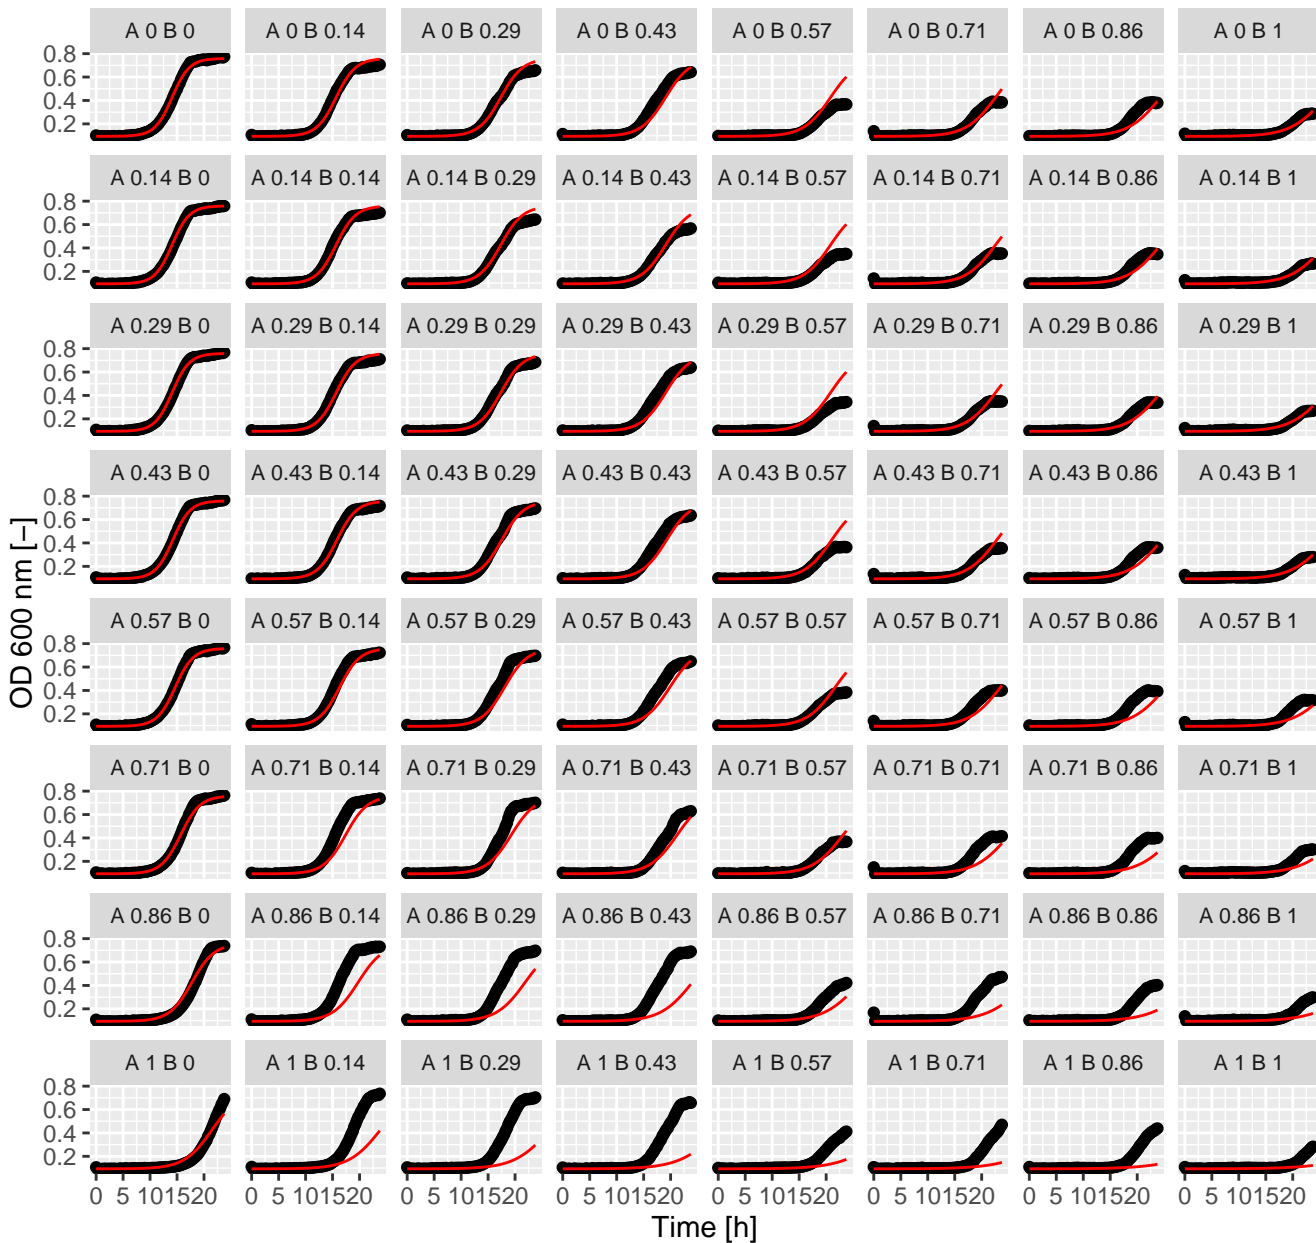

AmB.Ter (= Ax.Bx) full GPDI  
Int\_AB = 1.01 and Int\_BA = 0.03 at EC50

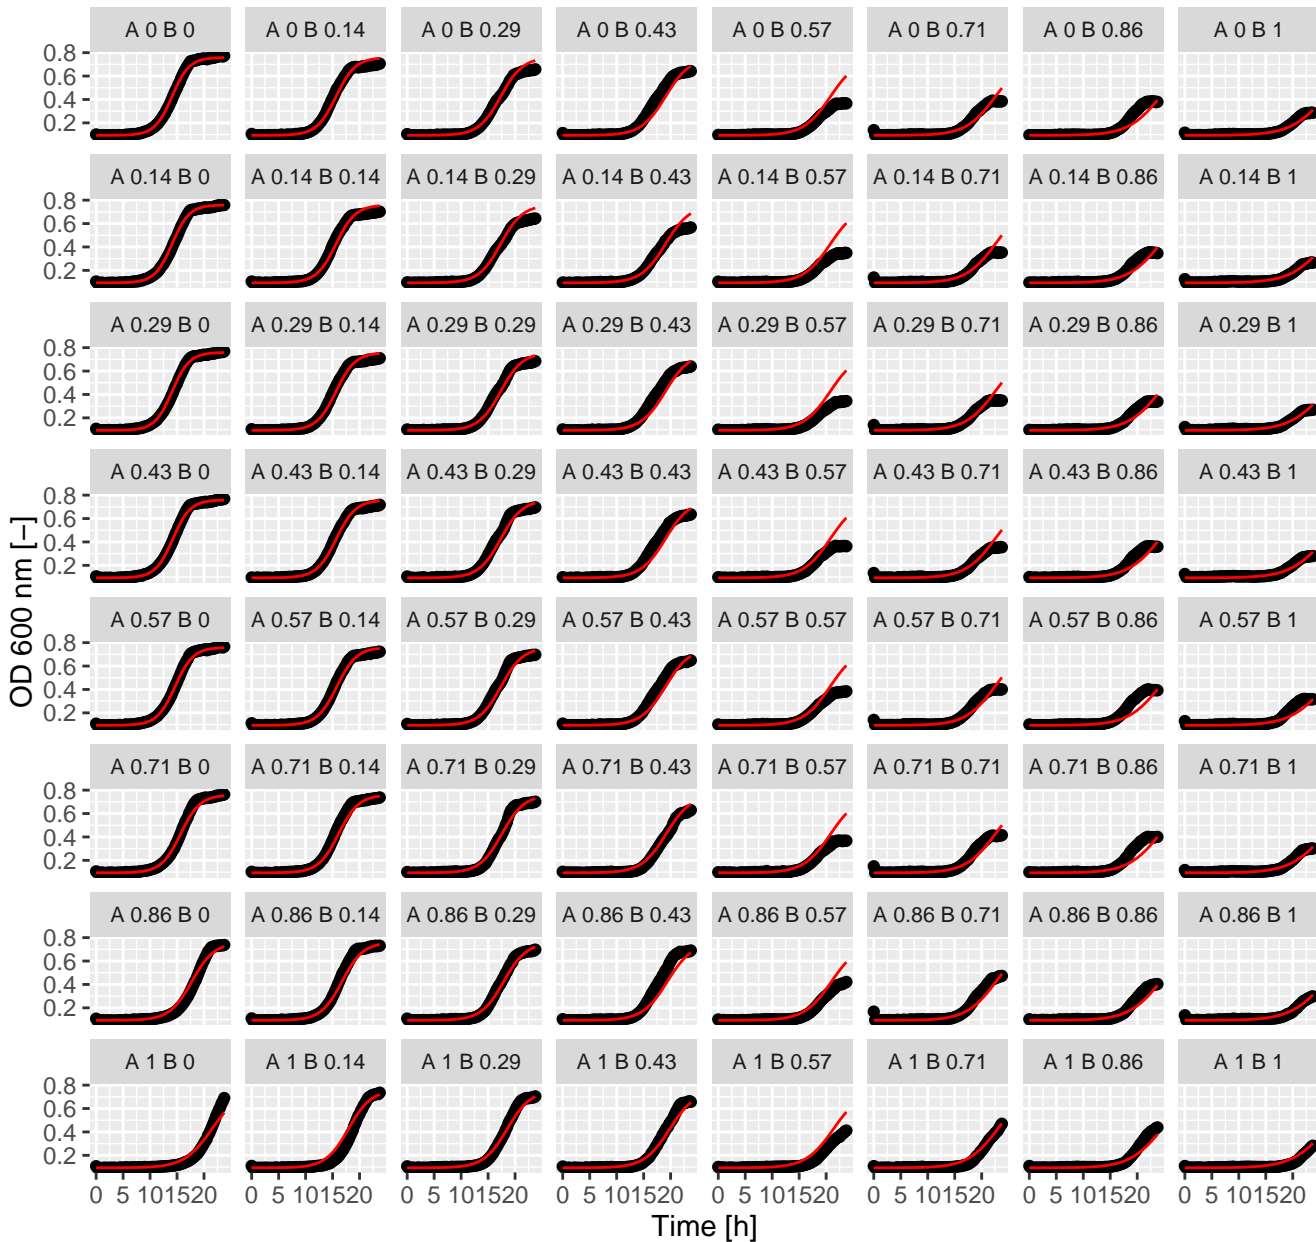

AmB.Tac (= Ax.Bx) exp. additivity (BI)  
Int\_AB = 0 and Int\_BA = 0 at EC50

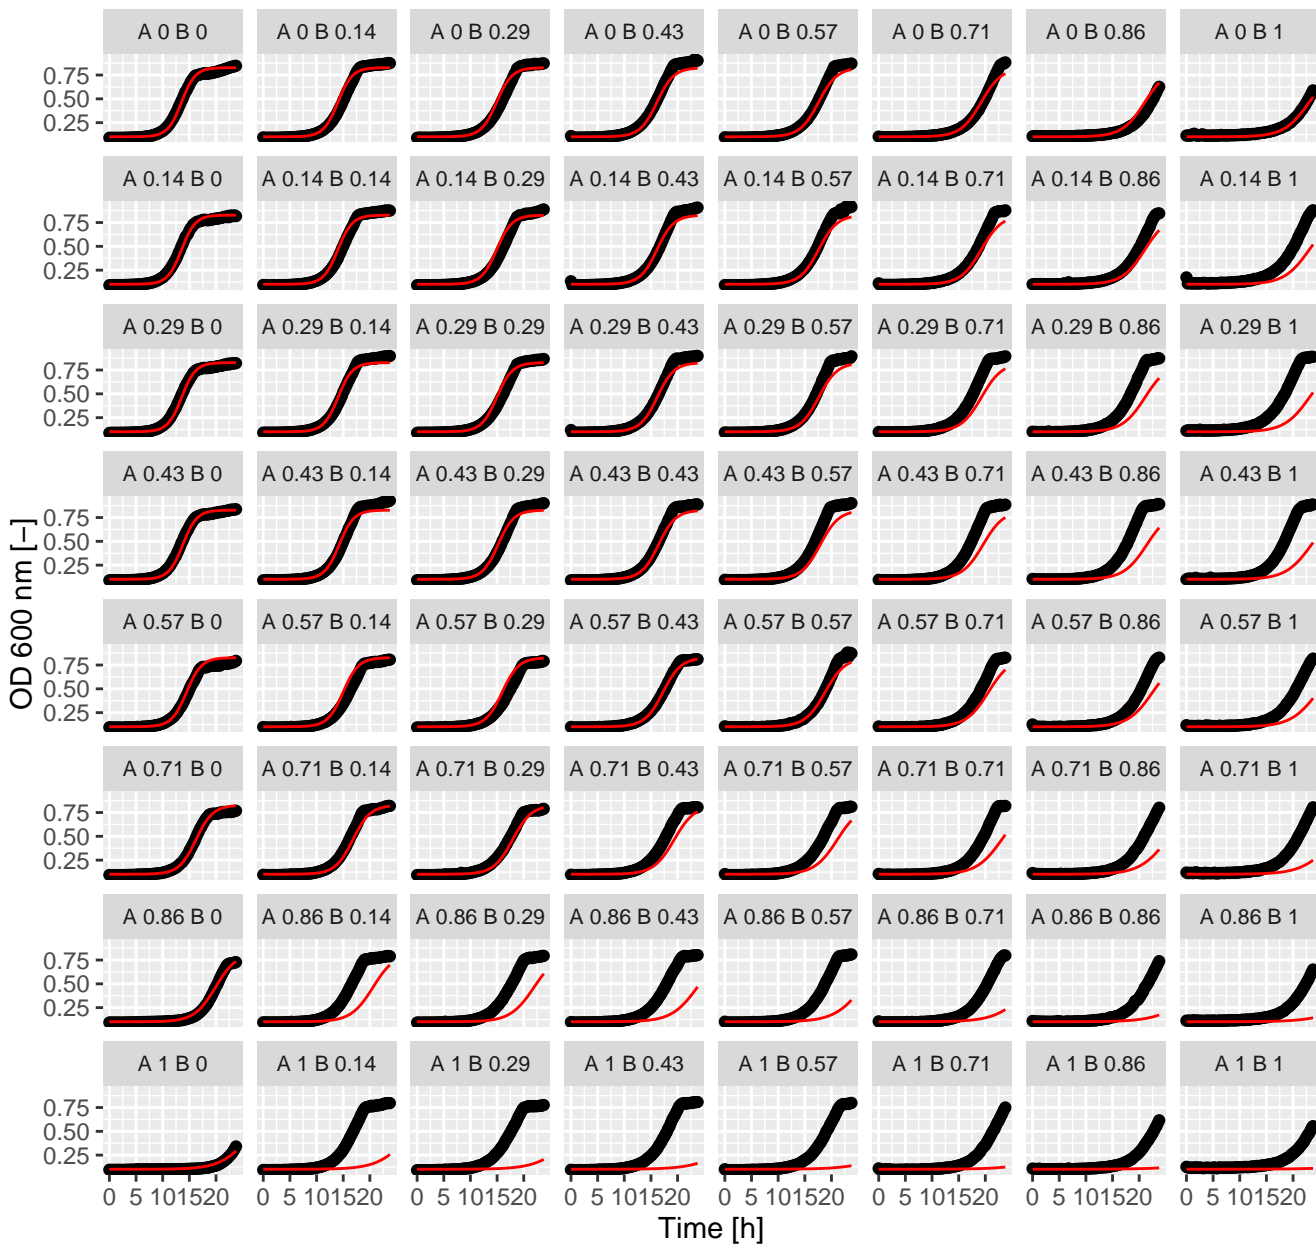

AmB.Tac (= Ax.Bx) full GPDI  
Int\_AB = 0.4 and Int\_BA = 0.29 at EC50

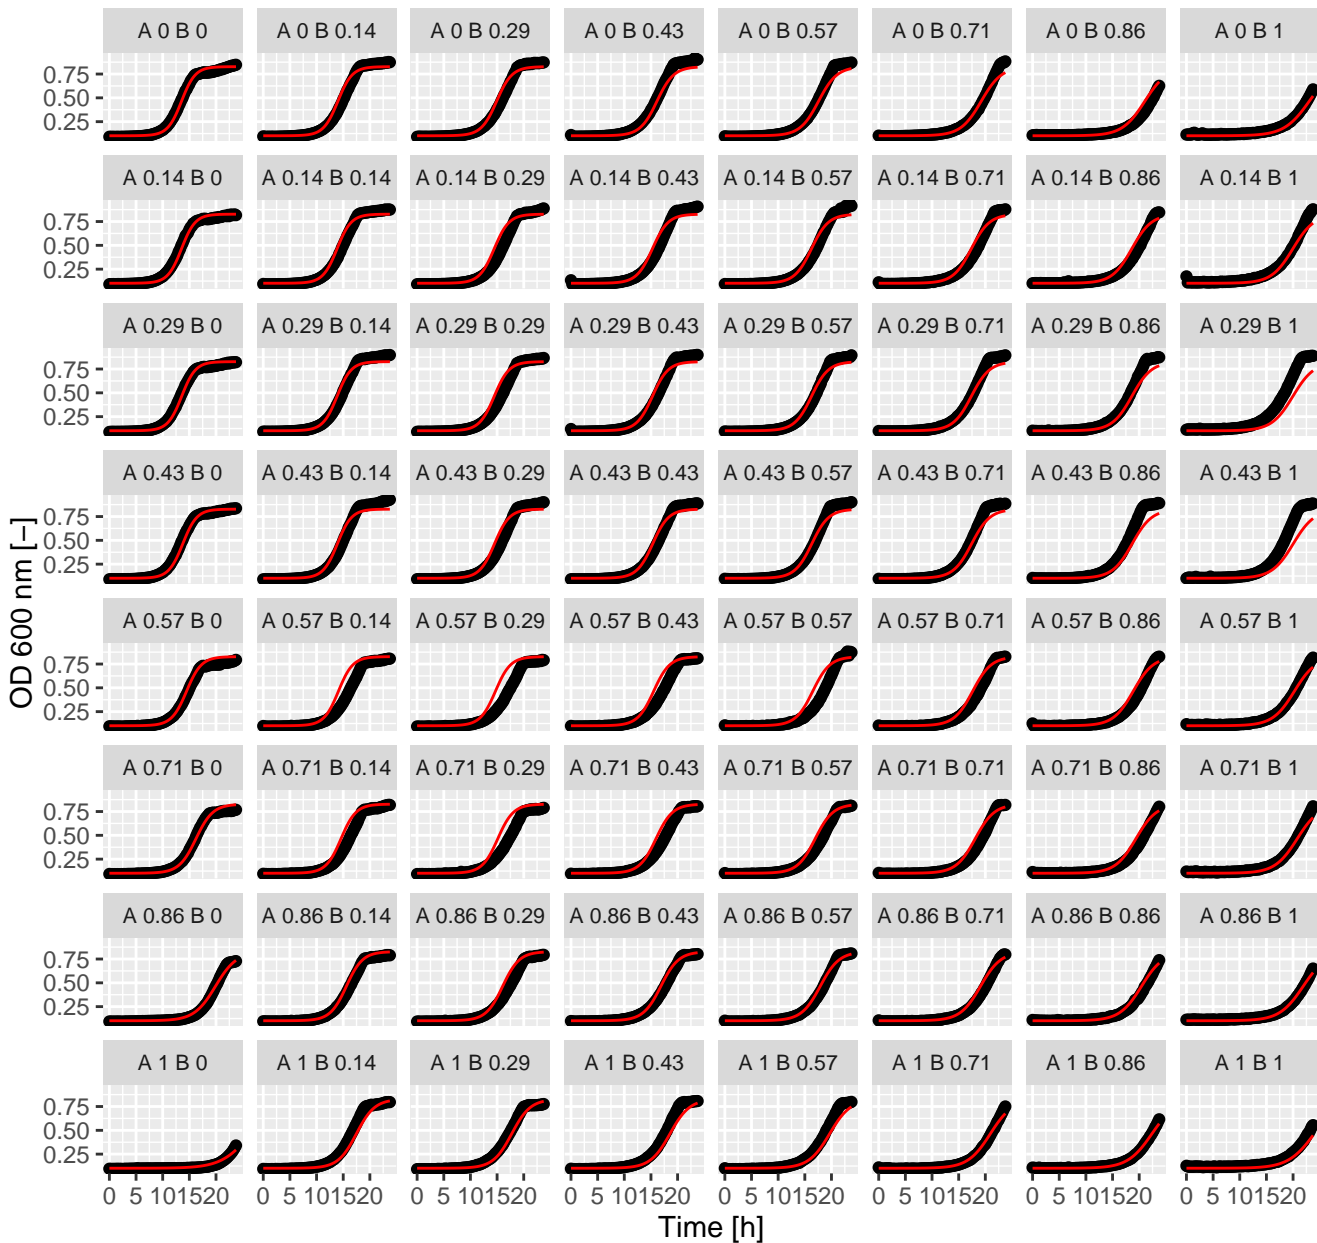



AmB.Sta (= Ax.Bx) exp. additivity (BI)  
Int\_AB = 0 and Int\_BA = 0 at EC50

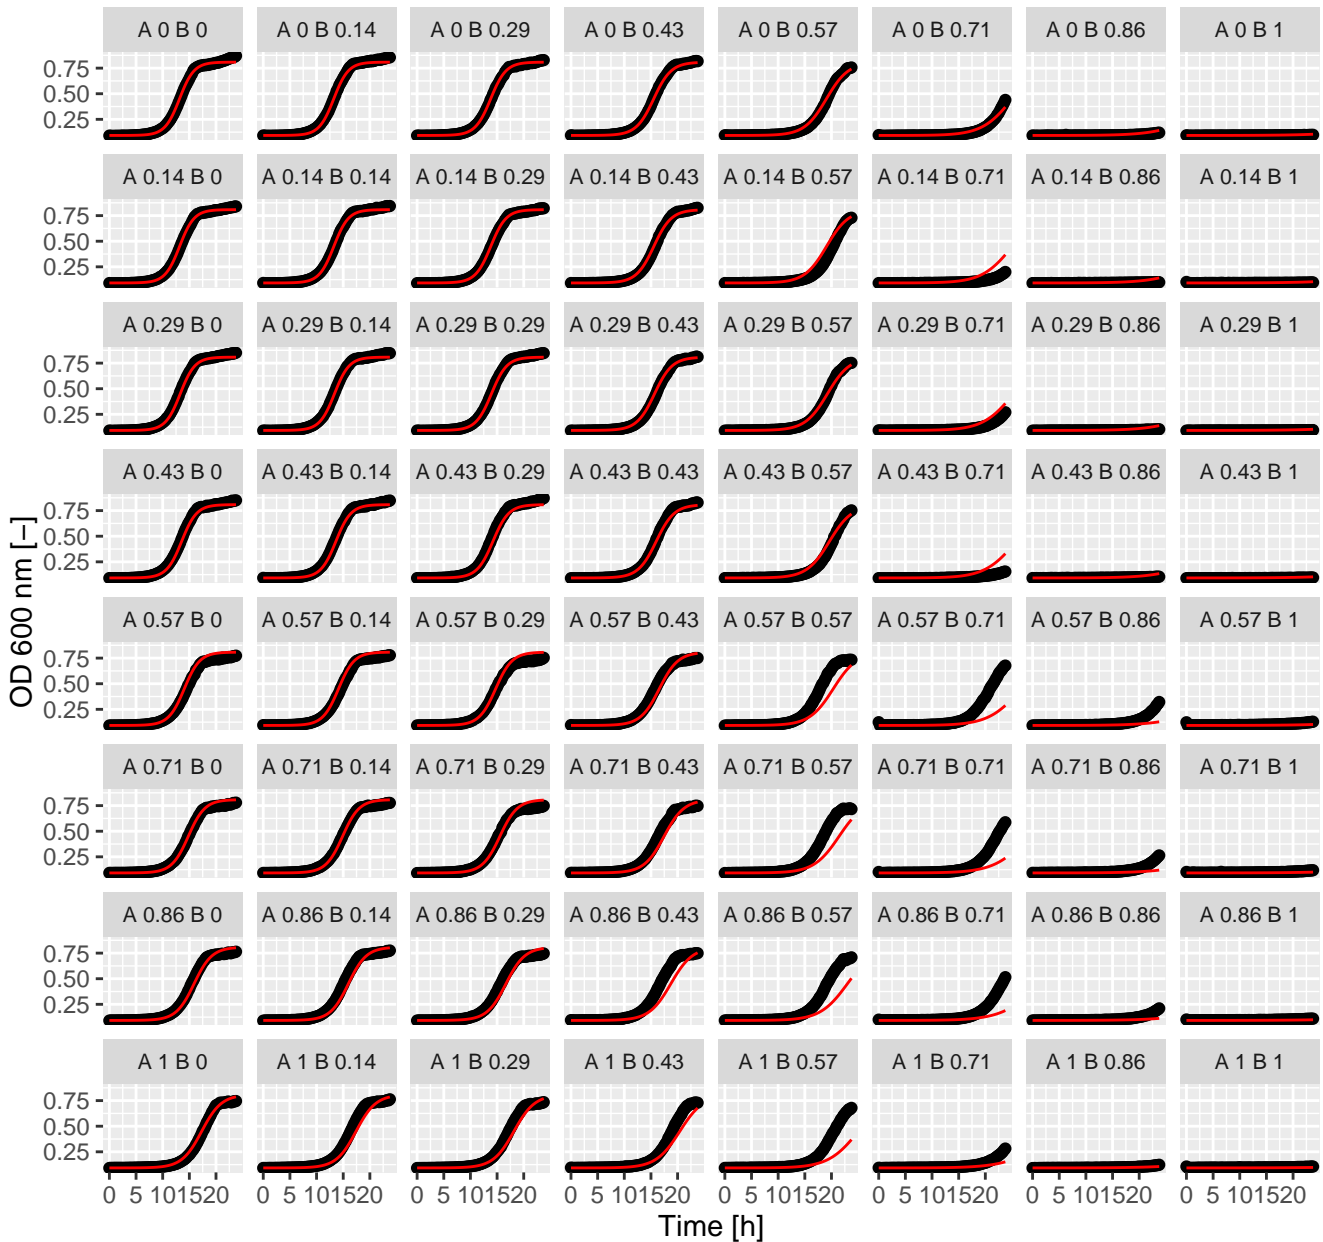

AmB.Sta (= Ax.Bx) full GPDI  
Int\_AB = 0.26 and Int\_BA = 0.16 at EC50

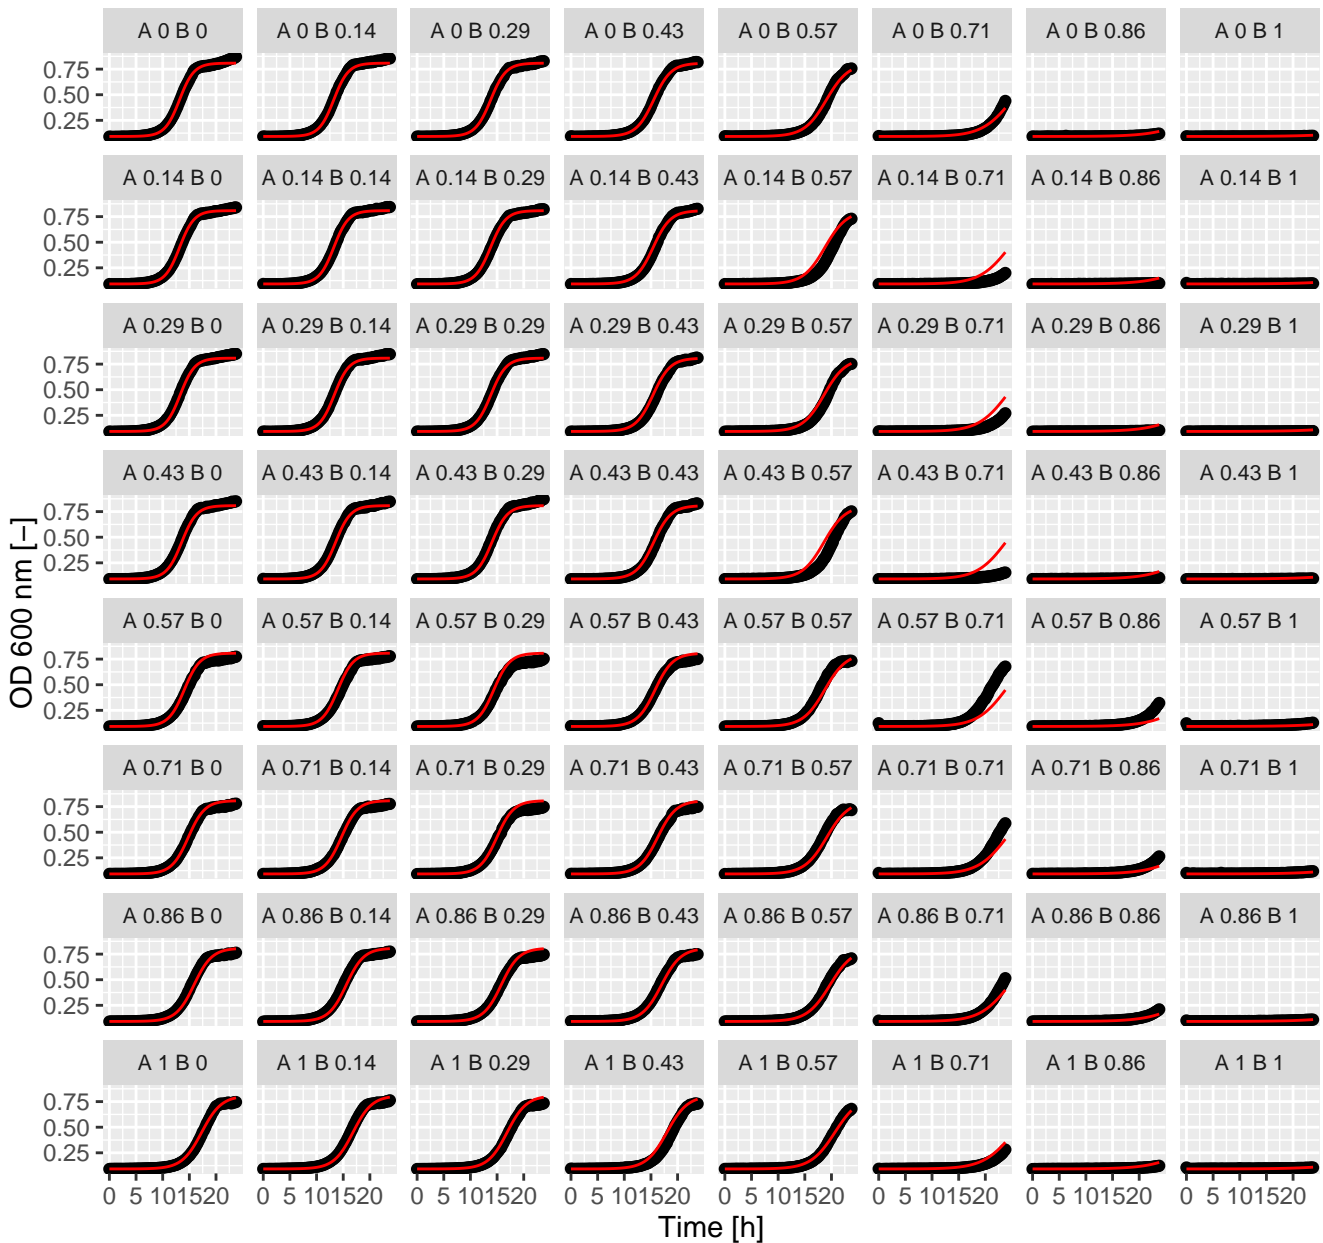

AmB.Pen (= Ax.Bx) exp. additivity (BI)  
Int\_AB = 0 and Int\_BA = 0 at EC50

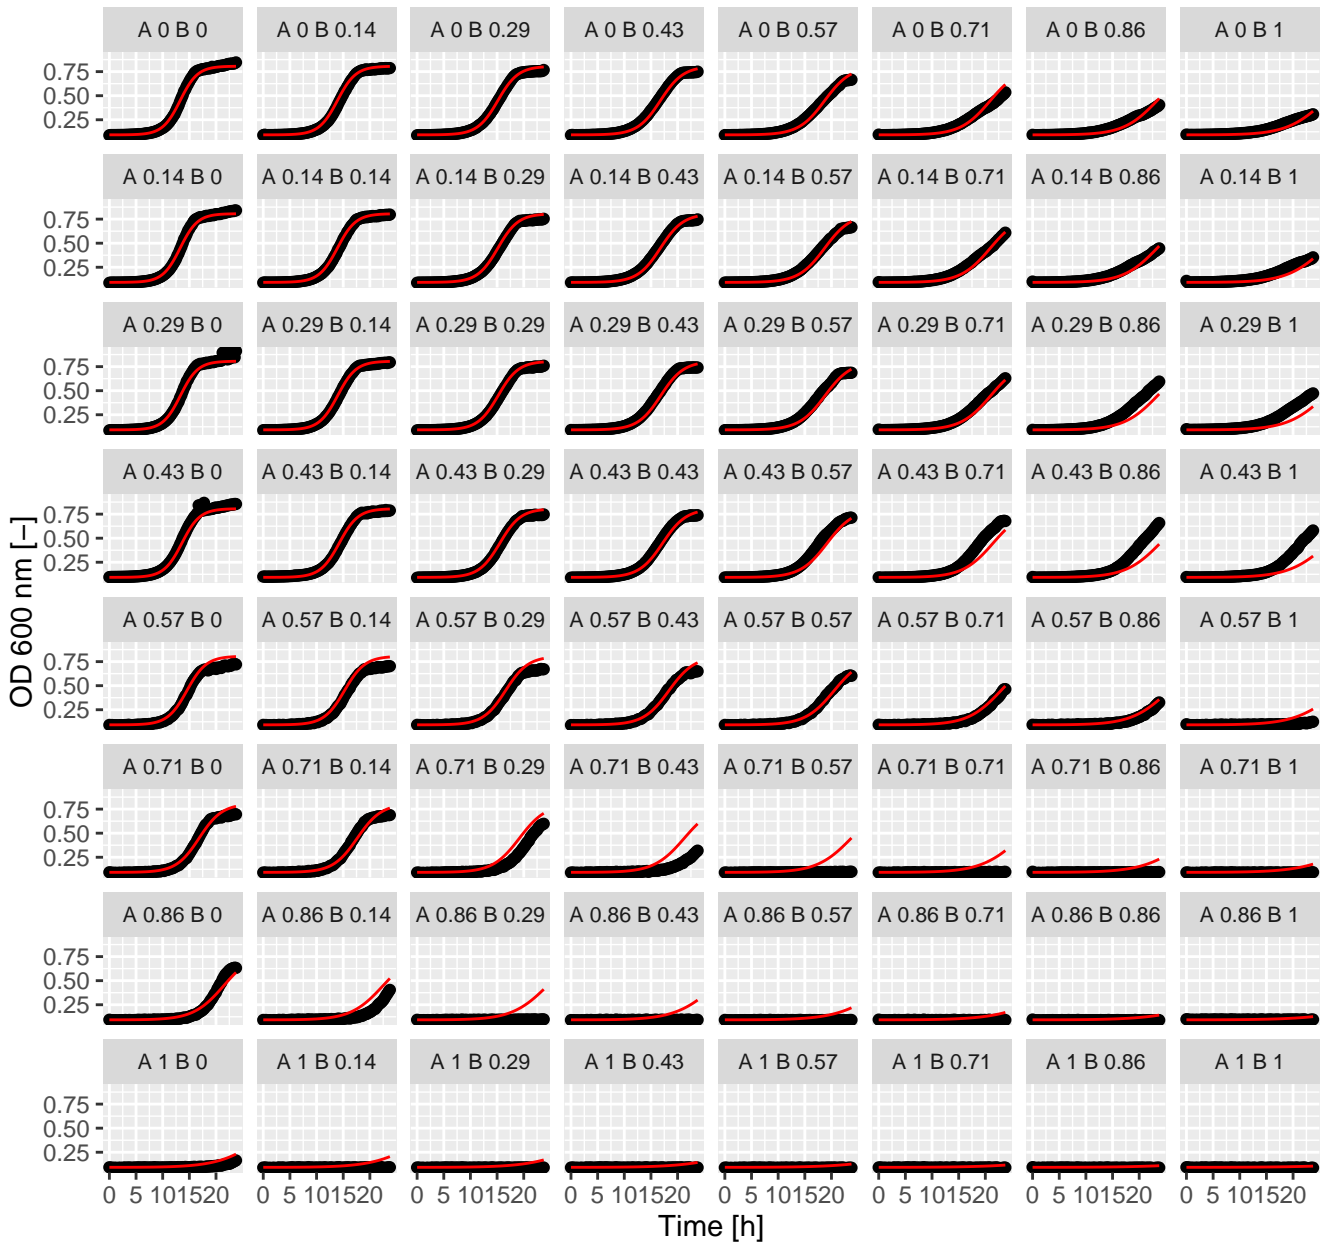

AmB.Pen (= Ax.Bx) full GPDI  
Int\_AB = -0.29 and Int\_BA = 0.85 at EC50

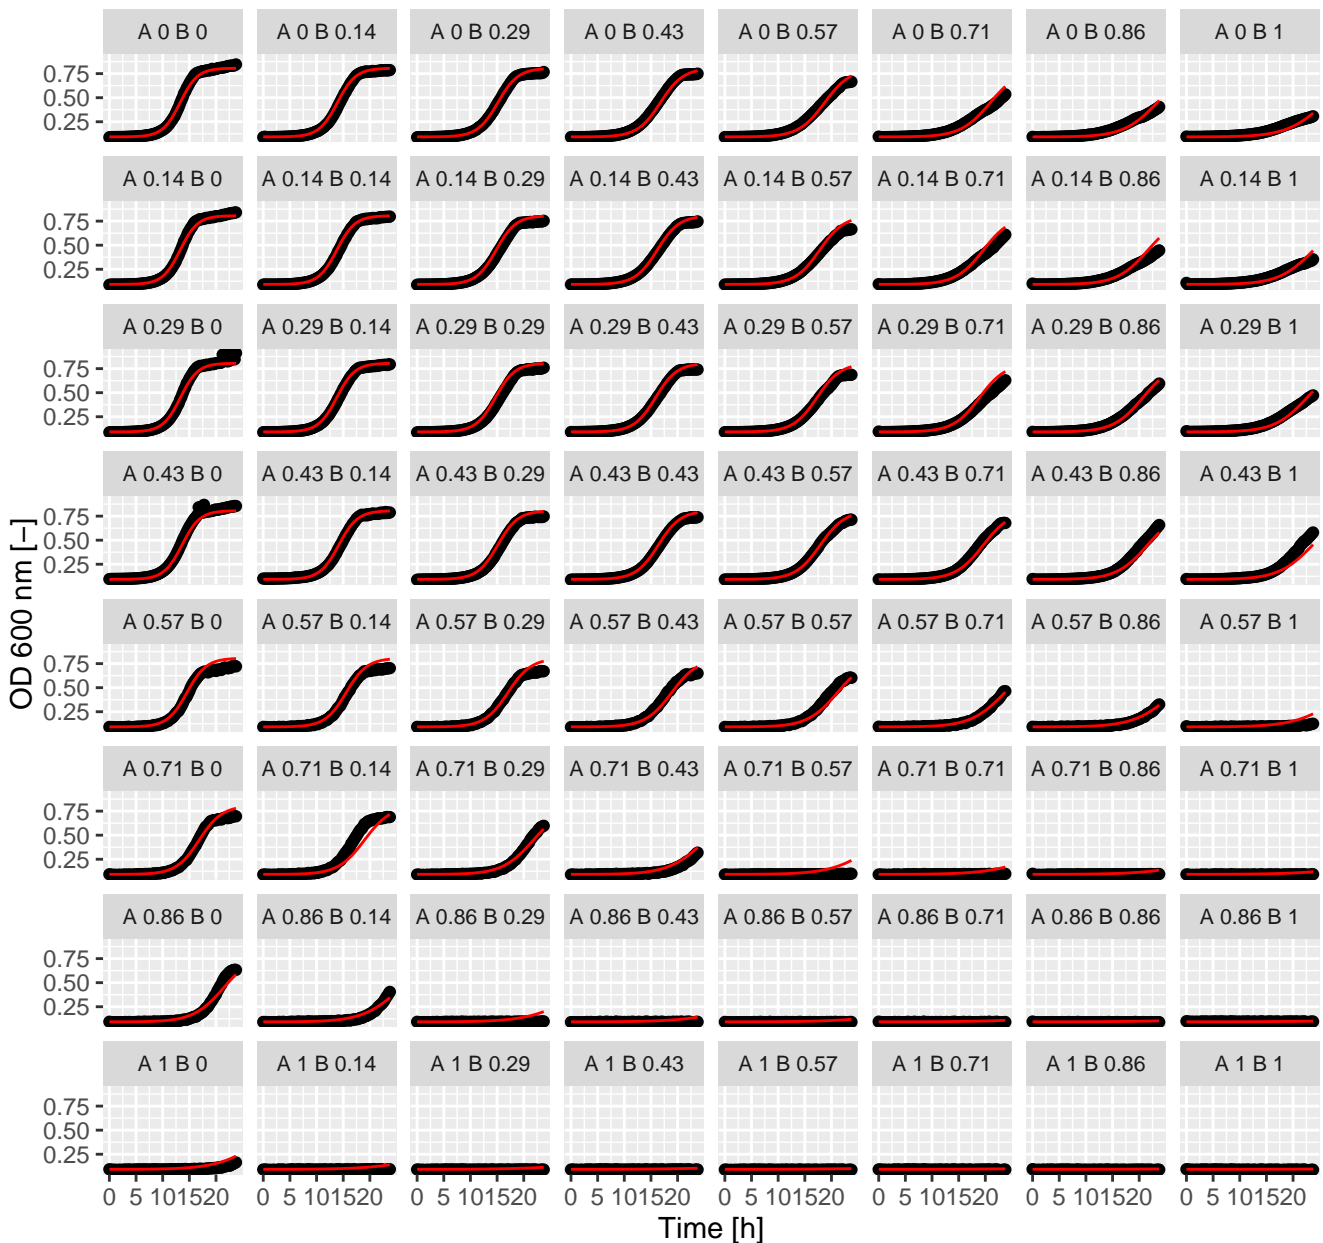

AmB.Ben (= Ax.Bx) exp. additivity (BI)  
Int\_AB = 0 and Int\_BA = 0 at EC50

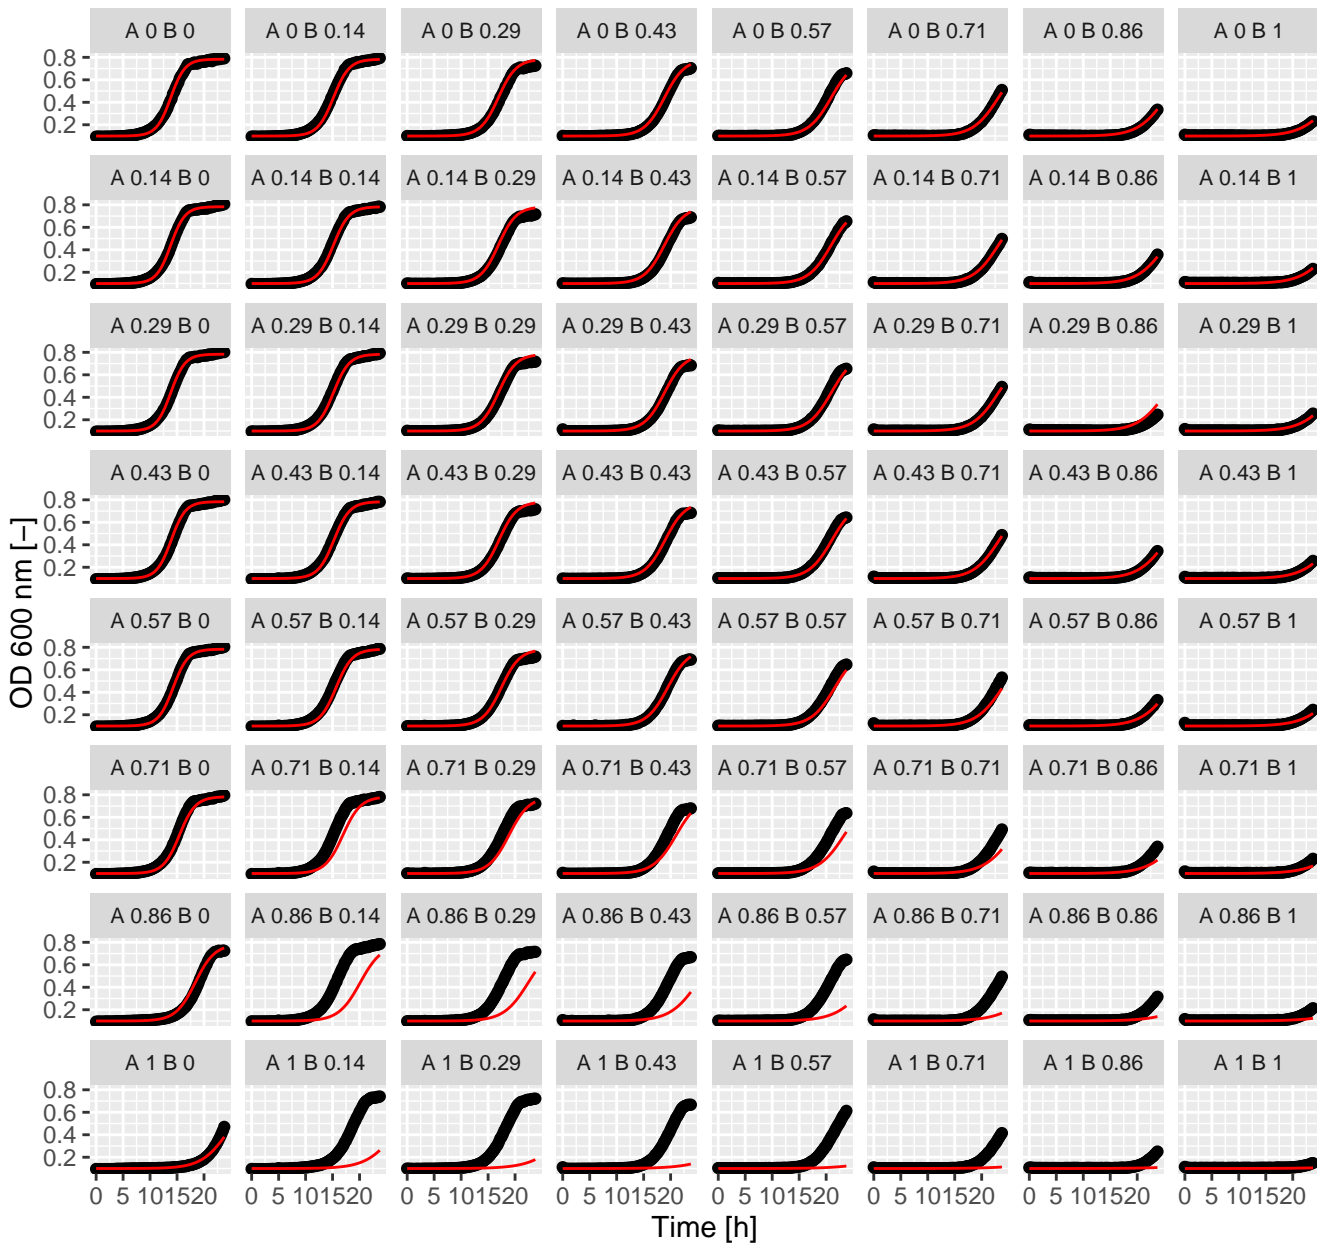

AmB.Ben (= Ax.Bx) full GPDI  
Int\_AB = 0.78 and Int\_BA = -0.02 at EC50

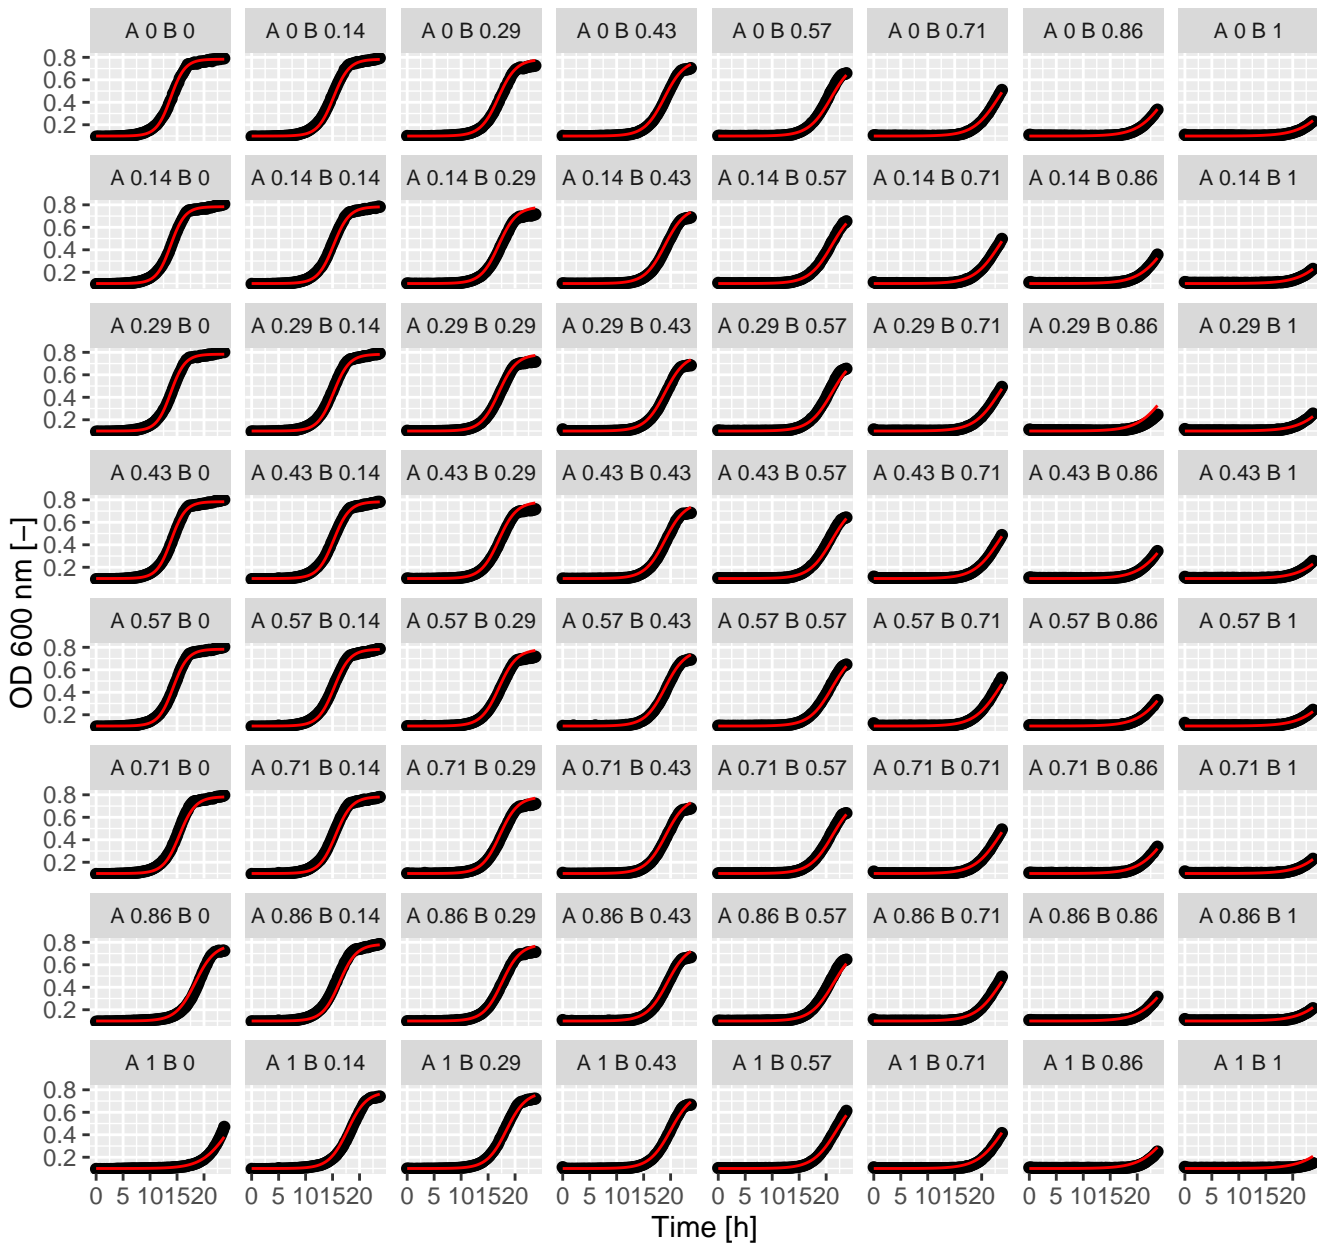

AmB.AmB (= Ax.Bx) exp. additivity (BI)  
Int\_AB = 0 and Int\_BA = 0 at EC50

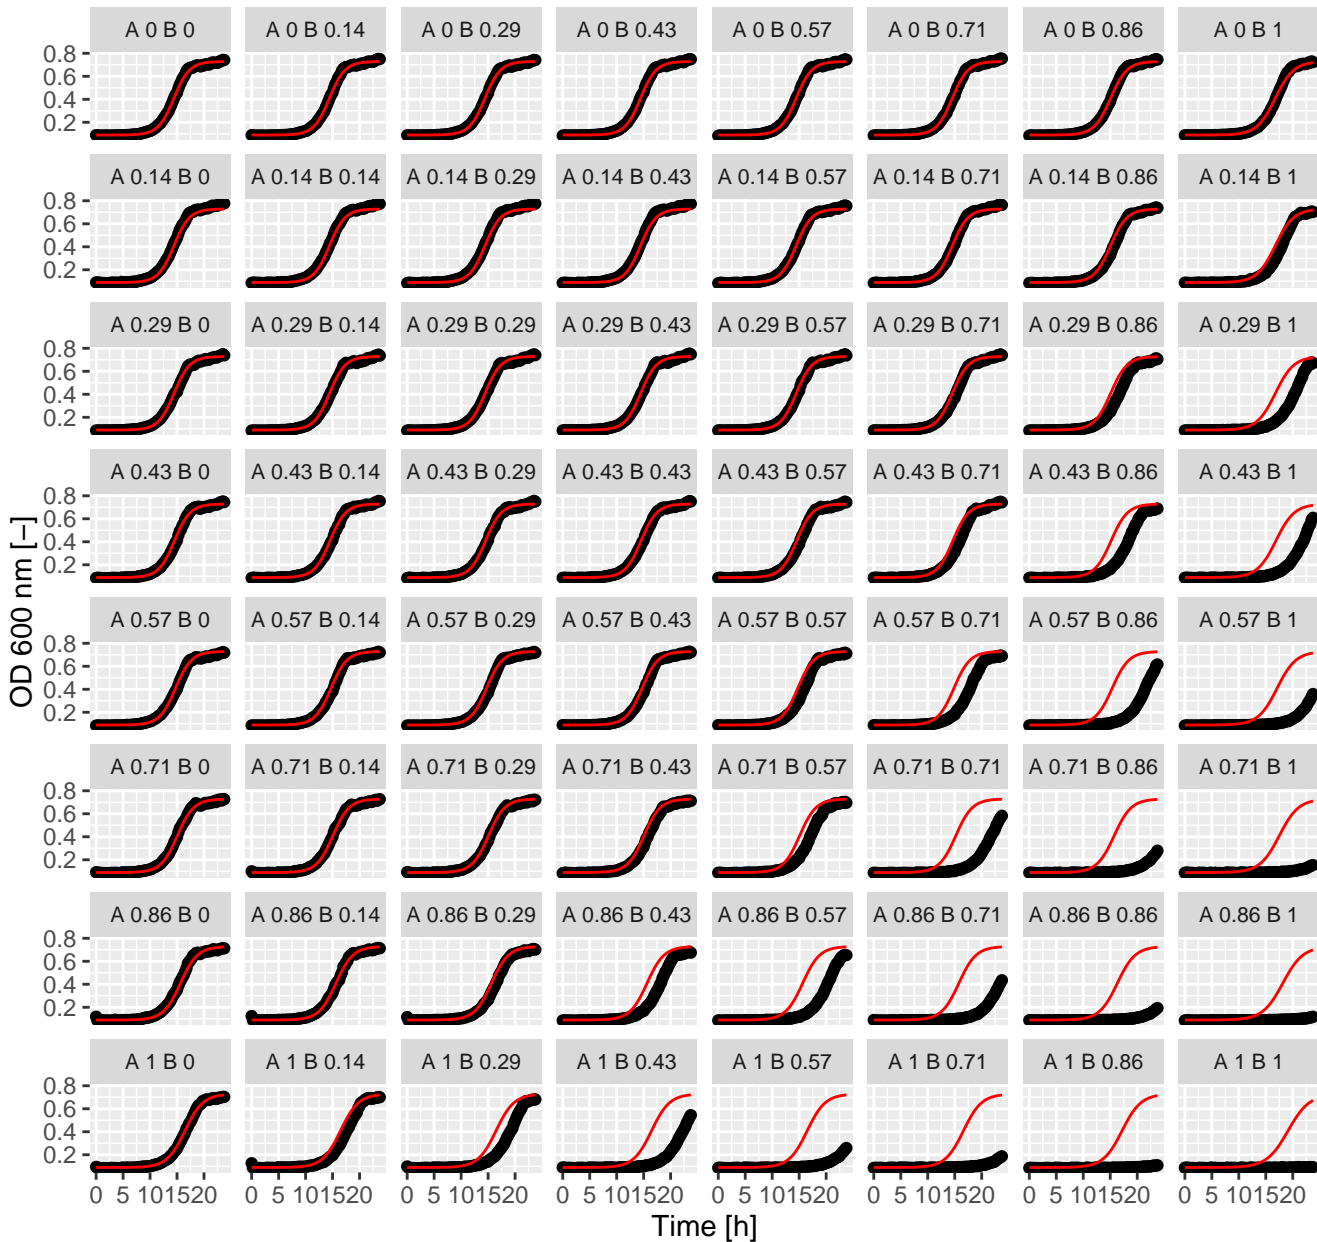

AmB.AmB (= Ax.Bx) full GPDI  
Int\_AB = -0.56 and Int\_BA = -0.38 at EC50

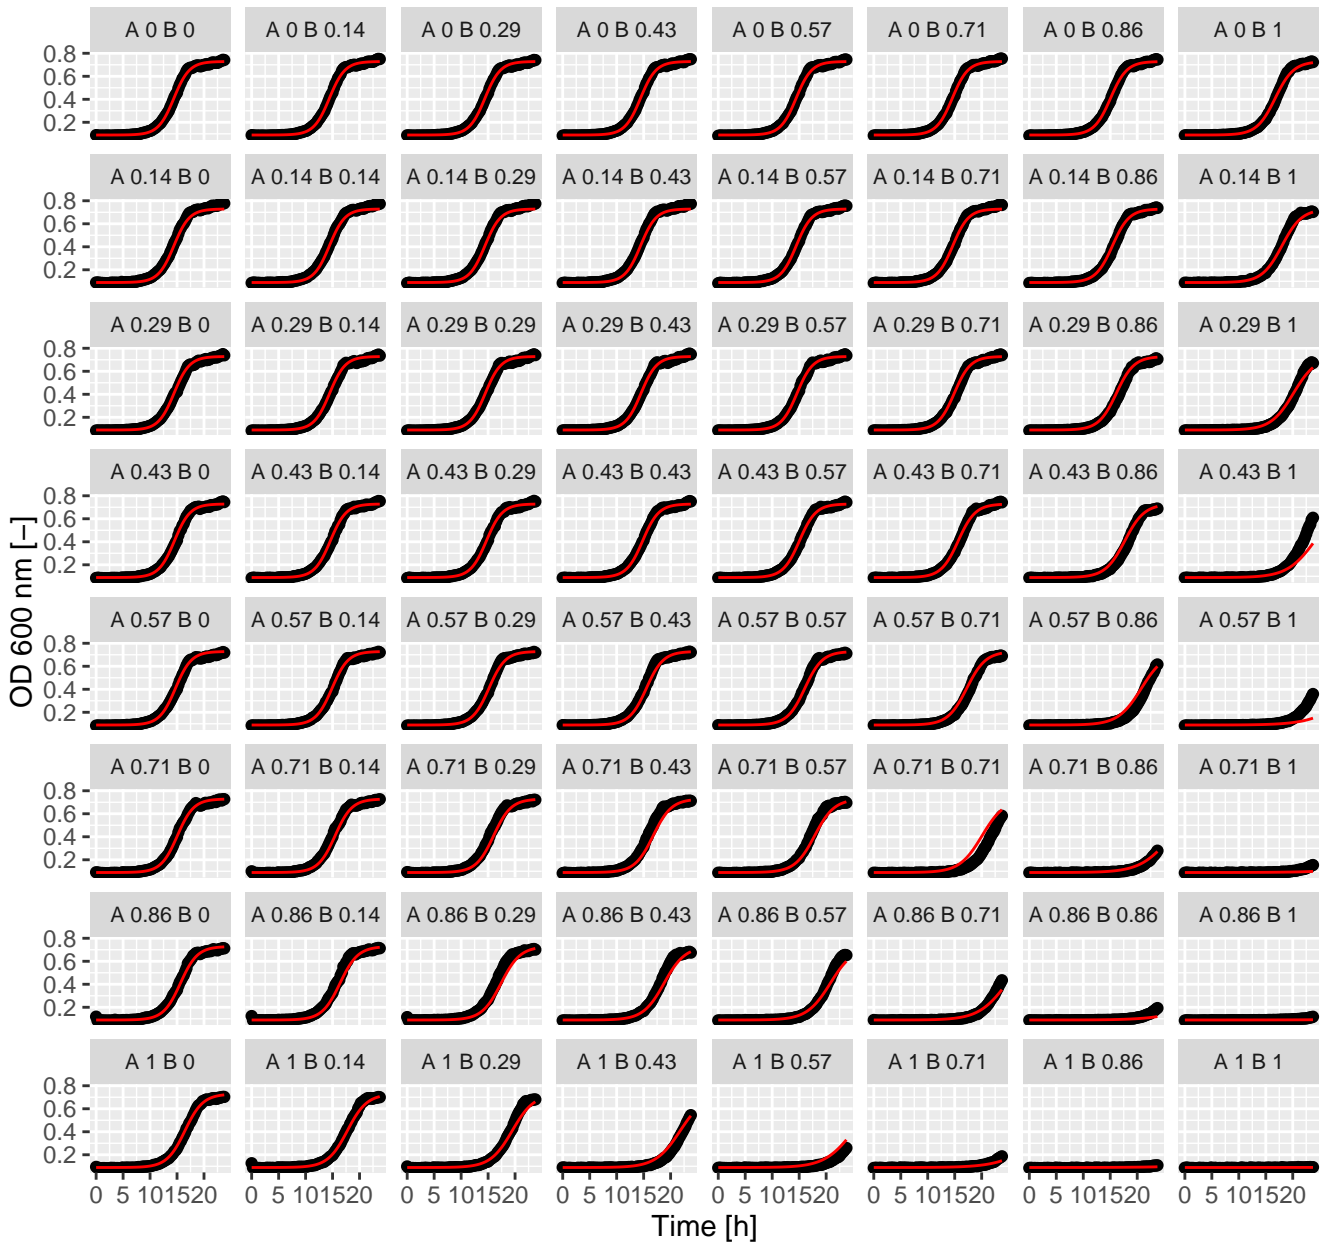



AbA.Wor (= Ax.Bx) exp. additivity (BI)  
 Int\_AB = 0 and Int\_BA = 0 at EC50

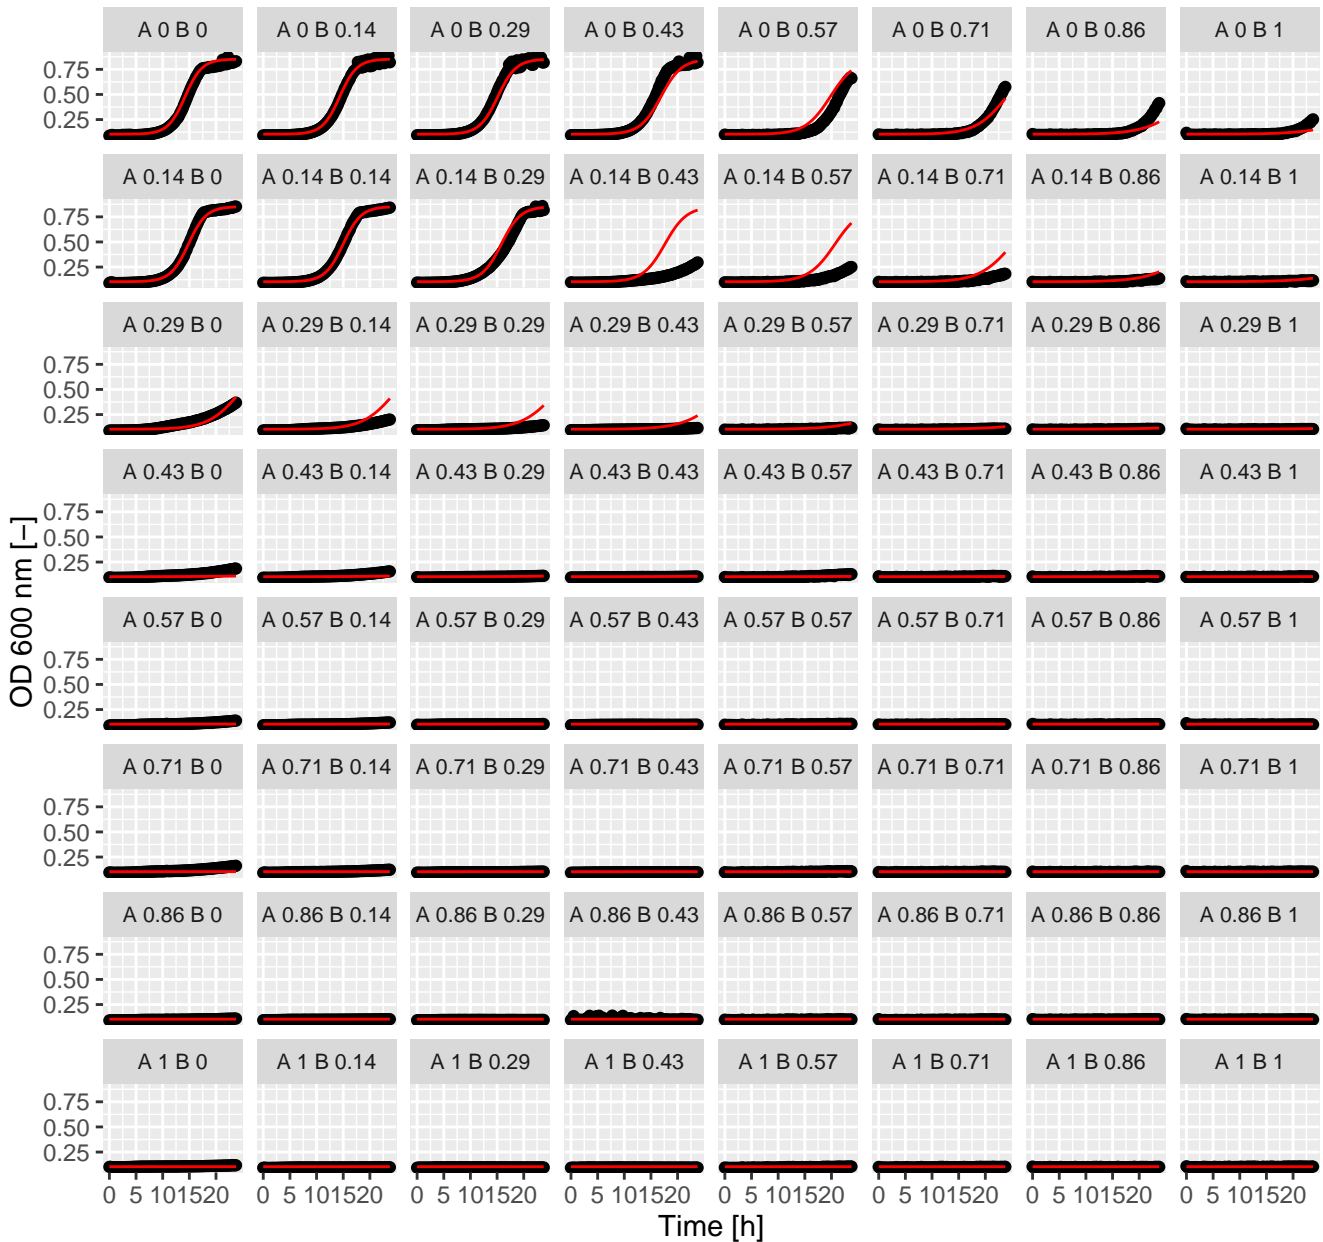

AbA.Wor (= Ax.Bx) full GPDI  
 Int\_AB = -0.39 and Int\_BA = -0.29 at EC50

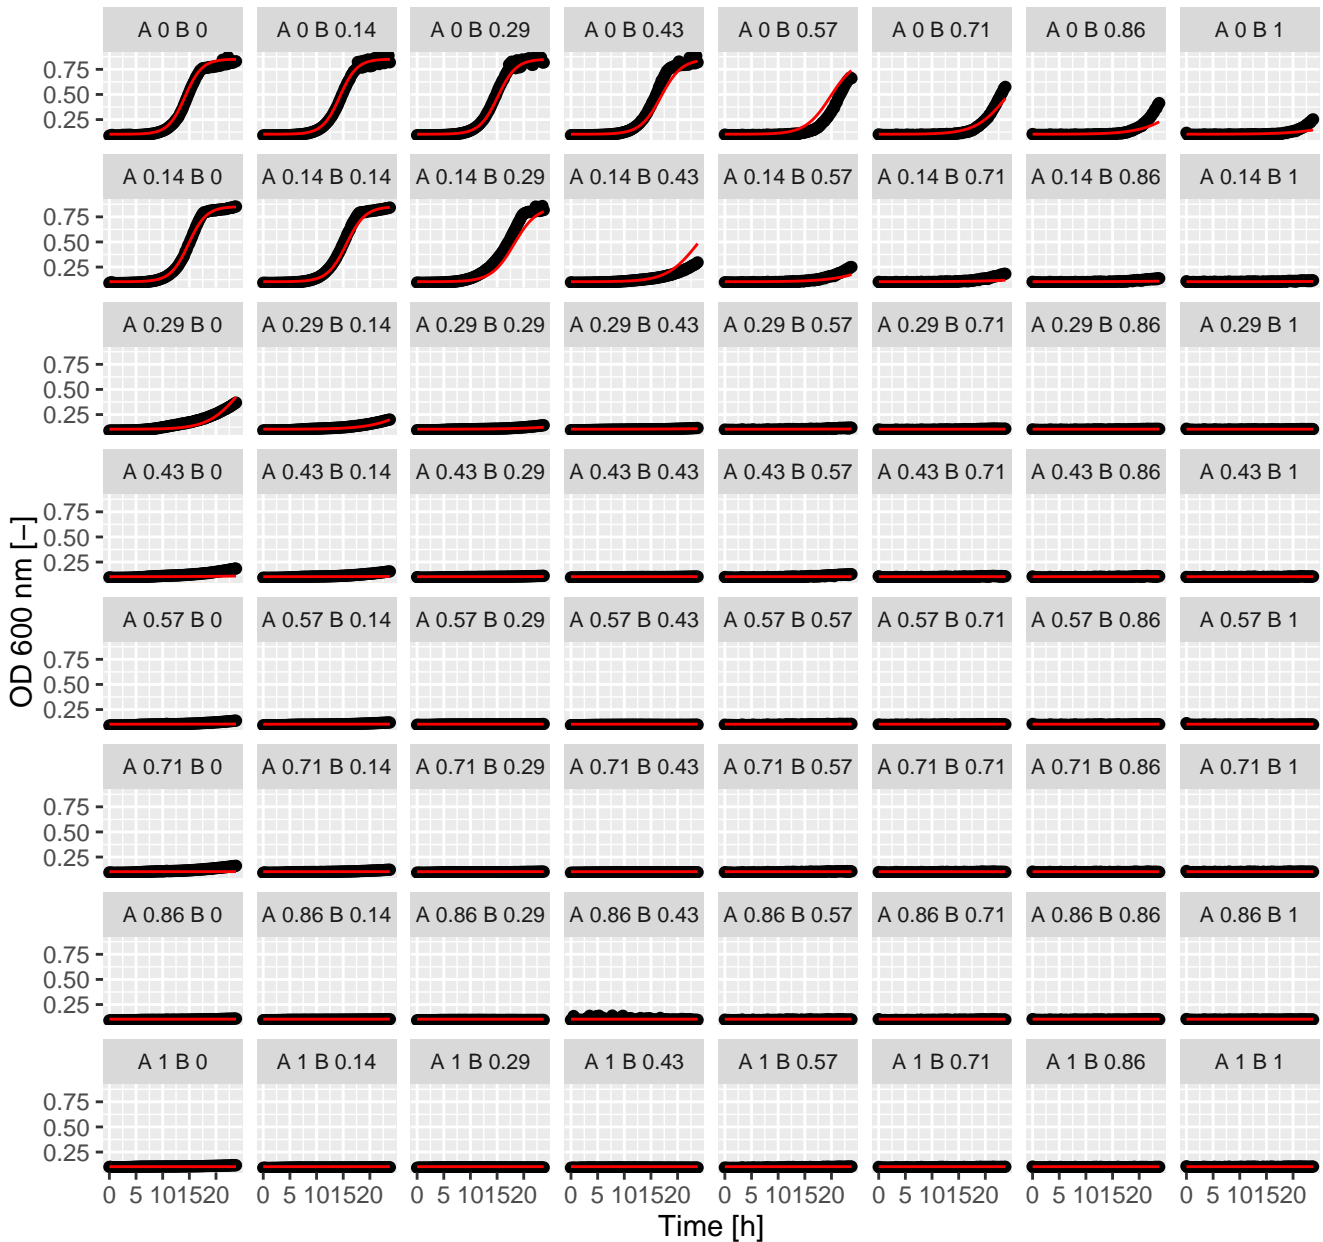

AbA.Lit (= Ax.Bx) exp. additivity (BI)  
Int\_AB = 0 and Int\_BA = 0 at EC50

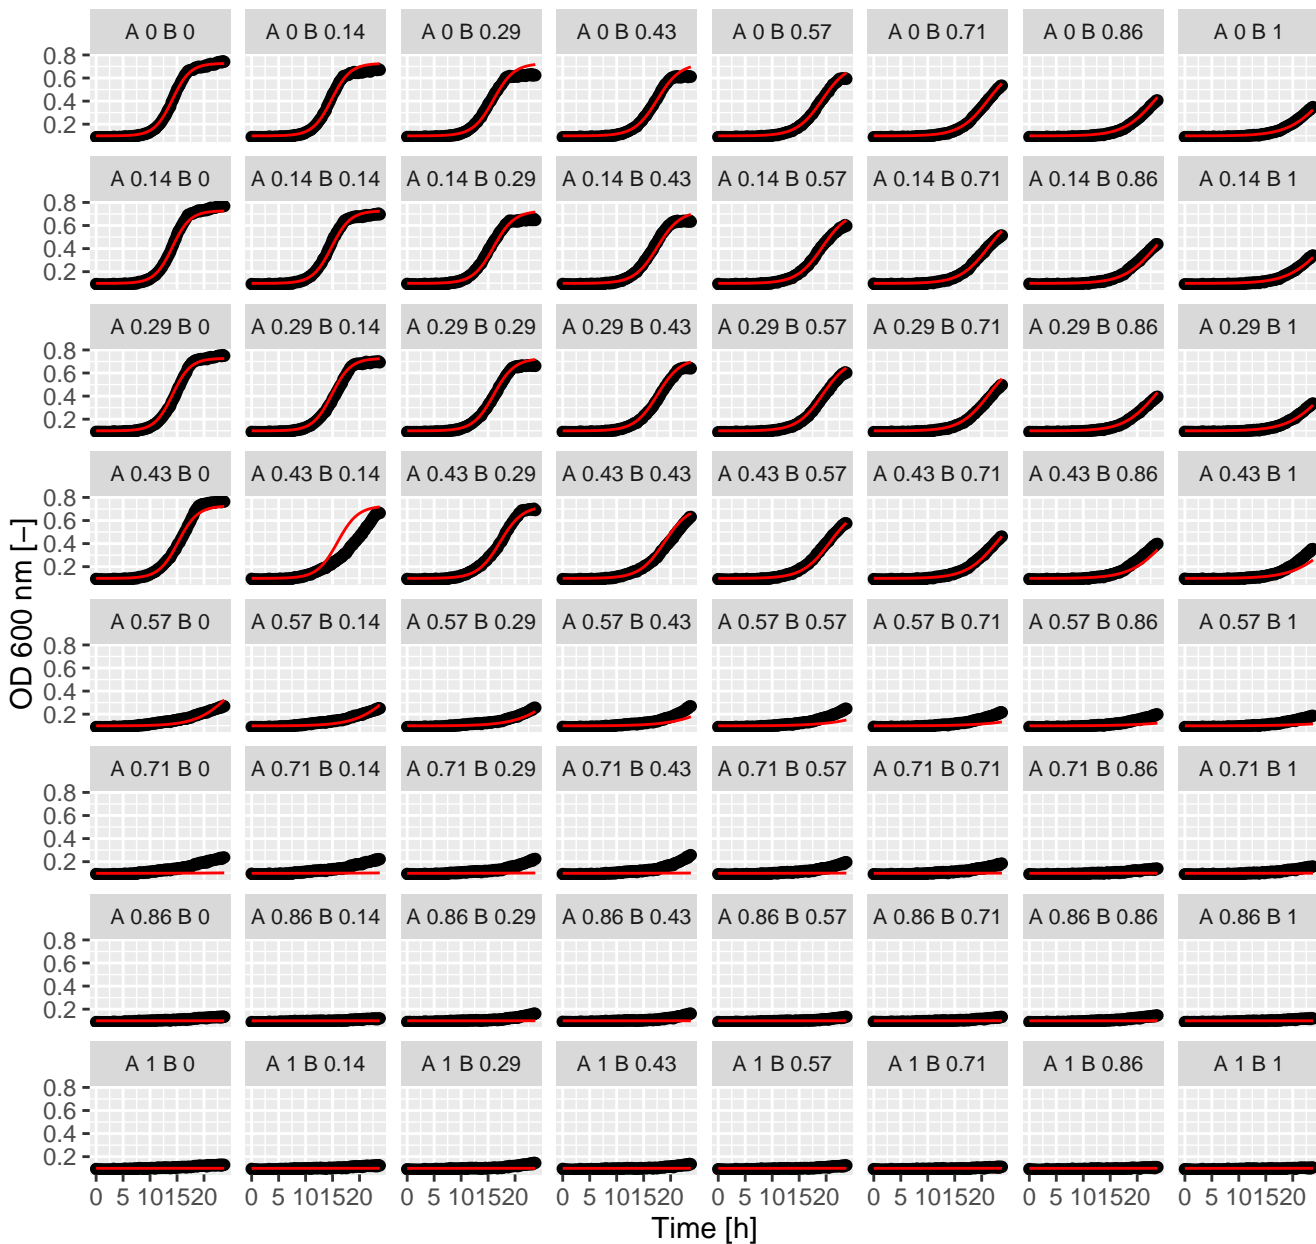

AbA.Lit (= Ax.Bx) full GPDI  
Int\_AB = 0.11 and Int\_BA = -0.03 at EC50

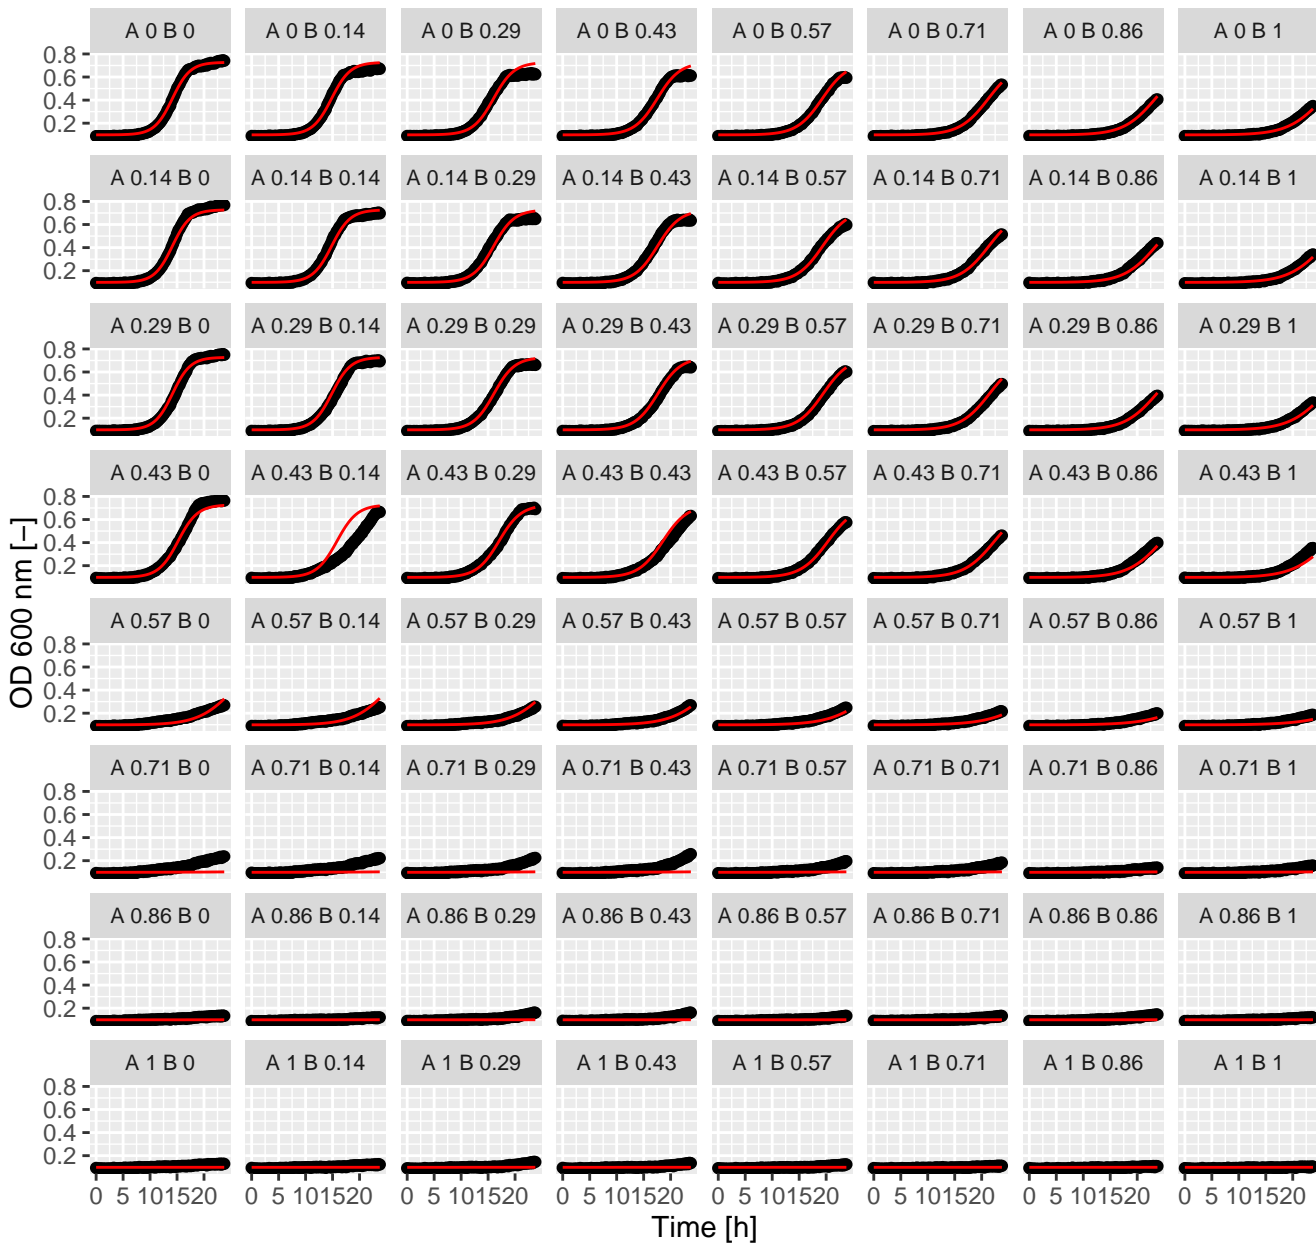

5FU.Ter (= Ax.Bx) exp. additivity (BI)  
Int\_AB = 0 and Int\_BA = 0 at EC50

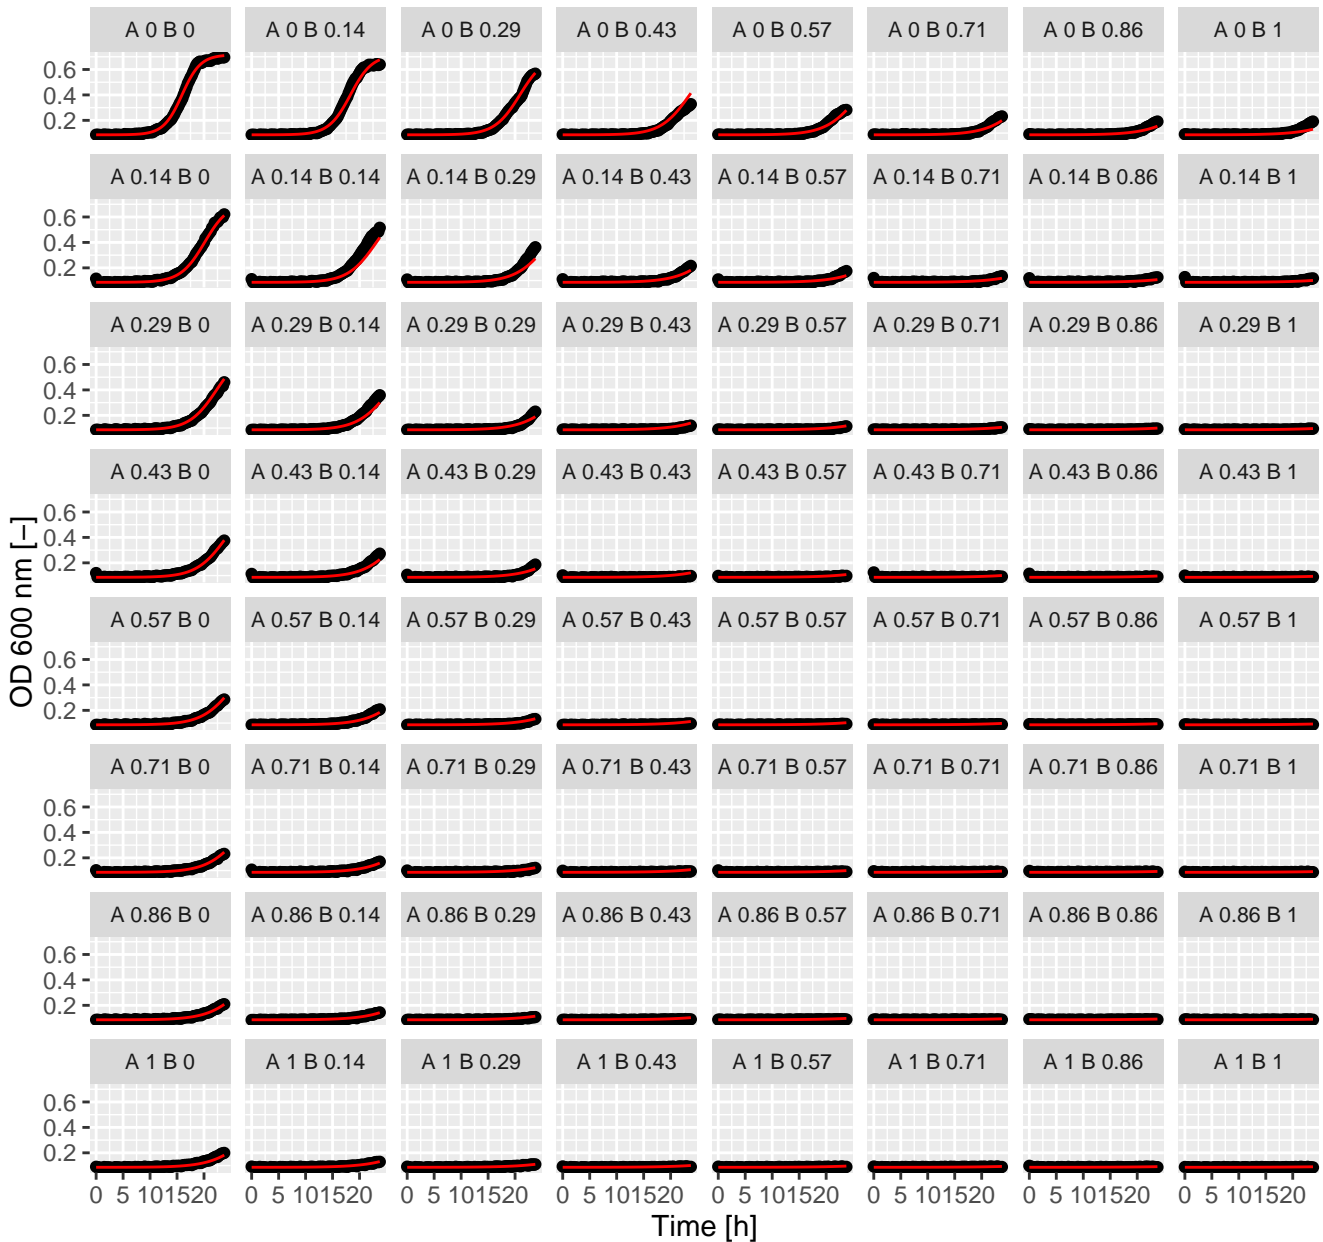

5FU.Ter (= Ax.Bx) full GPDI  
Int\_AB = 0.23 and Int\_BA = 0.04 at EC50

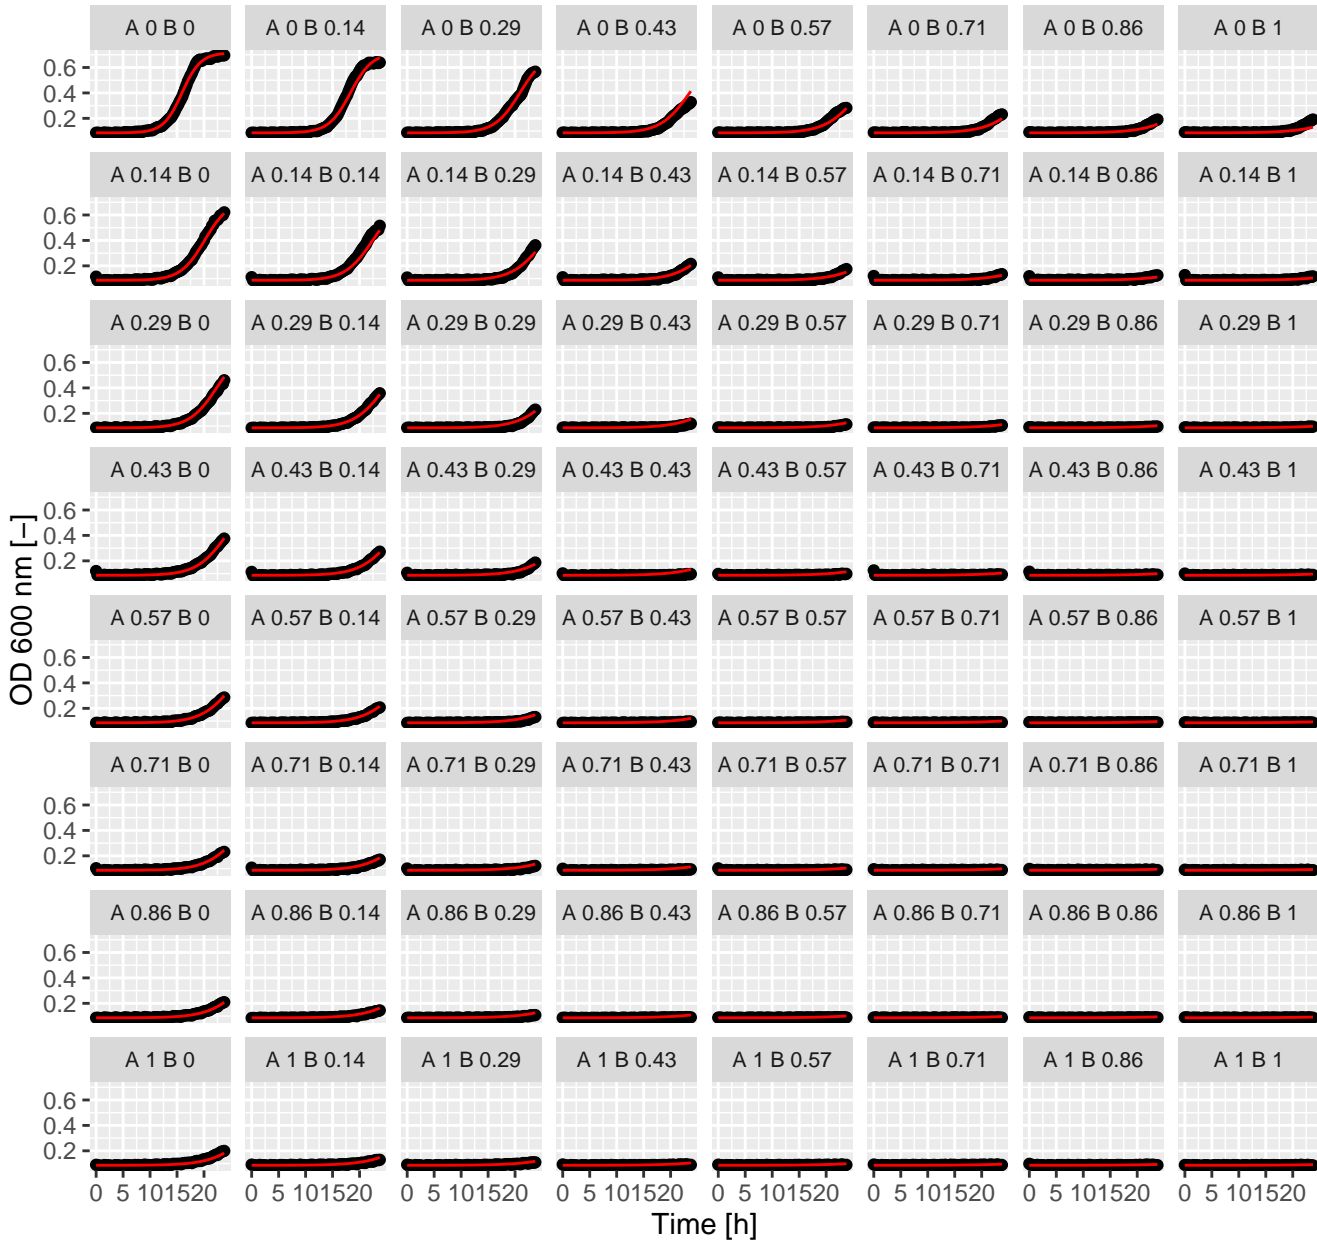

5FU.Tac (= Ax.Bx) exp. additivity (BI)  
Int\_AB = 0 and Int\_BA = 0 at EC50

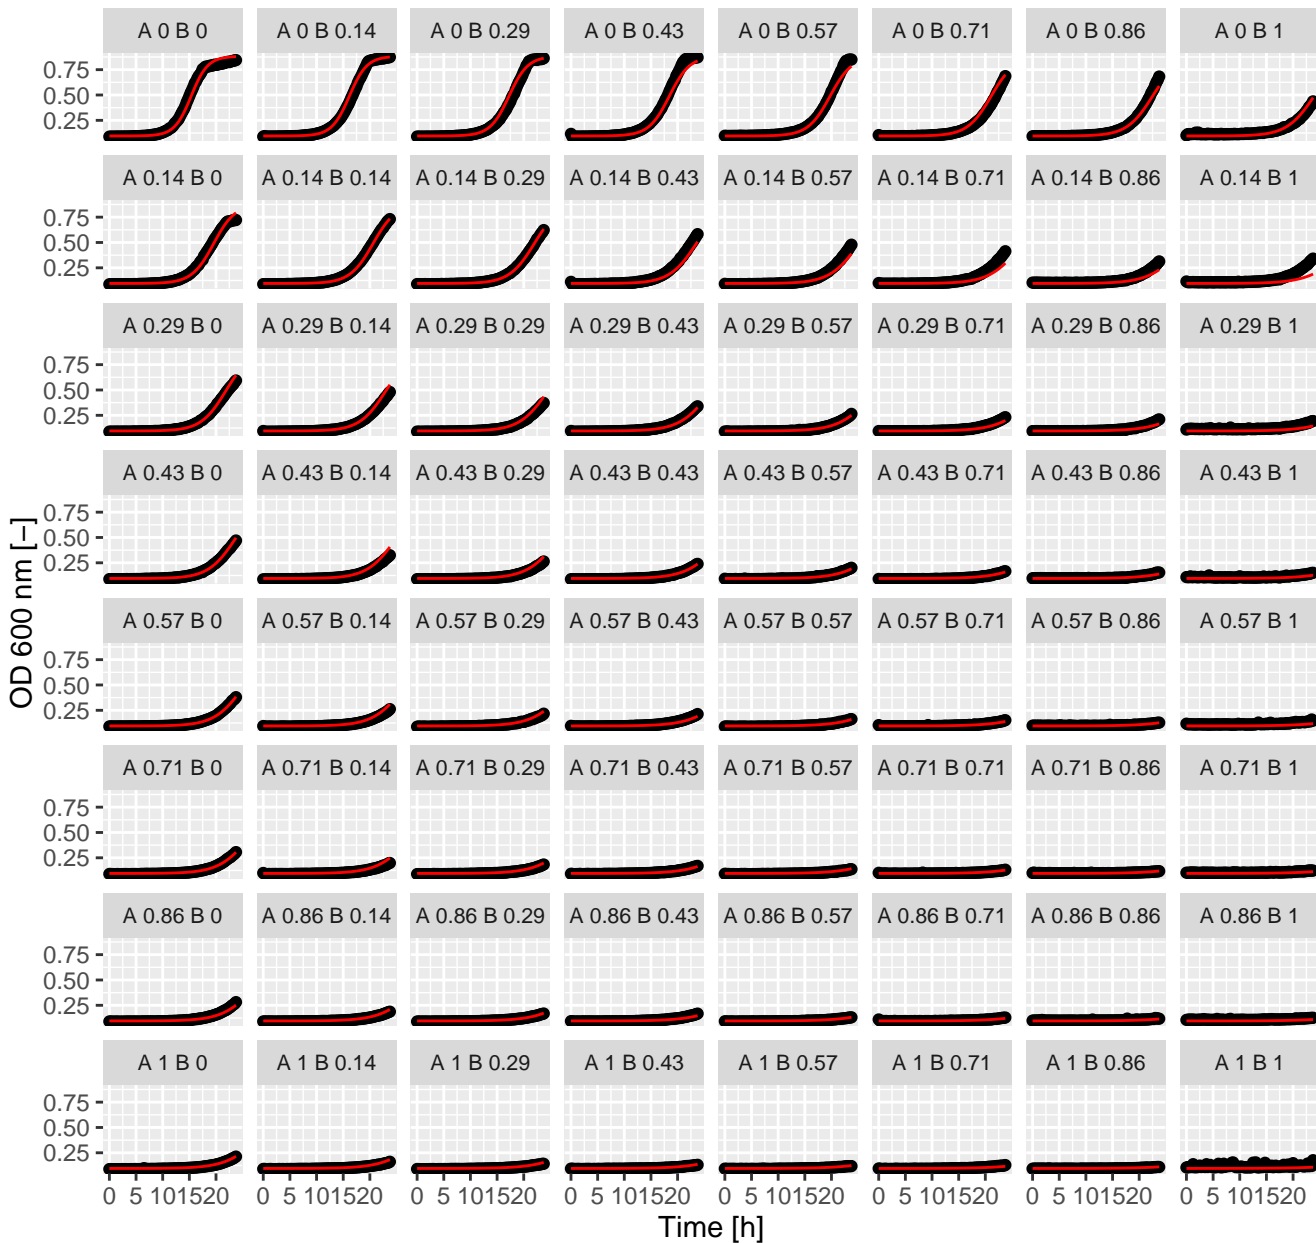

5FU.Tac (= Ax.Bx) full GPDI  
Int\_AB = 0.44 and Int\_BA = 0 at EC50

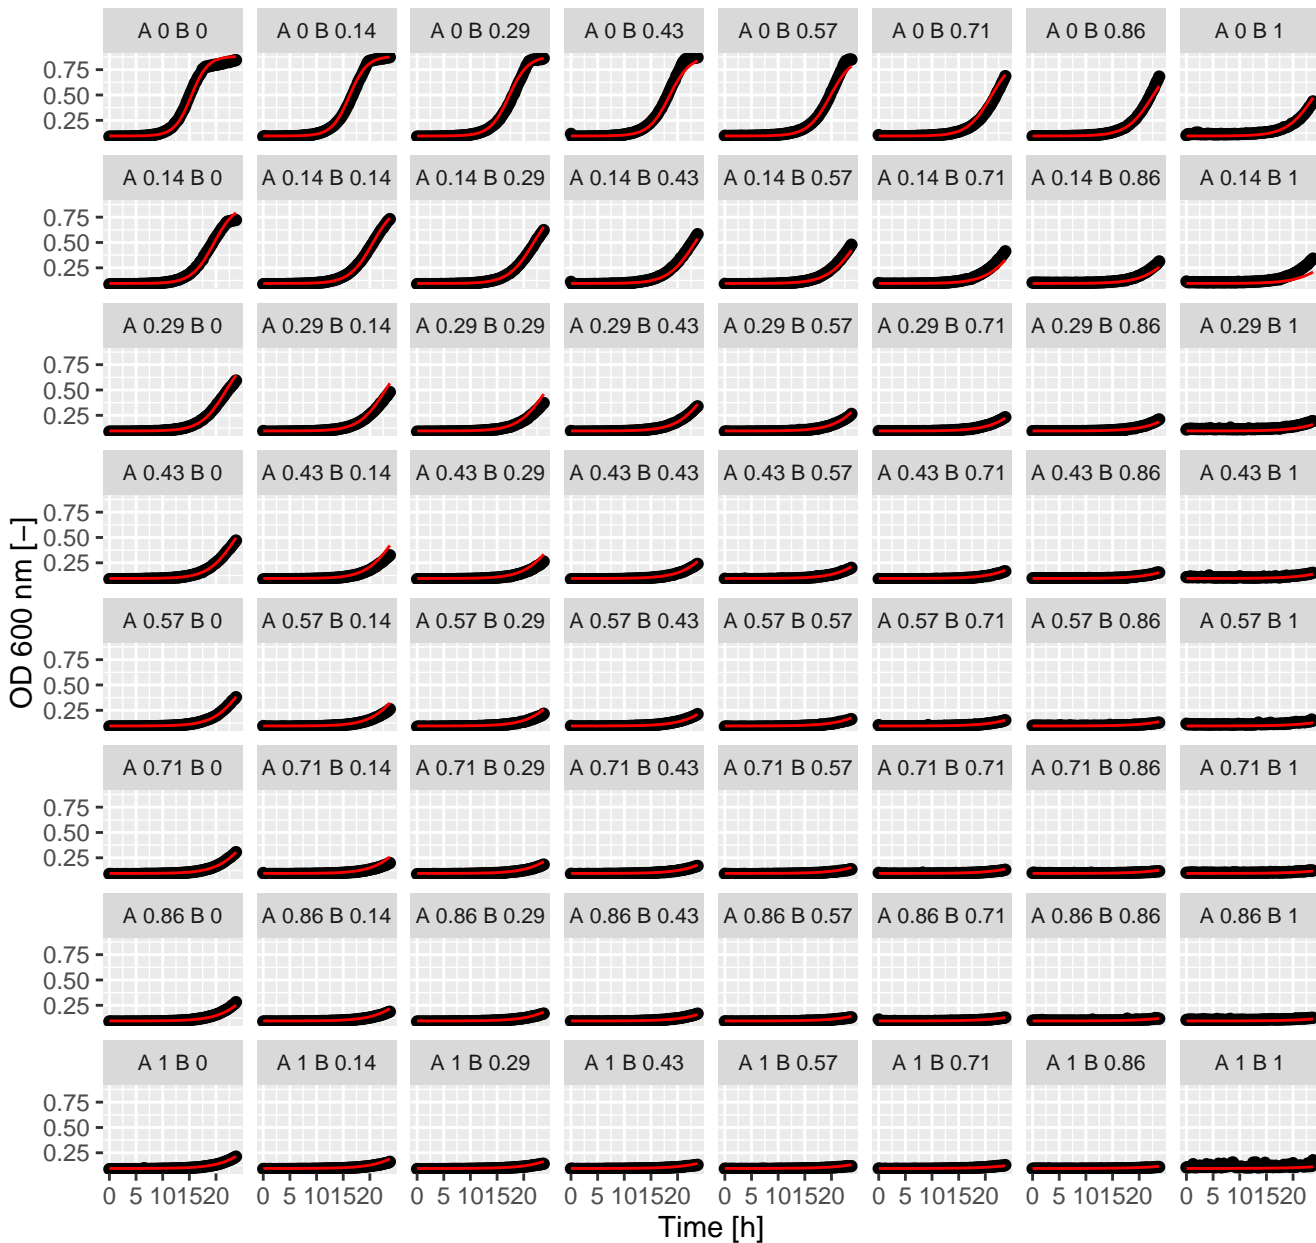



5FU.Sta (= Ax.Bx) exp. additivity (BI)  
Int\_AB = 0 and Int\_BA = 0 at EC50

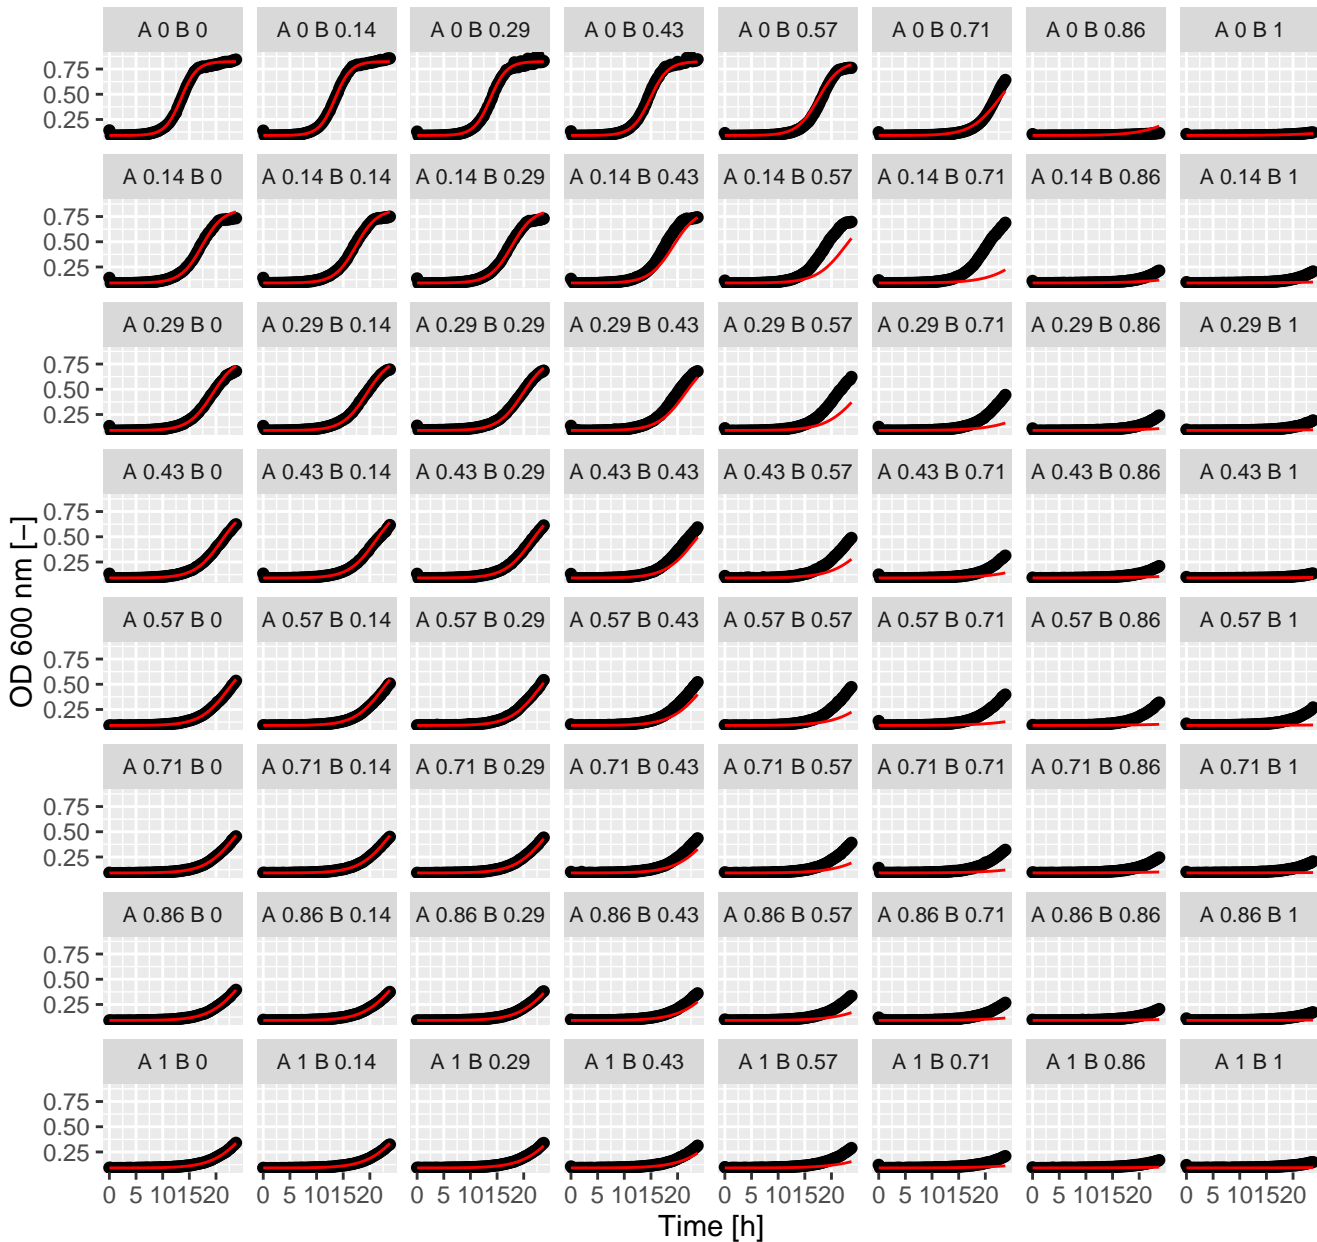

5FU.Sta (= Ax.Bx) full GPDI  
Int\_AB = 0.02 and Int\_BA = 0.55 at EC50

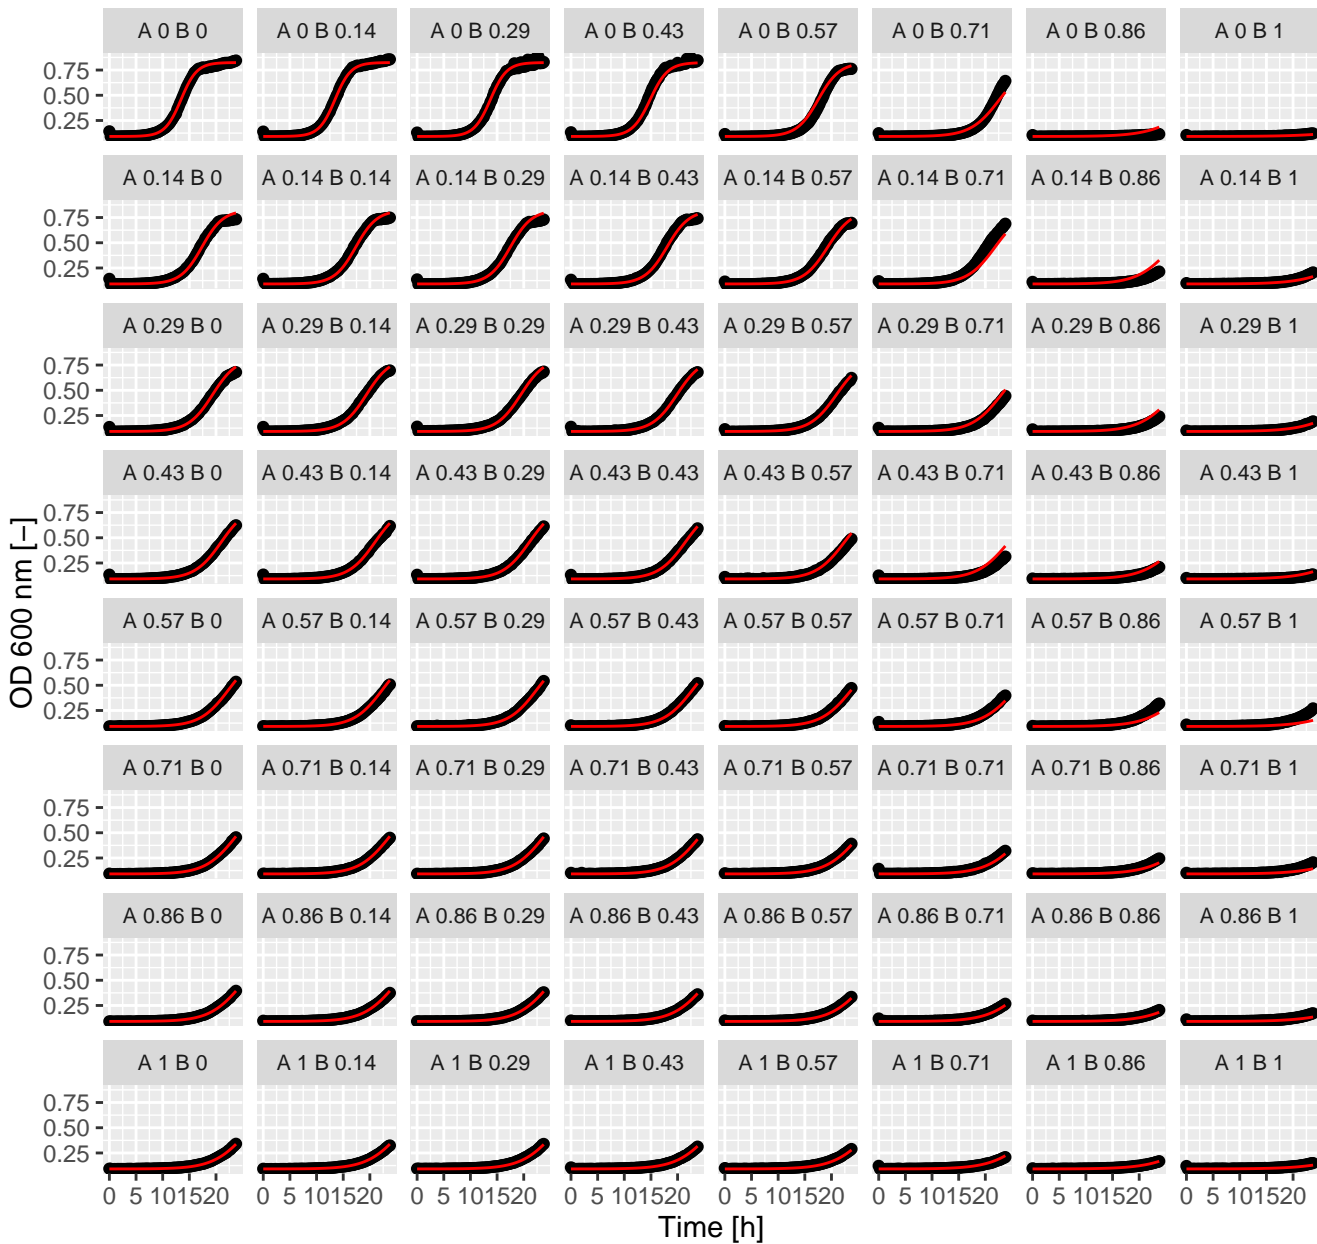

5FU.Pen (= Ax.Bx) exp. additivity (BI)  
Int\_AB = 0 and Int\_BA = 0 at EC50

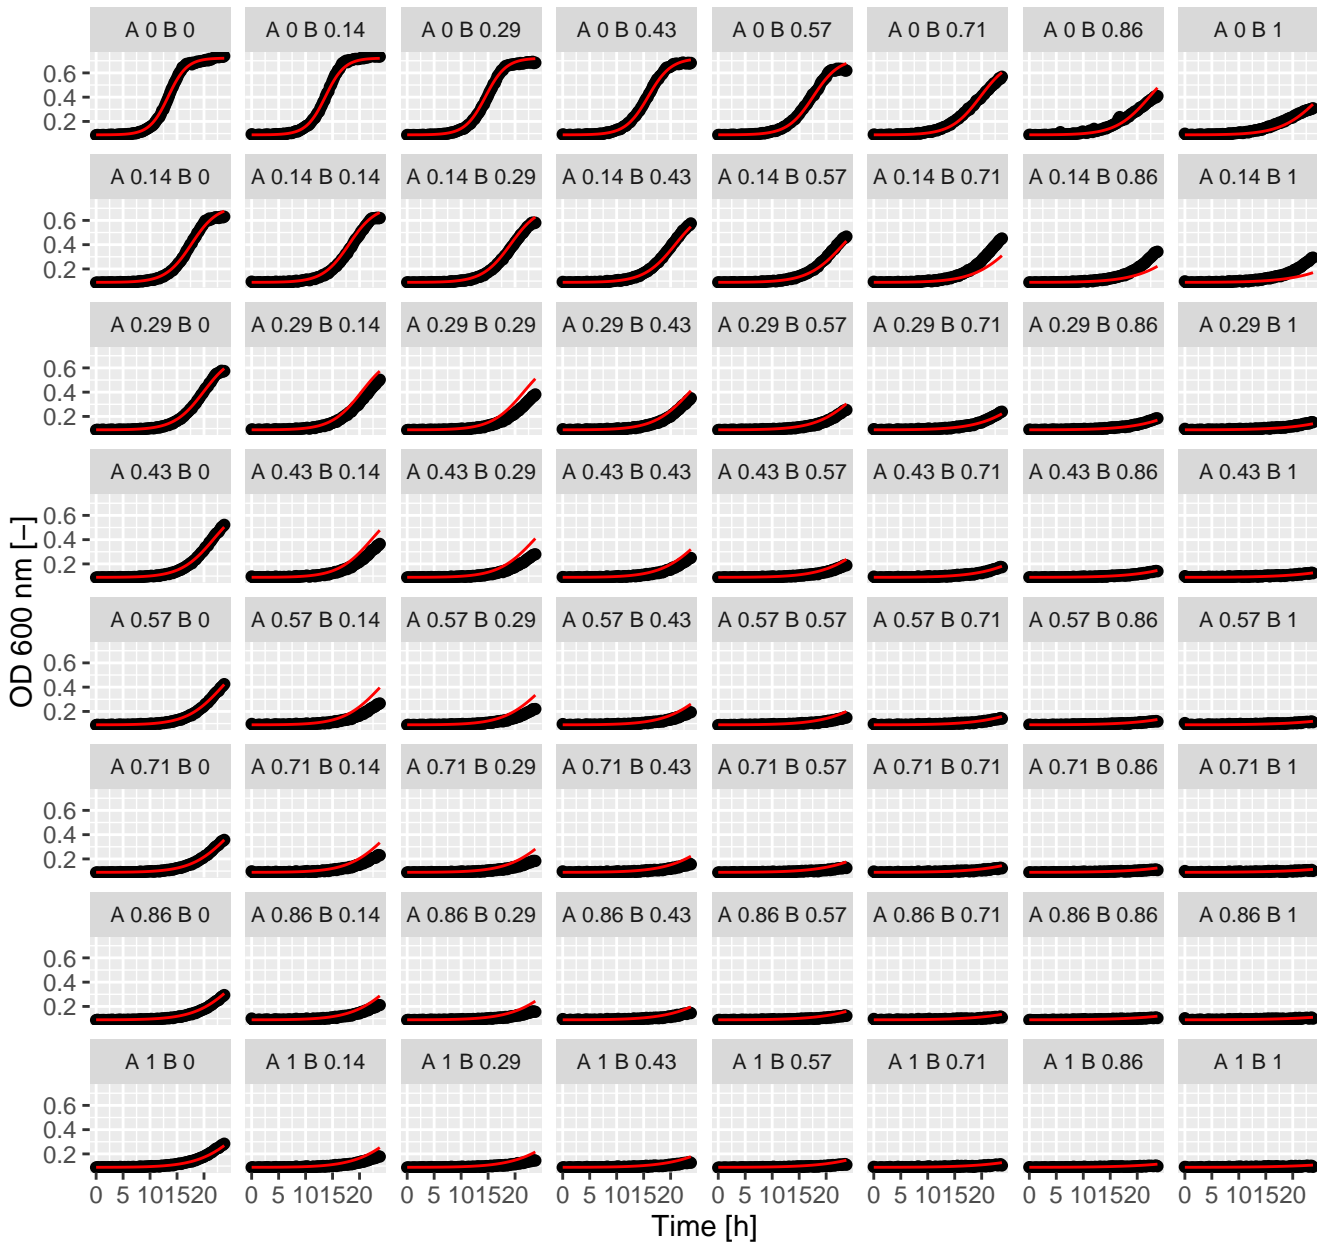

5FU.Pen (= Ax.Bx) full GPDI  
Int\_AB = -0.79 and Int\_BA = 7.73 at EC50

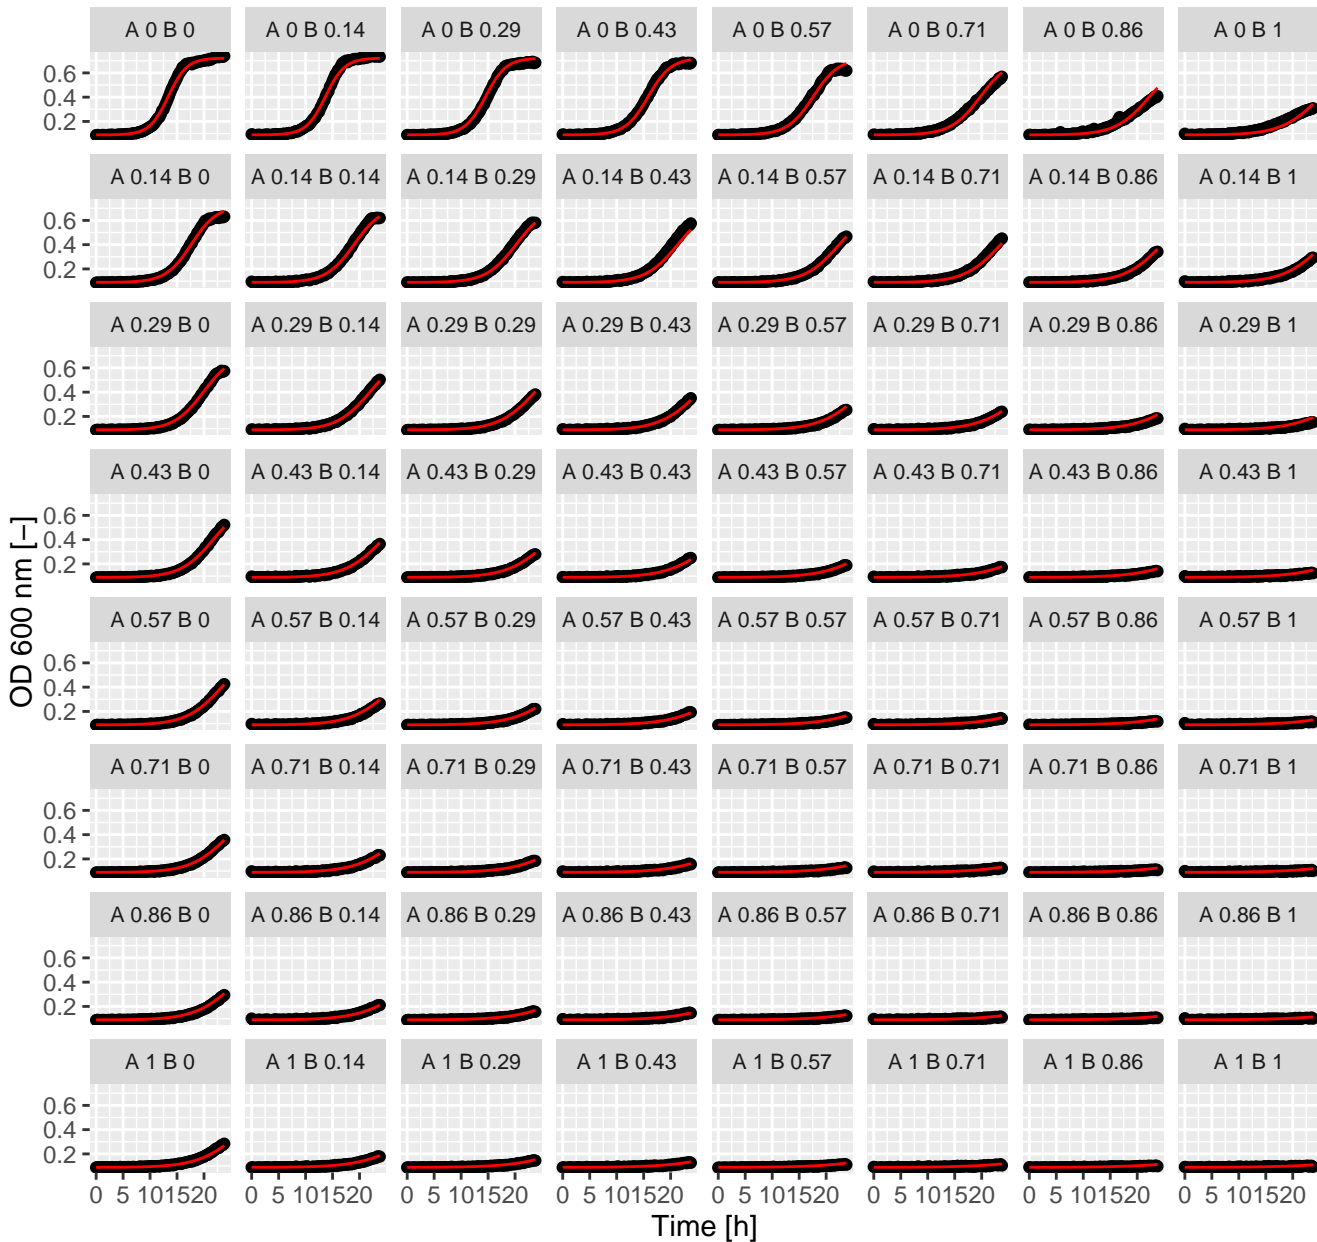

5FU.Lat (= Ax.Bx) exp. additivity (BI)  
Int\_AB = 0 and Int\_BA = 0 at EC50

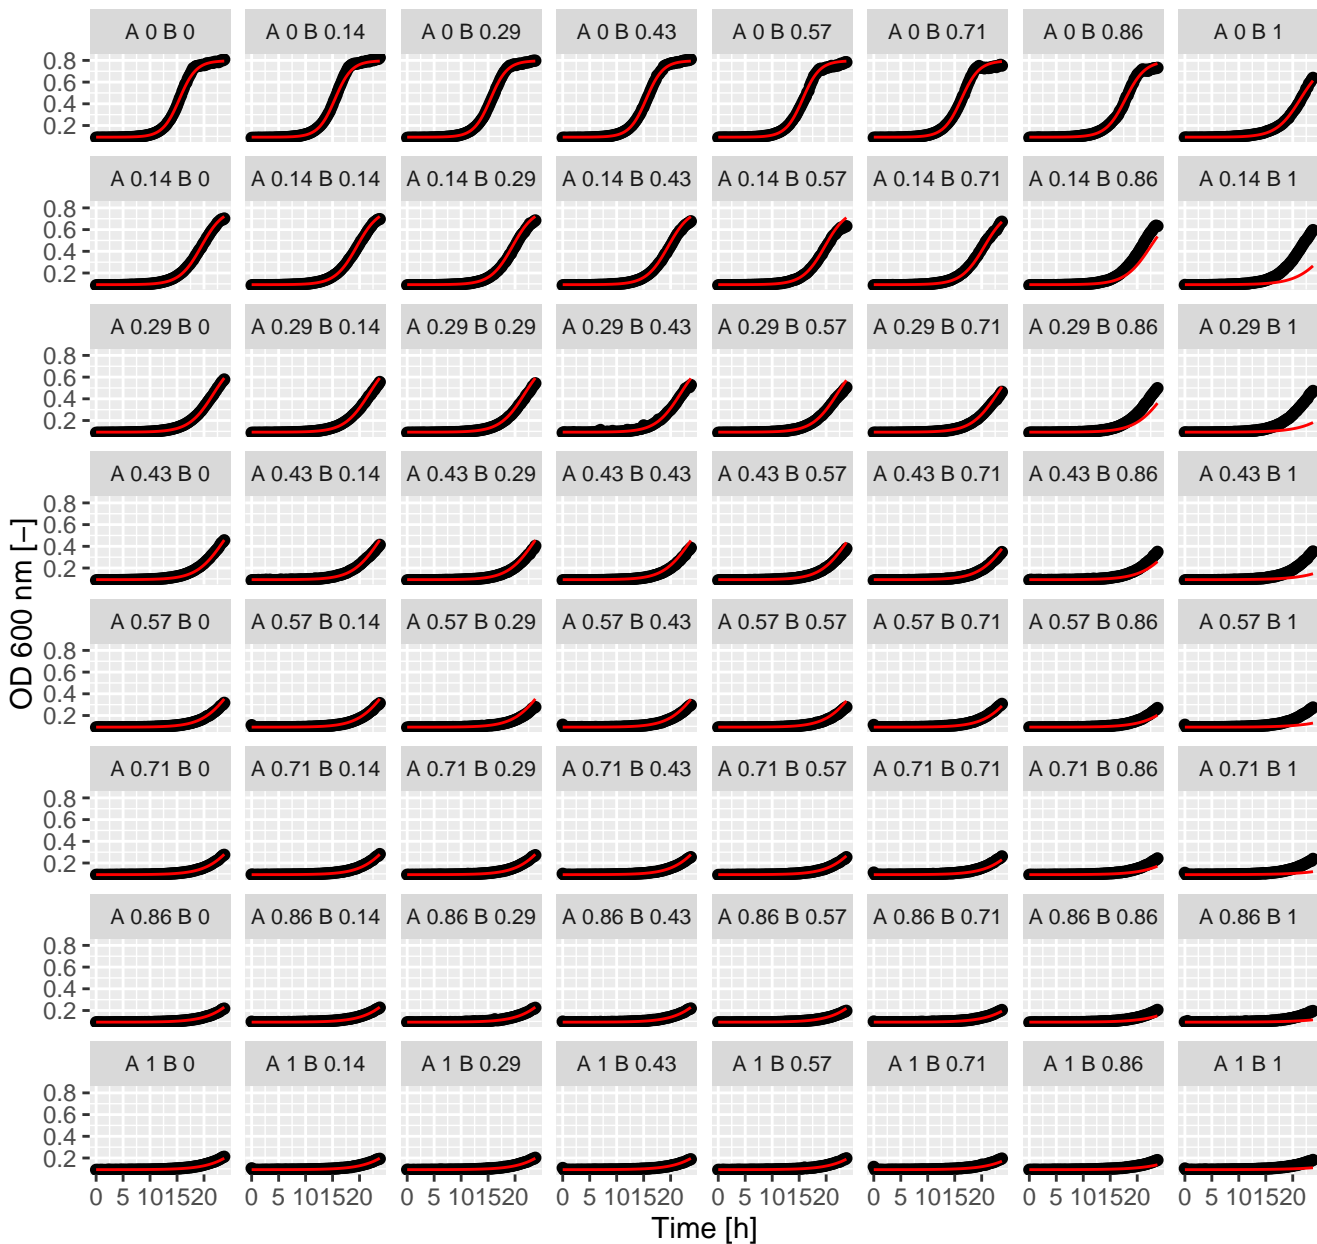

5FU.Lat (= Ax.Bx) full GPDI  
Int\_AB = -0.21 and Int\_BA = 1.85 at EC50

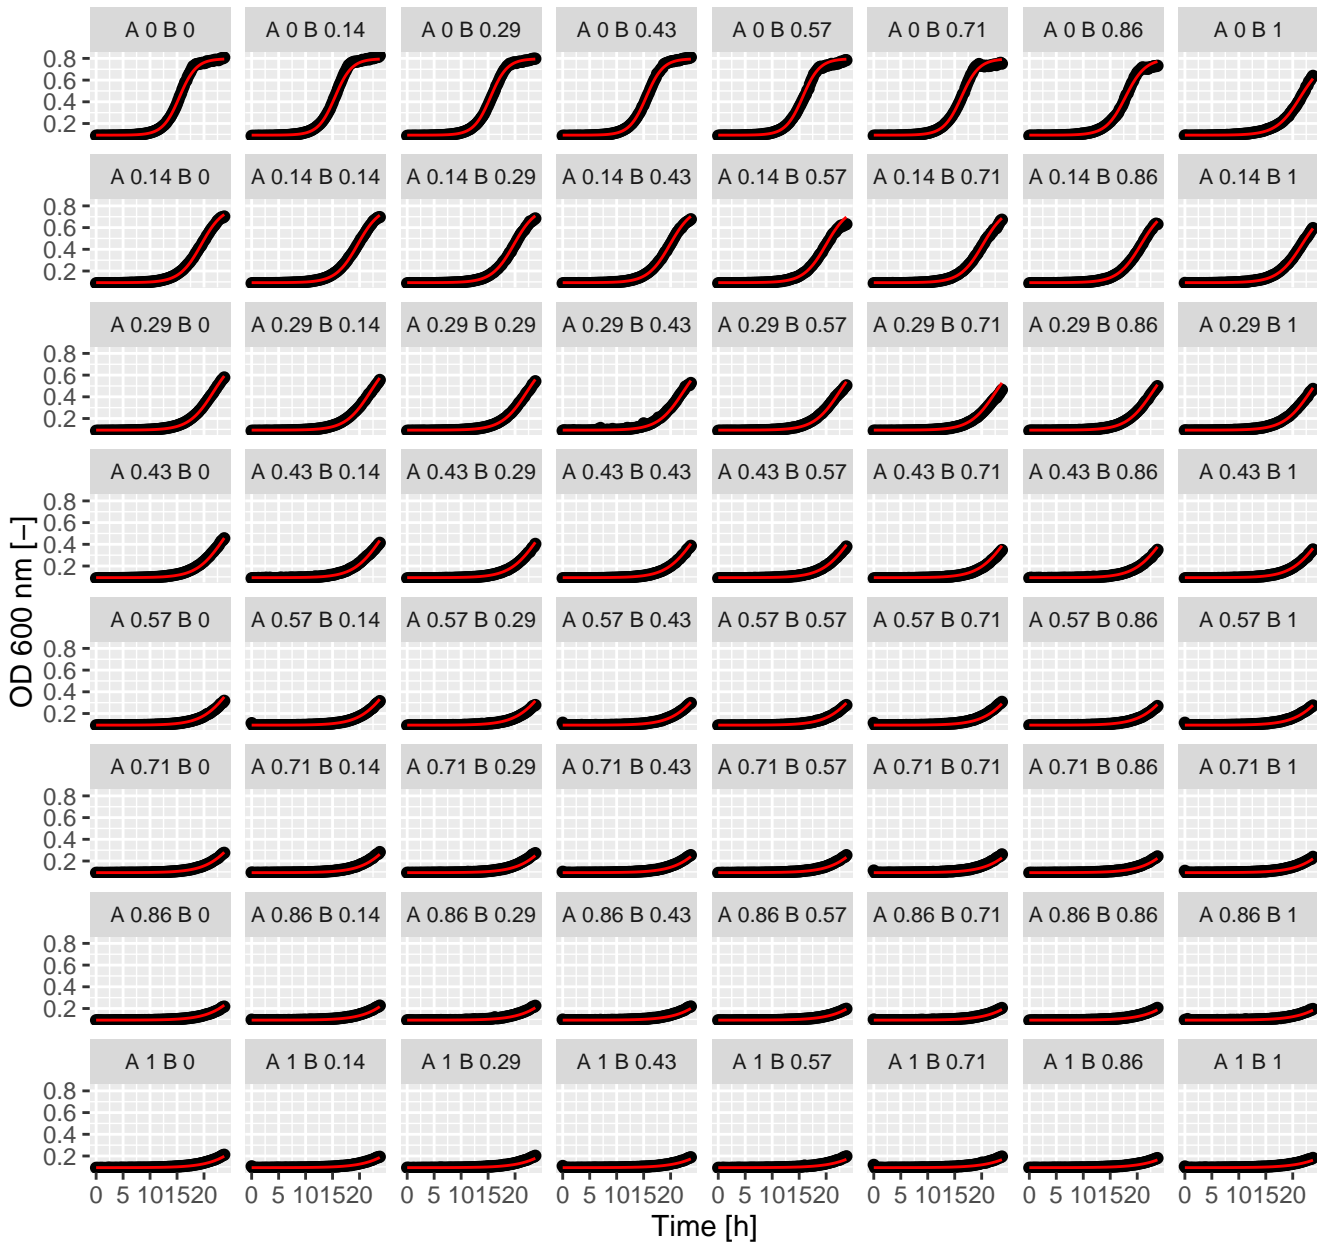

5FU.Ben (= Ax.Bx) exp. additivity (BI)  
Int\_AB = 0 and Int\_BA = 0 at EC50

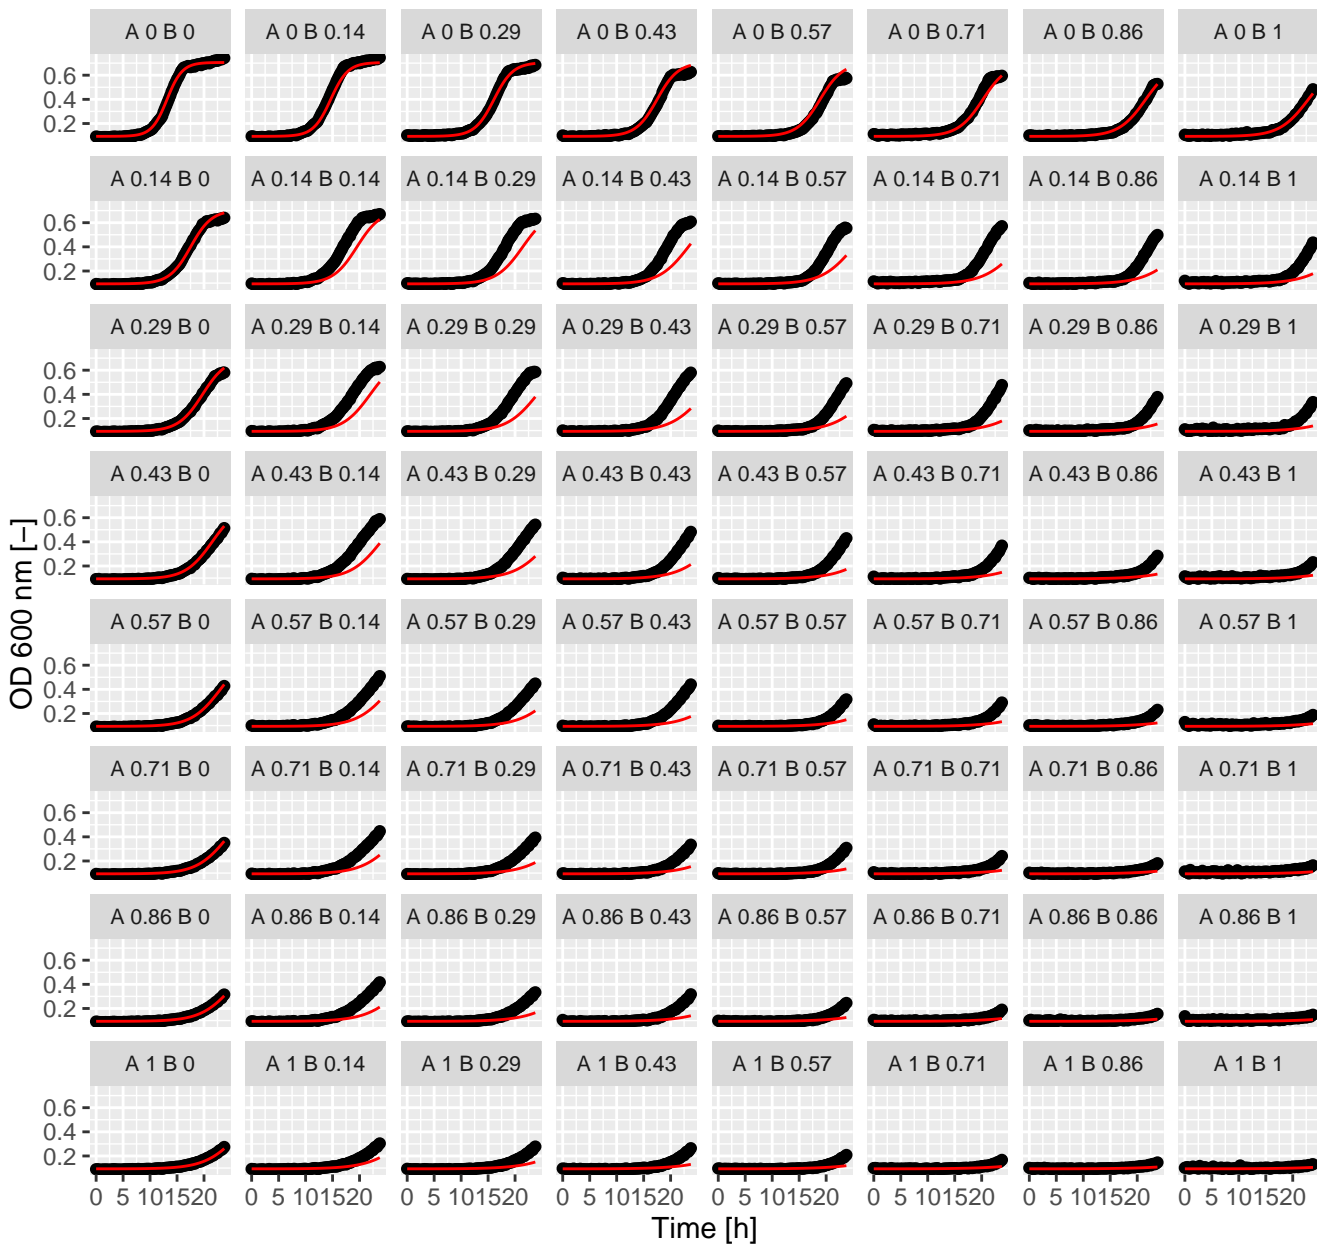

5FU.Ben (= Ax.Bx) full GPDI  
Int\_AB = 0.89 and Int\_BA = 0.64 at EC50

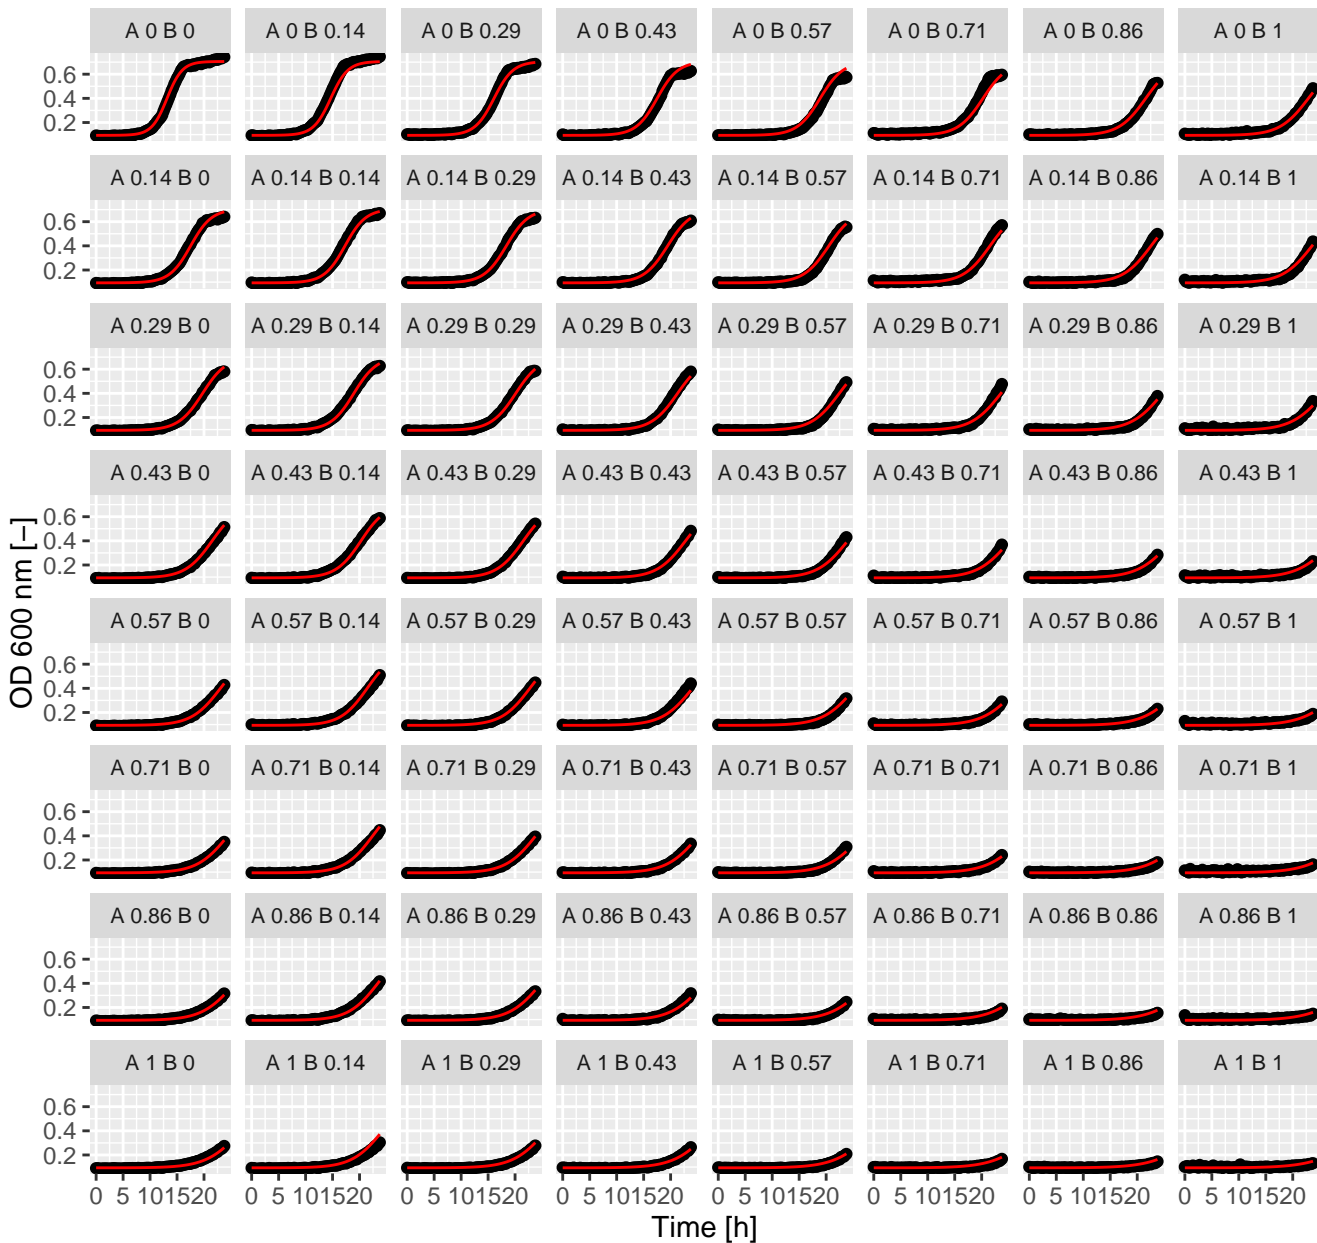



## 5FU.5FU (= Ax.Bx) Greco

 $\alpha = -0.04$ 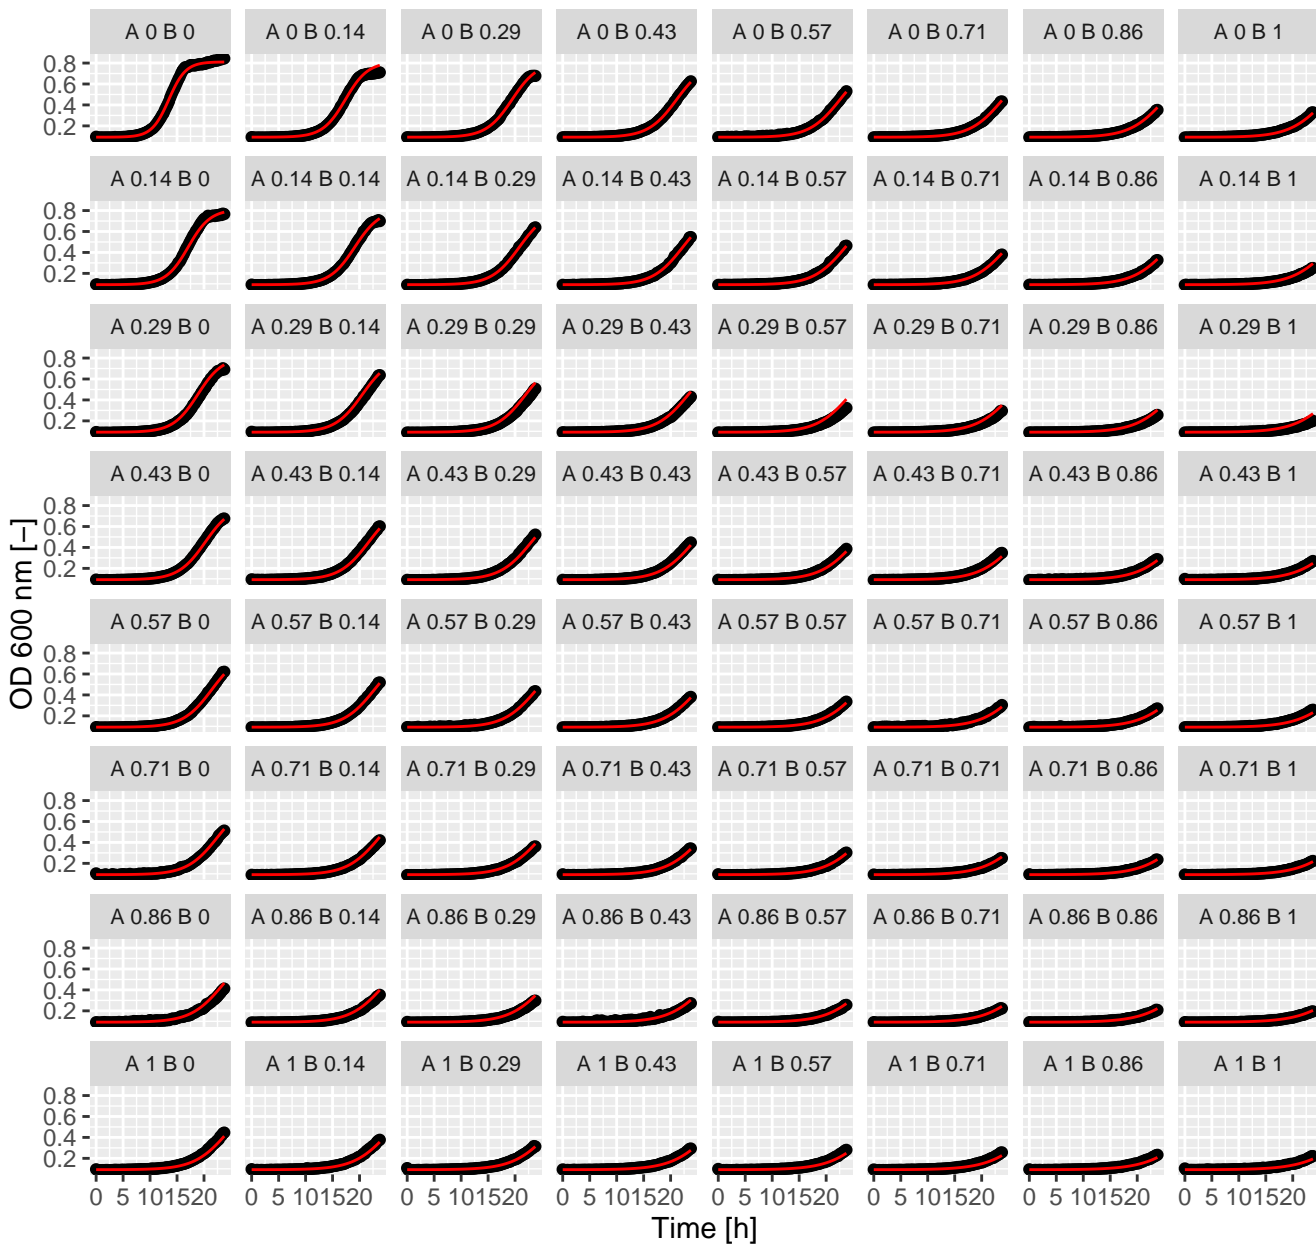

Tun.Tun (= Ax.Bx) Greco  
alpha = 0.39

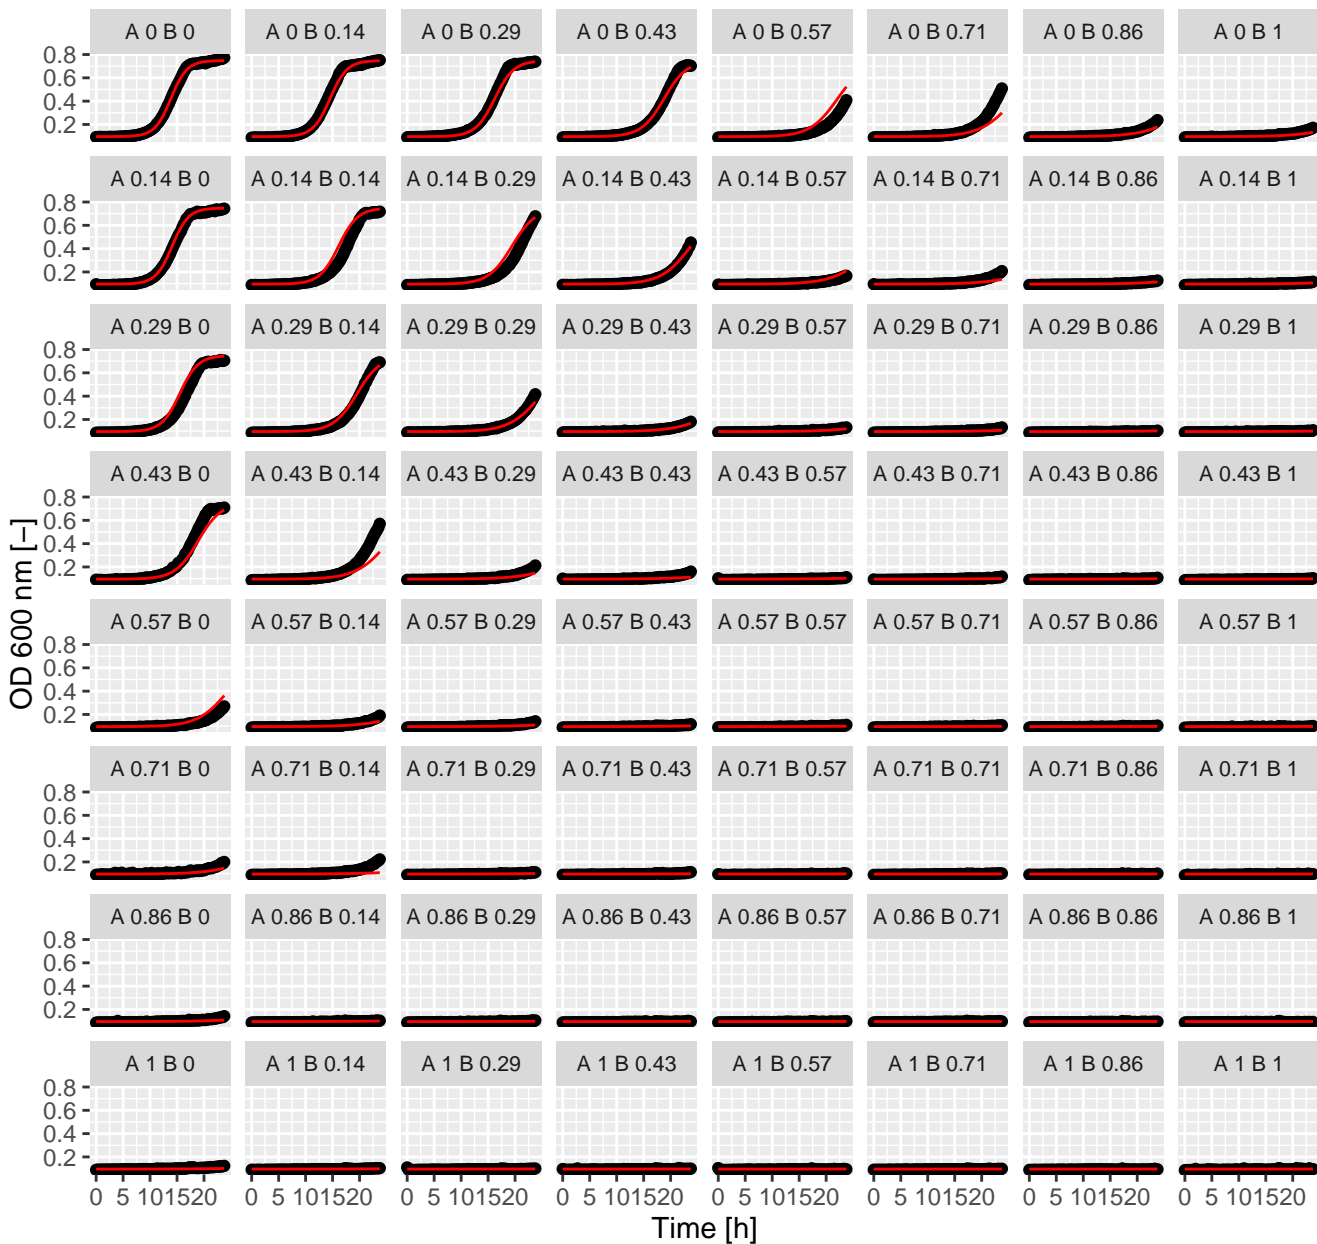

Ter.Tun (= Ax.Bx) Greco  
alpha = 0.13

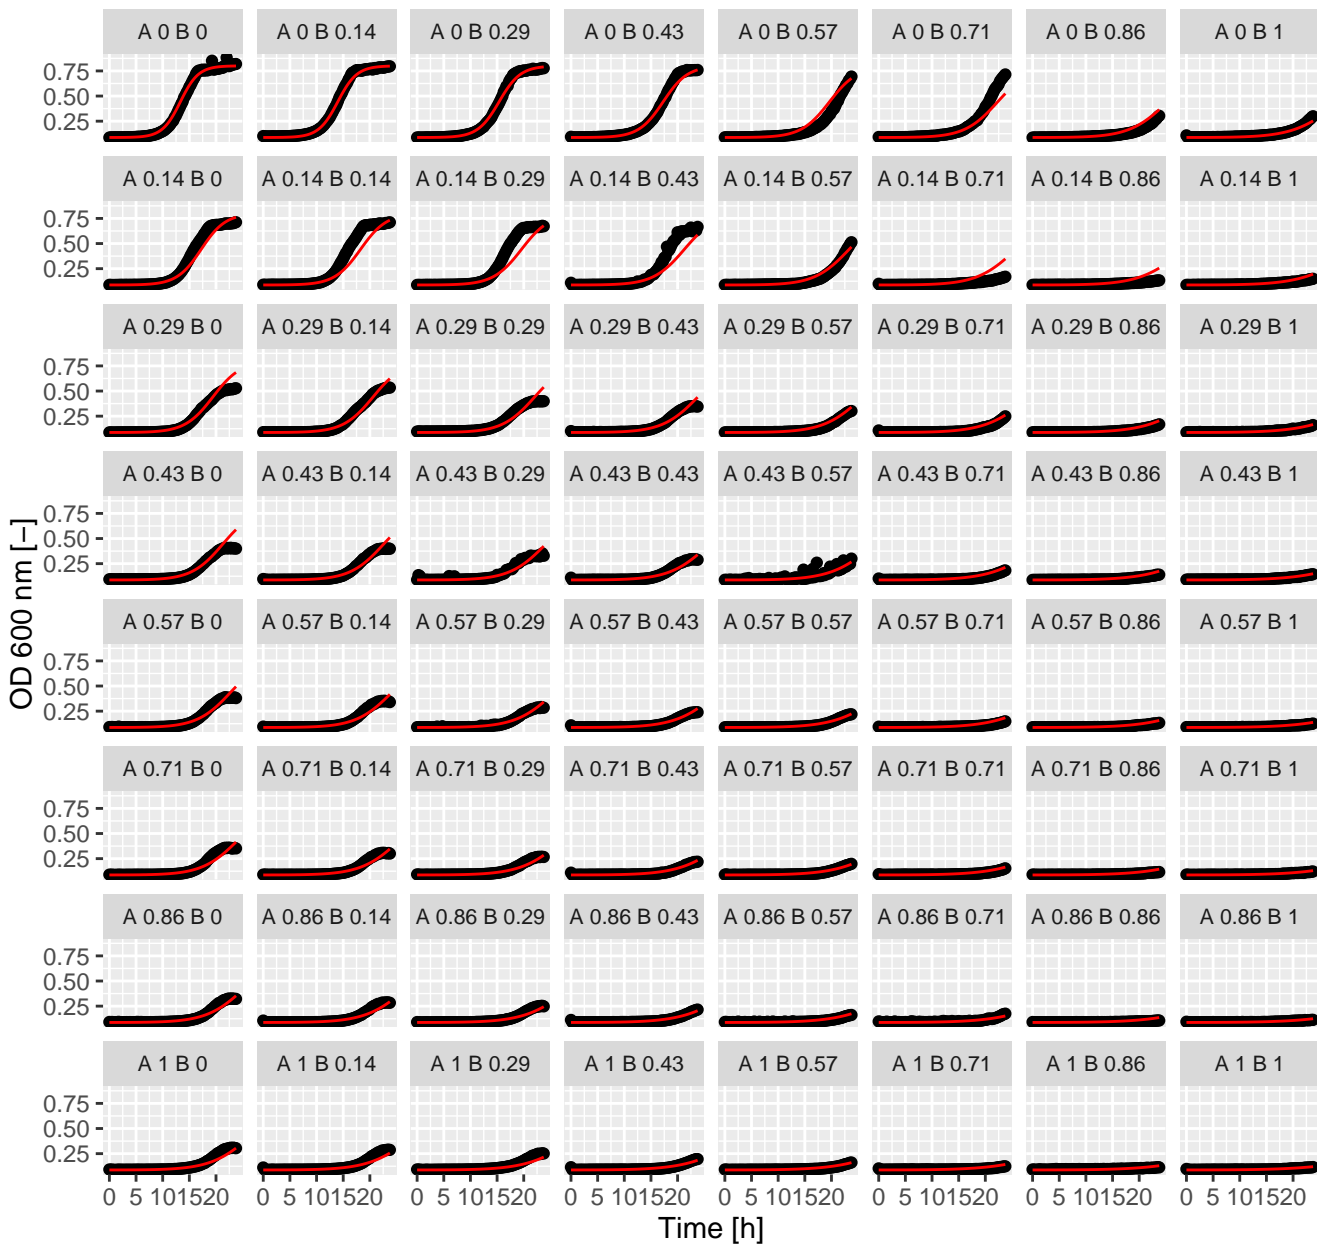

Ter.Ter (= Ax.Bx) Greco  
 $\alpha = -0.34$

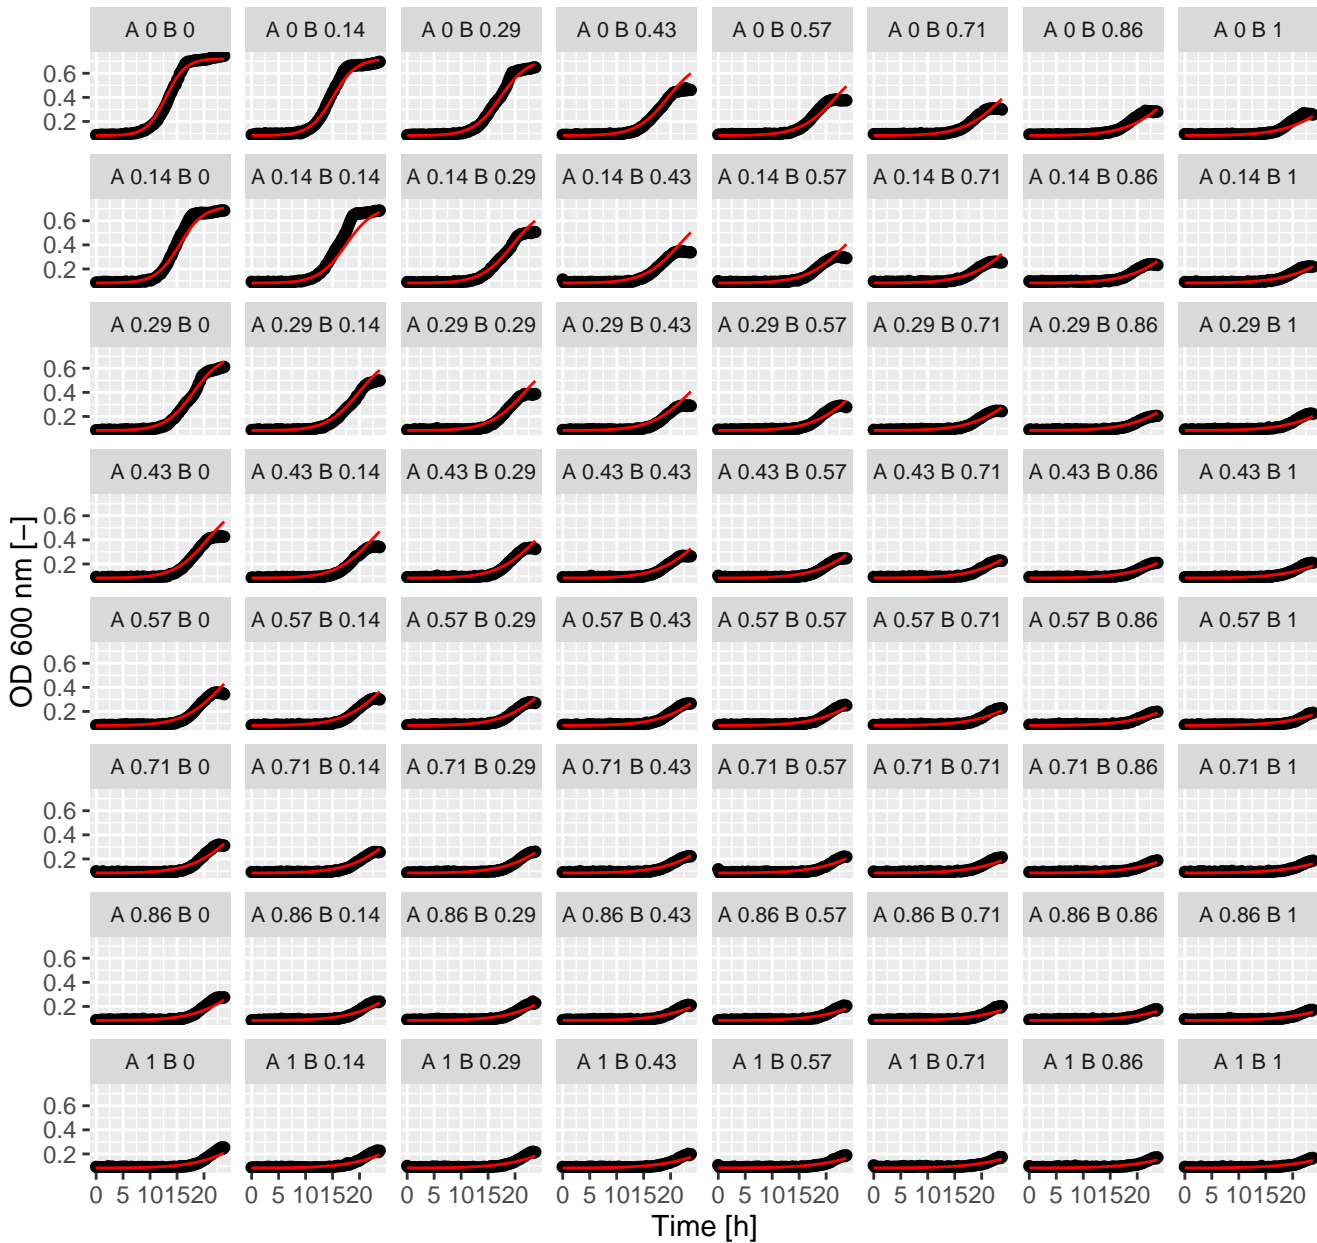

Tam.Ter (= Ax.Bx) Greco  
alpha = -0.03

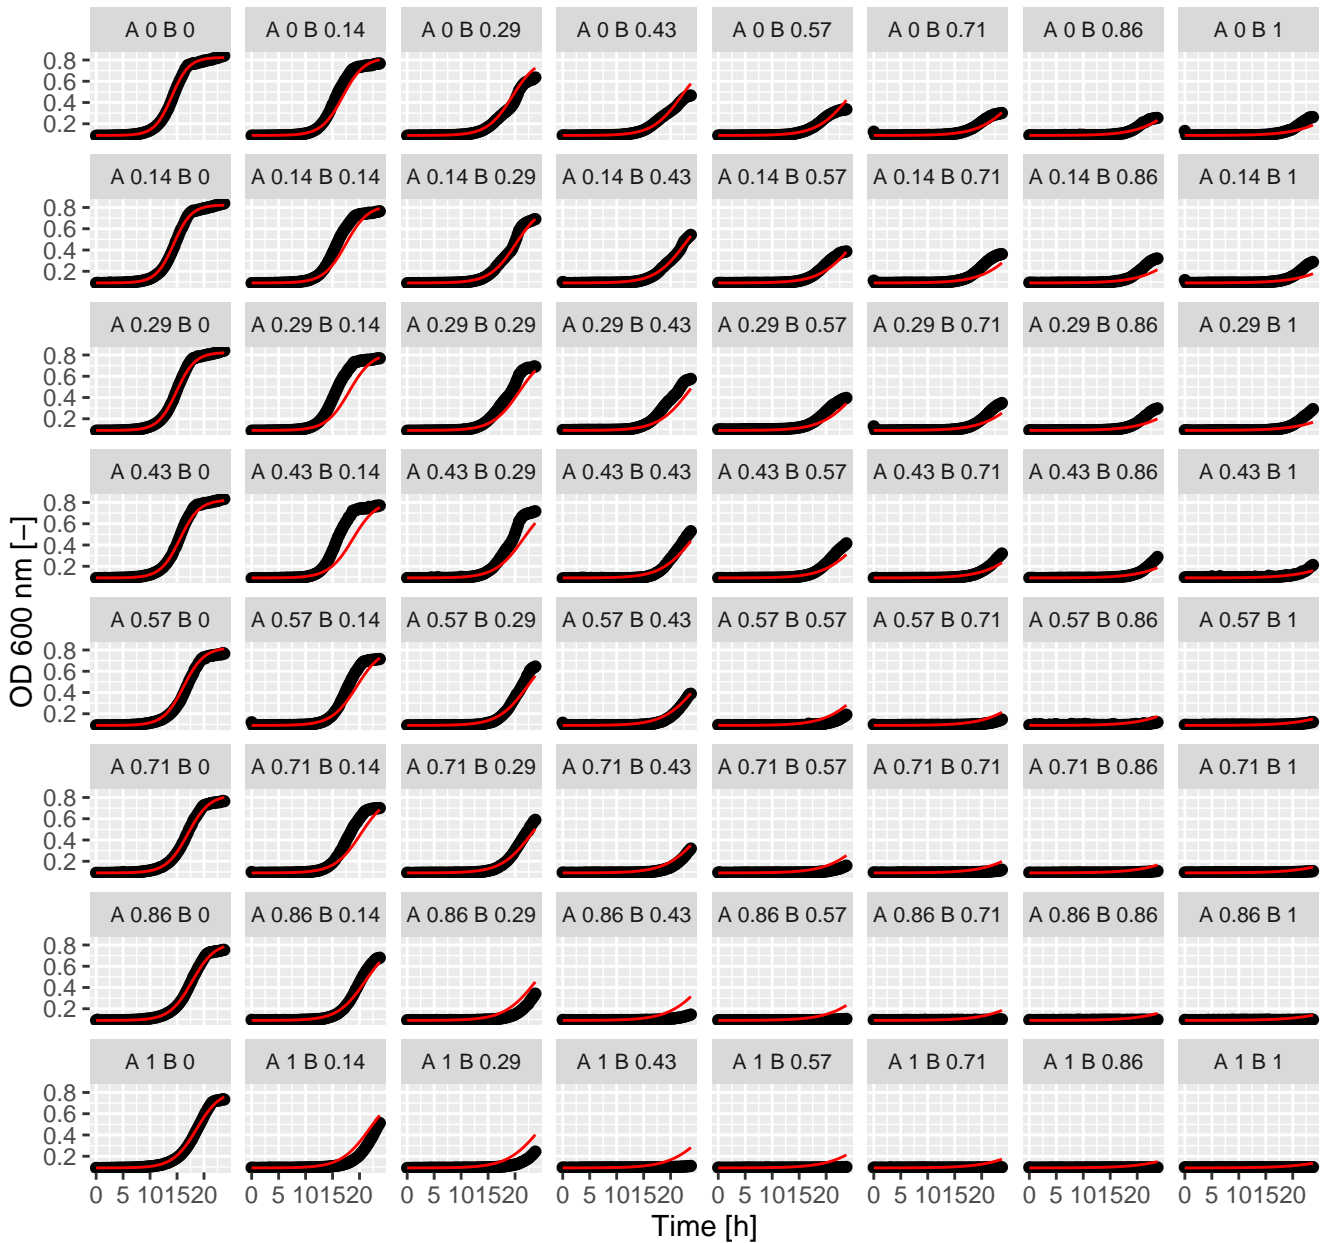

Tam.Tam (= Ax.Bx) Greco  
 $\alpha = 1.82$

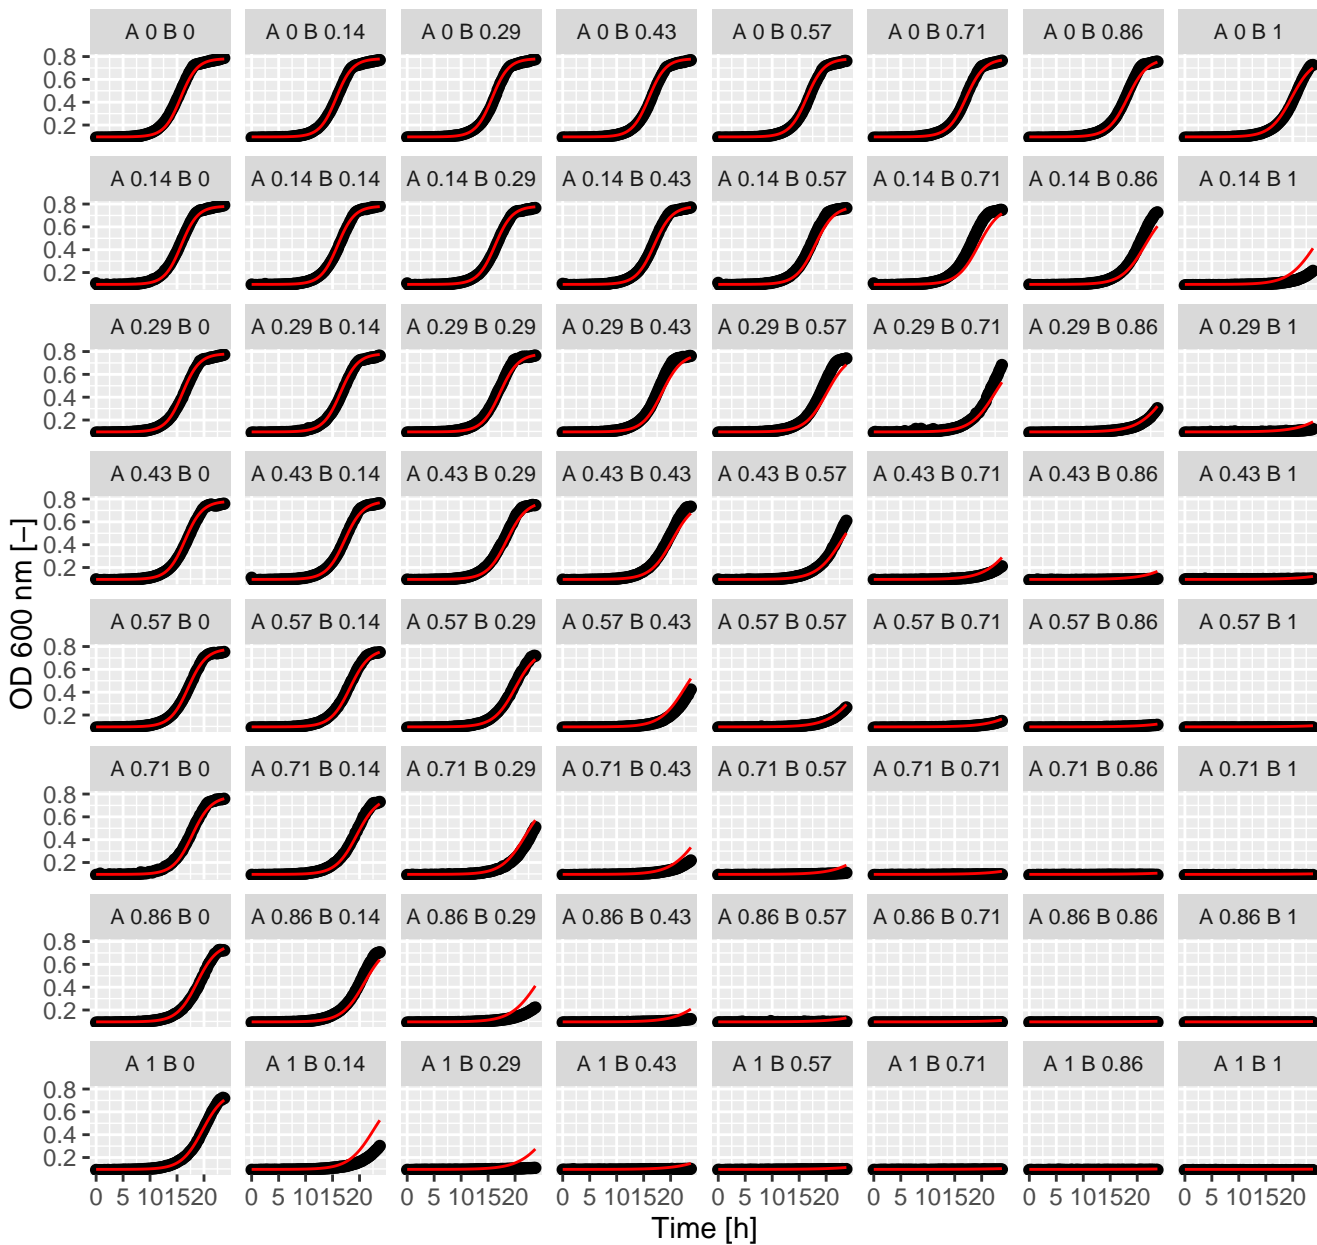

Tac.Tun (= Ax.Bx) Greco  
 $\alpha = -0.15$

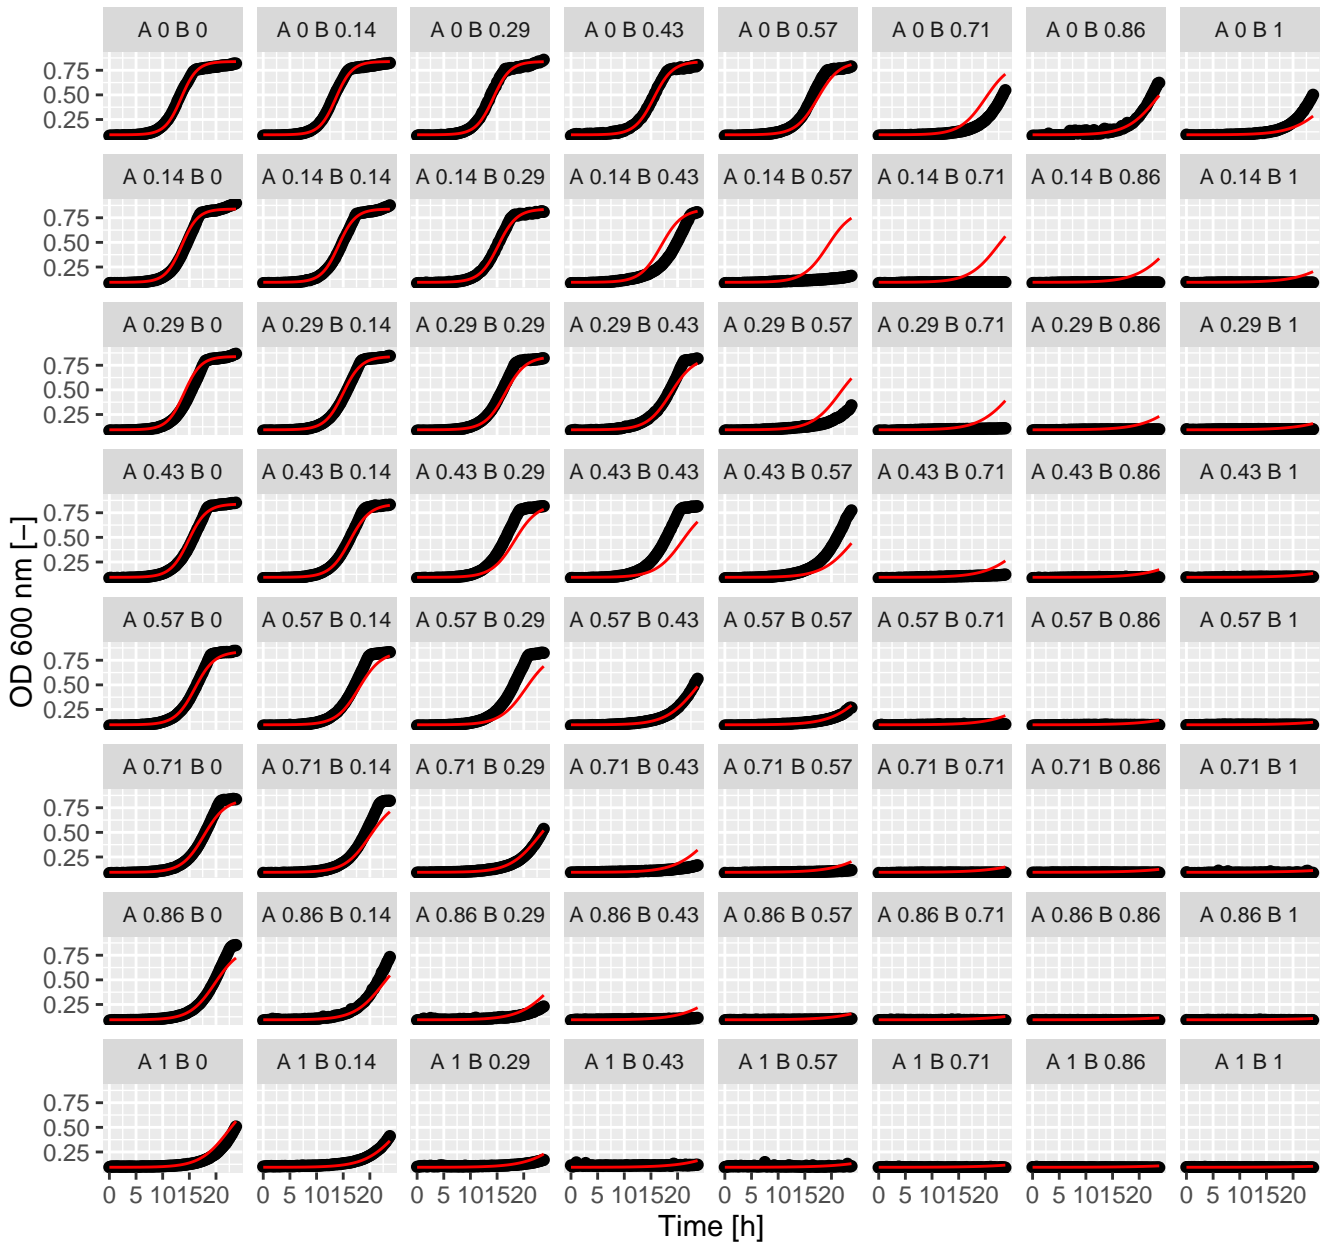

Tac.Ter (= Ax.Bx) Greco  
 $\alpha = 61.27$

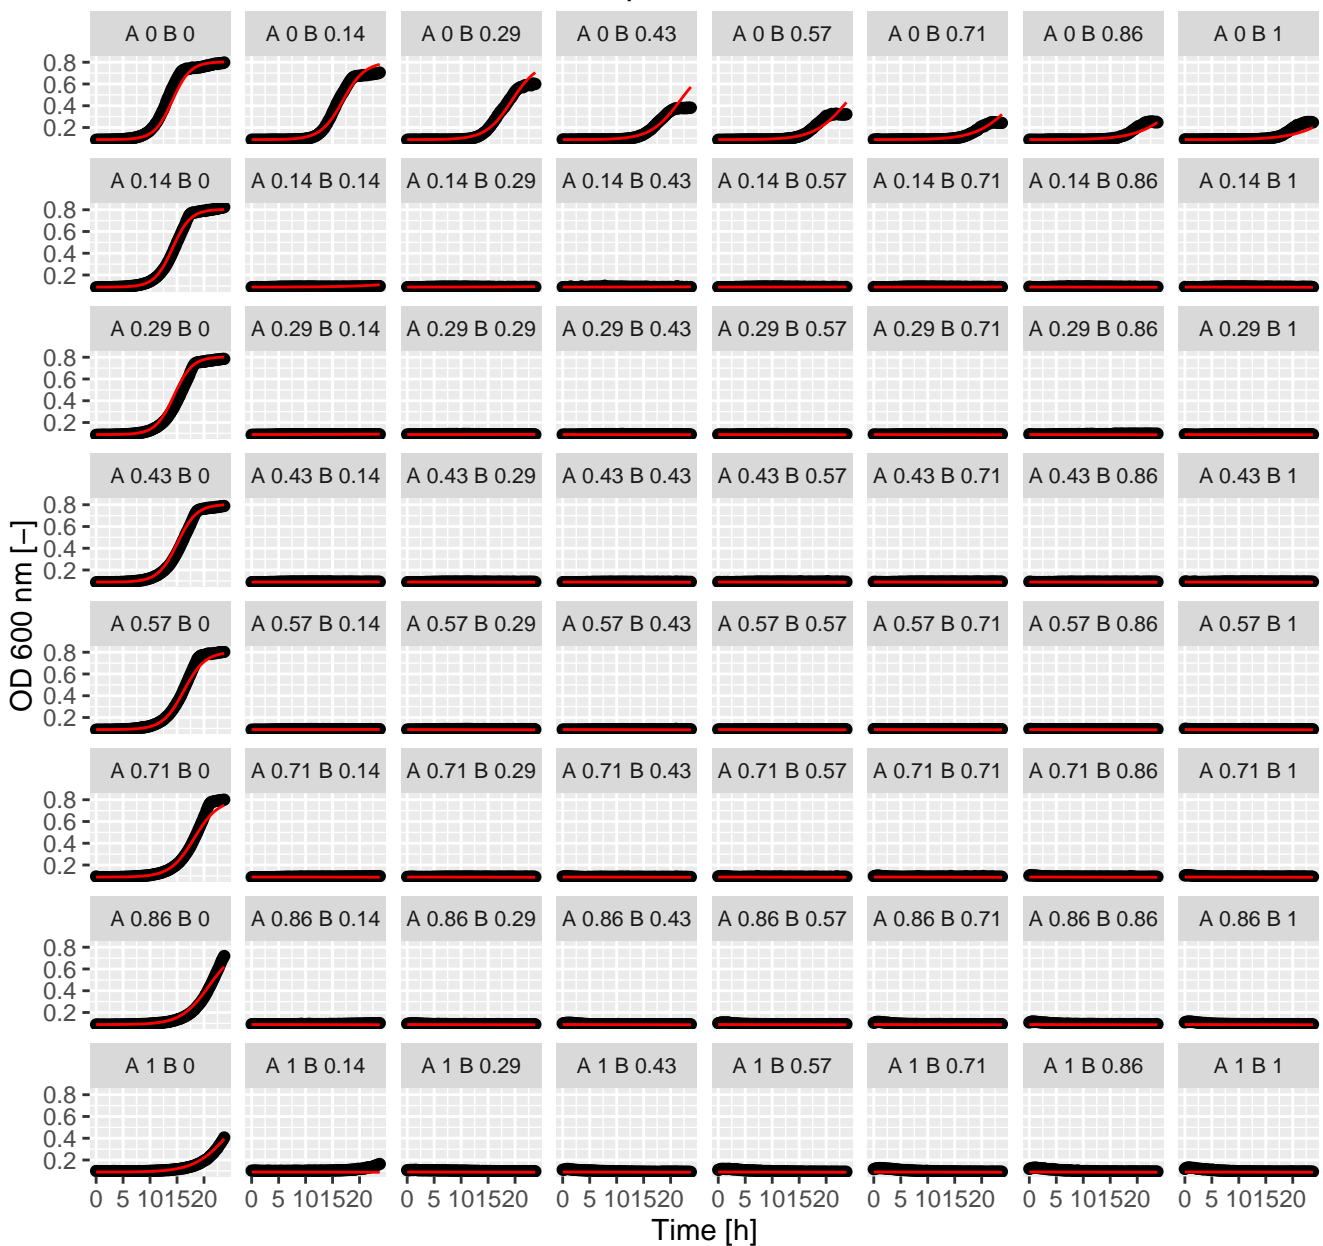



# Tac.Tam (= Ax.Bx) Greco

alpha = 1.1

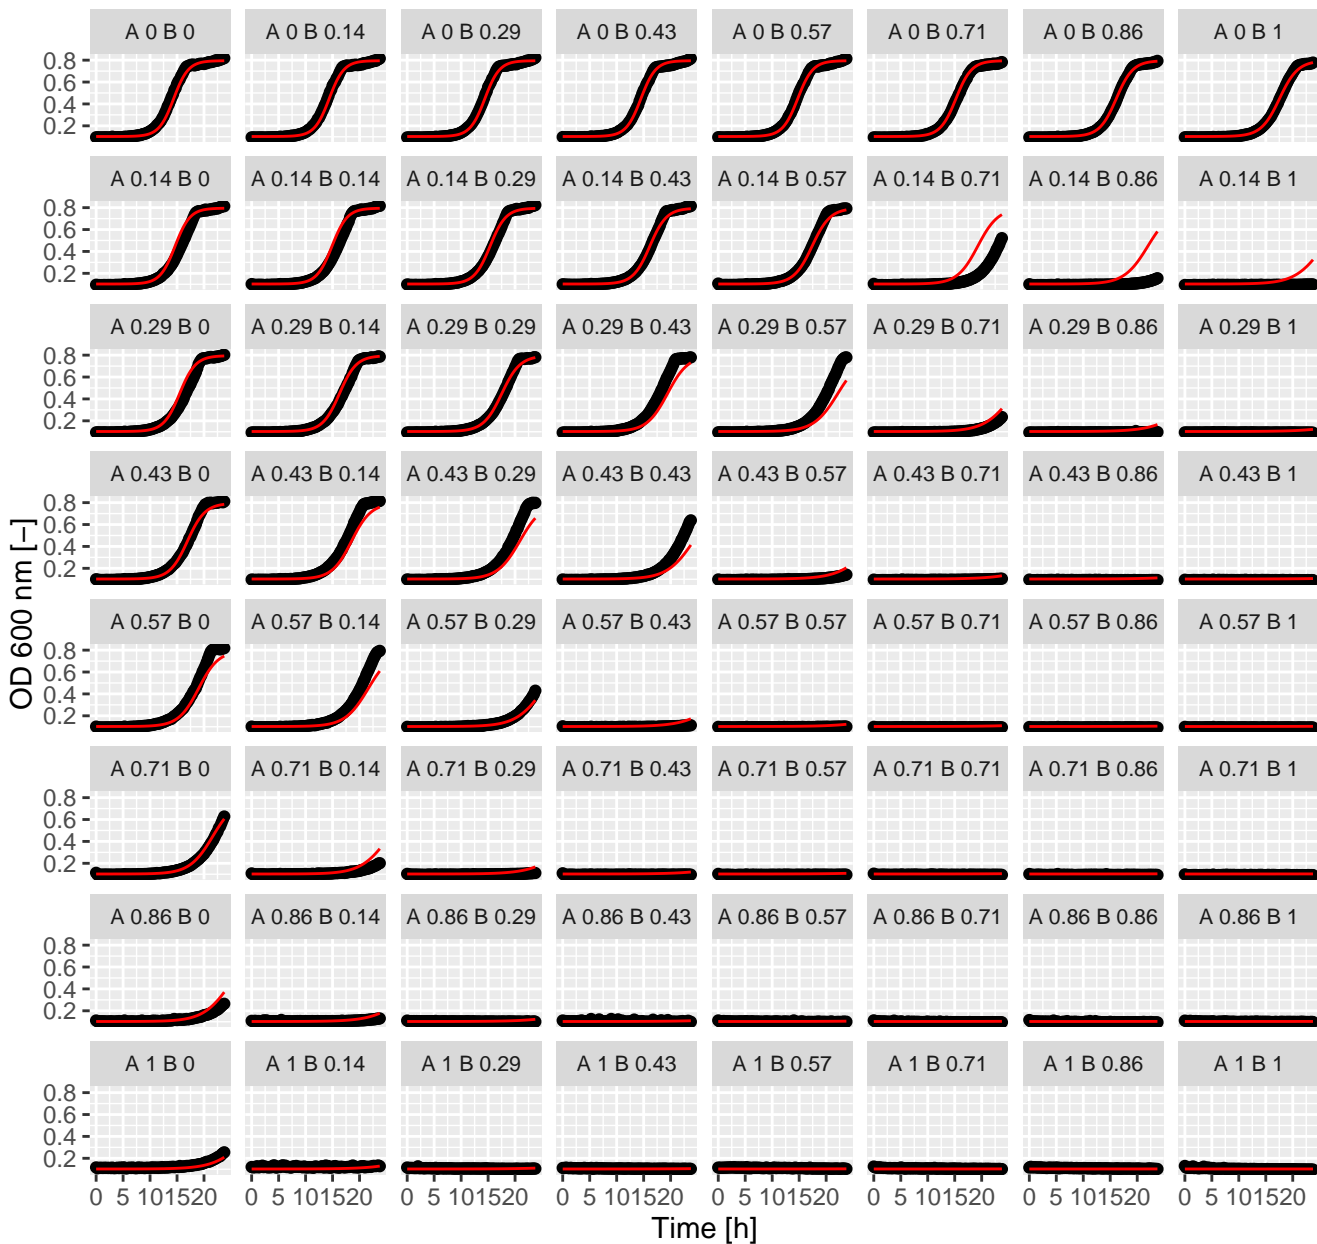

Tac.Tac (= Ax.Bx) Greco  
 $\alpha = -0.14$

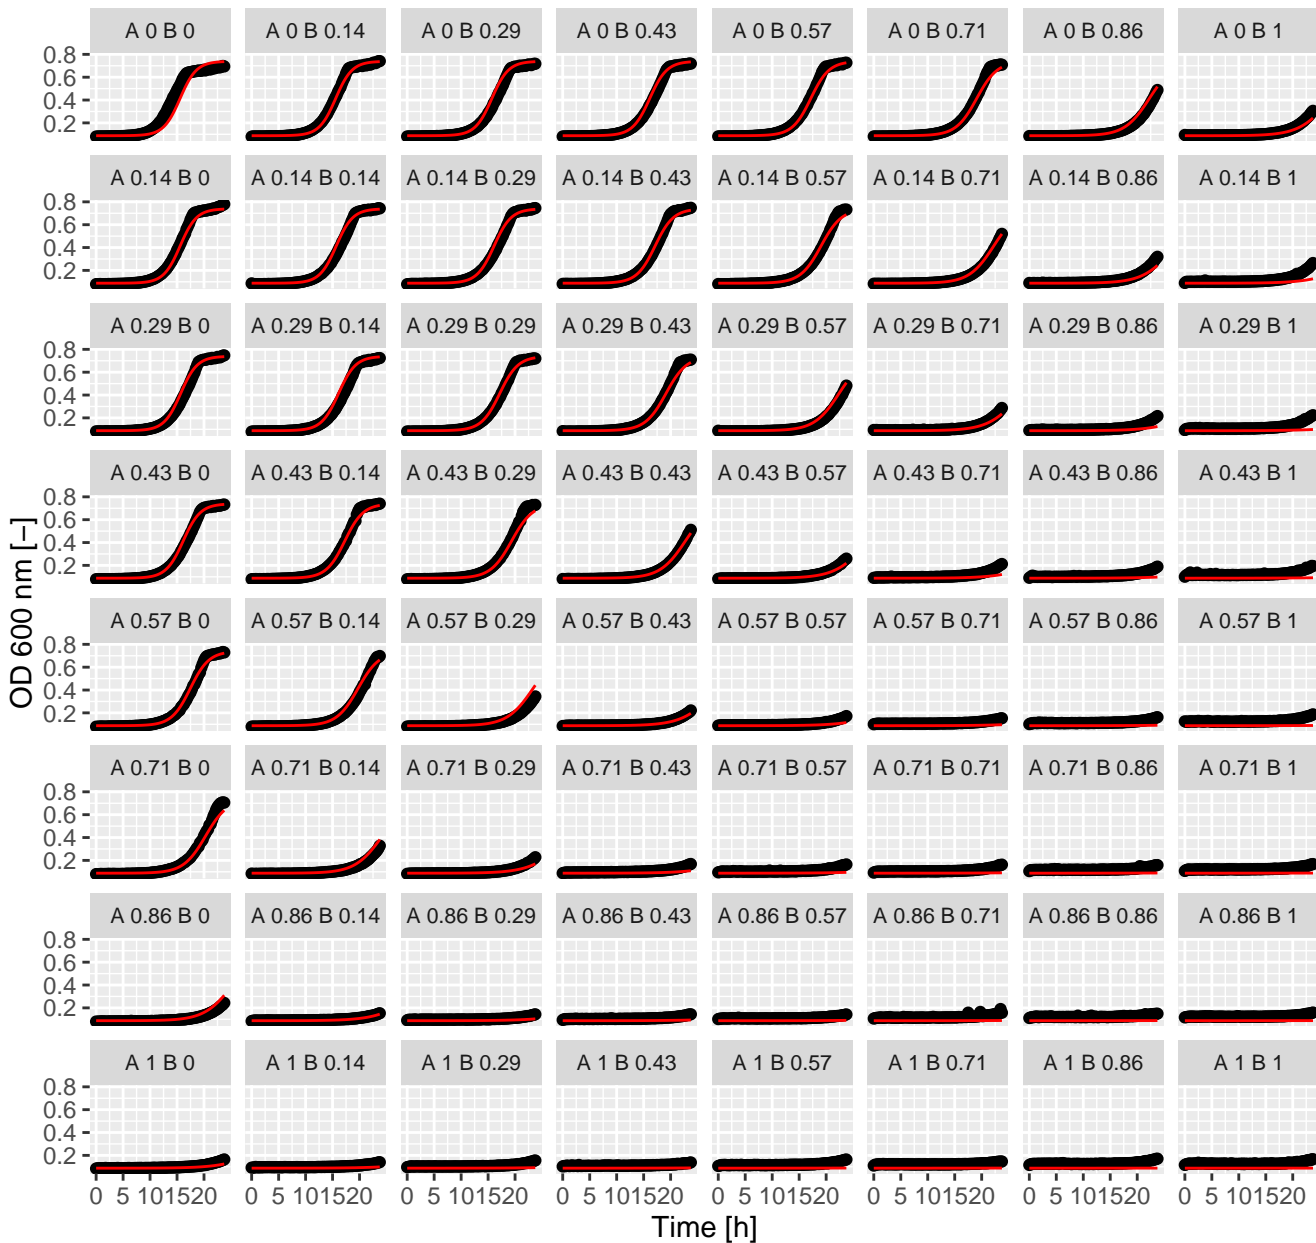

Sta.Wor (= Ax.Bx) Greco  
 $\alpha = -1$

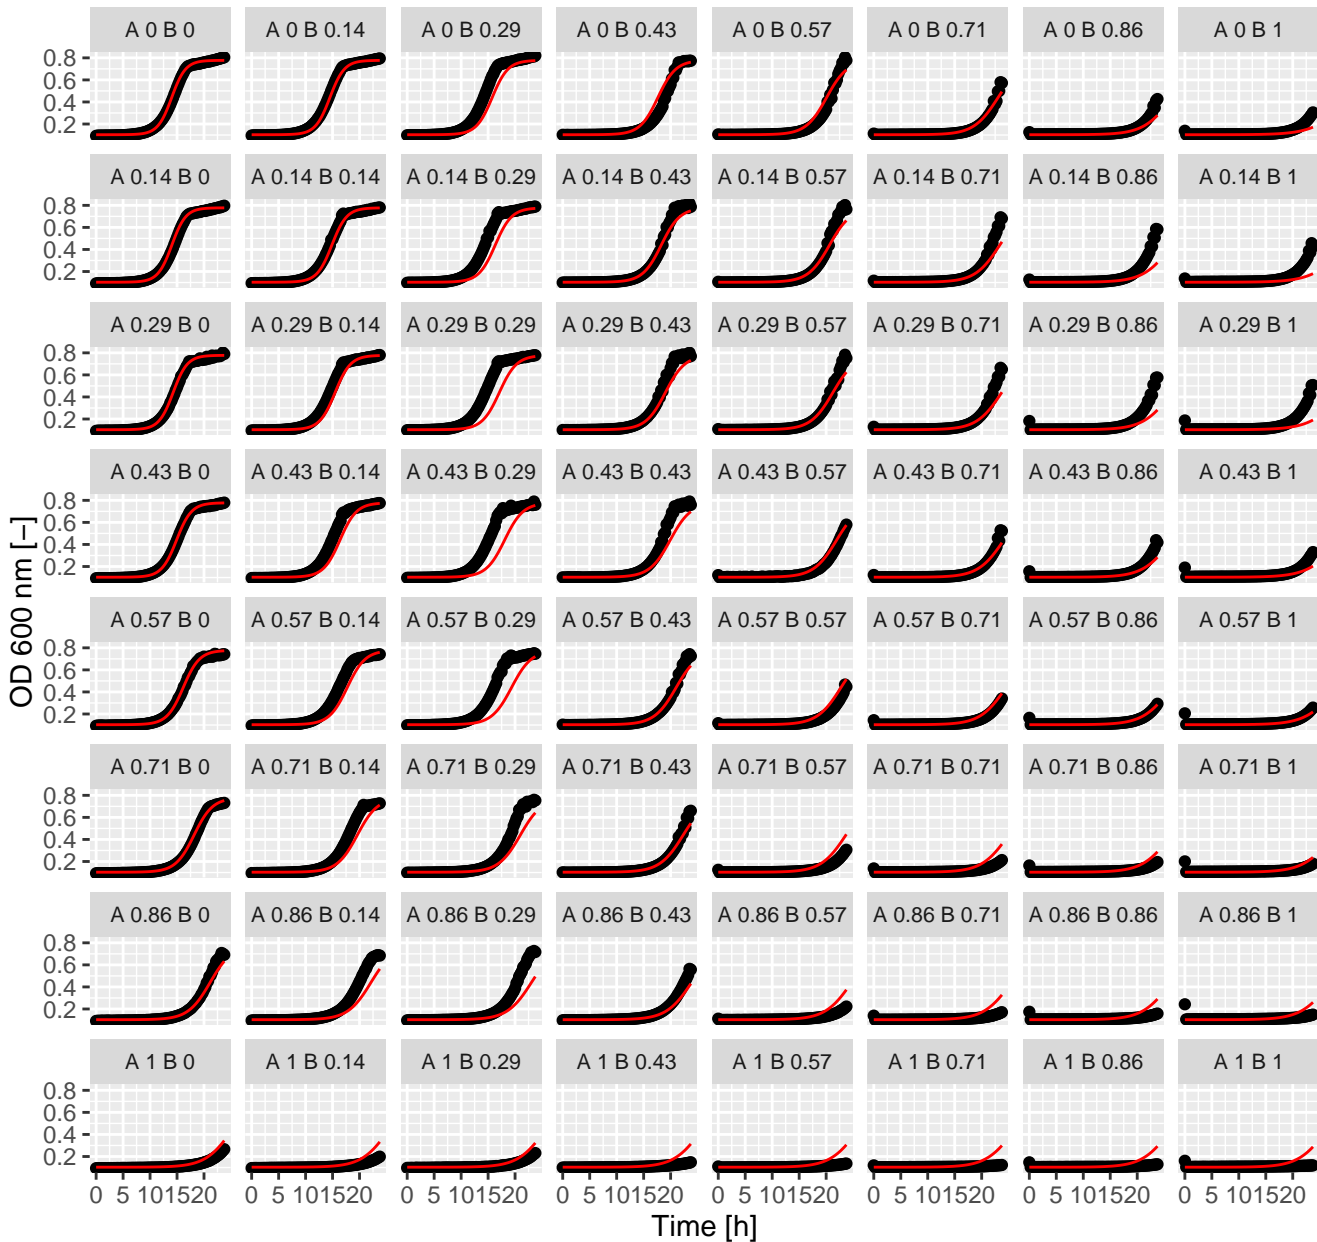

Sta.Tun (= Ax.Bx) Greco  
 $\alpha = -0.25$

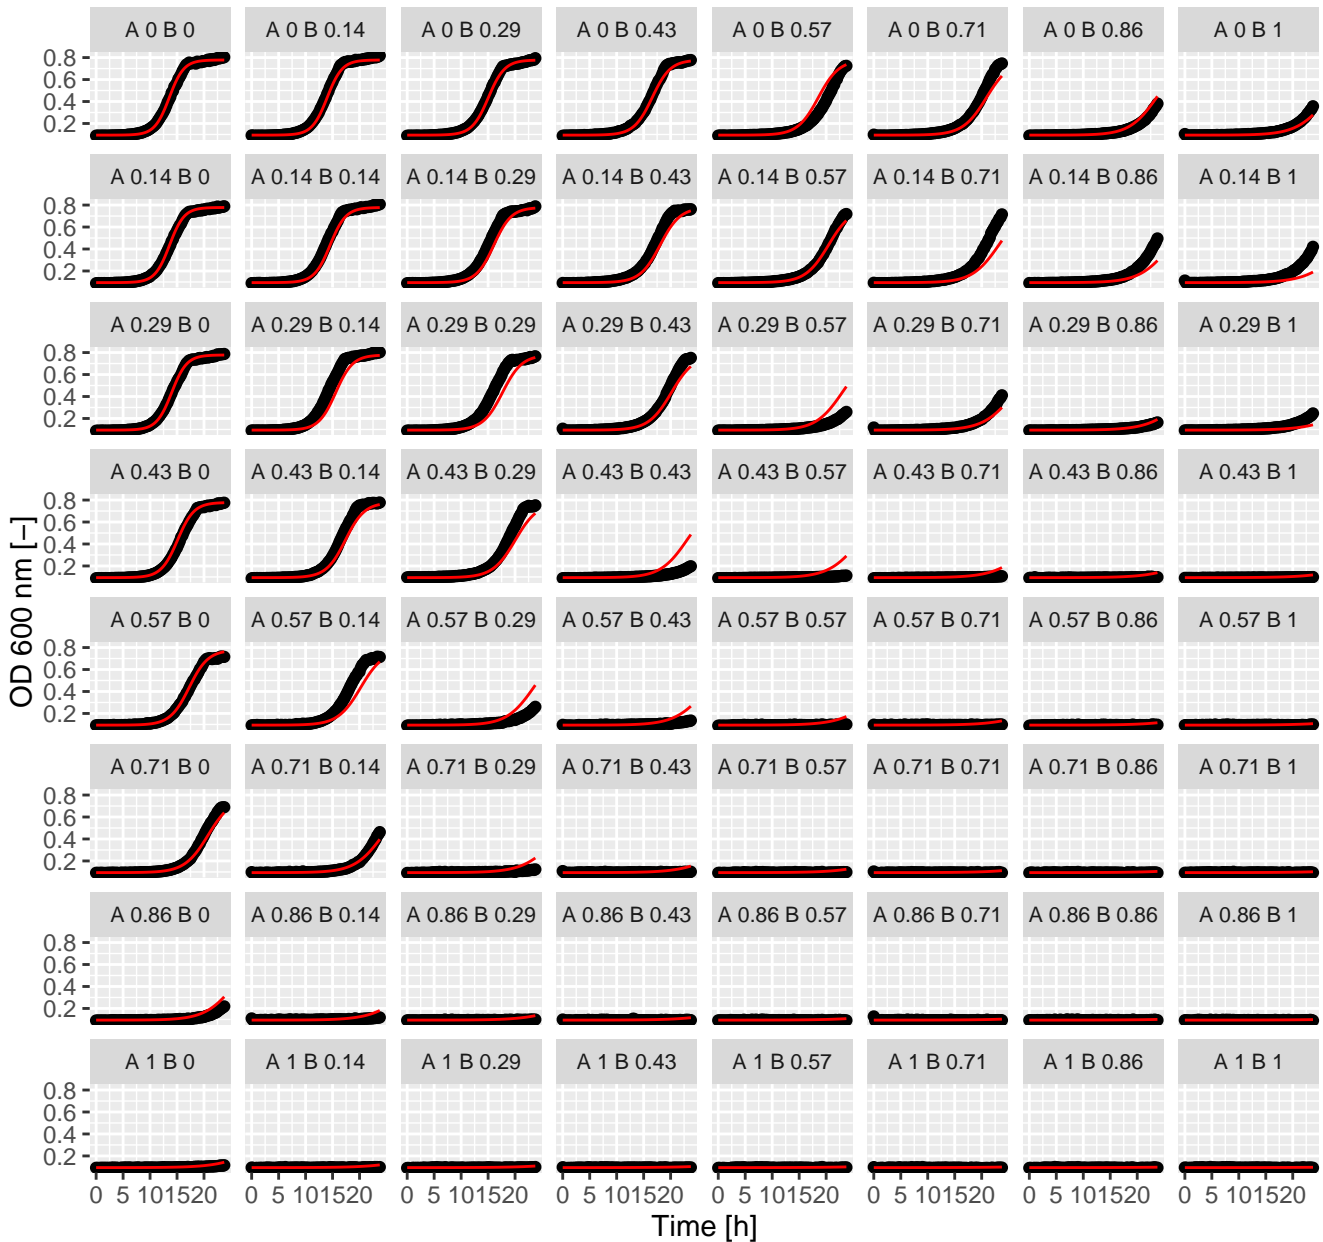

Sta.Ter (= Ax.Bx) Greco  
alpha = 4.03

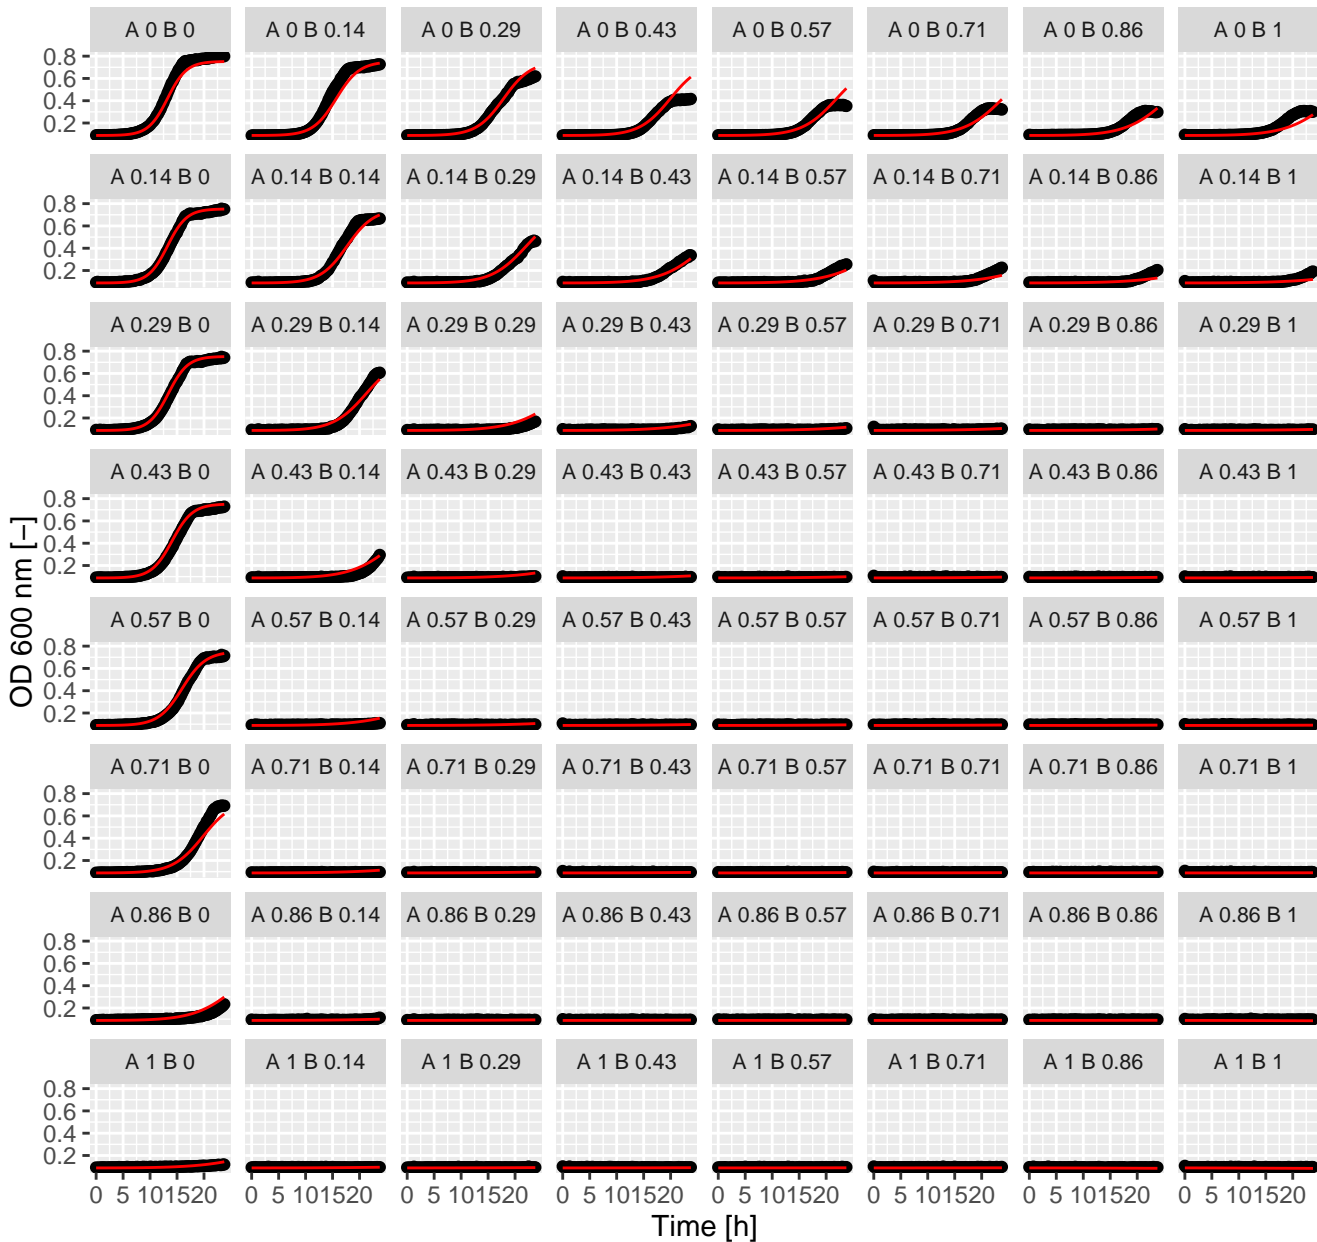

Sta.Tam (= Ax.Bx) Greco  
alpha = 0.72

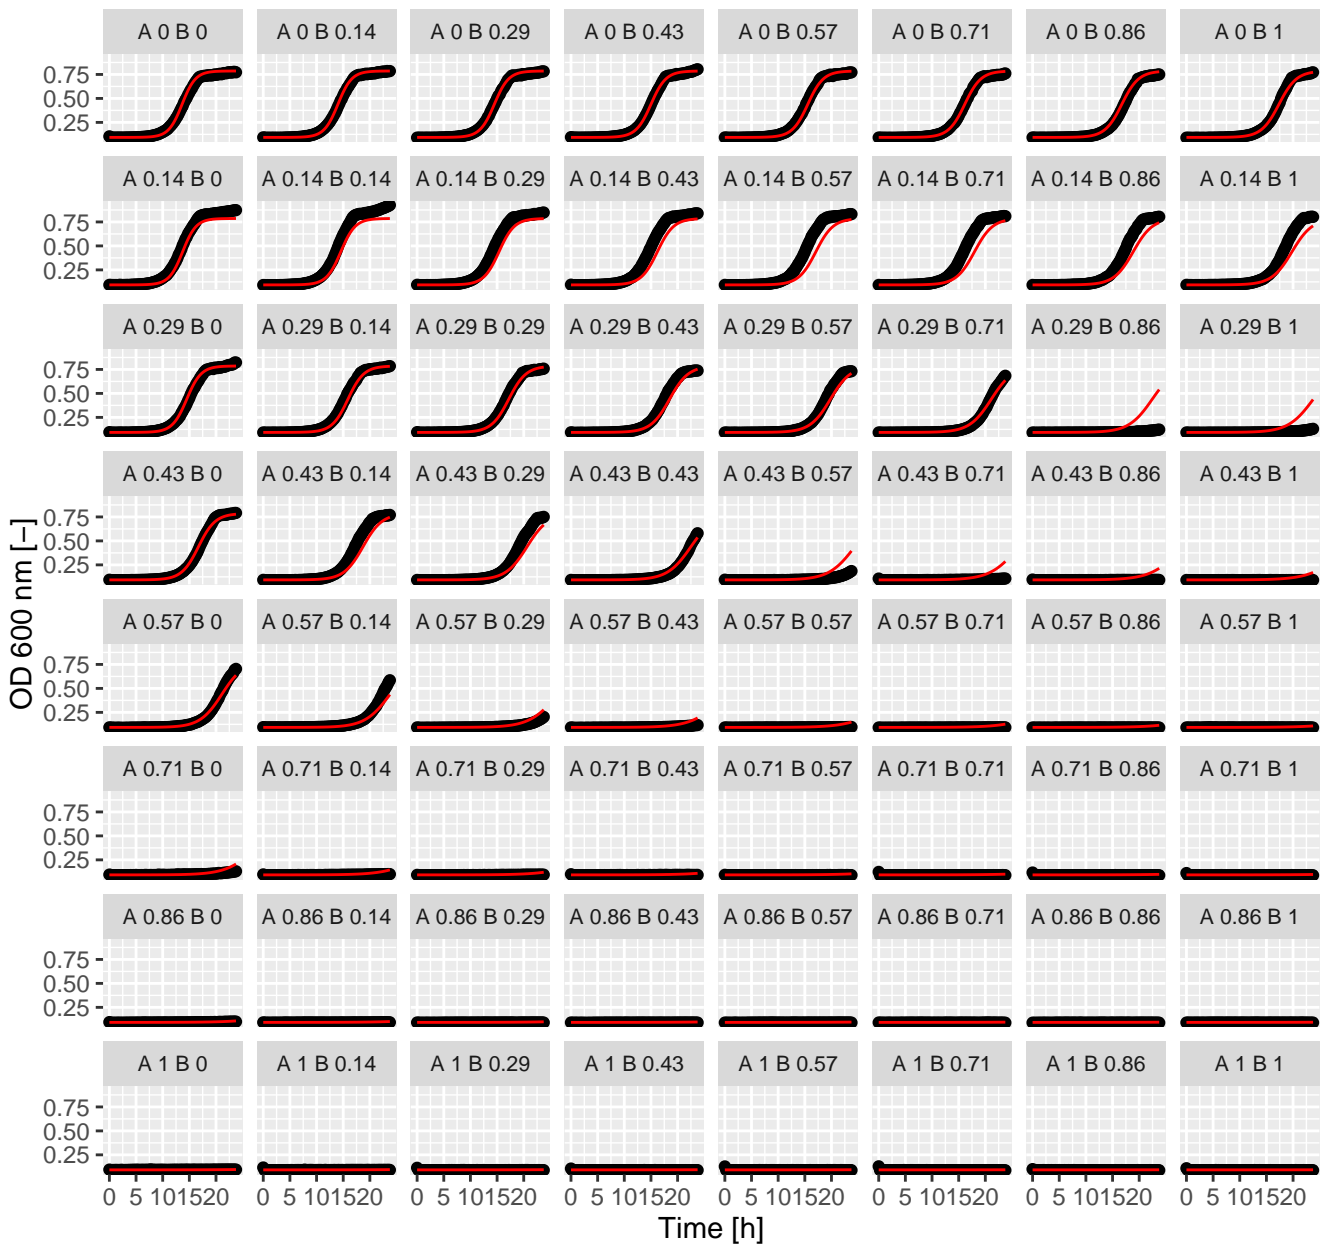

Sta.Tac (= Ax.Bx) Greco  
 $\alpha = 24.55$

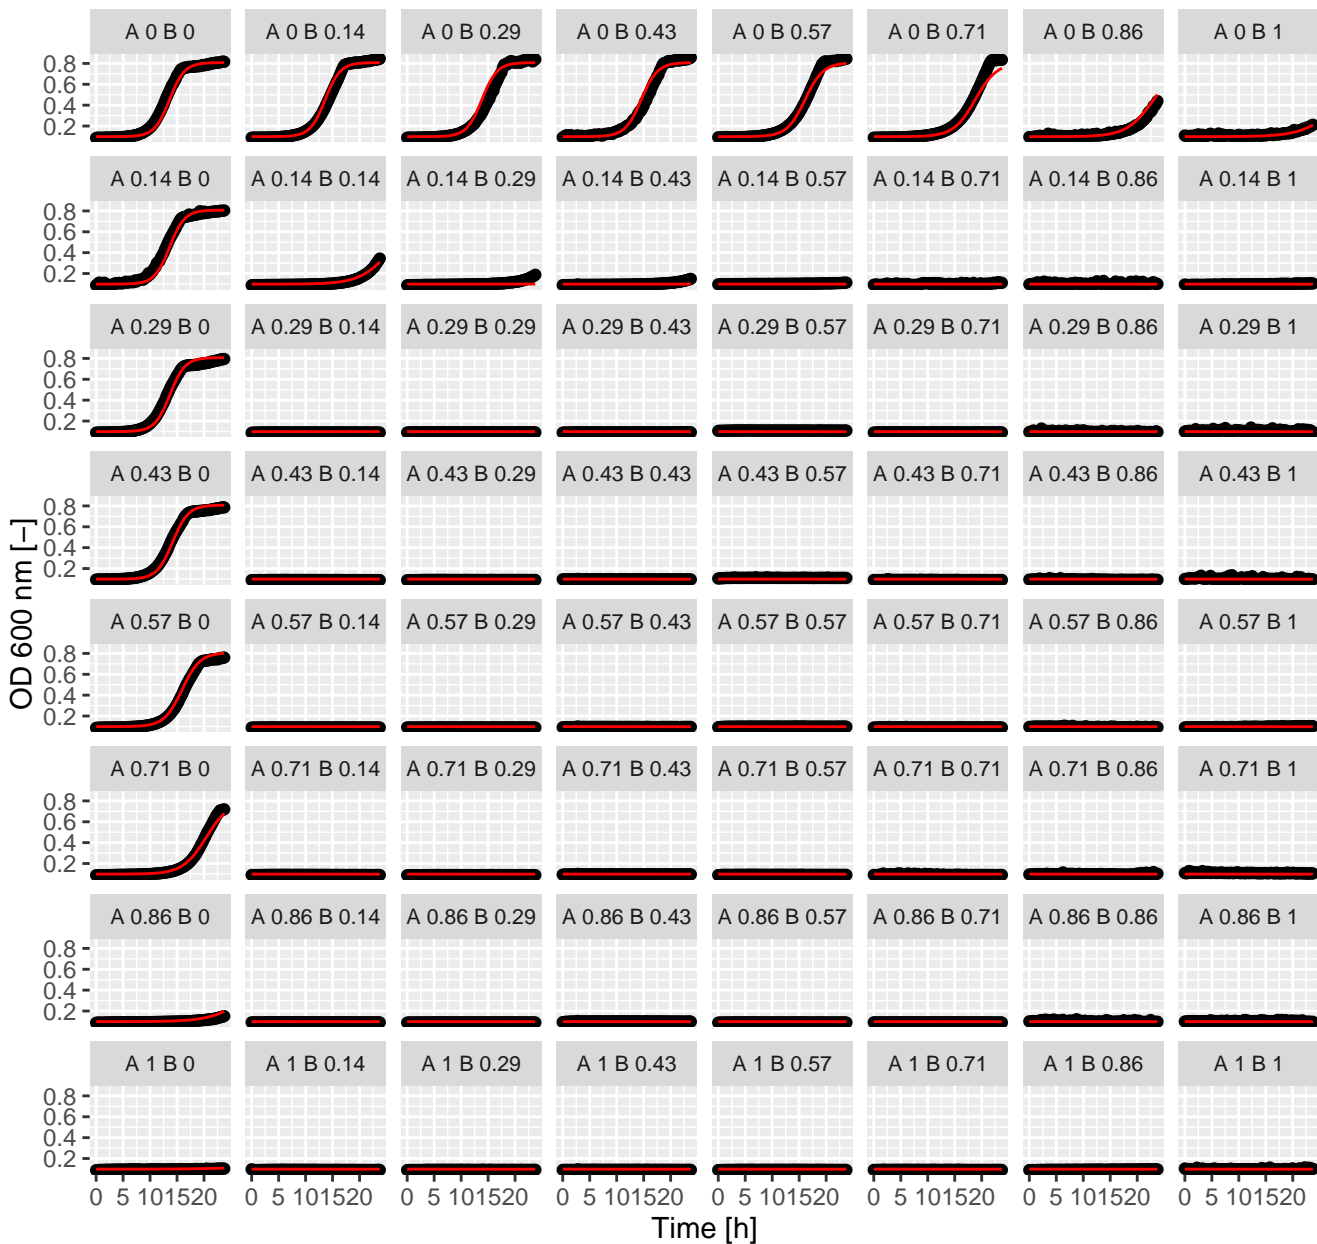

Sta.Sta (= Ax.Bx) Greco  
alpha = 0.82

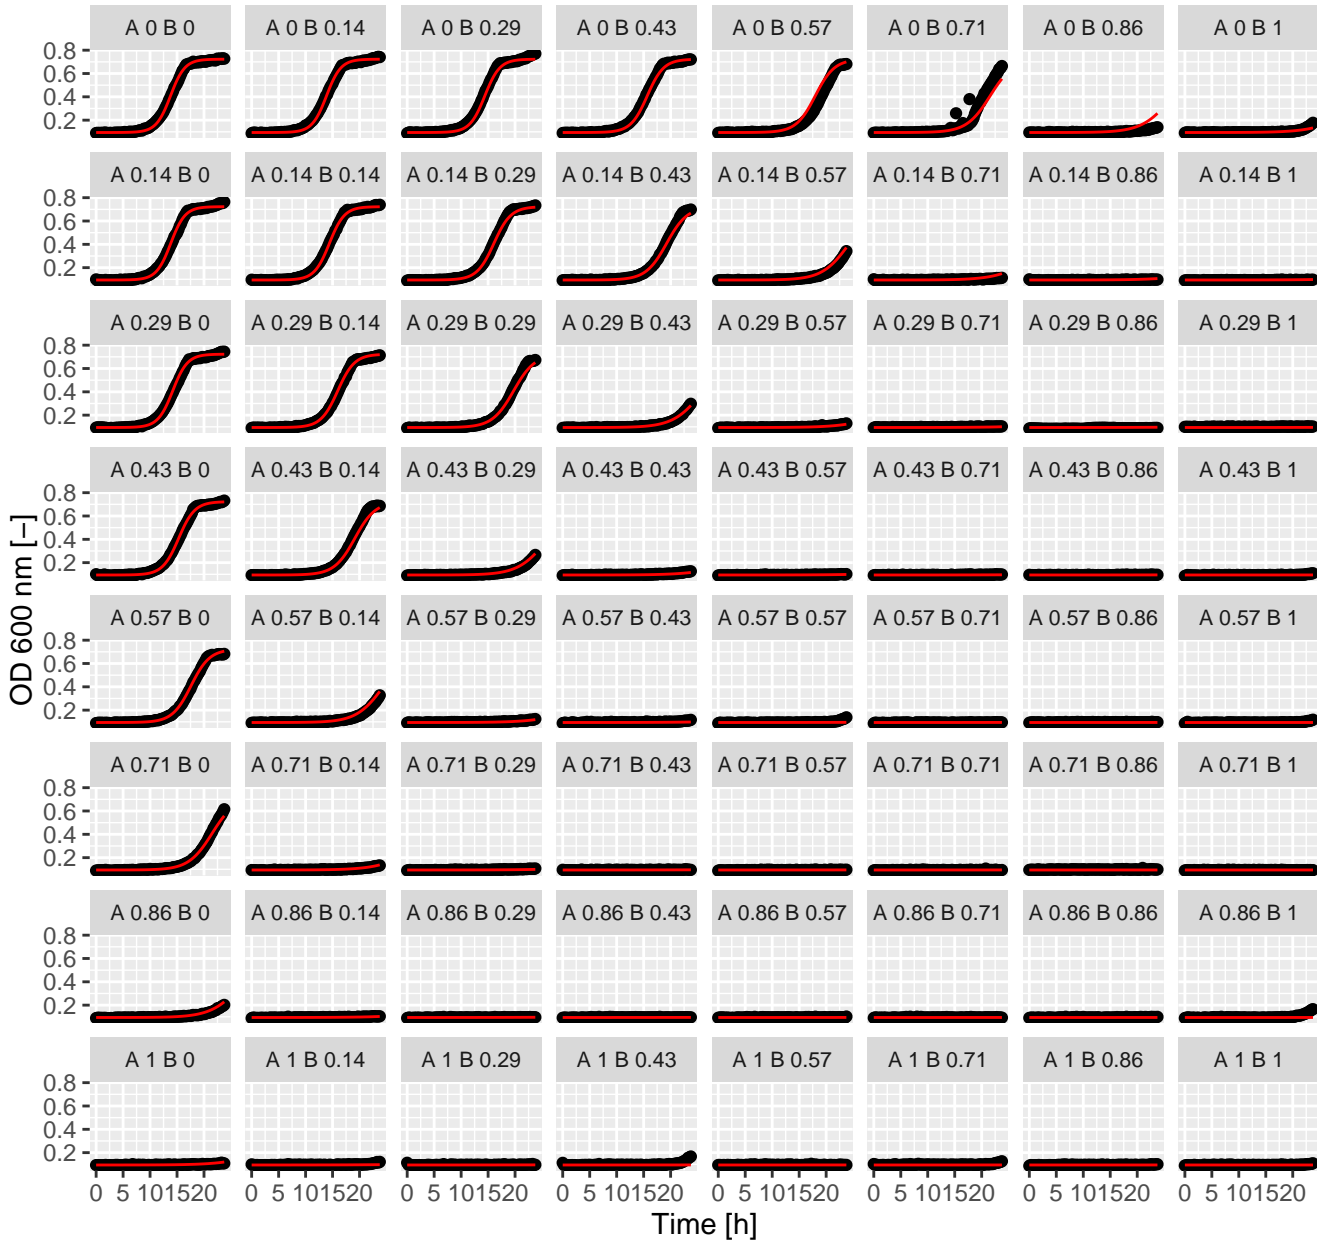



Rap.Tun (= Ax.Bx) Greco  
 $\alpha = -0.9$

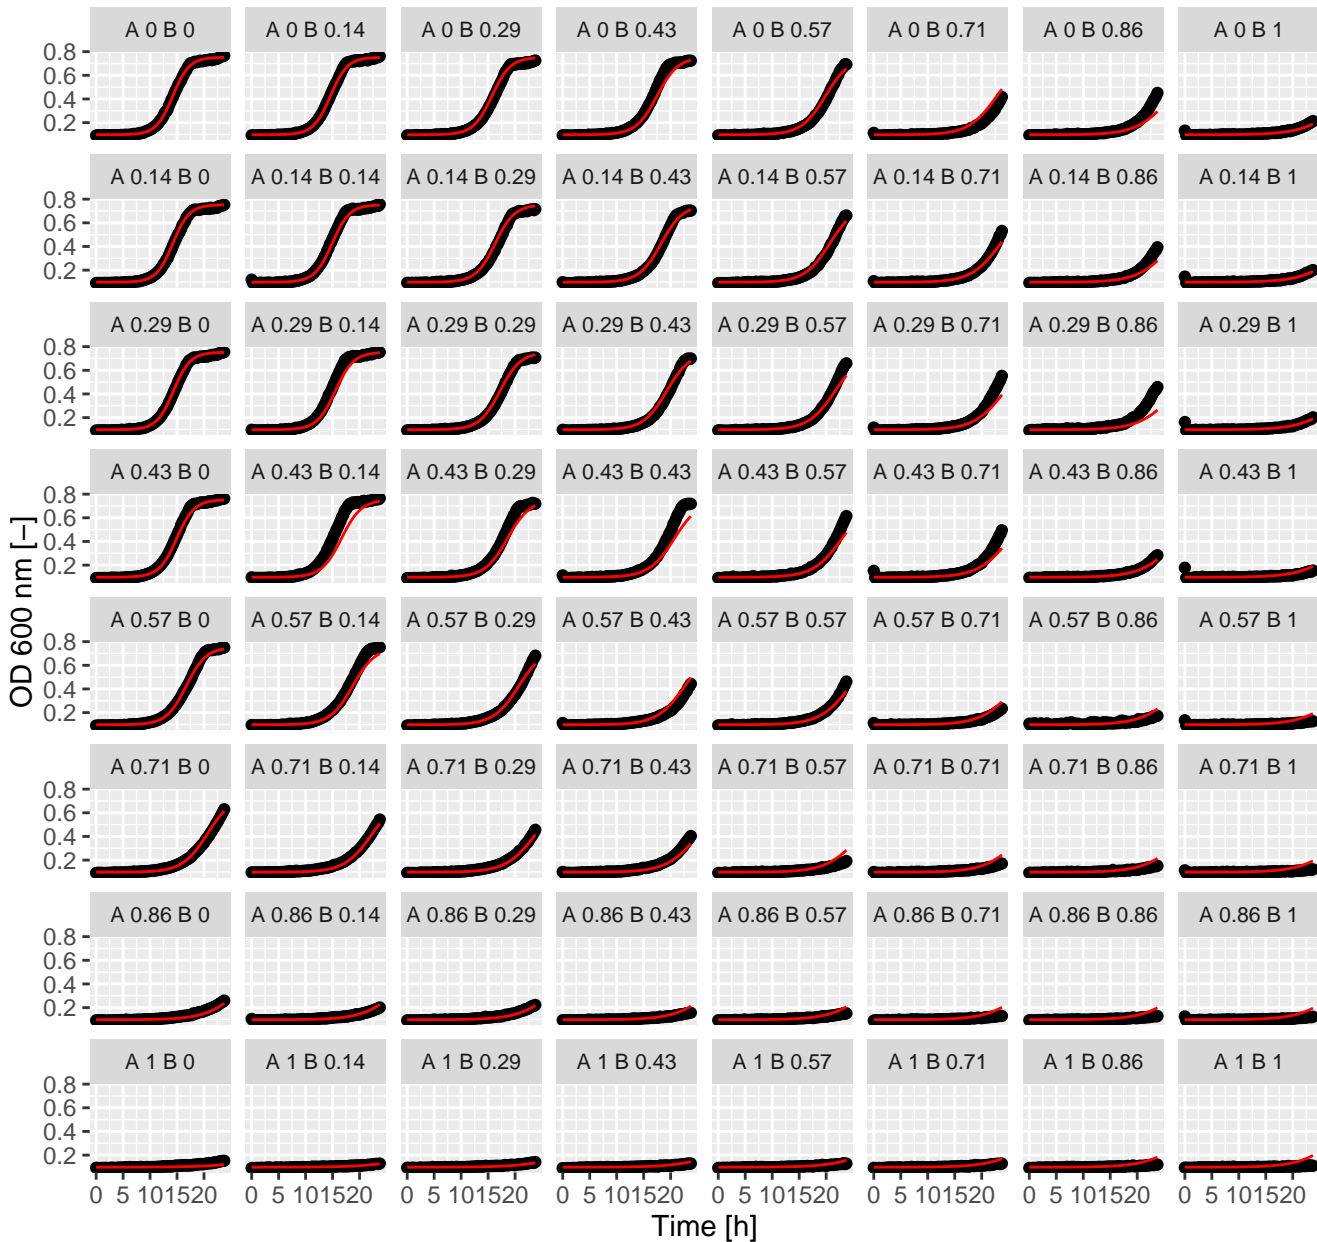

Rap.Ter (= Ax.Bx) Greco  
alpha = 0.17

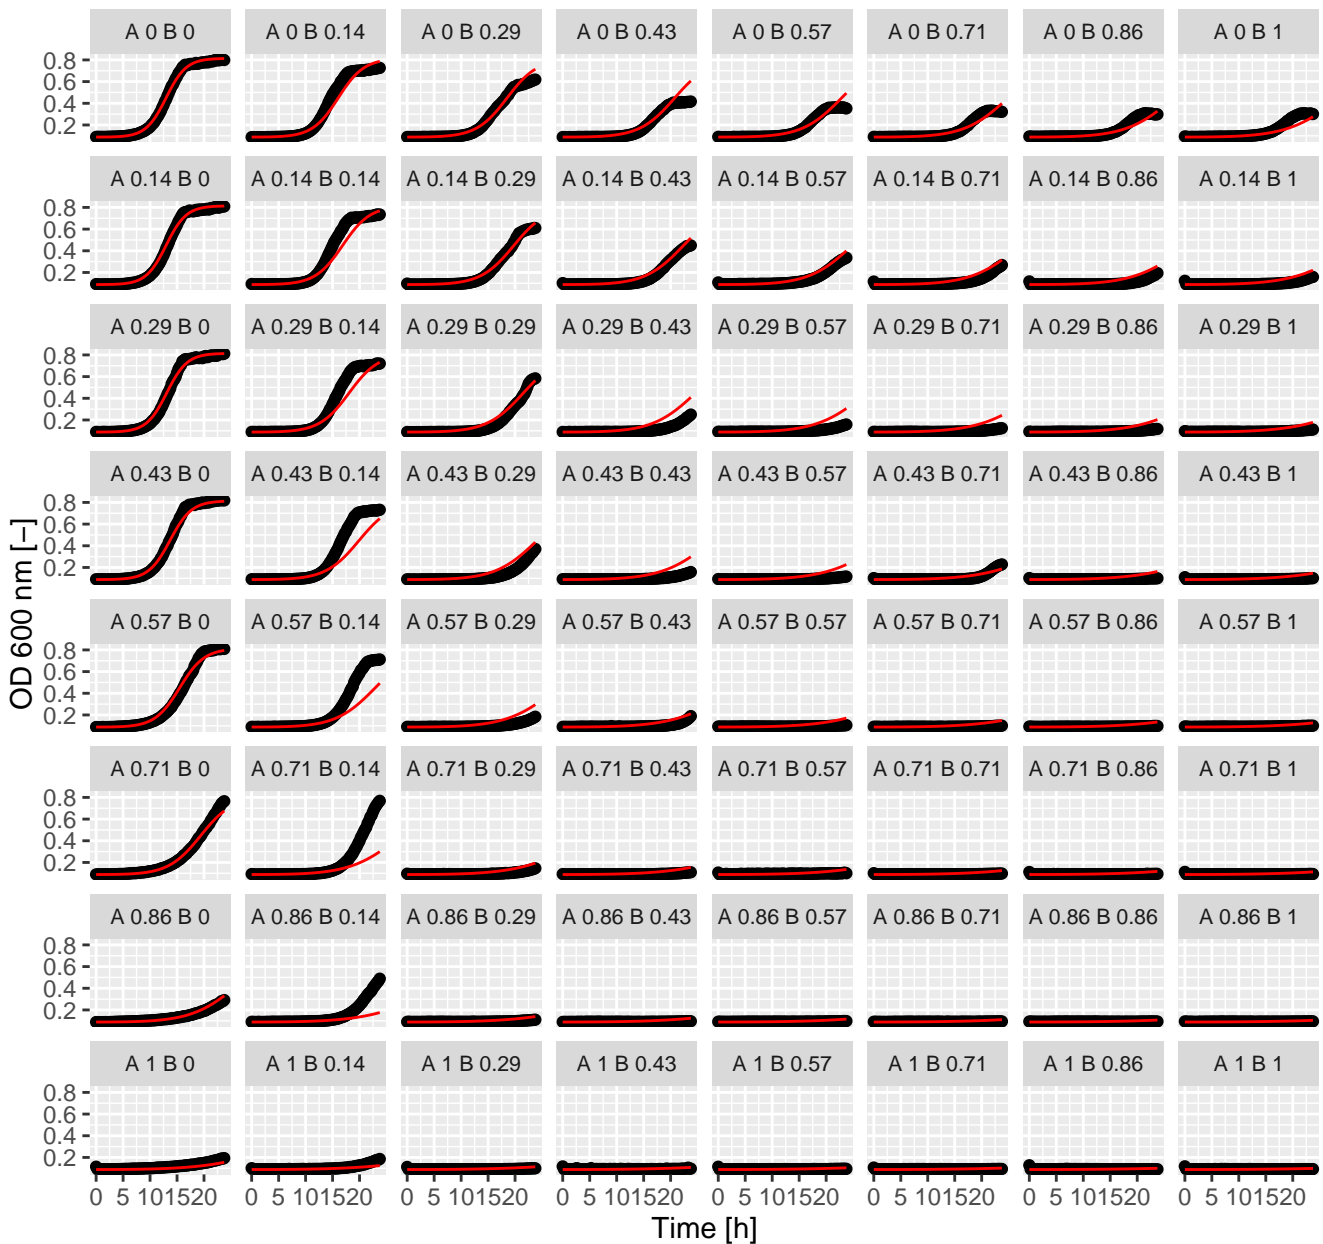

Rap.Tac (= Ax.Bx) Greco  
 $\alpha = -1.15$

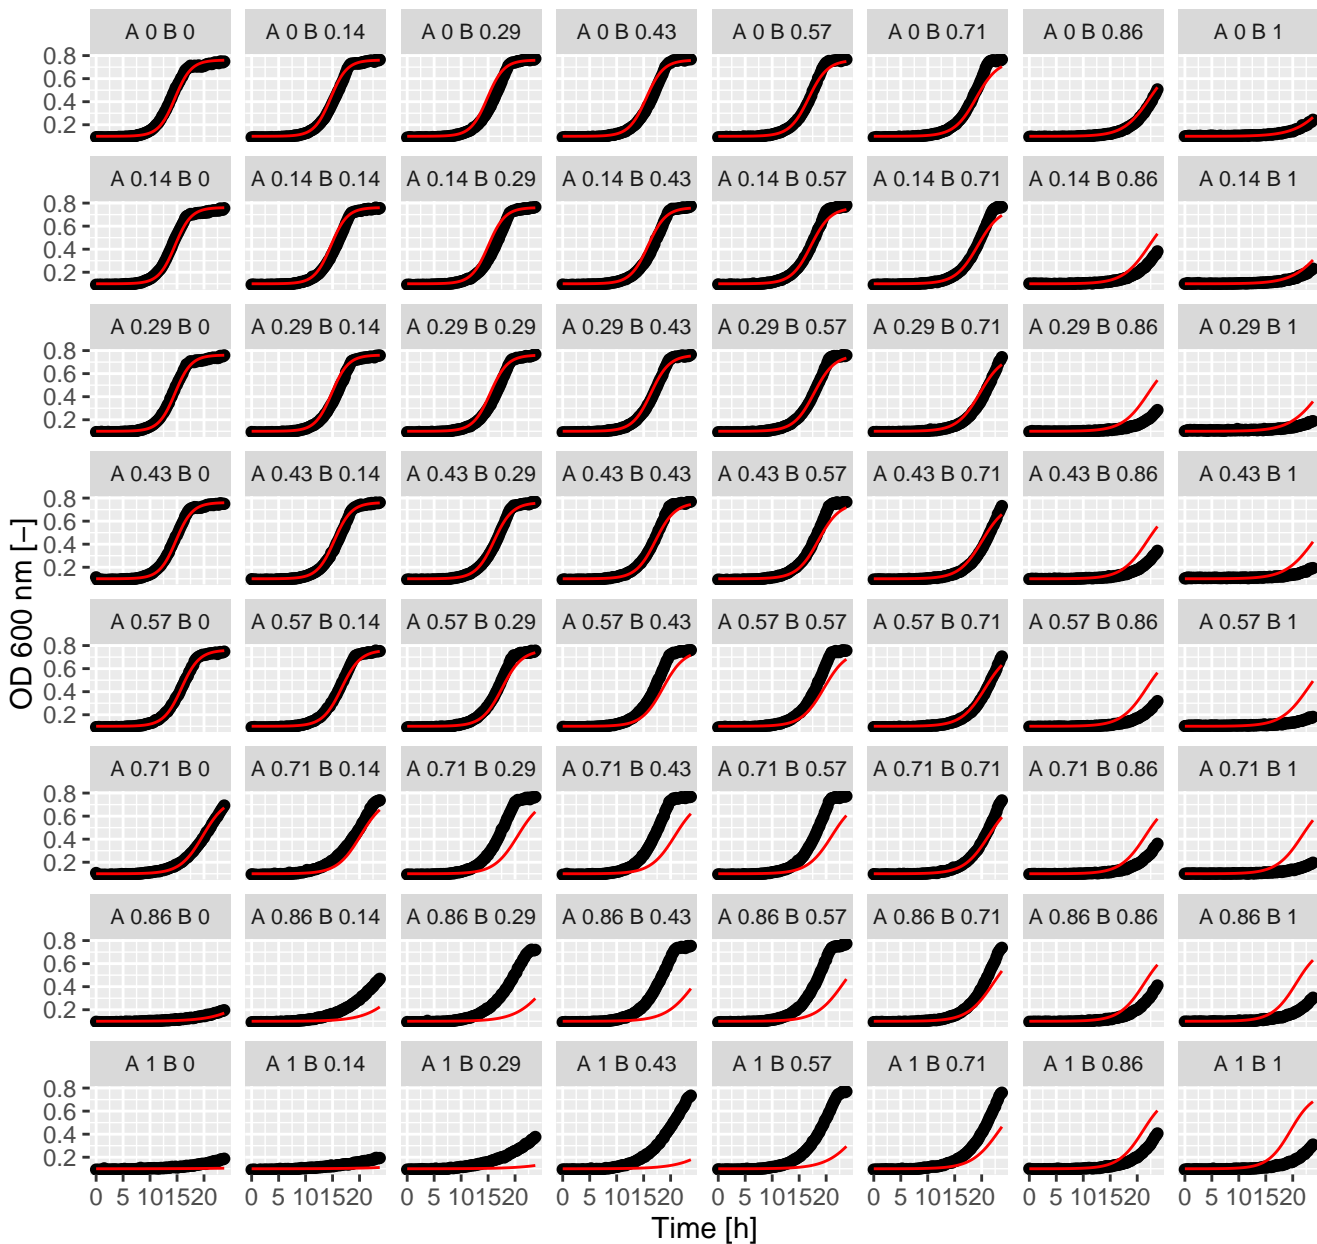

Rap.Sta (= Ax.Bx) Greco  
 $\alpha = -0.52$

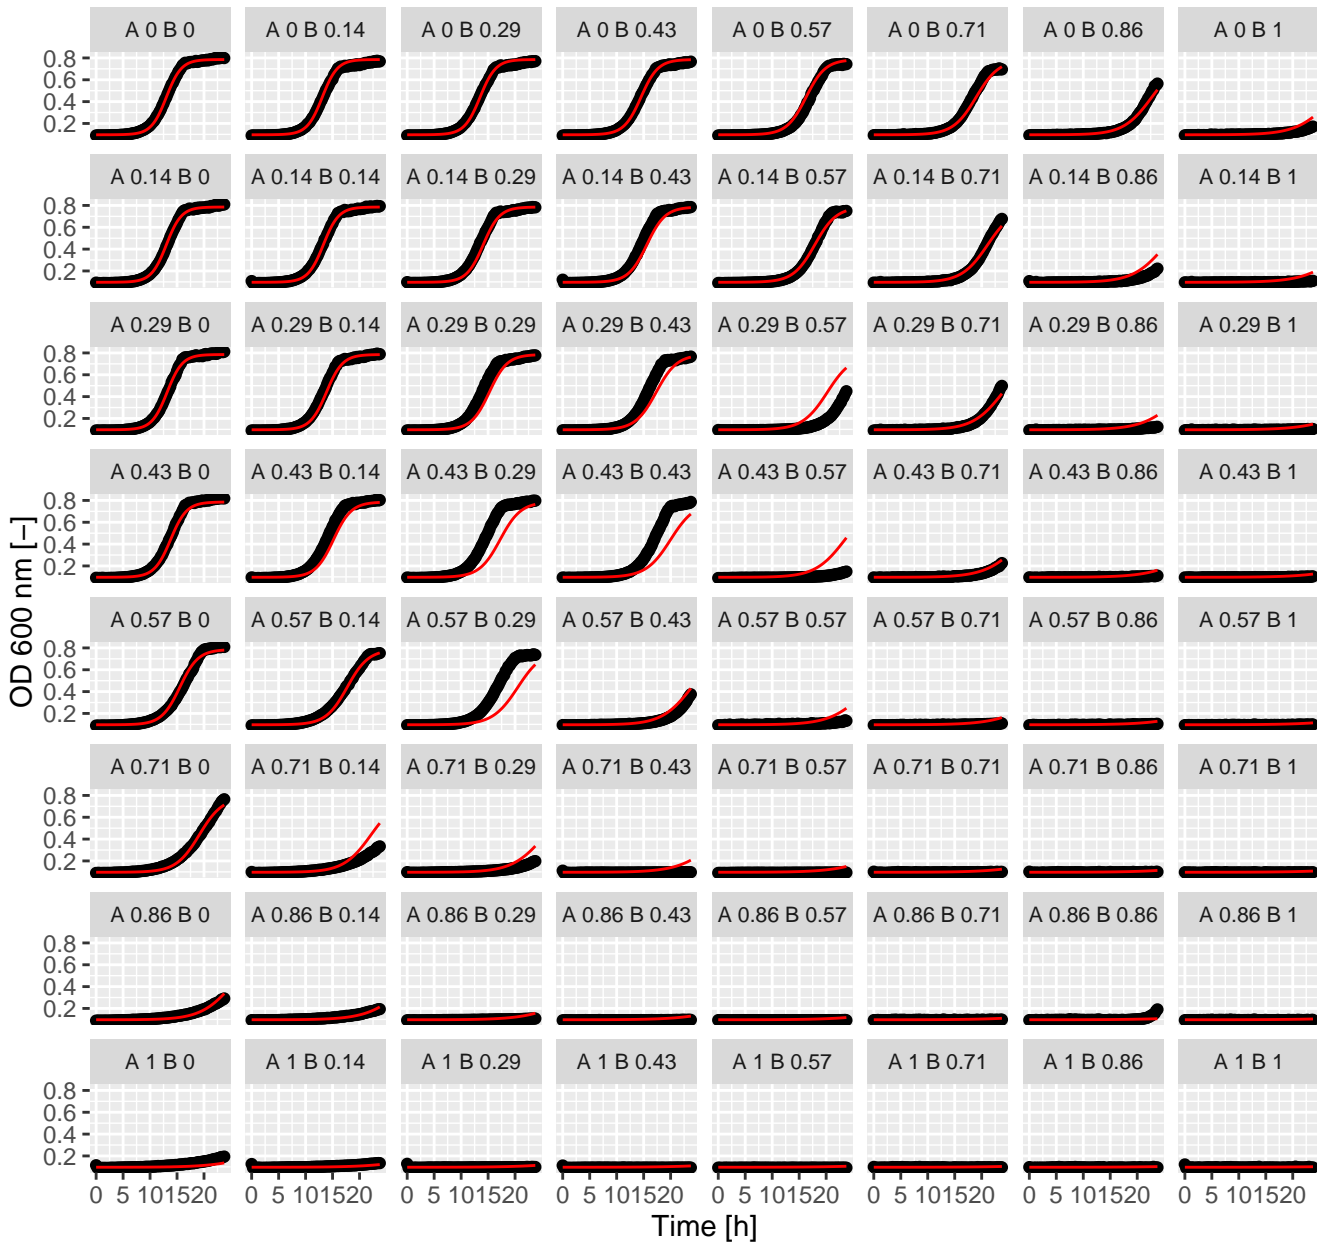

Rap.Rap (= Ax.Bx) Greco  
alpha = 0.26

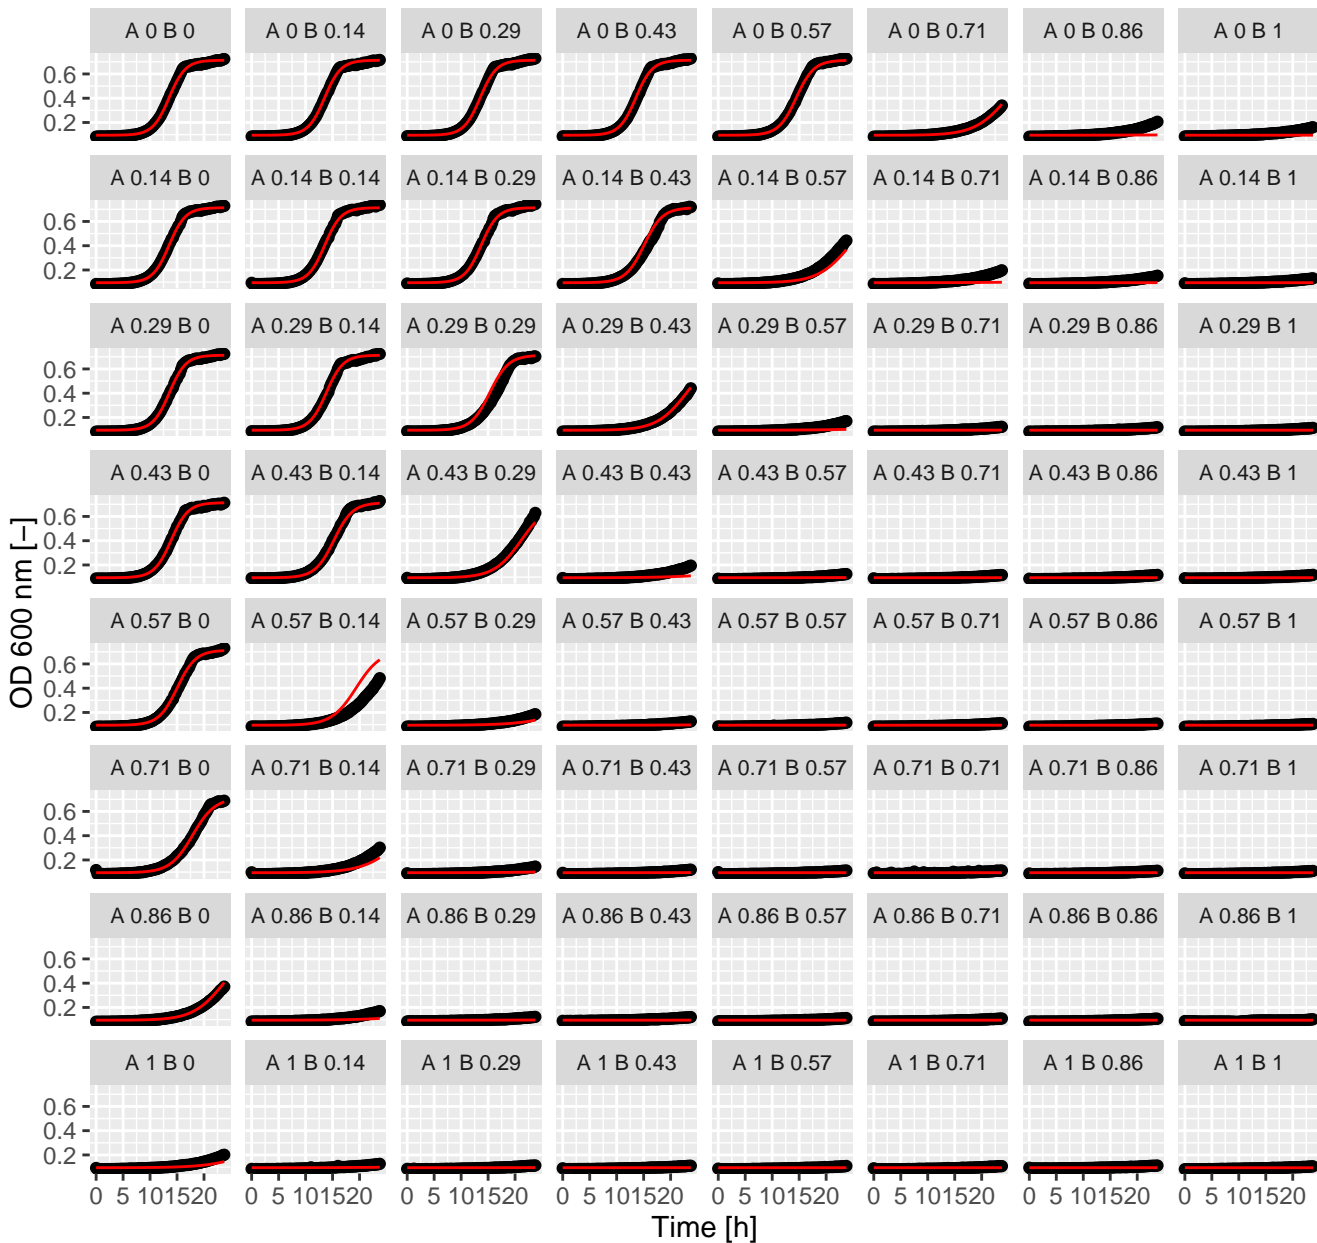

Rad.Ter (= Ax.Bx) Greco  
alpha = 3.6

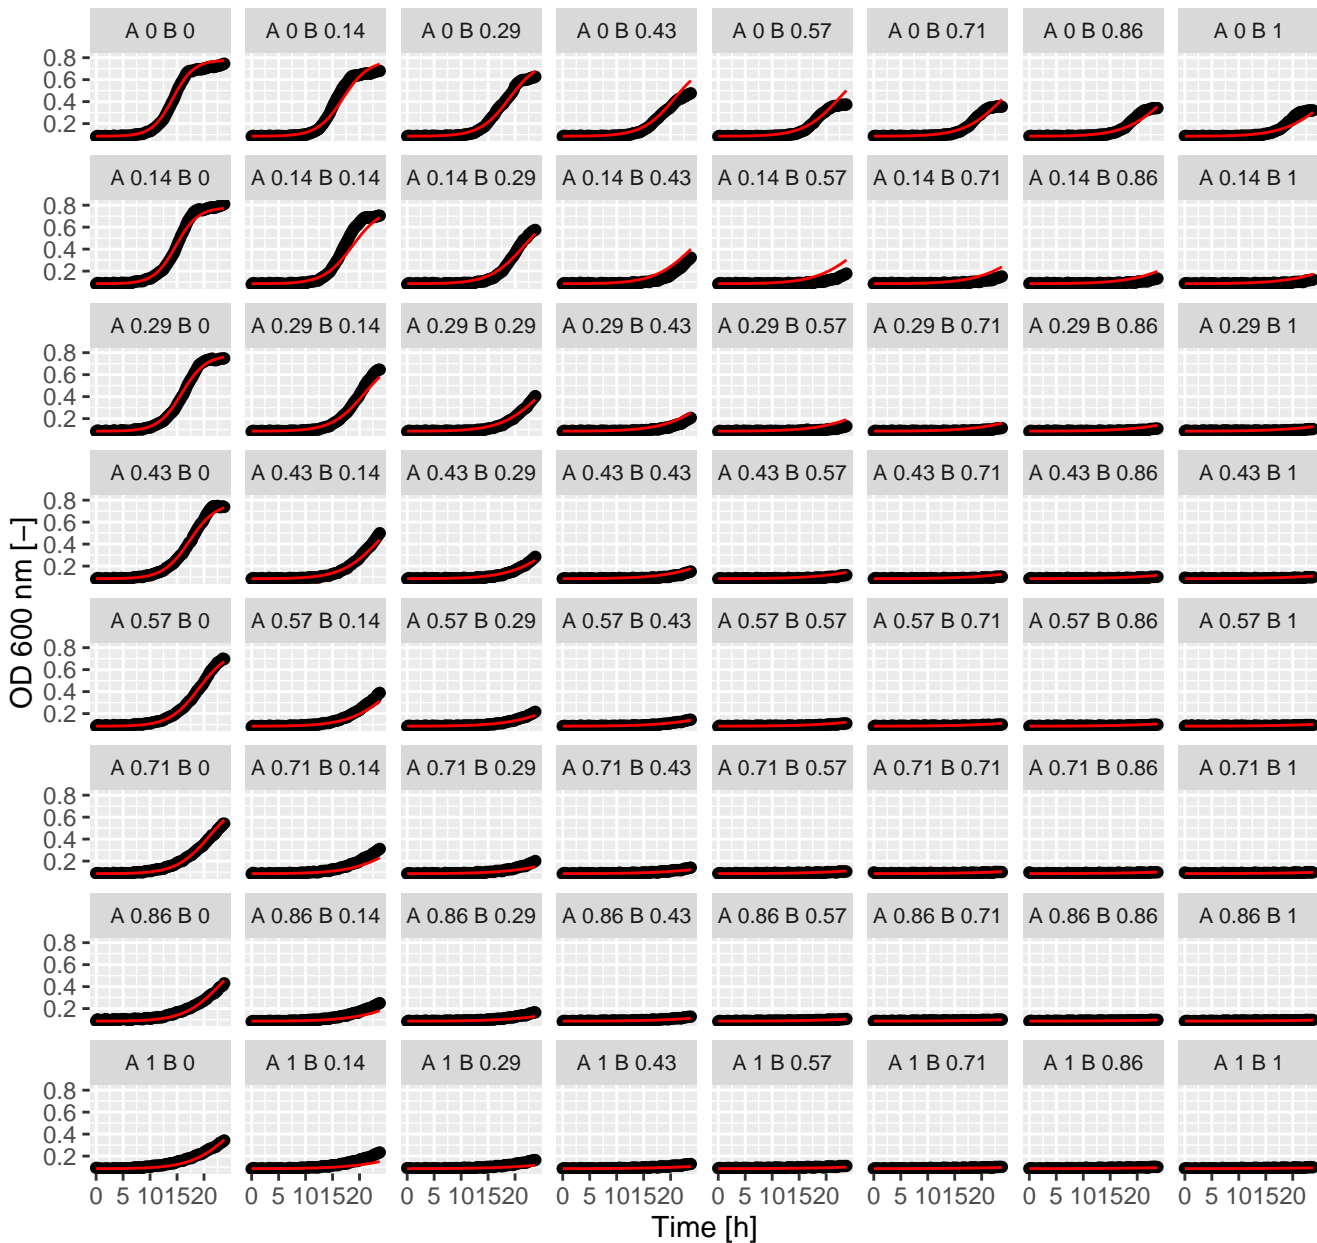

Rad.Tac (= Ax.Bx) Greco  
alpha = 3.27

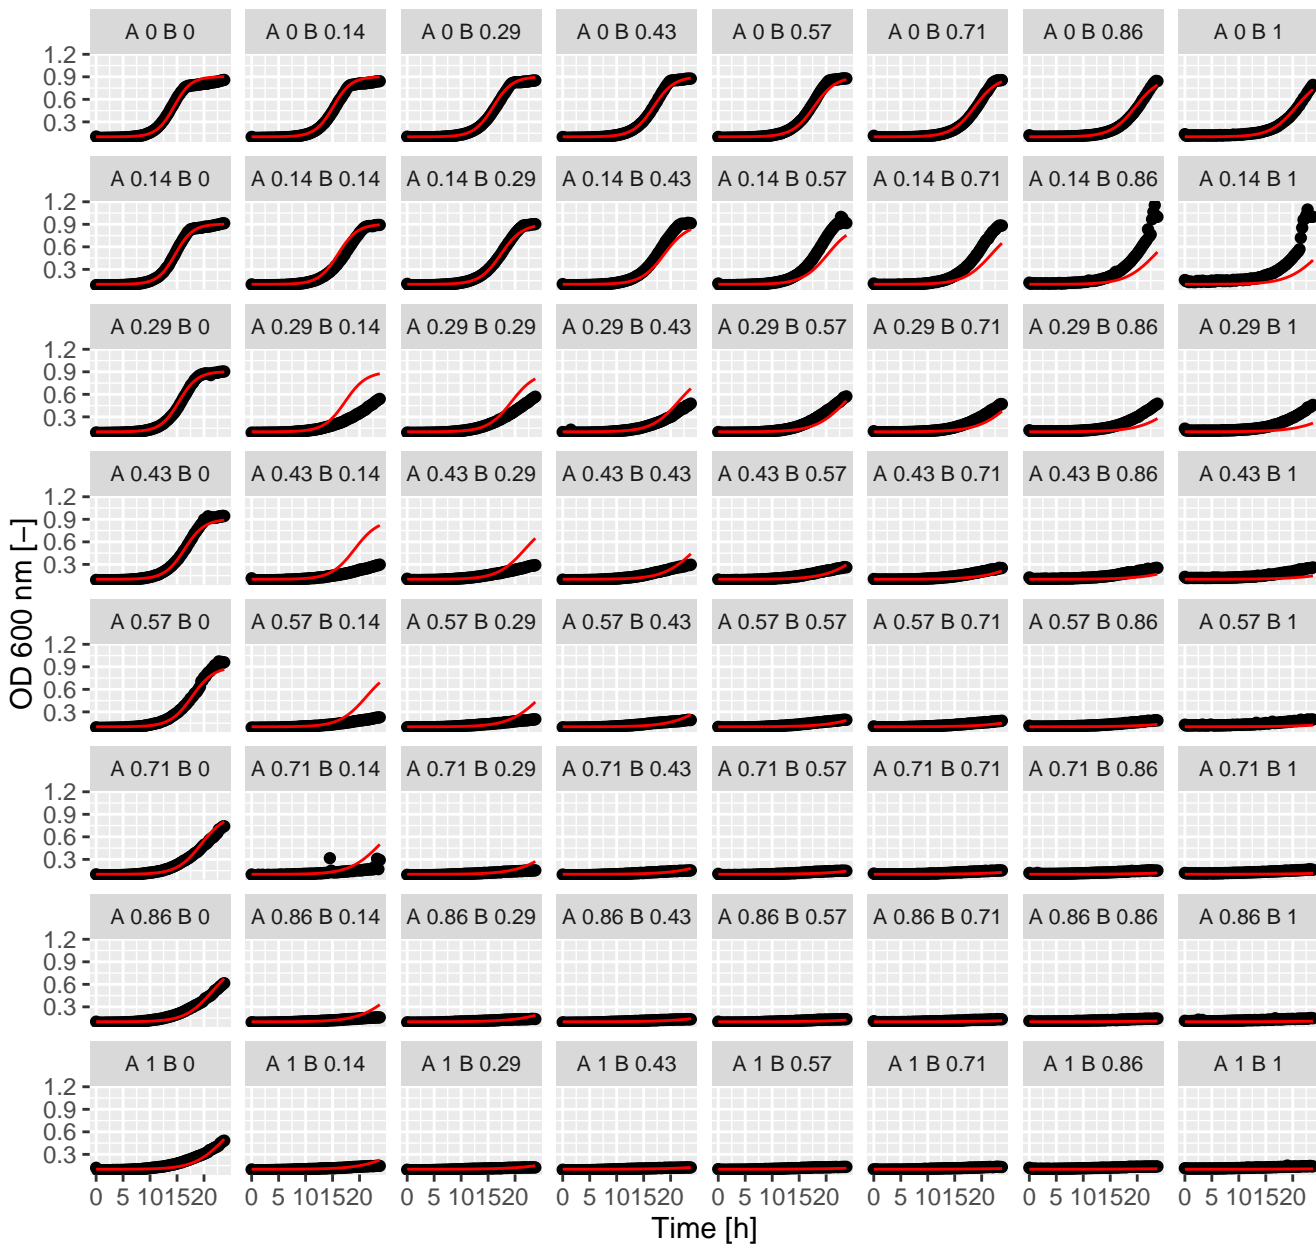

Rad.Sta (= Ax.Bx) Greco  
 $\alpha = -1.03$

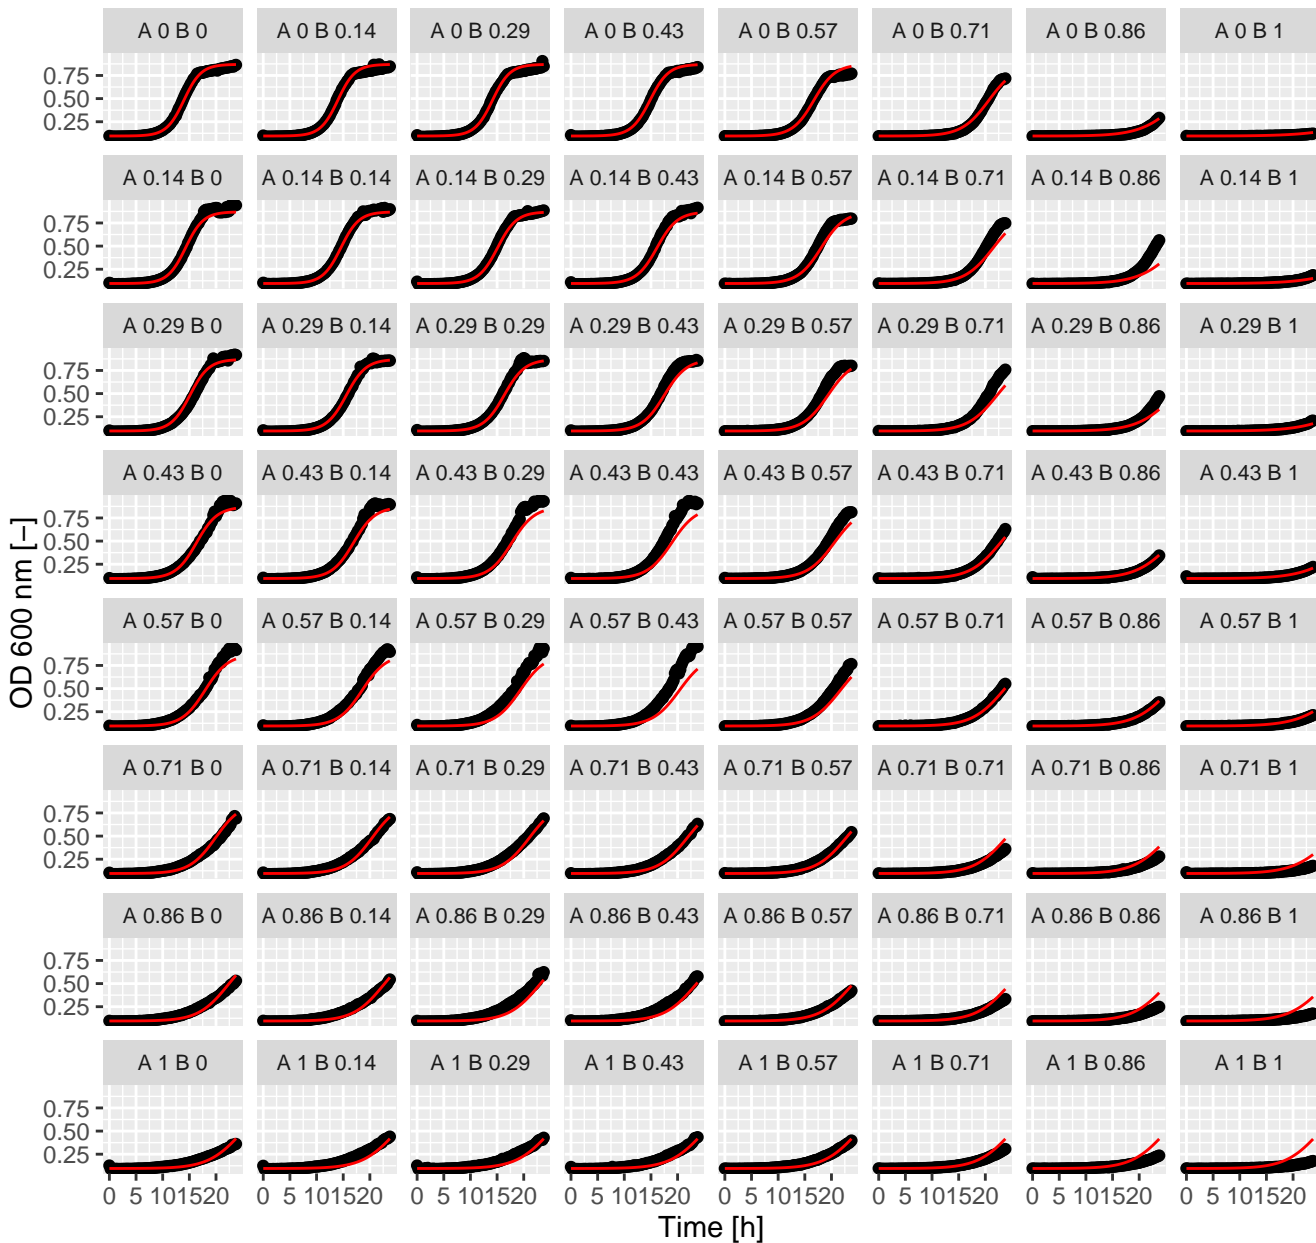



Rad.Rap (= Ax.Bx) Greco  
alpha = -0.35

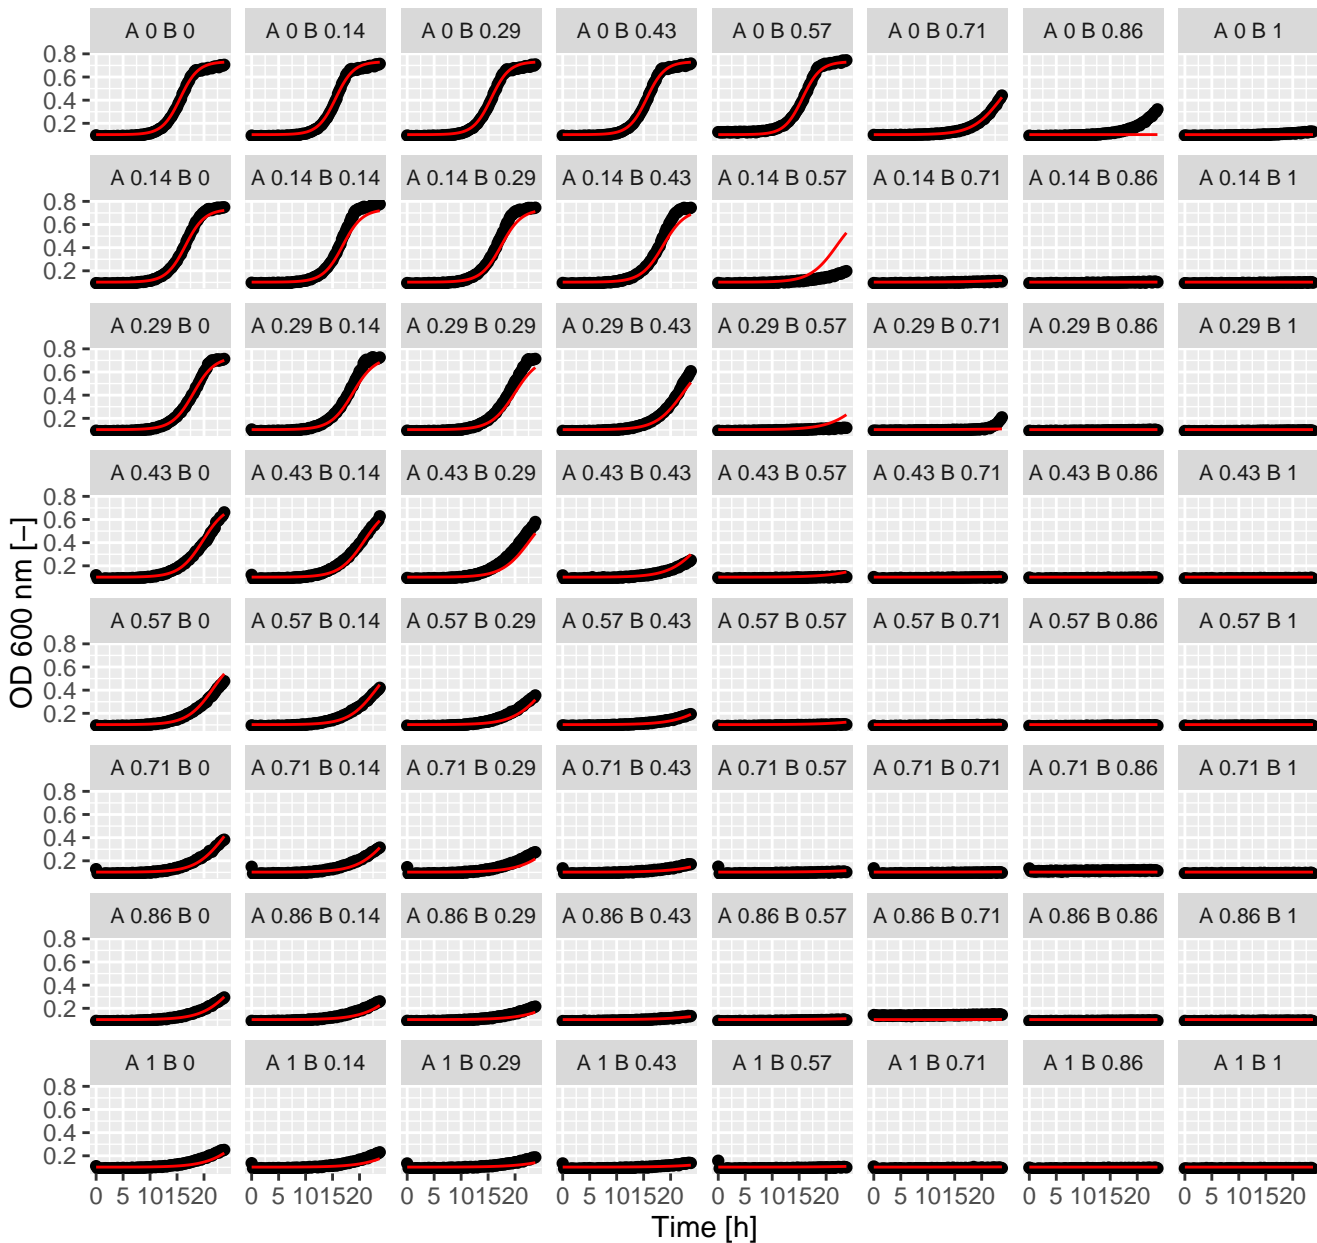

Qnn.Rad (= Ax.Bx) Greco  
alpha = 0.27

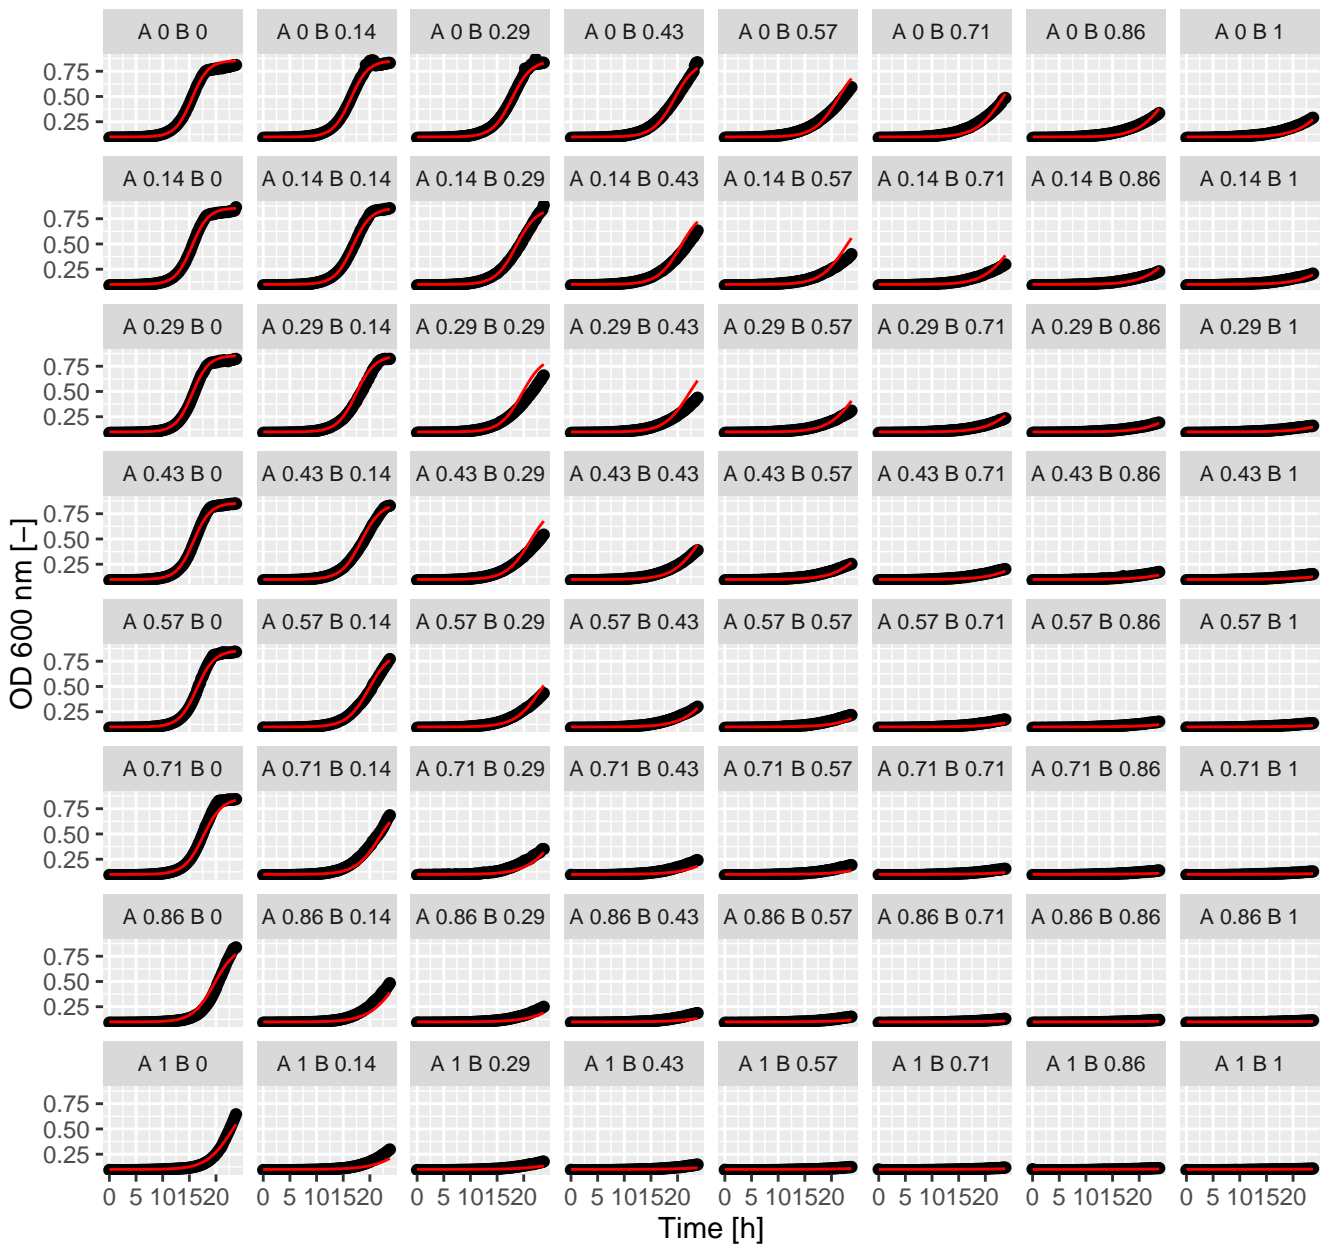

Qmy.Ter (= Ax.Bx) Greco  
 $\alpha = 15.83$

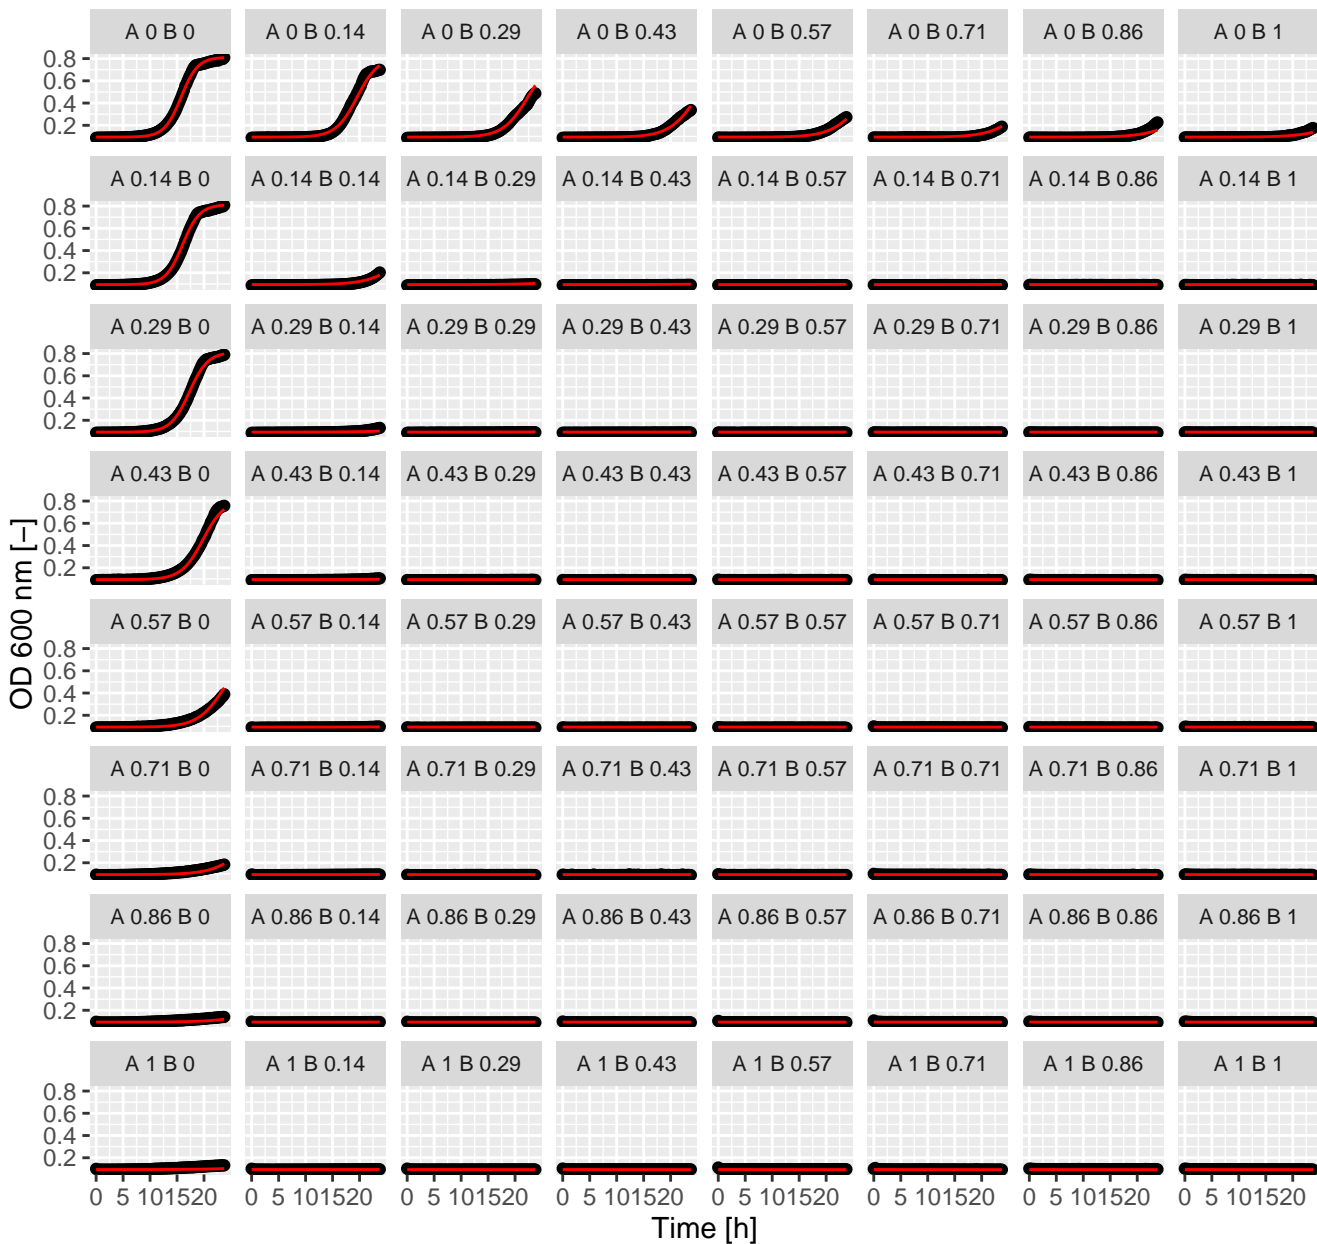

Qmy.Tac (= Ax.Bx) Greco  
 $\alpha = -0.75$

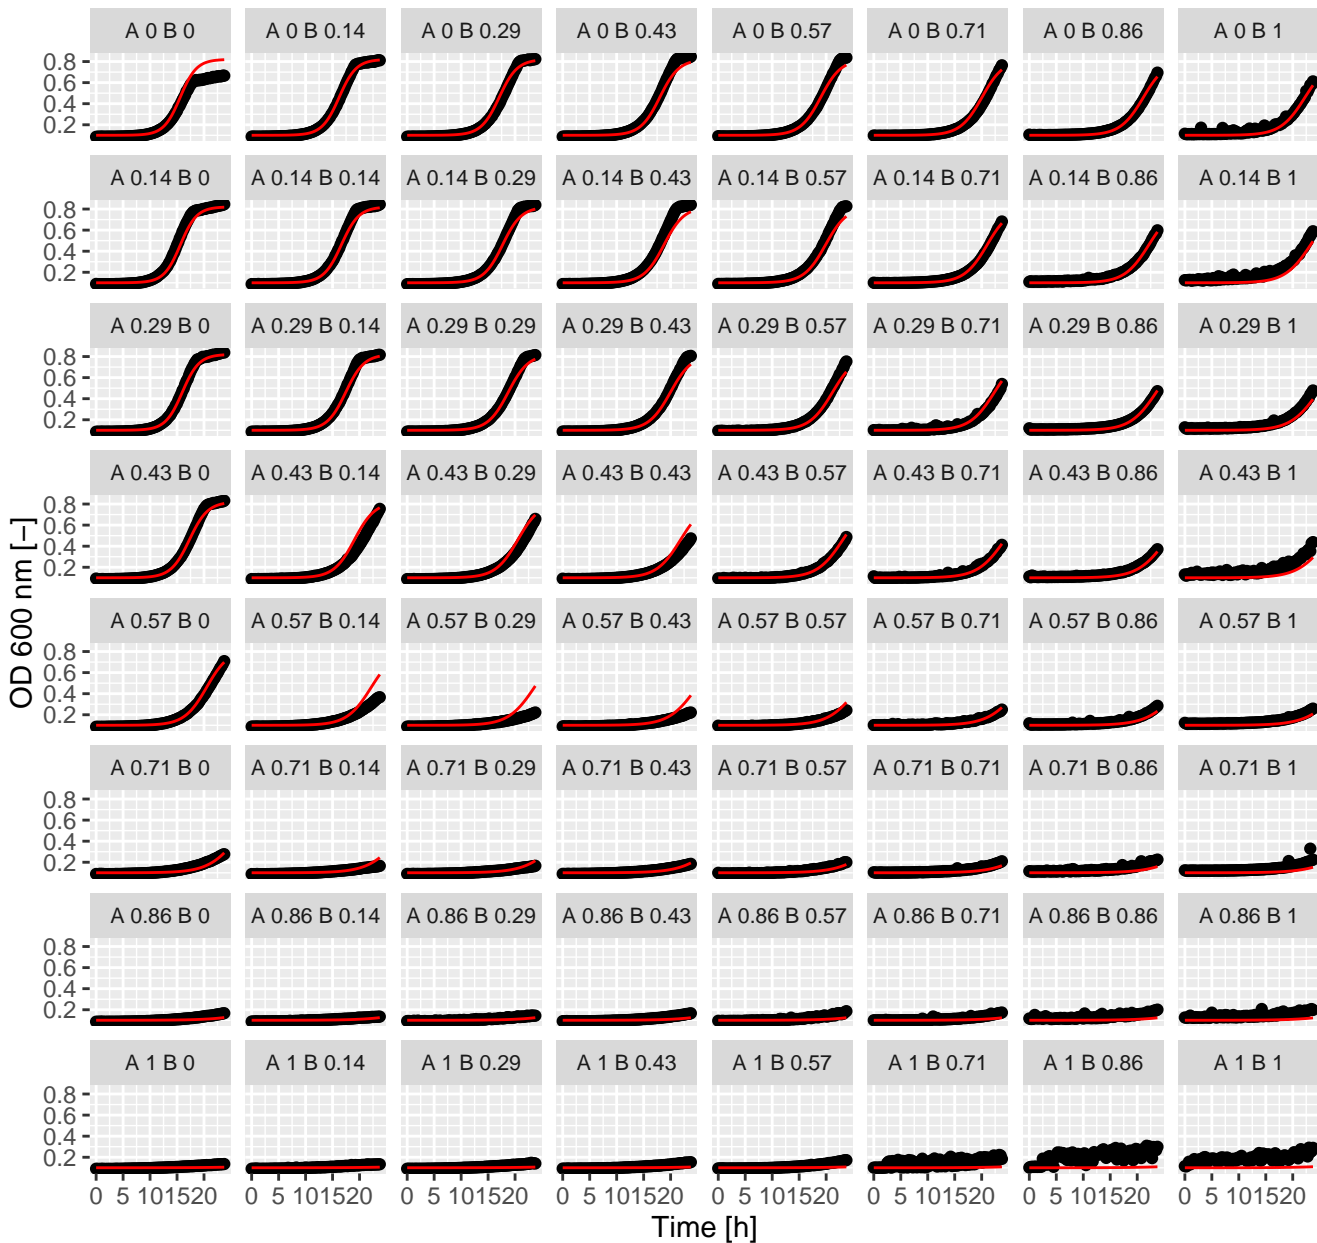

Qmy.Sta (= Ax.Bx) Greco  
 $\alpha = -0.95$

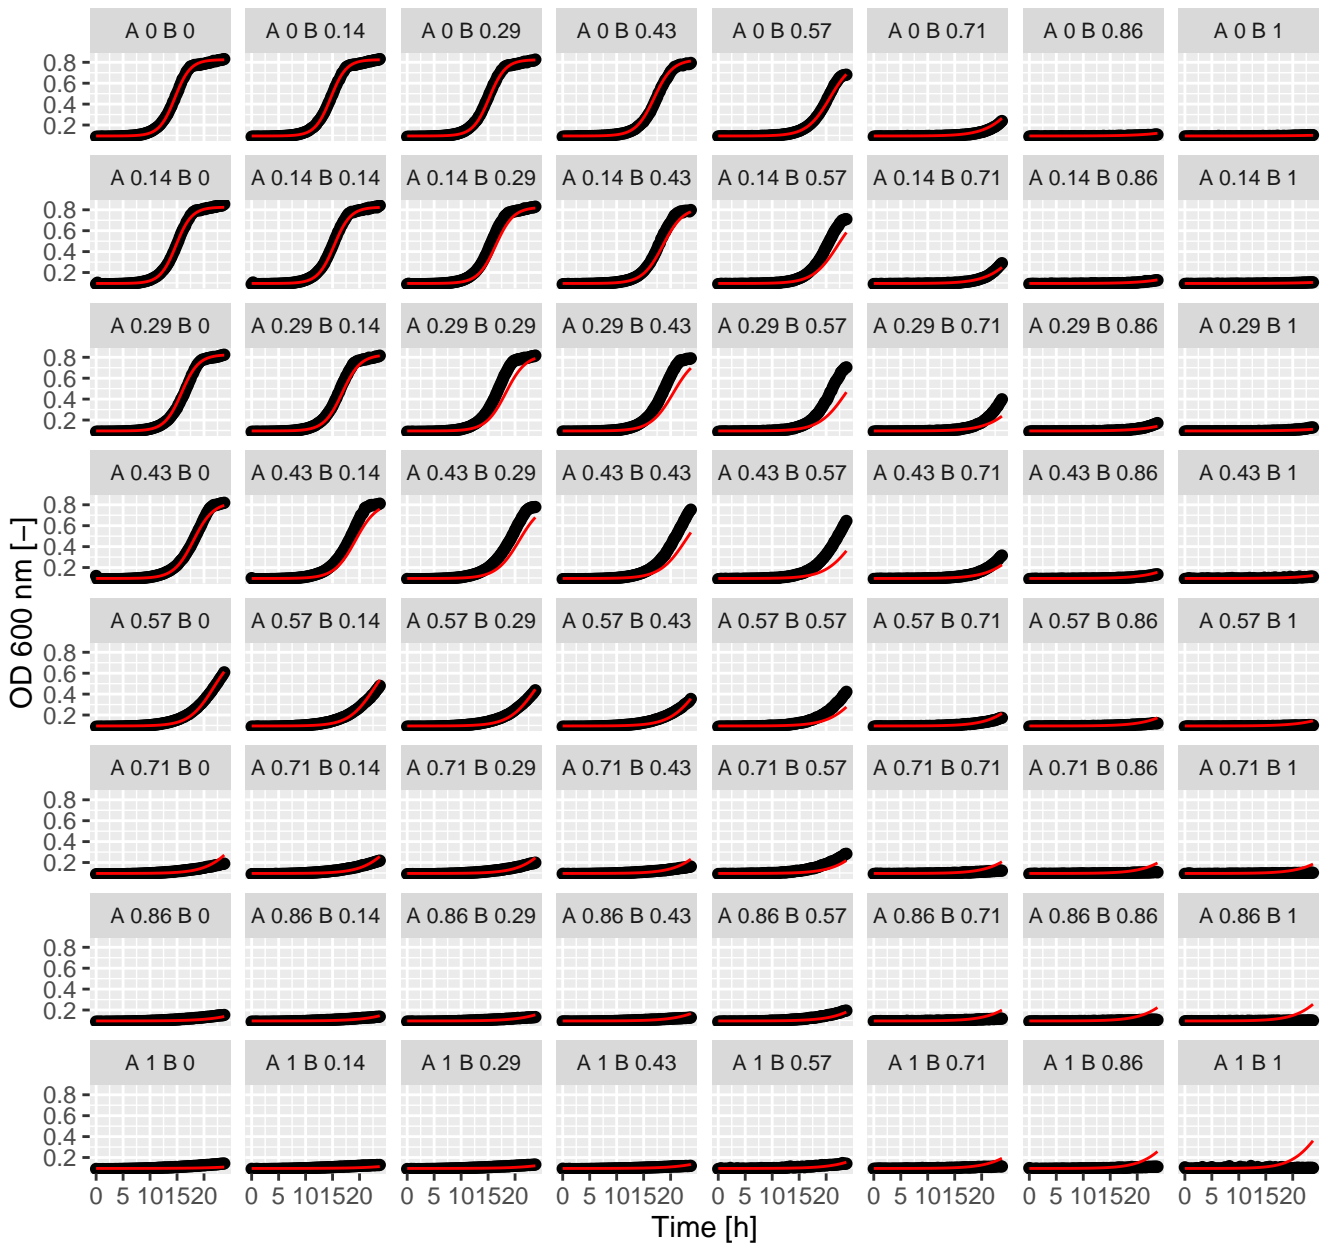

Qmy.Qmy (= Ax.Bx) Greco  
alpha = -0.03

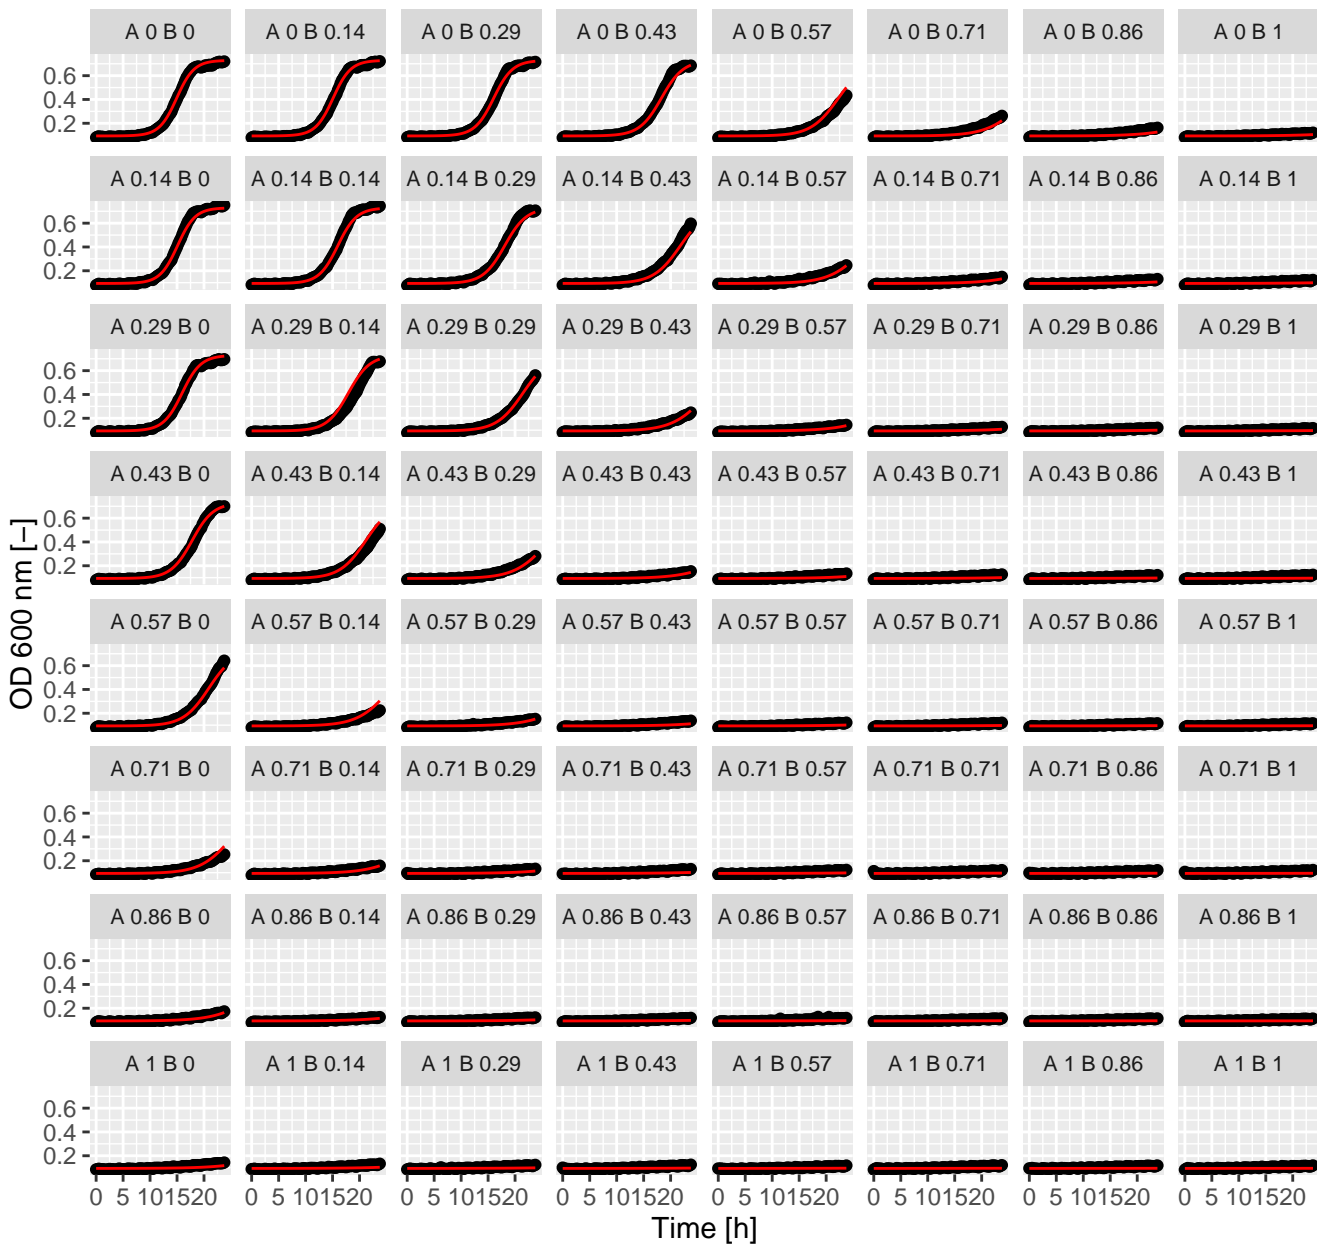

Pen.Tun (= Ax.Bx) Greco  
alpha = 0.08

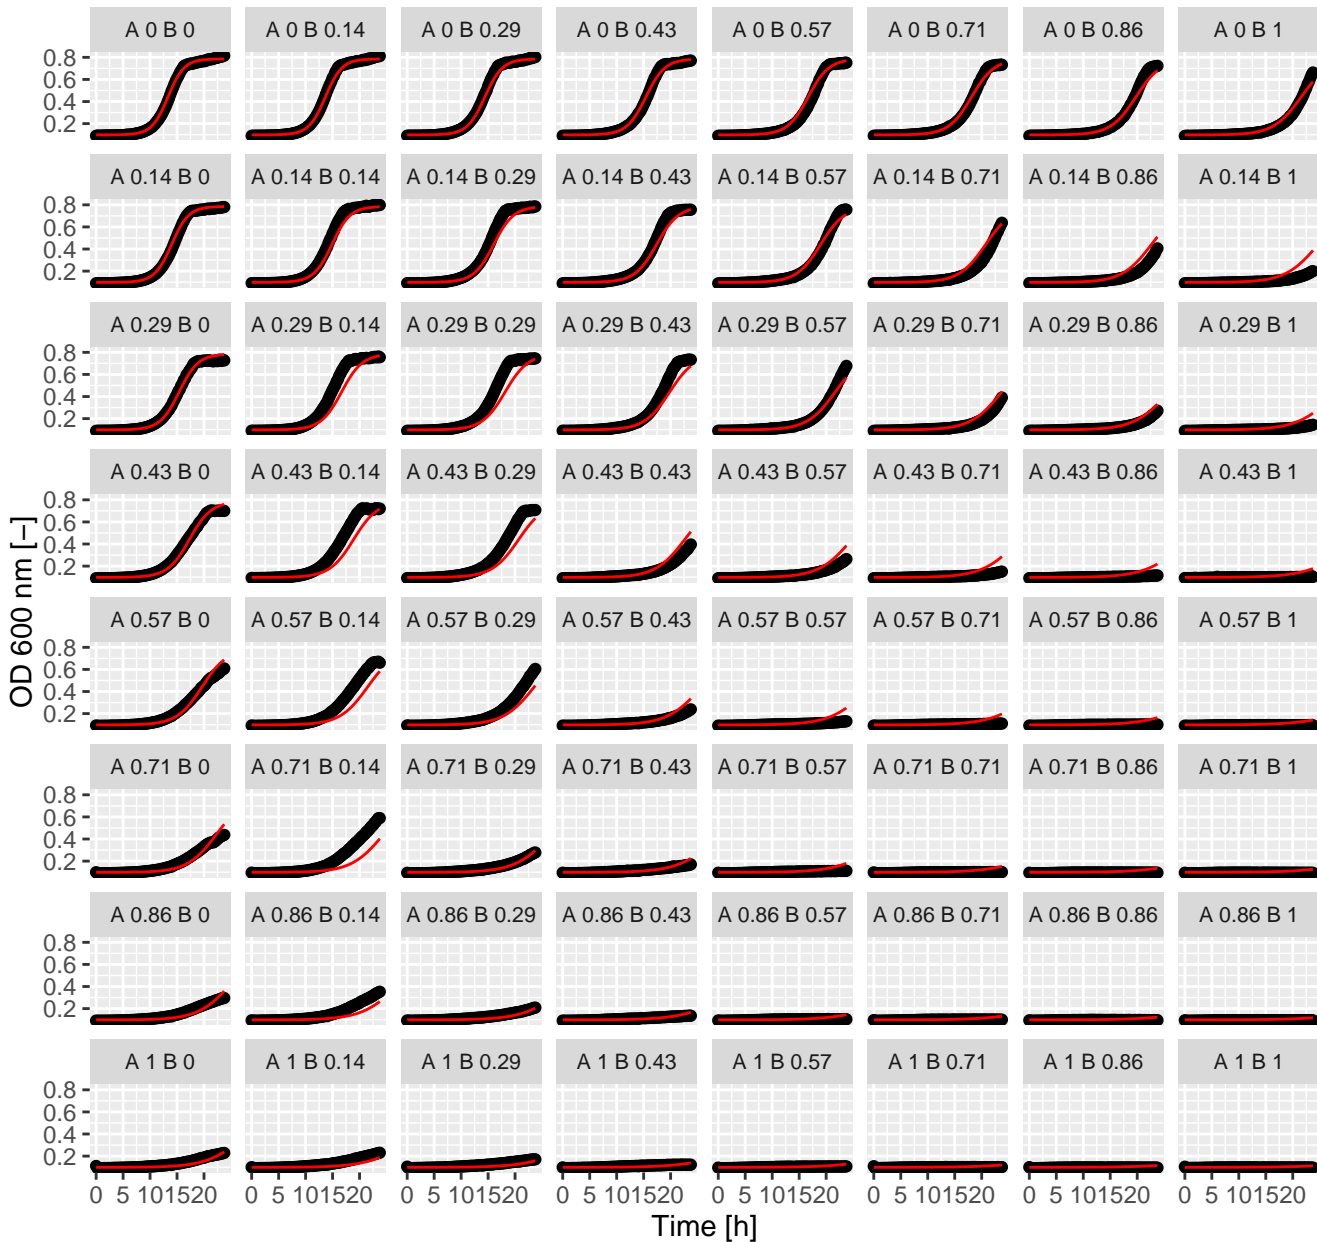

Pen.Ter (= Ax.Bx) Greco  
alpha = 2.05

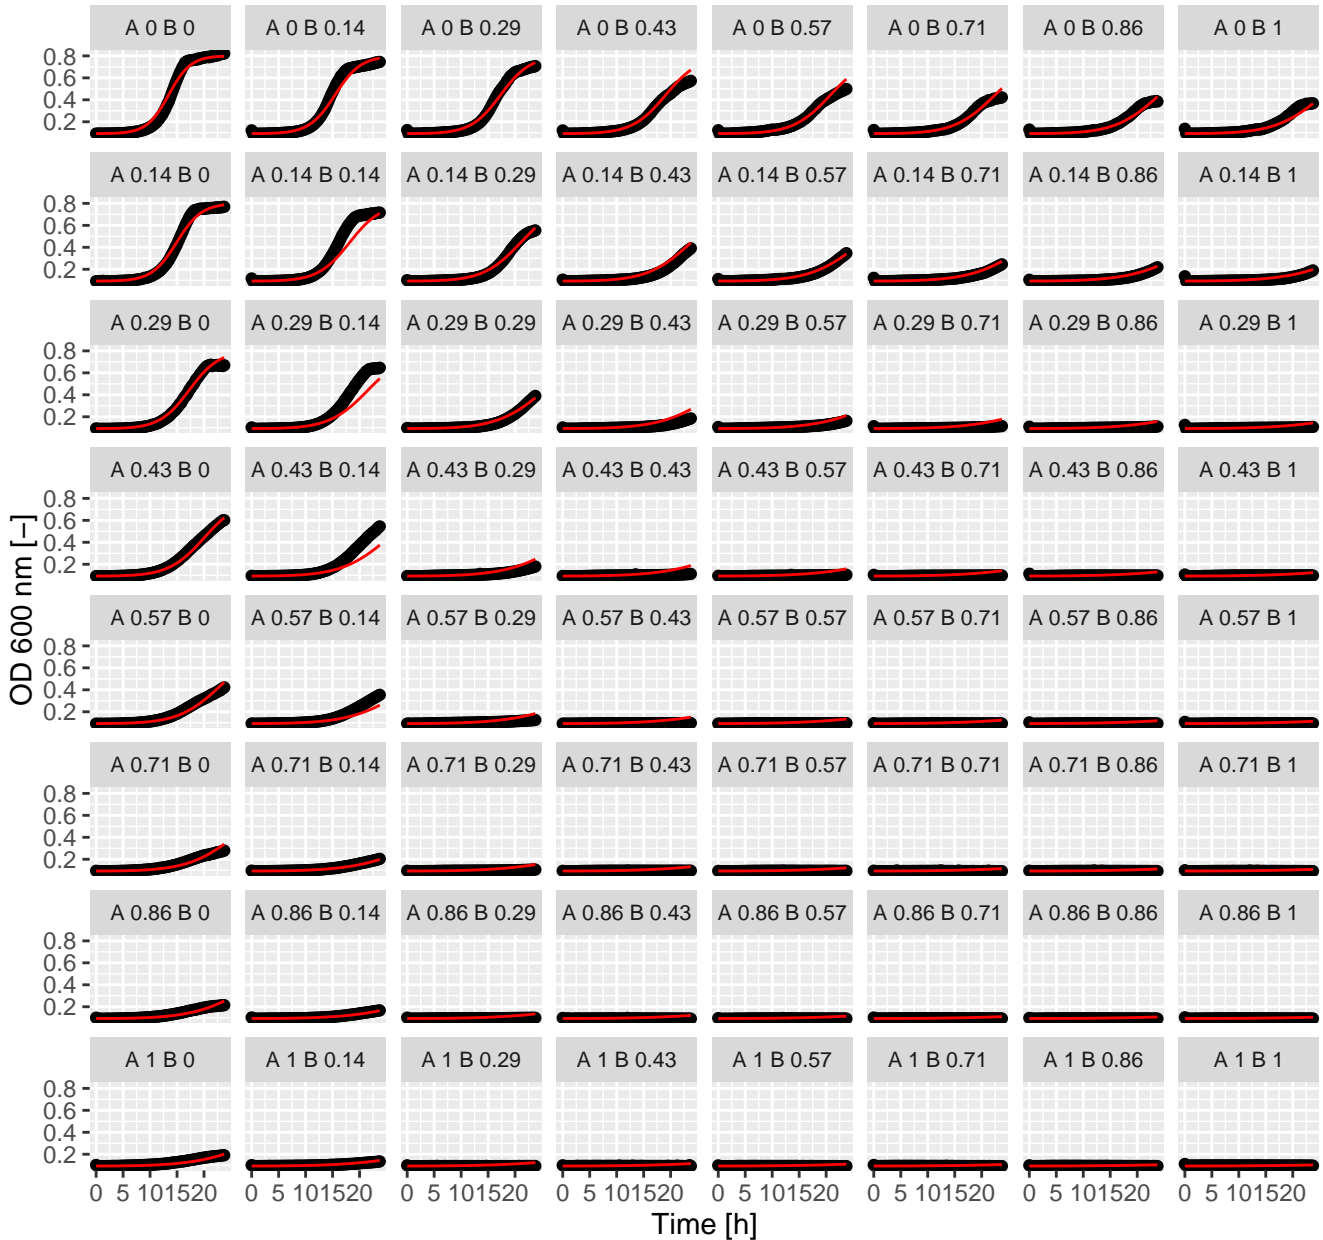



Pen.Tac (= Ax.Bx) Greco  
alpha = 2.66

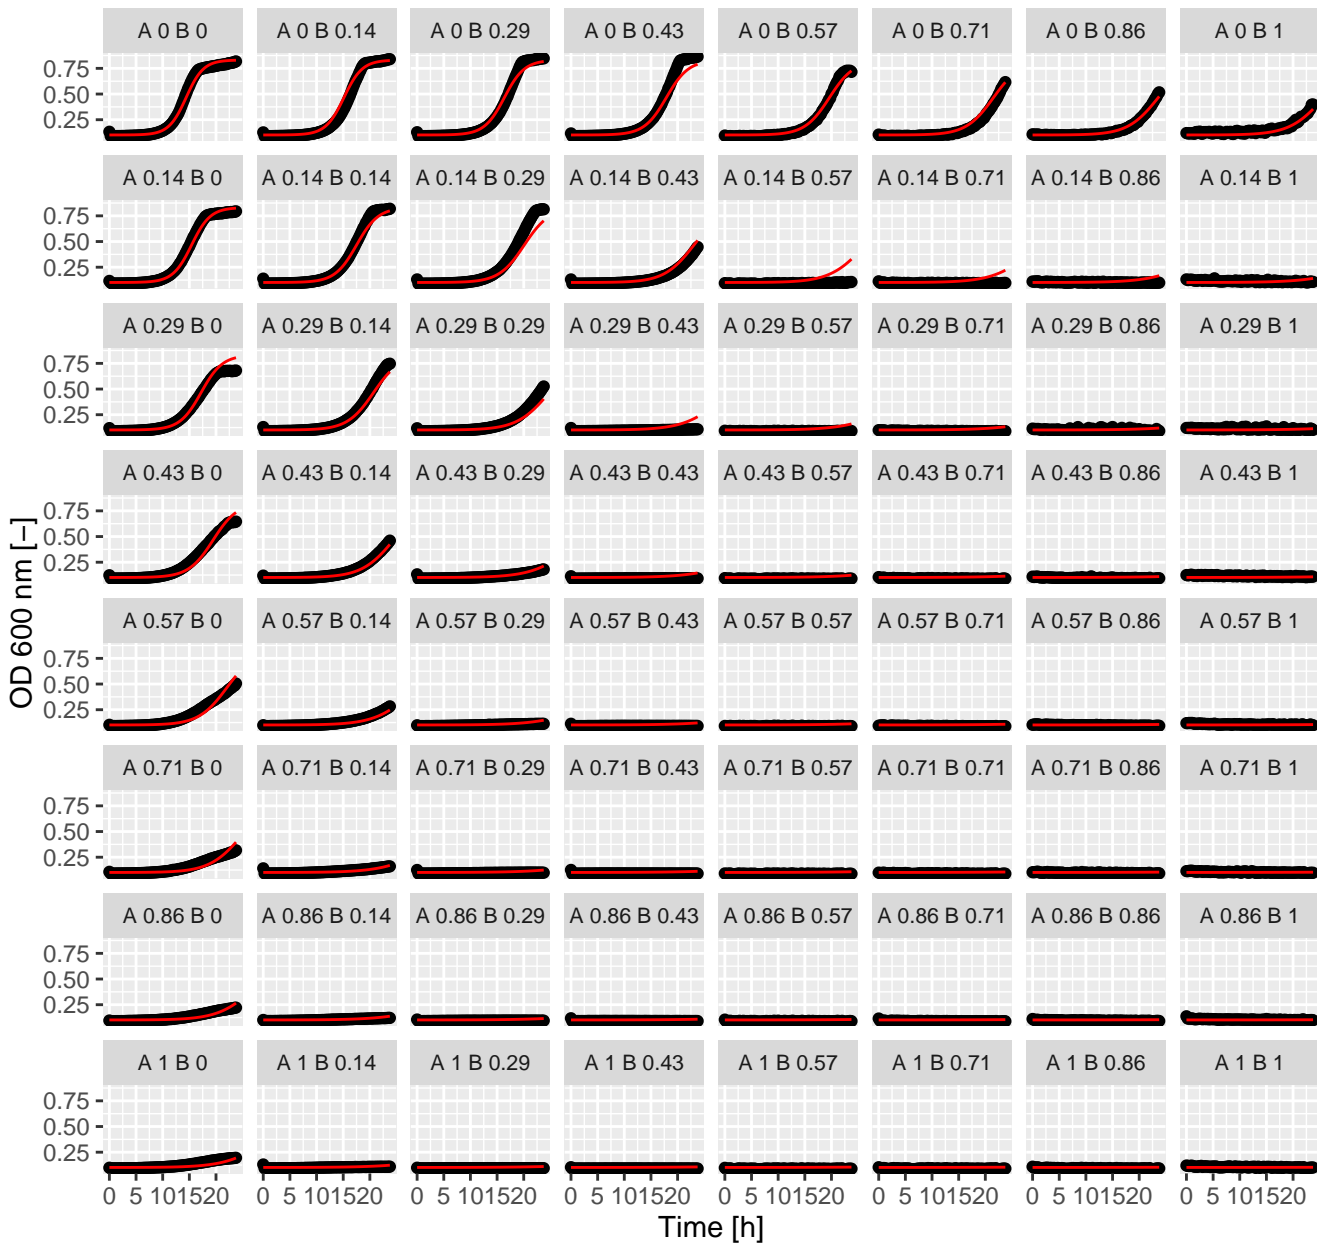

Pen.Sta (= Ax.Bx) Greco  
alpha = 0.95

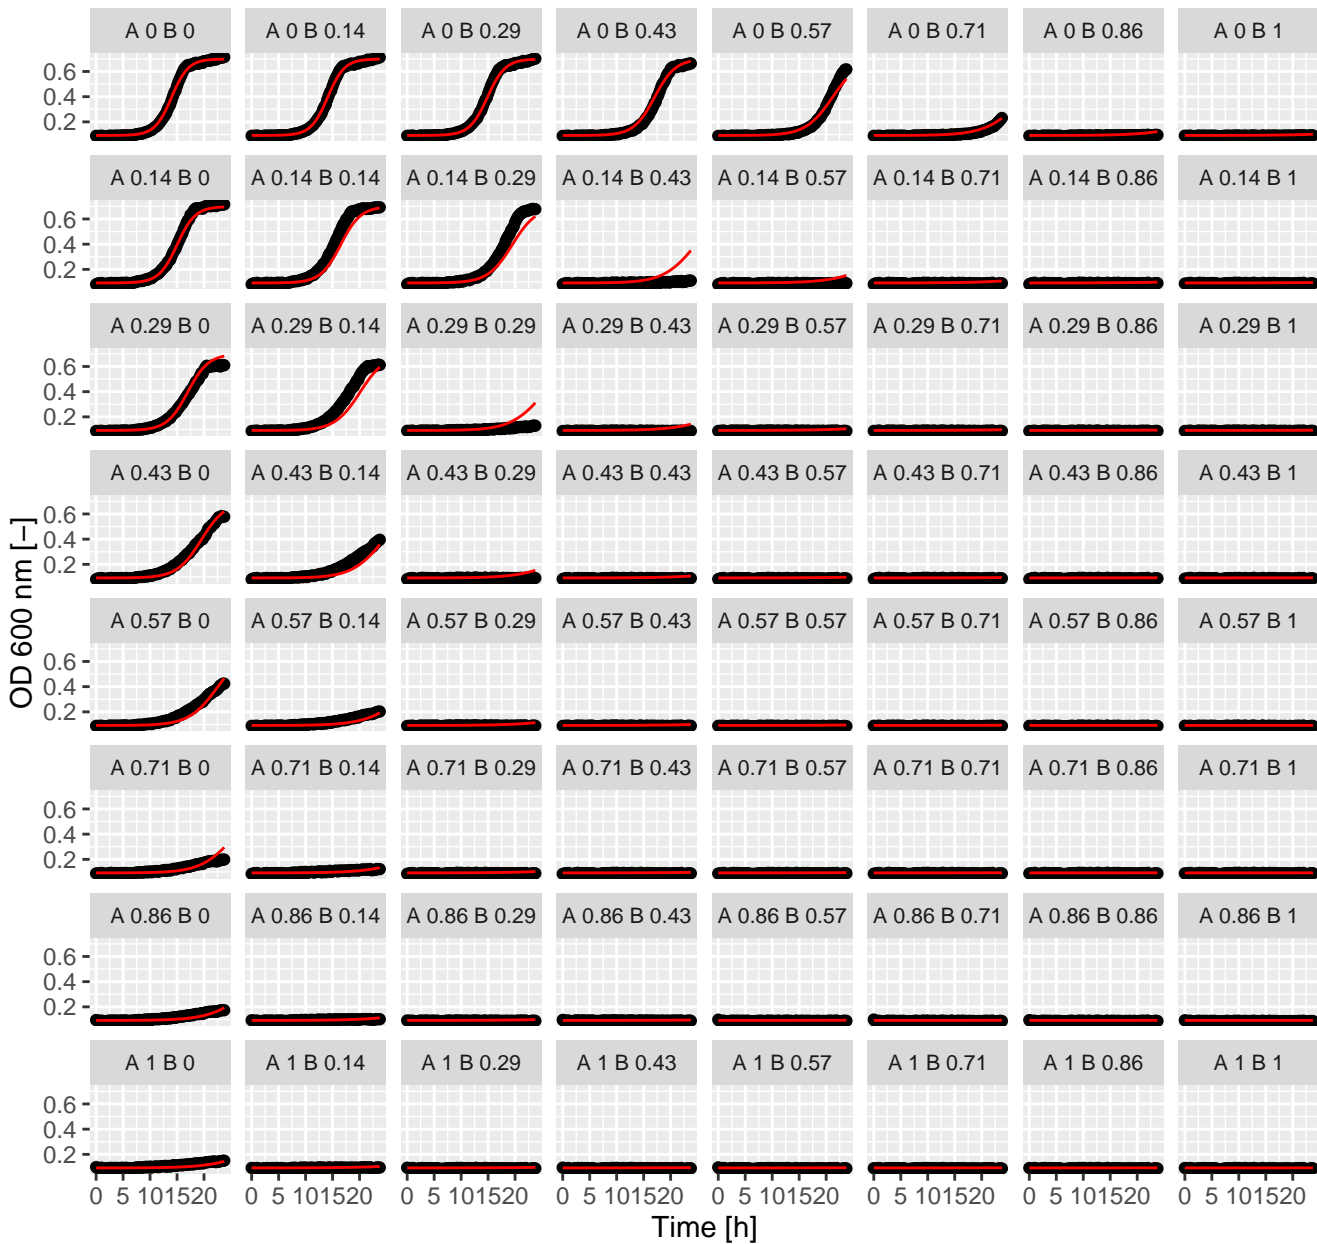

Pen.Rap (= Ax.Bx) Greco  
alpha = -0.03

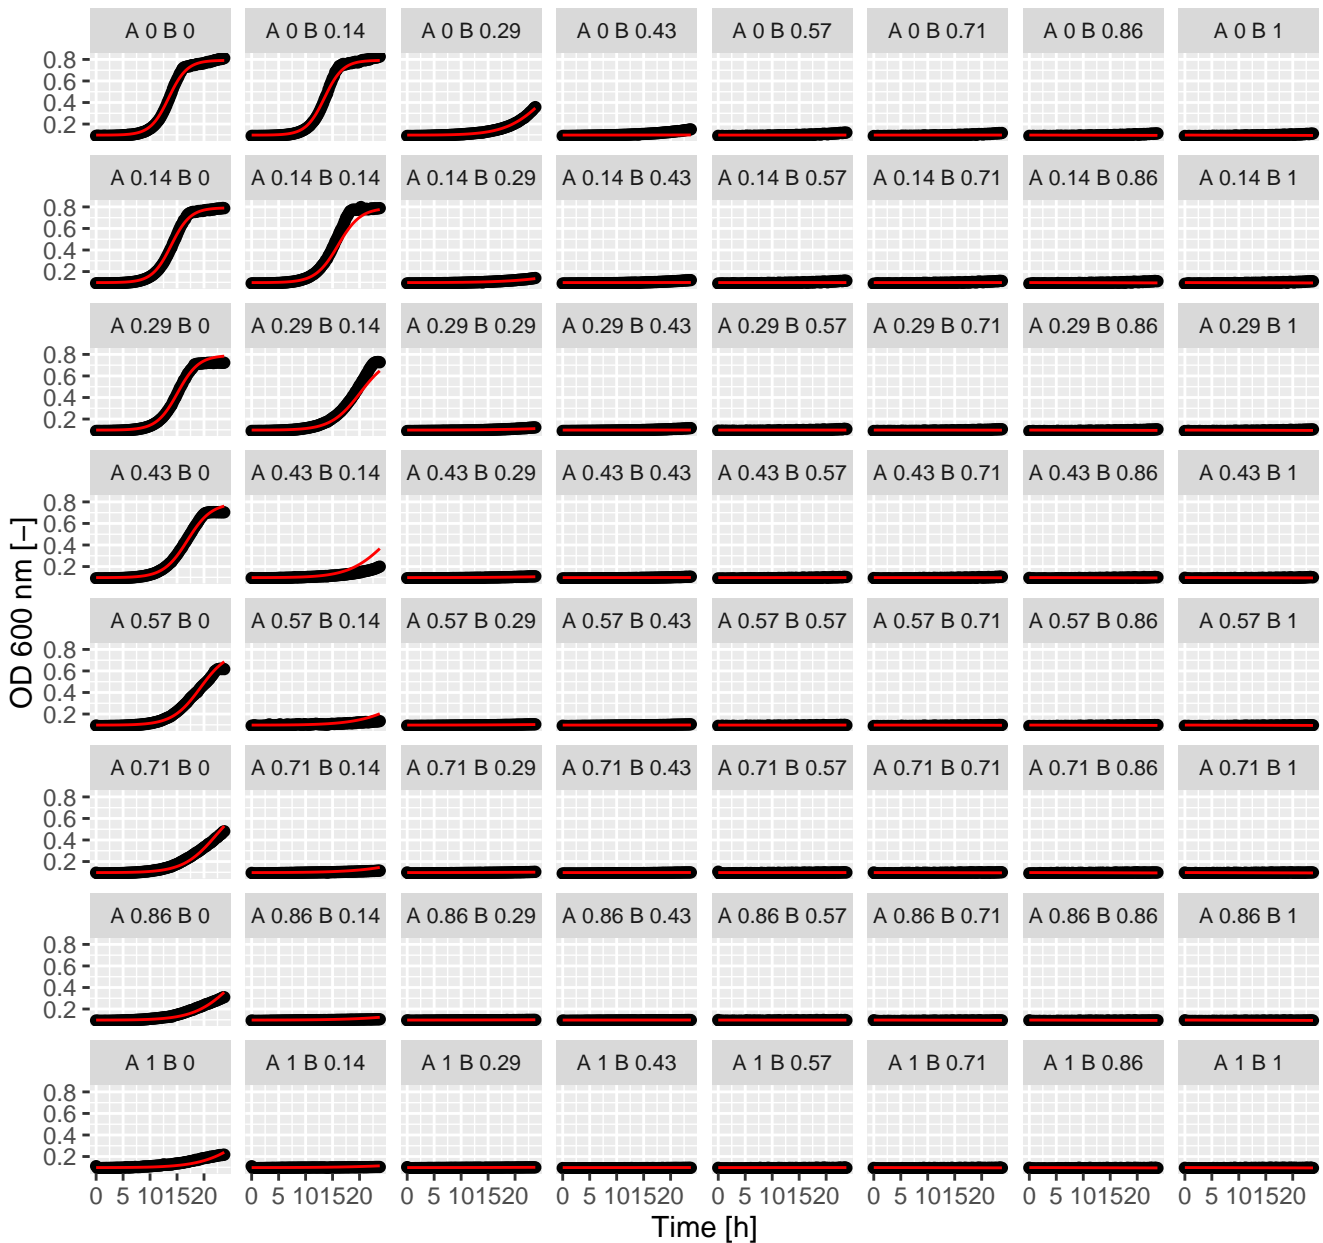

Pen.Rad (= Ax.Bx) Greco  
alpha = 2.79

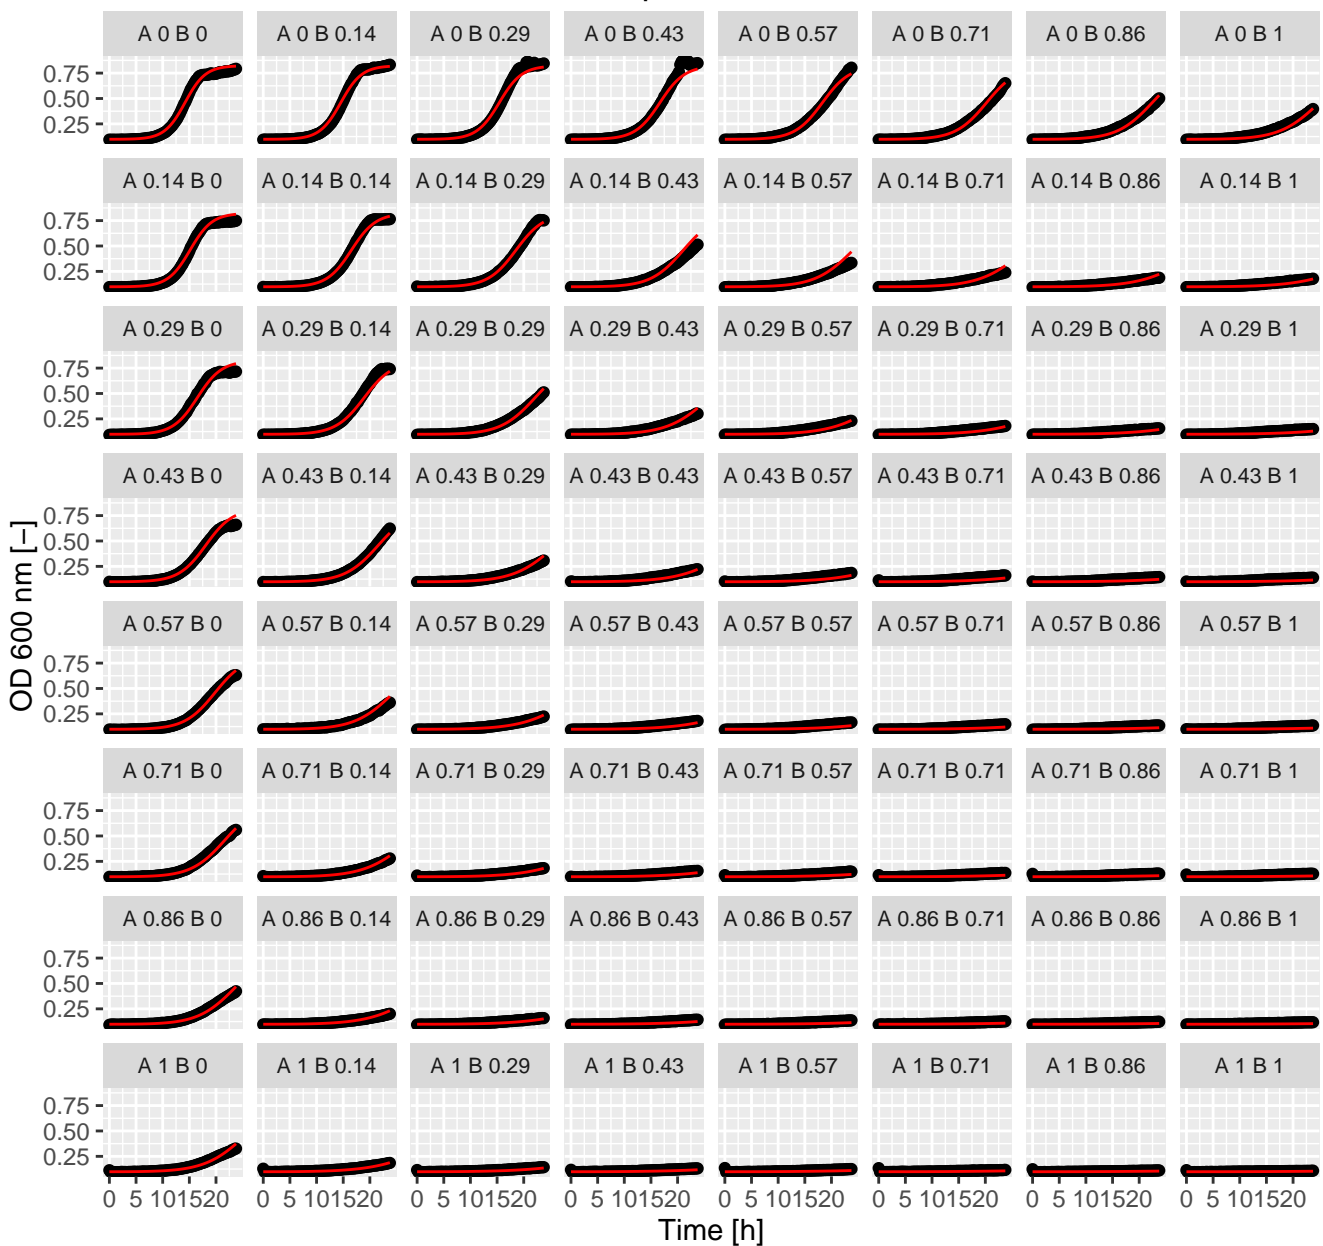

Pen.Qmy (= Ax.Bx) Greco  
alpha = 1.87

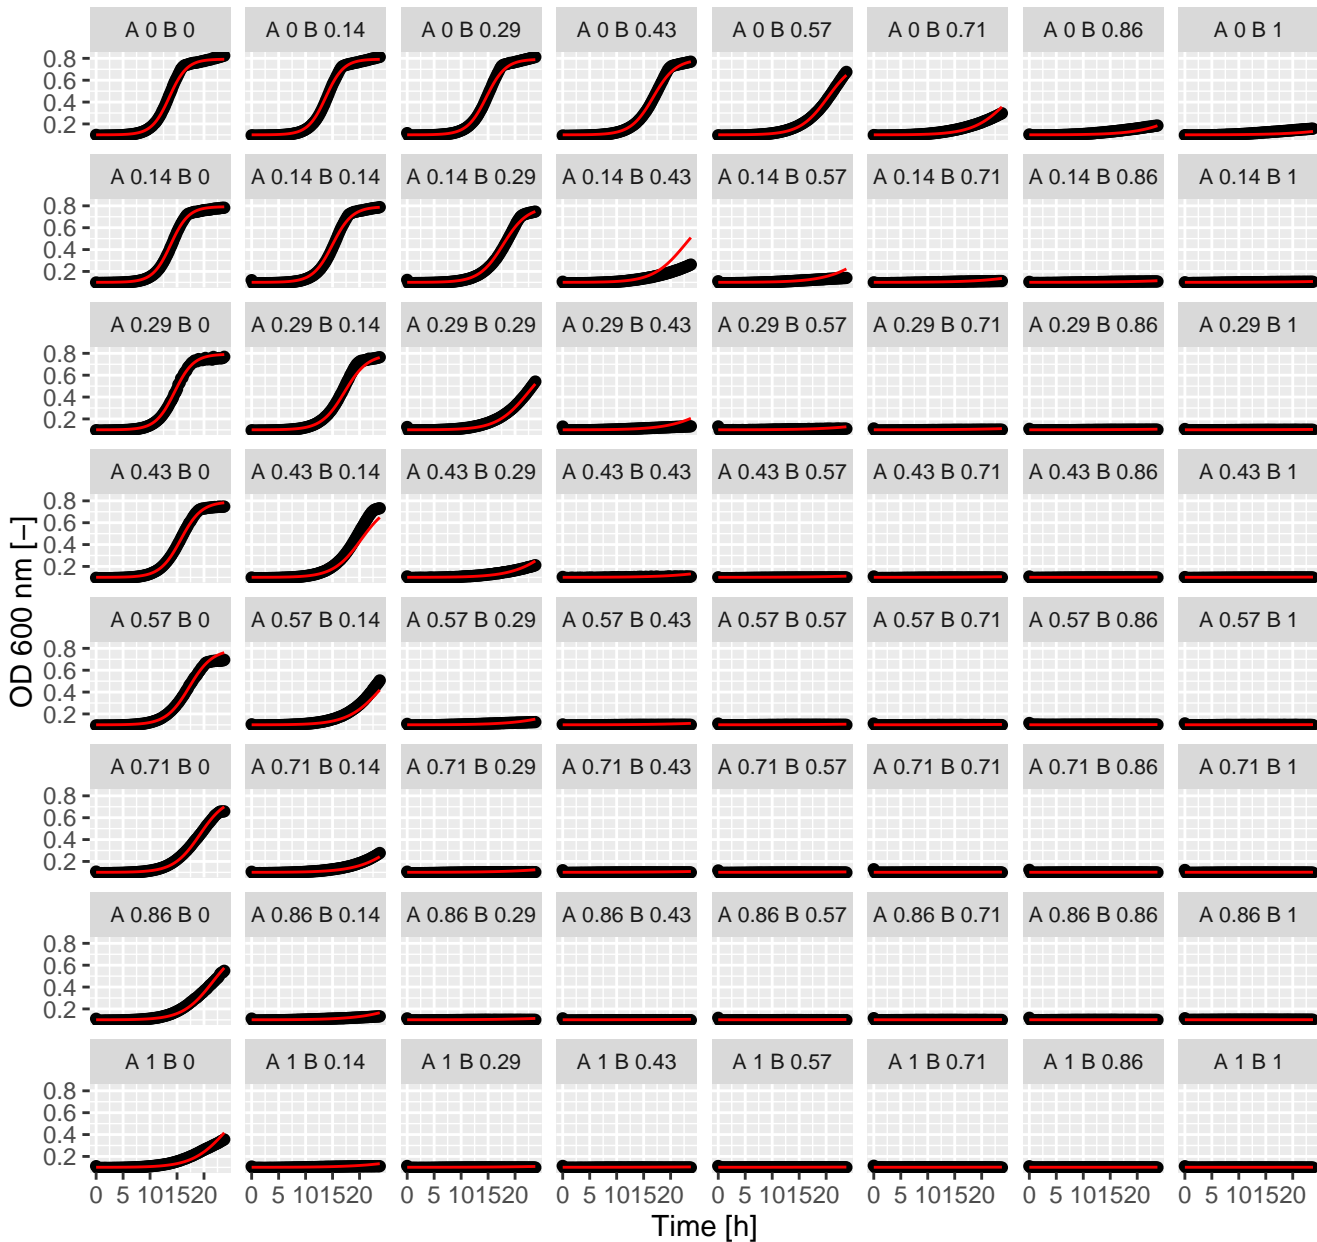

Myr.Ter (= Ax.Bx) Greco  
 $\alpha = -1.37$

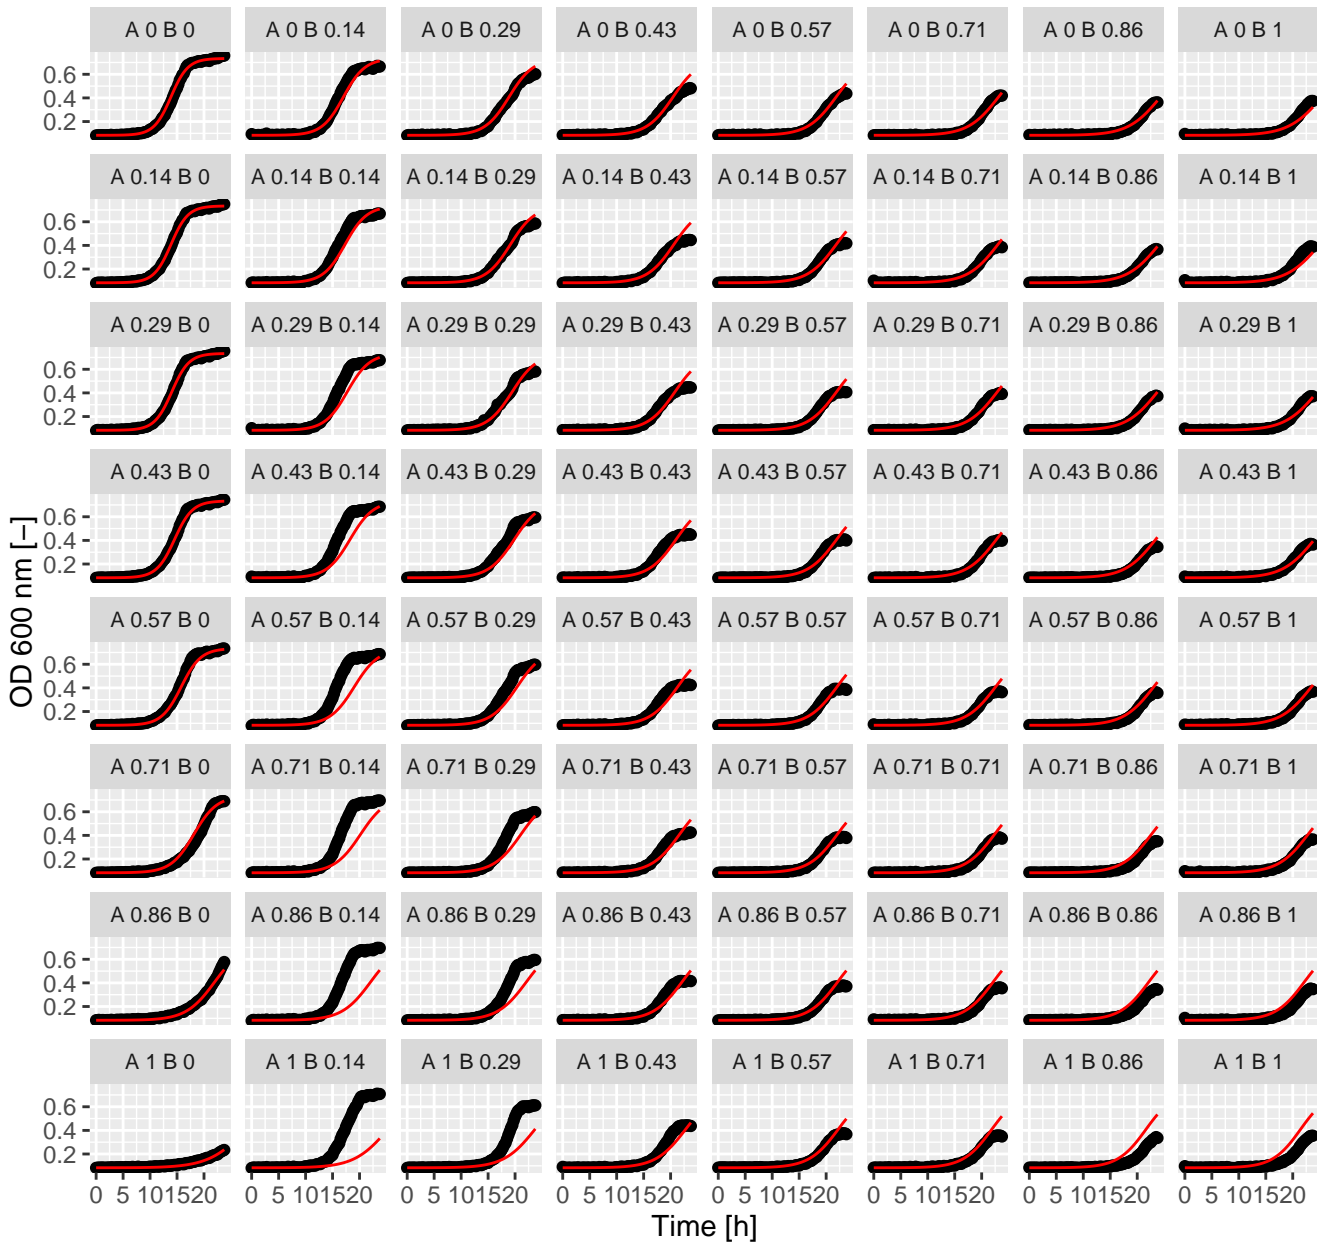

Myr.Tac (= Ax.Bx) Greco  
 $\alpha = -0.01$

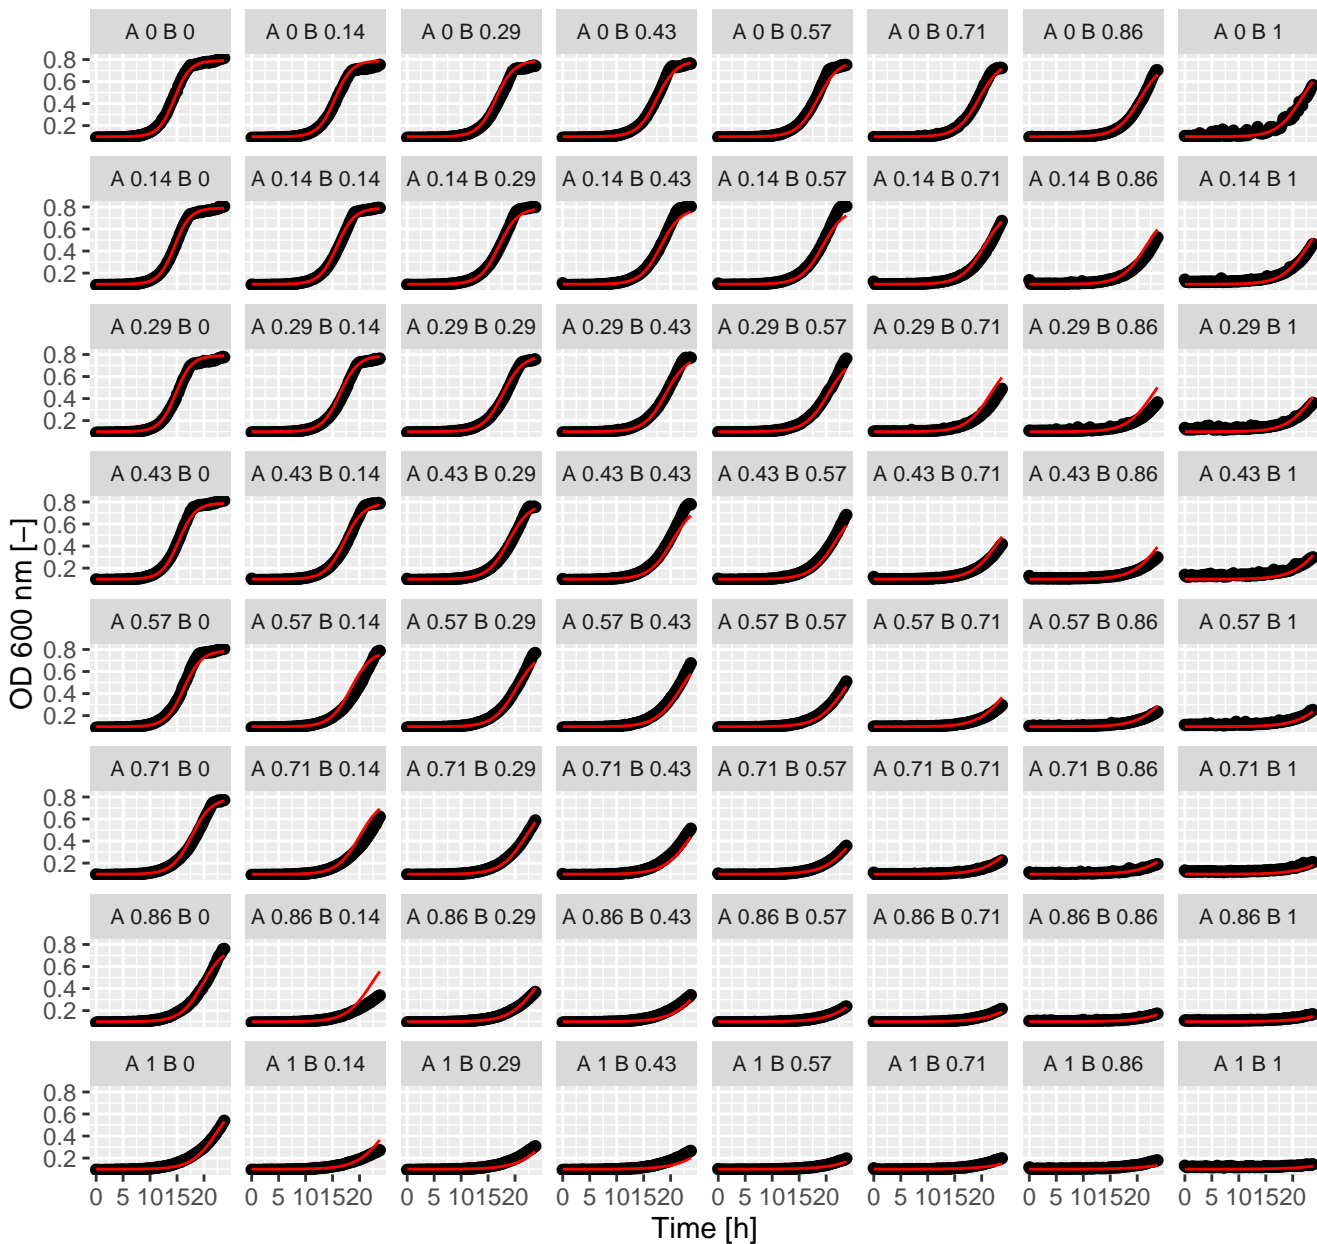

Myr.Sta (= Ax.Bx) Greco  
 $\alpha = -1.23$

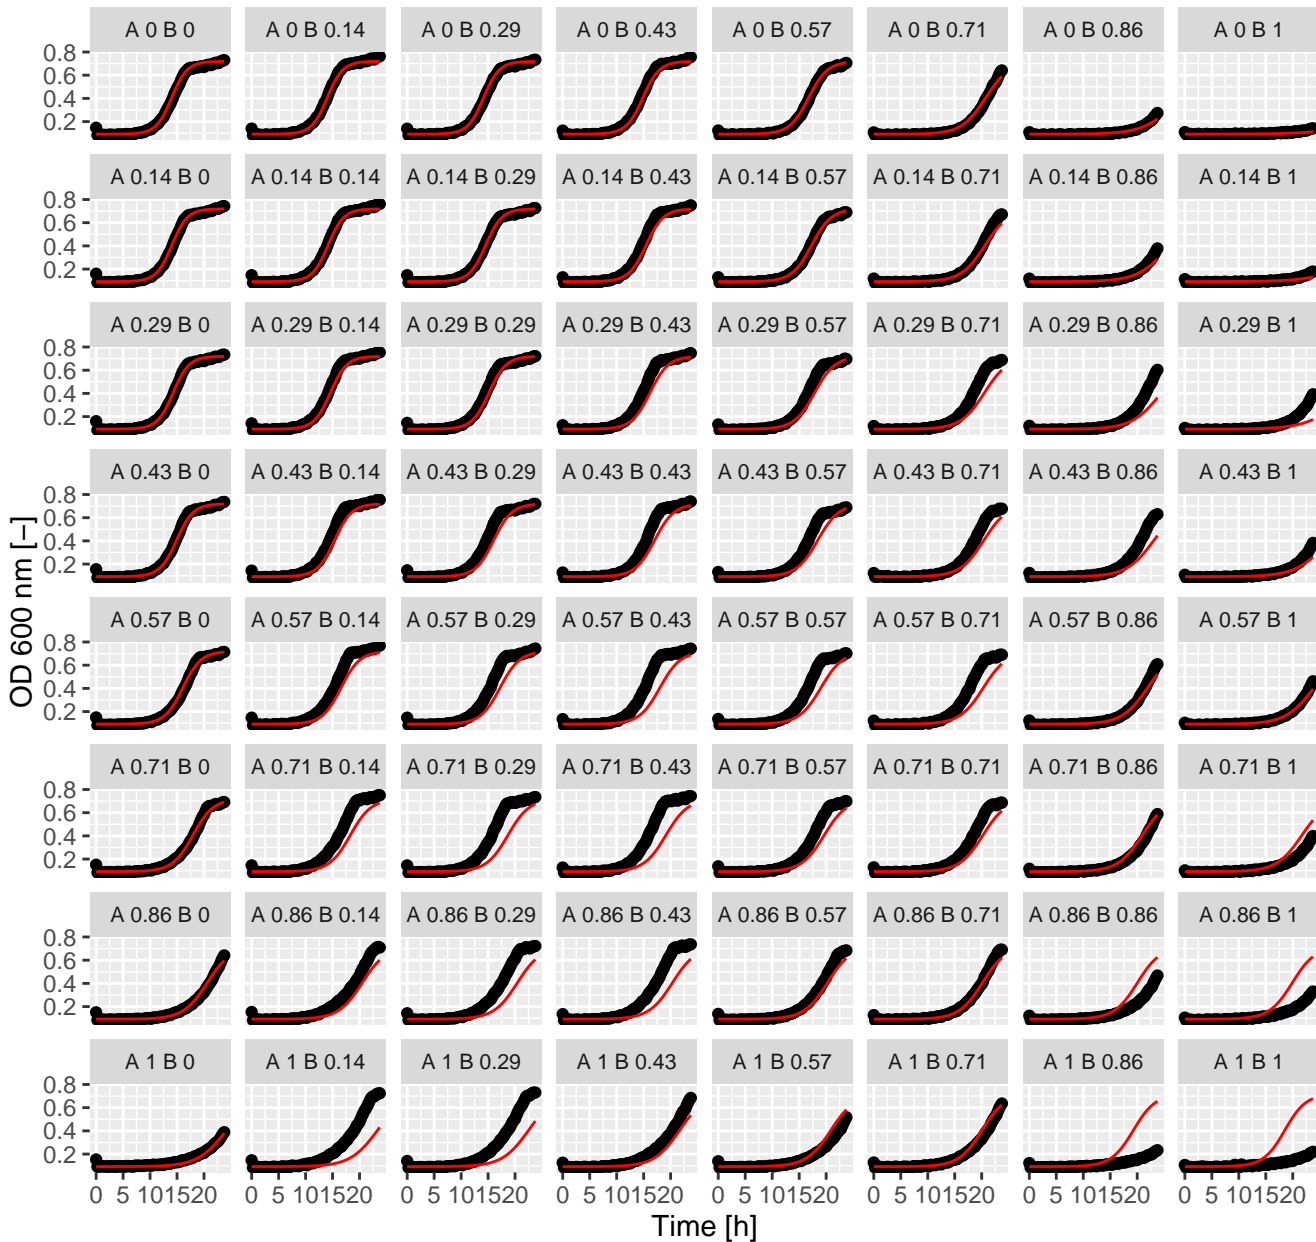



Myr.Rad (= Ax.Bx) Greco  
alpha = 0.94

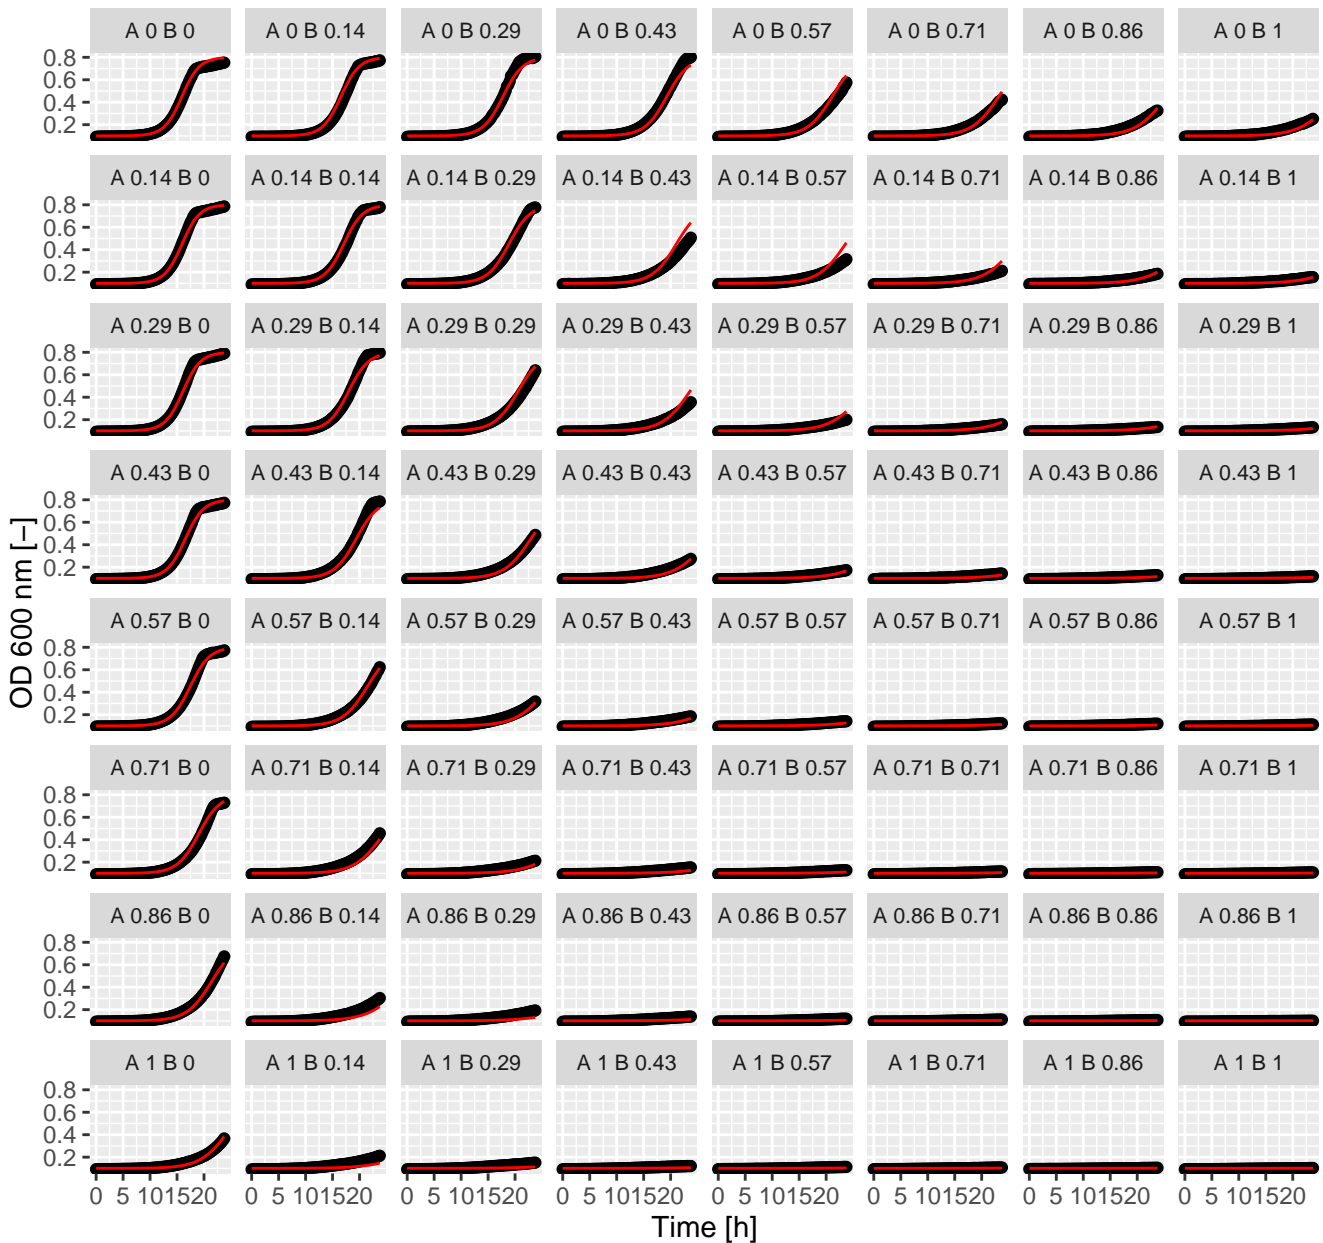

Myr.Qnn (= Ax.Bx) Greco  
alpha = -1.19

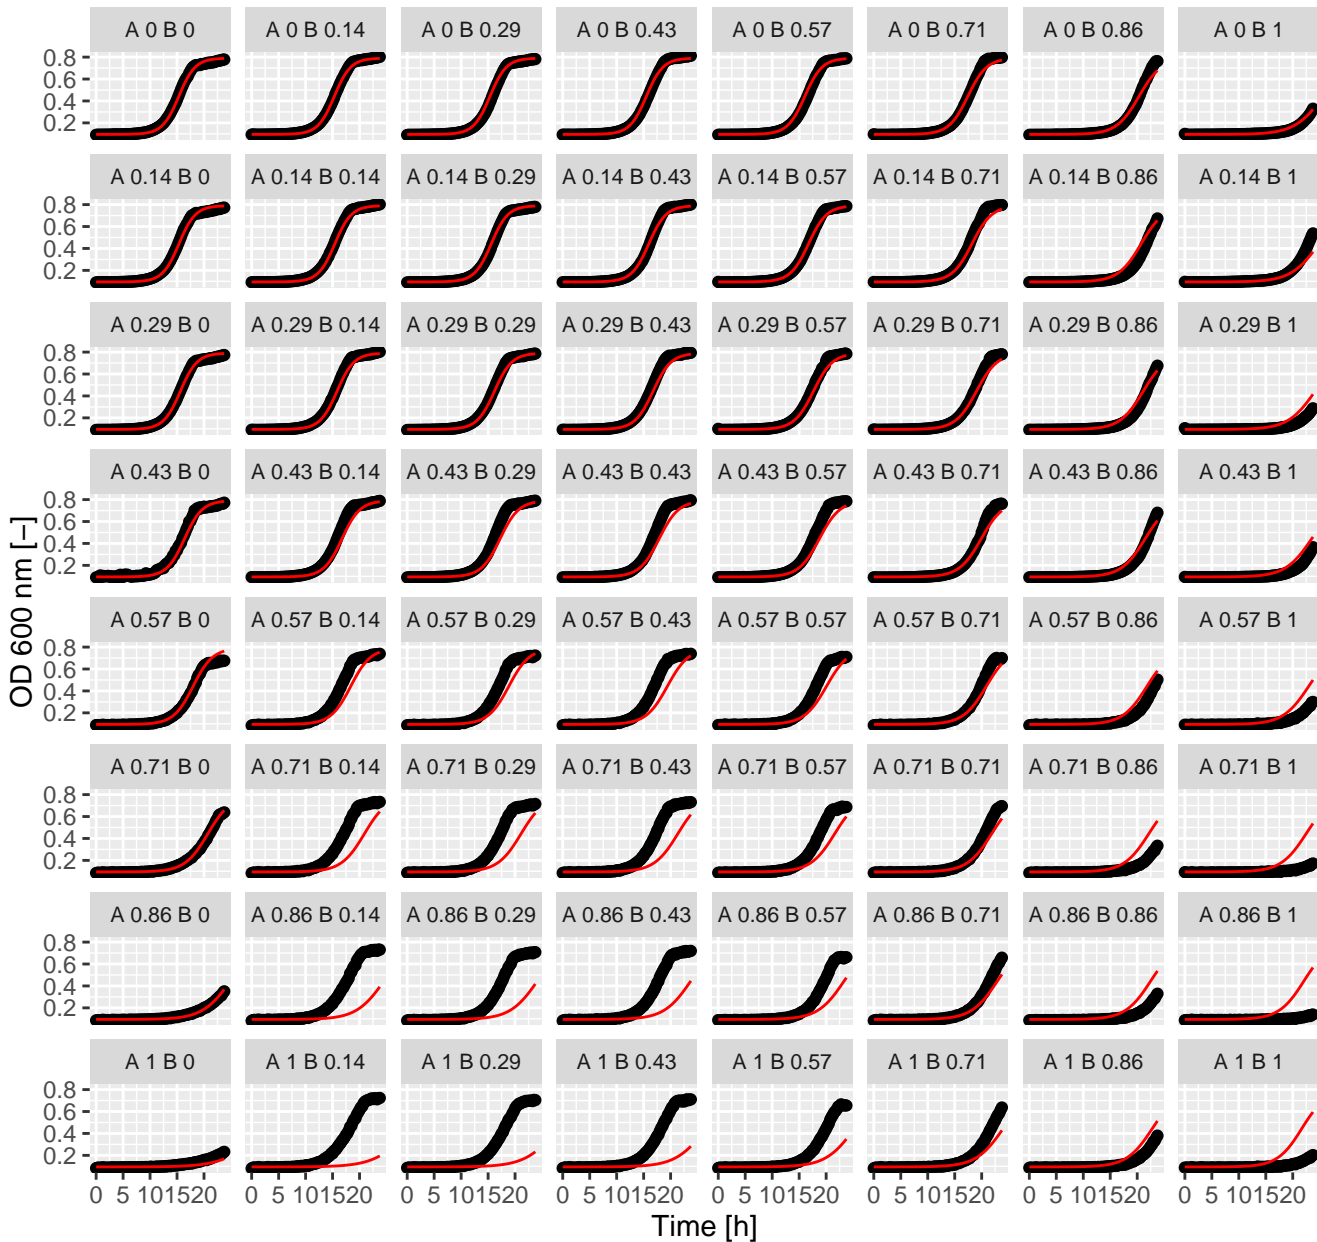

Myr.Pen (= Ax.Bx) Greco  
 $\alpha = -0.34$

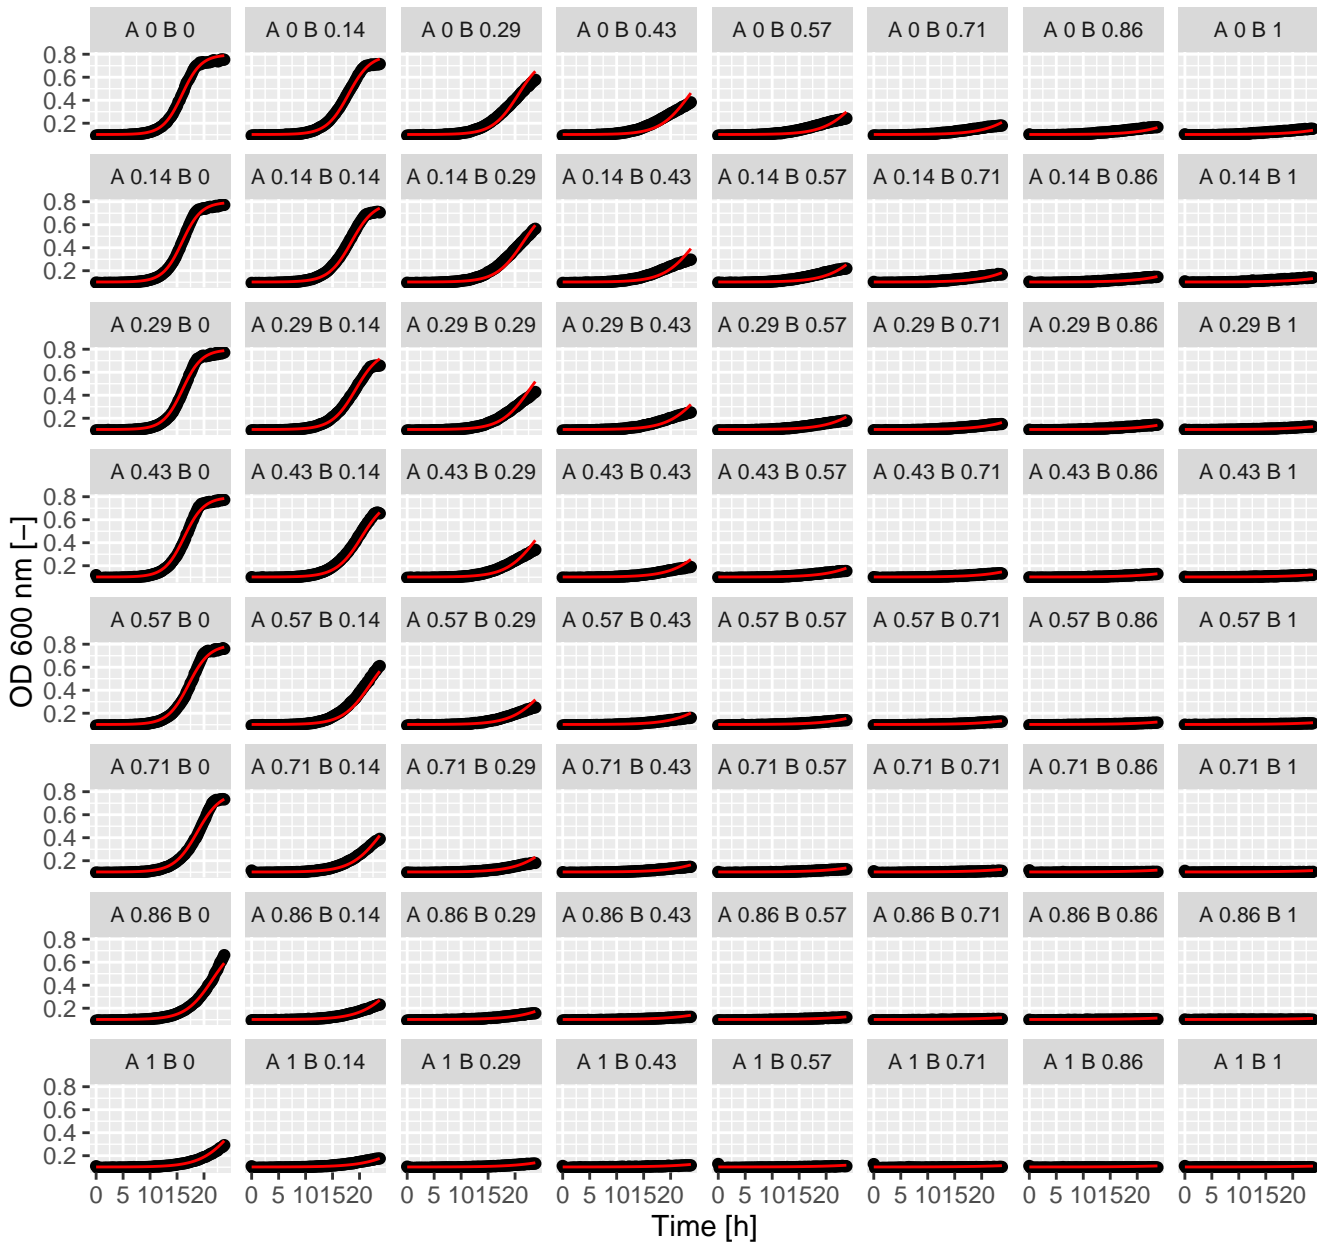

Myr.Myr (= Ax.Bx) Greco  
alpha = 0.6

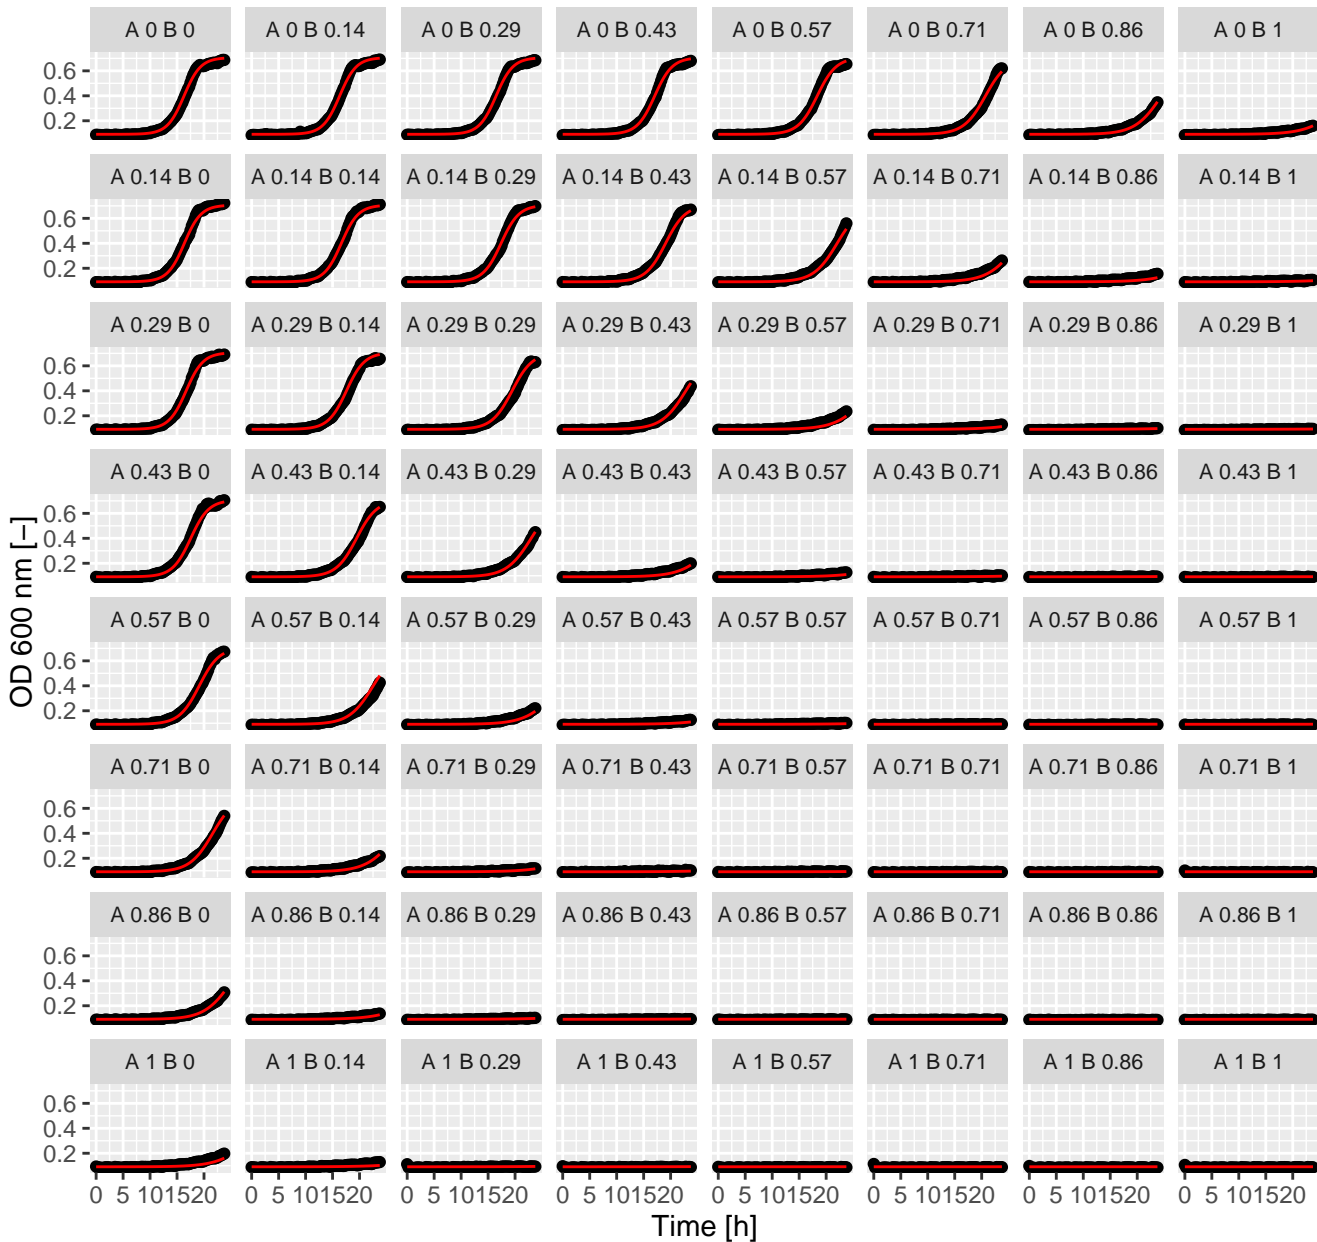

MMS.Ter (= Ax.Bx) Greco  
alpha = -0.49

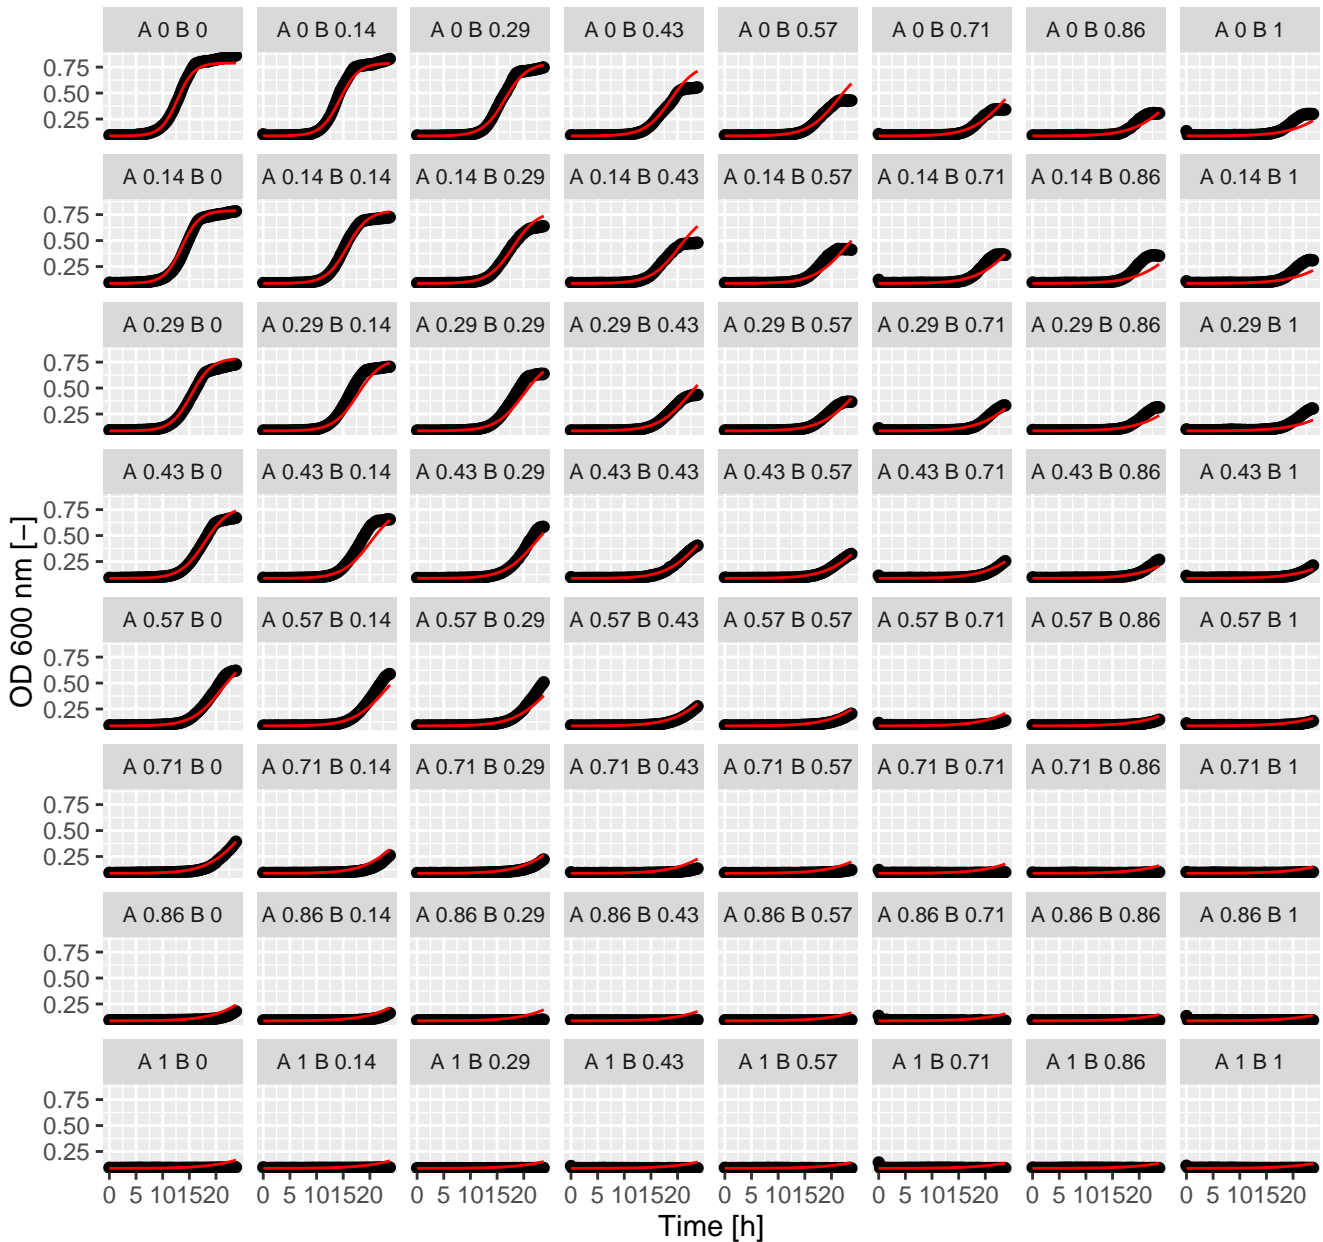

MMS.Tac (= Ax.Bx) Greco  
 $\alpha = -0.63$

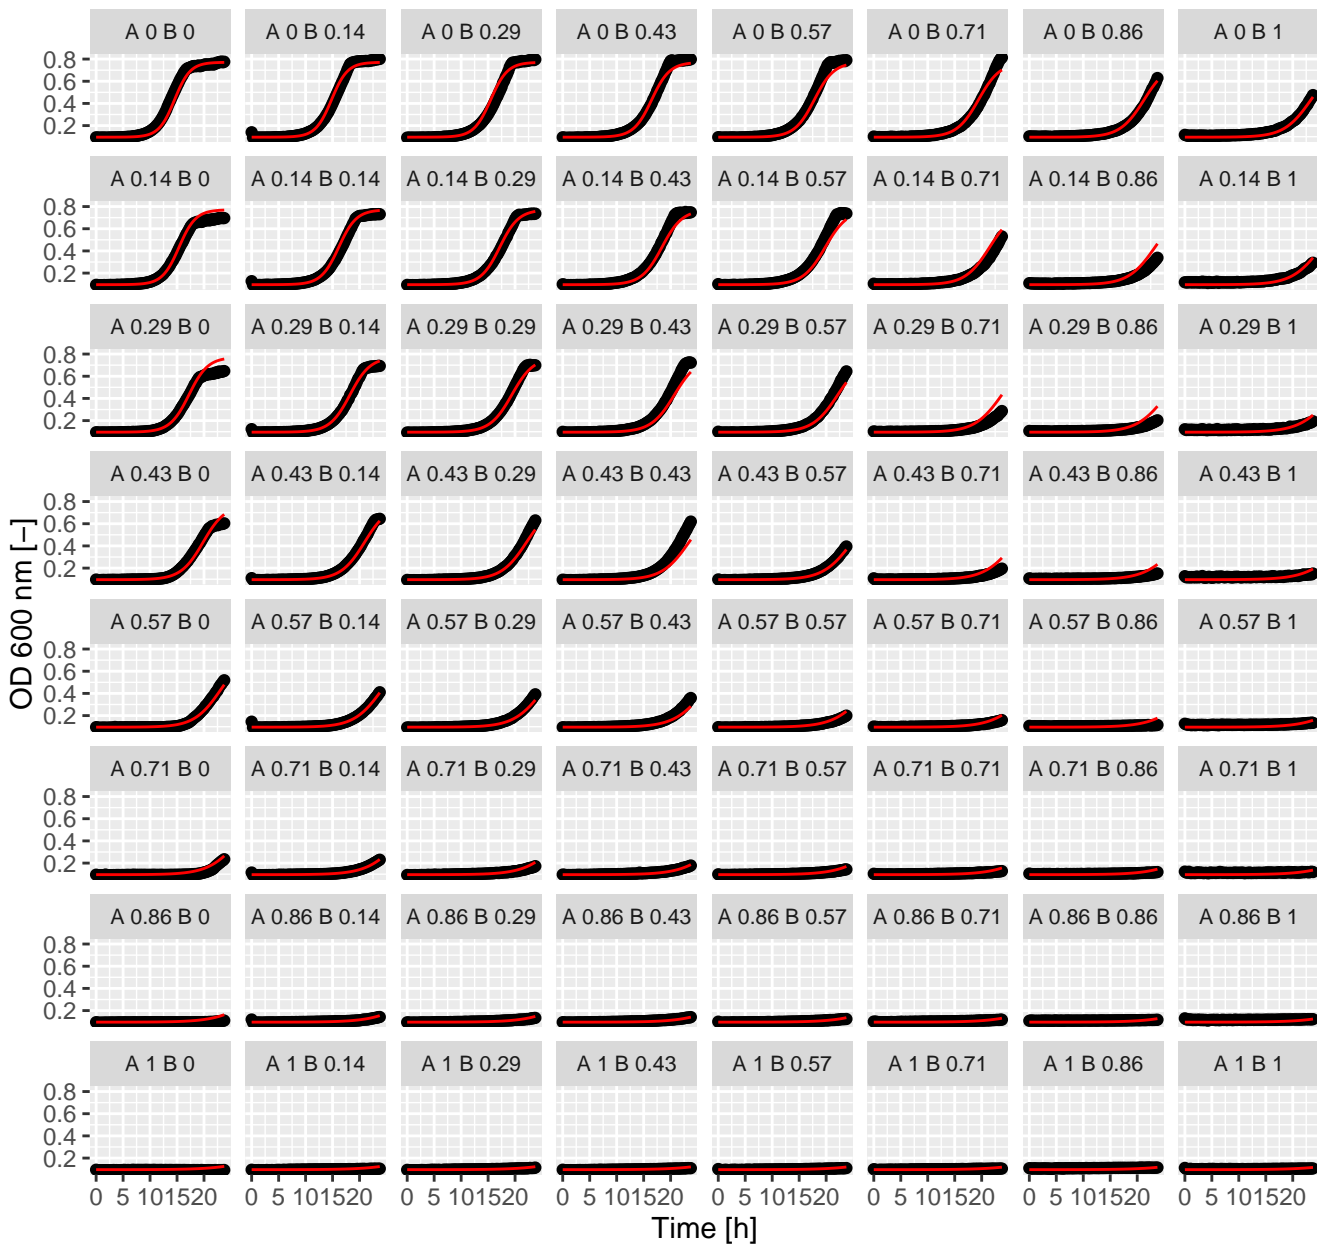

# MMS.Sta (= Ax.Bx) Greco

alpha = -0.76

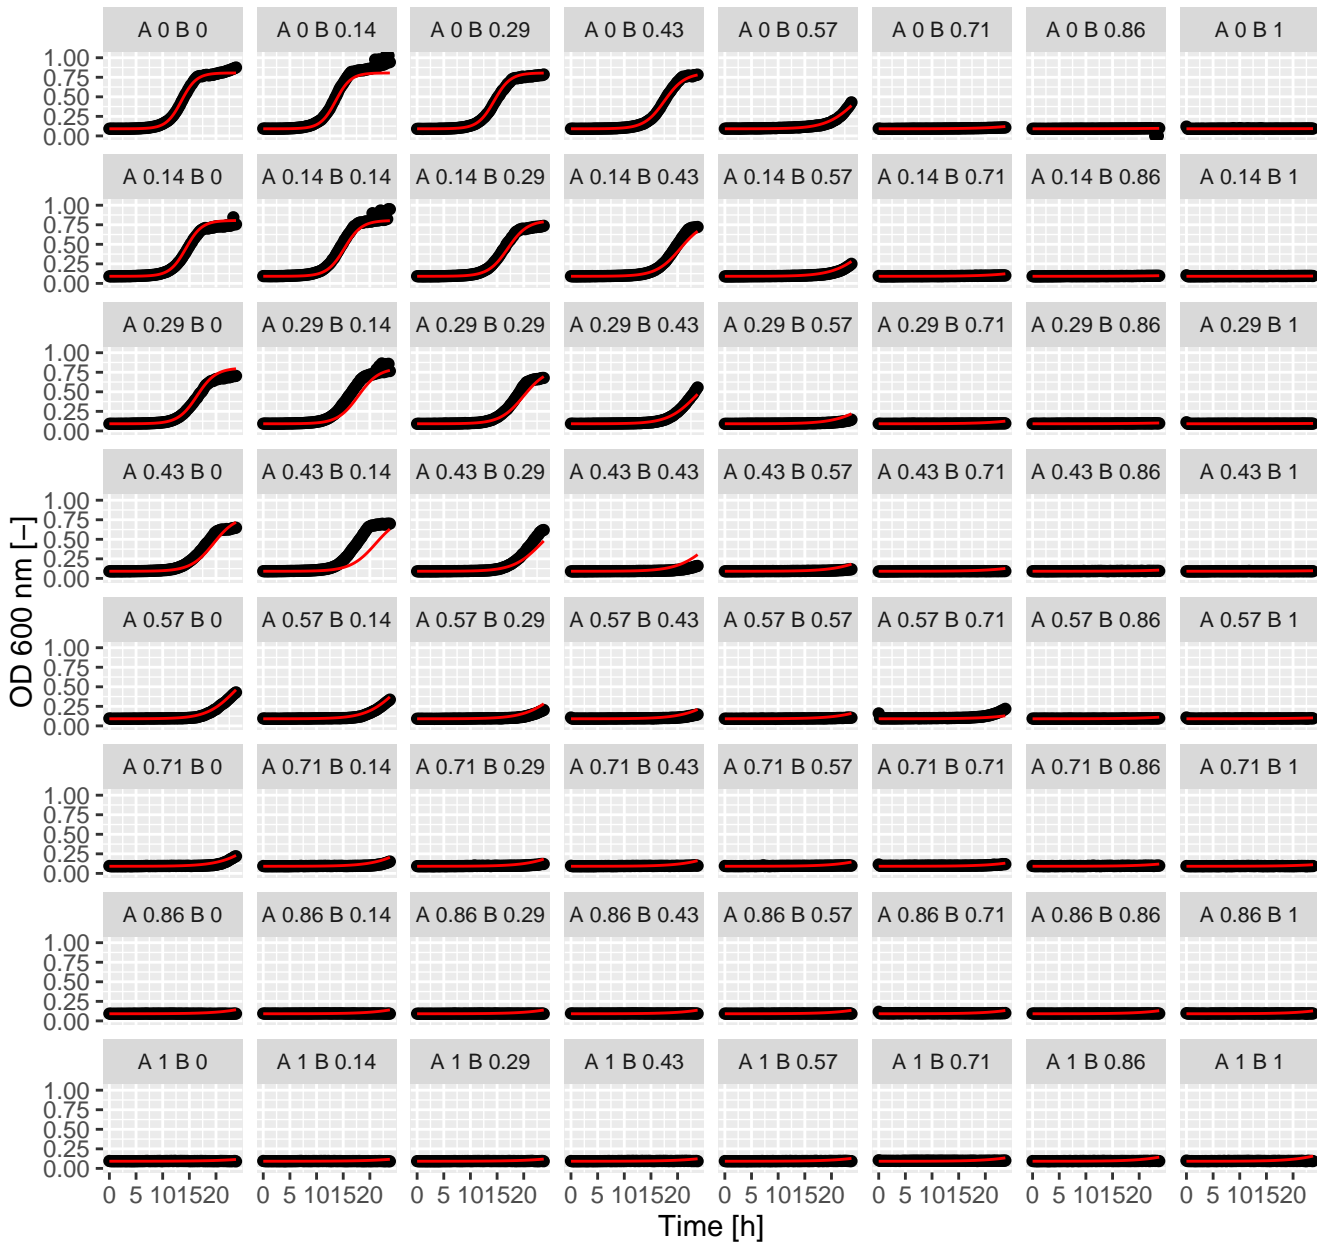

MMS.Pen (= Ax.Bx) Greco  
alpha = -0.17

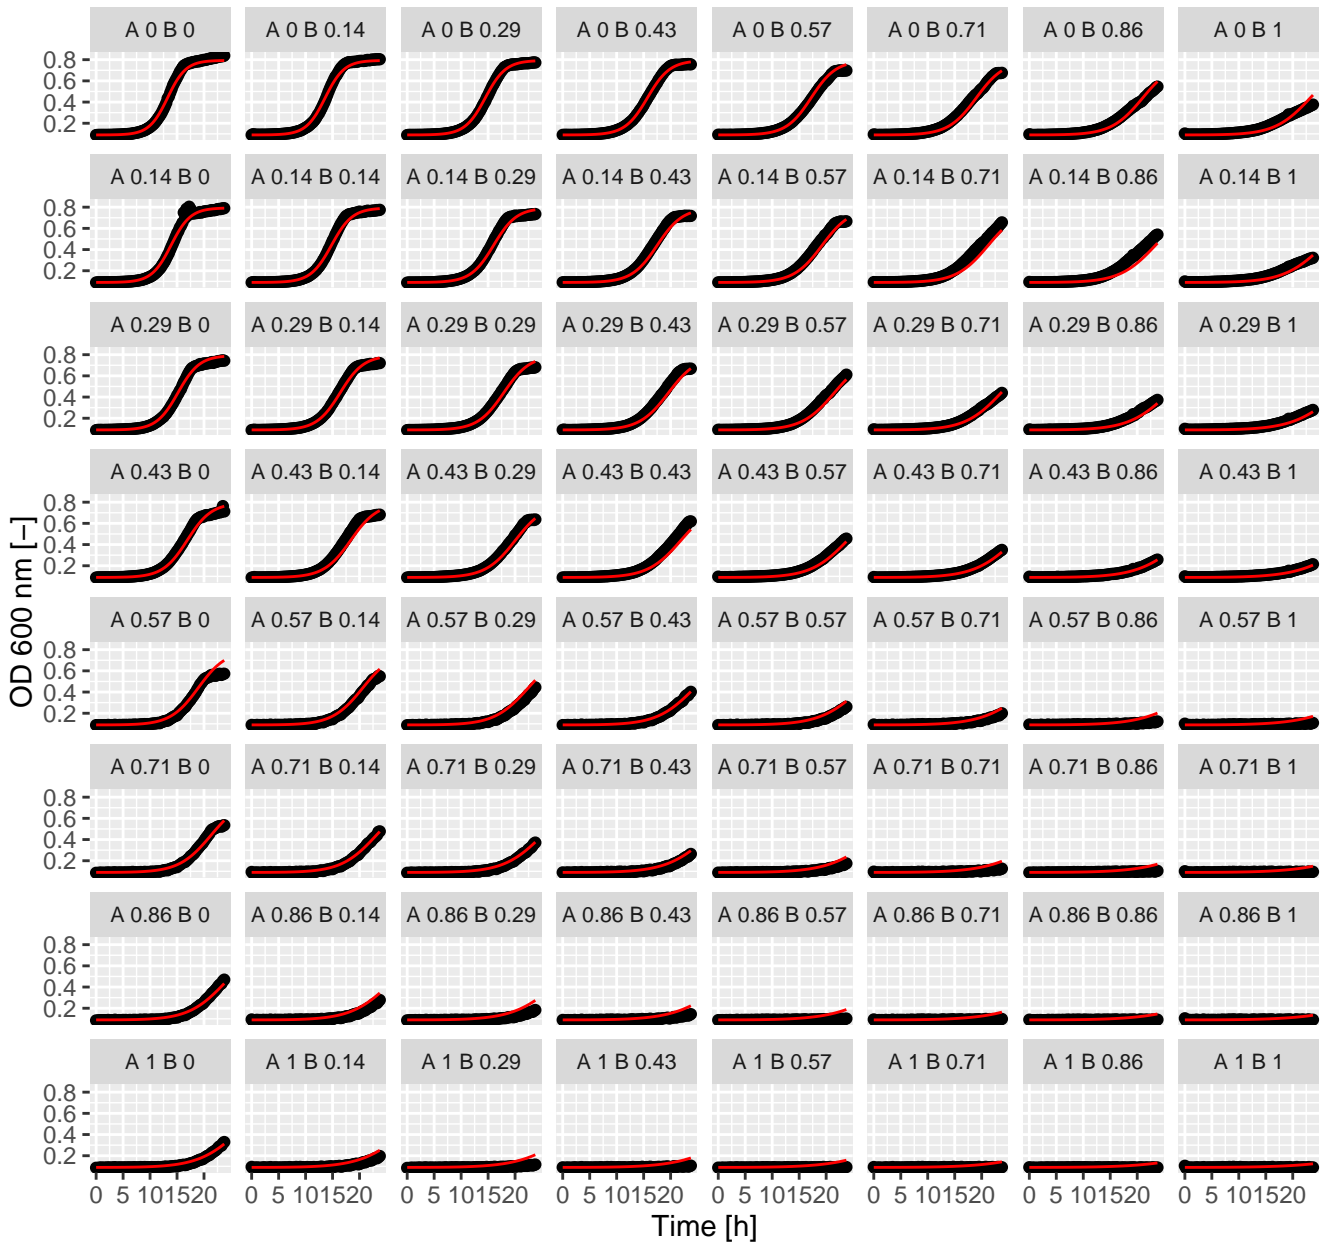



MMS.MMS (= Ax.Bx) Greco  
alpha = 0.49

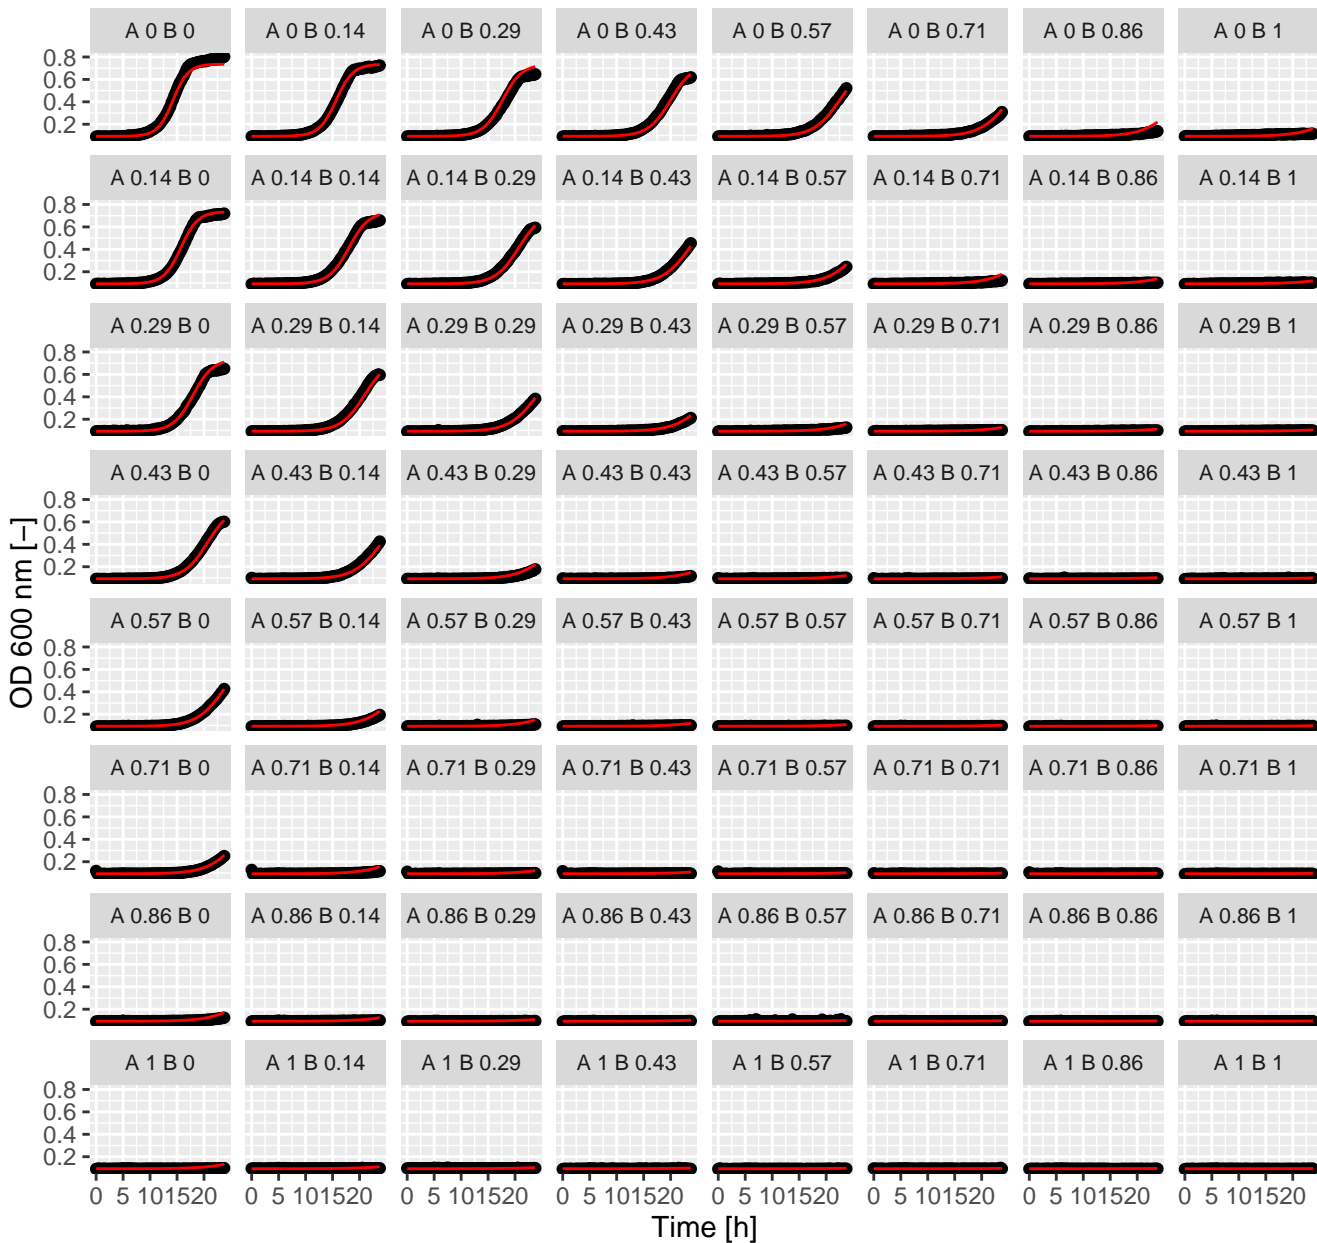

Met.Ter (= Ax.Bx) Greco  
 $\alpha = -0.68$

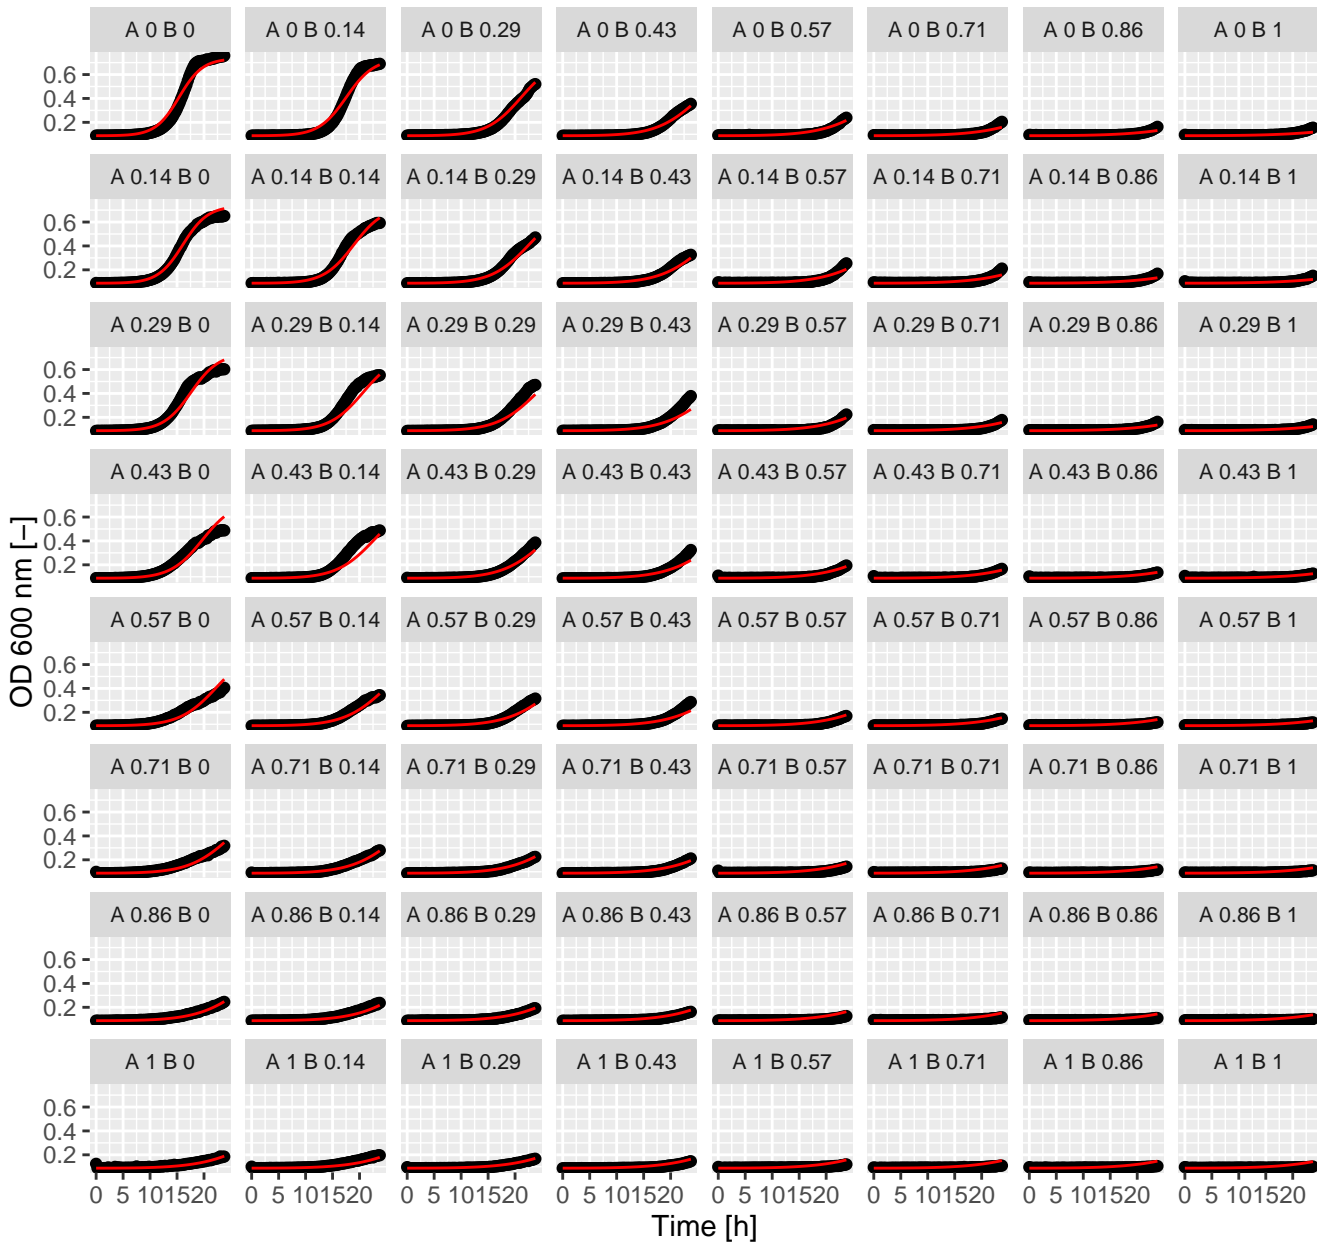

Met.Tac (= Ax.Bx) Greco  
 $\alpha = -1.06$

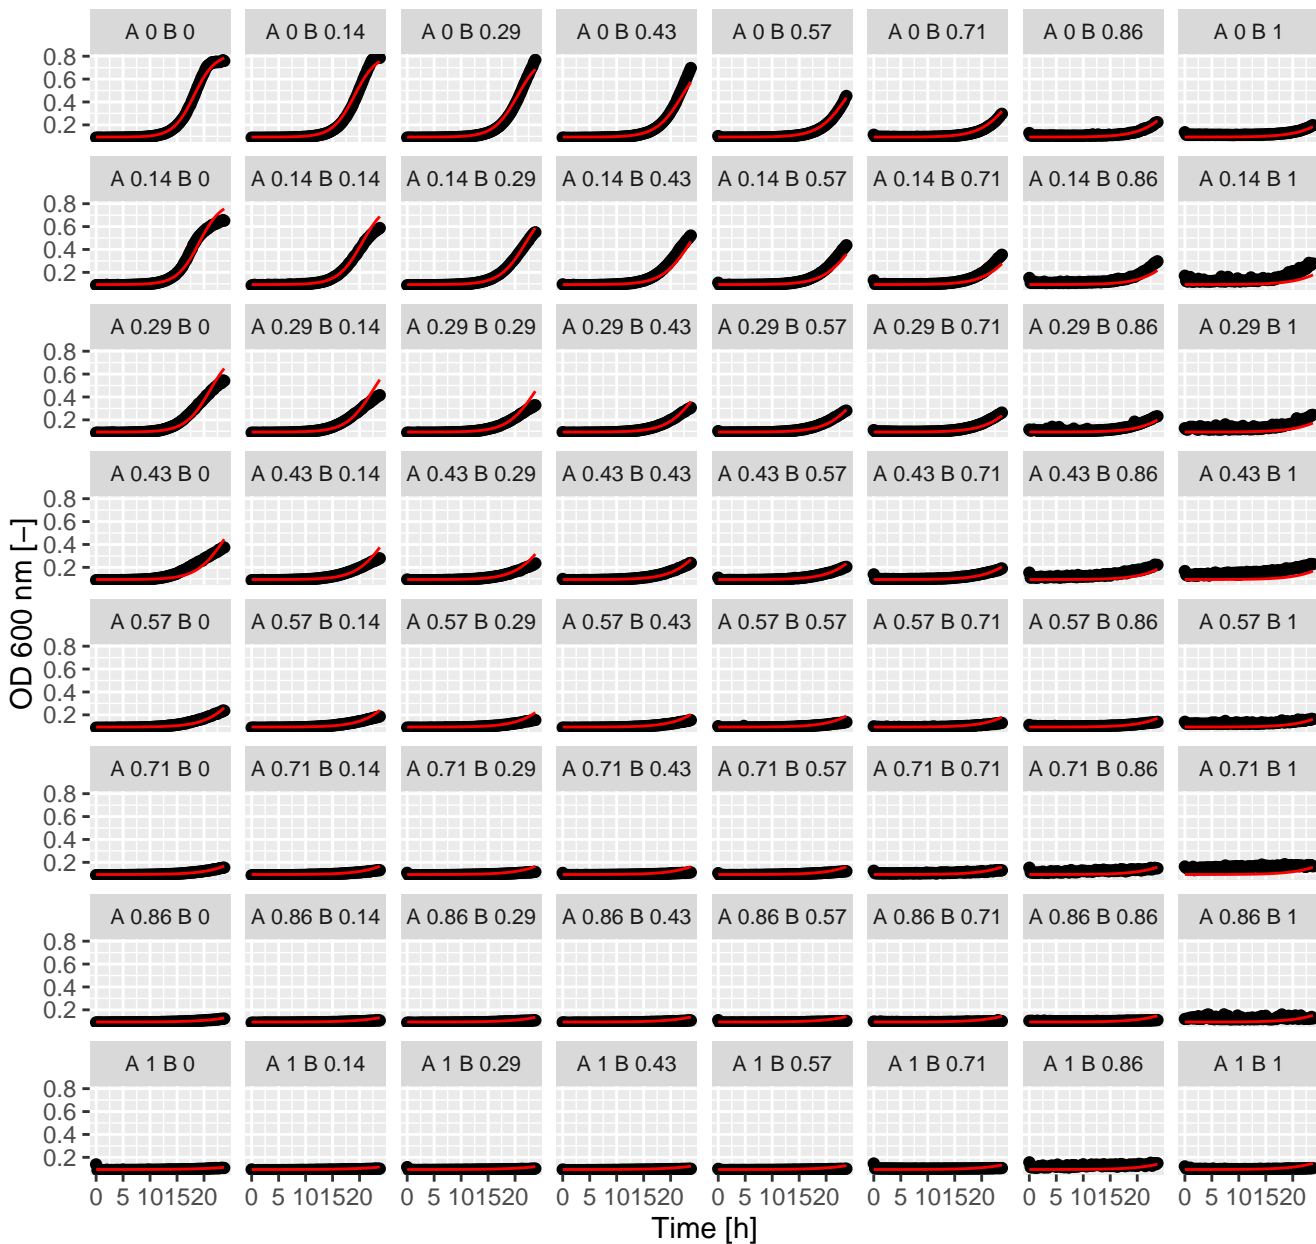

Met.Sta (= Ax.Bx) Greco  
 $\alpha = -1.06$

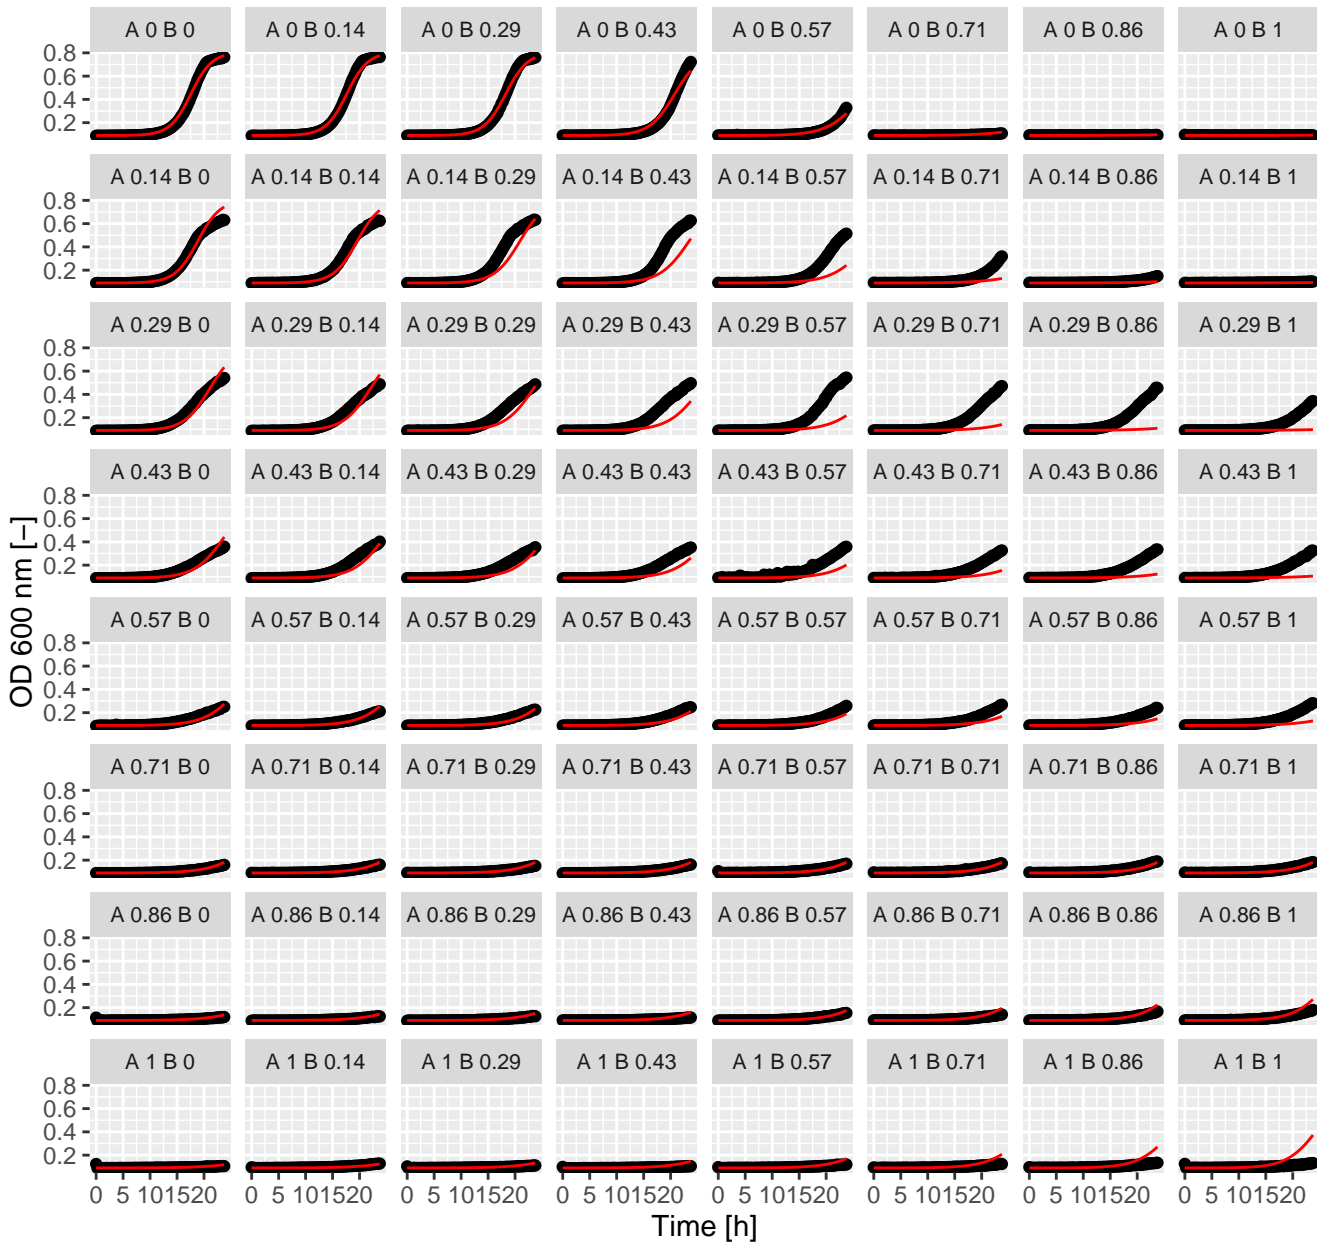

Met.Pen (= Ax.Bx) Greco  
alpha = -0.98

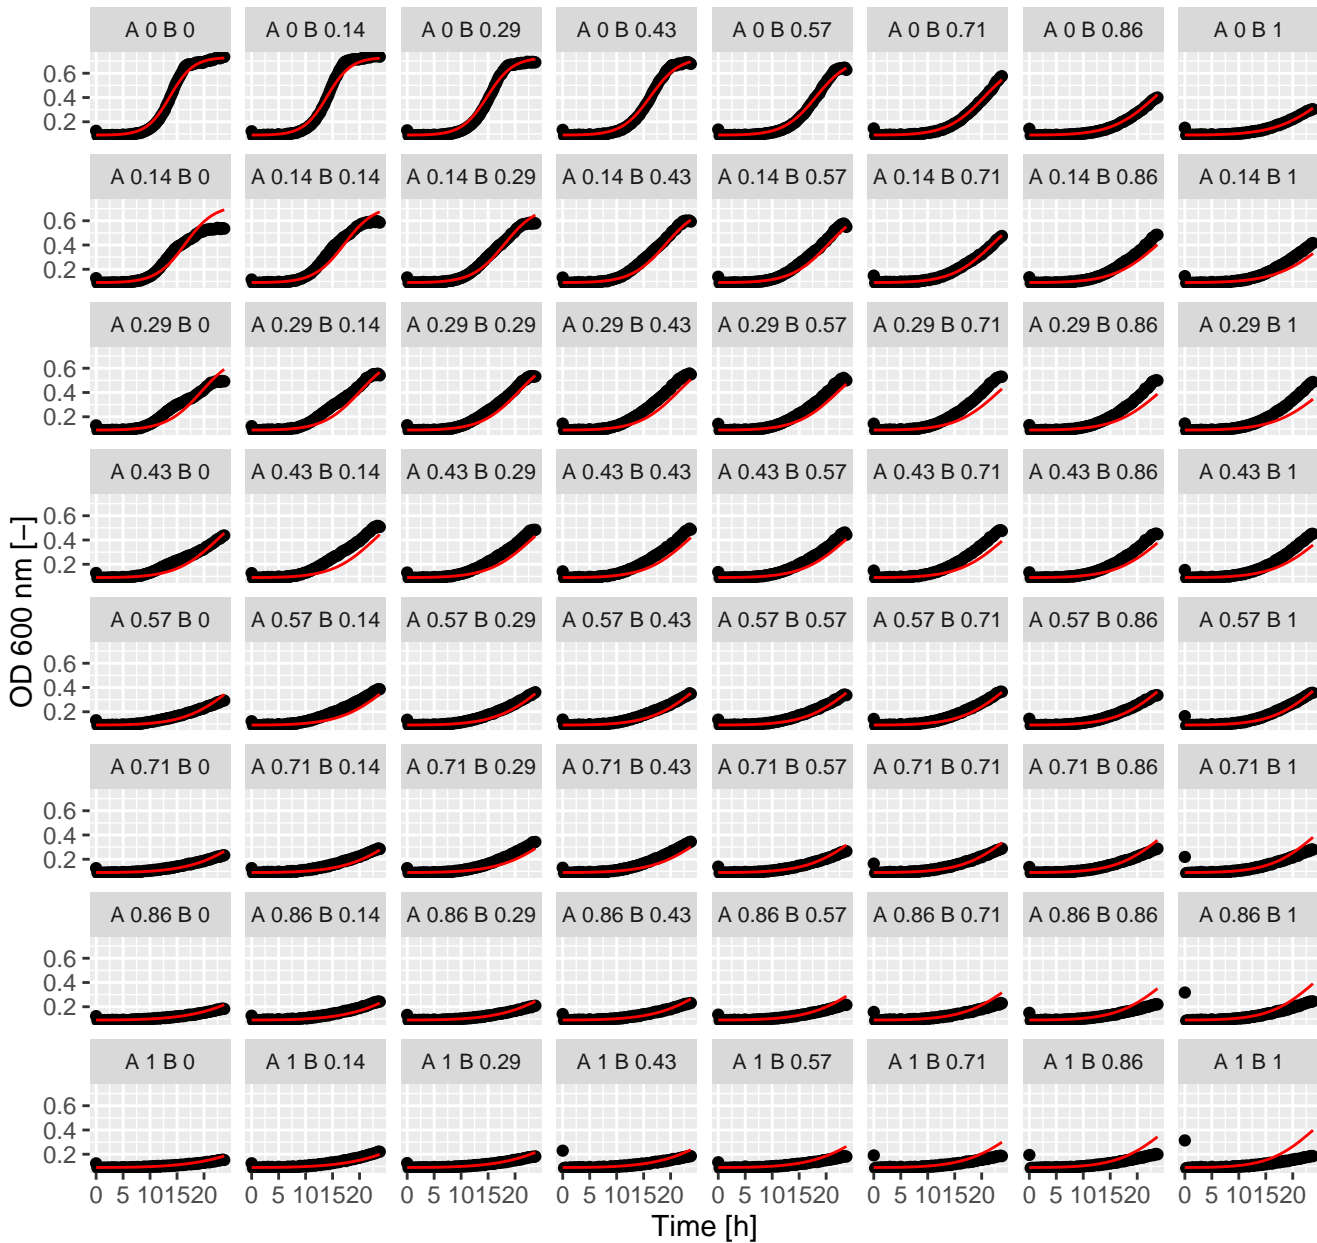

Met.Met (= Ax.Bx) Greco  
alpha = 0.32

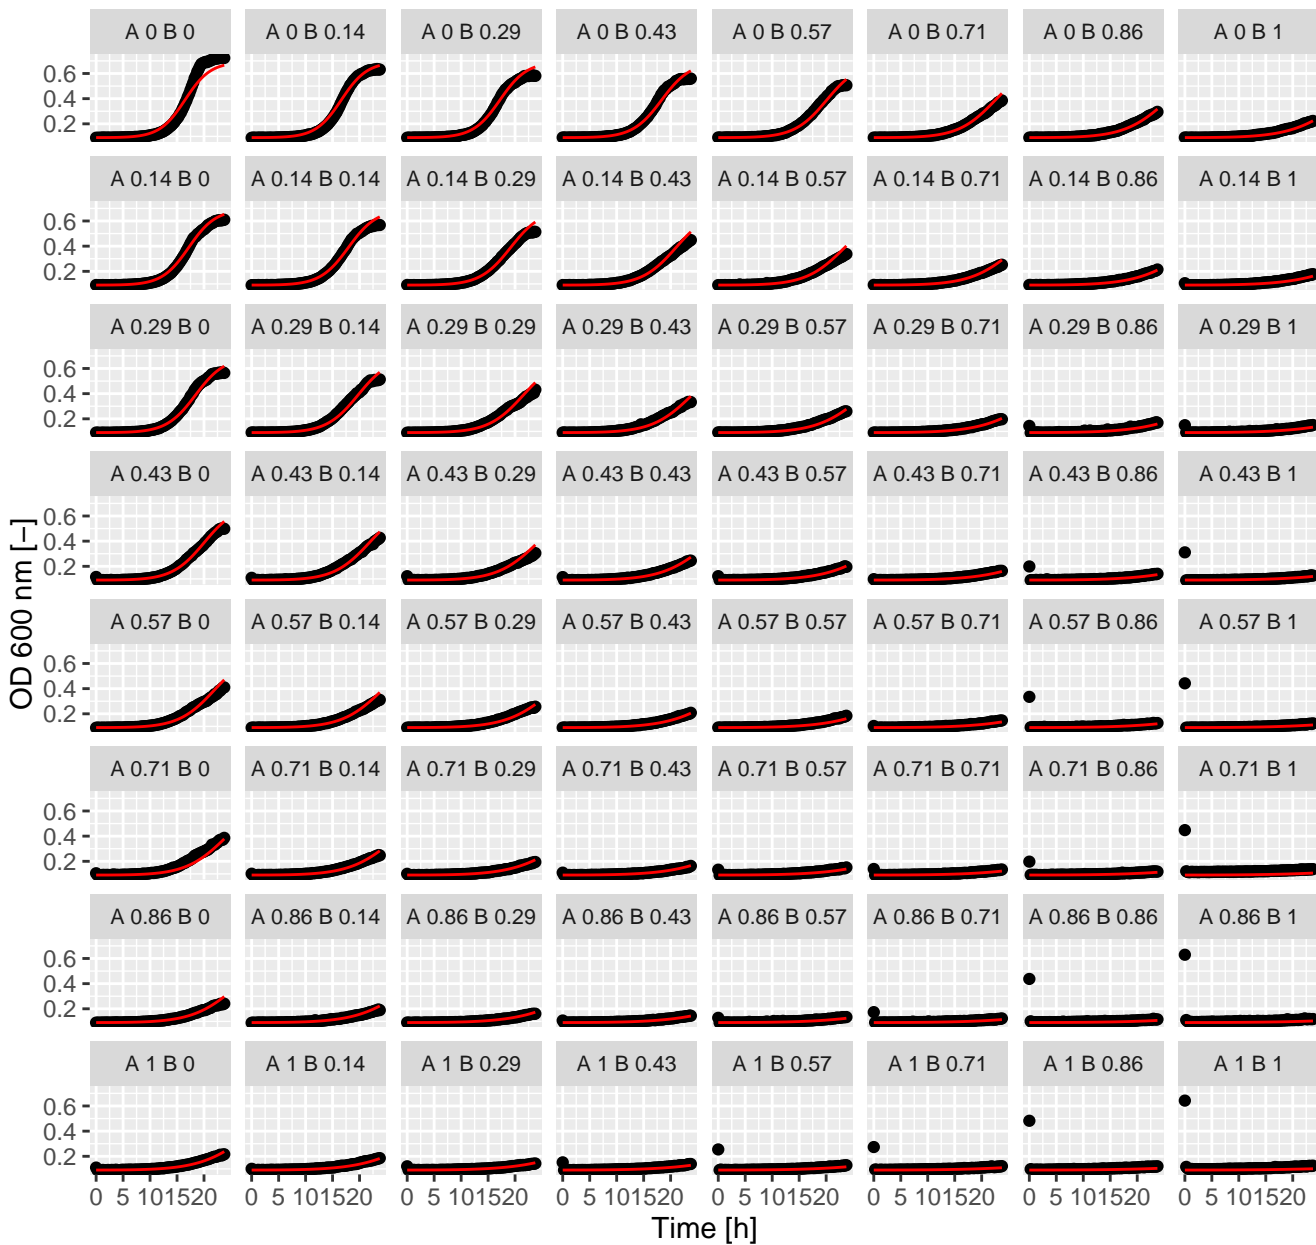

Lit.Tac (= Ax.Bx) Greco  
alpha = 8.94

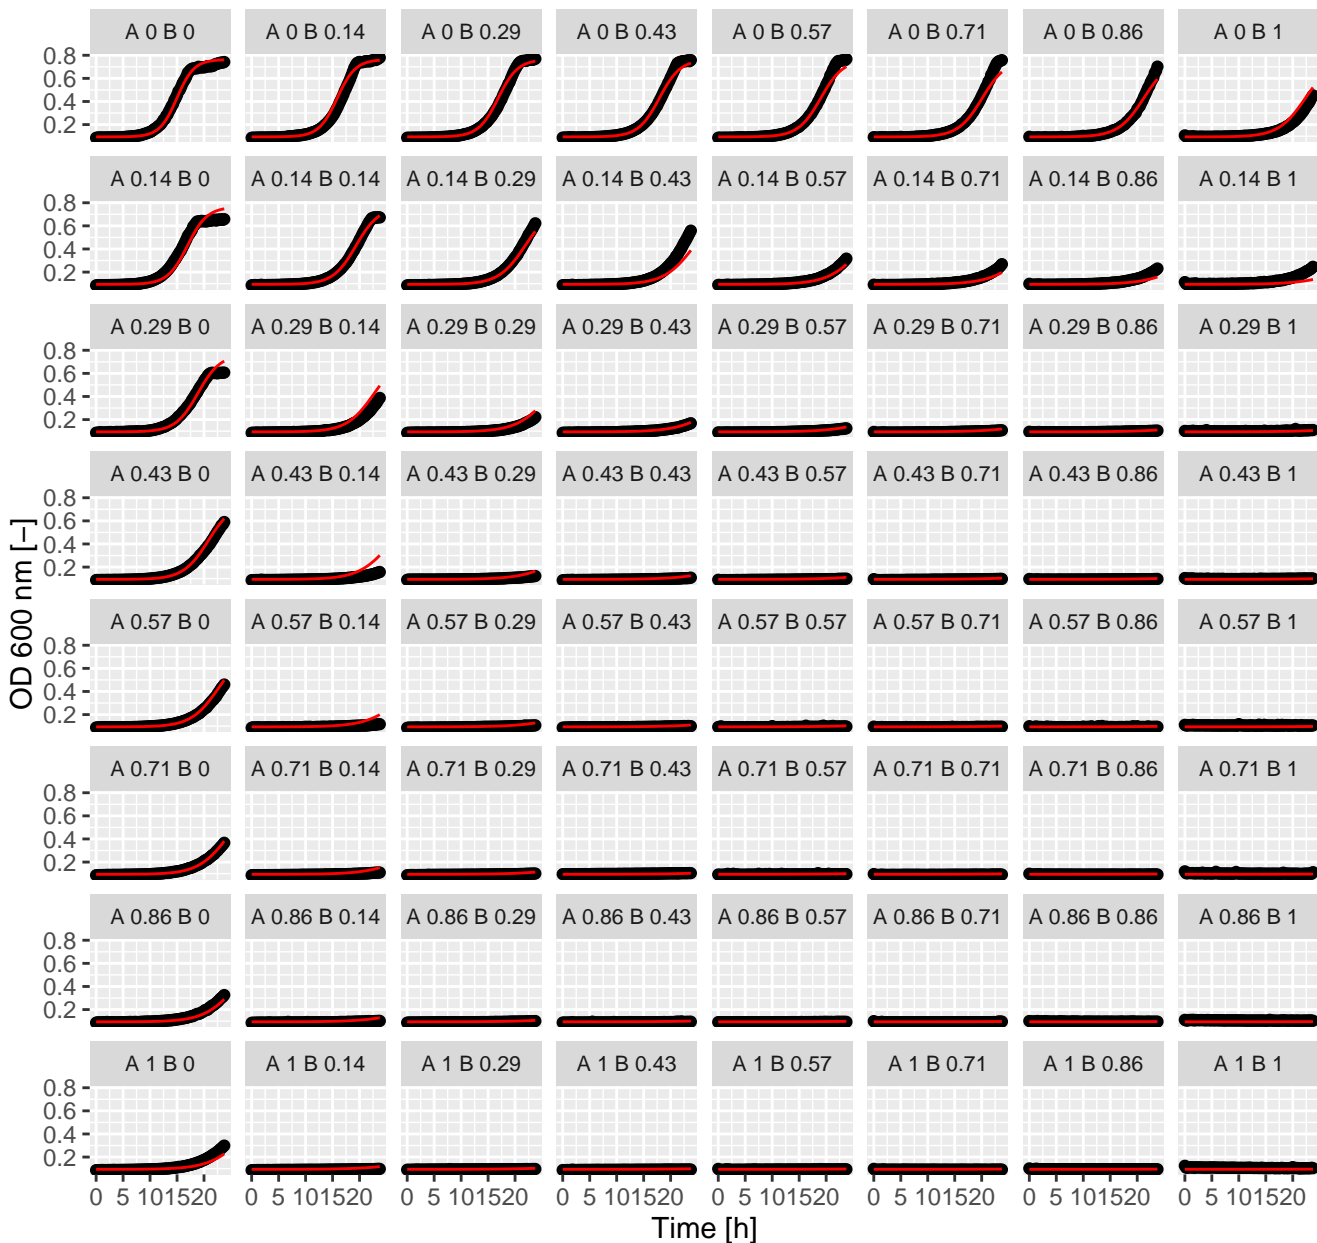

Lit.Sta (= Ax.Bx) Greco  
alpha = -0.47

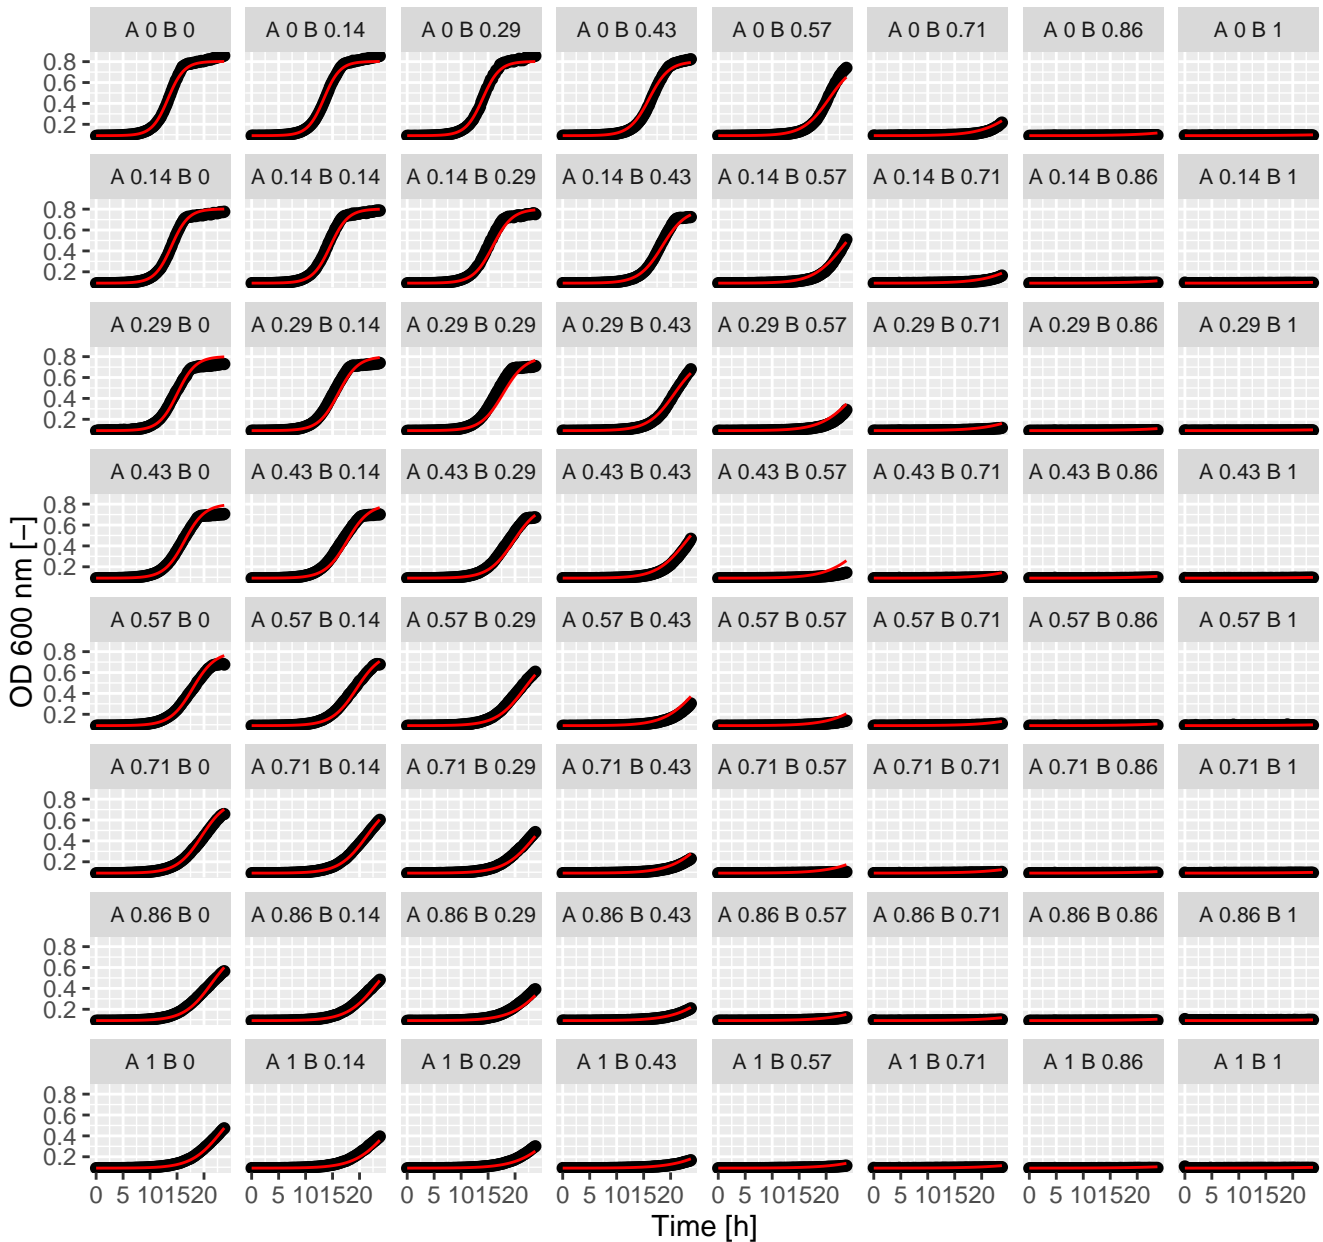



Lit.Rap (= Ax.Bx) Greco  
 $\alpha = -0.17$

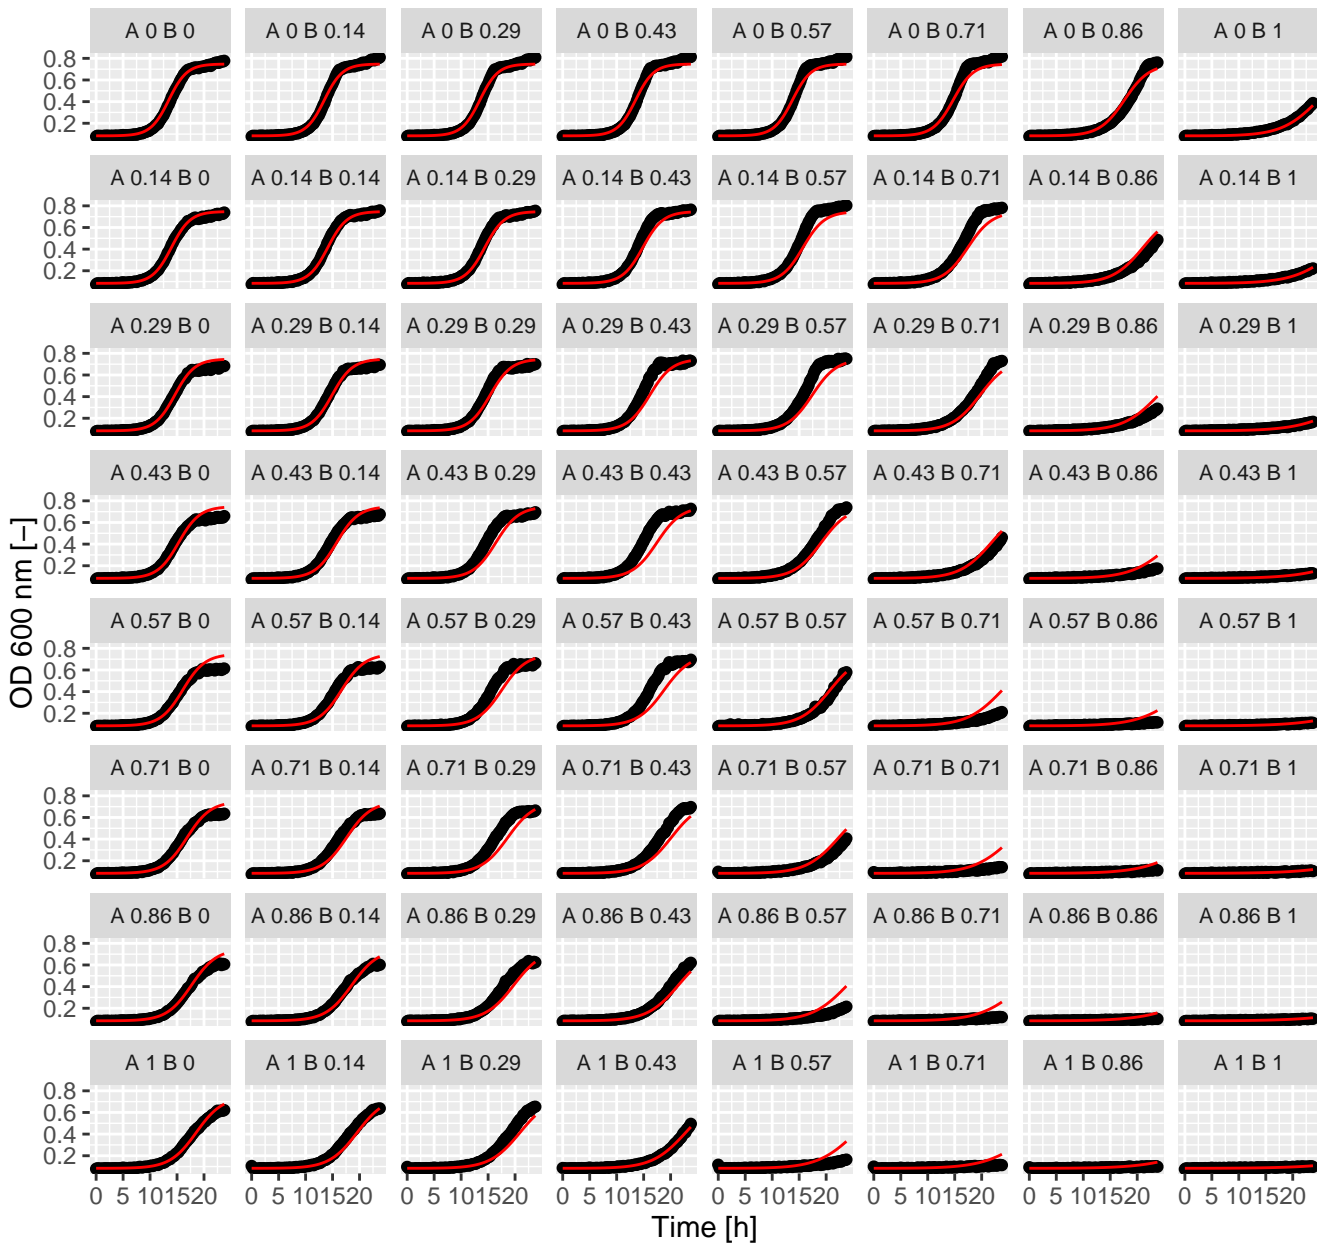

Lit.Rad (= Ax.Bx) Greco  
alpha = 0.51

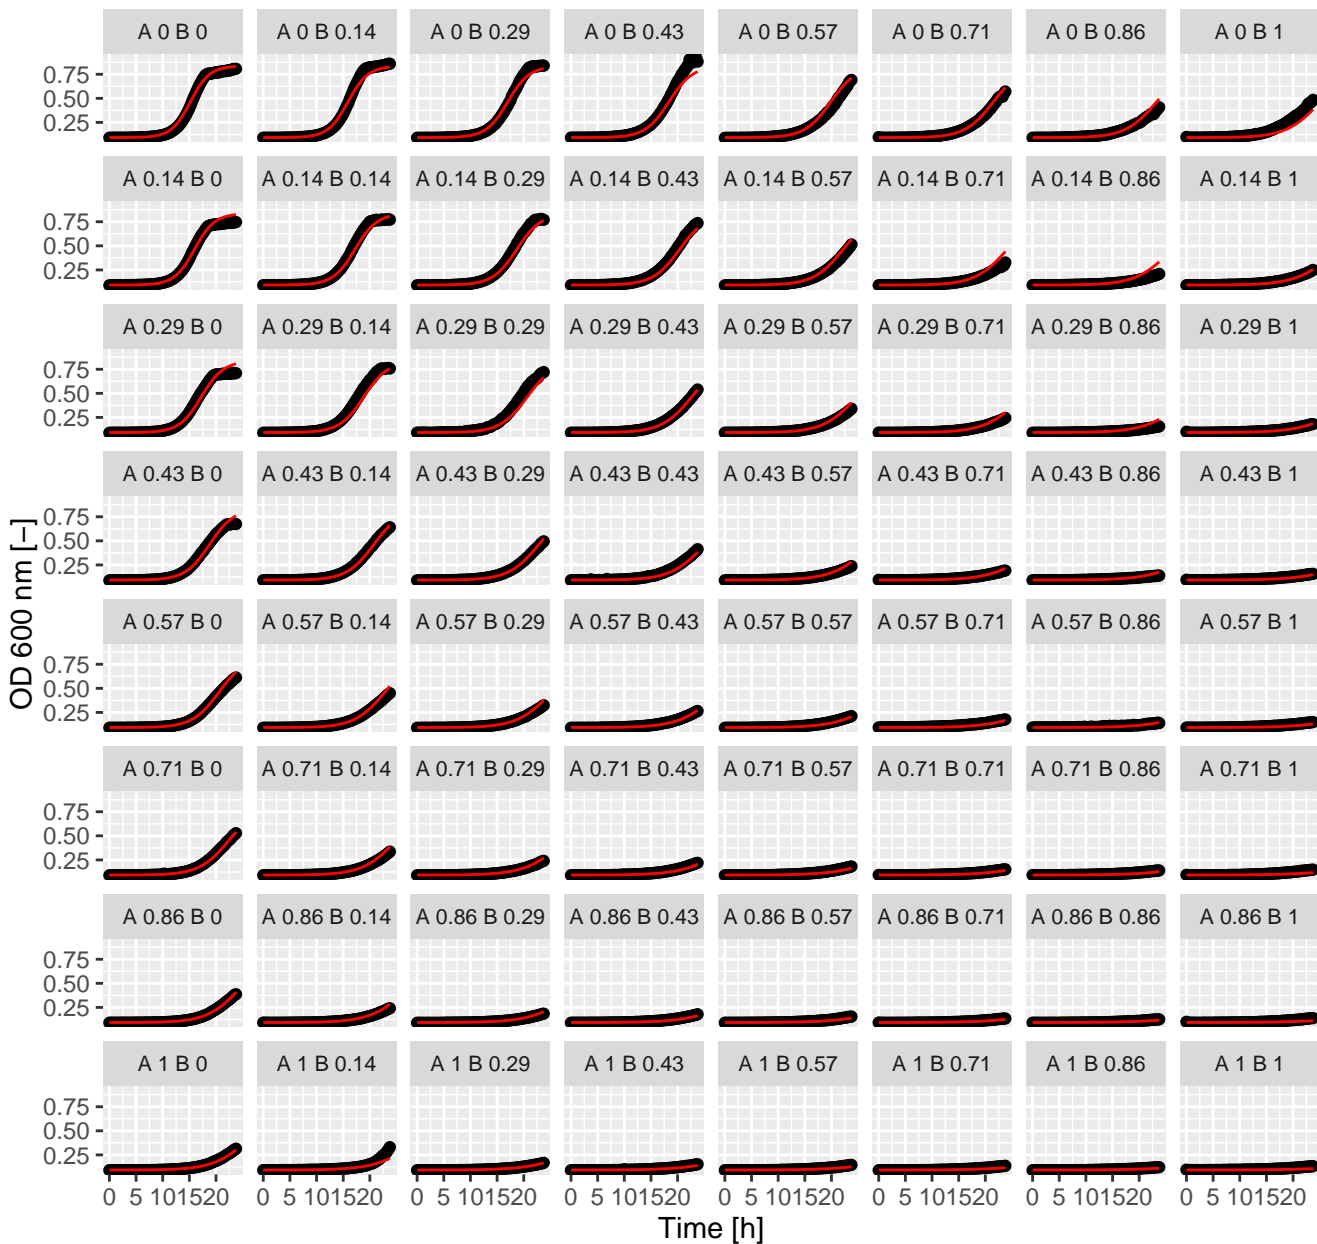

Lat.Tun (= Ax.Bx) Greco  
 $\alpha = -0.66$

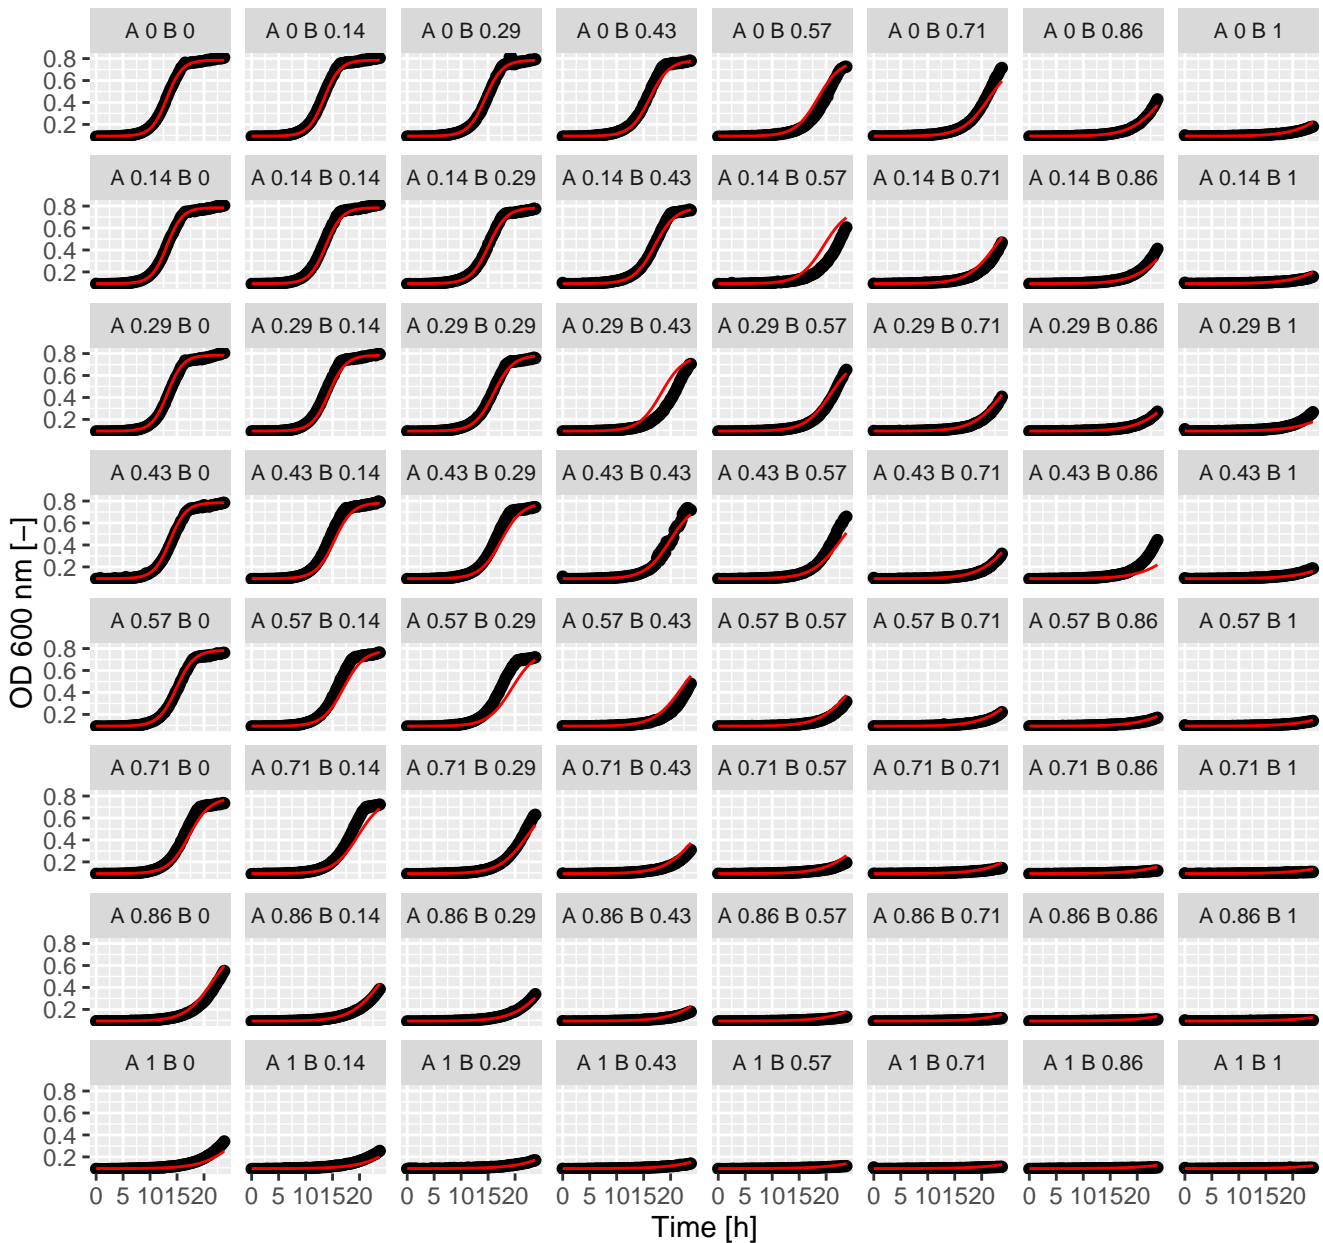

Lat.Ter (= Ax.Bx) Greco  
alpha = 8.89

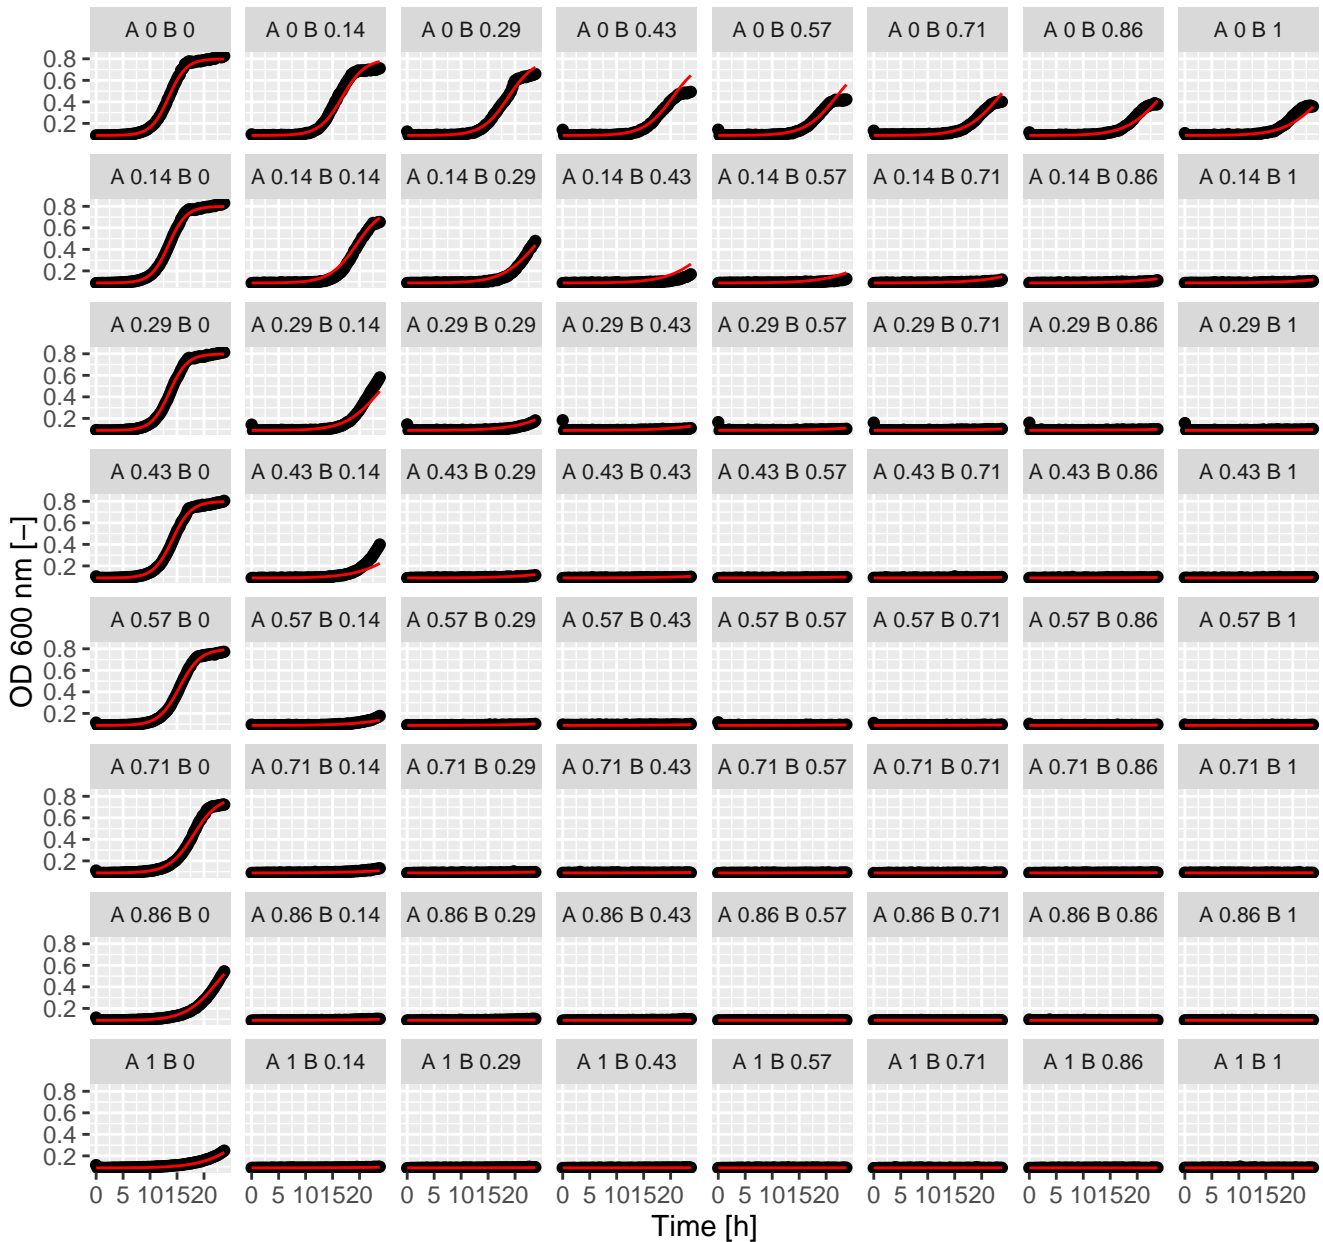

Lat.Tam (= Ax.Bx) Greco  
alpha = -0.2

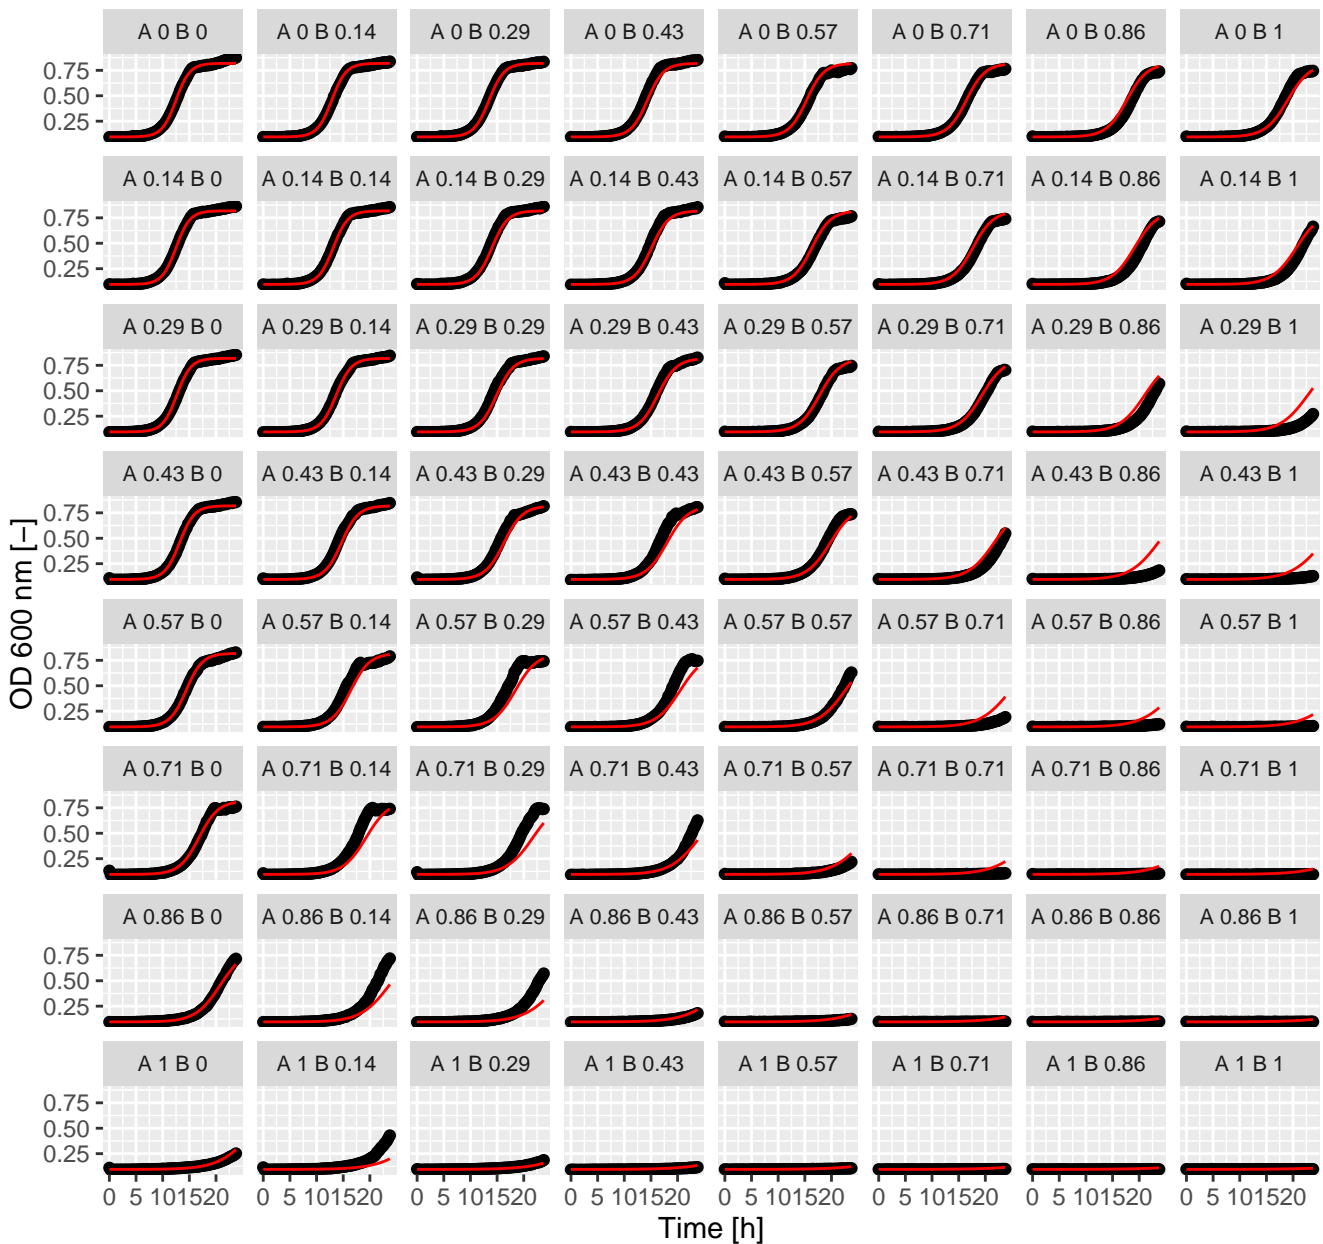

Lat.Tac (= Ax.Bx) Greco  
alpha = 185.05

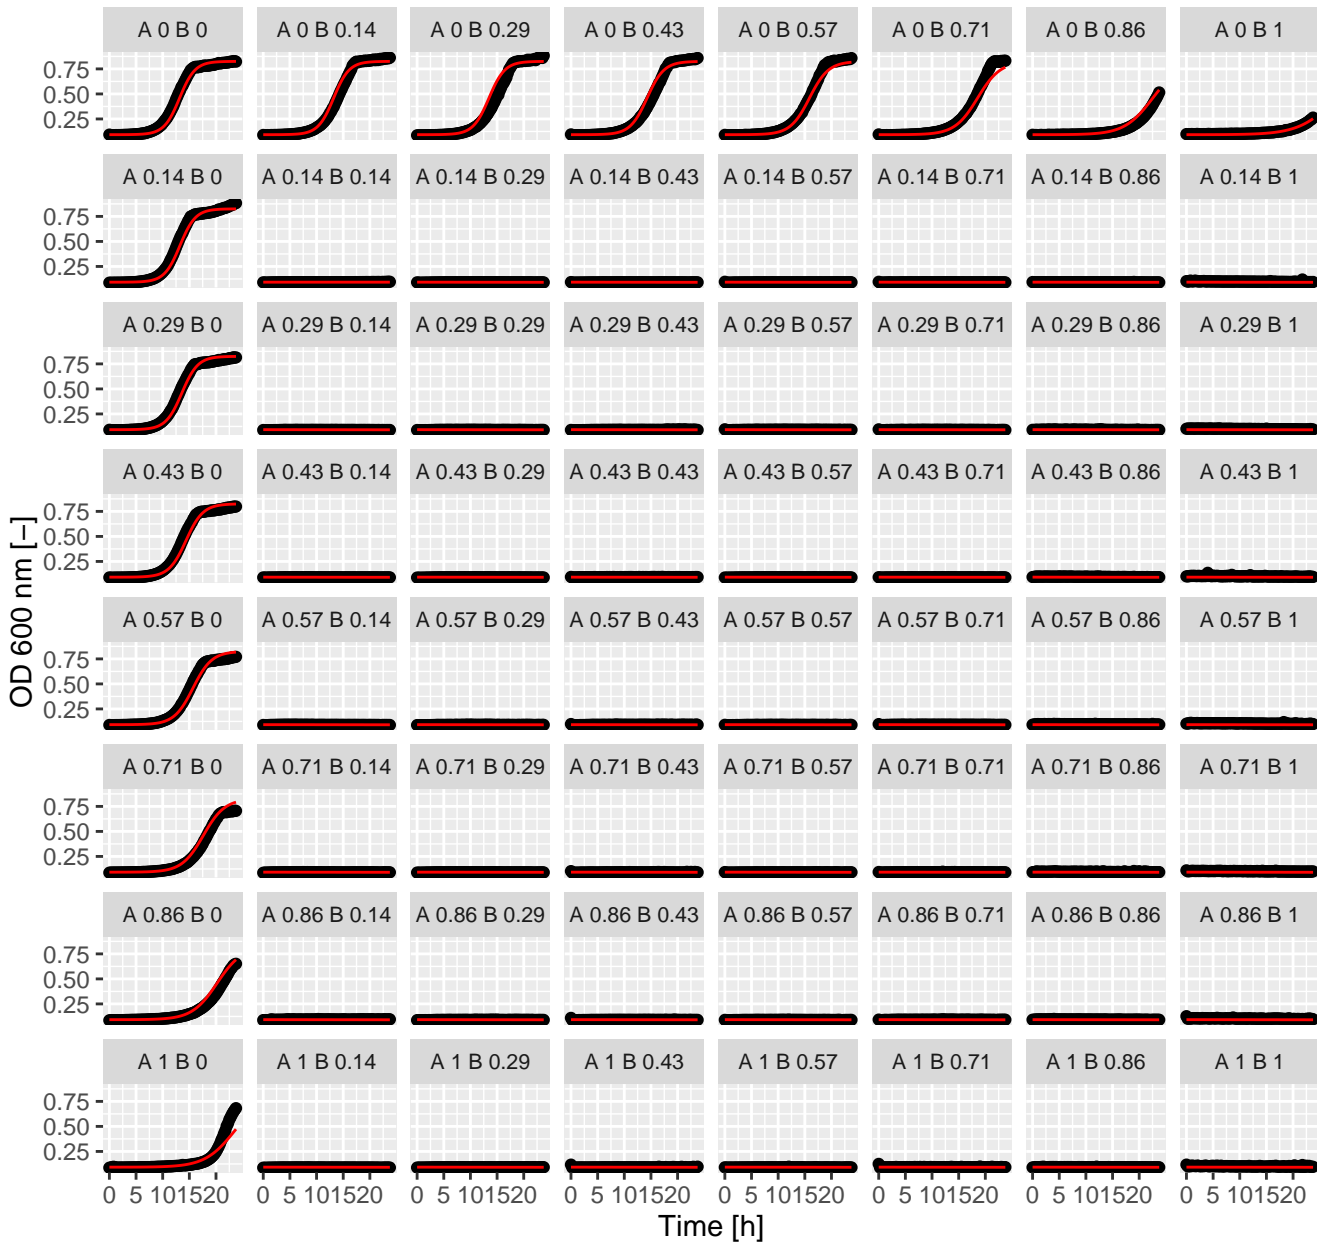

Lat.Sta (= Ax.Bx) Greco  
 $\alpha = -0.92$

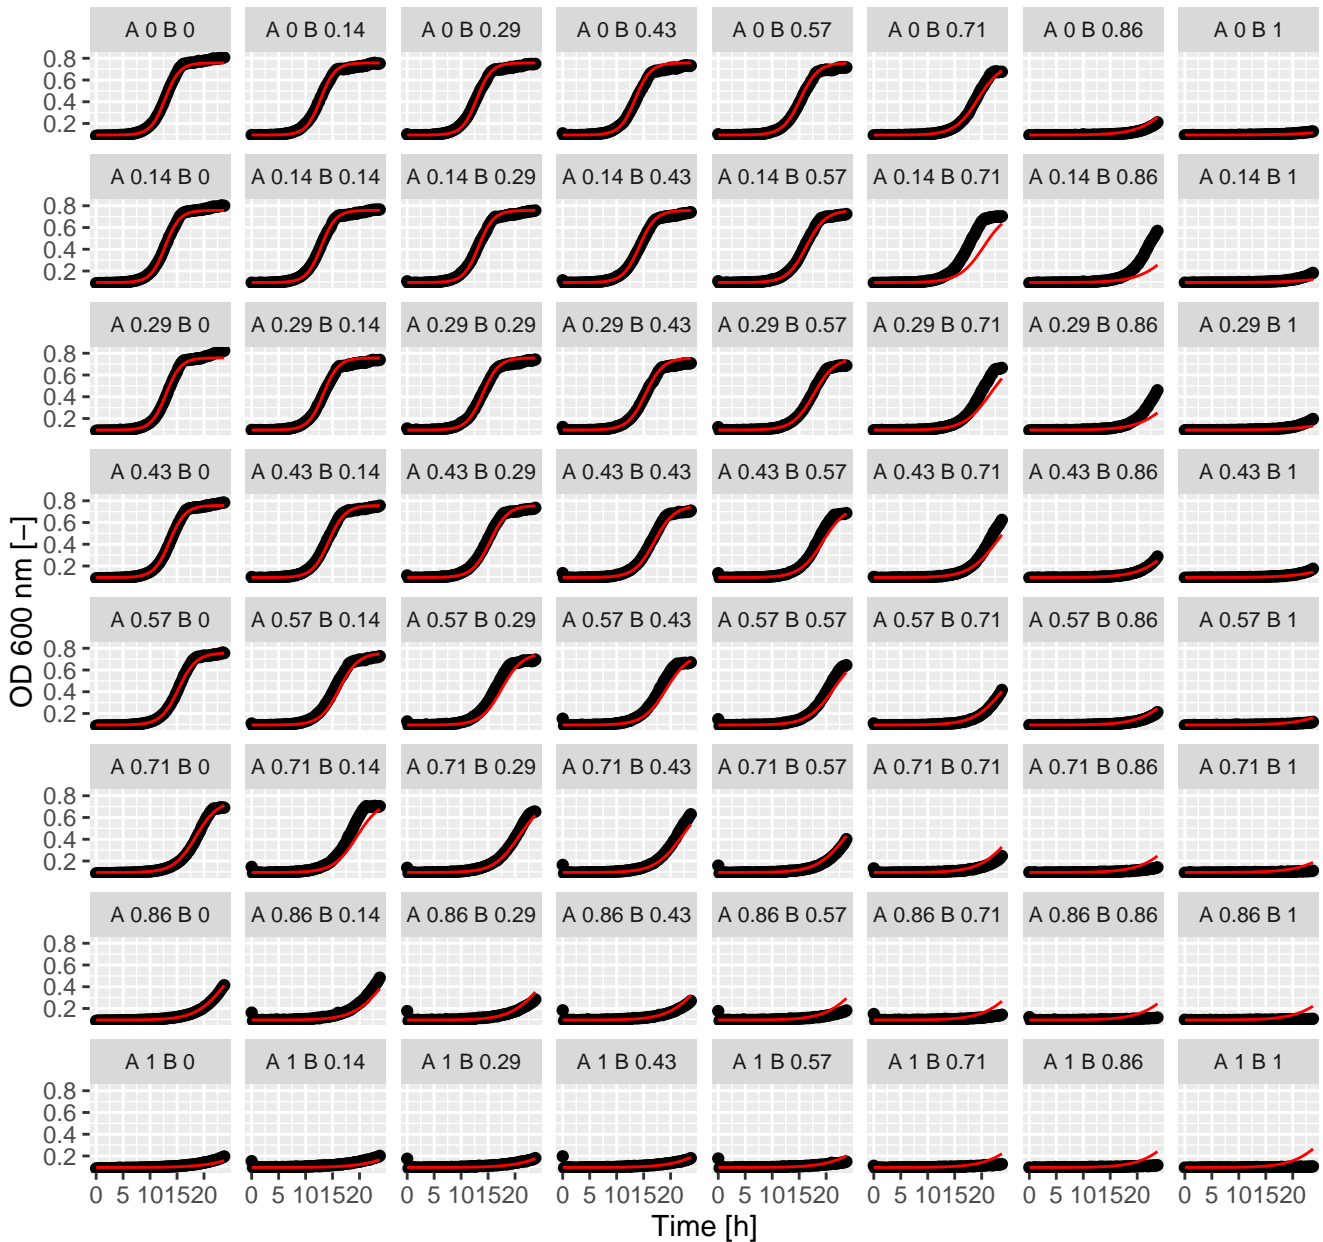

Lat.Rap (= Ax.Bx) Greco  
 $\alpha = -0.75$

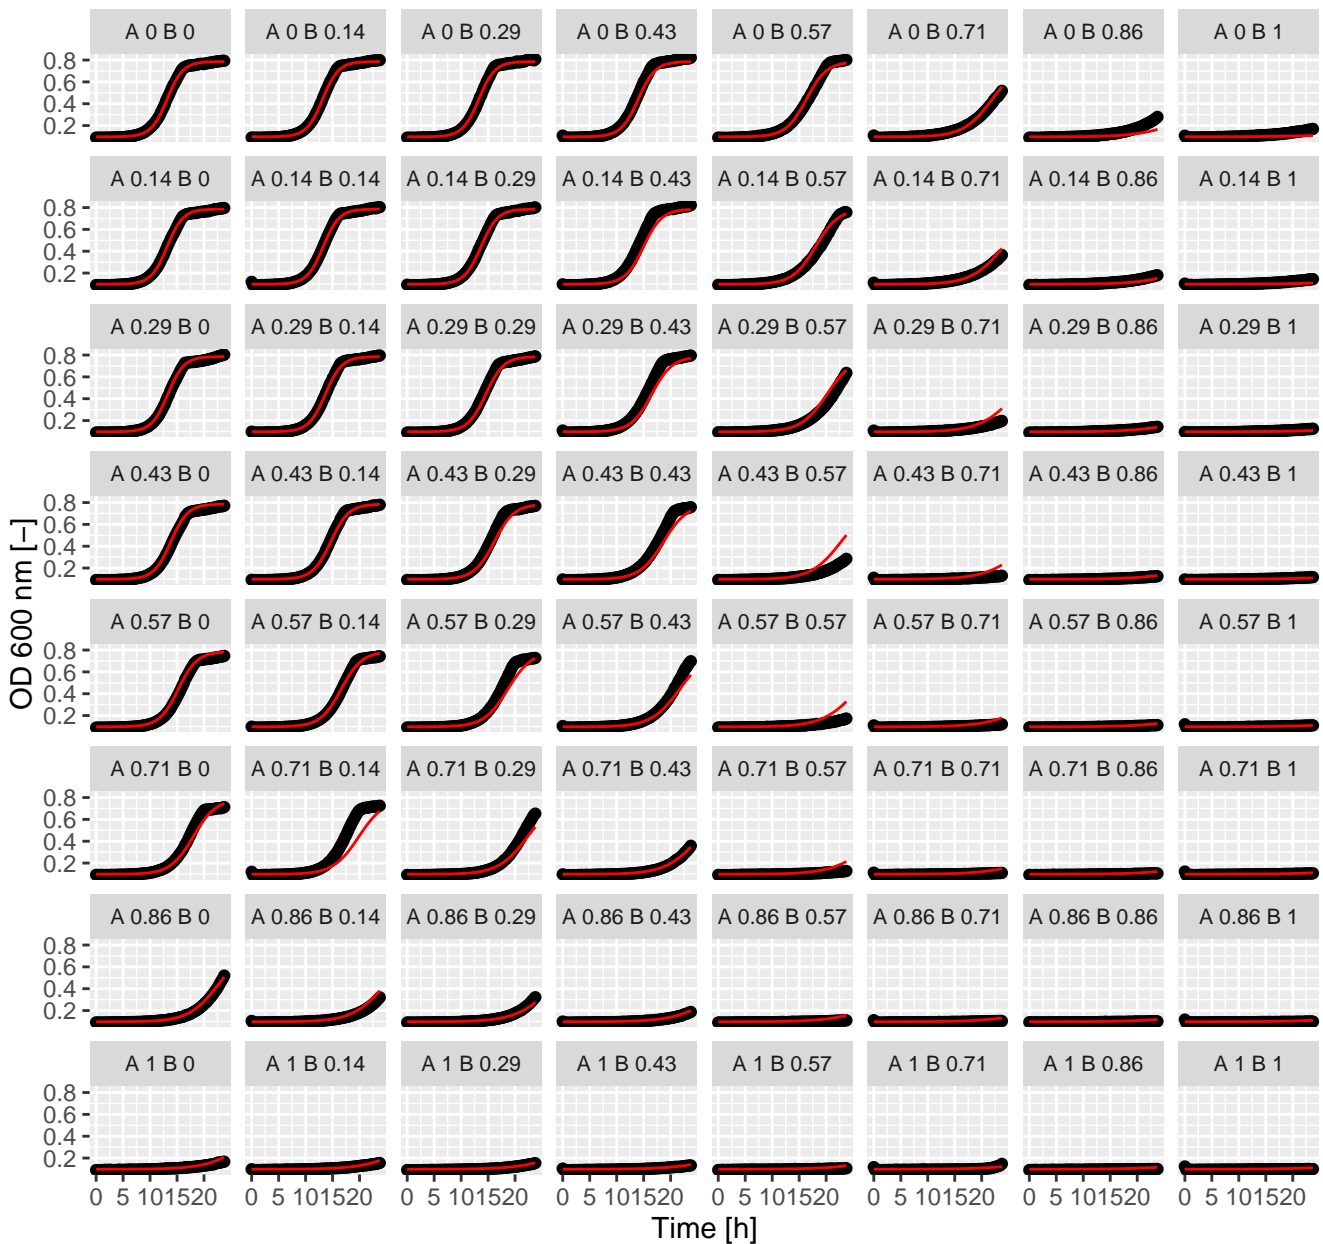



Lat.Rad (= Ax.Bx) Greco  
 $\alpha = -1.32$

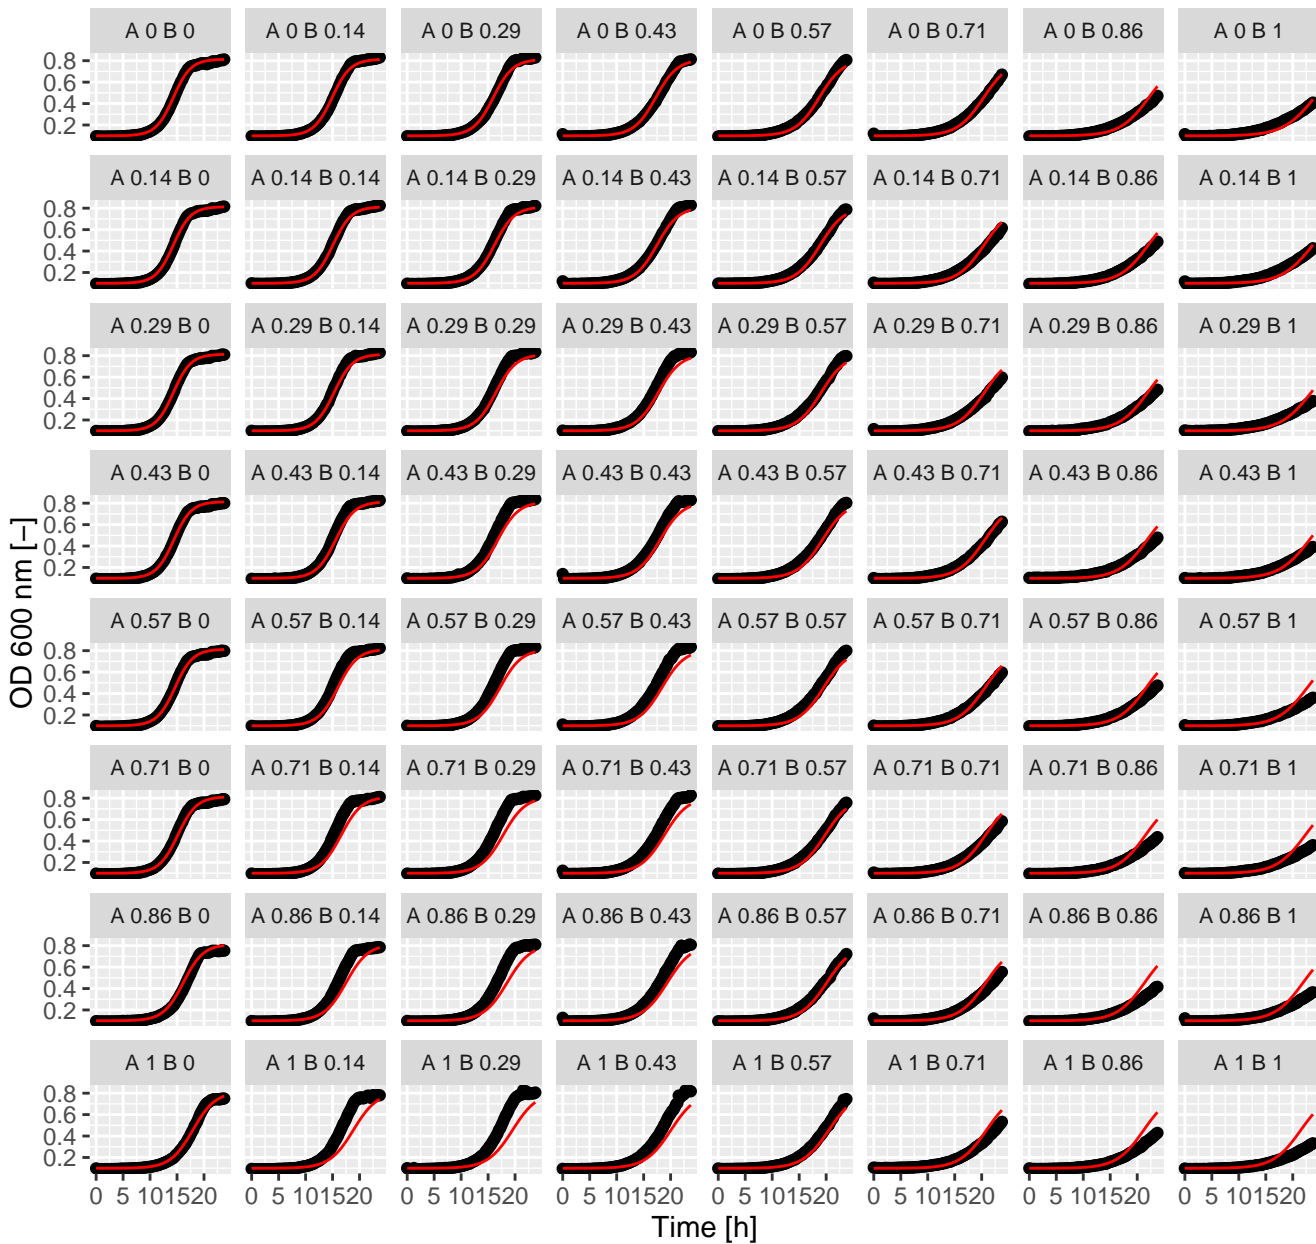

Lat.Qmy (= Ax.Bx) Greco  
 $\alpha = -1.16$

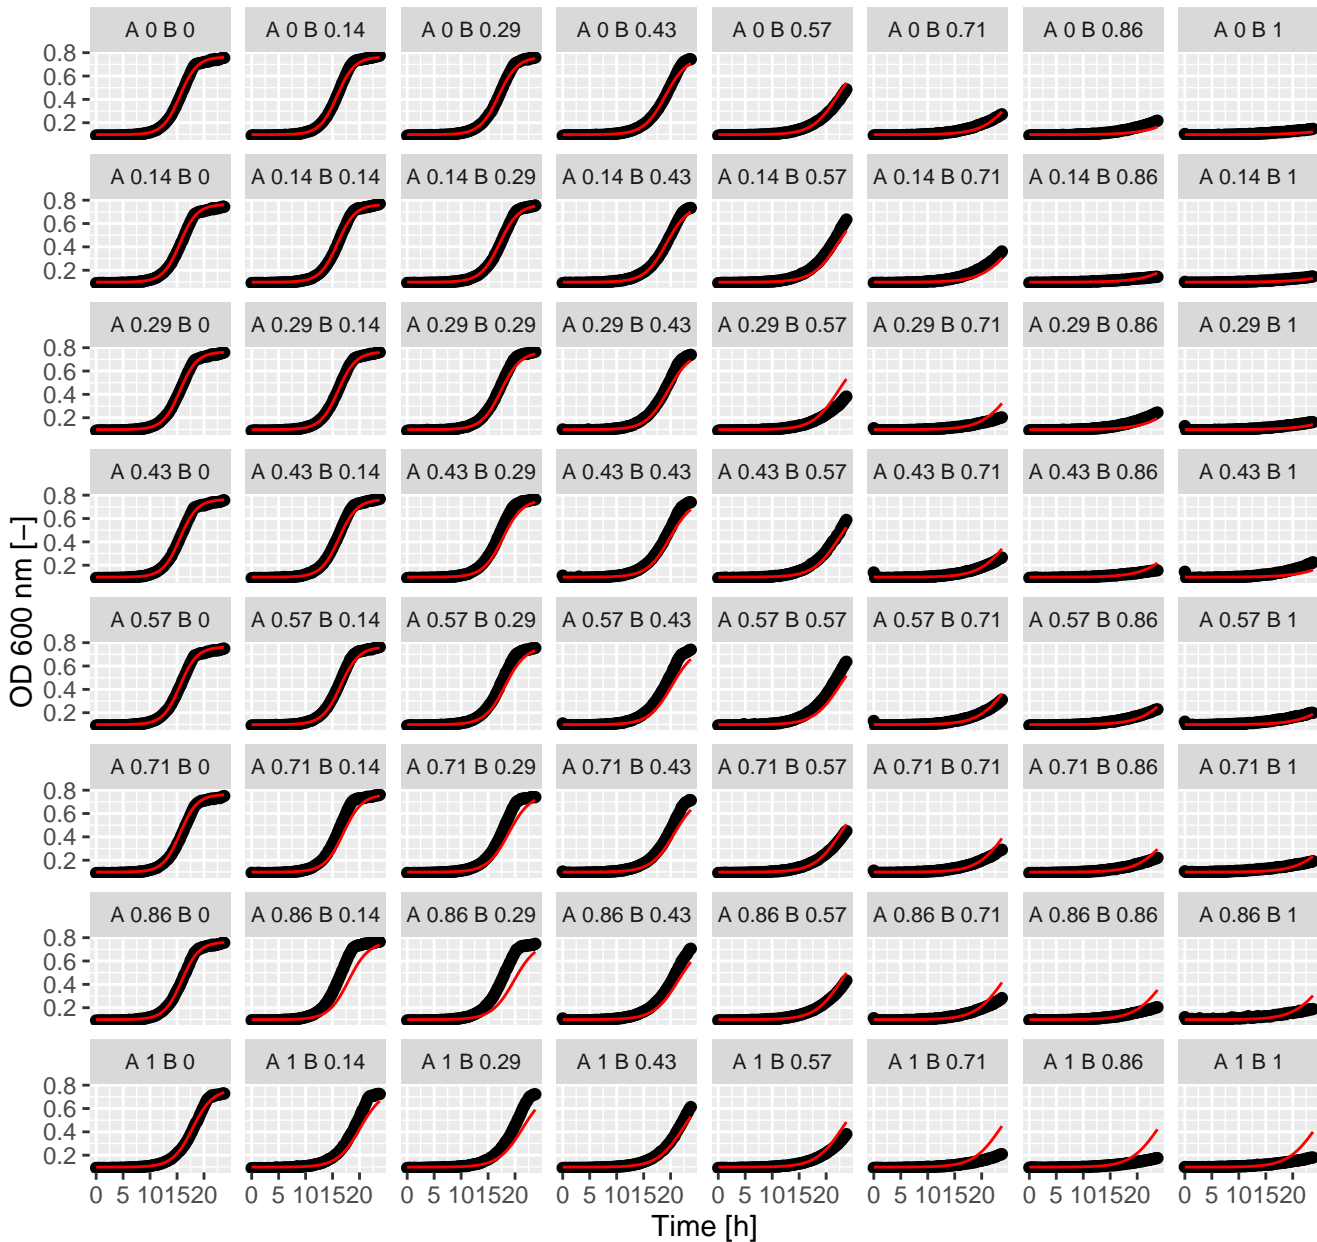

Lat.Pen (= Ax.Bx) Greco  
alpha = 1.21

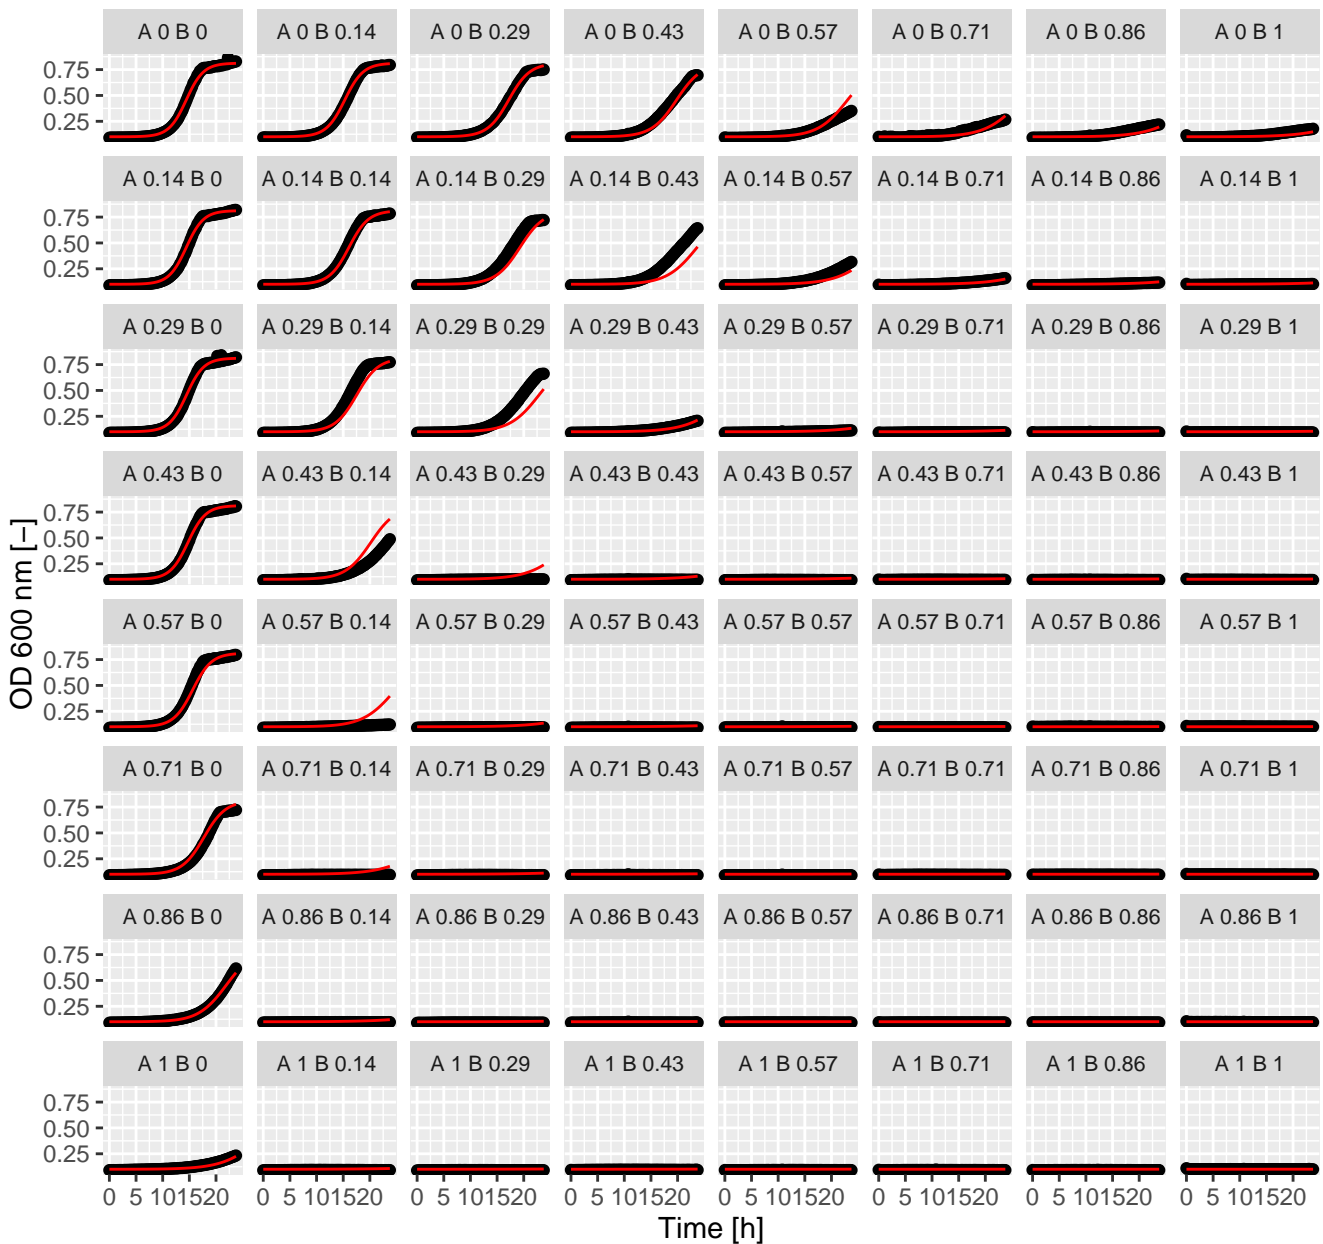

Lat.Myr (= Ax.Bx) Greco  
 $\alpha = -0.13$

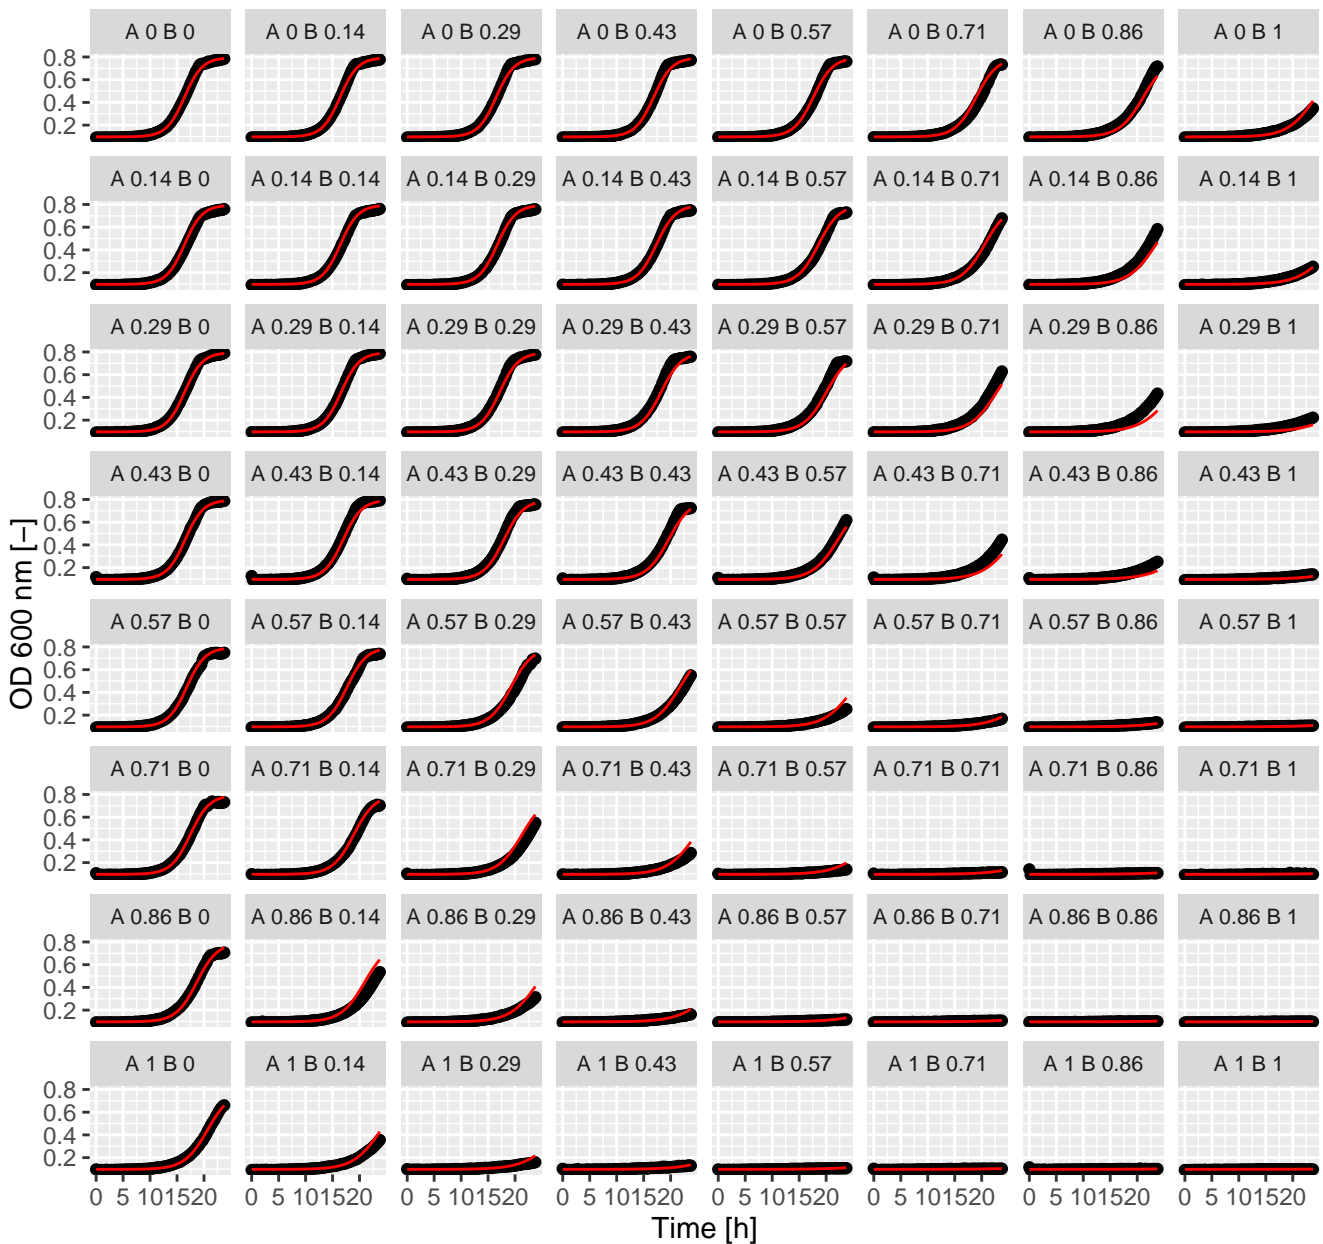

Lat.MMS (= Ax.Bx) Greco  
 $\alpha = -0.62$

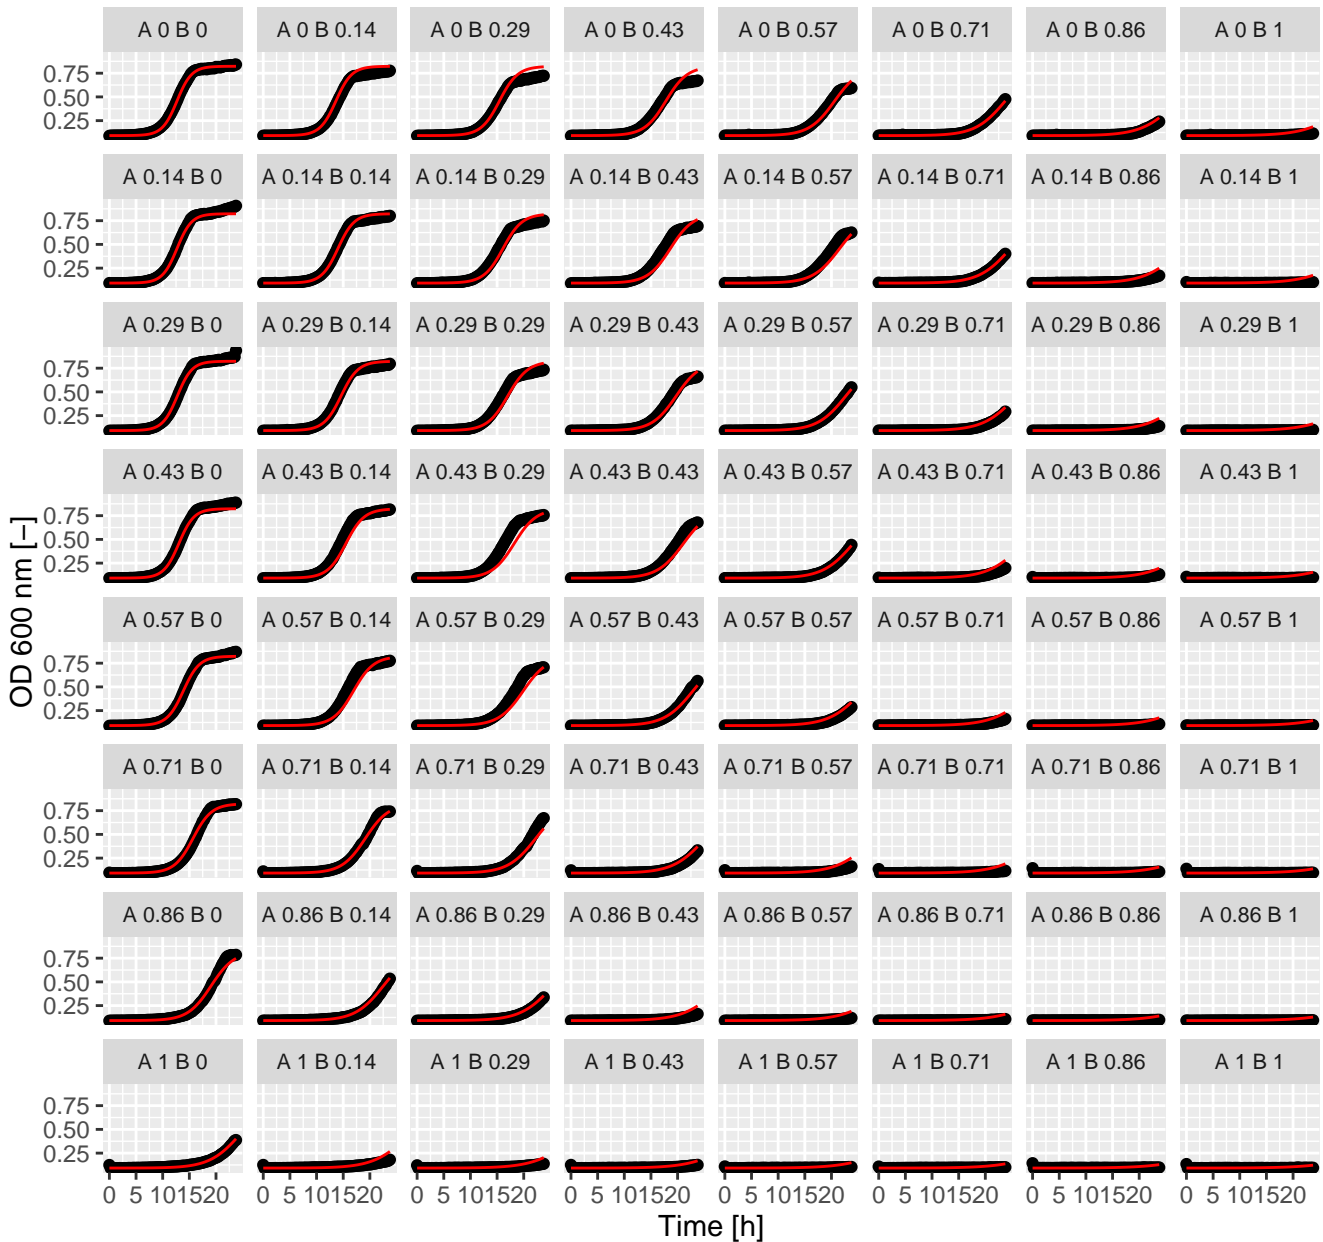

Lat.Met (= Ax.Bx) Greco  
 $\alpha = -1.02$

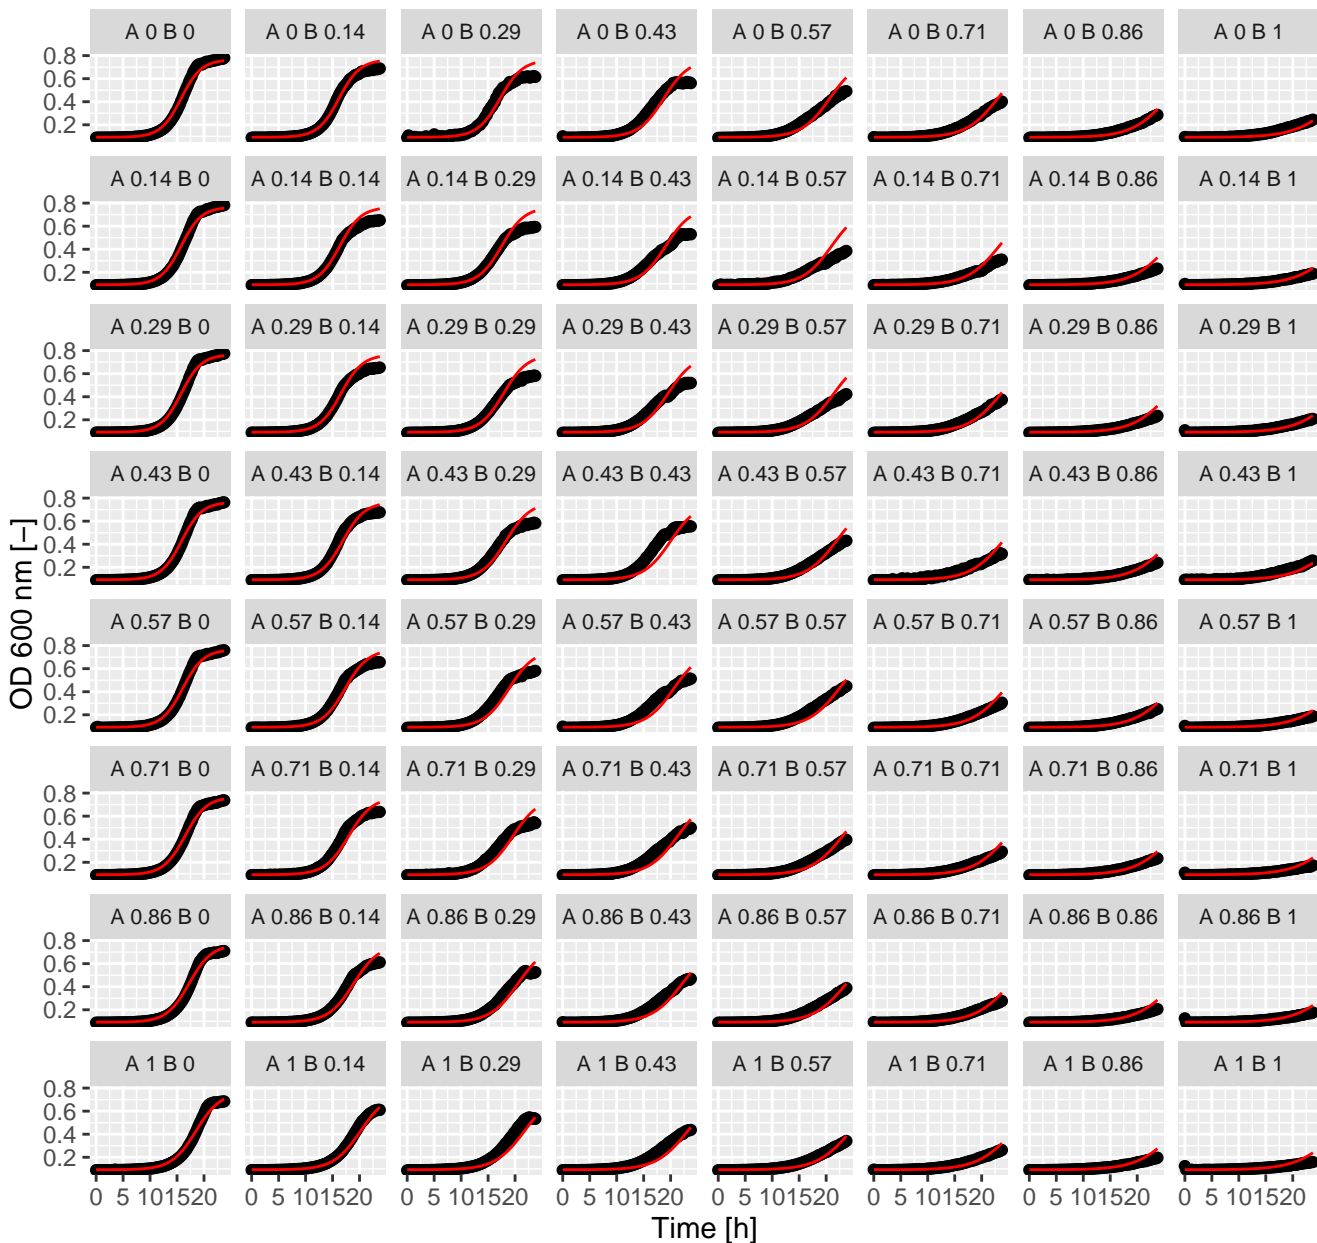

Lat.Lat (= Ax.Bx) Greco  
 $\alpha = -0.41$

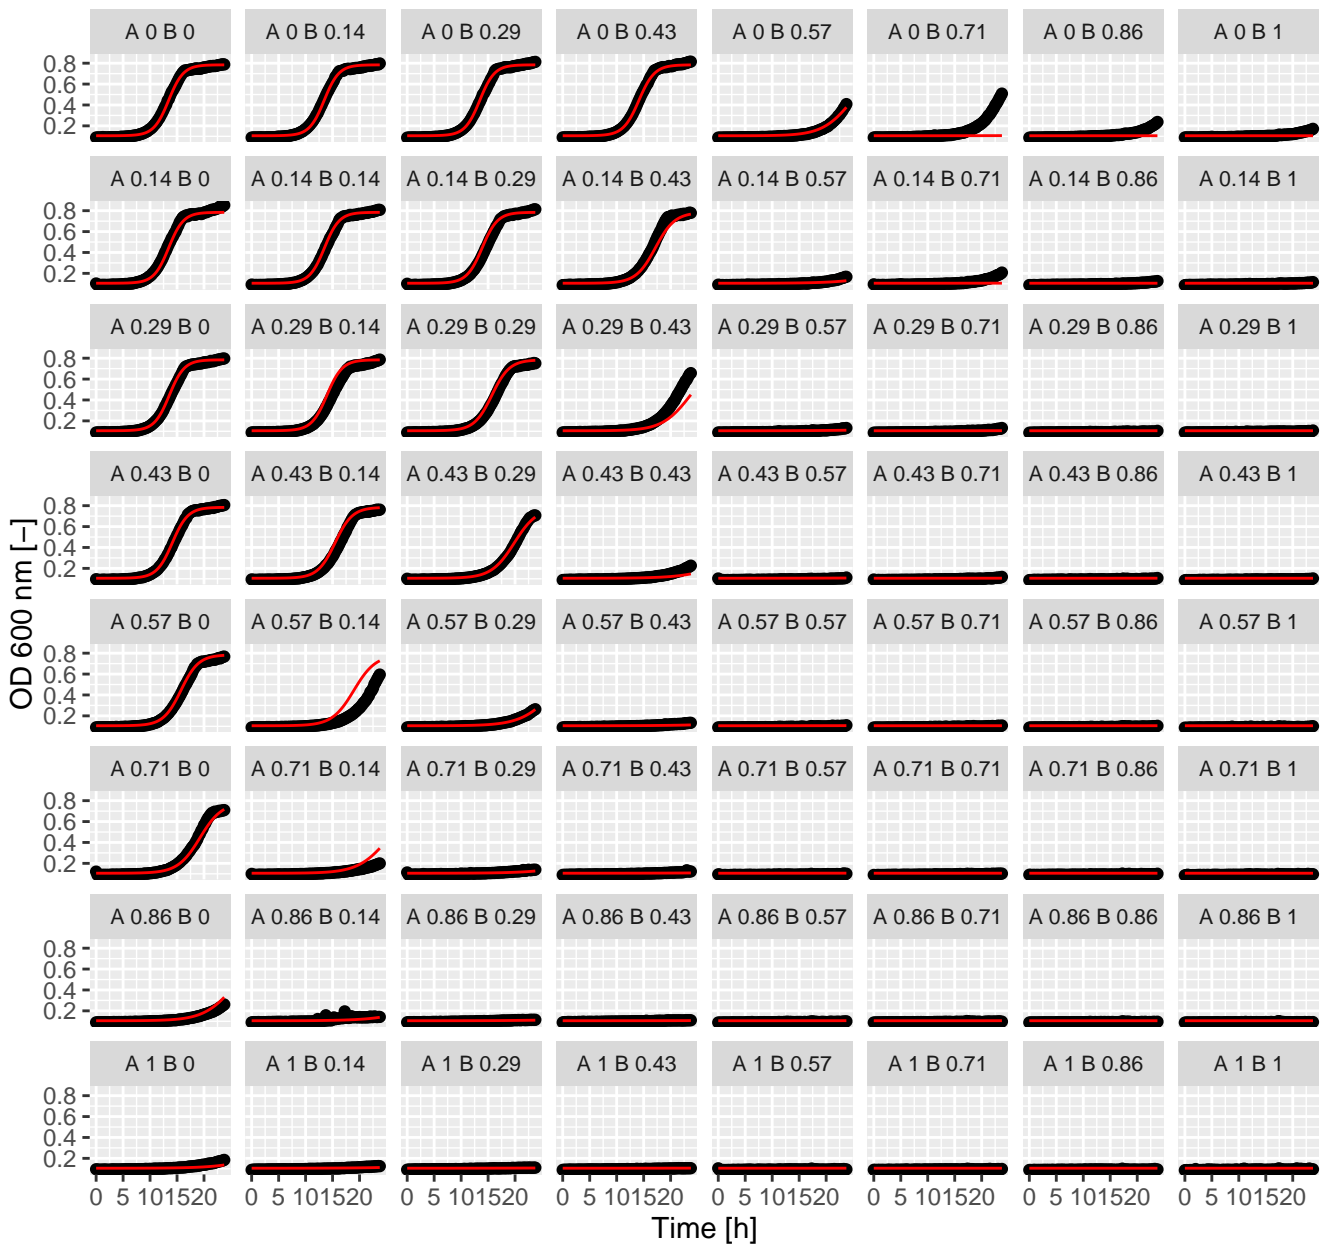

Hyg.Sta (= Ax.Bx) Greco  
 $\alpha = -0.45$

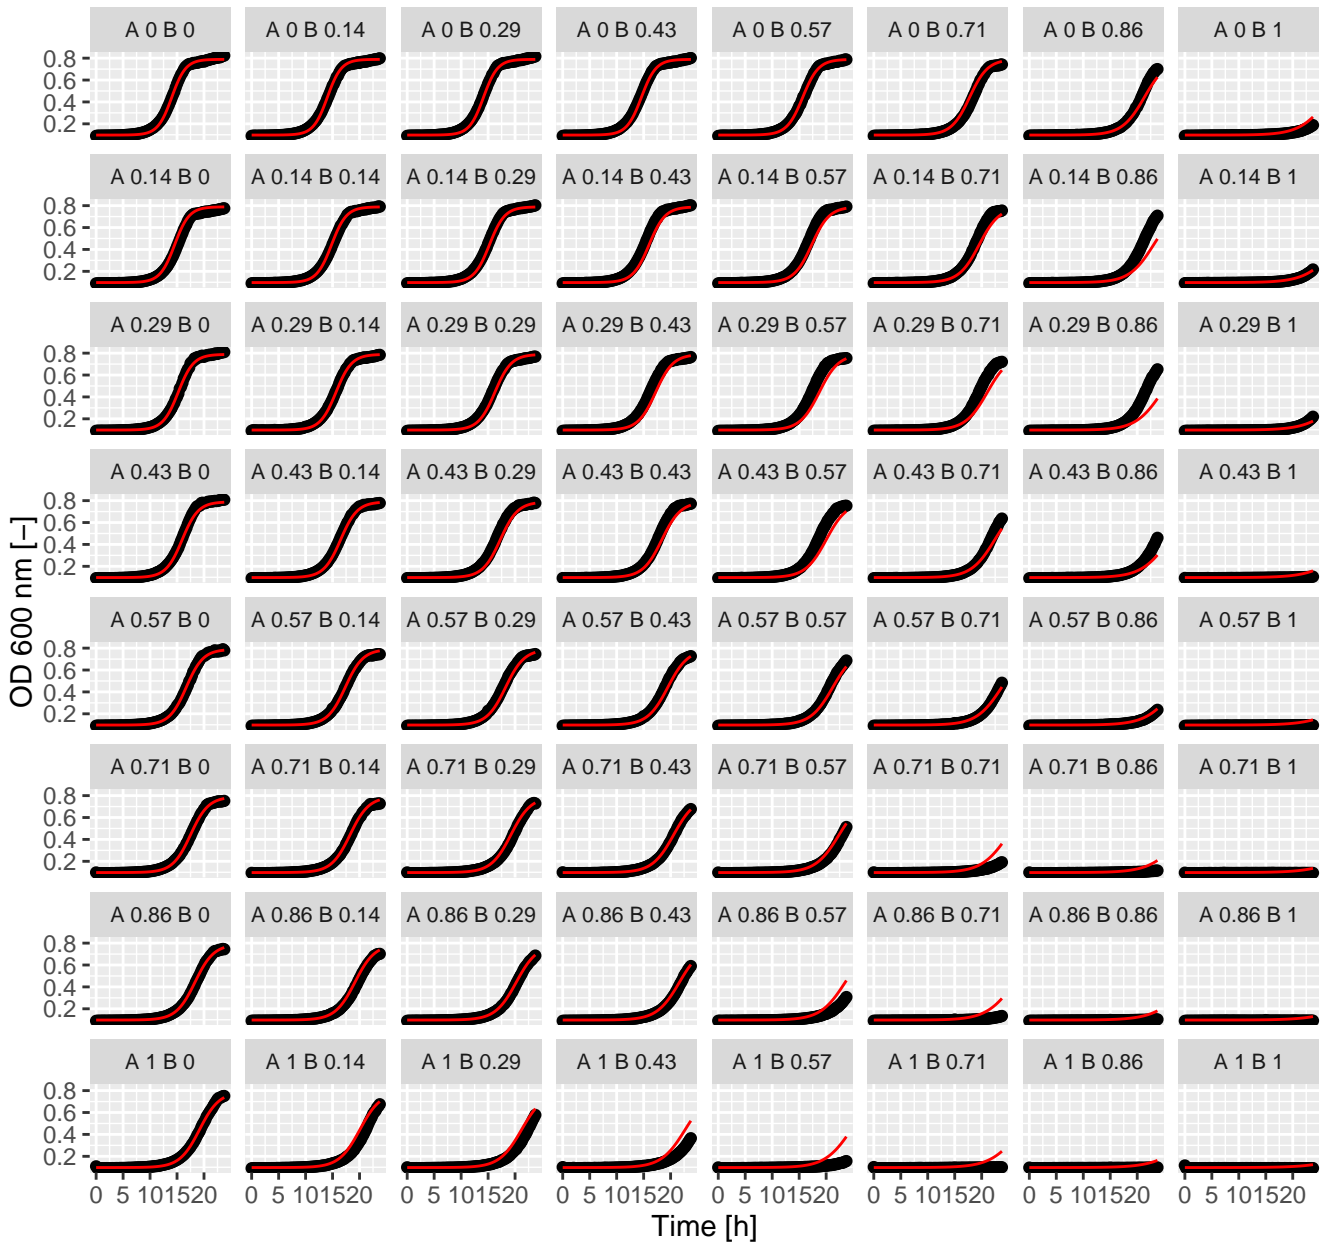



Hyg.Rap (= Ax.Bx) Greco  
 $\alpha = -0.63$

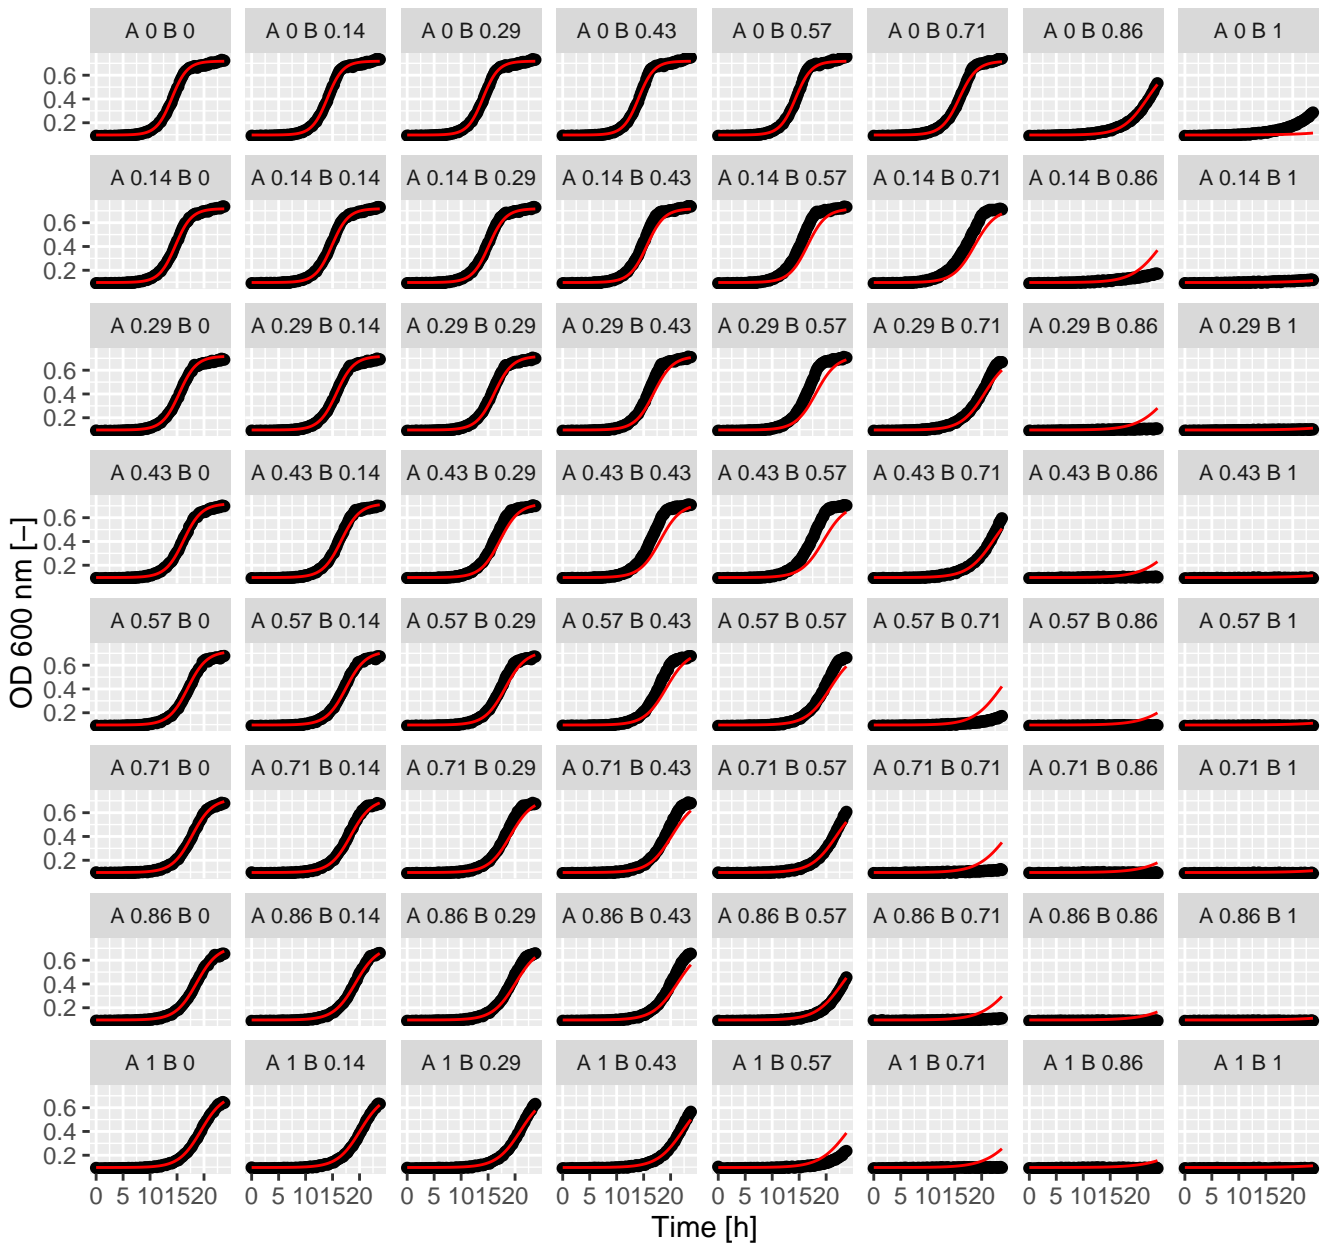

Hyg.Rad (= Ax.Bx) Greco  
 $\alpha = -0.31$

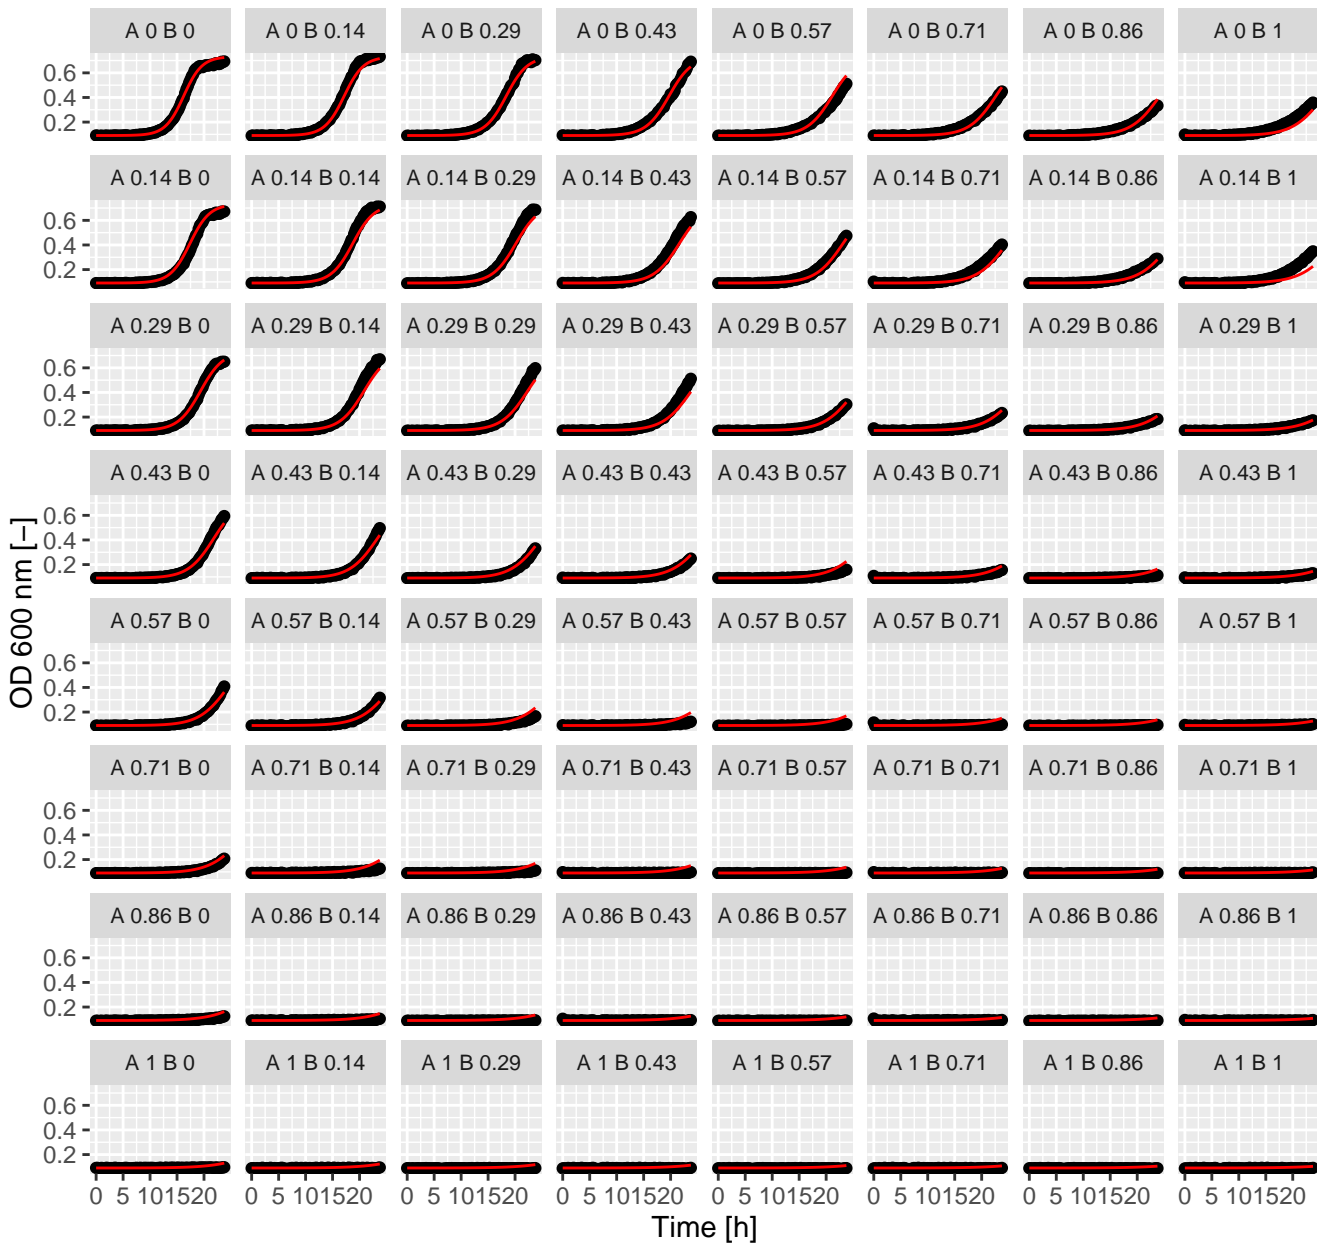

Hyg.Myr (= Ax.Bx) Greco  
alpha = 2.6

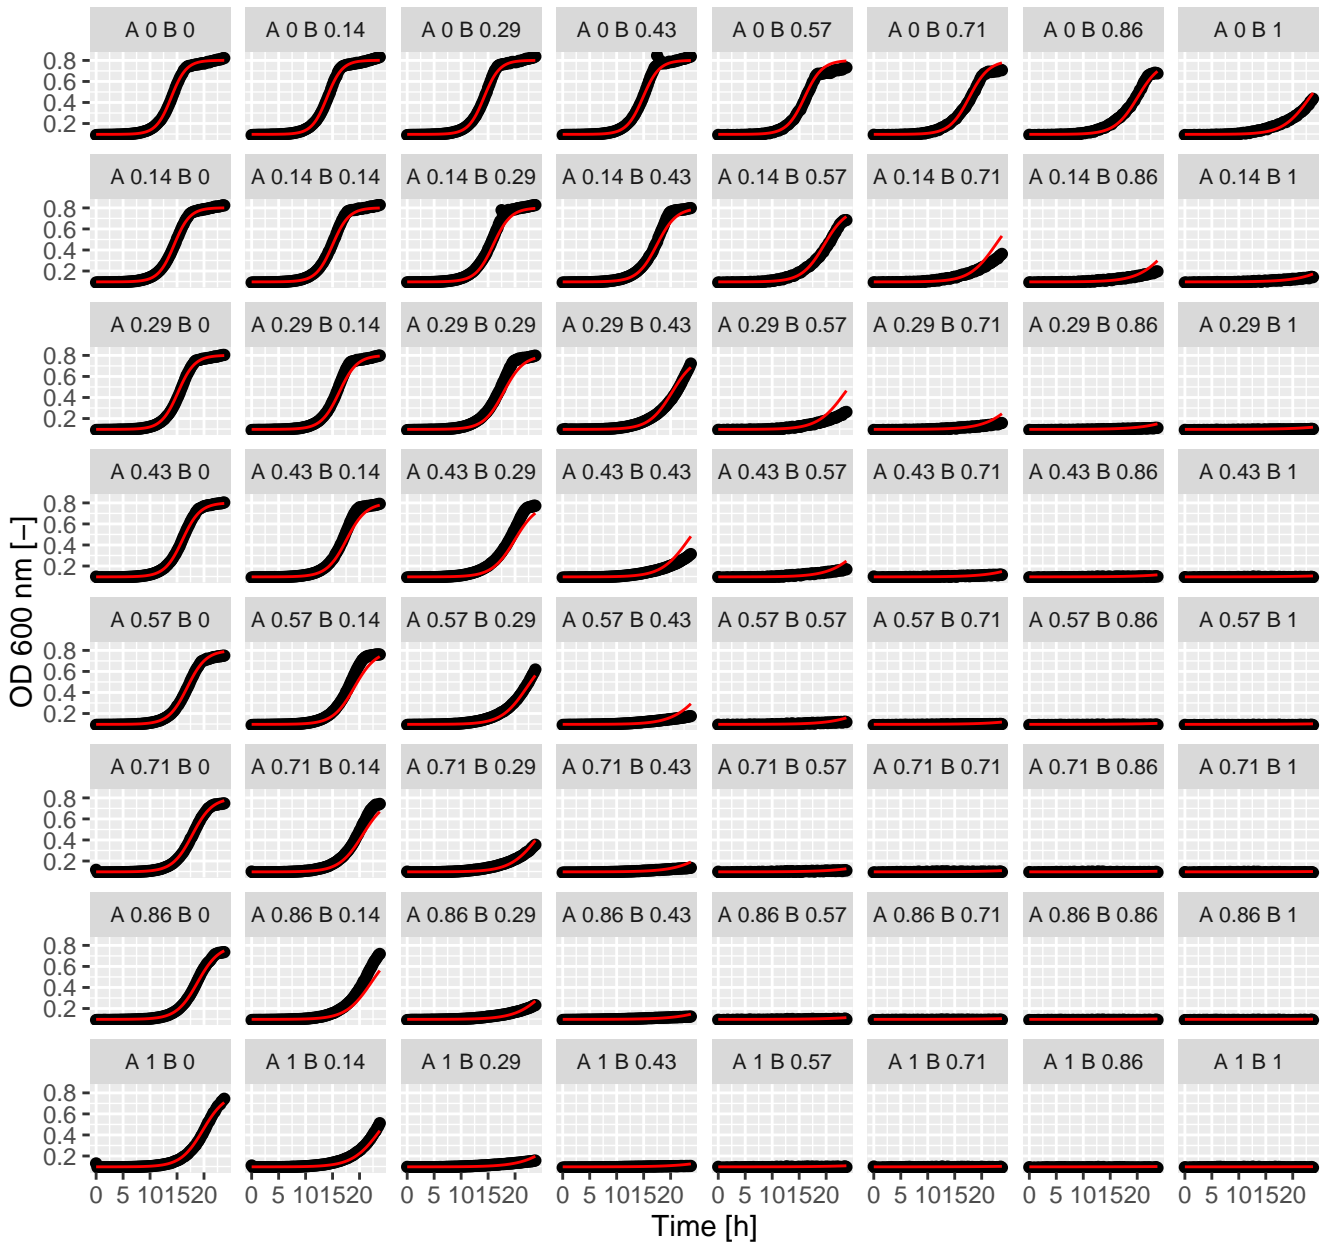

Hyg.Lat (= Ax.Bx) Greco  
 $\alpha = -0.98$

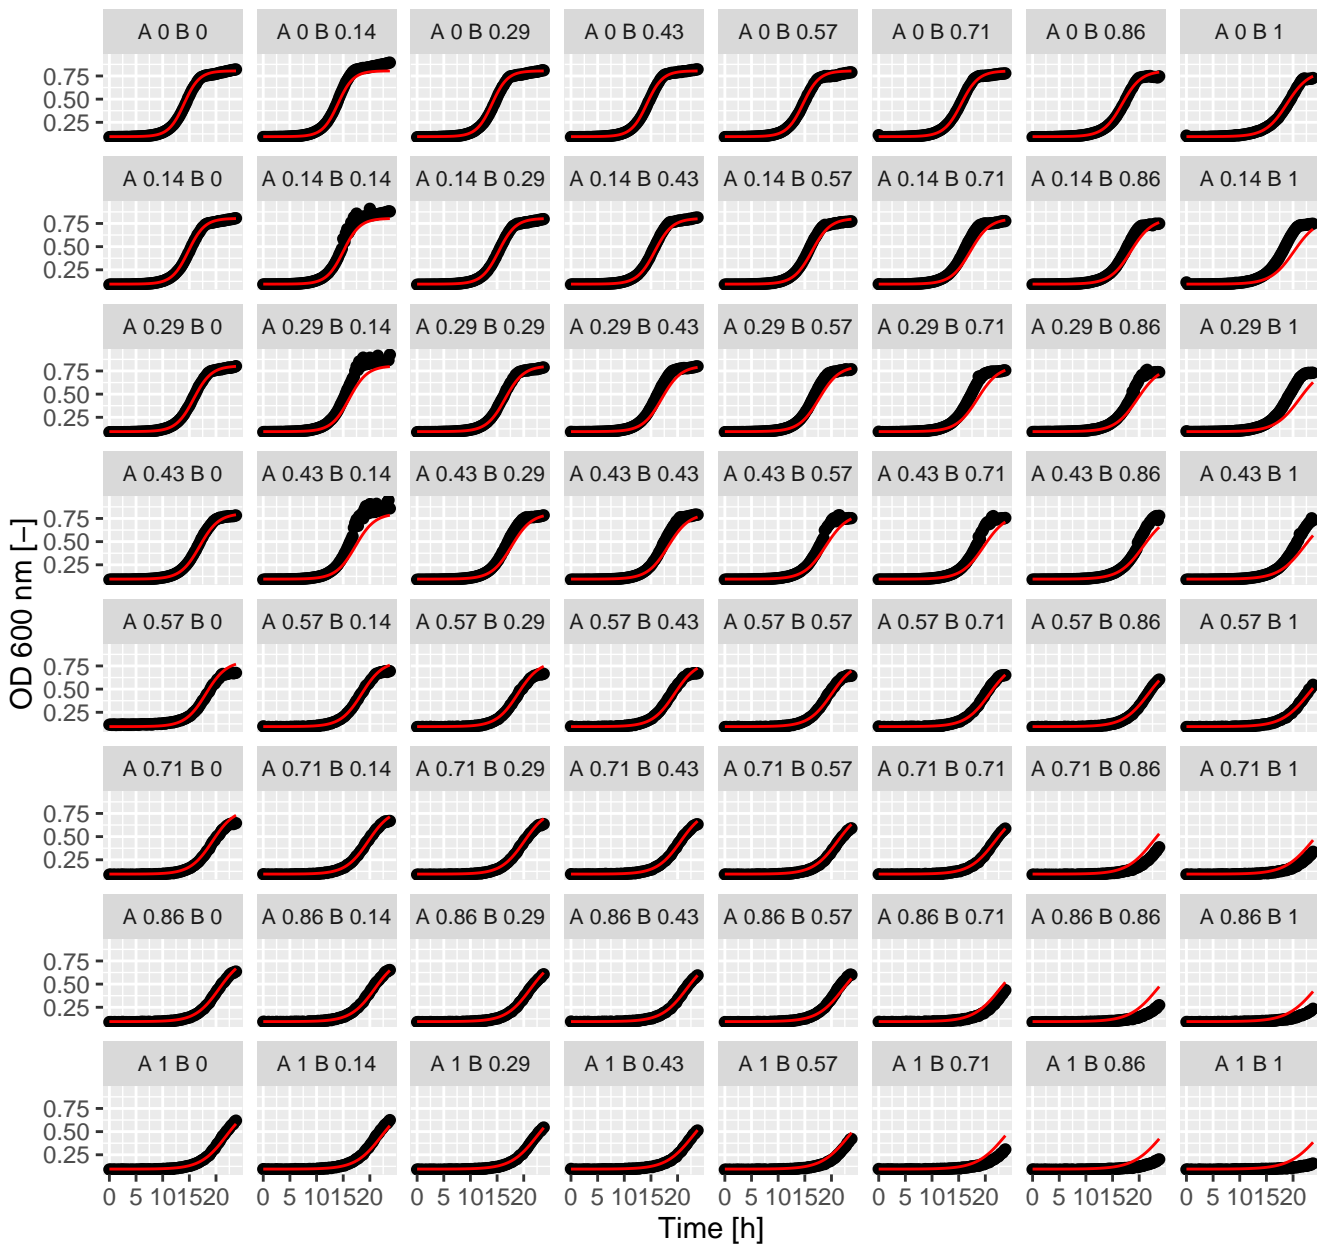

Hal.Tun (= Ax.Bx) Greco  
alpha = -1.02

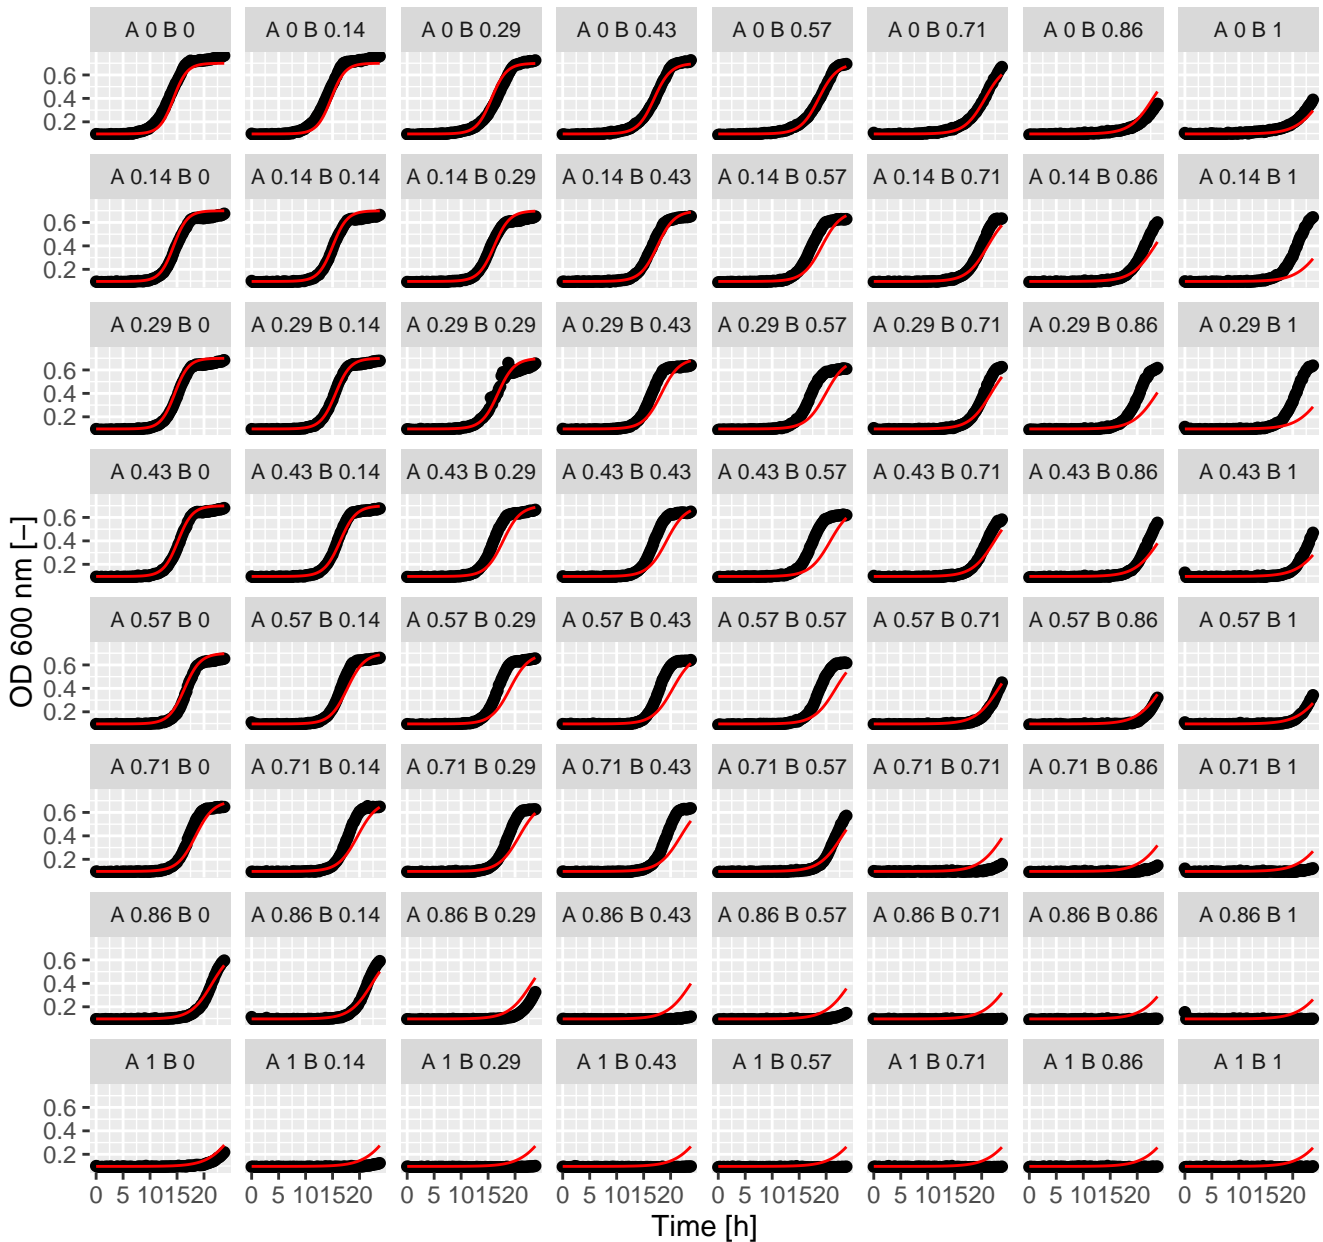

# Hal.Ter (= Ax.Bx) Greco alpha = 1.57

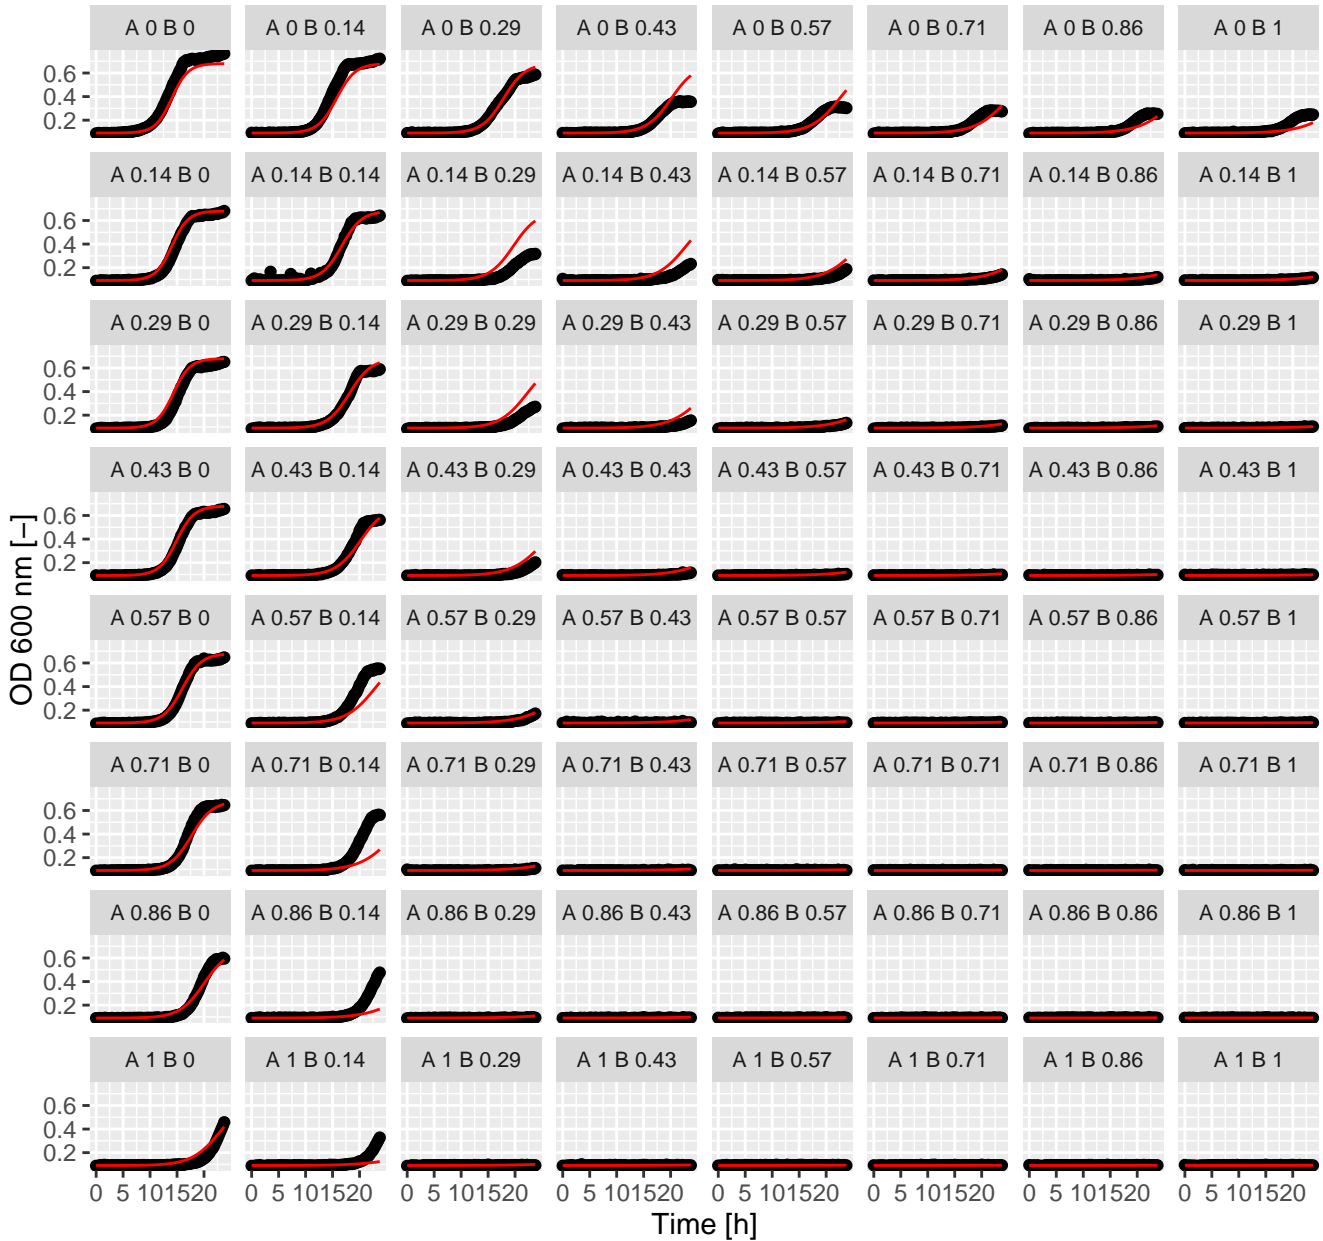

# Hal.Tac (= Ax.Bx) Greco

alpha = 4.73

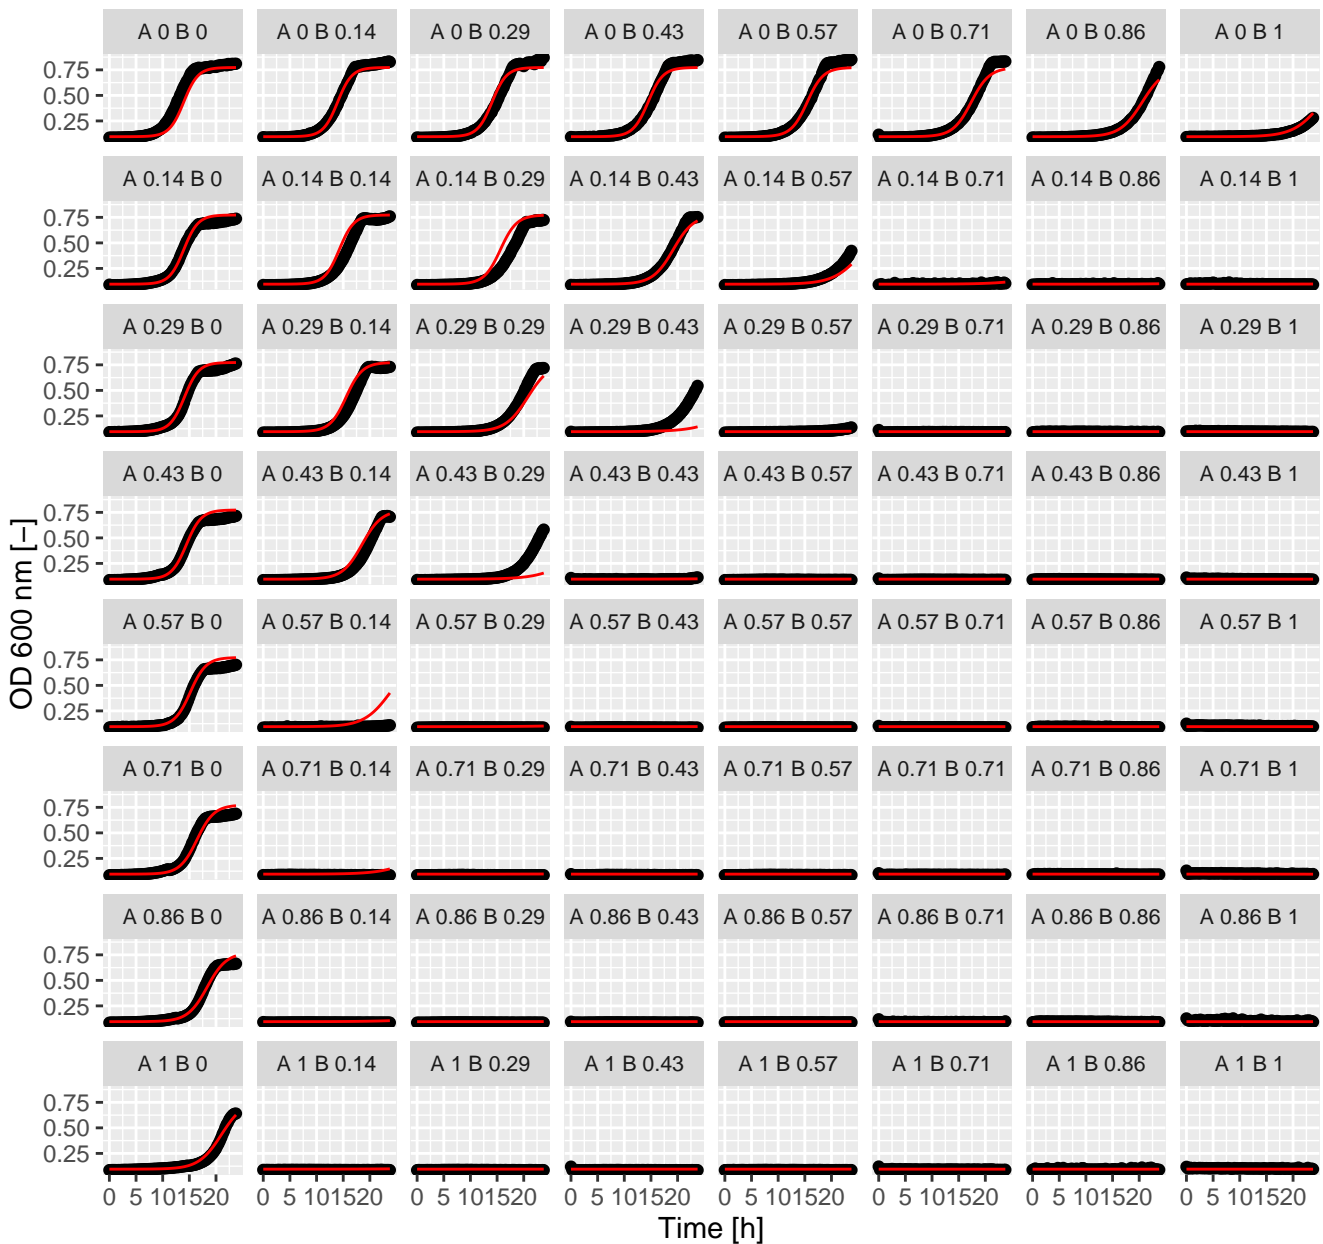

# Hal.Sta (= Ax.Bx) Greco alpha = 7.45

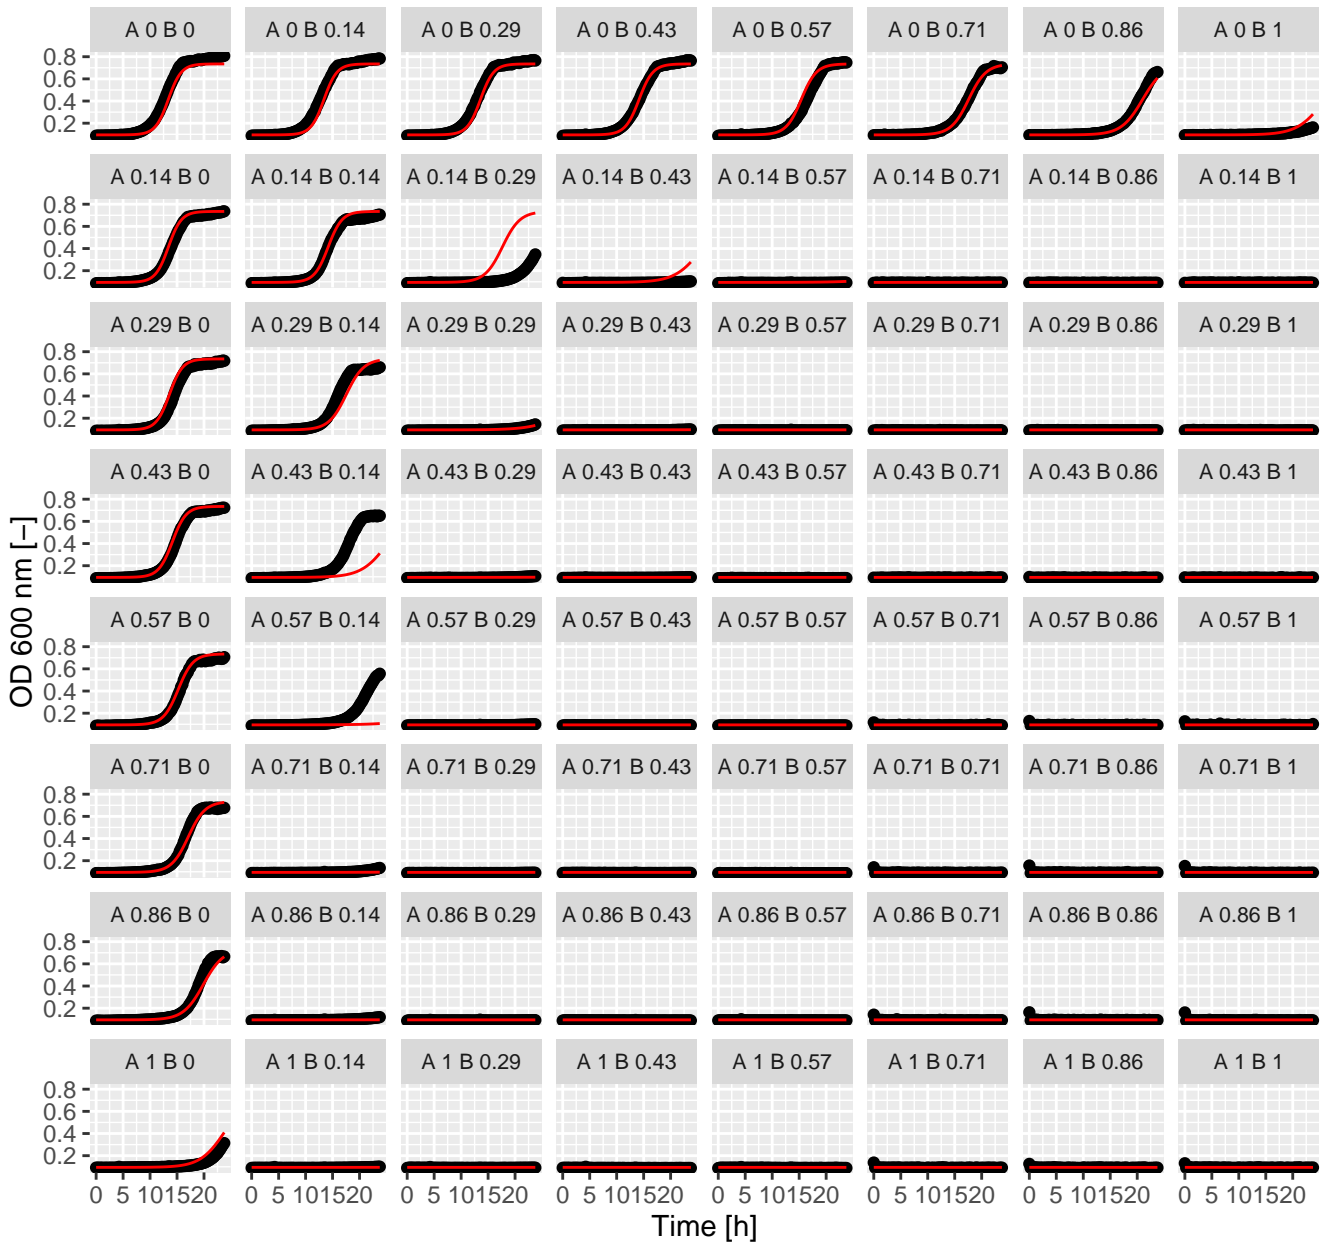



# Hal.Rap (= Ax.Bx) Greco alpha = 2.37

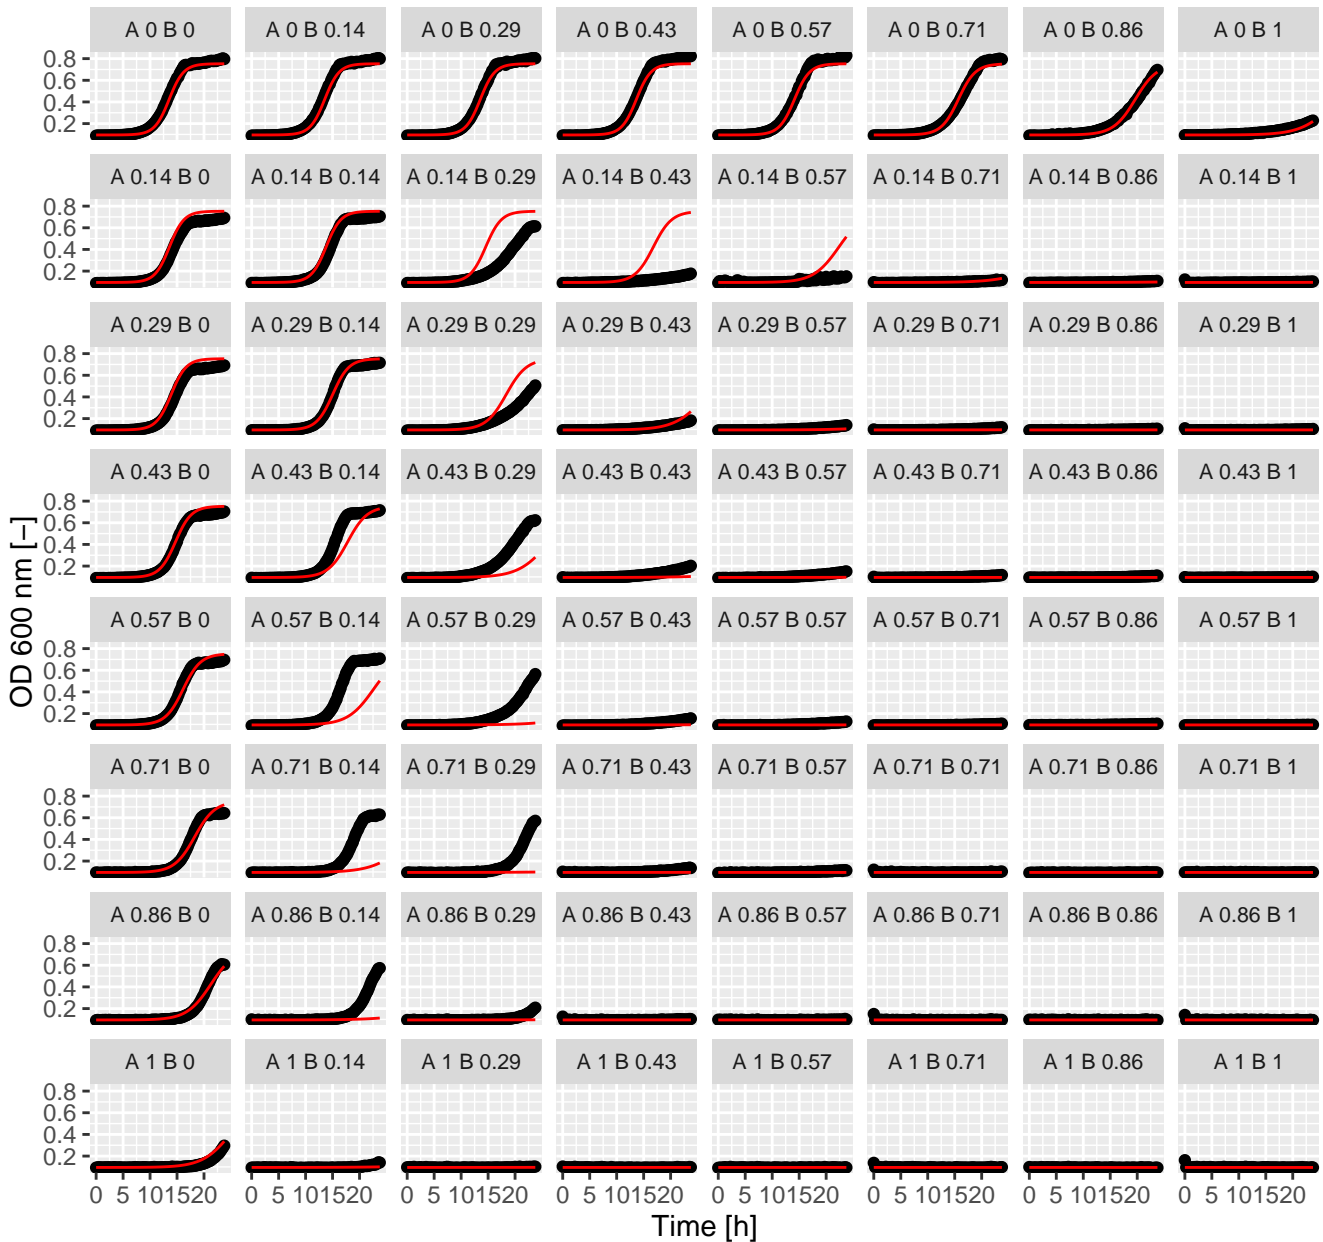

# Hal.Pen (= Ax.Bx) Greco

alpha = 5.38

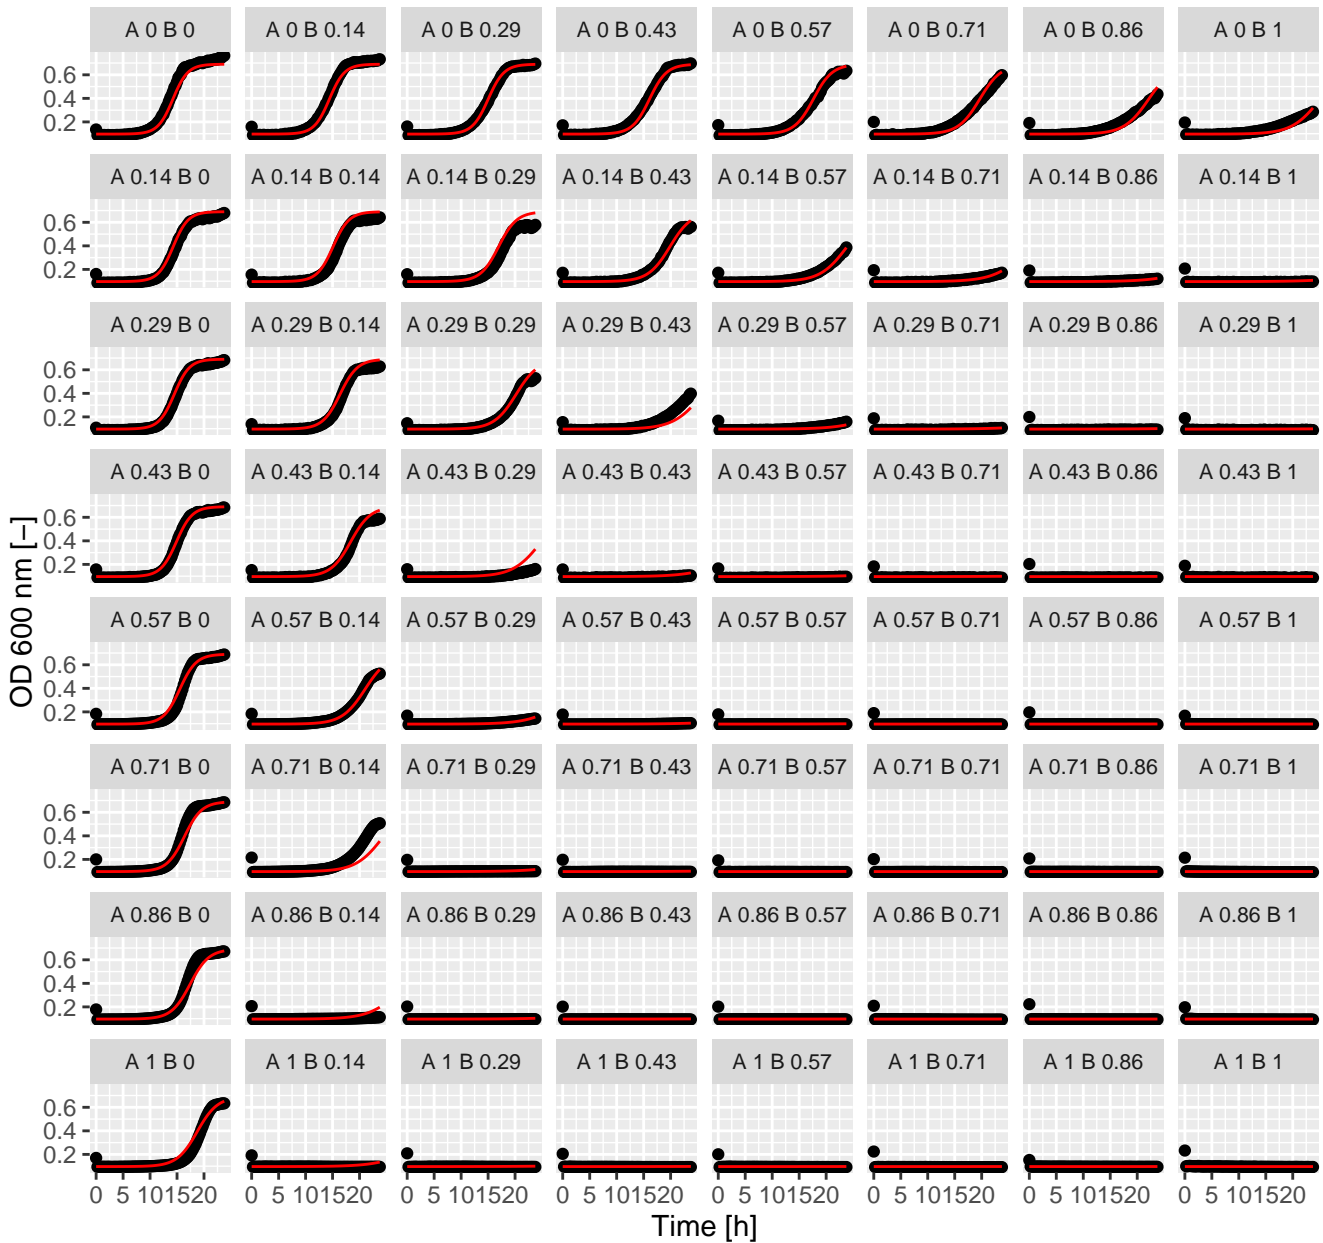

# Hal.Lat (= Ax.Bx) Greco alpha = 7.31

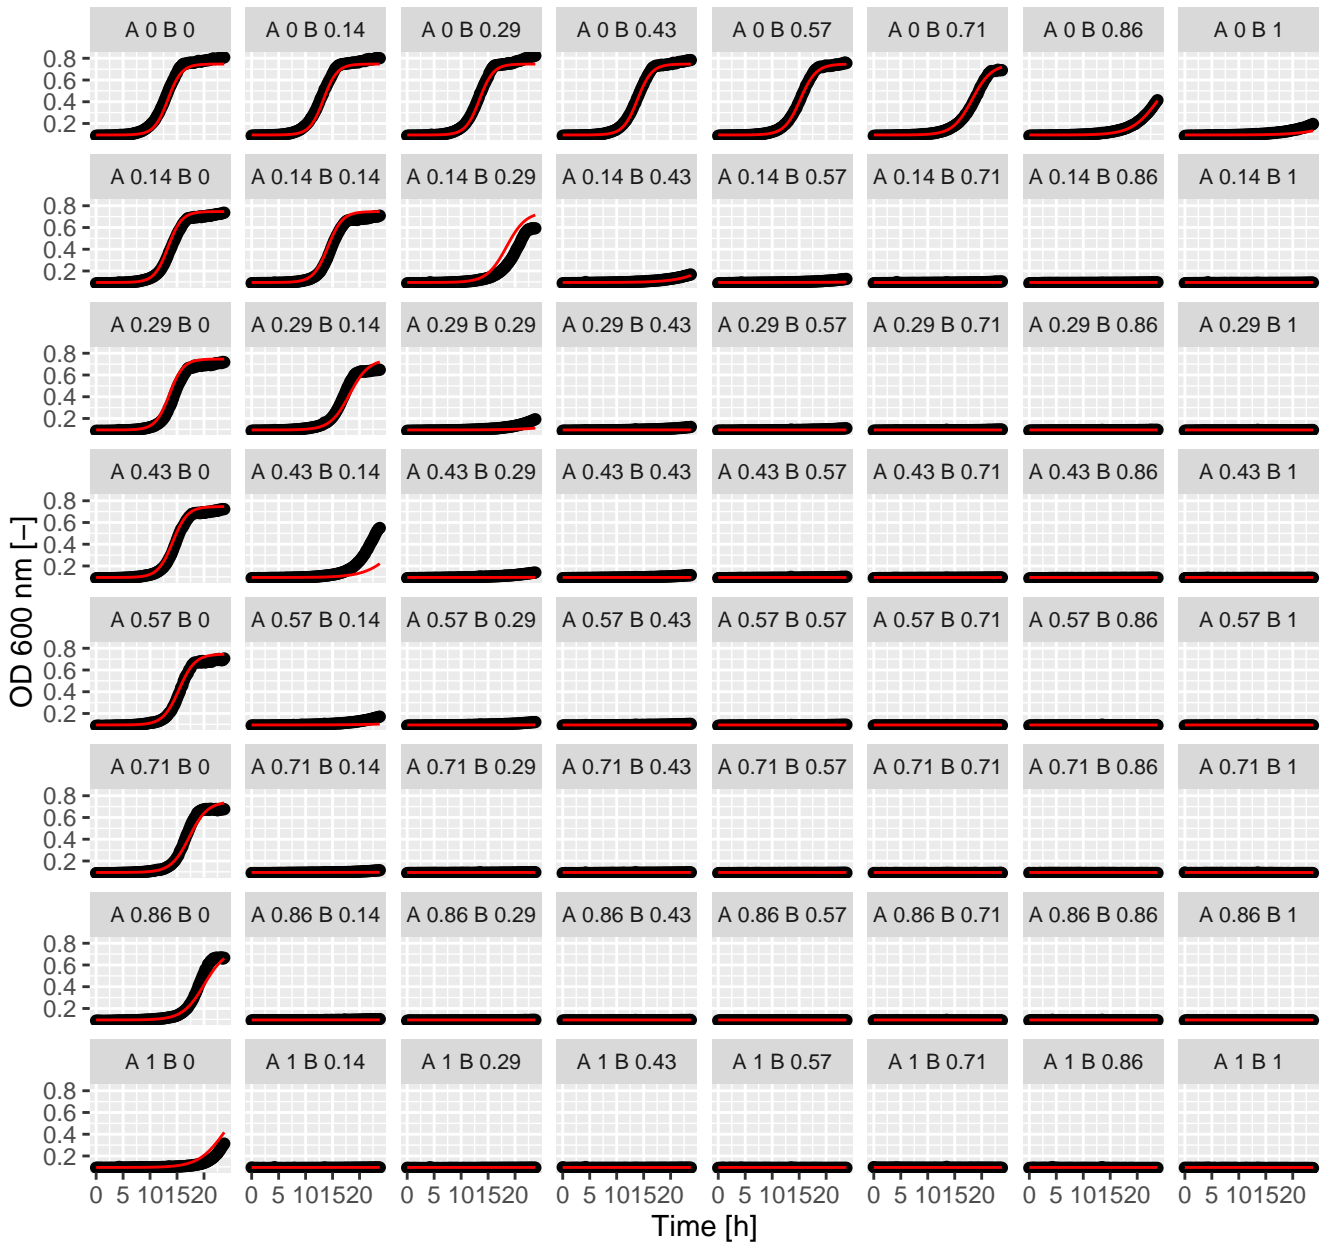

Hal.Hal (= Ax.Bx) Greco  
alpha = 0.36

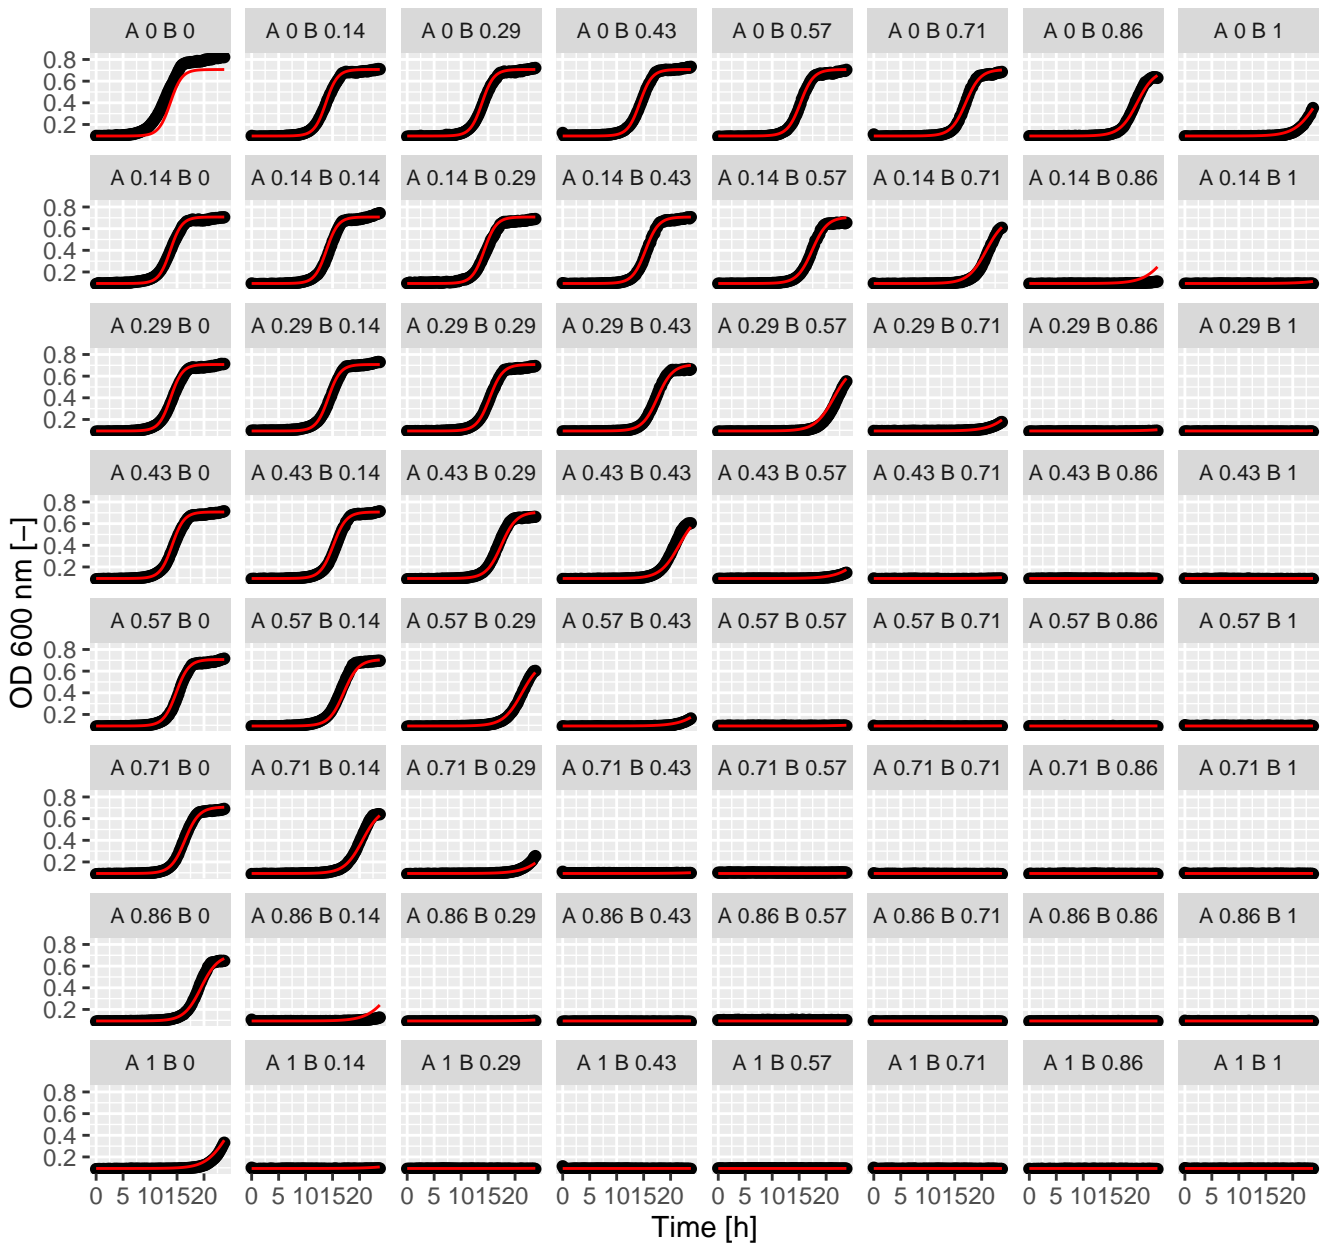

Fen.Tun (= Ax.Bx) Greco  
 $\alpha = -0.96$

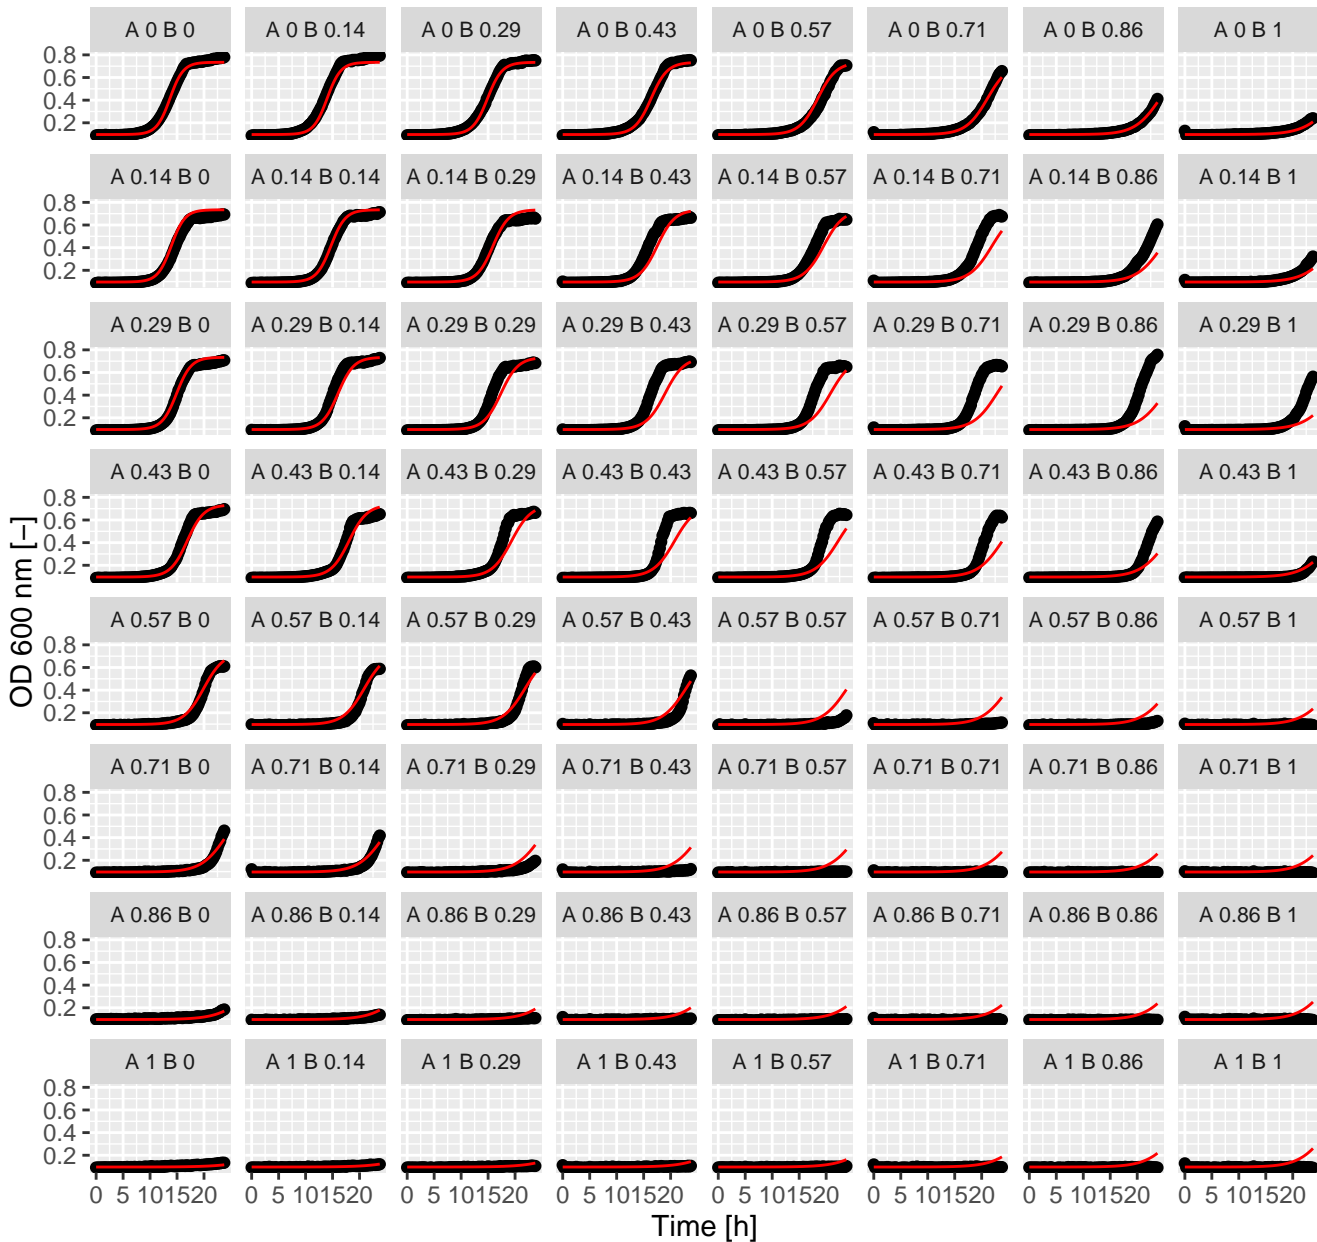

Fen.Ter (= Ax.Bx) Greco  
alpha = 2.13

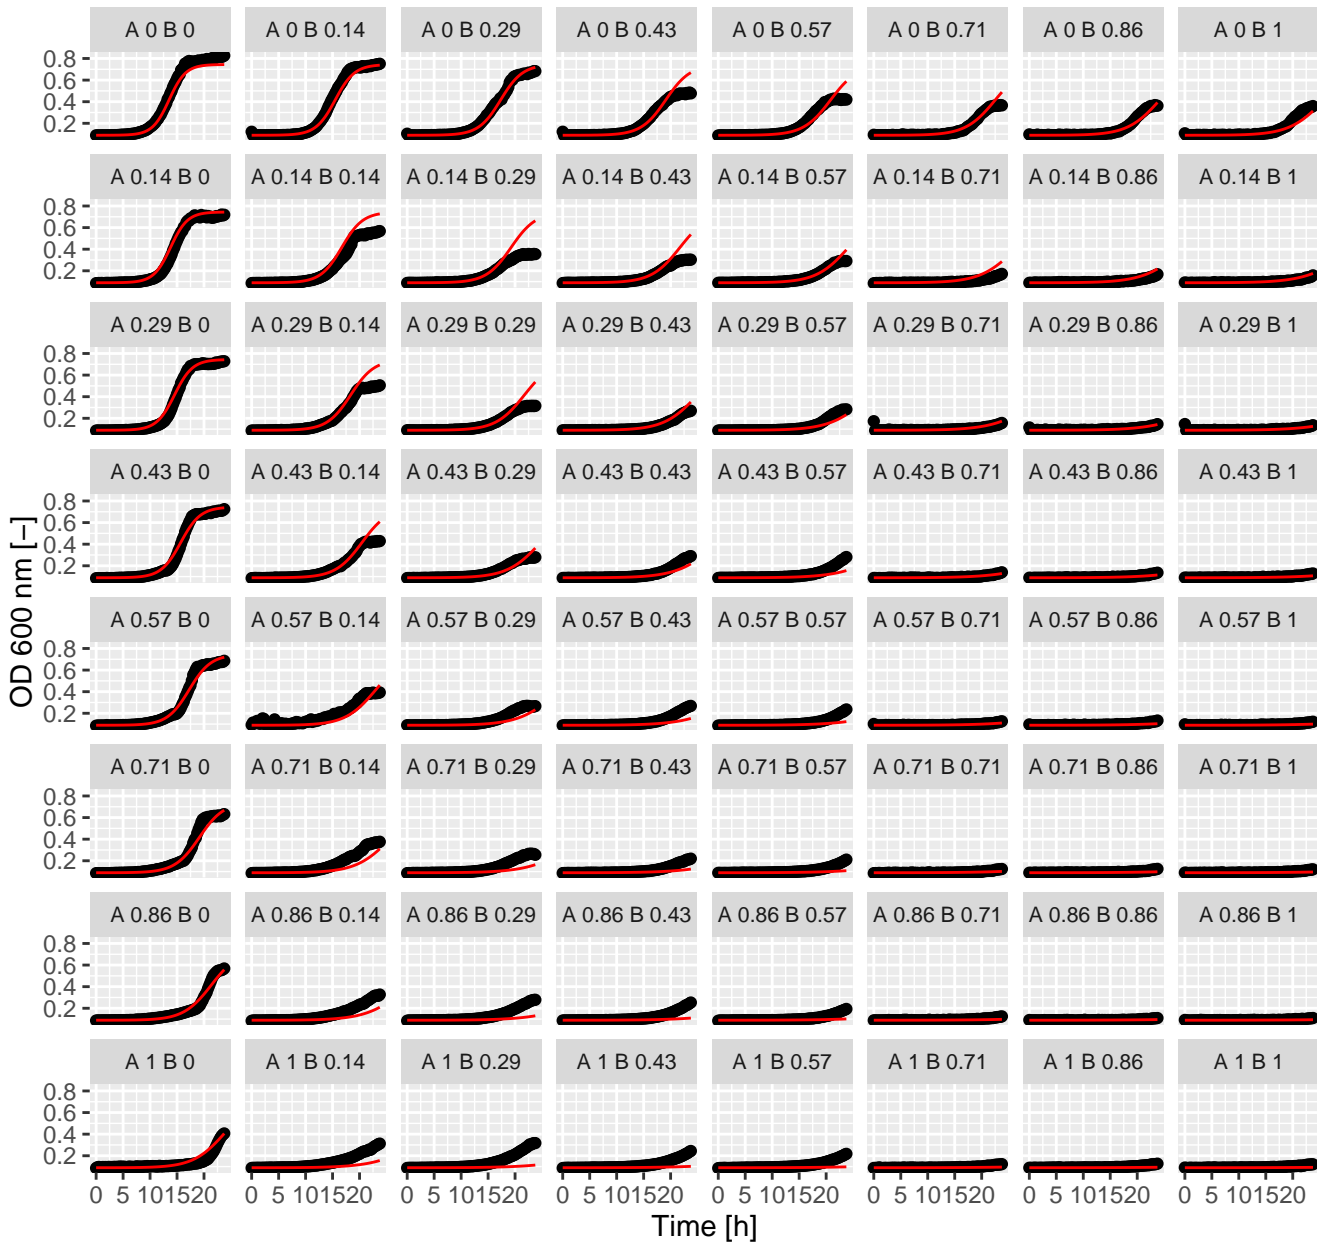

Fen.Tac (= Ax.Bx) Greco  
alpha = 1.42

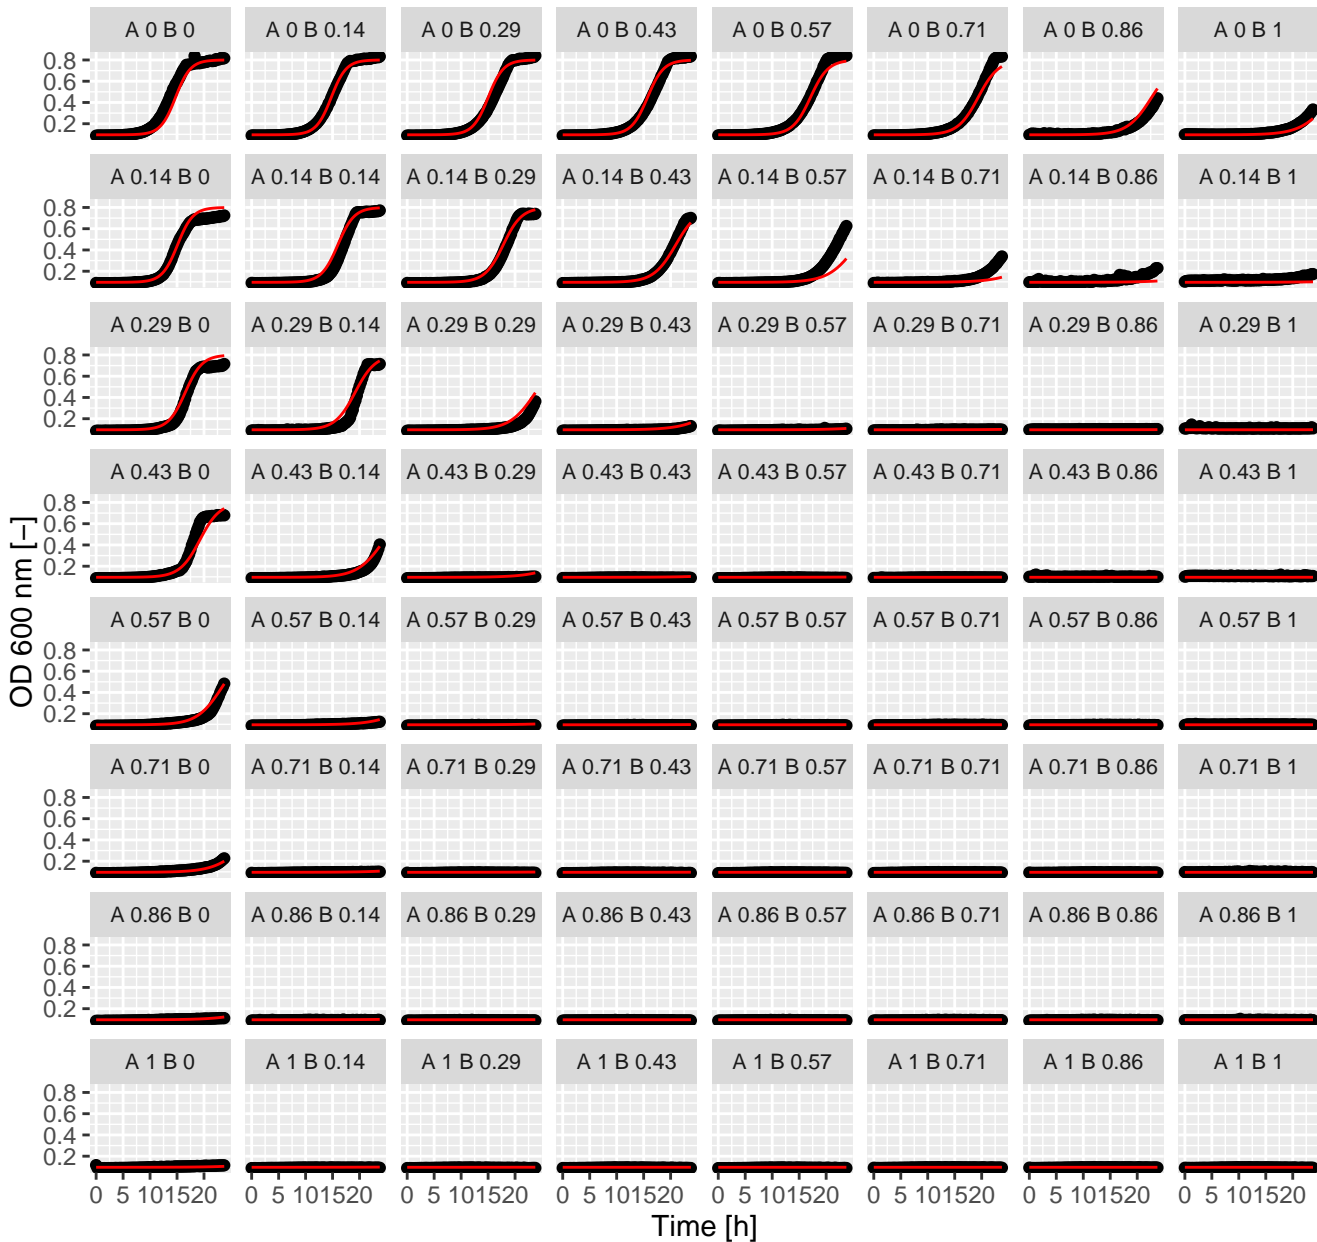

Fen.Sta (= Ax.Bx) Greco  
alpha = 2.21

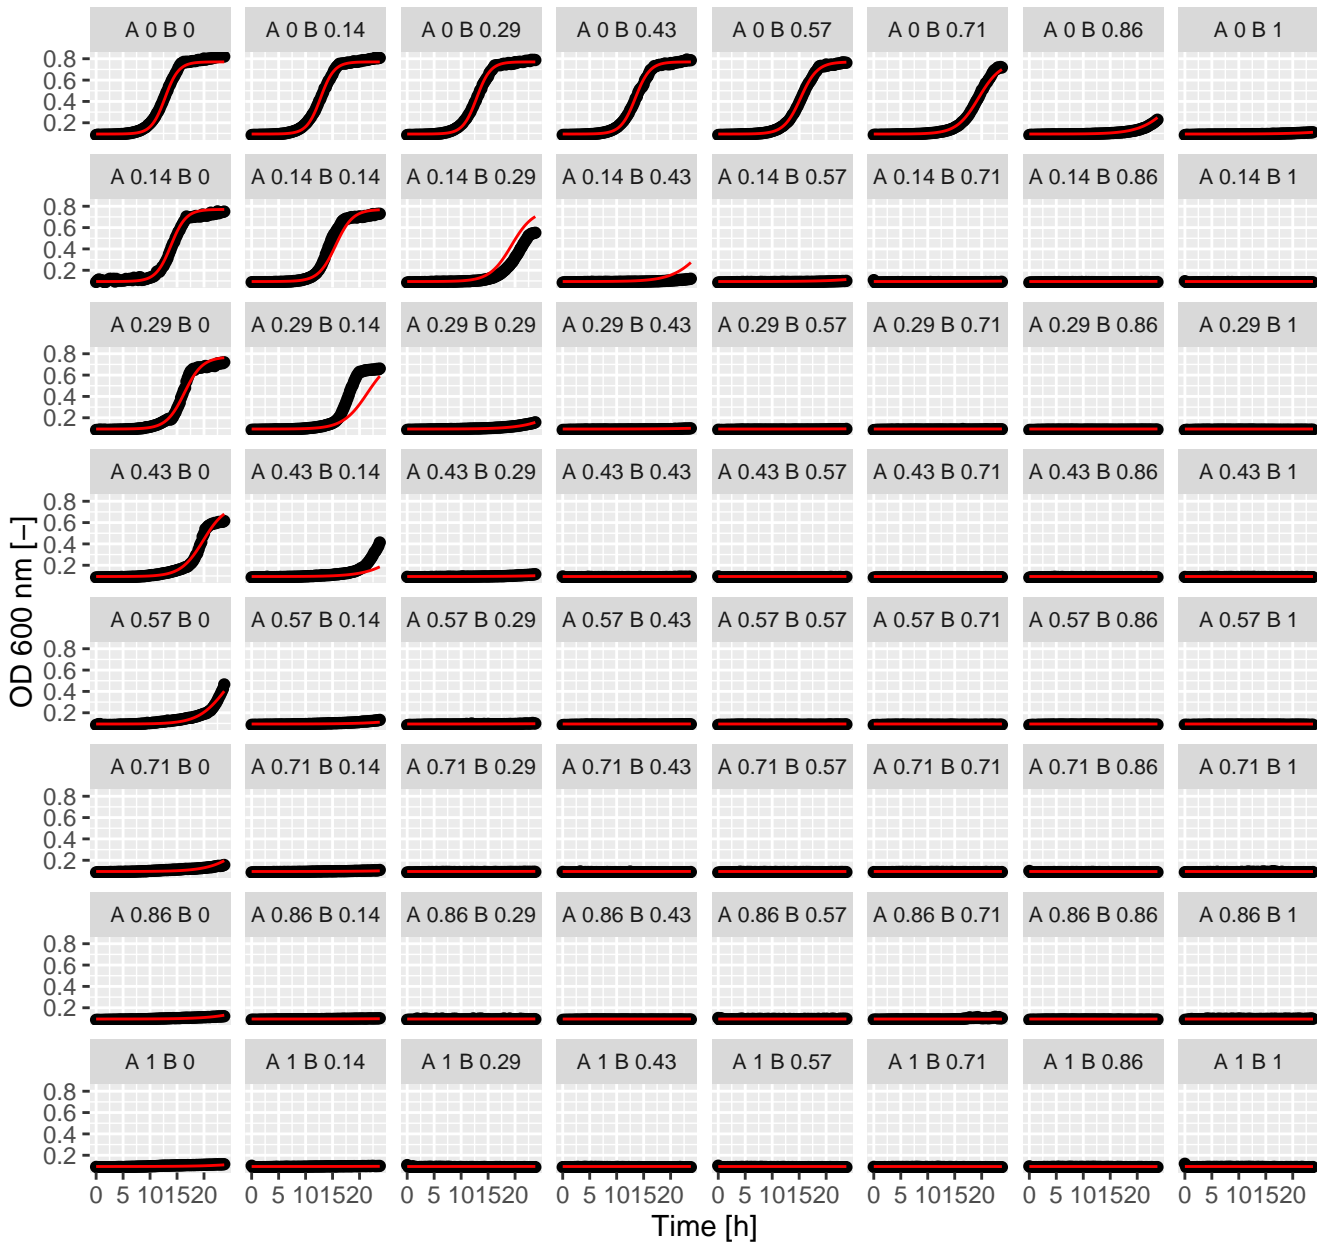



# Fen.Rap (= Ax.Bx) Greco

alpha = 1.03

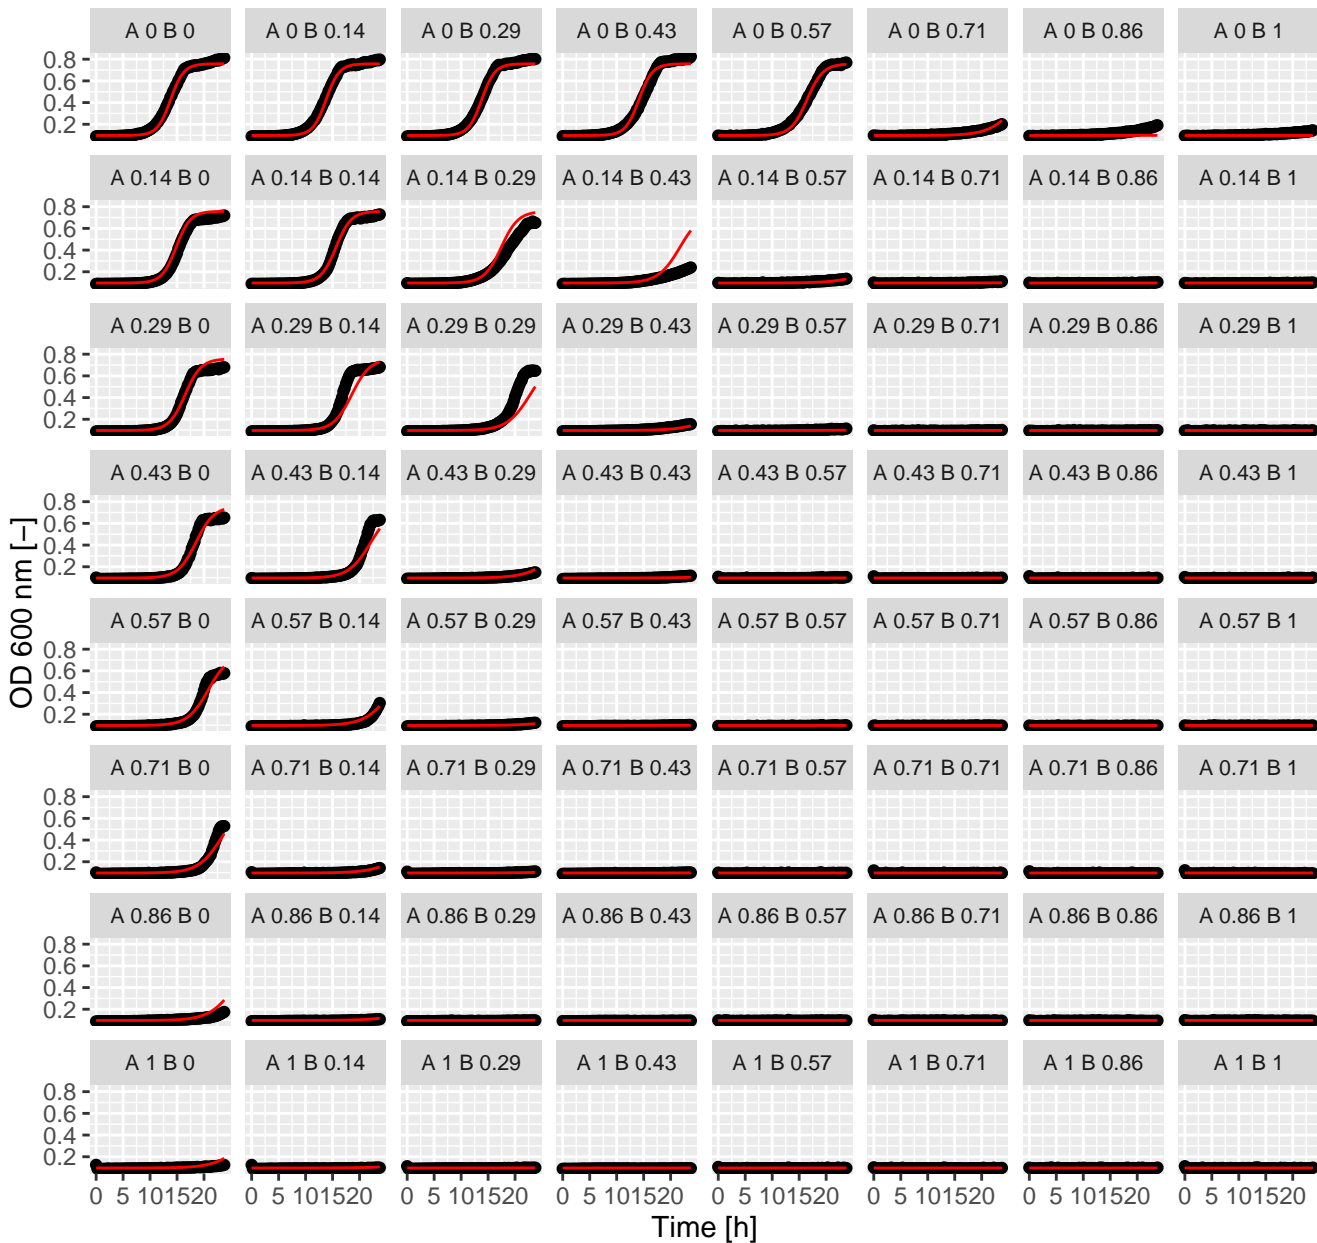

# Fen.Pen (= Ax.Bx) Greco alpha = 5.09

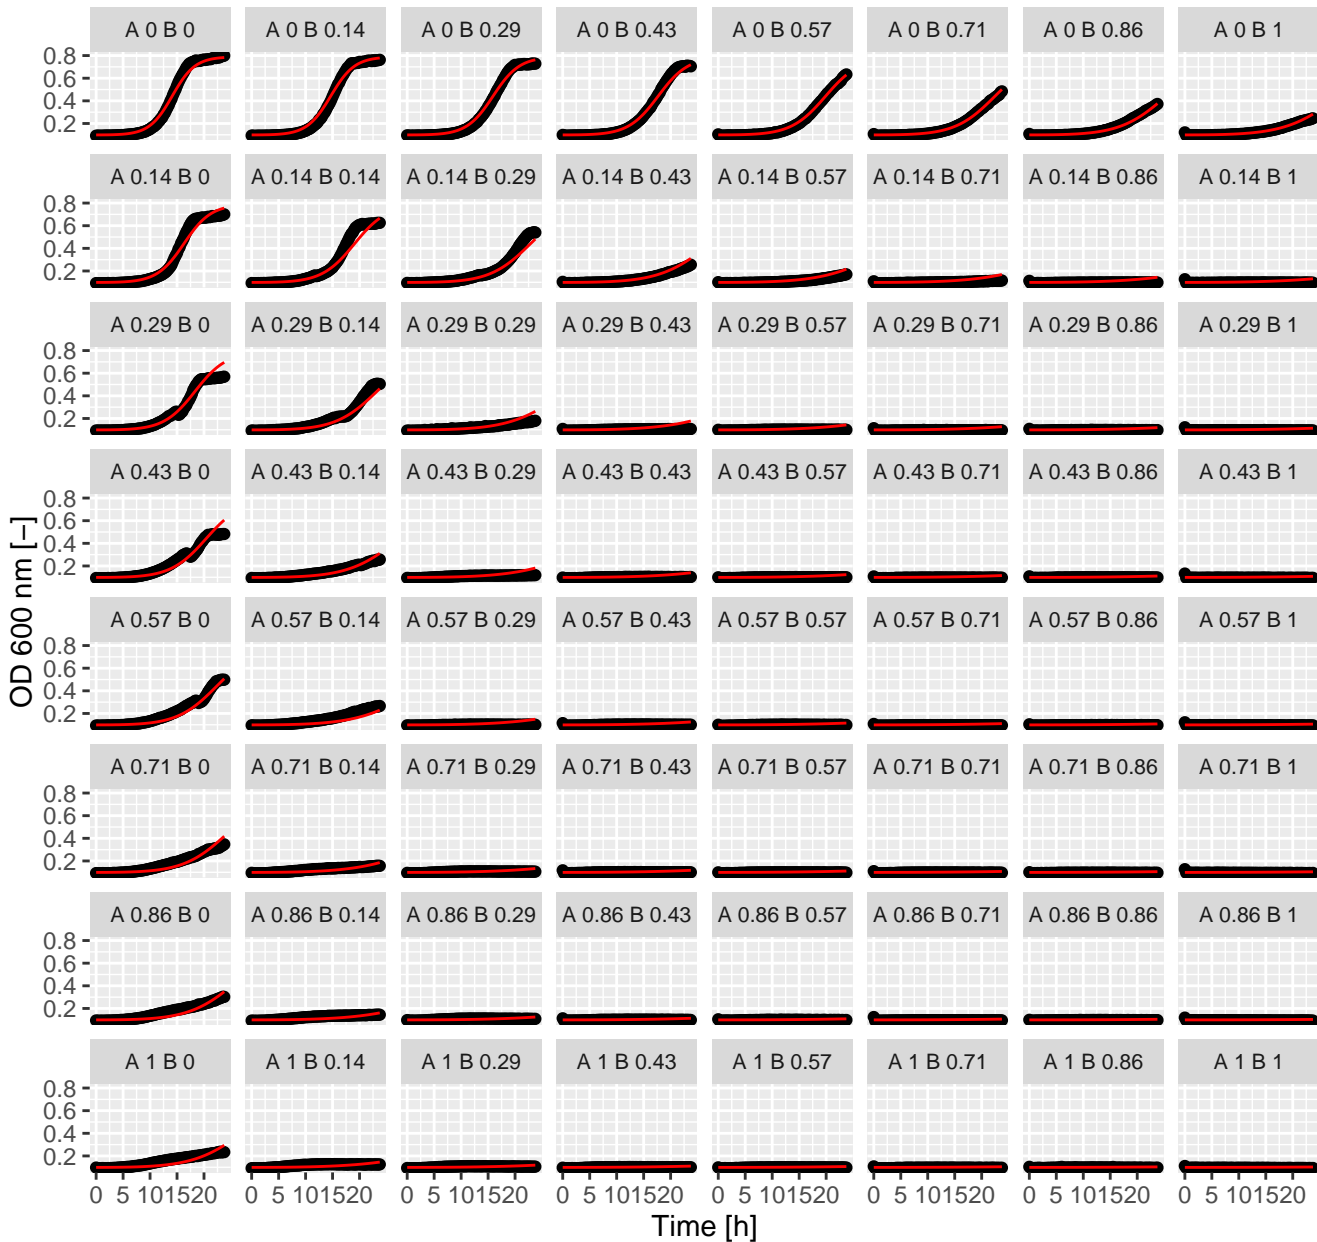

Fen.Lat (= Ax.Bx) Greco  
 $\alpha = 11.56$

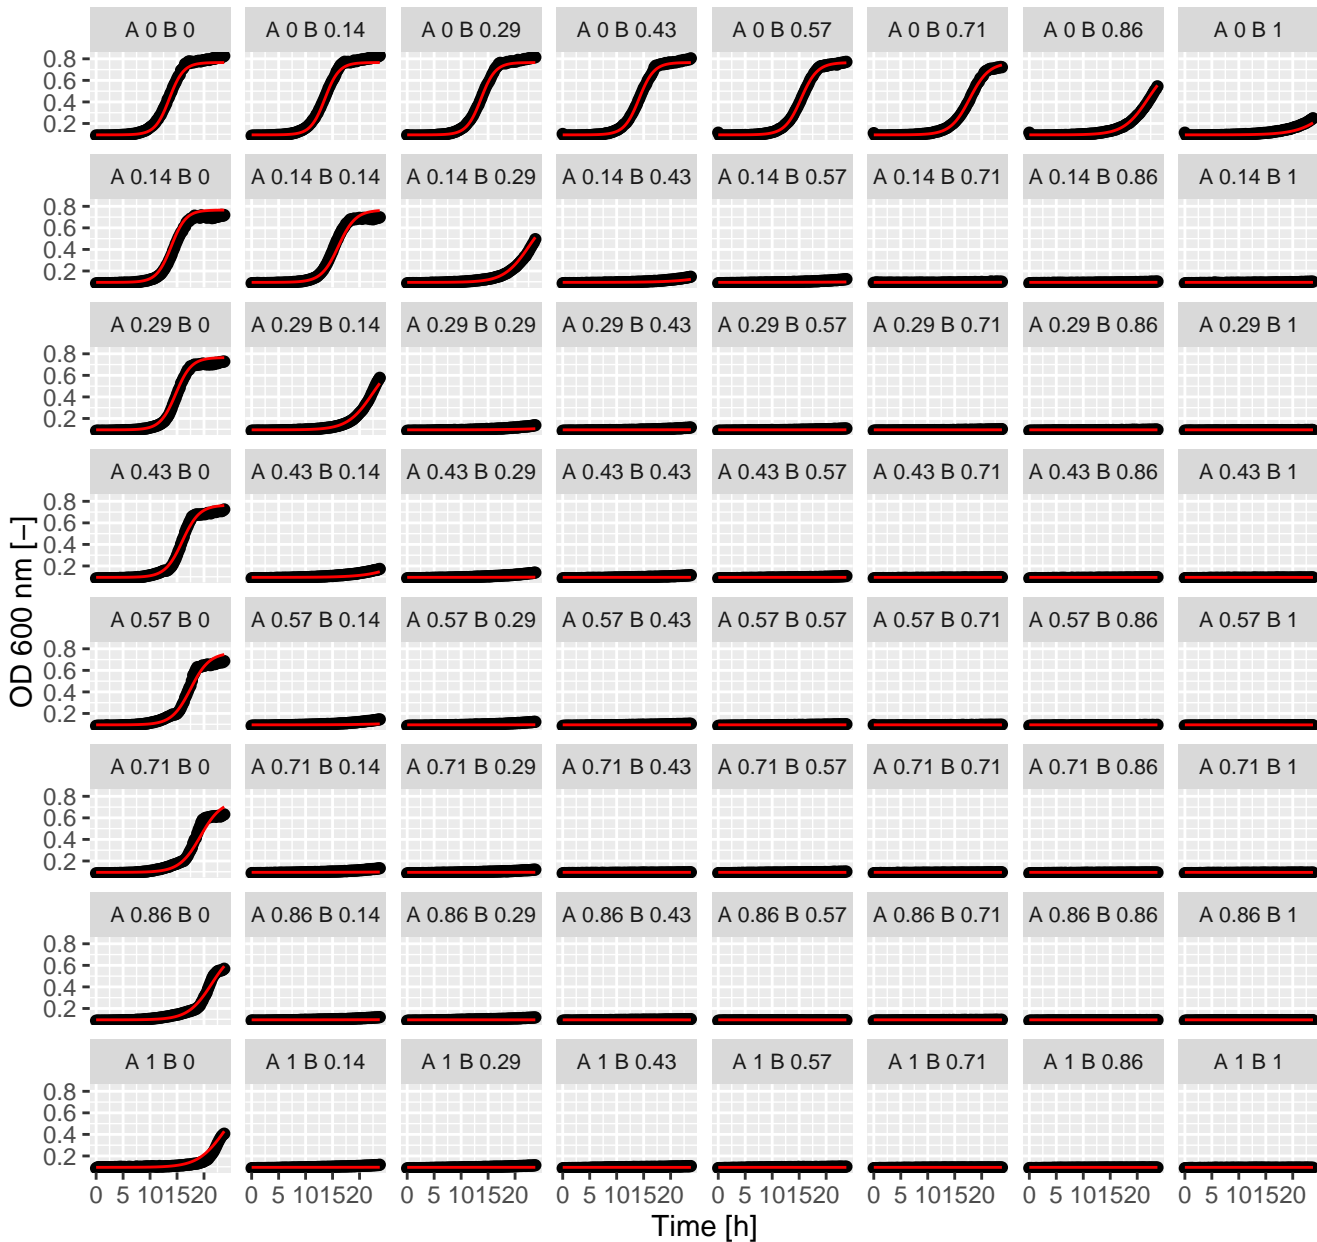

Fen.Hal (= Ax.Bx) Greco  
 $\alpha = -0.37$

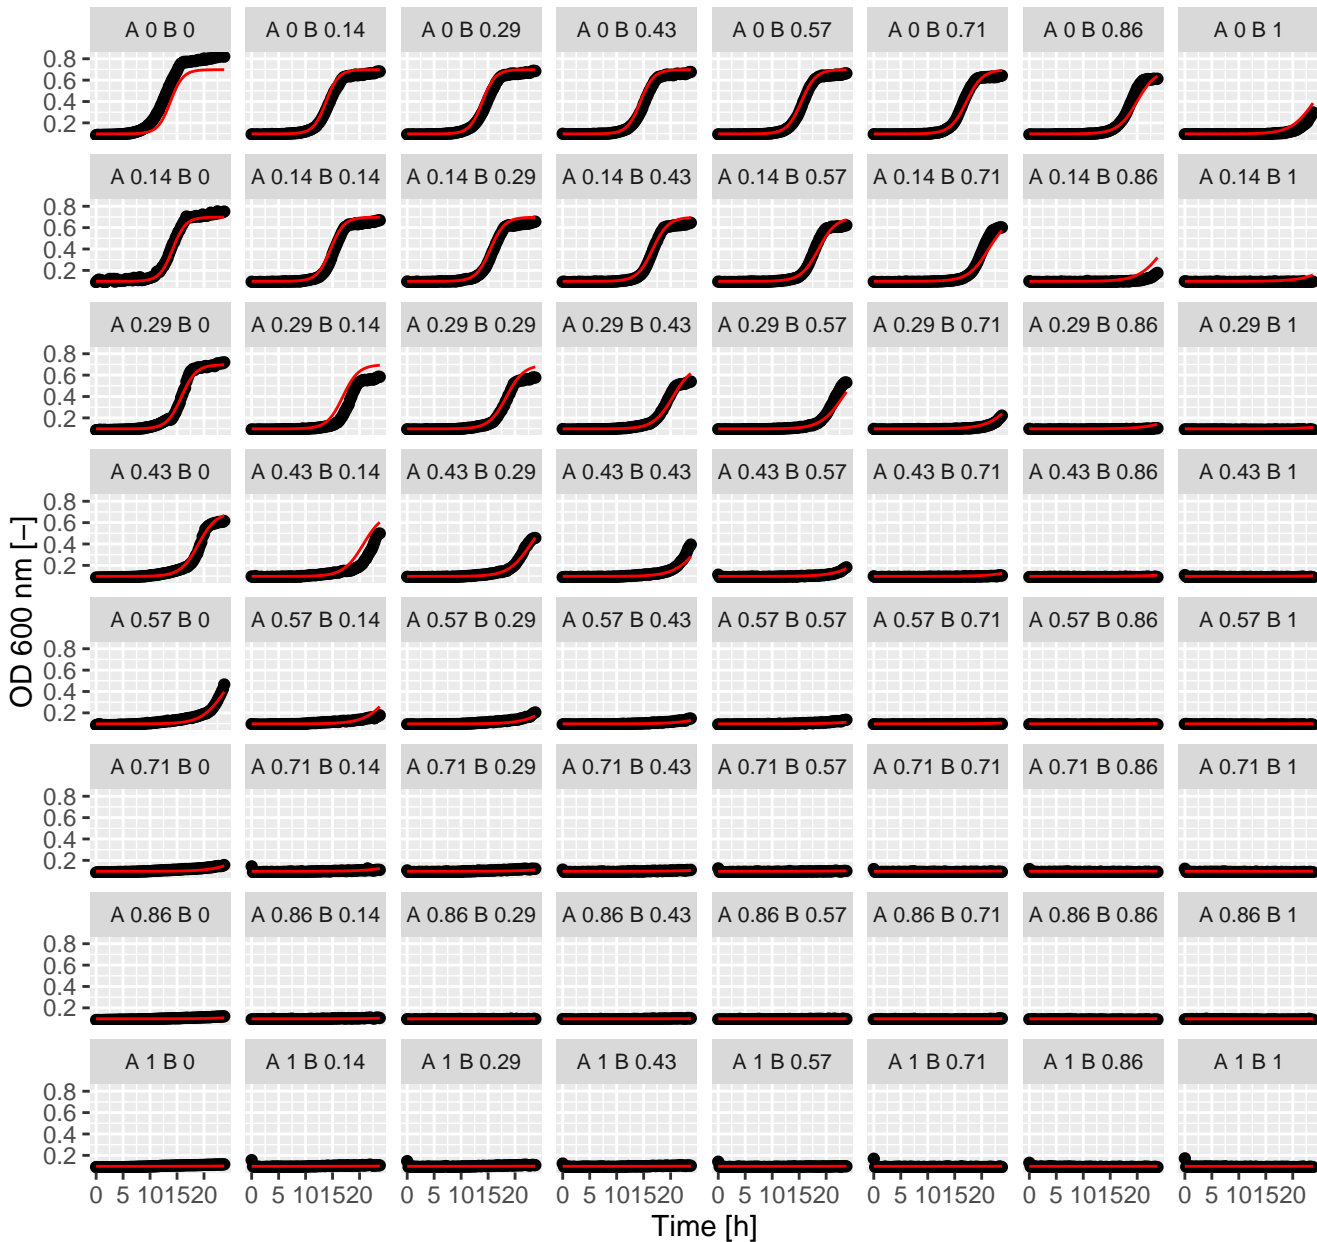

Fen.Fen (= Ax.Bx) Greco  
alpha = 0.27

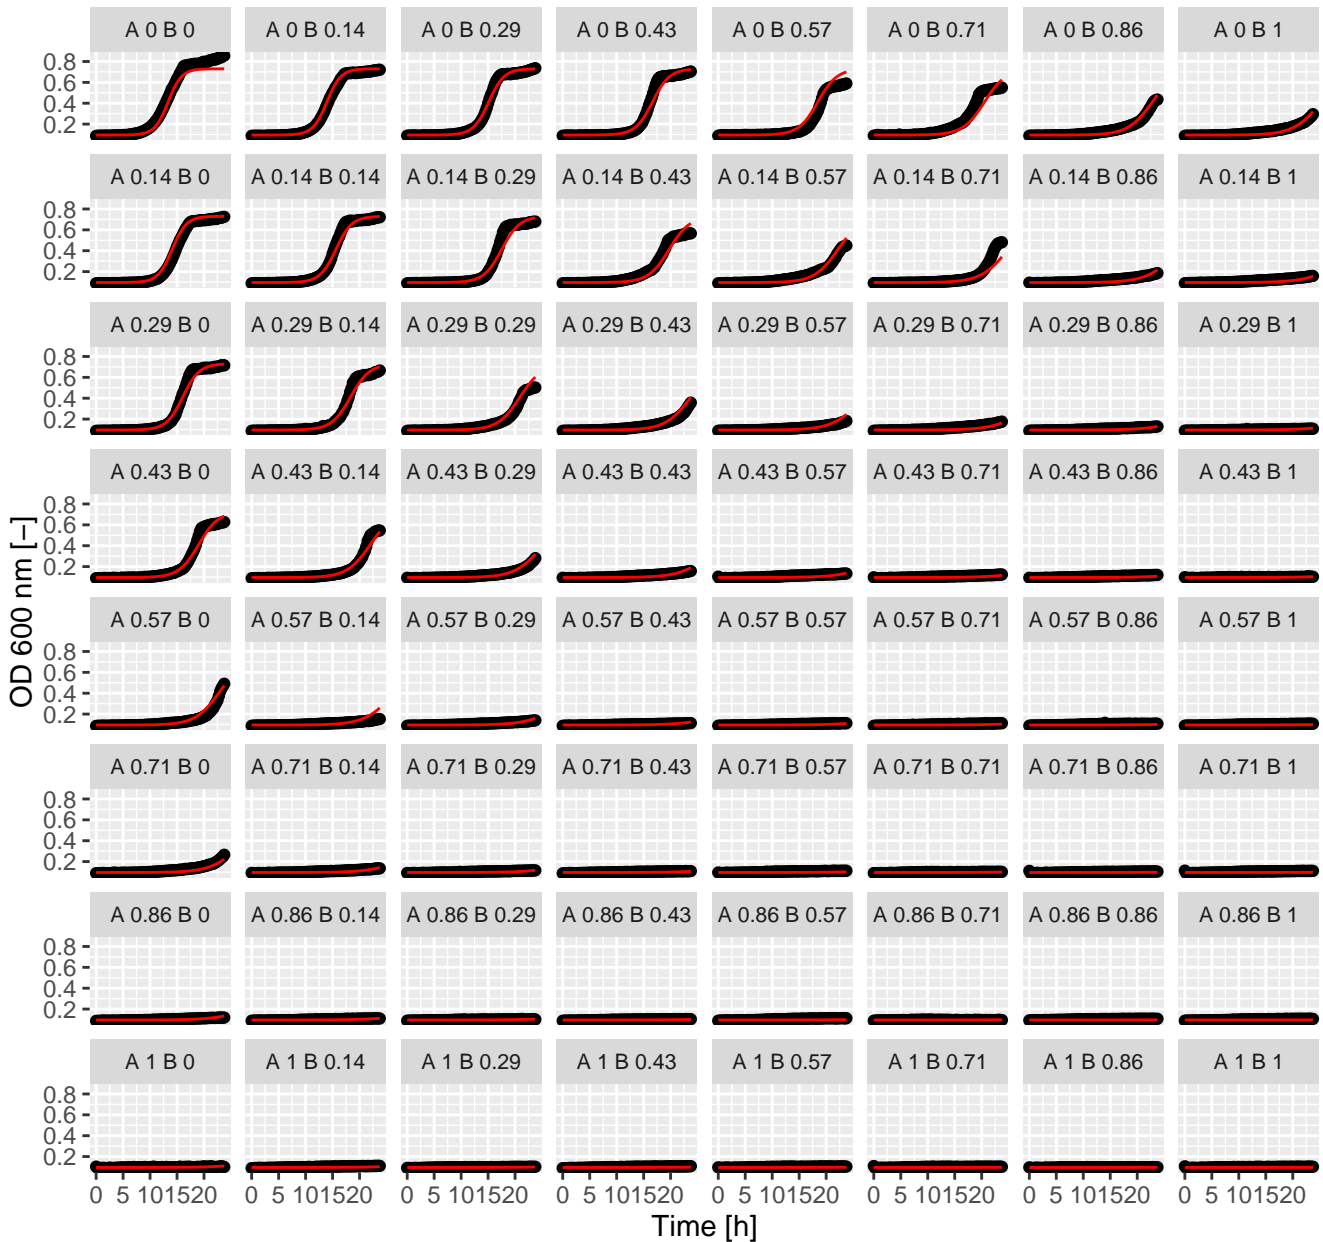

Dyc.Tun (= Ax.Bx) Greco  
 $\alpha = -0.71$

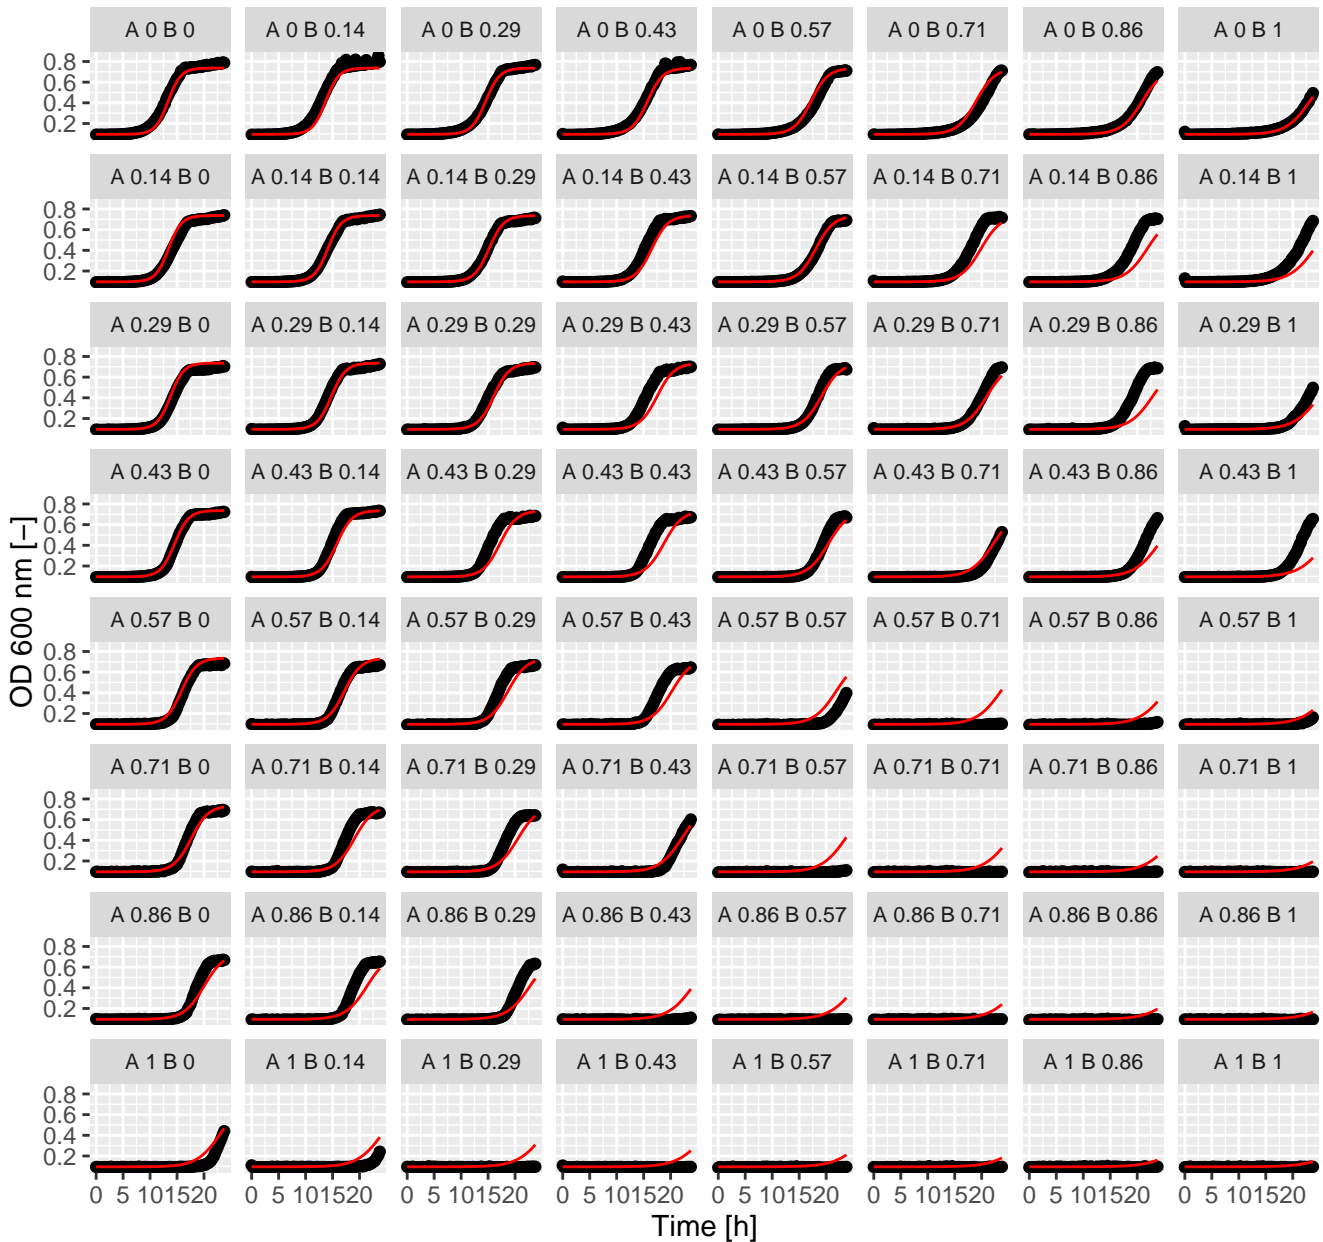

Dyc.Ter (= Ax.Bx) Greco  
alpha = 1.9

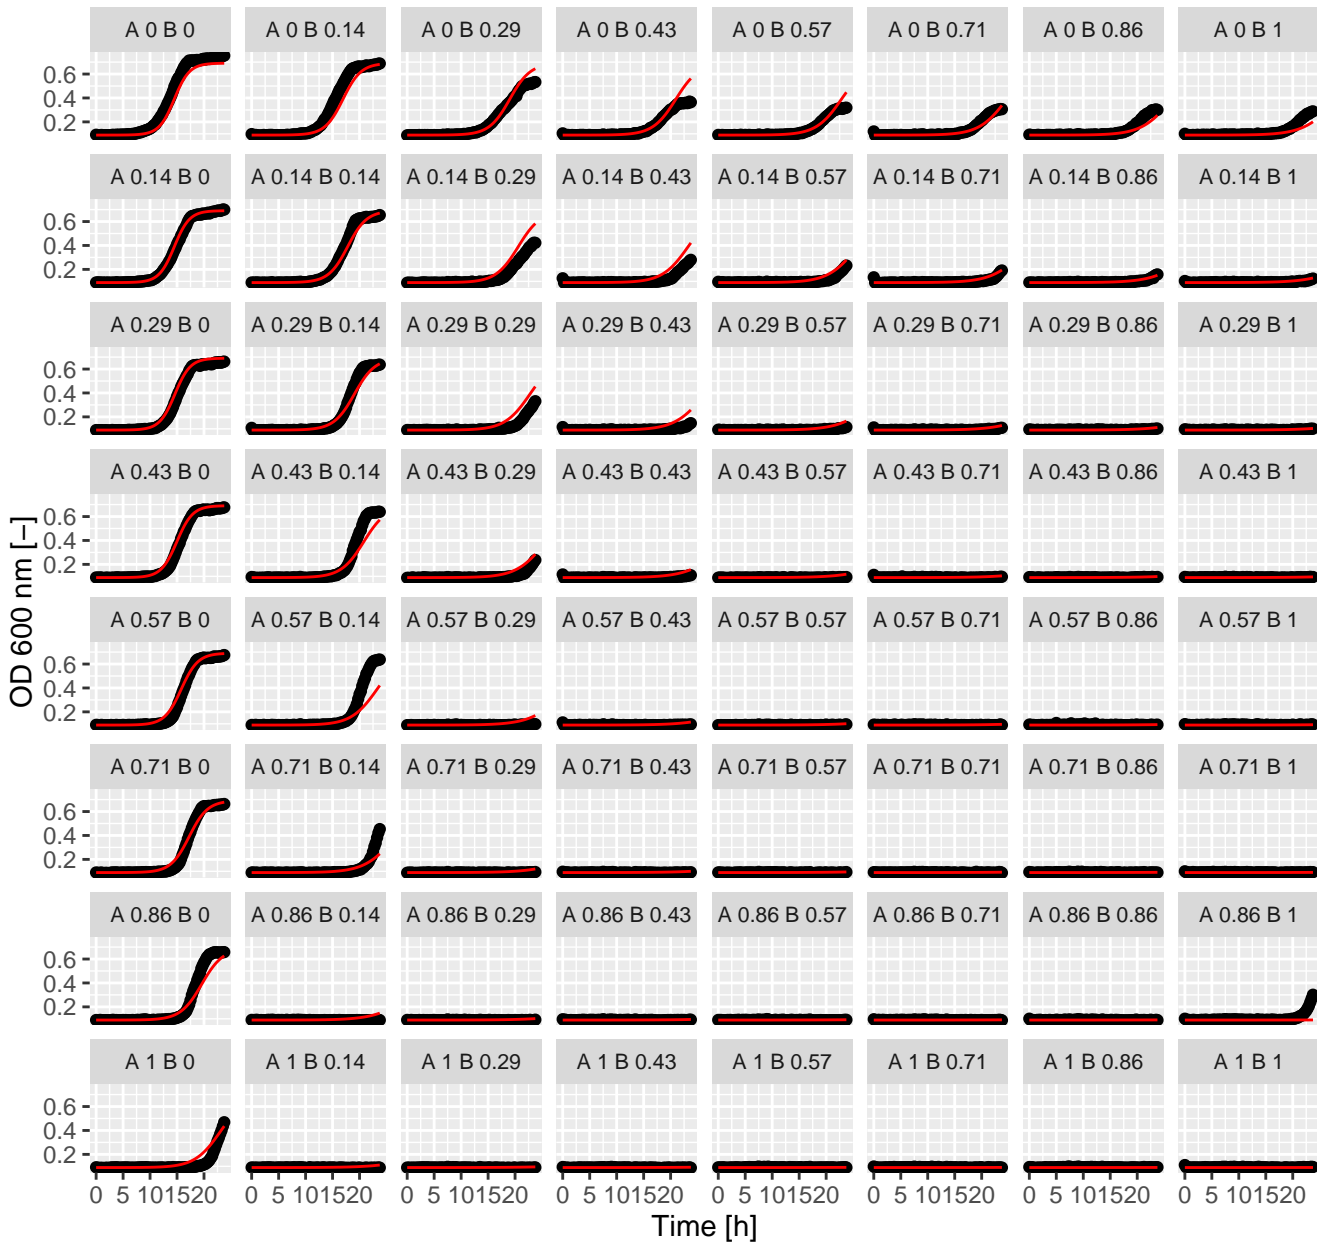

Dyc.Tac (= Ax.Bx) Greco  
alpha = 0.17

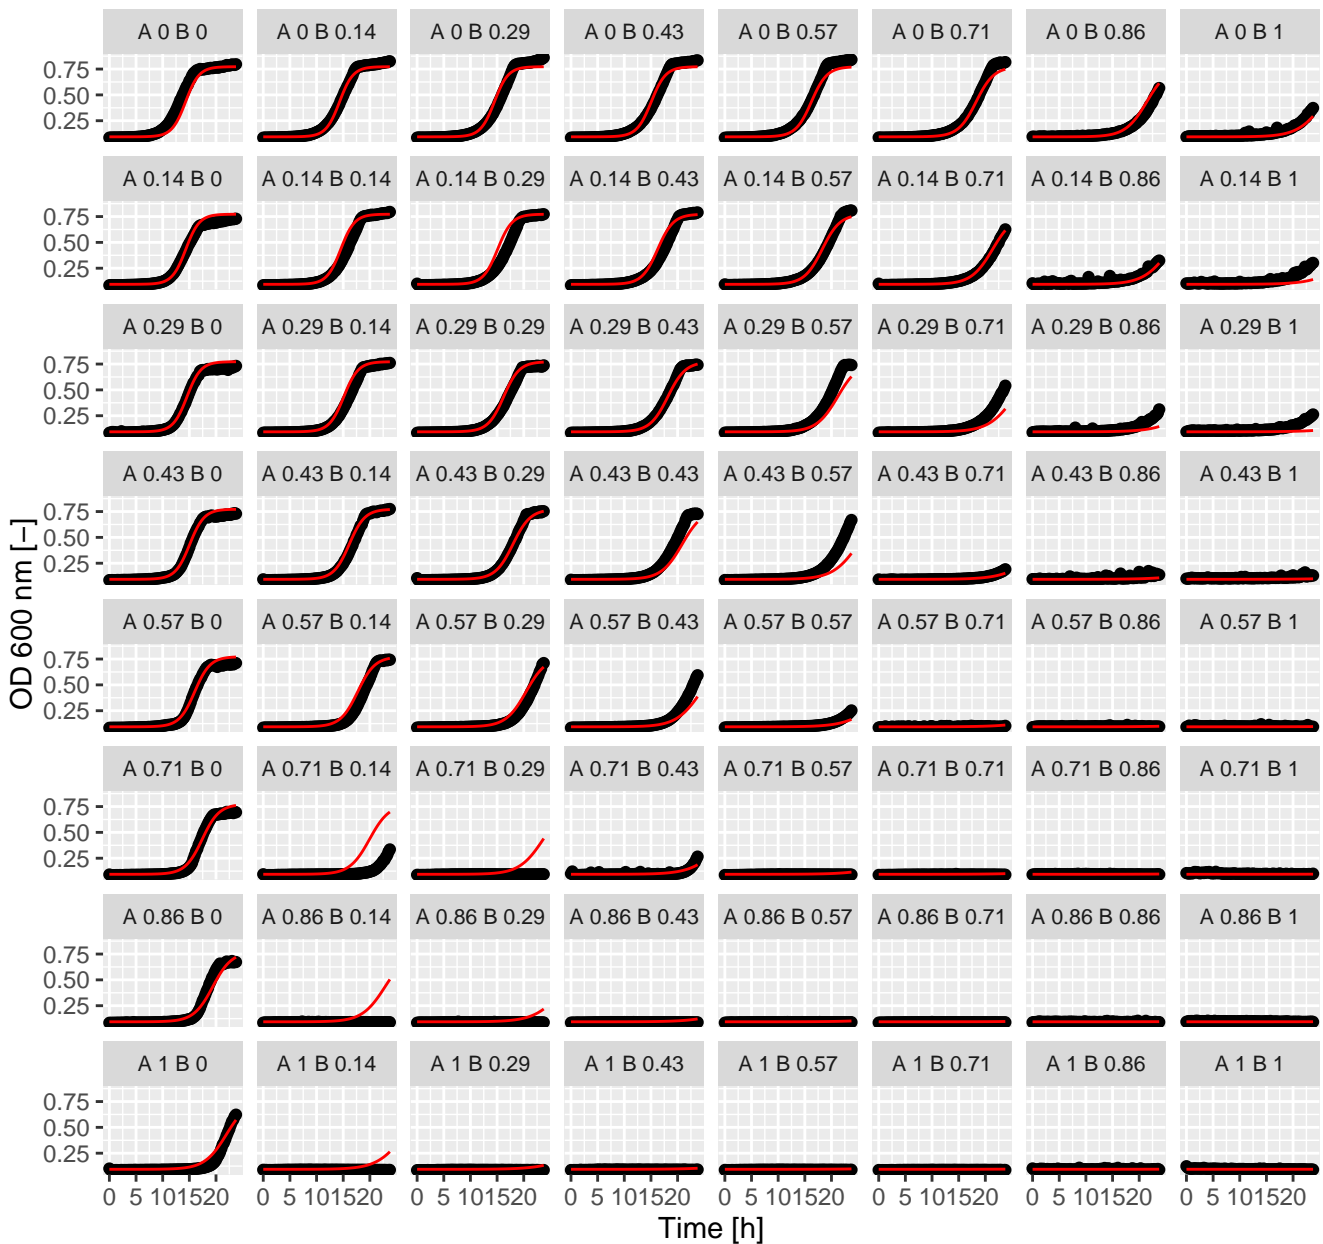



Dyc.Sta (= Ax.Bx) Greco  
alpha = 10.09

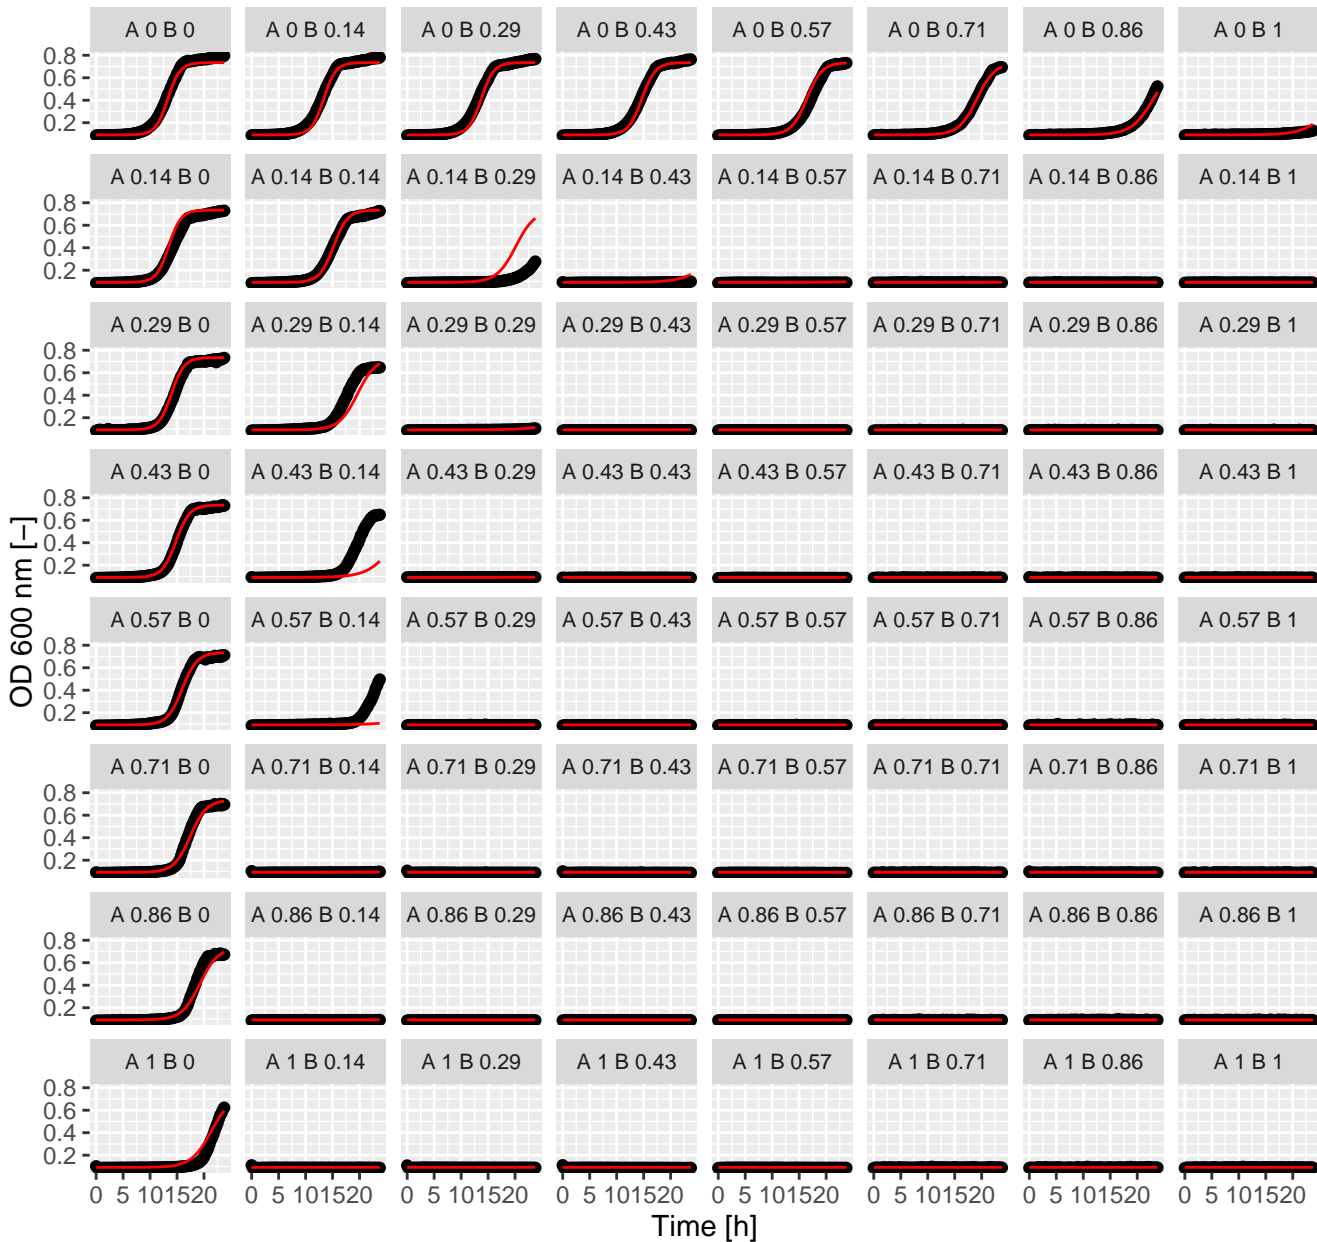

Dyc.Rap (= Ax.Bx) Greco  
alpha = 1.72

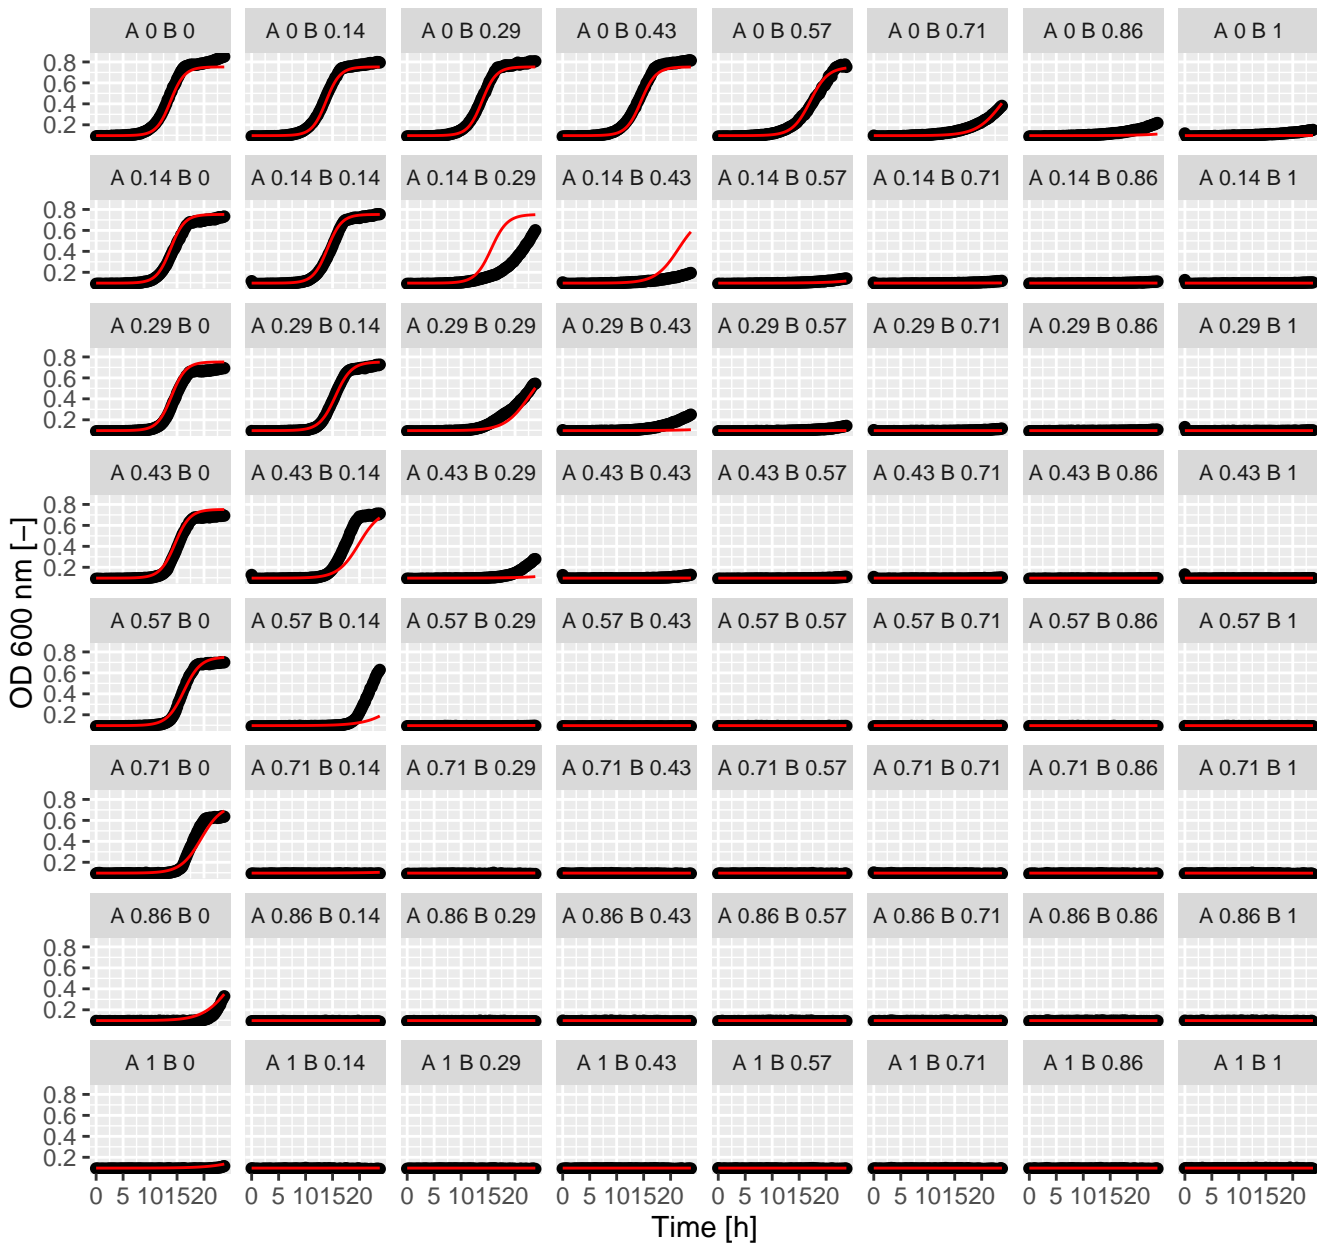

Dyc.Pen (= Ax.Bx) Greco  
alpha = 2.64

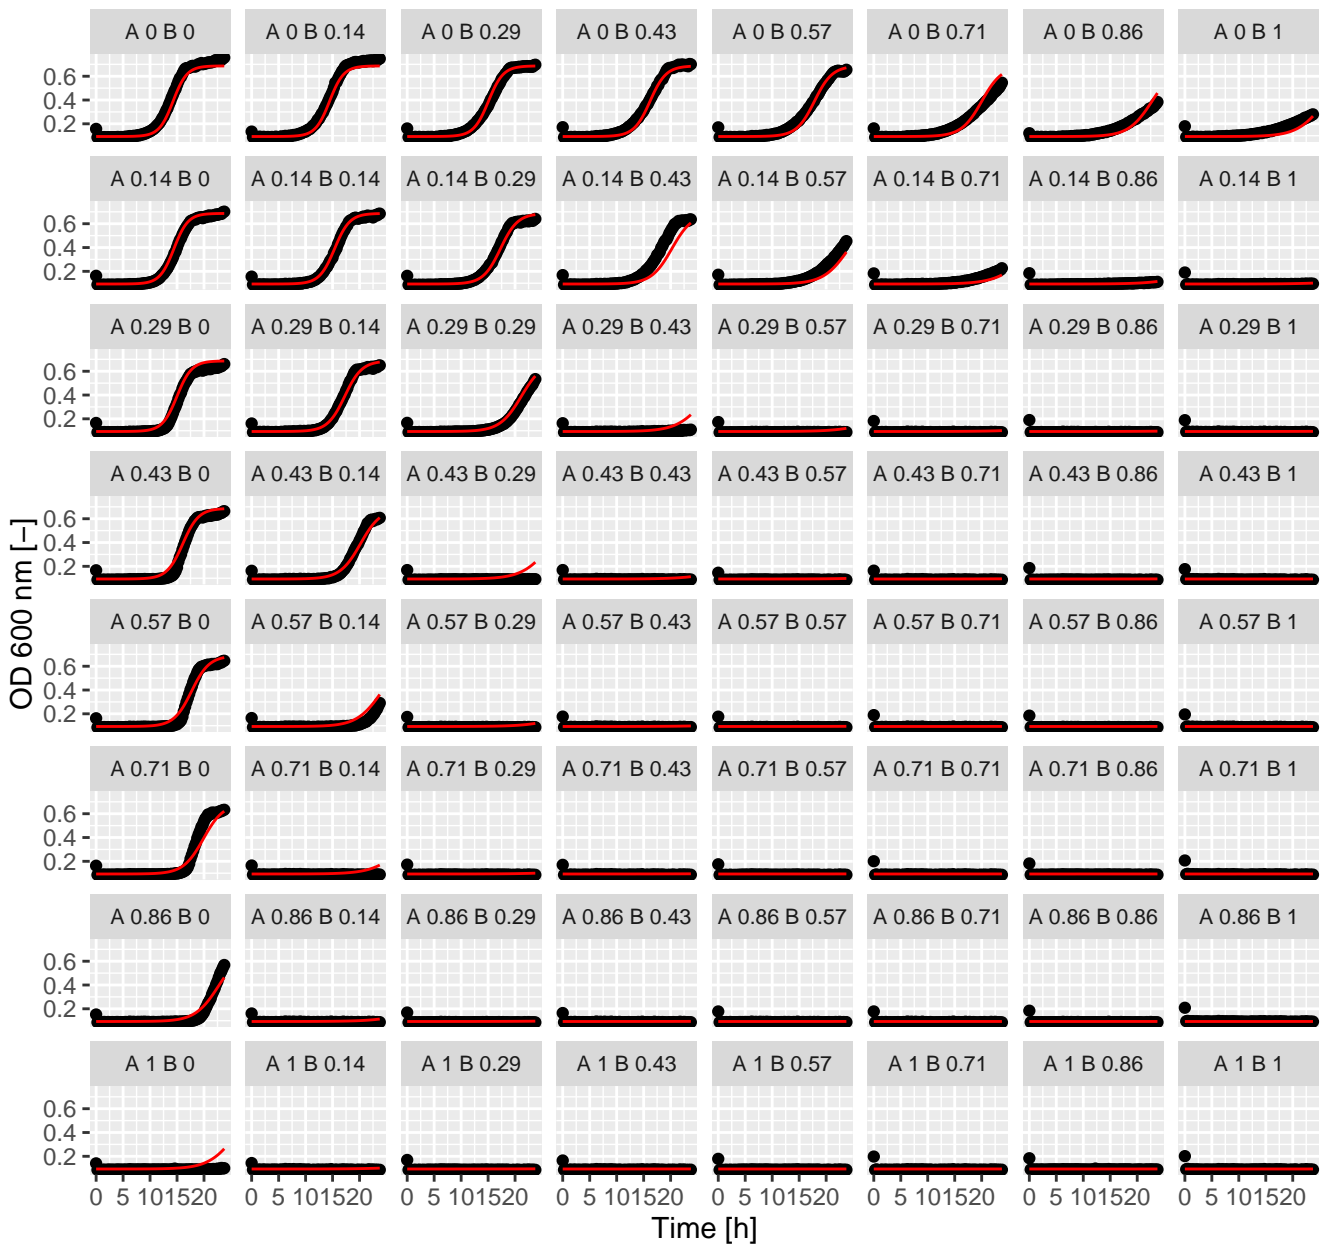

Dyc.Lat (= Ax.Bx) Greco  
 $\alpha = 10.91$

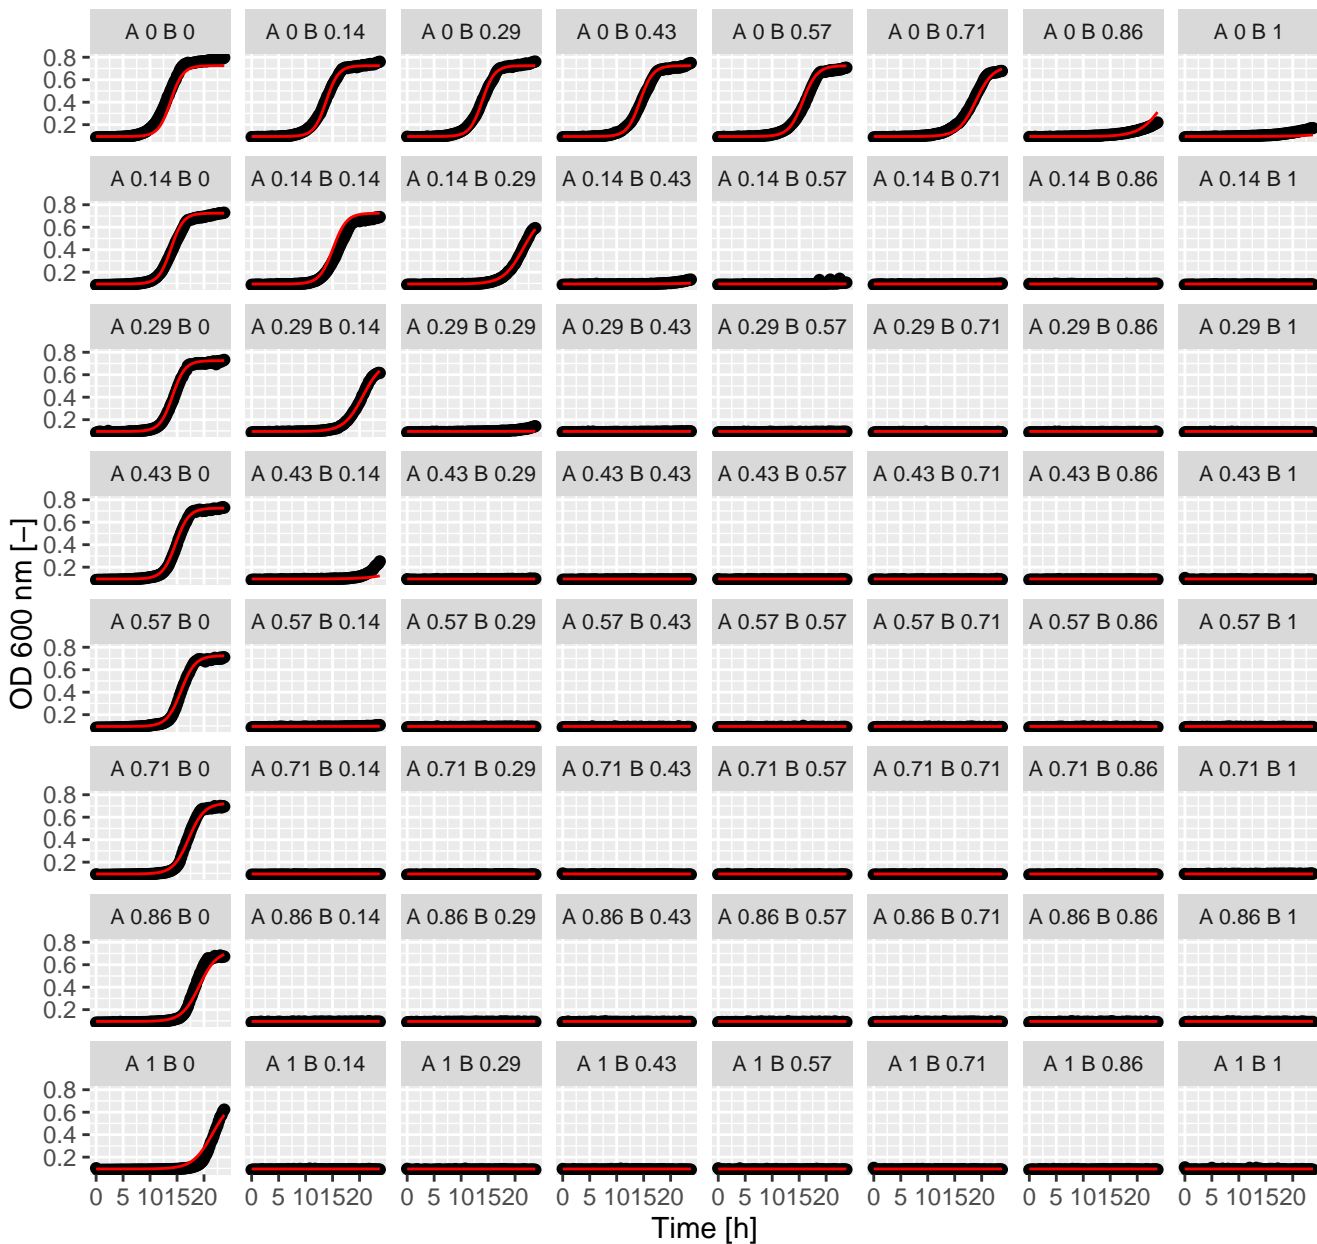

Dyc.Hal (= Ax.Bx) Greco  
alpha = -0.57

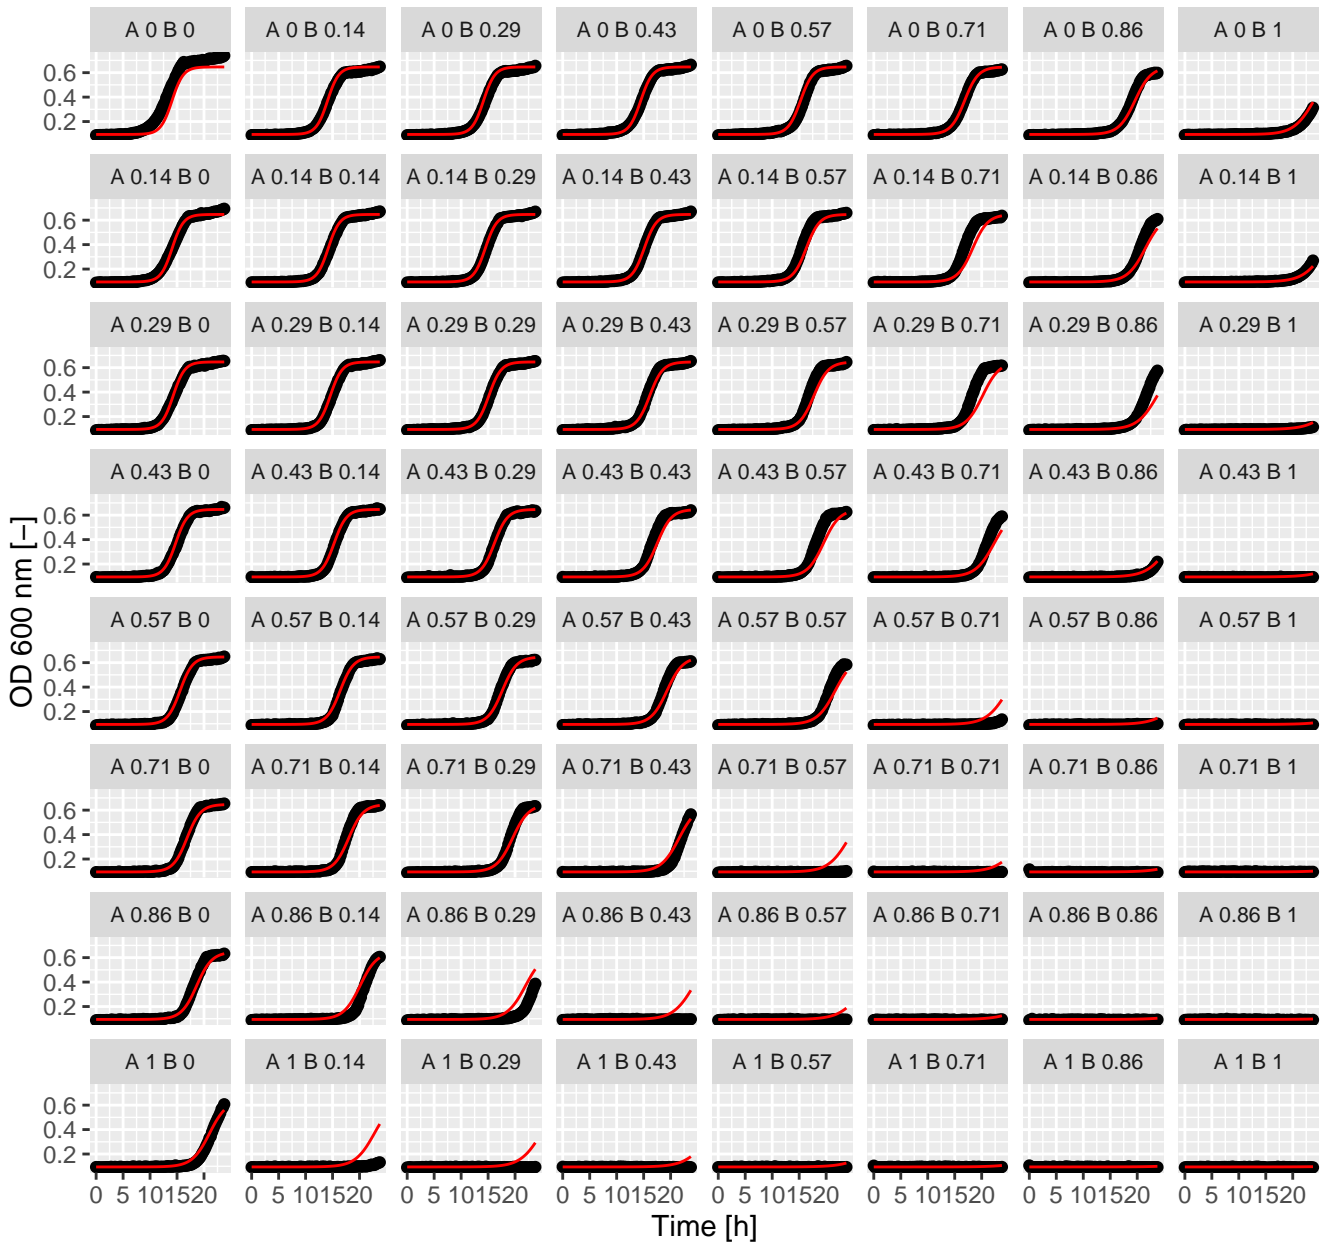

Dyc.Fen (= Ax.Bx) Greco  
 $\alpha = -1.04$

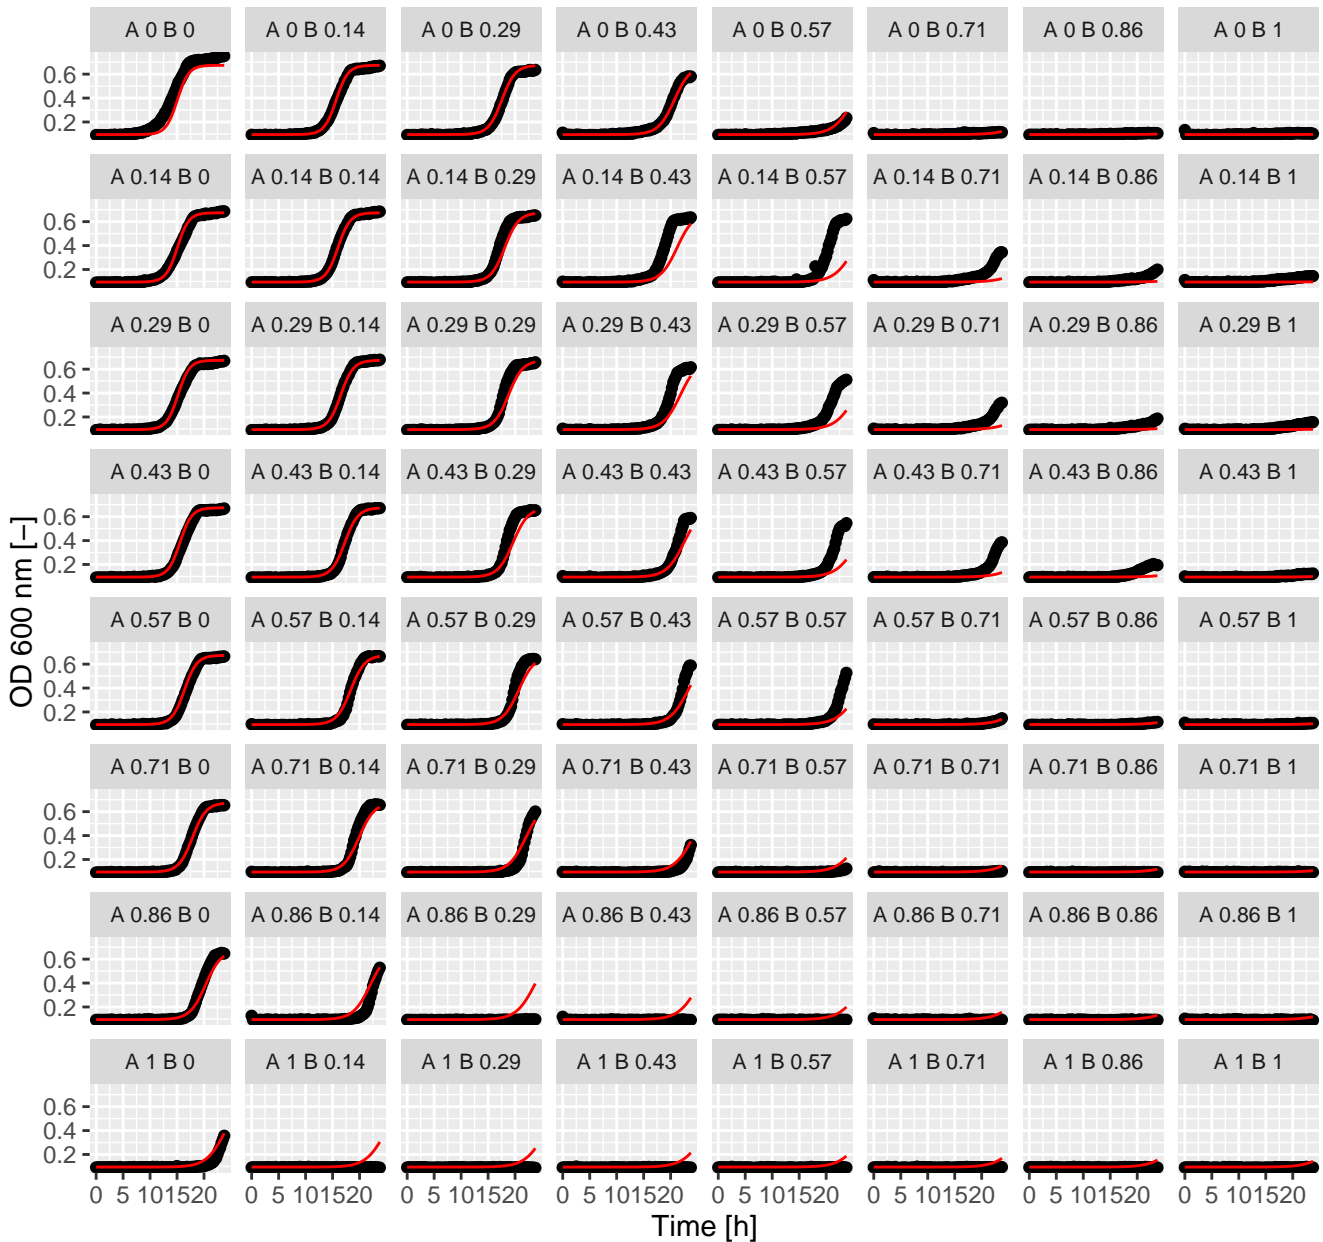

Dyc.Dyc (= Ax.Bx) Greco  
alpha = 0.07

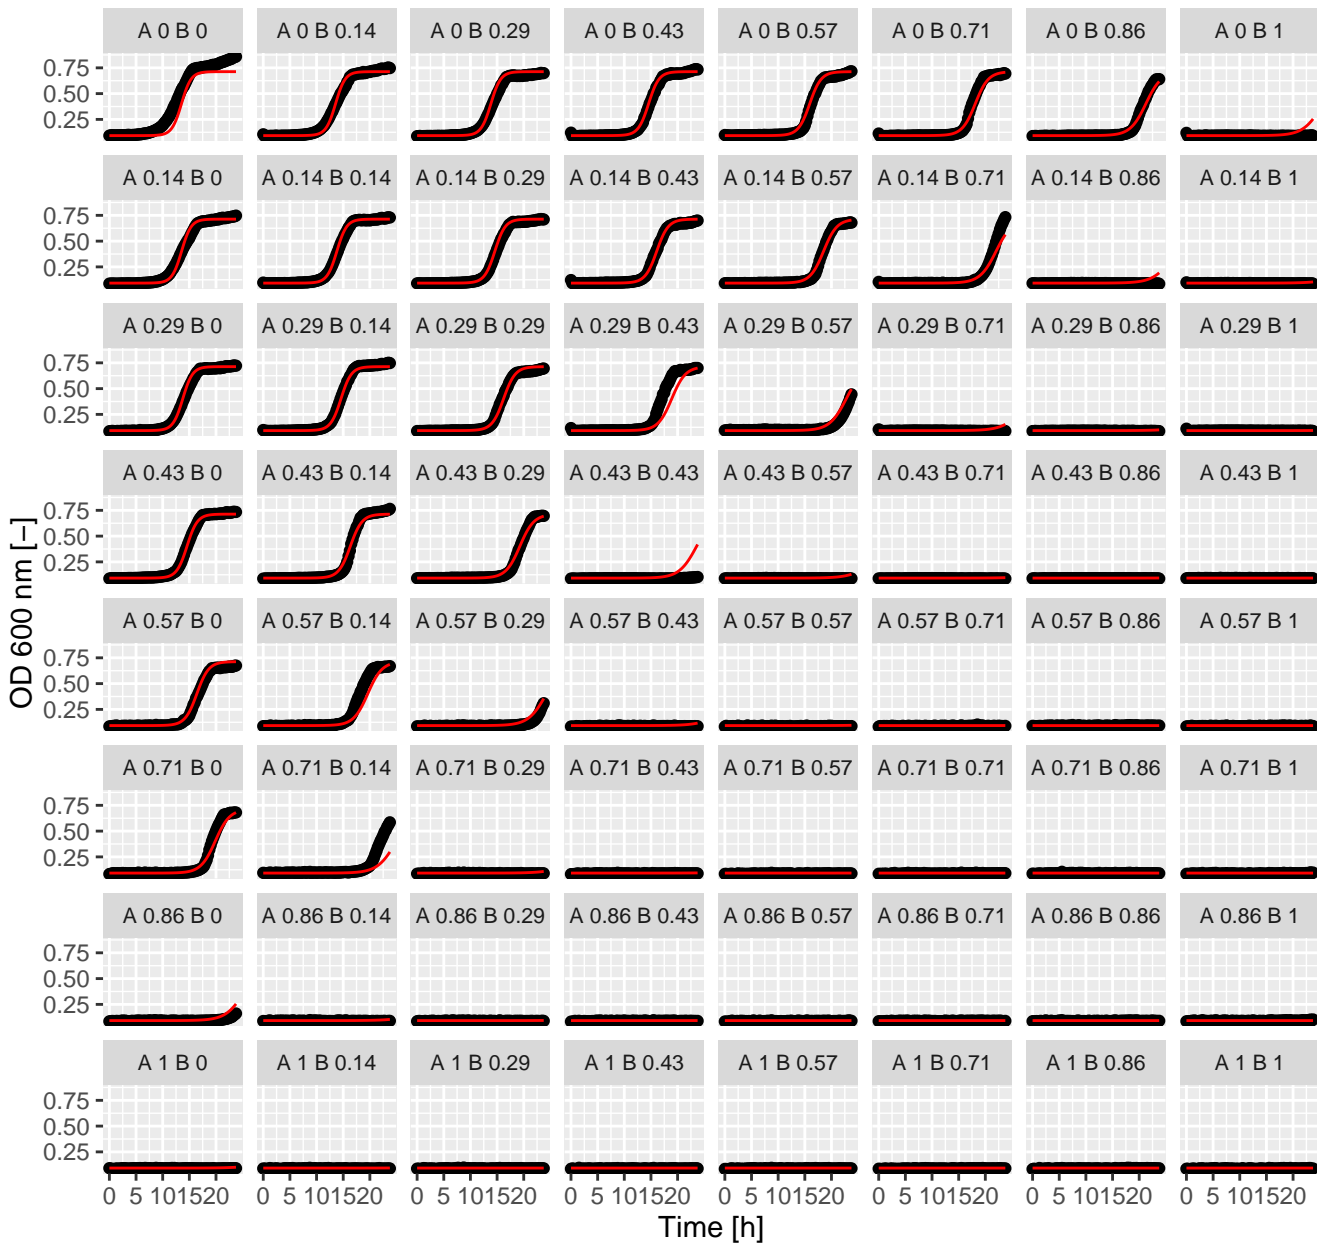

Cyc.Ter (= Ax.Bx) Greco  
 $\alpha = -0.22$

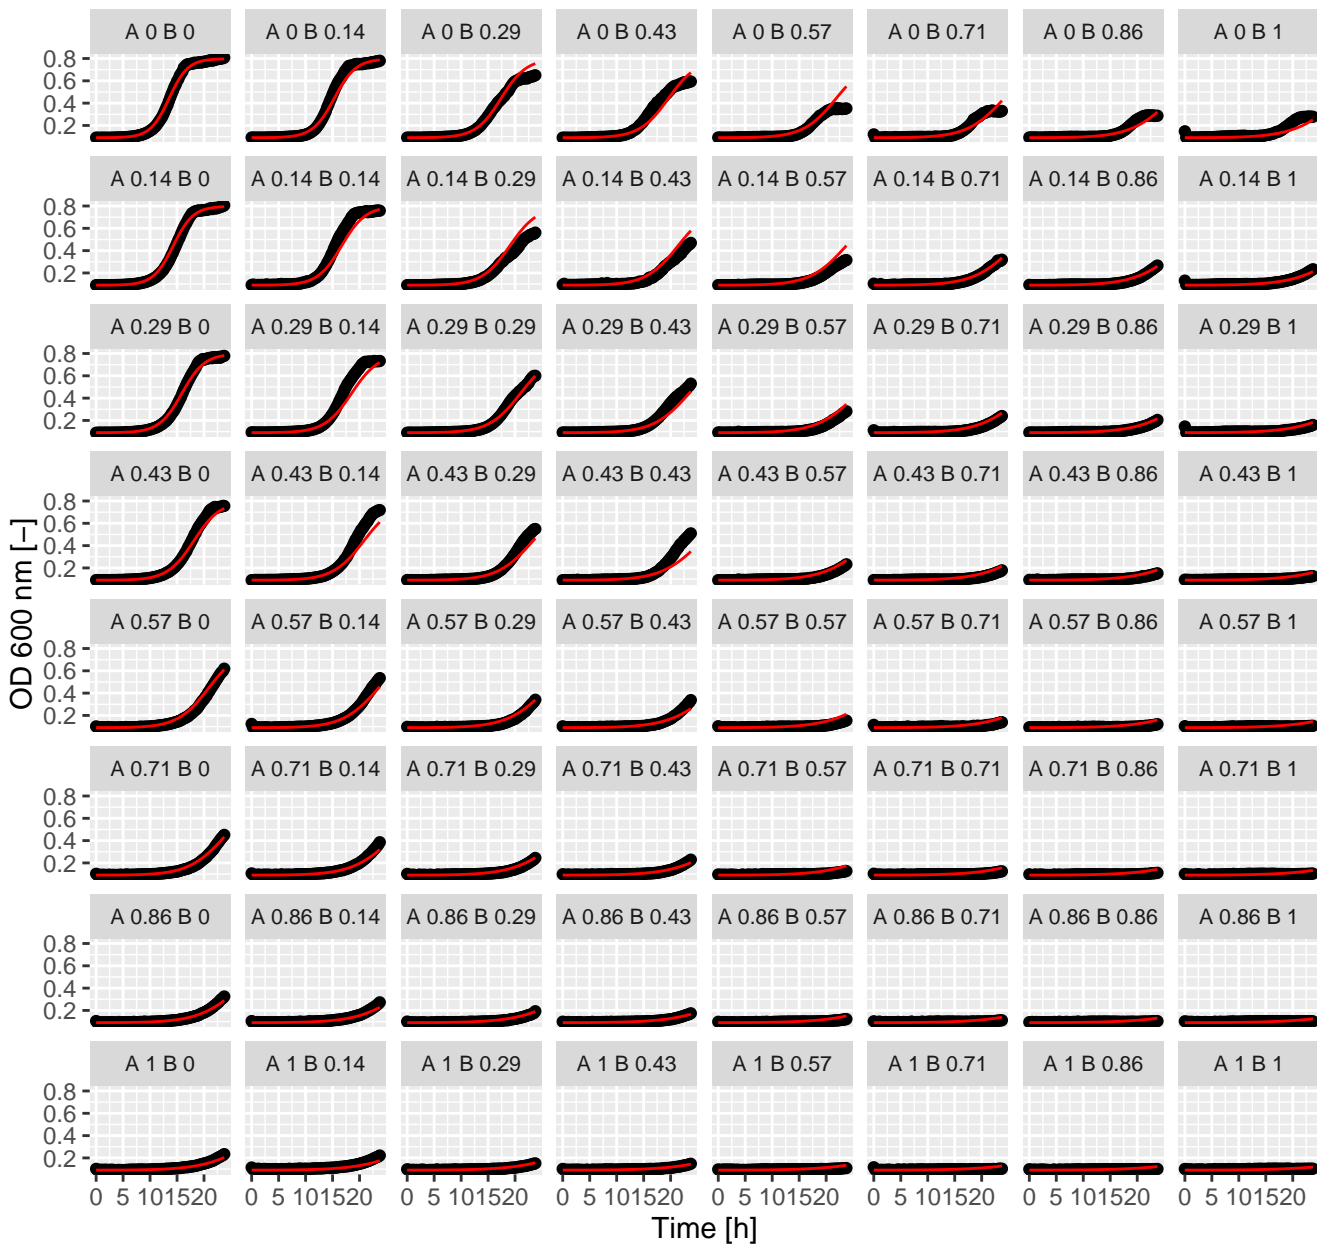



Cyc.Tac (= Ax.Bx) Greco  
alpha = 24.81

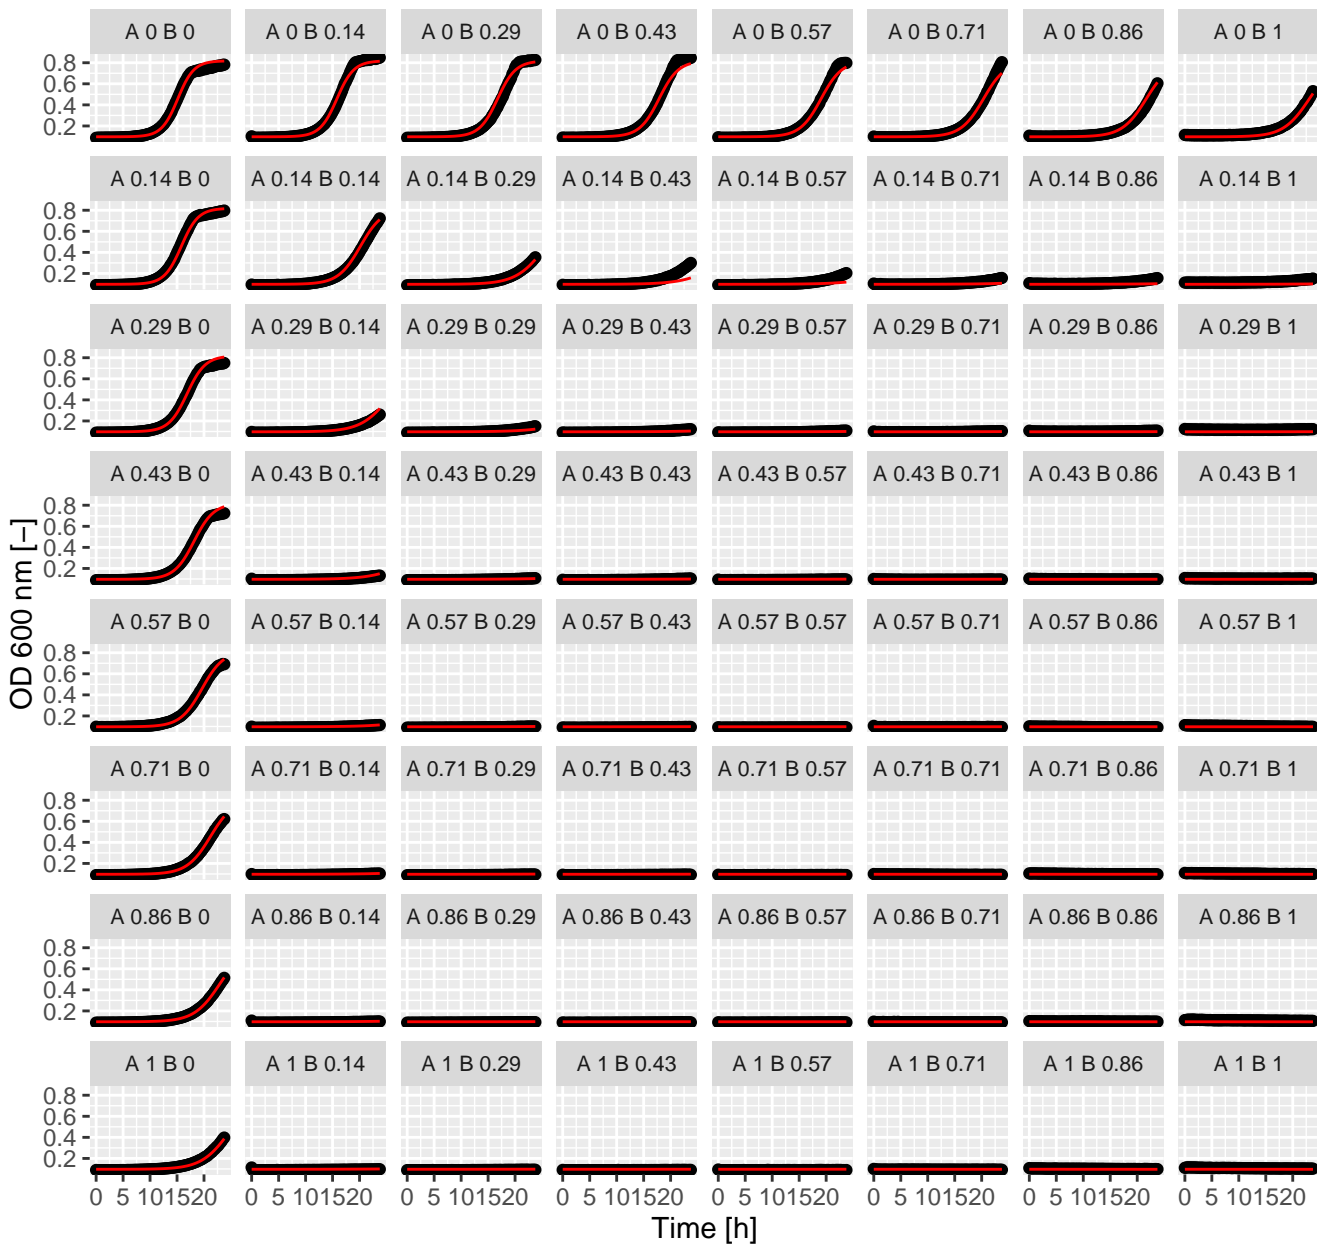

Cyc.Sta (= Ax.Bx) Greco  
 $\alpha = -0.96$

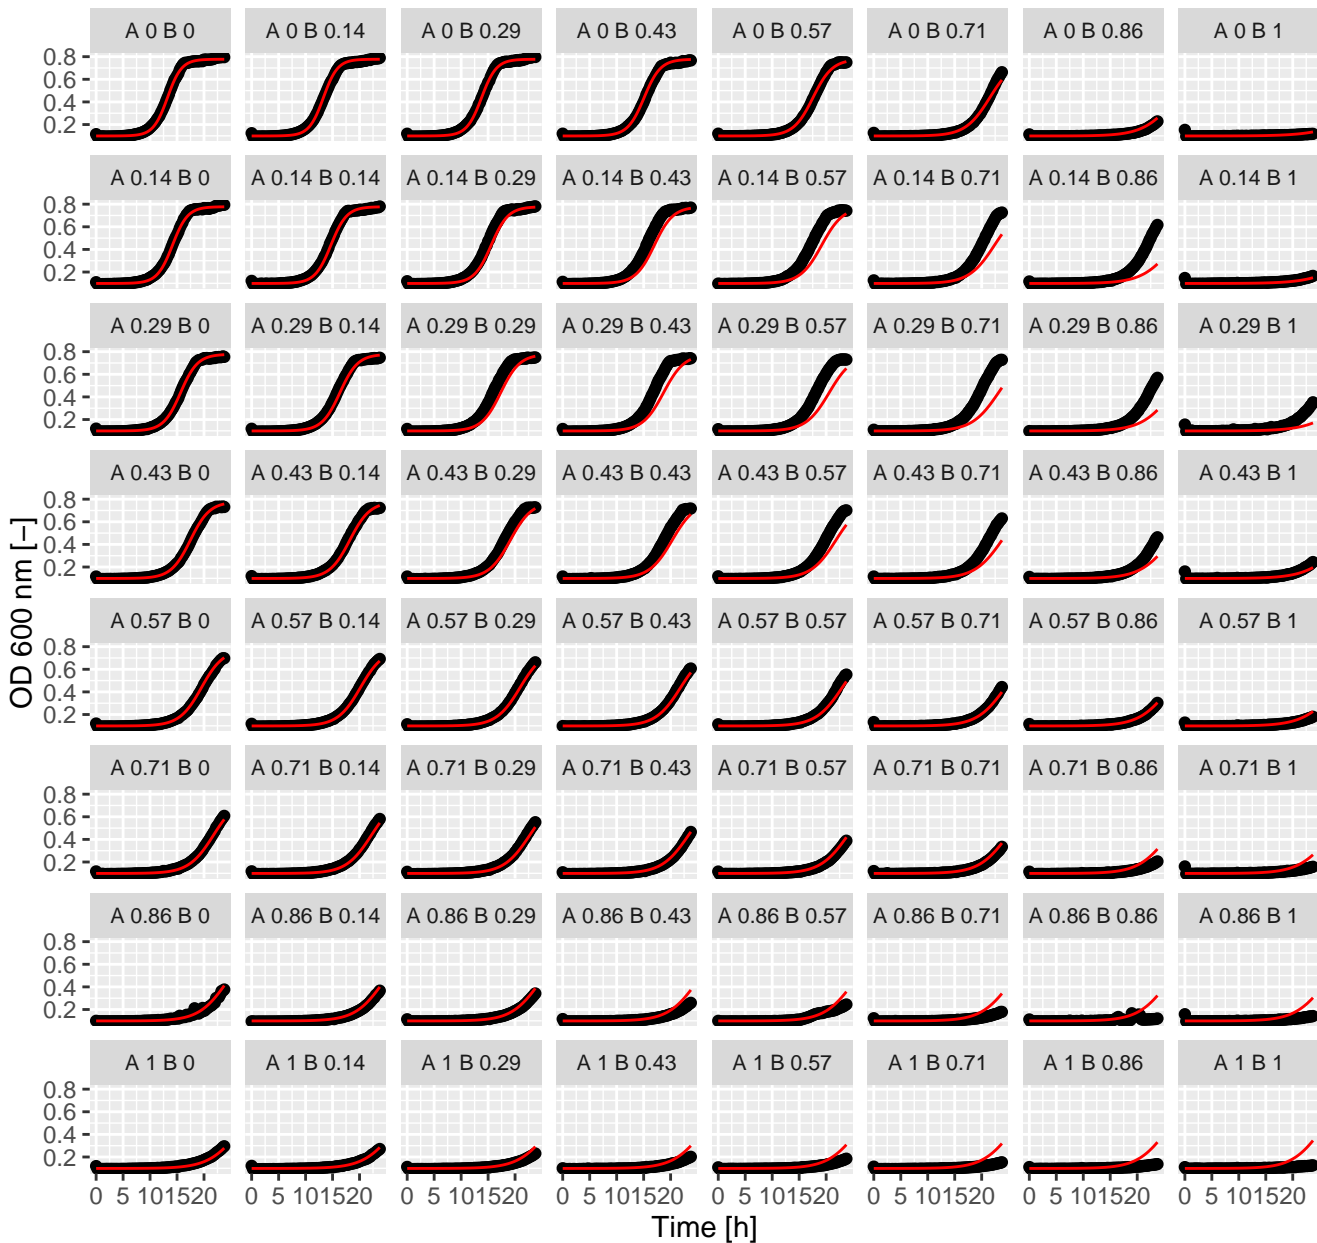

Cyc.Rad (= Ax.Bx) Greco  
 $\alpha = -1.48$

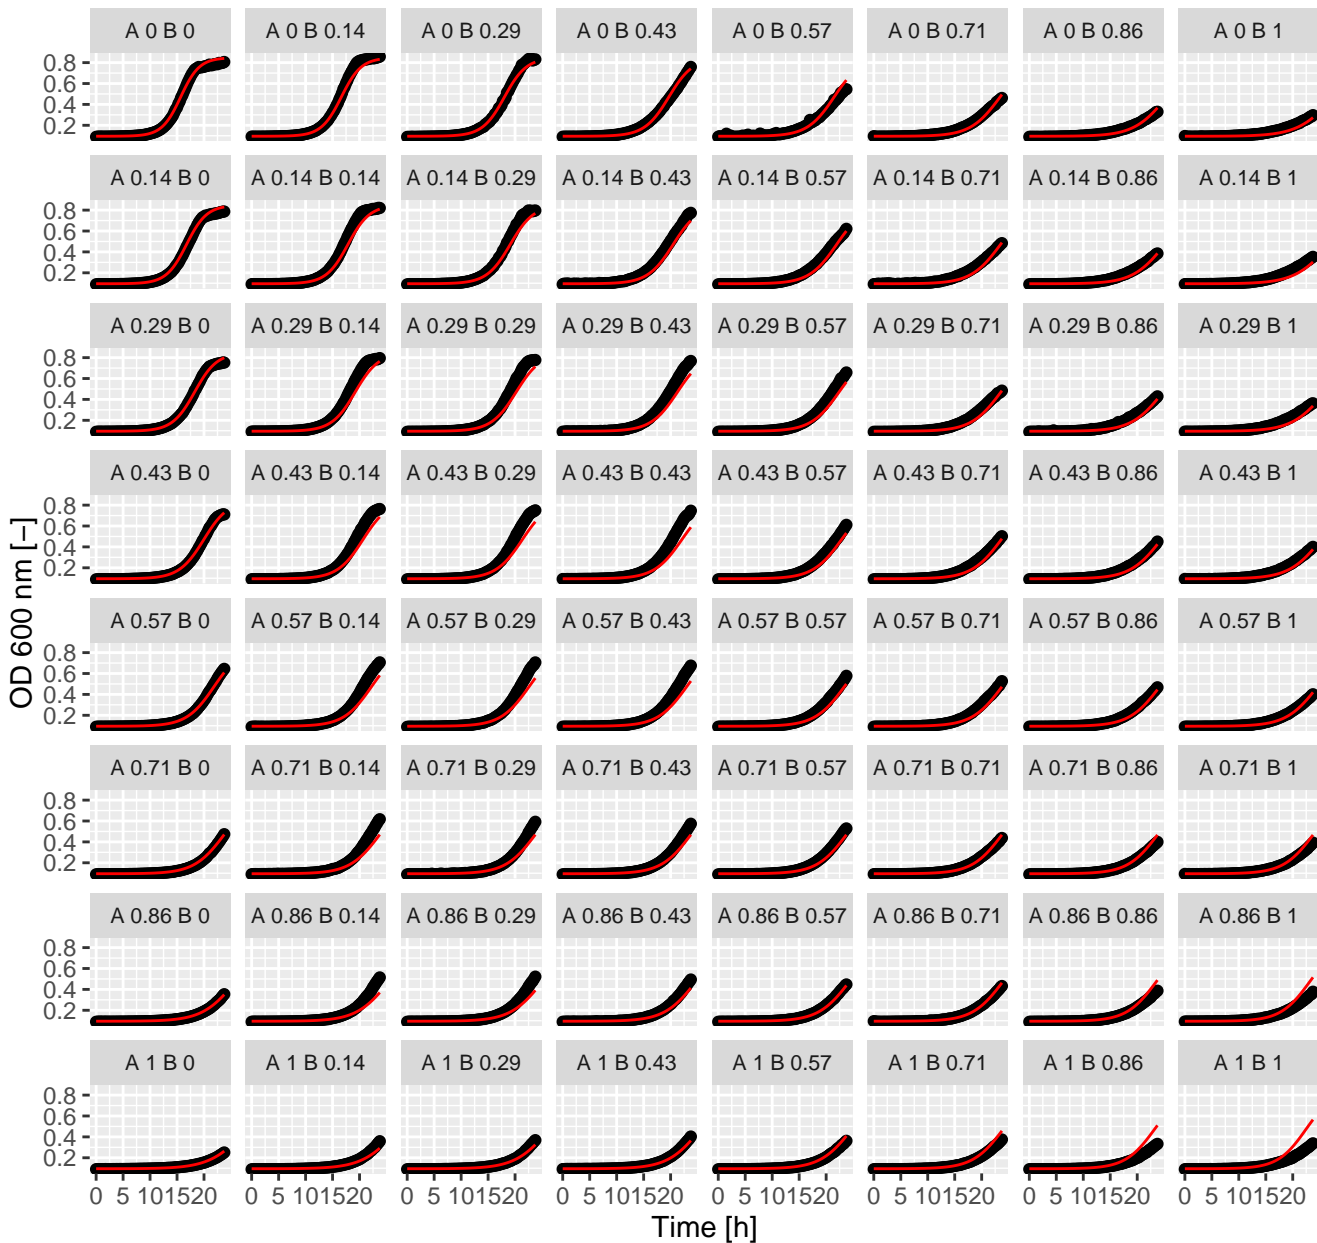

Cyc.Pen (= Ax.Bx) Greco  
 $\alpha = -0.38$

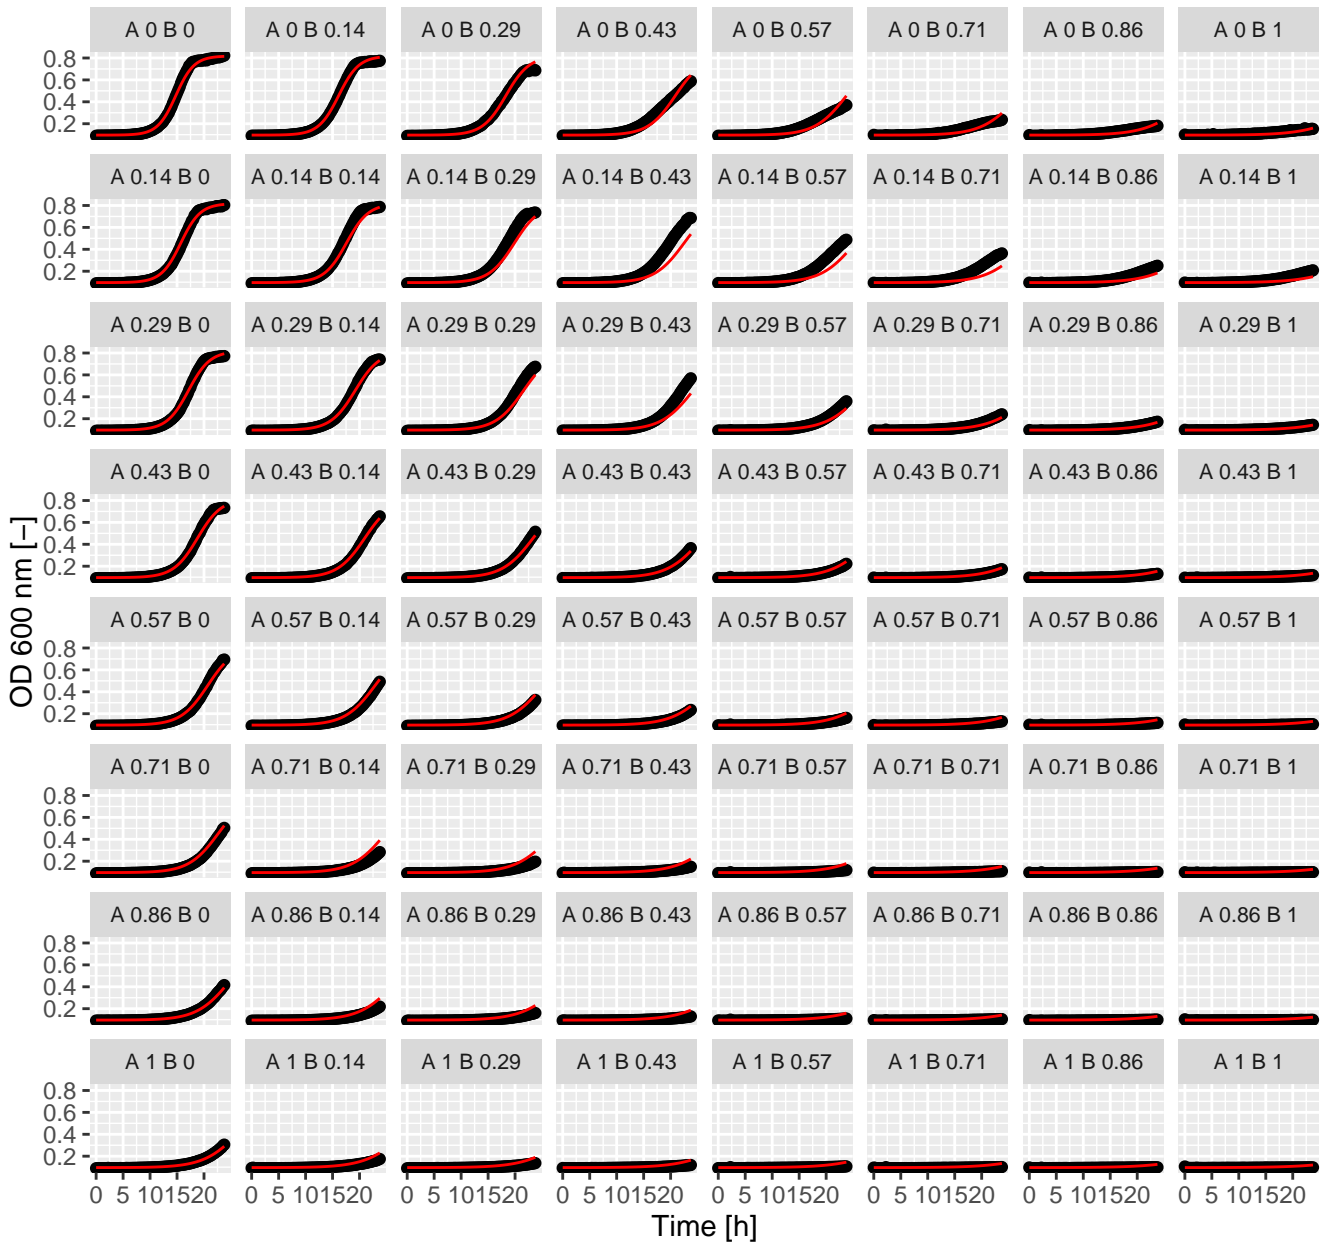

Cyc.Lat (= Ax.Bx) Greco  
 $\alpha = -0.98$

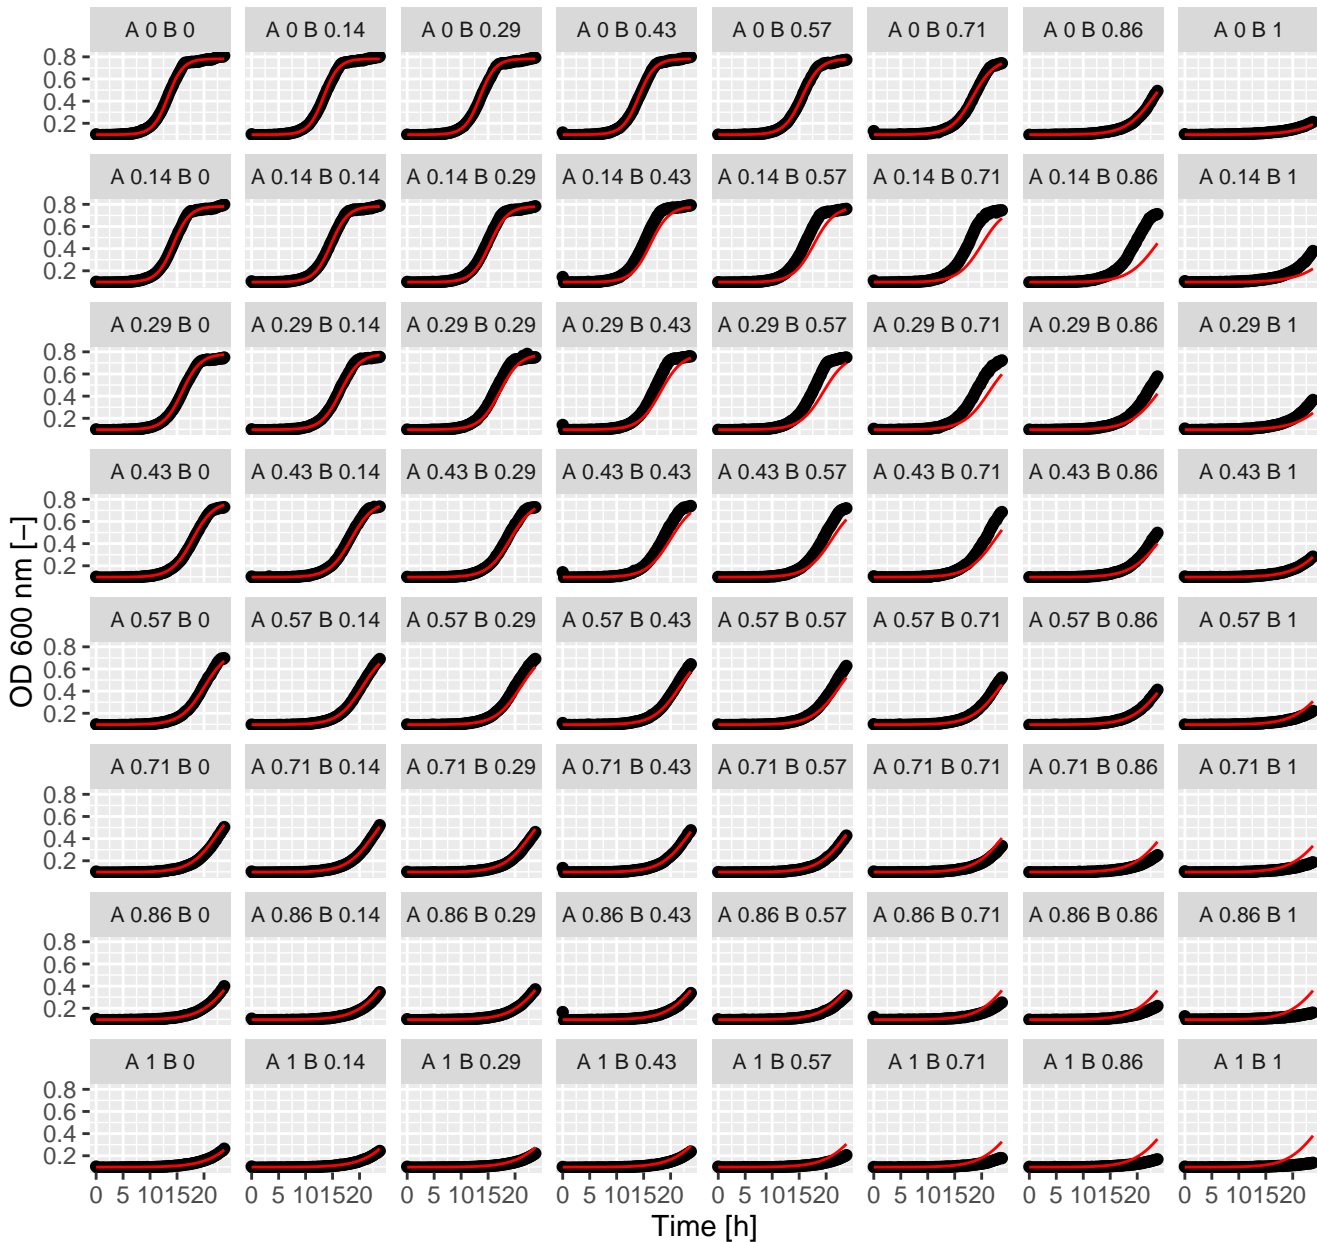

Cyc.Cyc (= Ax.Bx) Greco  
alpha = -0.12

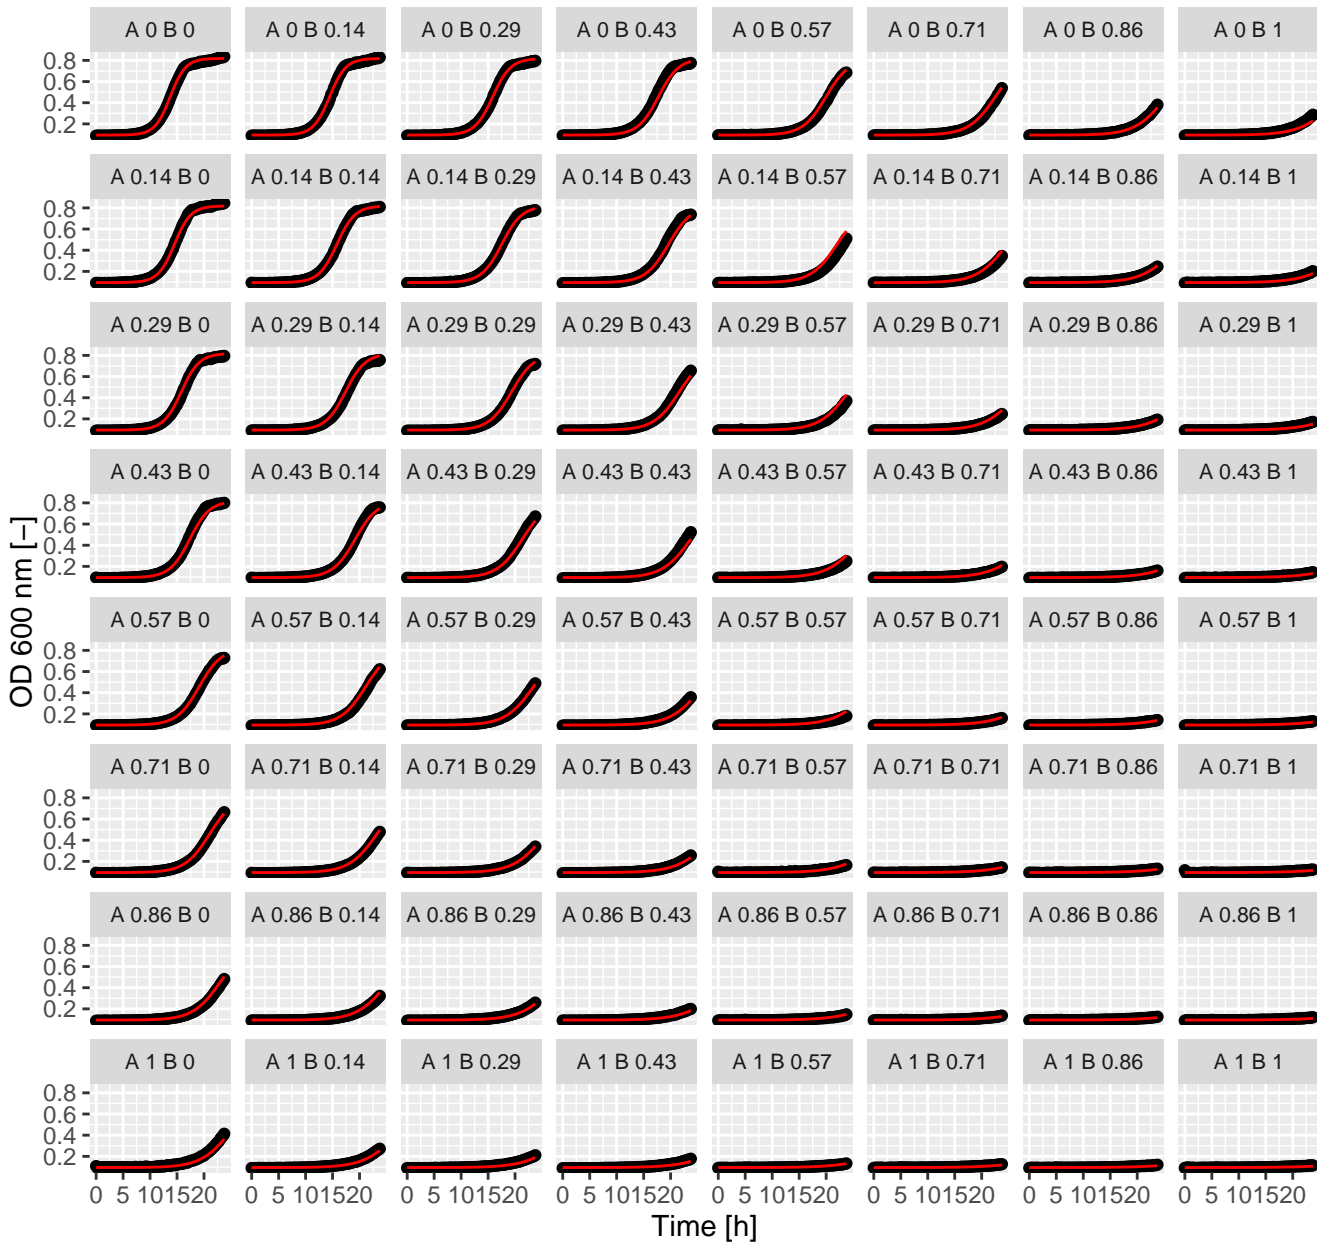

Clo.Rad (= Ax.Bx) Greco  
 $\alpha = -0.78$

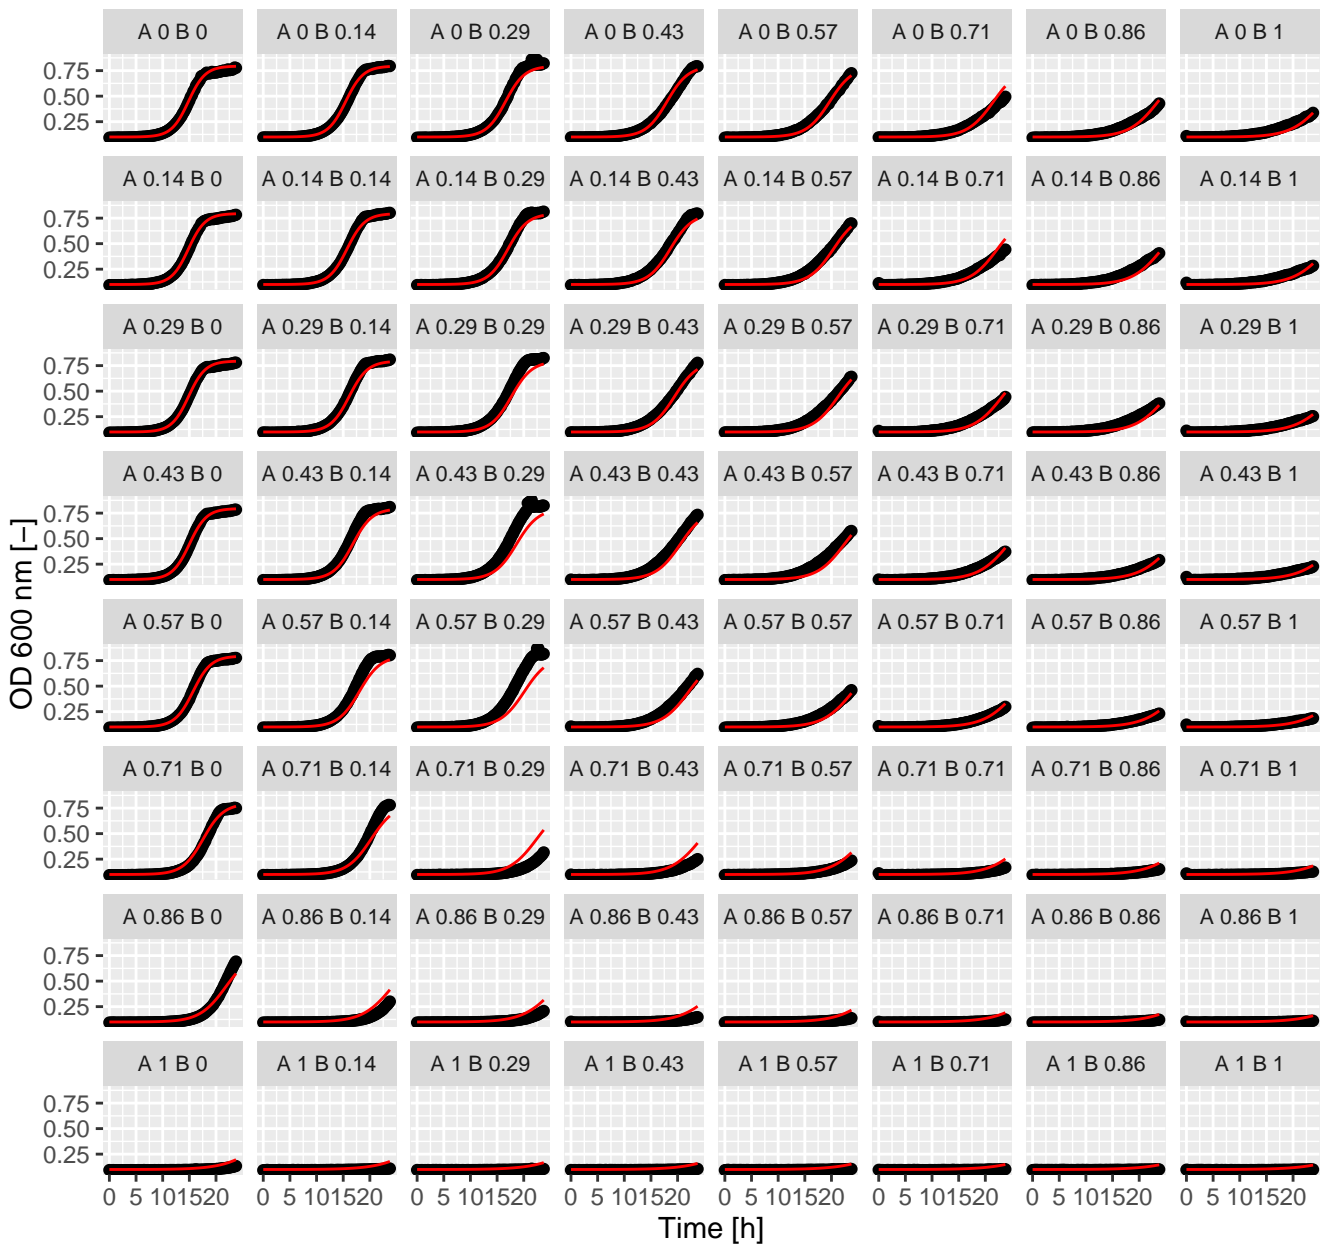

Cis.Ter (= Ax.Bx) Greco  
 $\alpha = -0.01$

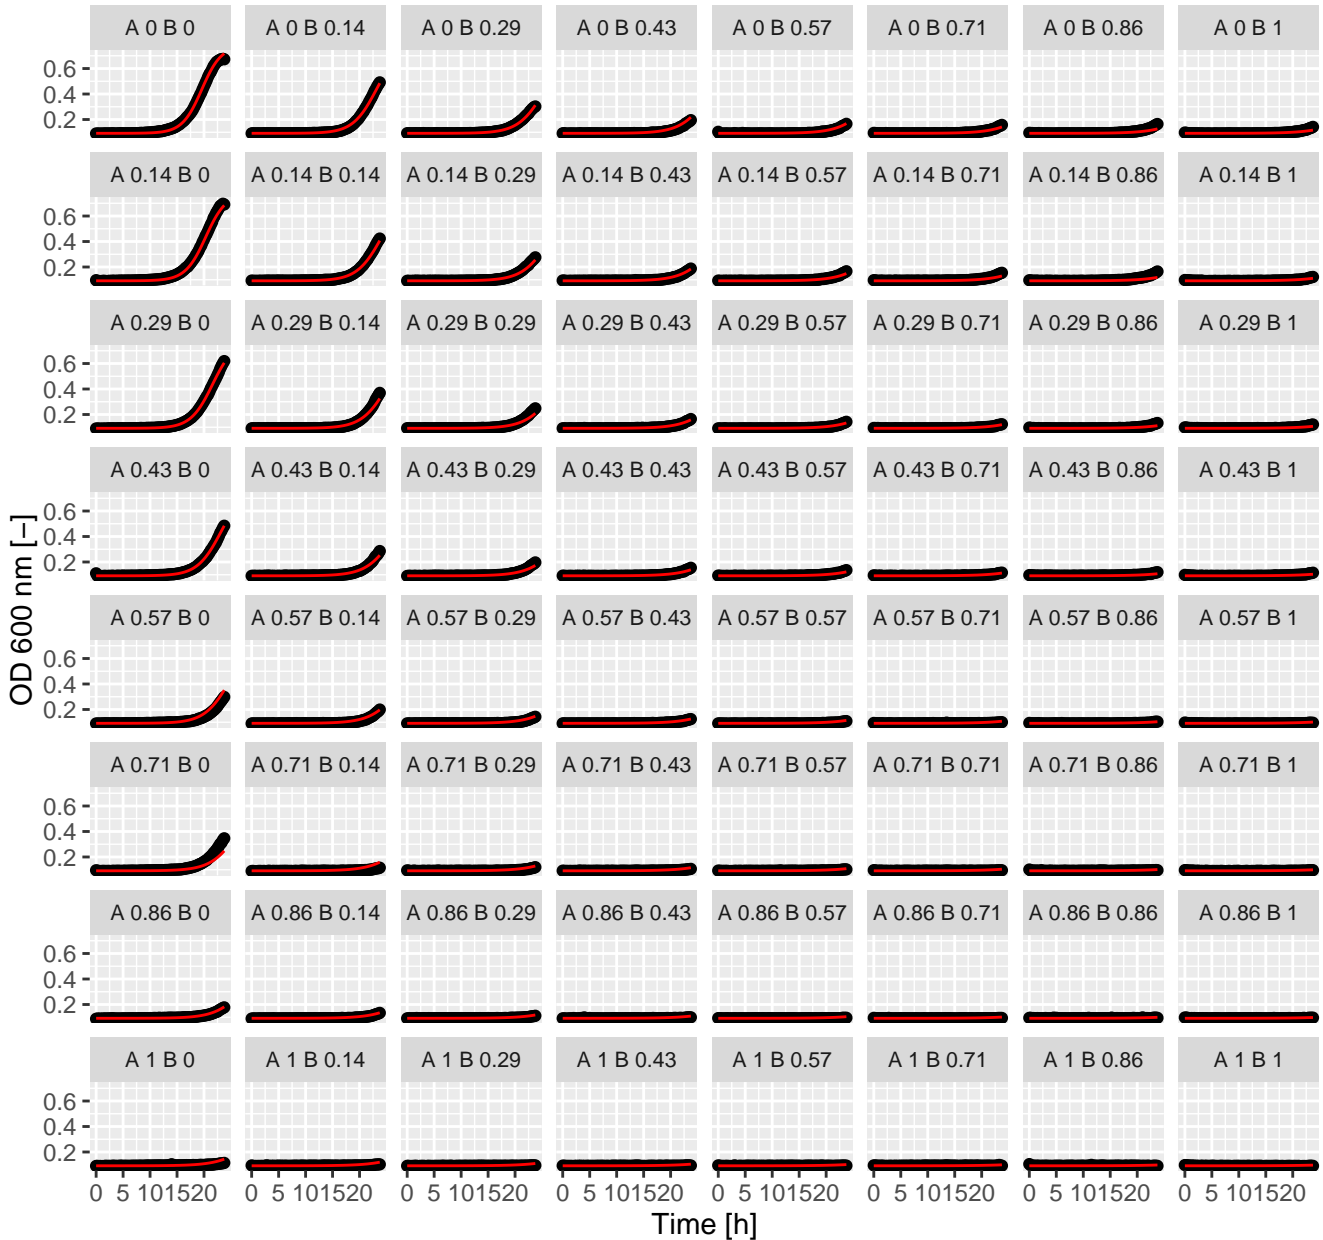



Cis.Tac (= Ax.Bx) Greco  
alpha = 4.1

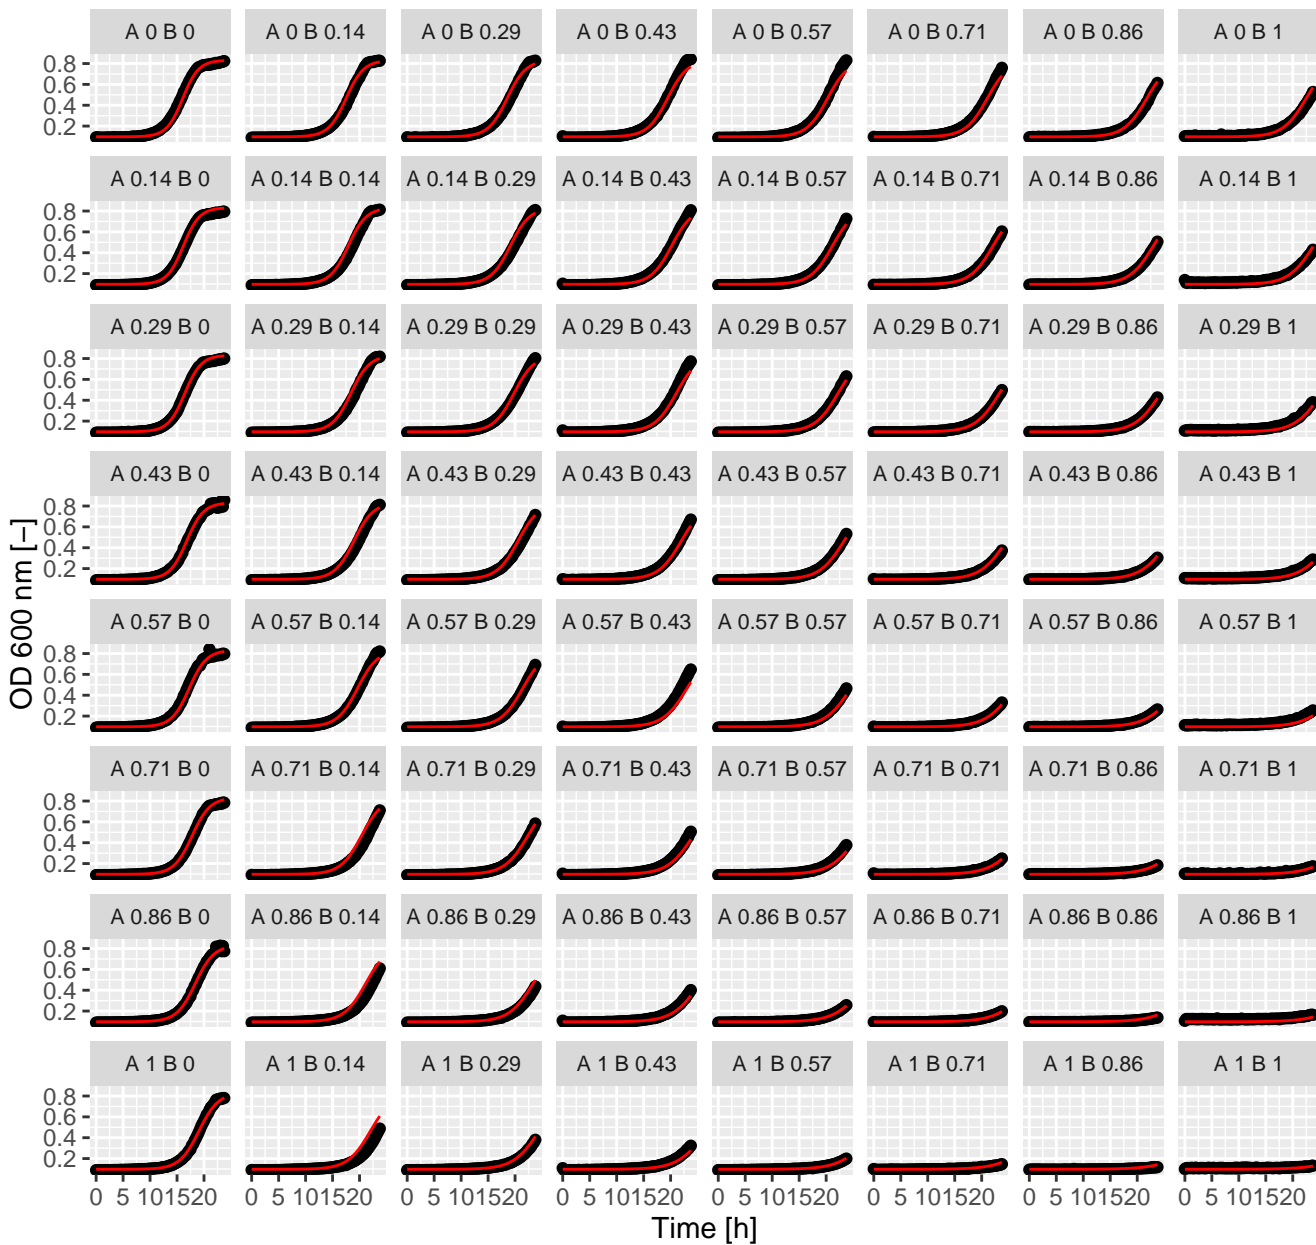

Cis.Sta (= Ax.Bx) Greco  
 $\alpha = -1.19$

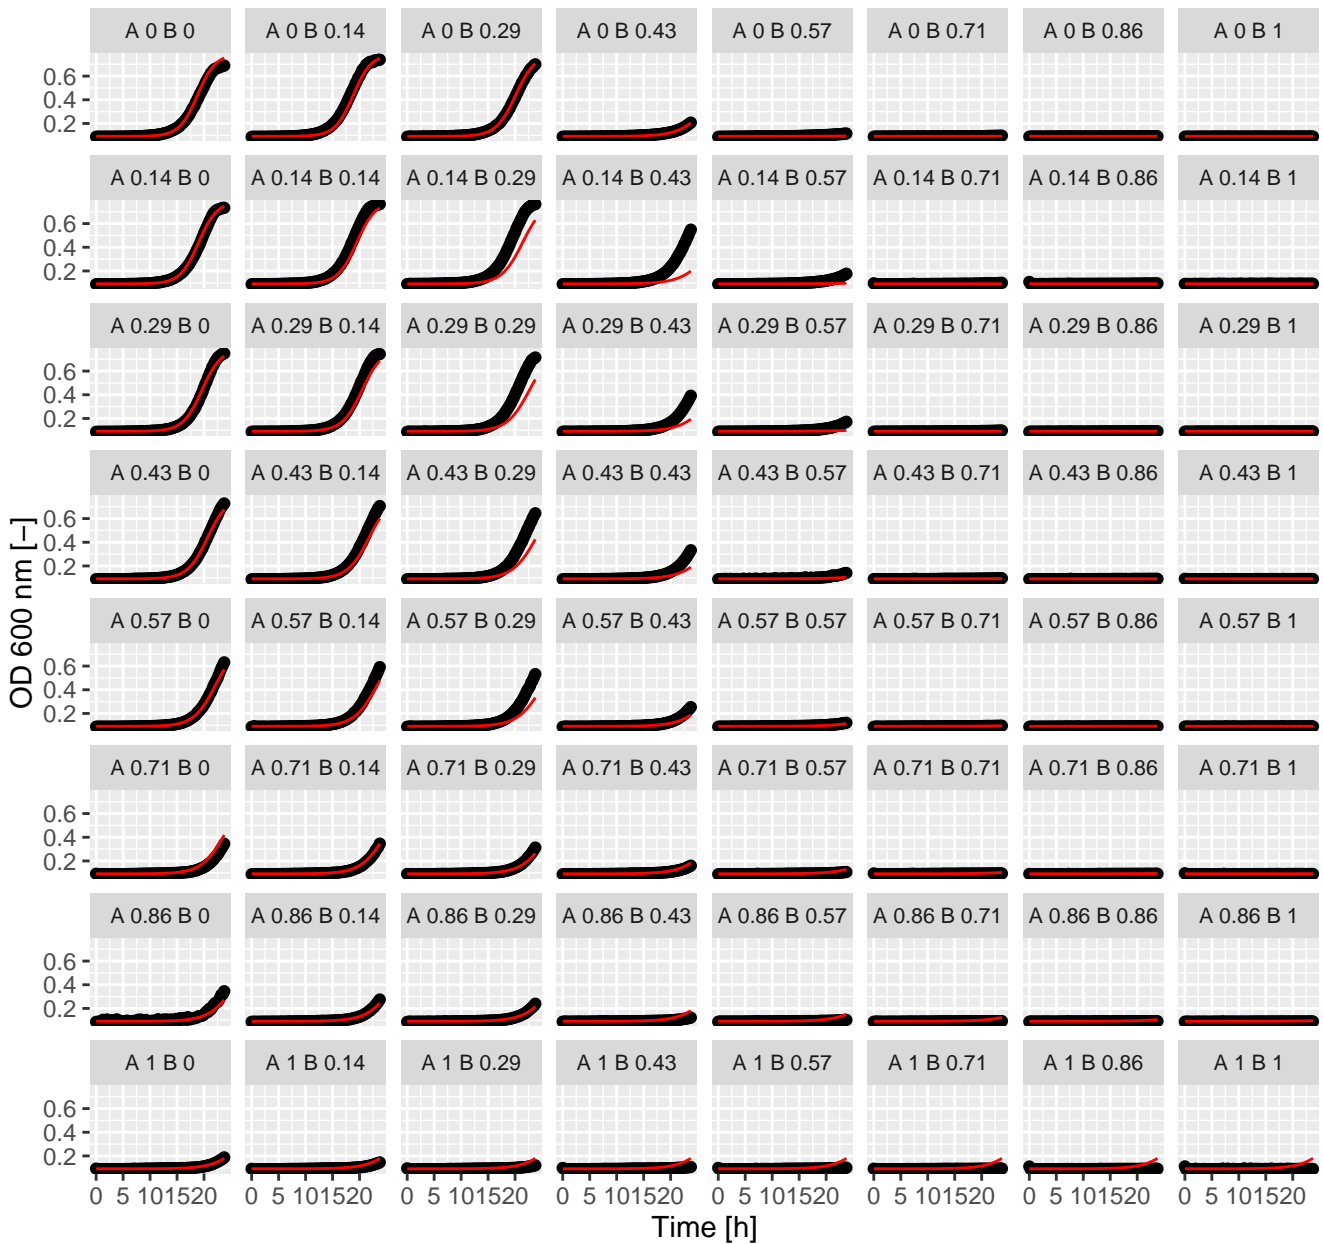

Cis.Lat (= Ax.Bx) Greco  
 $\alpha = -1.13$

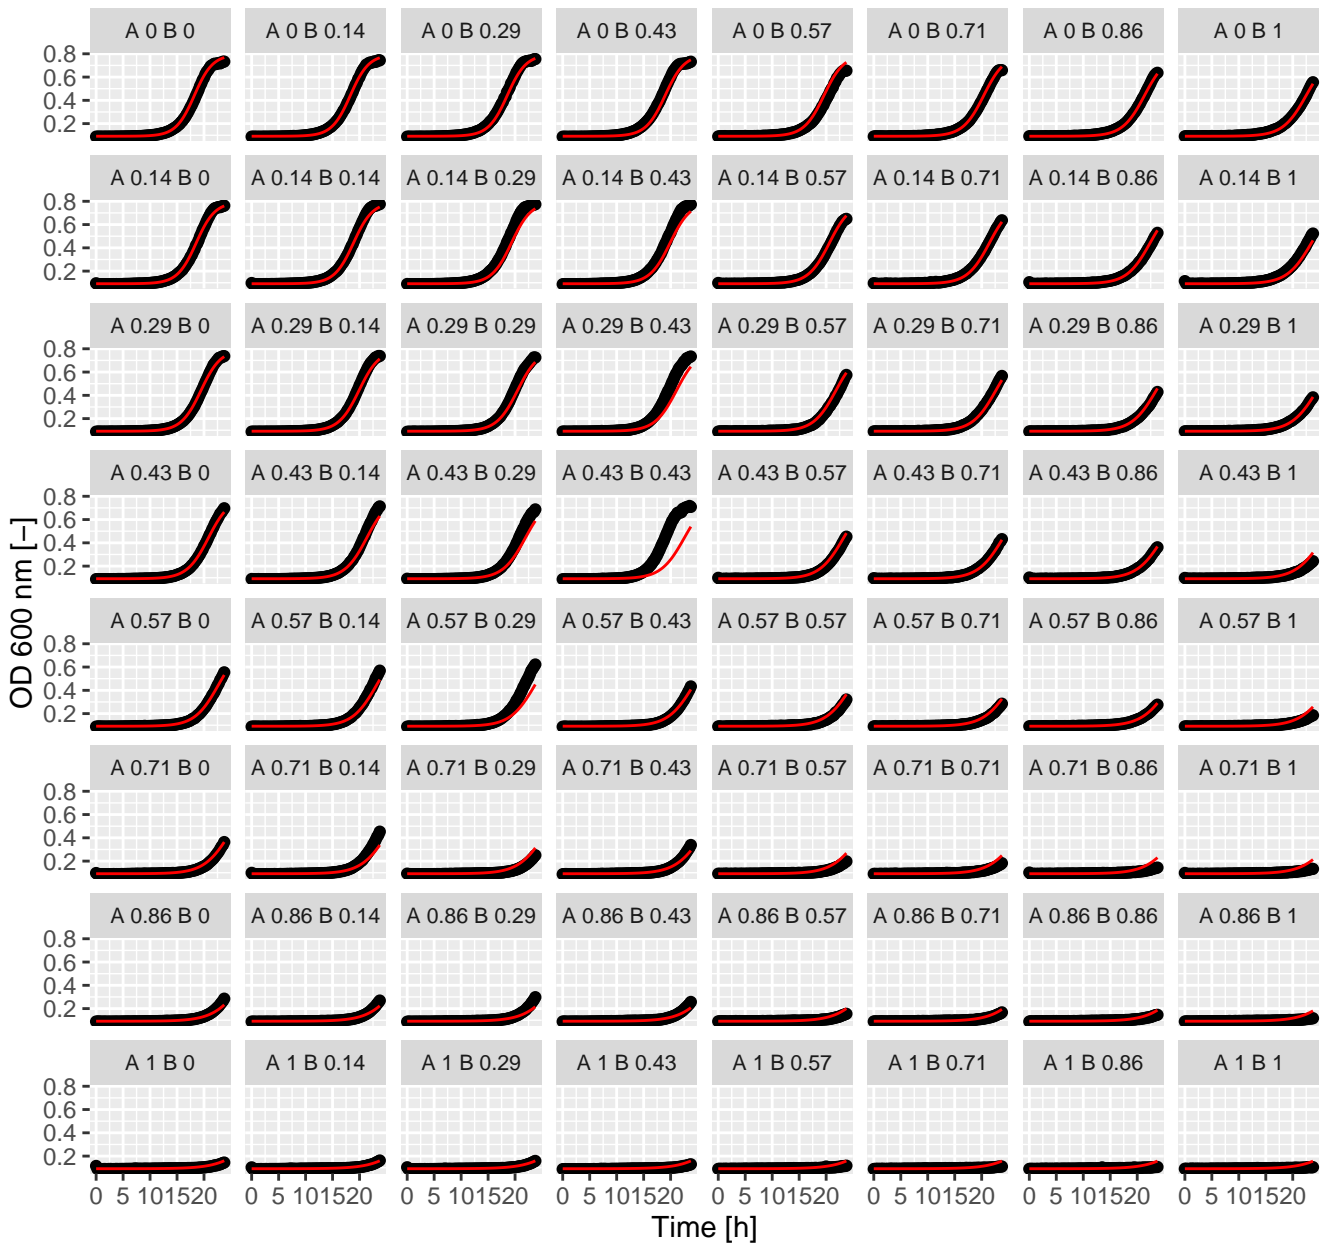

Cis.Cis (= Ax.Bx) Greco  
 $\alpha = -0.38$

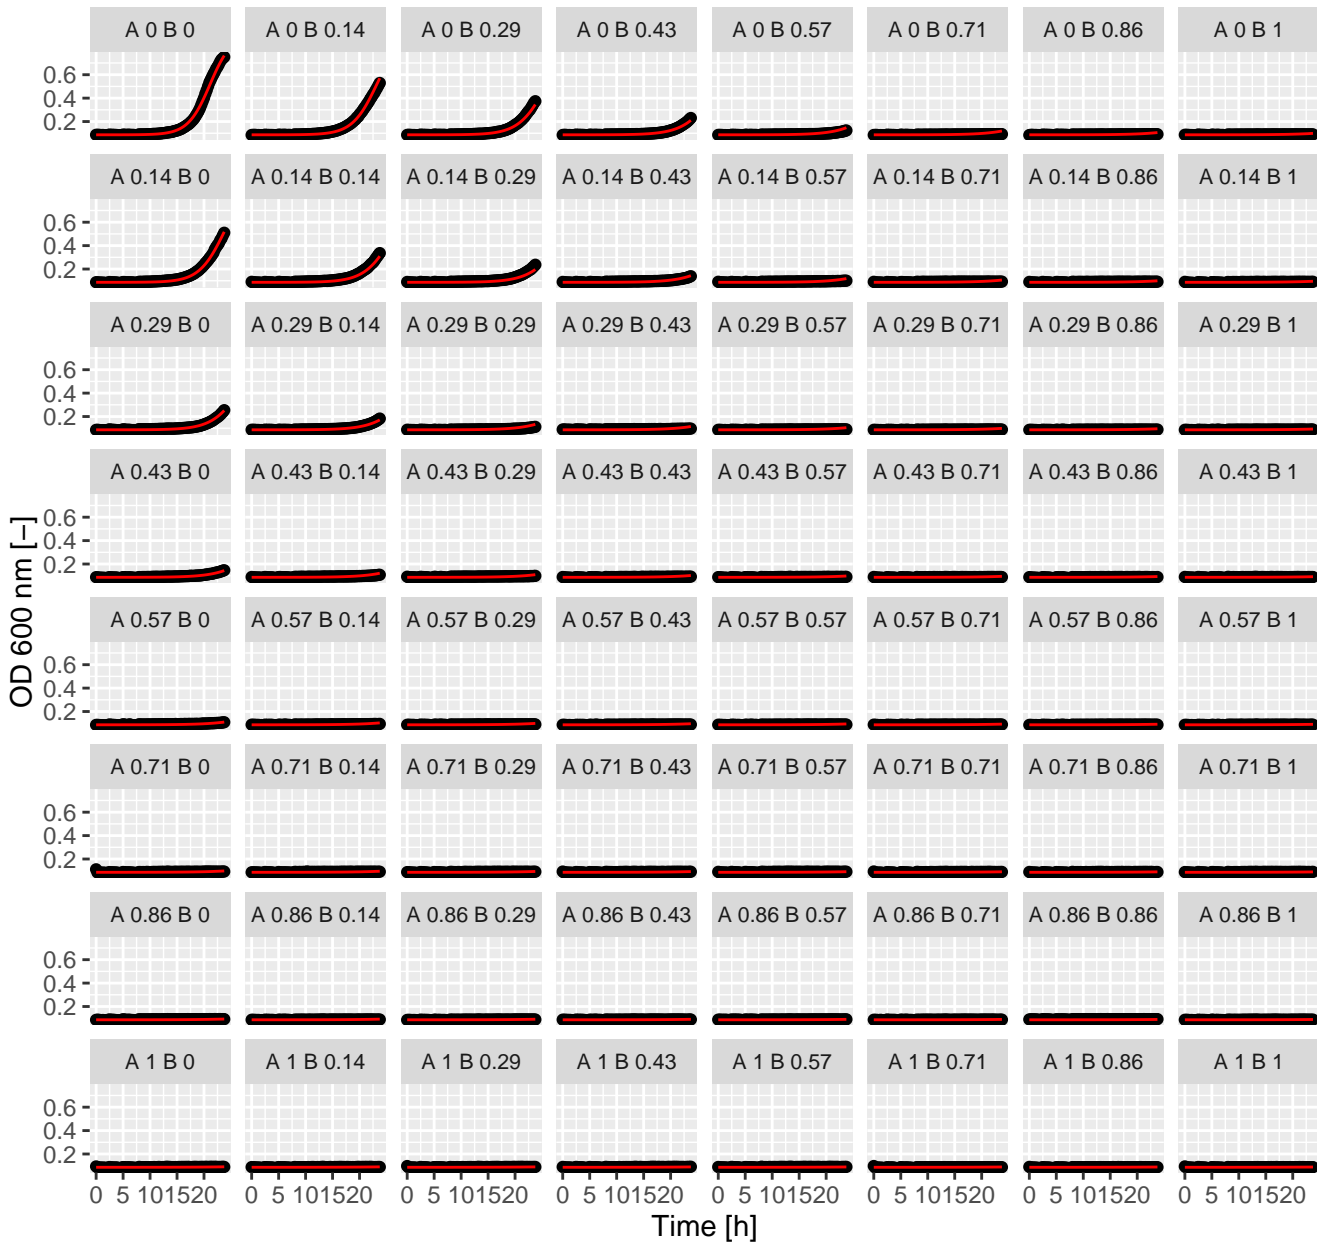

Chl.Ter (= Ax.Bx) Greco  
 $\alpha = -1.06$

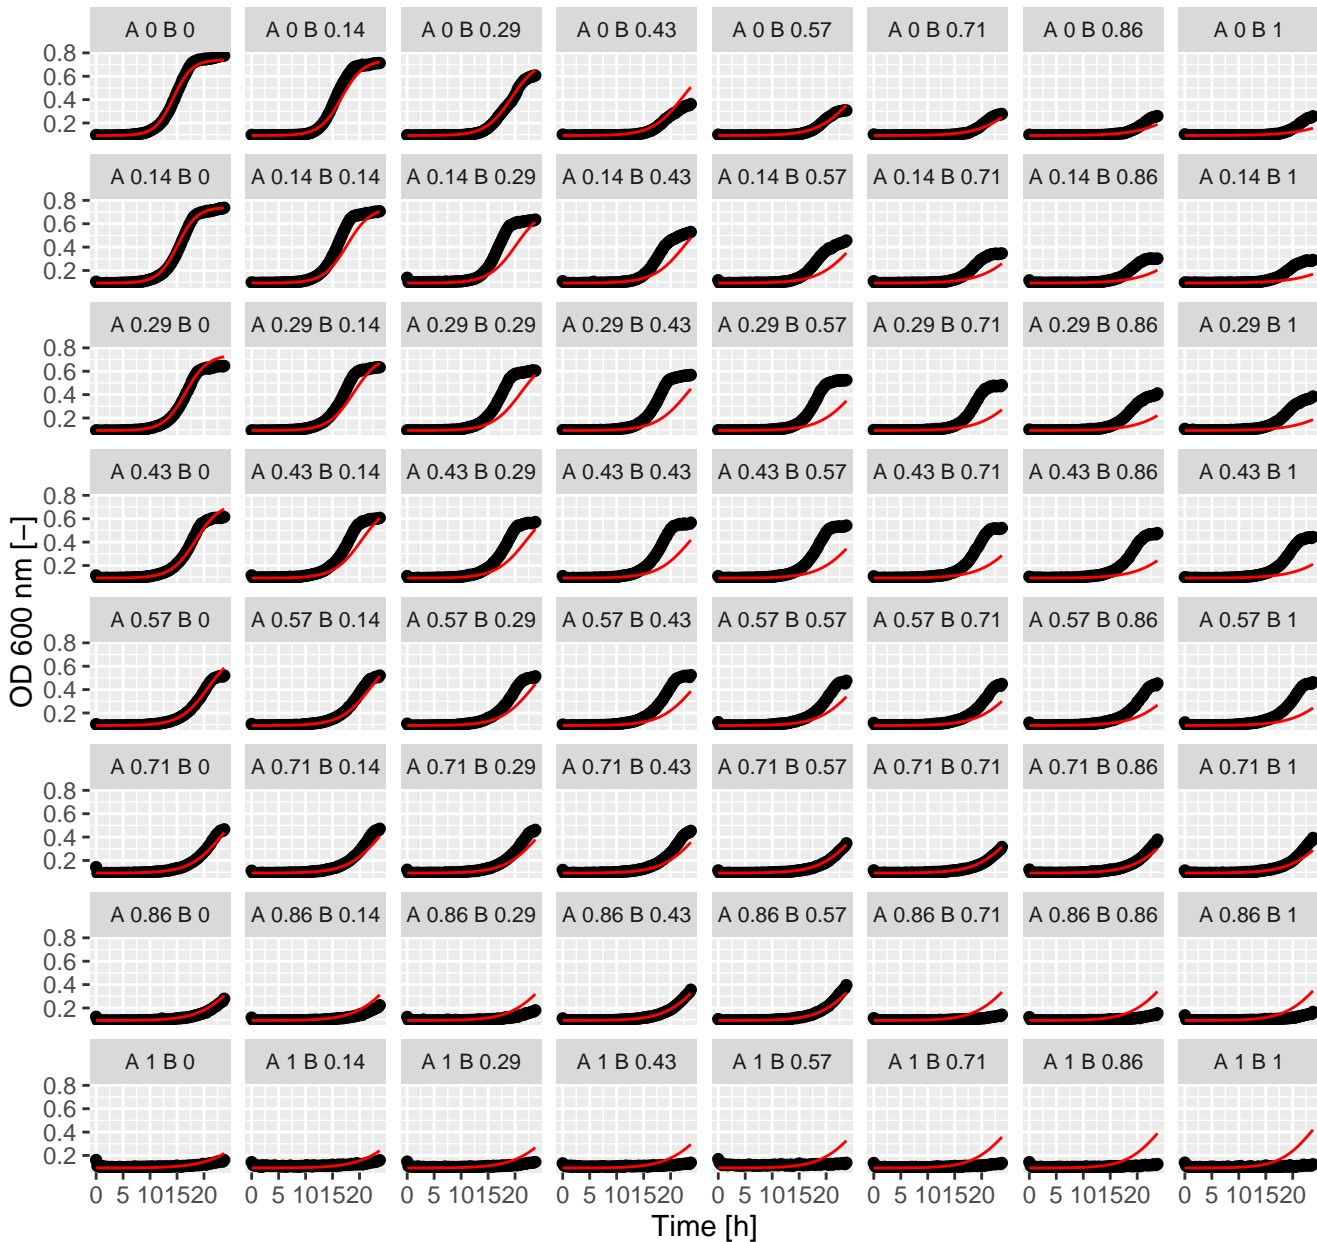

Chl.Tac (= Ax.Bx) Greco  
 $\alpha = -0.63$

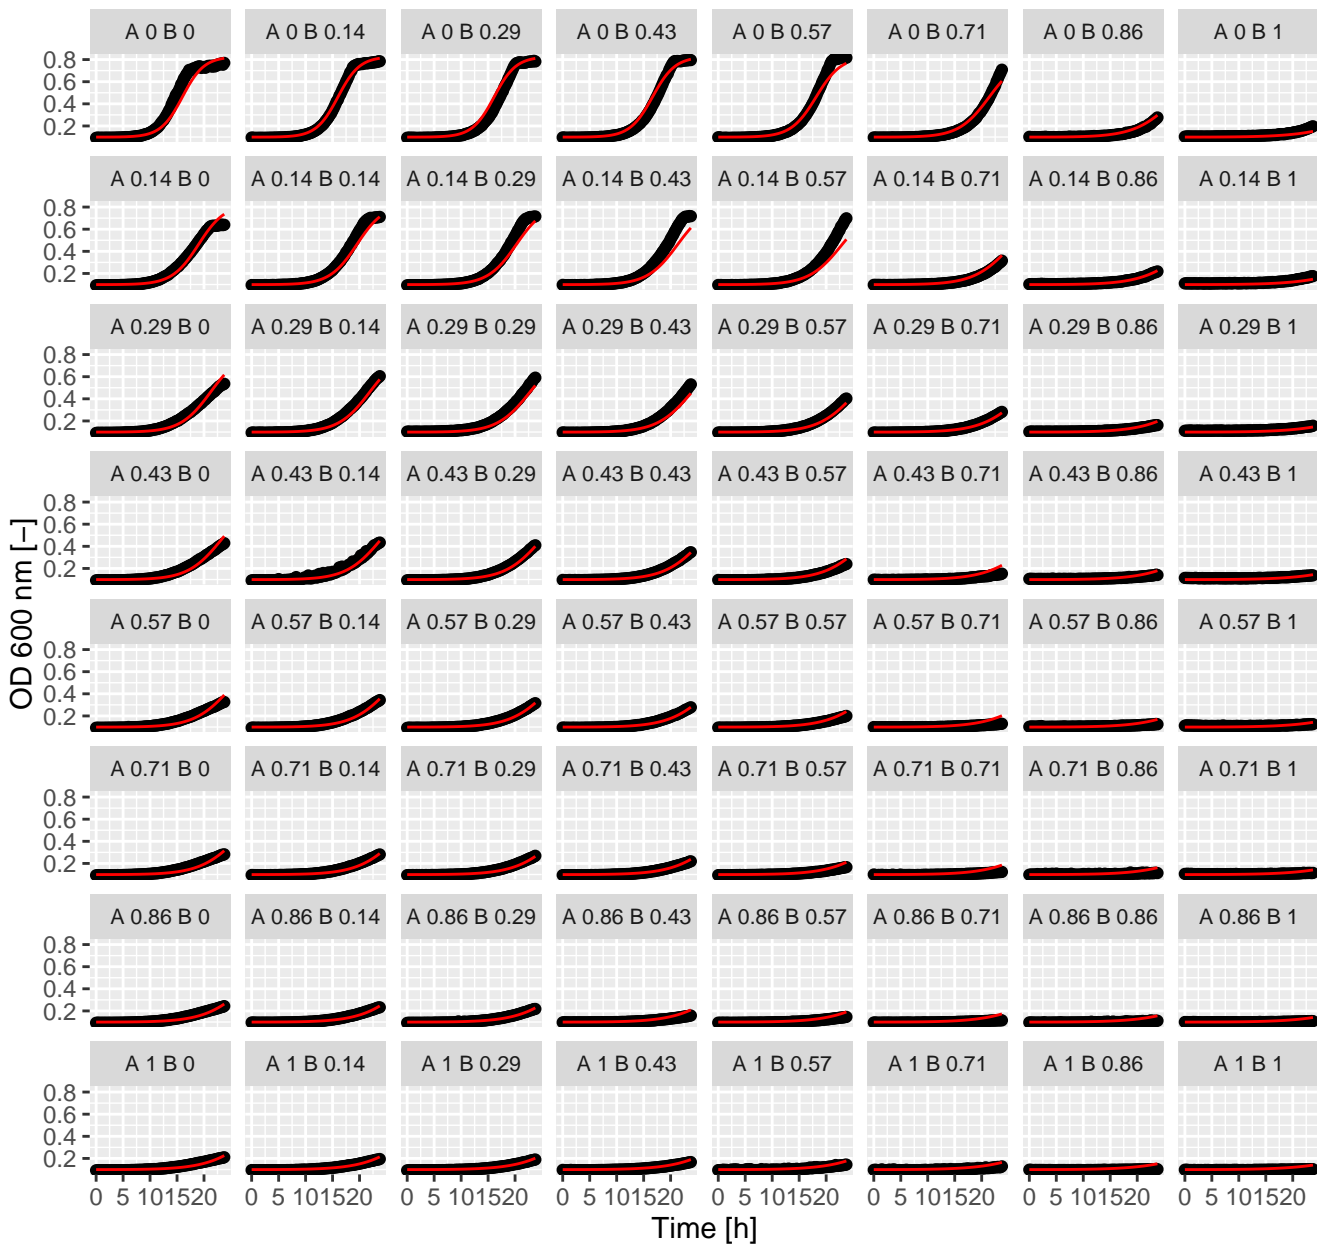

Chl.Sta (= Ax.Bx) Greco  
 $\alpha = -0.92$

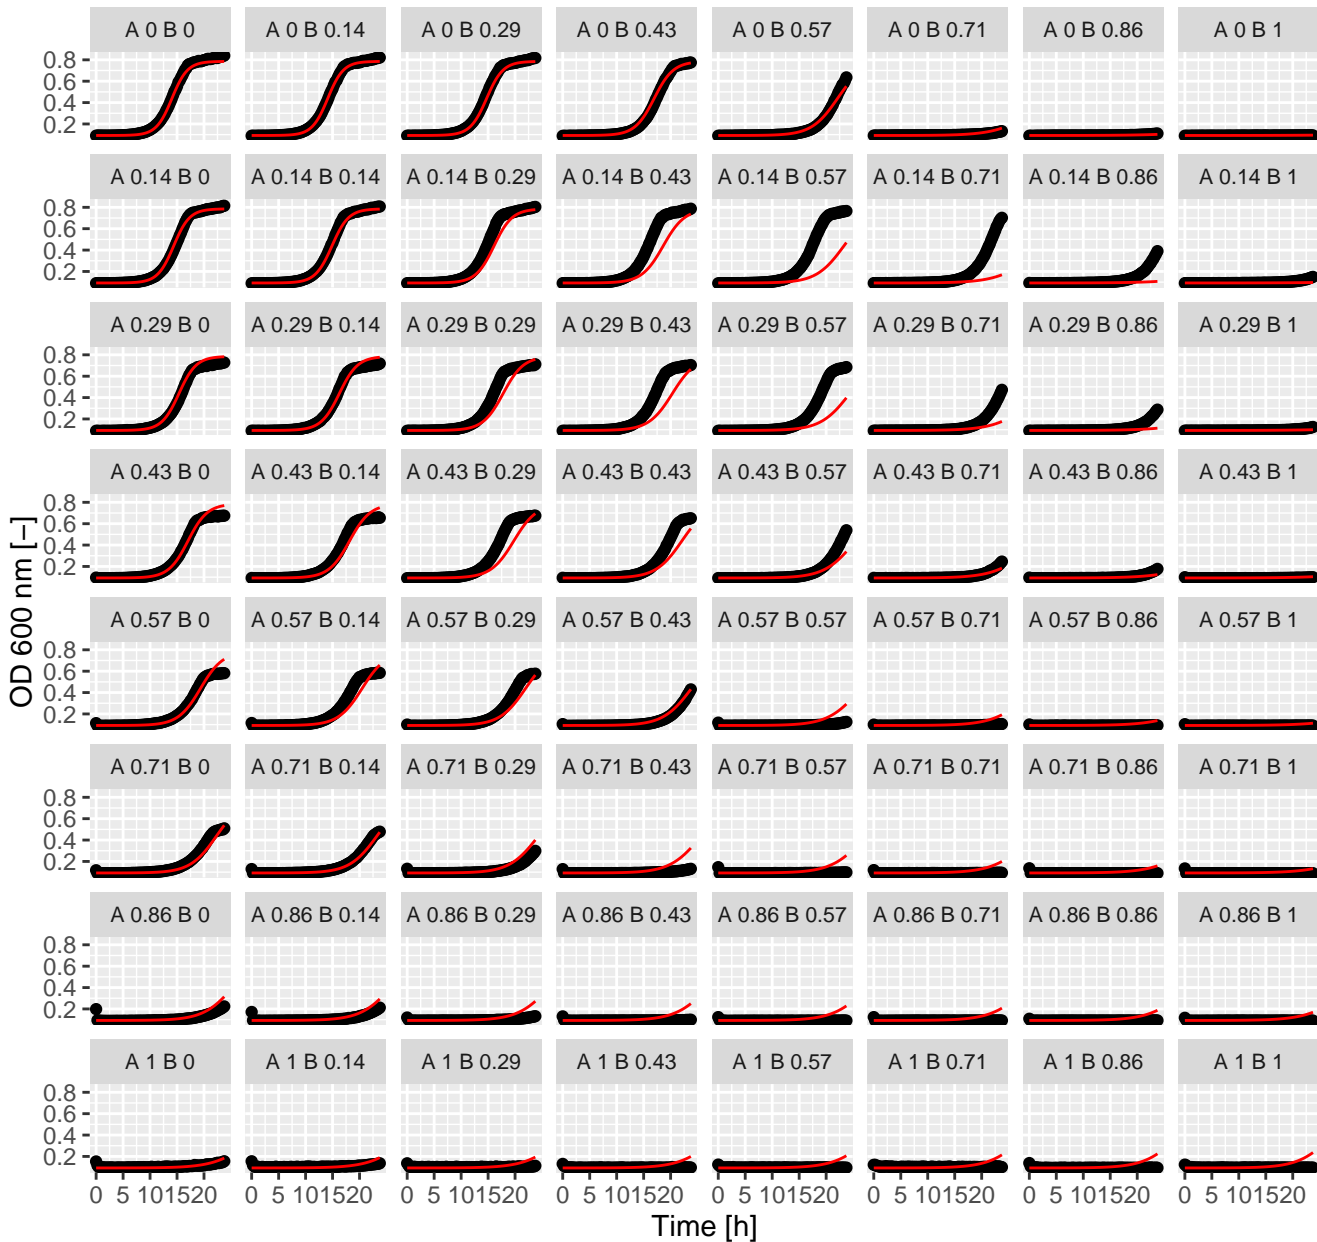

# Chl.Pen (= Ax.Bx) Greco

alpha = -0.7

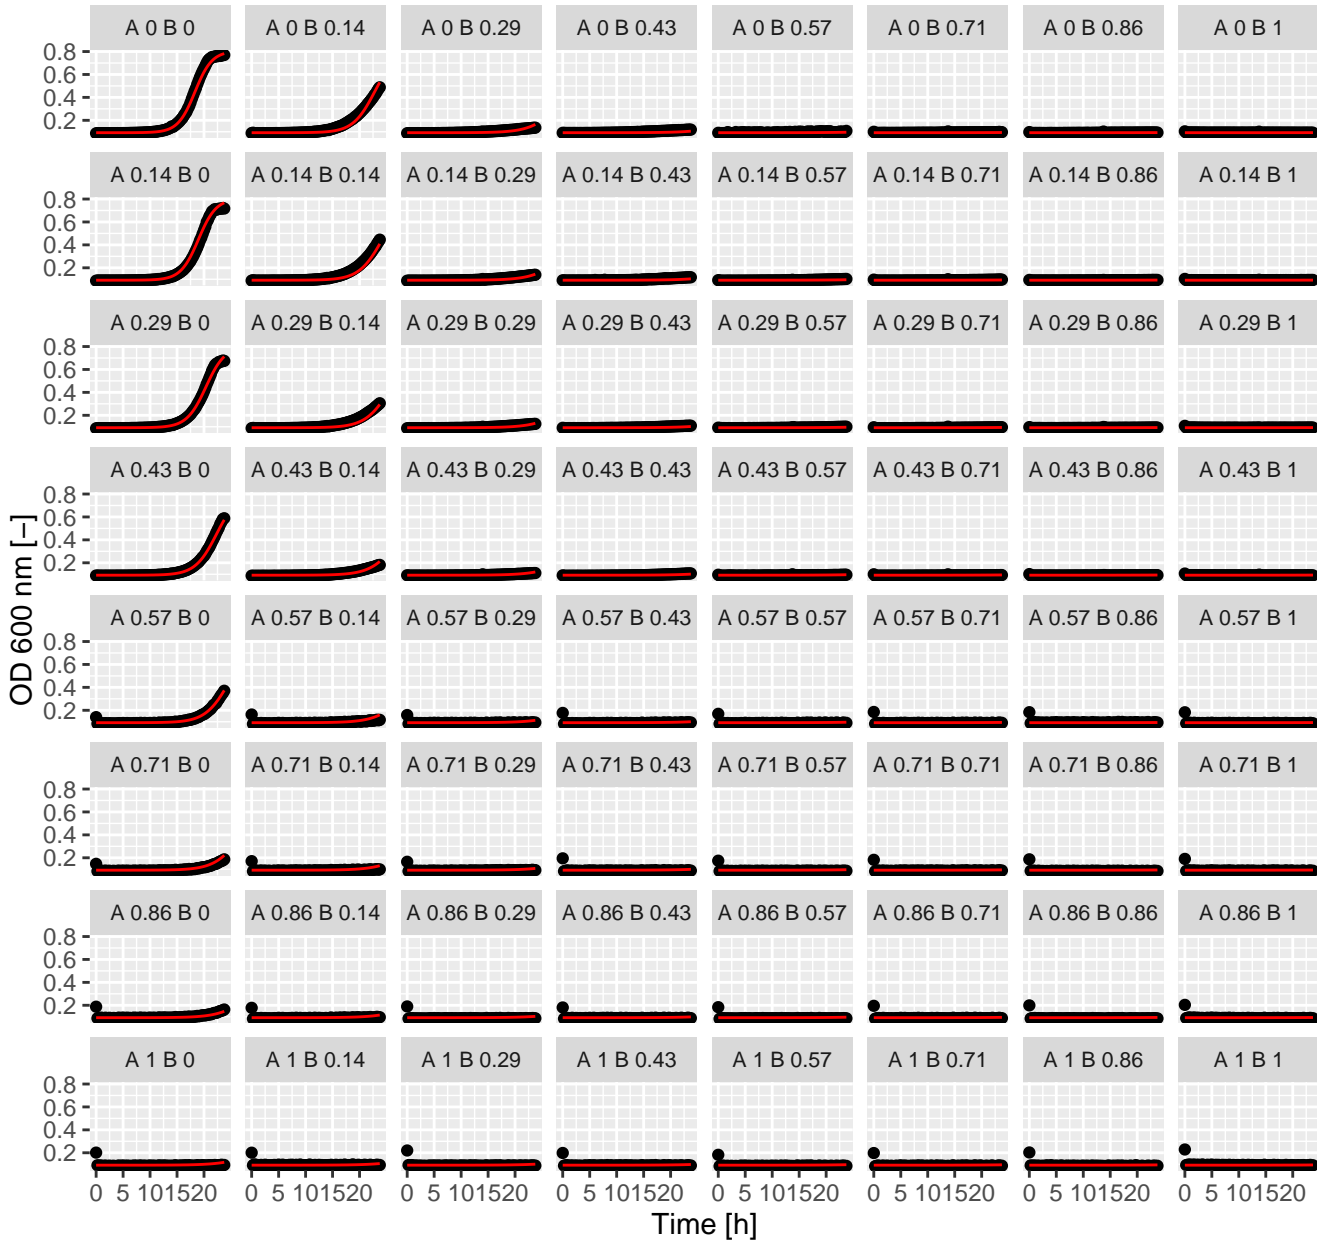



Chl.Lat (= Ax.Bx) Greco  
 $\alpha = -1.06$

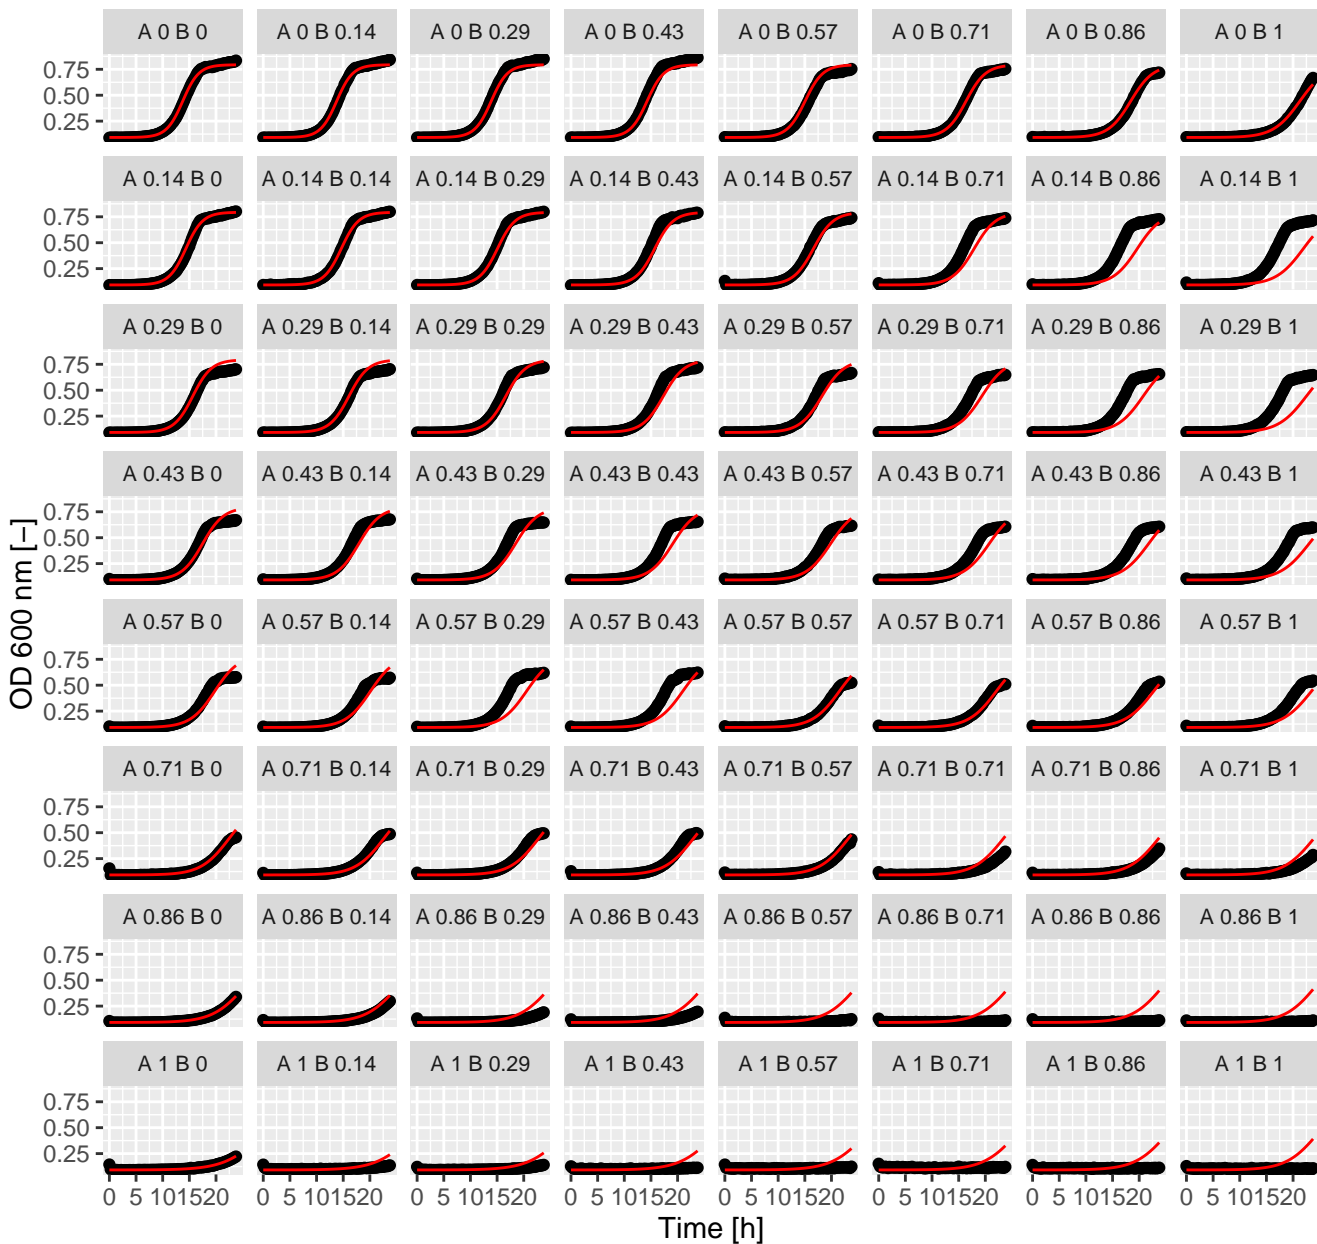

Chl.Chl (= Ax.Bx) Greco  
 $\alpha = -0.45$

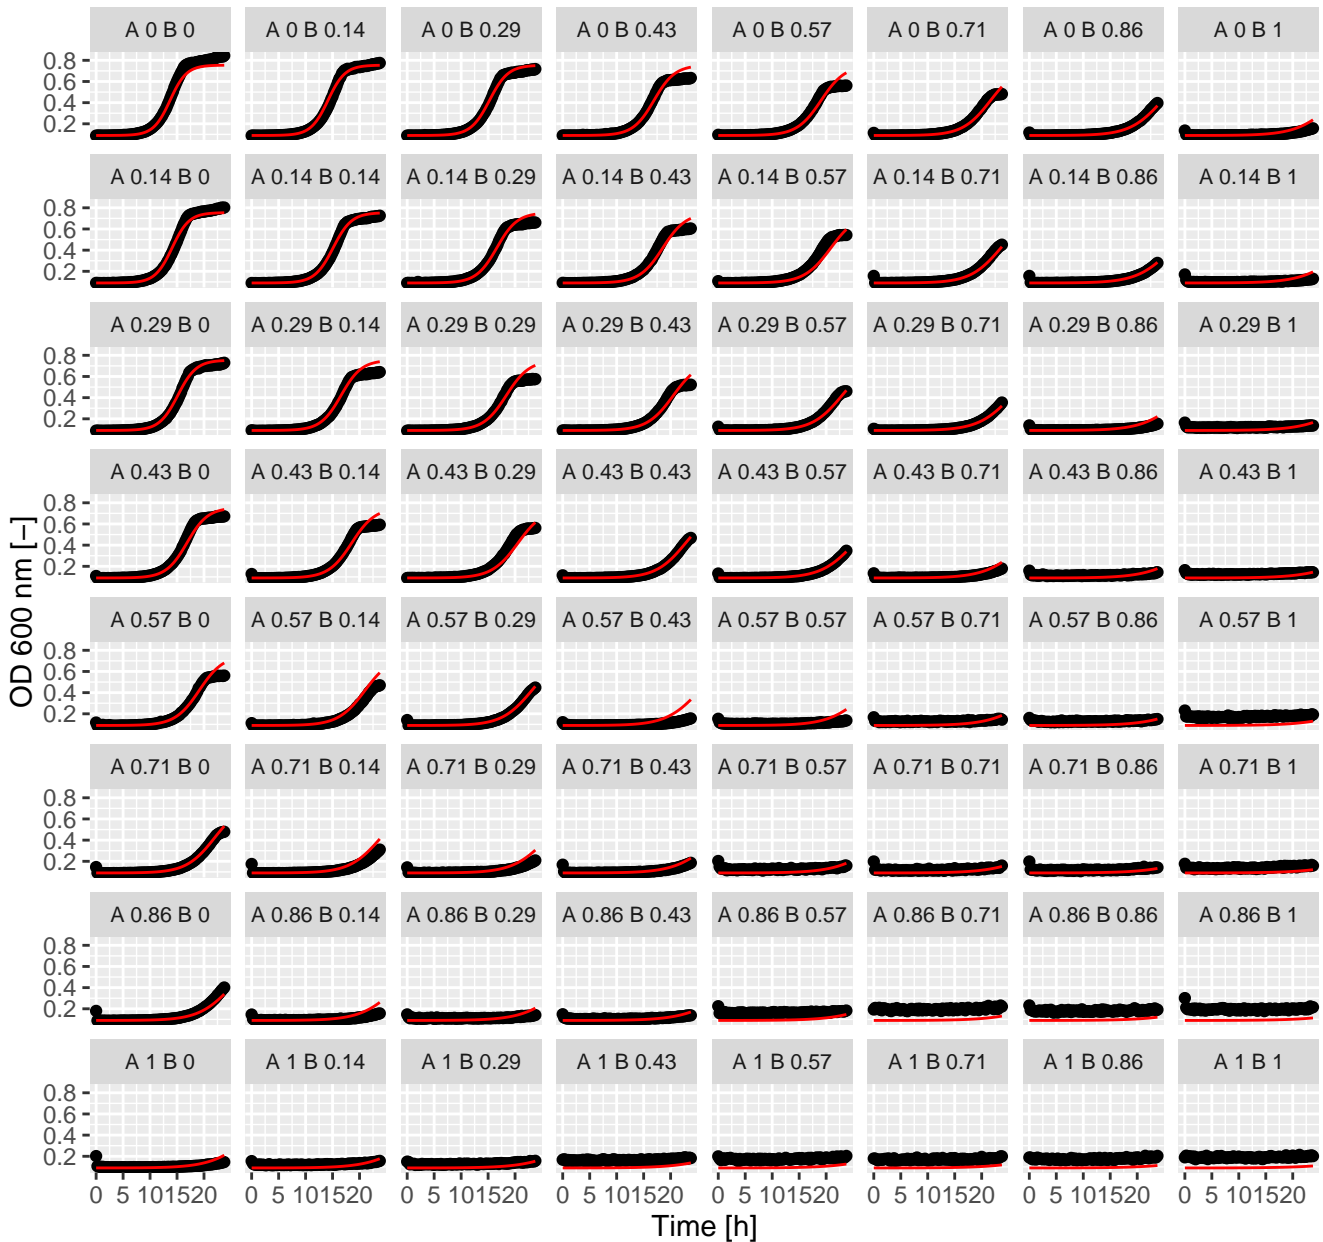

Can.Ter (= Ax.Bx) Greco  
alpha = 0.11

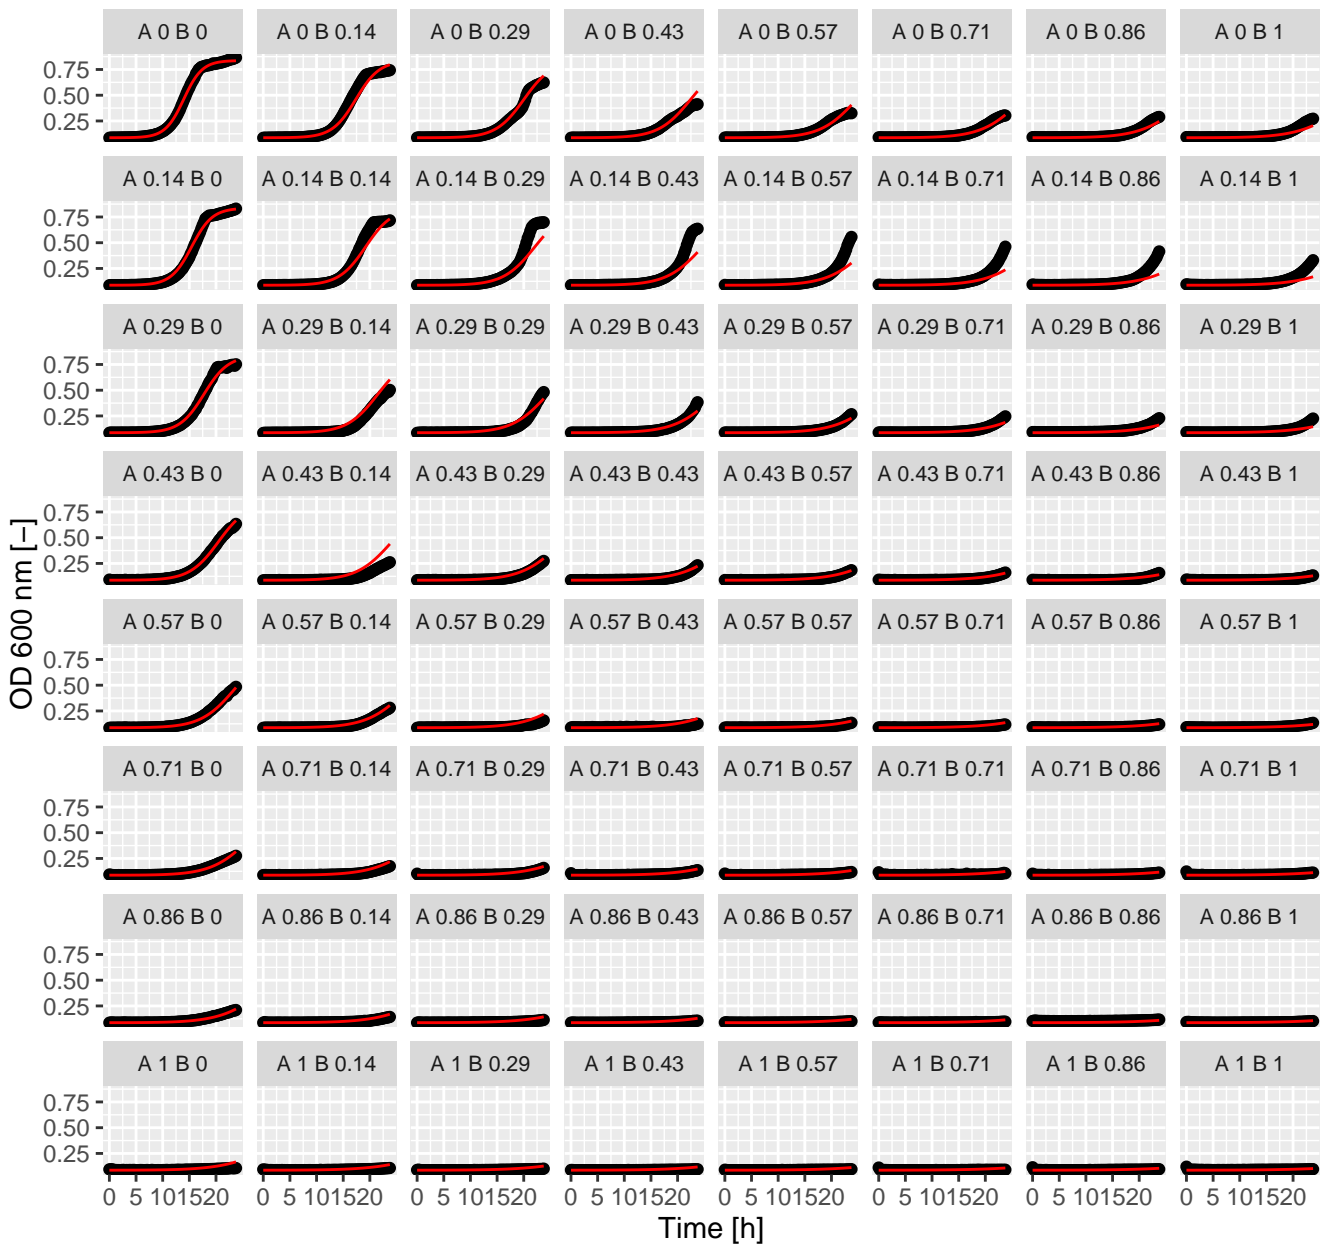

Can.Tac (= Ax.Bx) Greco  
alpha = 5.51

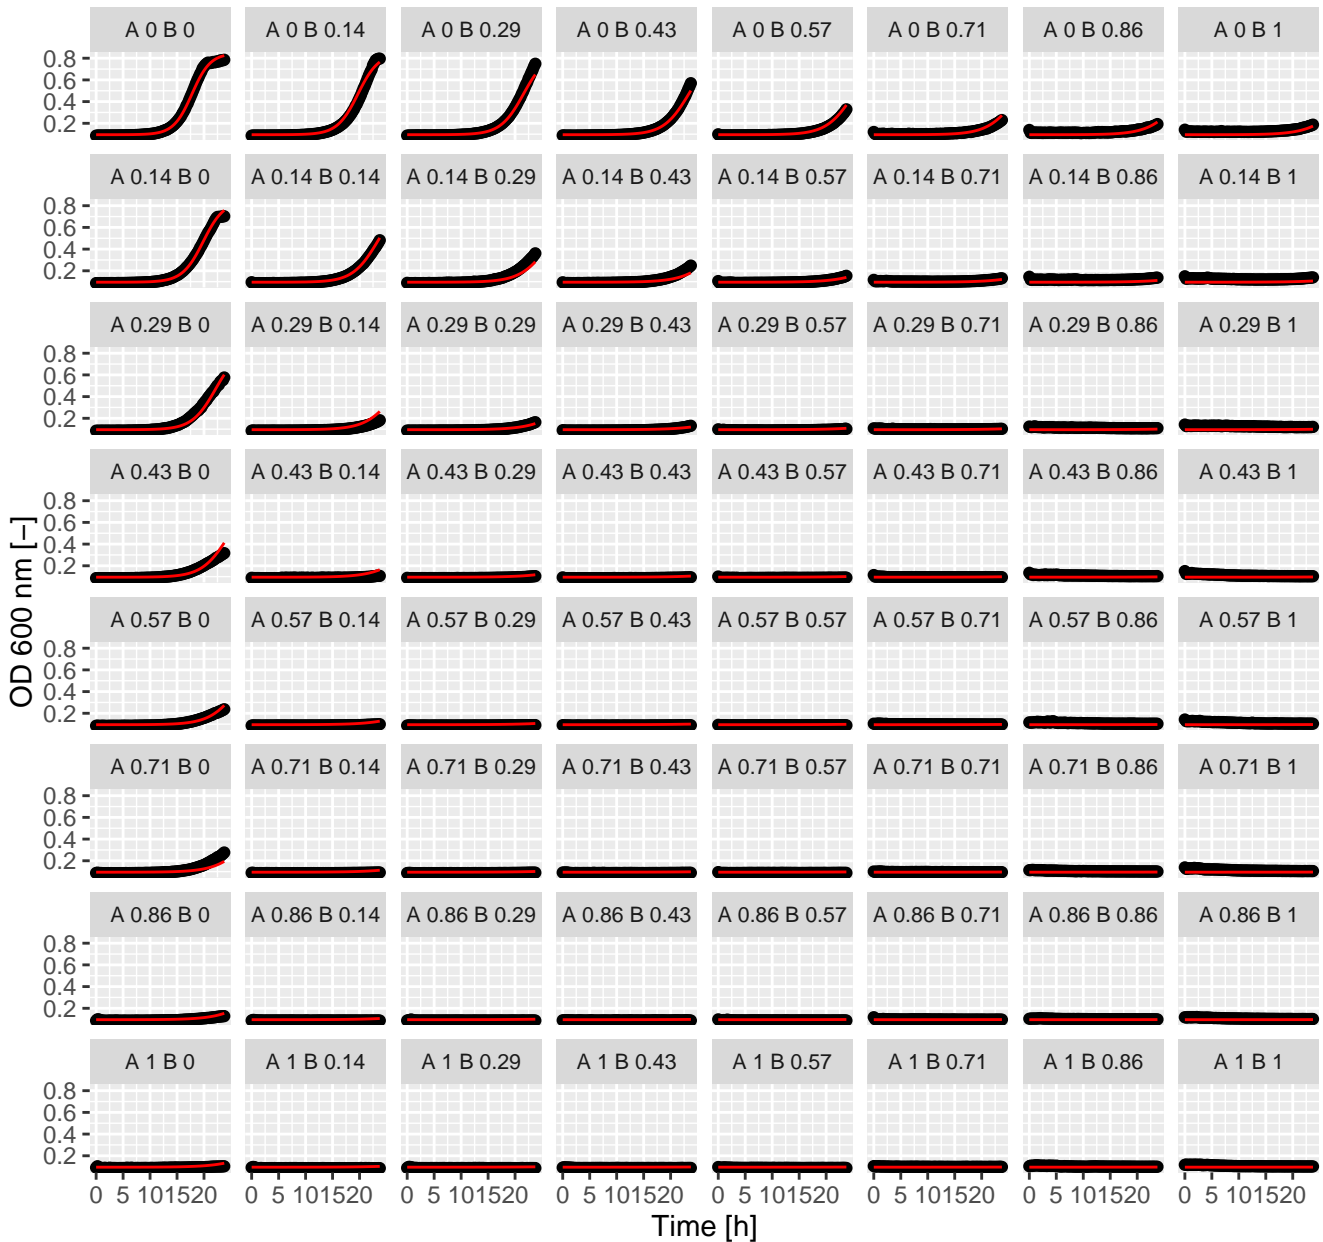

Can.Sta (= Ax.Bx) Greco  
 $\alpha = -1.19$

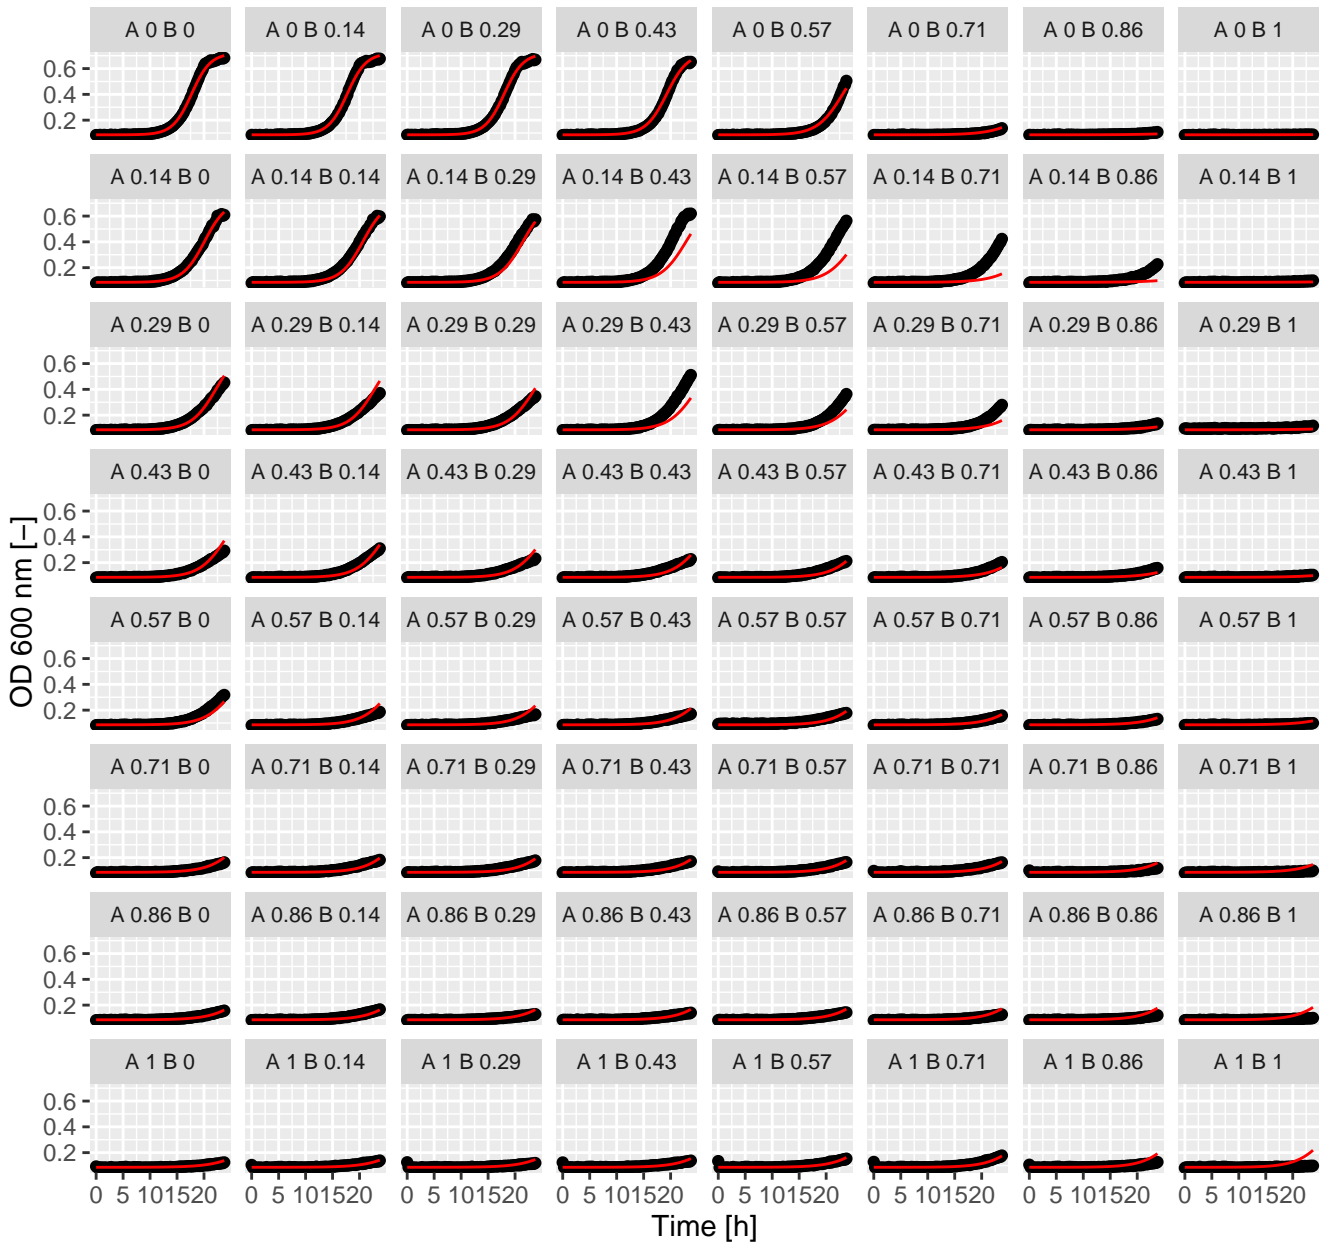

Can.Pen (= Ax.Bx) Greco  
alpha = -0.01

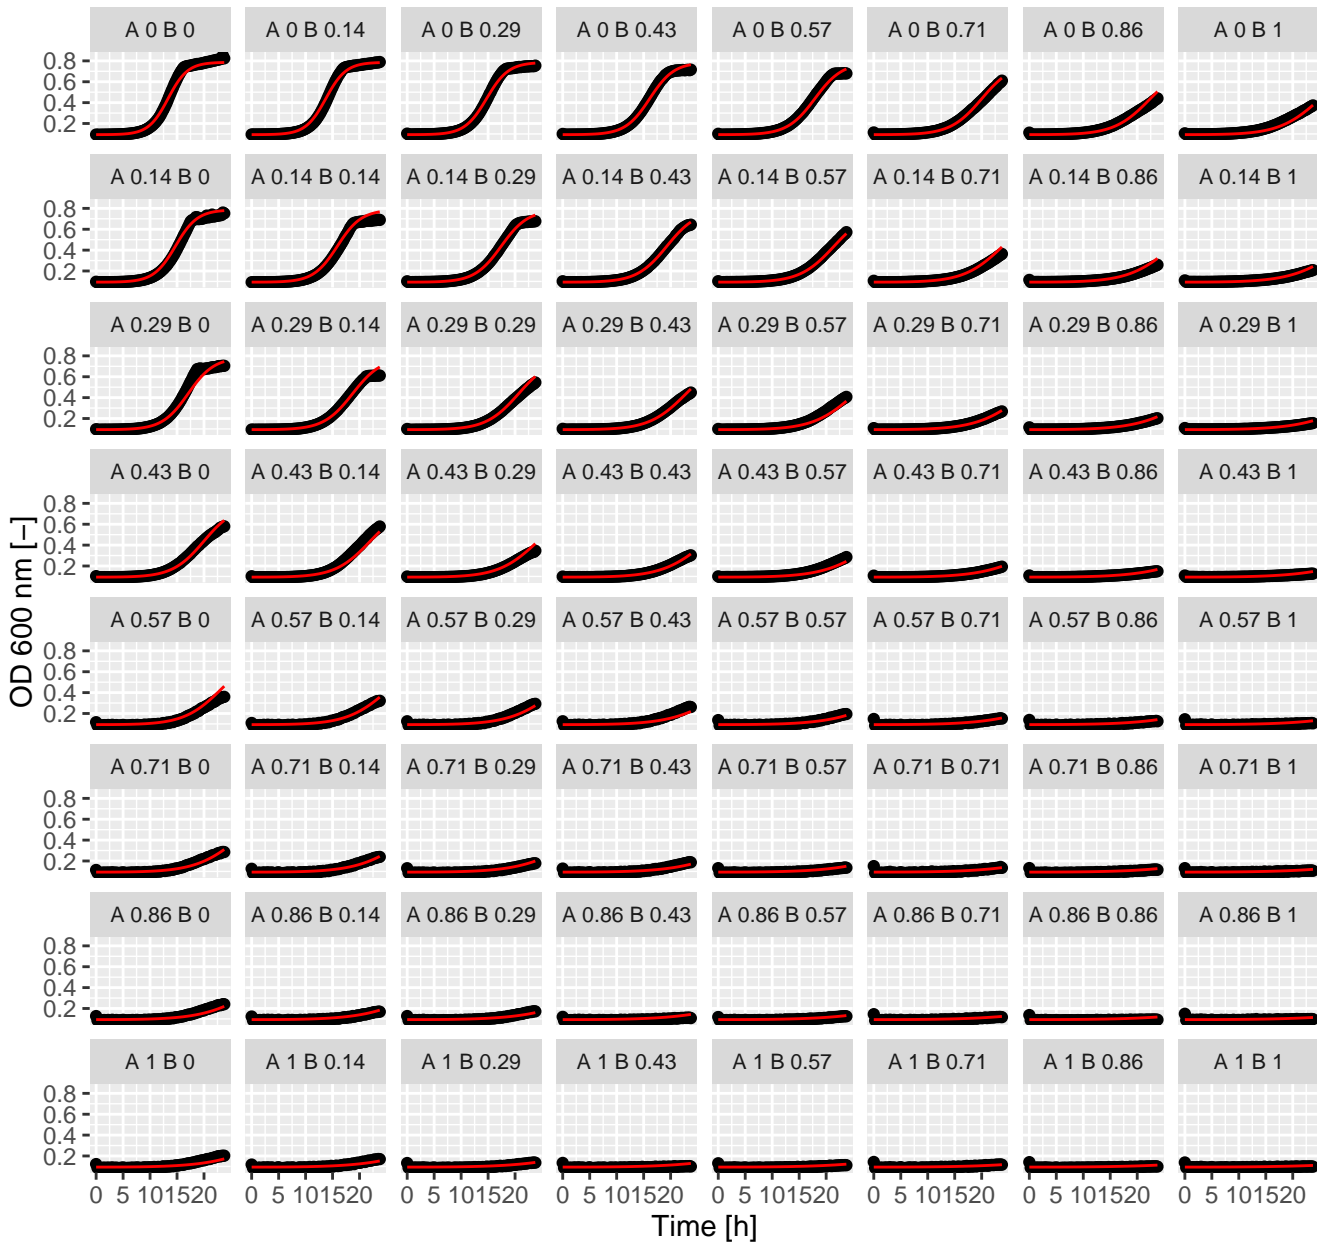

Can.Lat (= Ax.Bx) Greco  
 $\alpha = -1.21$

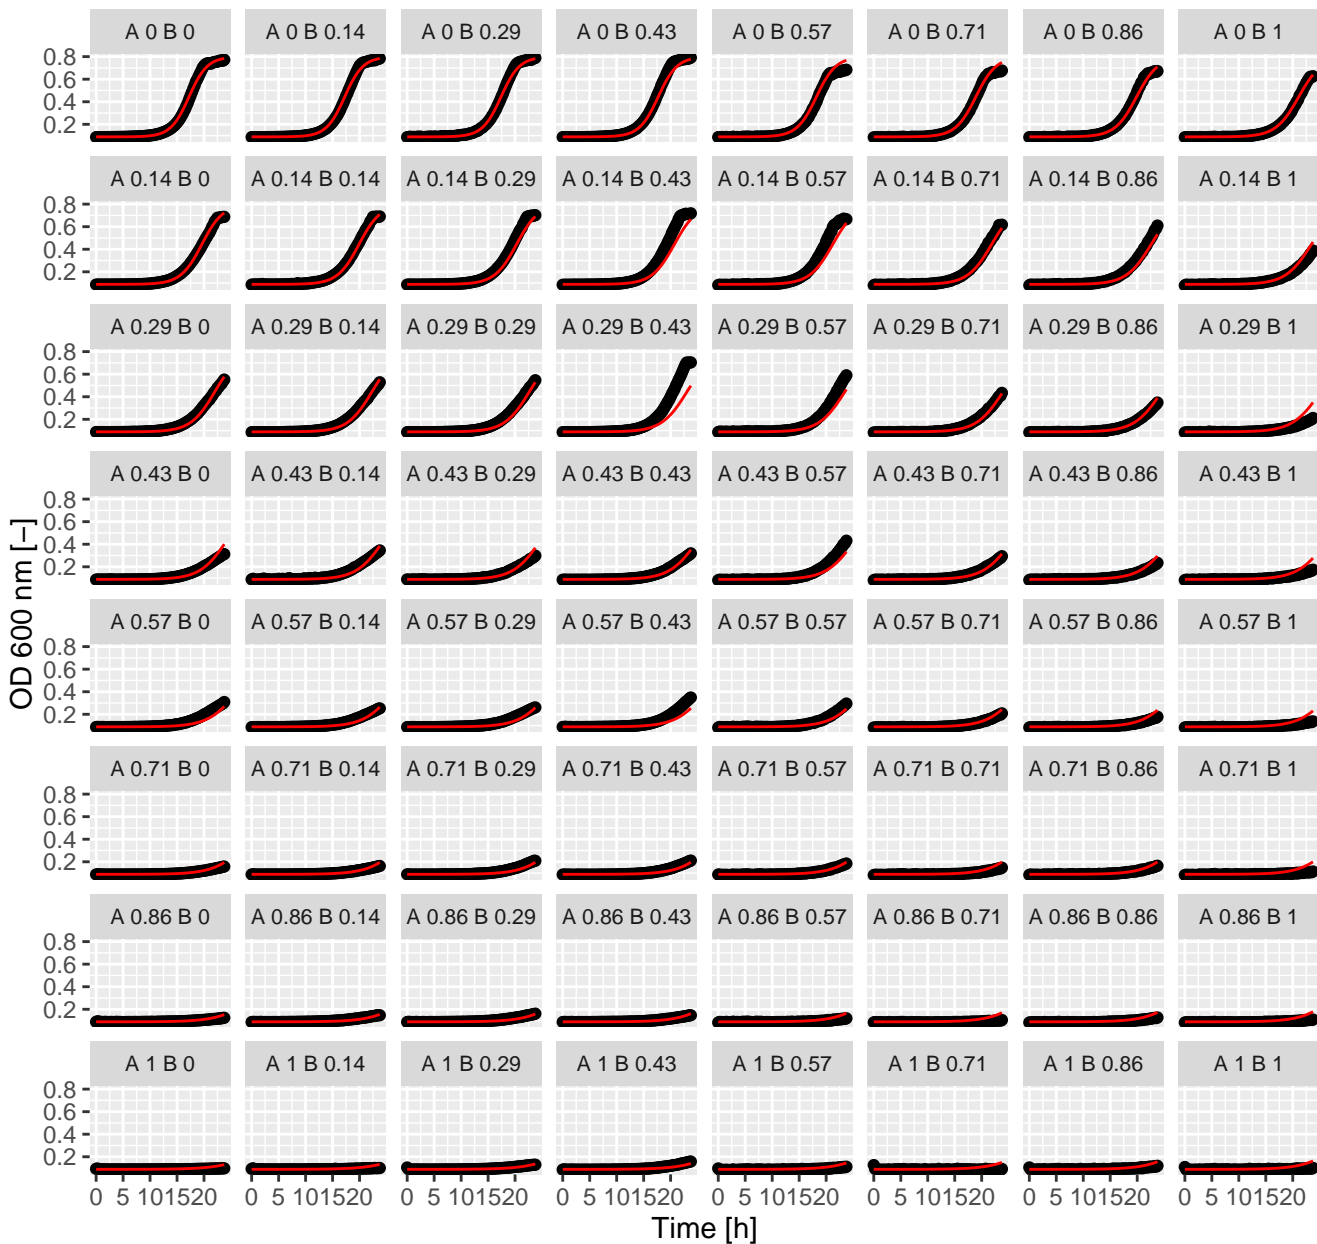

Can.Can (= Ax.Bx) Greco  
 $\alpha = -0.17$

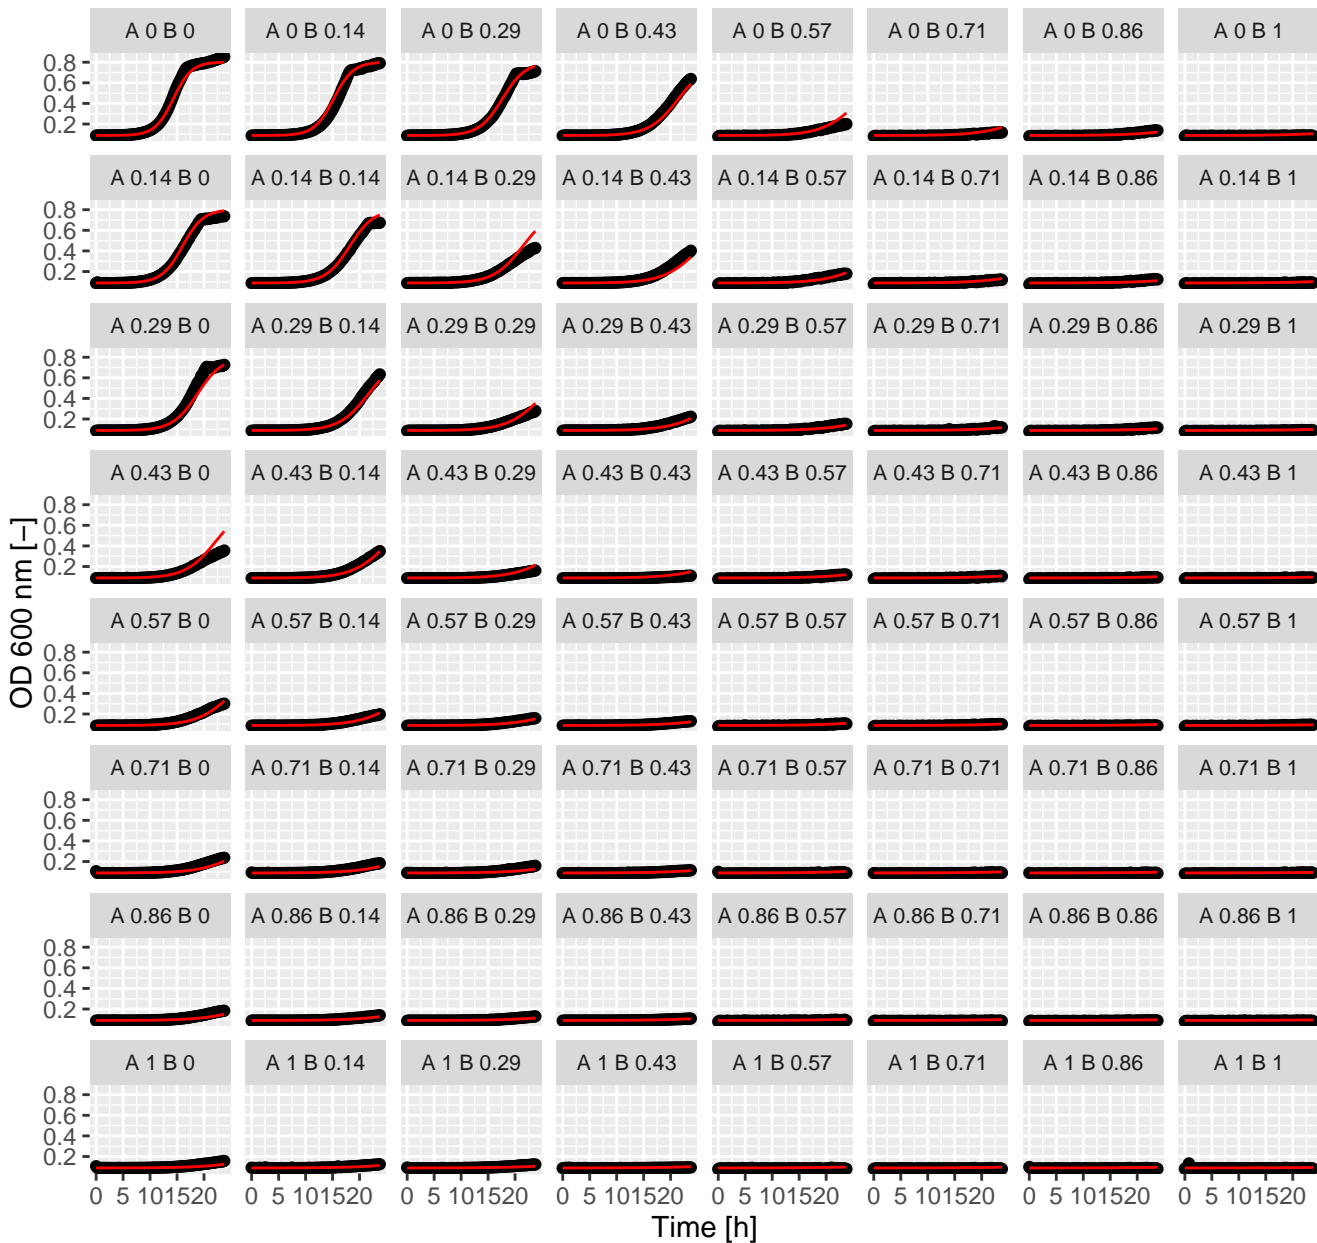



Cal.Tun (= Ax.Bx) Greco  
alpha = -0.19

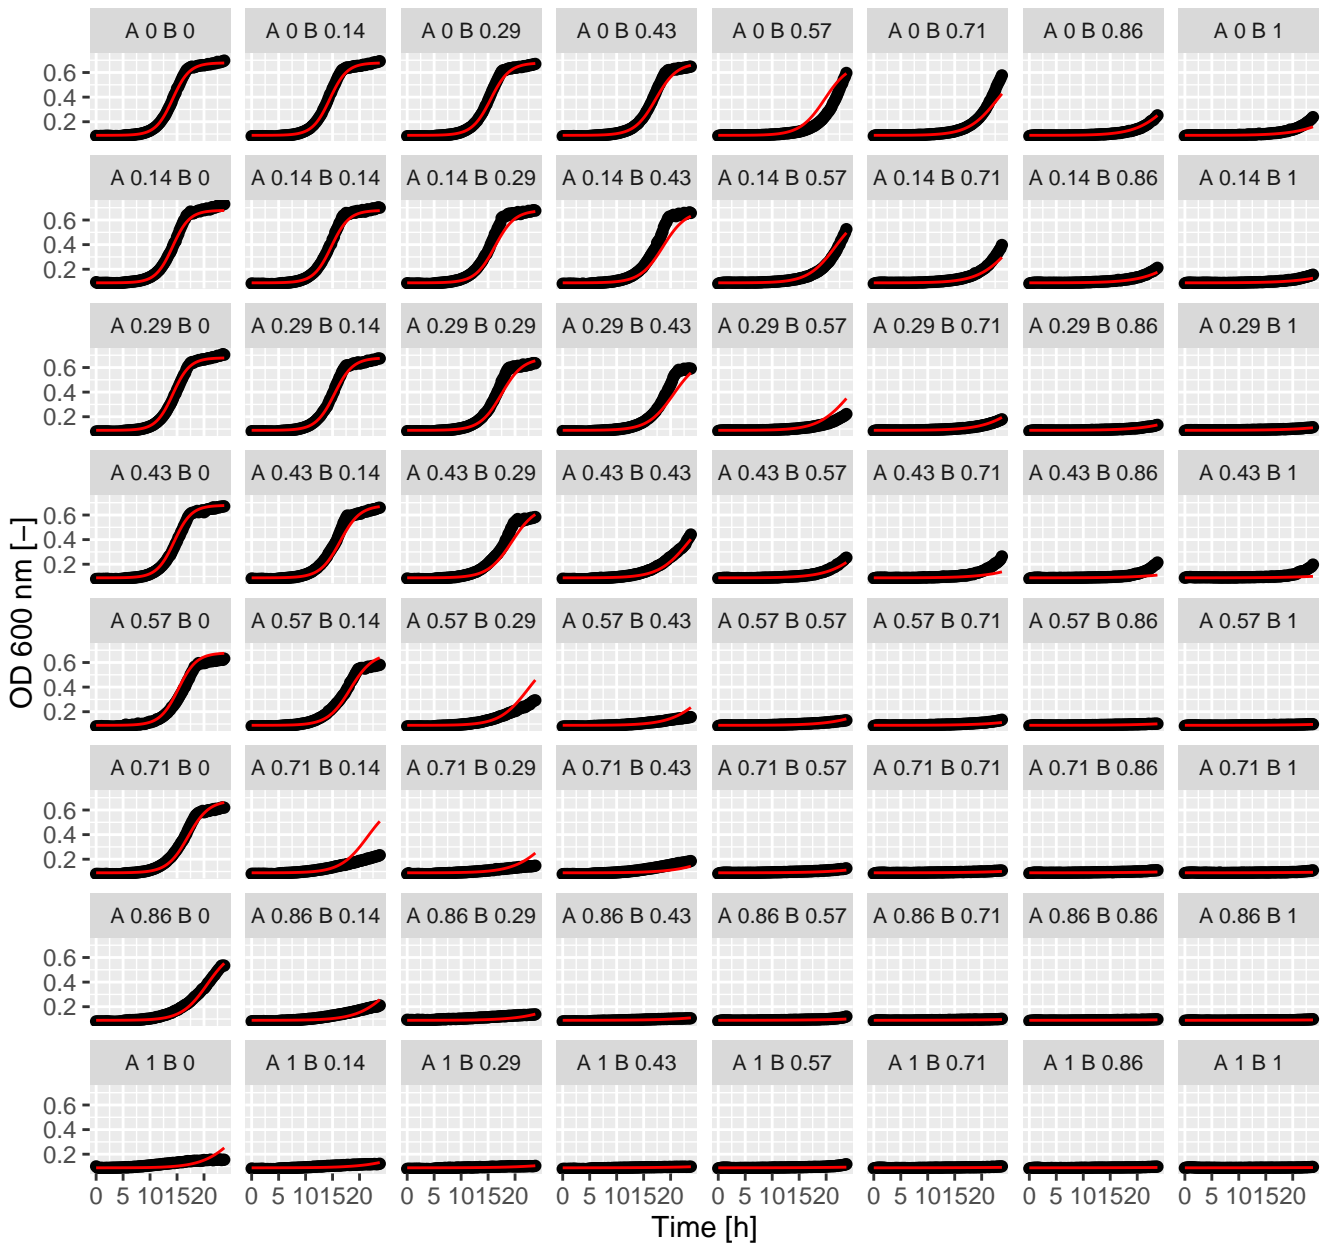

Cal.Ter (= Ax.Bx) Greco  
alpha = 3.21

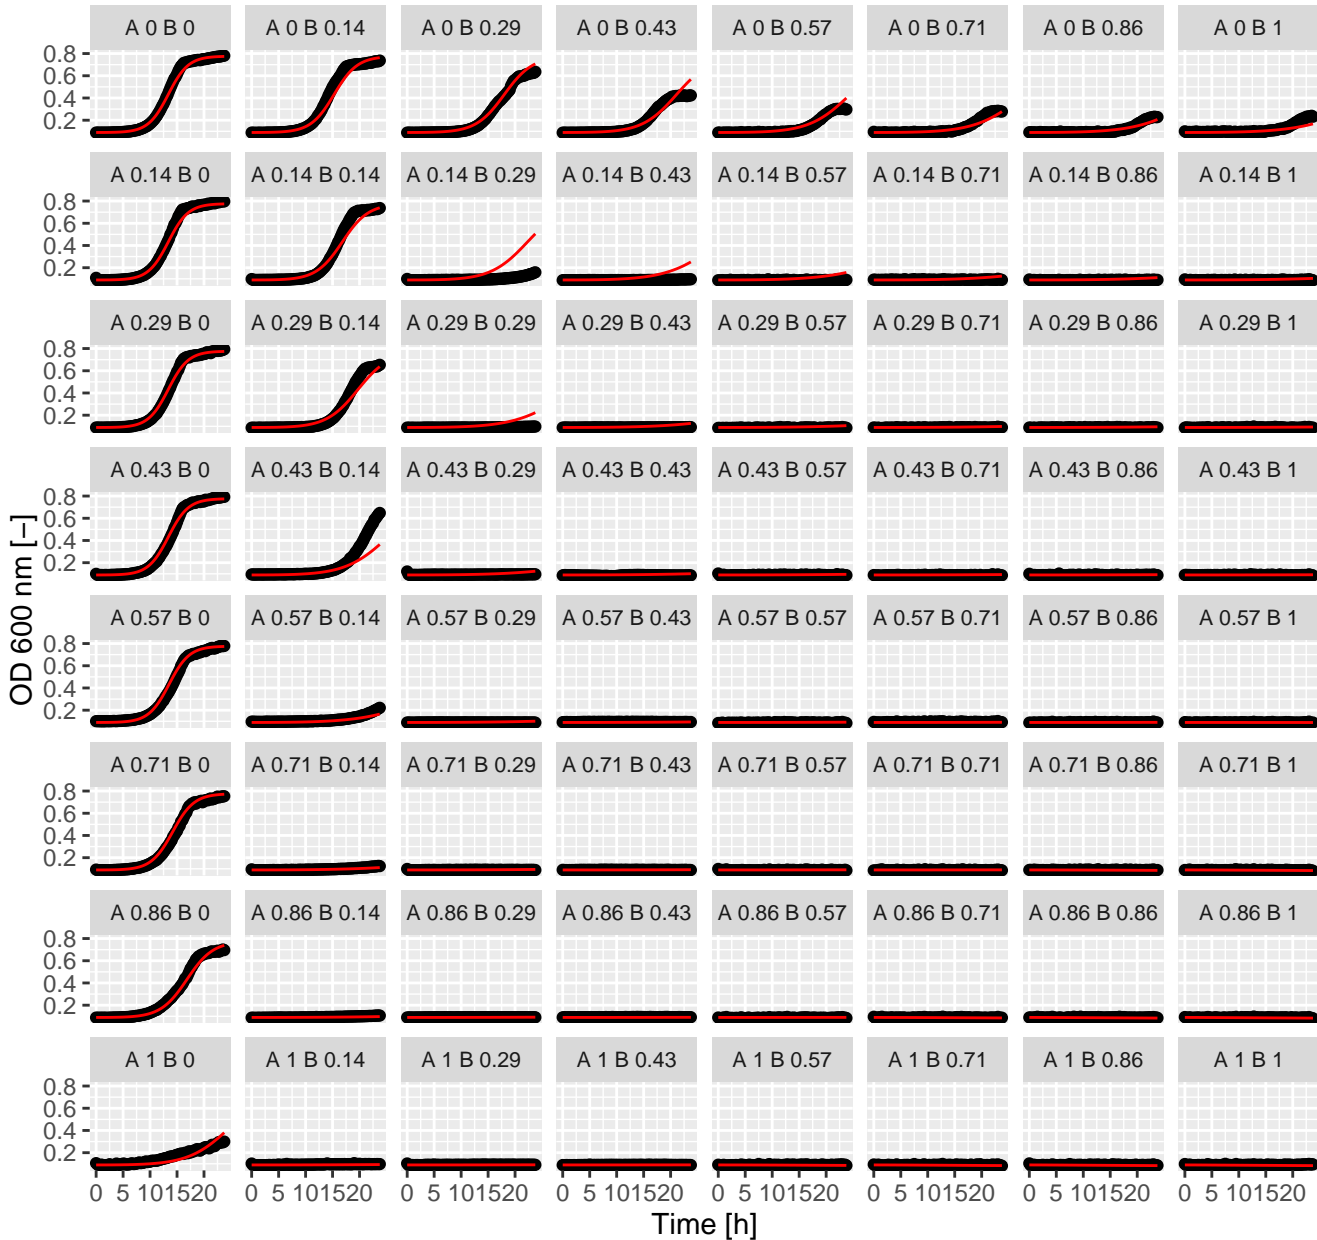

Cal.Tac (= Ax.Bx) Greco  
 $\alpha = -0.45$

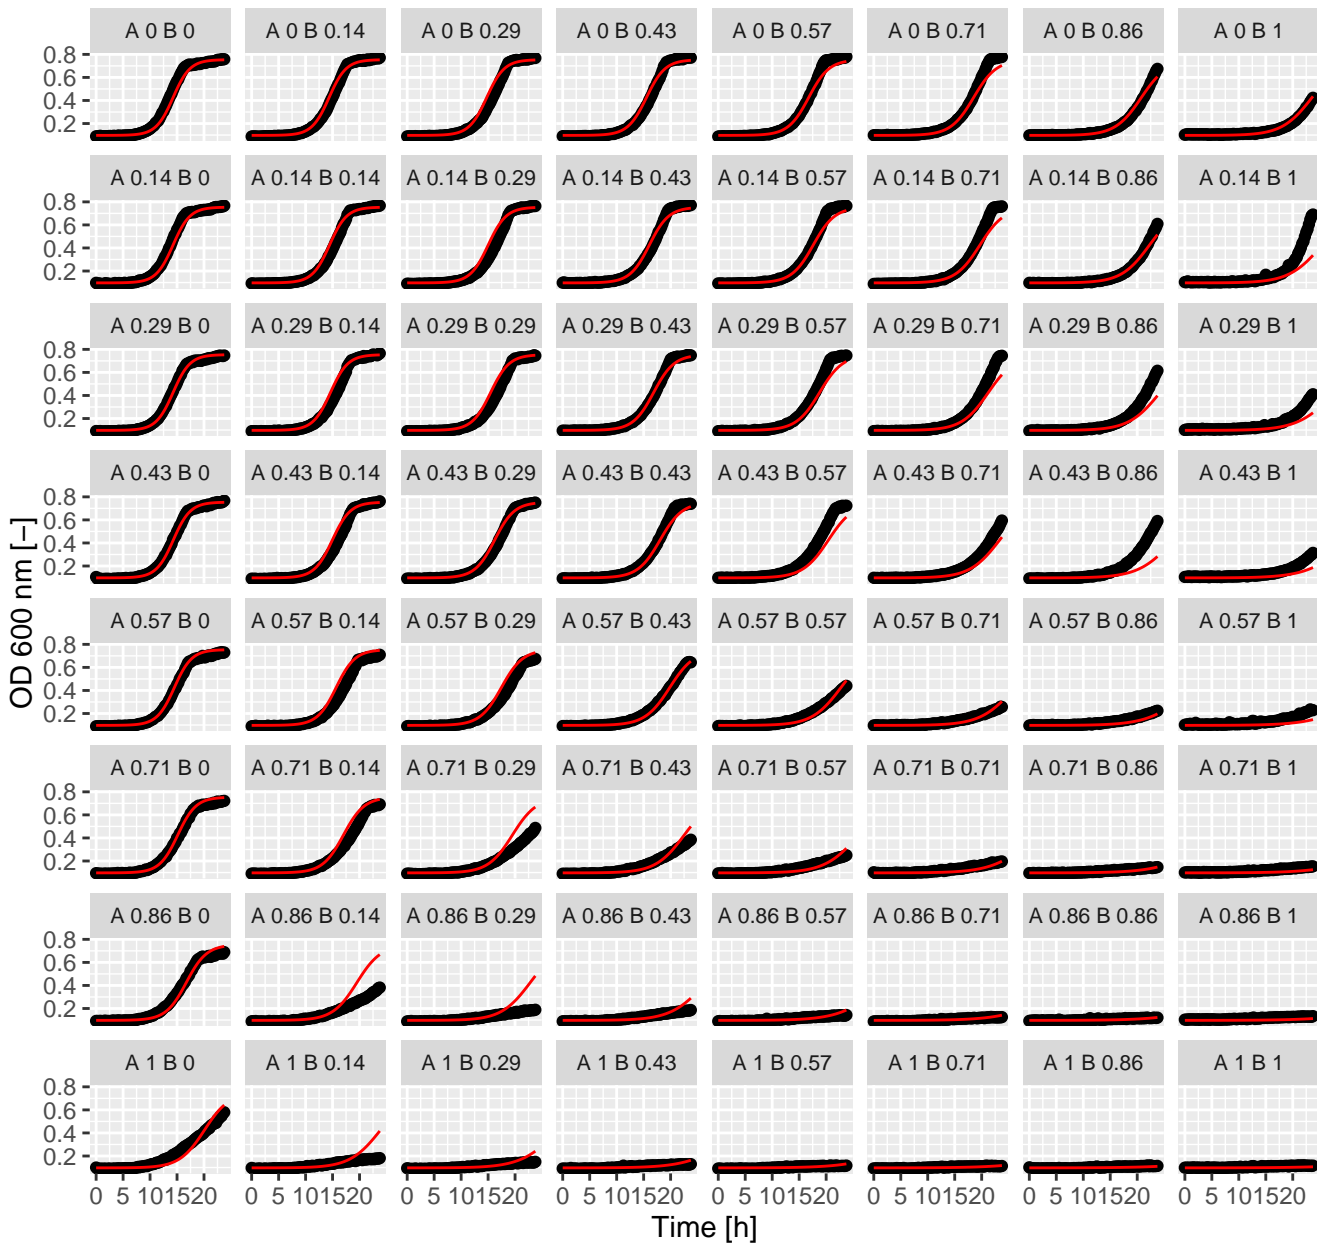

Cal.Sta (= Ax.Bx) Greco  
alpha = -0.9

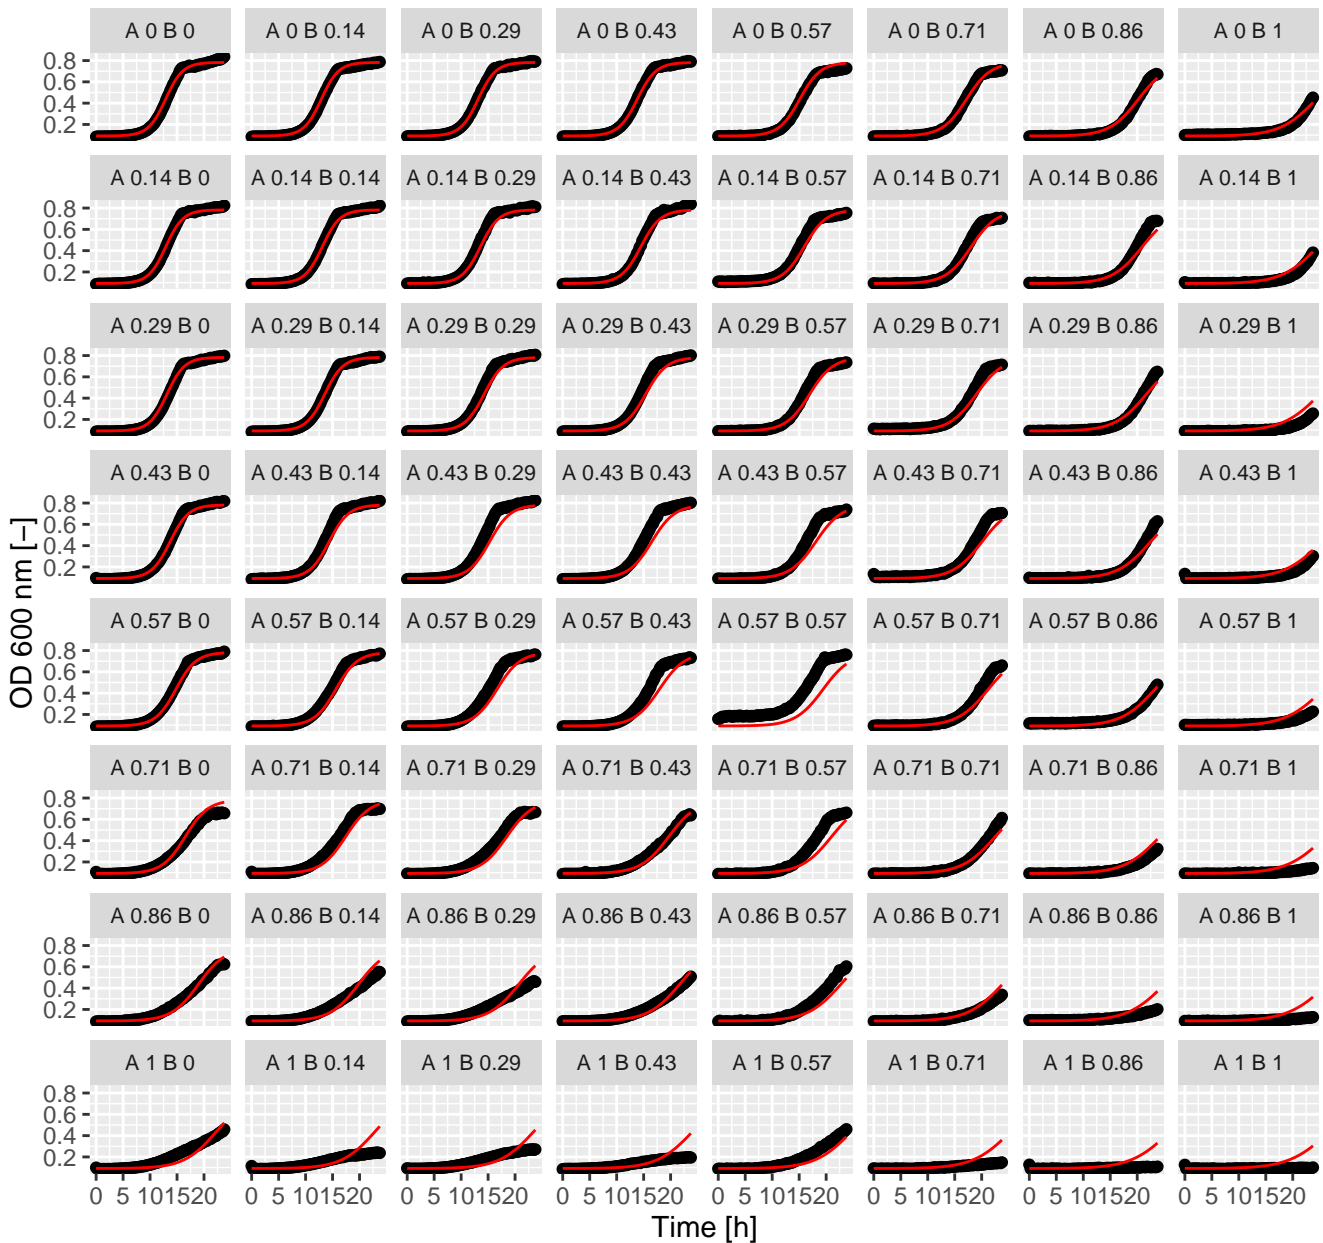

Cal.Rap (= Ax.Bx) Greco  
alpha = -0.98

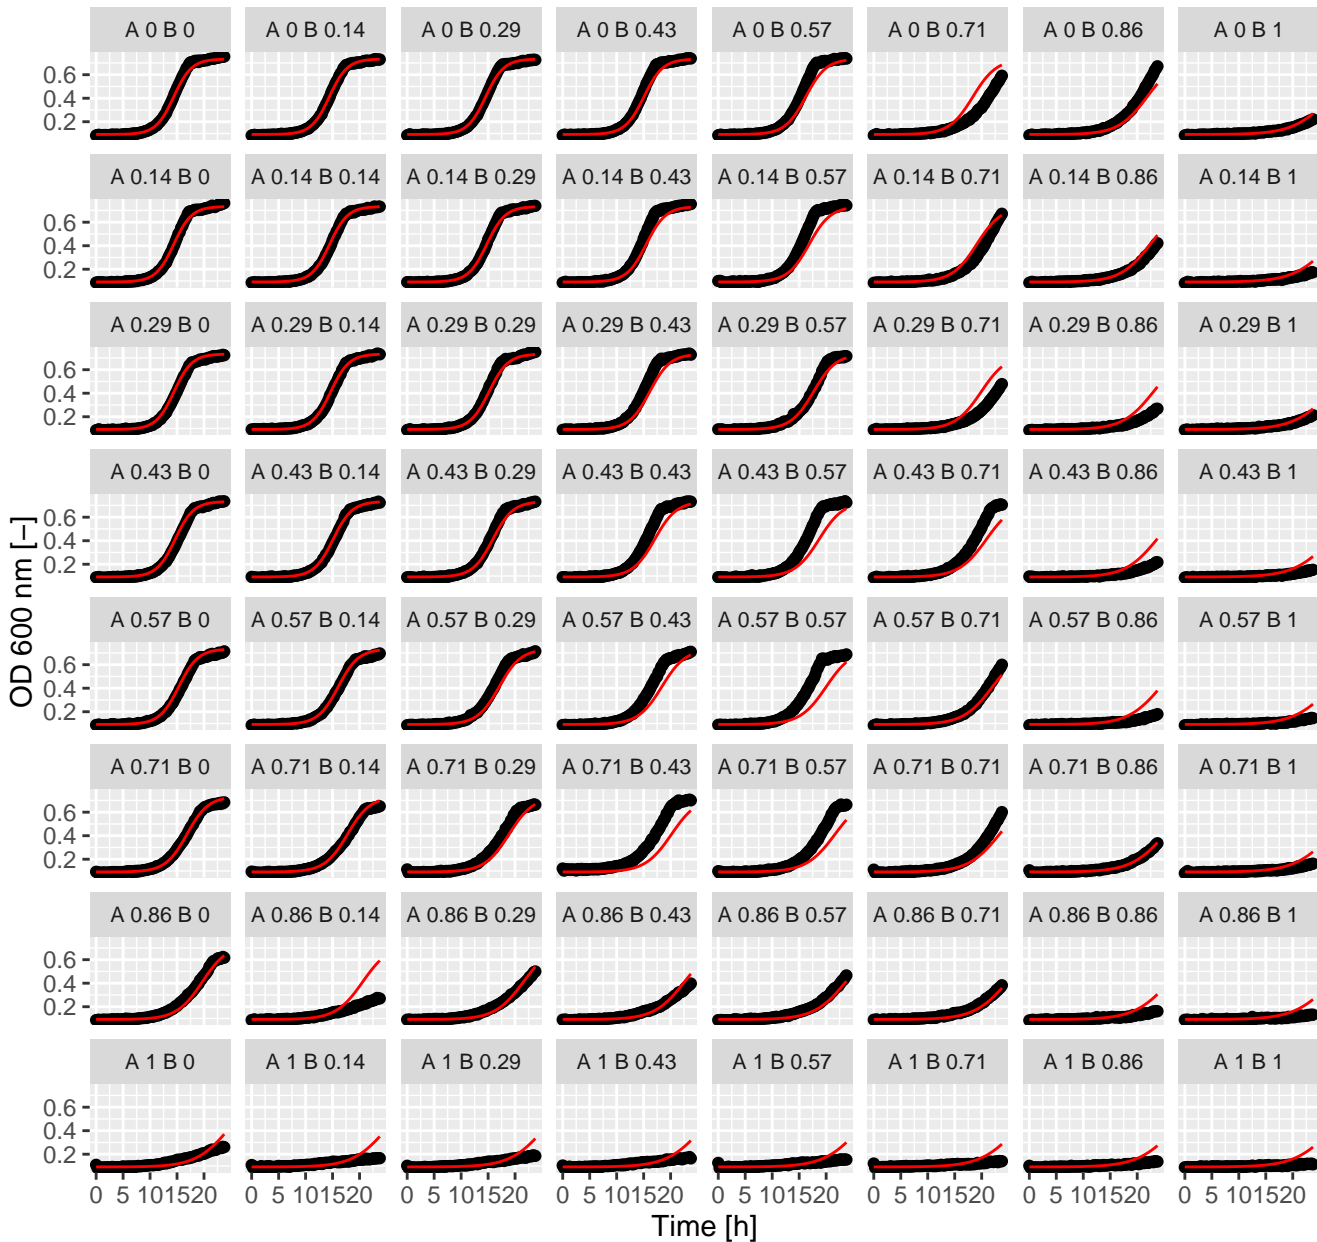

Cal.Pen (= Ax.Bx) Greco  
alpha = 2.42

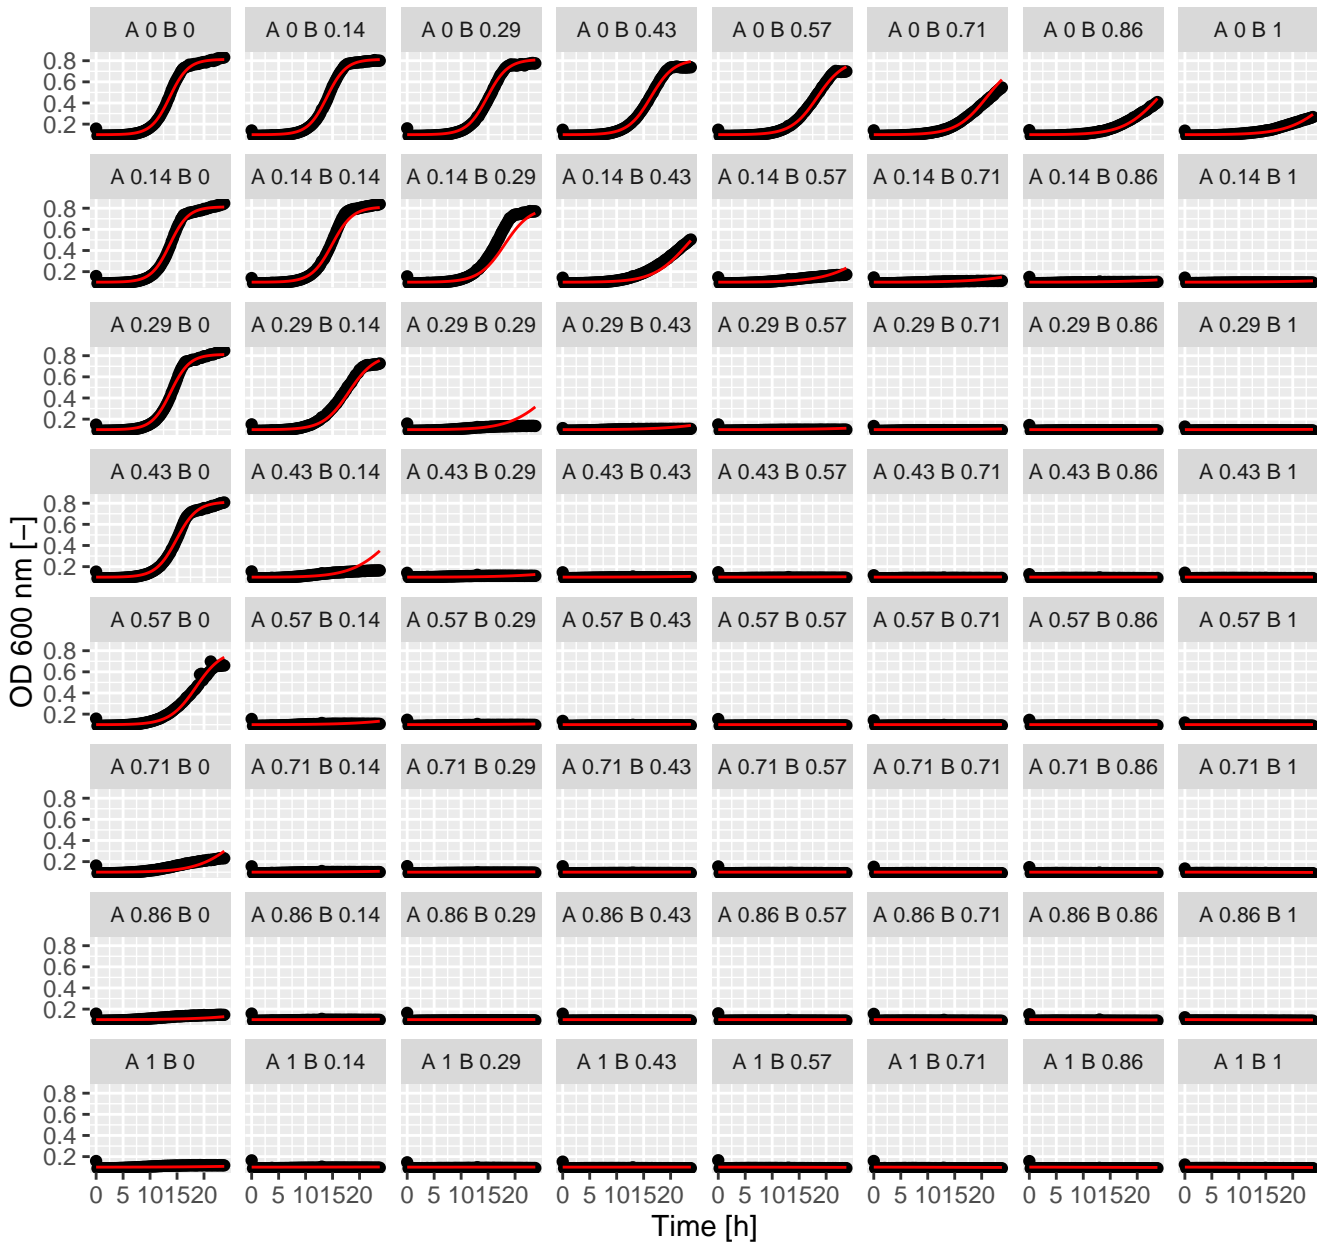

Cal.Lat (= Ax.Bx) Greco  
 $\alpha = -0.73$

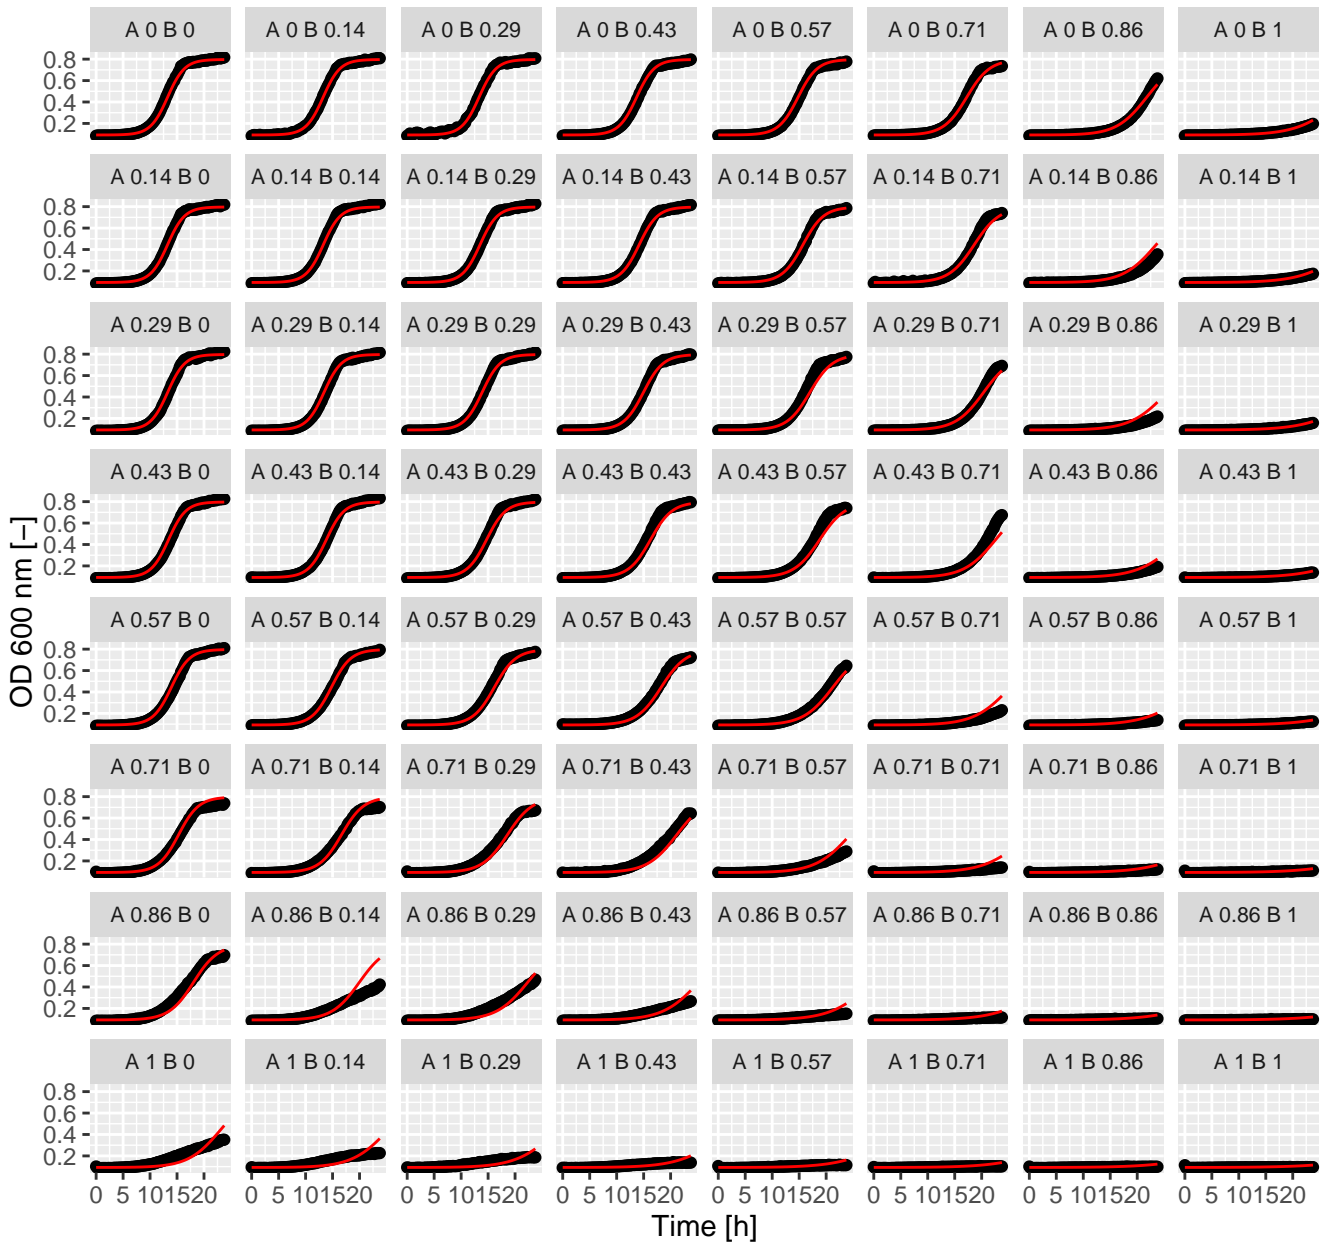

Cal.Hal (= Ax.Bx) Greco  
alpha = 25.73

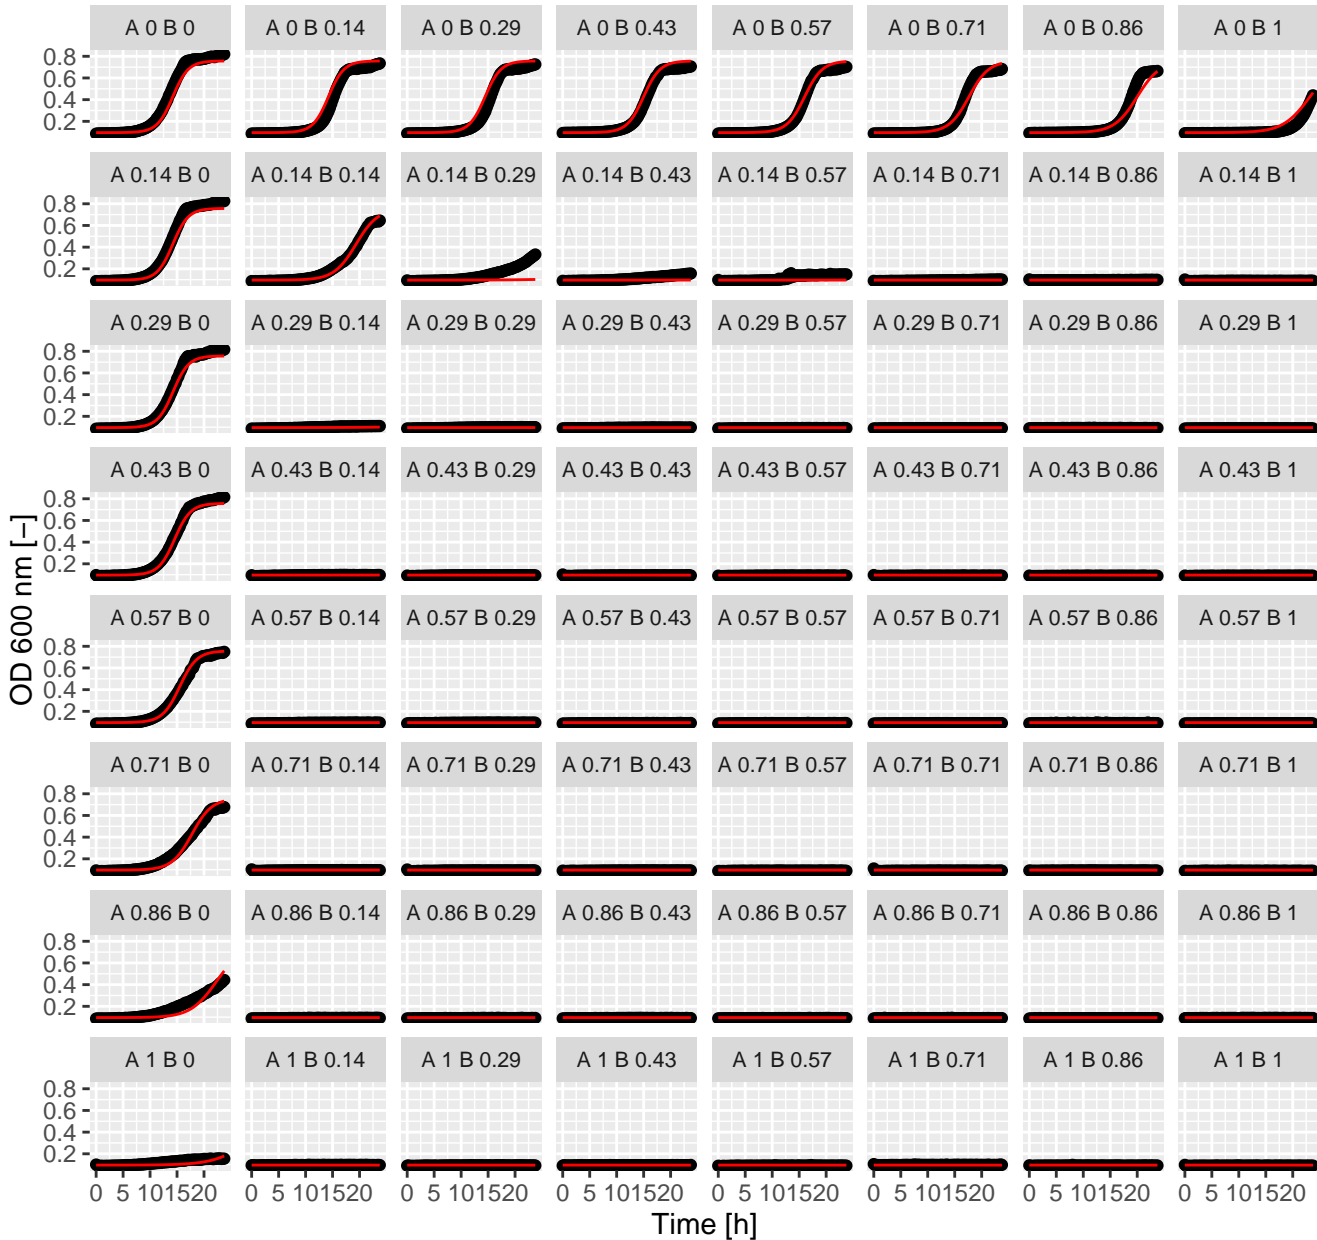



# Cal.Fen (= Ax.Bx) Greco

alpha = 17.16

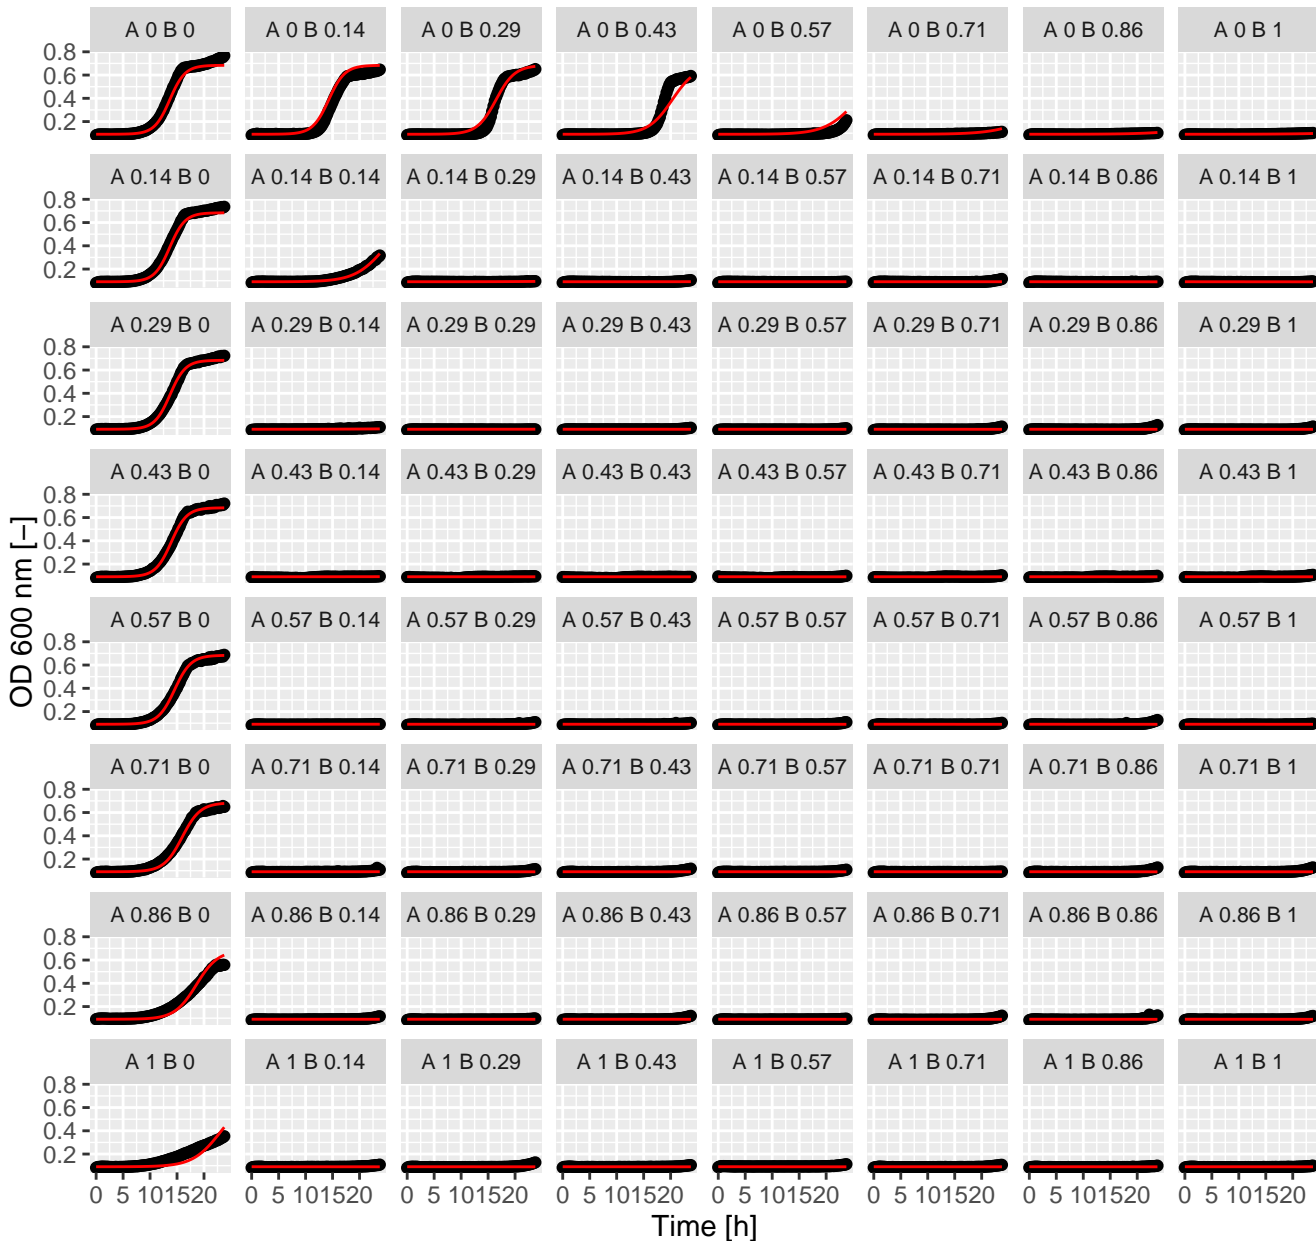

Cal.Dyc (= Ax.Bx) Greco  
alpha = 24.11

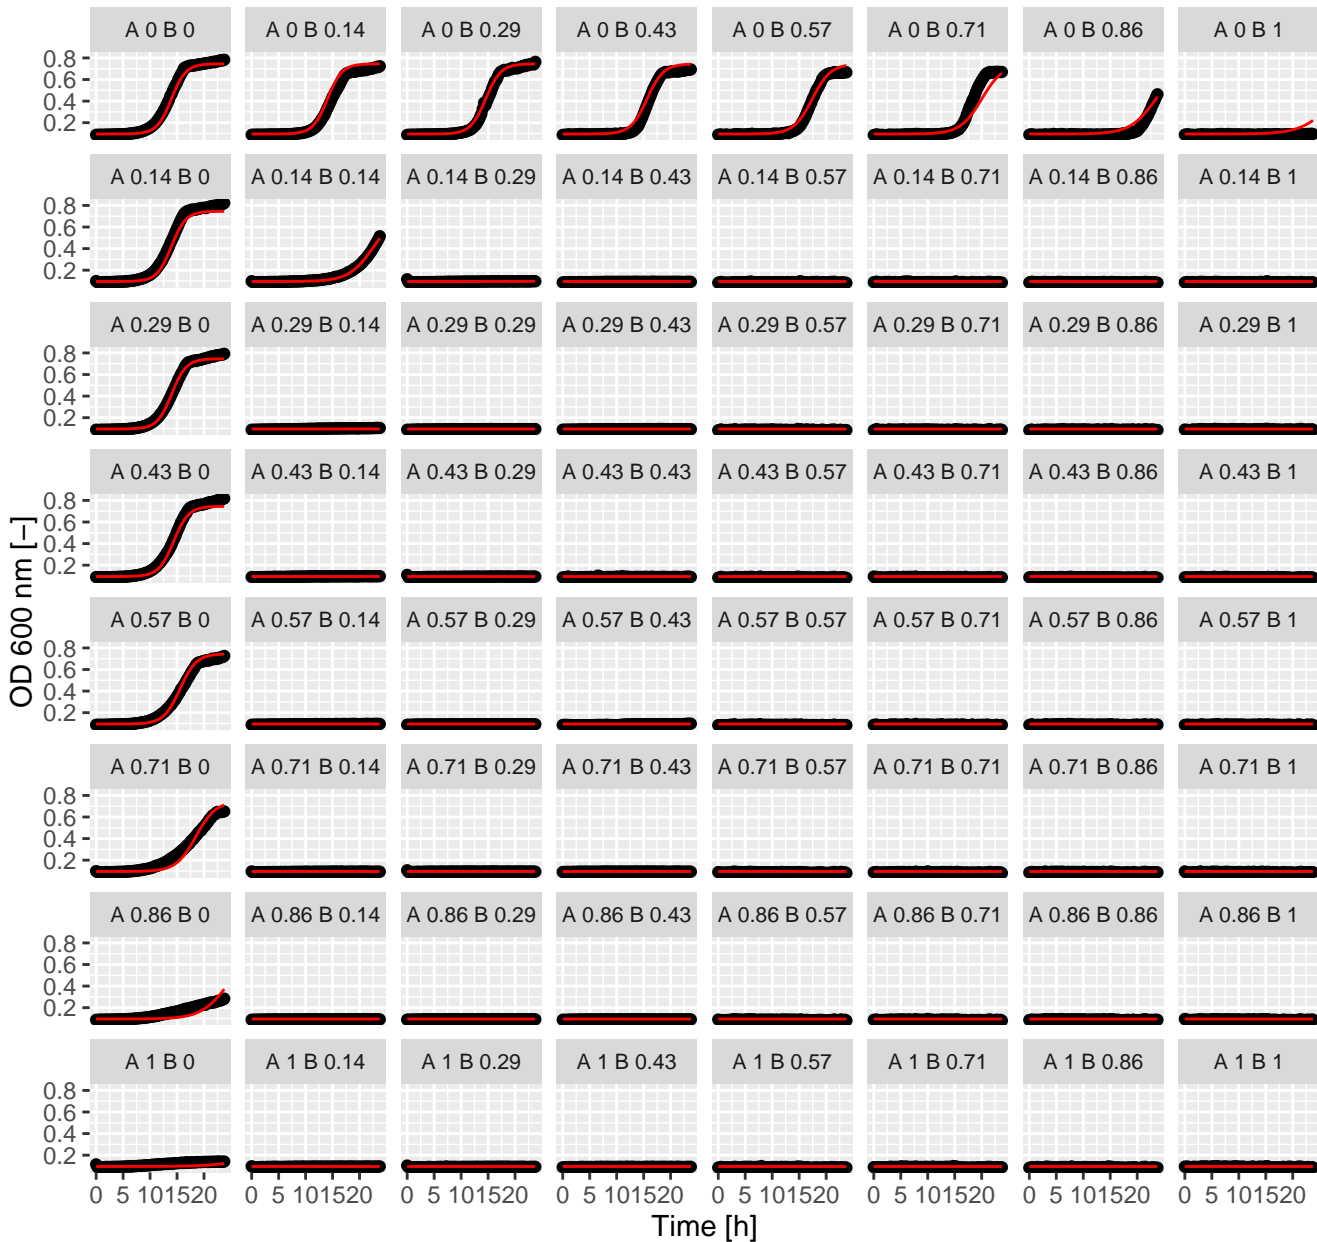

Cal.Cal (= Ax.Bx) Greco  
alpha = 0.55

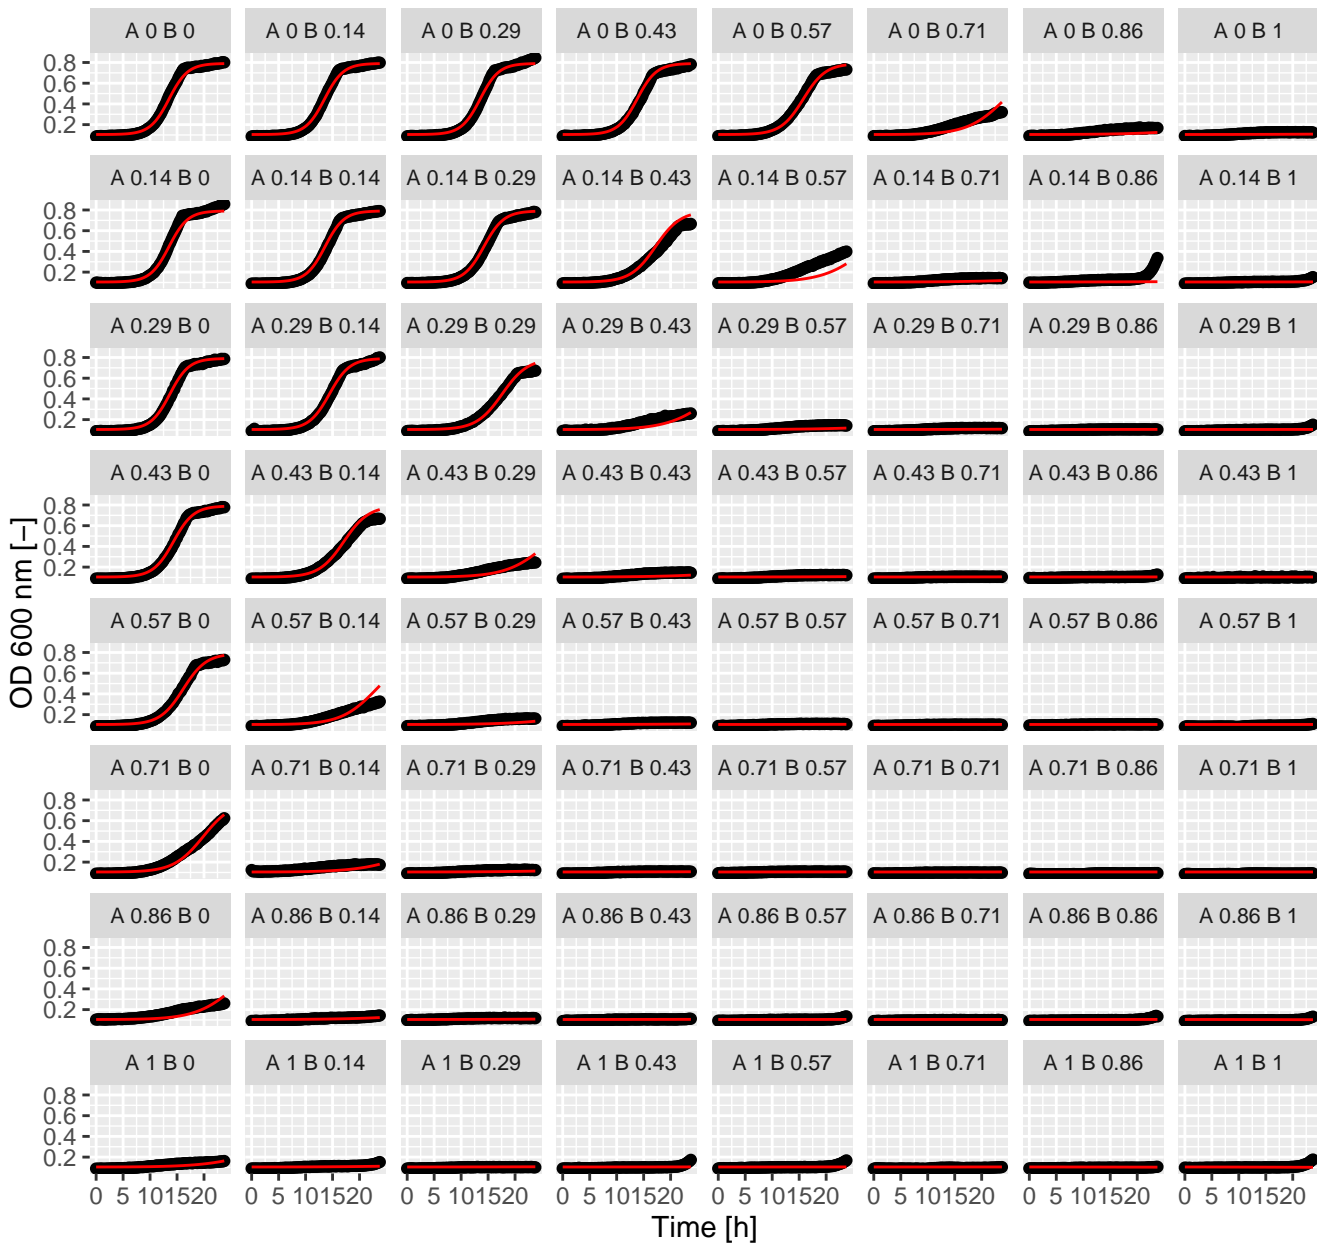

# C3P.Ter (= Ax.Bx) Greco alpha = 0.49

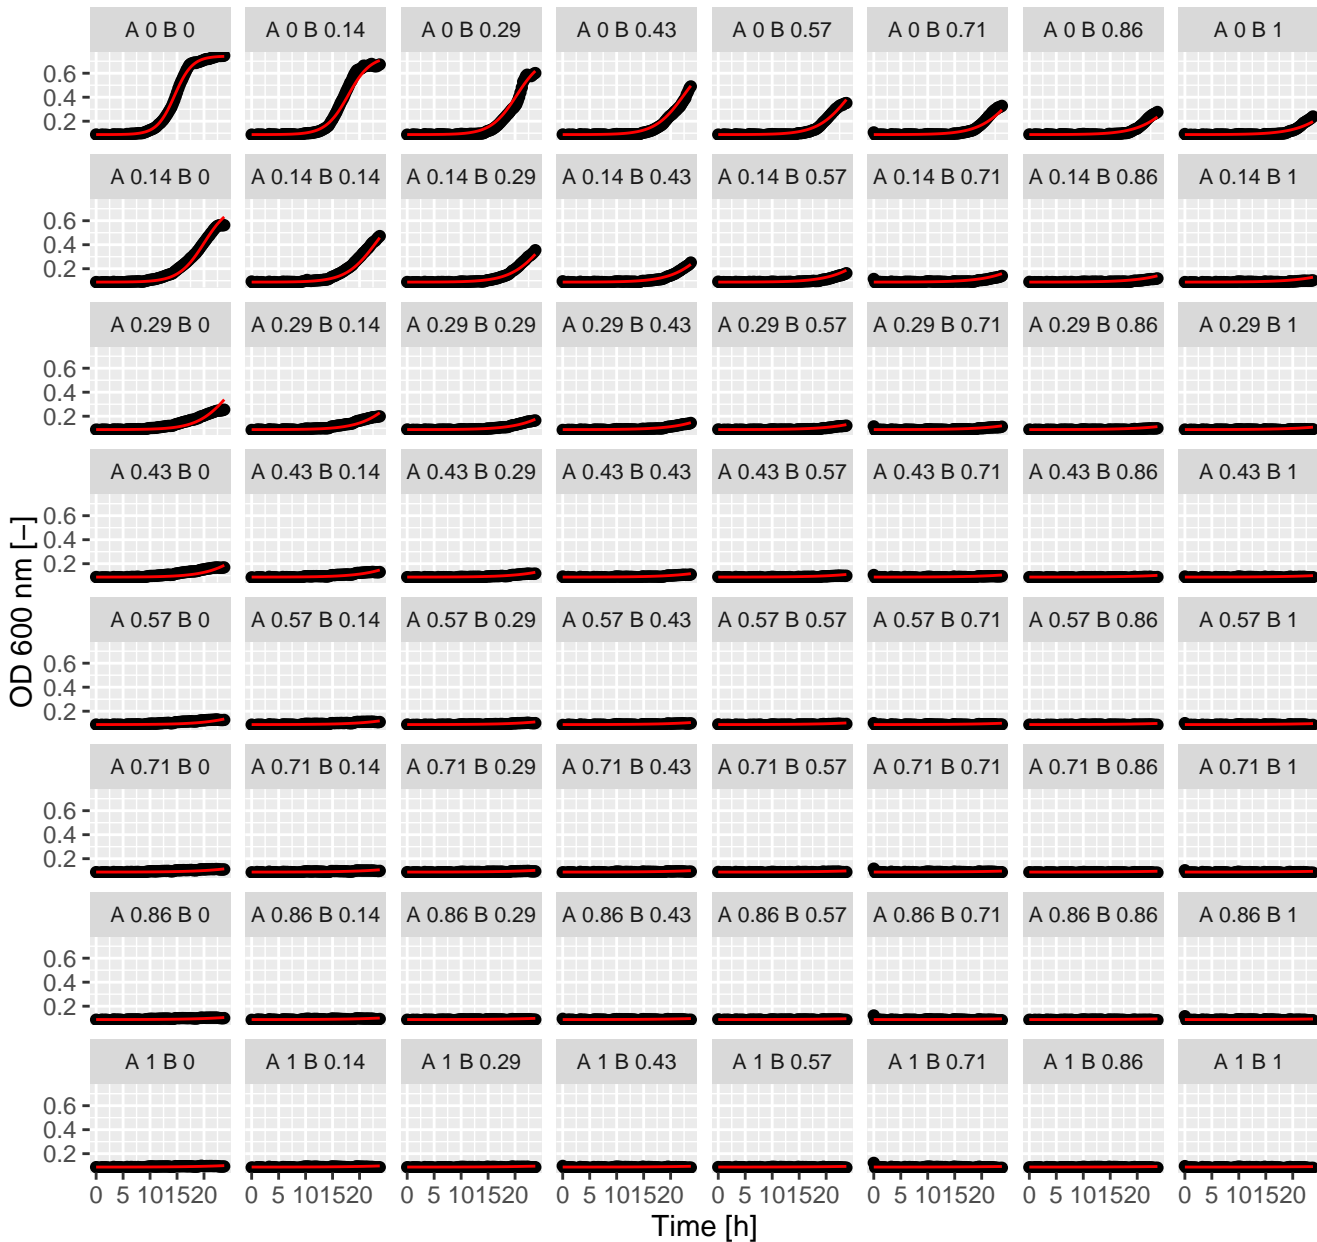

## C3P.Tac (= Ax.Bx) Greco

 $\alpha = -1.4$ 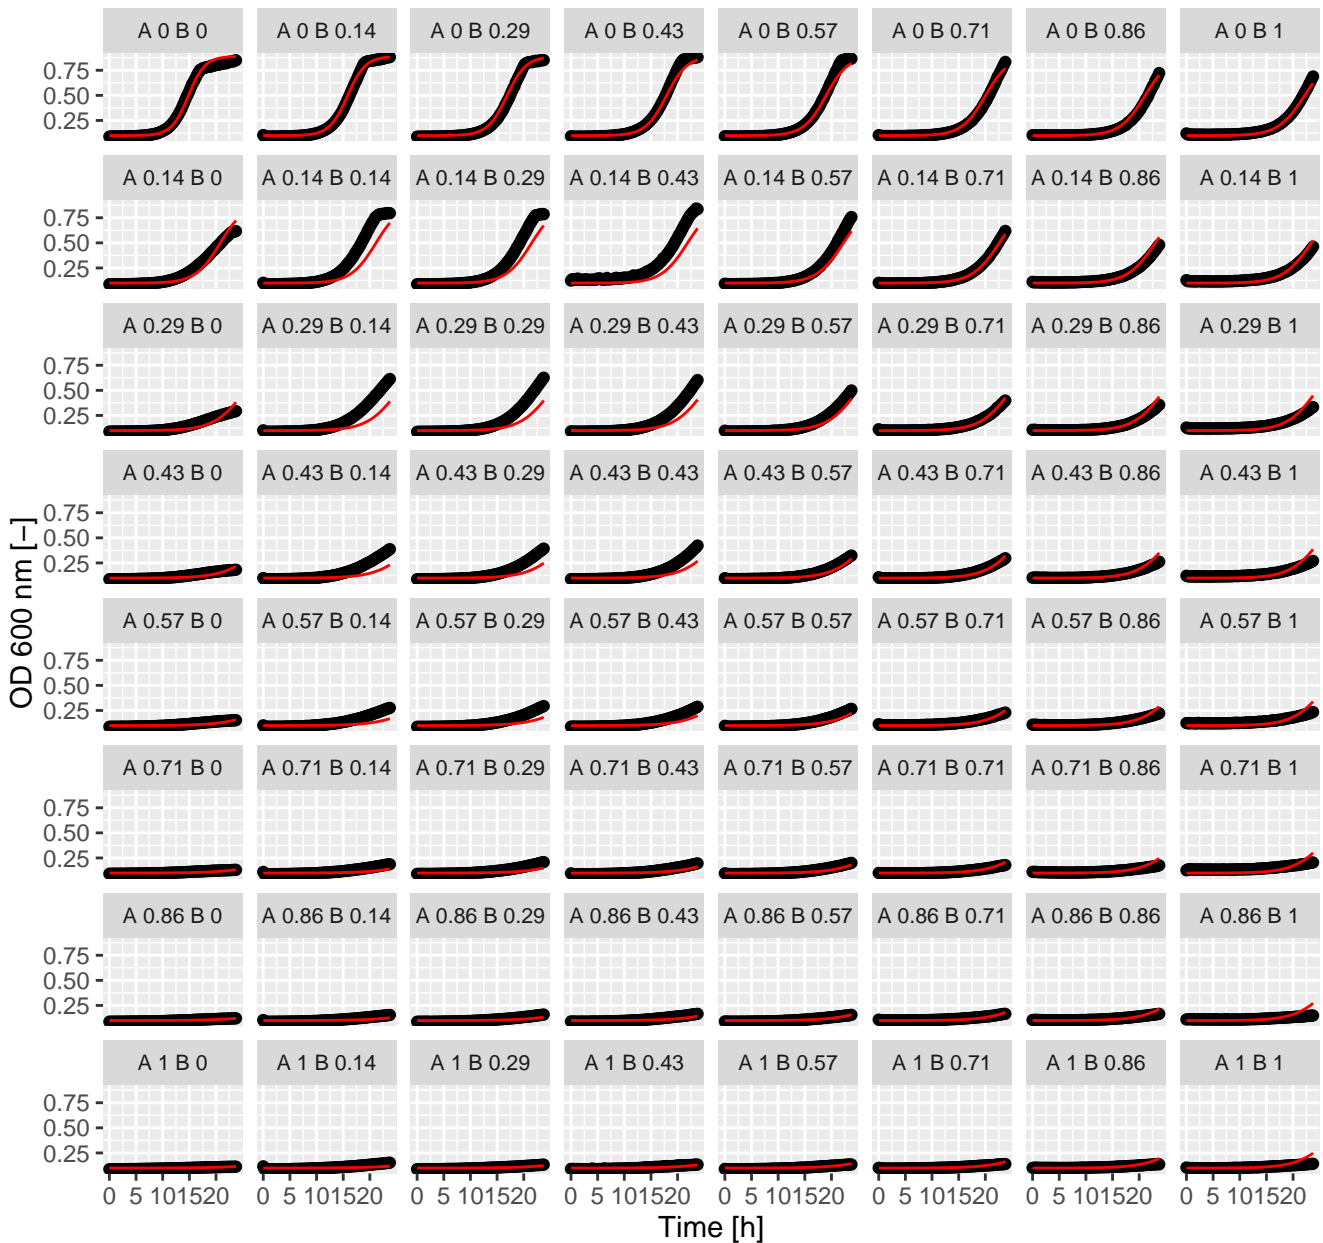

C3P.Sta (= Ax.Bx) Greco  
alpha = 0.1

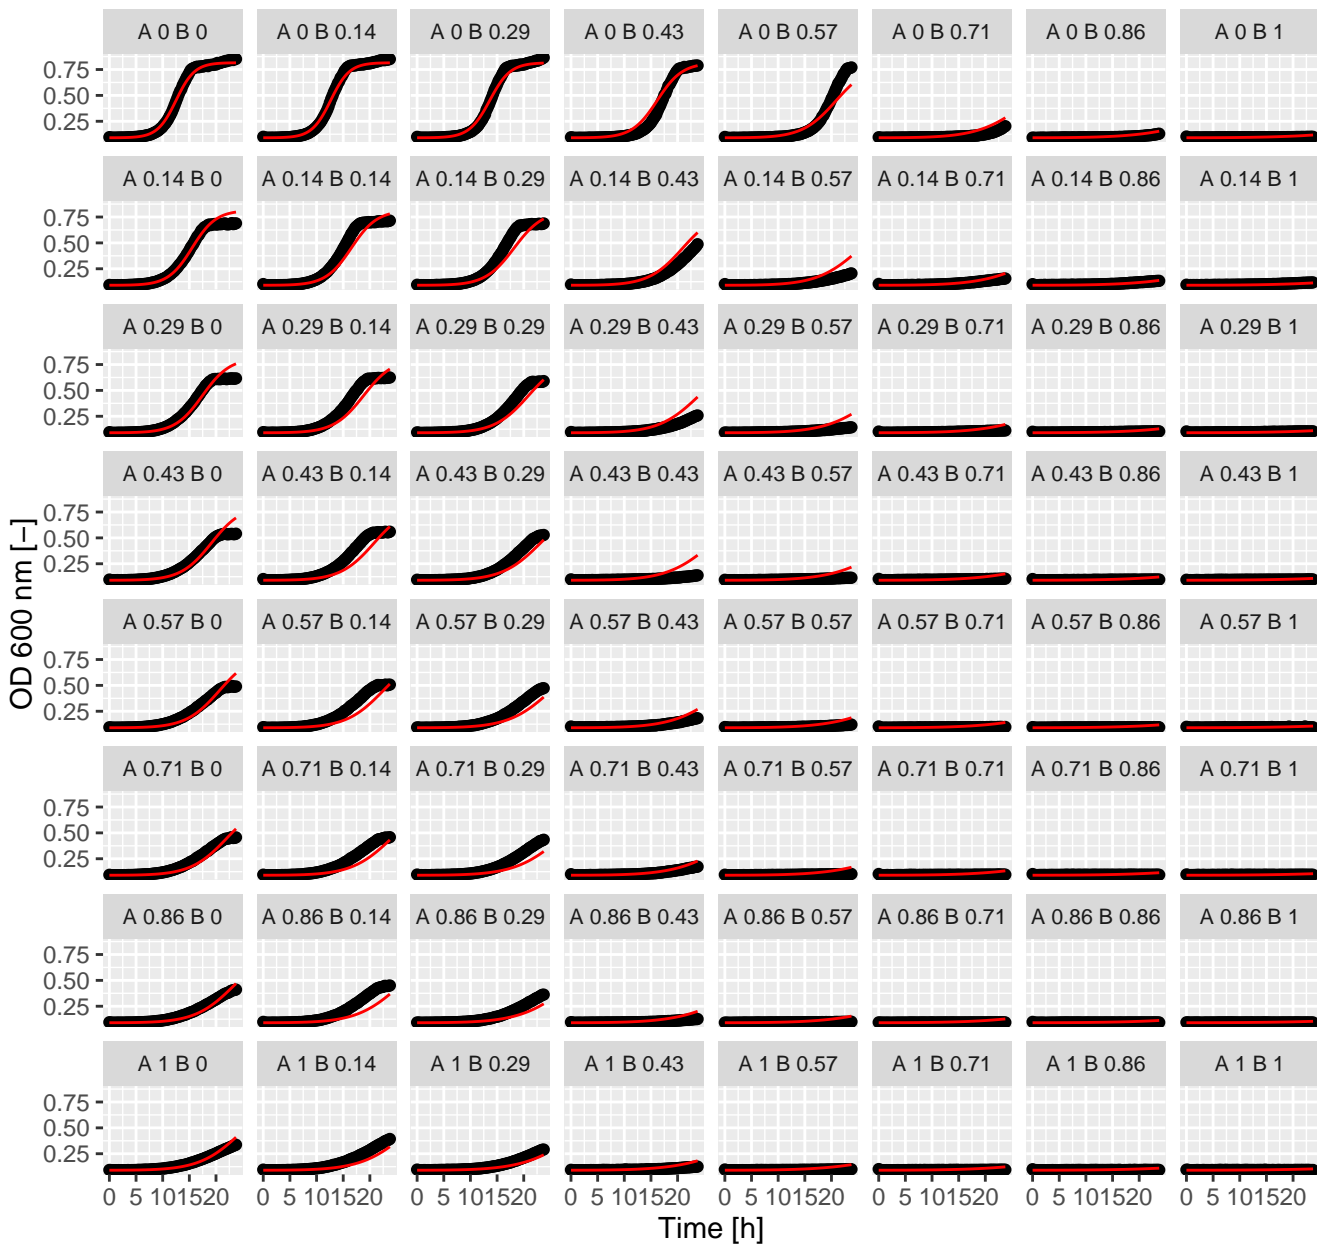

C3P.Pen (= Ax.Bx) Greco  
alpha = 15.45

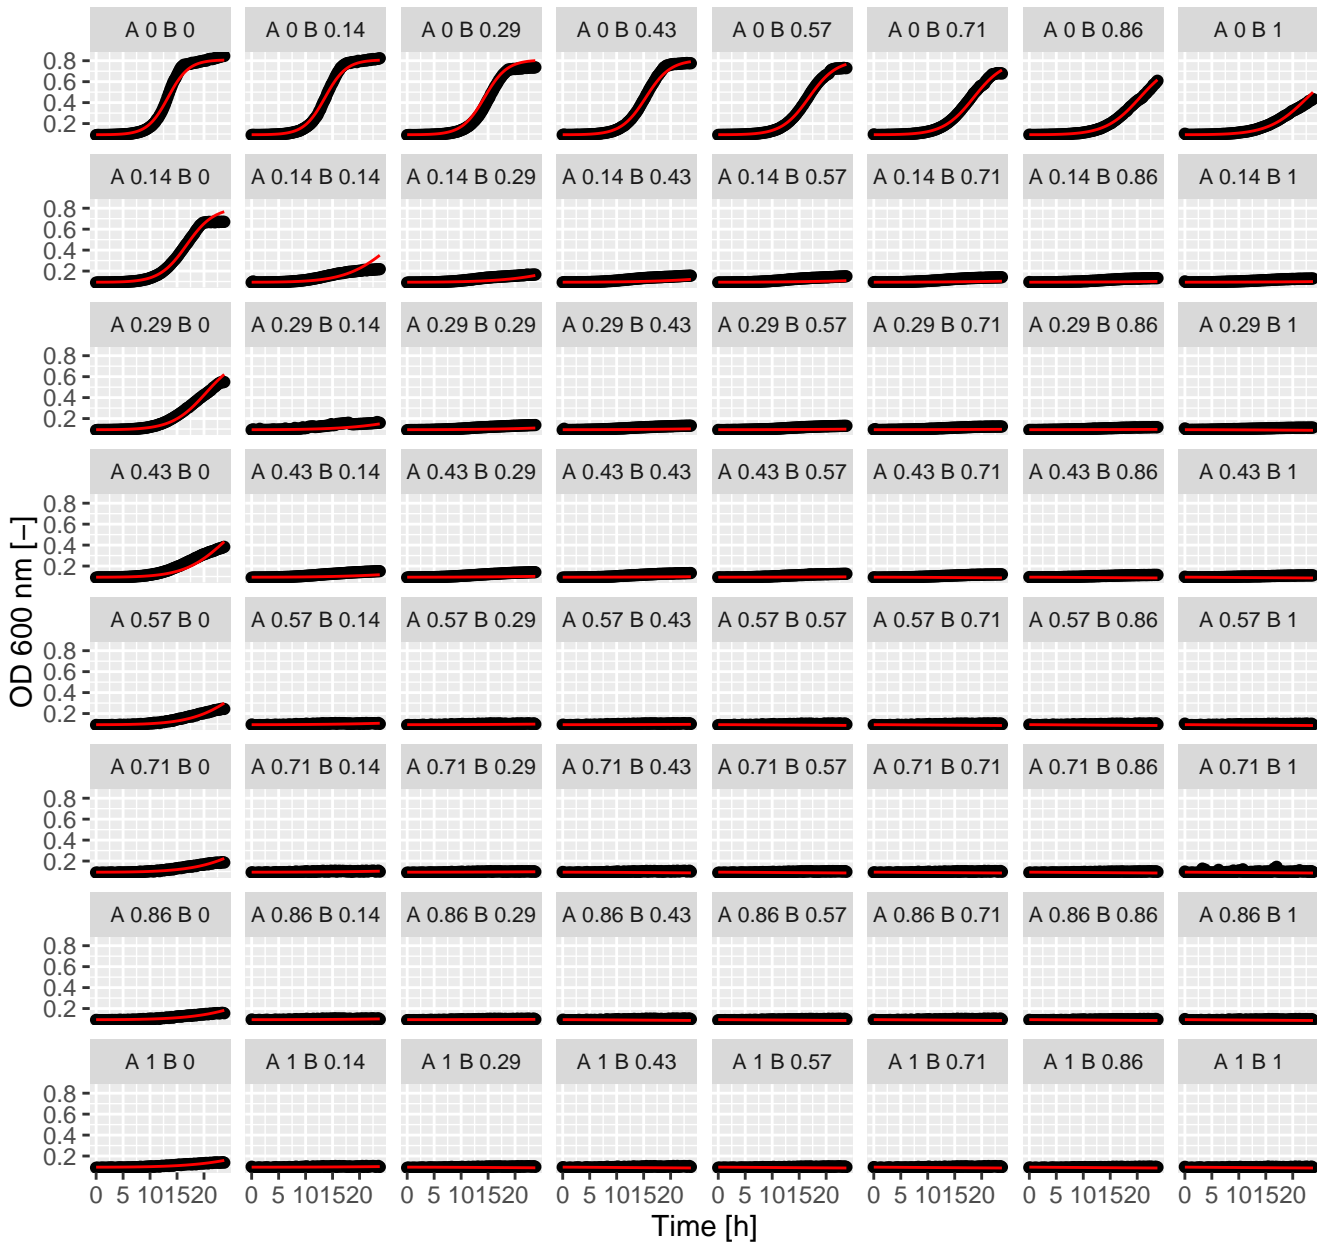

## C3P.Lat (= Ax.Bx) Greco

 $\alpha = -0.8$ 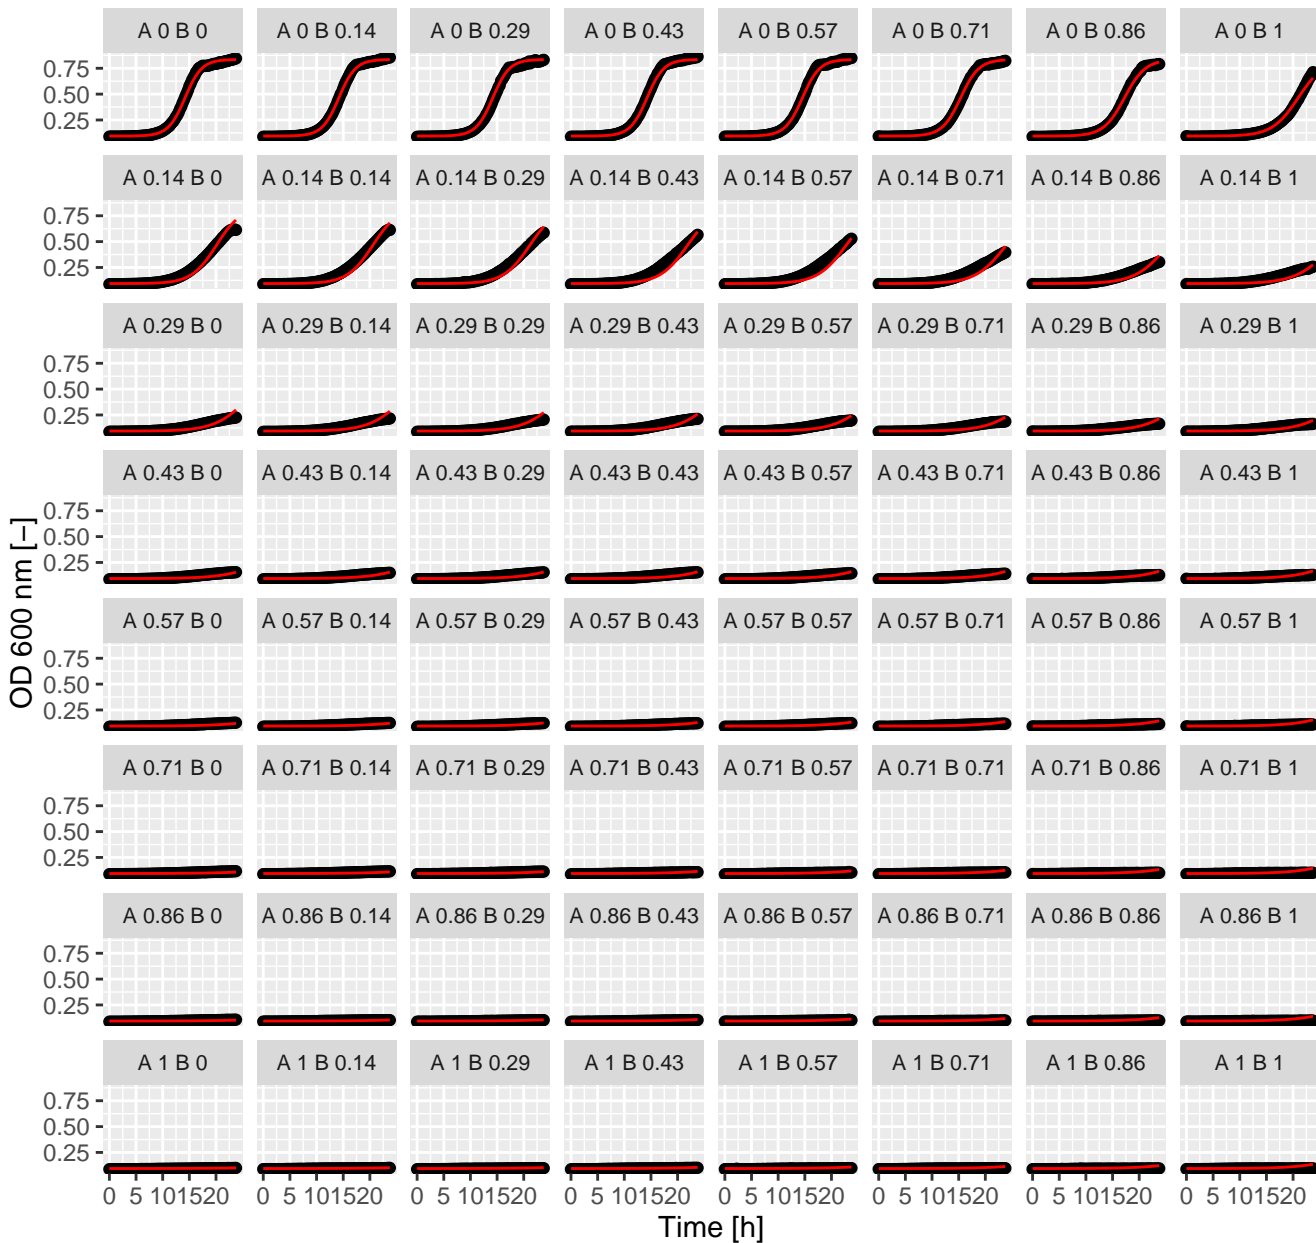



C3P.C3P (= Ax.Bx) Greco  
alpha = 0.23

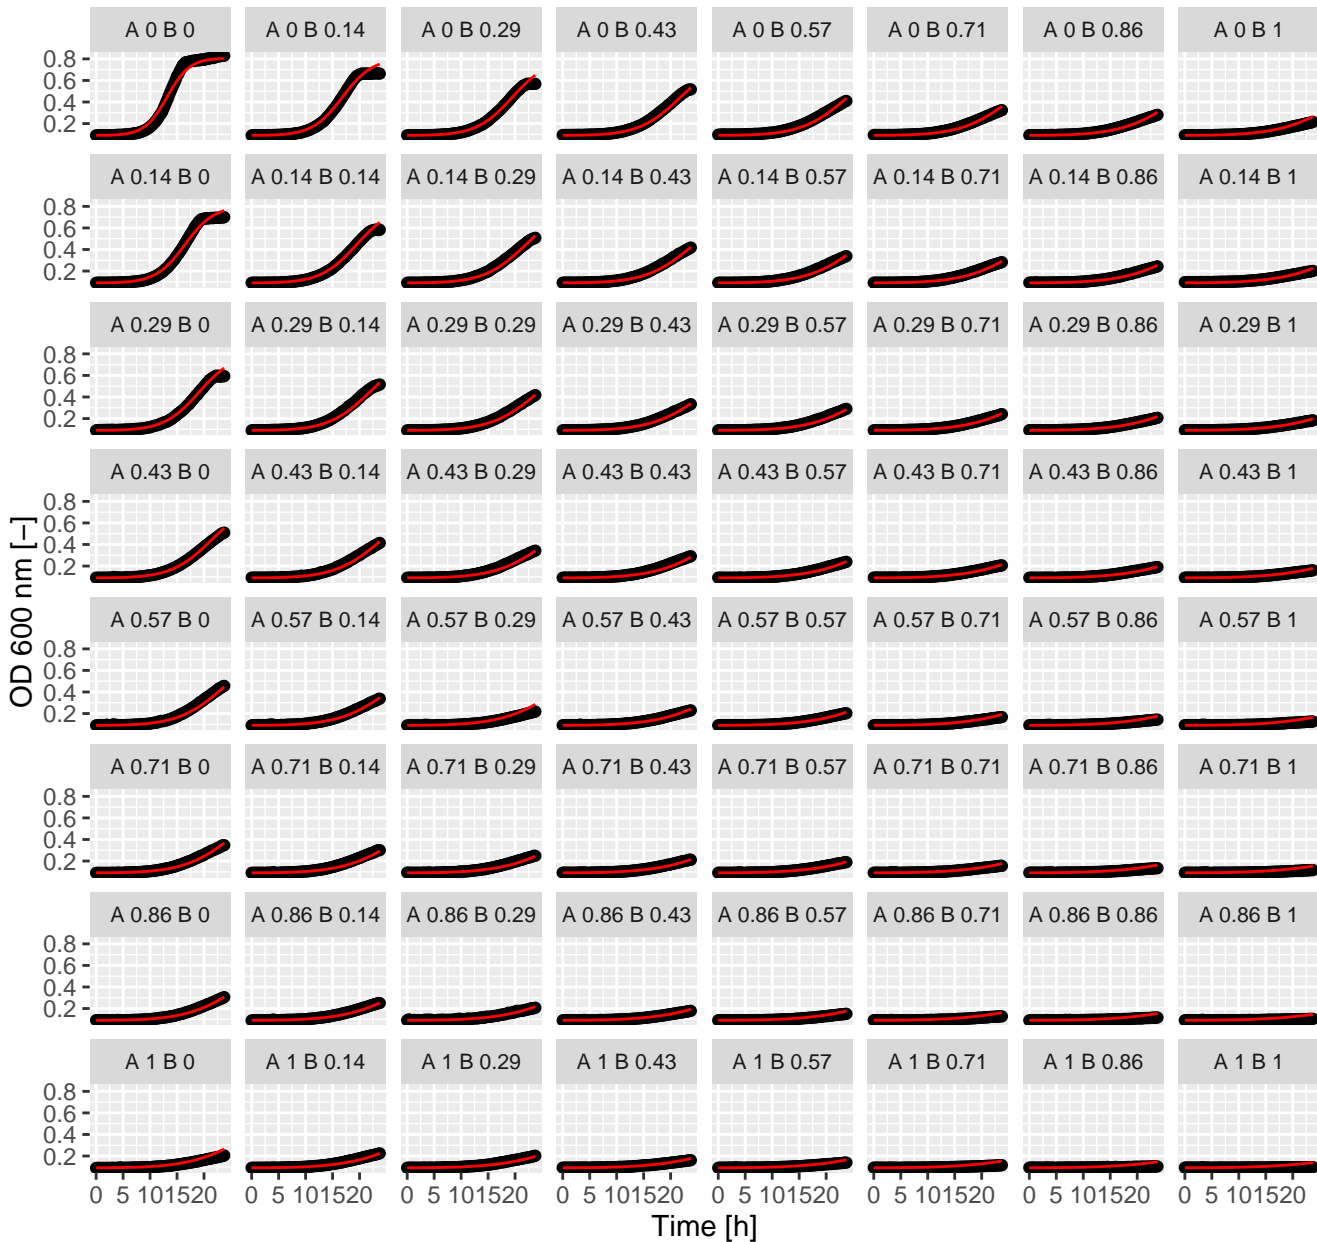

Bro.Tun (= Ax.Bx) Greco  
 $\alpha = -0.61$

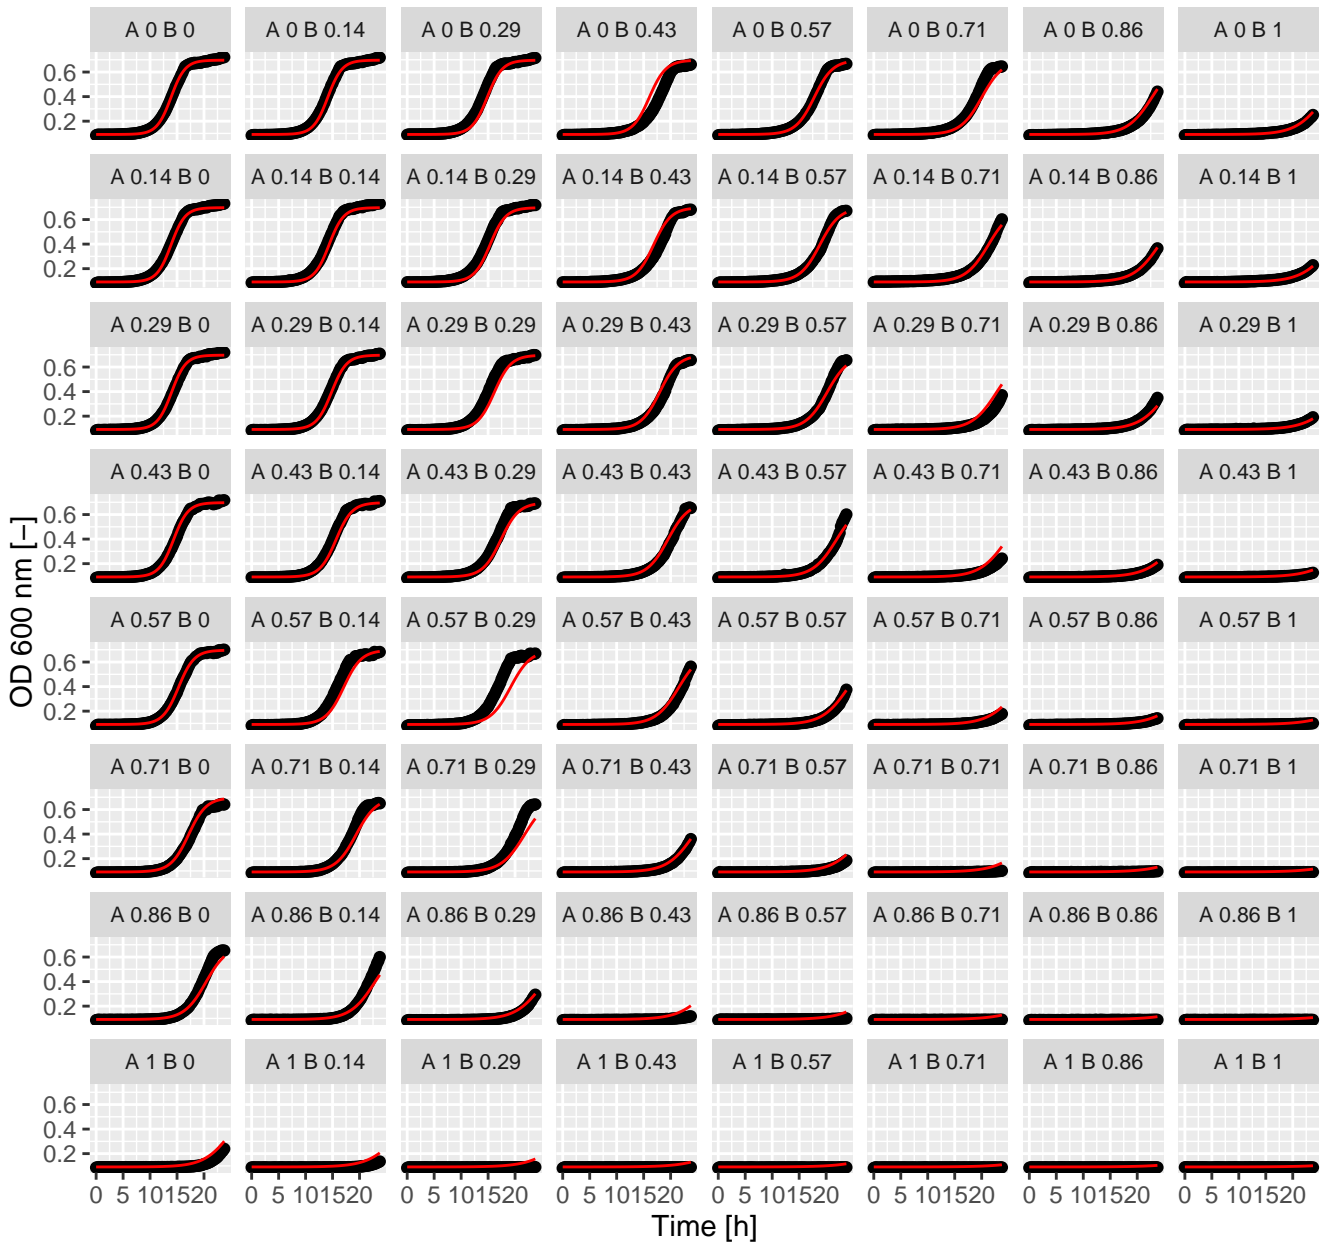

Bro.Ter (= Ax.Bx) Greco  
 $\alpha = -0.58$

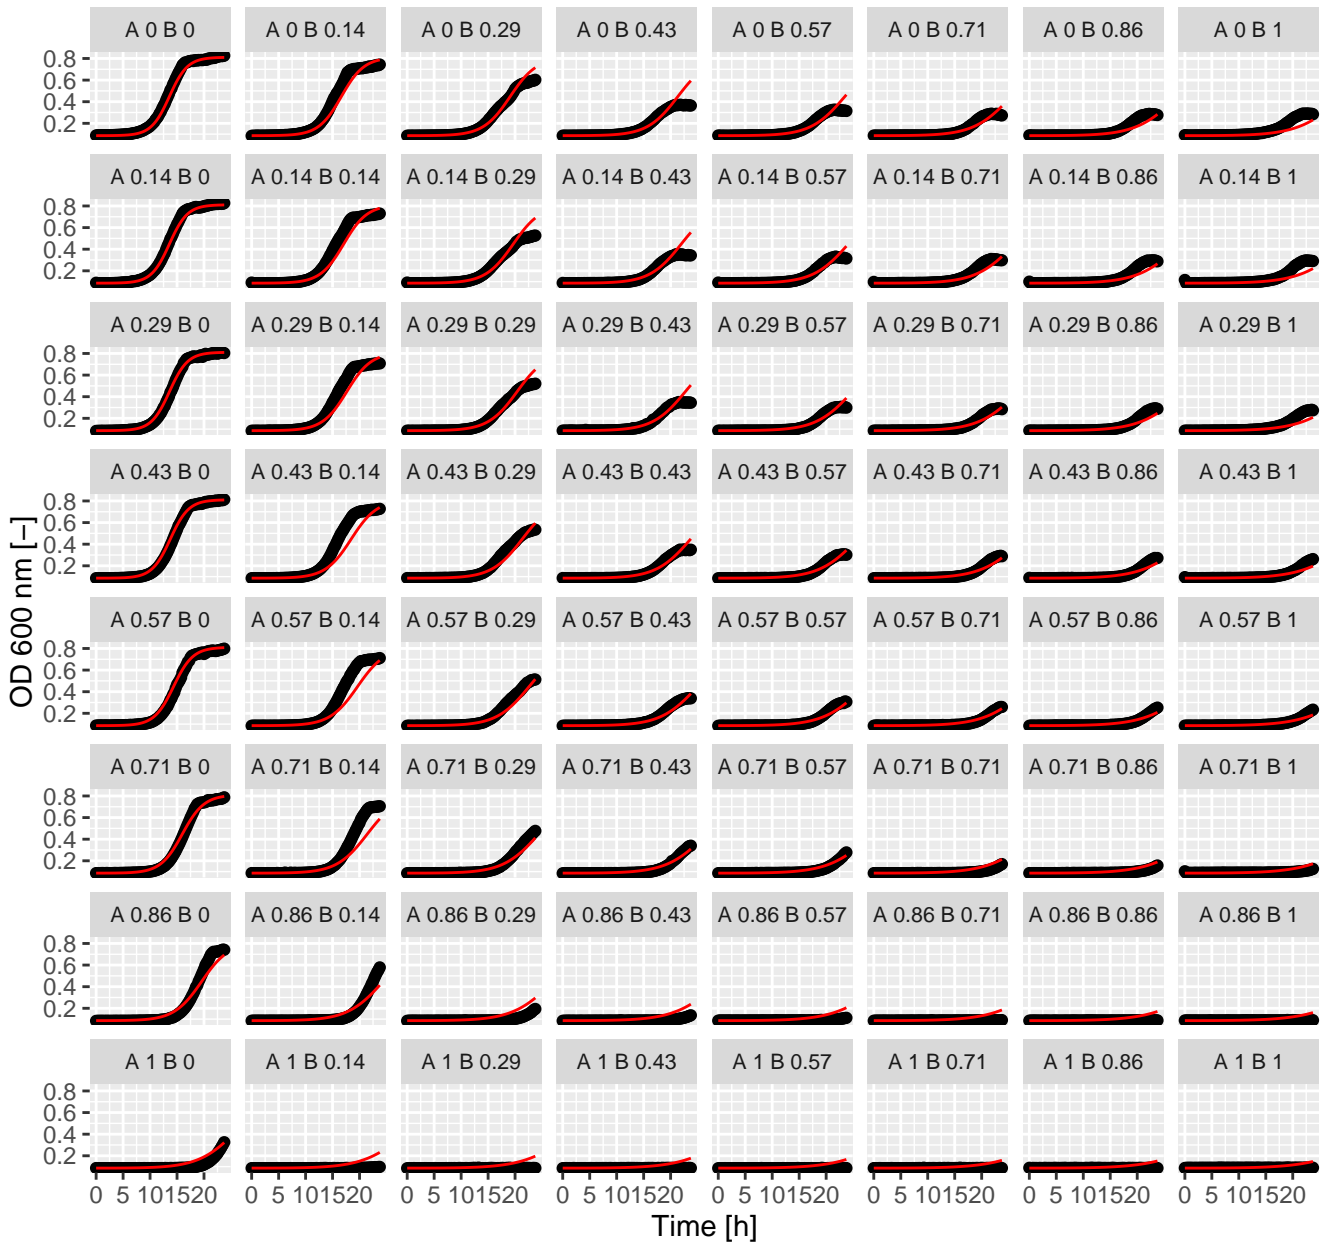

Bro.Tac (= Ax.Bx) Greco  
 $\alpha = -1.03$

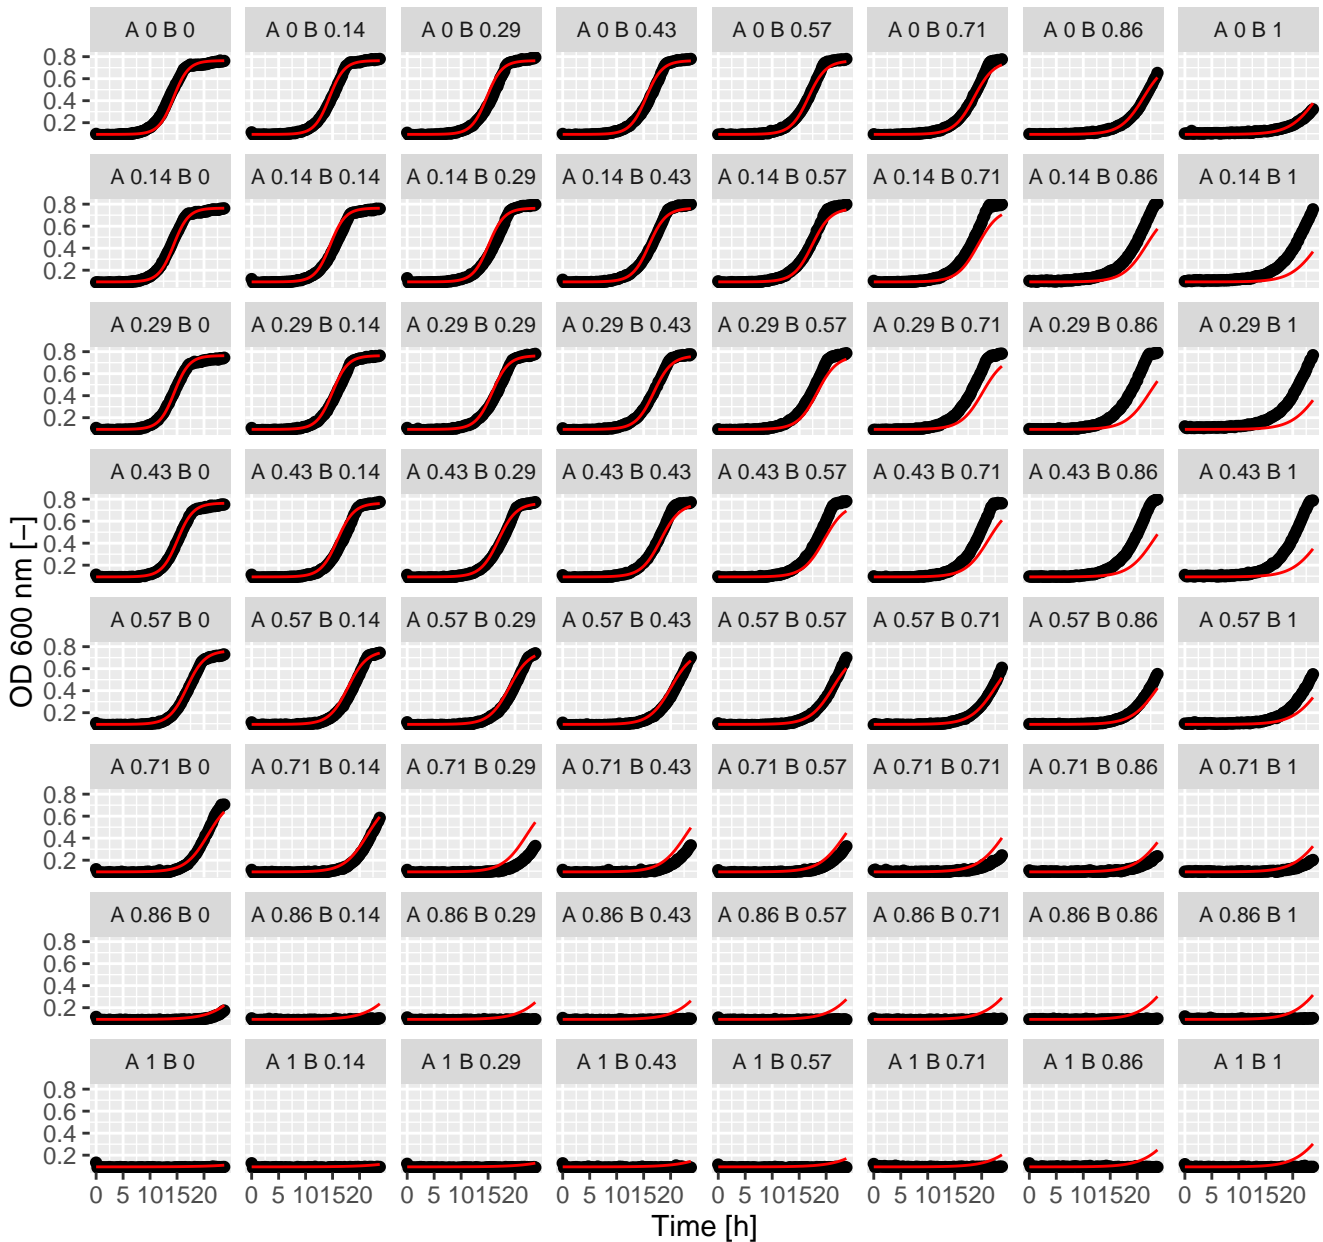

Bro.Sta (= Ax.Bx) Greco  
 $\alpha = -1.16$

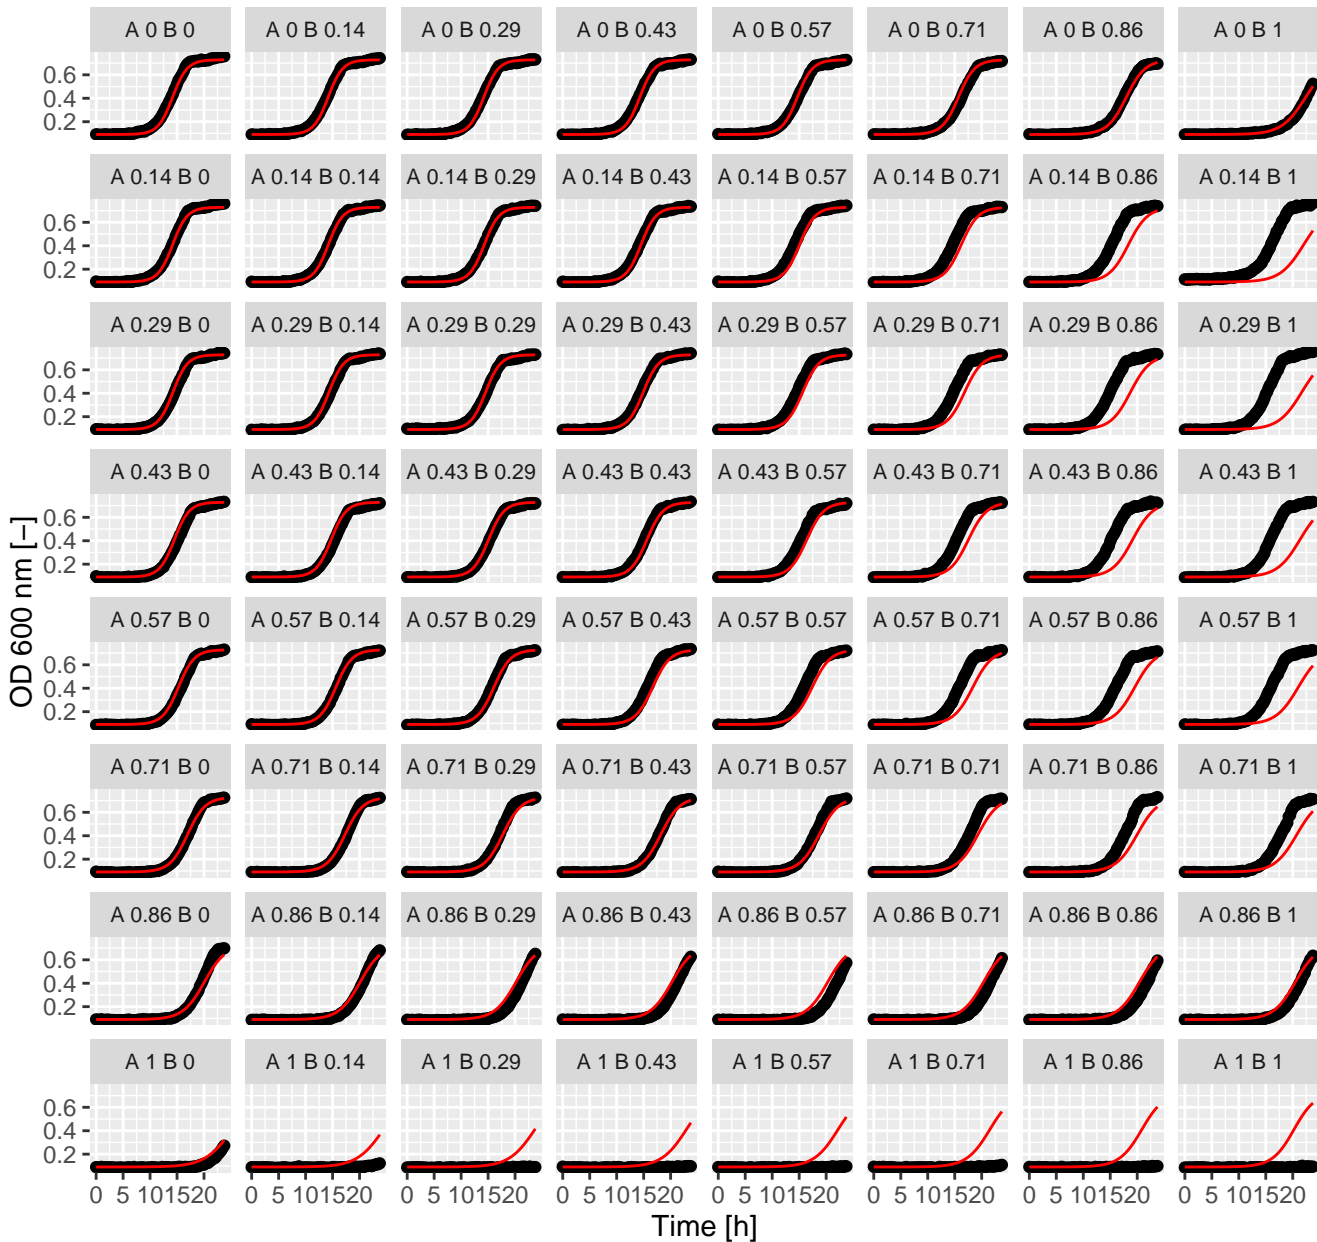

Bro.Rap (= Ax.Bx) Greco  
 $\alpha = -1.02$

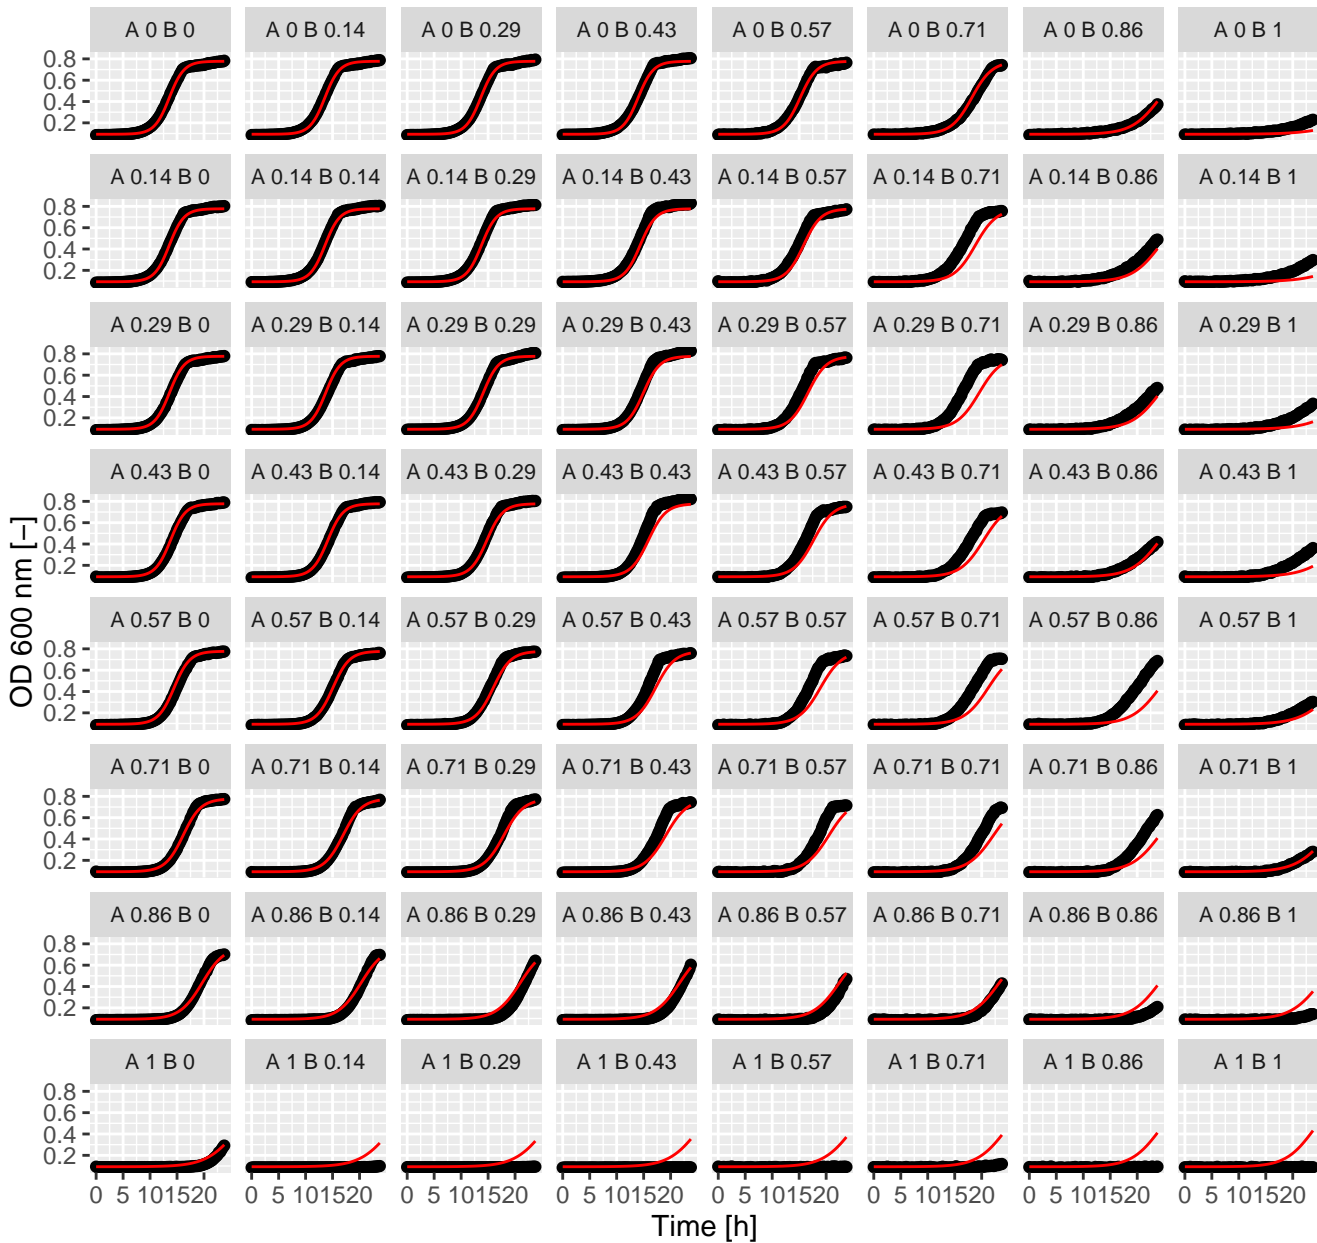

Bro.Pen (= Ax.Bx) Greco  
 $\alpha = -0.81$

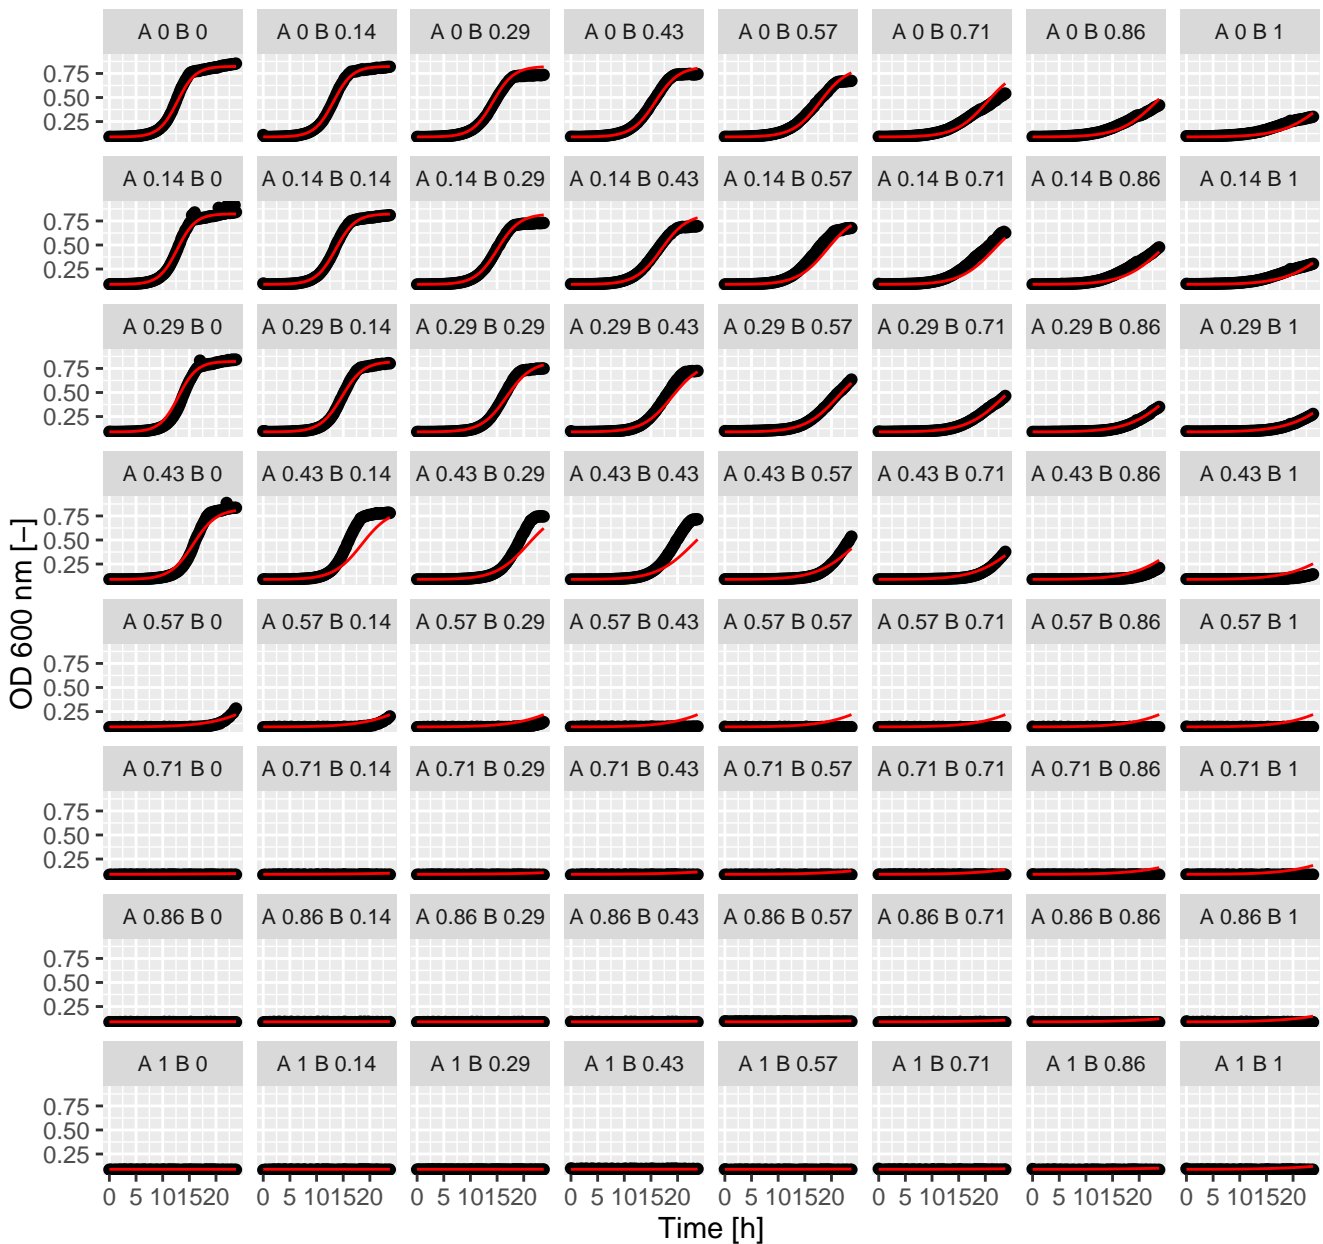

Bro.Lat (= Ax.Bx) Greco  
 $\alpha = -0.91$

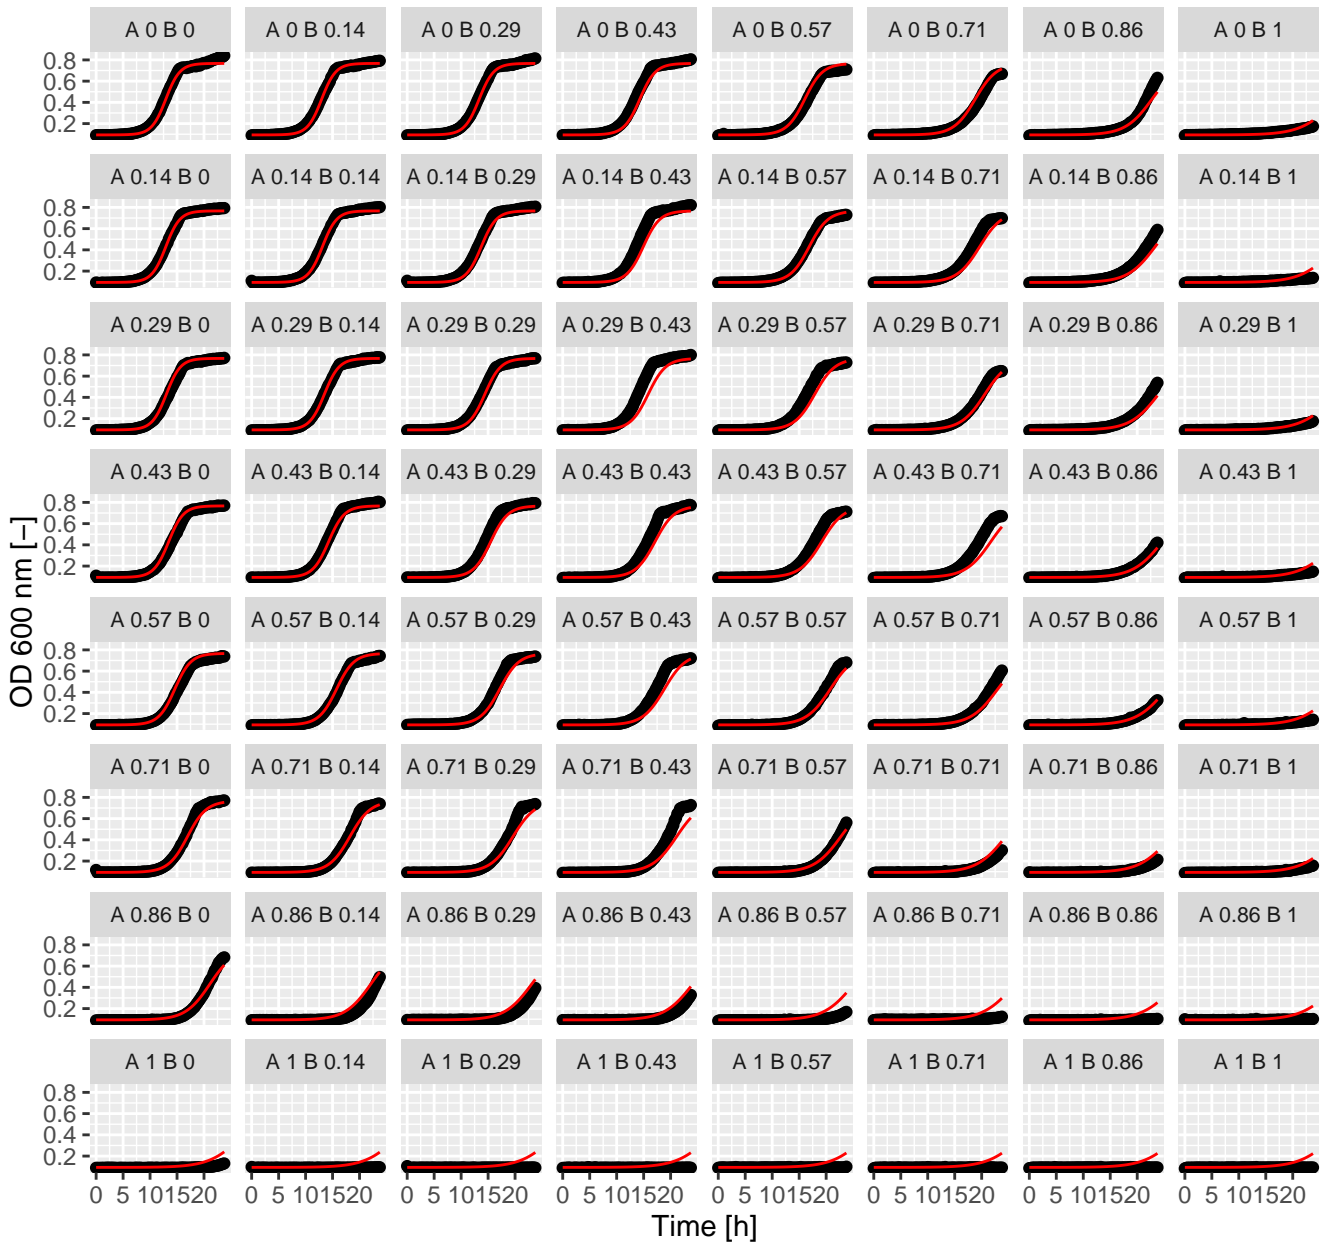



Bro.Hal (= Ax.Bx) Greco  
 $\alpha = -0.99$

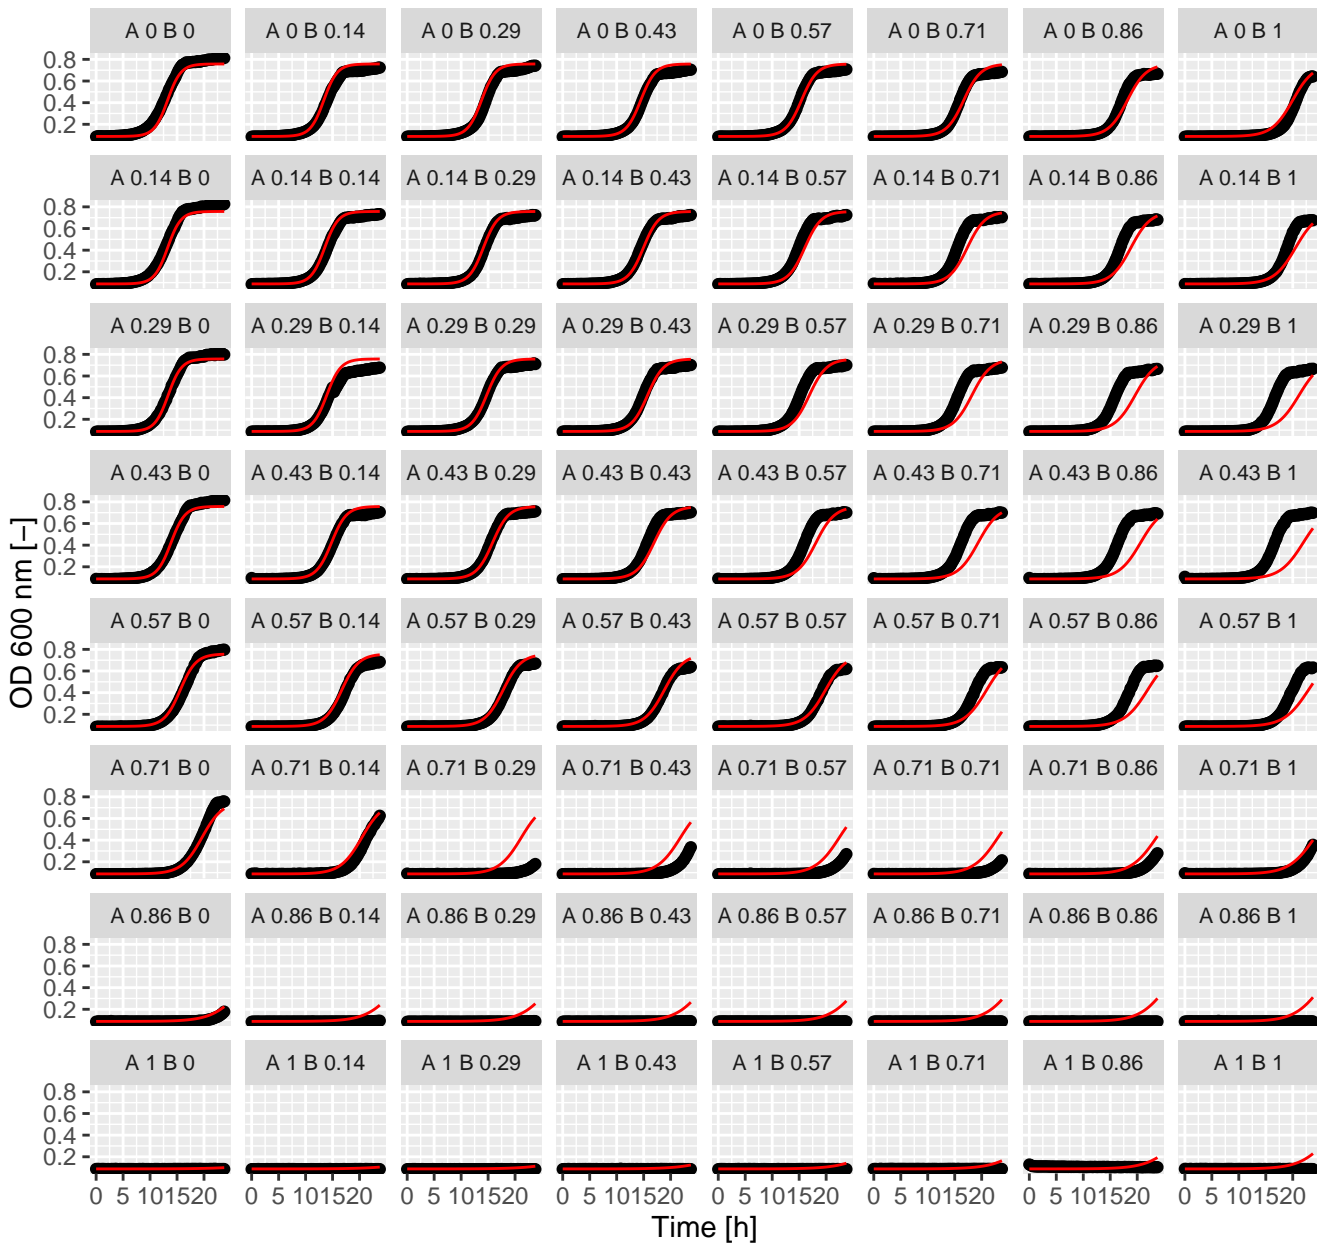

Bro.Fen (= Ax.Bx) Greco  
 $\alpha = -0.82$

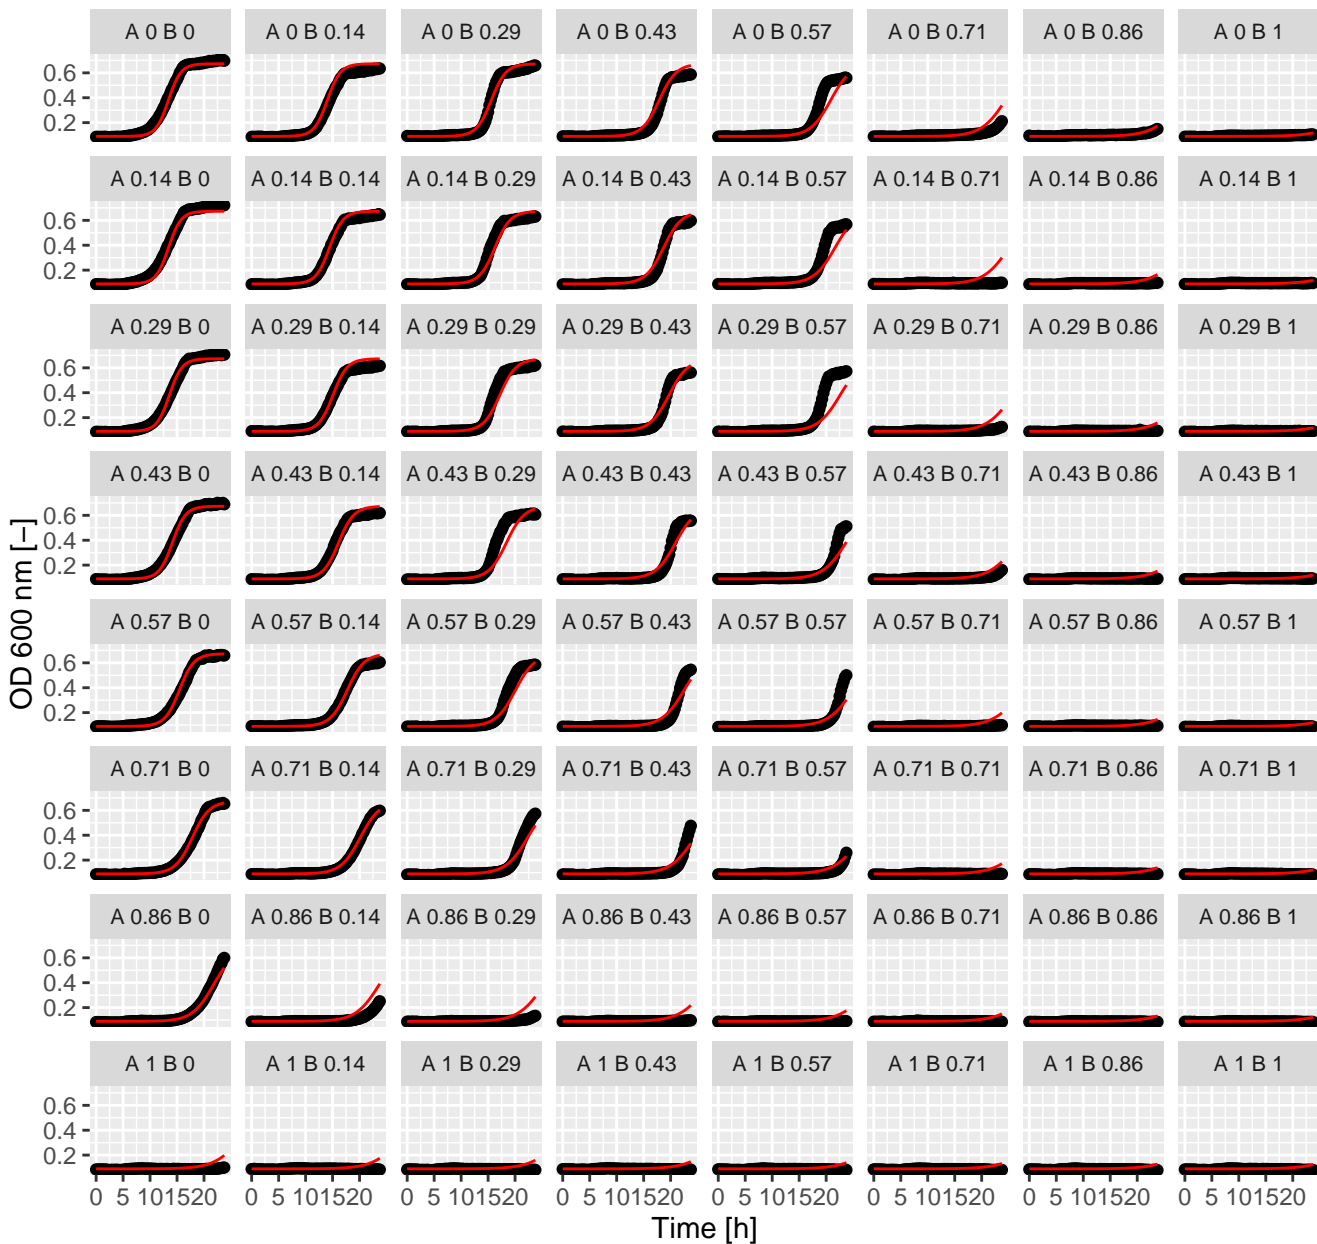

Bro.Dyc (= Ax.Bx) Greco  
 $\alpha = -0.85$

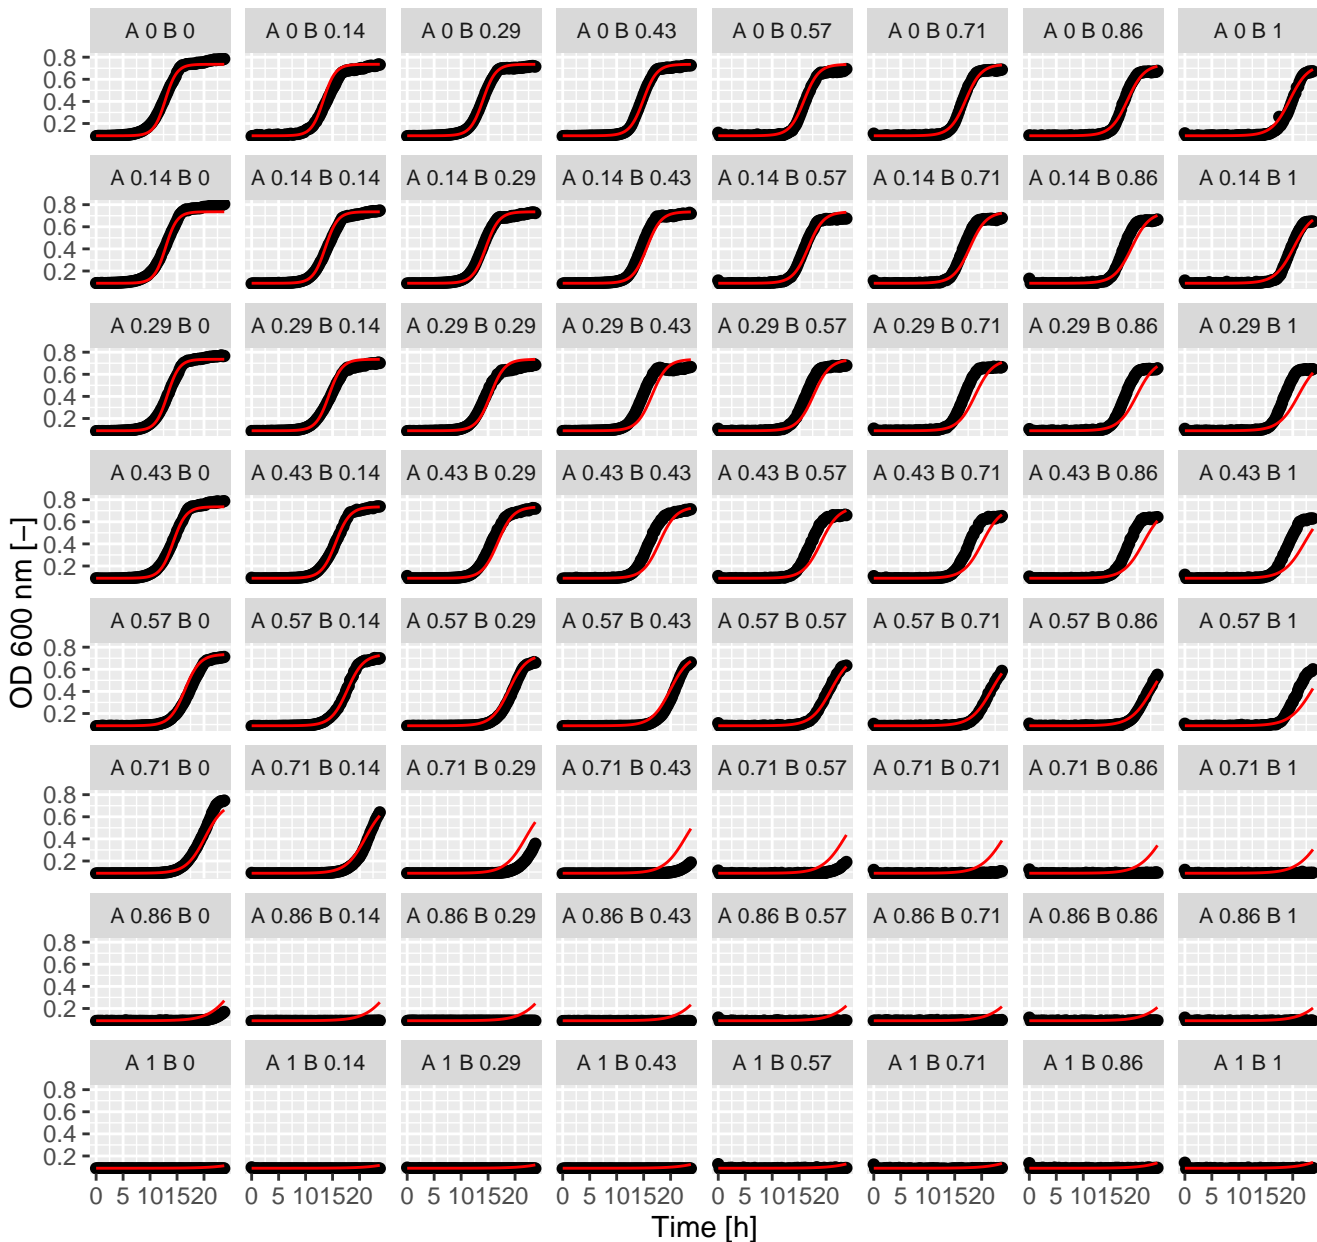

Bro.Cal (= Ax.Bx) Greco  
 $\alpha = -0.94$

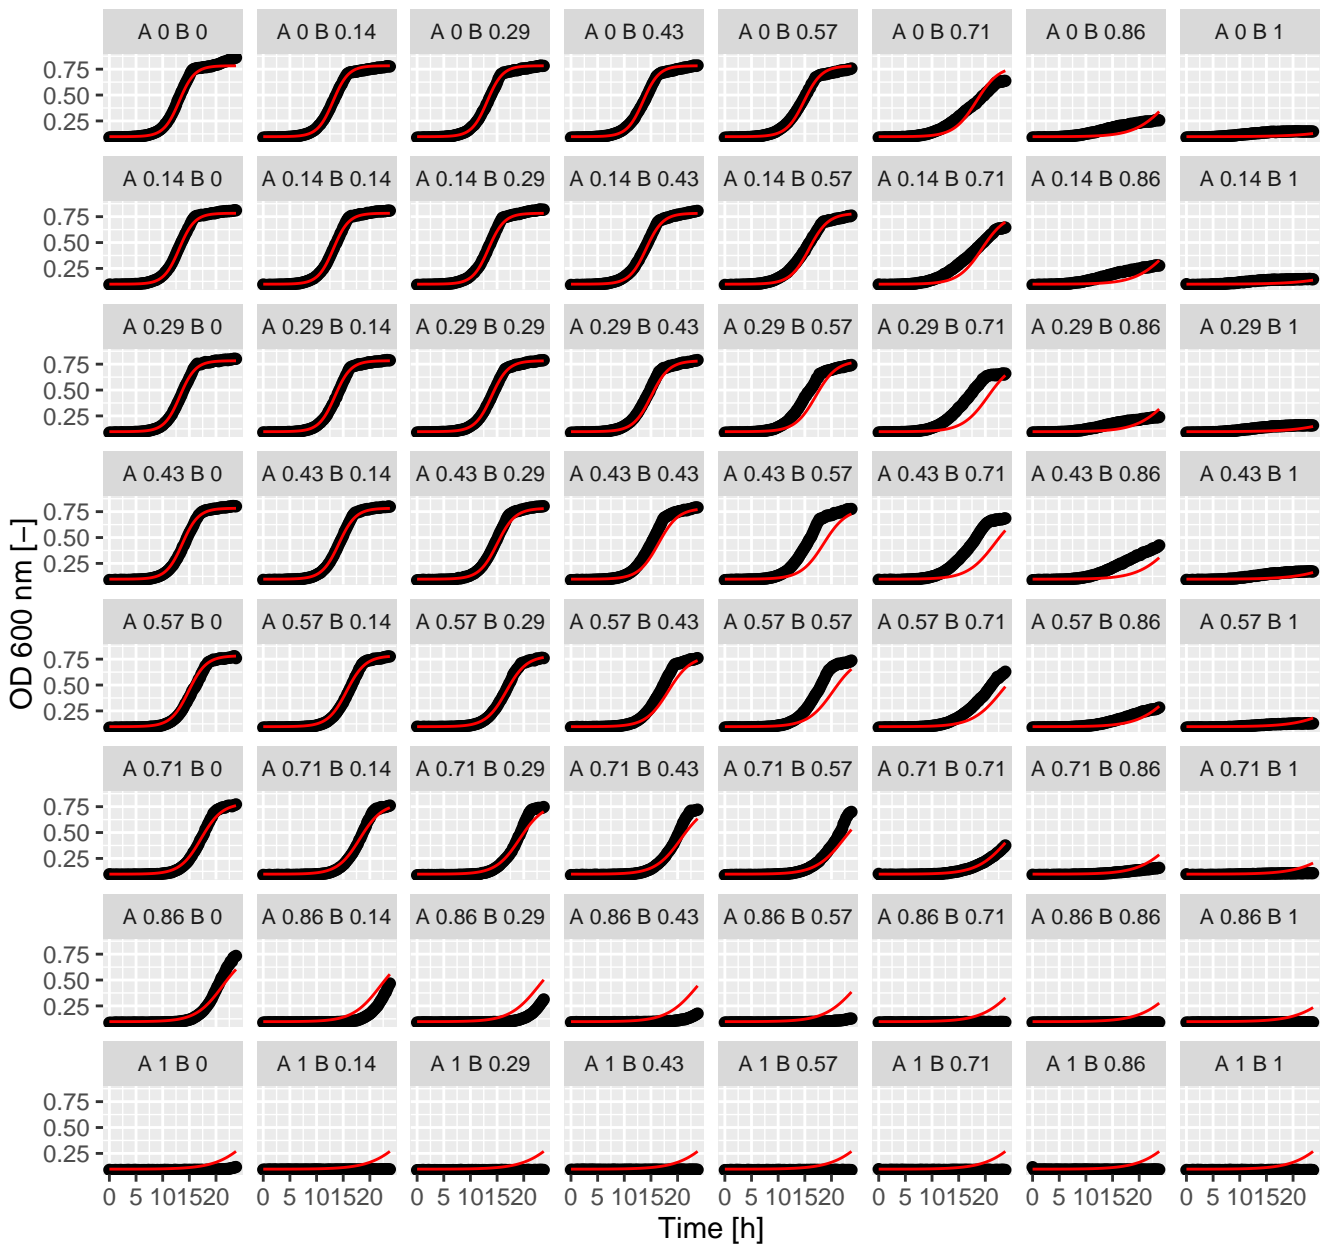

Bro.Bro (= Ax.Bx) Greco  
alpha = 0.29

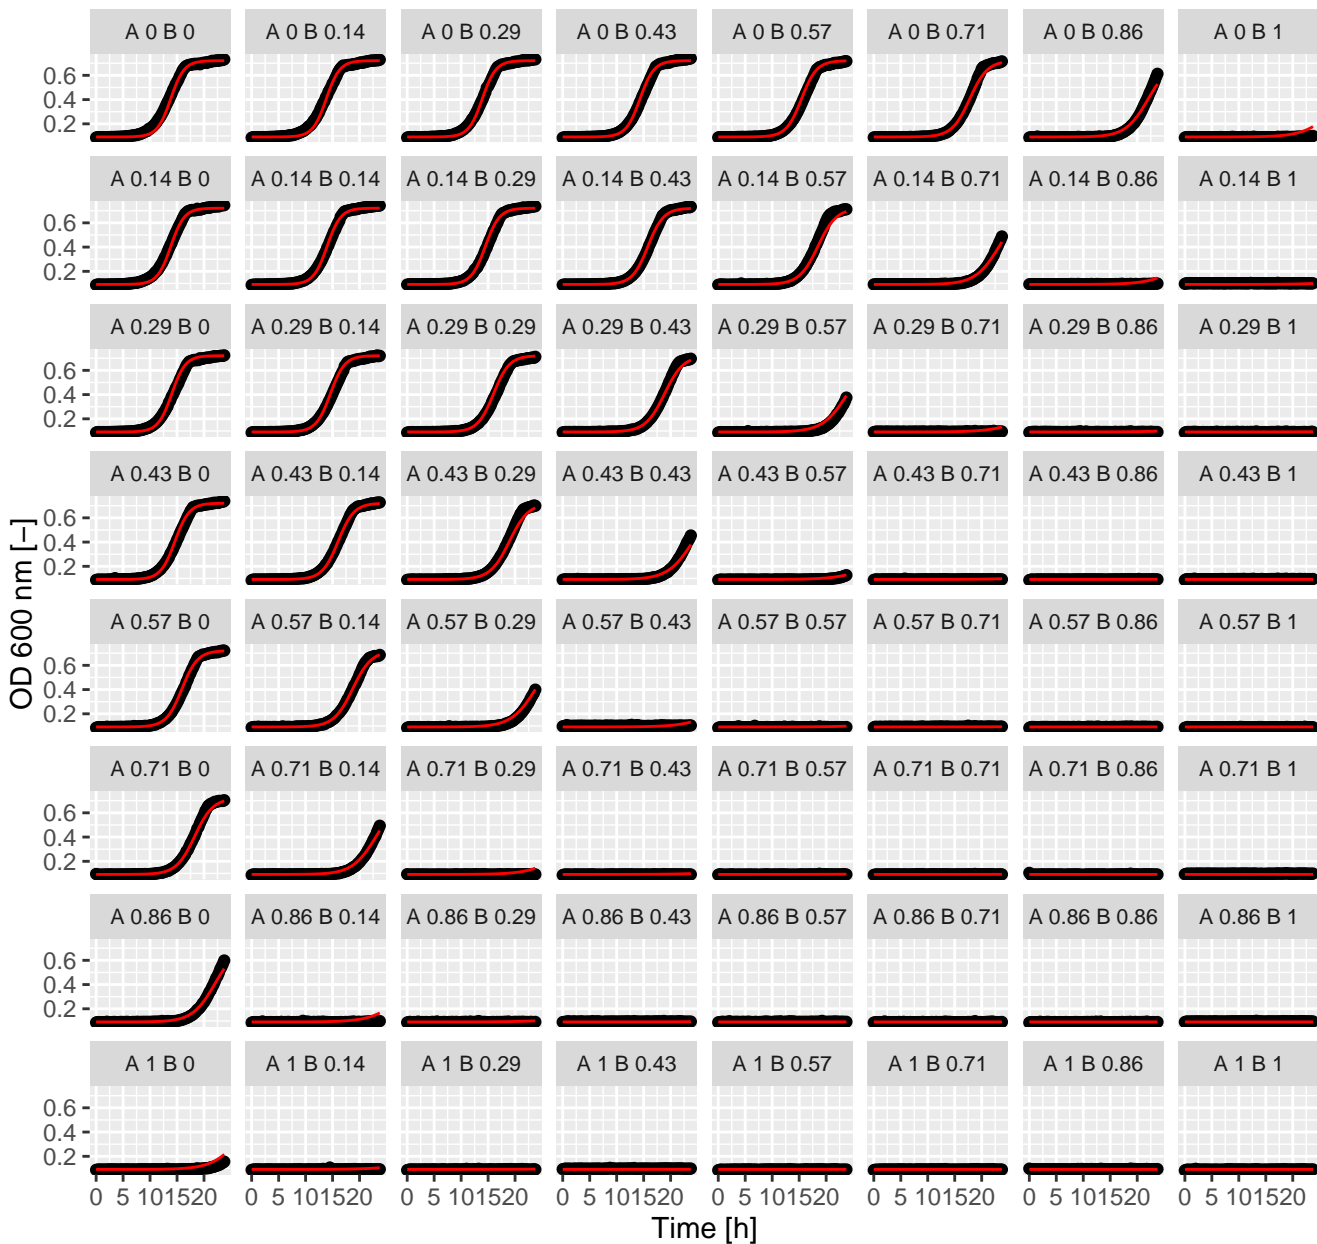

Ben.Tun (= Ax.Bx) Greco  
alpha = -0.97

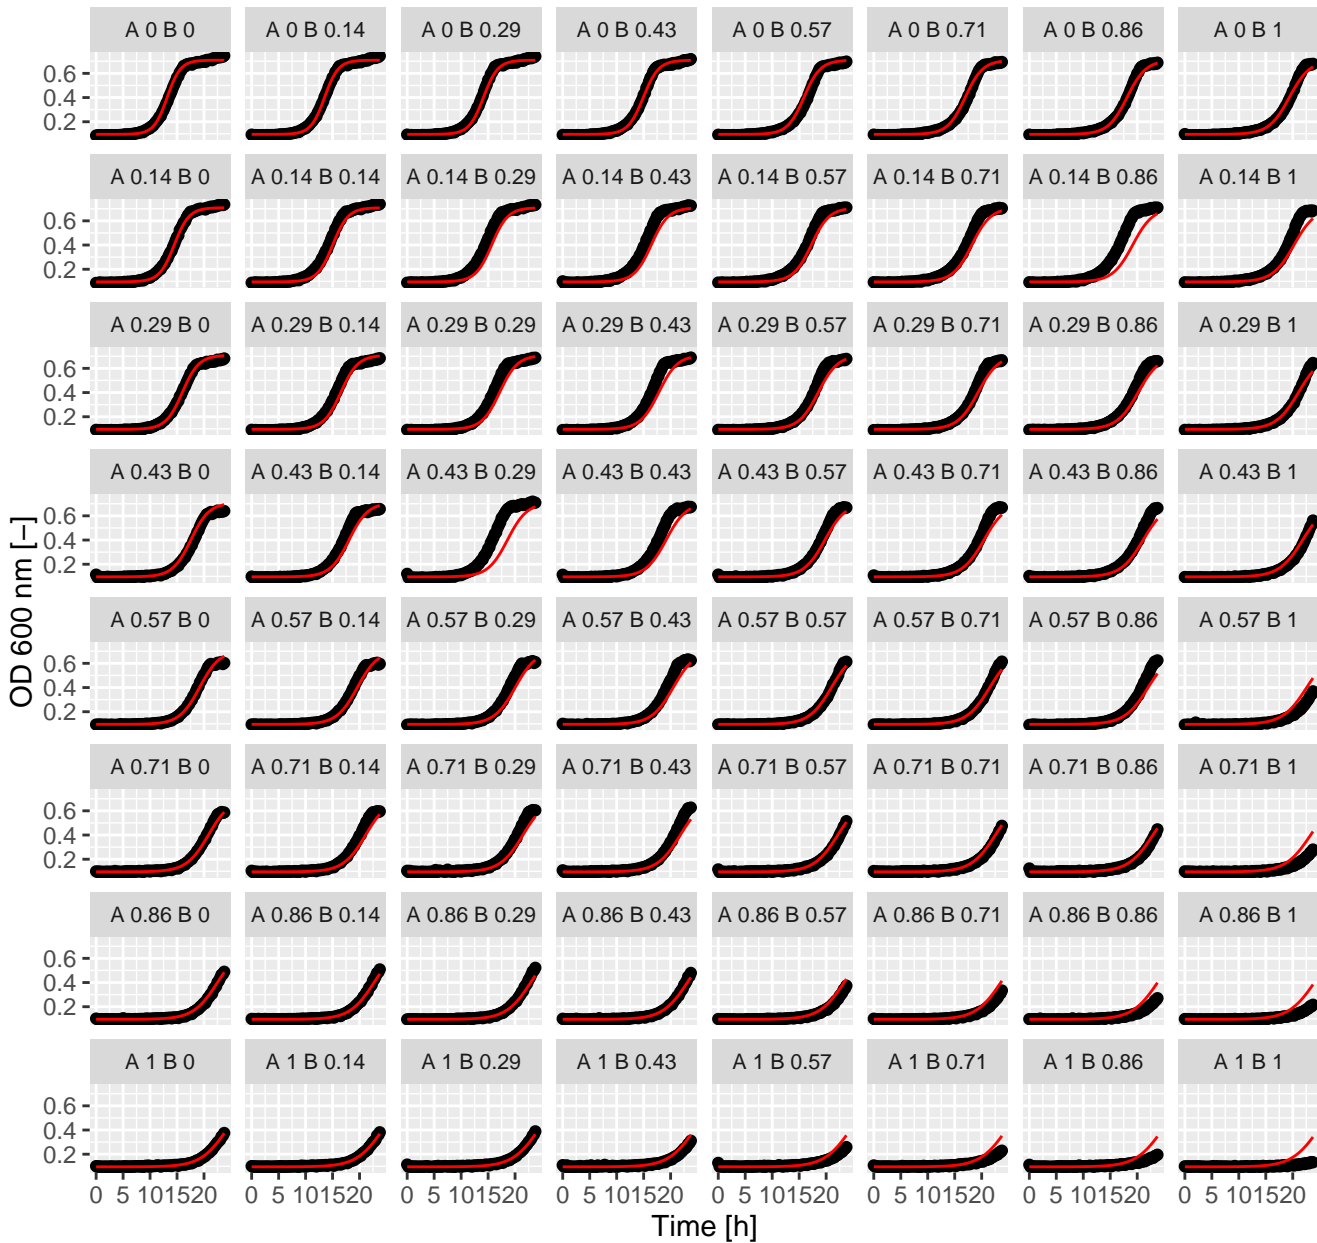

Ben.Ter (= Ax.Bx) Greco  
alpha = 0.15

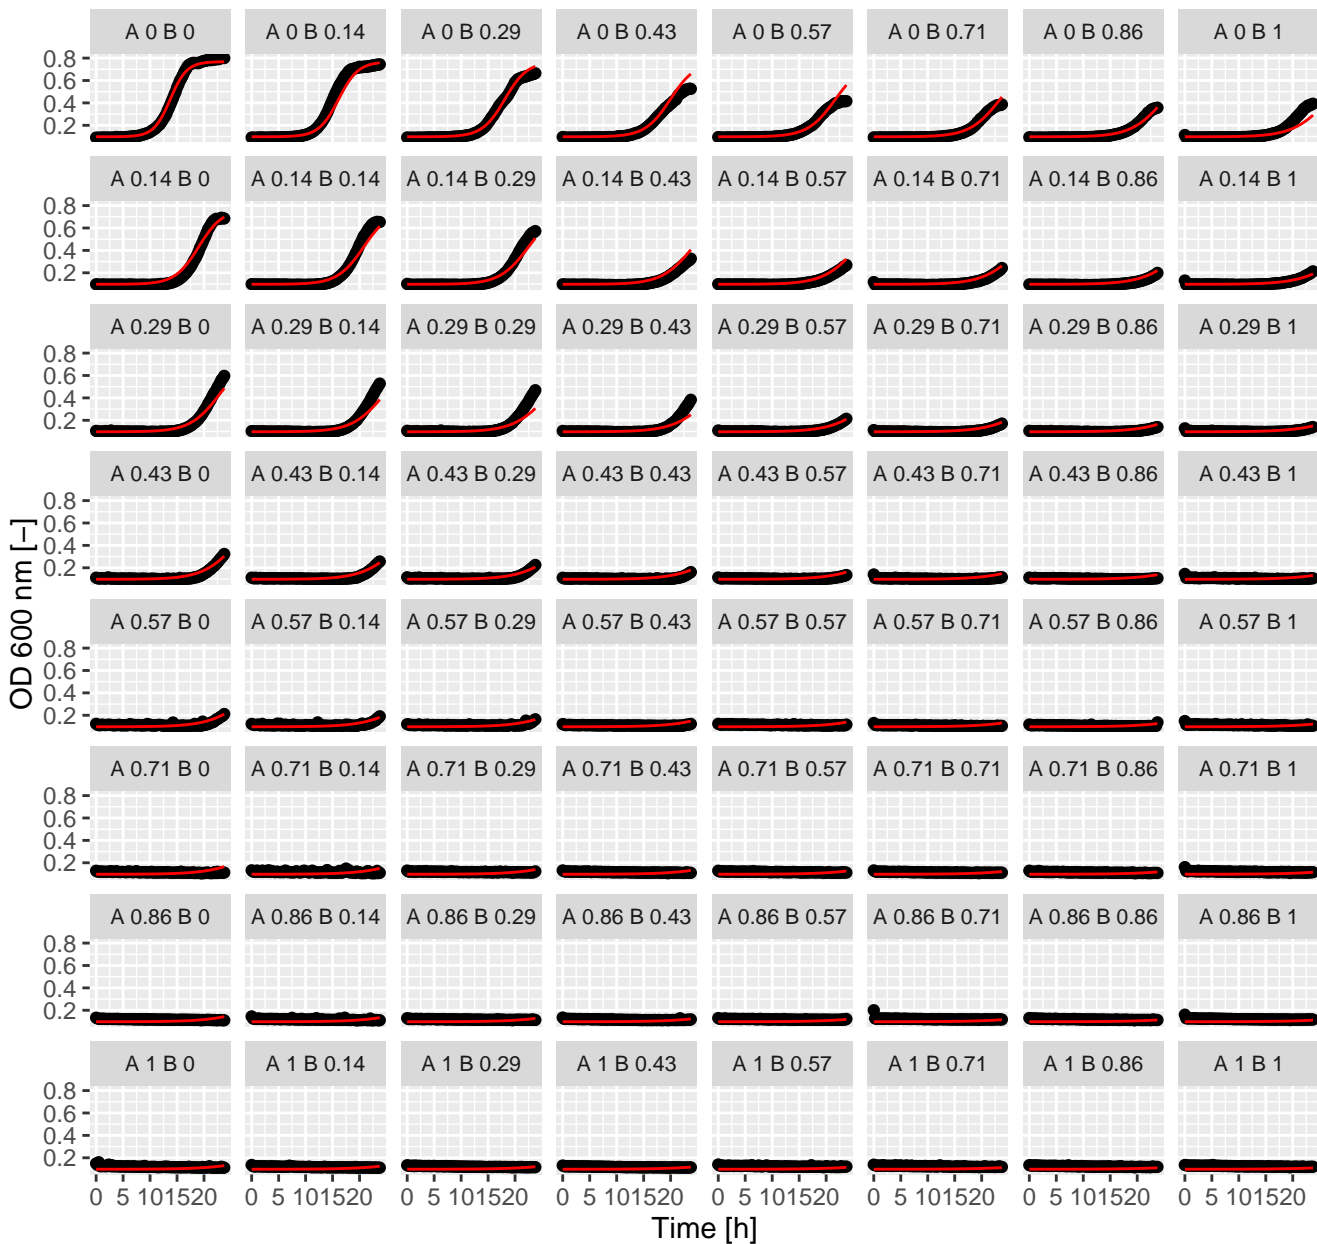

Ben.Tac (= Ax.Bx) Greco  
alpha = 1.29

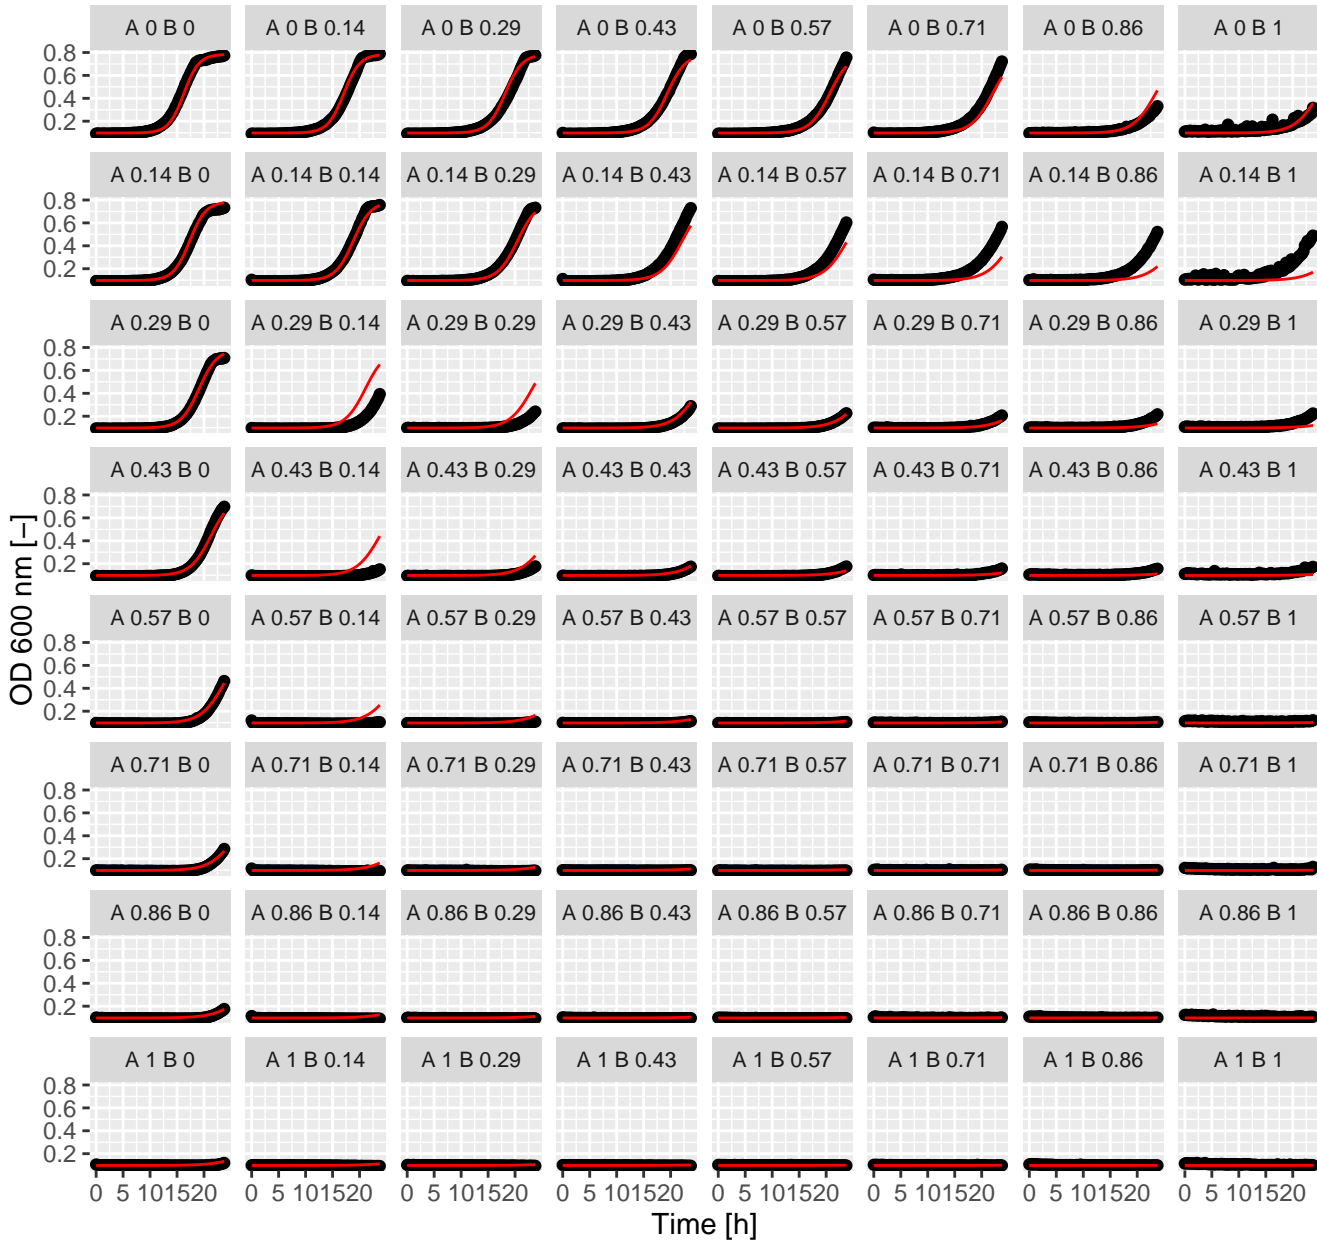



Ben.Sta (= Ax.Bx) Greco  
 $\alpha = -1.02$

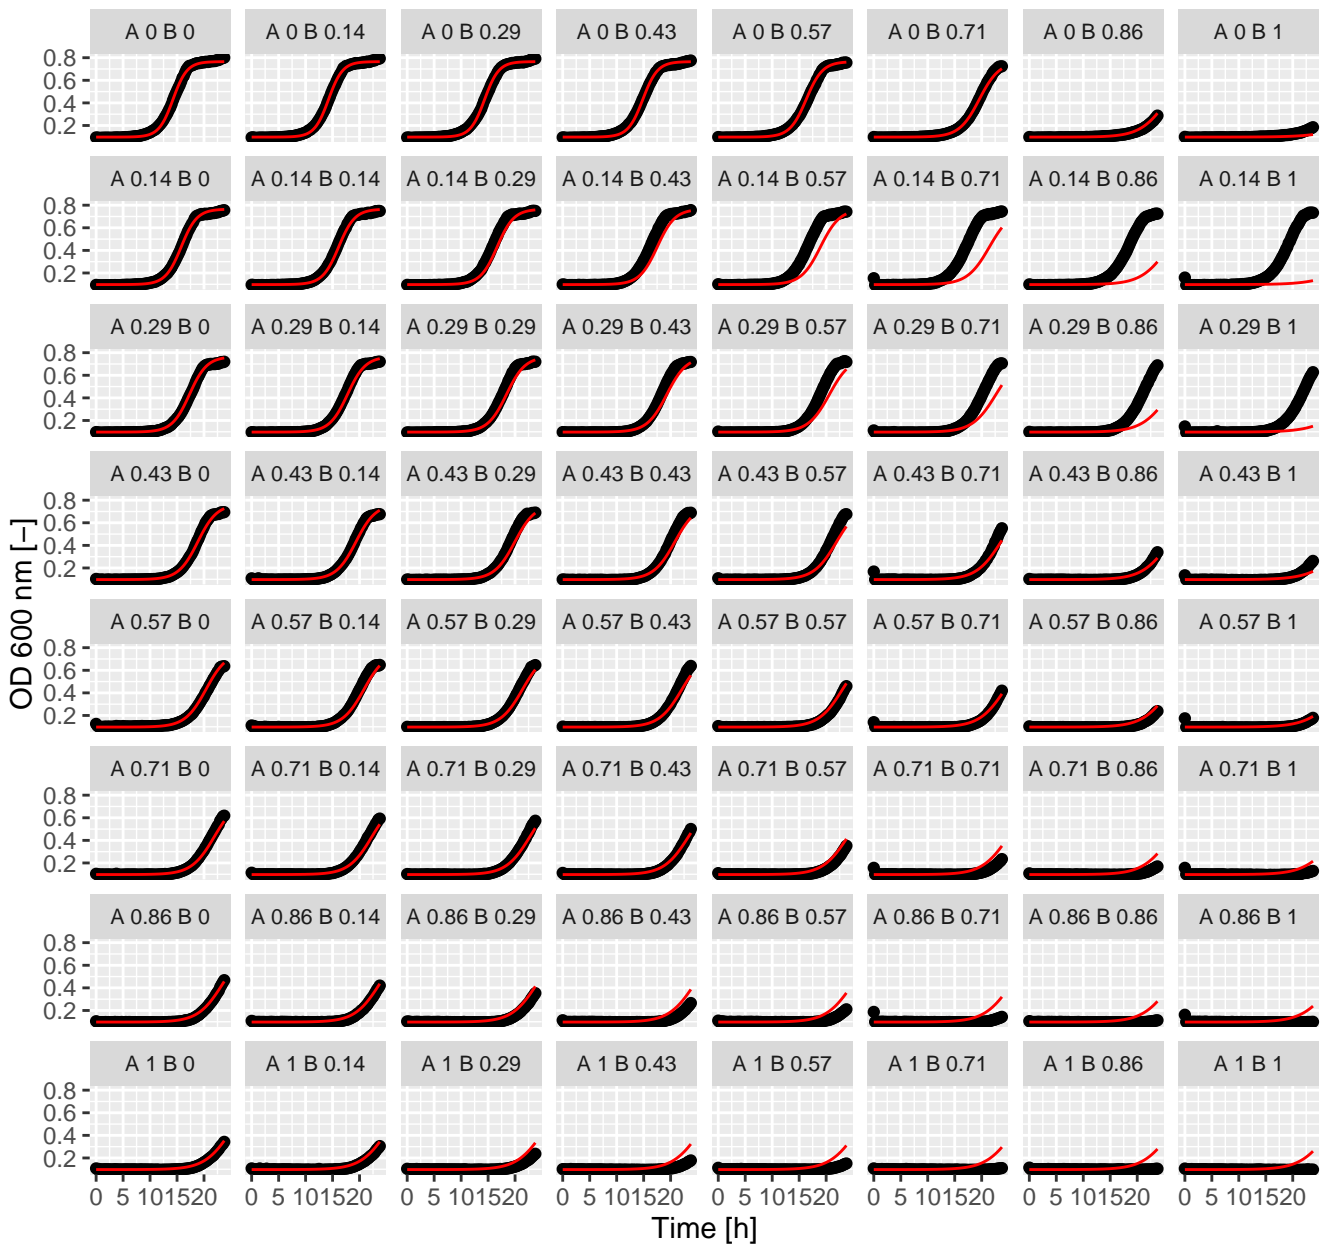

Ben.Rap (= Ax.Bx) Greco  
 $\alpha = -0.58$

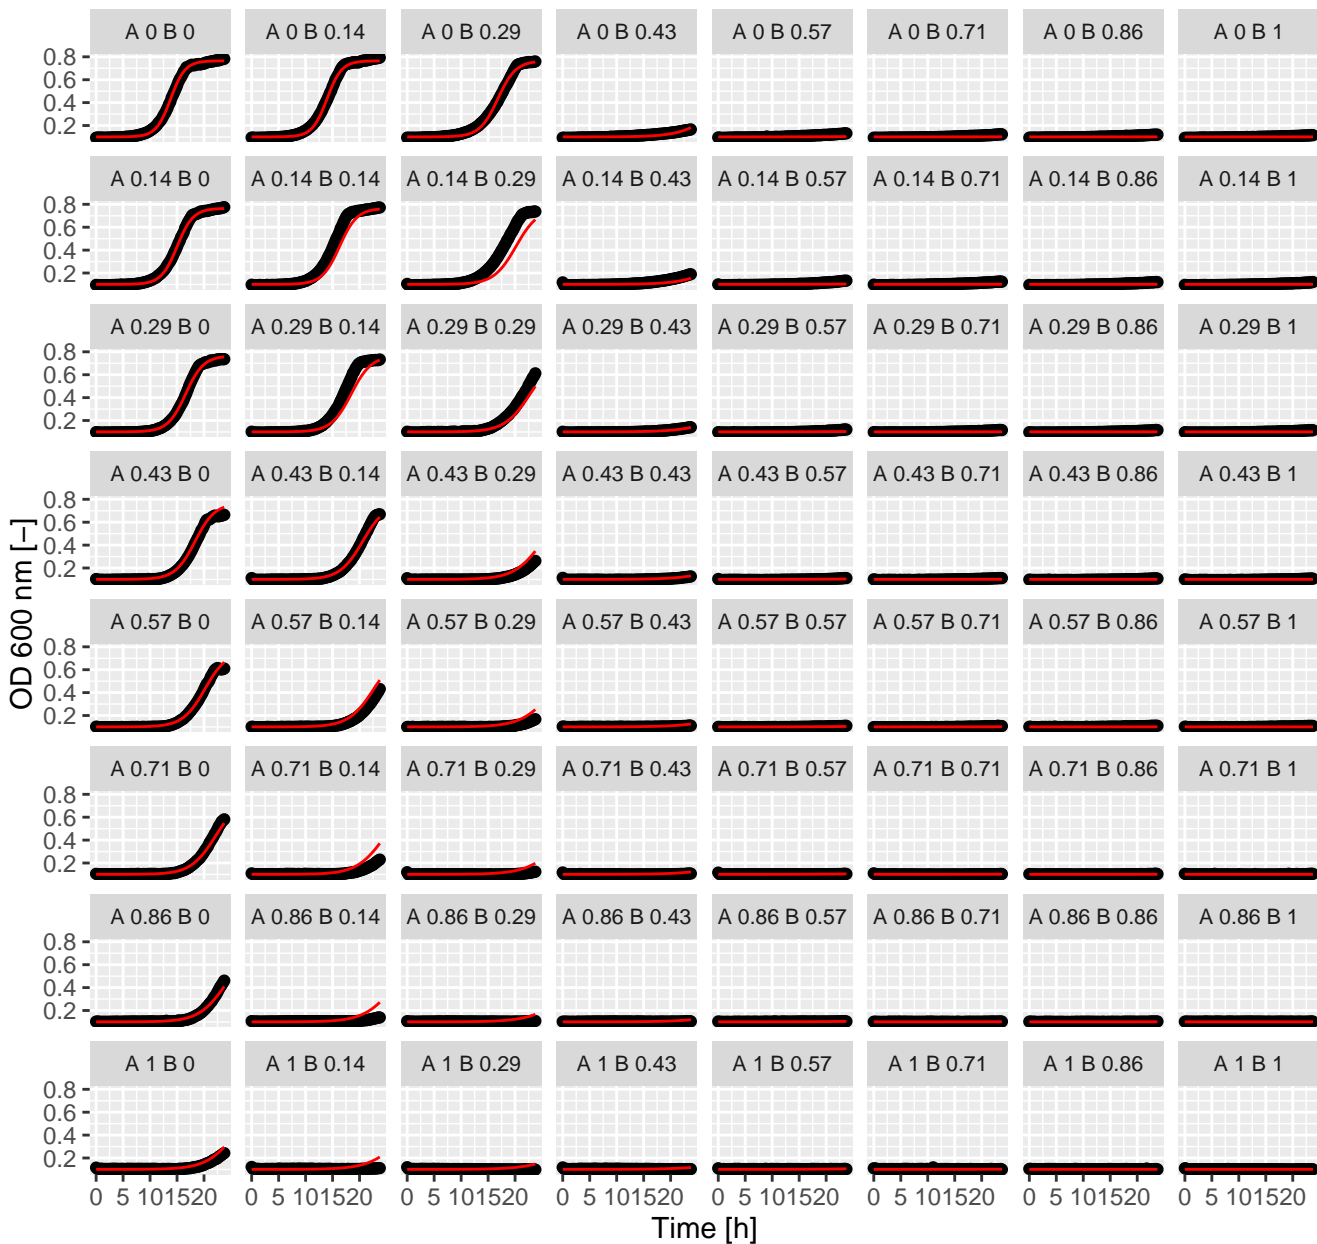

Ben.Rad (= Ax.Bx) Greco  
alpha = 0.17

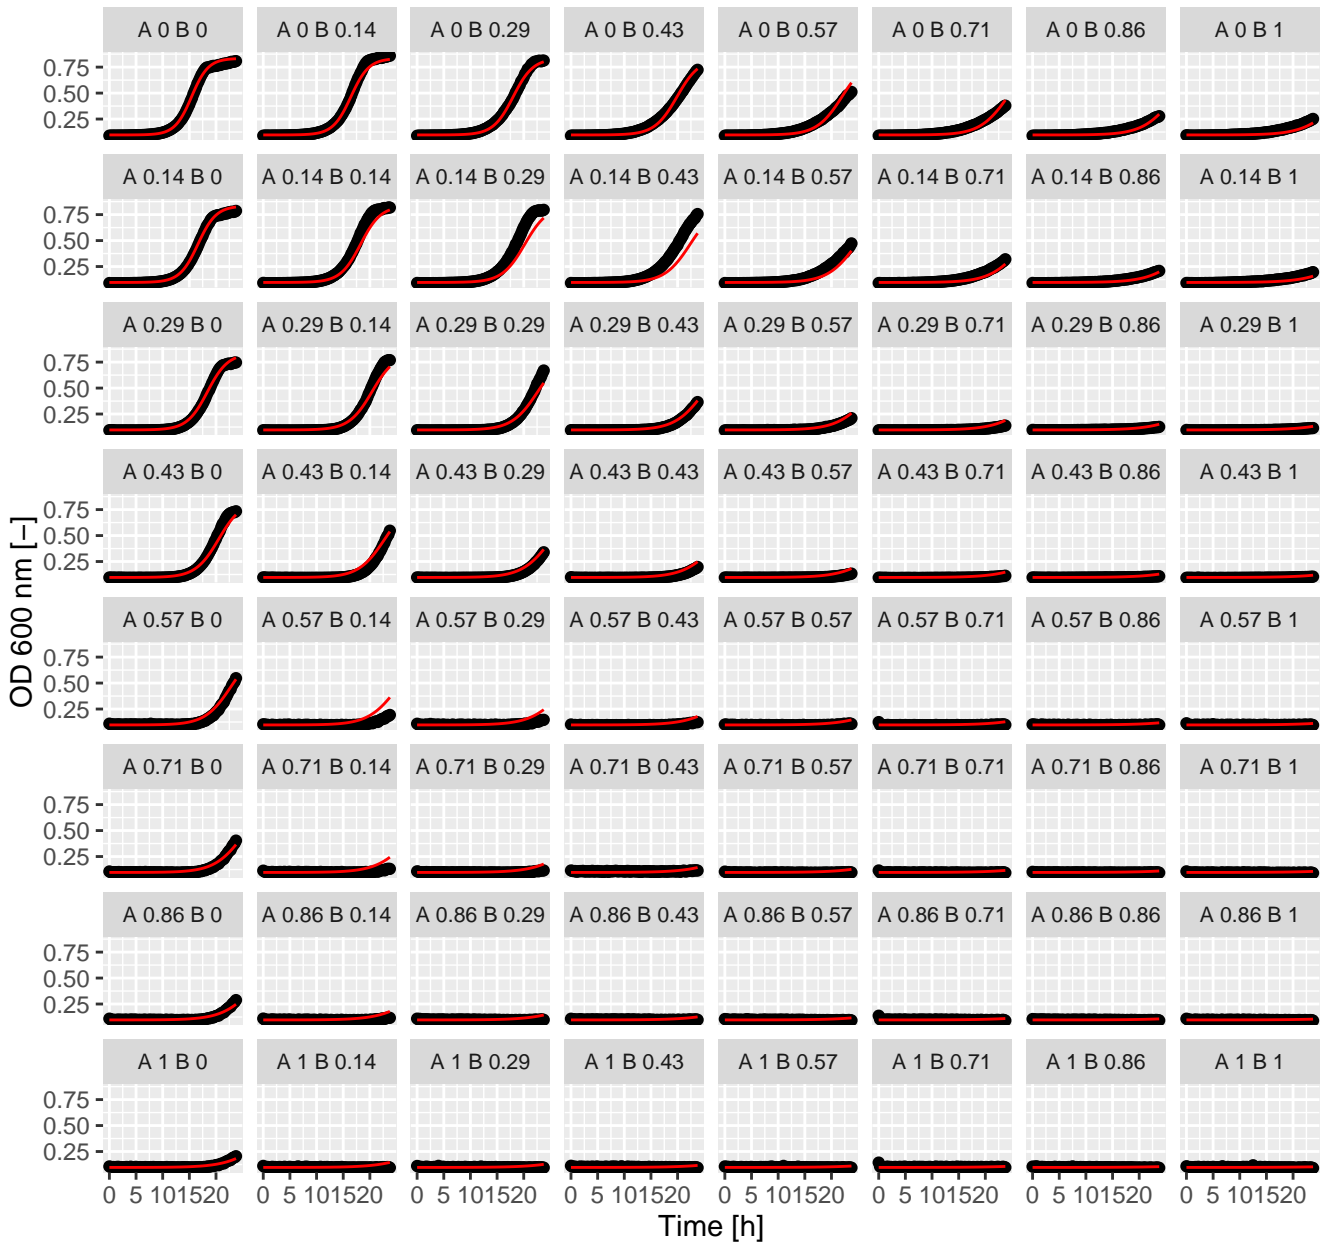

Ben.Qmy (= Ax.Bx) Greco  
alpha = 10.55

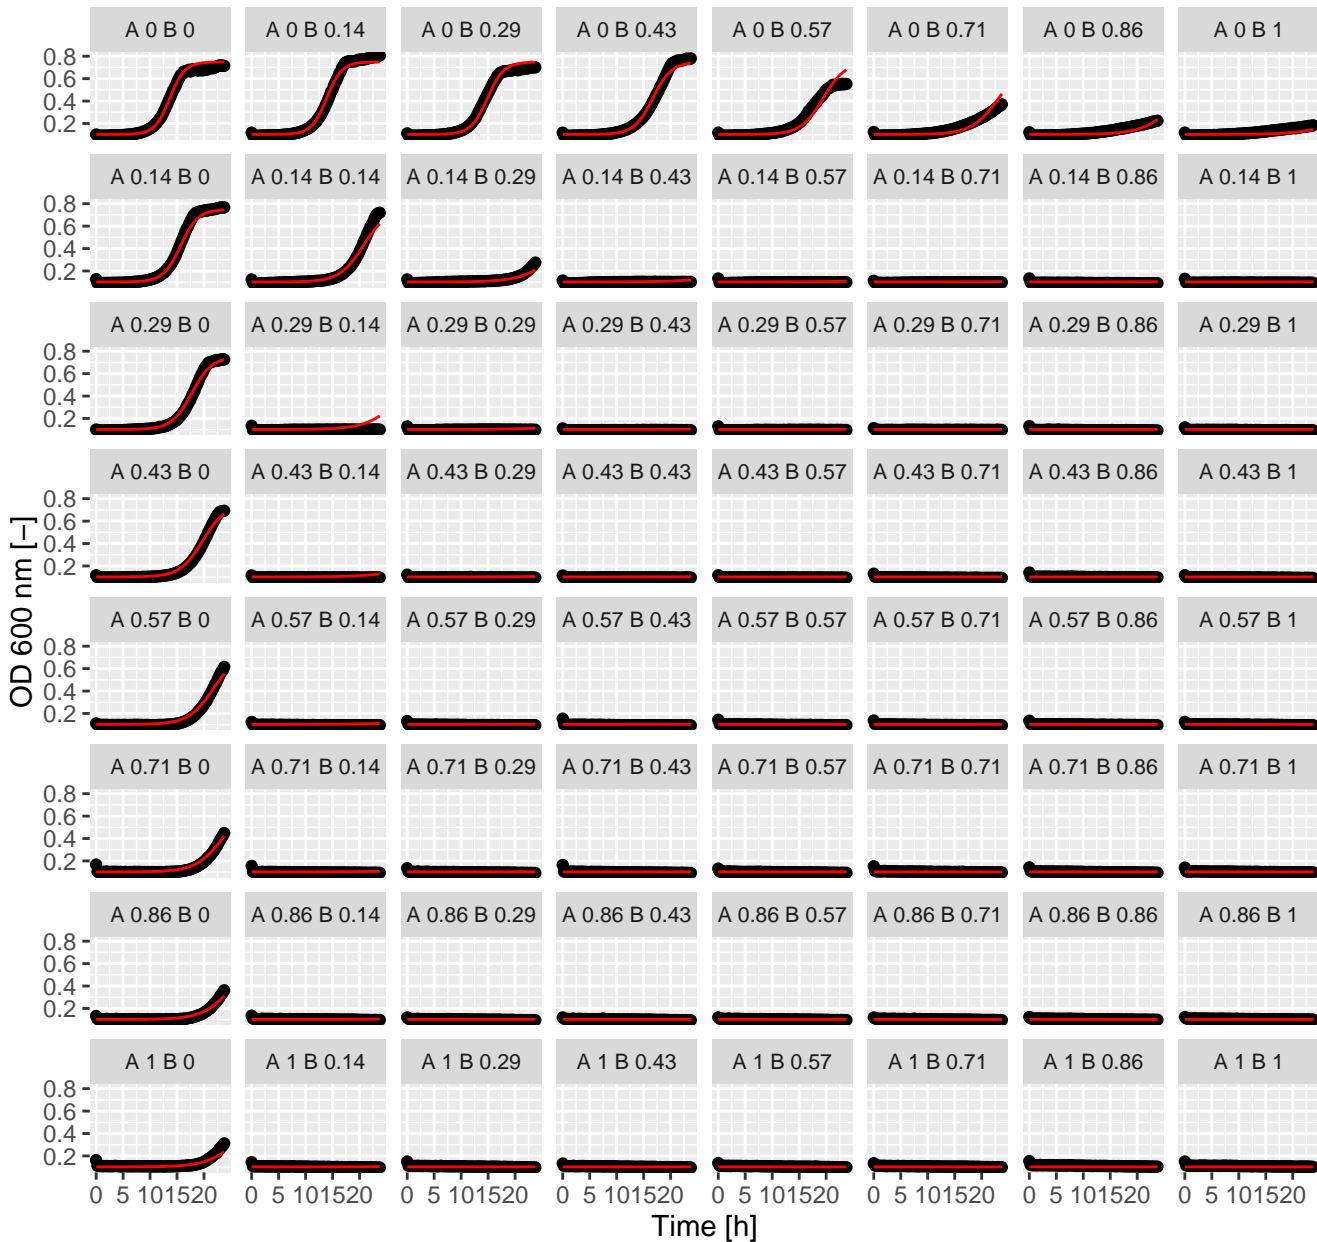

# Ben.Pen (= Ax.Bx) Greco alpha = 6.98

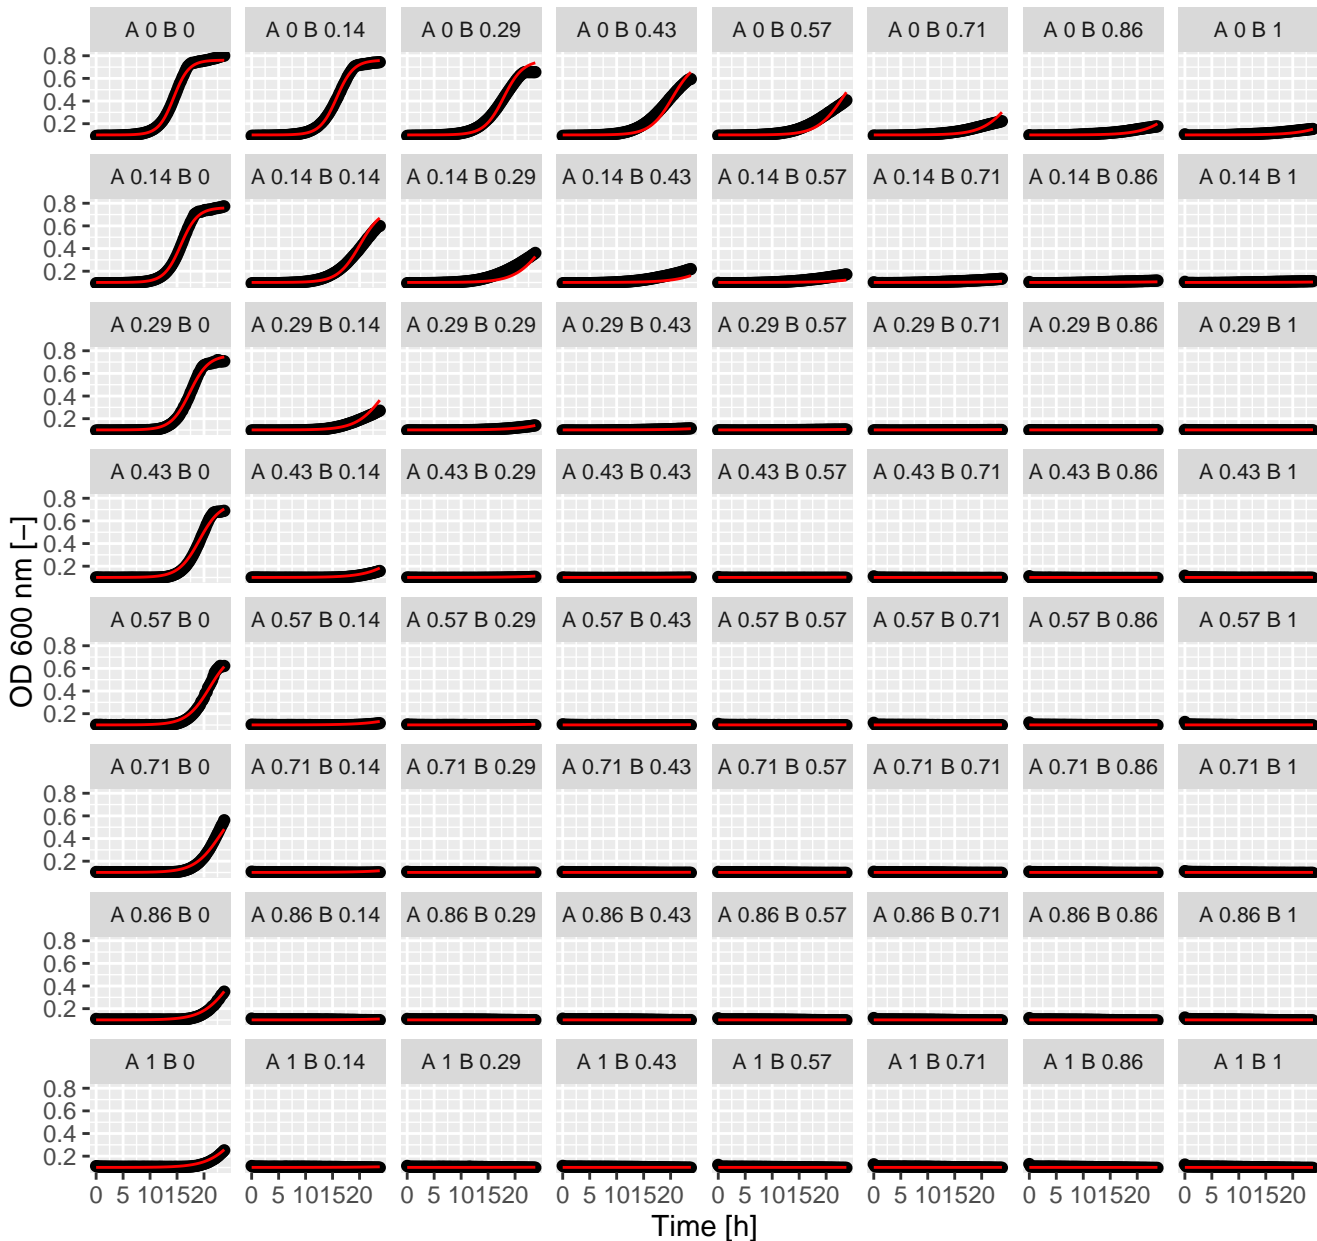

Ben.Myr (= Ax.Bx) Greco  
alpha = -0.6

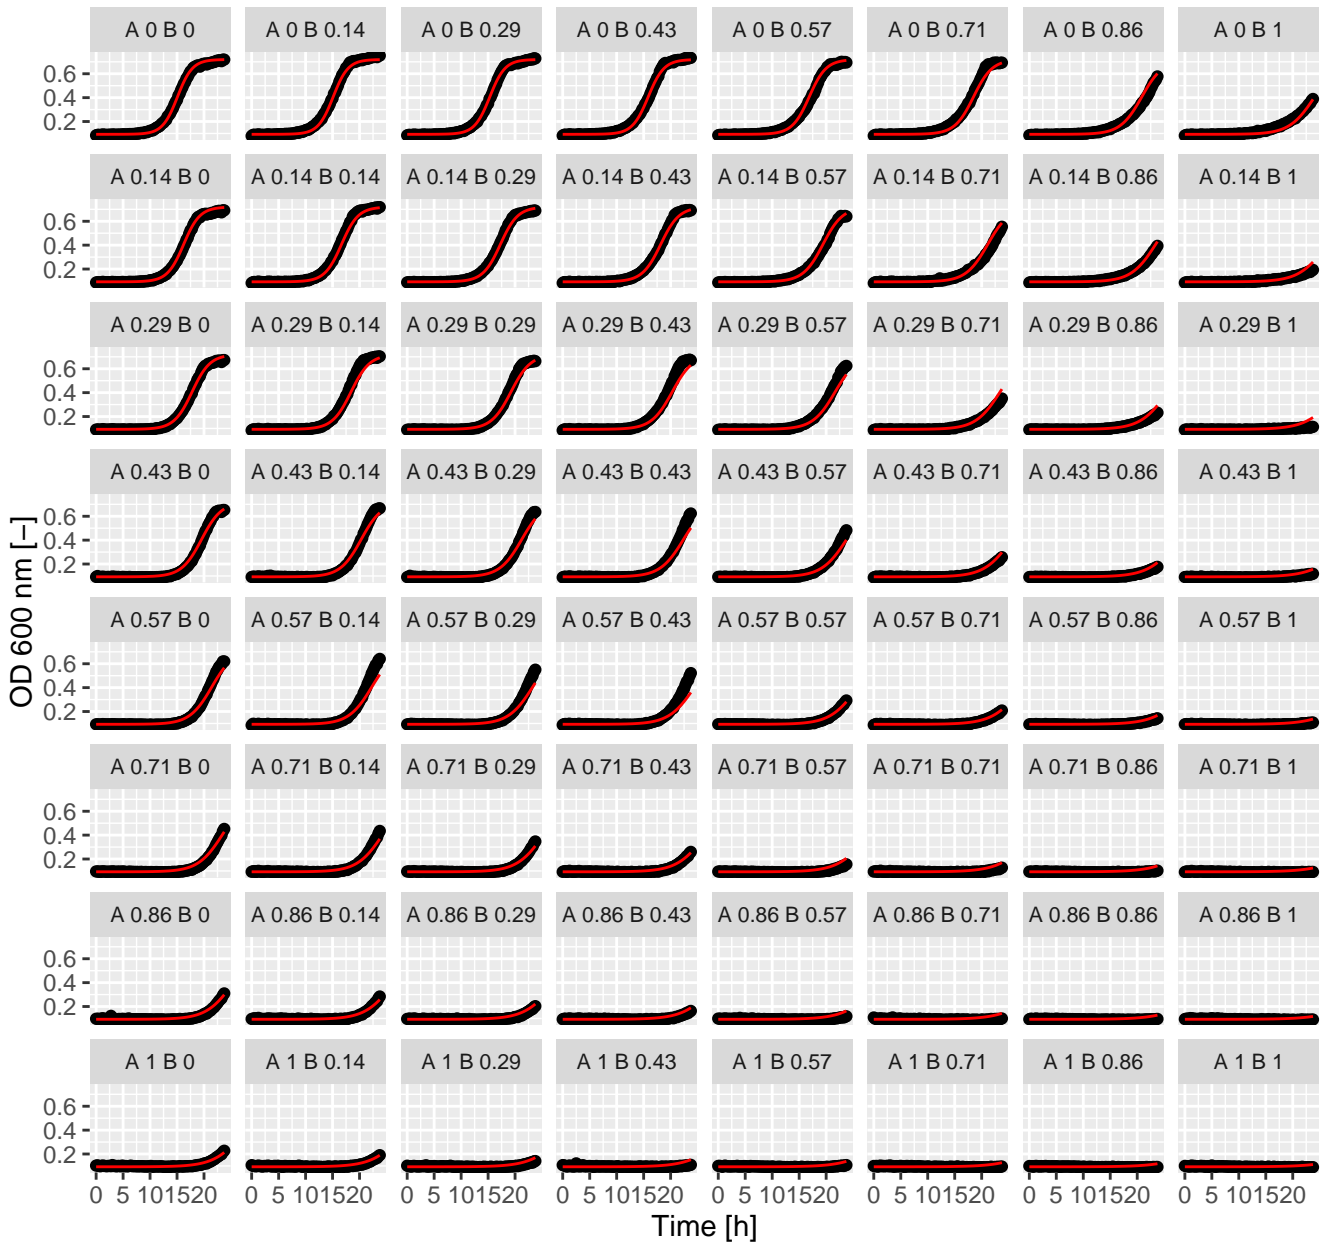

Ben.MMS (= Ax.Bx) Greco  
 $\alpha = -0.53$

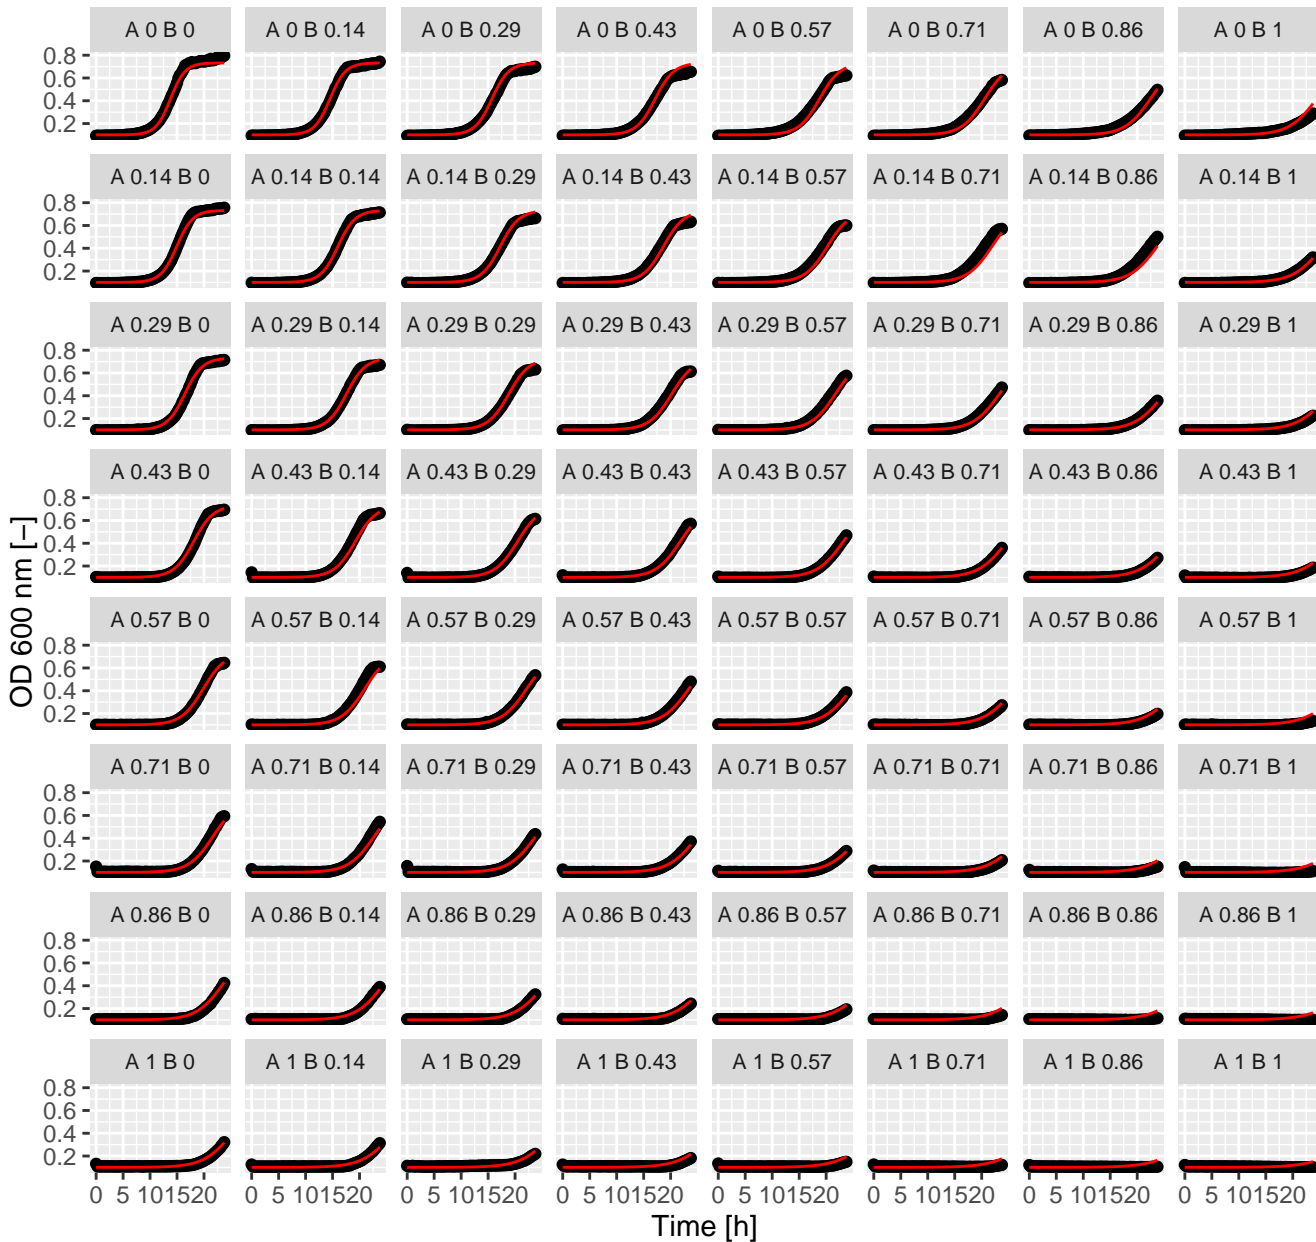

Ben.Met (= Ax.Bx) Greco  
alpha = -0.16

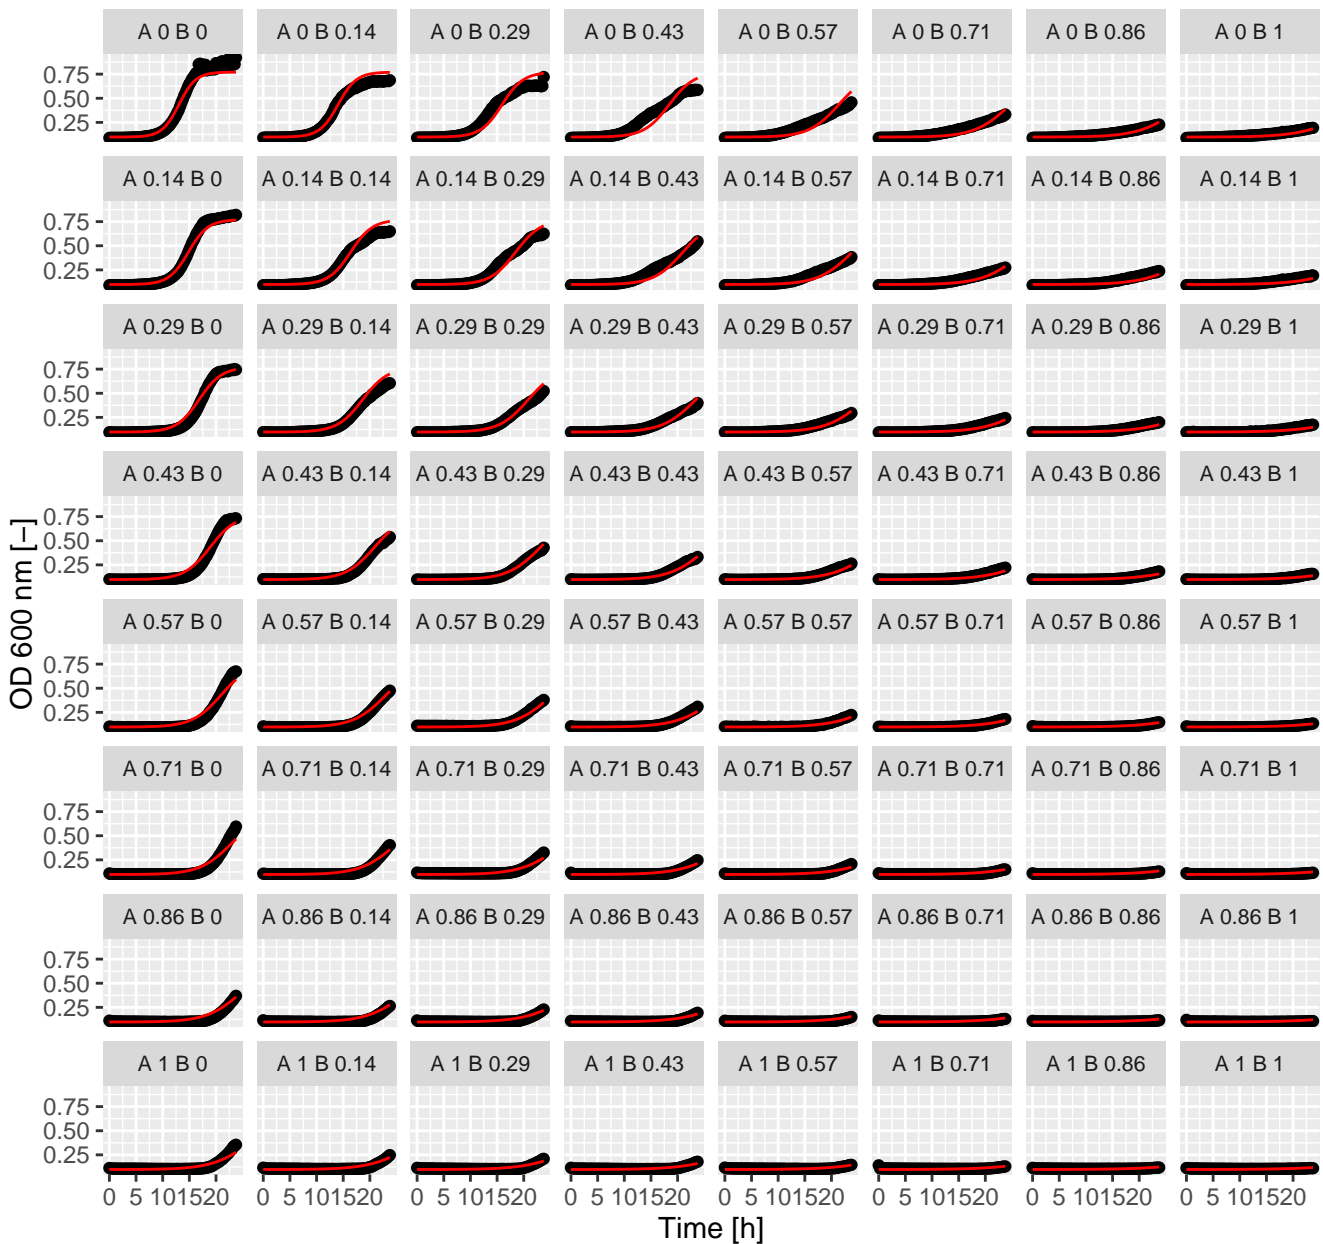



Ben.Lat (= Ax.Bx) Greco  
alpha = -1.2

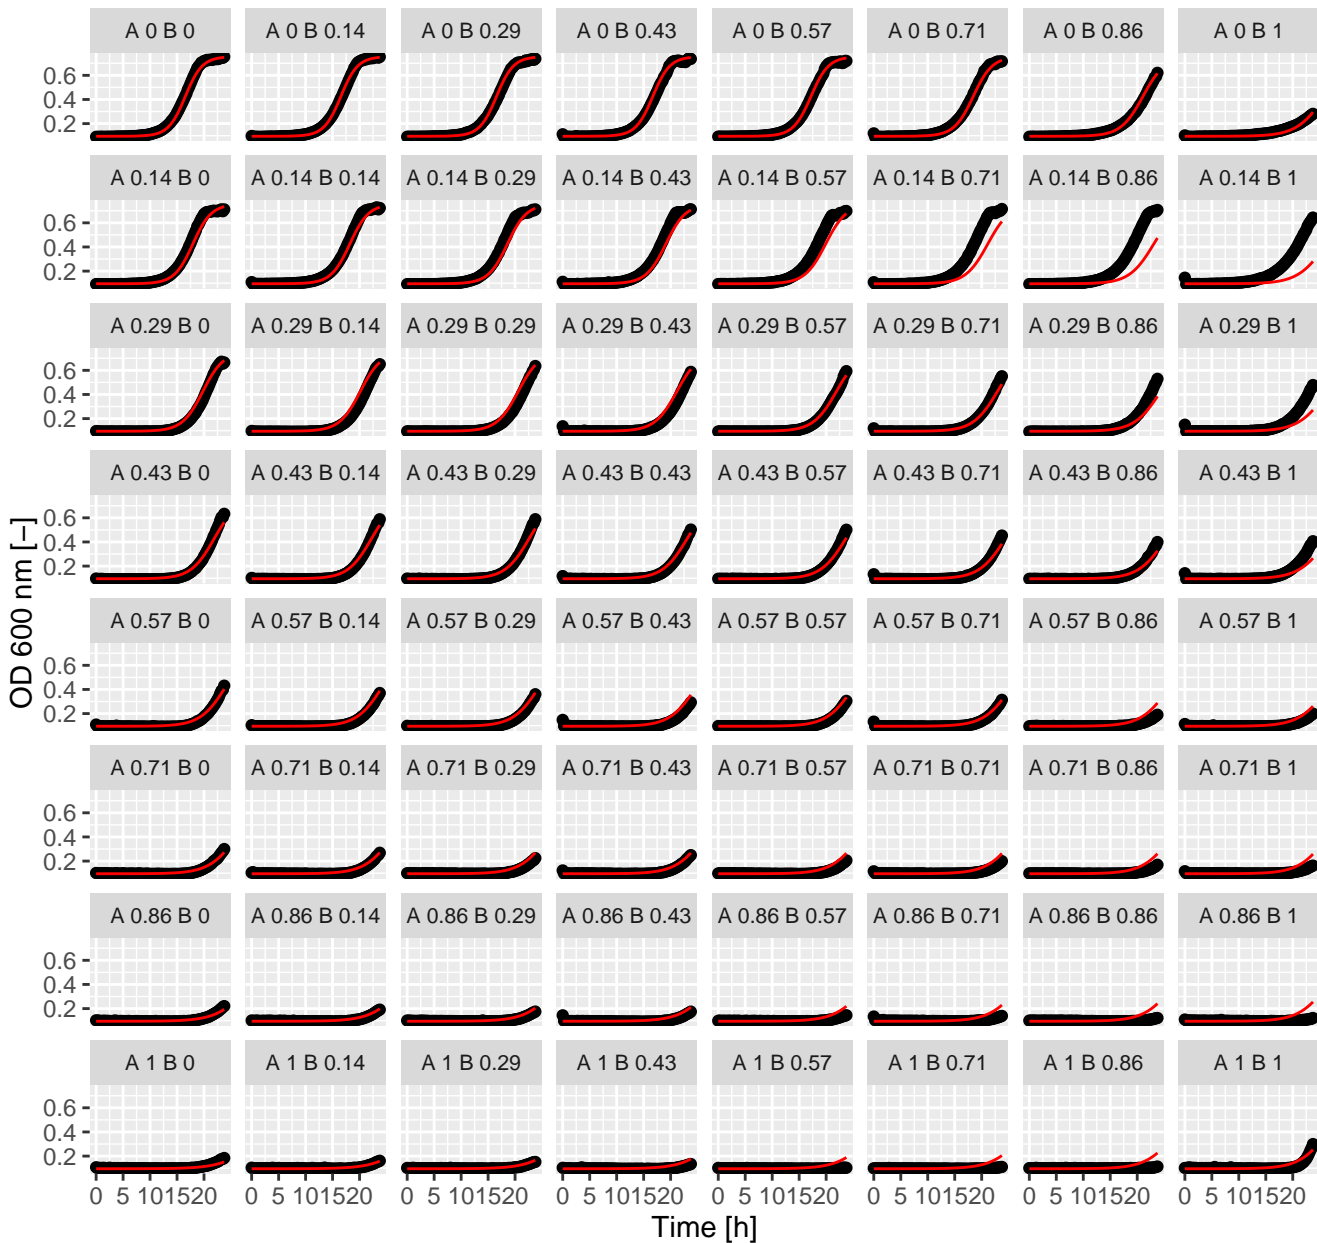

Ben.Hal (= Ax.Bx) Greco  
 $\alpha = -1.21$

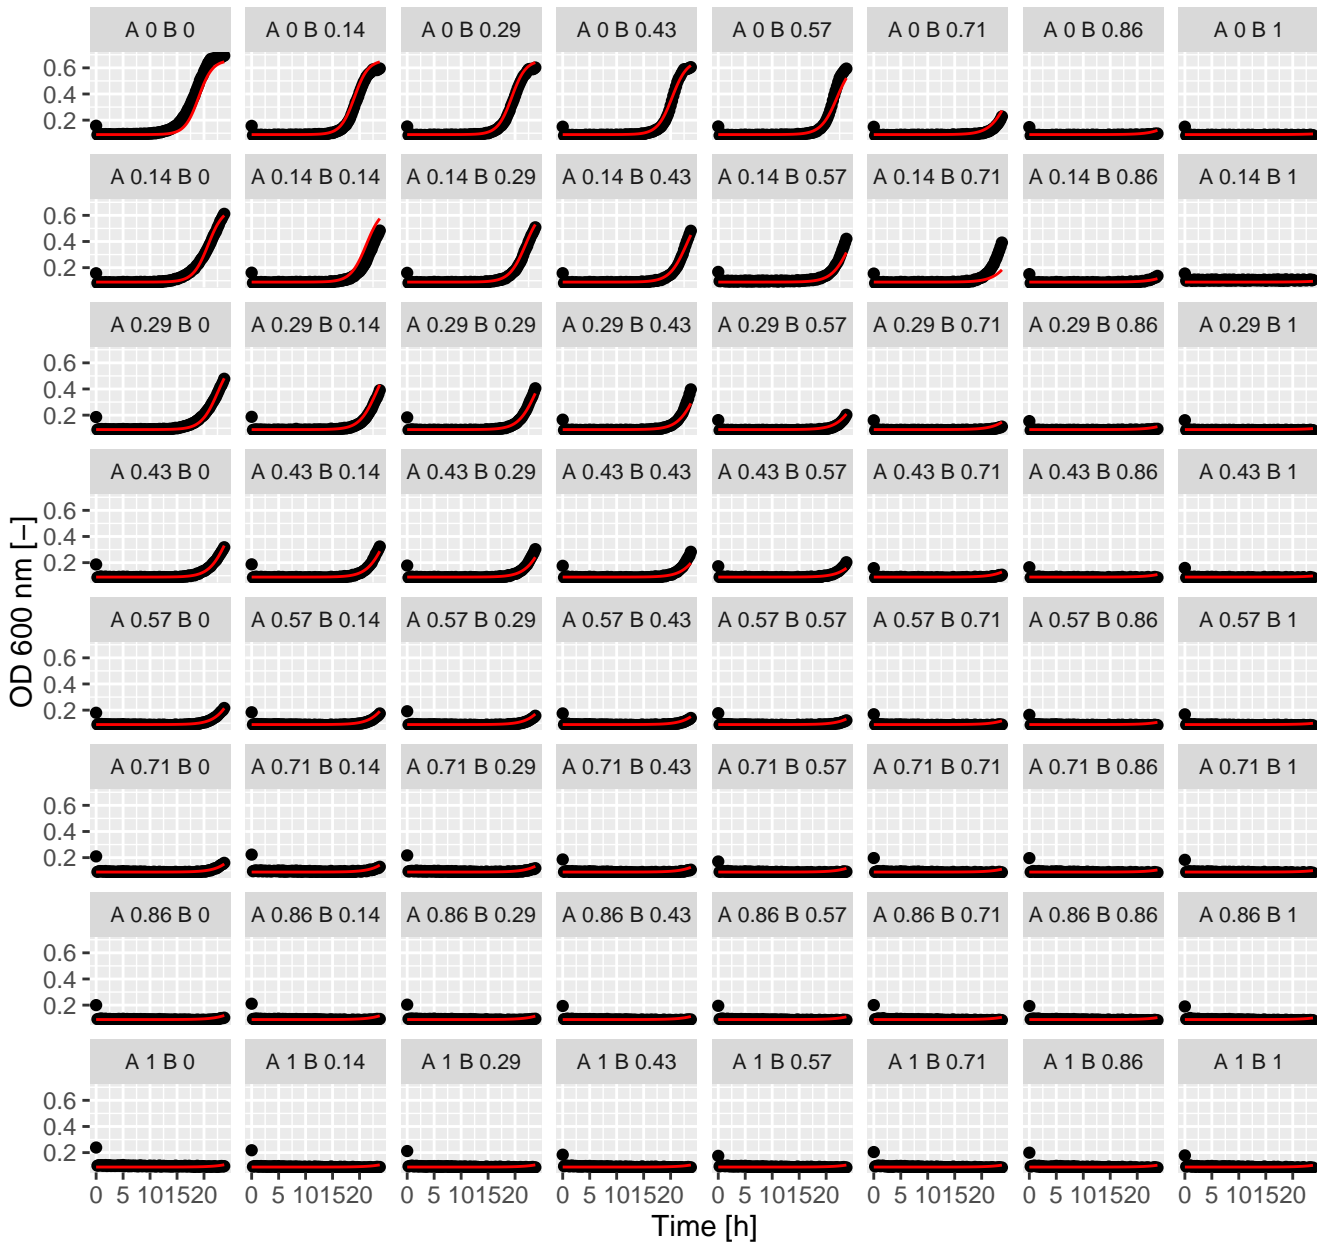

Ben.Fen (= Ax.Bx) Greco  
alpha = -0.3

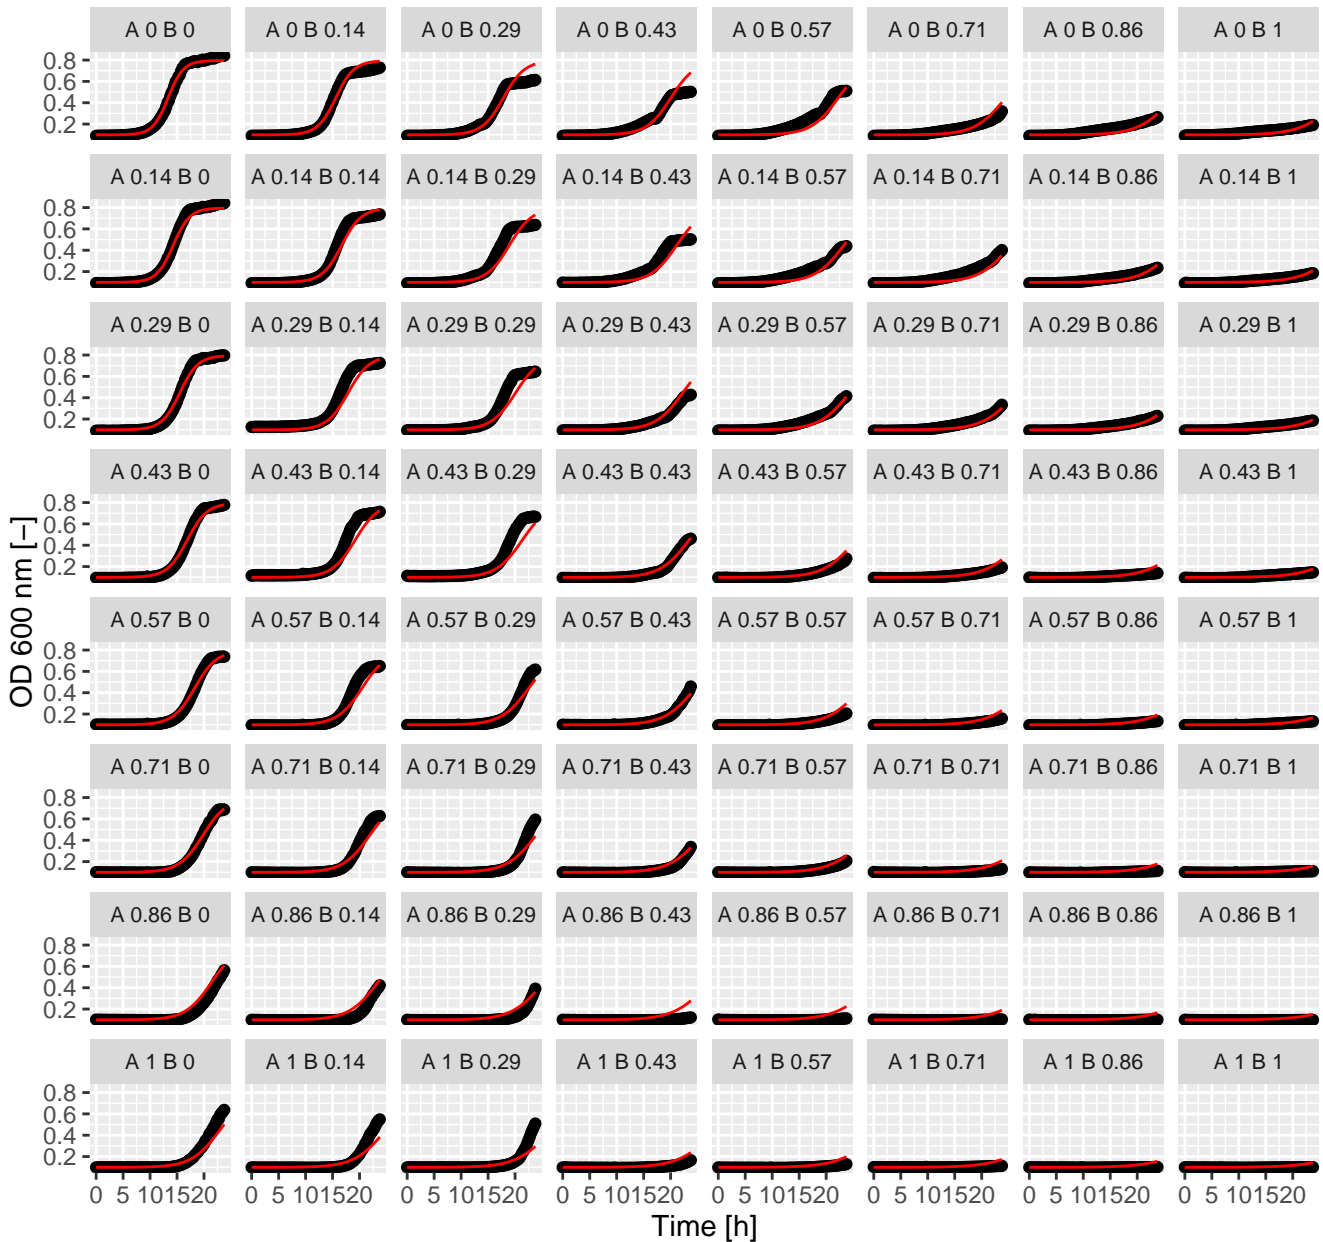

Ben.Dyc (= Ax.Bx) Greco  
alpha = -0.36

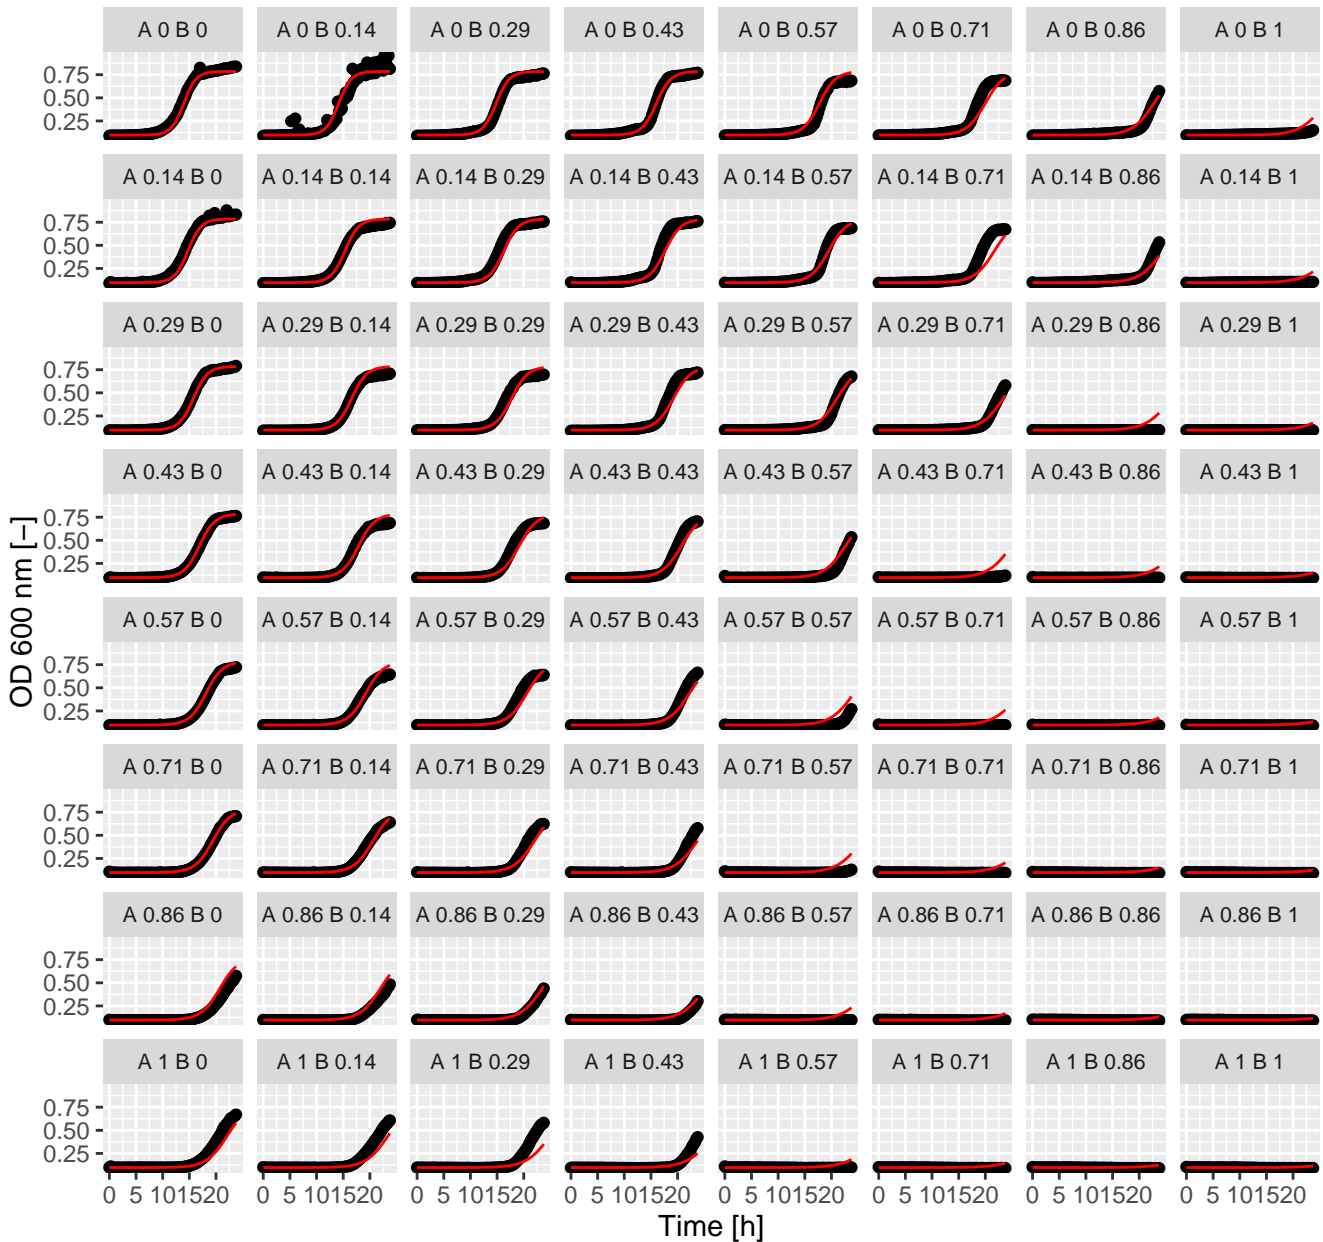

Ben.Cyc (= Ax.Bx) Greco  
alpha = -0.75

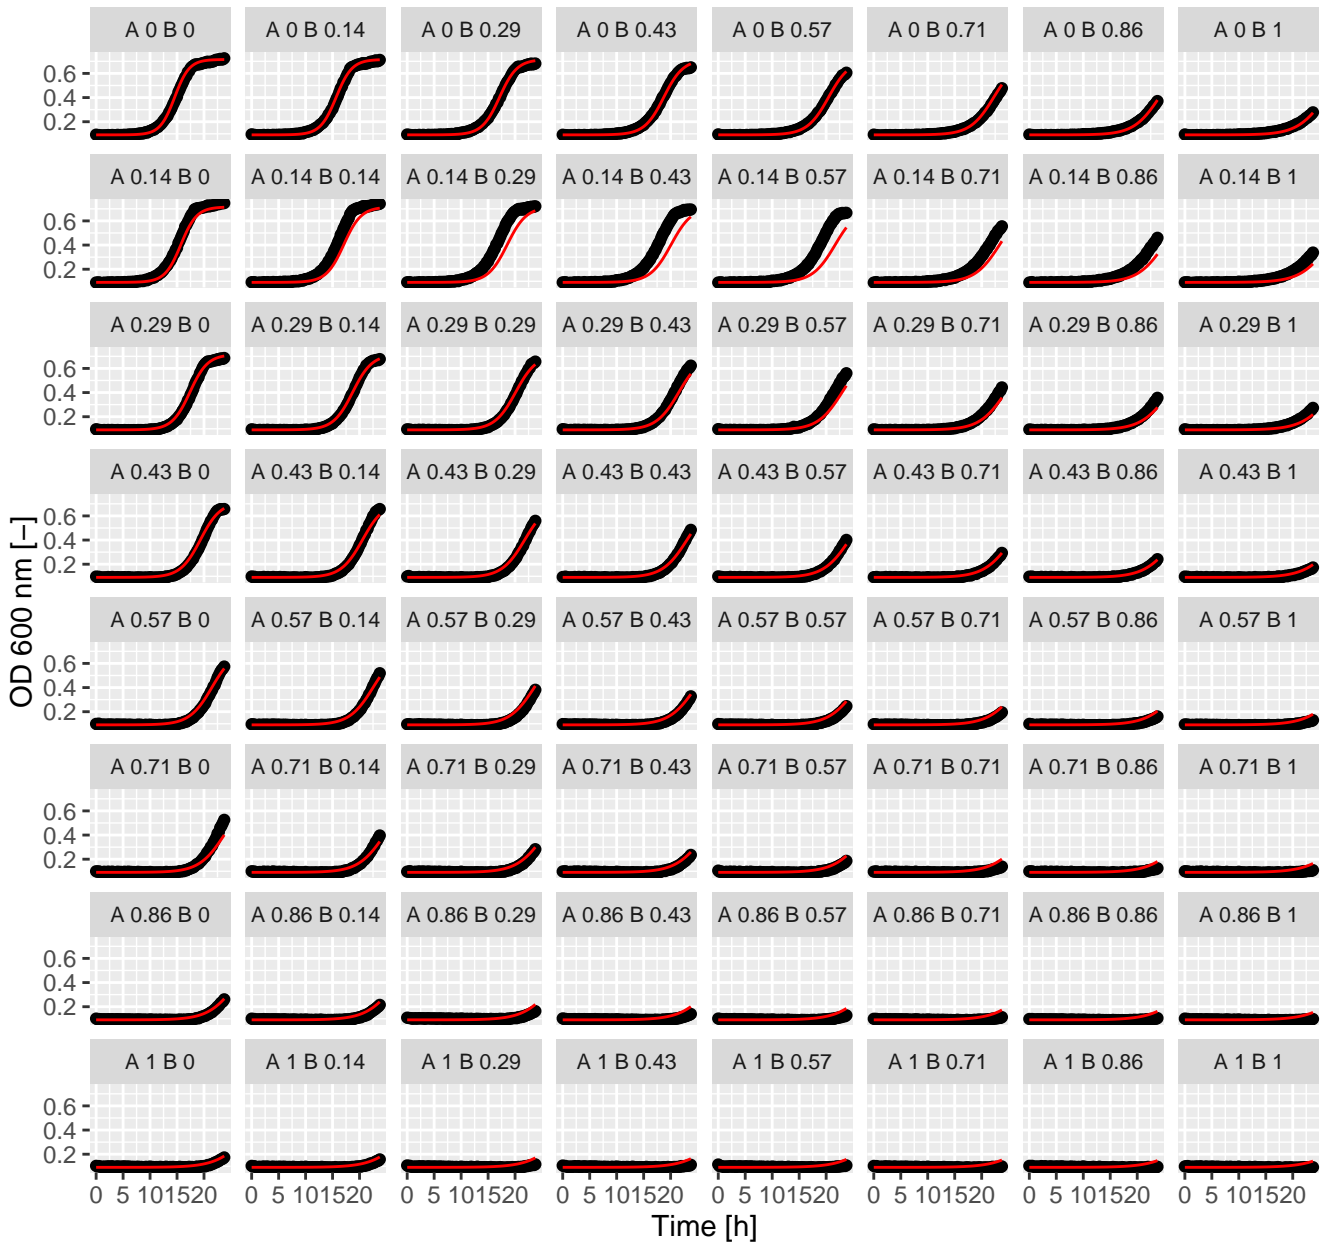

Ben.Cis (= Ax.Bx) Greco  
alpha = -0.84

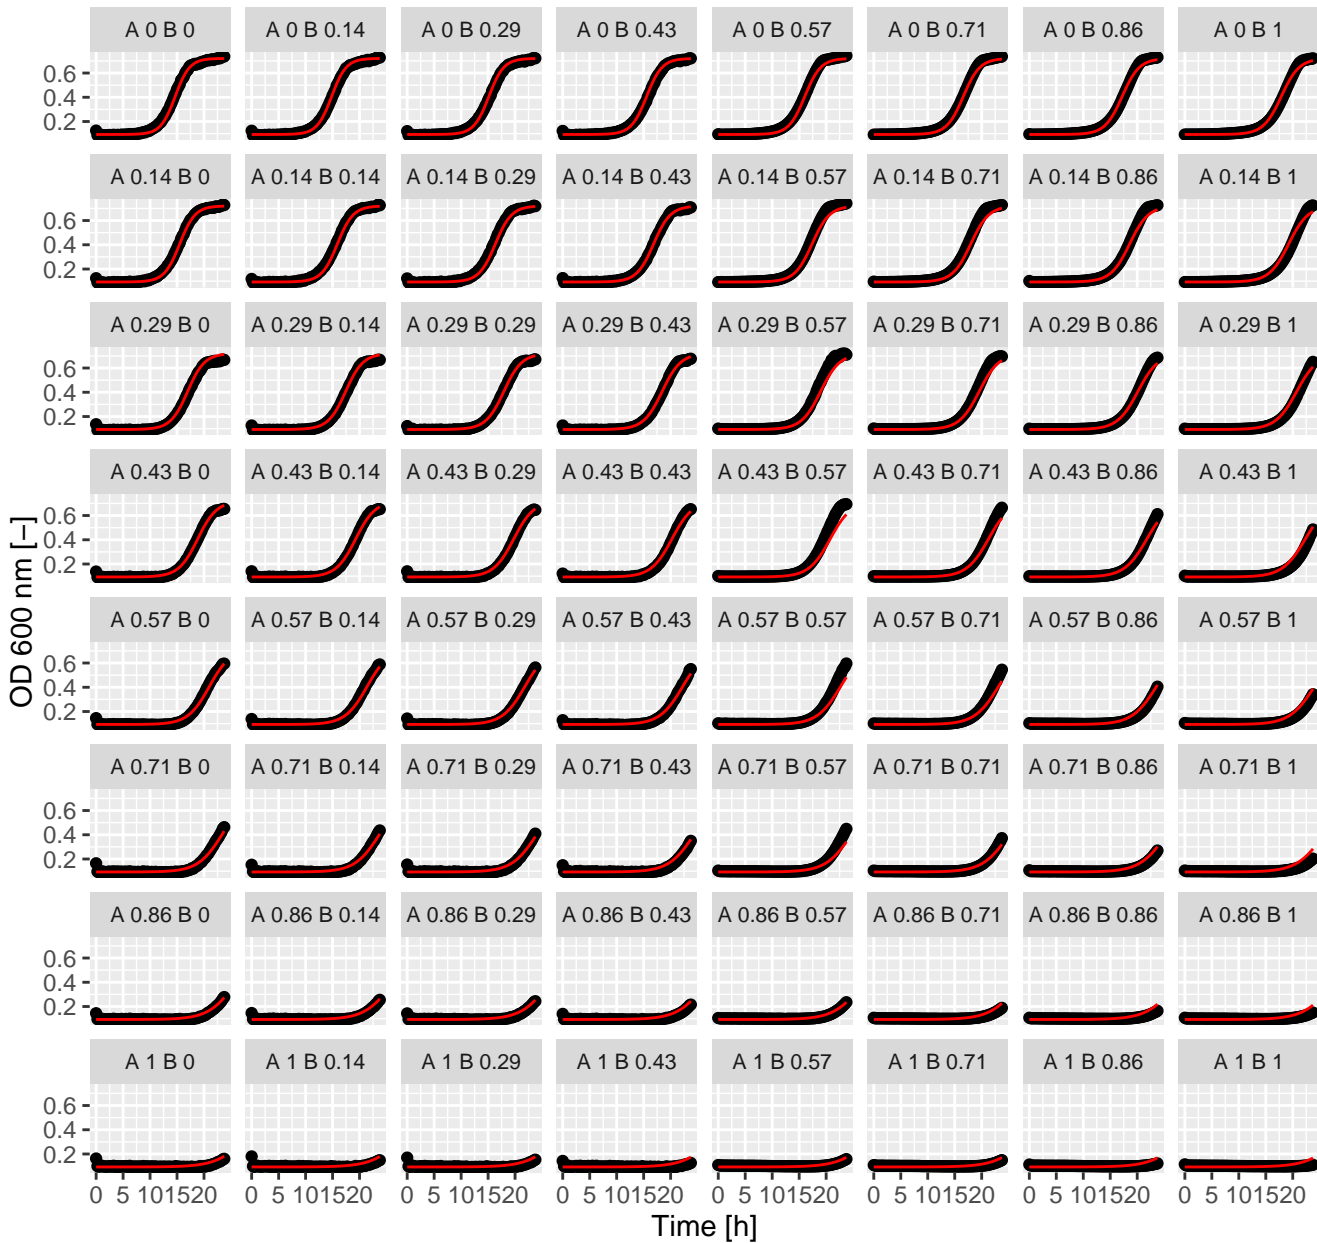

Ben.Chl (= Ax.Bx) Greco  
alpha = 0.94

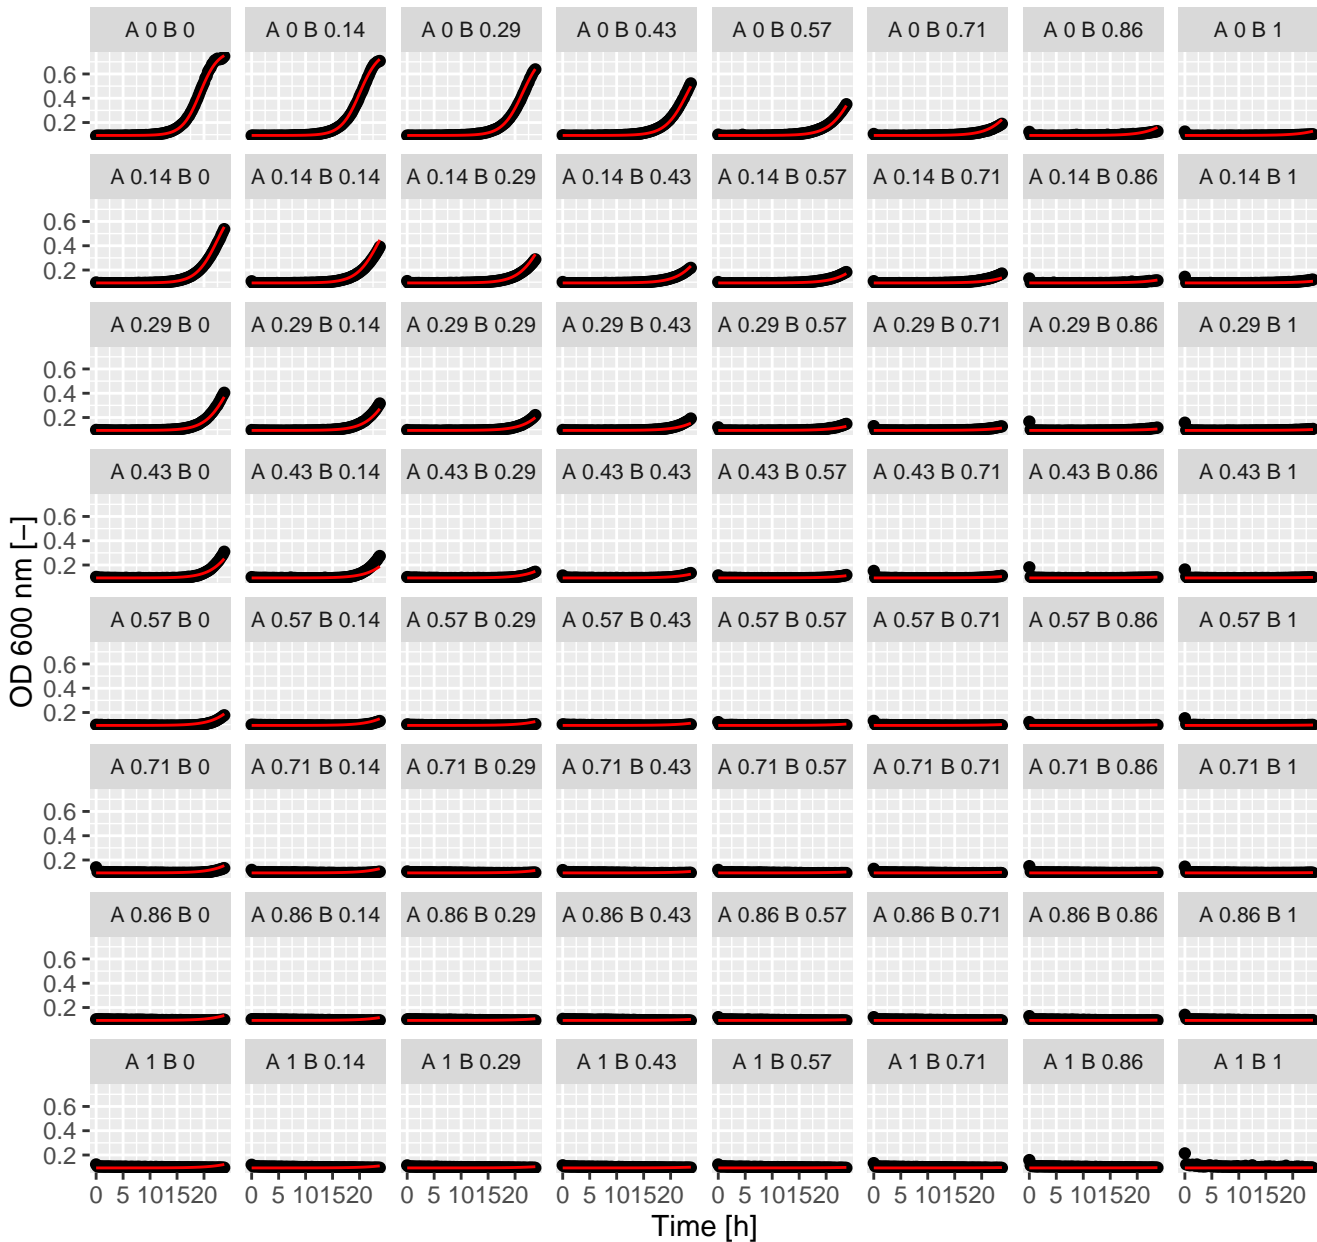

Ben.Cal (= Ax.Bx) Greco  
 $\alpha = -0.83$

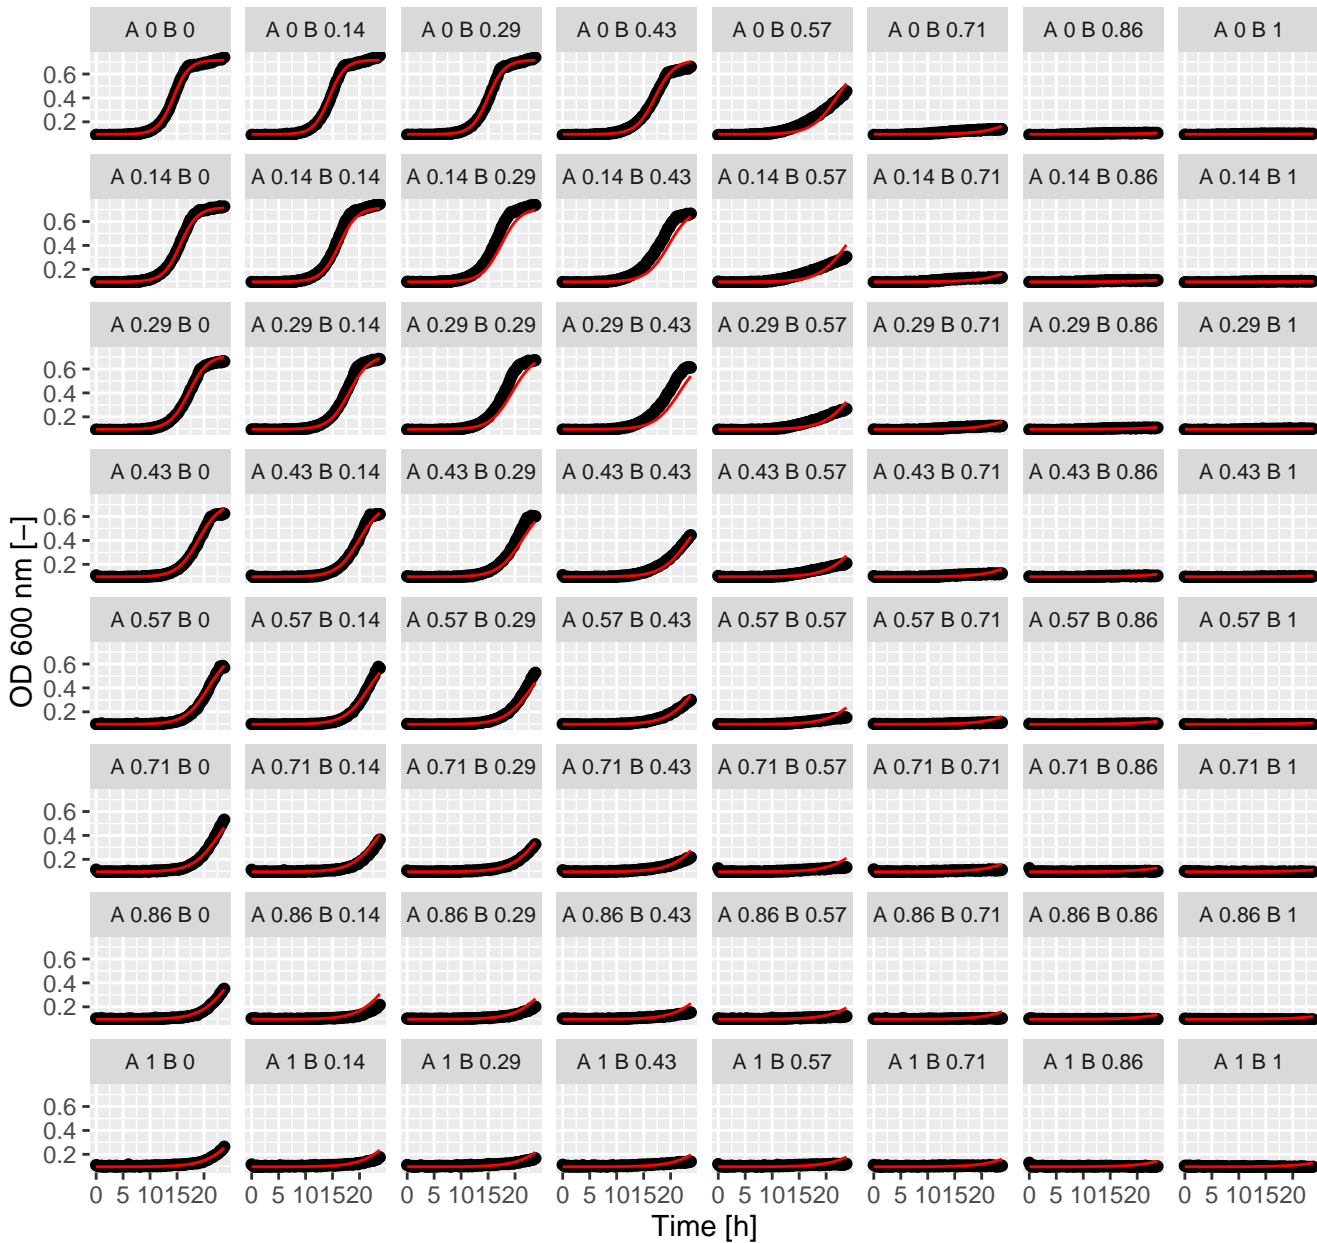



Ben.C3P (= Ax.Bx) Greco  
 $\alpha = 1.42$

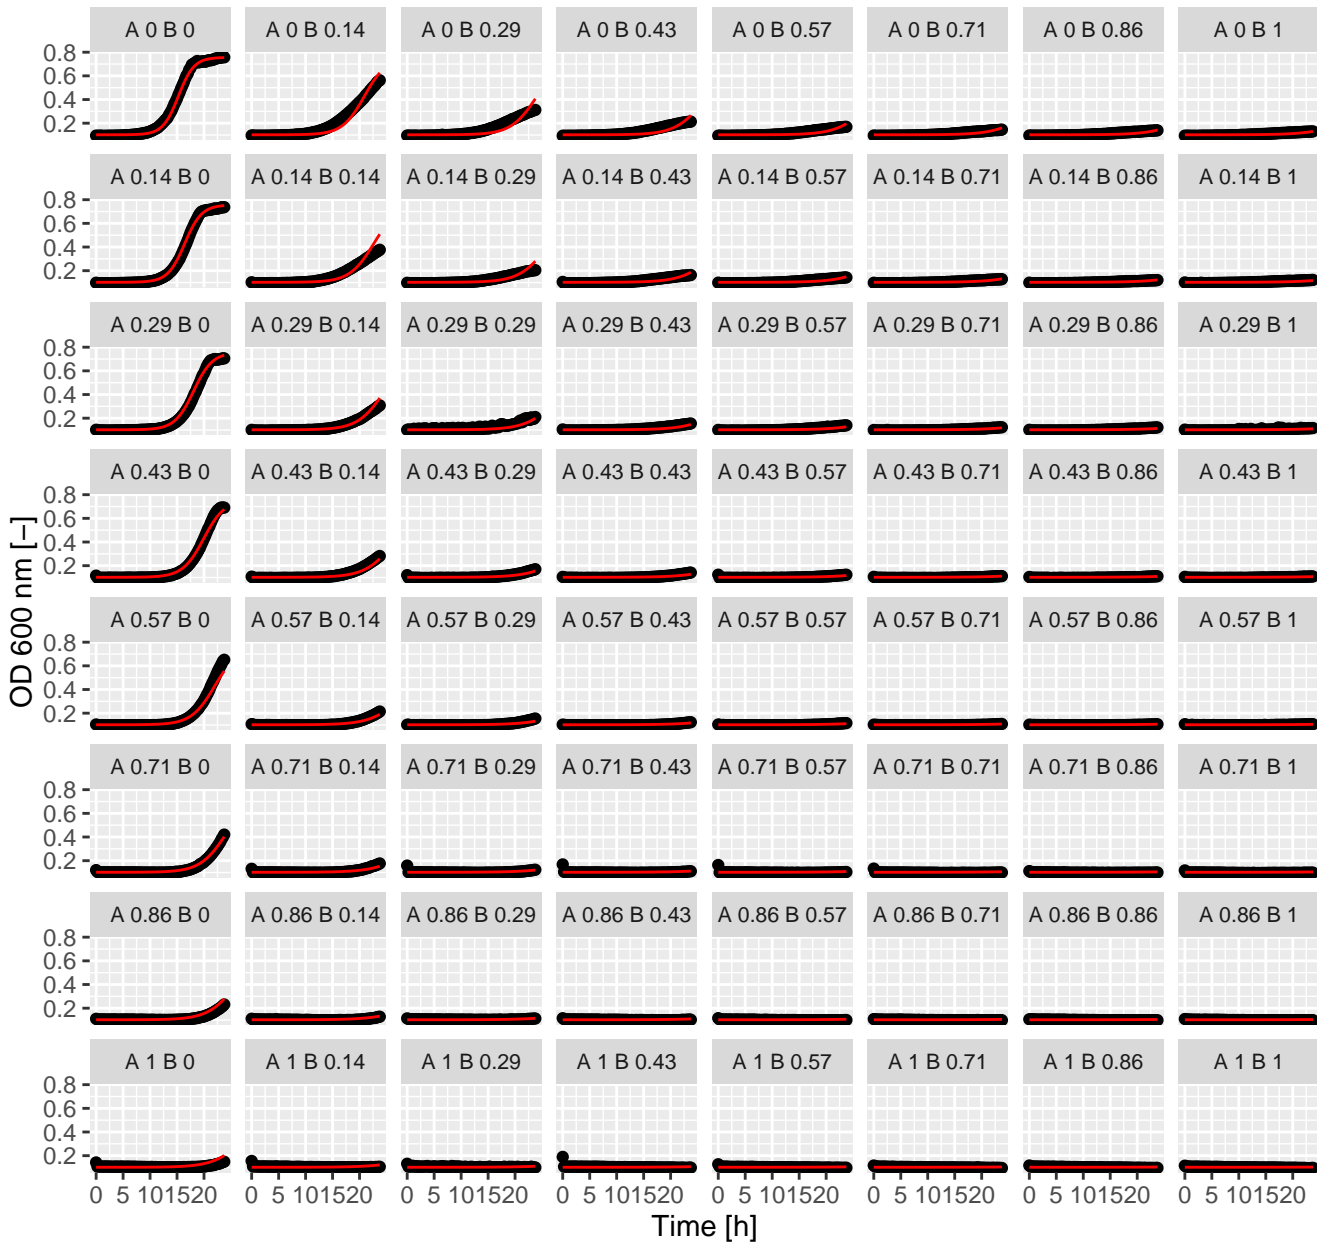

Ben.Bro (= Ax.Bx) Greco  
 $\alpha = -0.85$

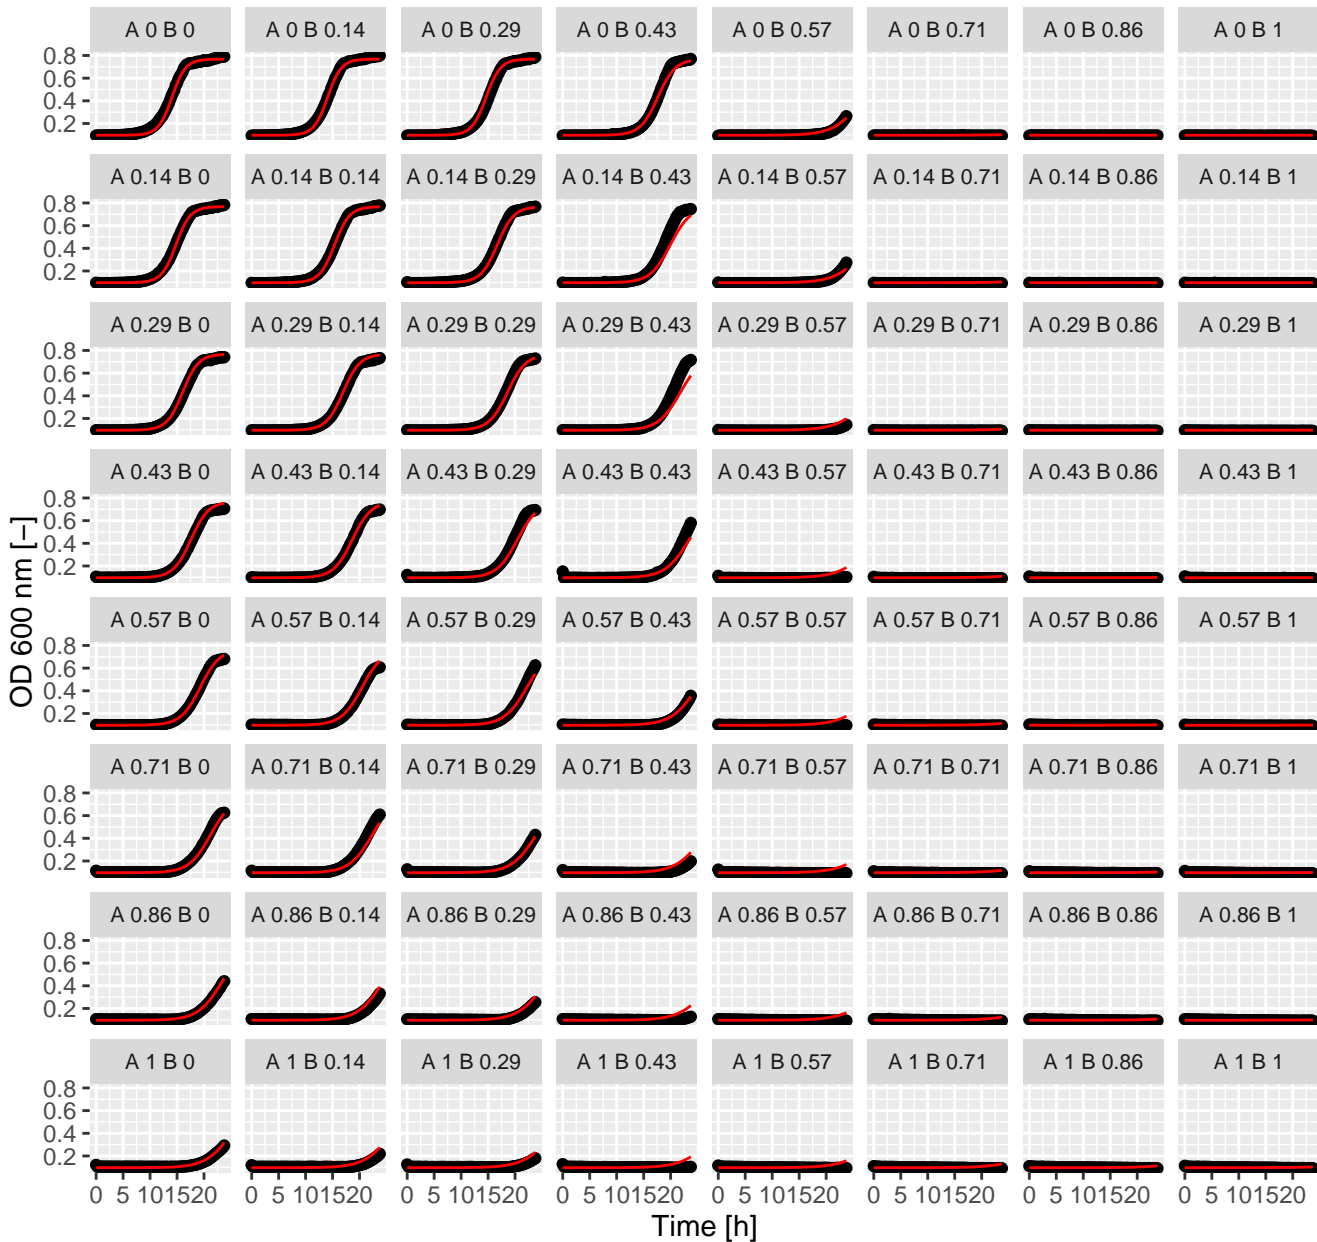

Ben.Ben (= Ax.Bx) Greco  
 $\alpha = -0.25$

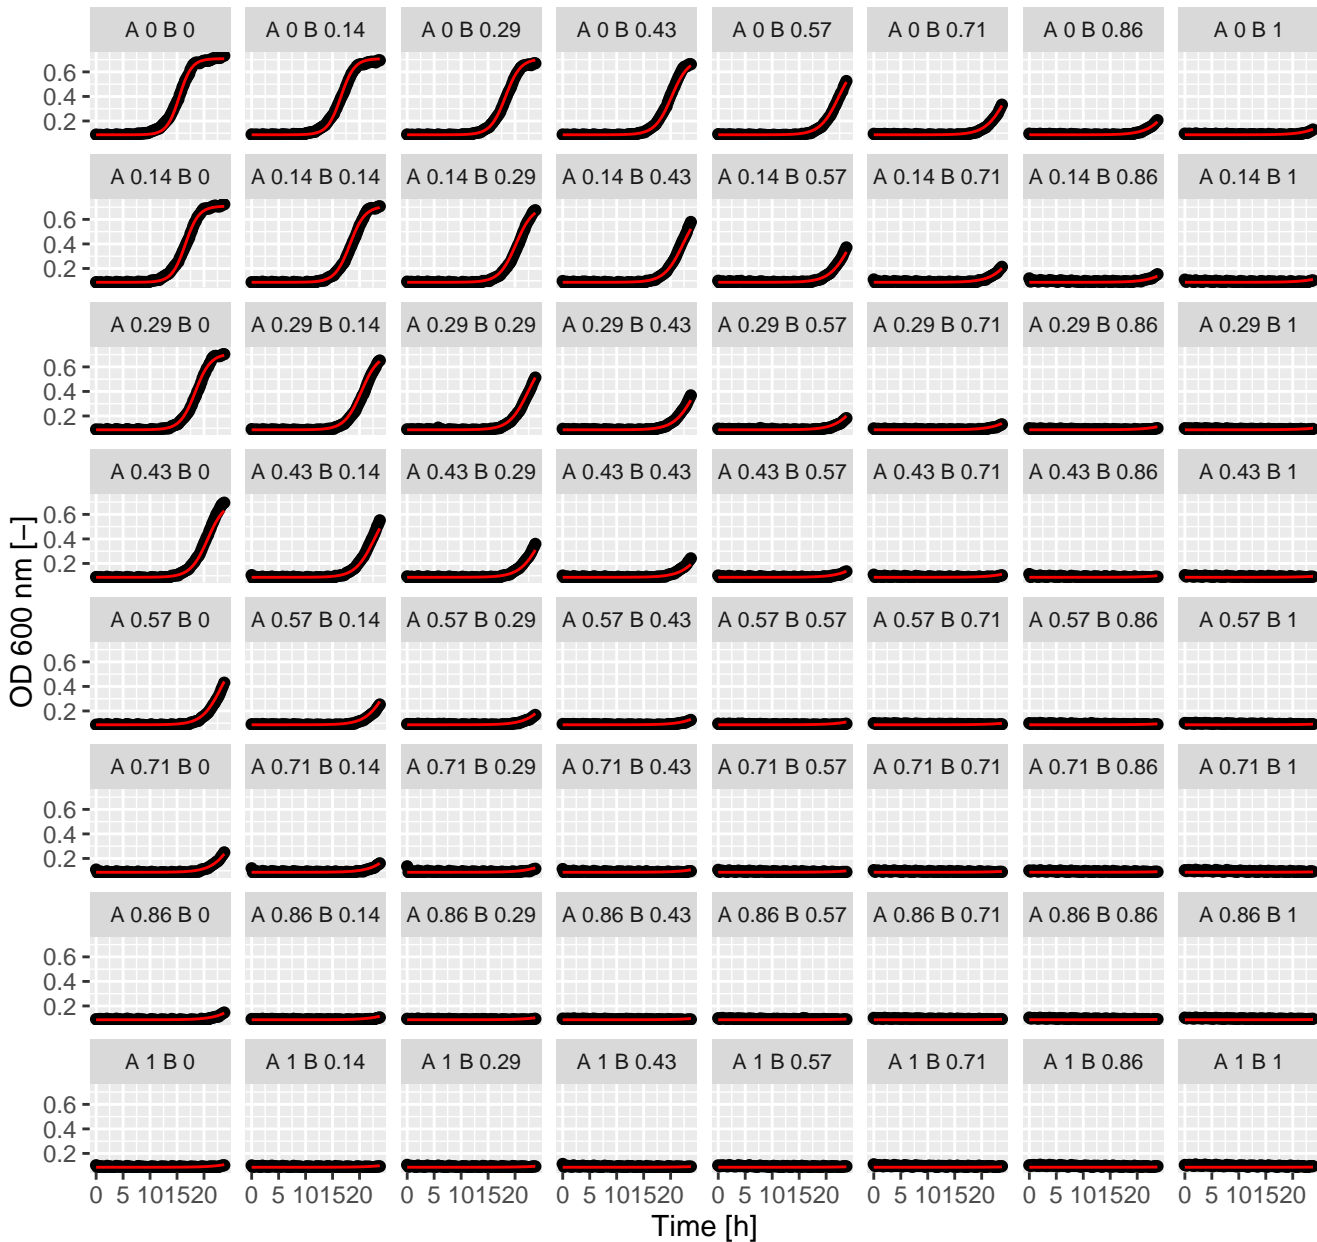

Ani.Ter (= Ax.Bx) Greco  
alpha = -0.11

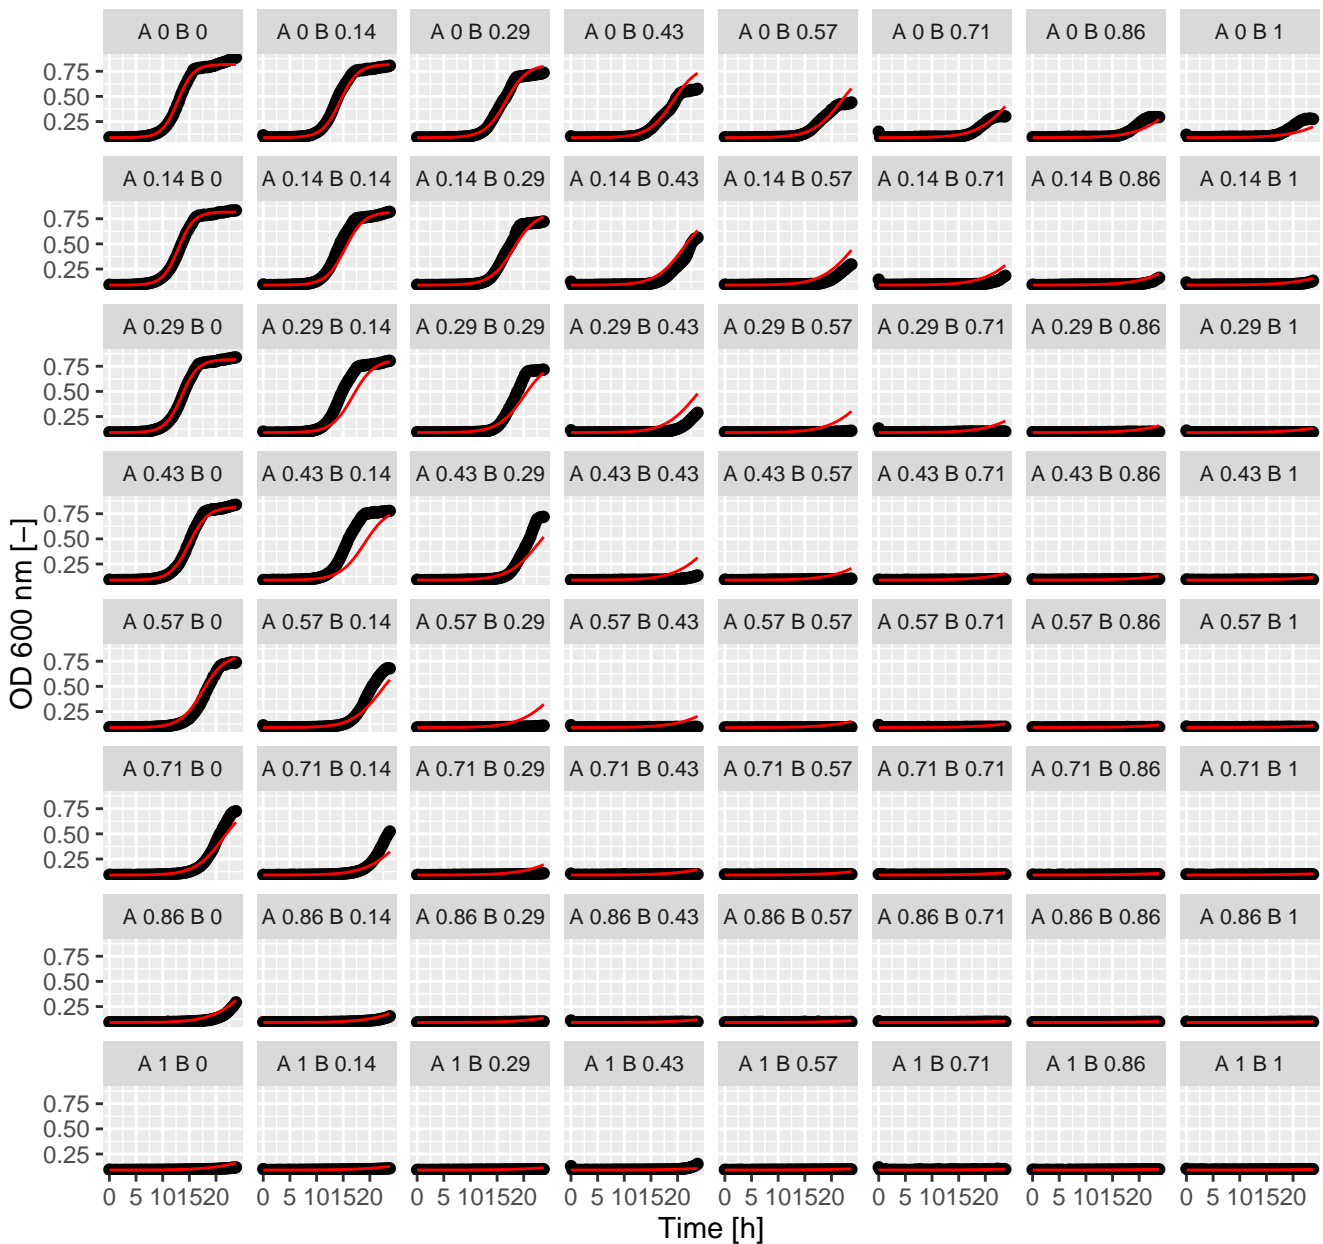

Ani.Tac (= Ax.Bx) Greco  
alpha = 26.11

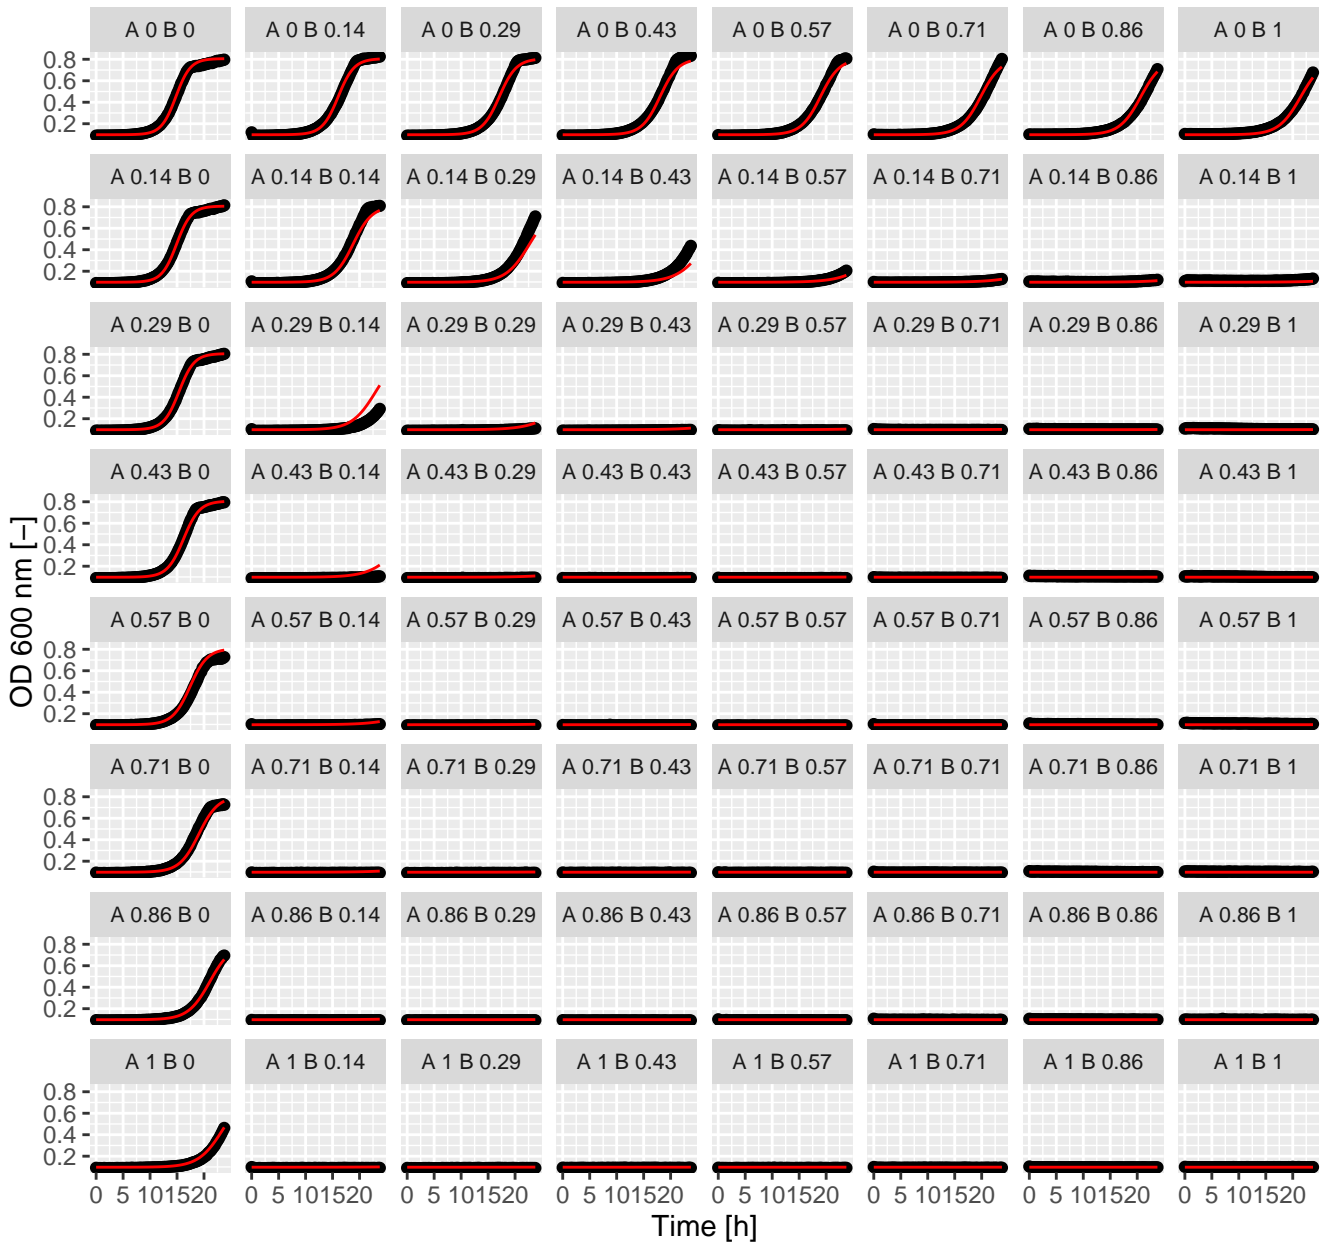

Ani.Sta (= Ax.Bx) Greco  
 $\alpha = -0.98$

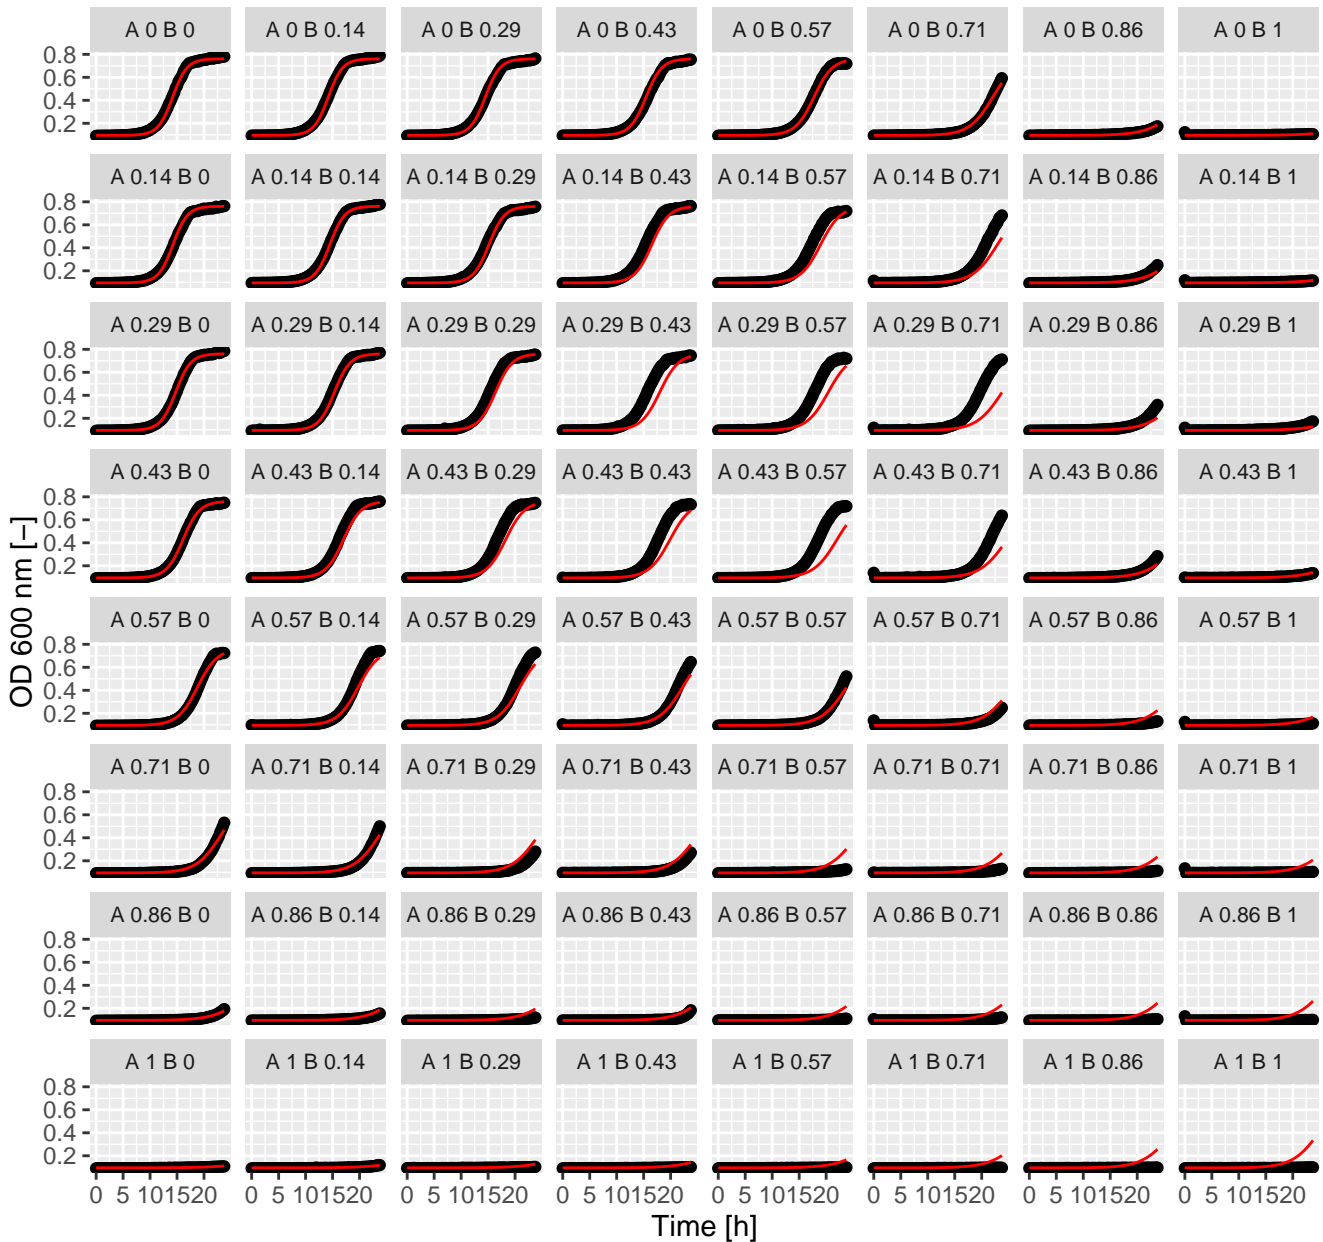

Ani.Pen (= Ax.Bx) Greco  
 $\alpha = -0.58$

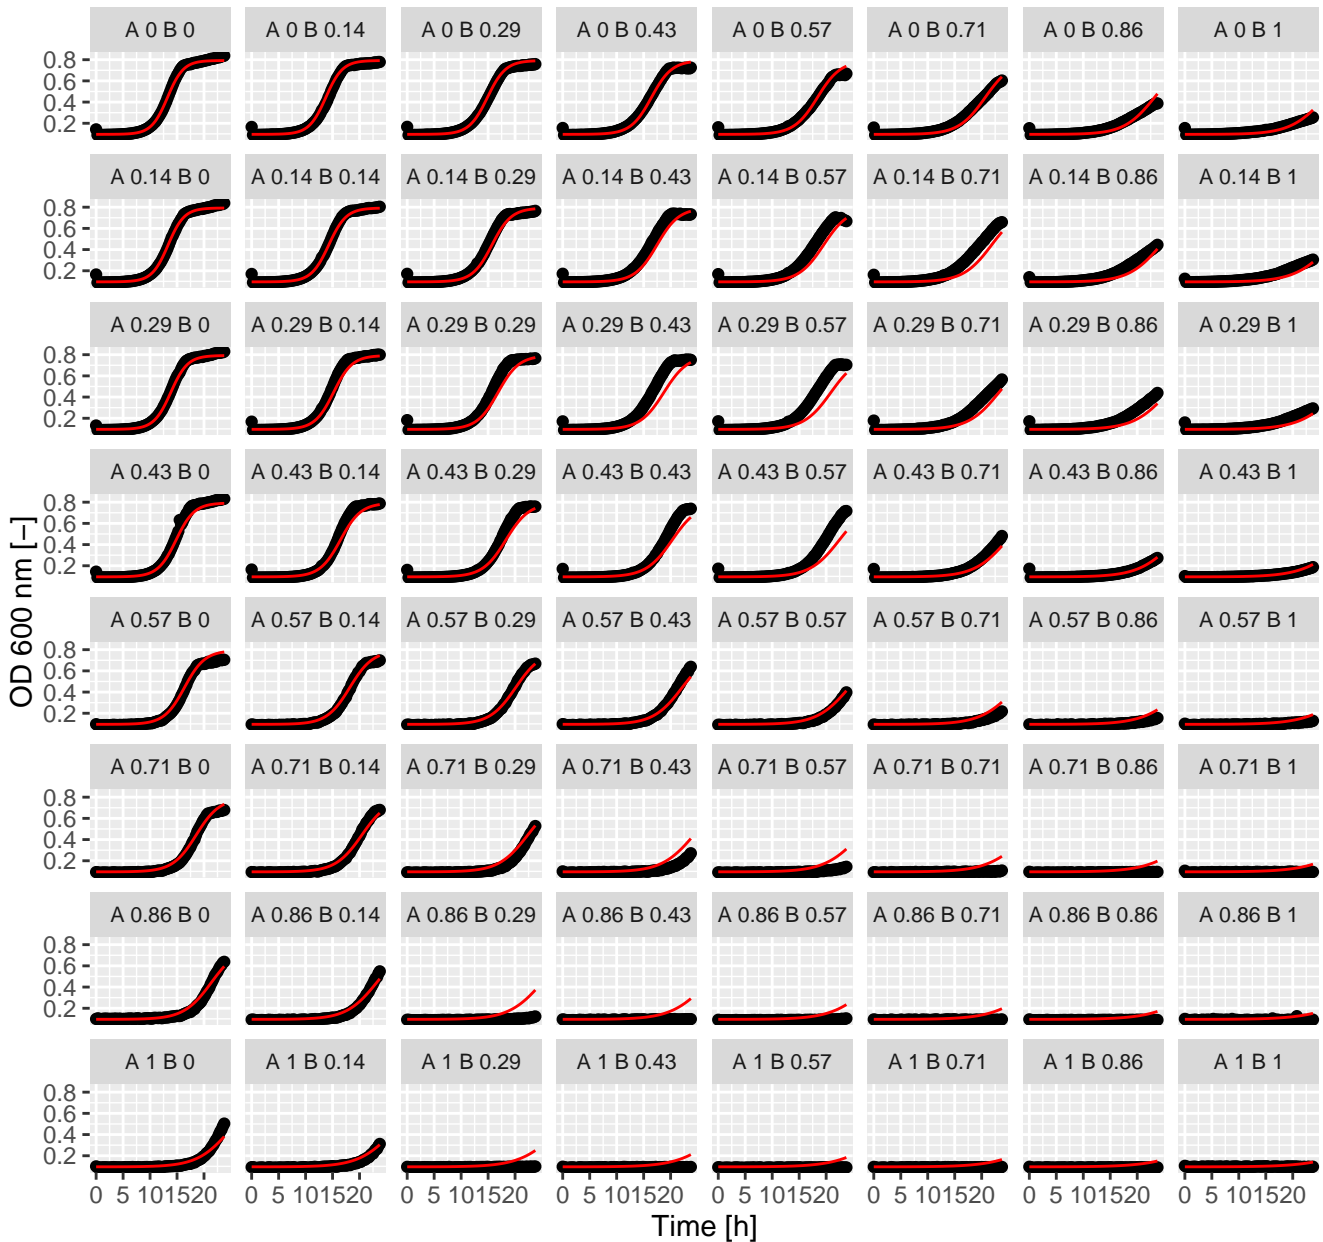

Ani.Lat (= Ax.Bx) Greco  
 $\alpha = -1.01$

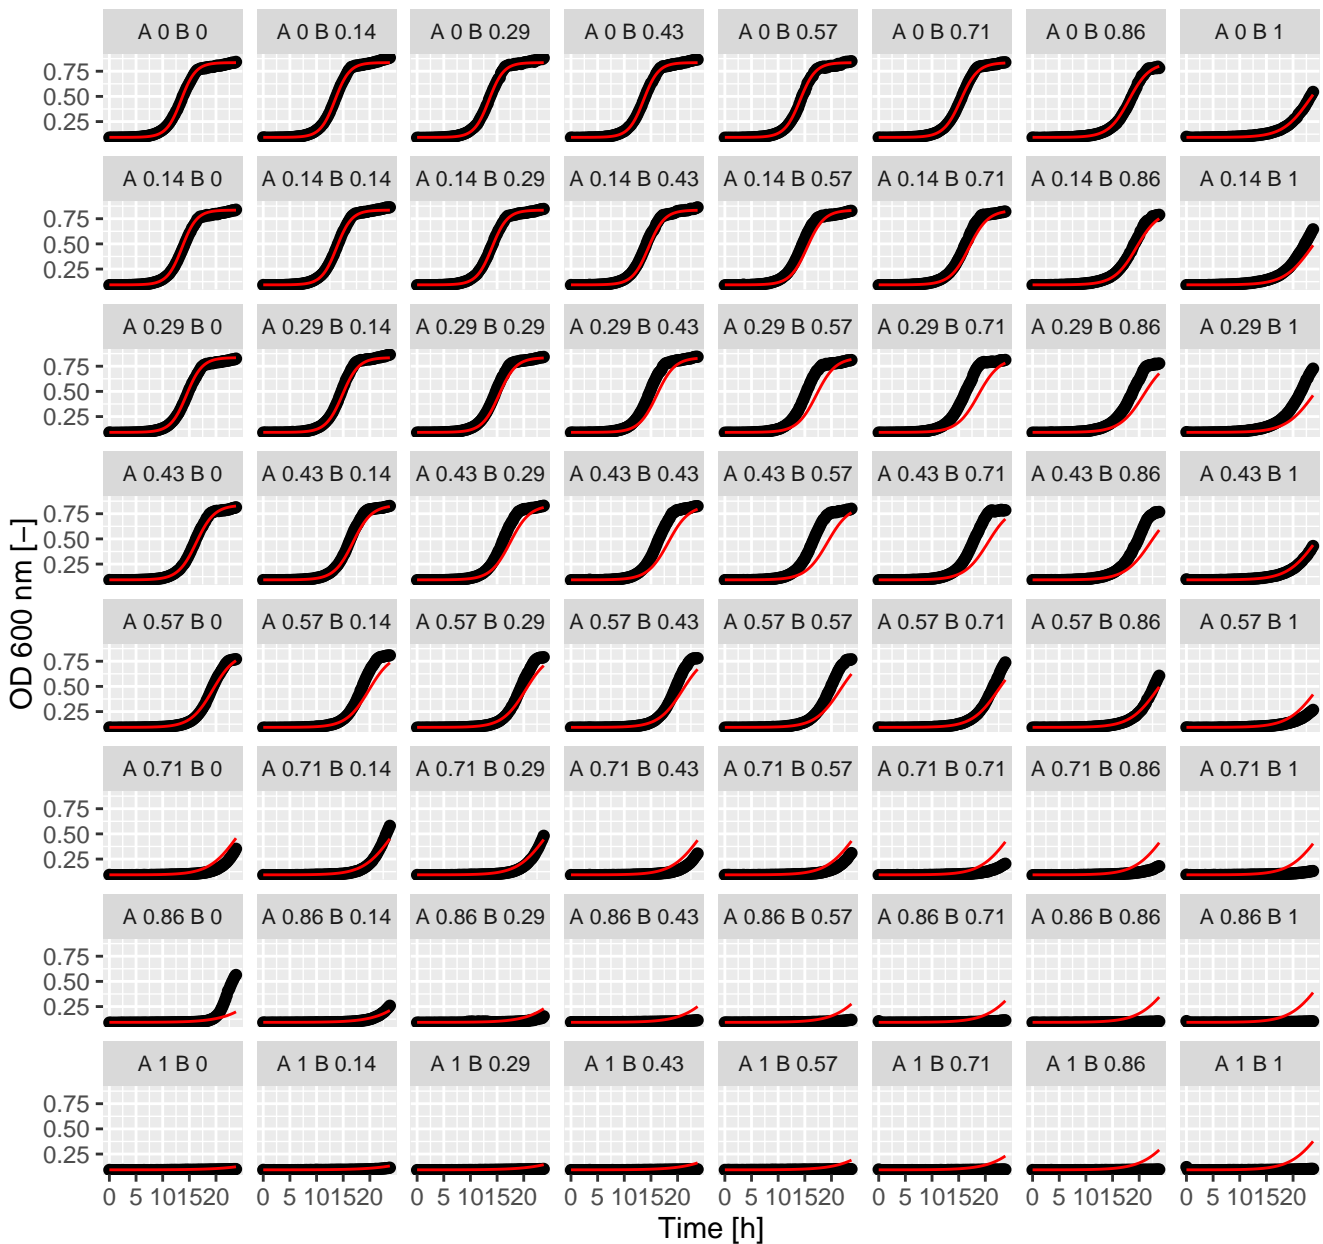



Ani.Ben (= Ax.Bx) Greco  
 $\alpha = -0.89$

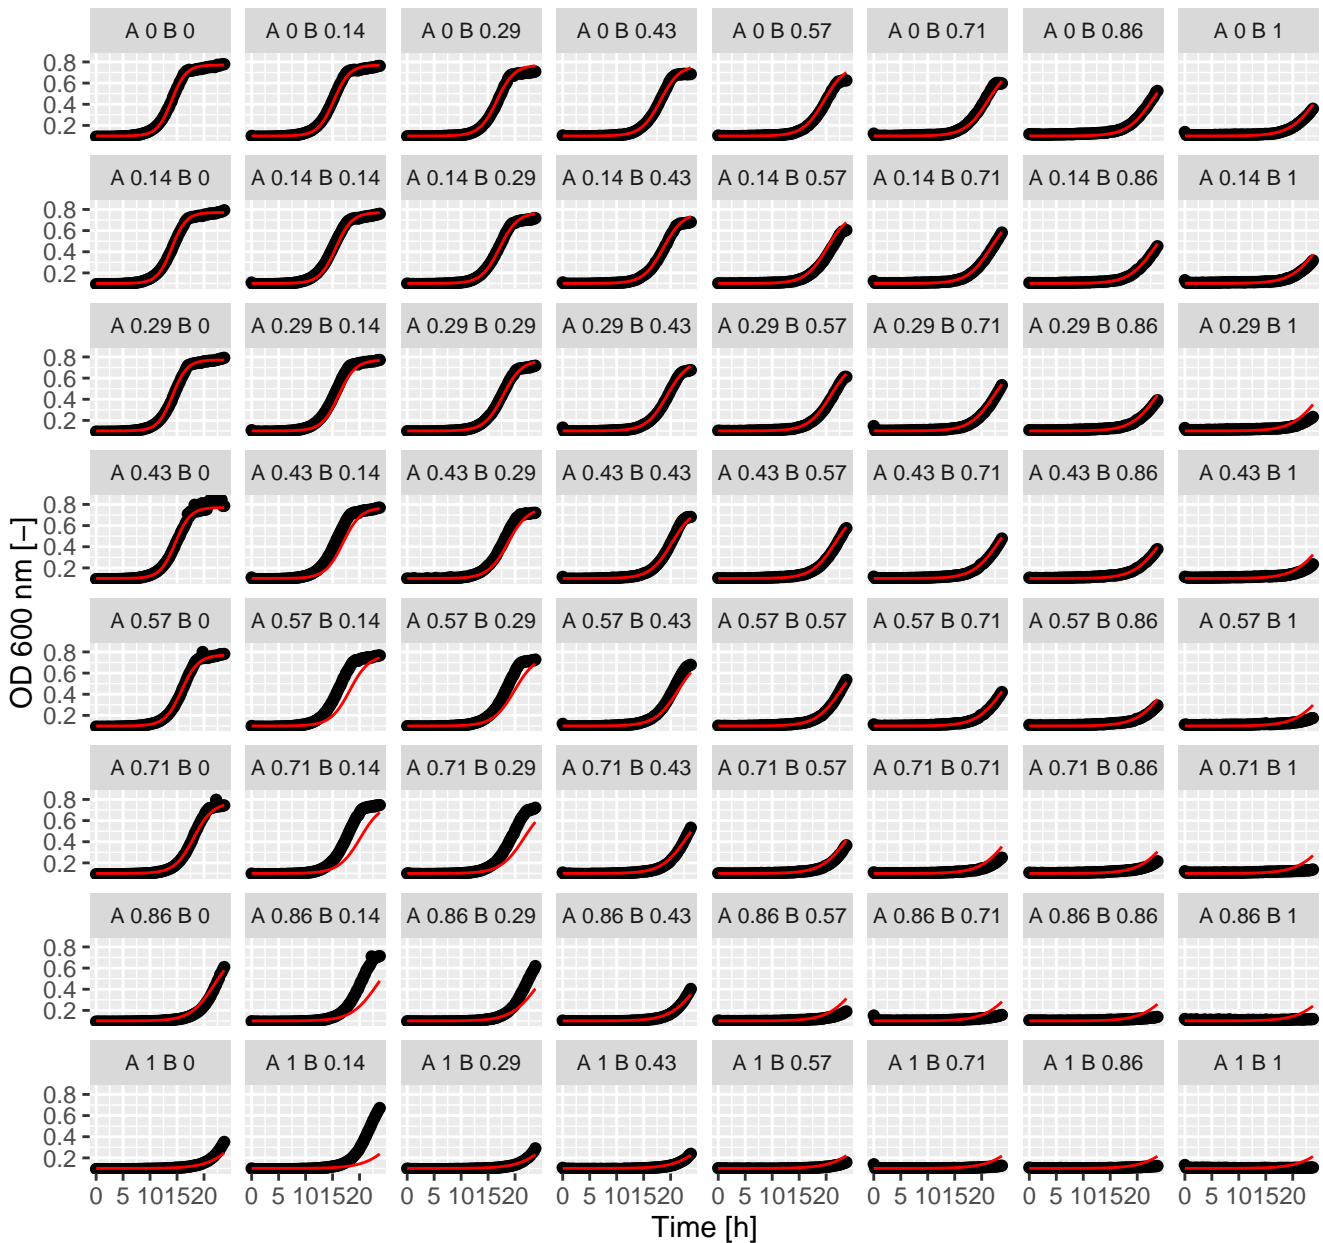

Ani Ani (= Ax.Bx) Greco  
alpha = 0.27

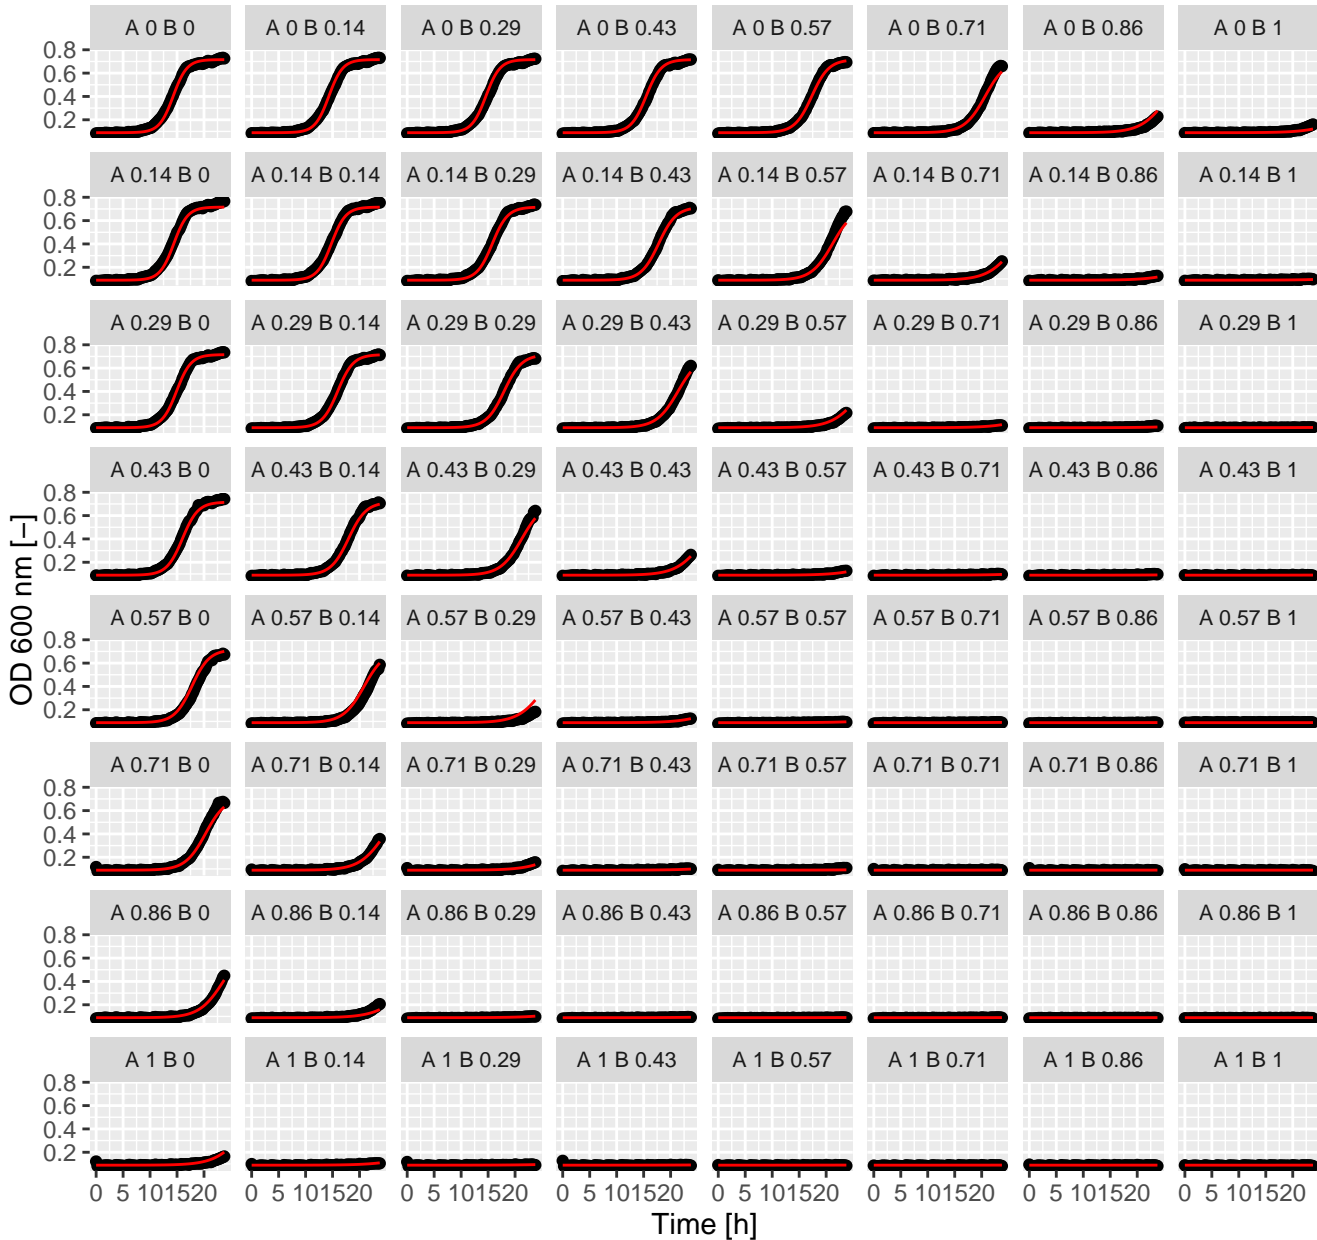

AmB.Ter (= Ax.Bx) Greco  
 $\alpha = -1.31$

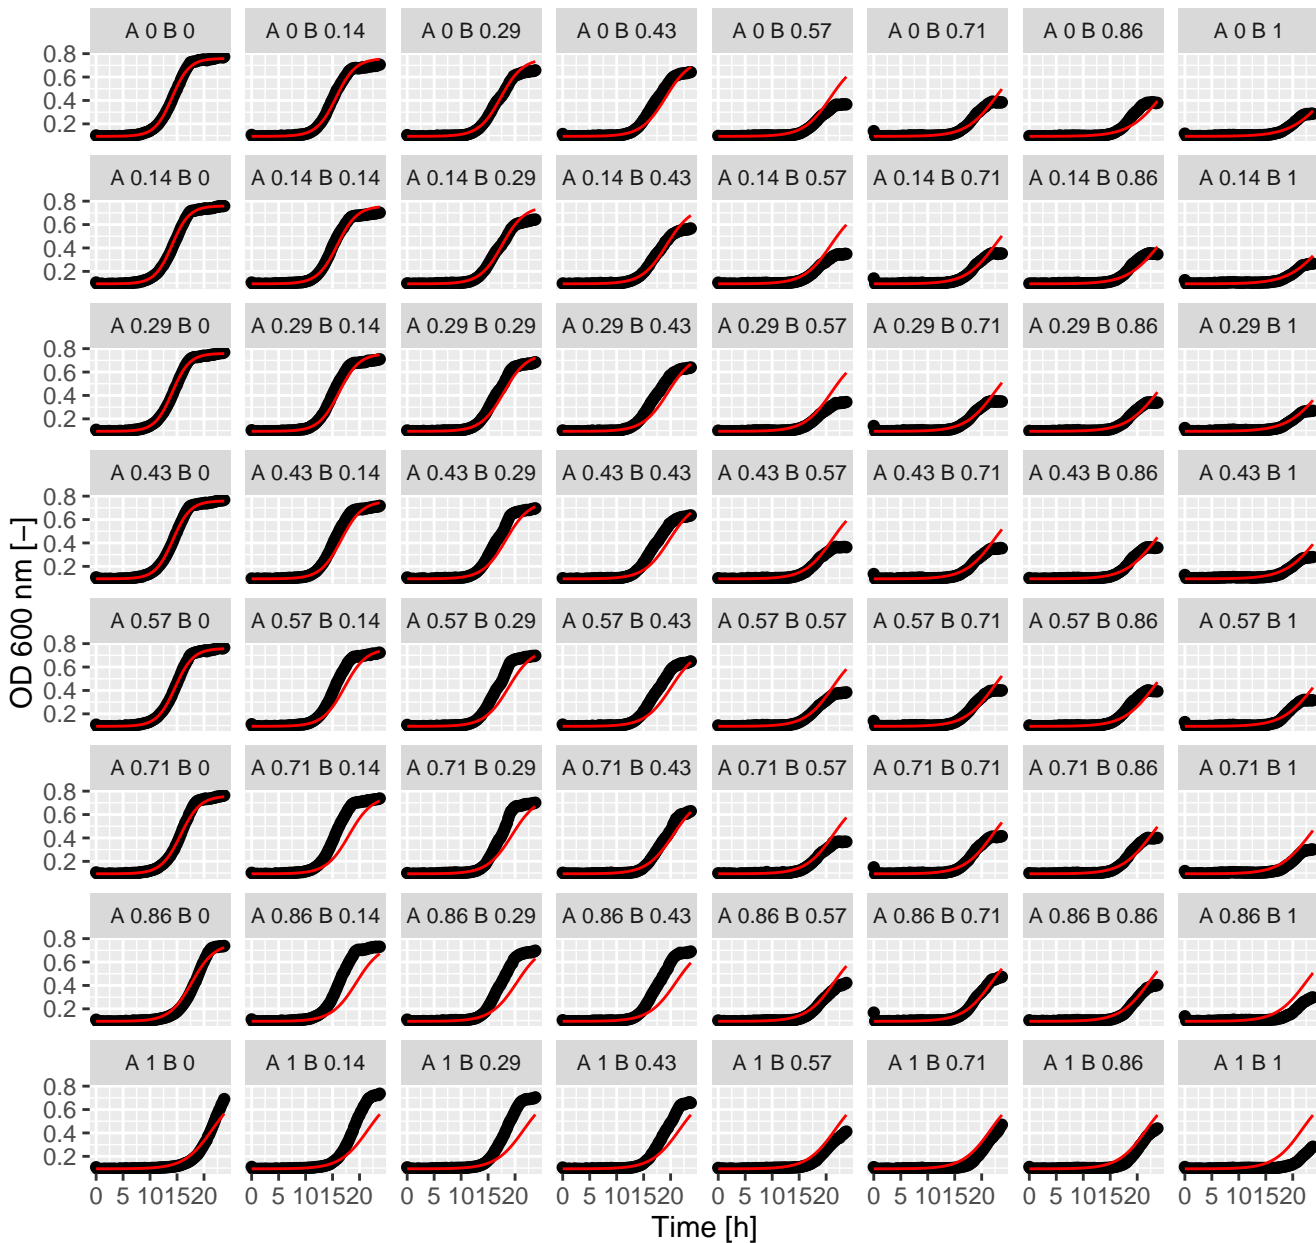

AmB.Tac (= Ax.Bx) Greco  
 $\alpha = -1.45$

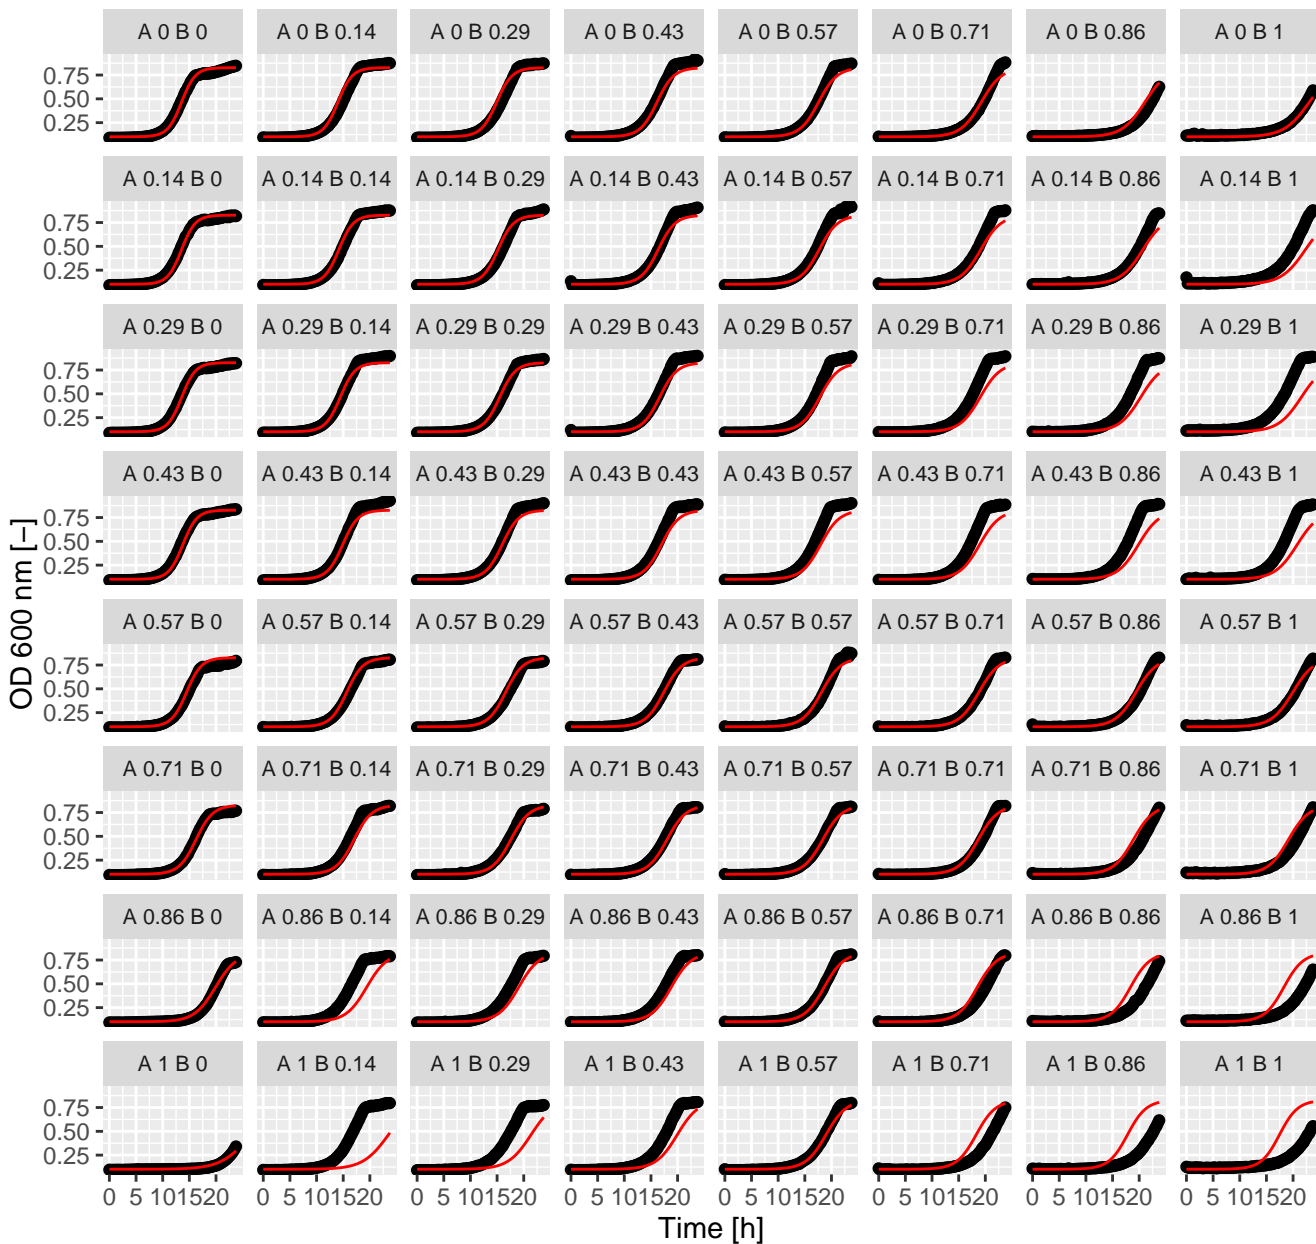

AmB.Sta (= Ax.Bx) Greco  
 $\alpha = -1.11$

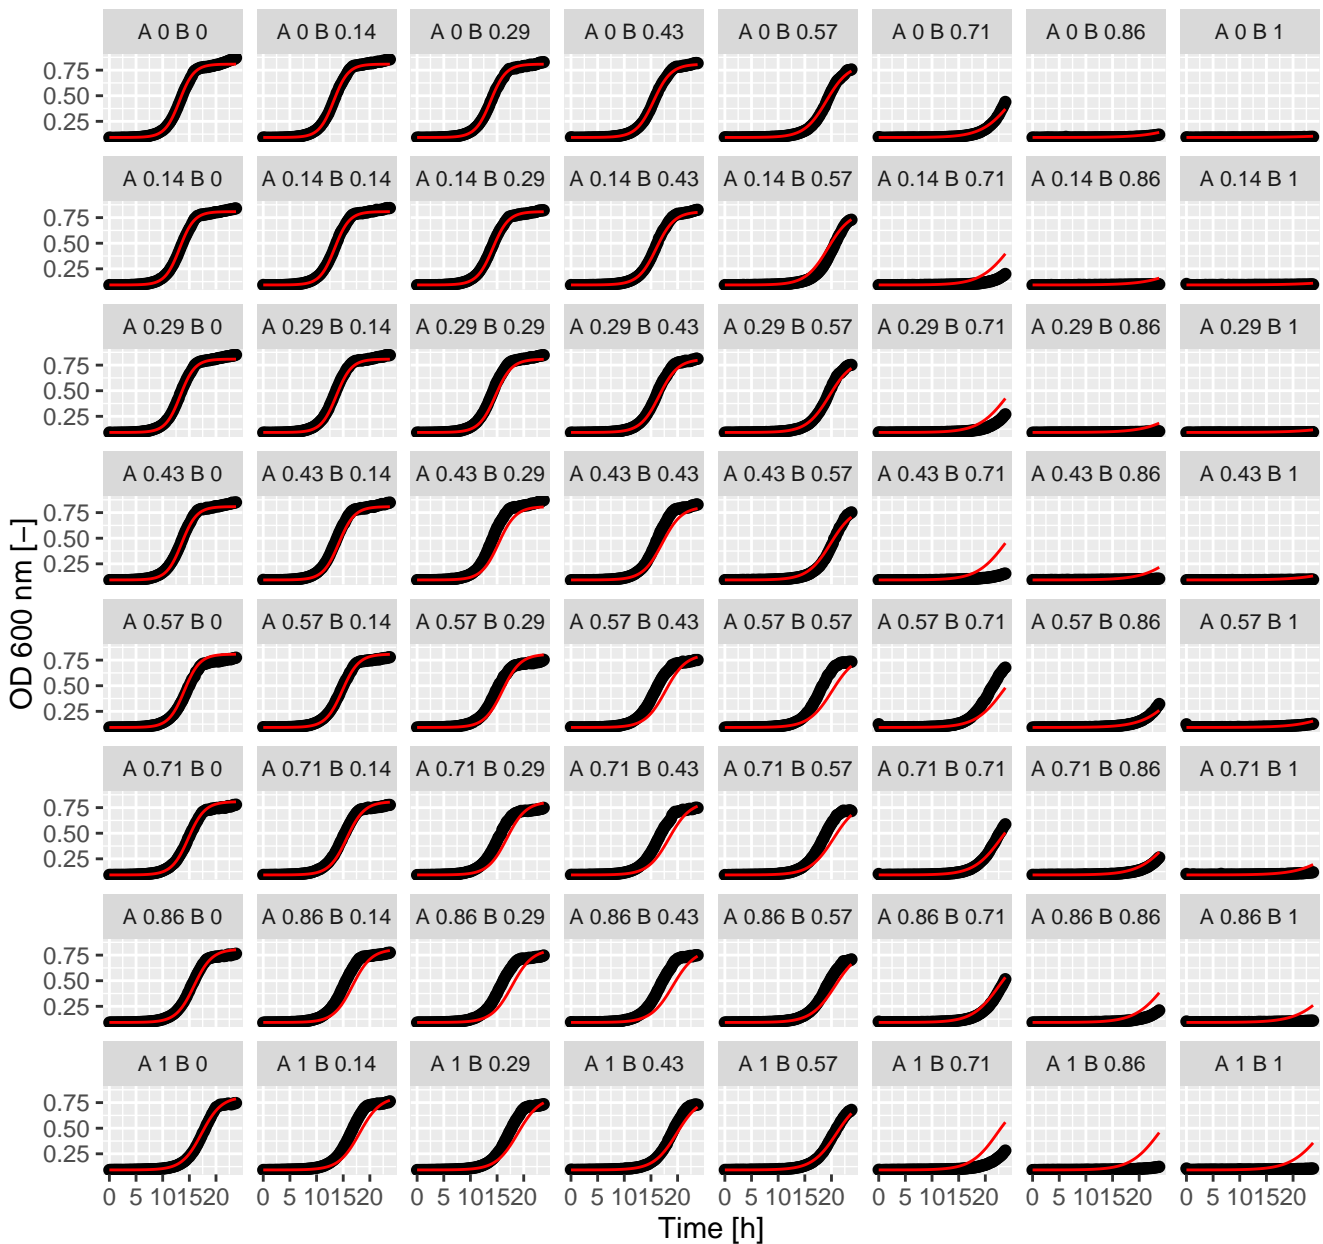

AmB.Pen (= Ax.Bx) Greco  
 $\alpha = -0.79$

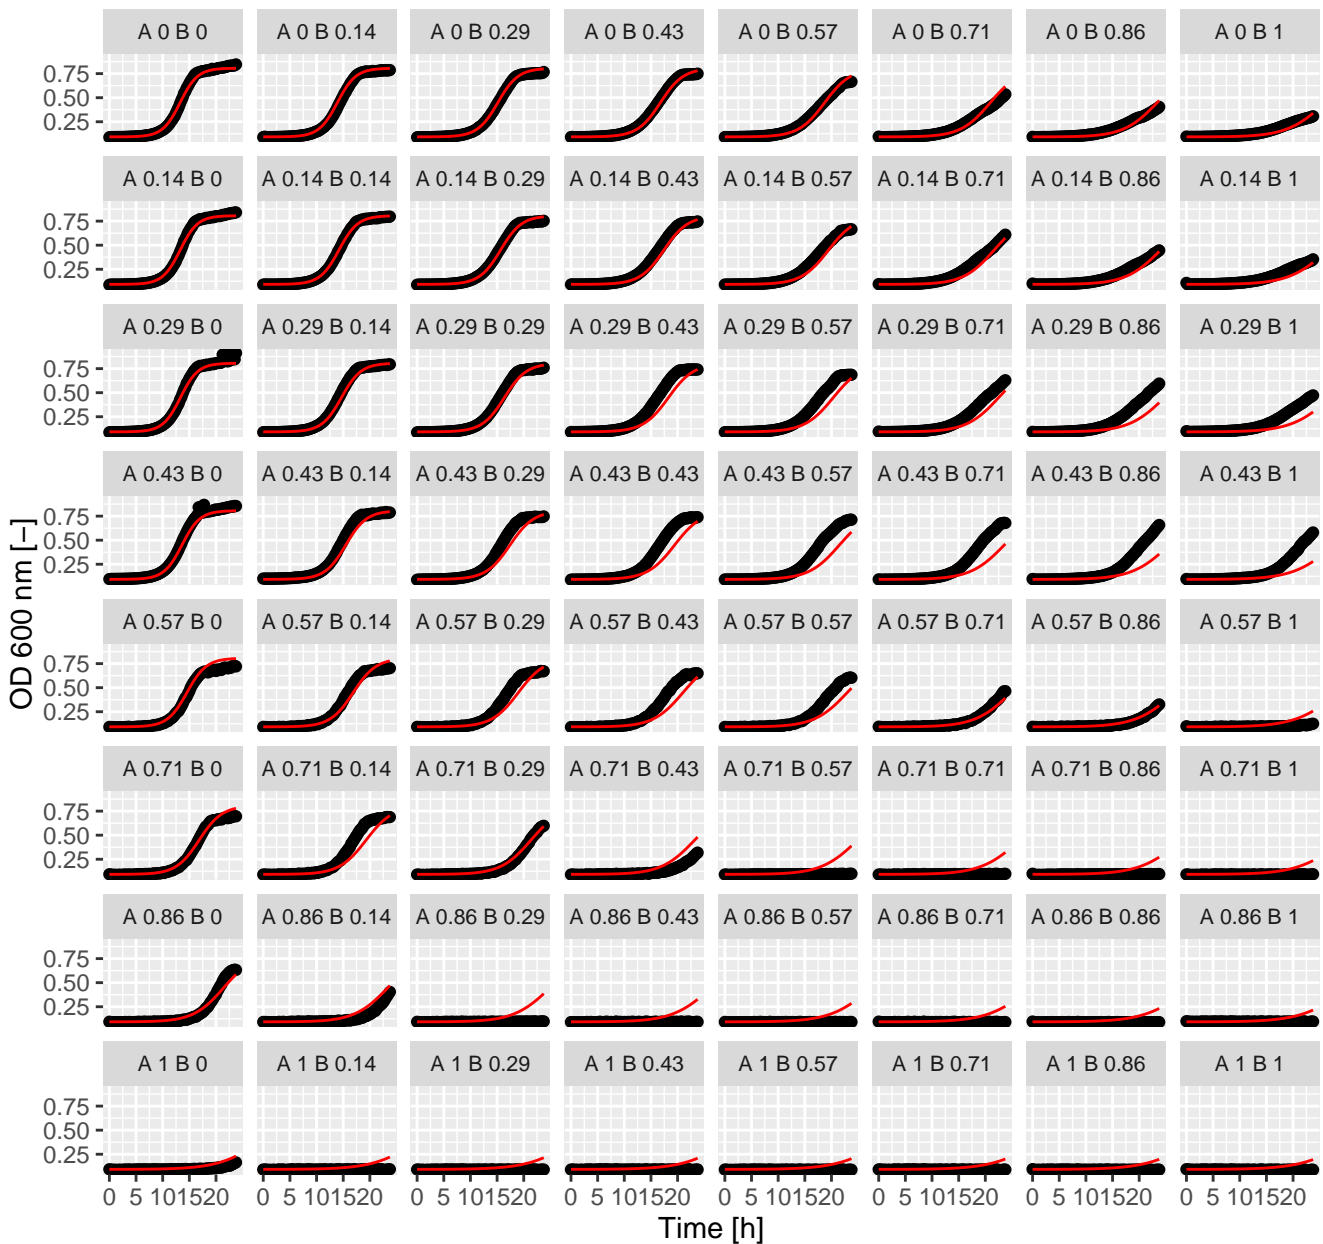

AmB.Ben (= Ax.Bx) Greco  
 $\alpha = -1.2$

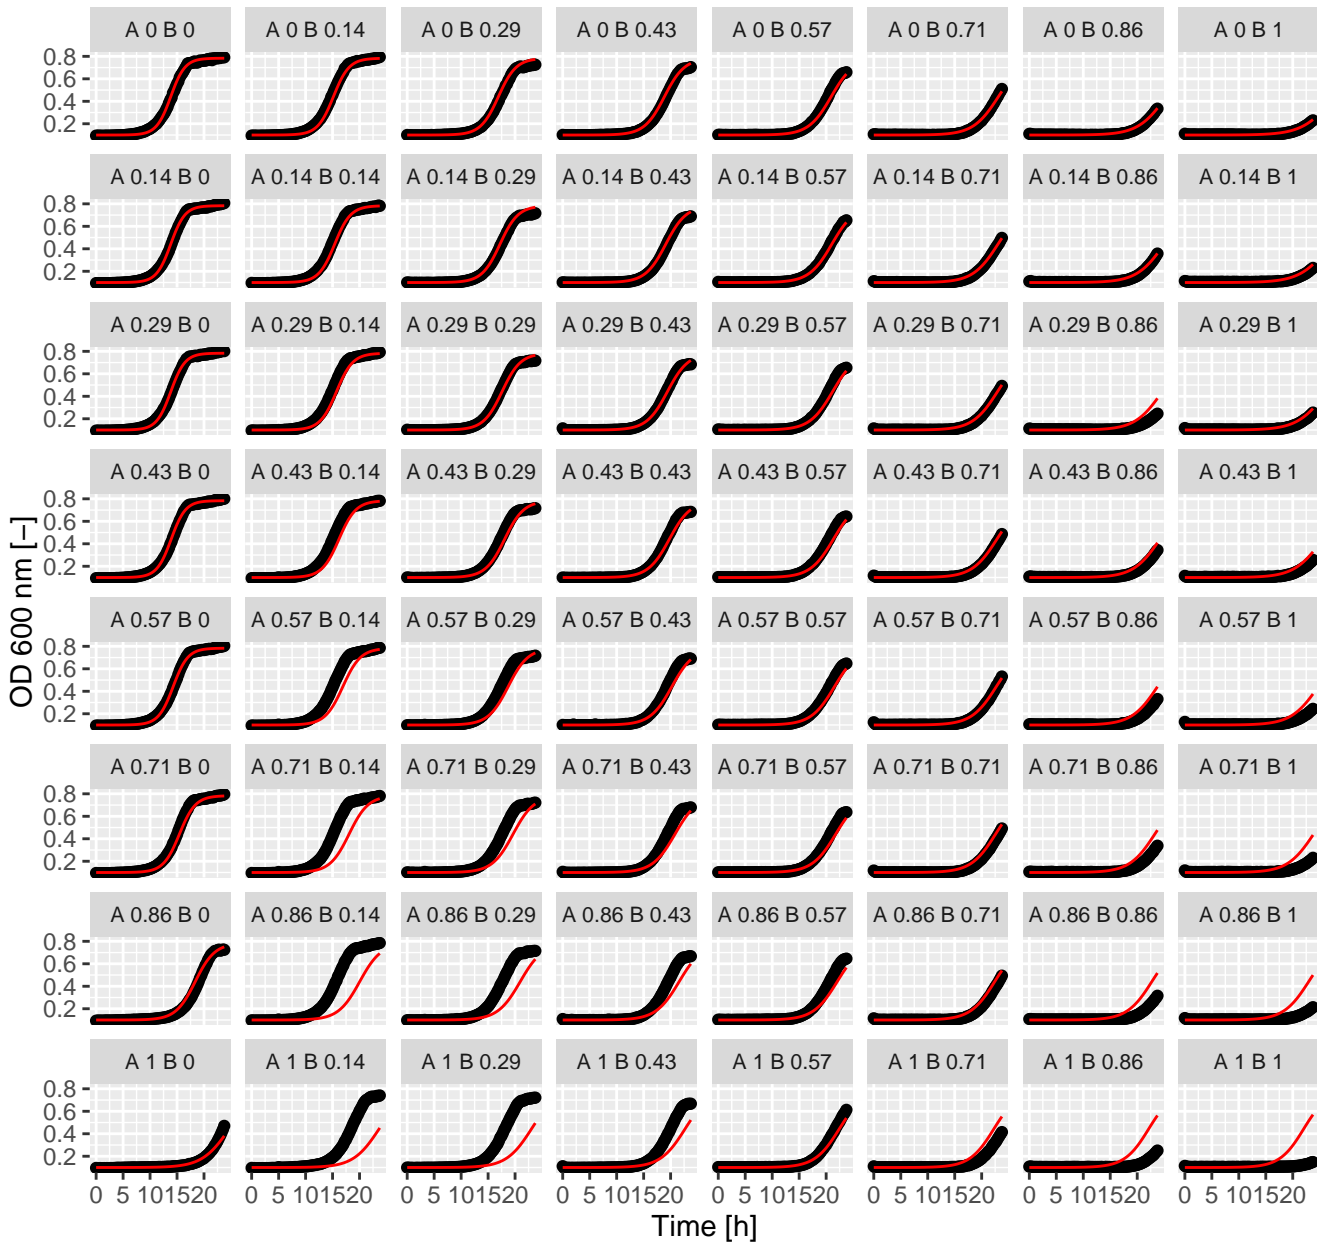

AmB.AmB (= Ax.Bx) Greco  
 $\alpha = -0.53$

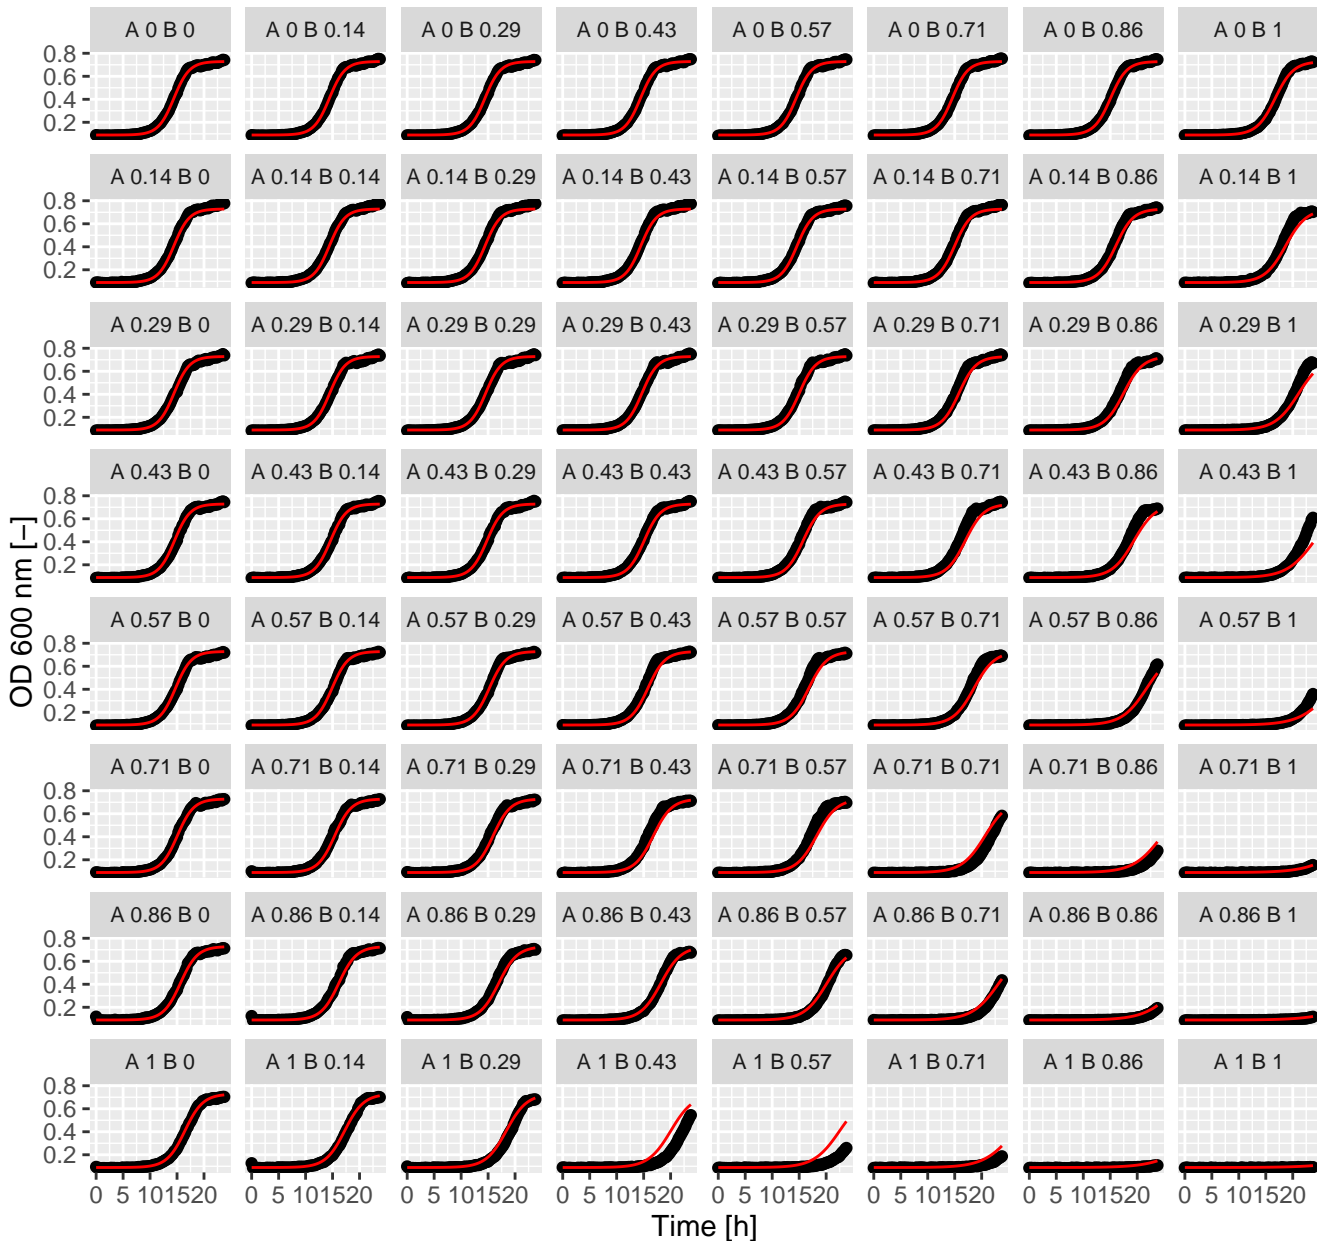



AbA.Wor (= Ax.Bx) Greco  
 $\alpha = -0.53$

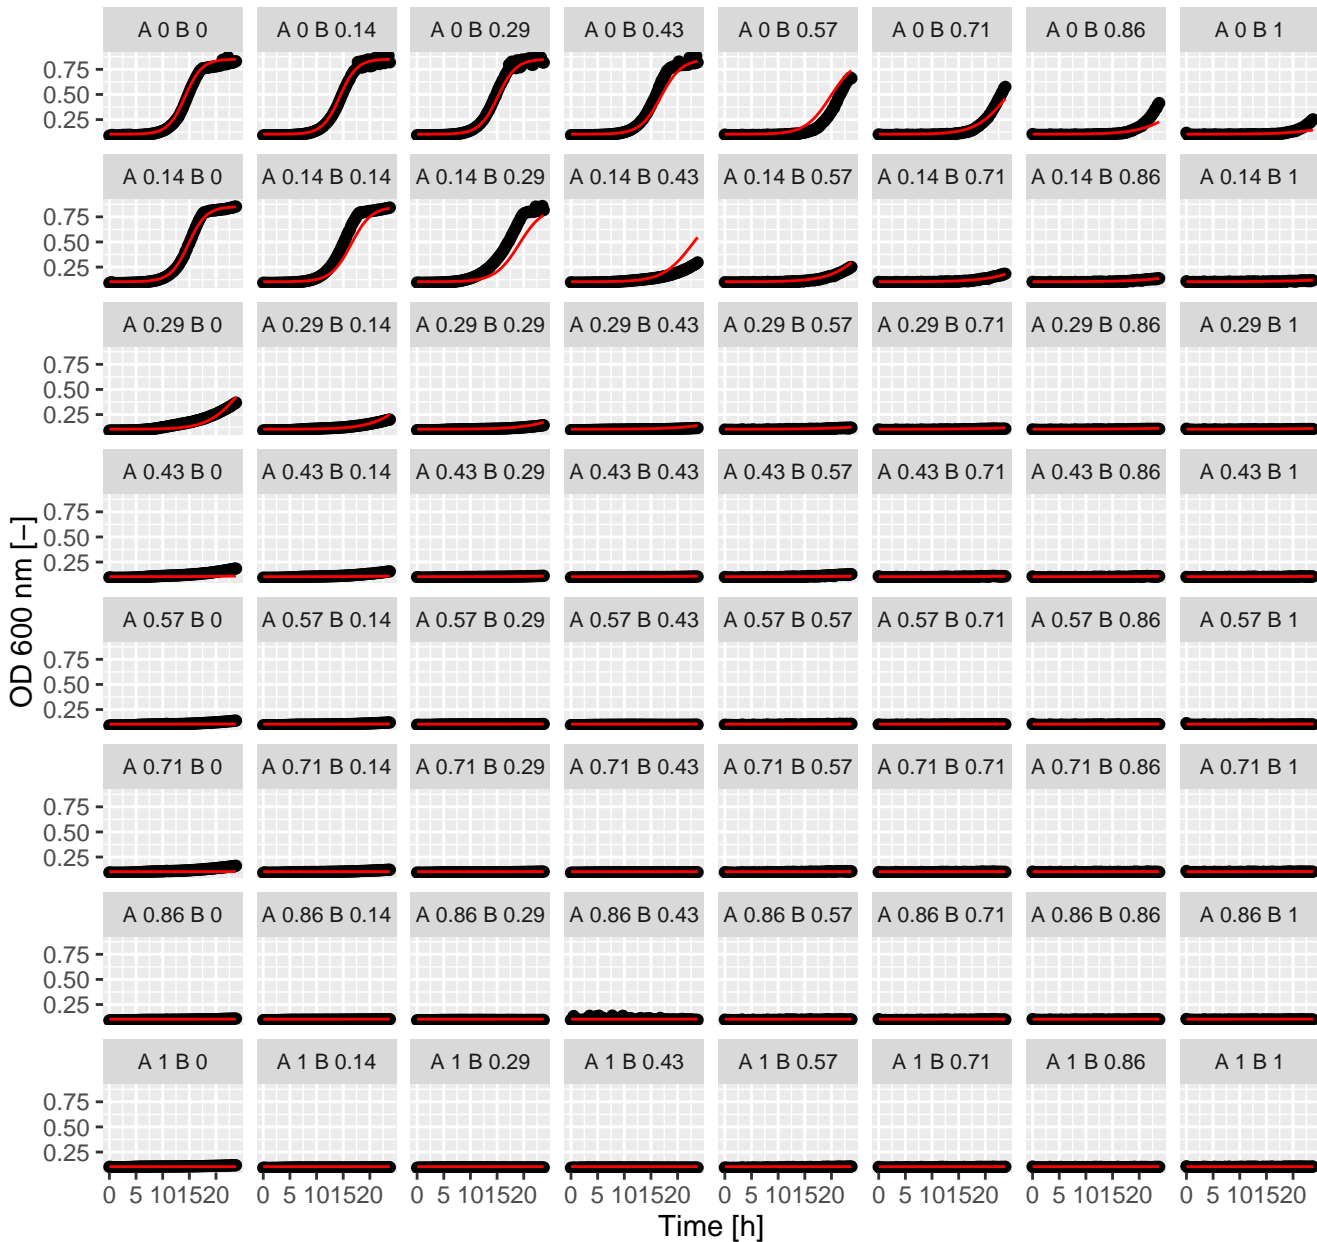

AbA.Lit (= Ax.Bx) Greco  
 $\alpha = -0.98$

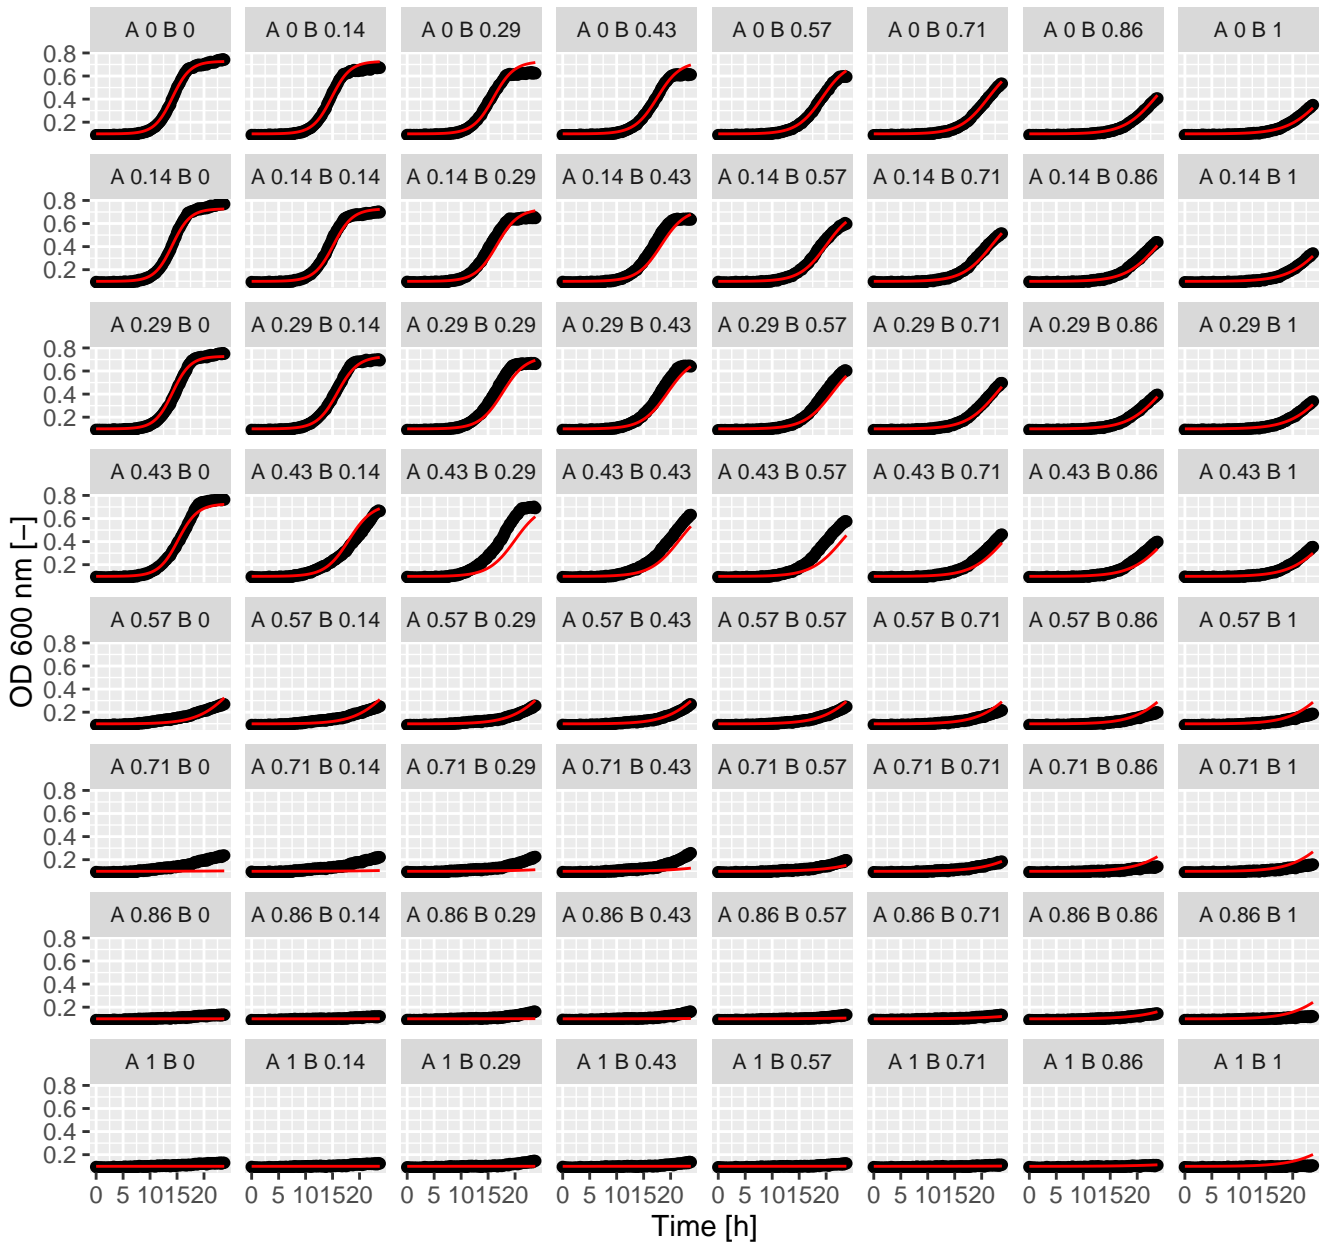

5FU.Ter (= Ax.Bx) Greco  
alpha = 1.81

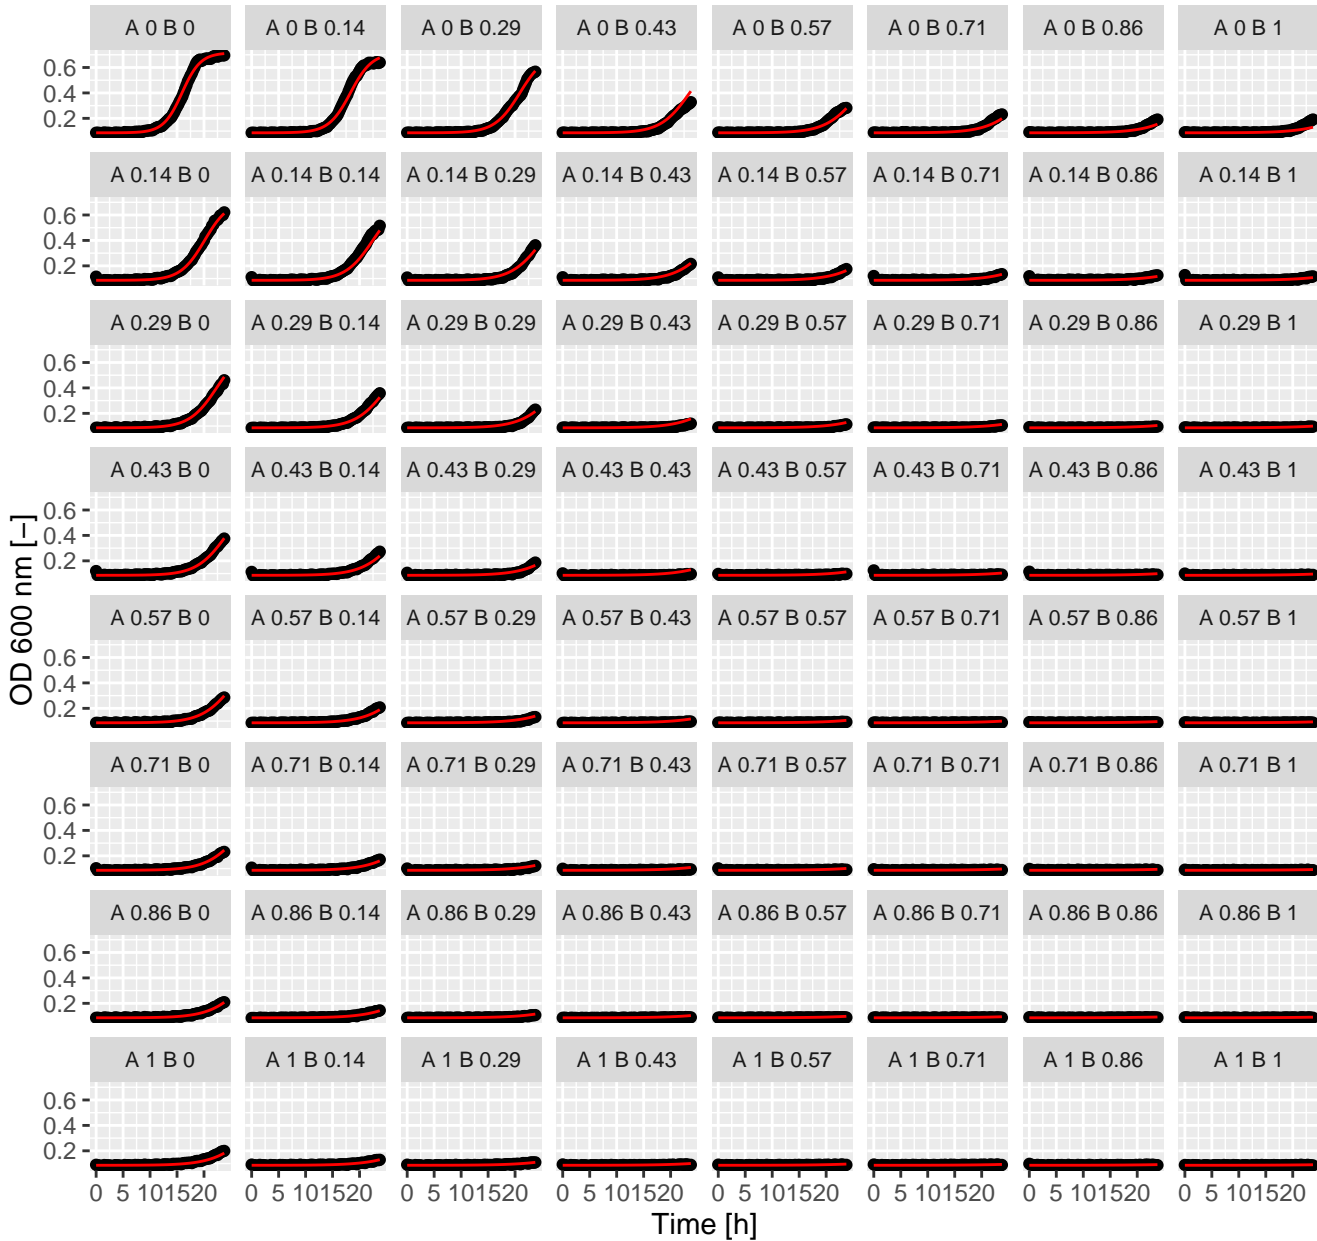

## 5FU.Tac (= Ax.Bx) Greco

alpha = 1.29

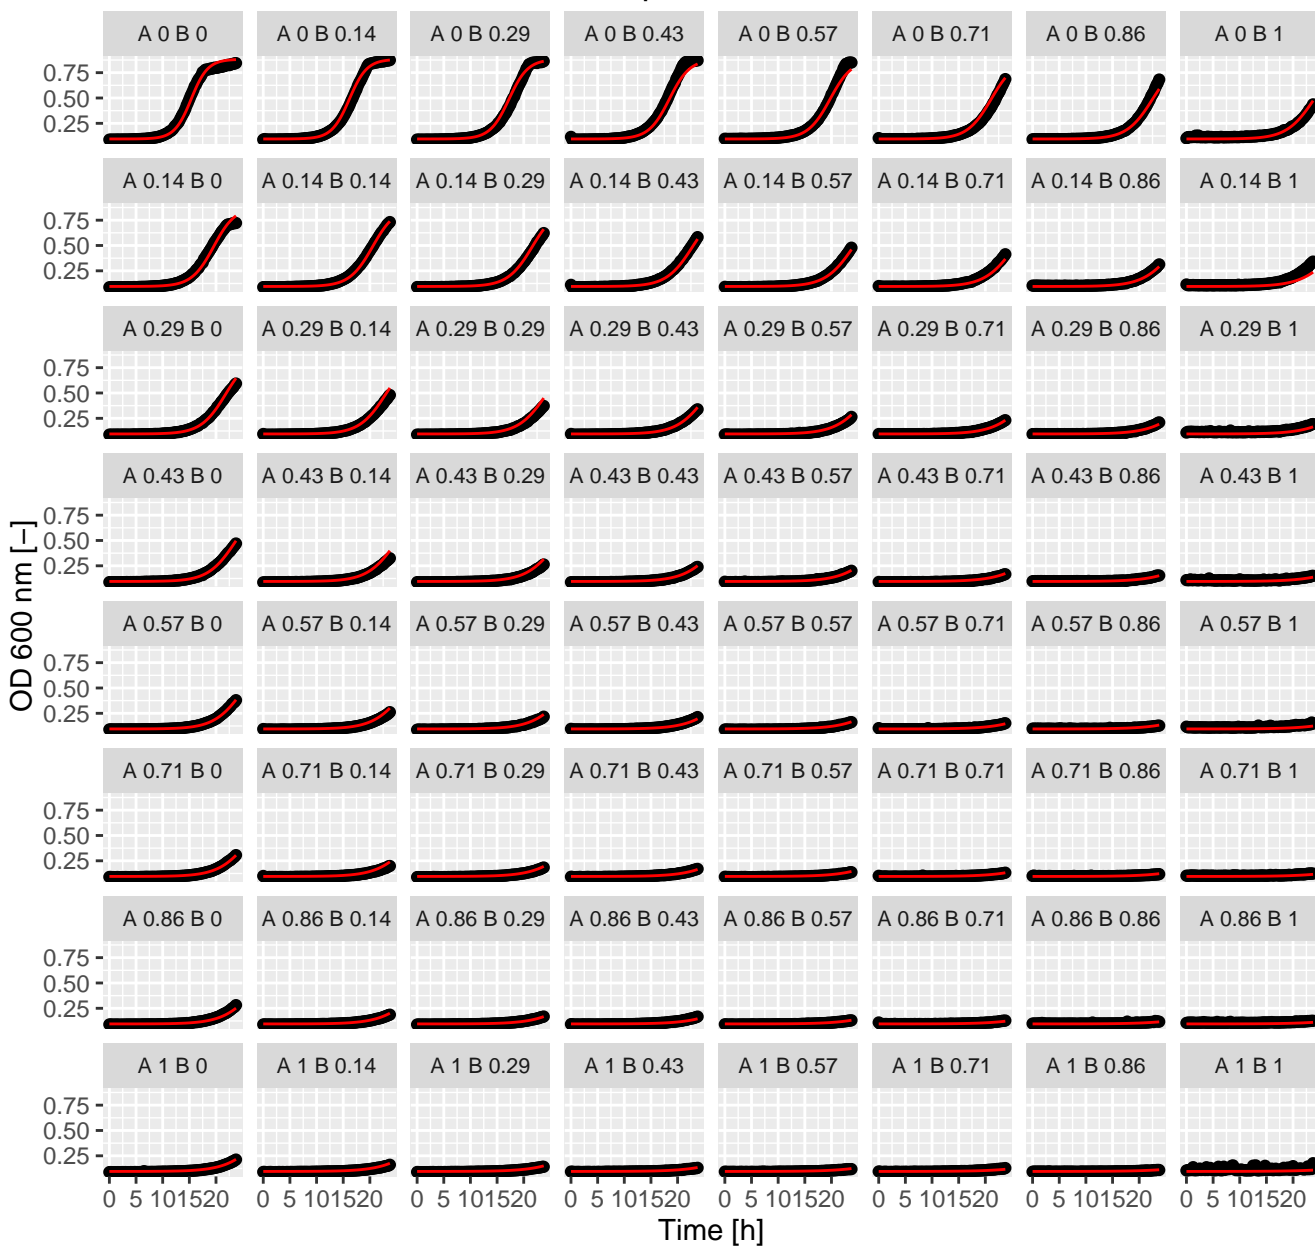

## 5FU.Sta (= Ax.Bx) Greco

 $\alpha = -0.88$ 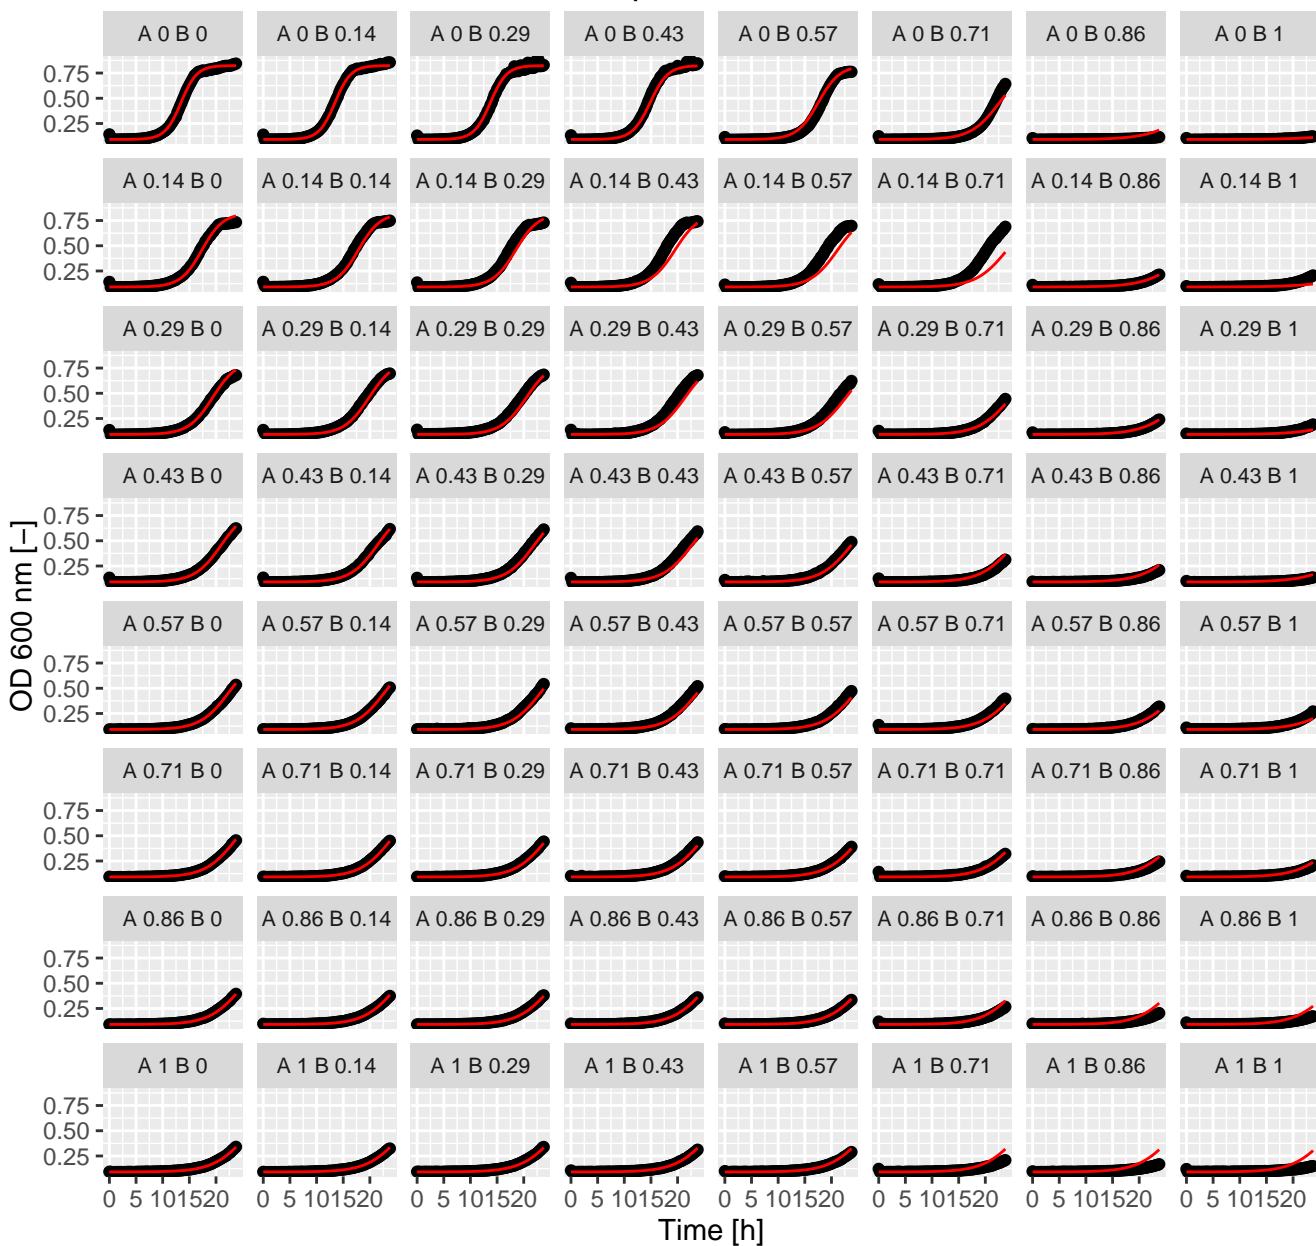

5FU.Pen (= Ax.Bx) Greco  
alpha = 0.91

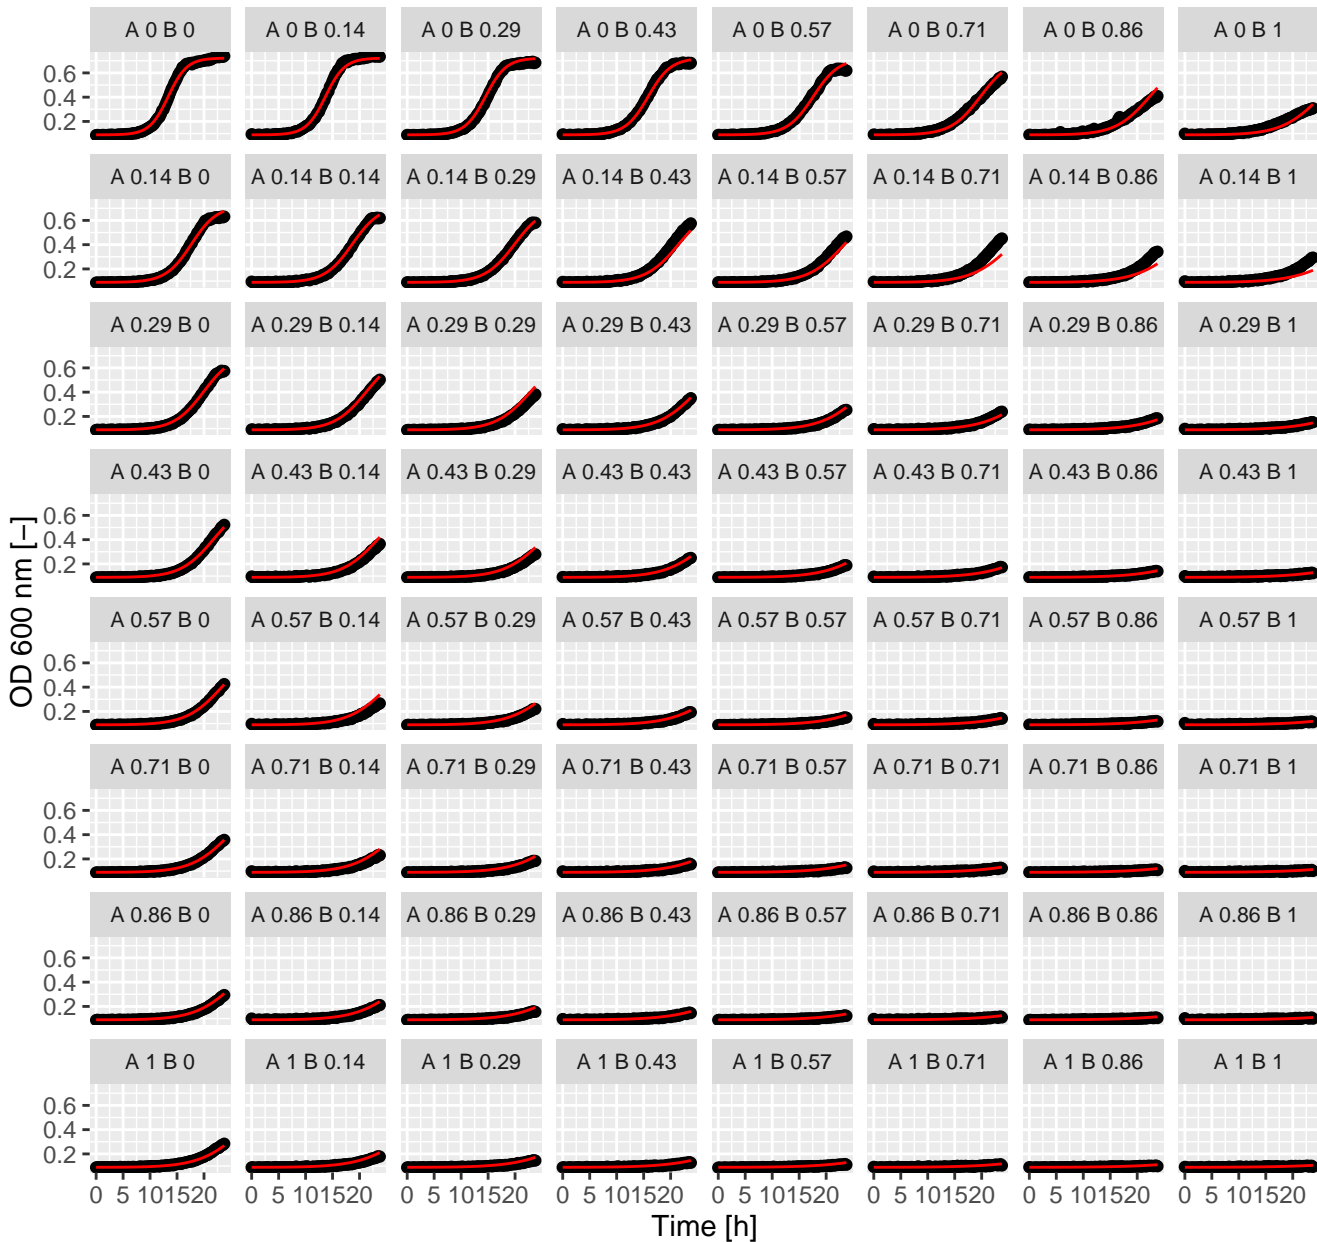

5FU.Lat (= Ax.Bx) Greco  
 $\alpha = -1.22$

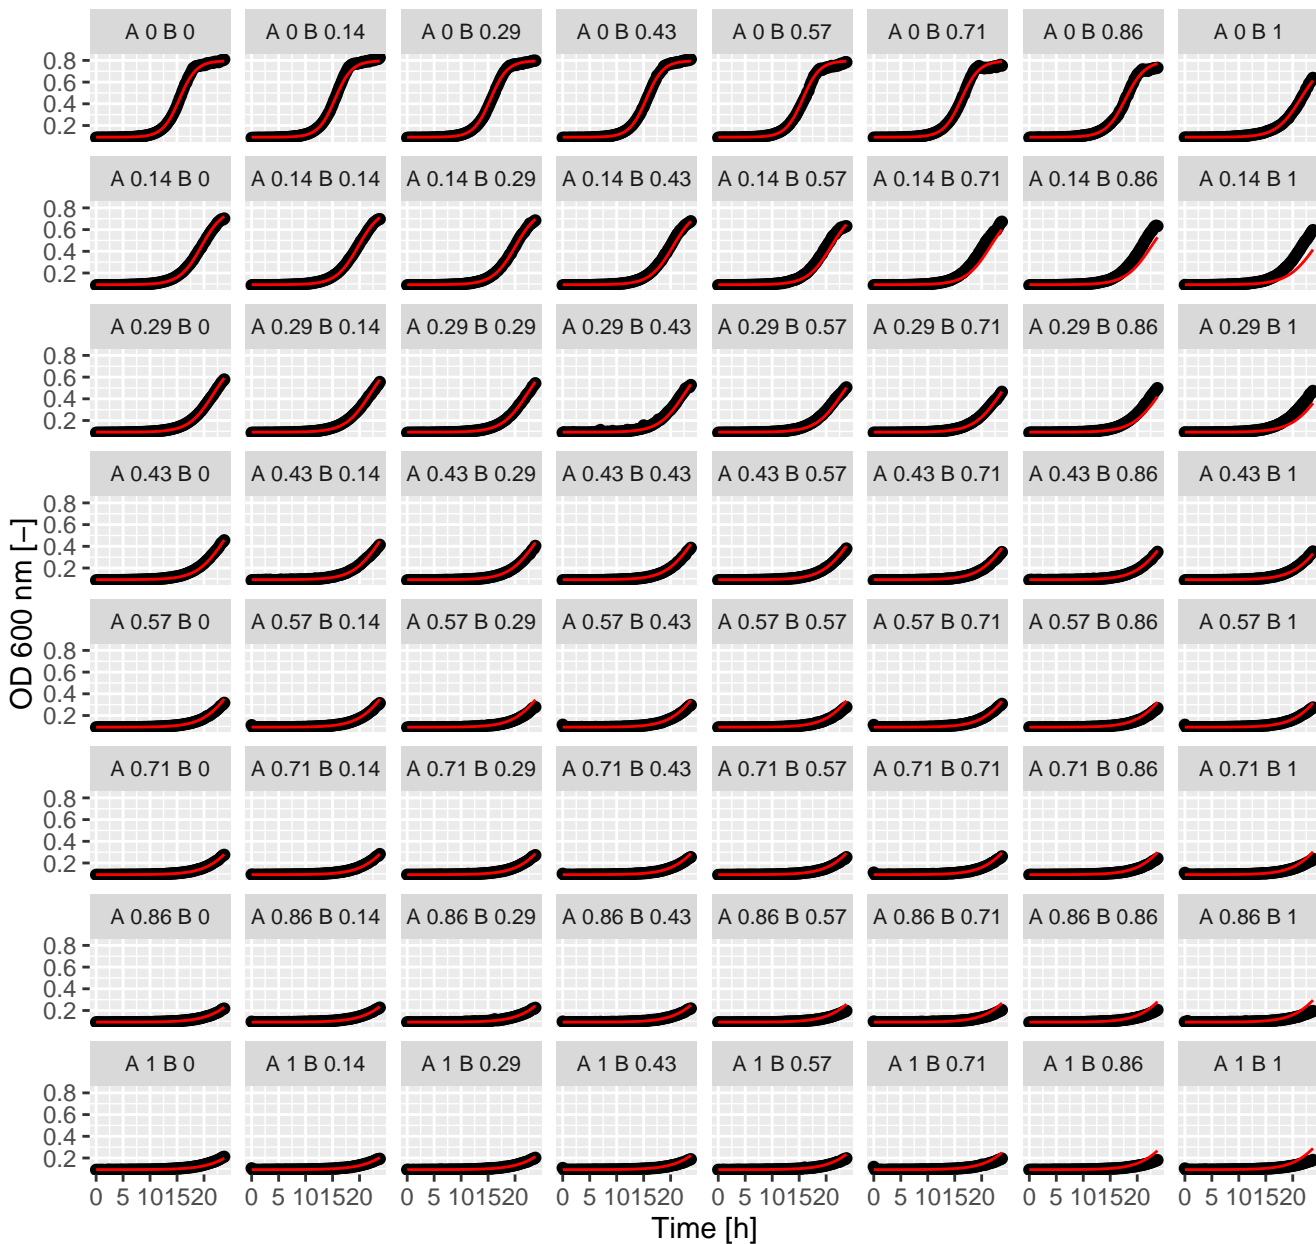

## 5FU.Ben (= Ax.Bx) Greco

 $\alpha = -0.48$ 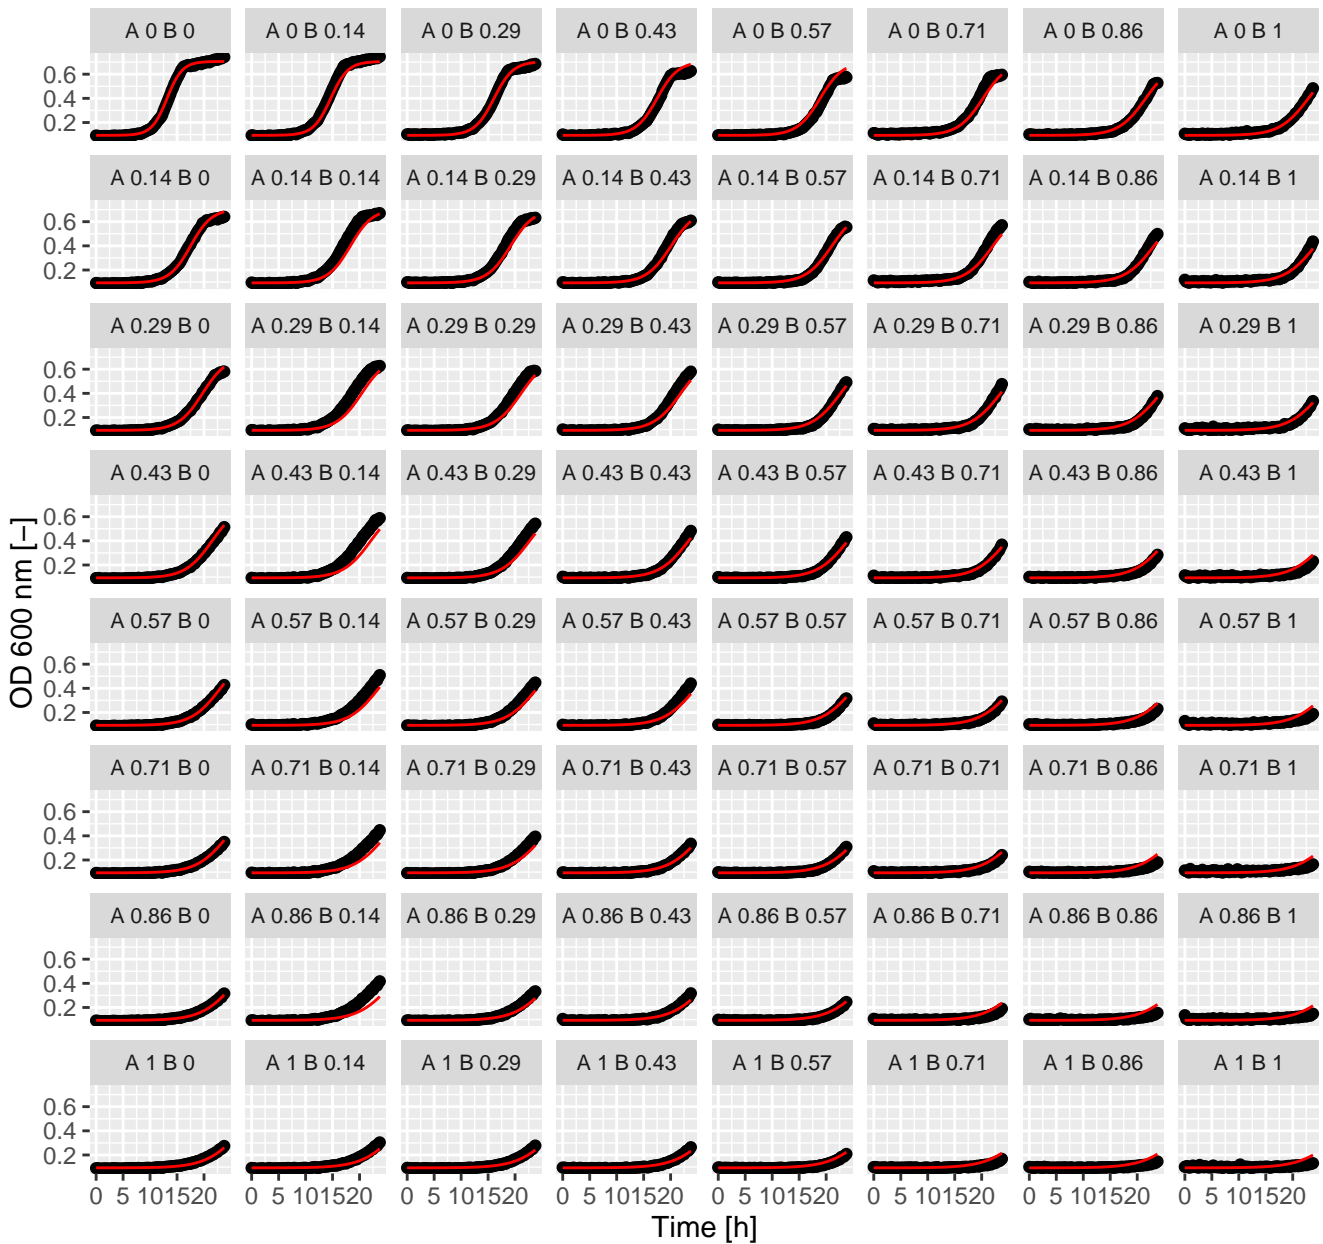



5FU.5FU (= Ax.Bx) Emp. Bliss  
beta = 1.79

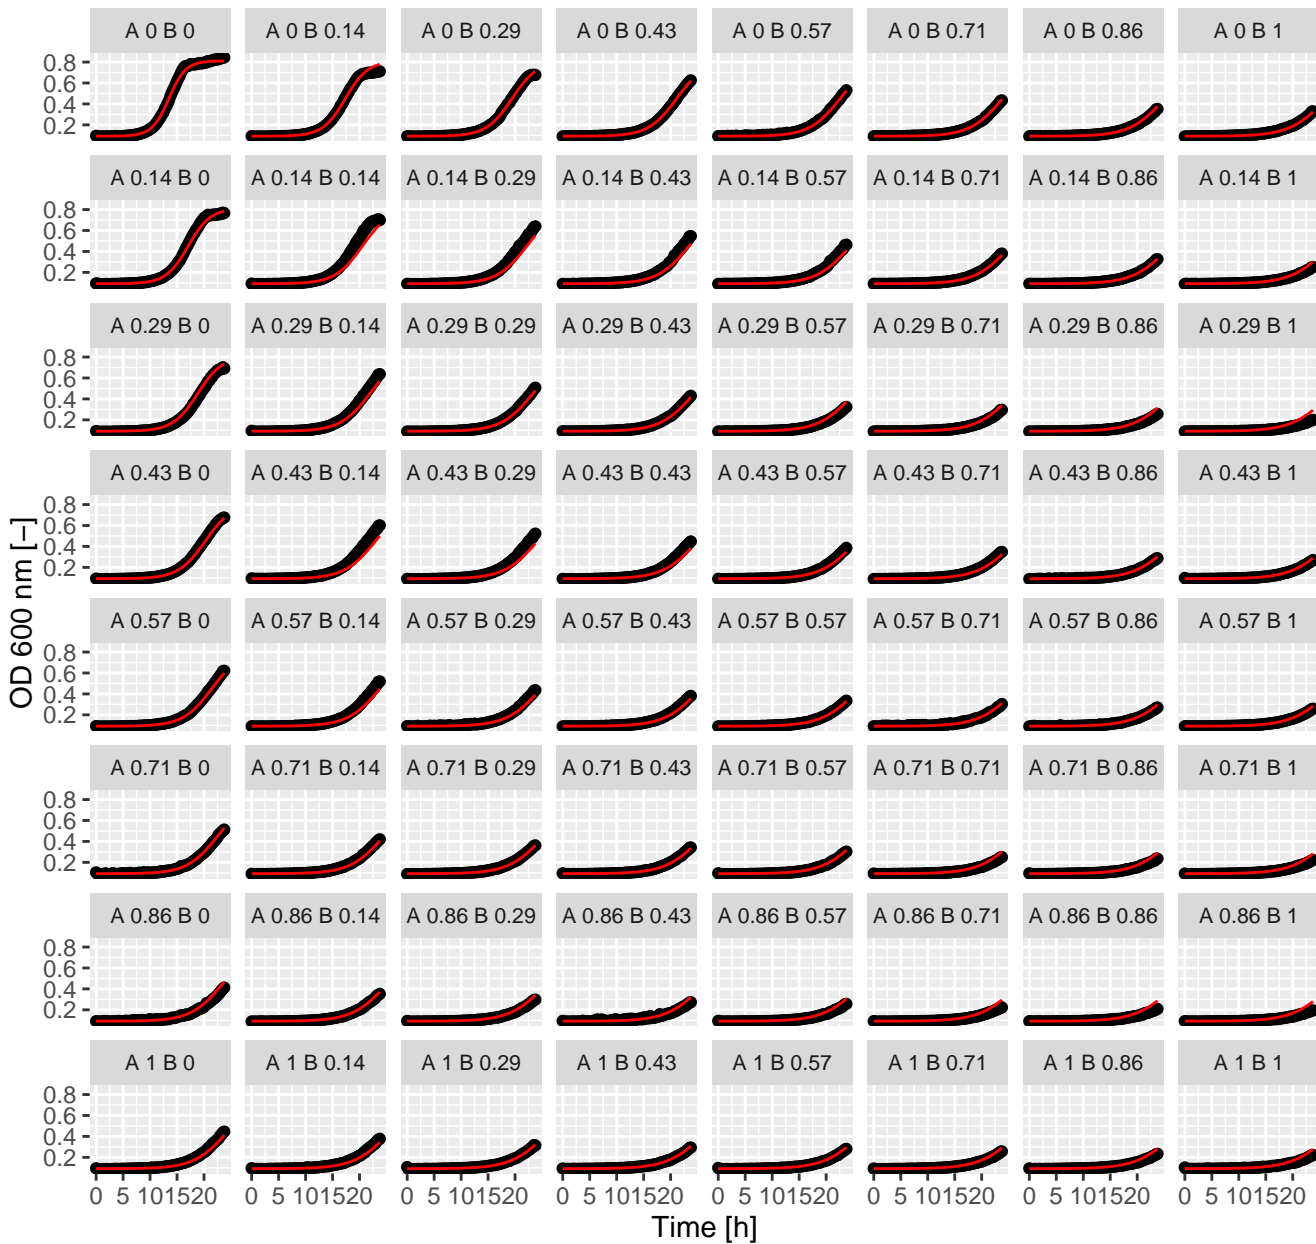

5FU.Ben (= Ax.Bx) Emp. Bliss  
 beta = 1.82

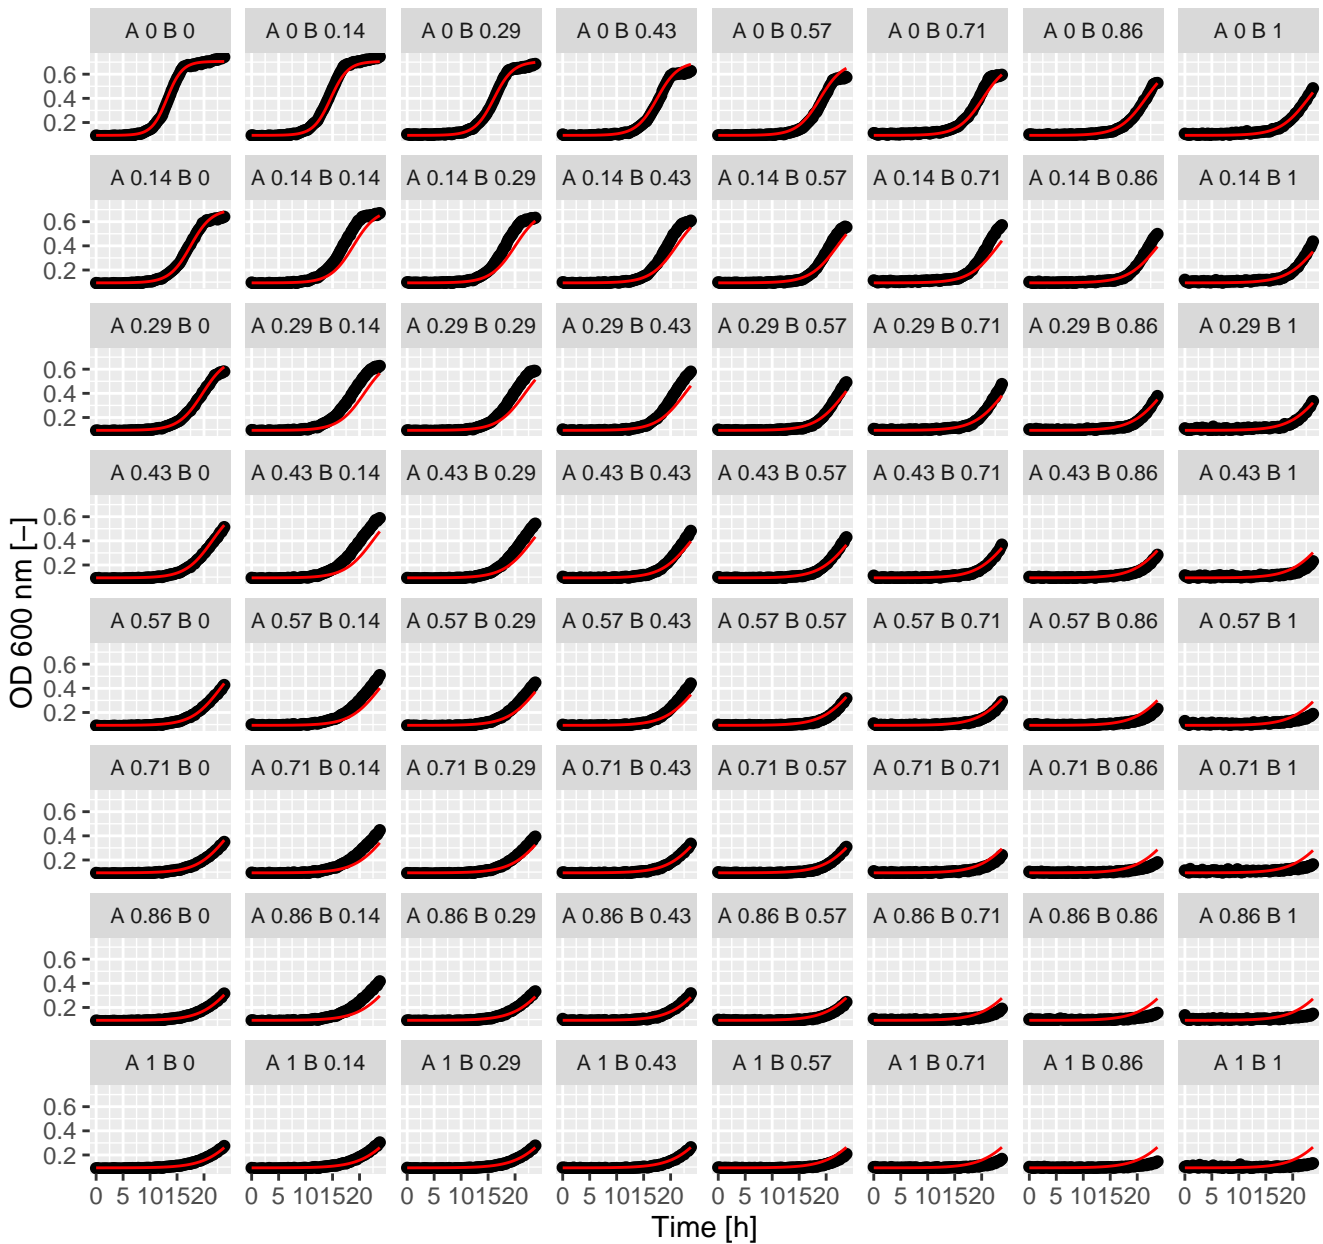

5FU.Lat (= Ax.Bx) Emp. Bliss  
beta = 2.2

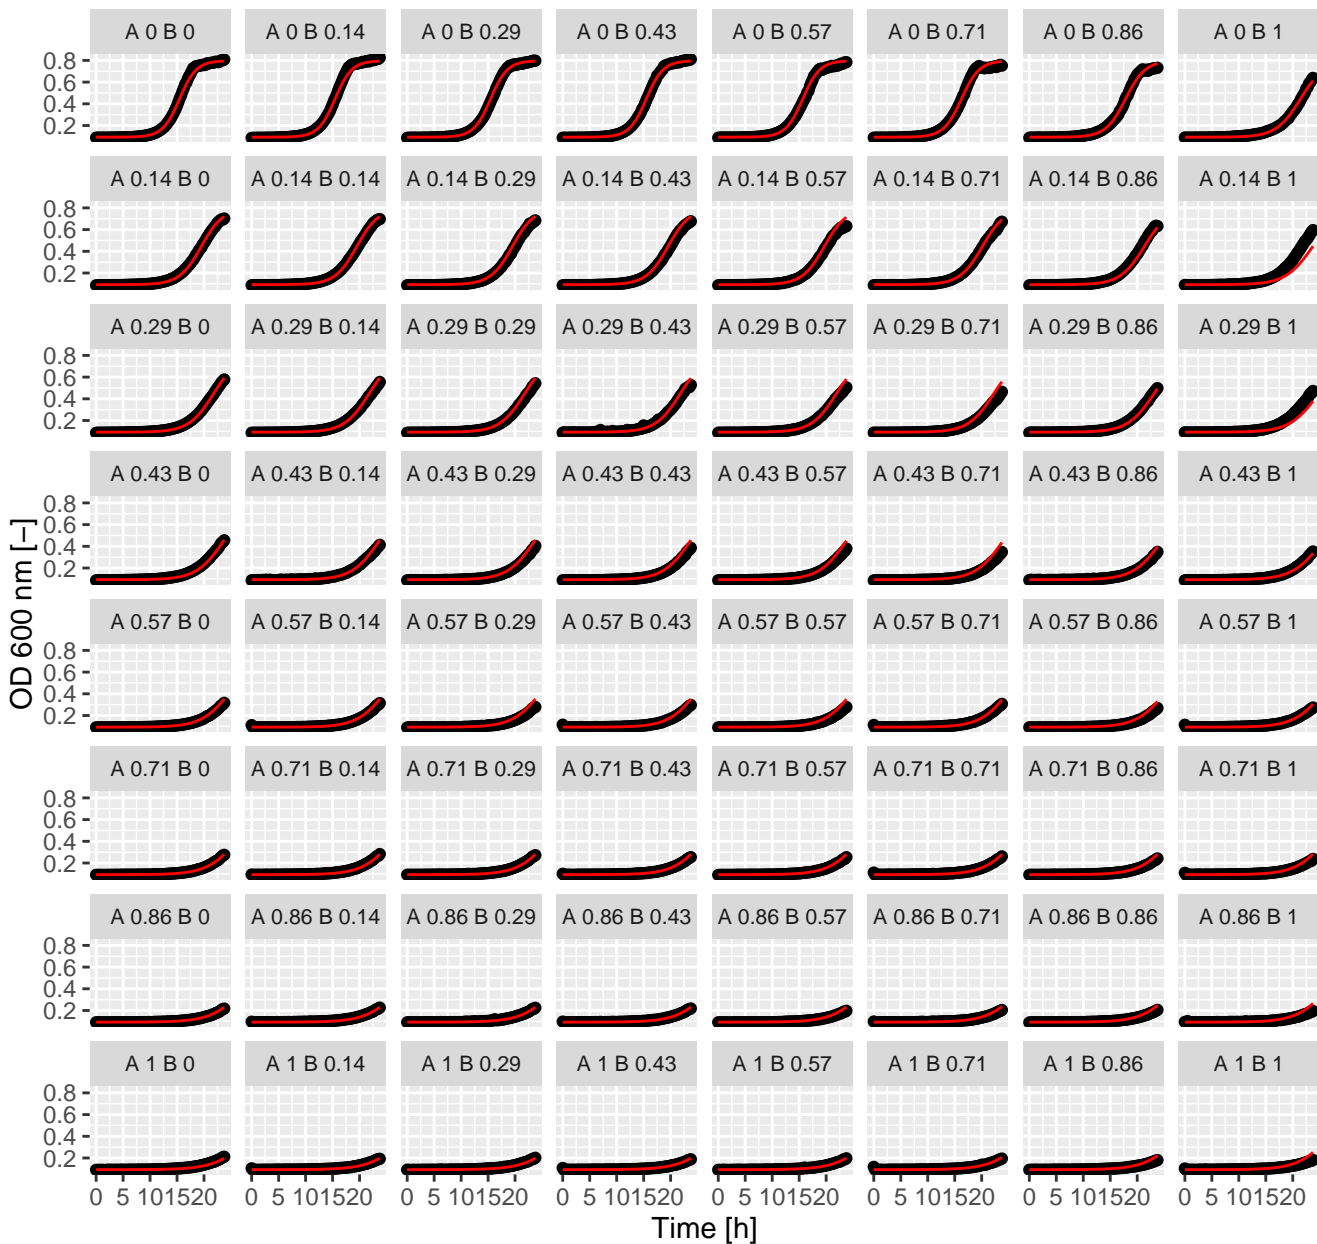

5FU.Pen (= Ax.Bx) Emp. Bliss  
beta = 0.8

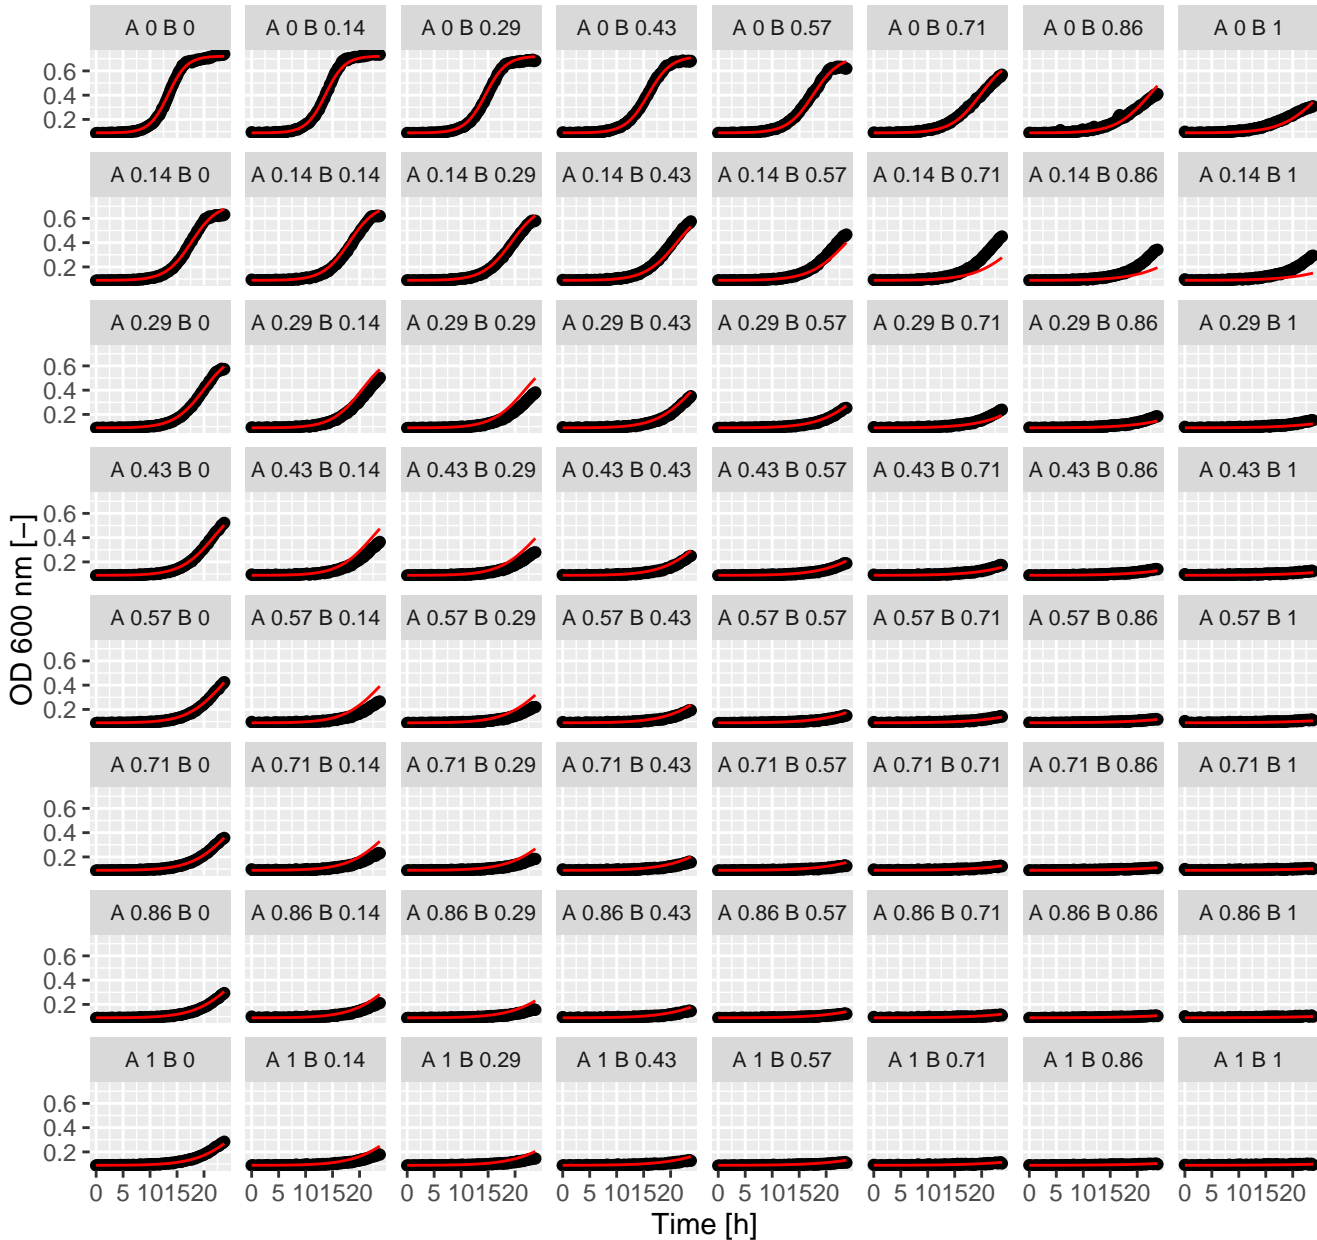

5FU.Sta (= Ax.Bx) Emp. Bliss  
beta = 1.83

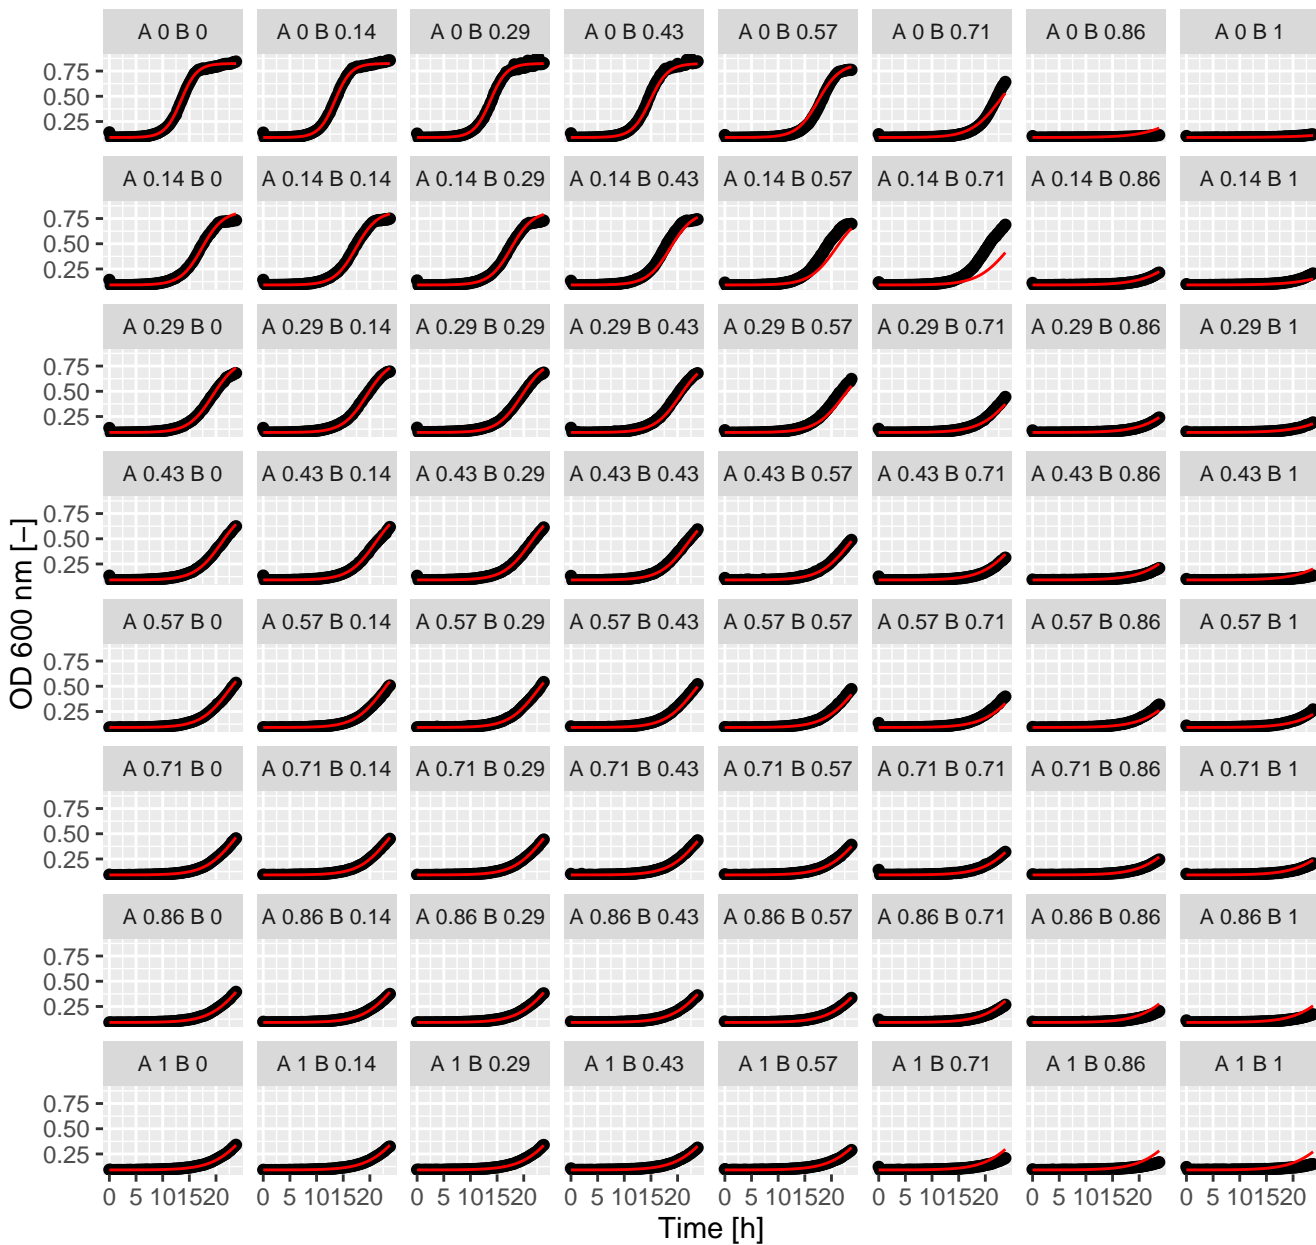

5FU.Tac (= Ax.Bx) Emp. Bliss  
beta = 1.25

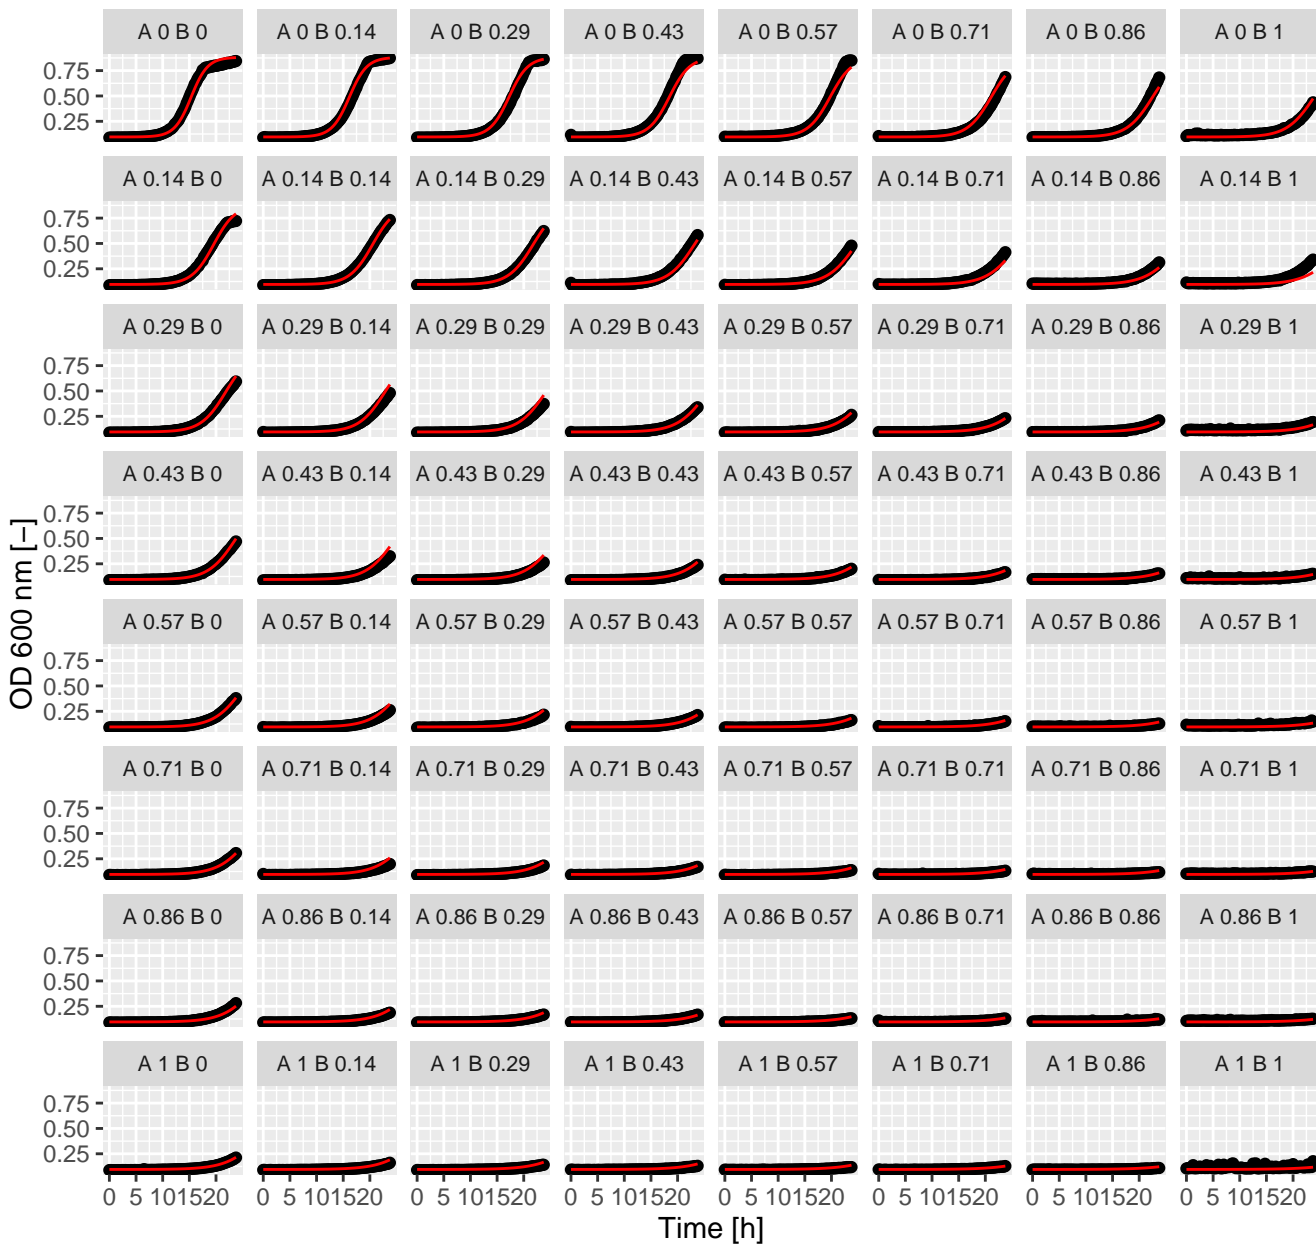

5FU.Ter (= Ax.Bx) Emp. Bliss  
beta = 1.17

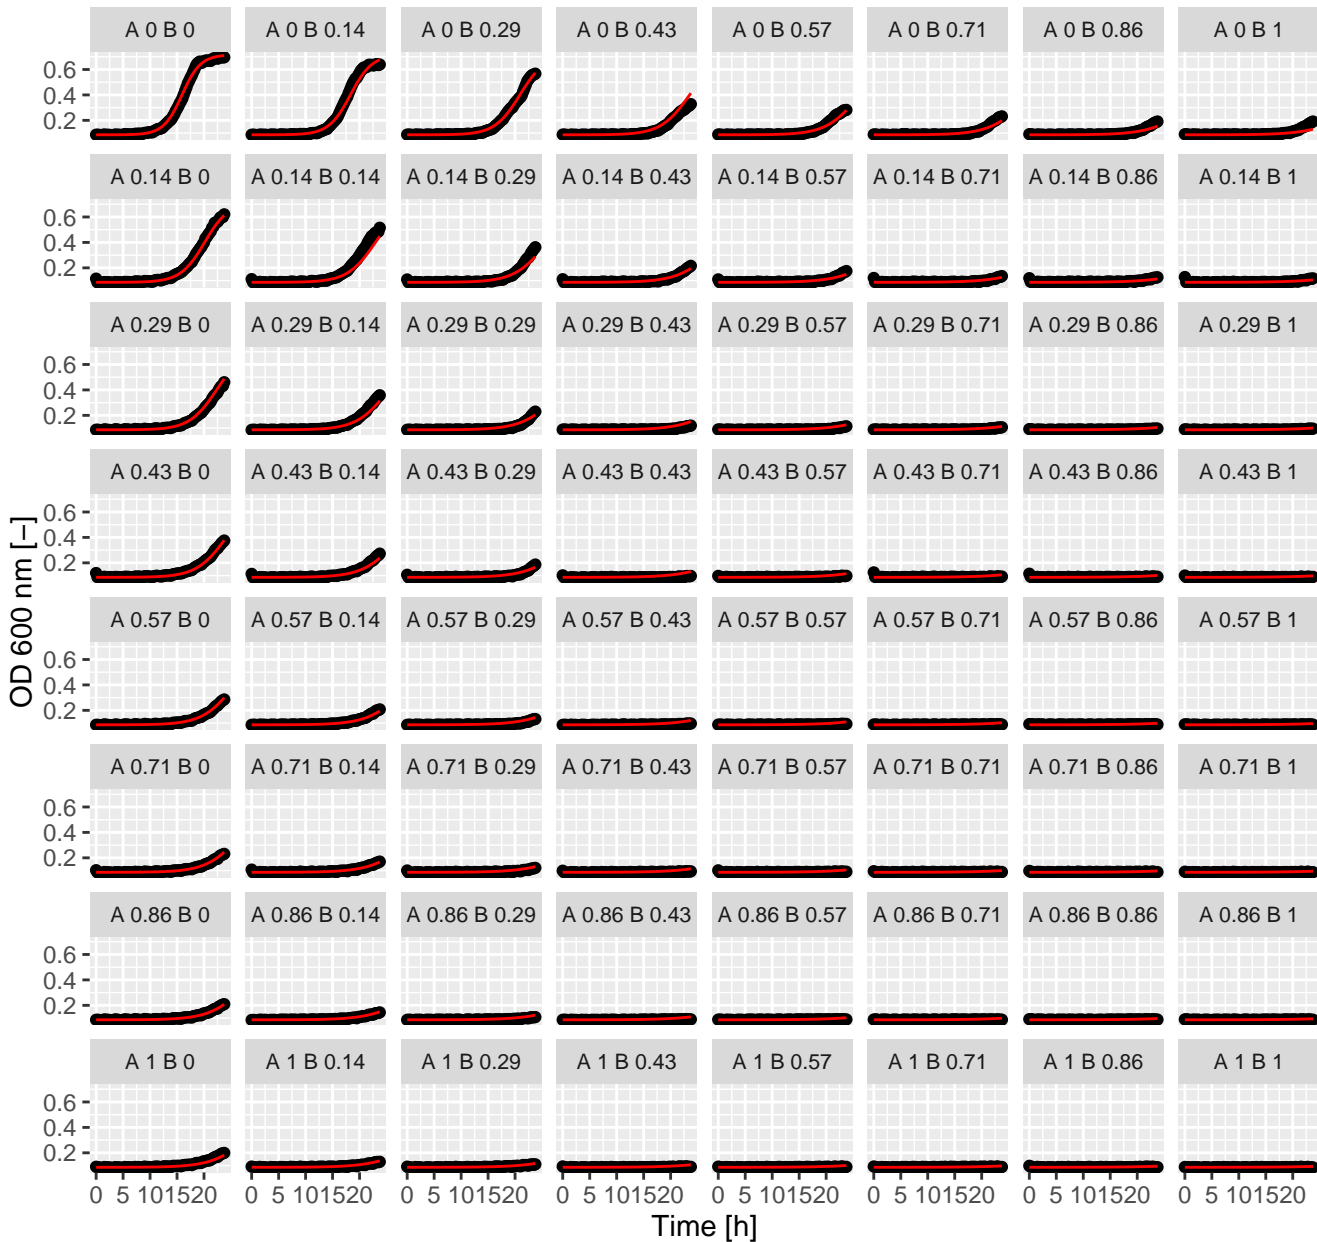

AbA.Lit (= Ax.Bx) Emp. Bliss  
beta = 1.7

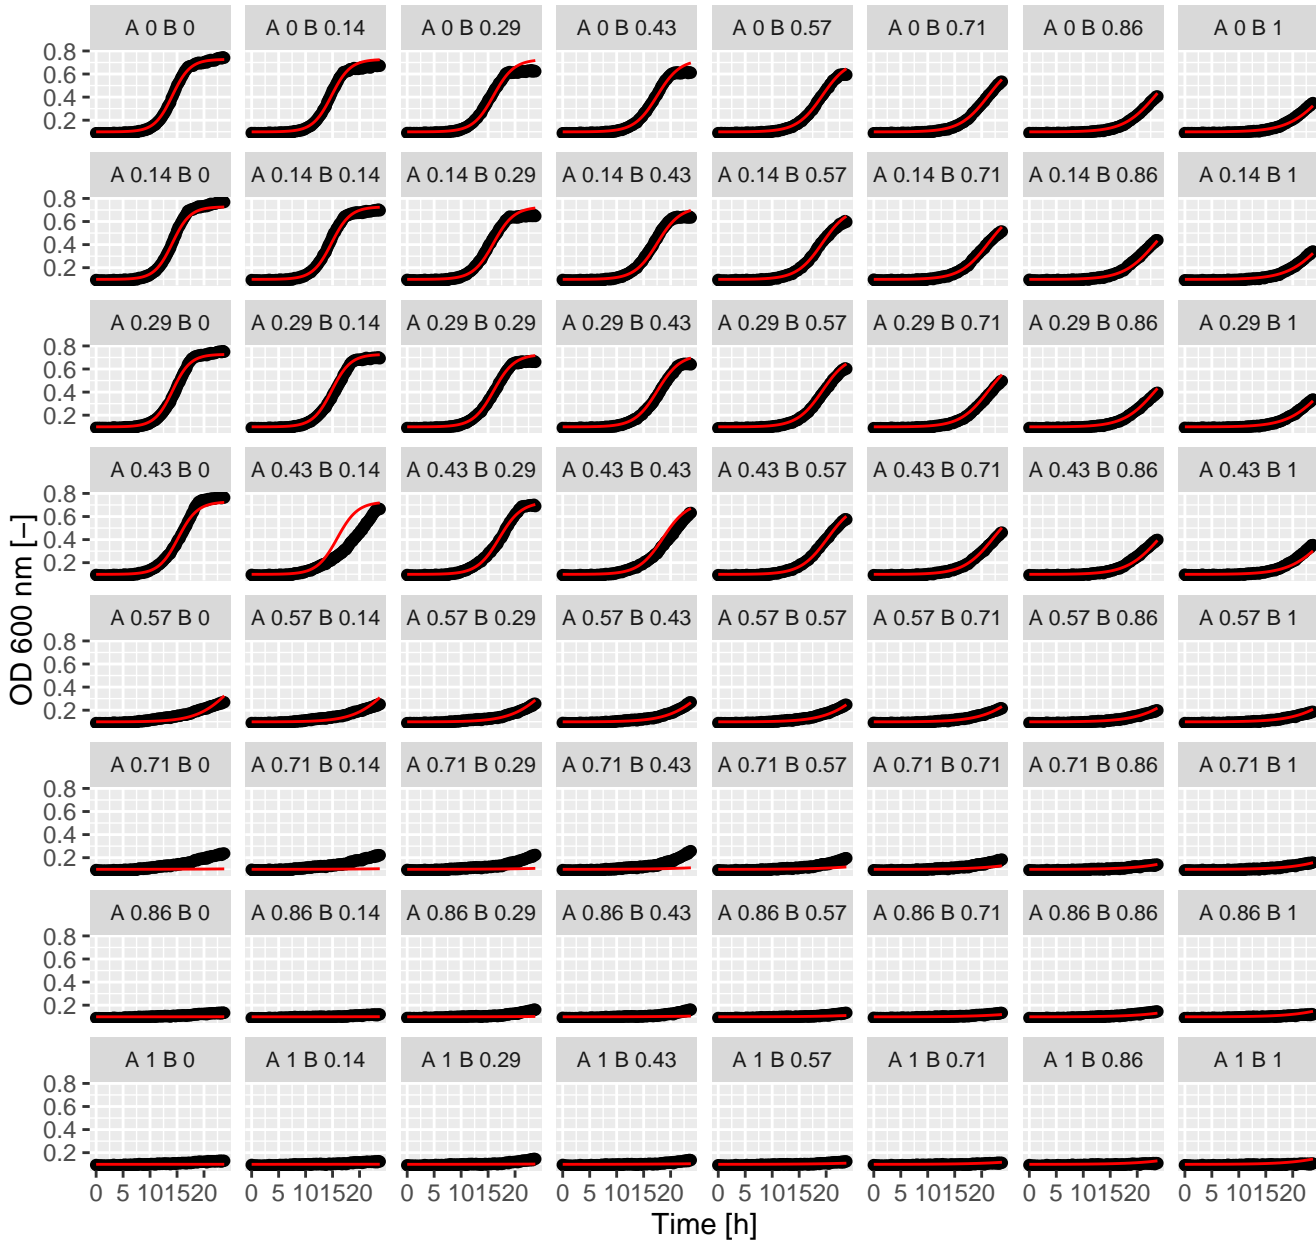



## AbA.Wor (= Ax.Bx) Emp. Bliss

beta = -29.66

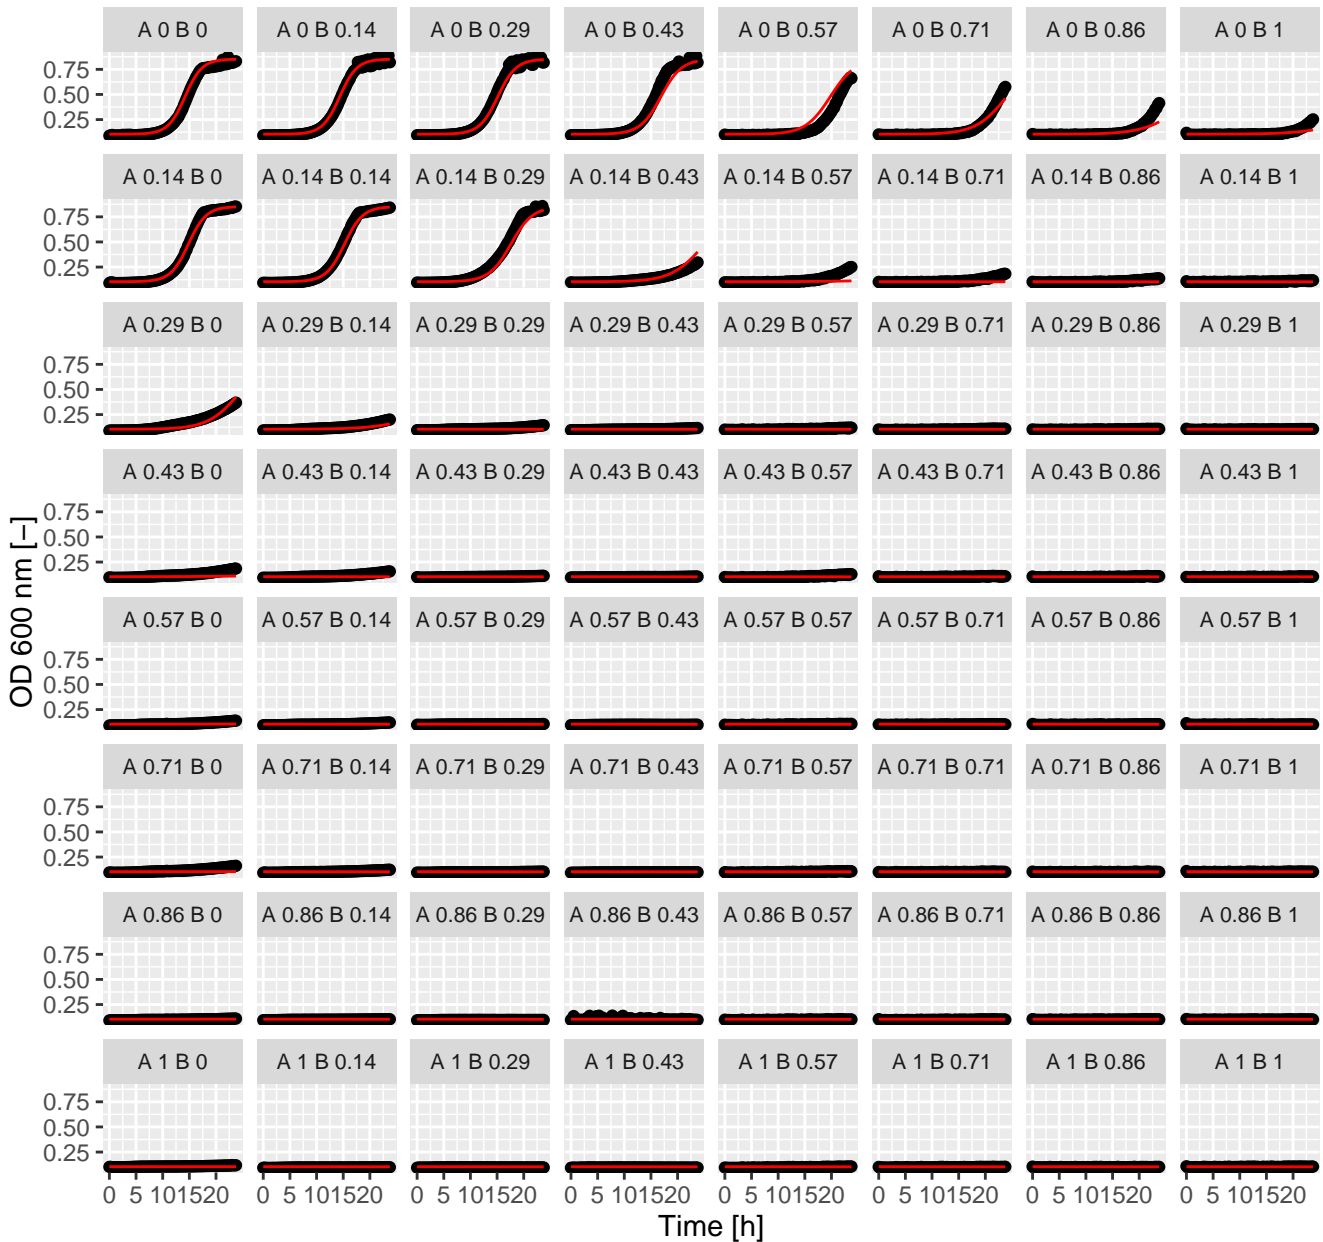

AmB.AmB (= Ax.Bx) Emp. Bliss  
beta = -658

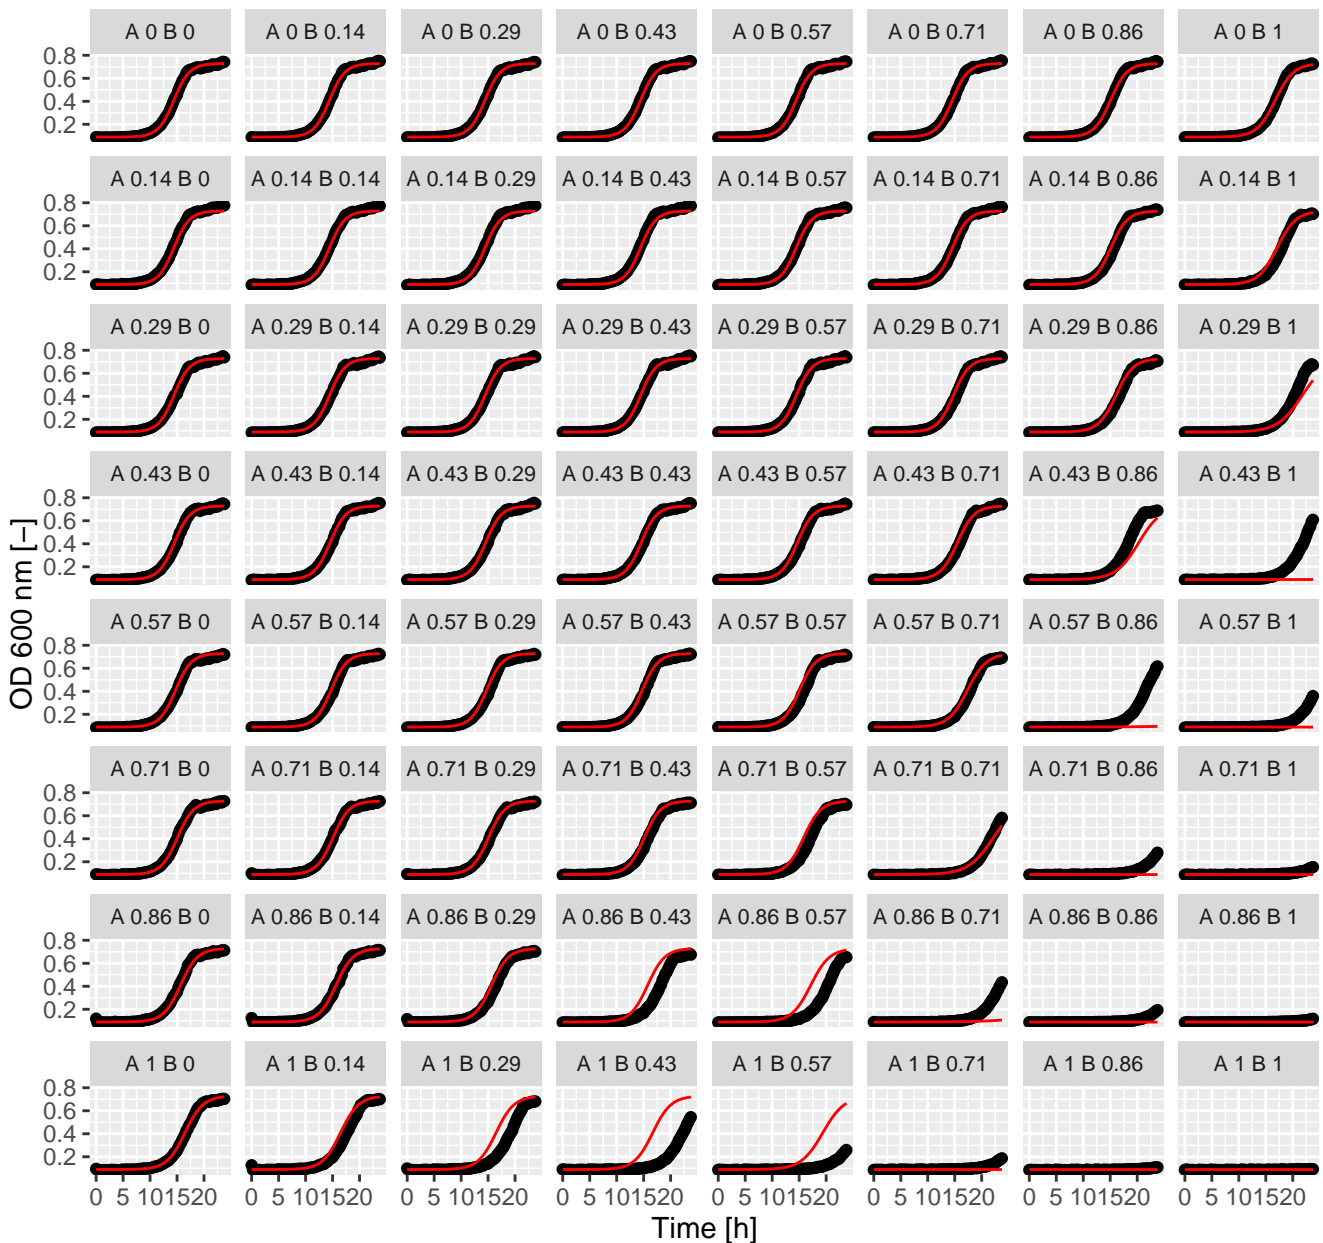

AmB.Ben (= Ax.Bx) Emp. Bliss  
beta = 2.3

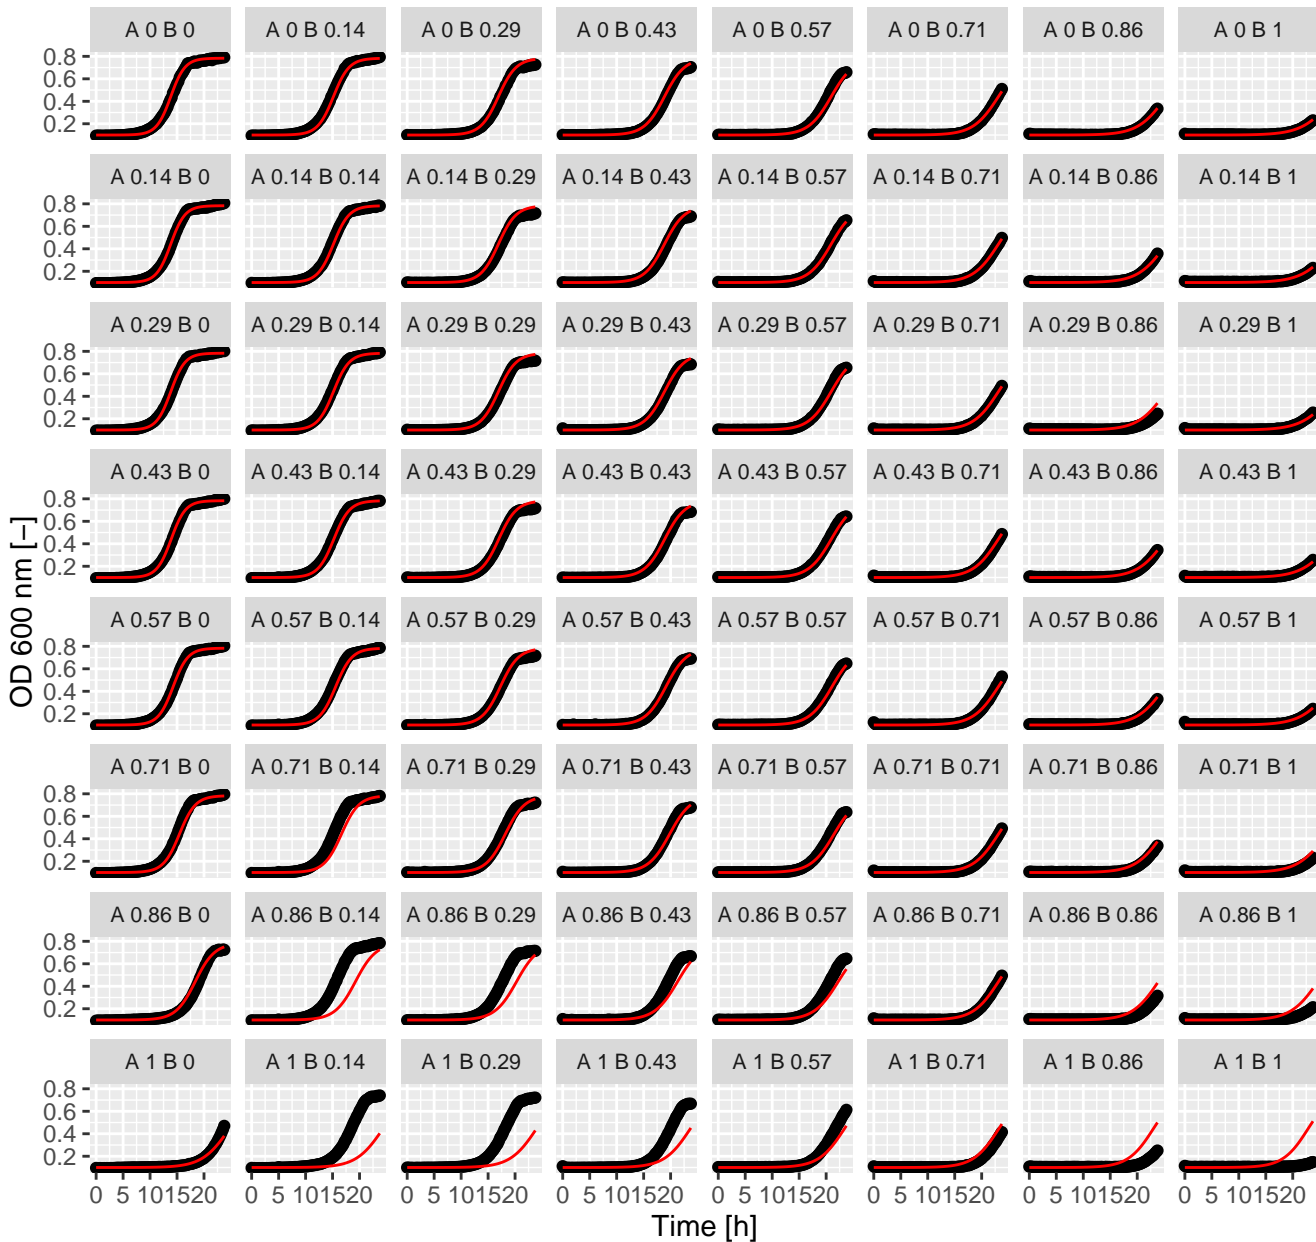

AmB.Pen (= Ax.Bx) Emp. Bliss  
beta = -0.48

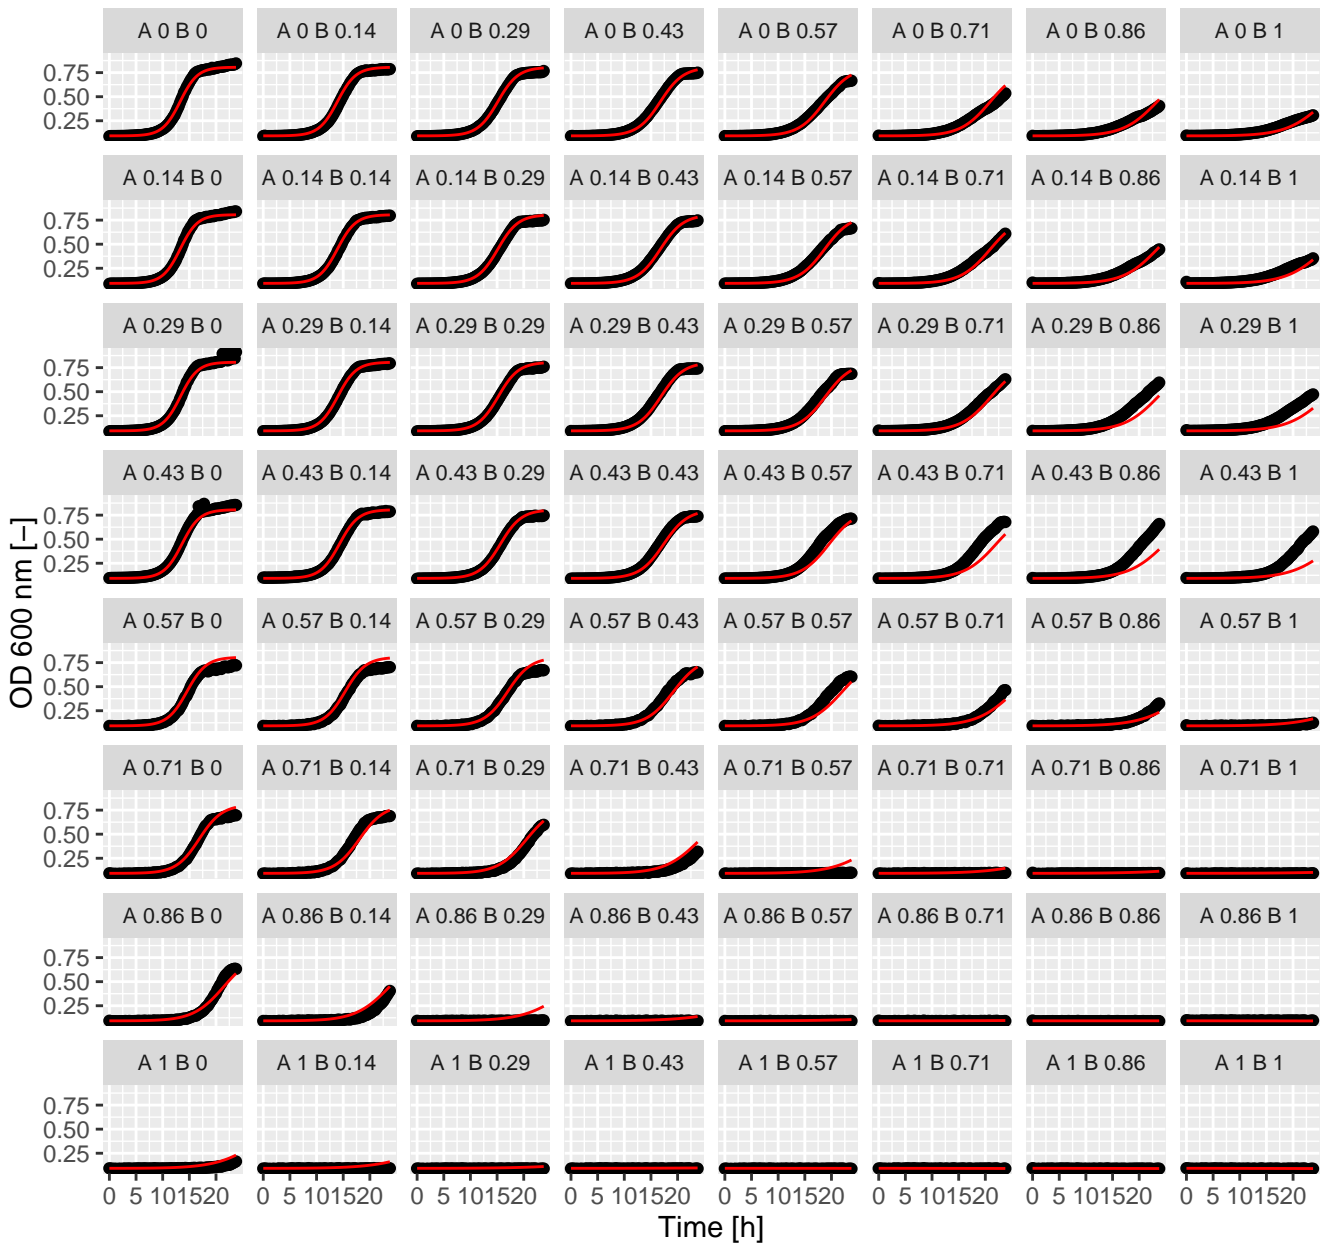

AmB.Sta (= Ax.Bx) Emp. Bliss  
beta = 2.19

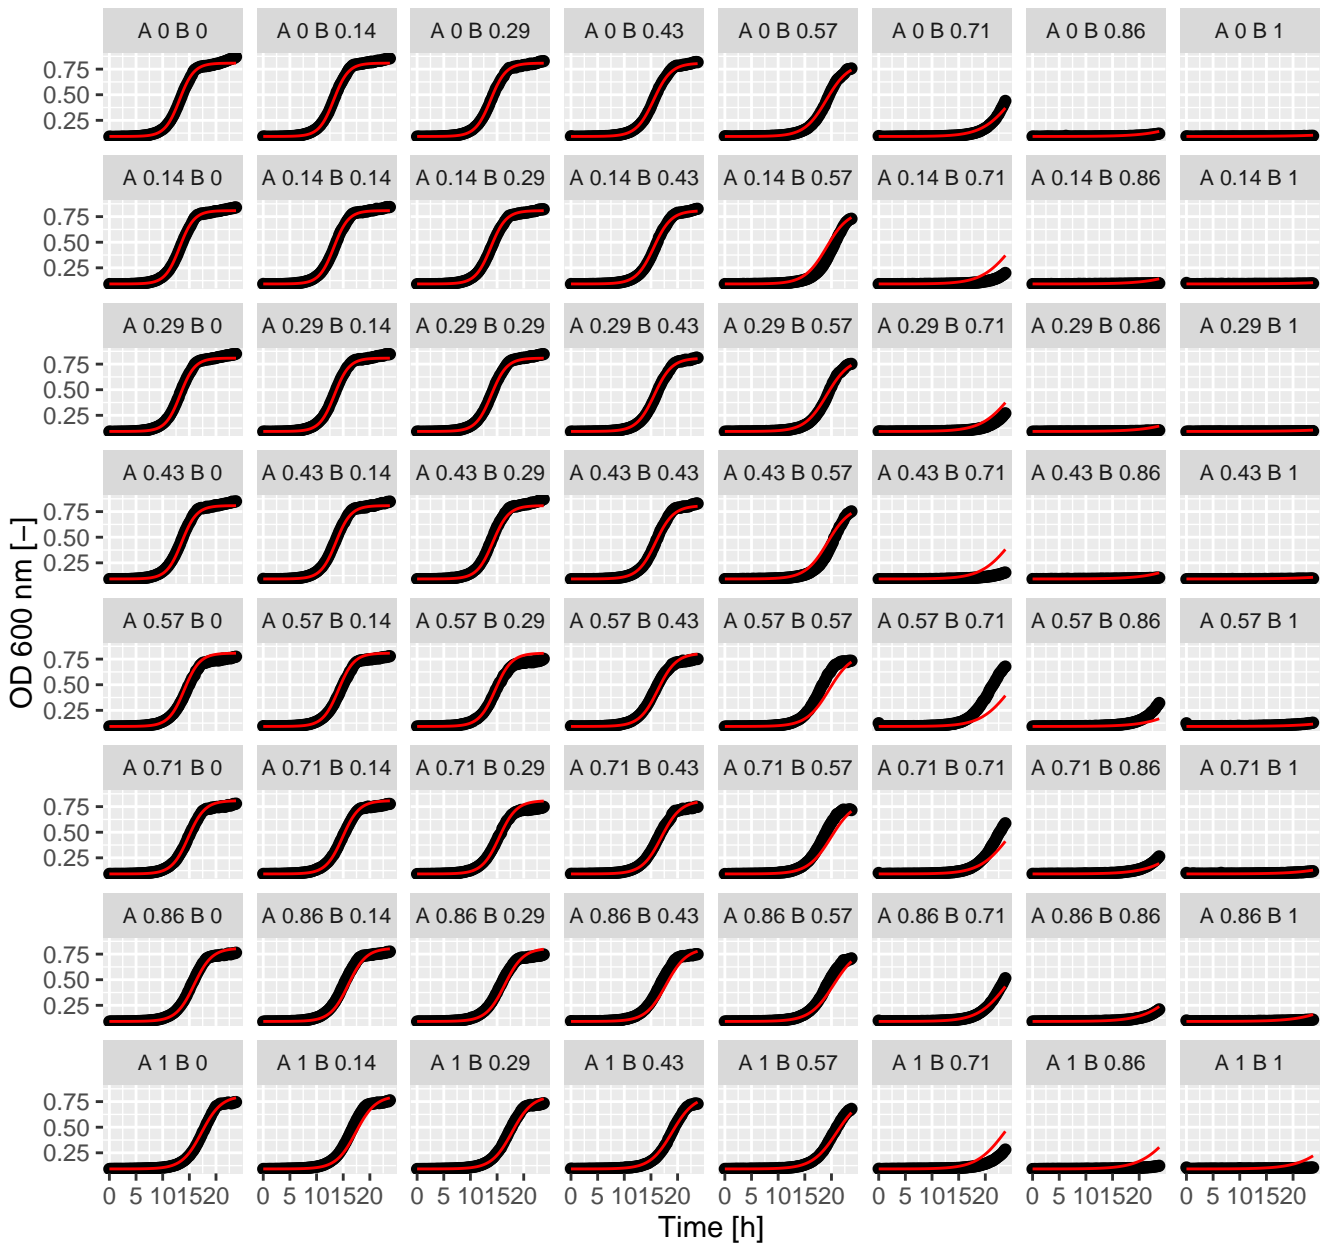

AmB.Tac (= Ax.Bx) Emp. Bliss  
beta = 2.9

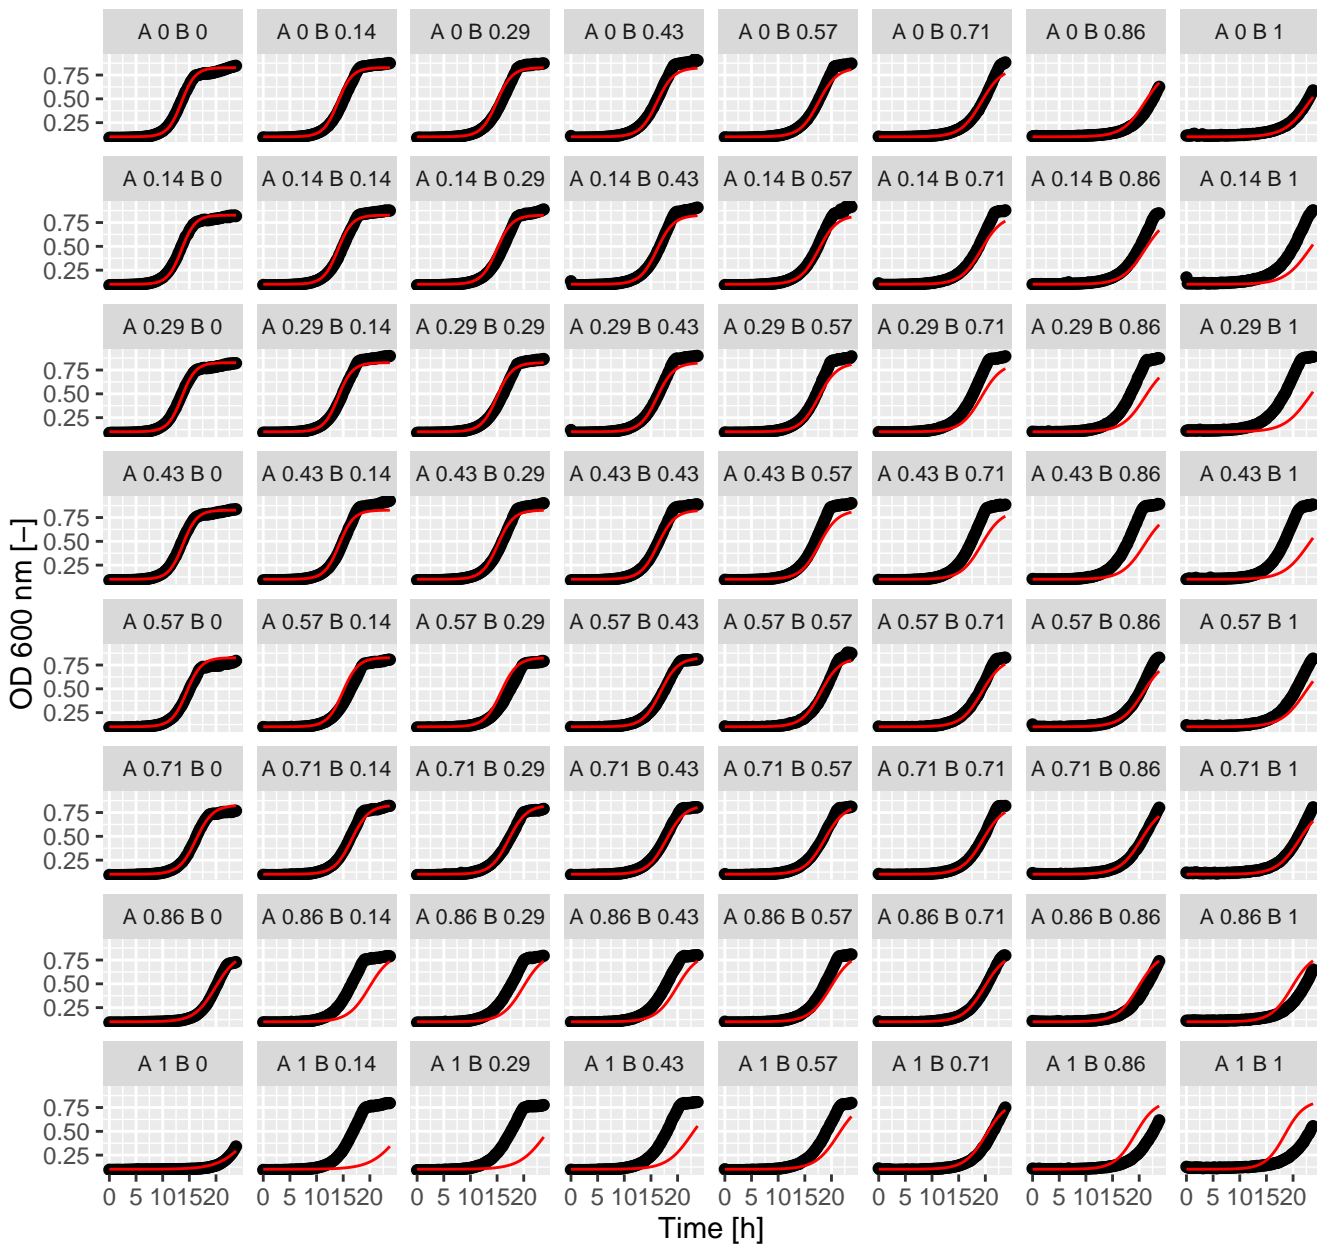

AmB.Ter (= Ax.Bx) Emp. Bliss  
beta = 2.51

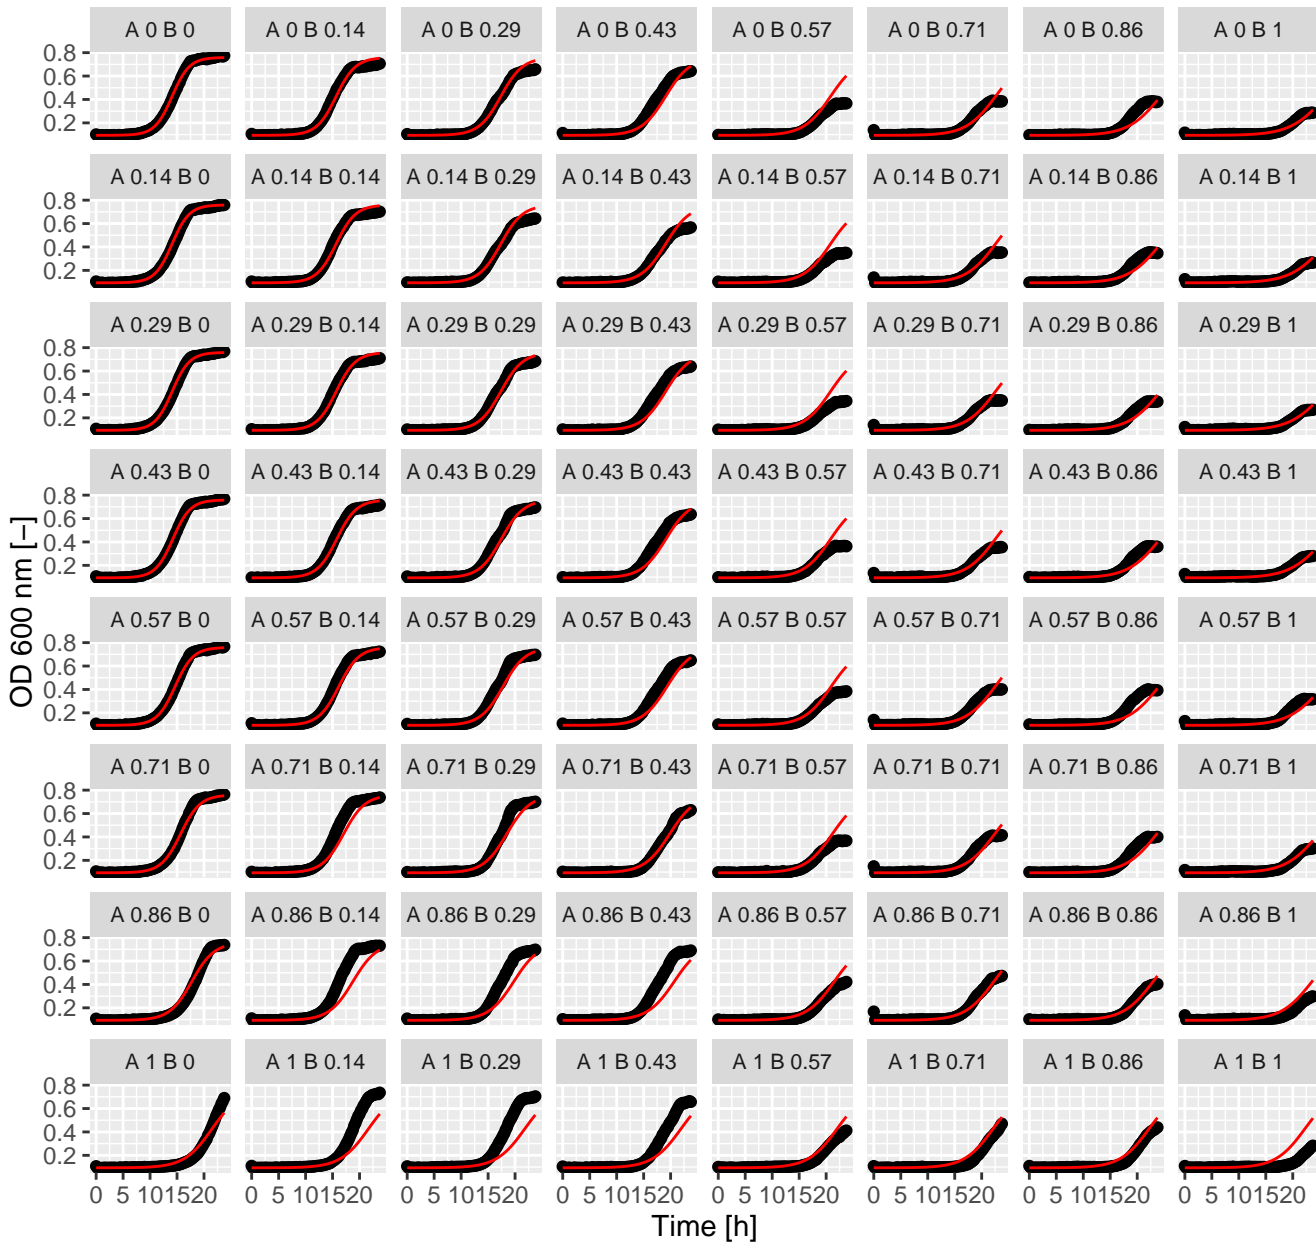

Ani Ani (= Ax.Bx) Emp. Bliss  
beta = -73.55

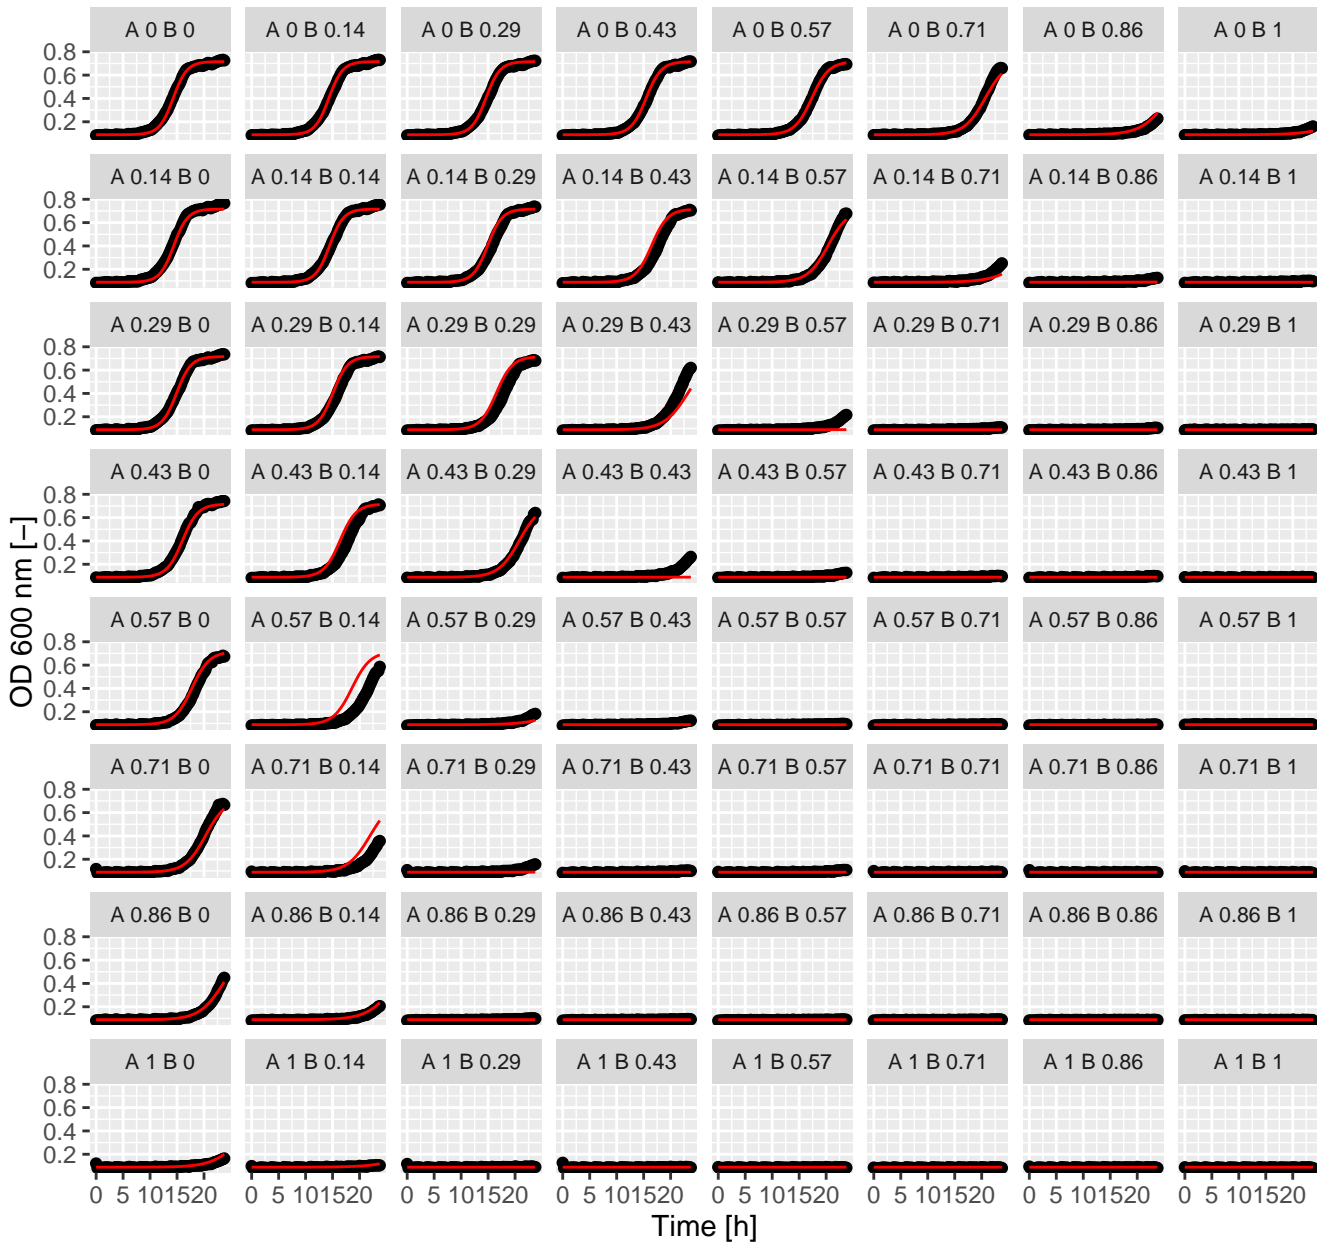



Ani.Ben (= Ax.Bx) Emp. Bliss  
beta = 1.44

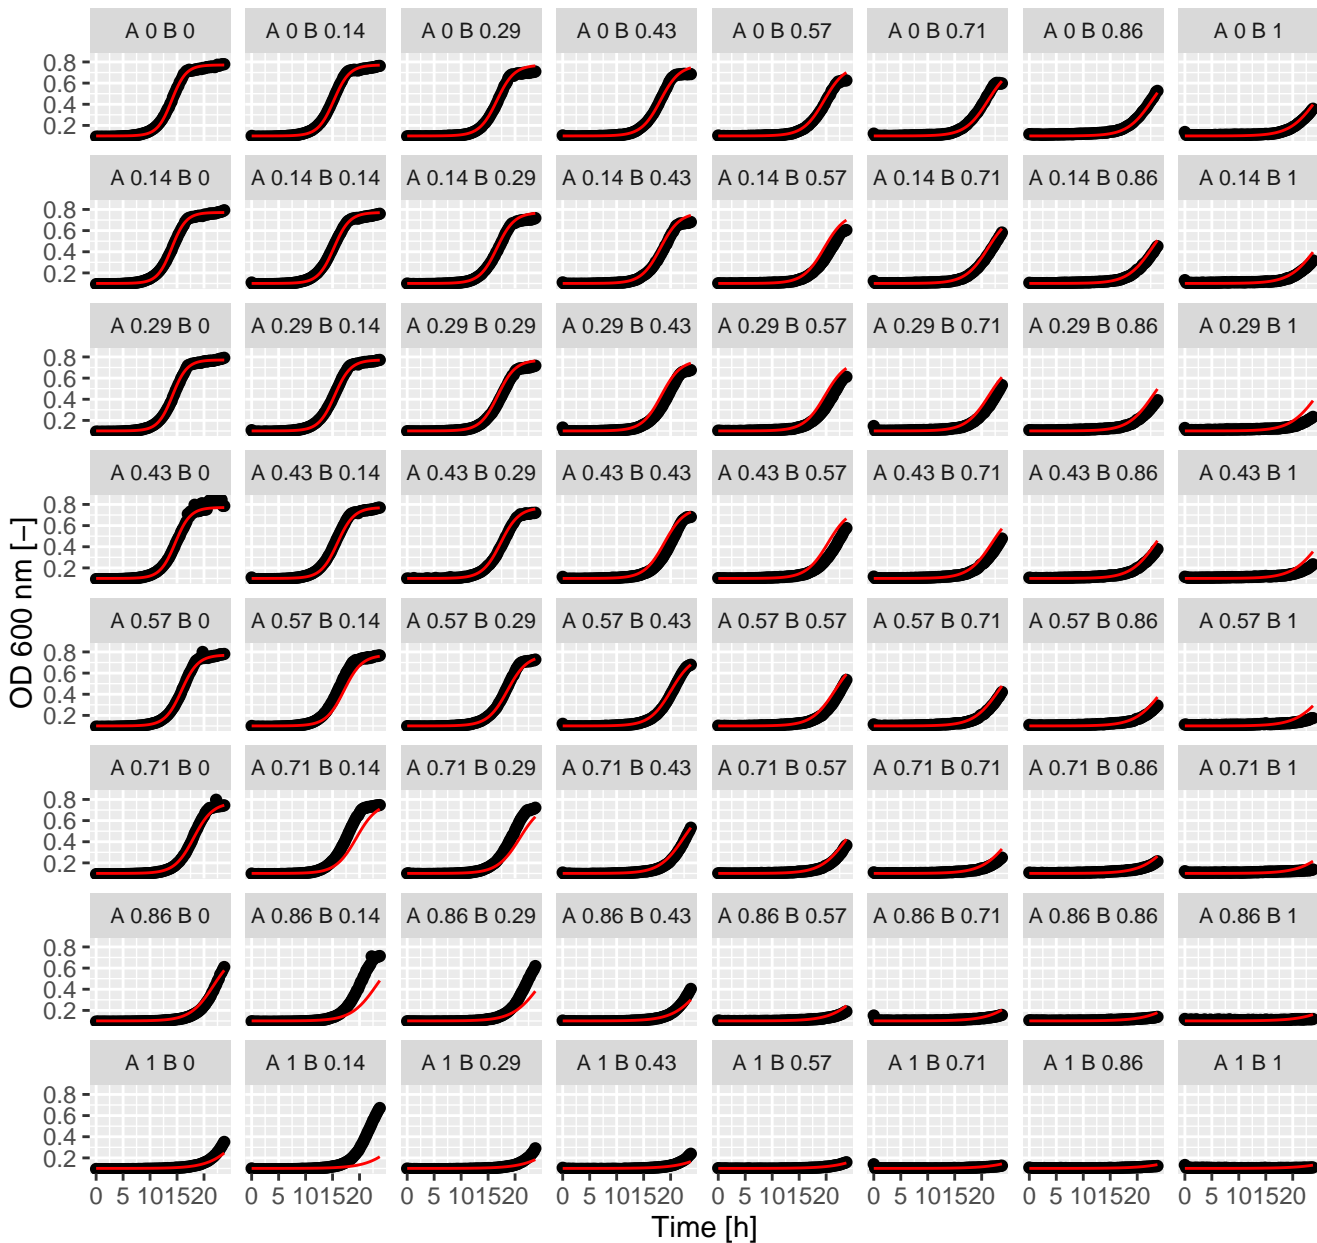

Ani.Lat (= Ax.Bx) Emp. Bliss  
beta = 1.6

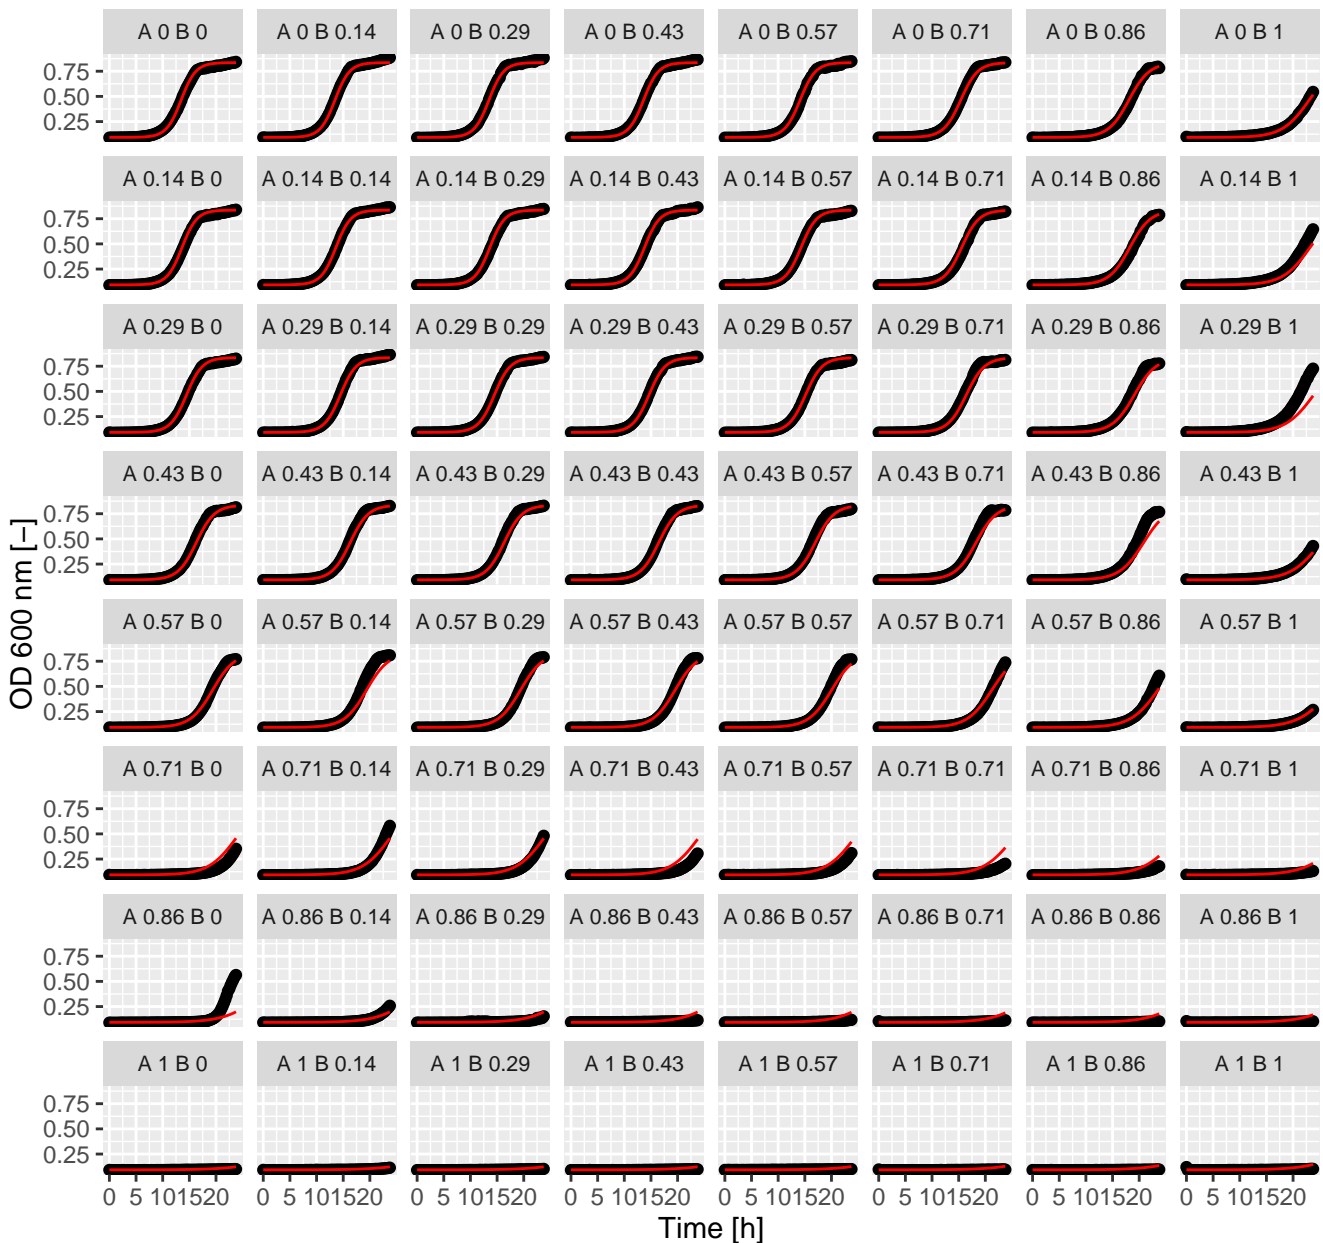

Ani.Pen (= Ax.Bx) Emp. Bliss  
beta = 0.04

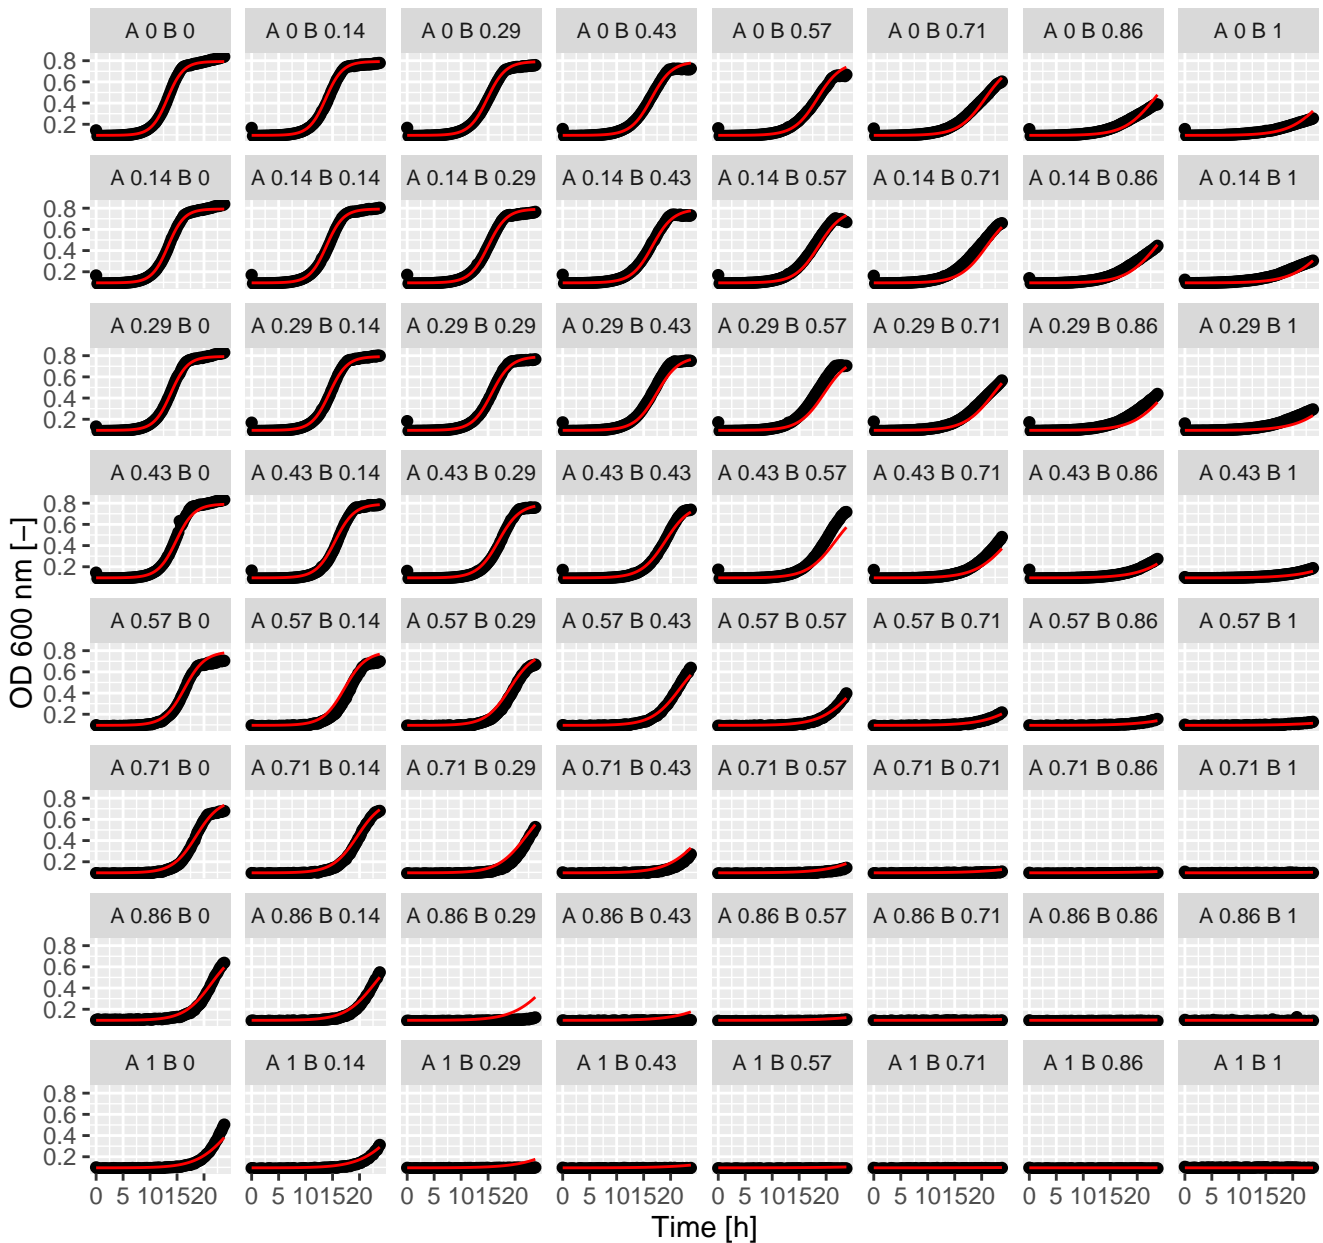

Ani.Sta (= Ax.Bx) Emp. Bliss  
beta = 1.47

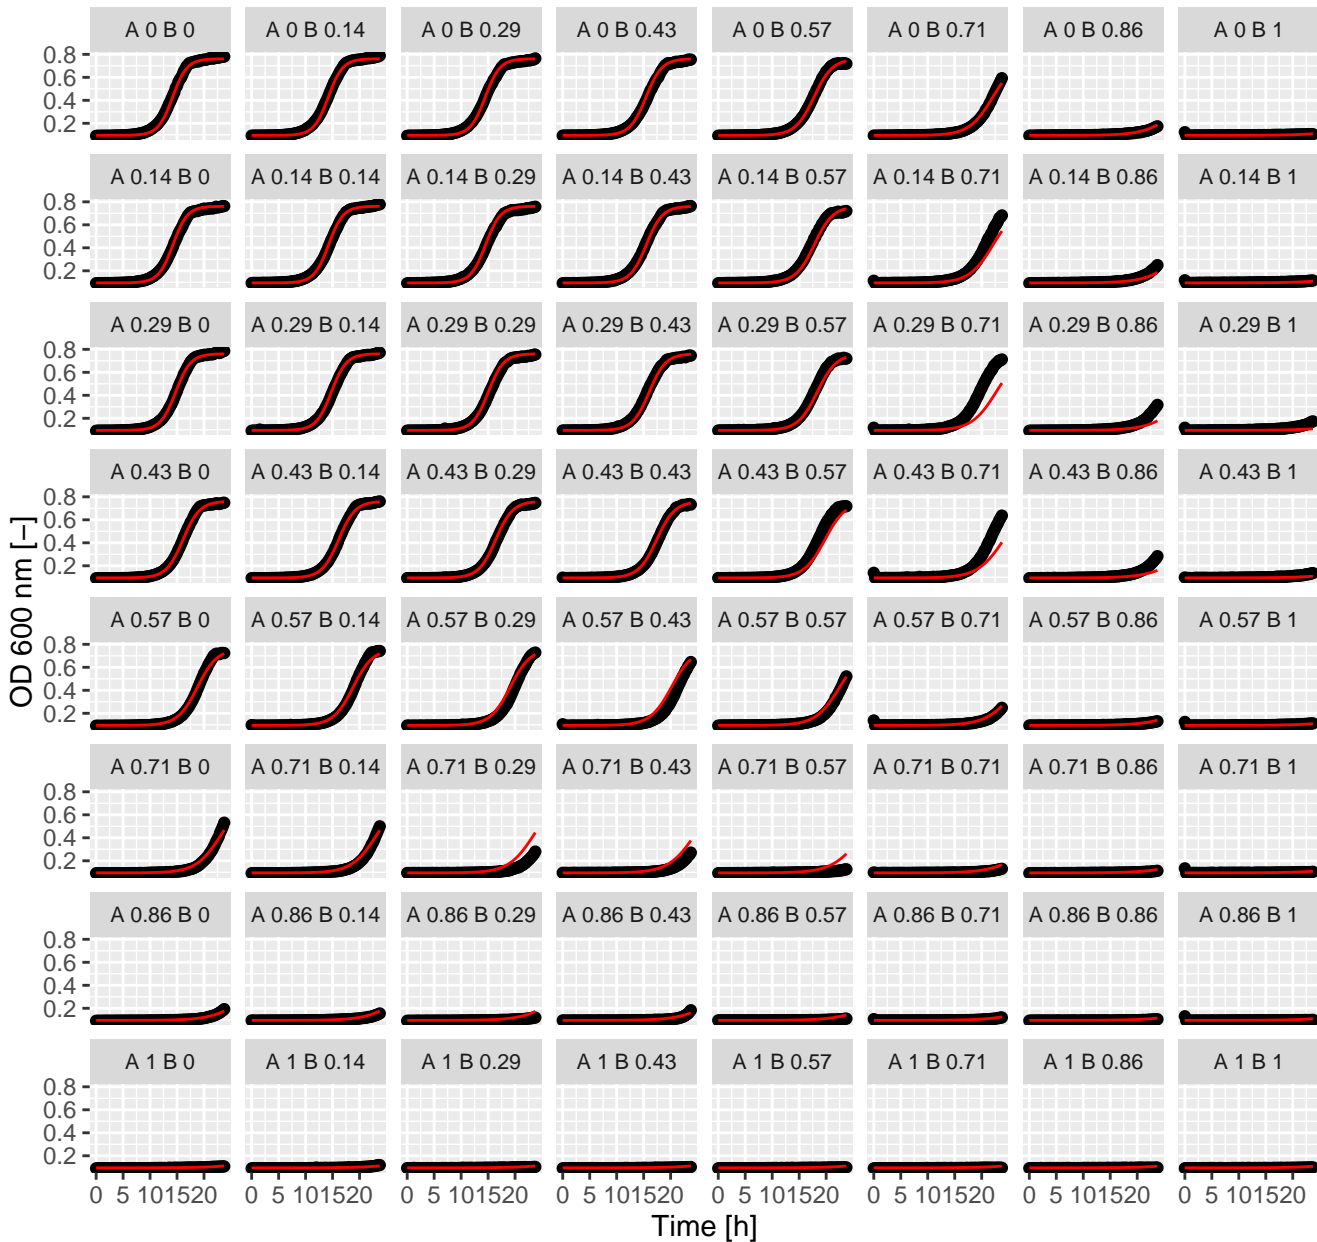

## Ani.Tac (= Ax.Bx) Emp. Bliss

beta = -117.95

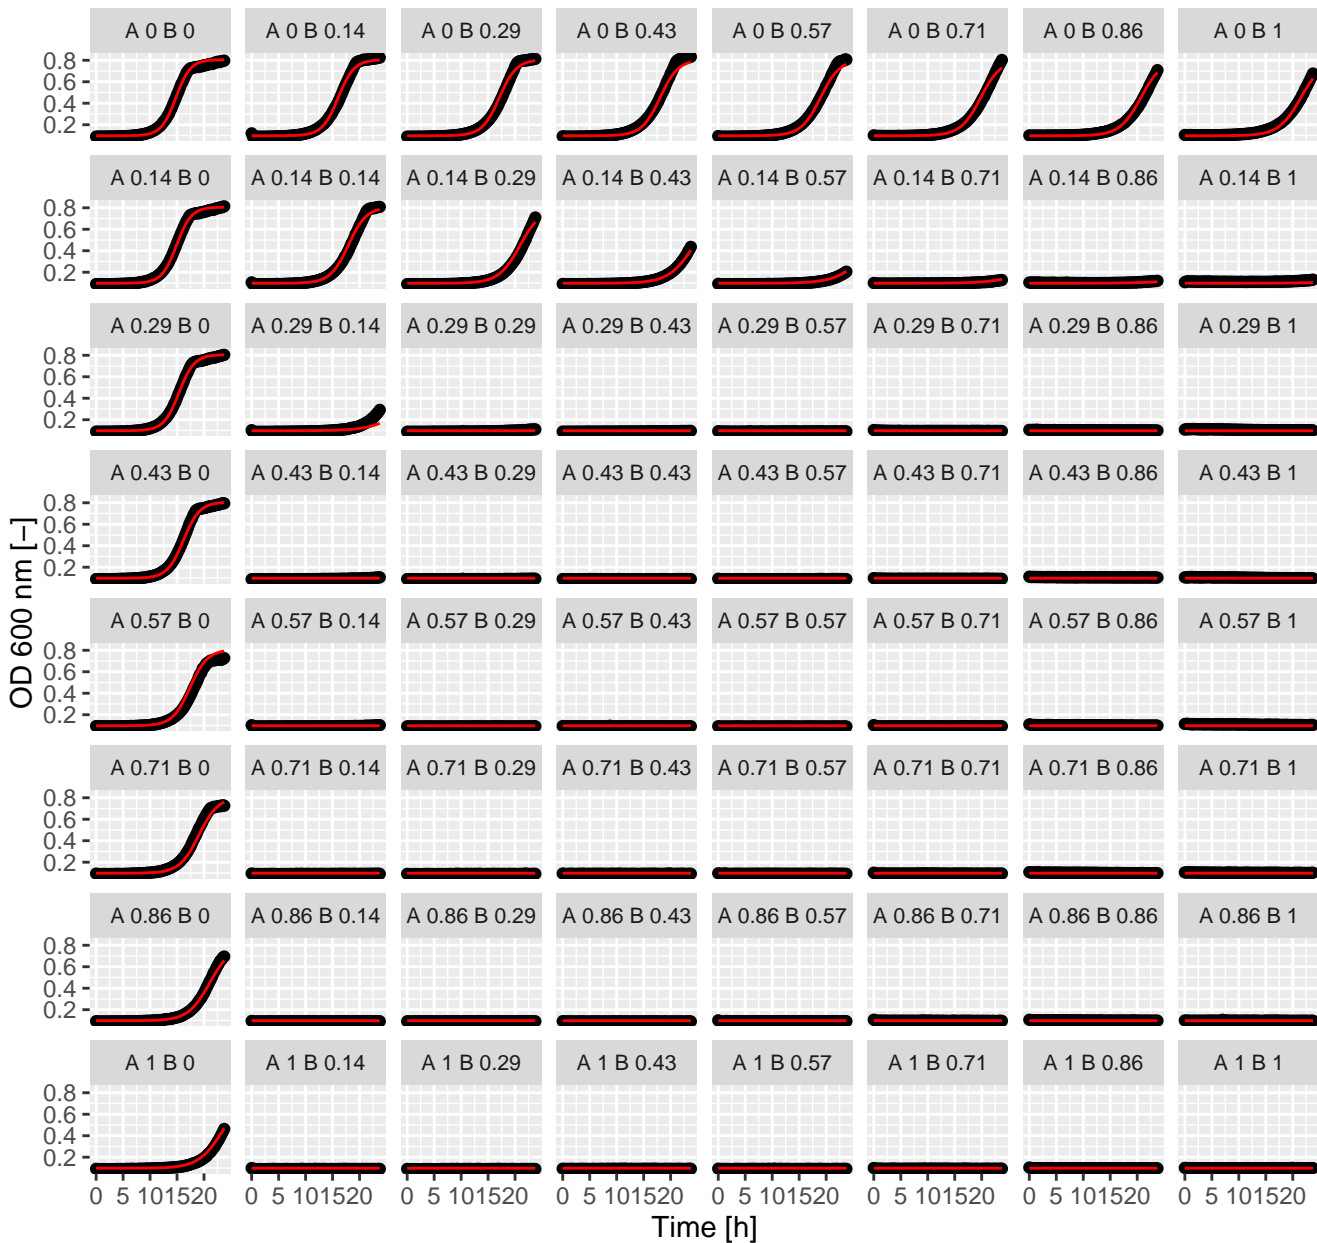

Ani.Ter (= Ax.Bx) Emp. Bliss  
beta = -1.04

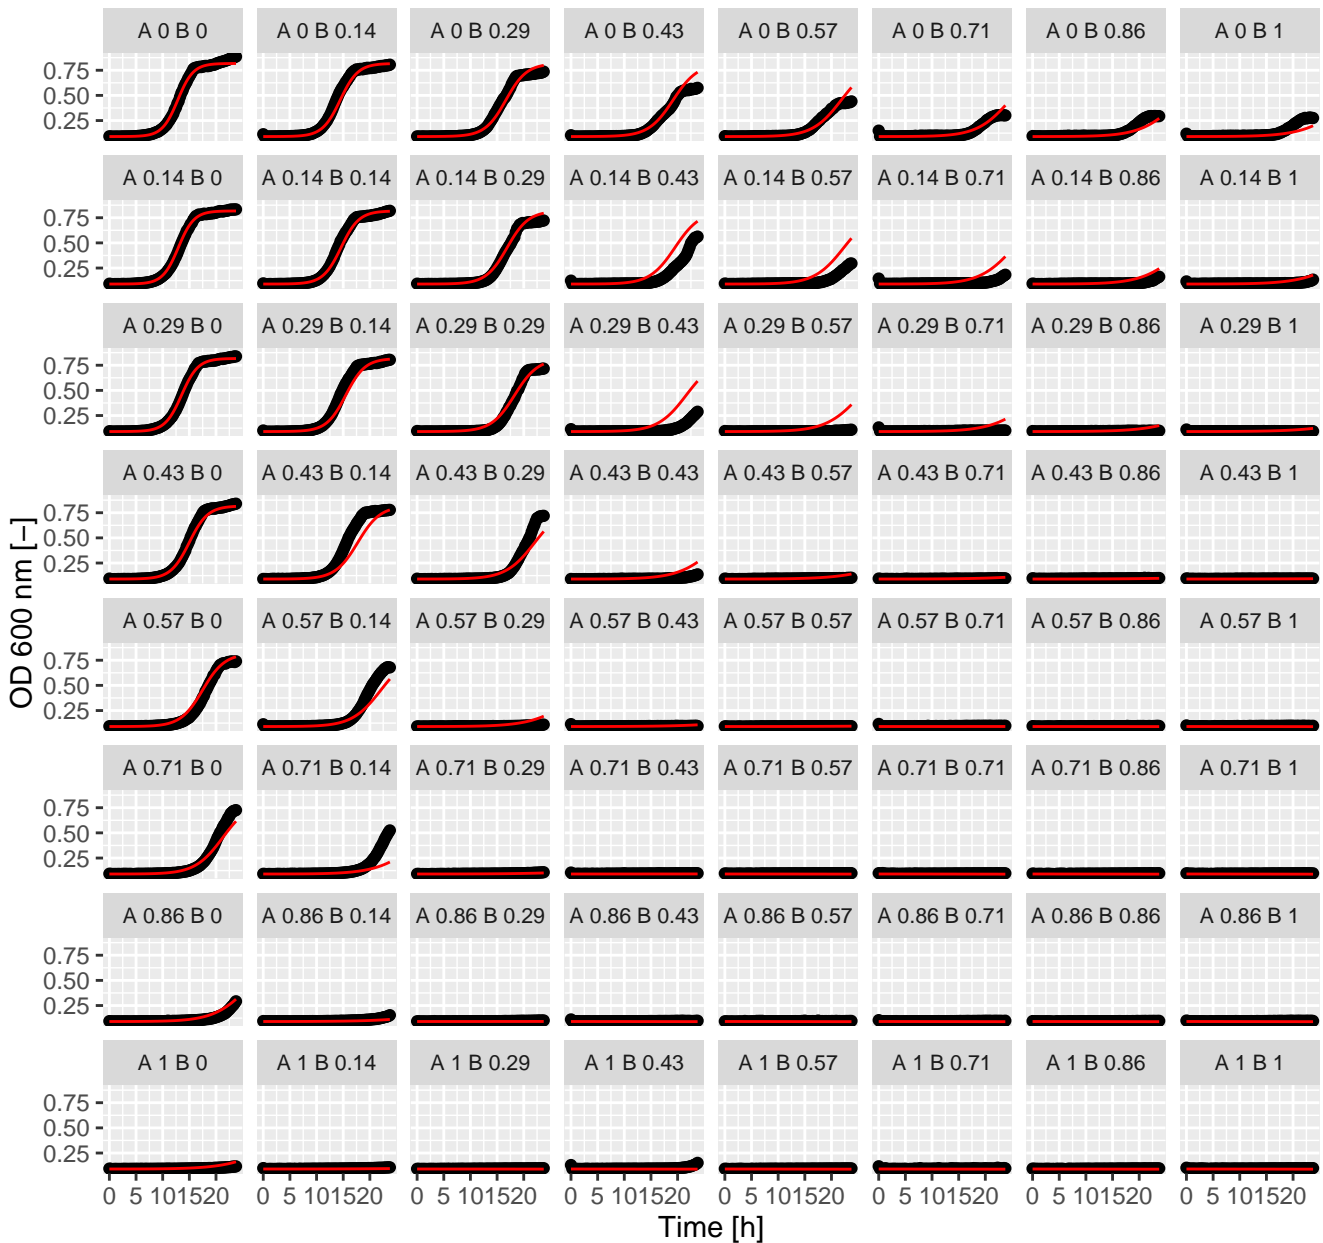

Ben.Ben (= Ax.Bx) Emp. Bliss  
beta = 0.51

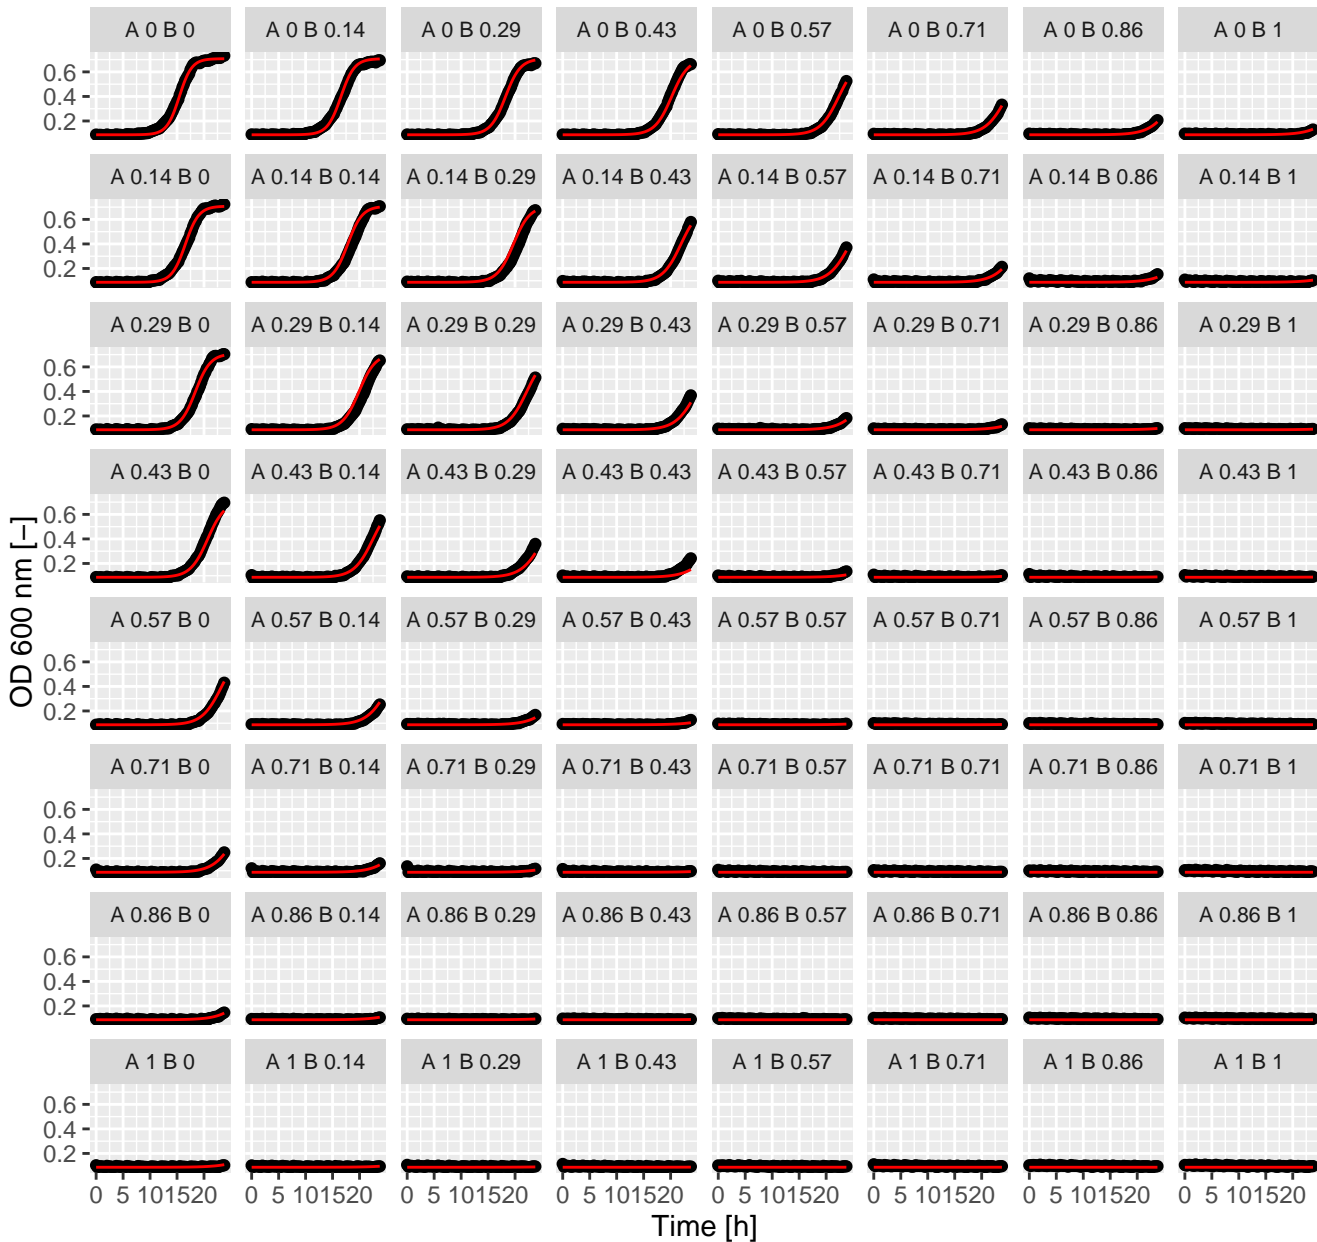

Ben.Bro (= Ax.Bx) Emp. Bliss  
beta = 0.15

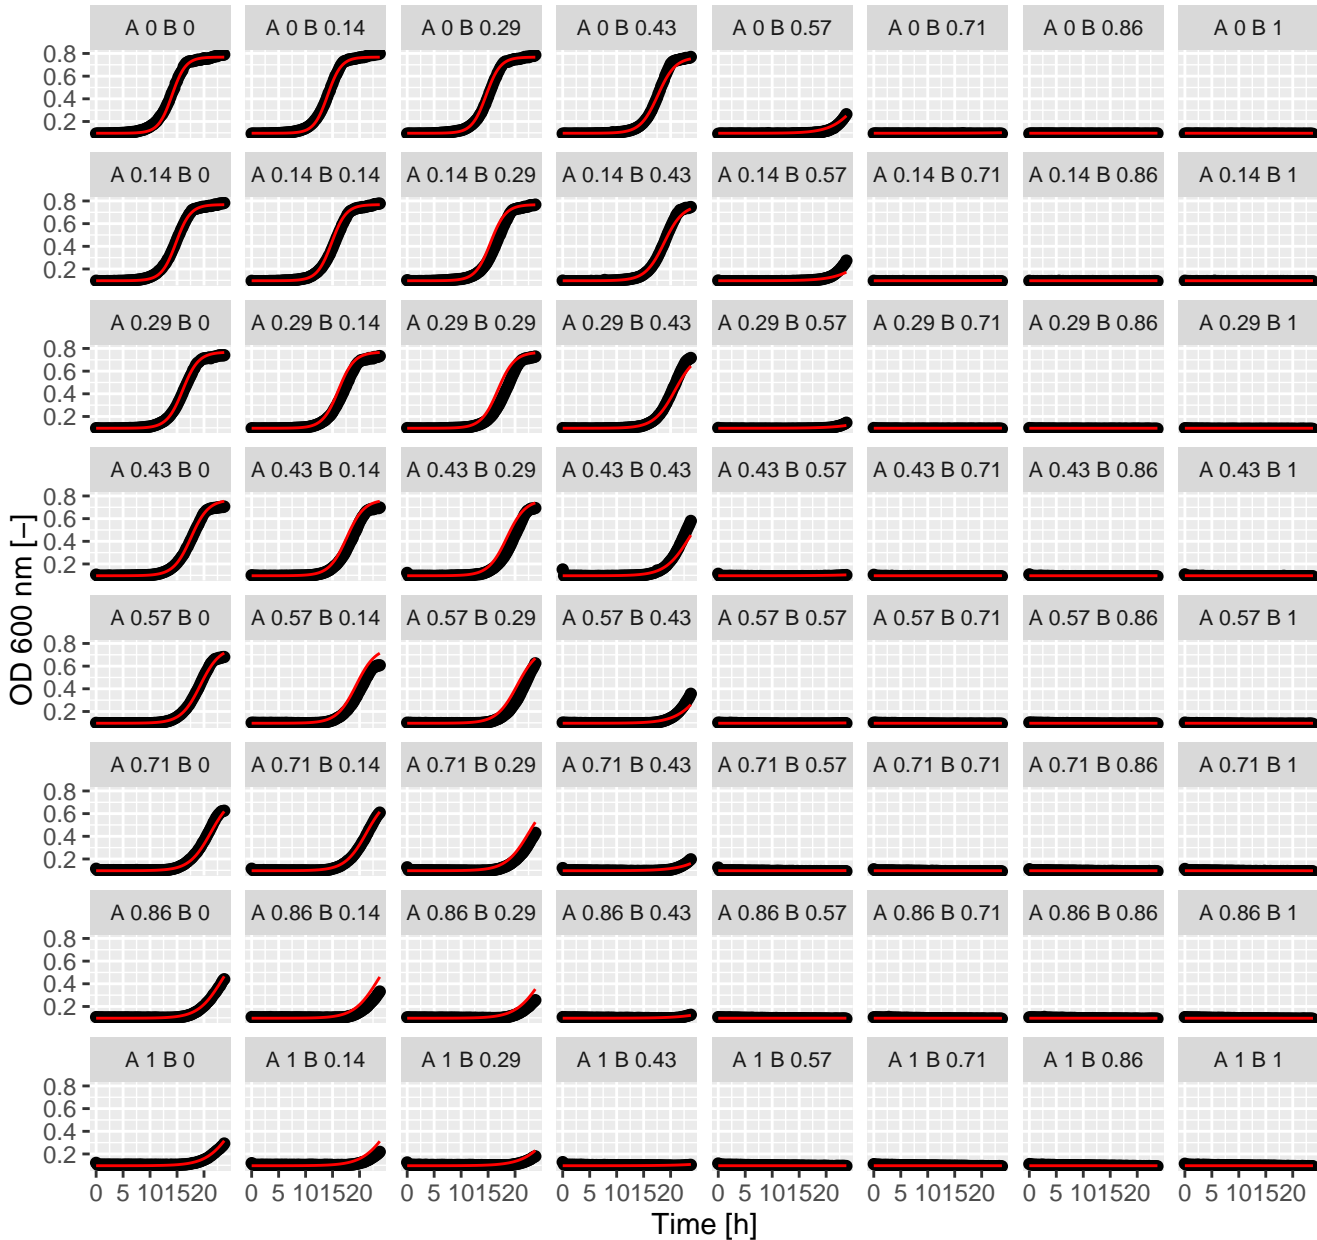



Ben.C3P (= Ax.Bx) Emp. Bliss  
beta = 1.02

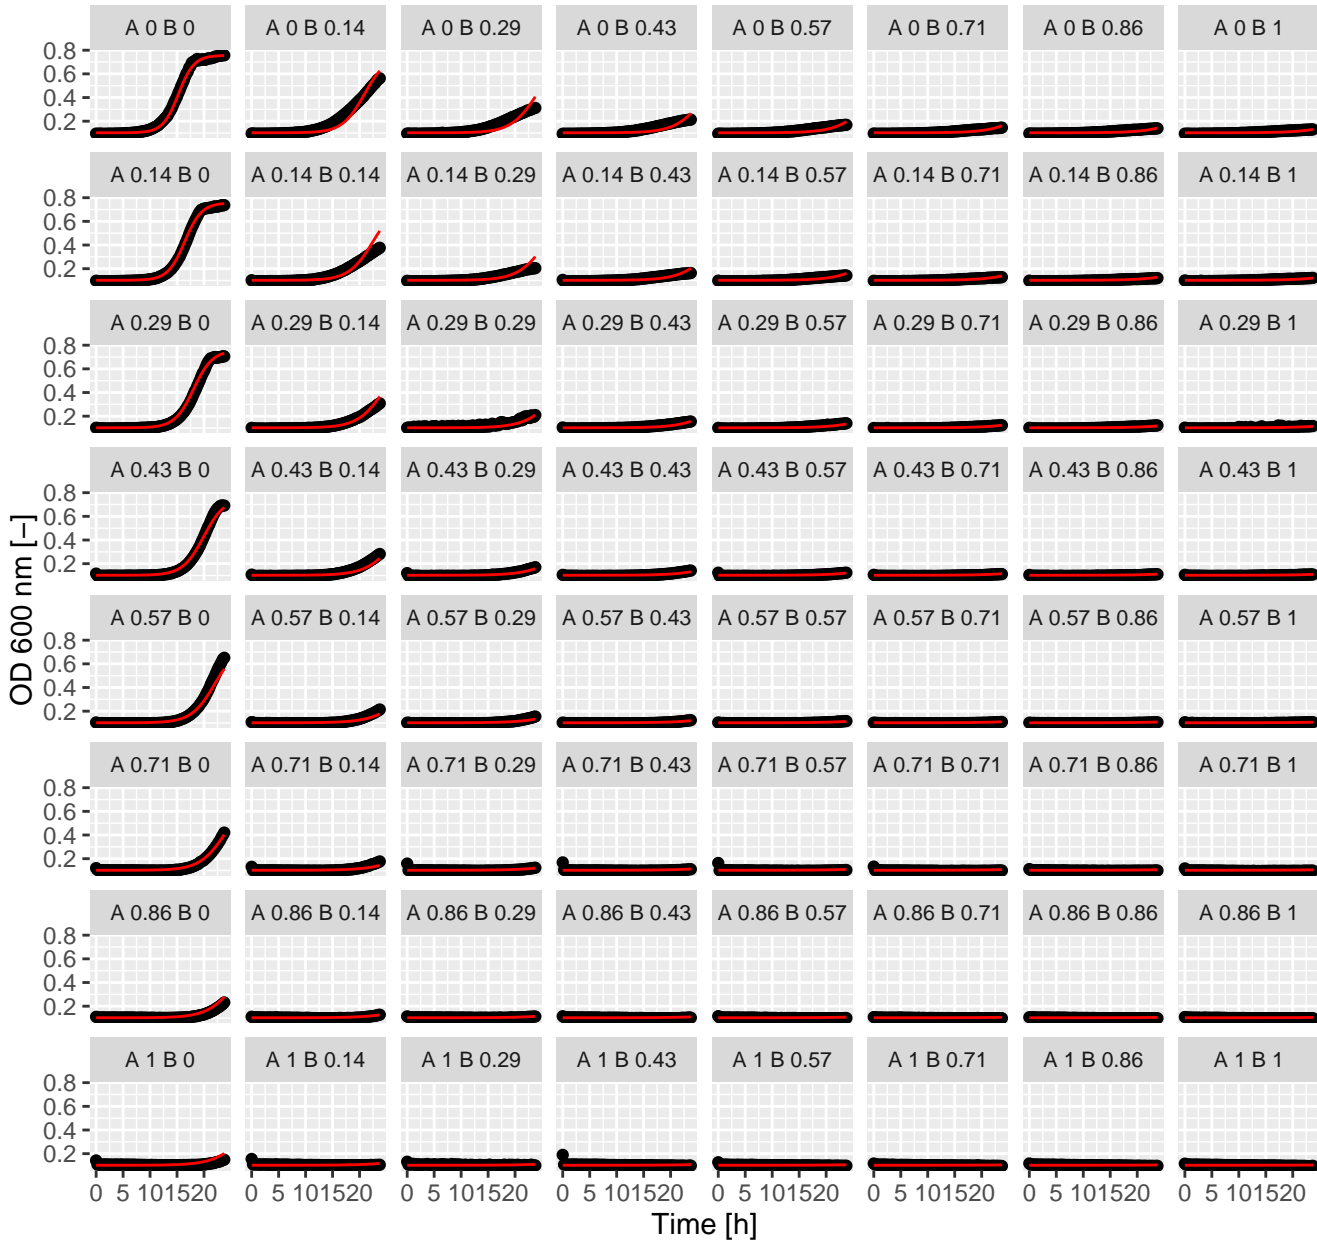

Ben.Cal (= Ax.Bx) Emp. Bliss  
beta = 1.1

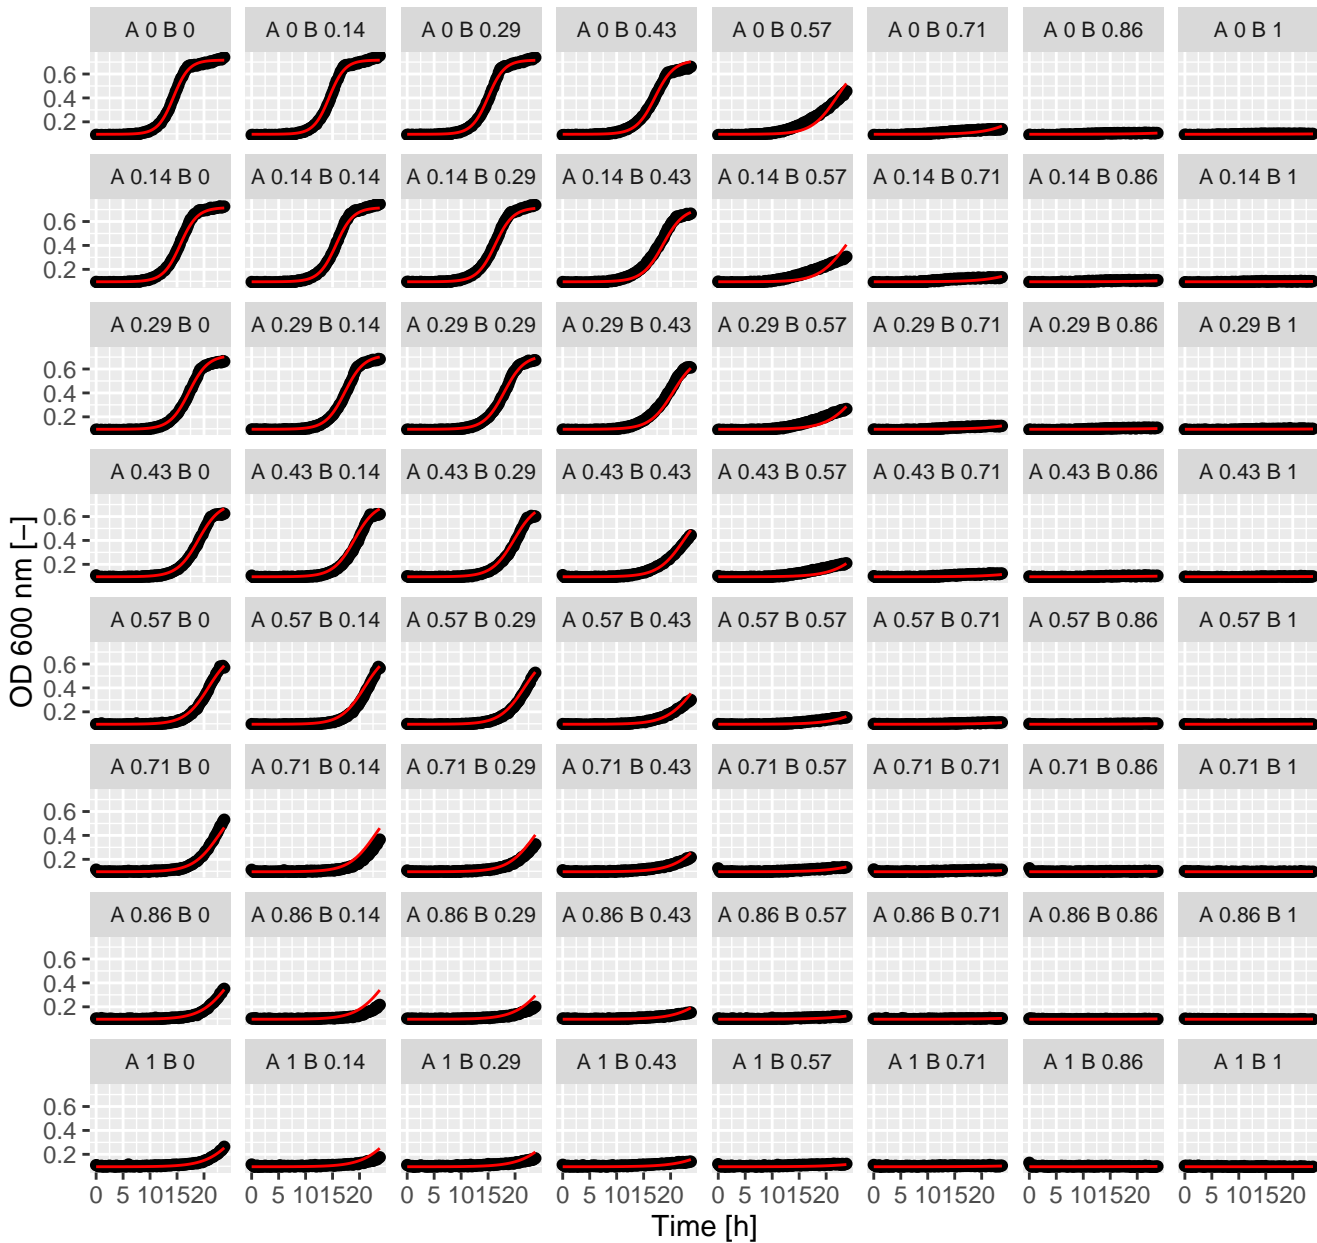

Ben.Chl (= Ax.Bx) Emp. Bliss  
beta = 0.47

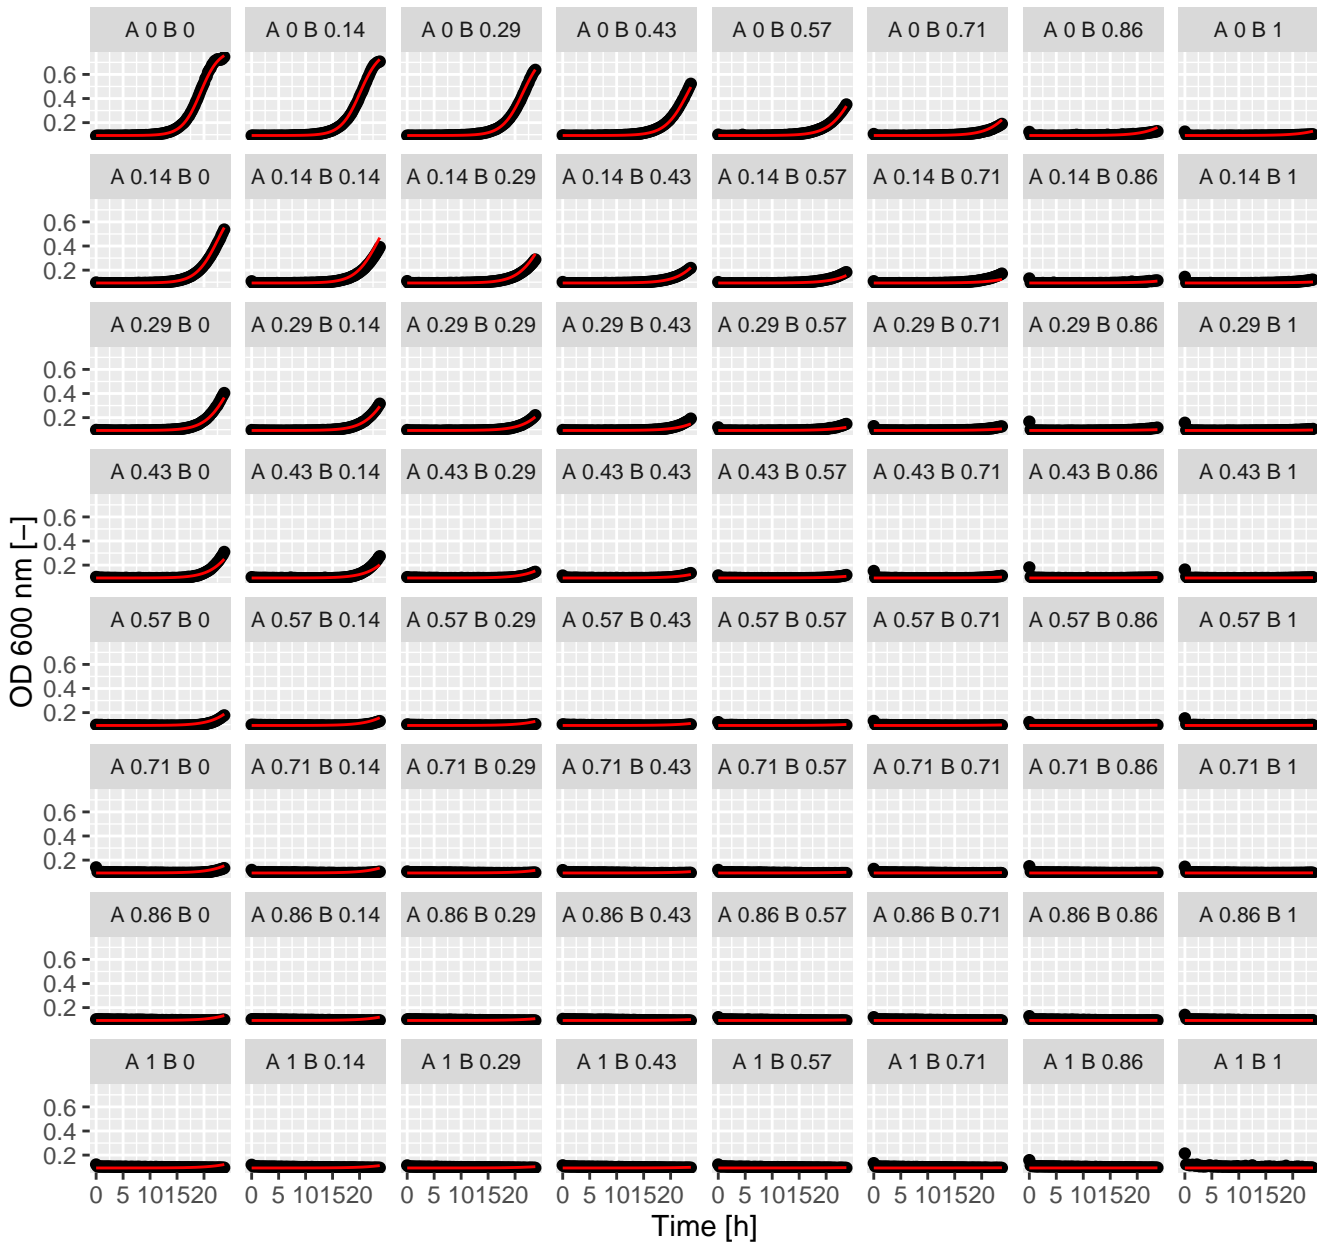

Ben.Cis (= Ax.Bx) Emp. Bliss  
beta = 1.31

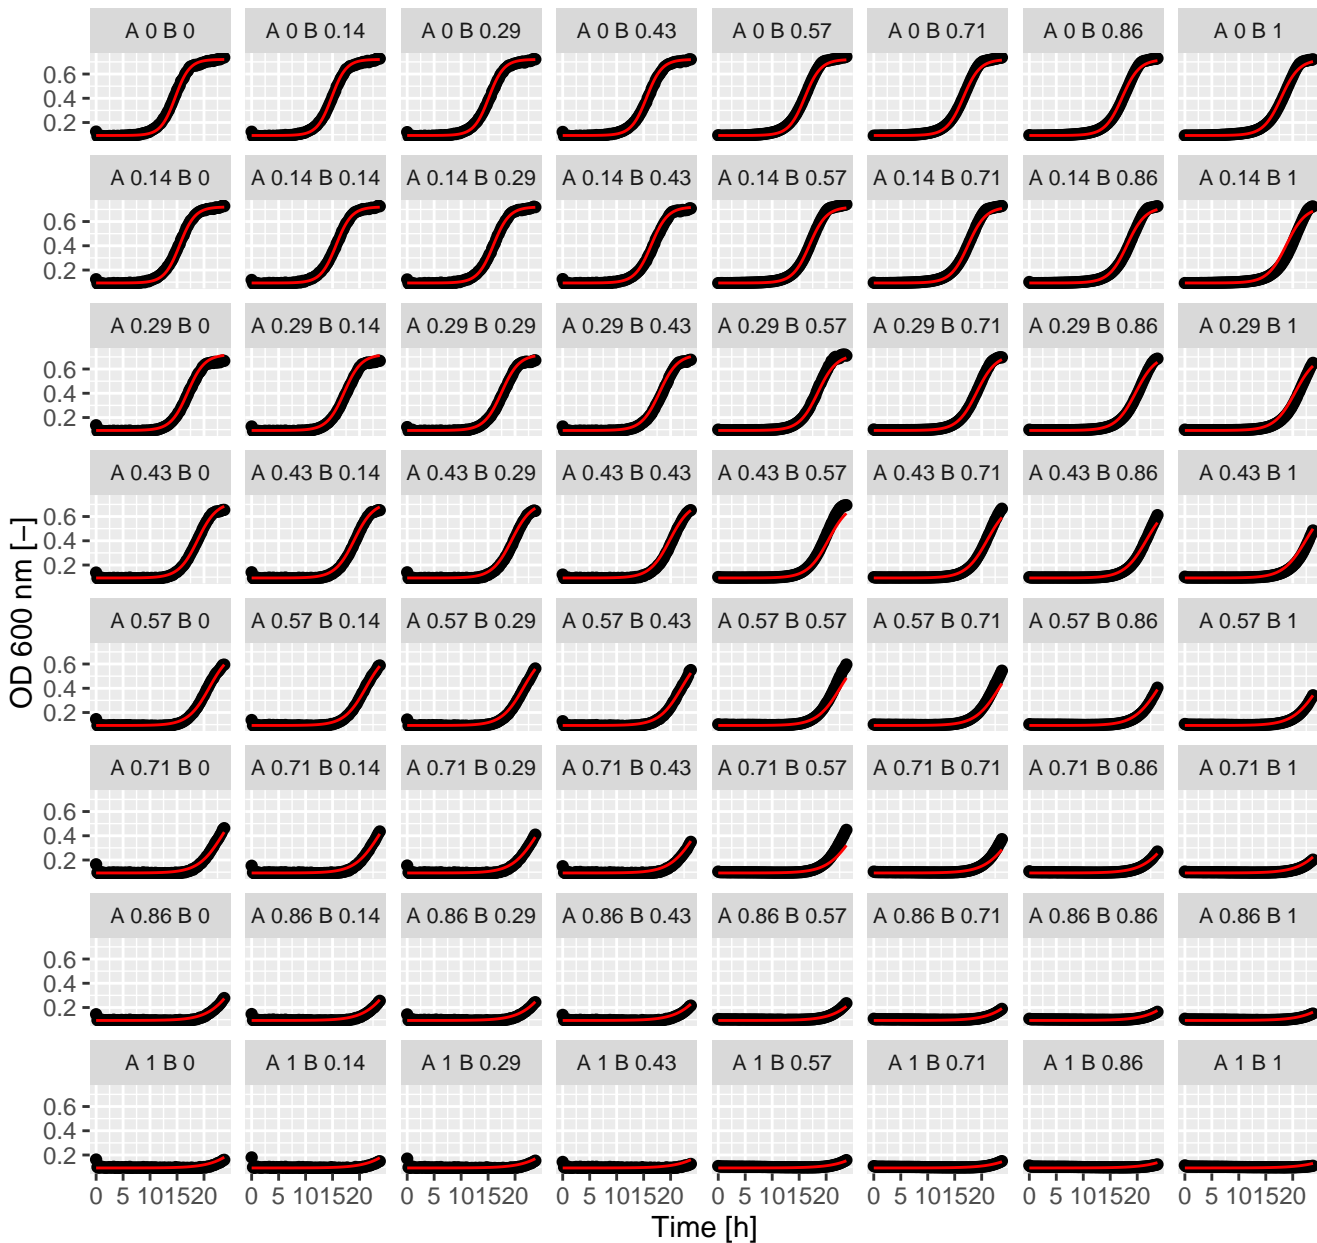

Ben.Cyc (= Ax.Bx) Emp. Bliss  
beta = 1.69

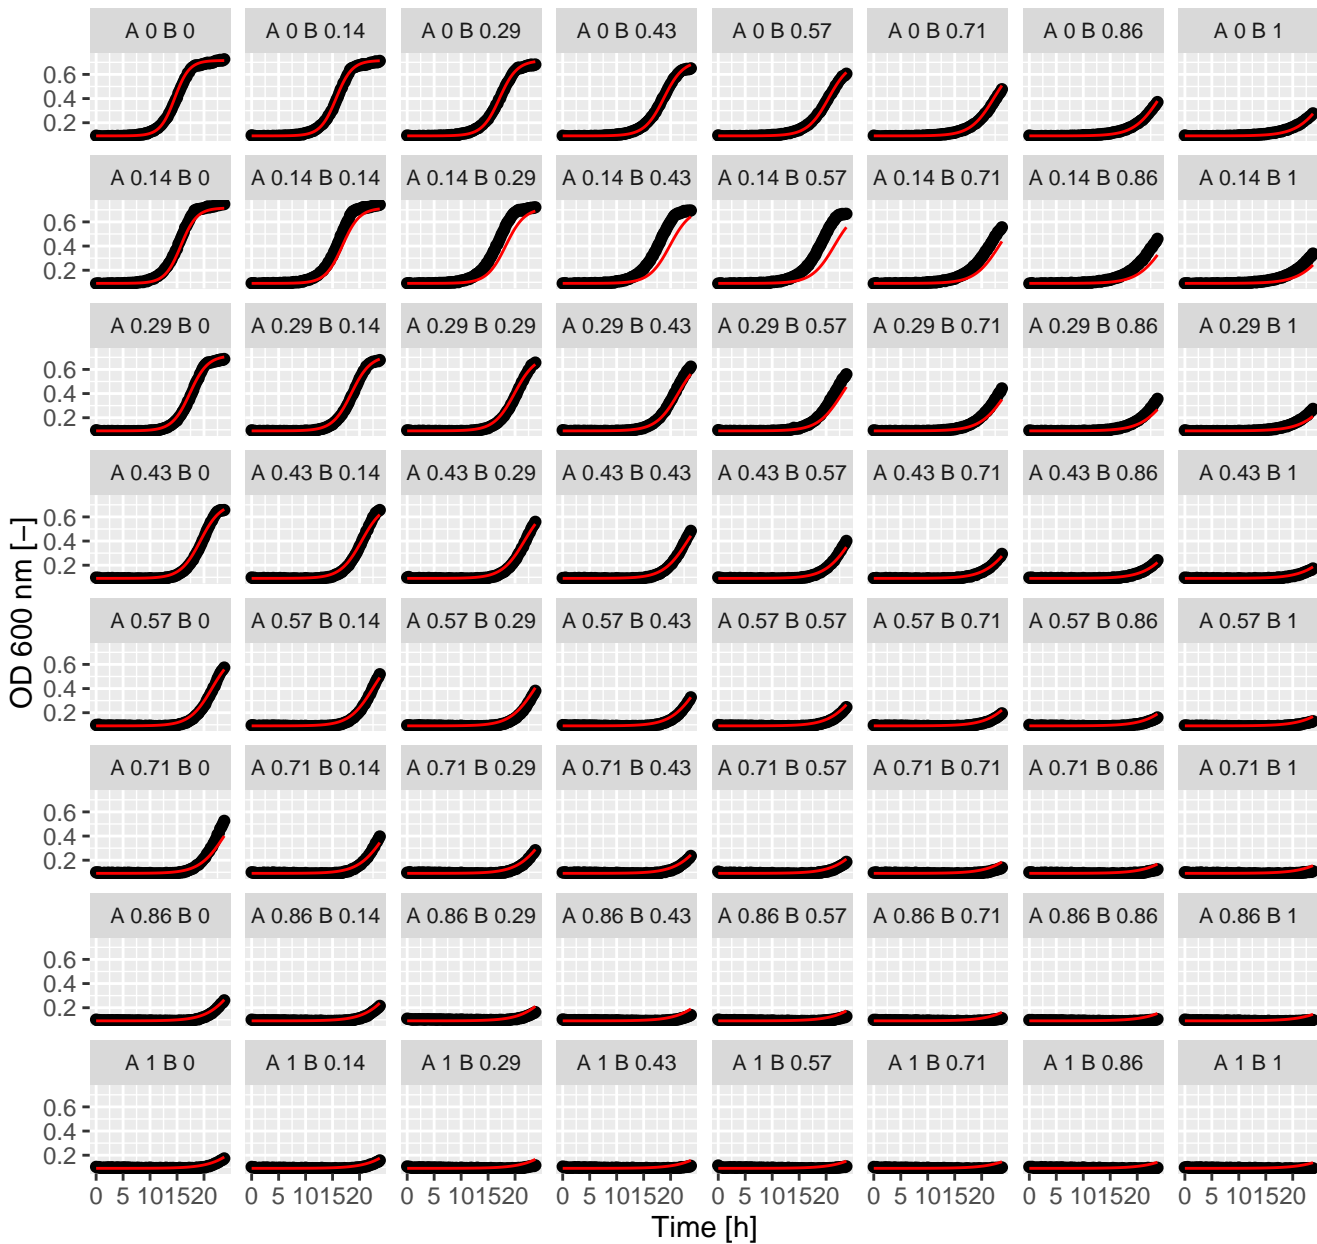

Ben.Dyc (= Ax.Bx) Emp. Bliss  
beta = 0.09

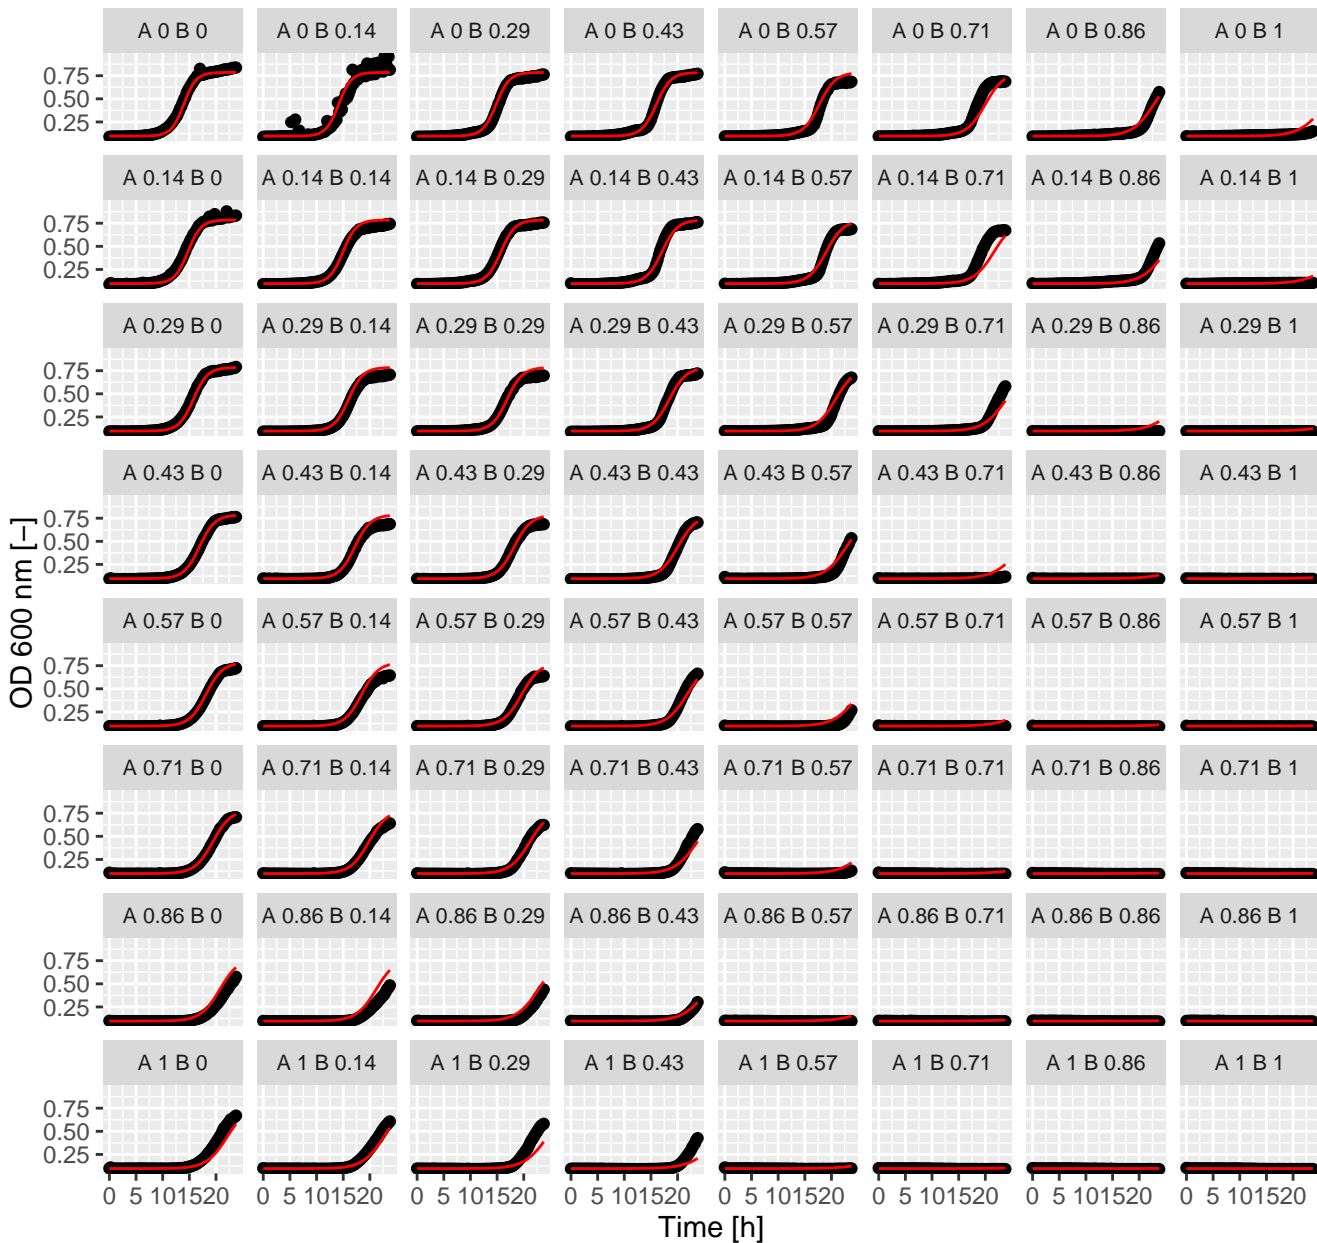

Ben.Fen (= Ax.Bx) Emp. Bliss  
beta = 1.47

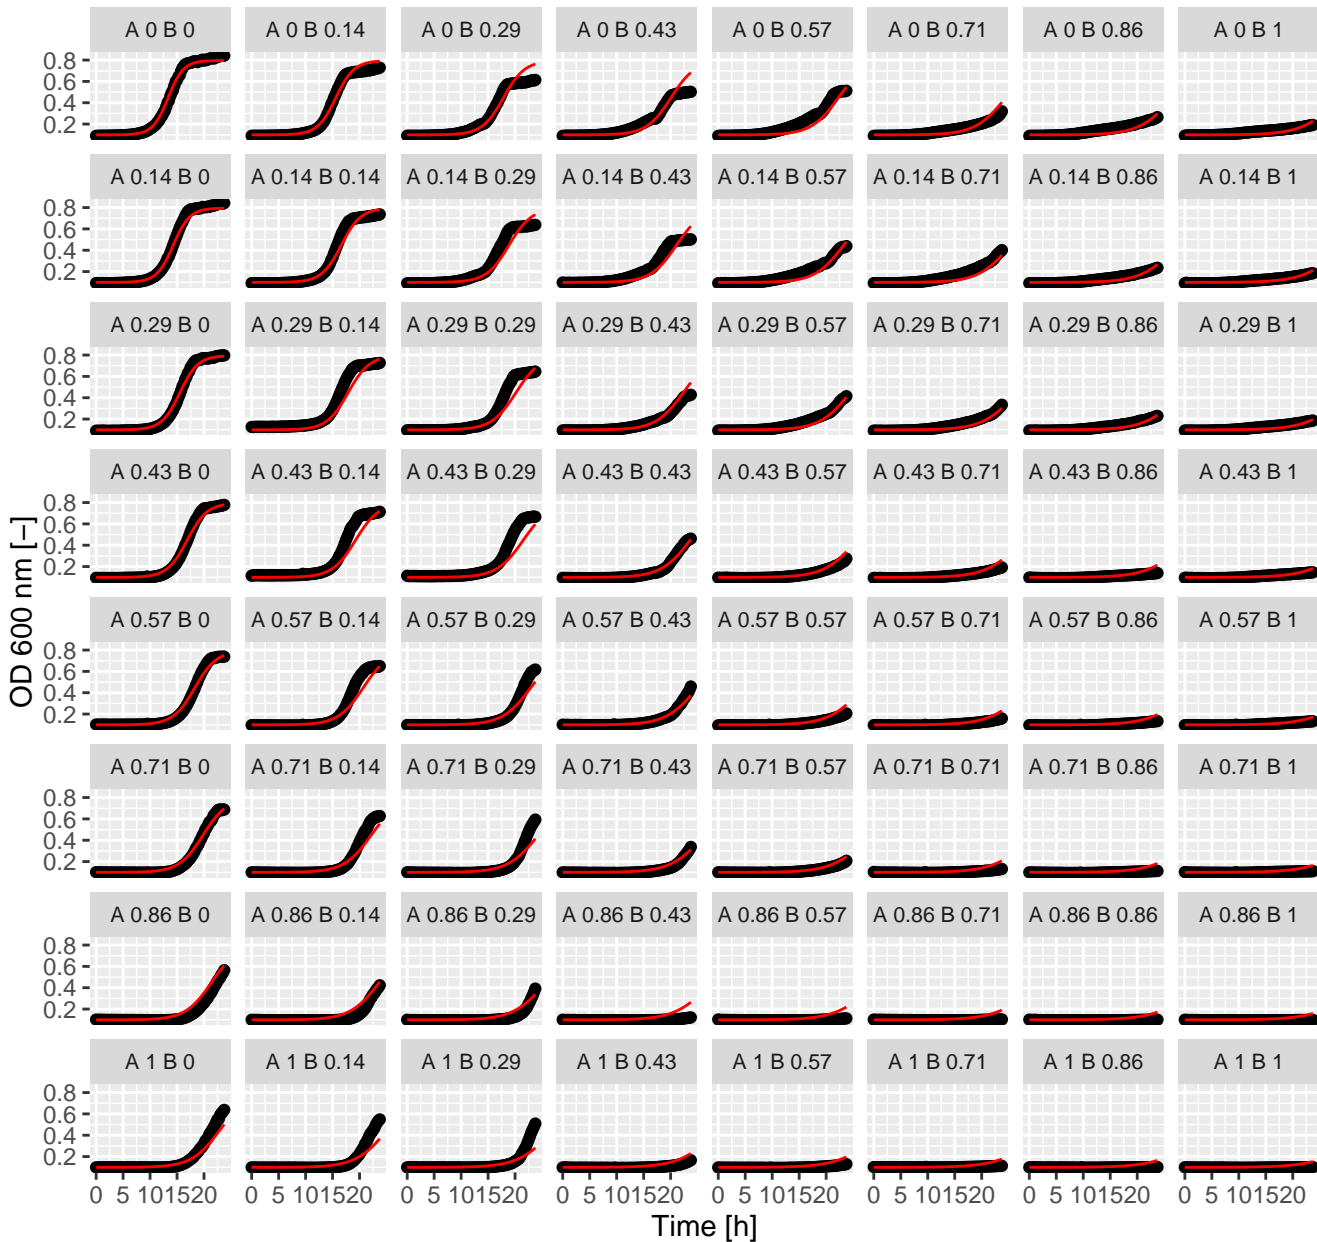

Ben.Hal (= Ax.Bx) Emp. Bliss  
beta = 1.33

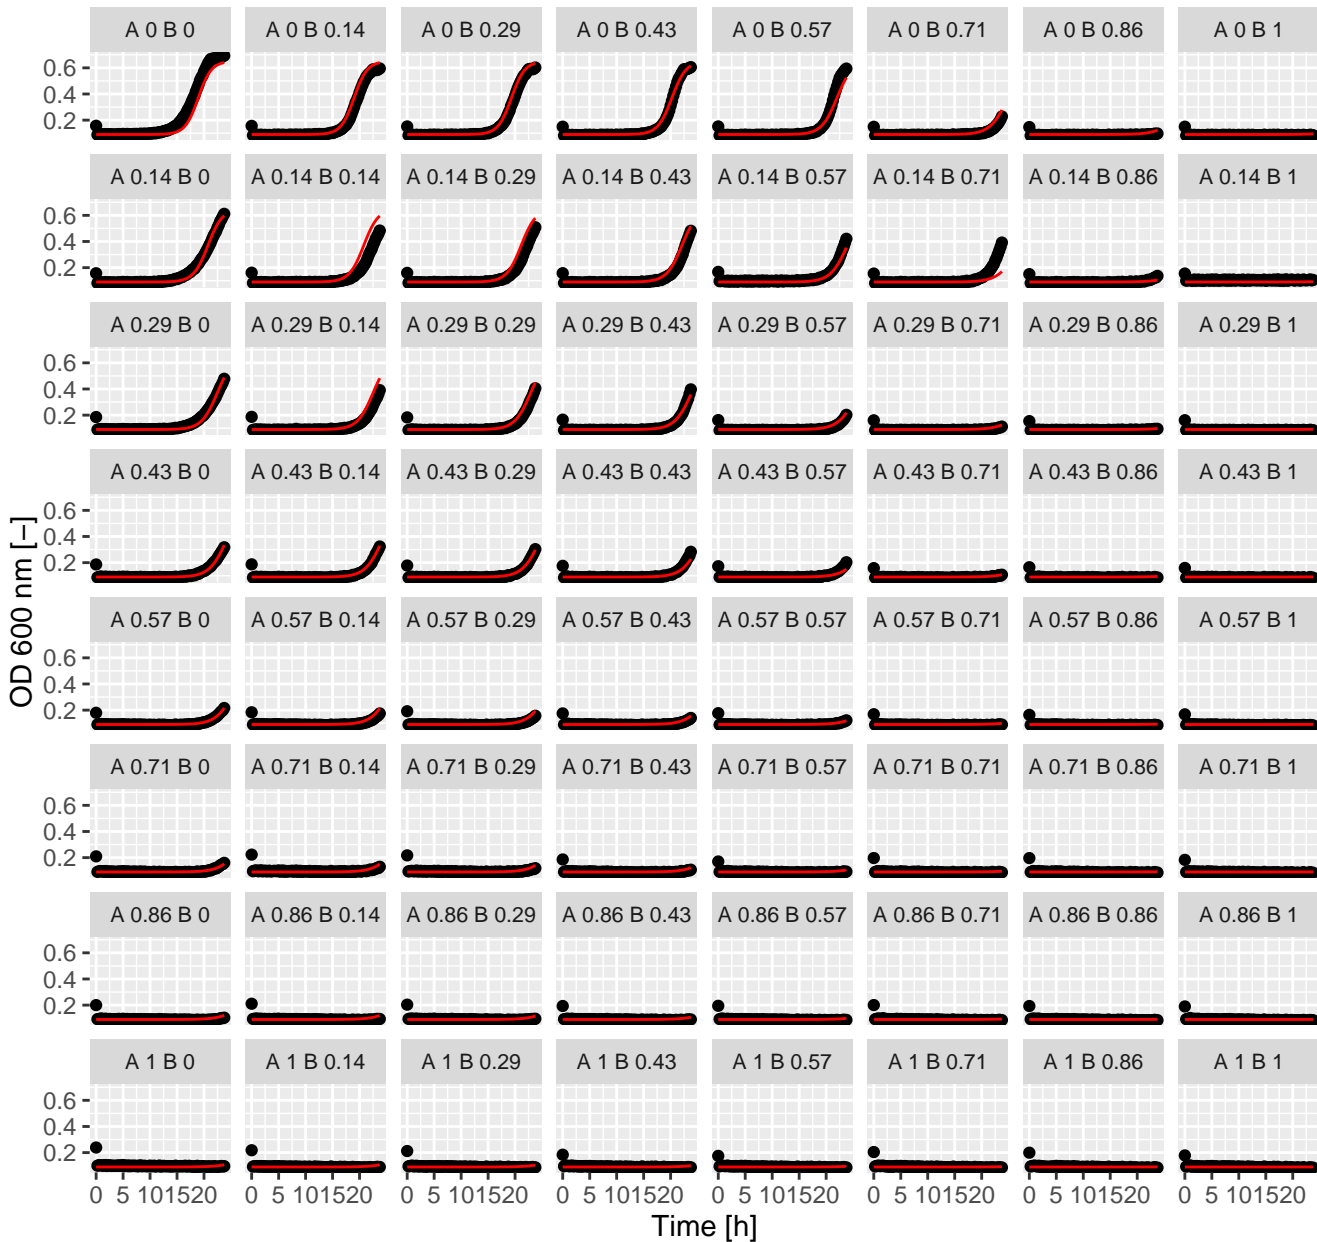



Ben.Lat (= Ax.Bx) Emp. Bliss  
beta = 2.21

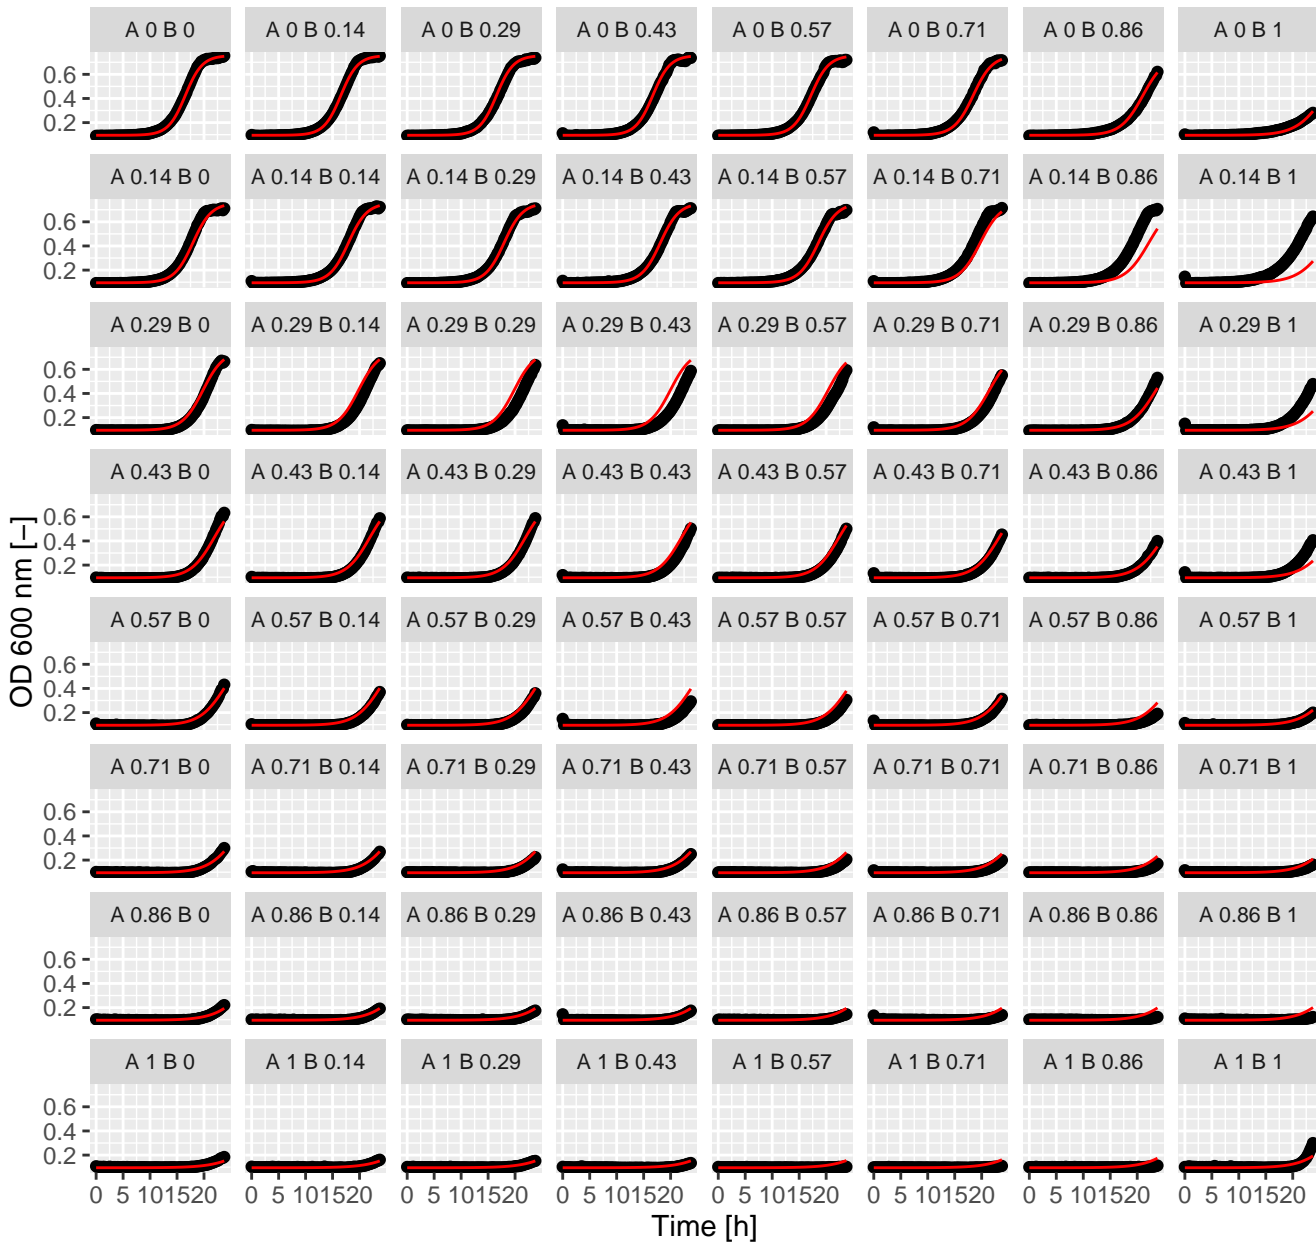

Ben.Met (= Ax.Bx) Emp. Bliss  
beta = 1.16

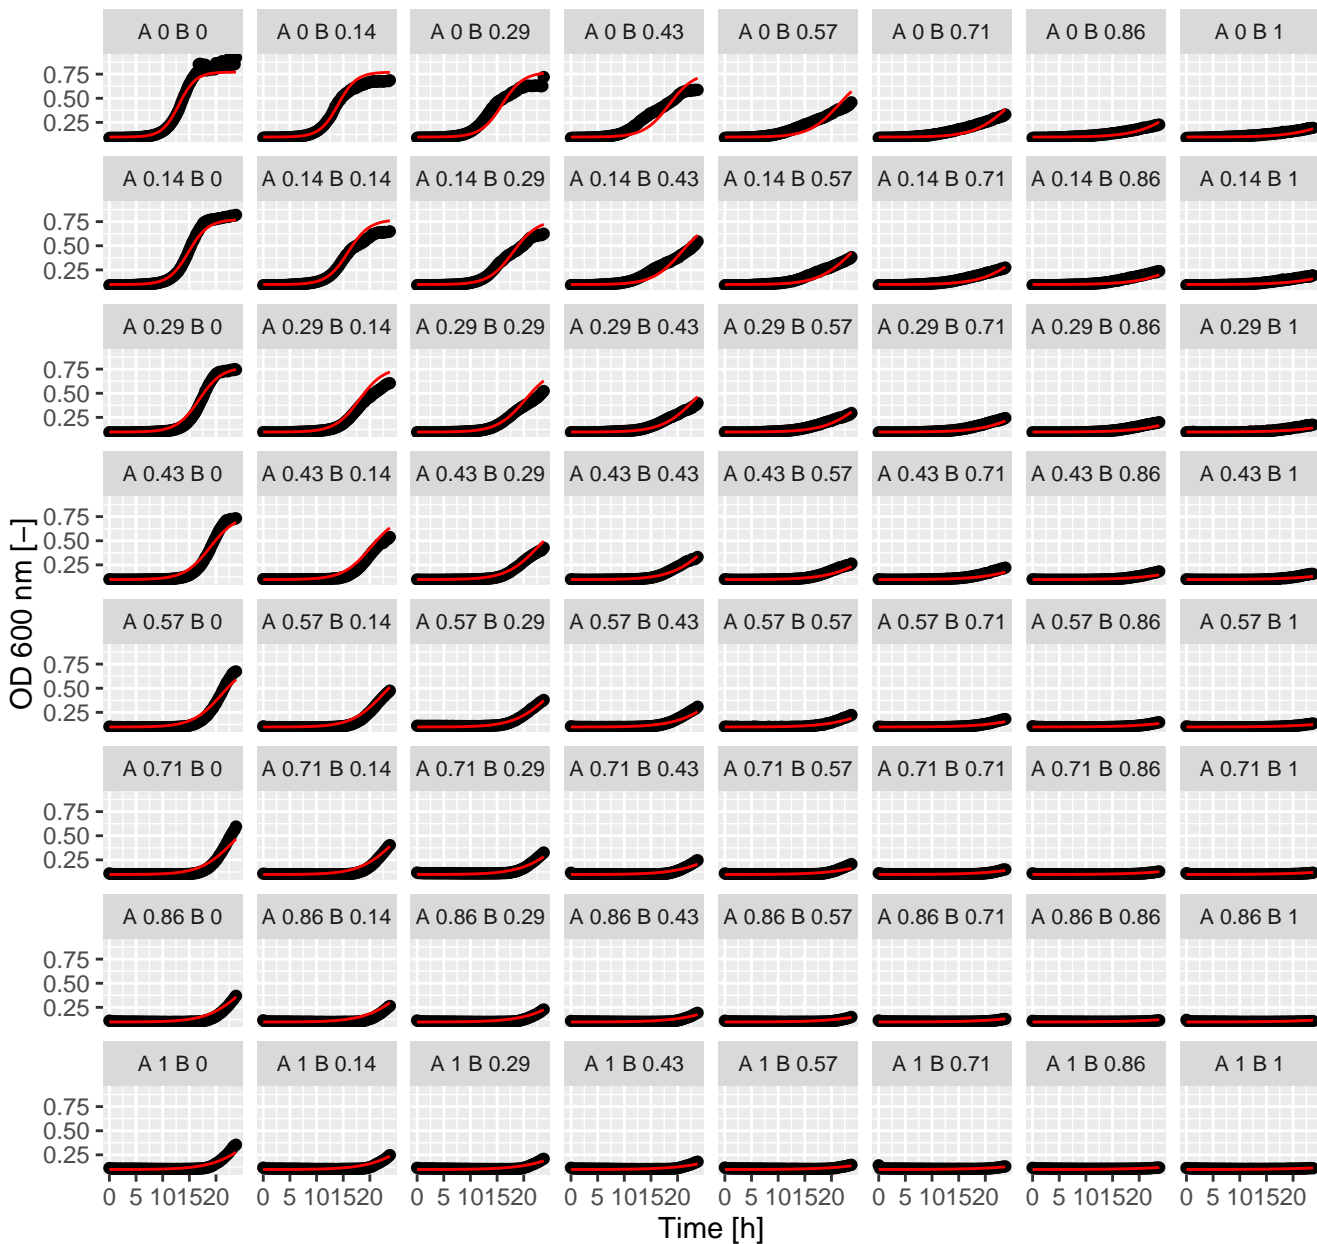

Ben.MMS (= Ax.Bx) Emp. Bliss  
beta = 1.45

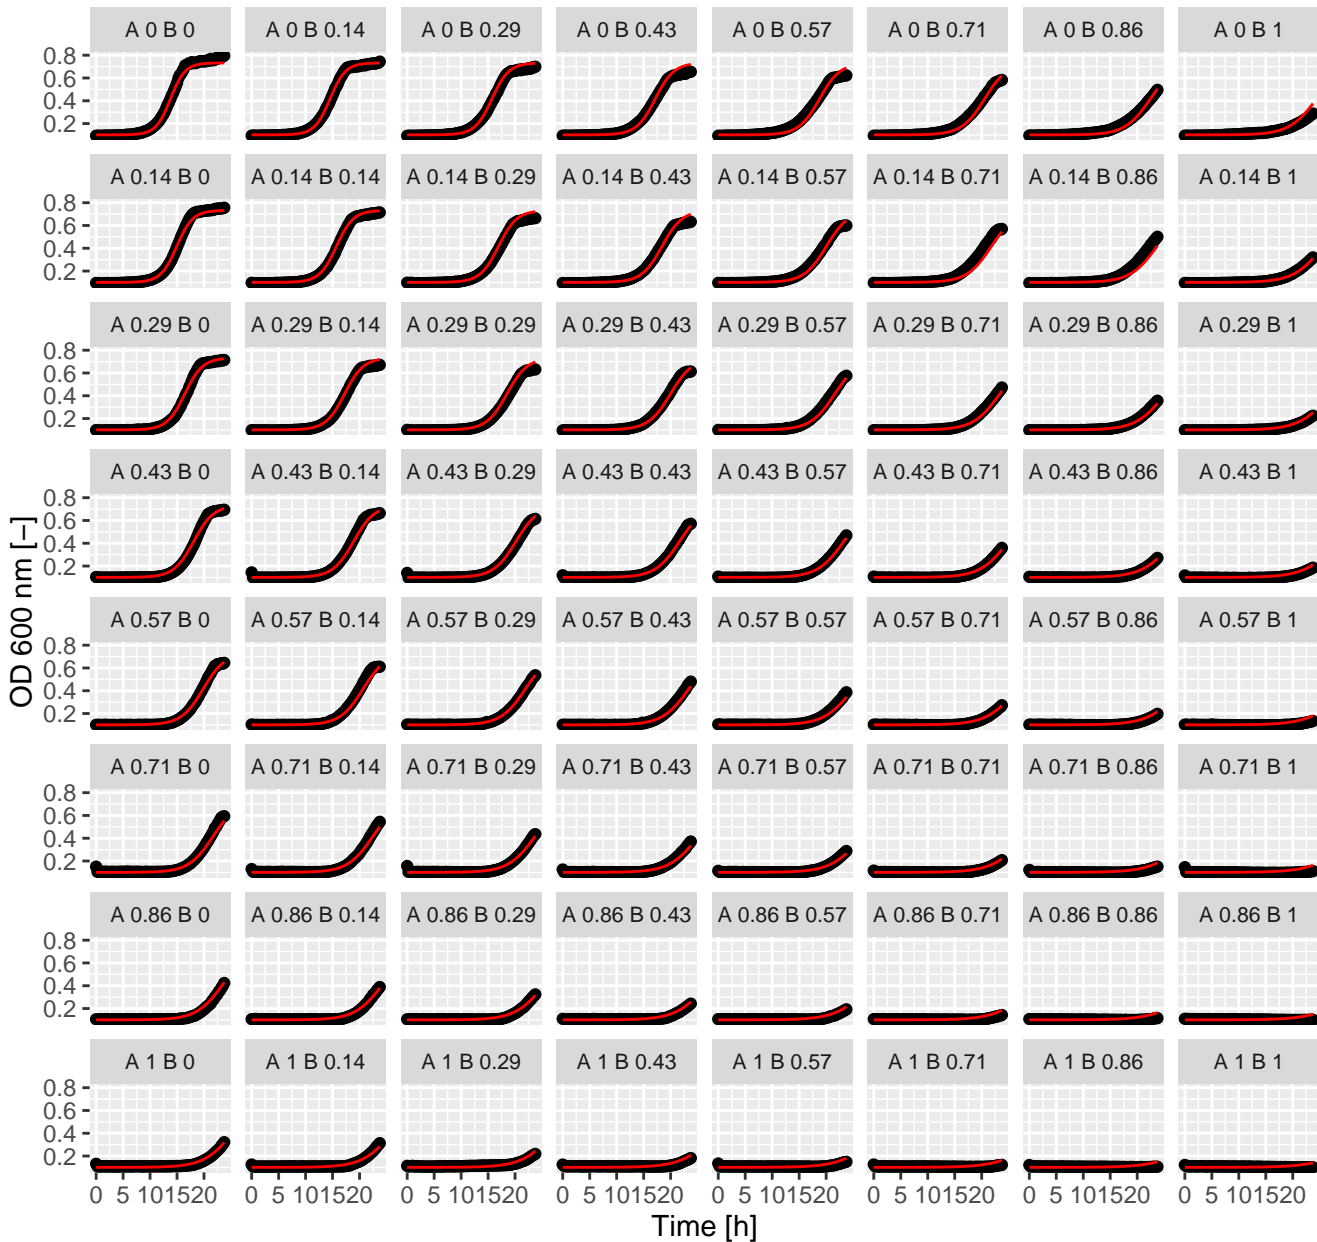

Ben.Myr (= Ax.Bx) Emp. Bliss  
beta = -1.04

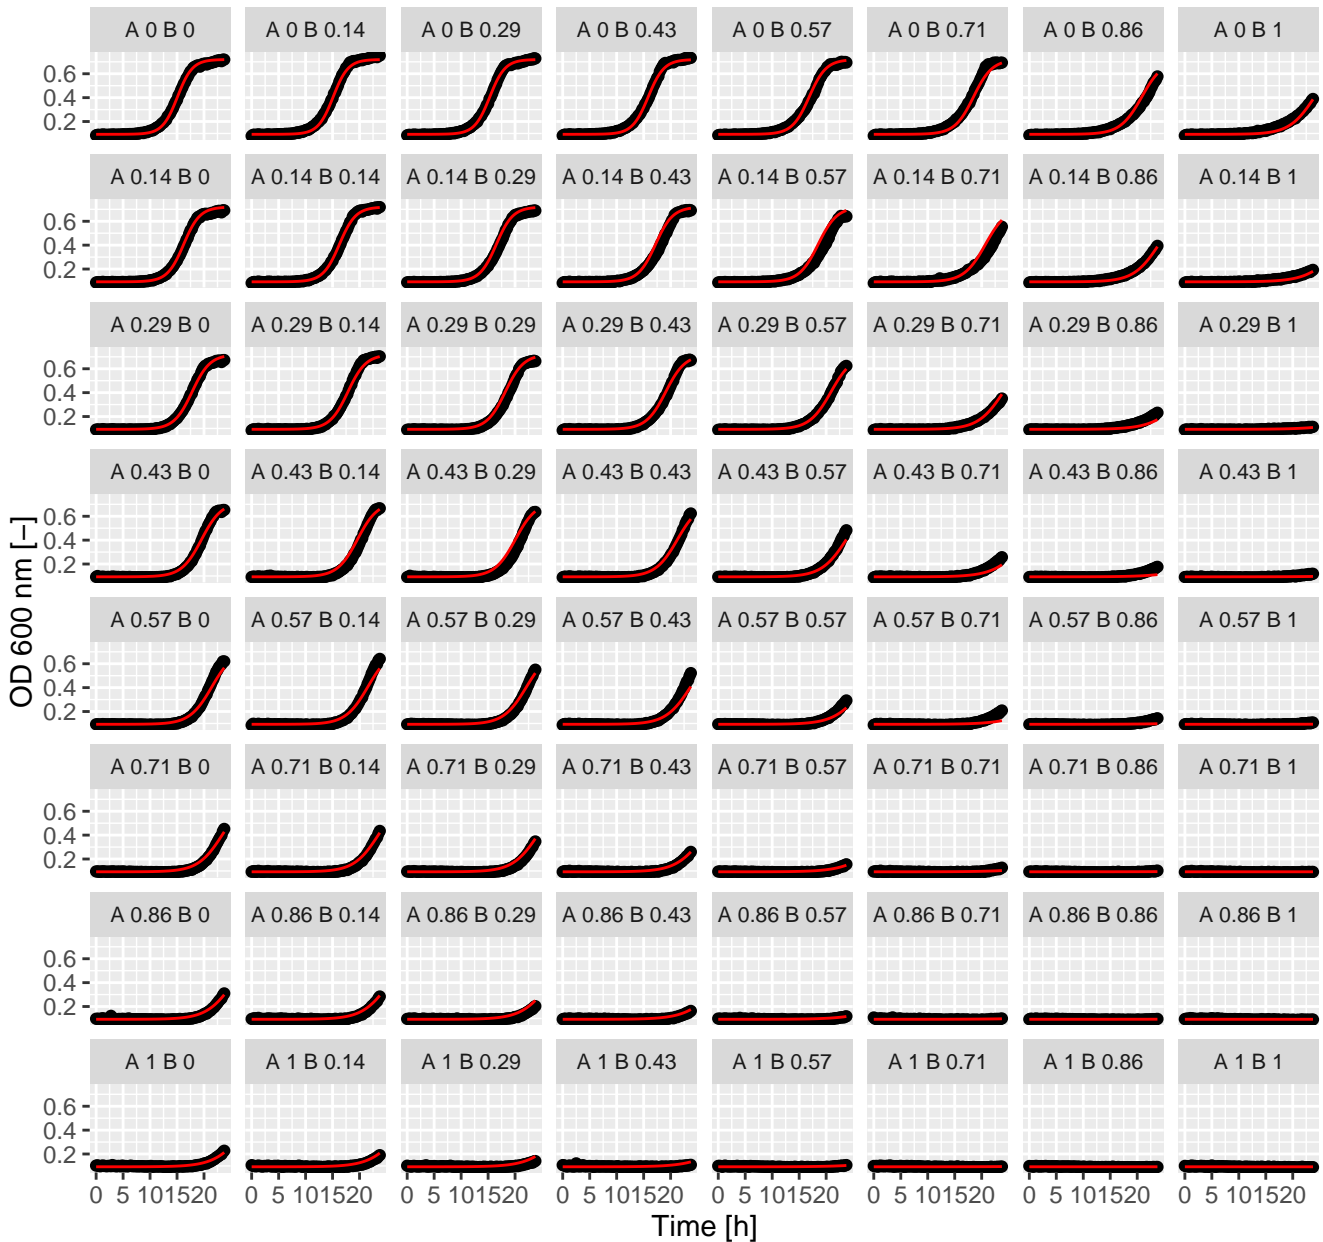

Ben.Pen (= Ax.Bx) Emp. Bliss  
beta = -9.45

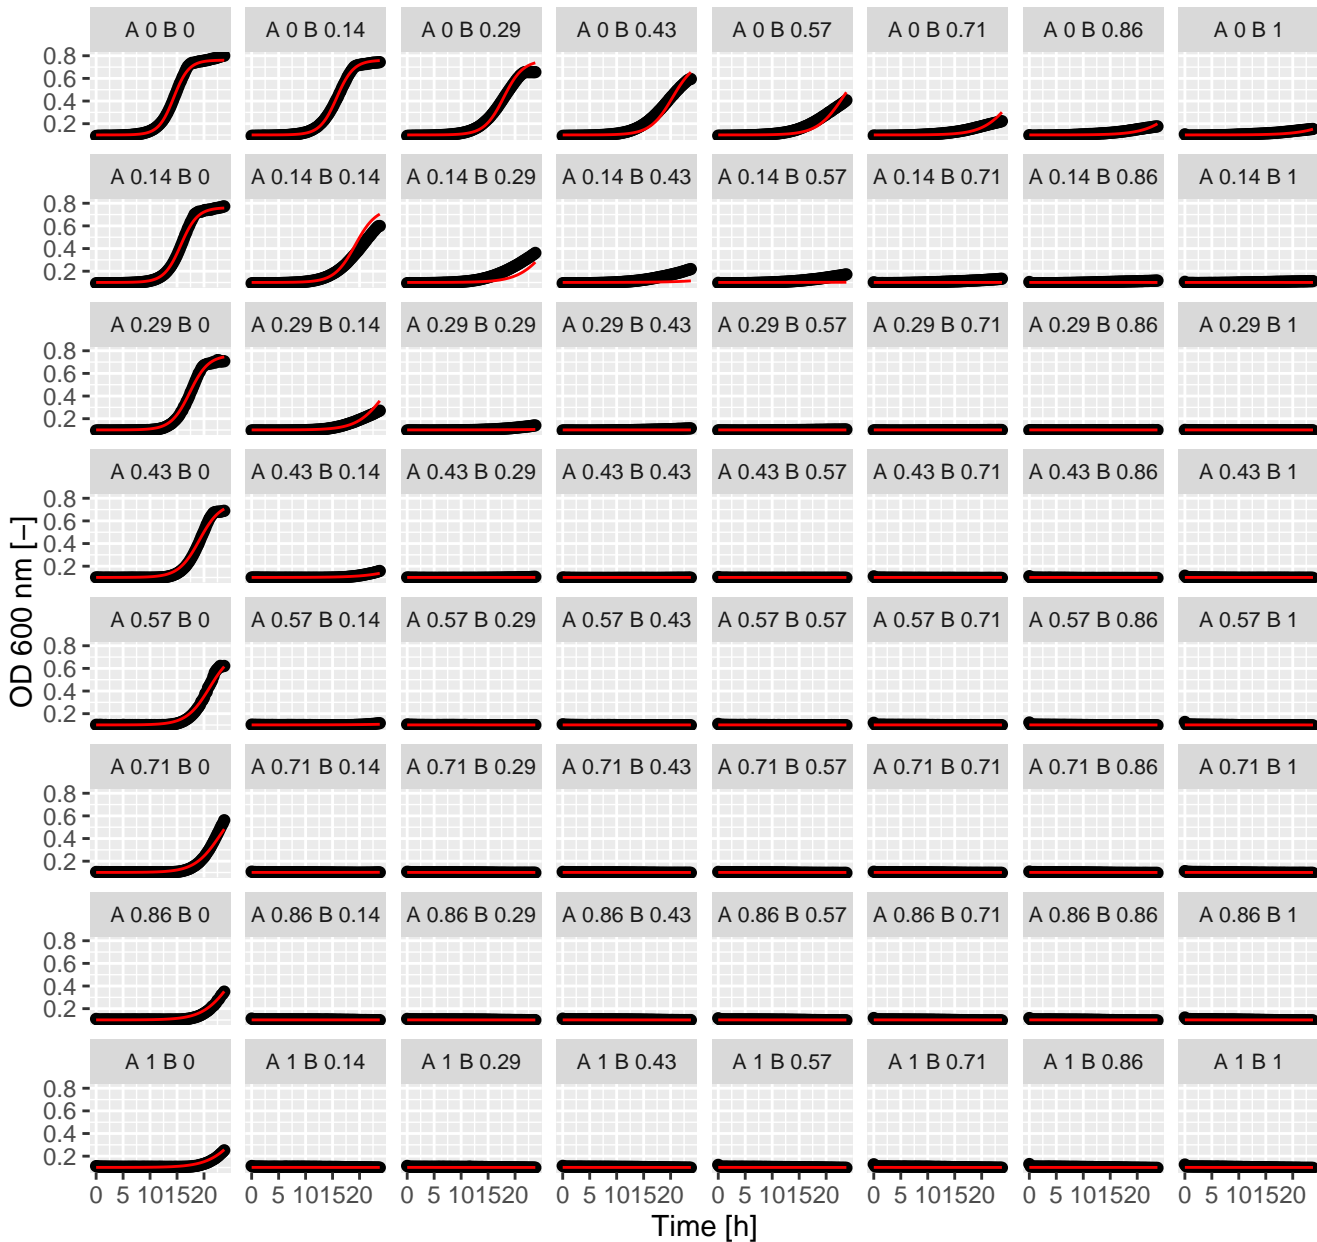

Ben.Qmy (= Ax.Bx) Emp. Bliss  
beta = -70.08

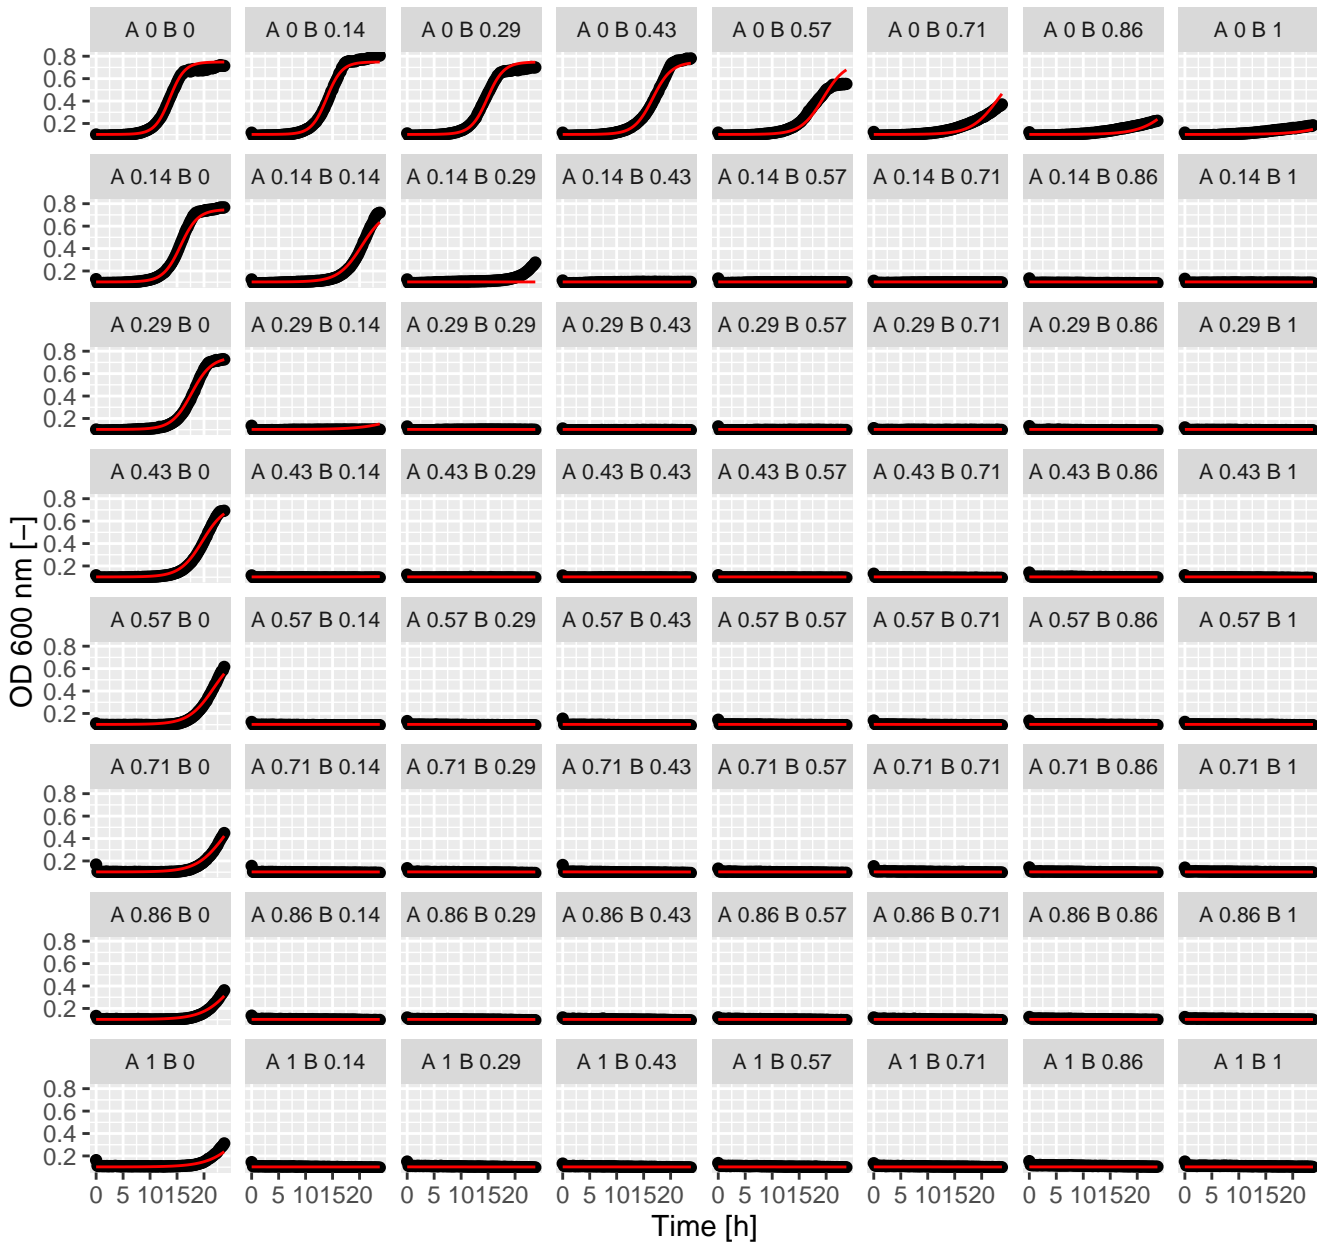

Ben.Rad (= Ax.Bx) Emp. Bliss  
beta = 0.06

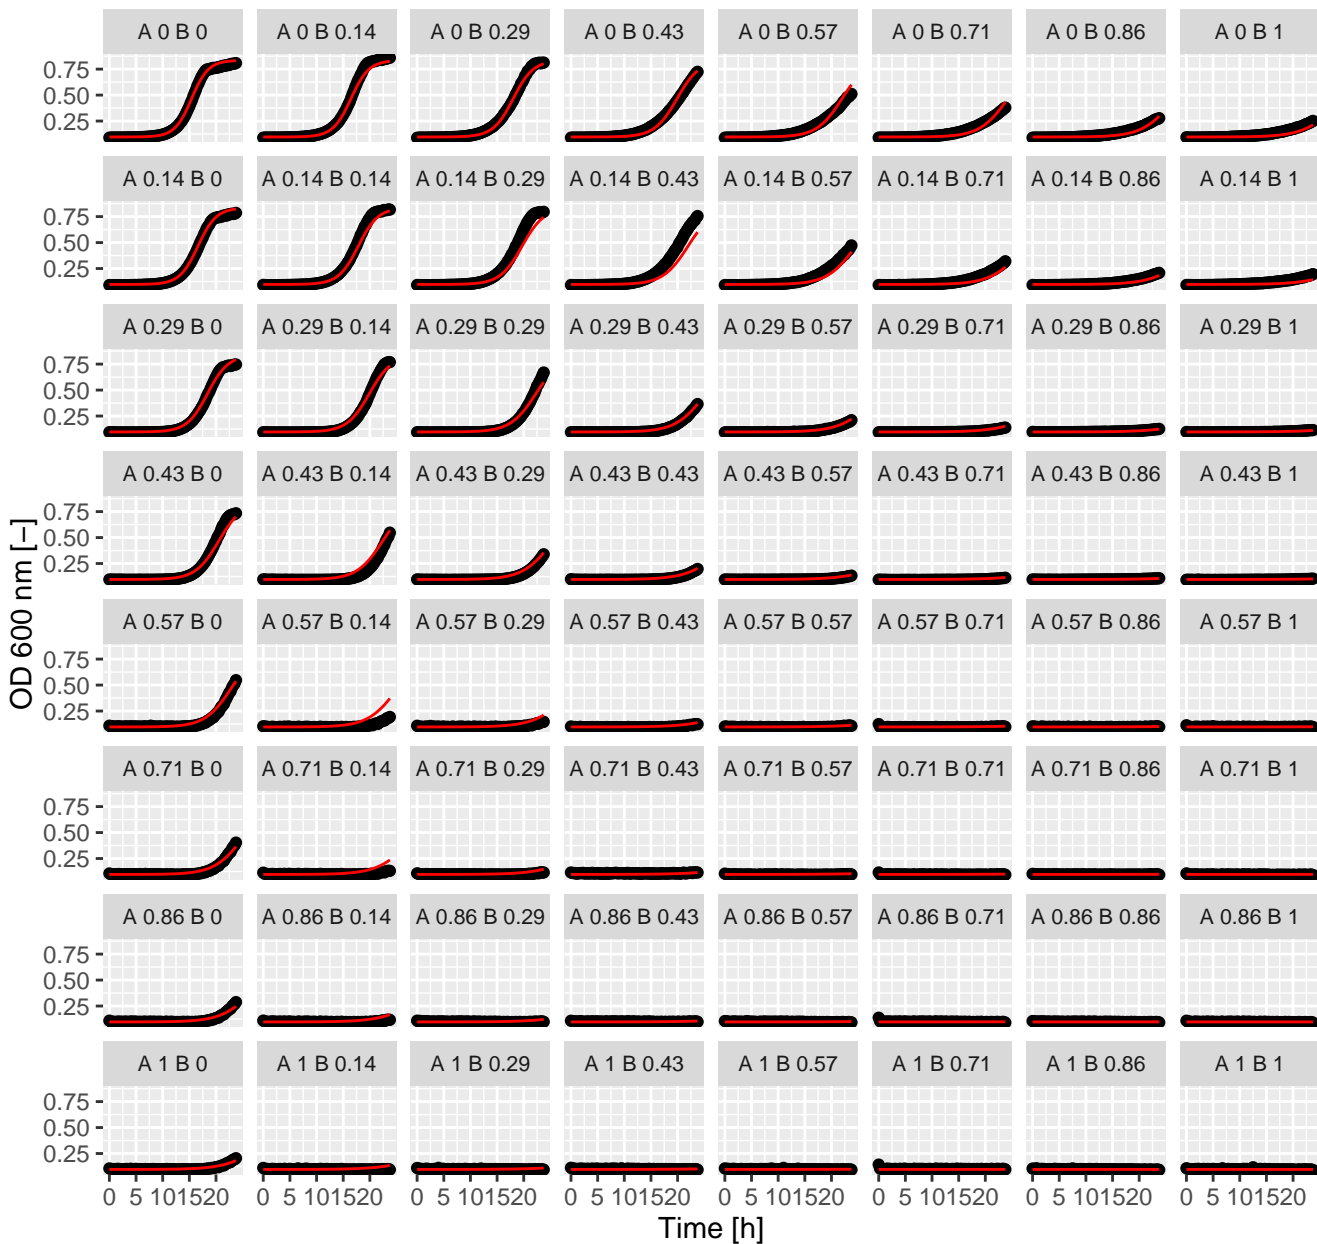

# Ben.Rap (= Ax.Bx) Emp. Bliss

beta = -0.92

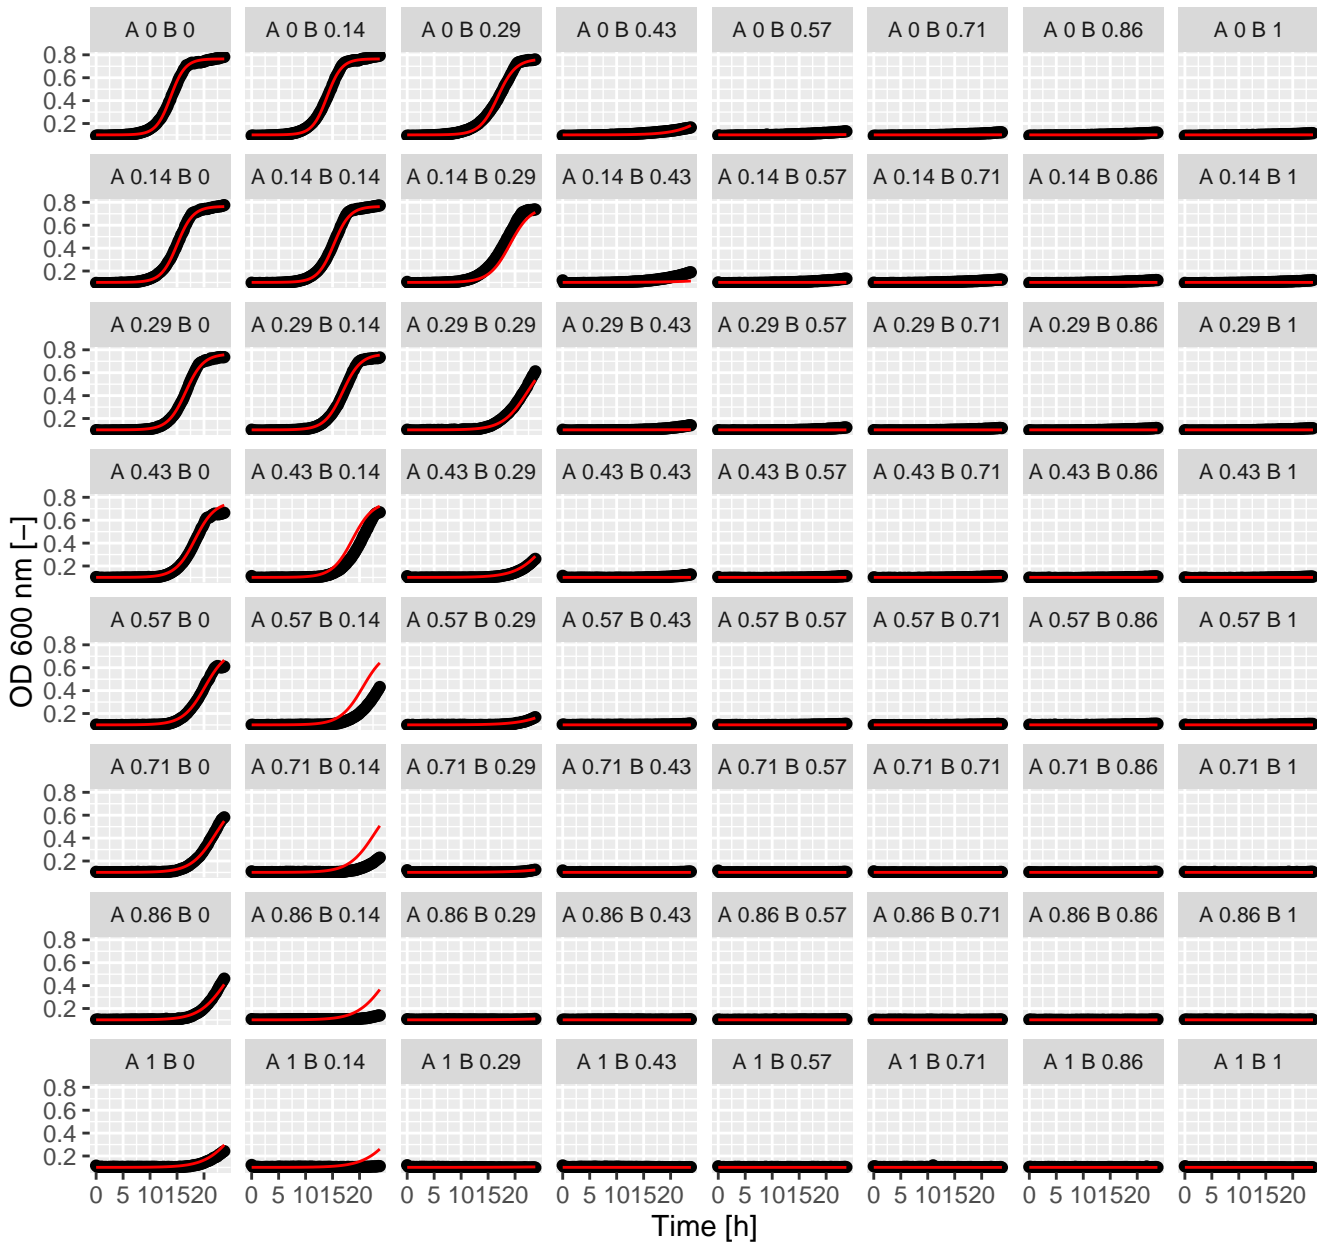



Ben.Sta (= Ax.Bx) Emp. Bliss  
beta = 1.84

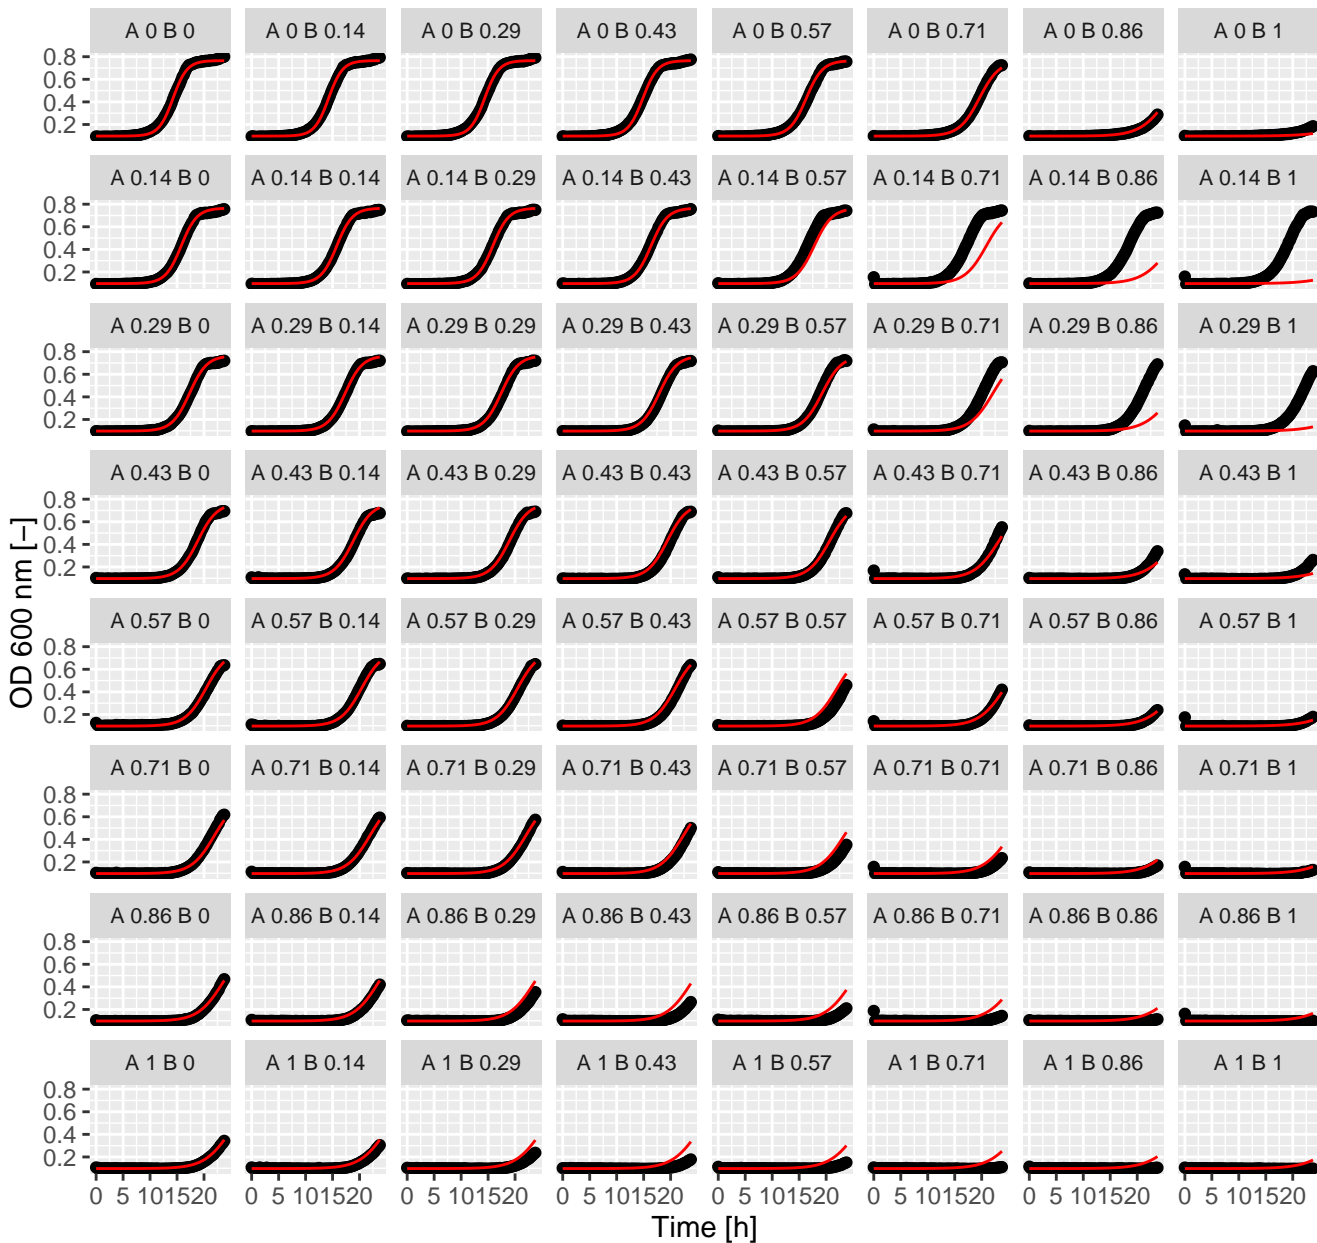

Ben.Tac (= Ax.Bx) Emp. Bliss  
beta = -2.41

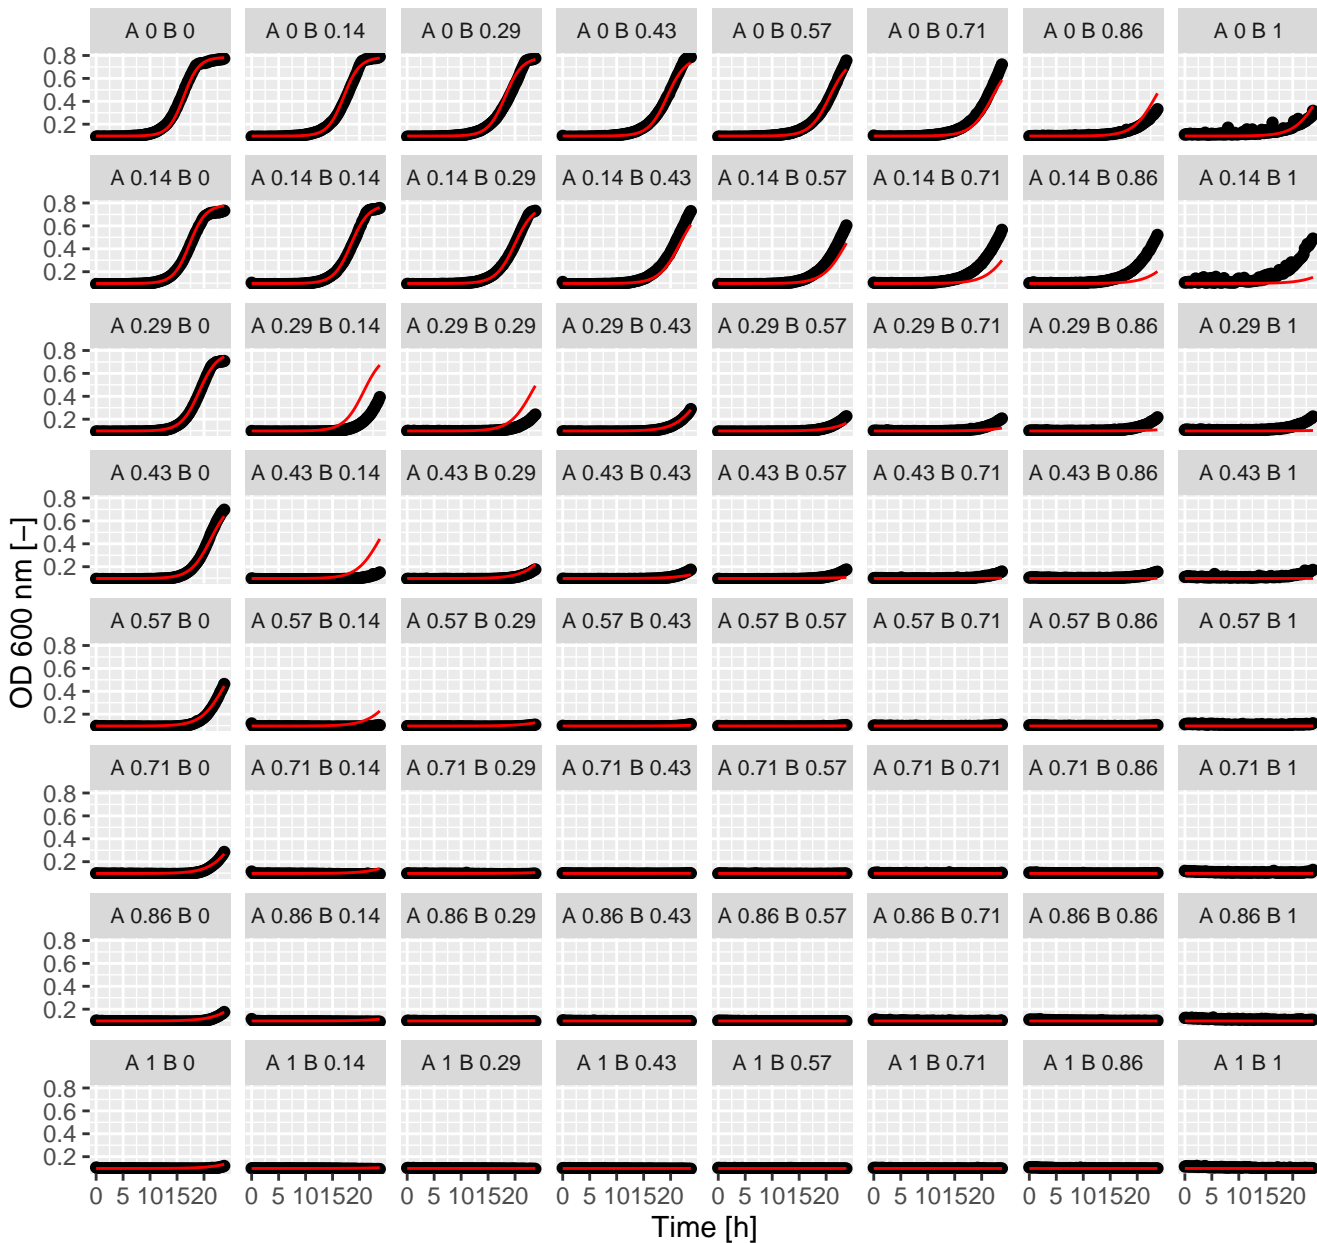

Ben.Ter (= Ax.Bx) Emp. Bliss  
beta = 1.47

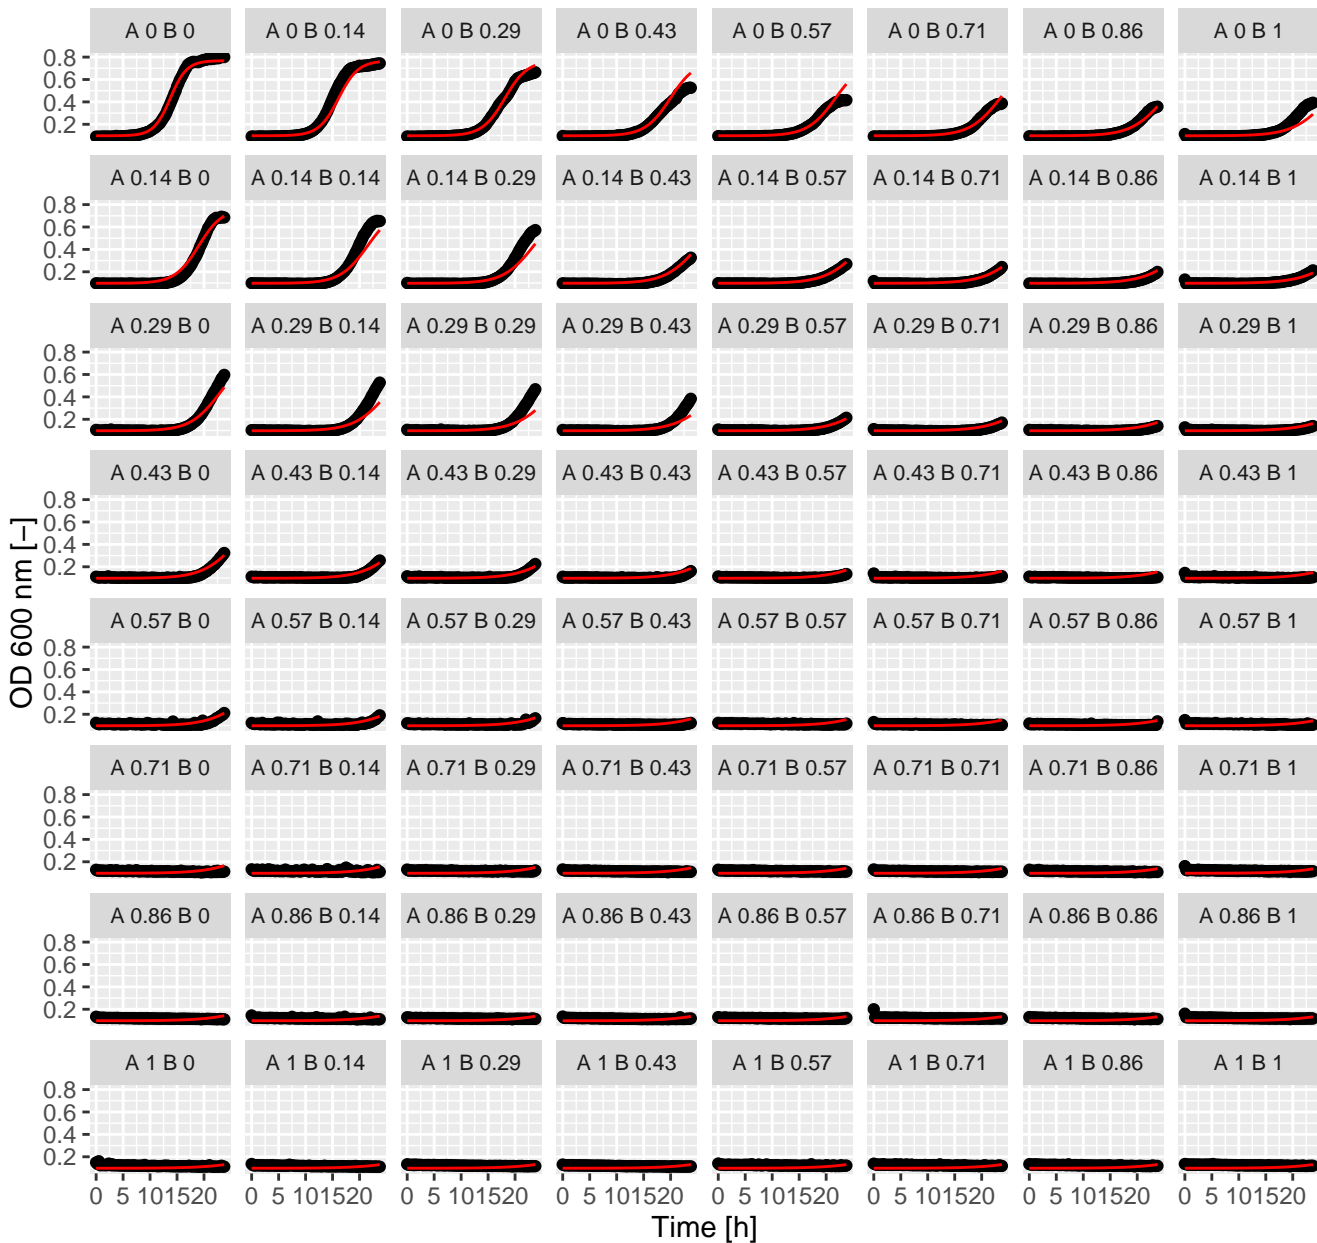

Ben.Tun (= Ax.Bx) Emp. Bliss  
beta = 1.94

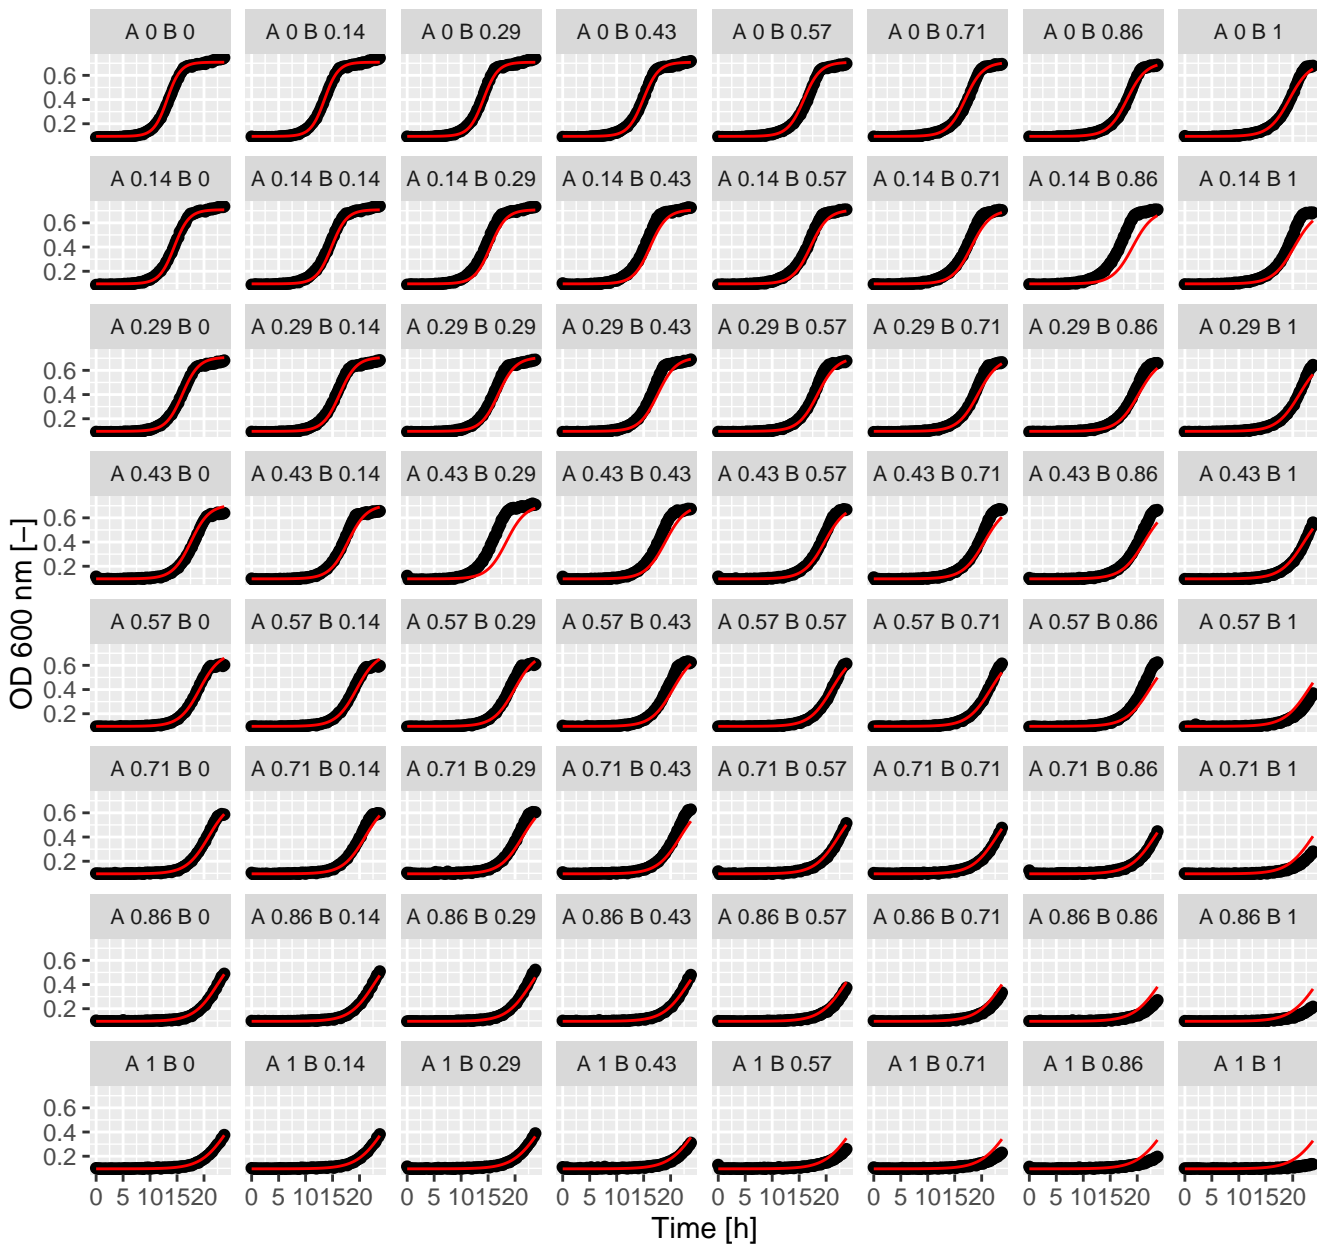

## Bro.Bro (= Ax.Bx) Emp. Bliss

beta = -489.6

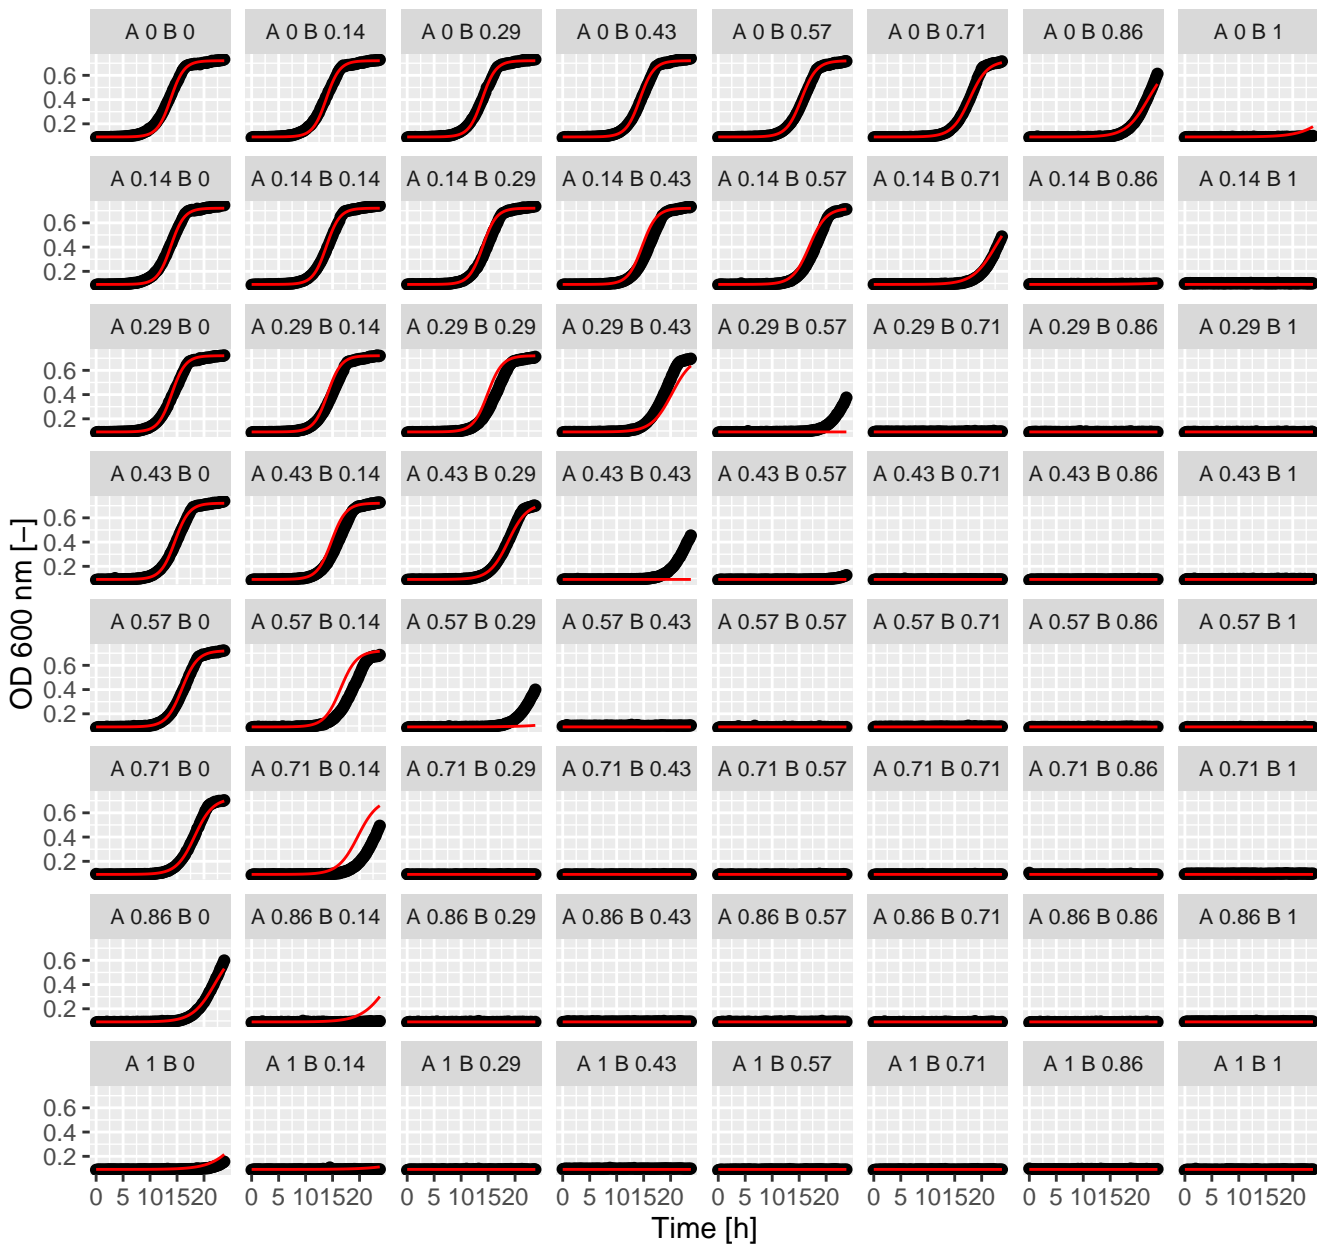

Bro.Cal (= Ax.Bx) Emp. Bliss  
beta = 0.26

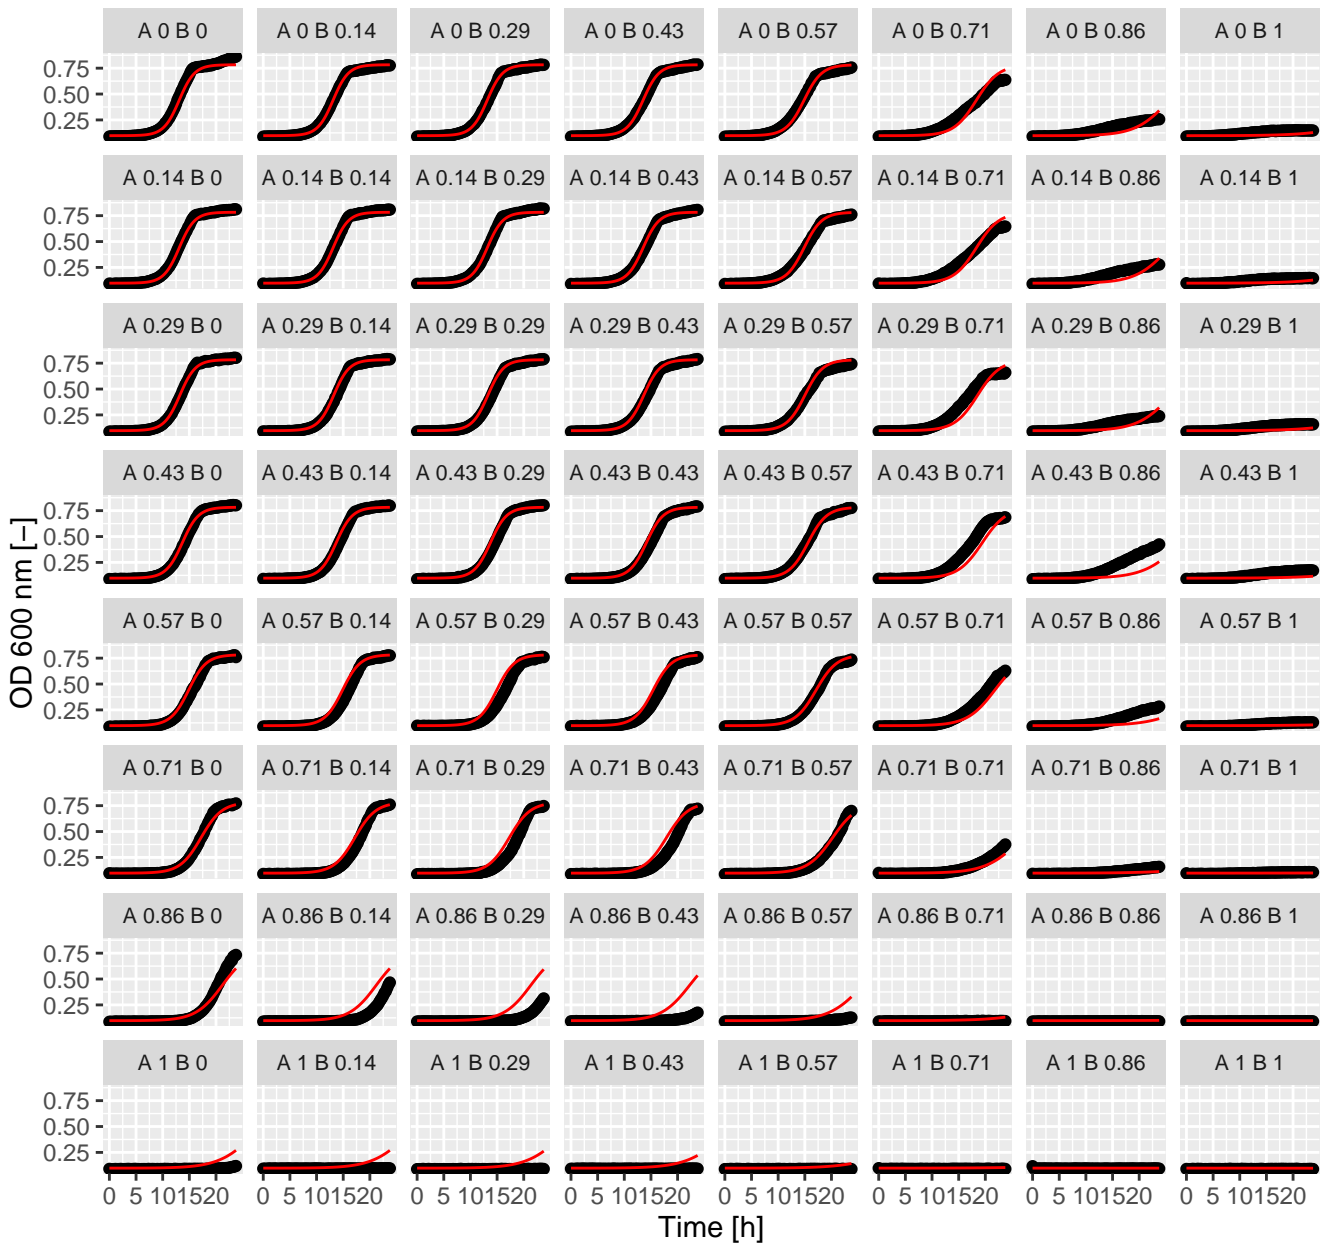

Bro.Dyc (= Ax.Bx) Emp. Bliss  
beta = 0.96

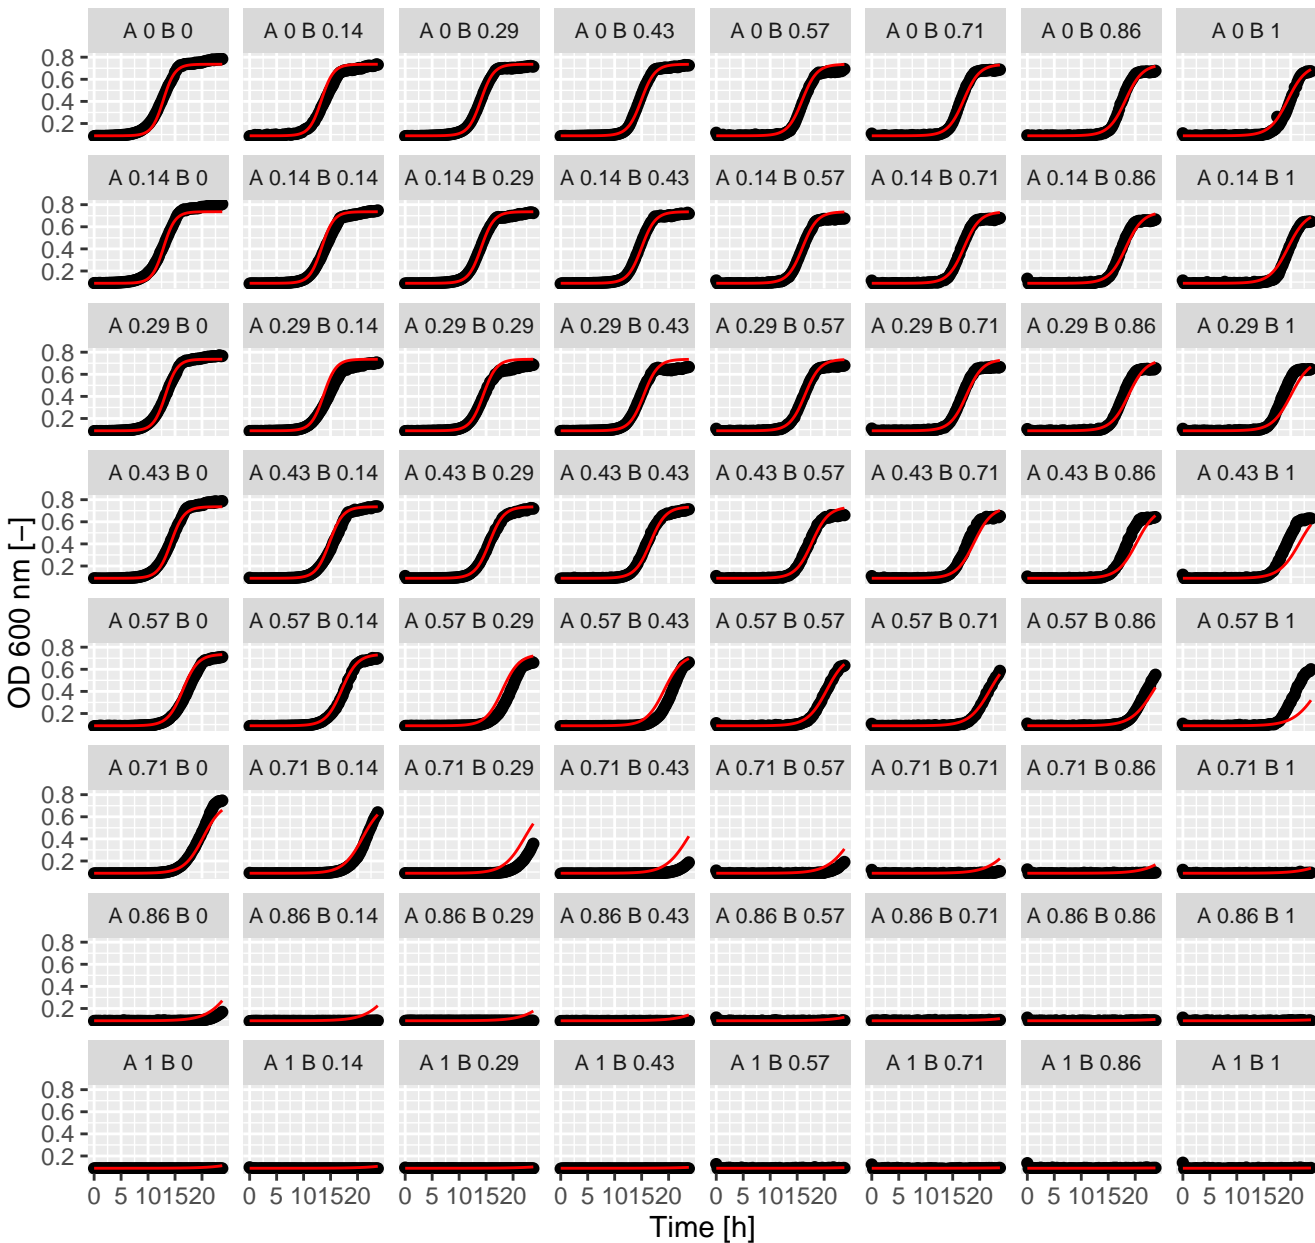

Bro.Fen (= Ax.Bx) Emp. Bliss  
beta = -0.08

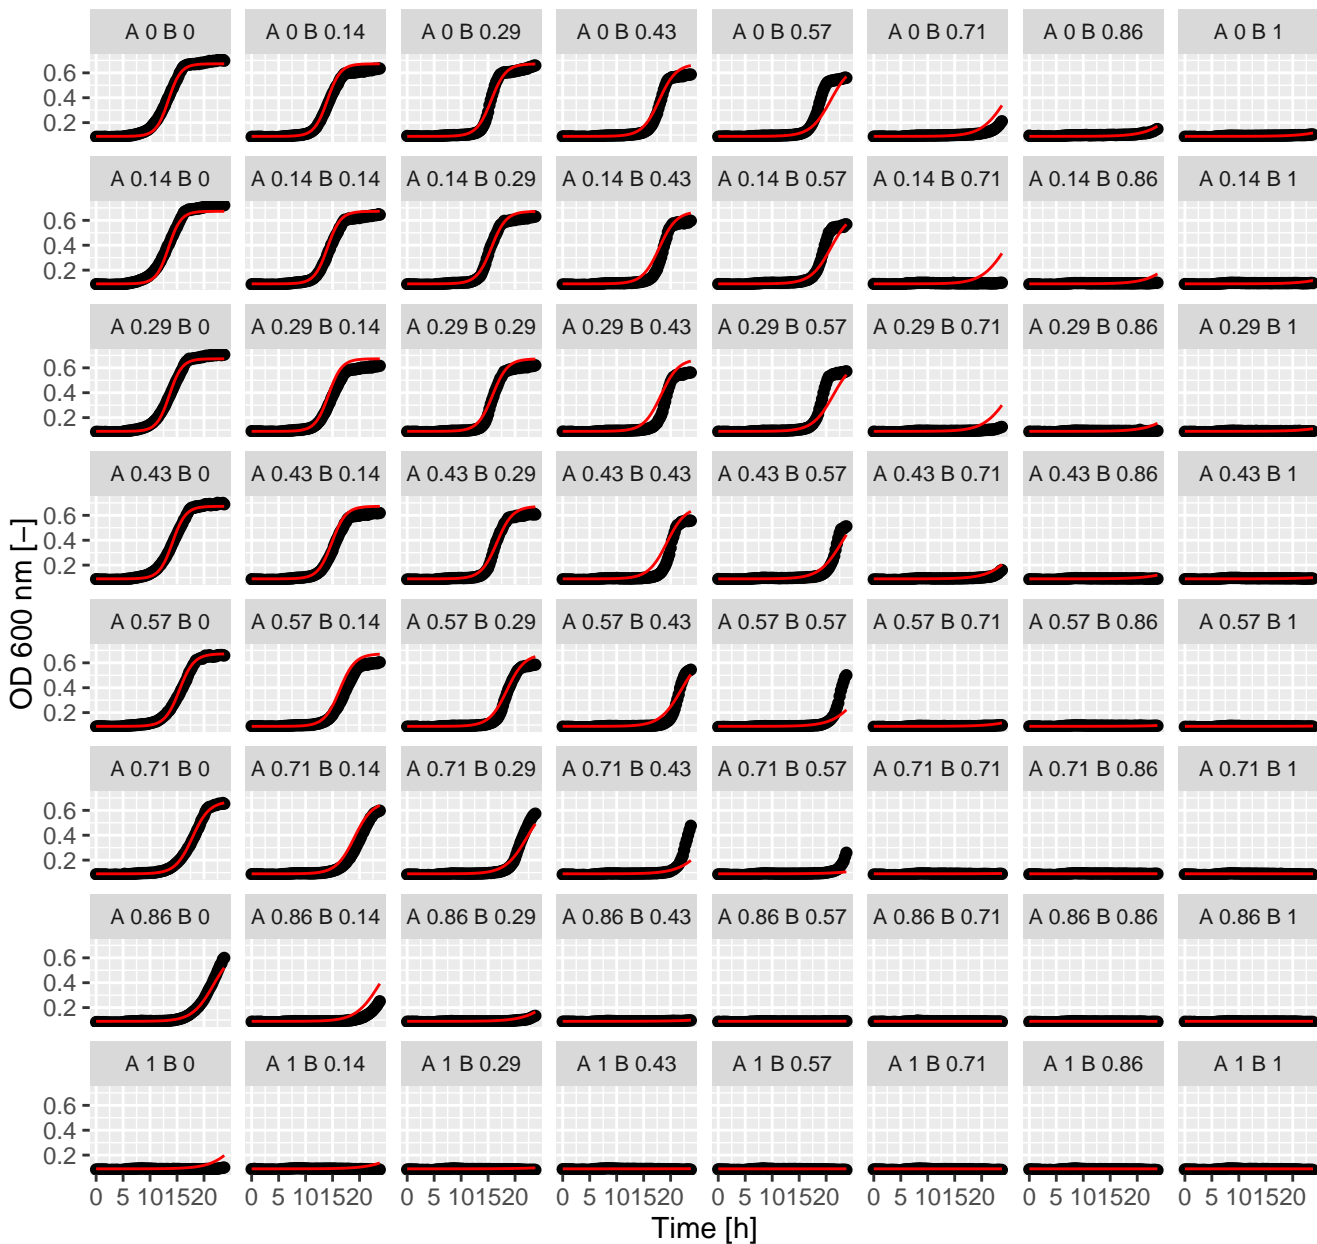



Bro.Hal (= Ax.Bx) Emp. Bliss  
beta = 0.99

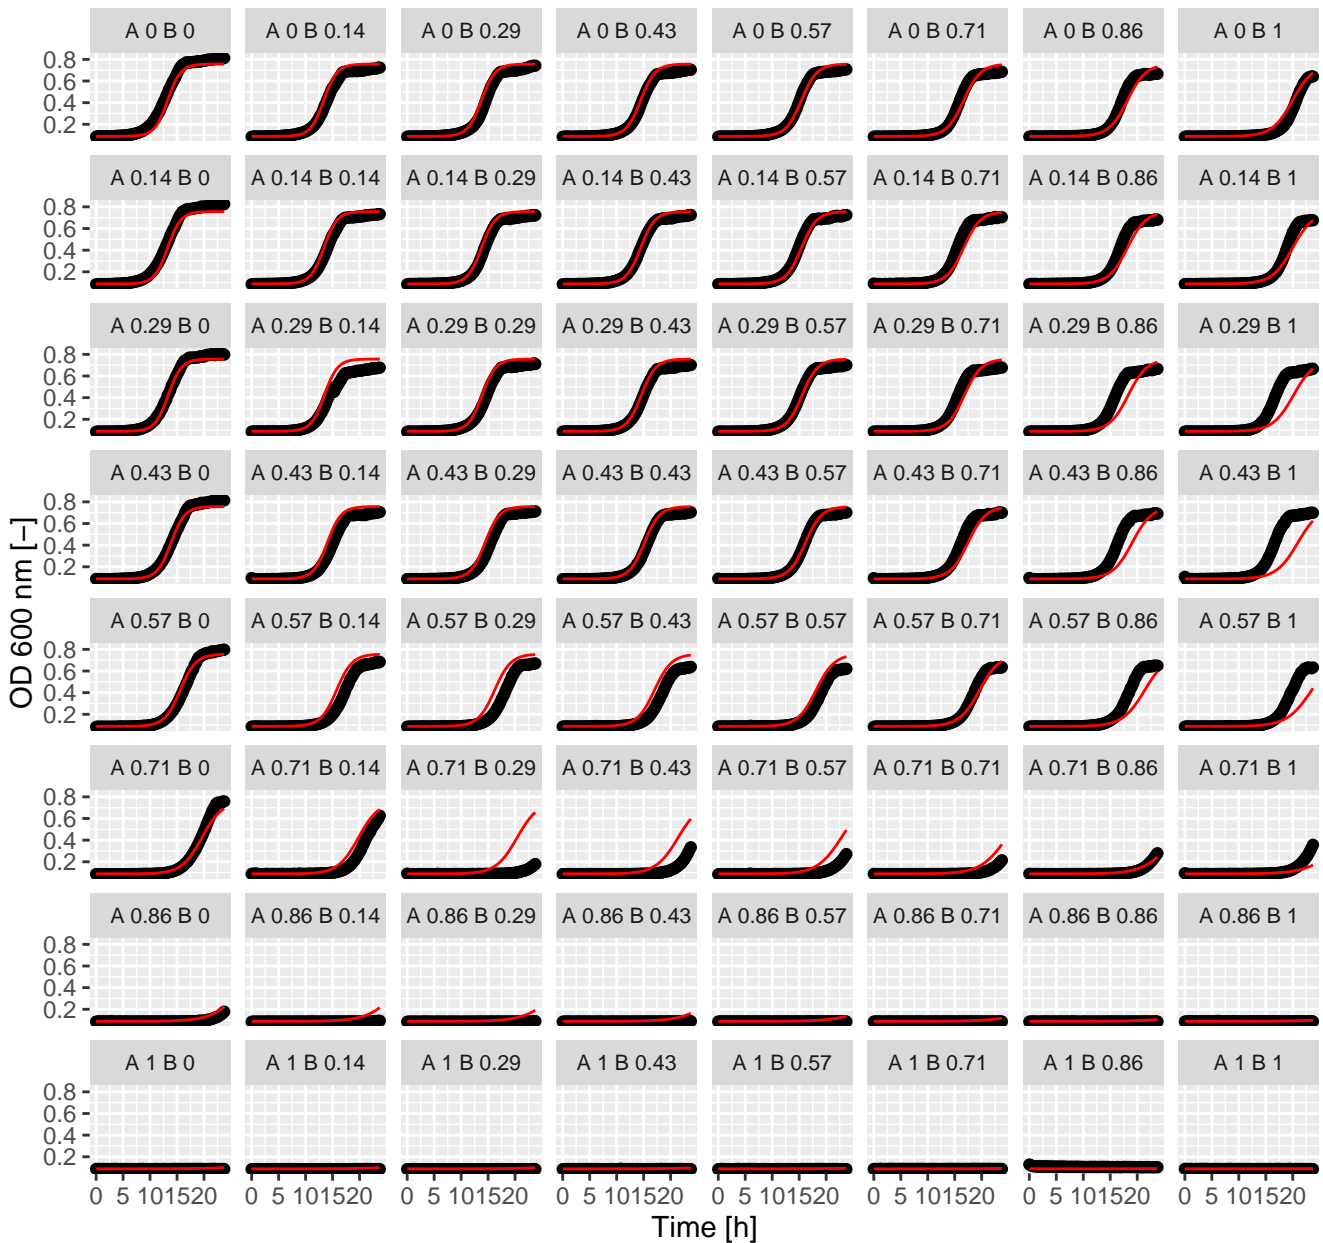

Bro.Lat (= Ax.Bx) Emp. Bliss  
beta = 0.06

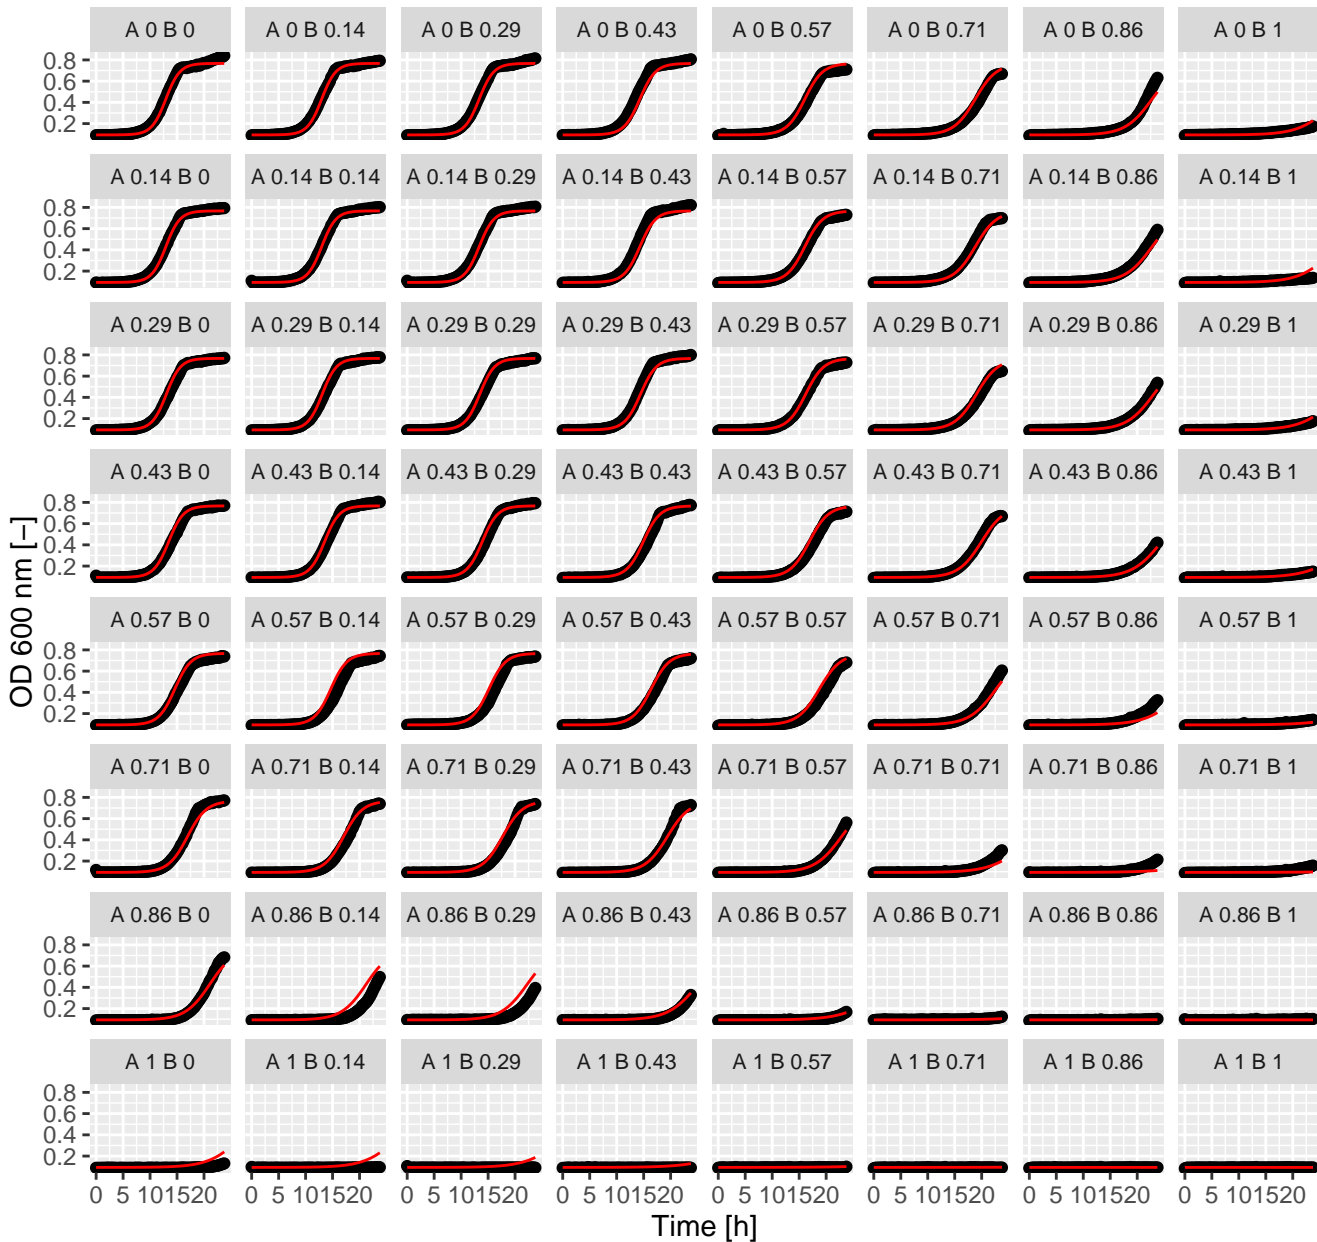

Bro.Pen (= Ax.Bx) Emp. Bliss  
beta = 0.35

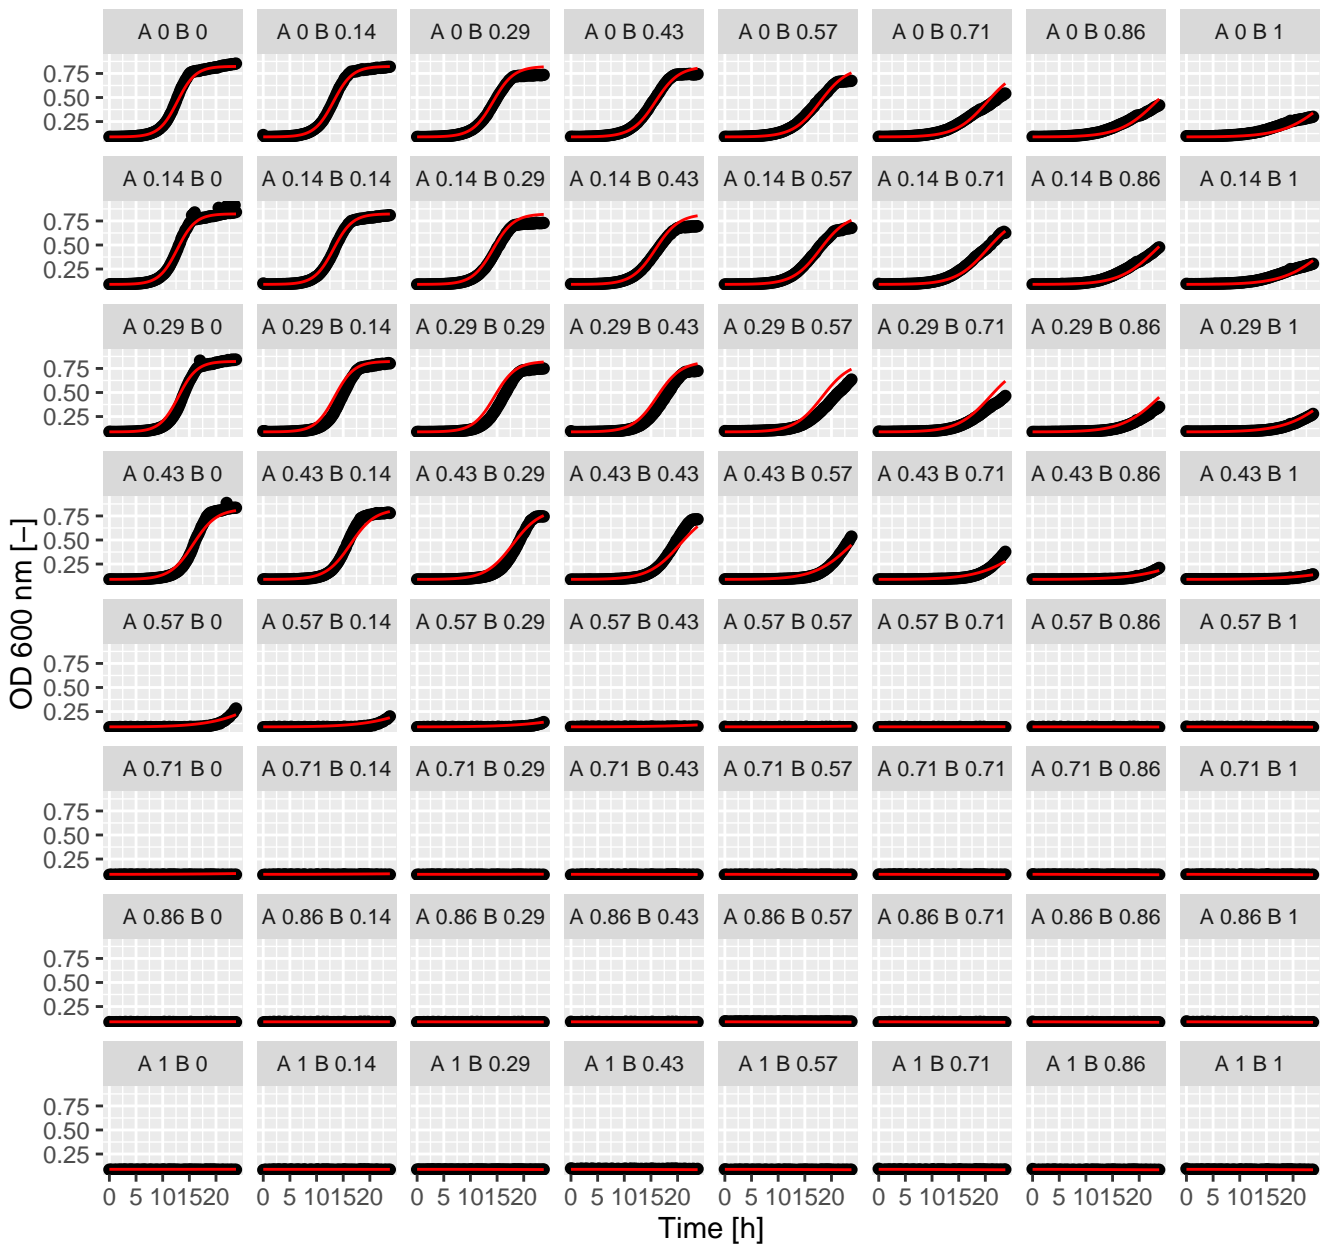

Bro.Rap (= Ax.Bx) Emp. Bliss  
beta = 1.59

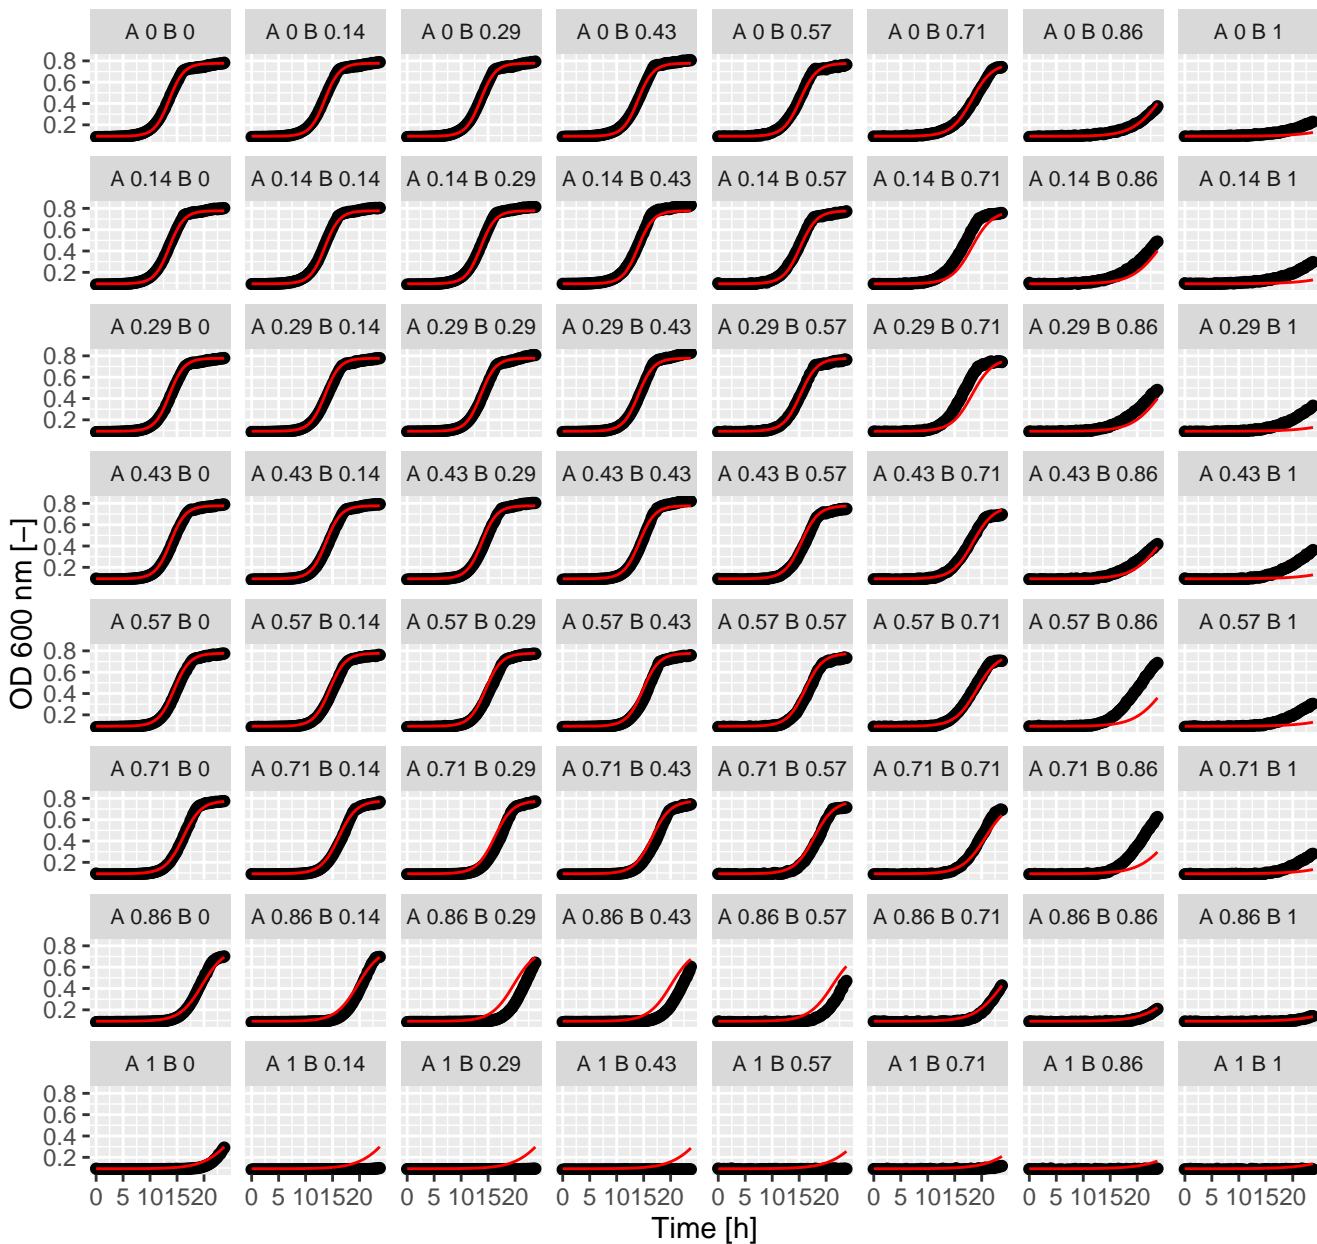

Bro.Sta (= Ax.Bx) Emp. Bliss  
beta = 2.39

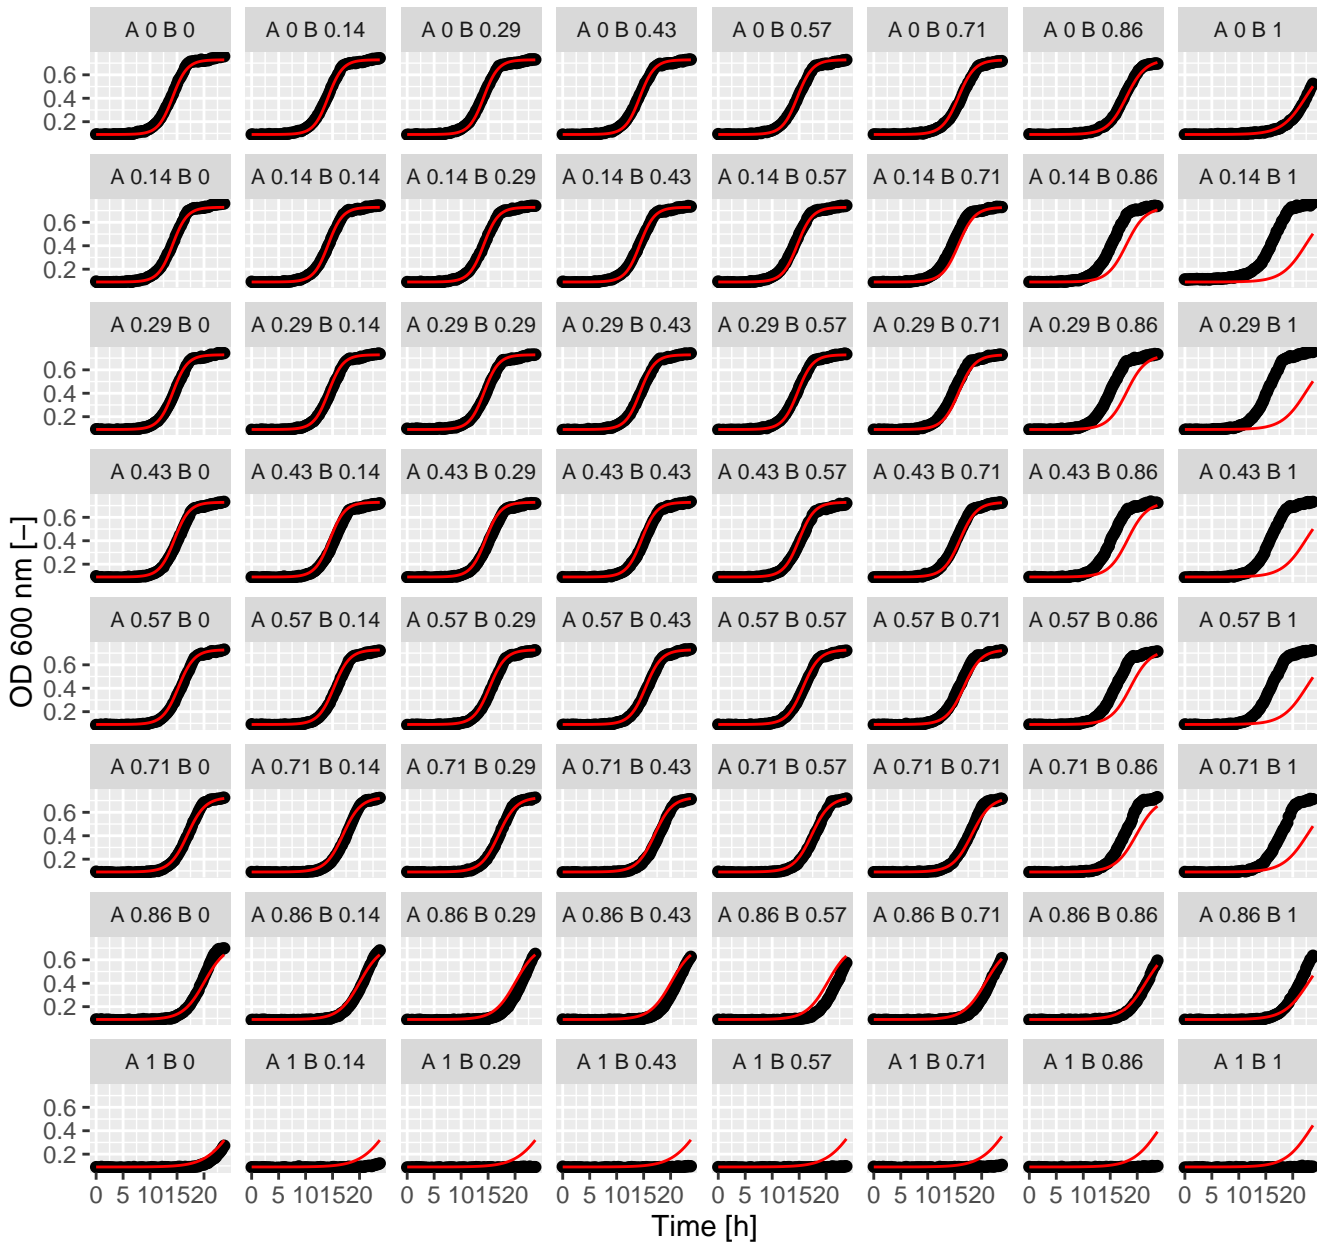

Bro.Tac (= Ax.Bx) Emp. Bliss  
beta = 1.31

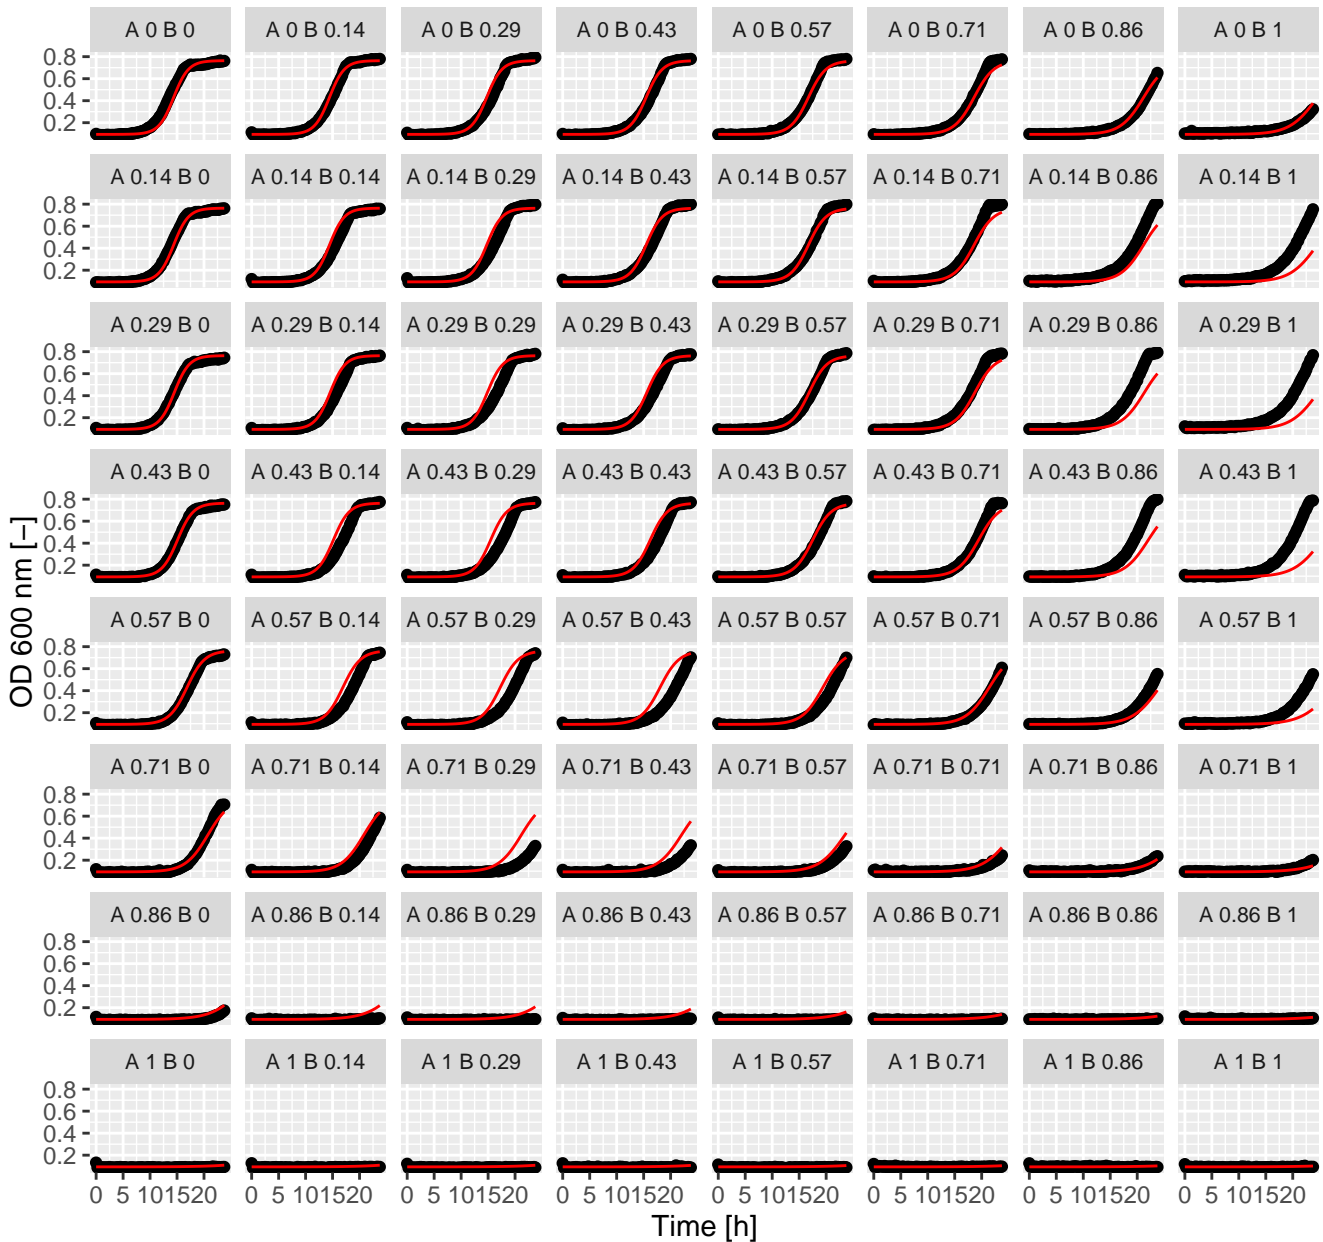

Bro.Ter (= Ax.Bx) Emp. Bliss  
beta = 0.51

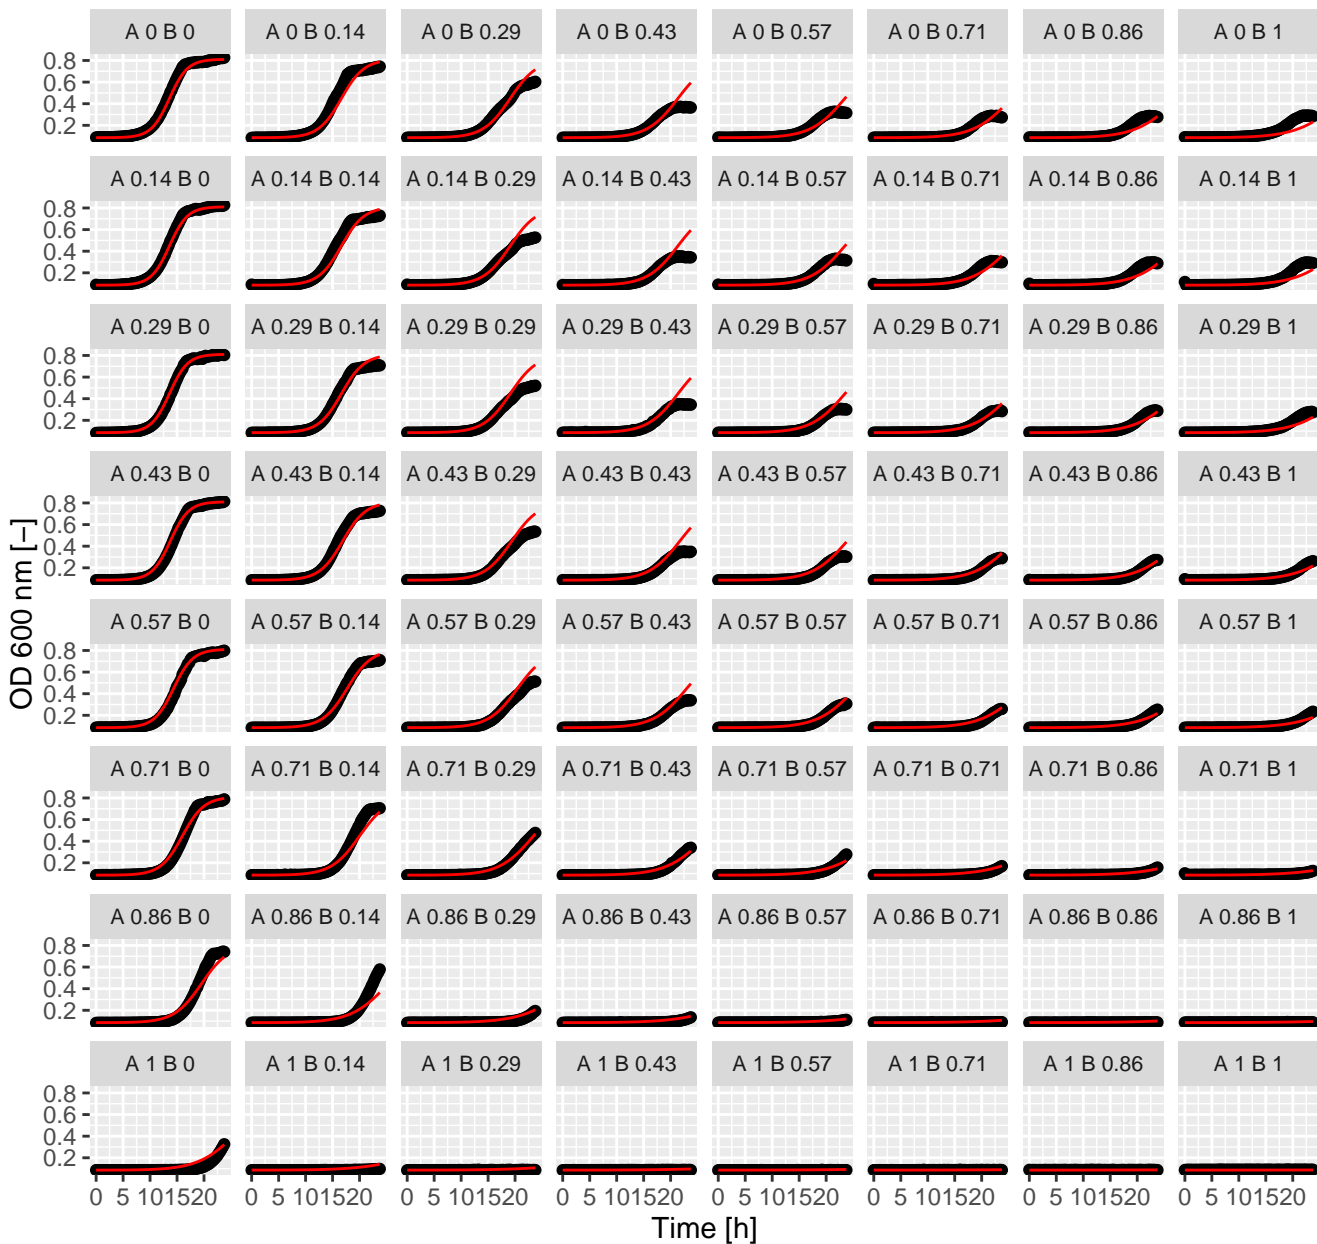

Bro.Tun (= Ax.Bx) Emp. Bliss  
beta = -8.43

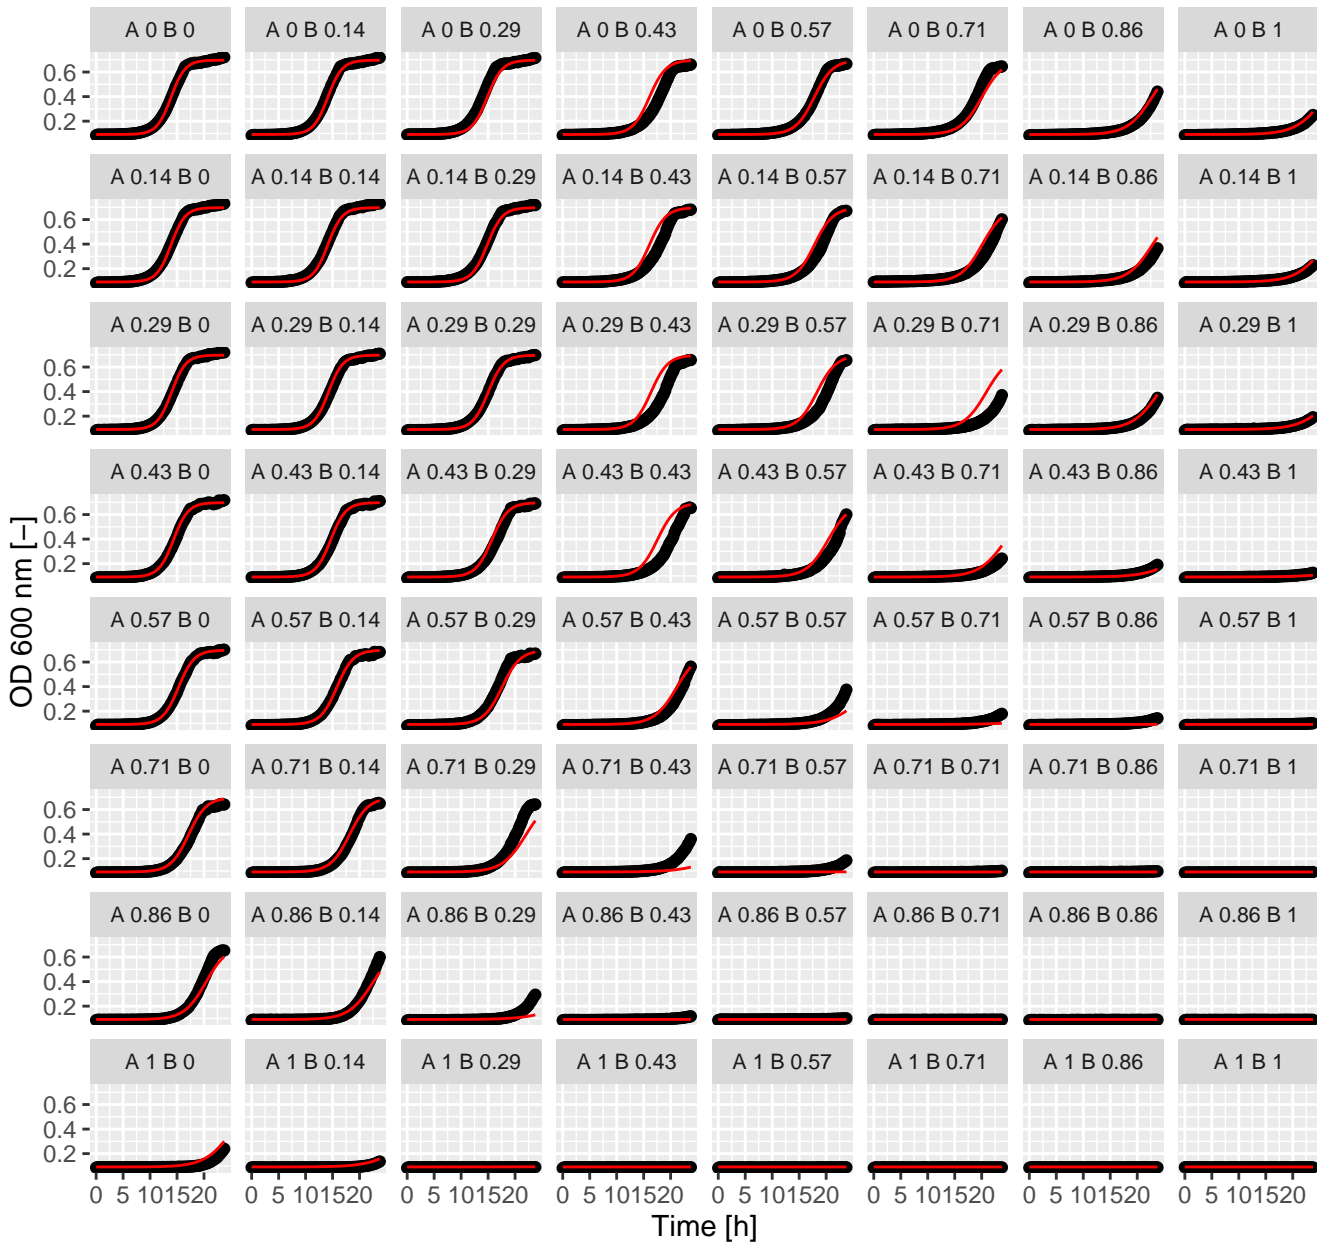



C3P.C3P (= Ax.Bx) Emp. Bliss  
beta = 1.35

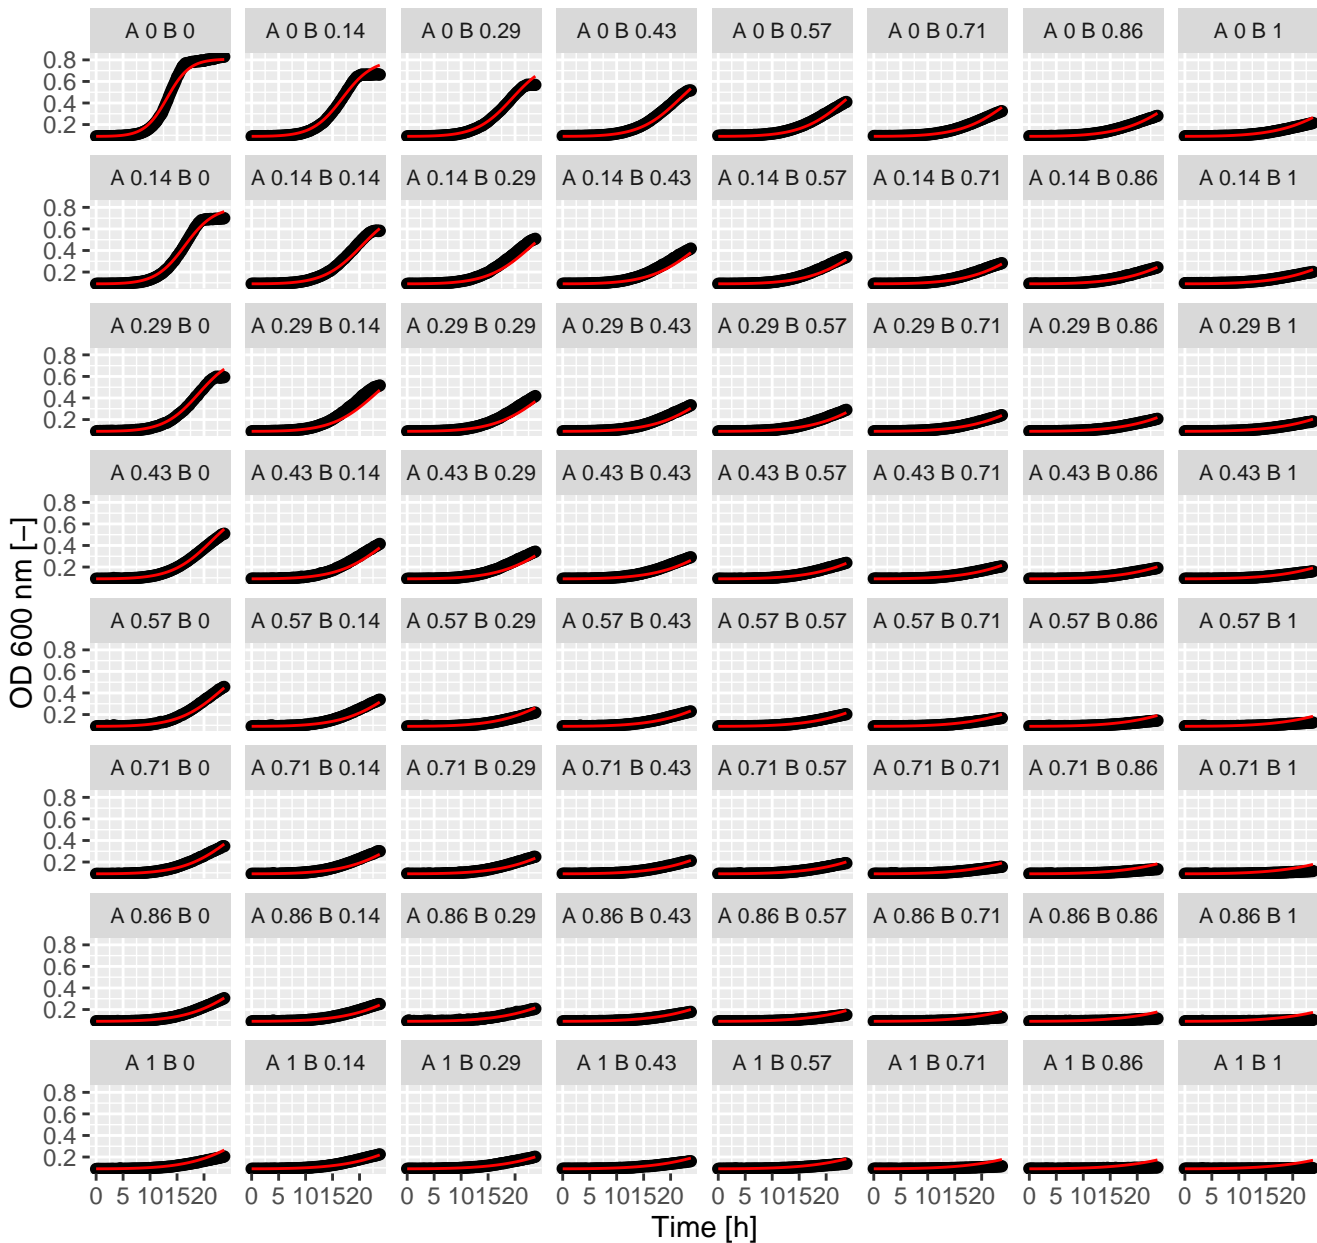

C3P.Lat (= Ax.Bx) Emp. Bliss  
beta = 0.86

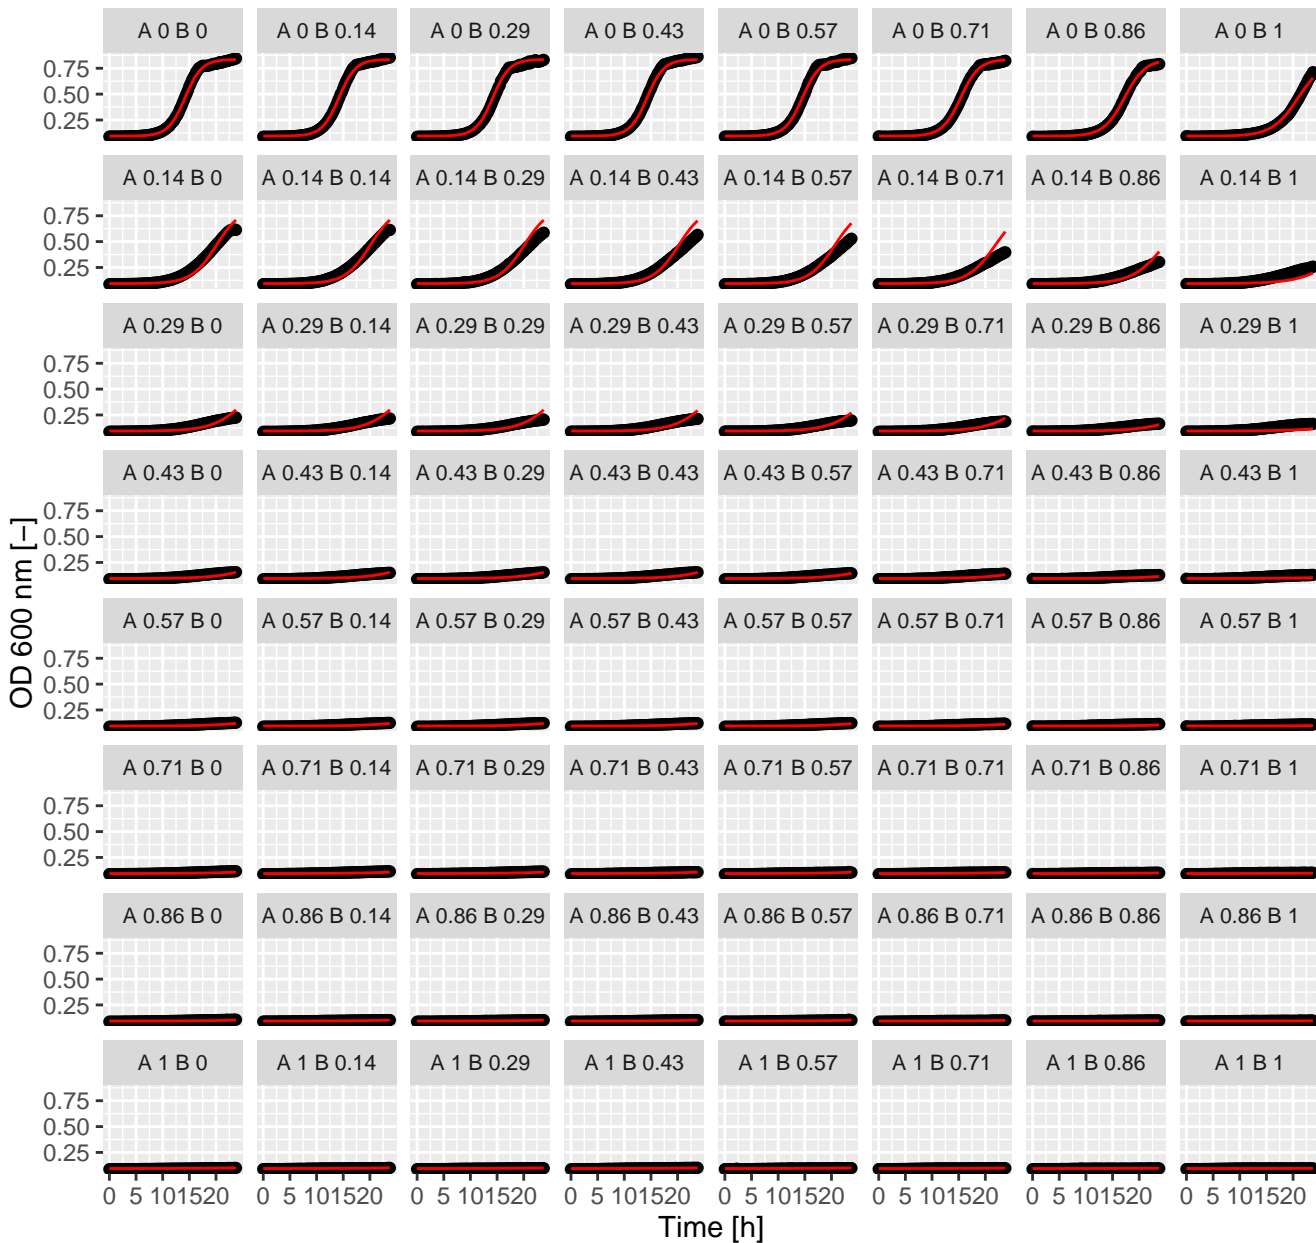

## C3P.Pen (= Ax.Bx) Emp. Bliss

beta = -56.78

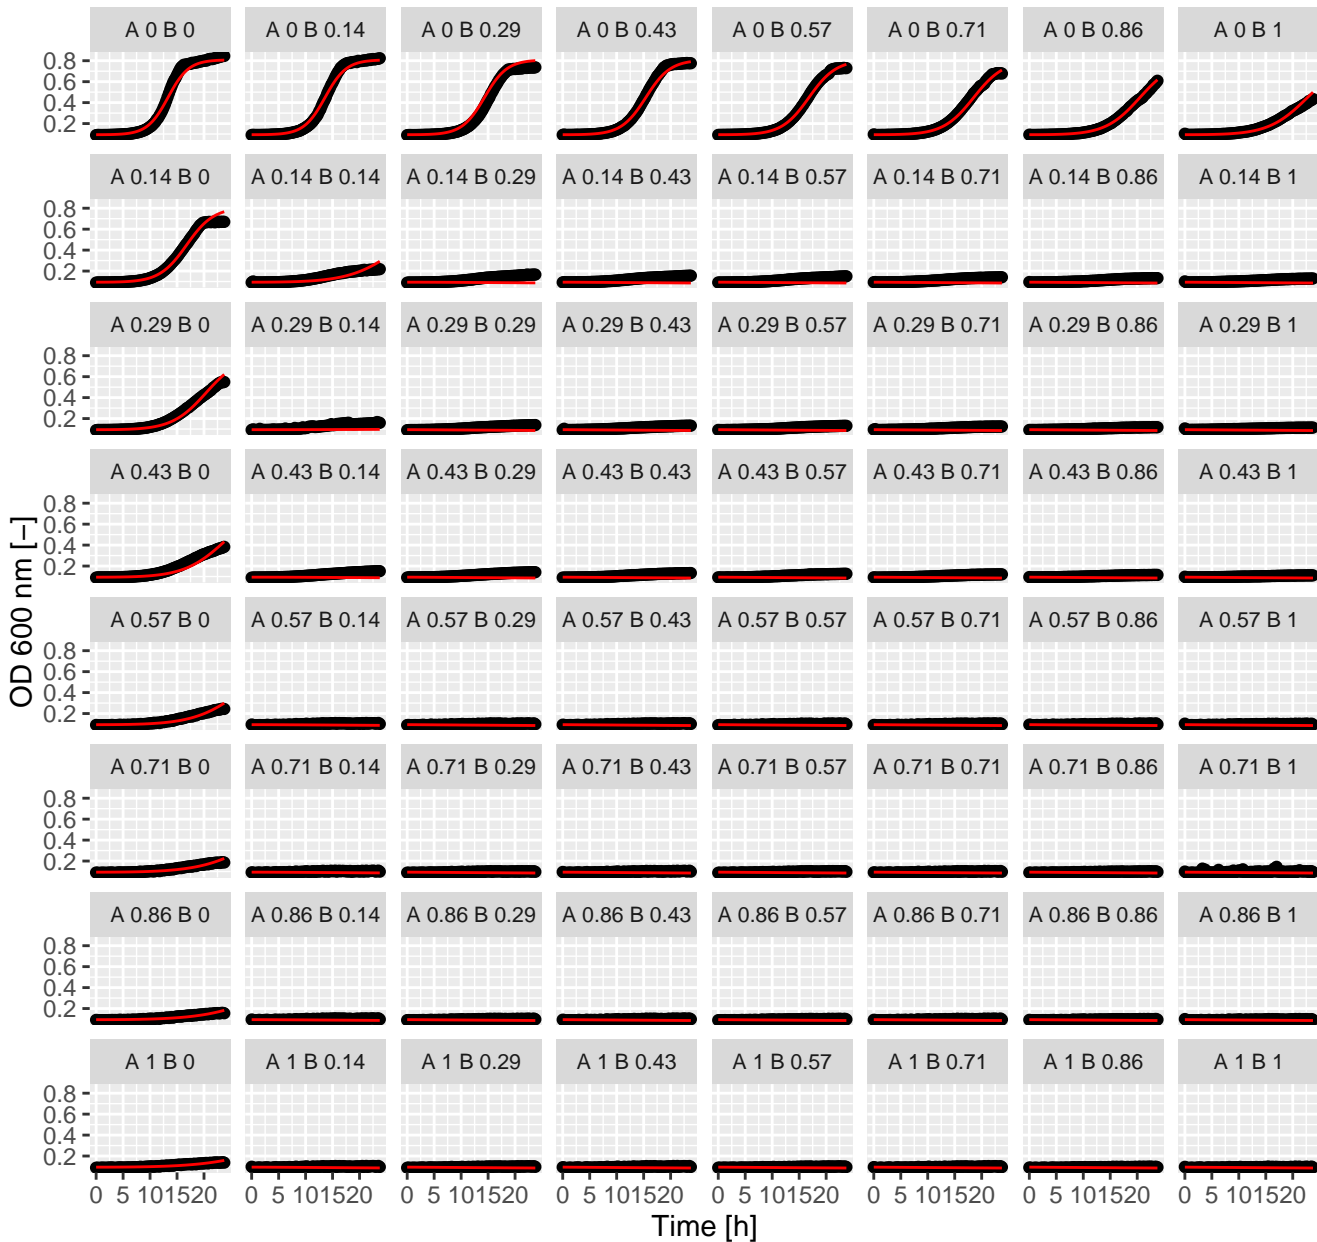

C3P.Sta (= Ax.Bx) Emp. Bliss  
beta = 0.21

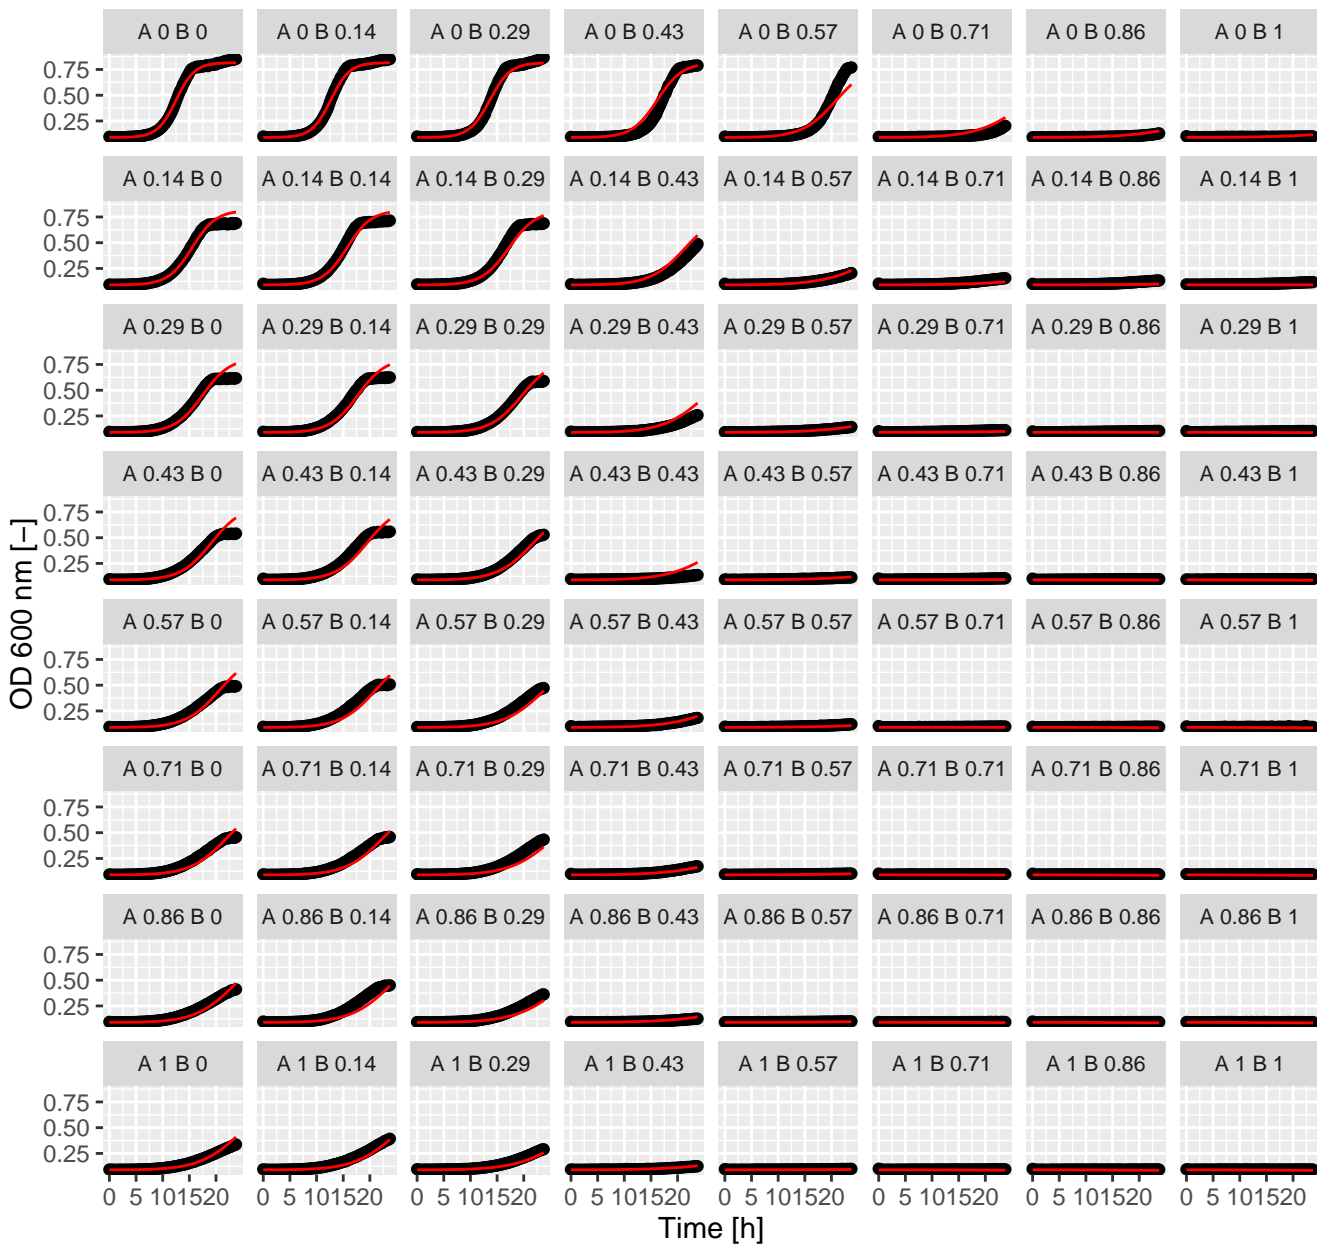

# C3P.Tac (= Ax.Bx) Emp. Bliss

beta = 2.28

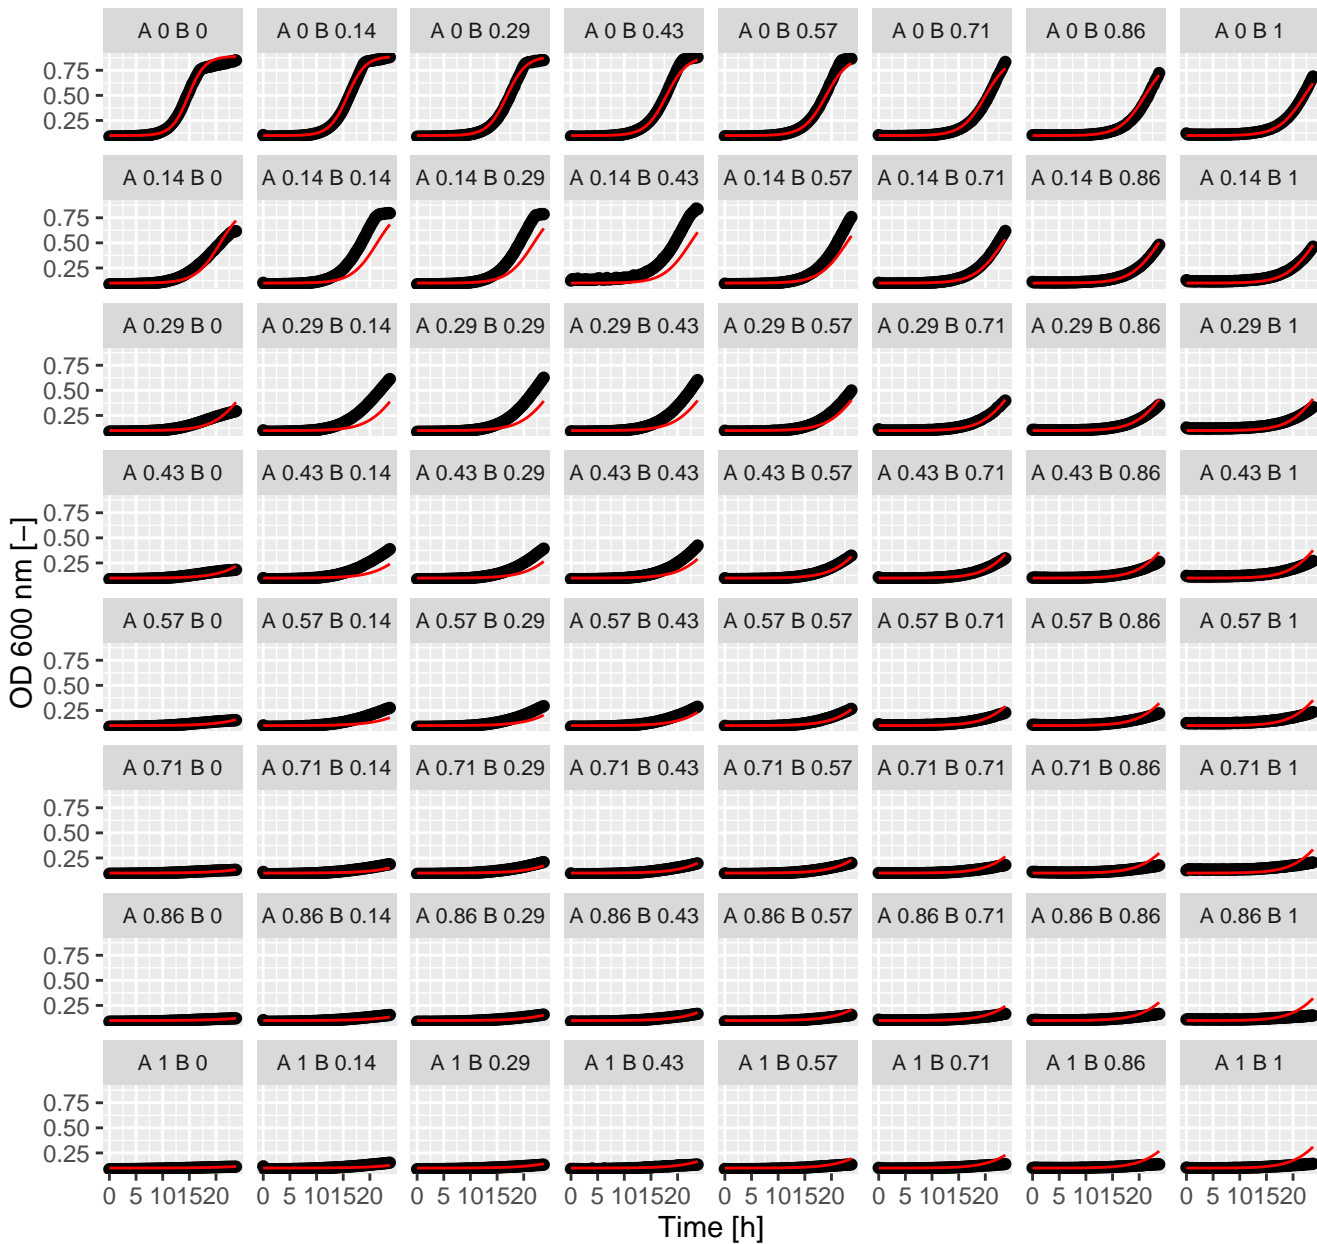

C3P.Ter (= Ax.Bx) Emp. Bliss  
beta = 1.29

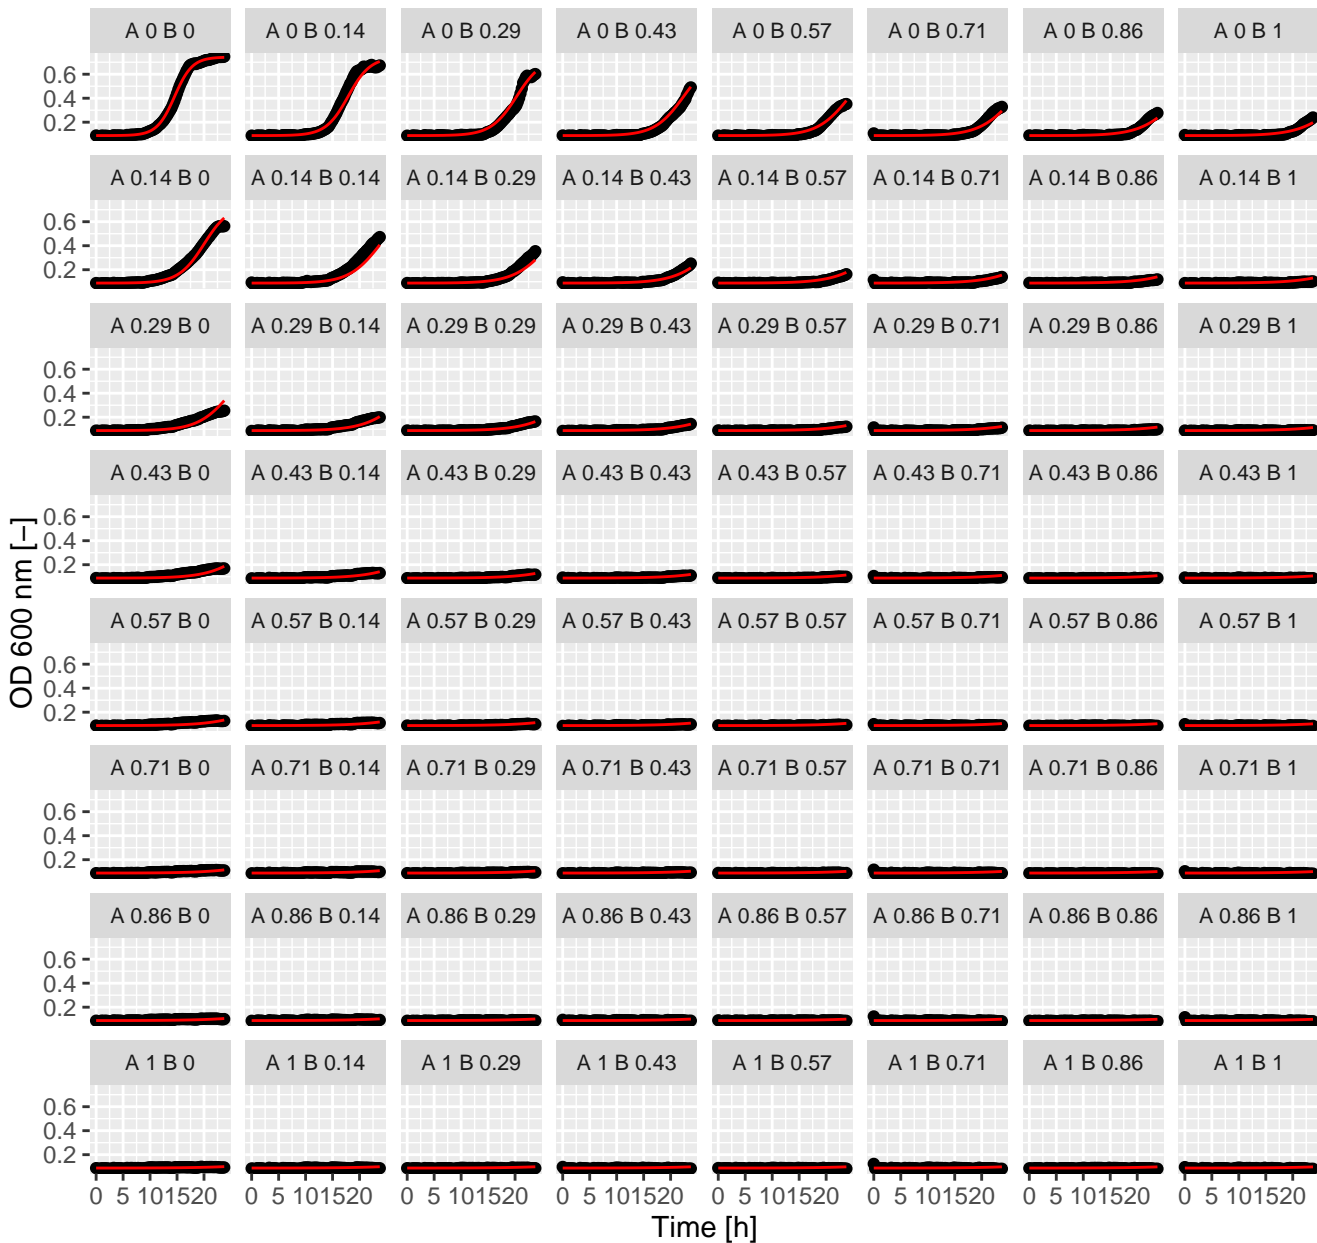

Cal.Cal (= Ax.Bx) Emp. Bliss  
beta = -14835.6

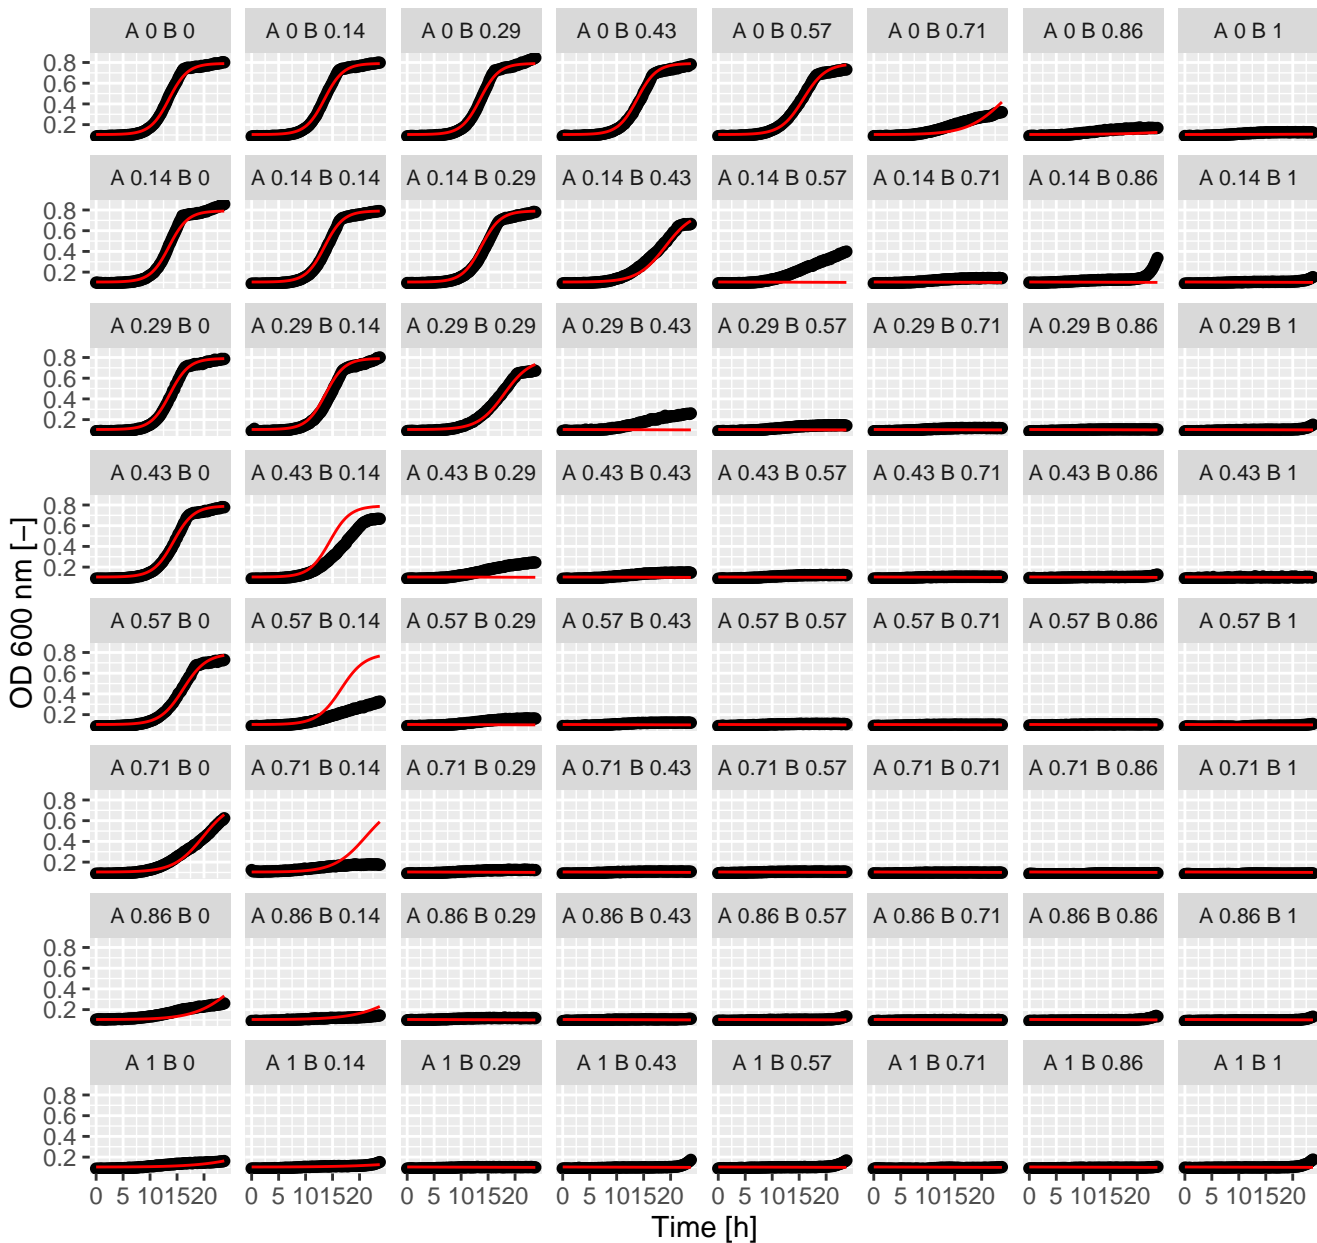

Cal.Dyc (= Ax.Bx) Emp. Bliss  
beta = -283341.2

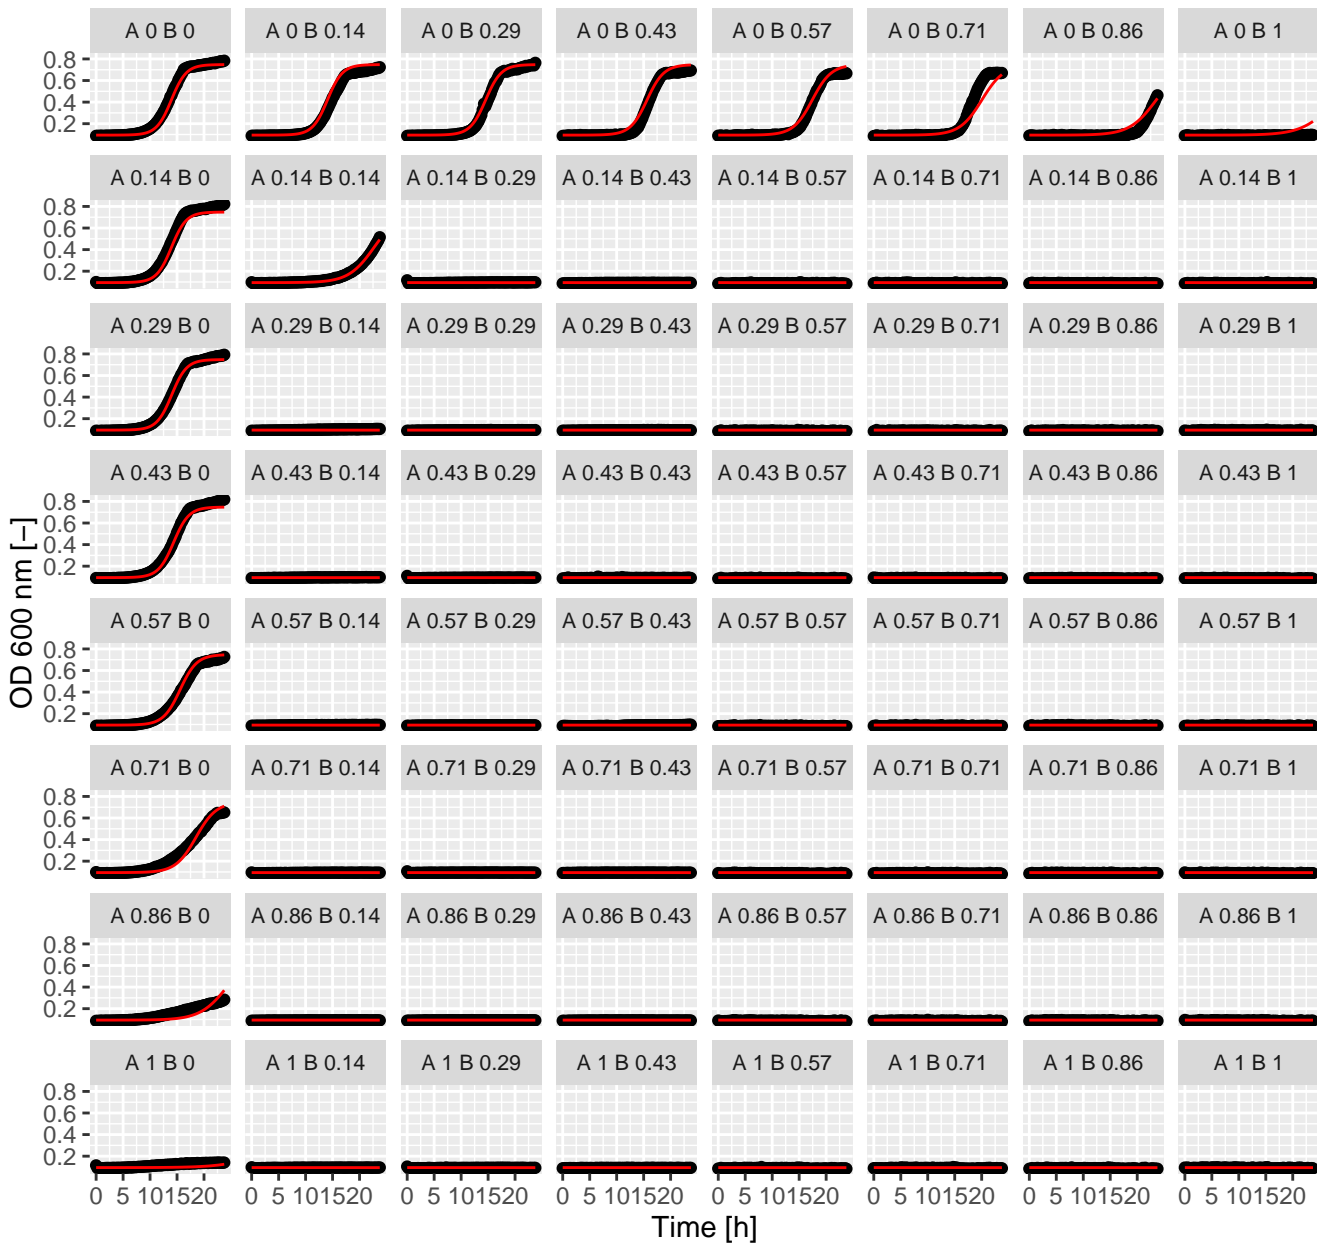



Cal.Fen (= Ax.Bx) Emp. Bliss  
beta = -44646.8

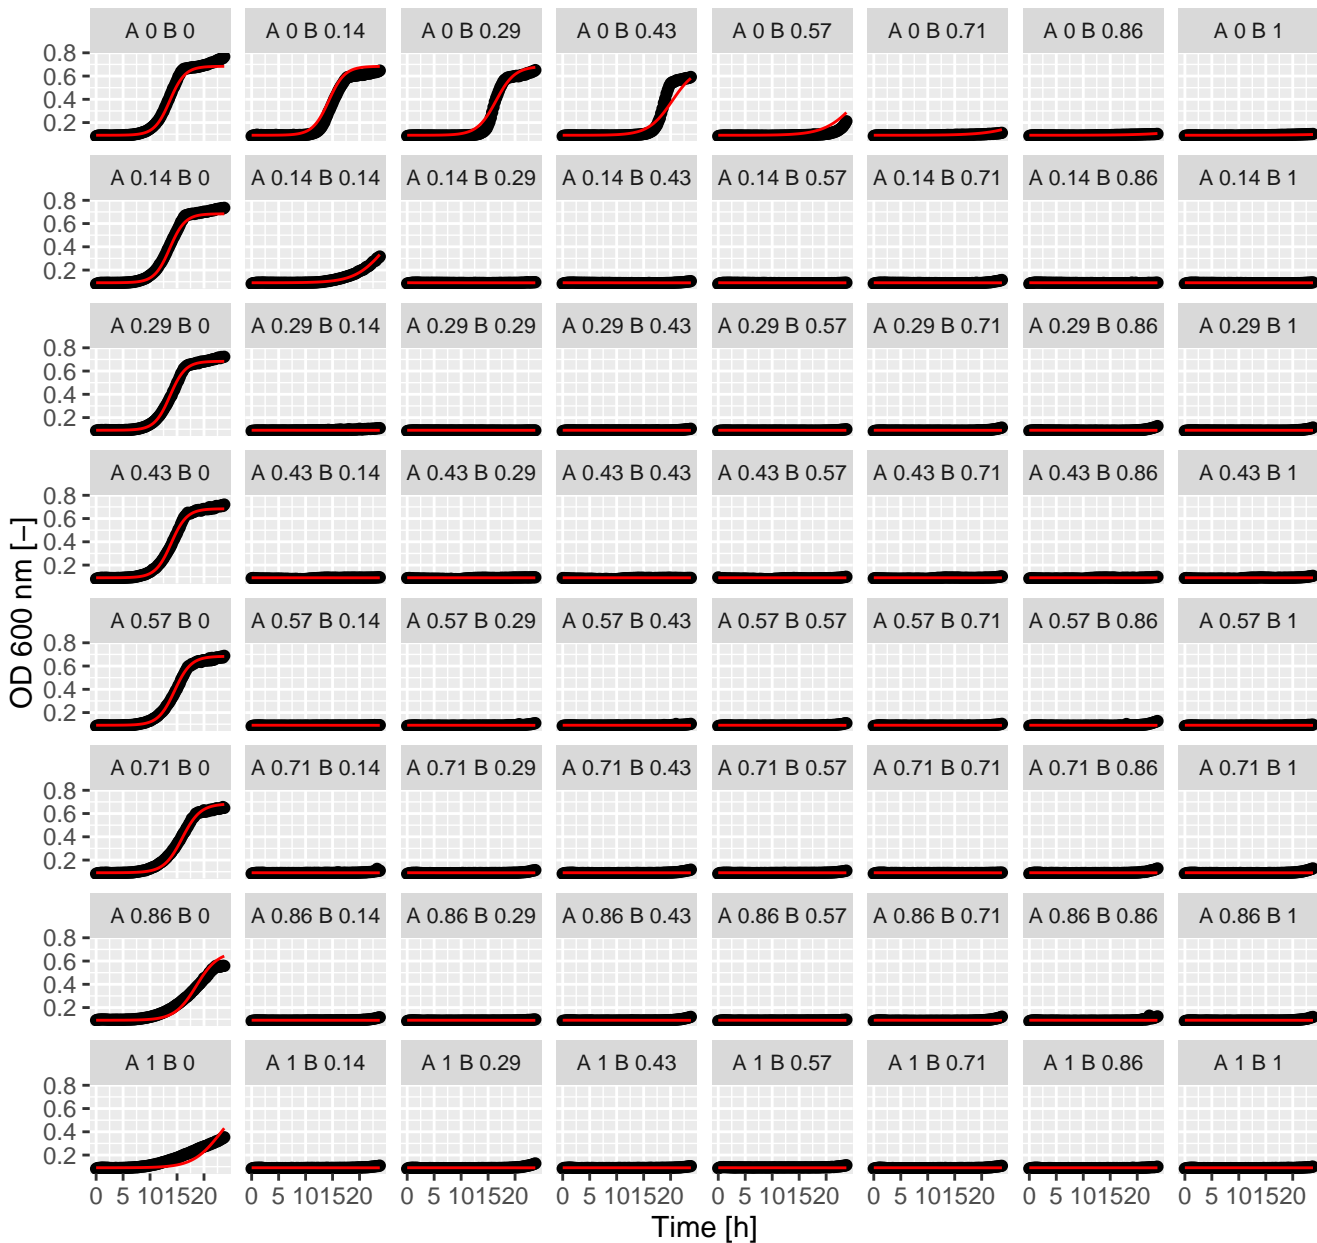

Cal.Hal (= Ax.Bx) Emp. Bliss  
beta = -664781.2

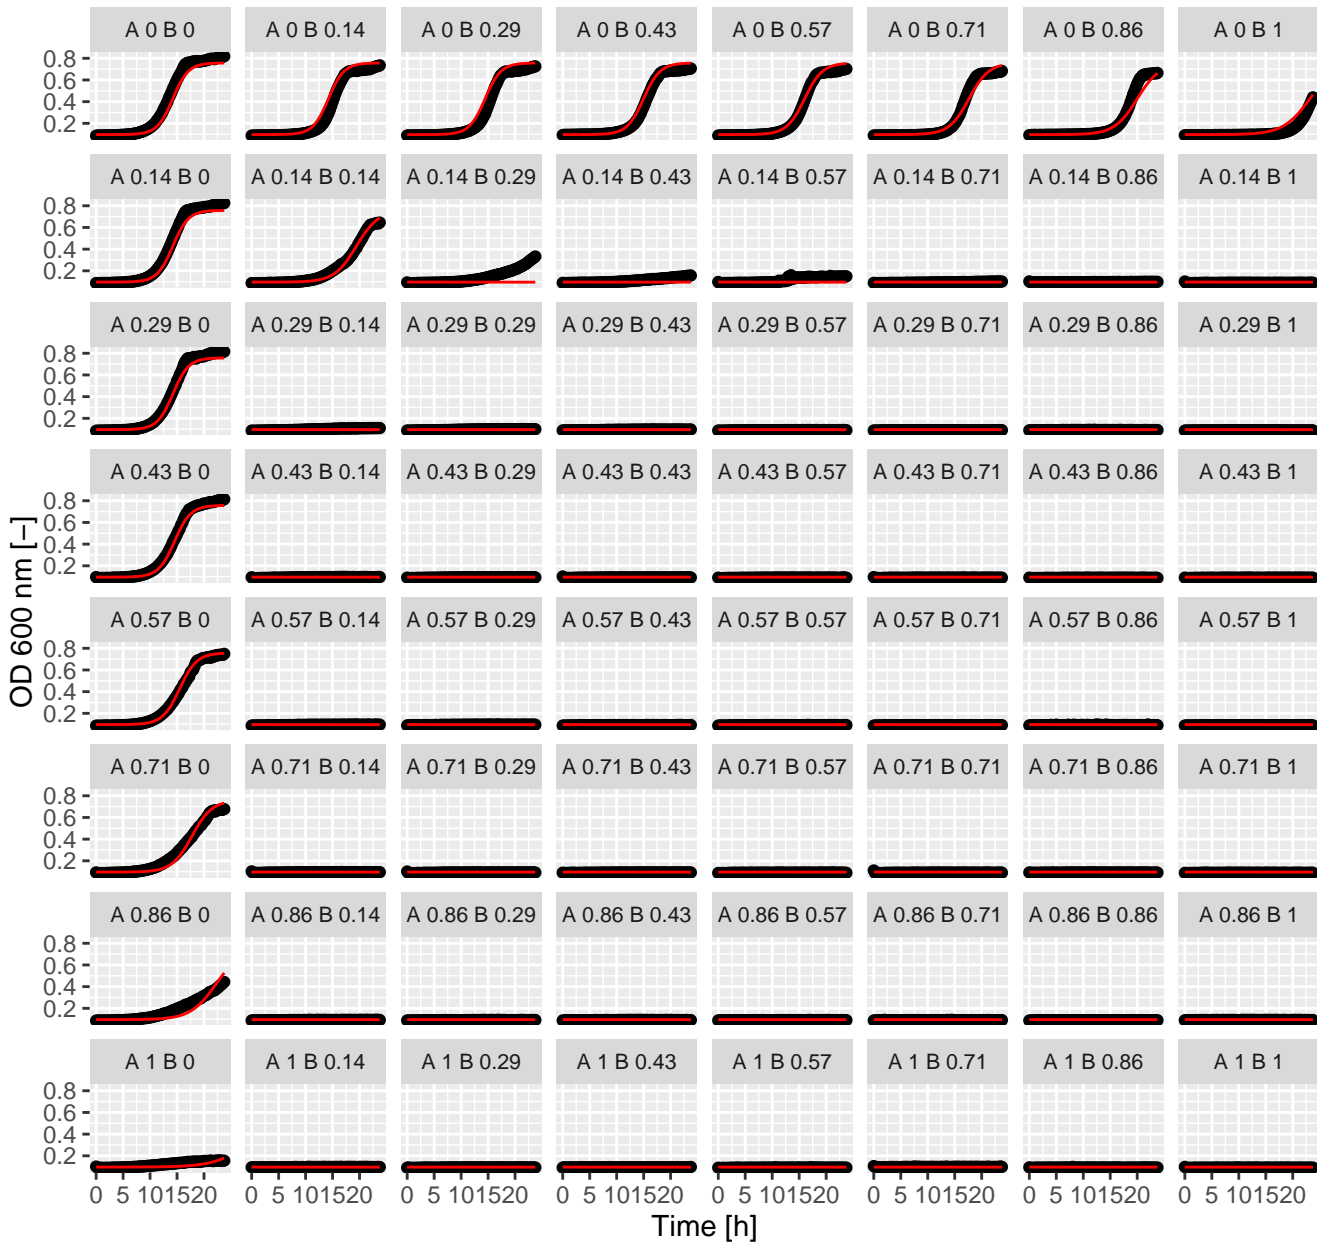

Cal.Lat (= Ax.Bx) Emp. Bliss  
beta = -36.95

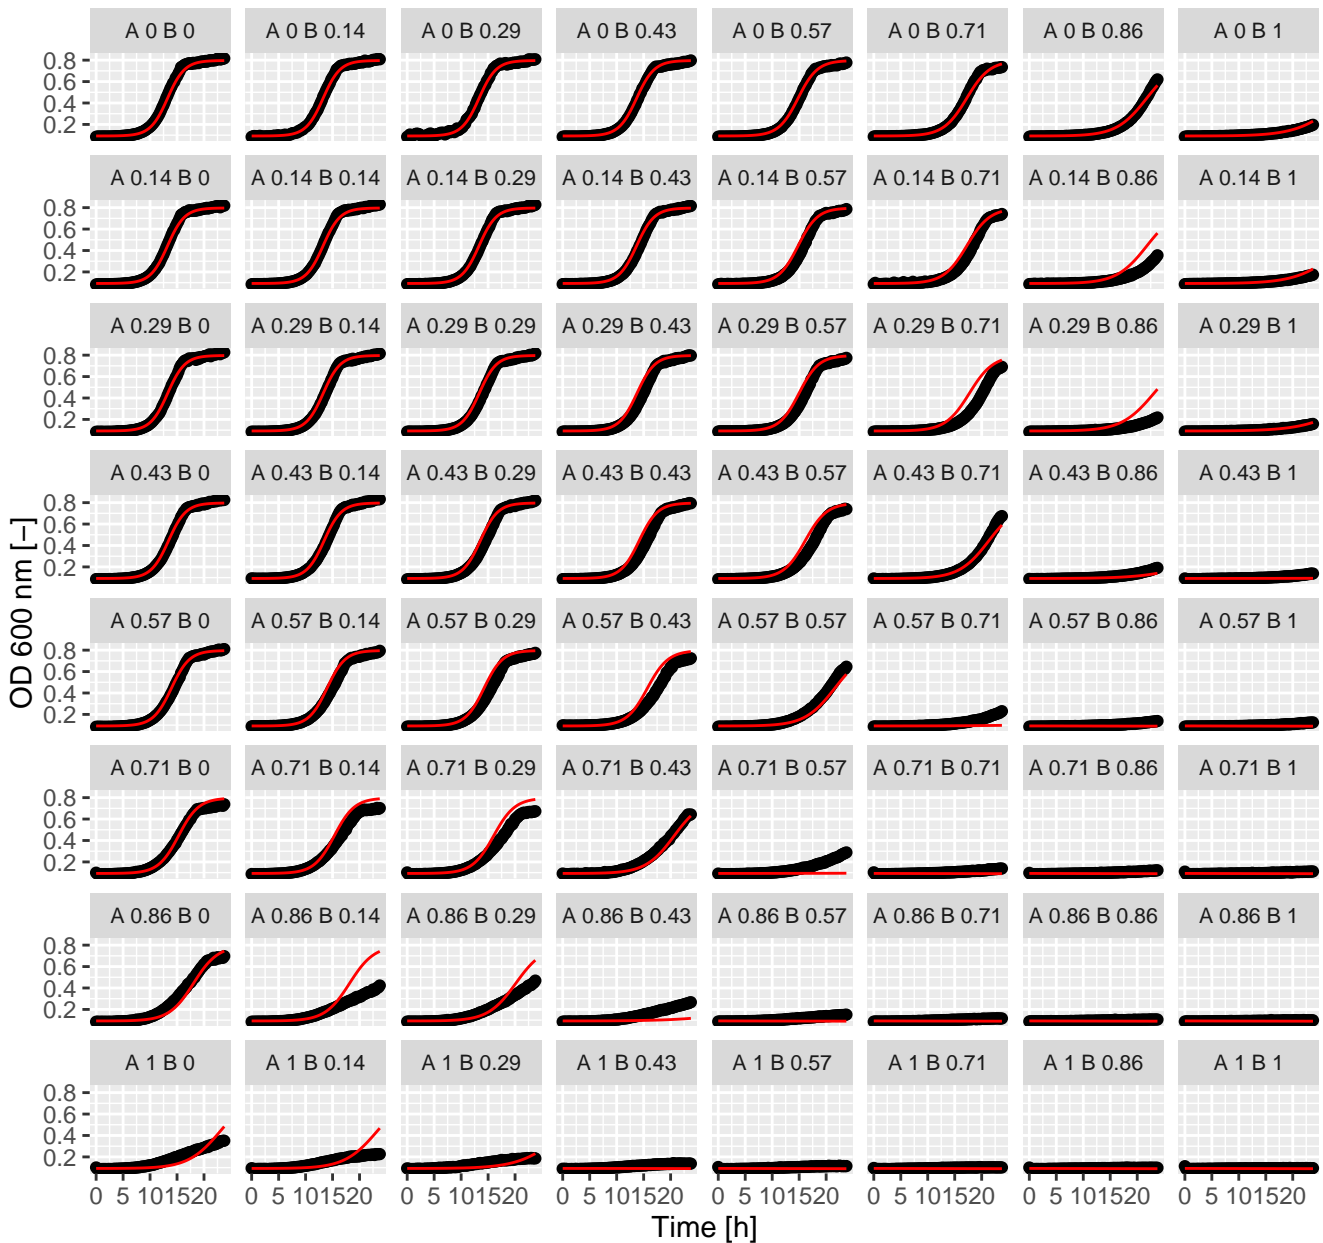

Cal.Pen (= Ax.Bx) Emp. Bliss  
beta = -876.8

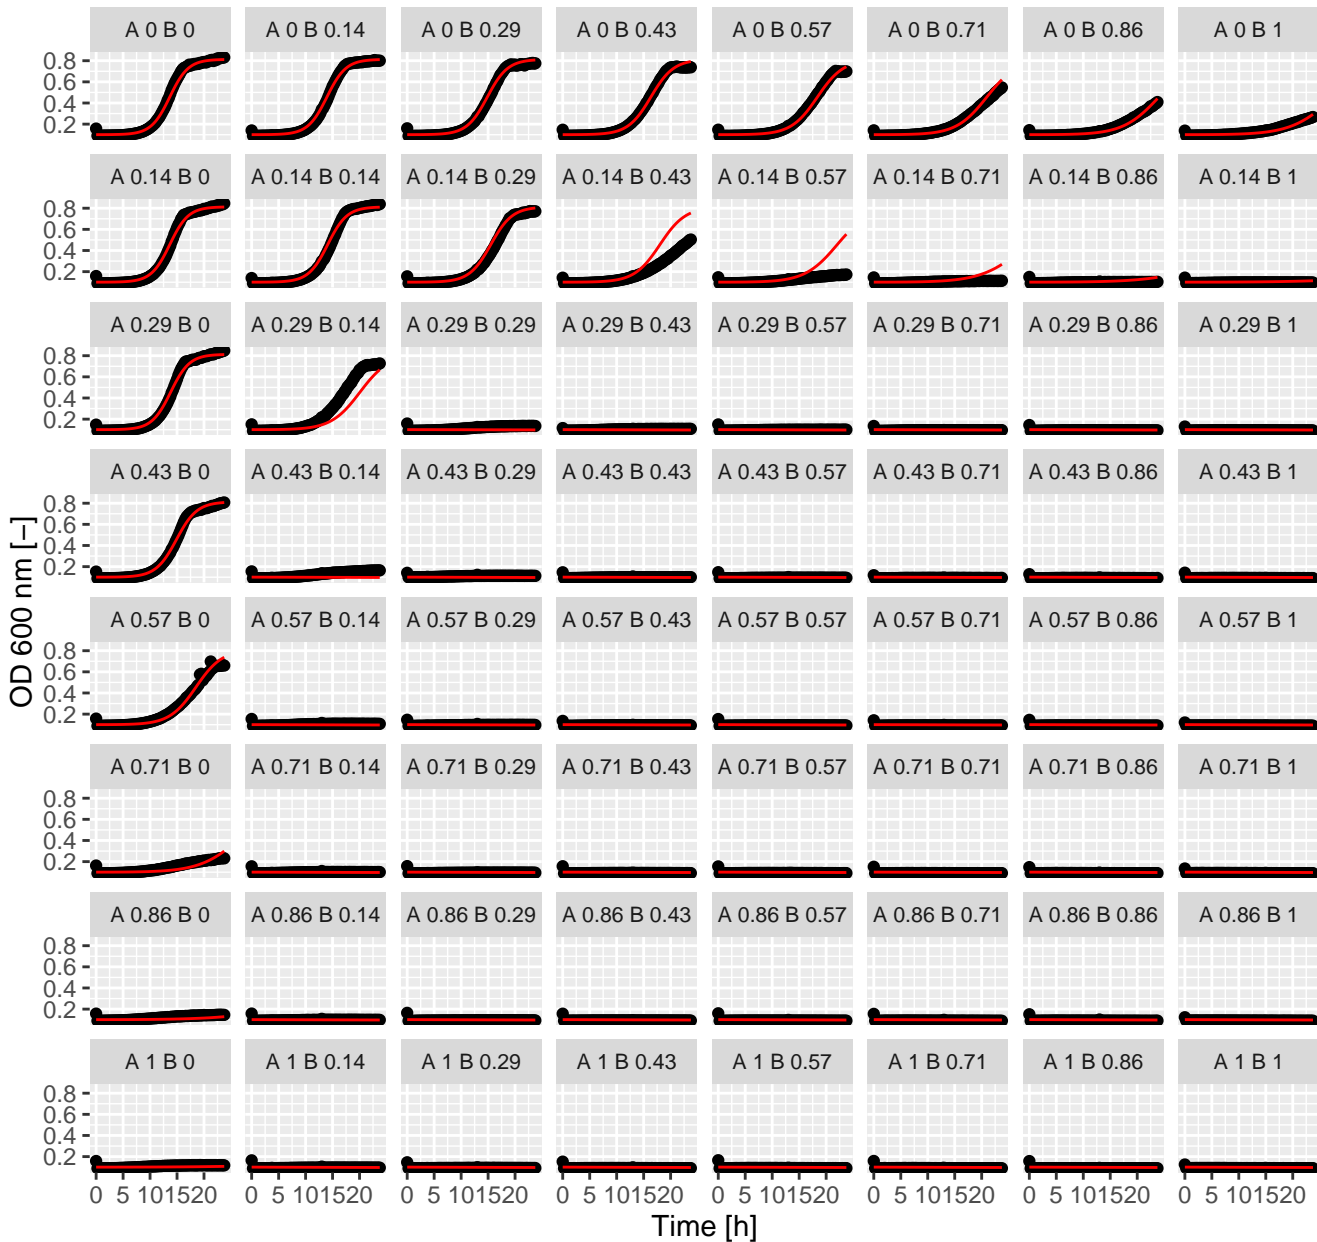

Cal.Rap (= Ax.Bx) Emp. Bliss  
beta = 0.41

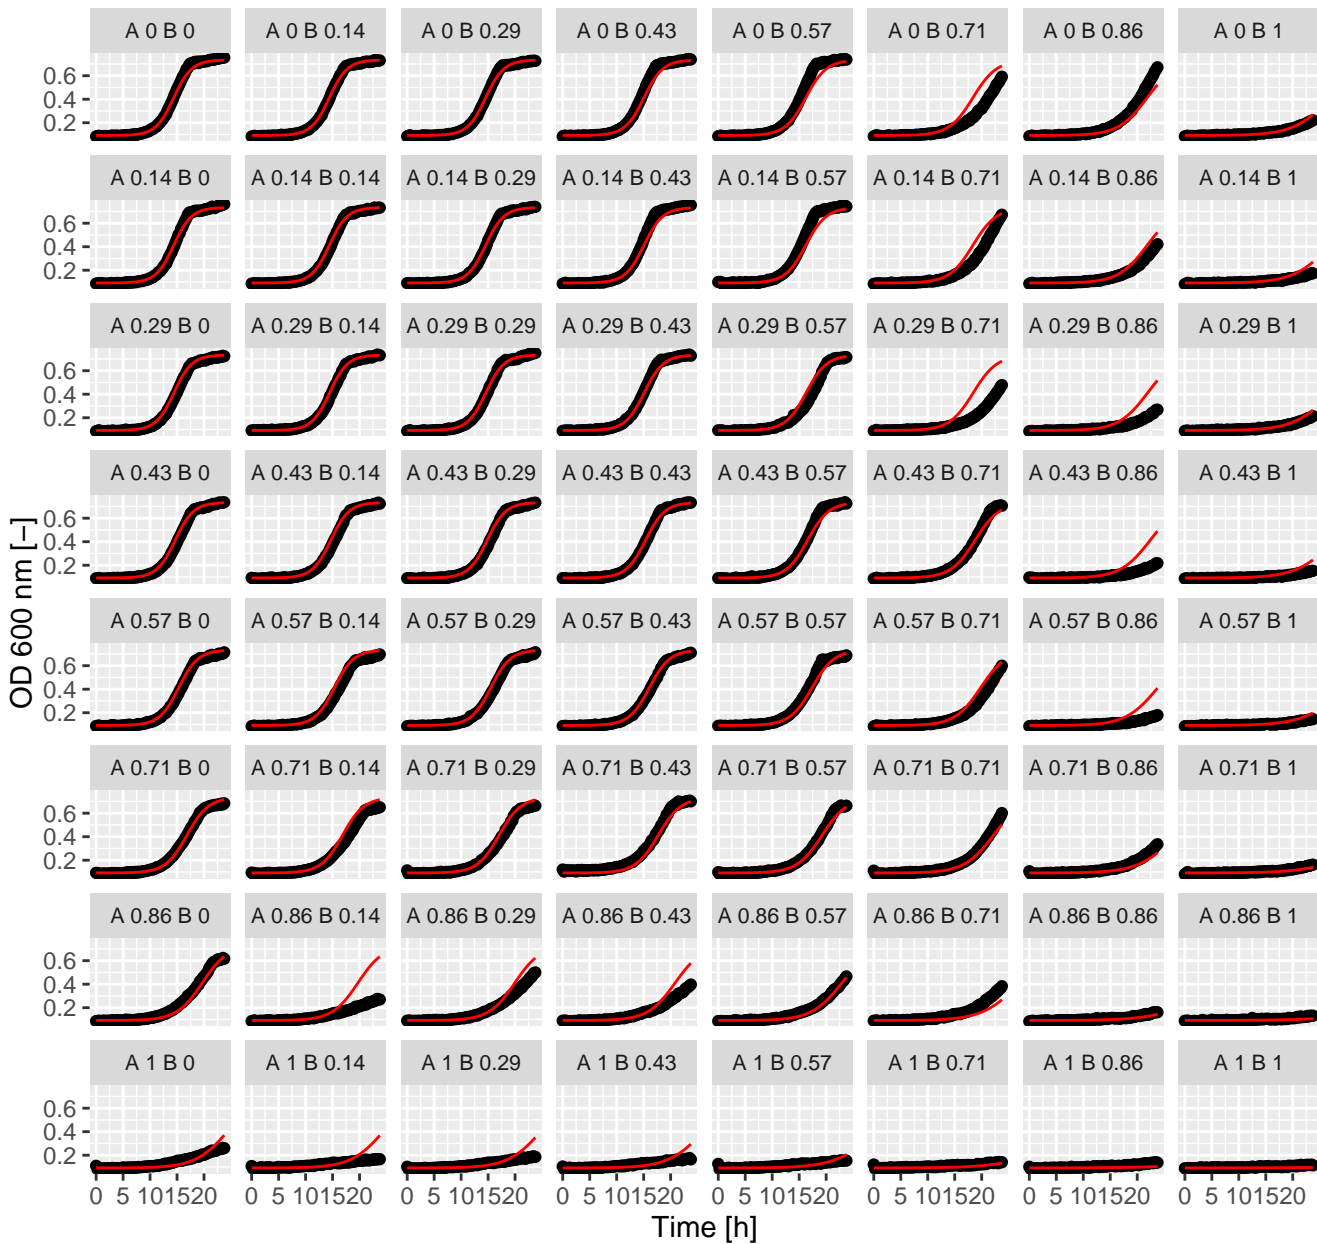

Cal.Sta (= Ax.Bx) Emp. Bliss  
beta = 0.94

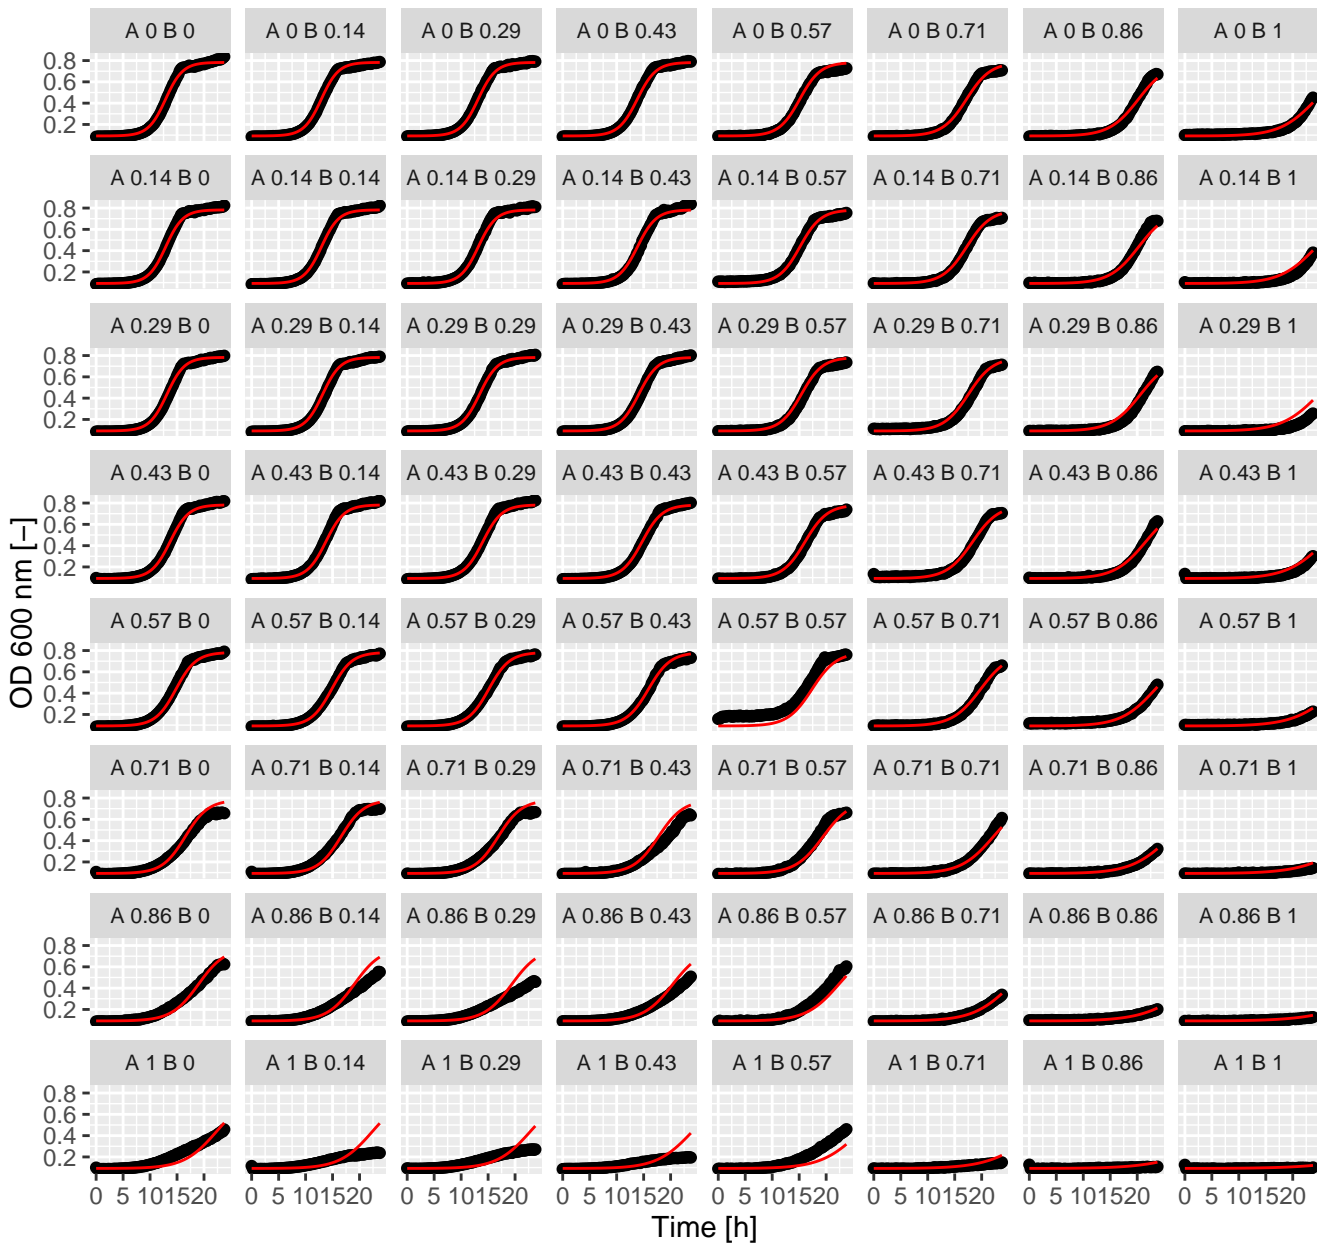

## Cal.Tac (= Ax.Bx) Emp. Bliss

beta = -118.55

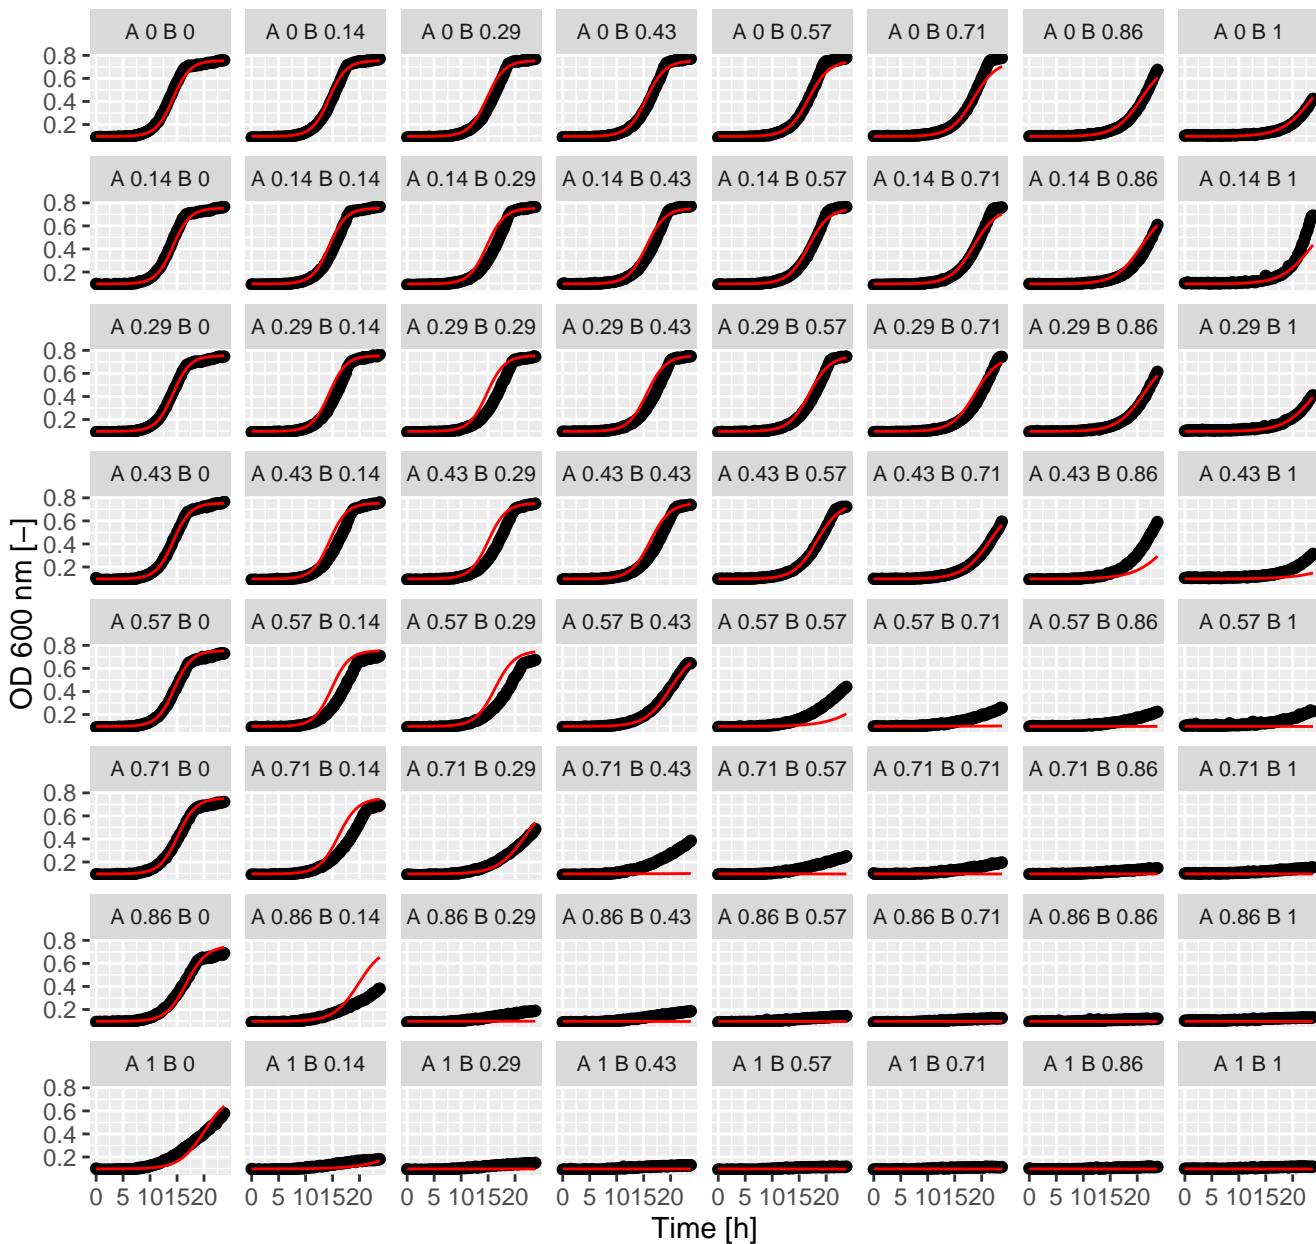

Cal.Ter (= Ax.Bx) Emp. Bliss  
beta = -2051.6

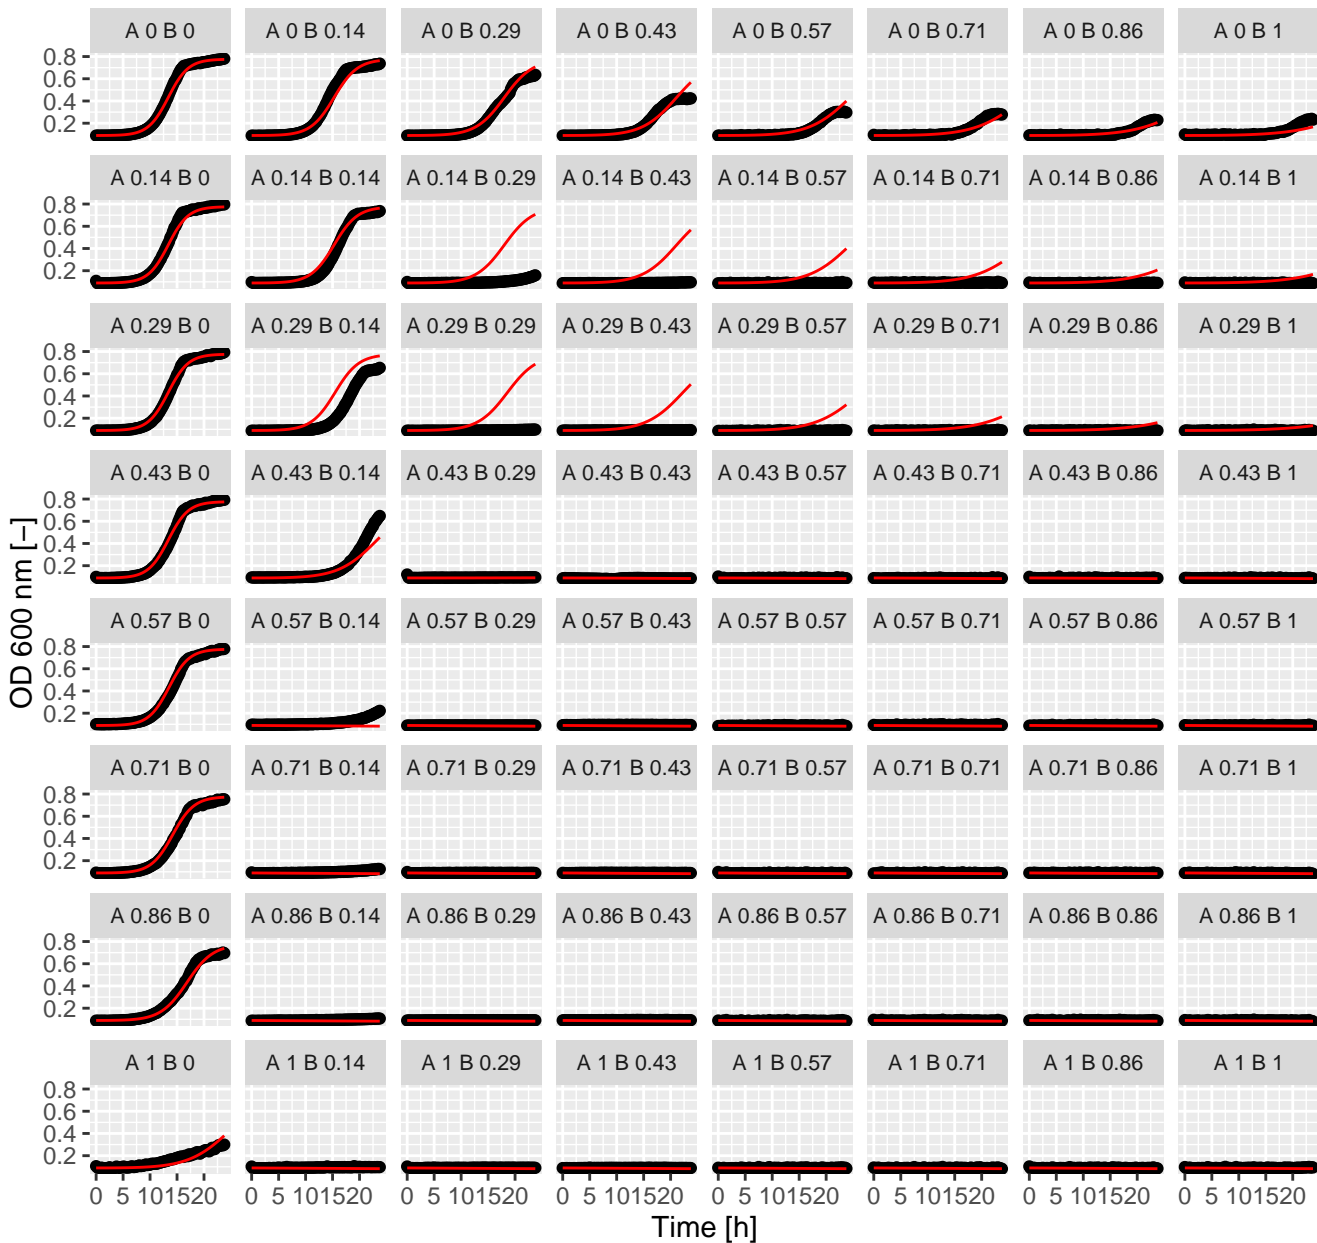



Cal.Tun (= Ax.Bx) Emp. Bliss  
beta = -55.3

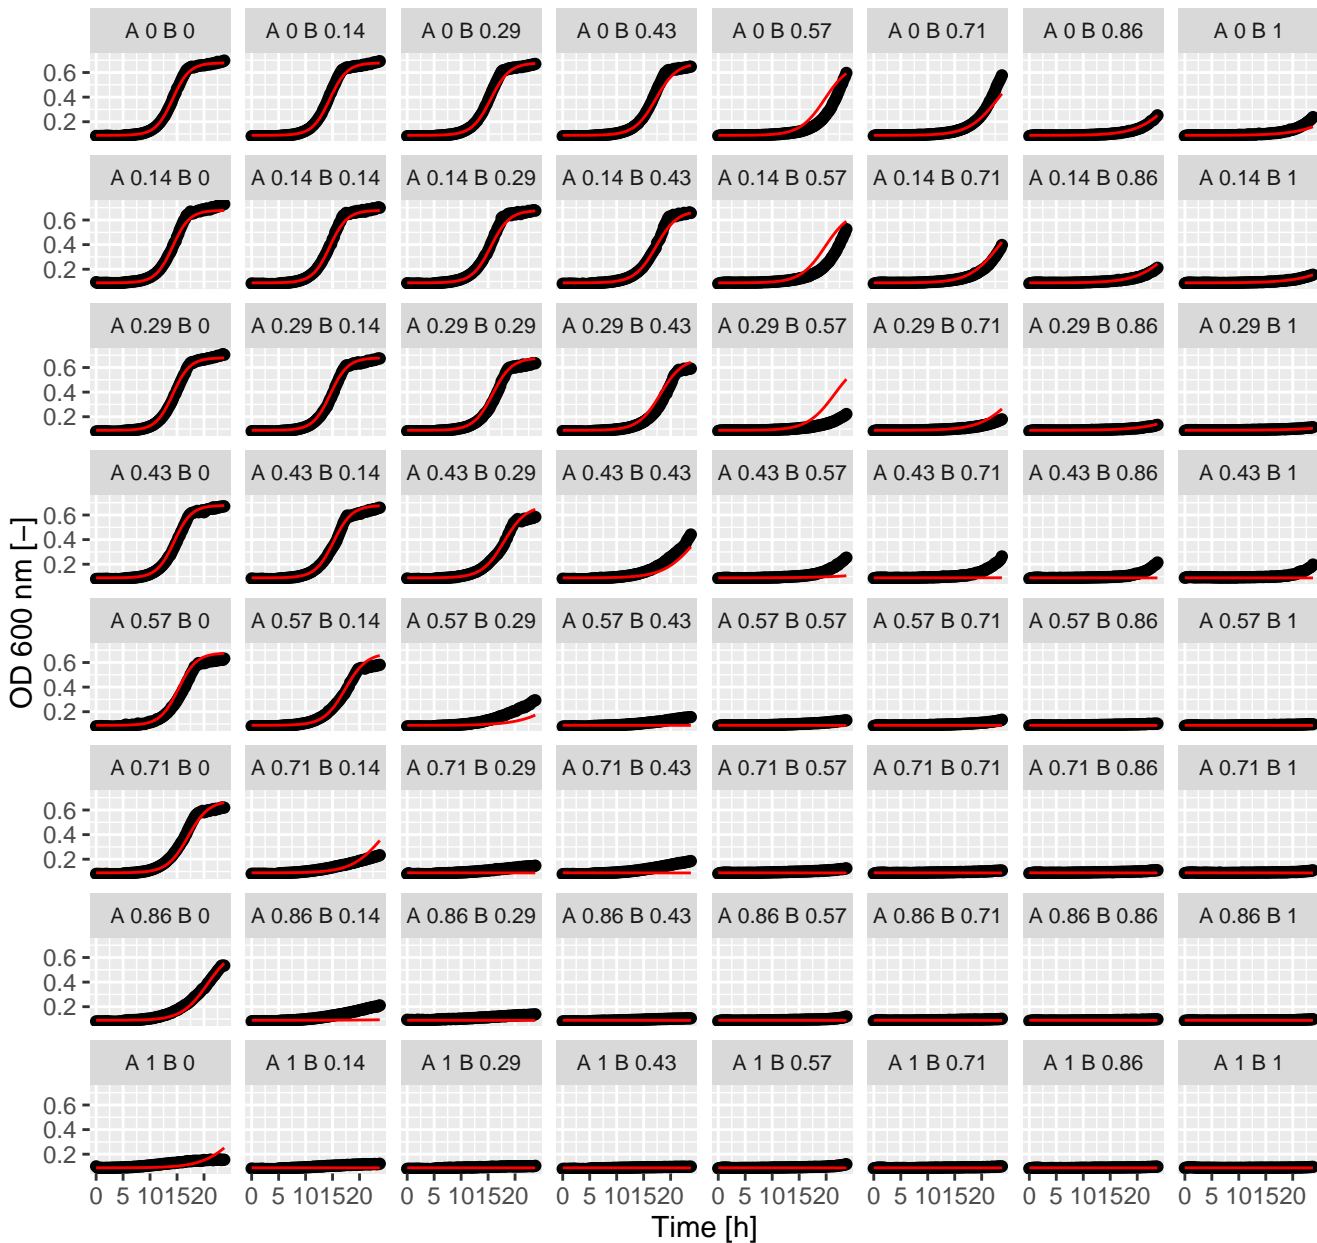

Can.Can (= Ax.Bx) Emp. Bliss  
beta = -0.15

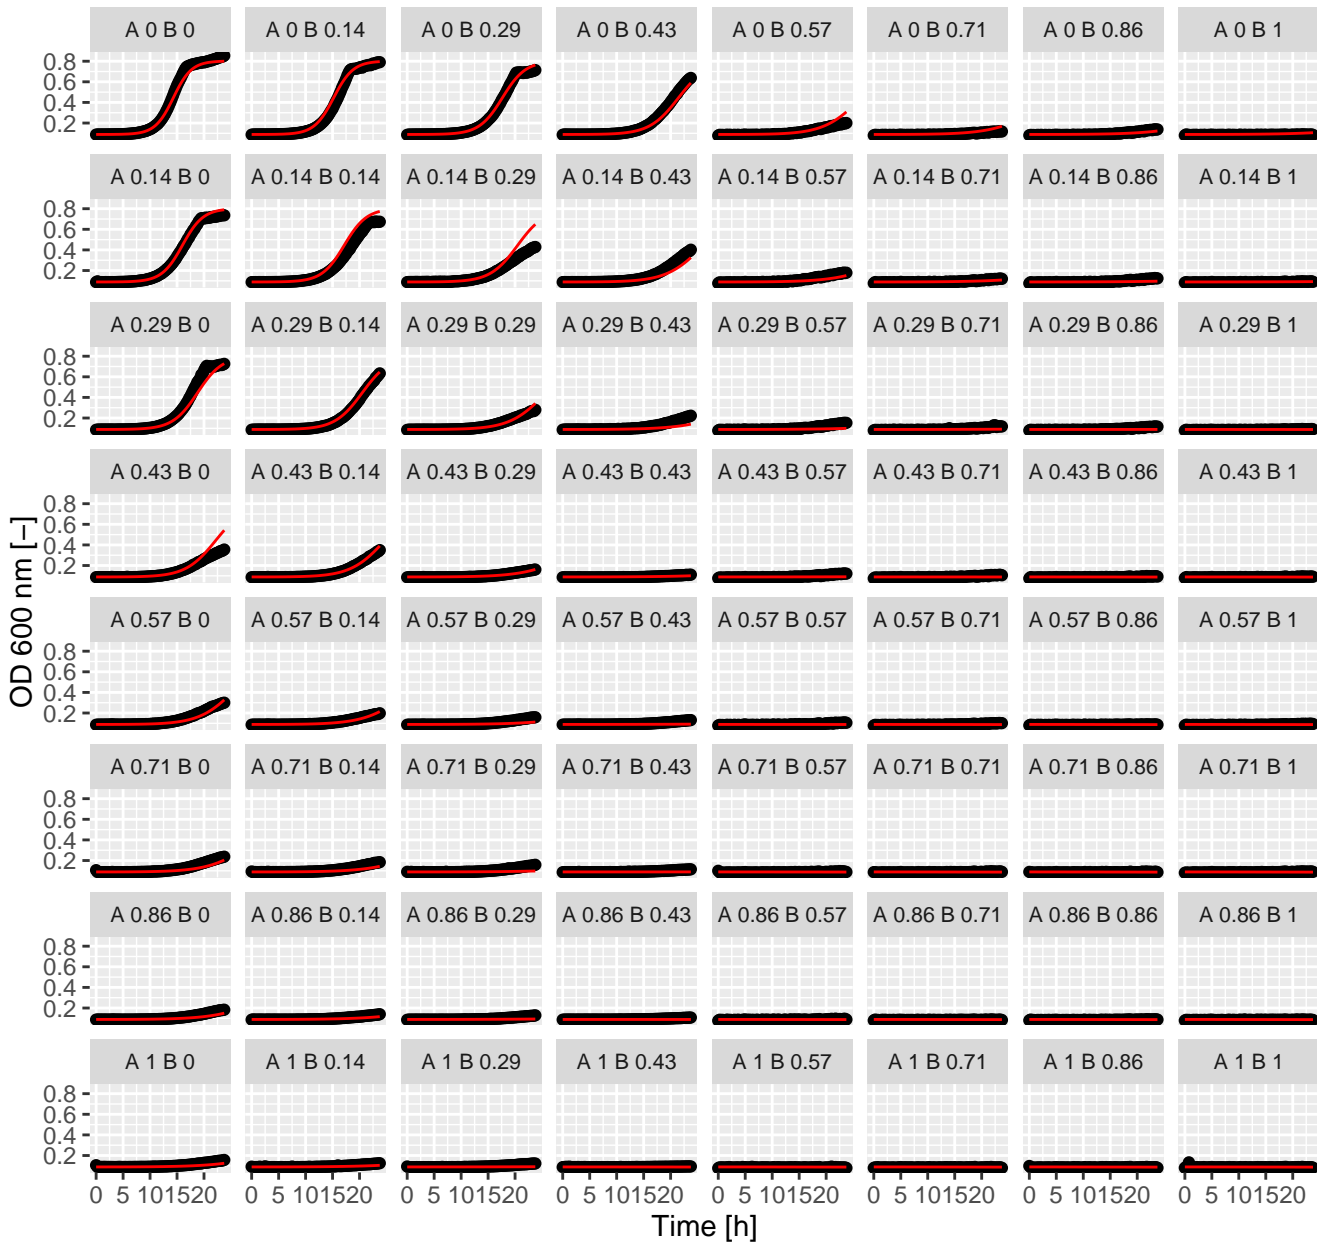

Can.Lat (= Ax.Bx) Emp. Bliss  
beta = 1.66

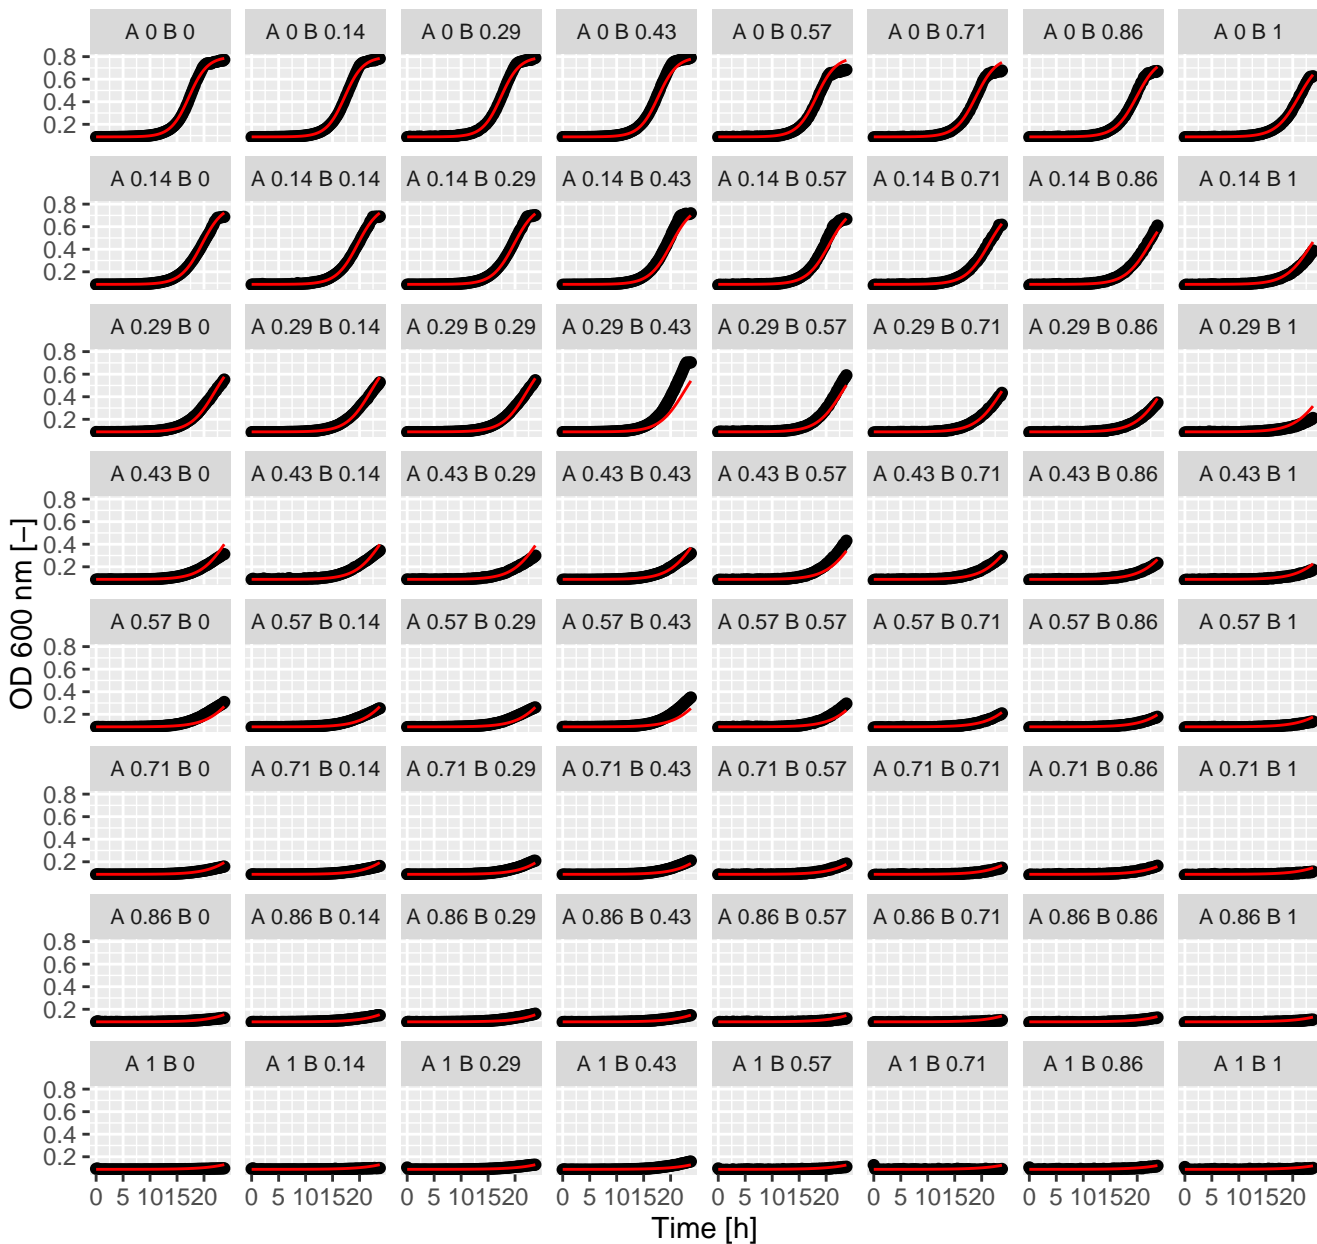

Can.Pen (= Ax.Bx) Emp. Bliss  
beta = 0.16

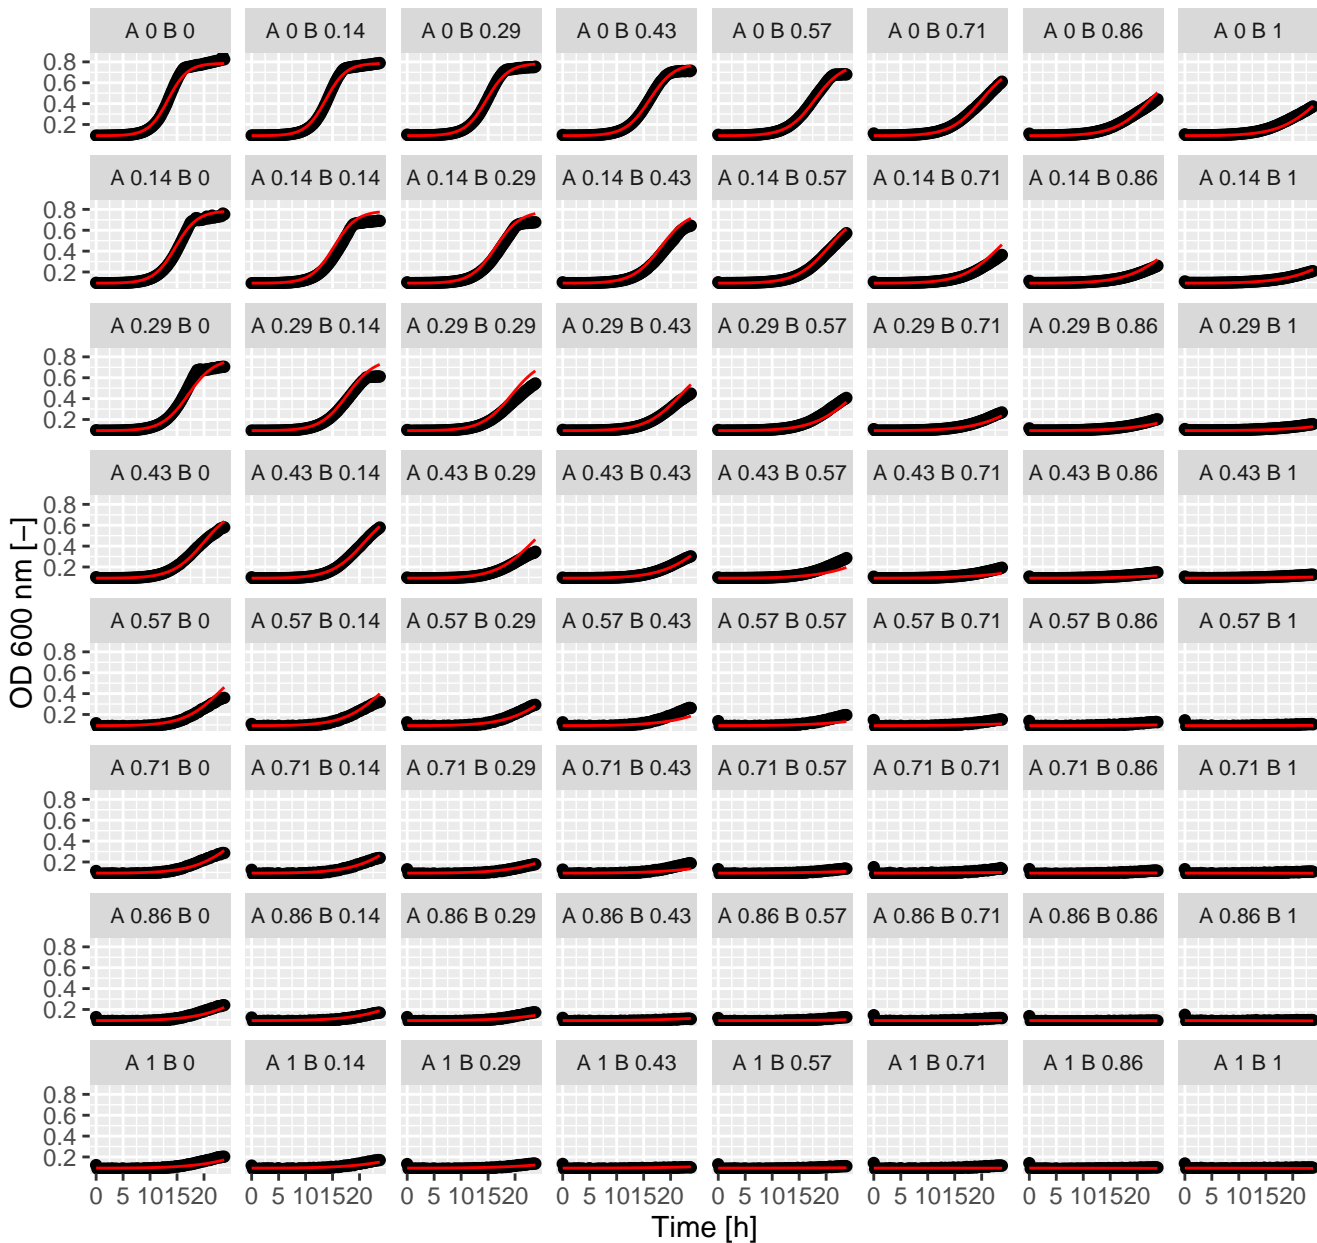

Can.Sta (= Ax.Bx) Emp. Bliss  
beta = 2.24

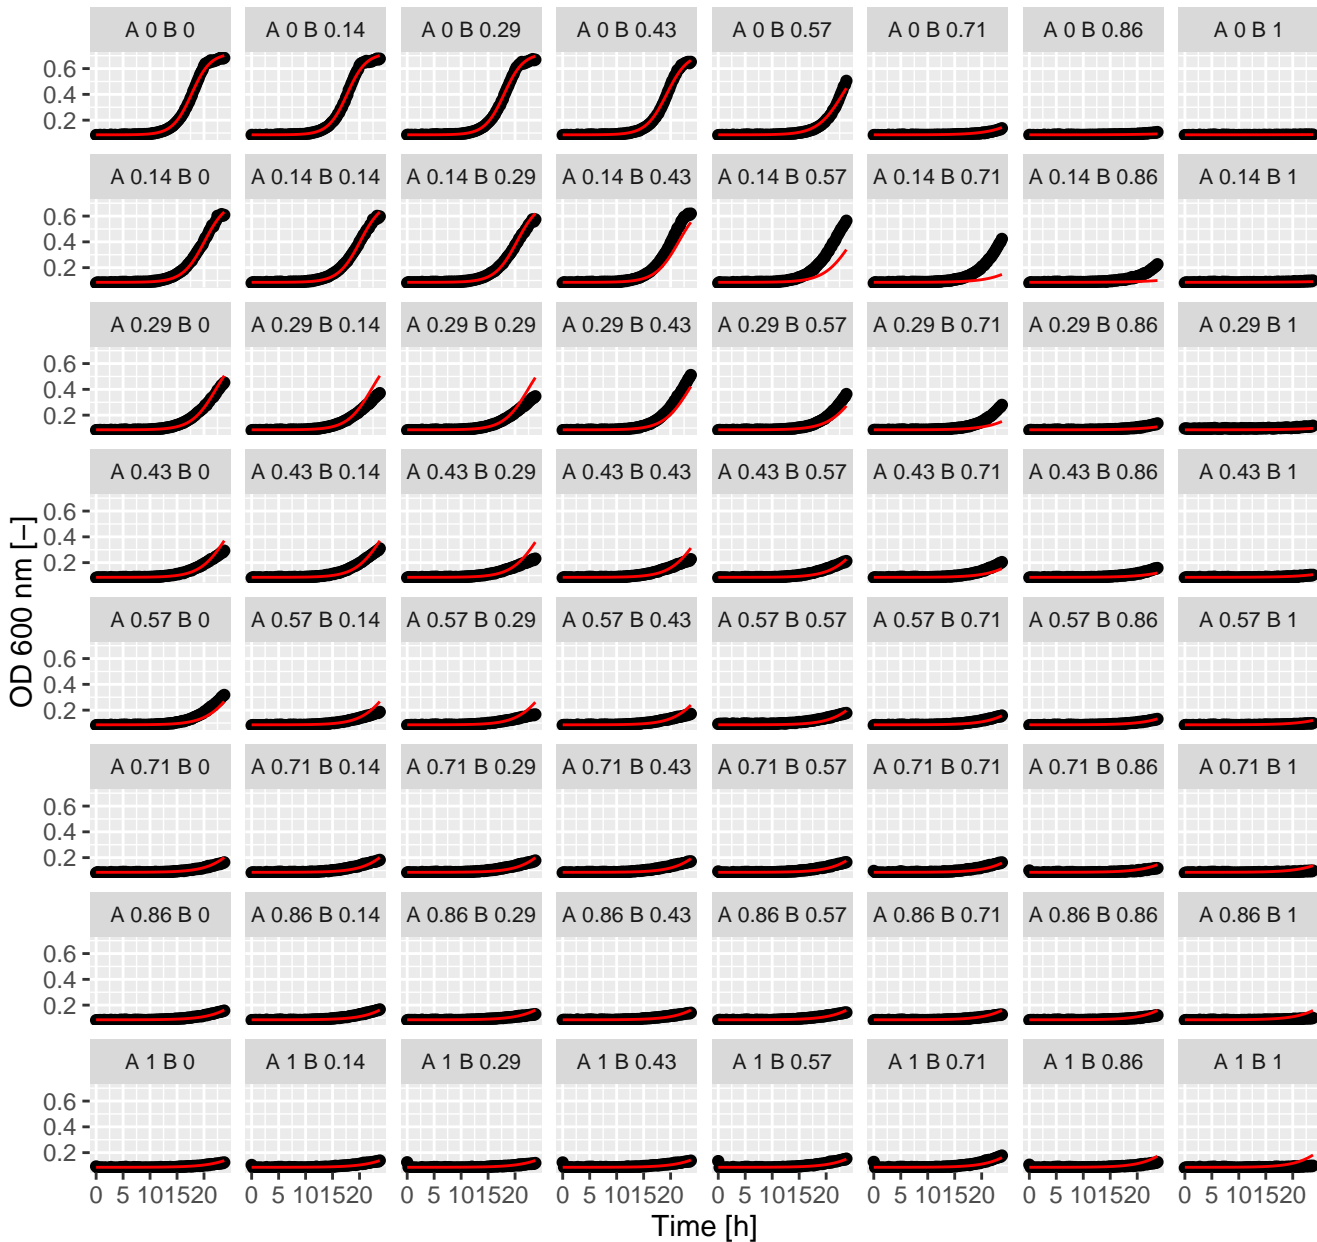

Can.Tac (= Ax.Bx) Emp. Bliss  
beta = -2.14

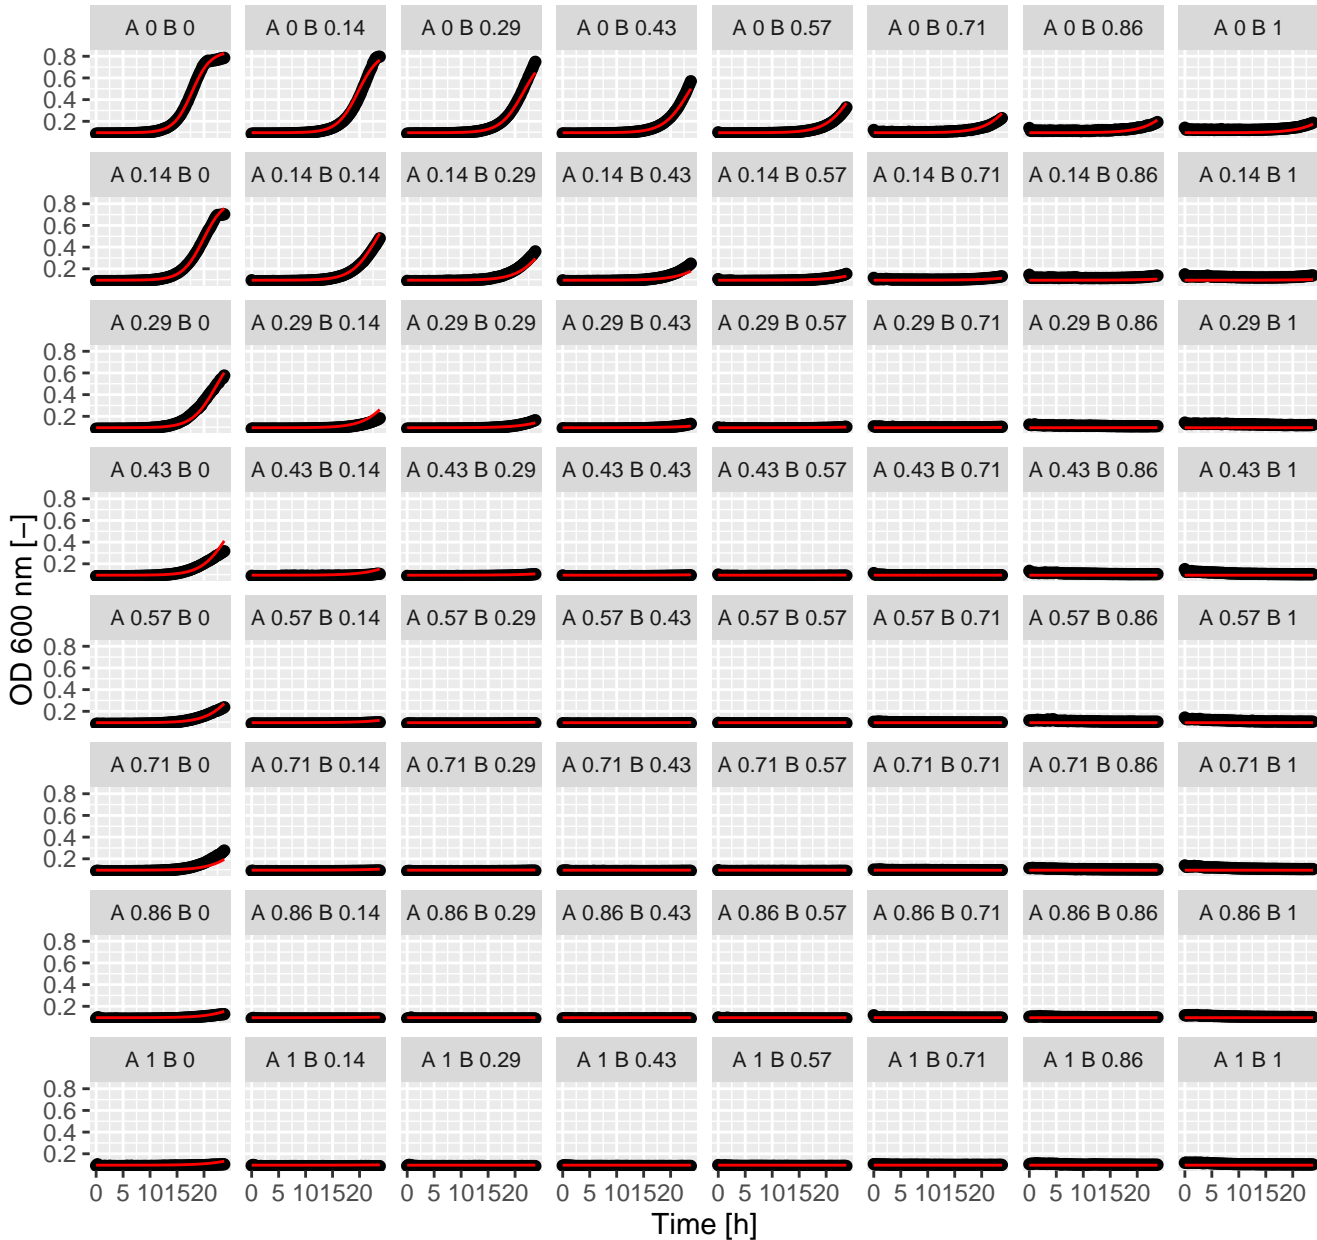

Can.Ter (= Ax.Bx) Emp. Bliss  
beta = 1.22

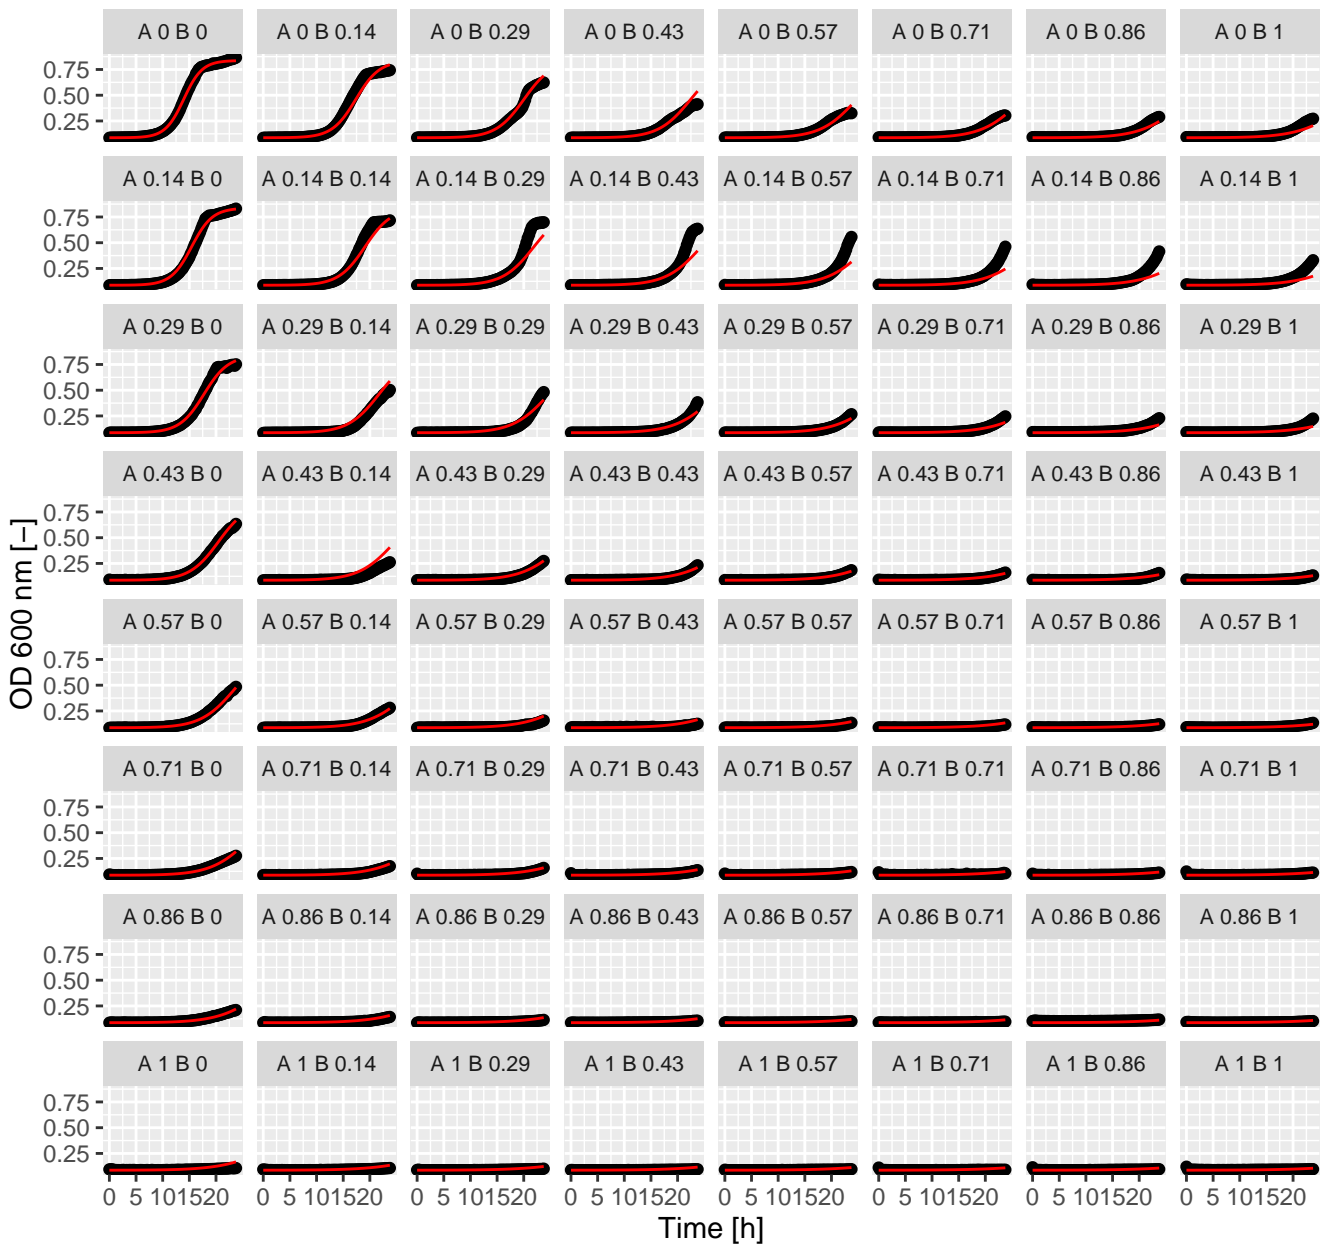

Chl.Chl (= Ax.Bx) Emp. Bliss  
beta = -0.61

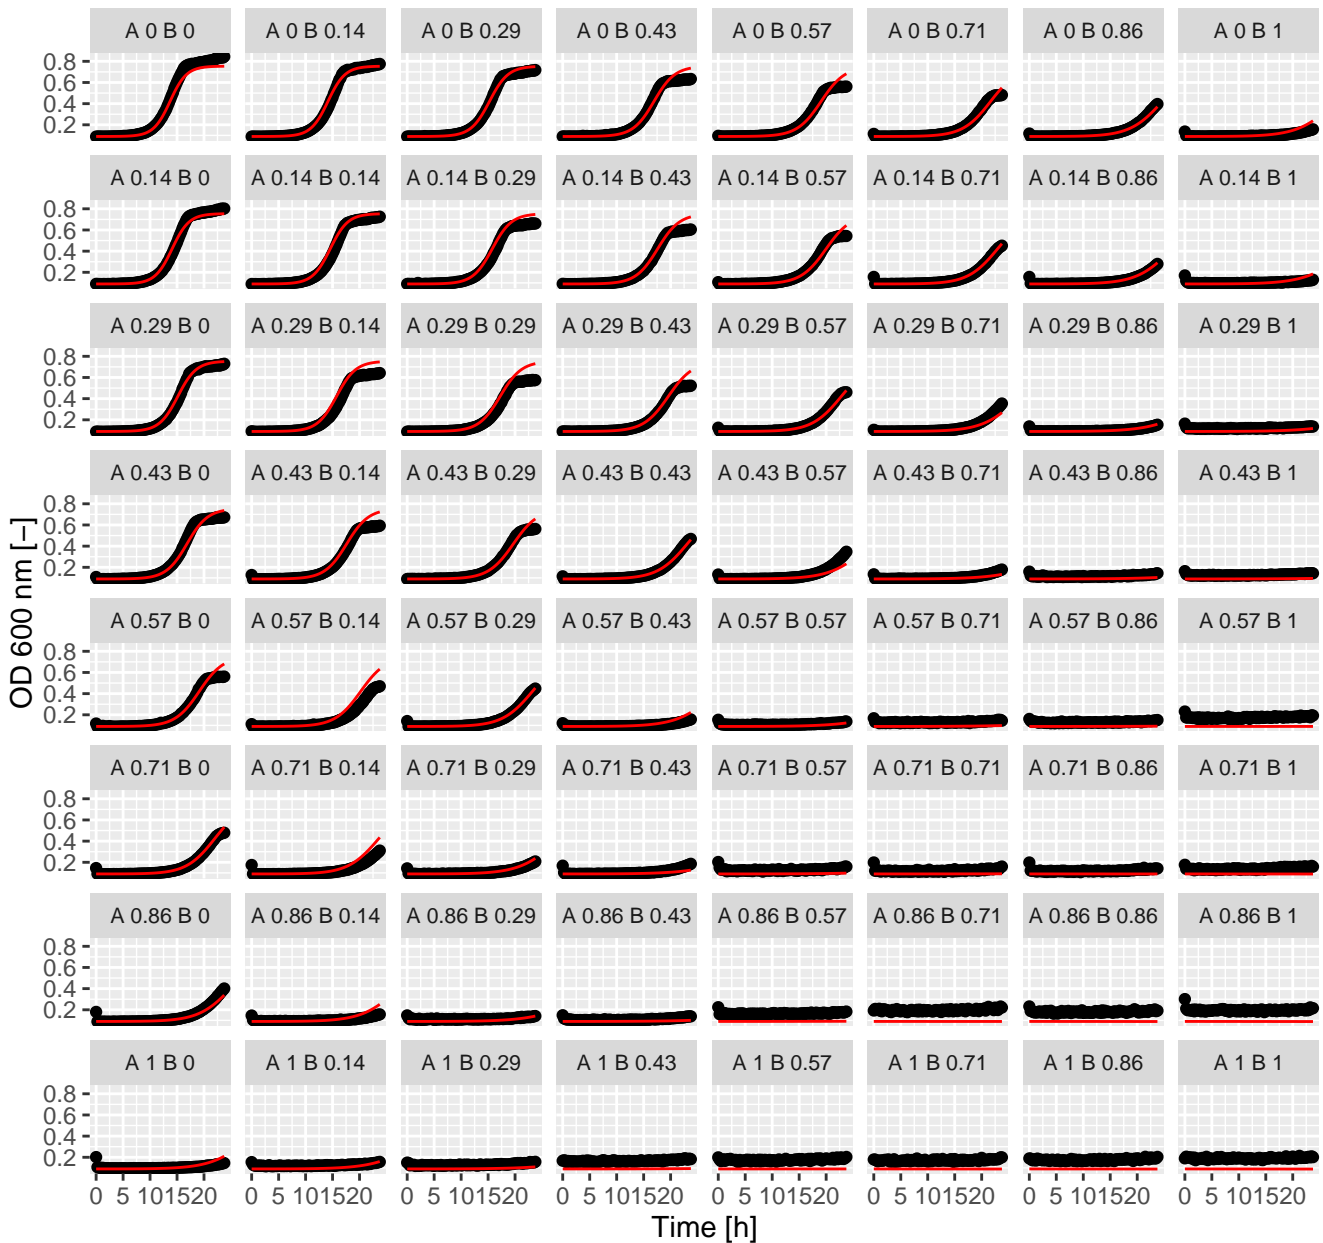



Chl.Lat (= Ax.Bx) Emp. Bliss  
beta = 1.92

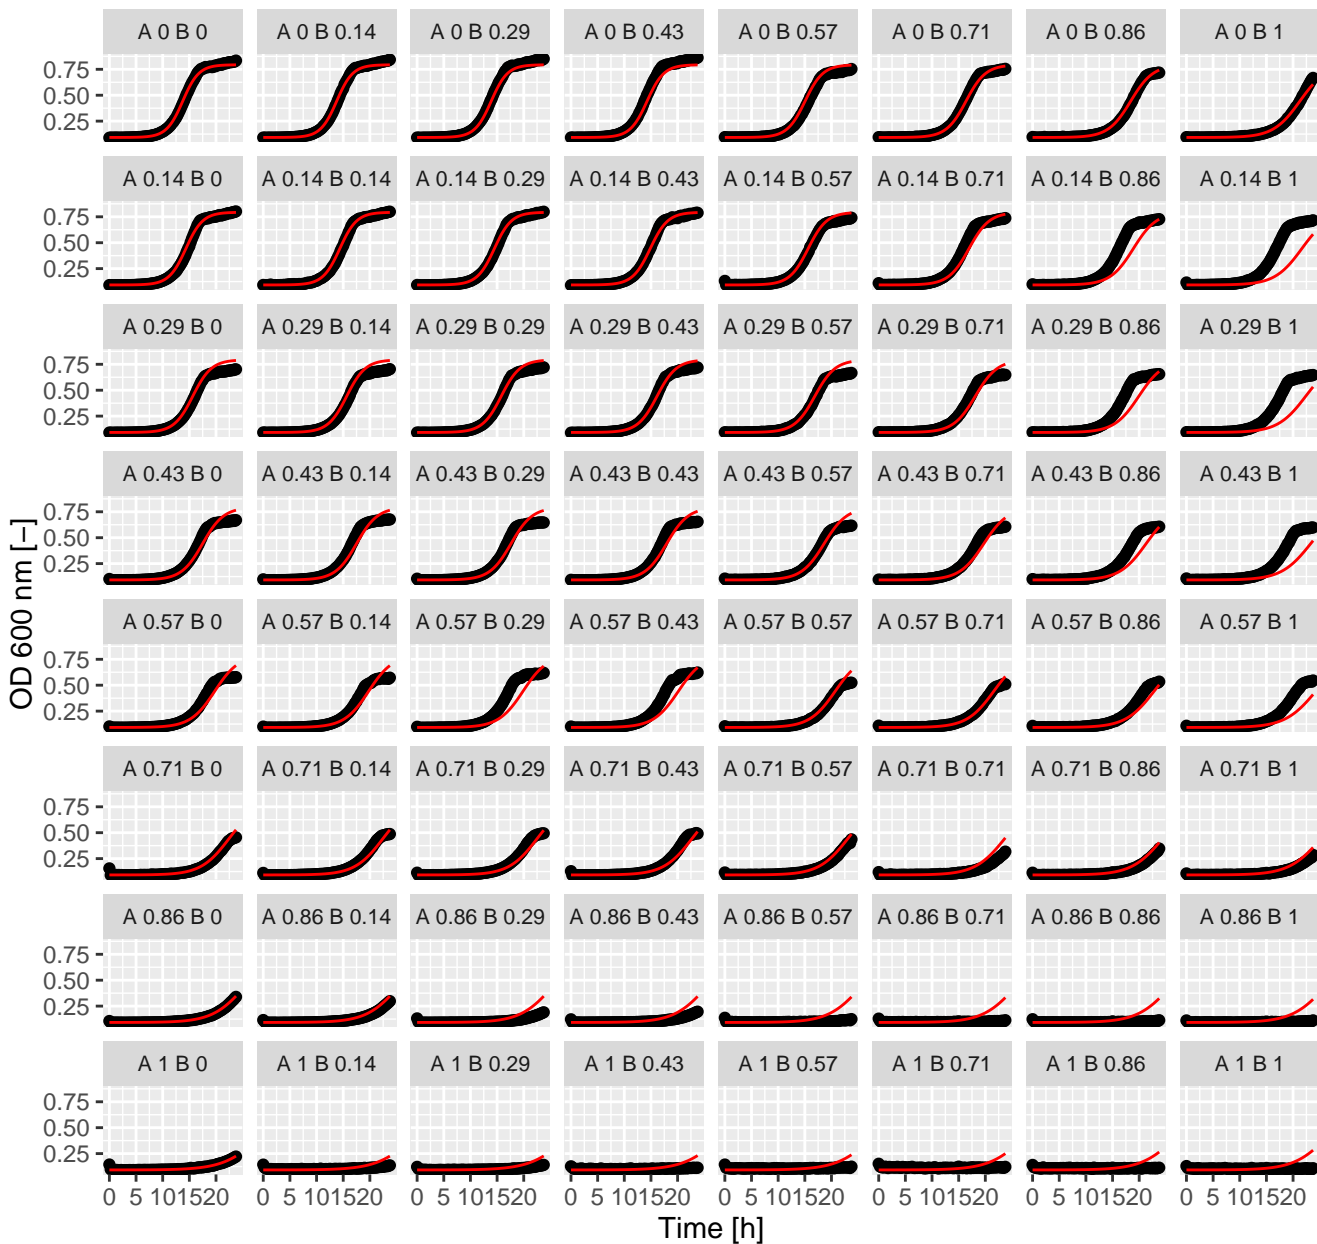

# Chl.Pen (= Ax.Bx) Emp. Bliss

beta = 0.91

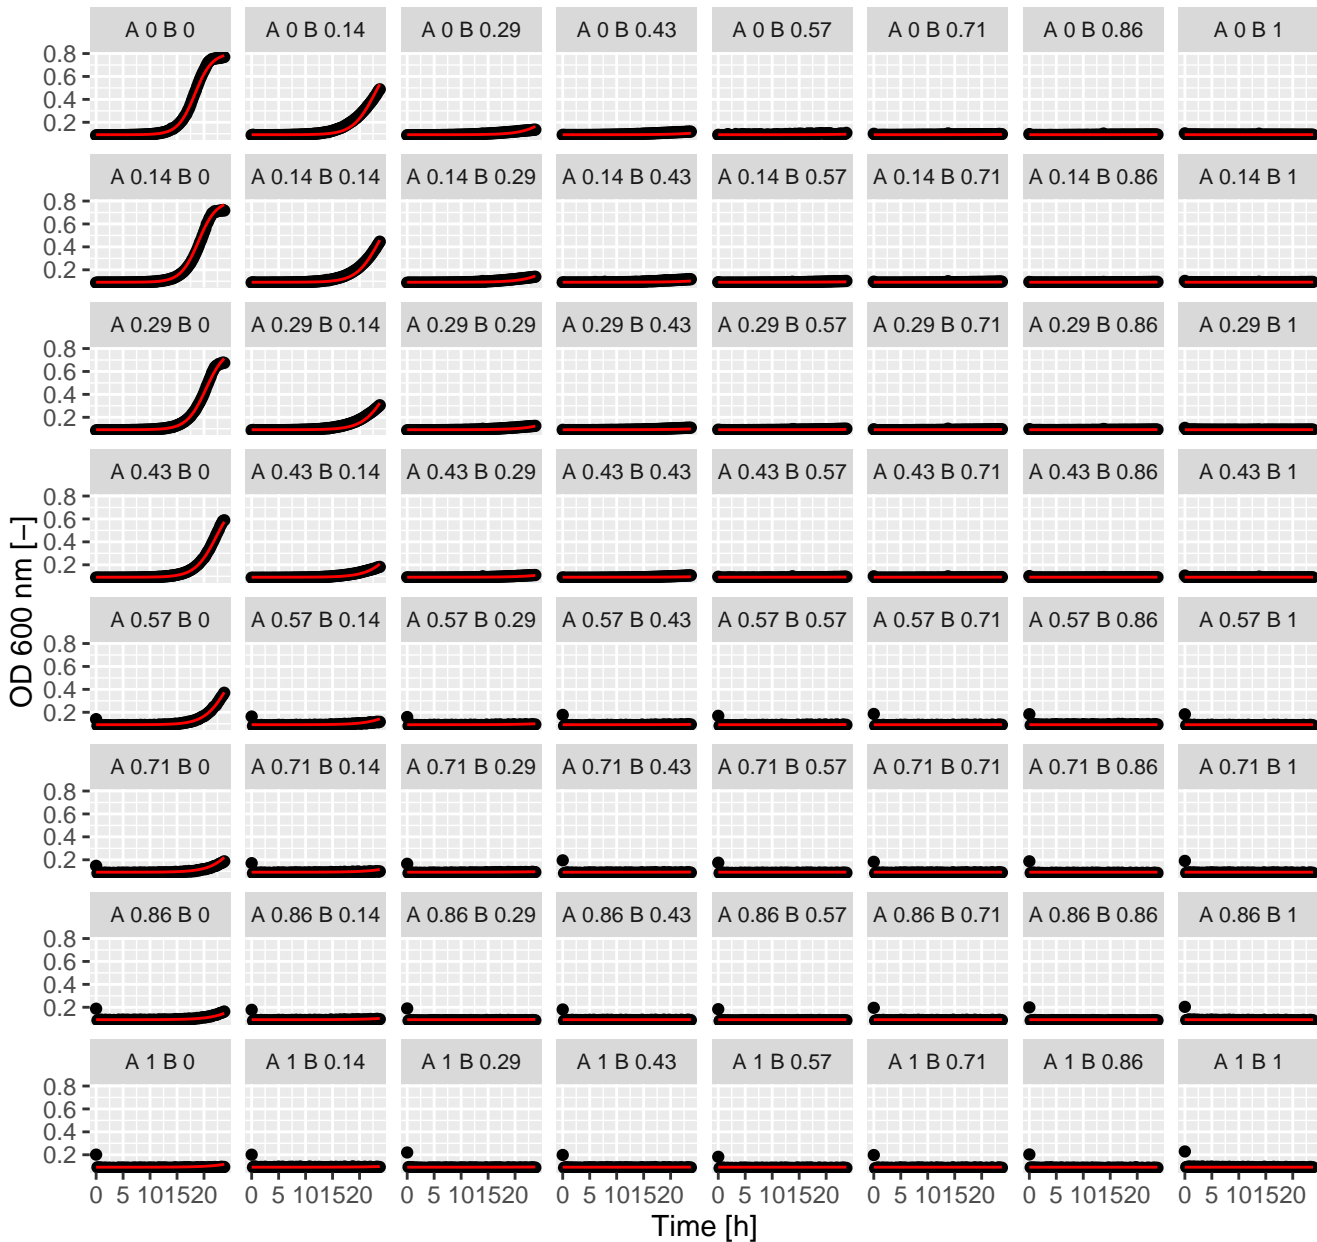

Chl.Sta (= Ax.Bx) Emp. Bliss  
beta = 1.35

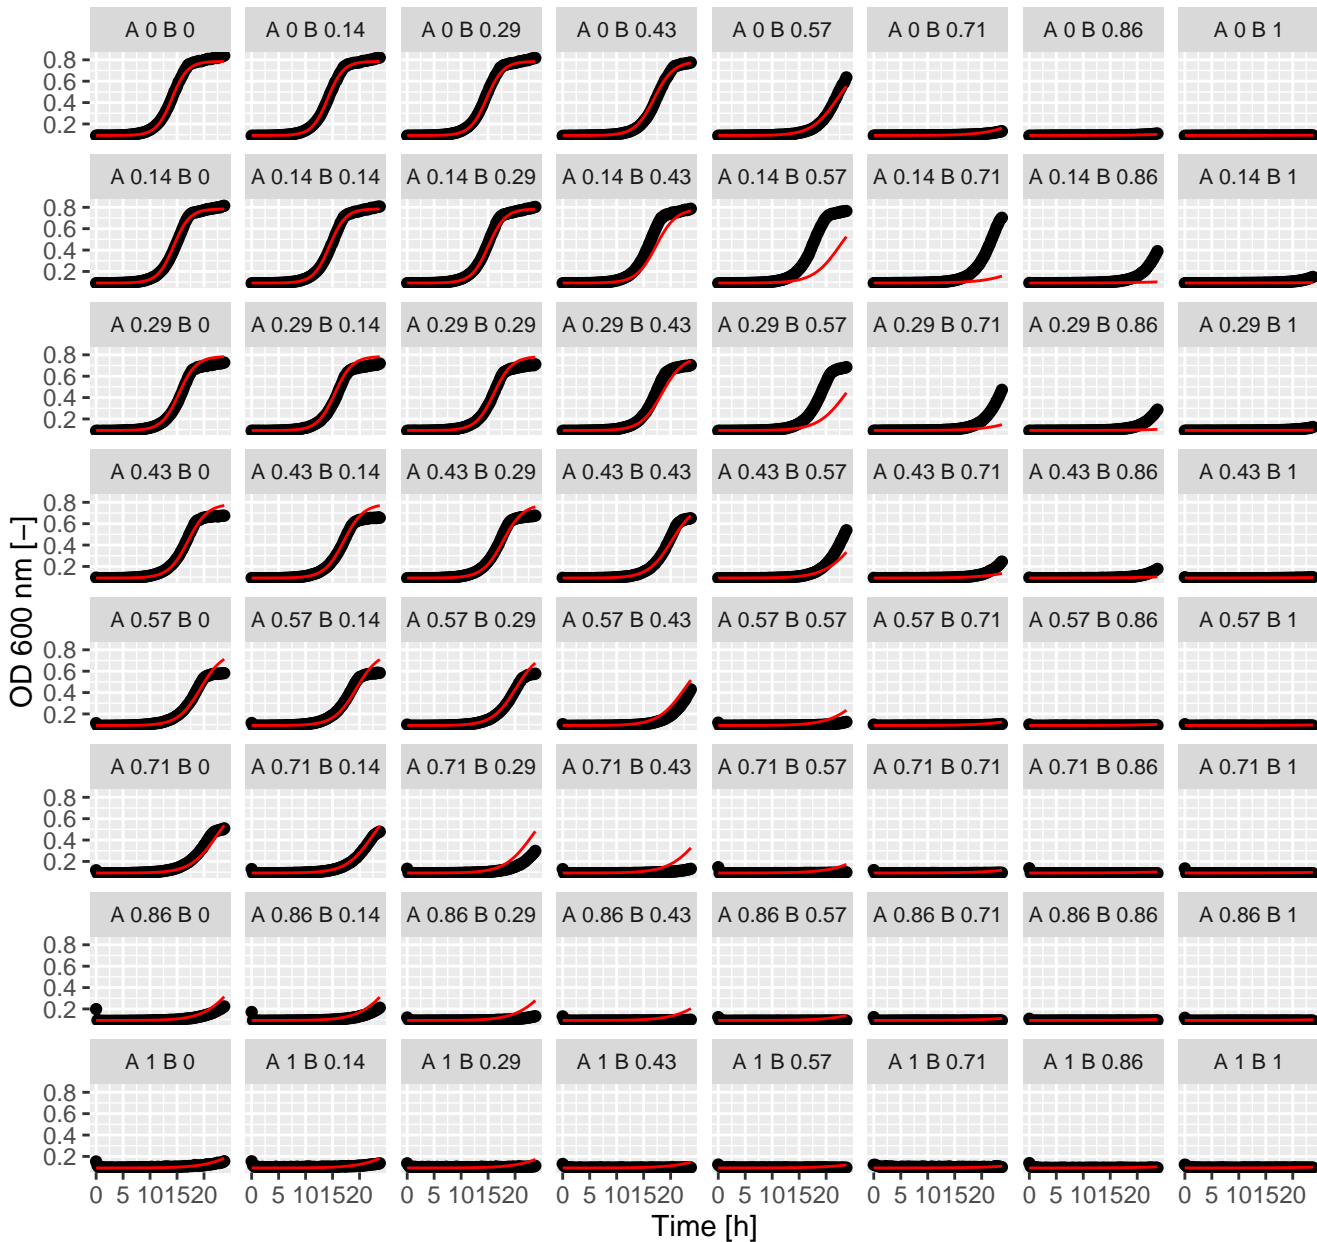

# Chl.Tac (= Ax.Bx) Emp. Bliss beta = 0.59

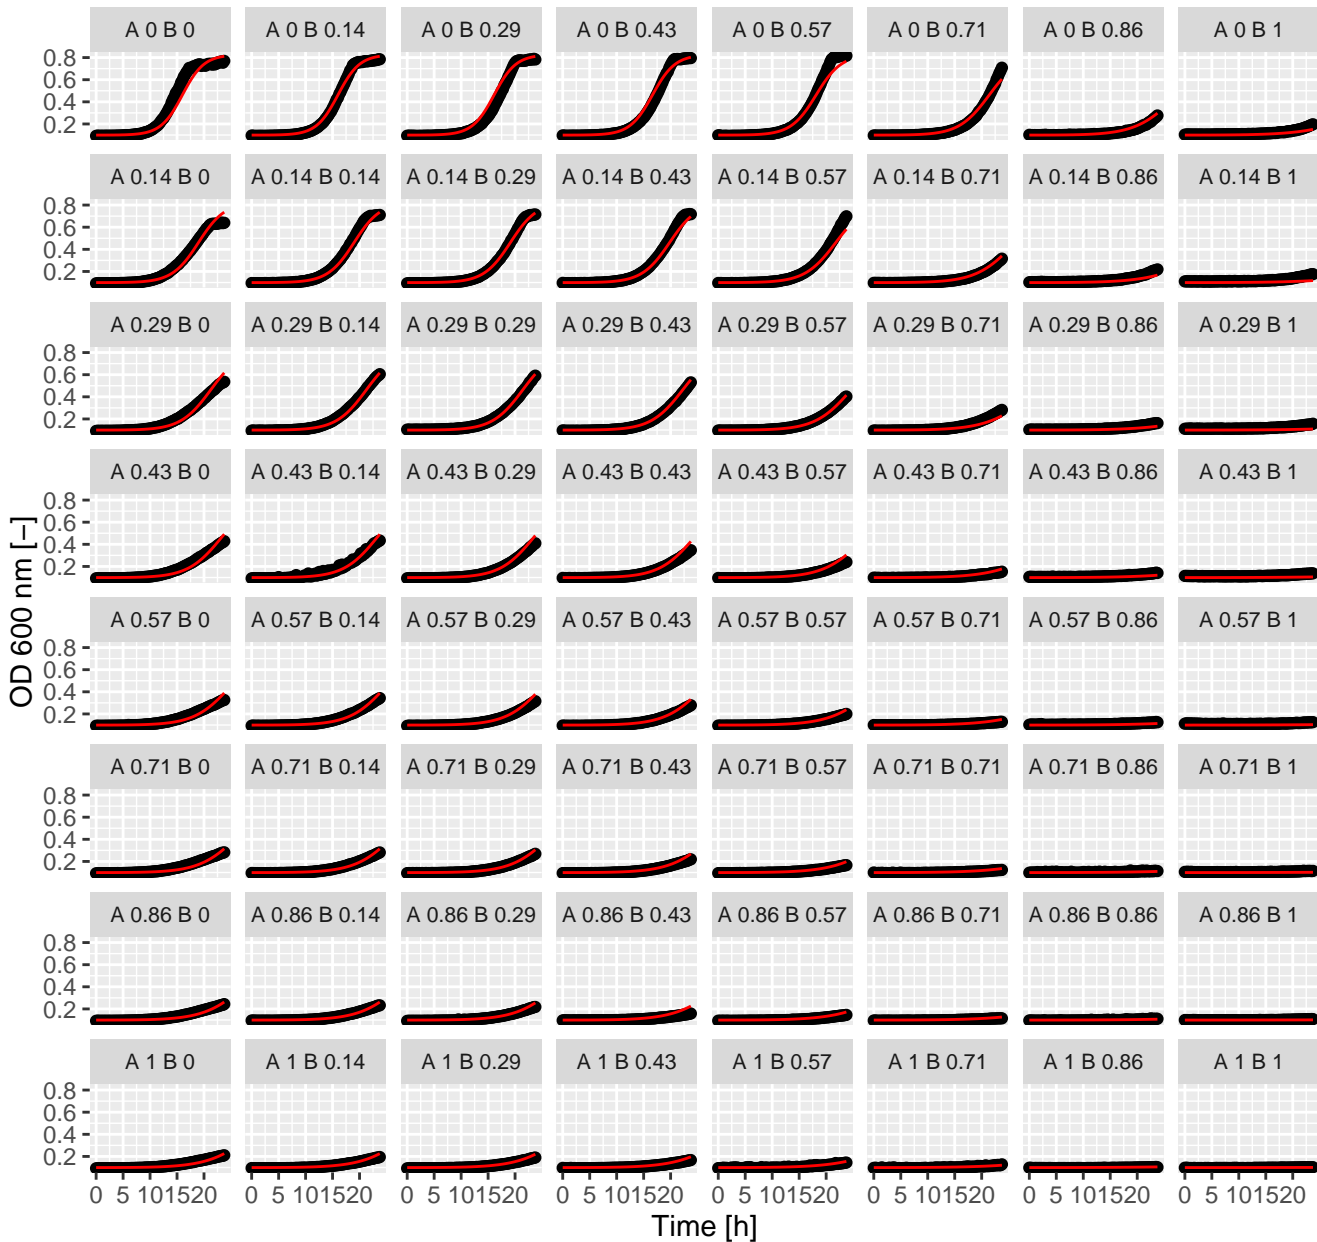

Chl.Ter (= Ax.Bx) Emp. Bliss  
beta = 2.14

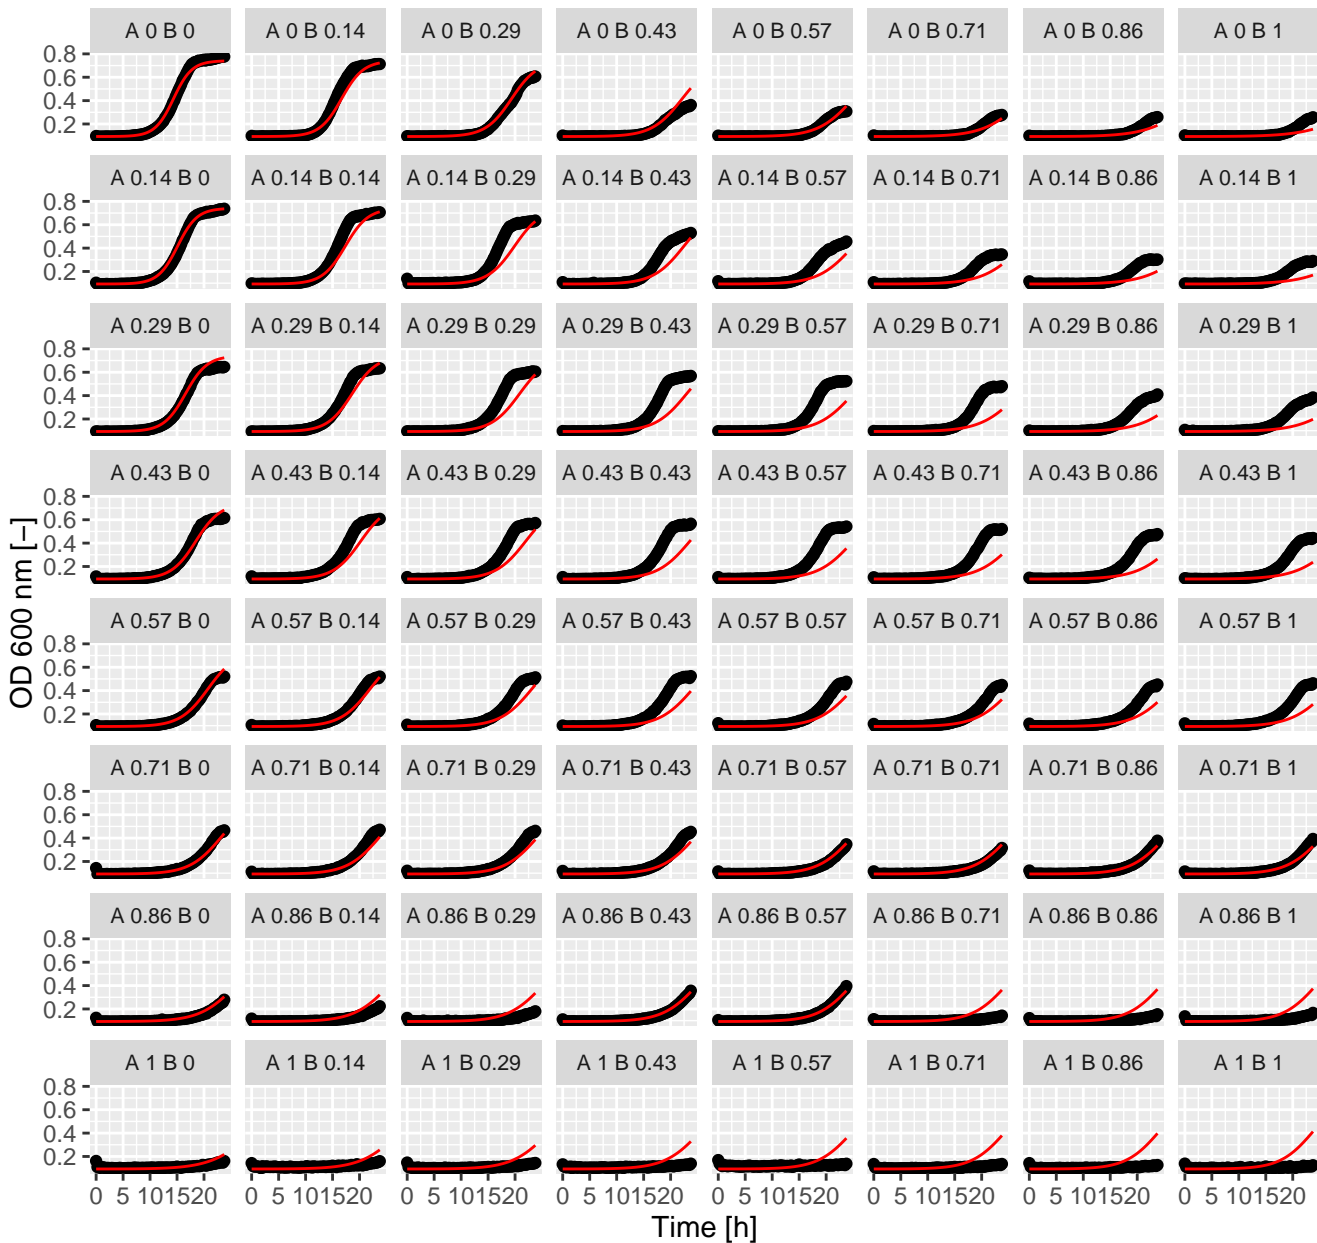

Cis.Cis (= Ax.Bx) Emp. Bliss  
beta = 1.02

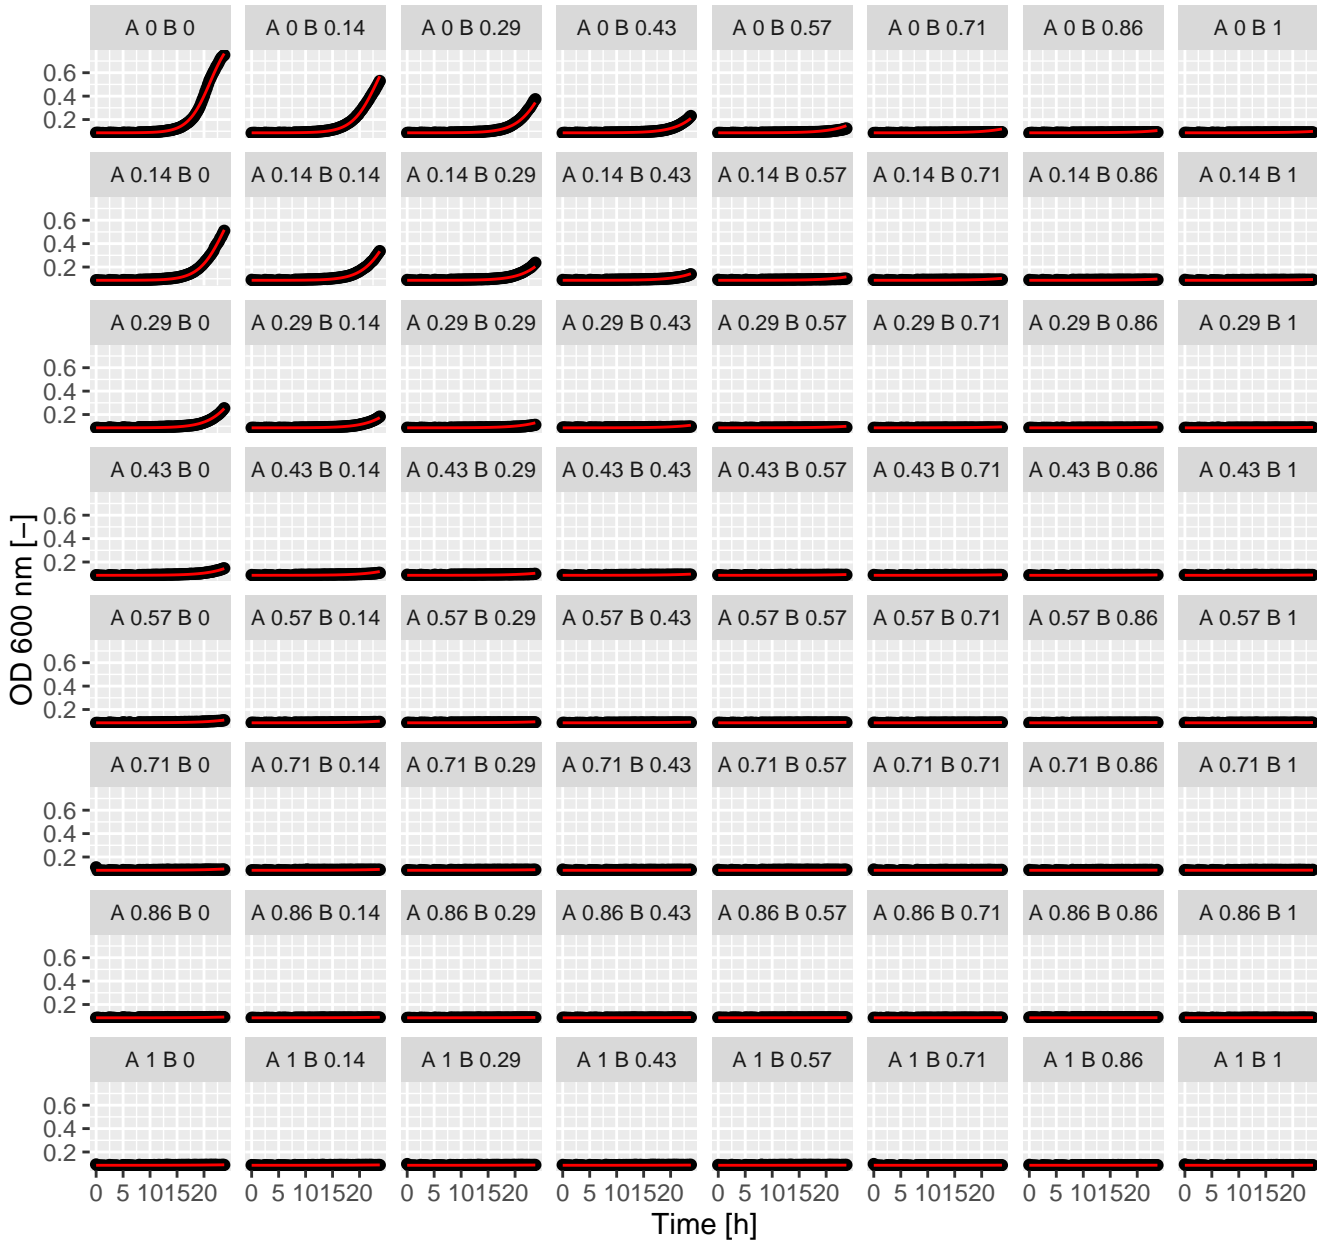

Cis.Lat (= Ax.Bx) Emp. Bliss  
beta = 0.11

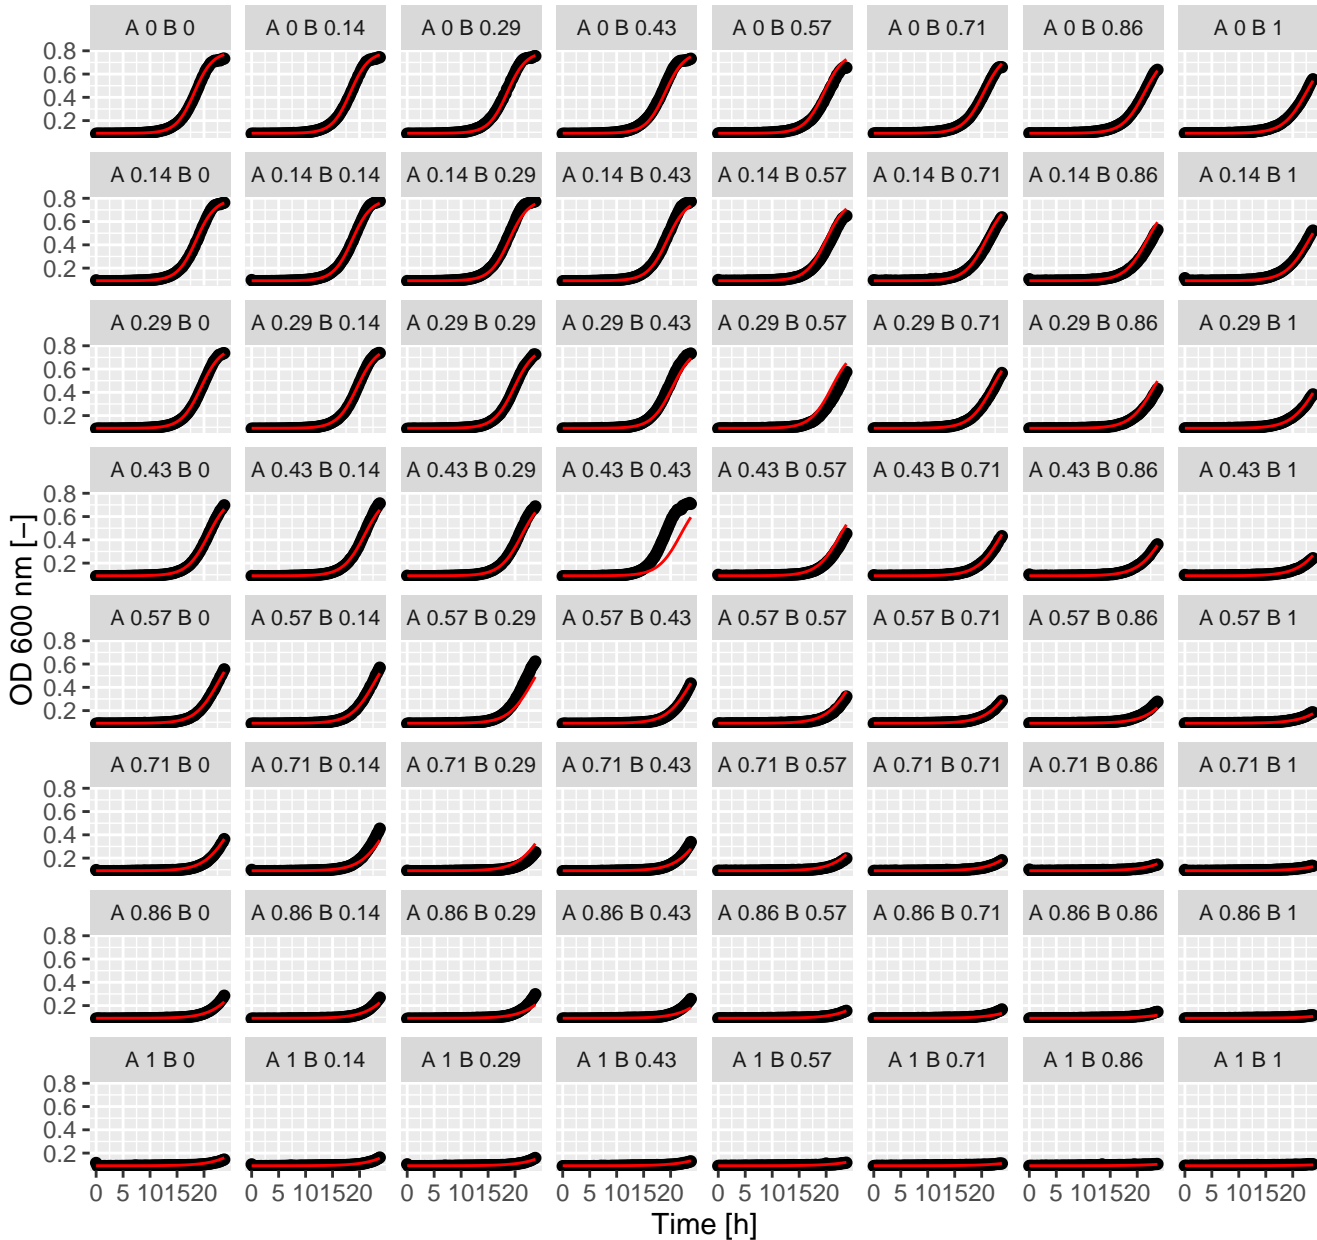

Cis.Sta (= Ax.Bx) Emp. Bliss  
beta = 2.29

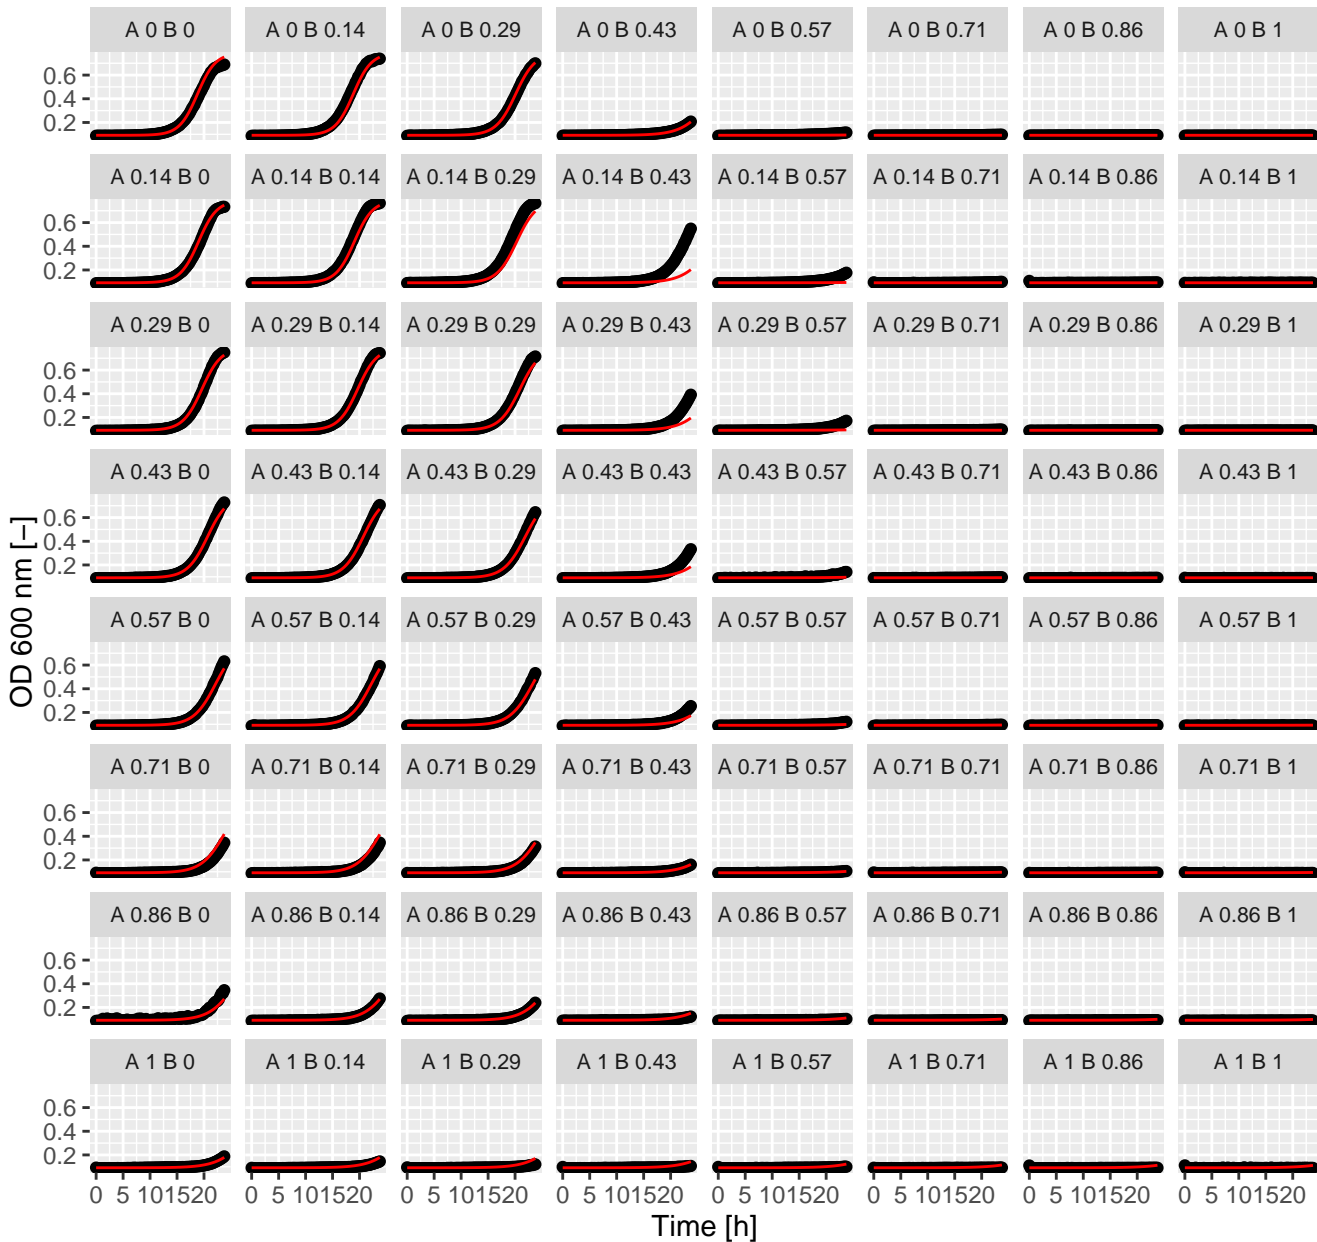



Cis.Tac (= Ax.Bx) Emp. Bliss  
beta = -3.73

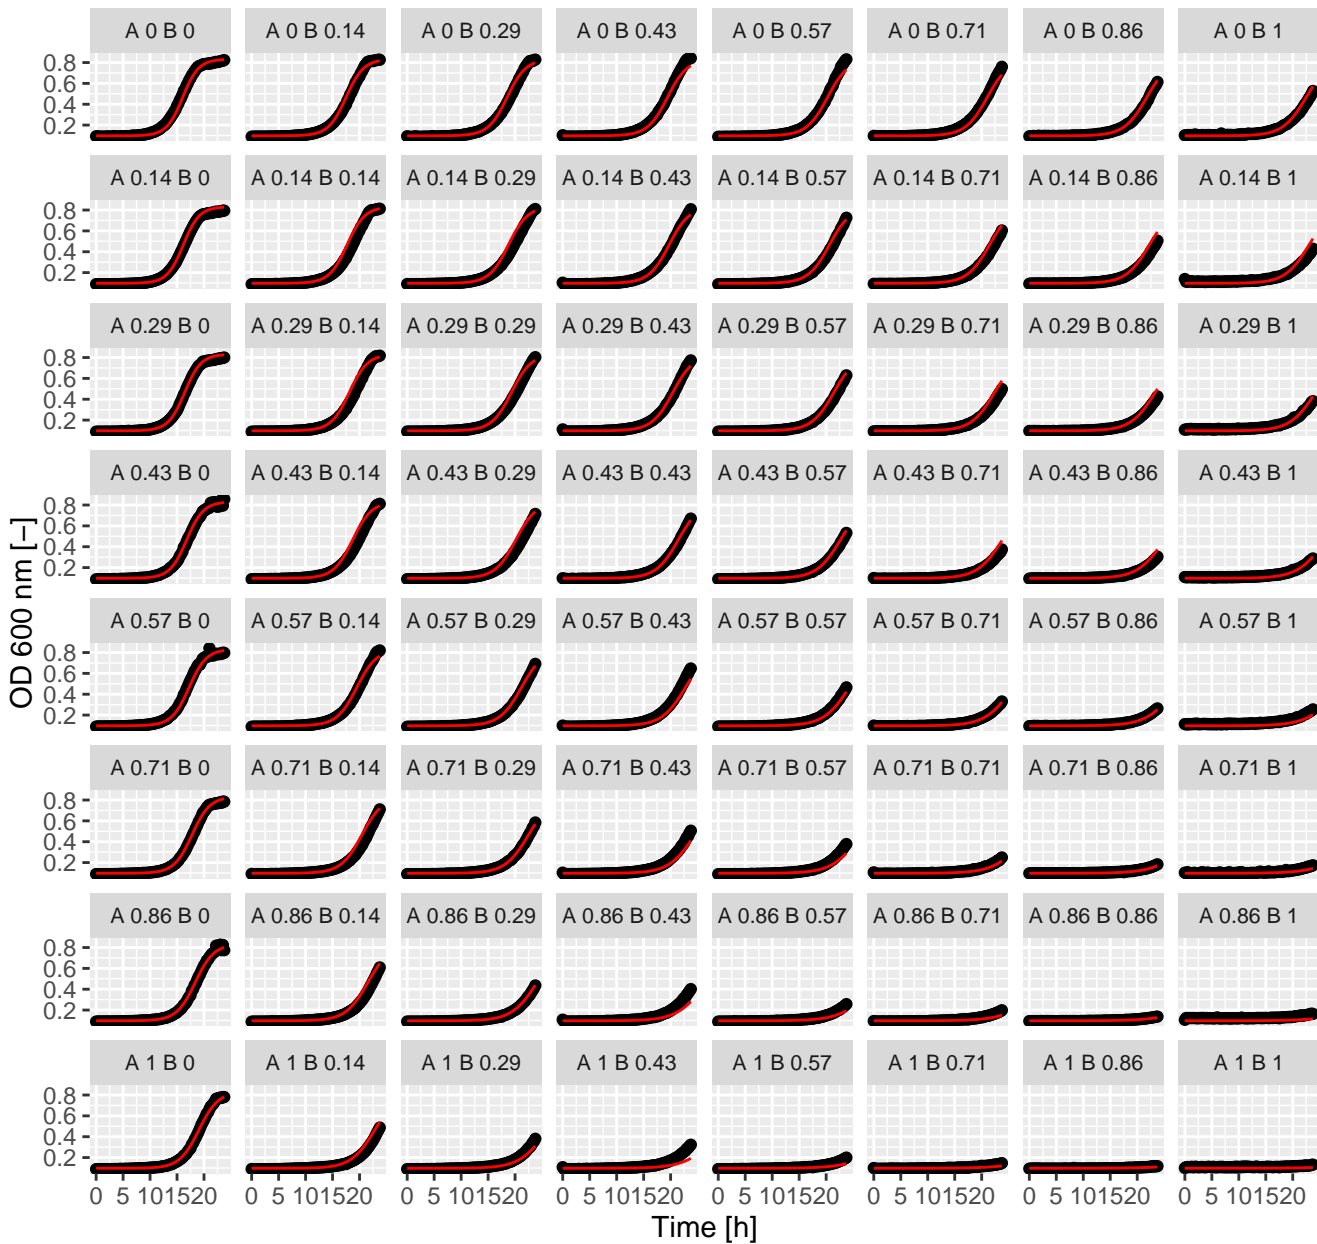

Cis.Ter (= Ax.Bx) Emp. Bliss  
beta = 1.33

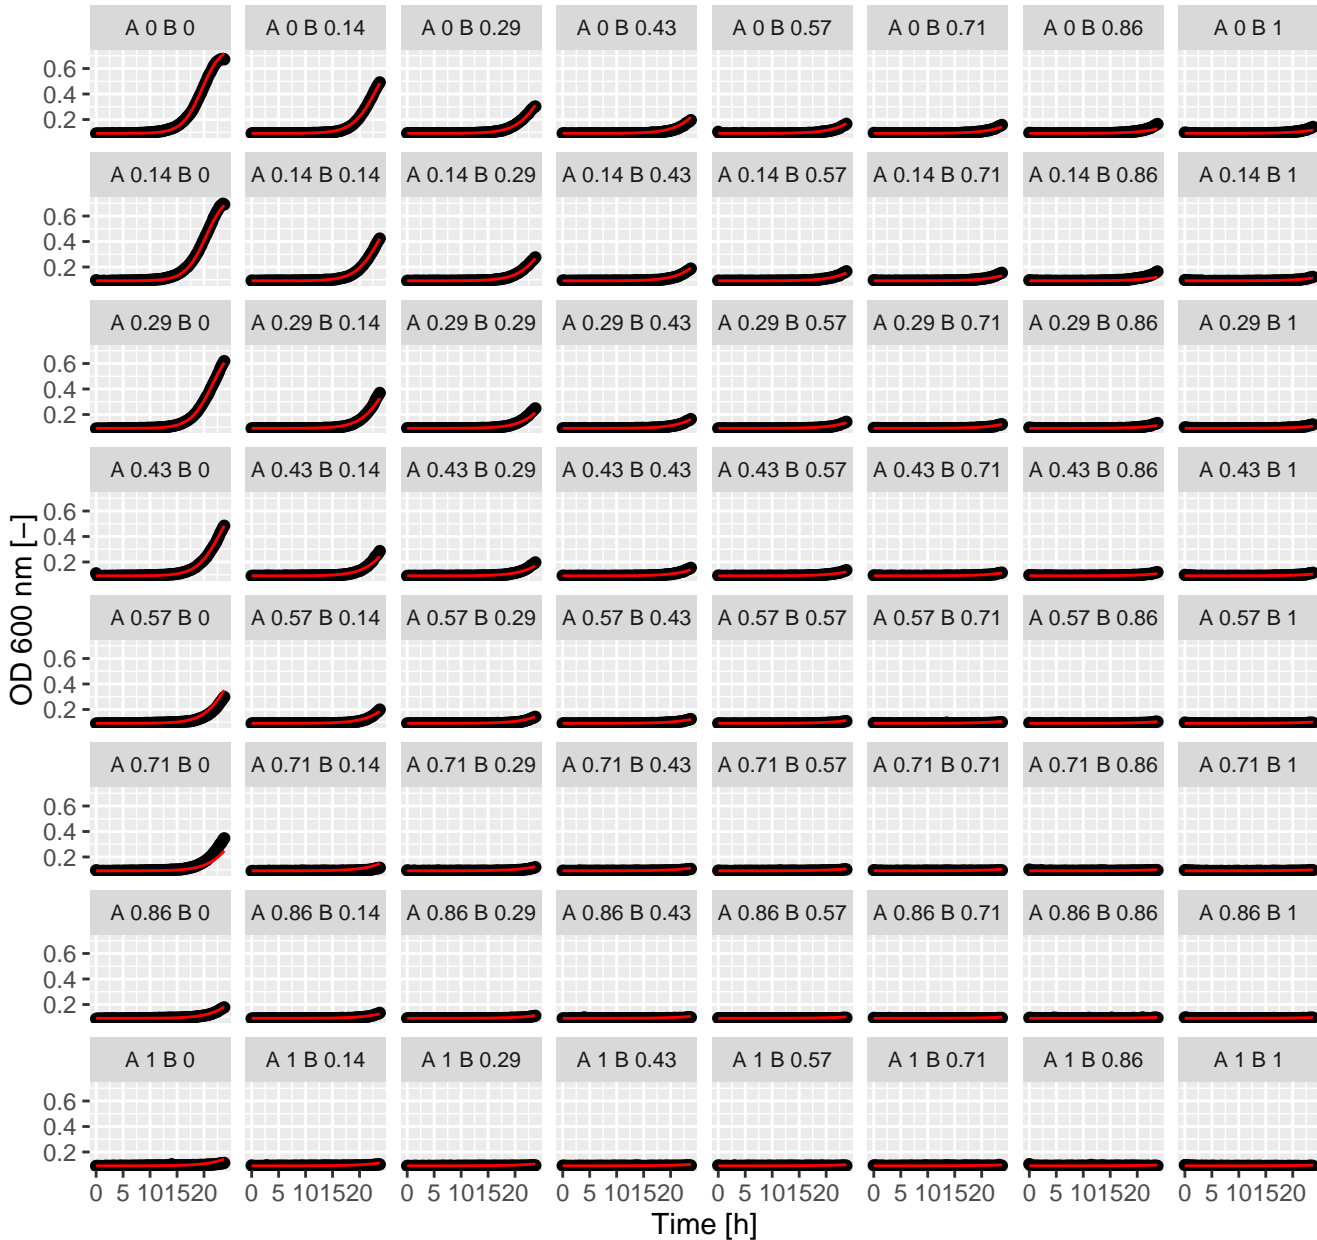

Clo.Rad (= Ax.Bx) Emp. Bliss  
beta = -5.13

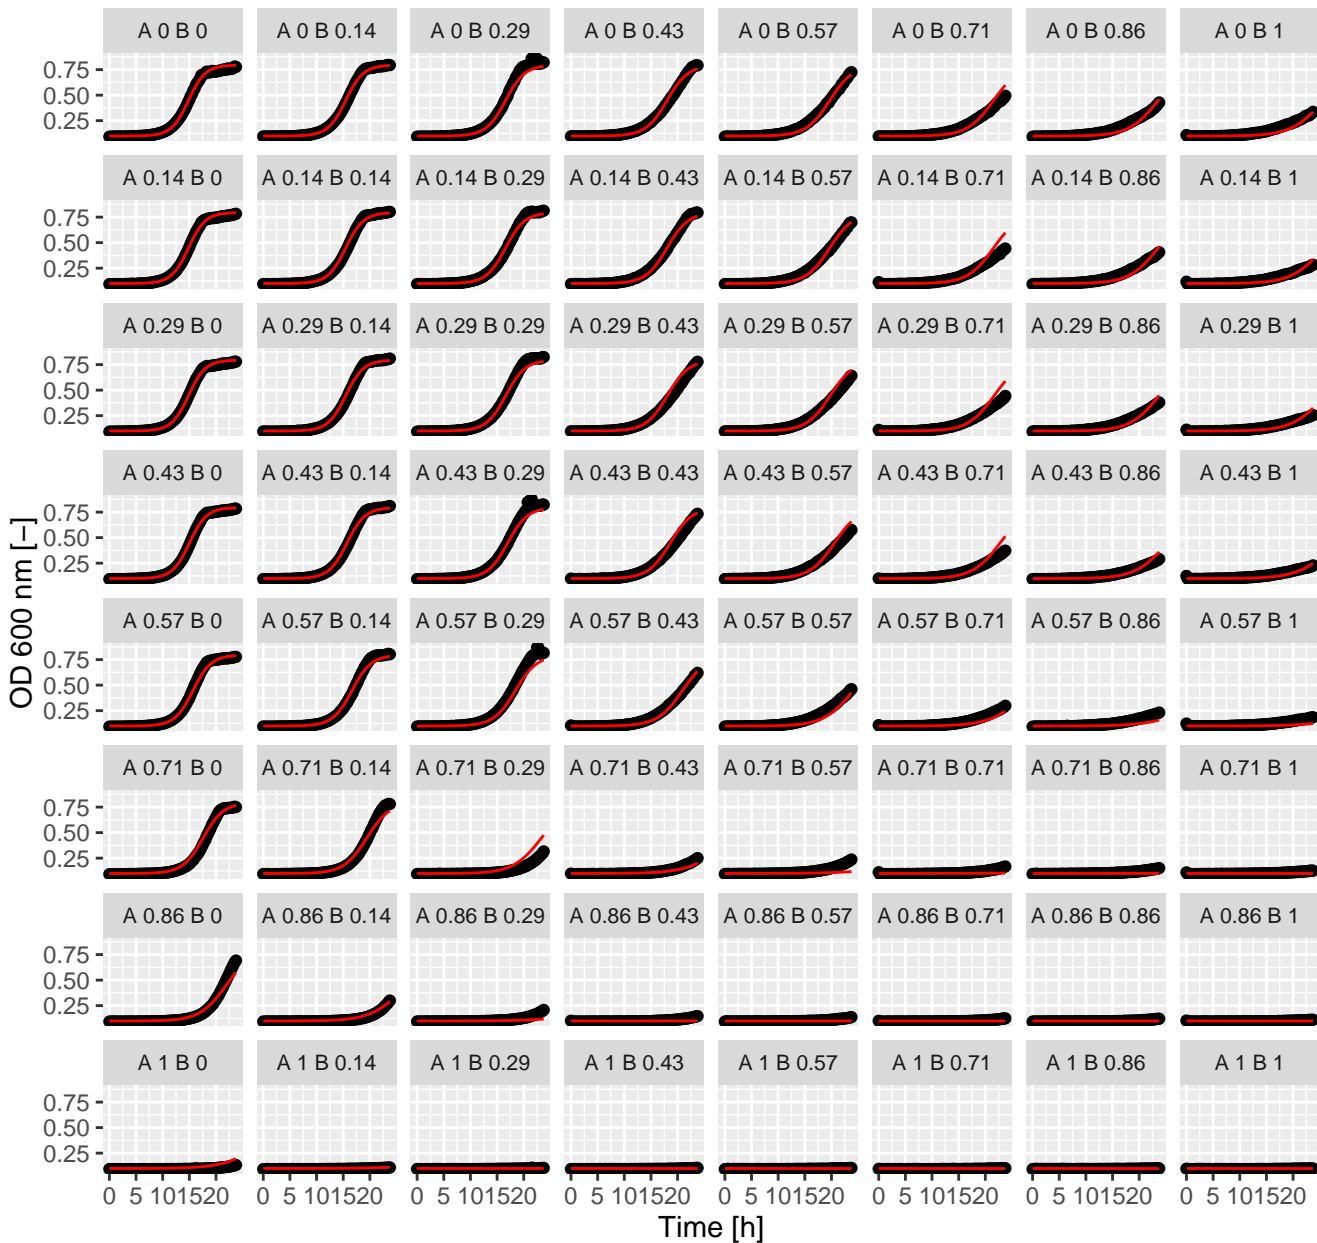

Cyc.Cyc (= Ax.Bx) Emp. Bliss  
beta = 0.31

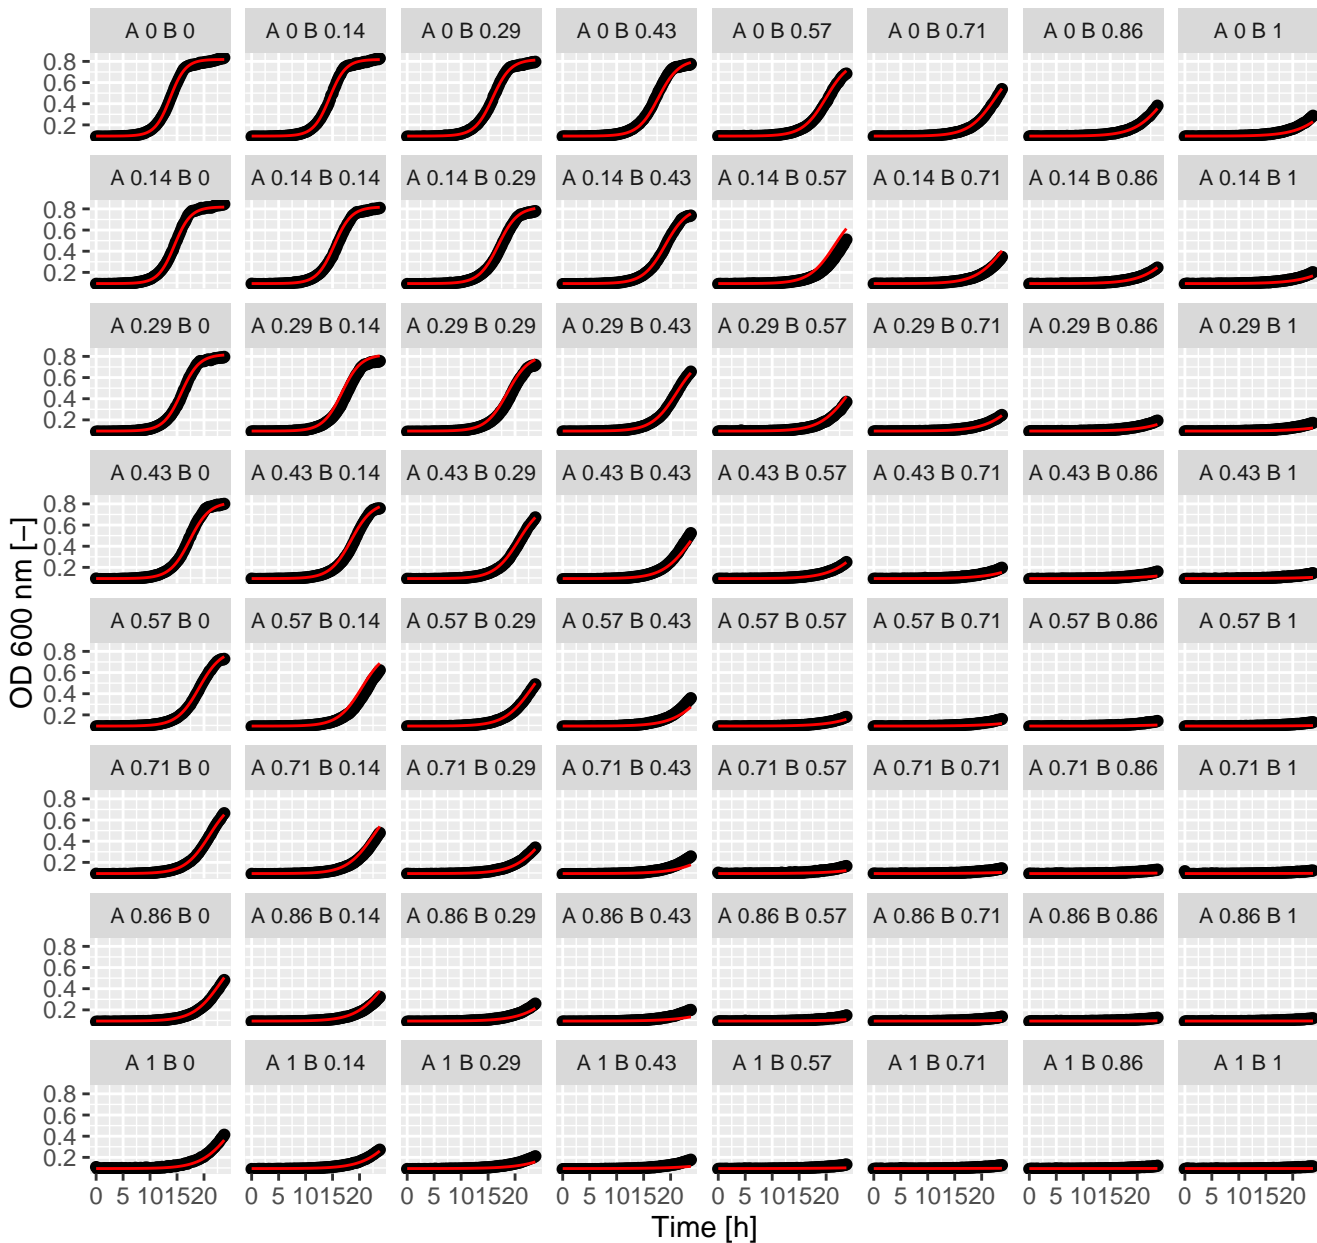

Cyc.Lat (= Ax.Bx) Emp. Bliss  
beta = 1.83

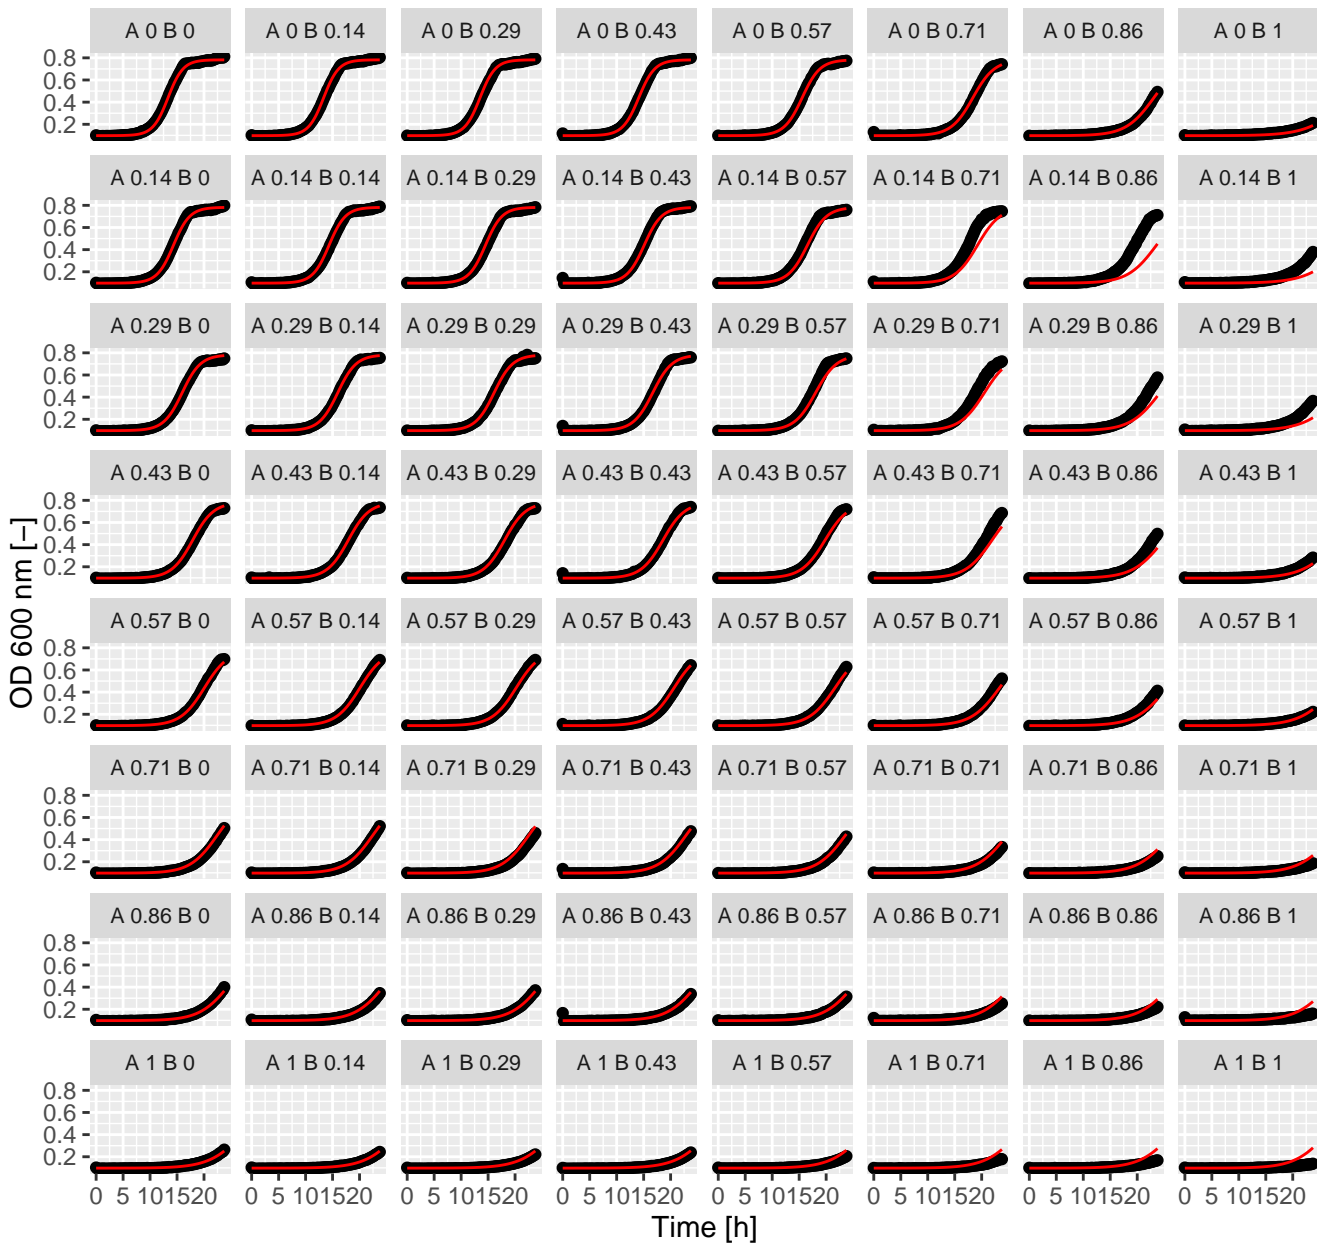

Cyc.Pen (= Ax.Bx) Emp. Bliss  
beta = 1.1

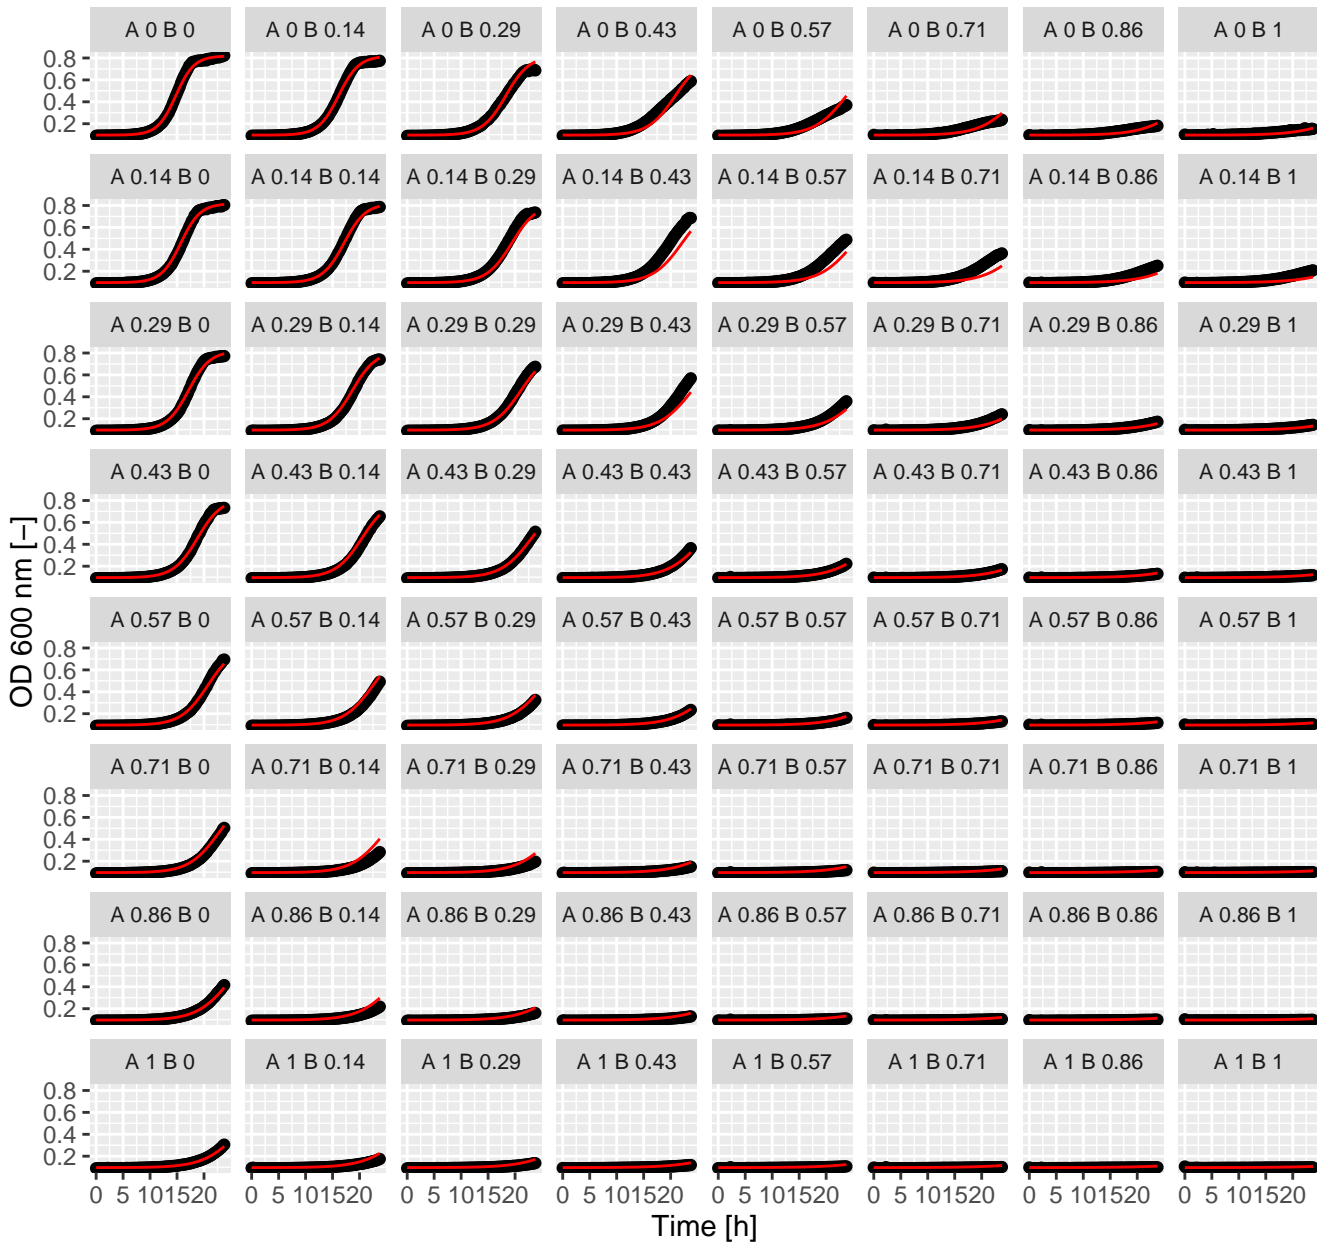

Cyc.Rad (= Ax.Bx) Emp. Bliss  
beta = 2.69

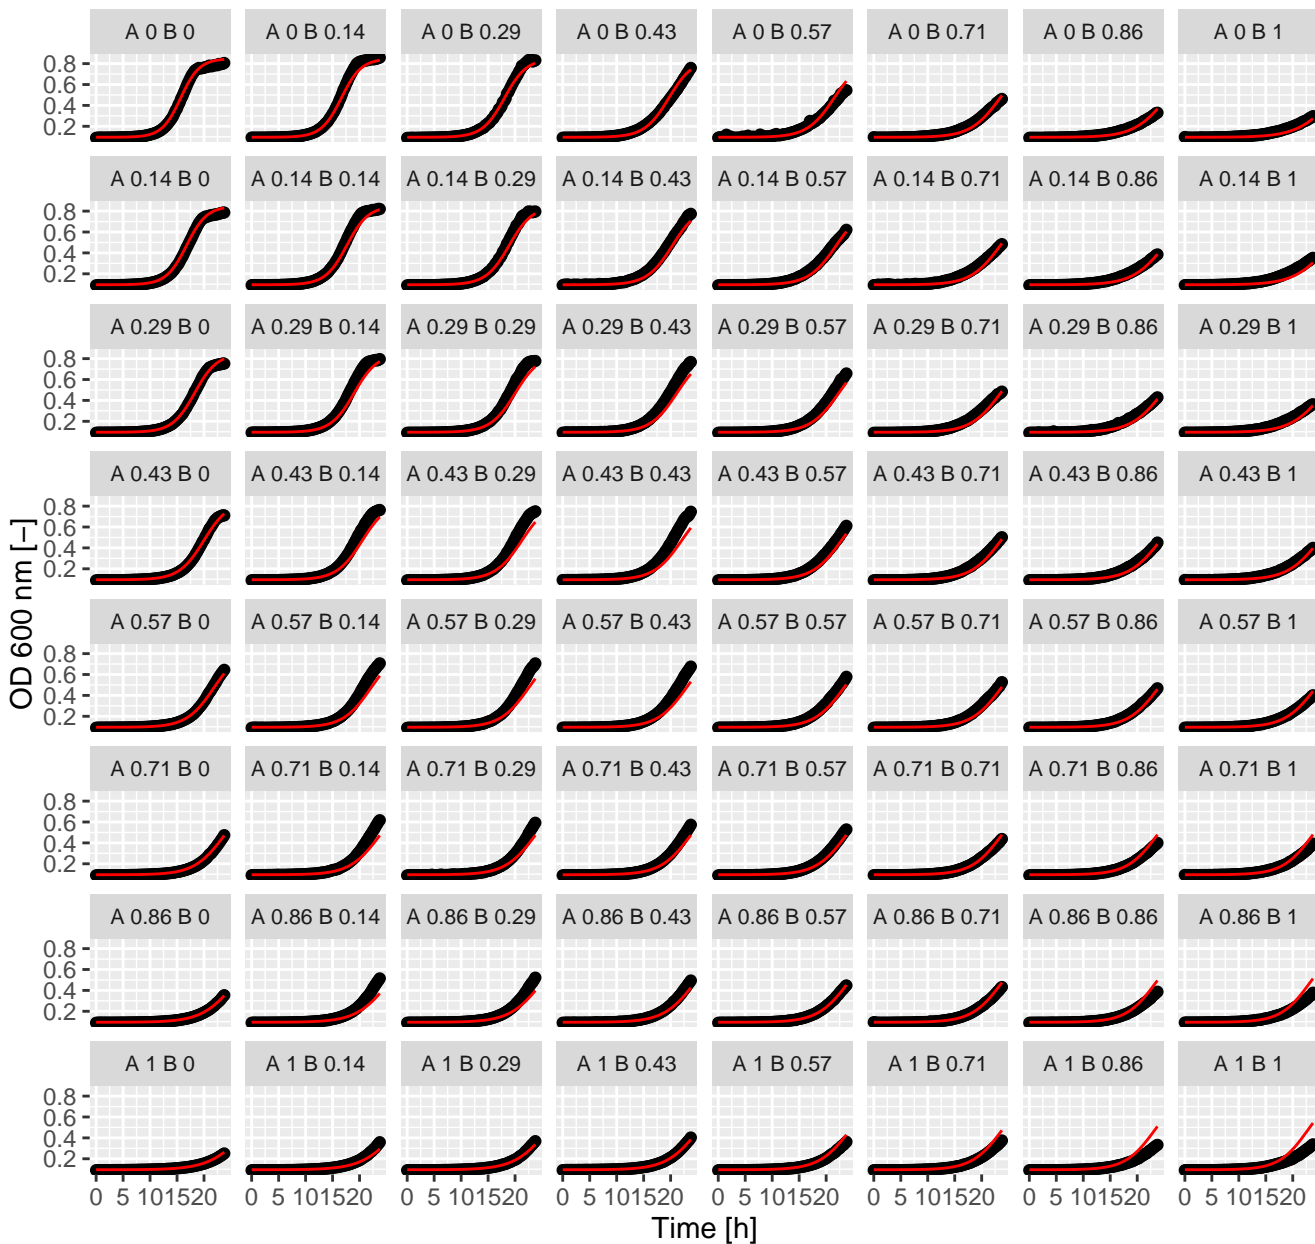

Cyc.Sta (= Ax.Bx) Emp. Bliss  
beta = 1.82

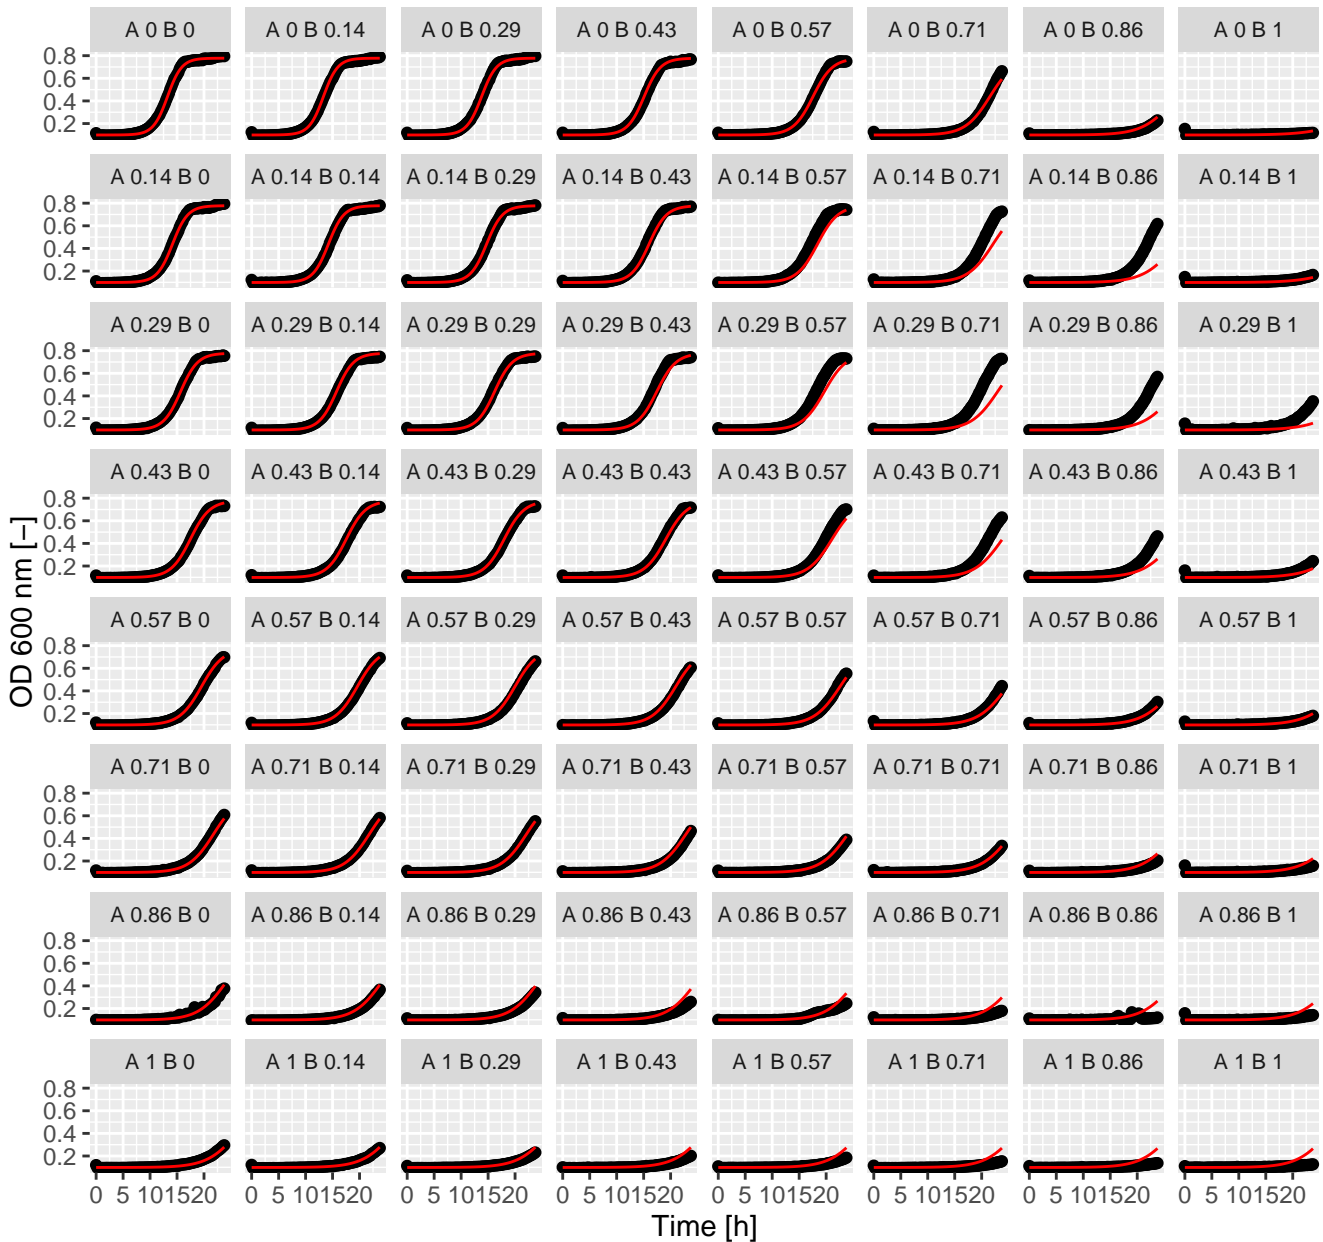



Cyc.Tac (= Ax.Bx) Emp. Bliss  
beta = -67.3

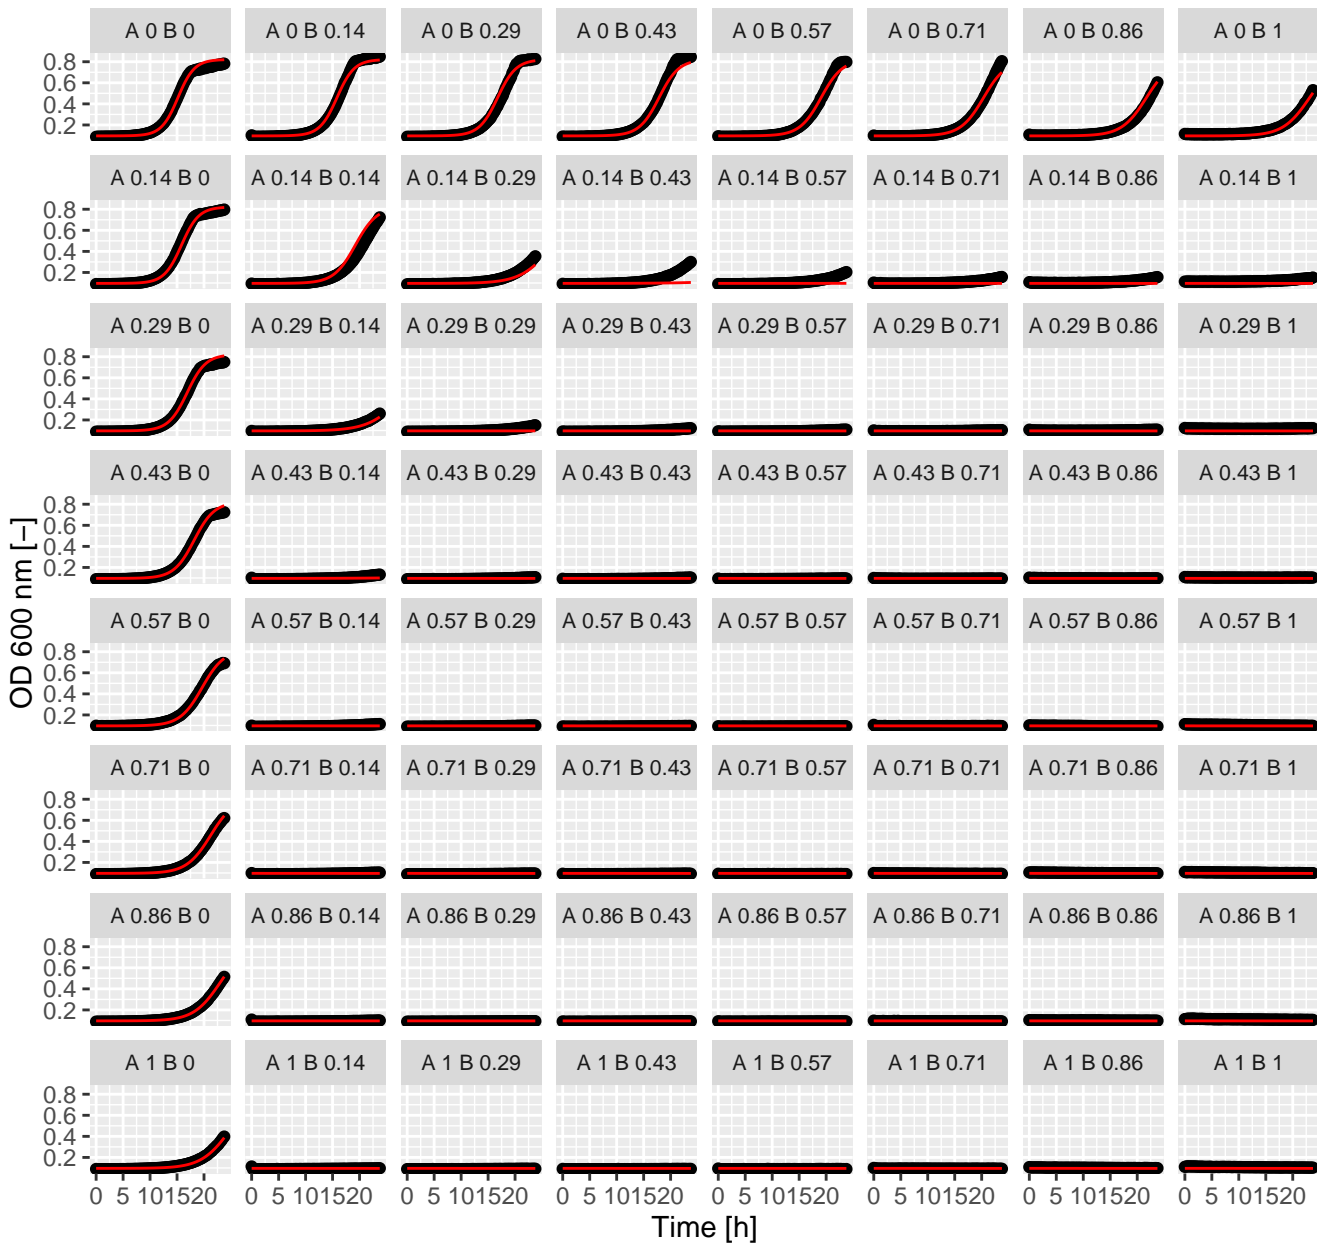

Cyc.Ter (= Ax.Bx) Emp. Bliss  
beta = 1.09

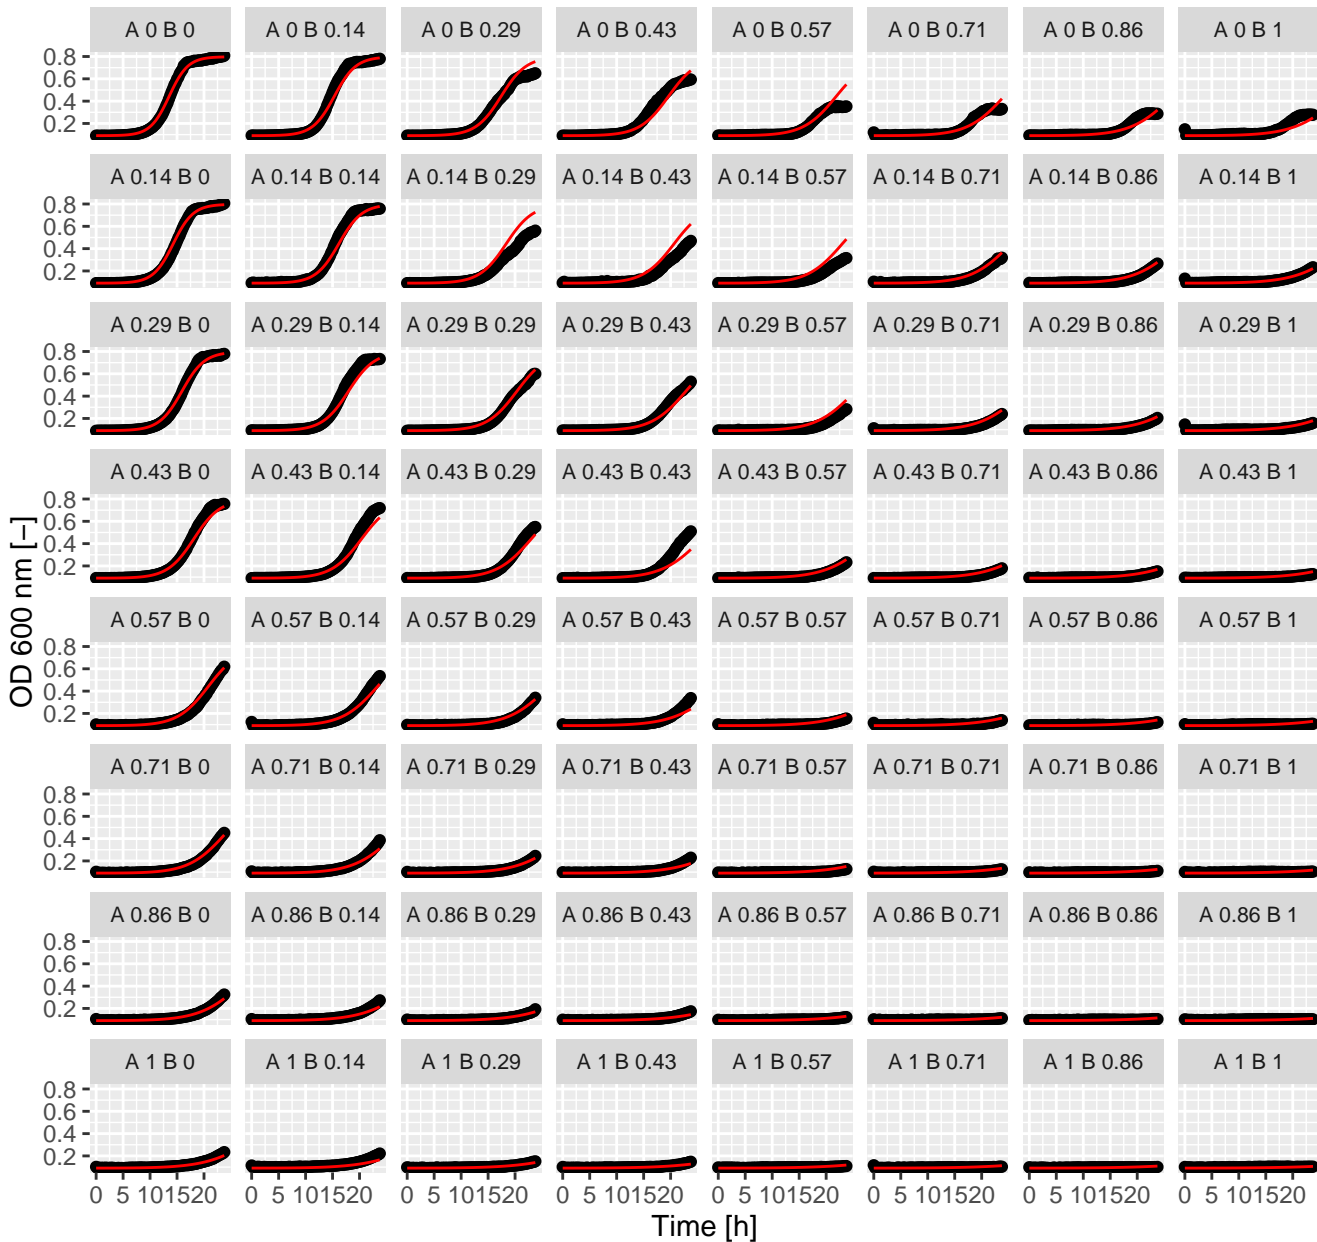

Dyc.Dyc (= Ax.Bx) Emp. Bliss  
beta = -113.1

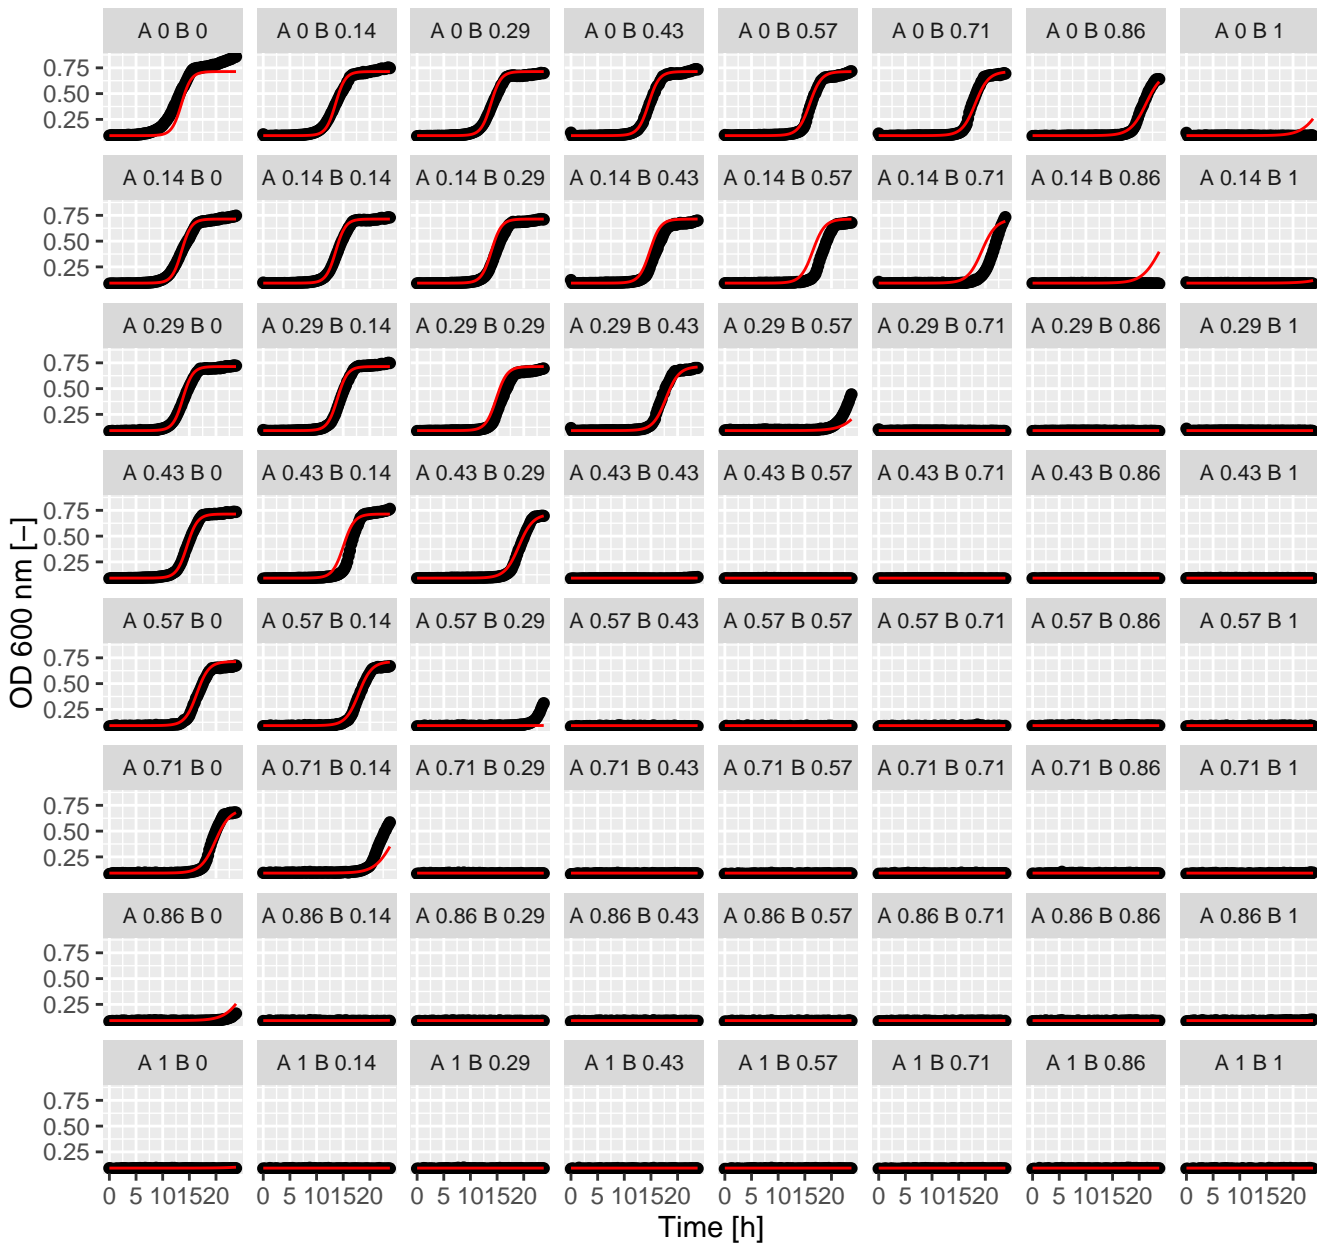

Dyc.Fen (= Ax.Bx) Emp. Bliss  
beta = -0.24

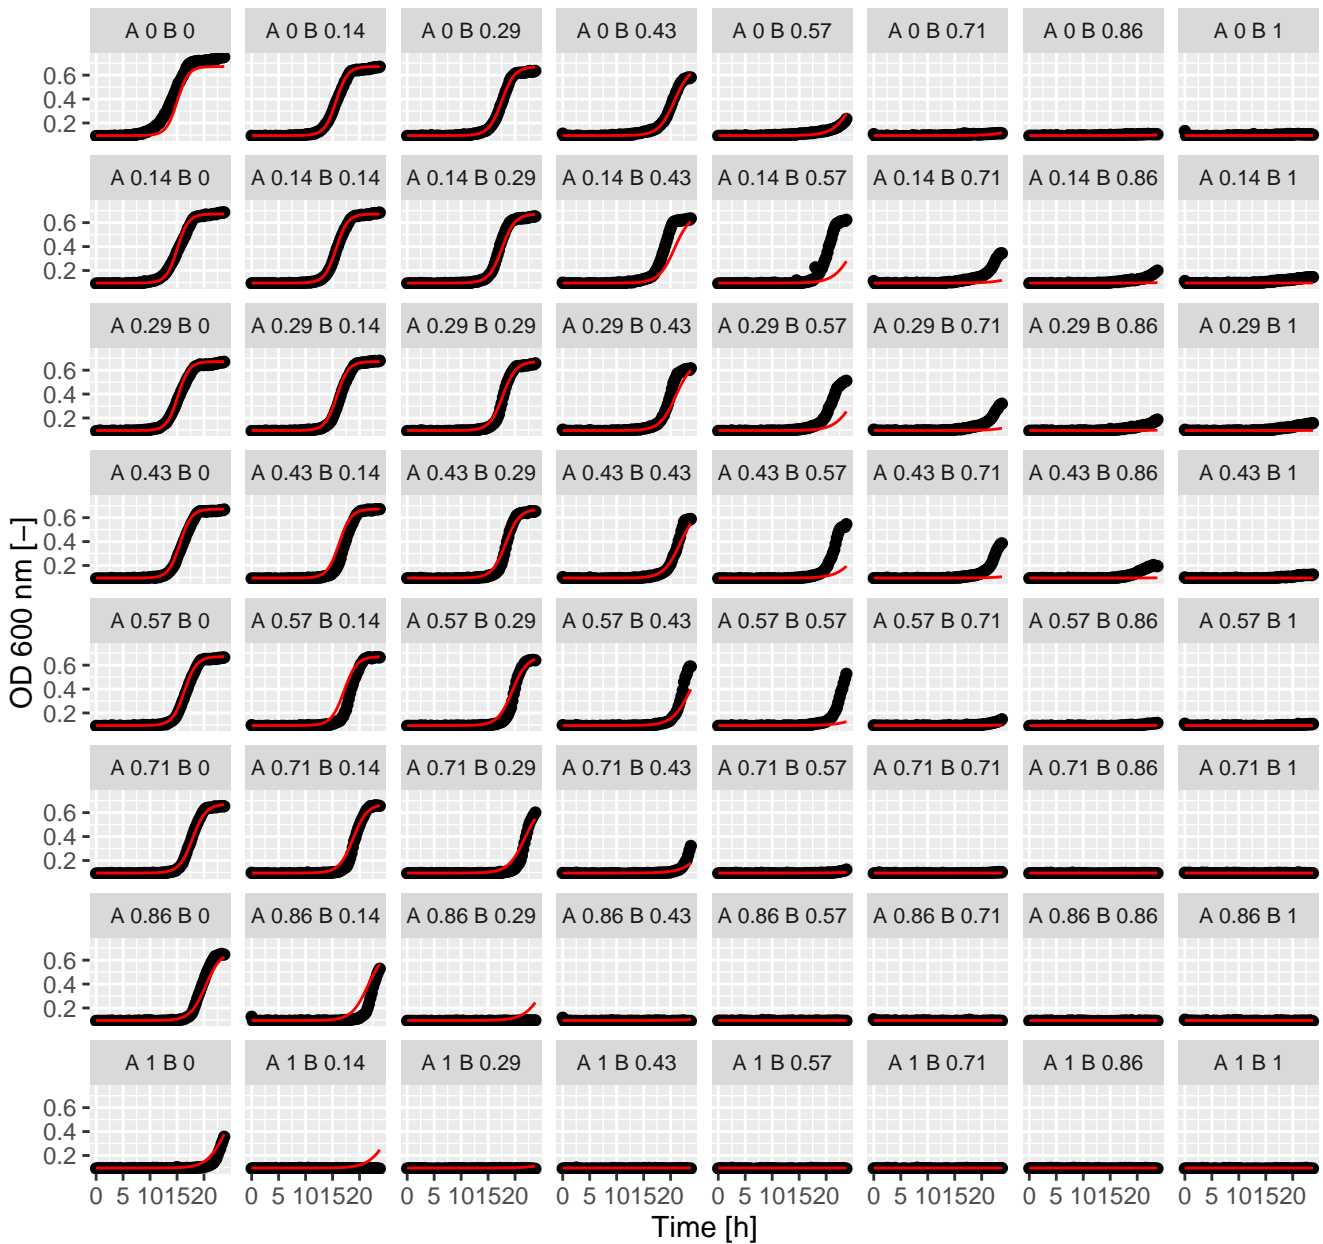

Dyc.Hal (= Ax.Bx) Emp. Bliss  
beta = -23.25

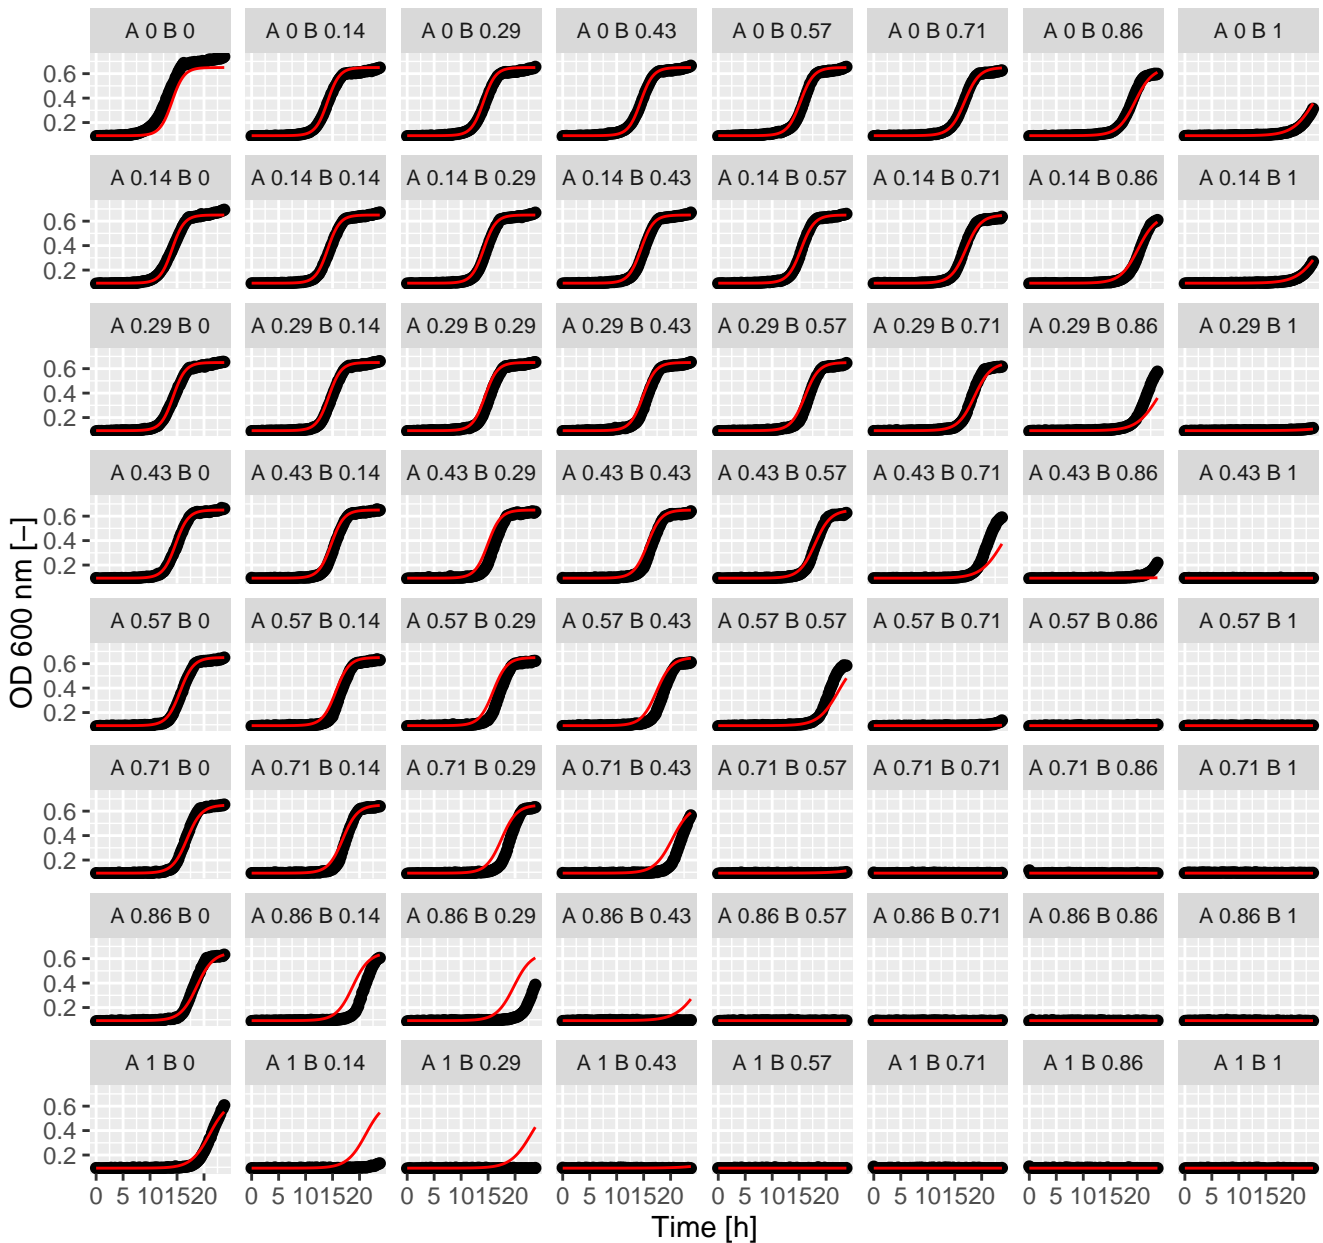

Dyc.Lat (= Ax.Bx) Emp. Bliss  
beta = -43866

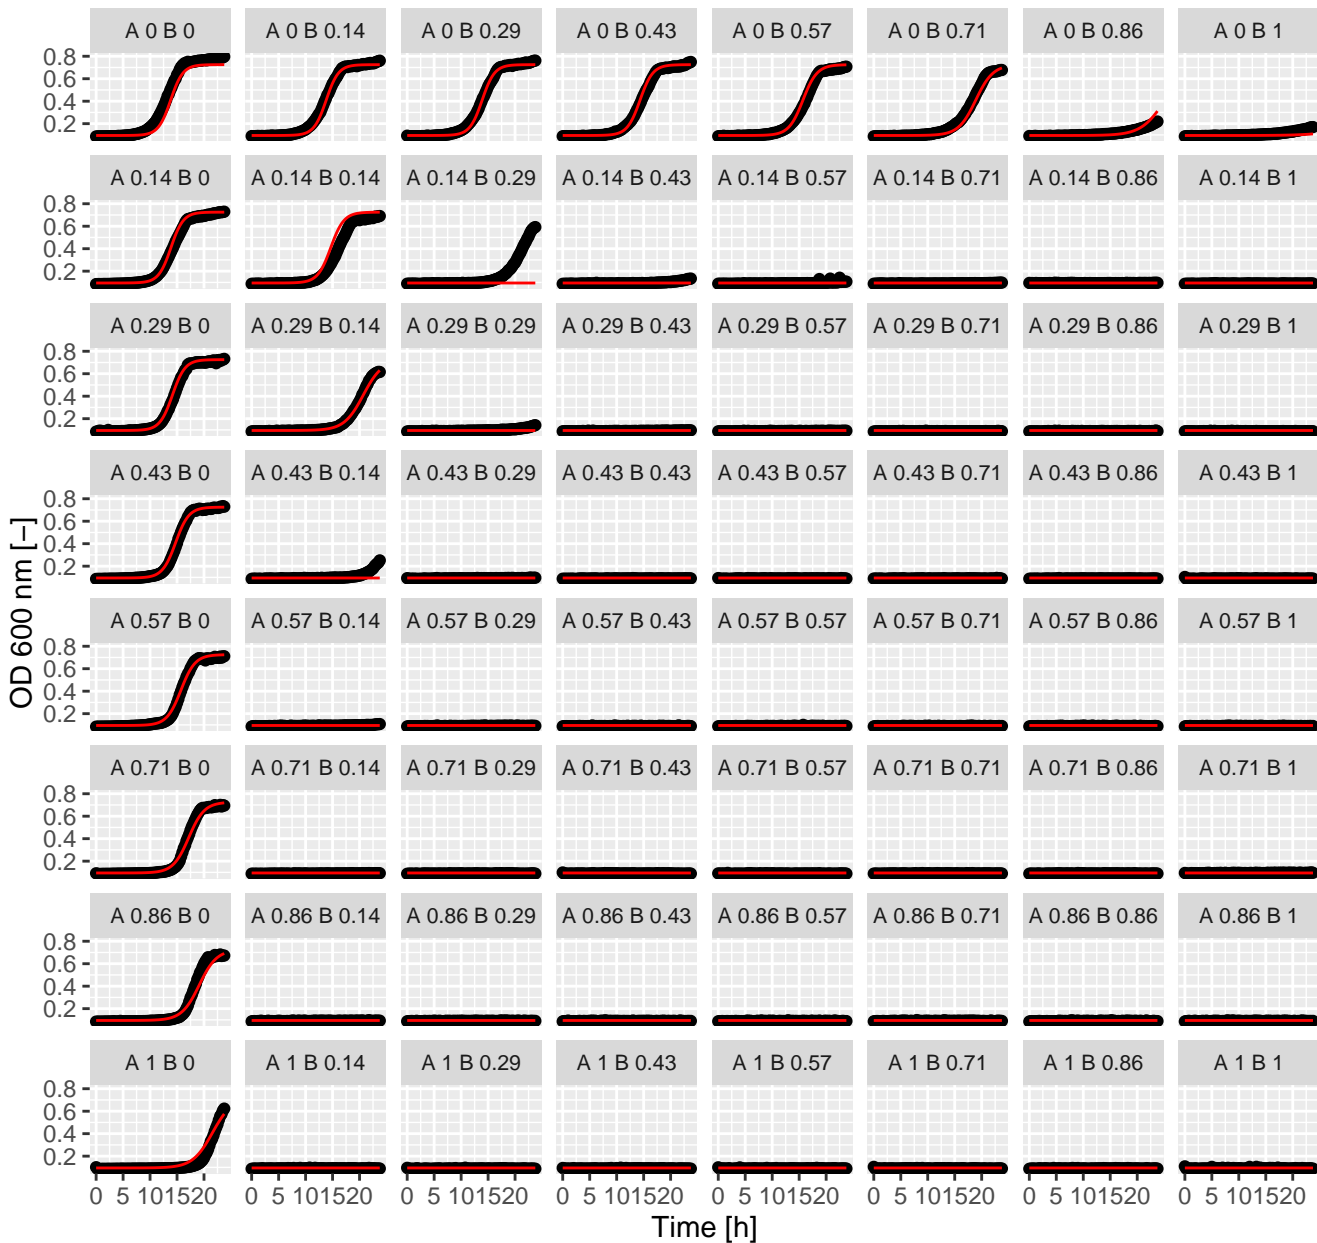

Dyc.Pen (= Ax.Bx) Emp. Bliss  
beta = -83.5

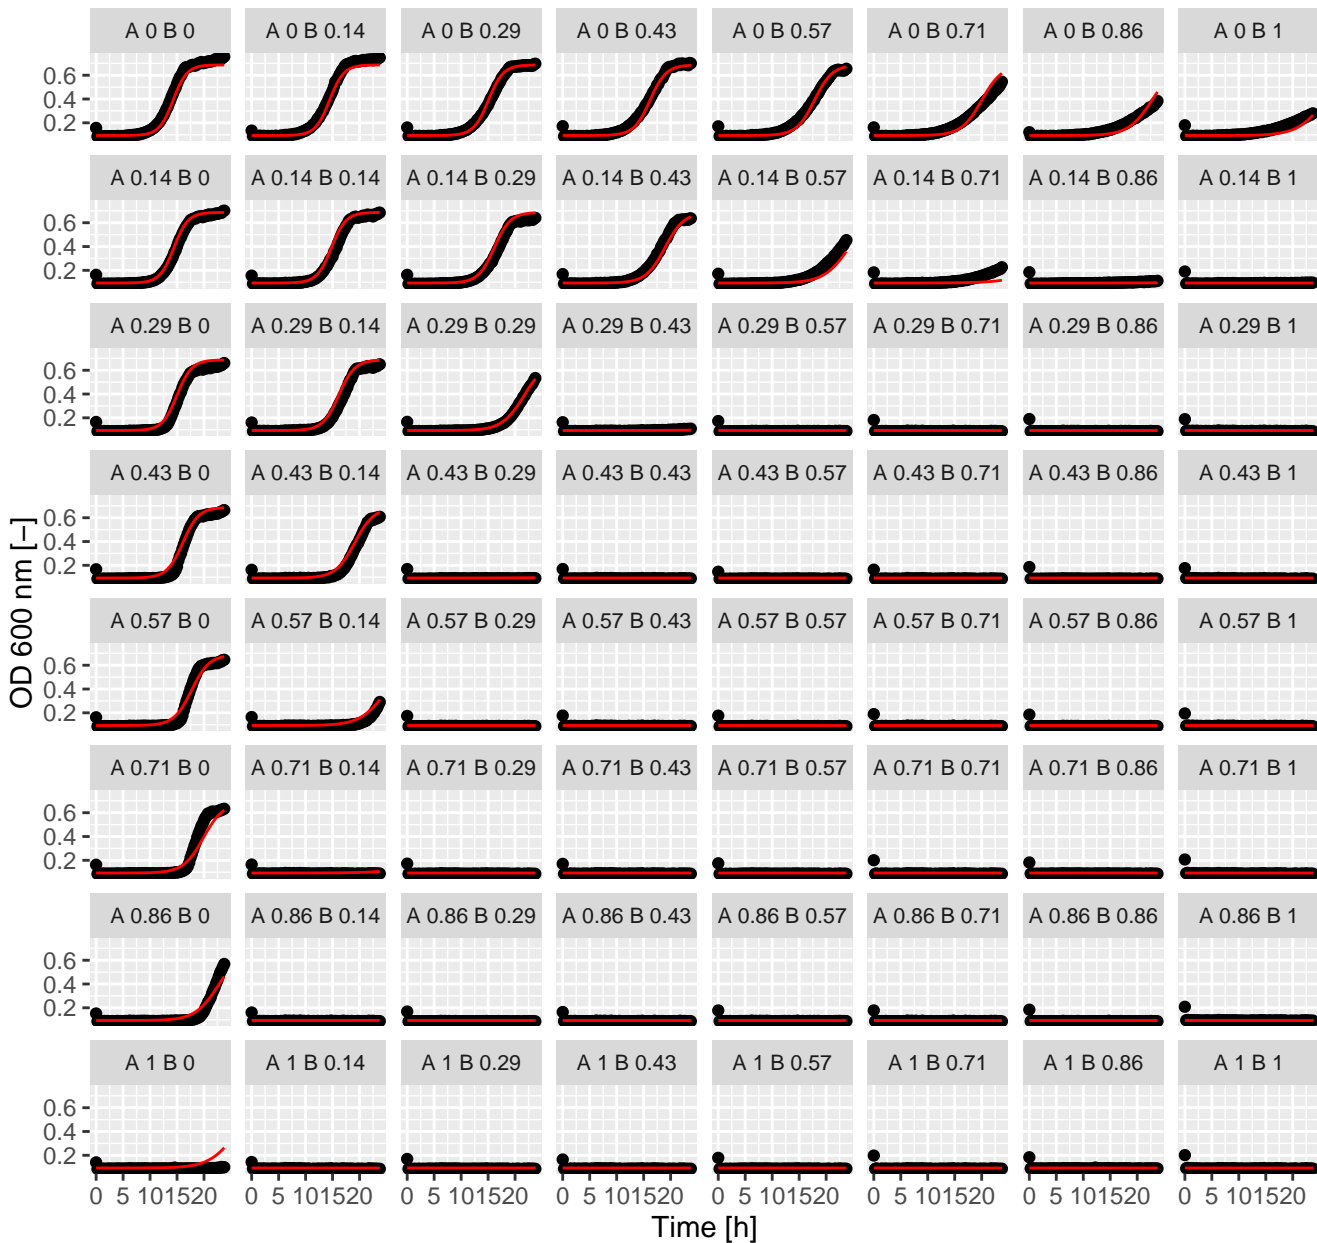

Dyc.Rap (= Ax.Bx) Emp. Bliss  
beta = -9152.4

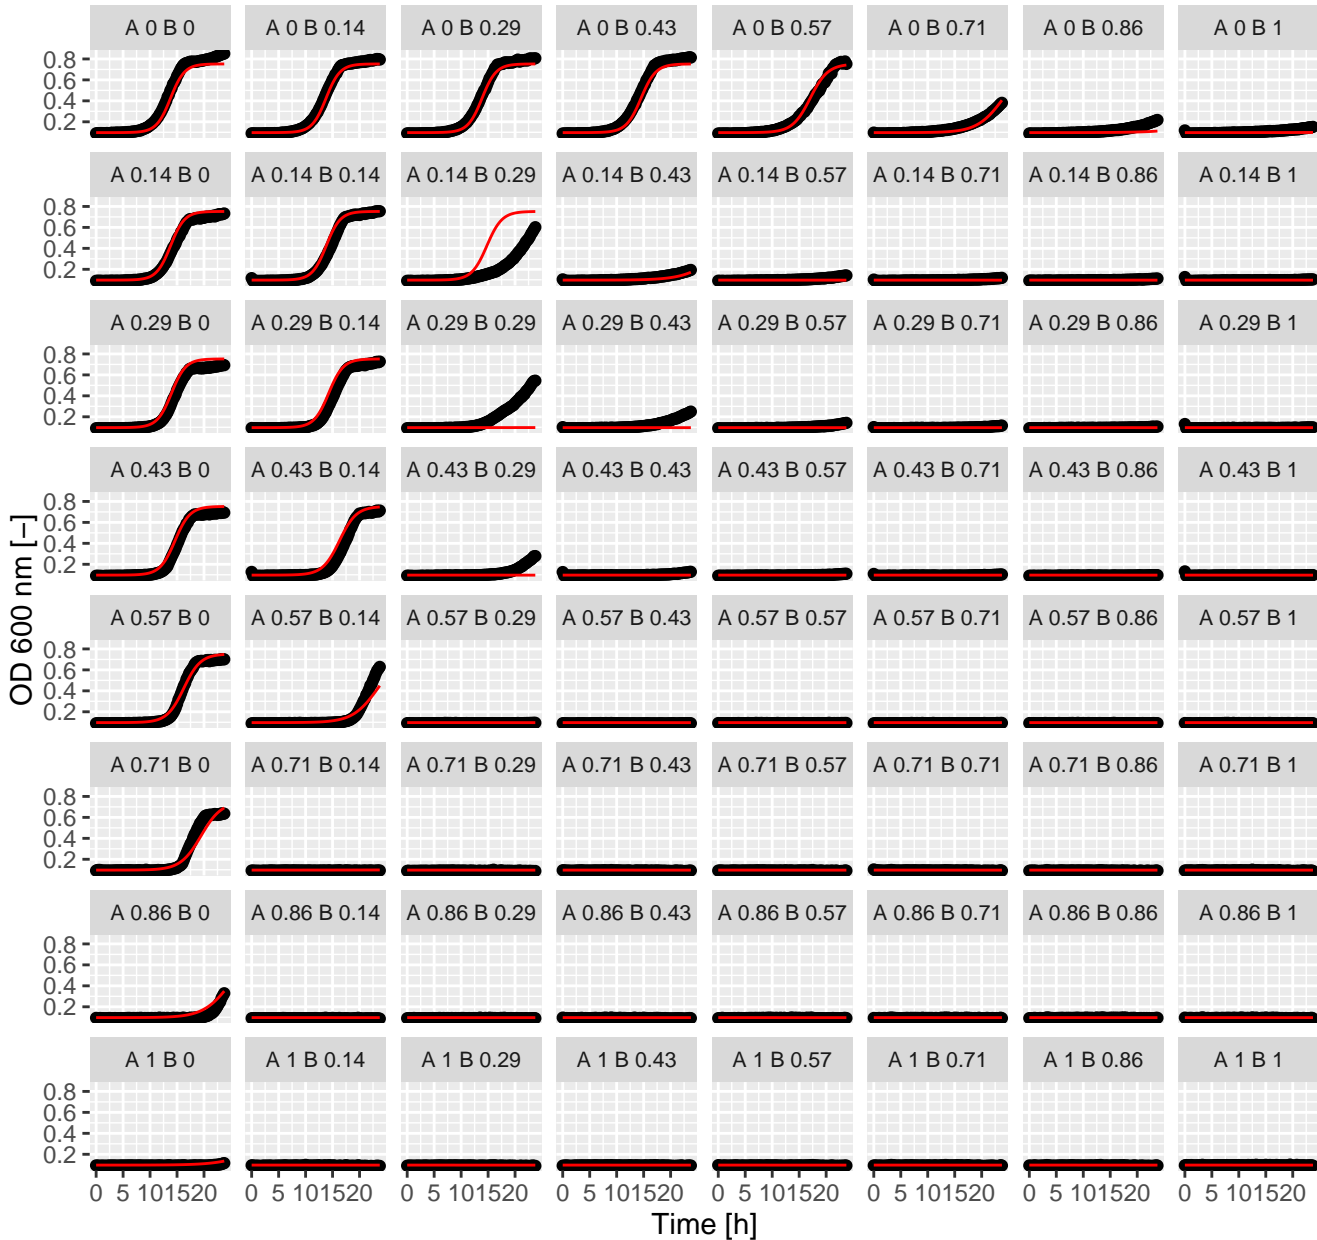





Dyc.Tac (= Ax.Bx) Emp. Bliss  
beta = -83.55

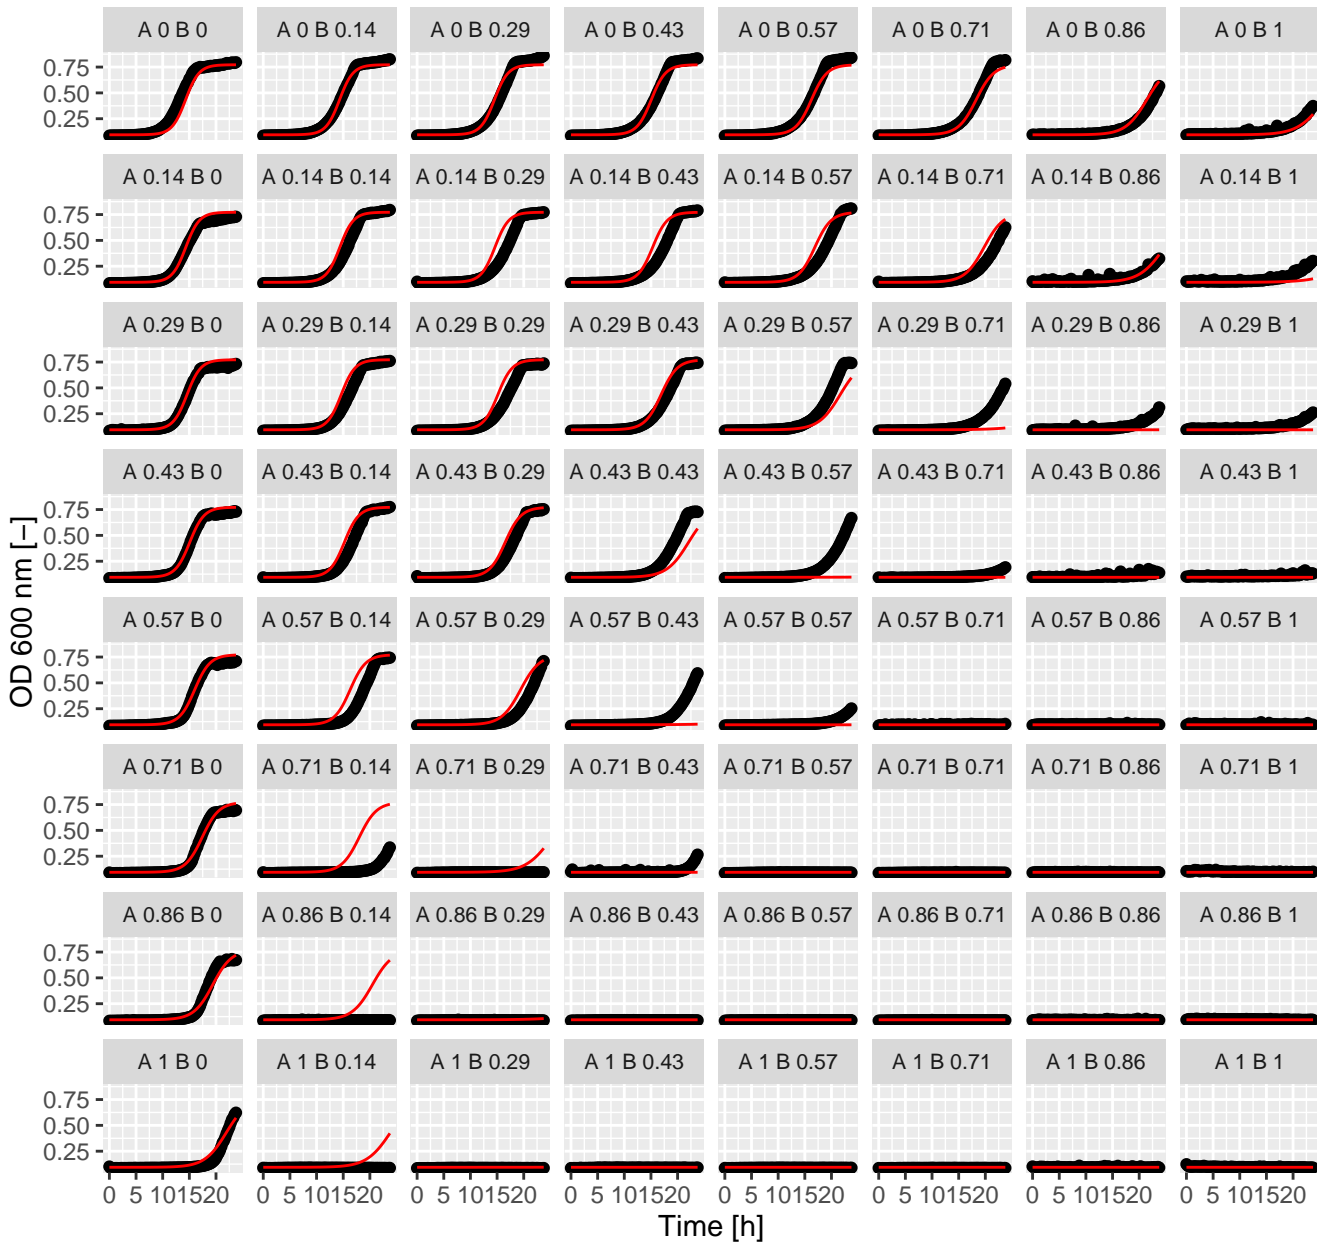

Dyc.Ter (= Ax.Bx) Emp. Bliss  
beta = -15.71

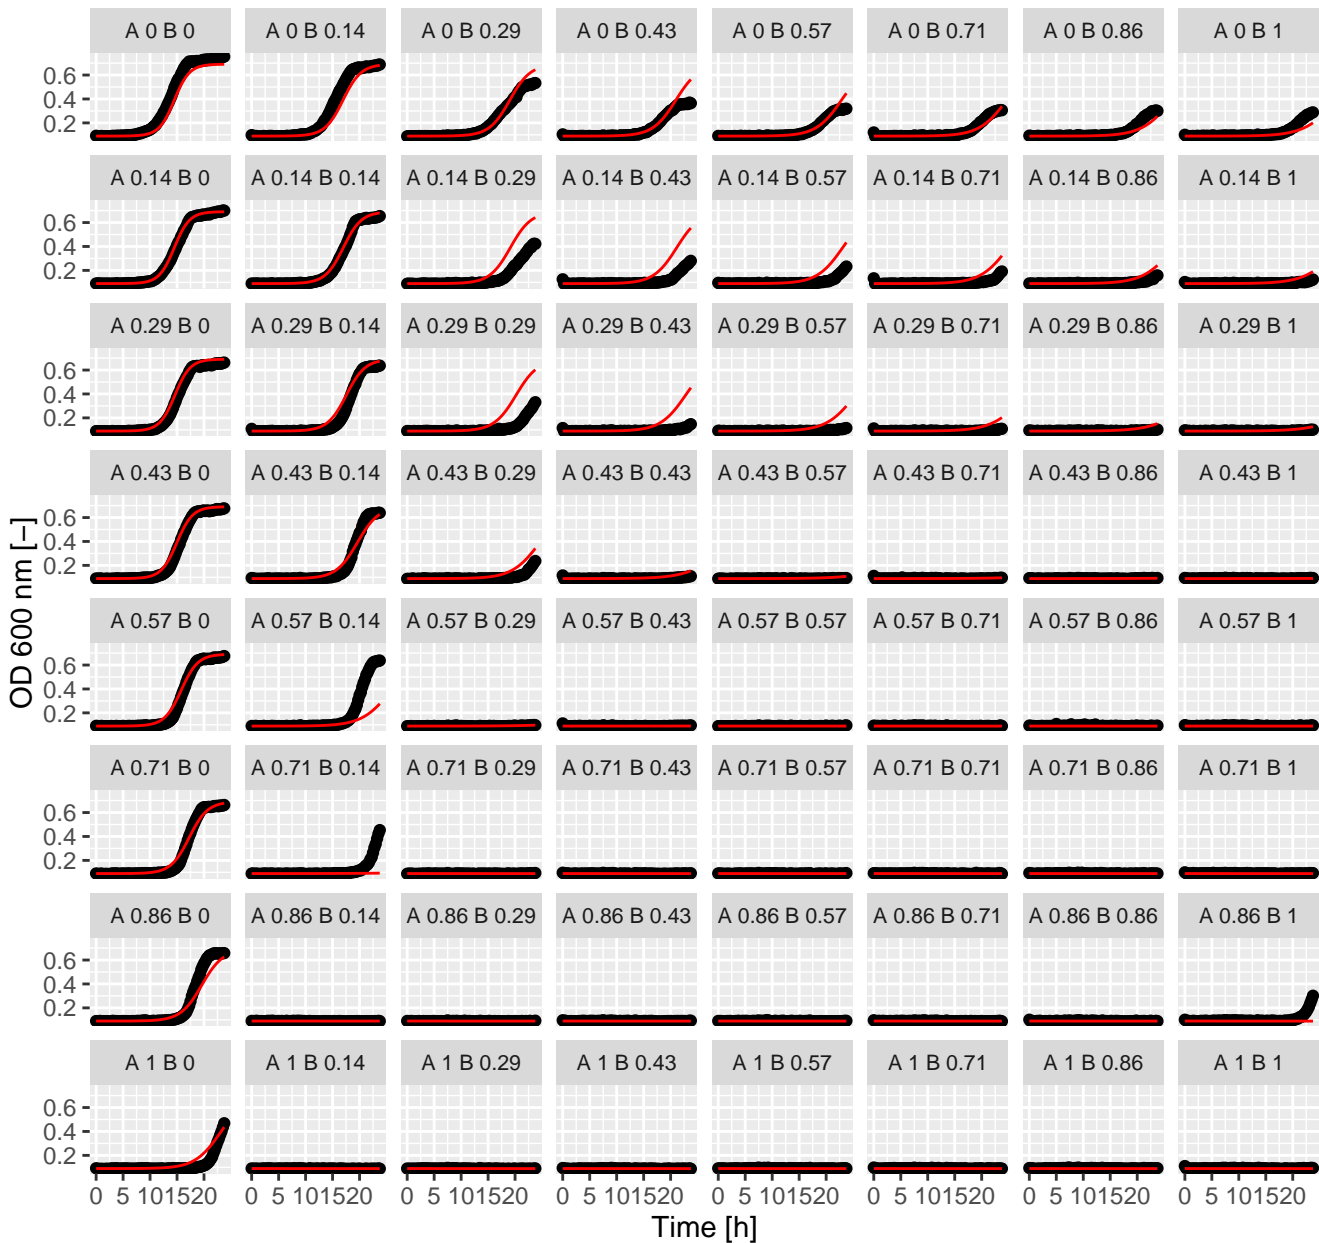

Dyc.Tun (= Ax.Bx) Emp. Bliss  
beta = -0.07

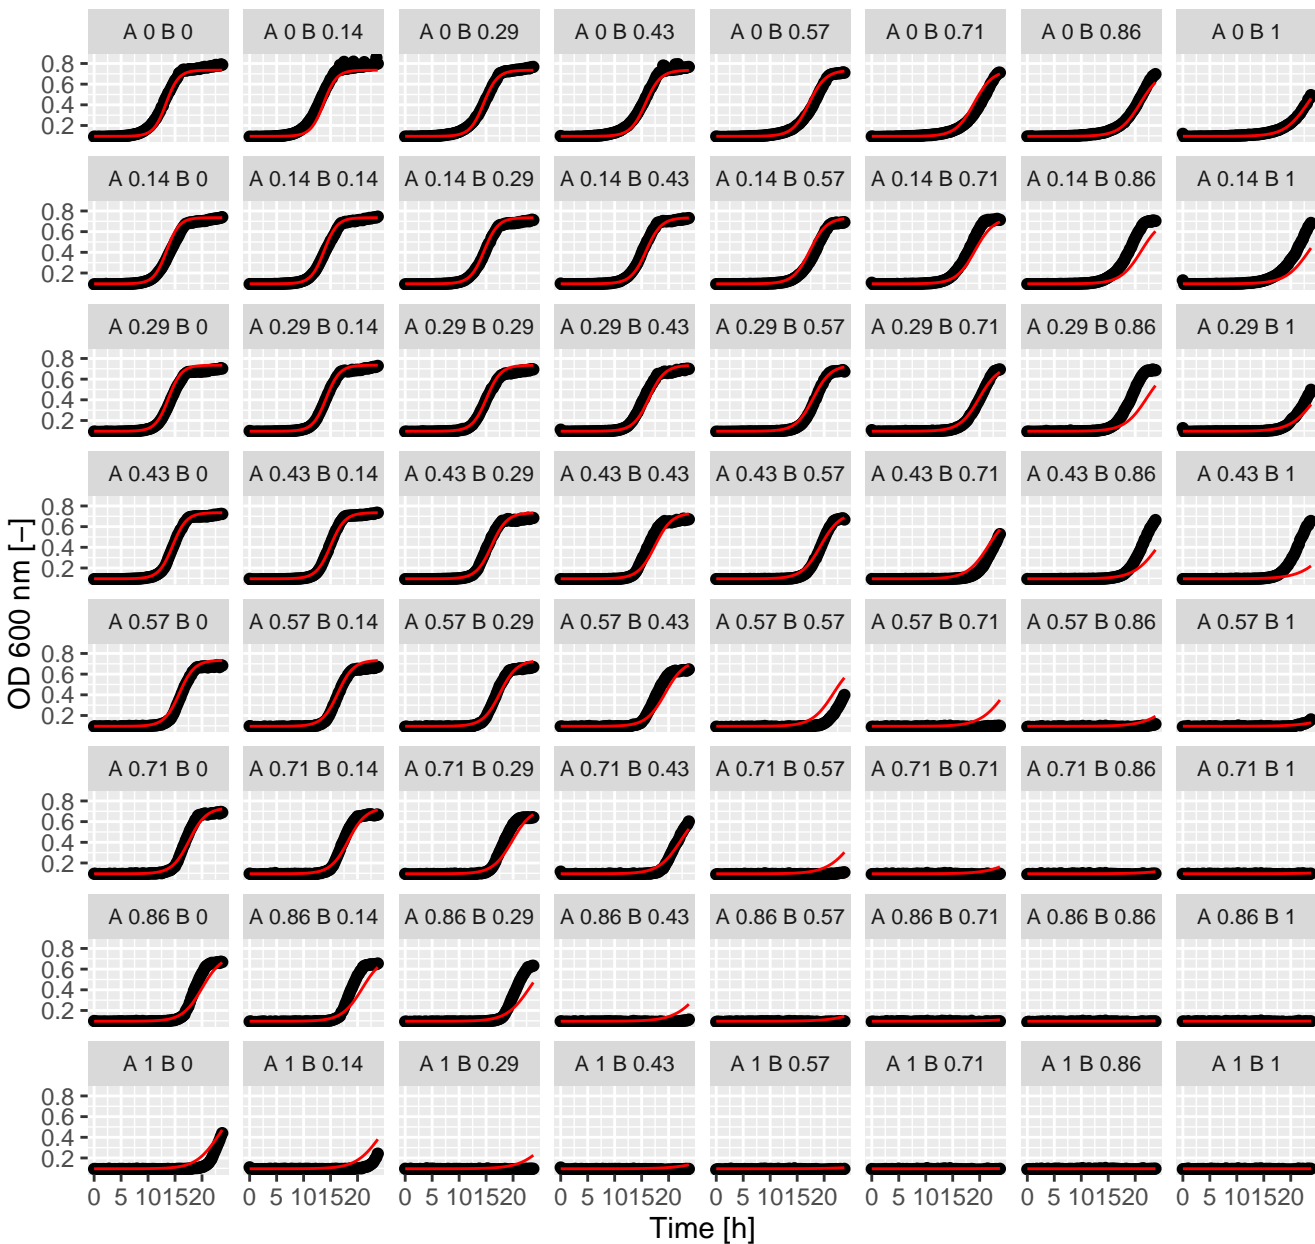

Fen.Fen (= Ax.Bx) Emp. Bliss  
beta = -2.83

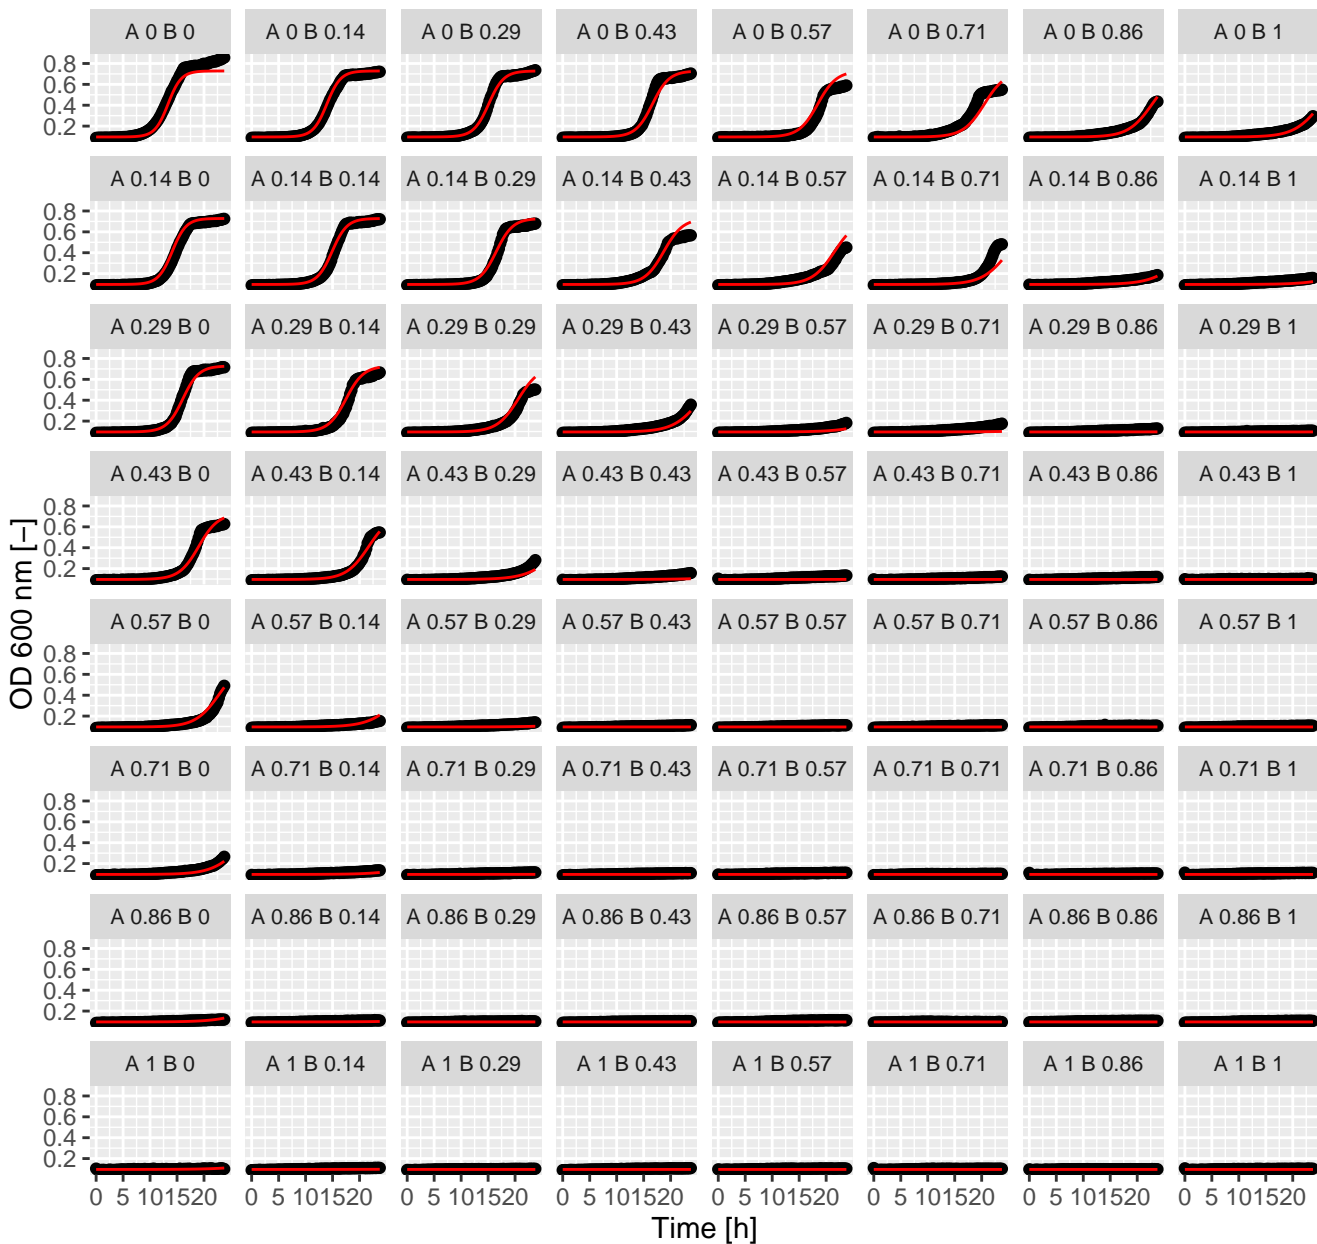

Fen.Hal (= Ax.Bx) Emp. Bliss  
beta = -14.69

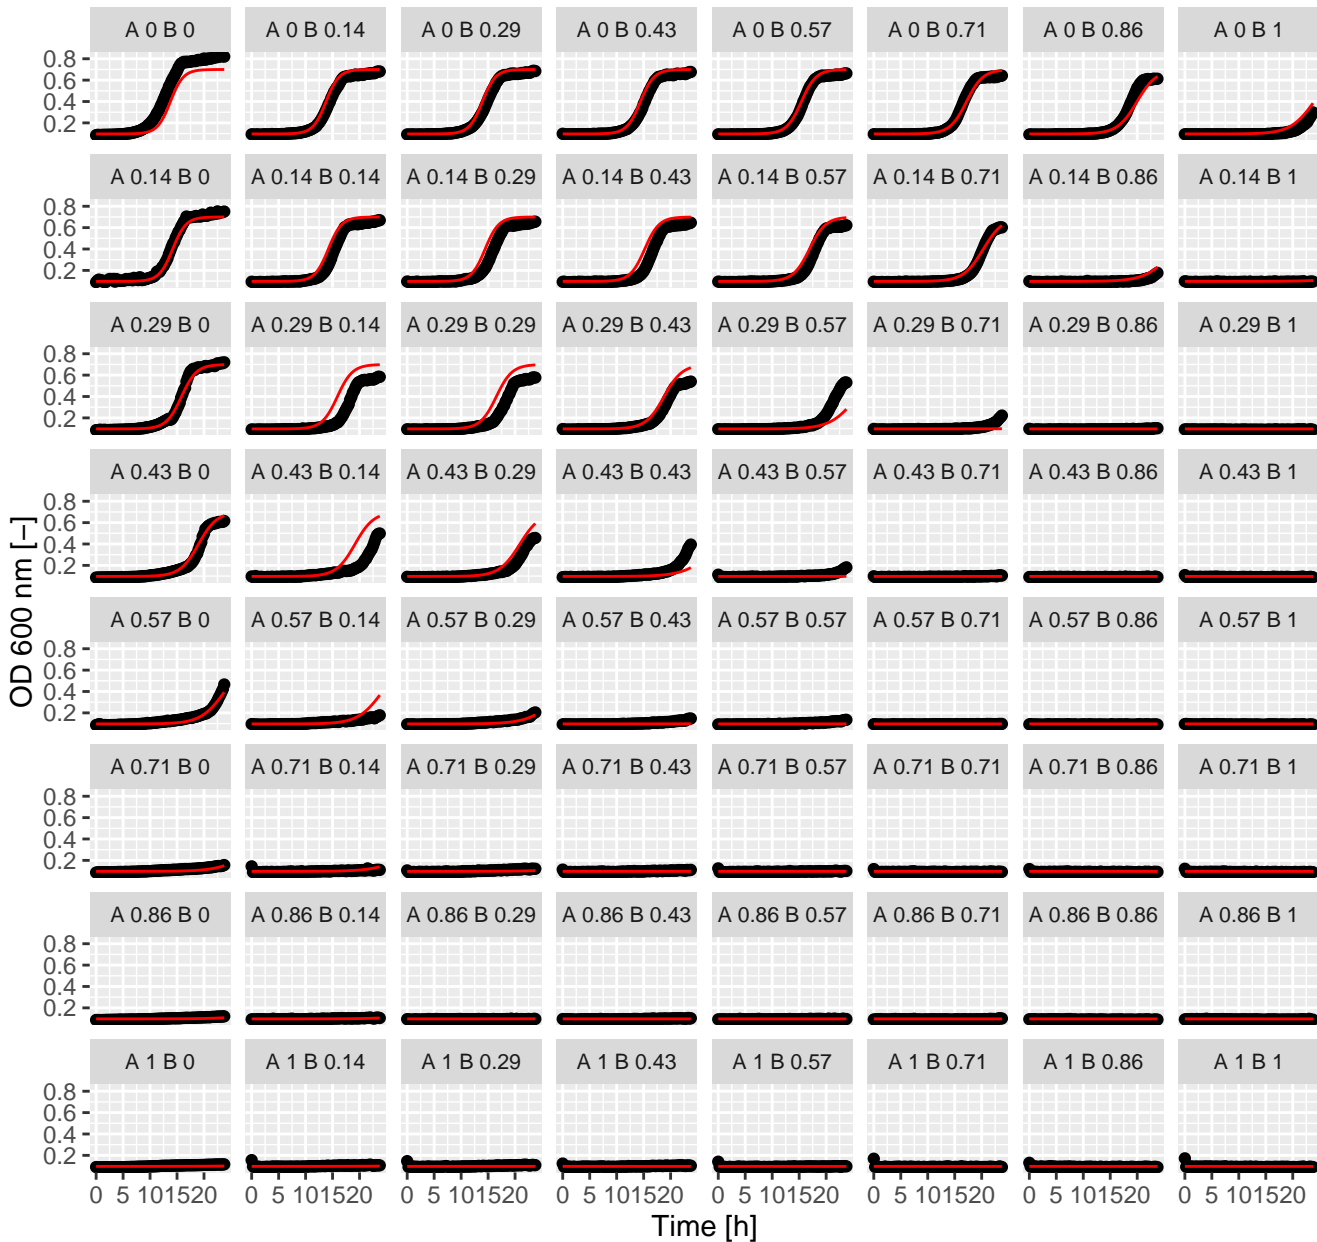

Fen.Lat (= Ax.Bx) Emp. Bliss  
beta = -5730

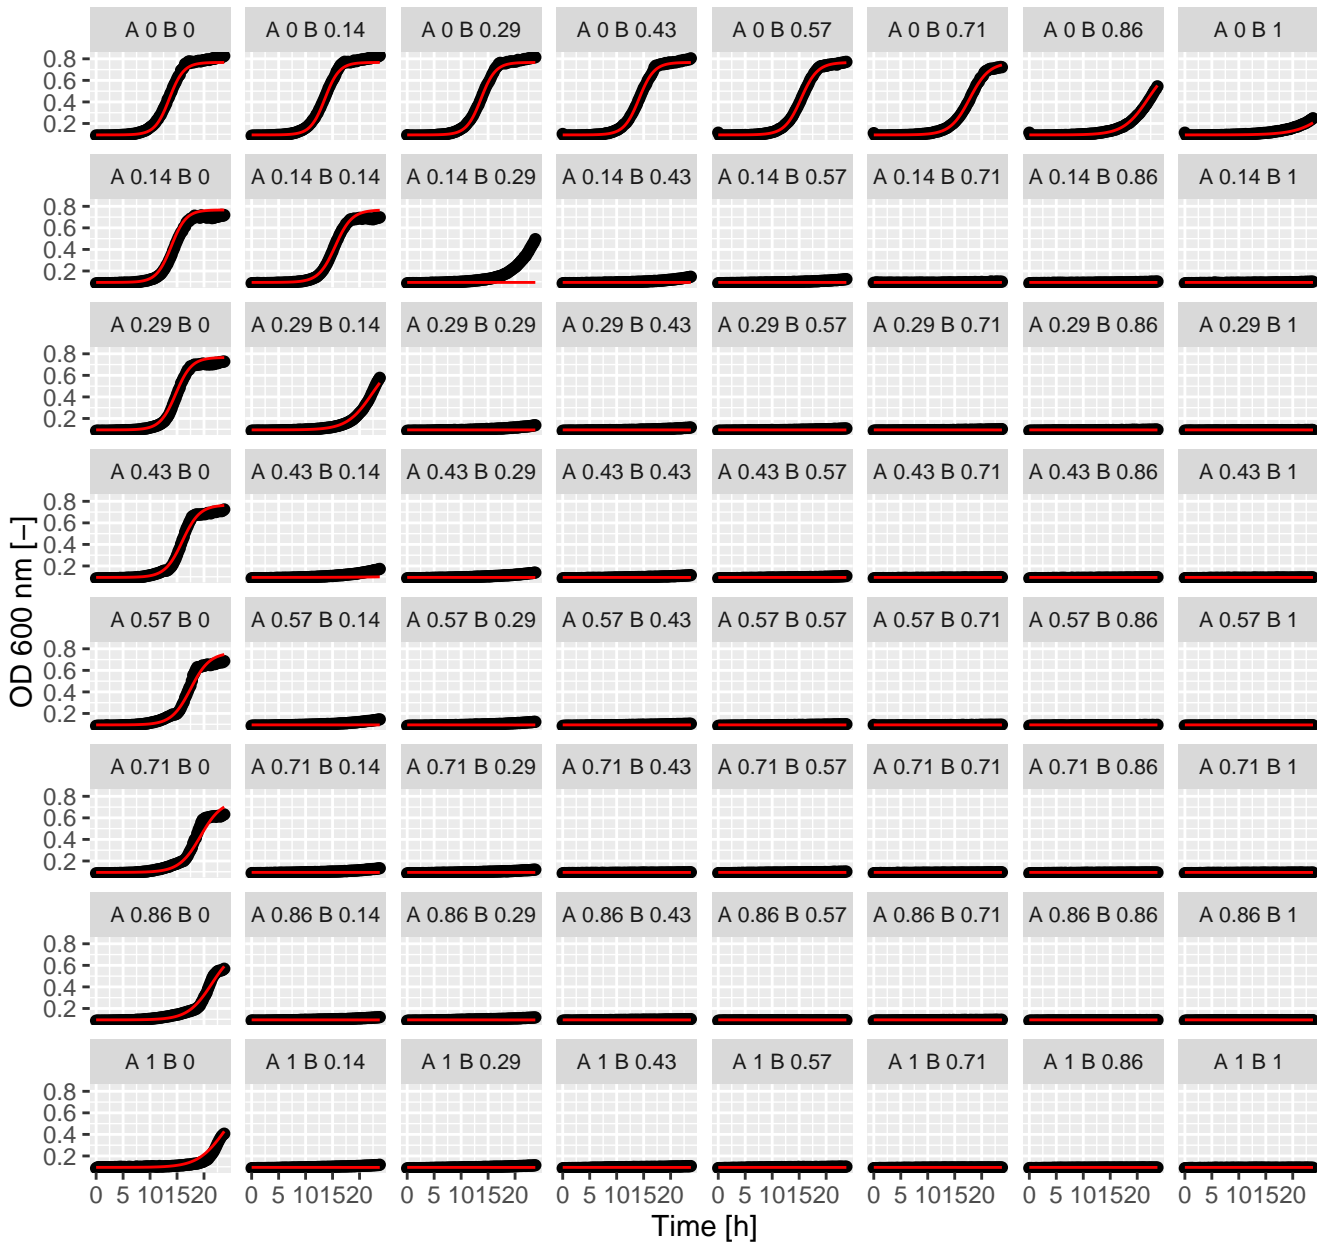

Fen.Pen (= Ax.Bx) Emp. Bliss  
beta = -6.06

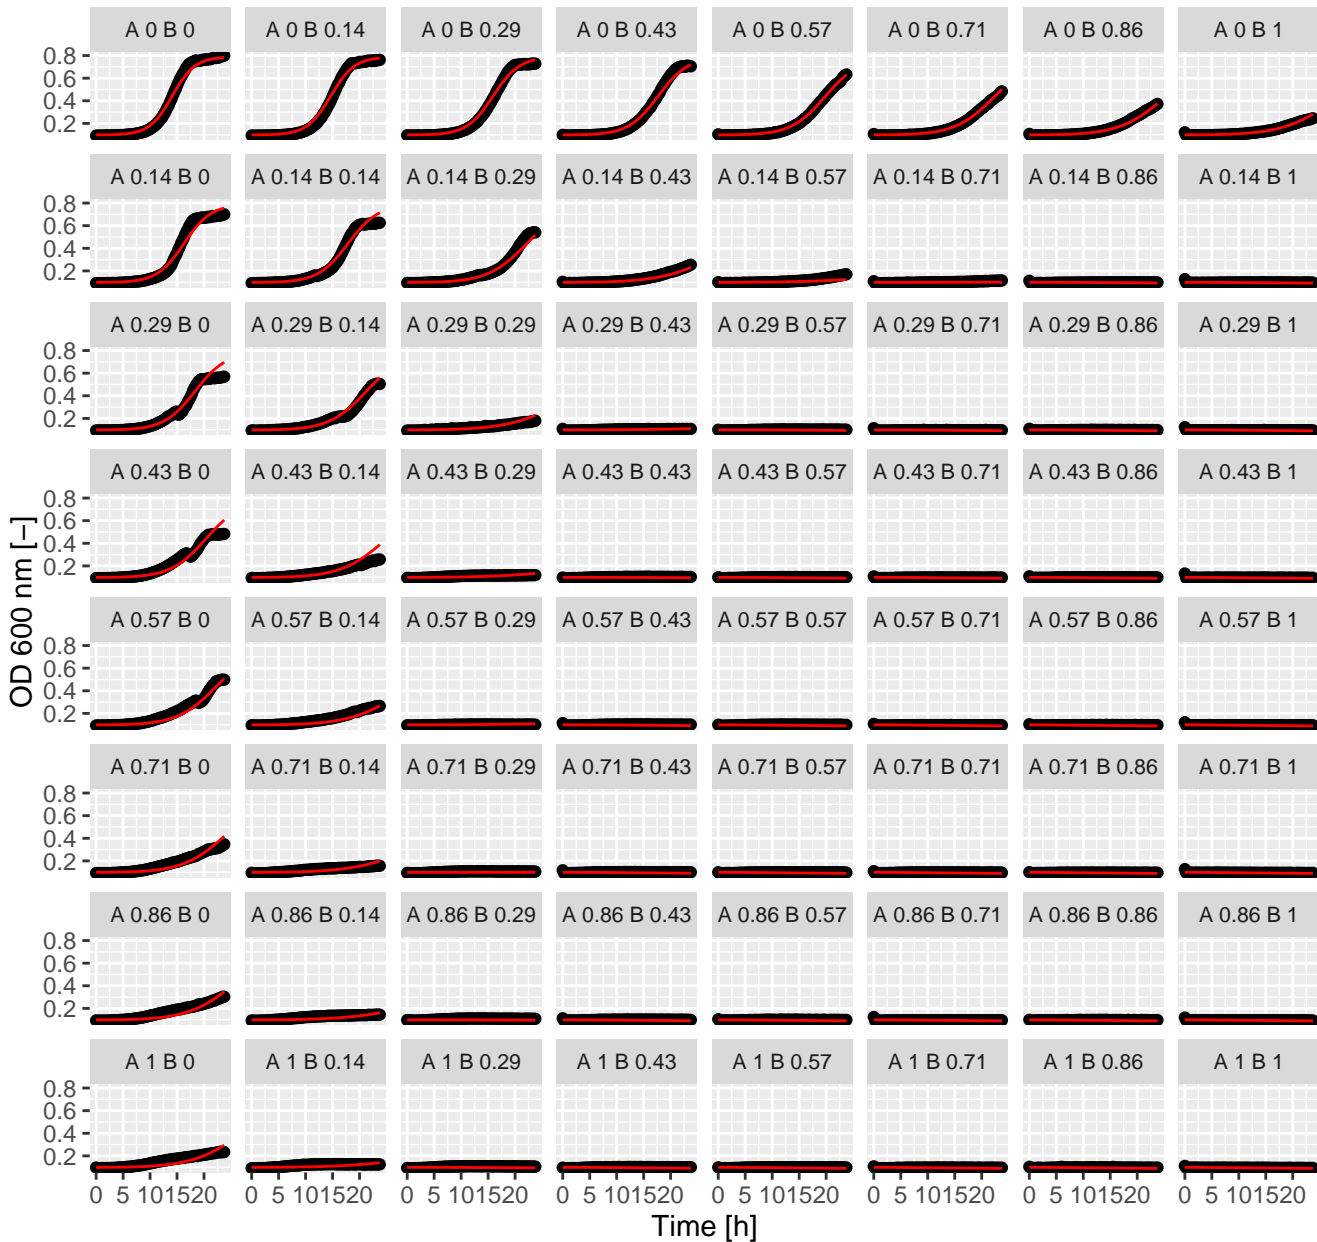



Fen.Rap (= Ax.Bx) Emp. Bliss  
beta = -1038

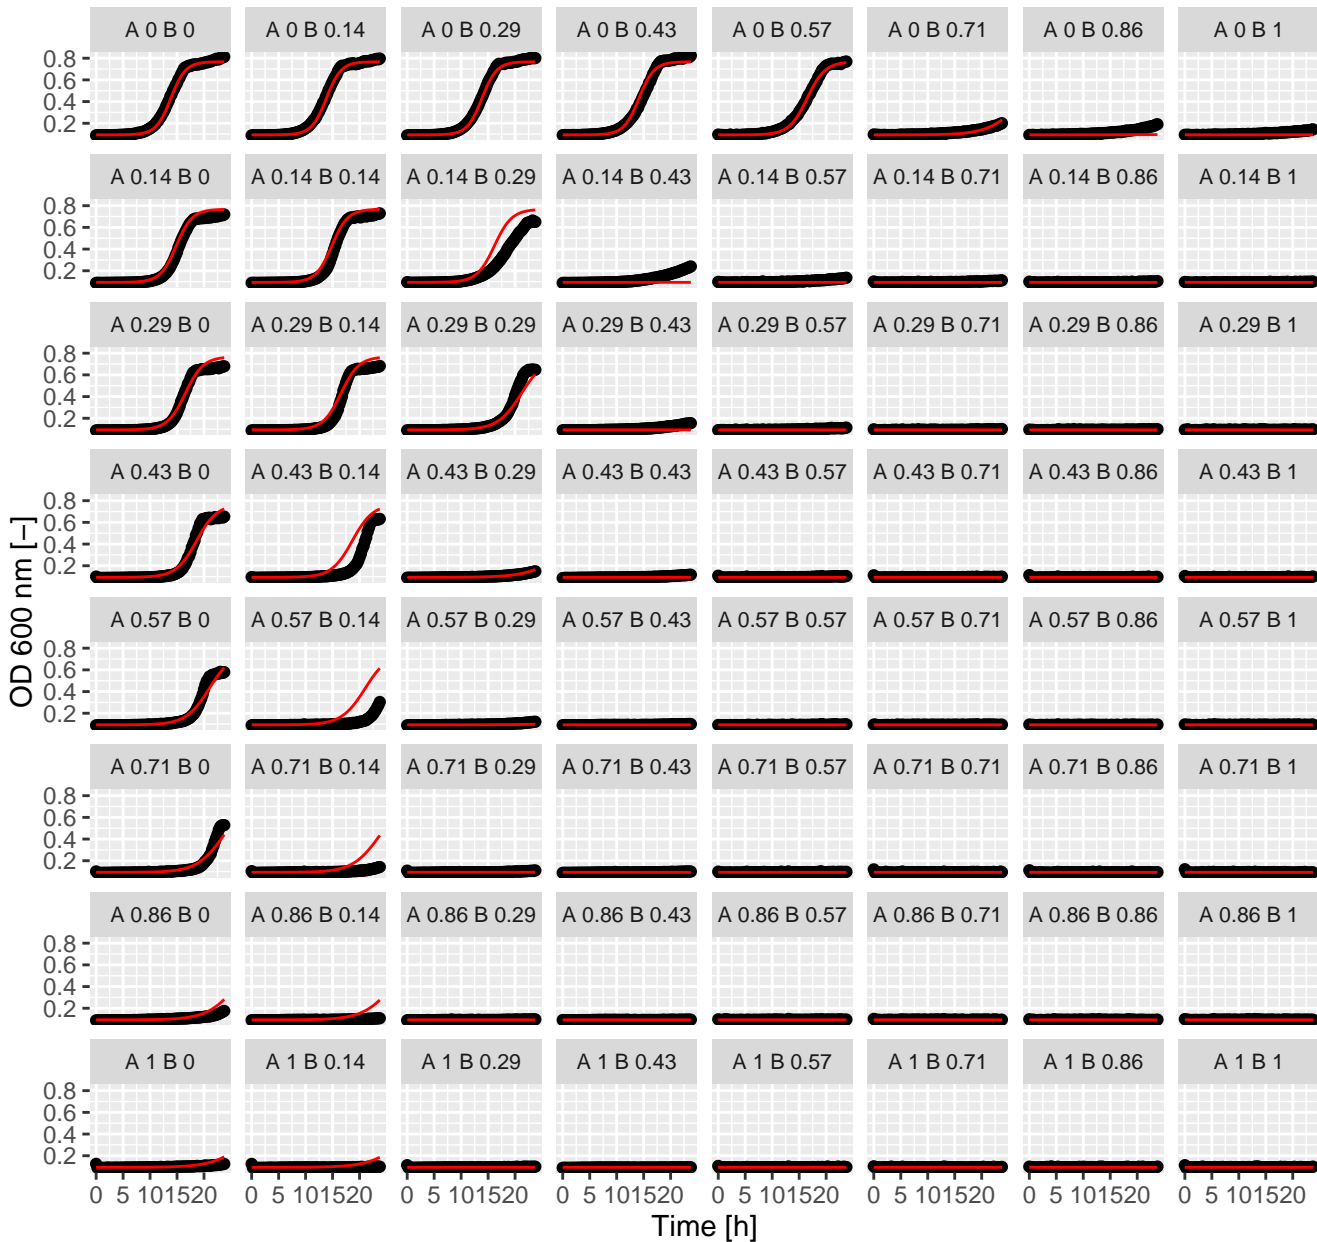

## Fen.Sta (= Ax.Bx) Emp. Bliss

beta = -414.95

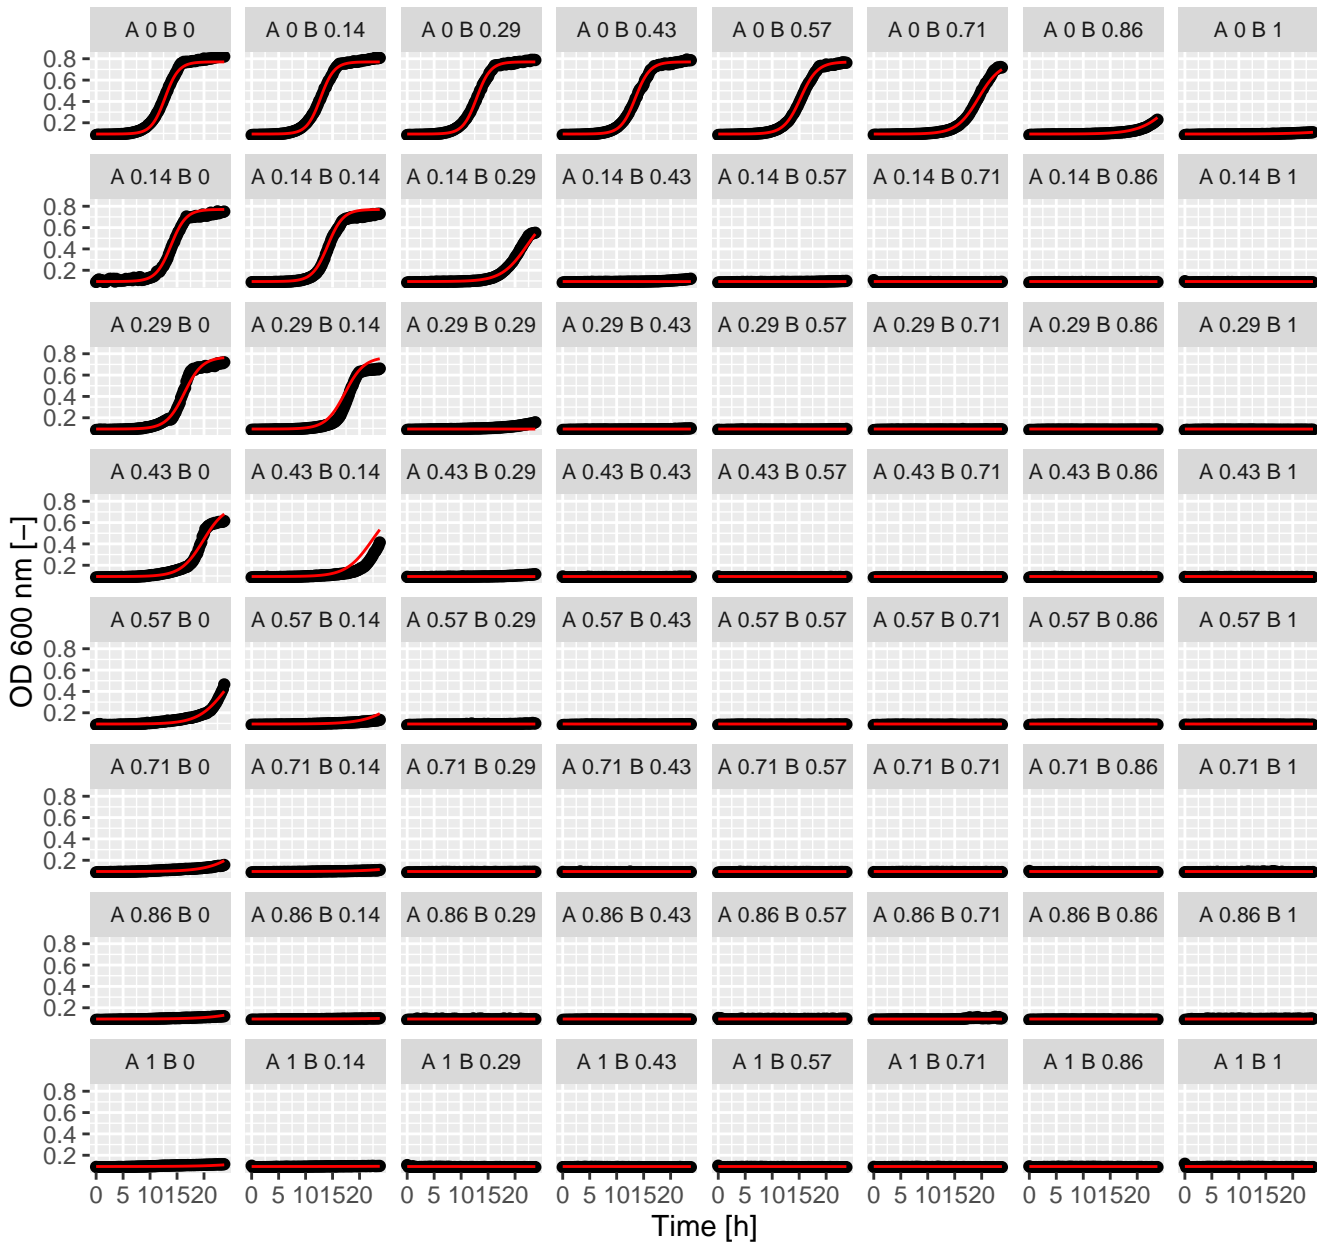

Fen.Tac (= Ax.Bx) Emp. Bliss  
beta = -139.7

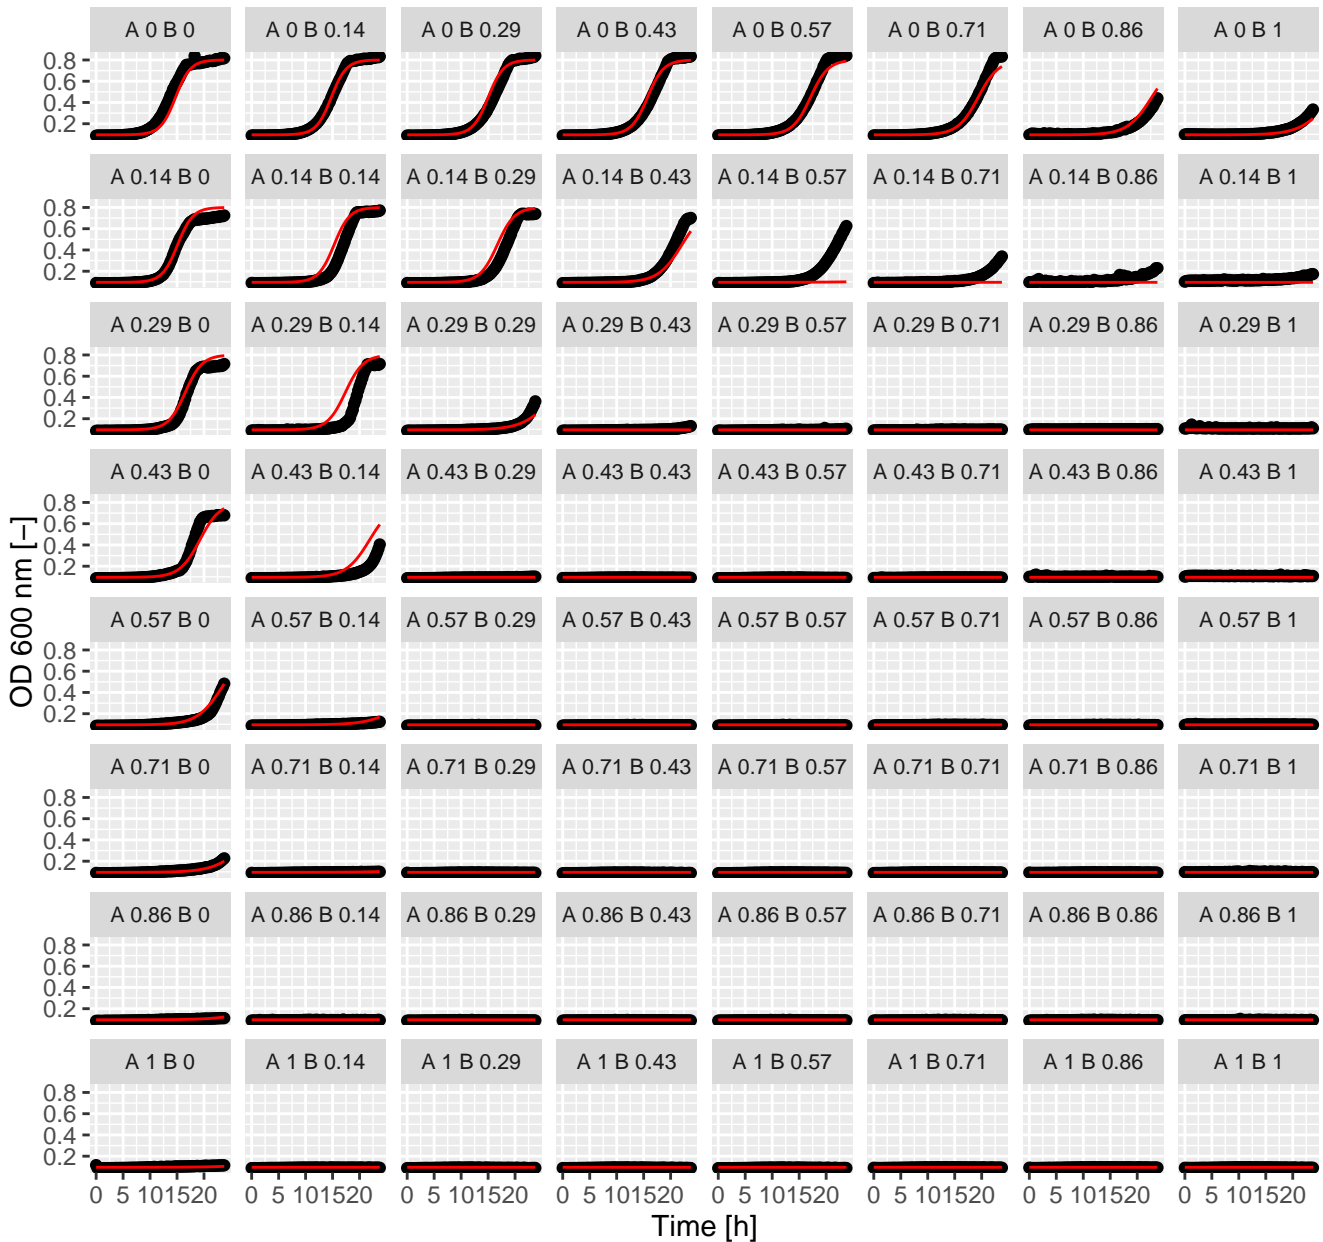

Fen.Ter (= Ax.Bx) Emp. Bliss  
beta = -3.63

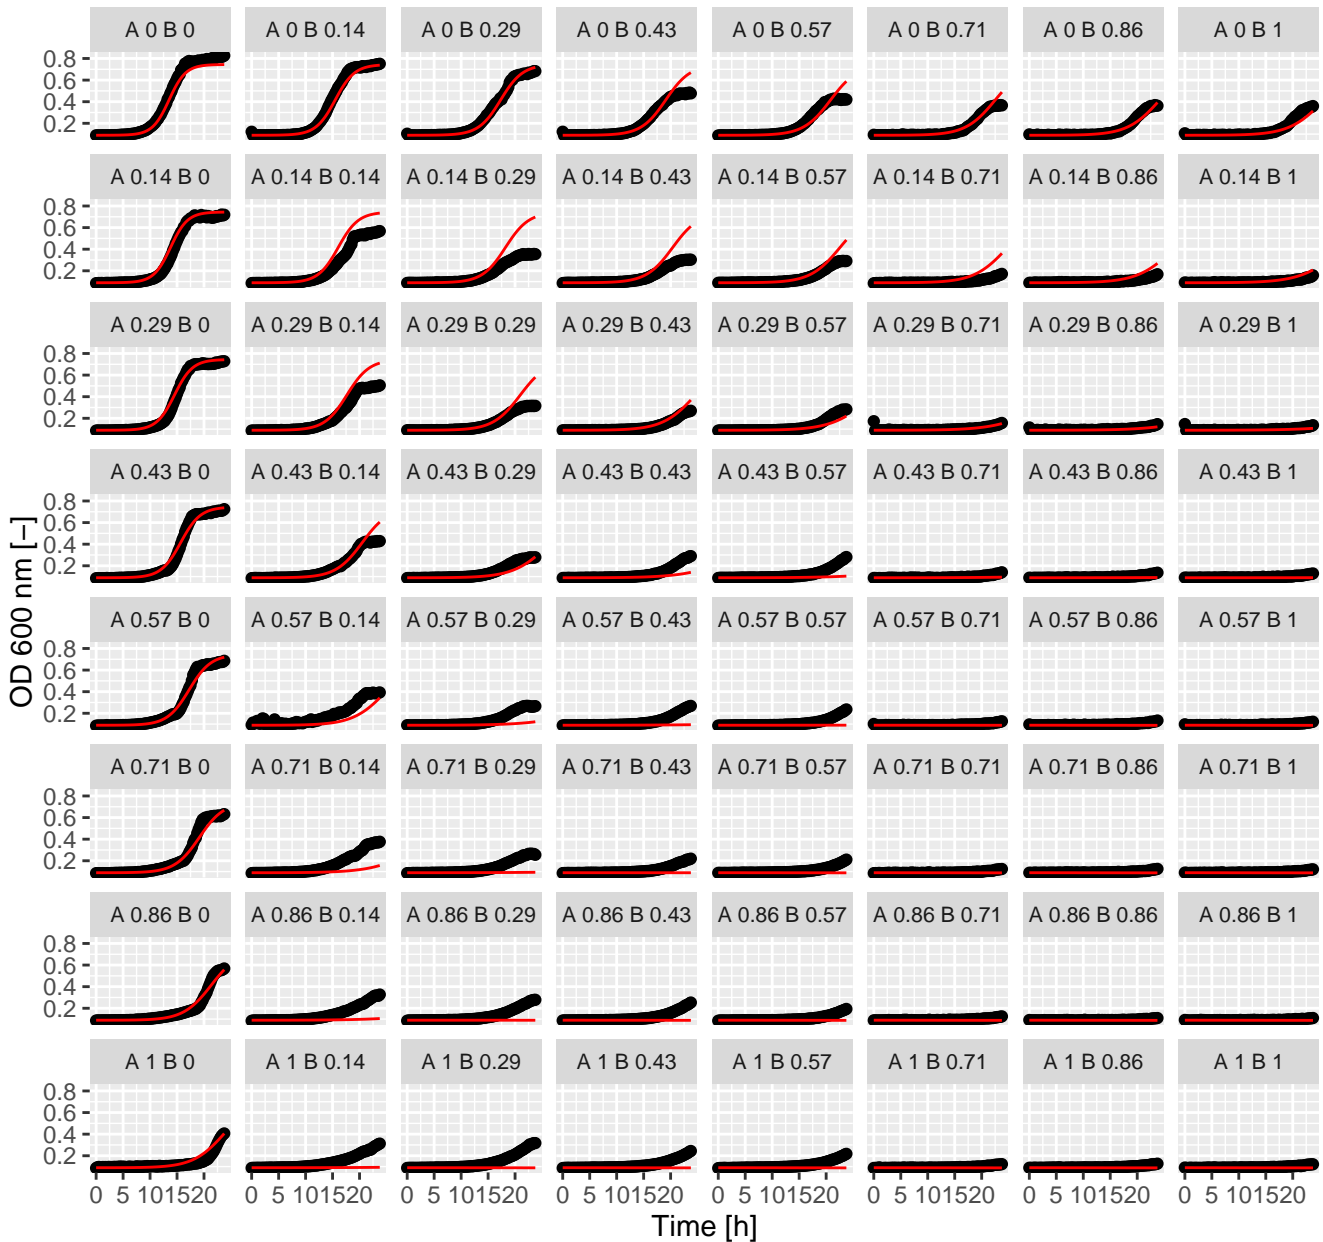

Fen.Tun (= Ax.Bx) Emp. Bliss  
beta = 1.68

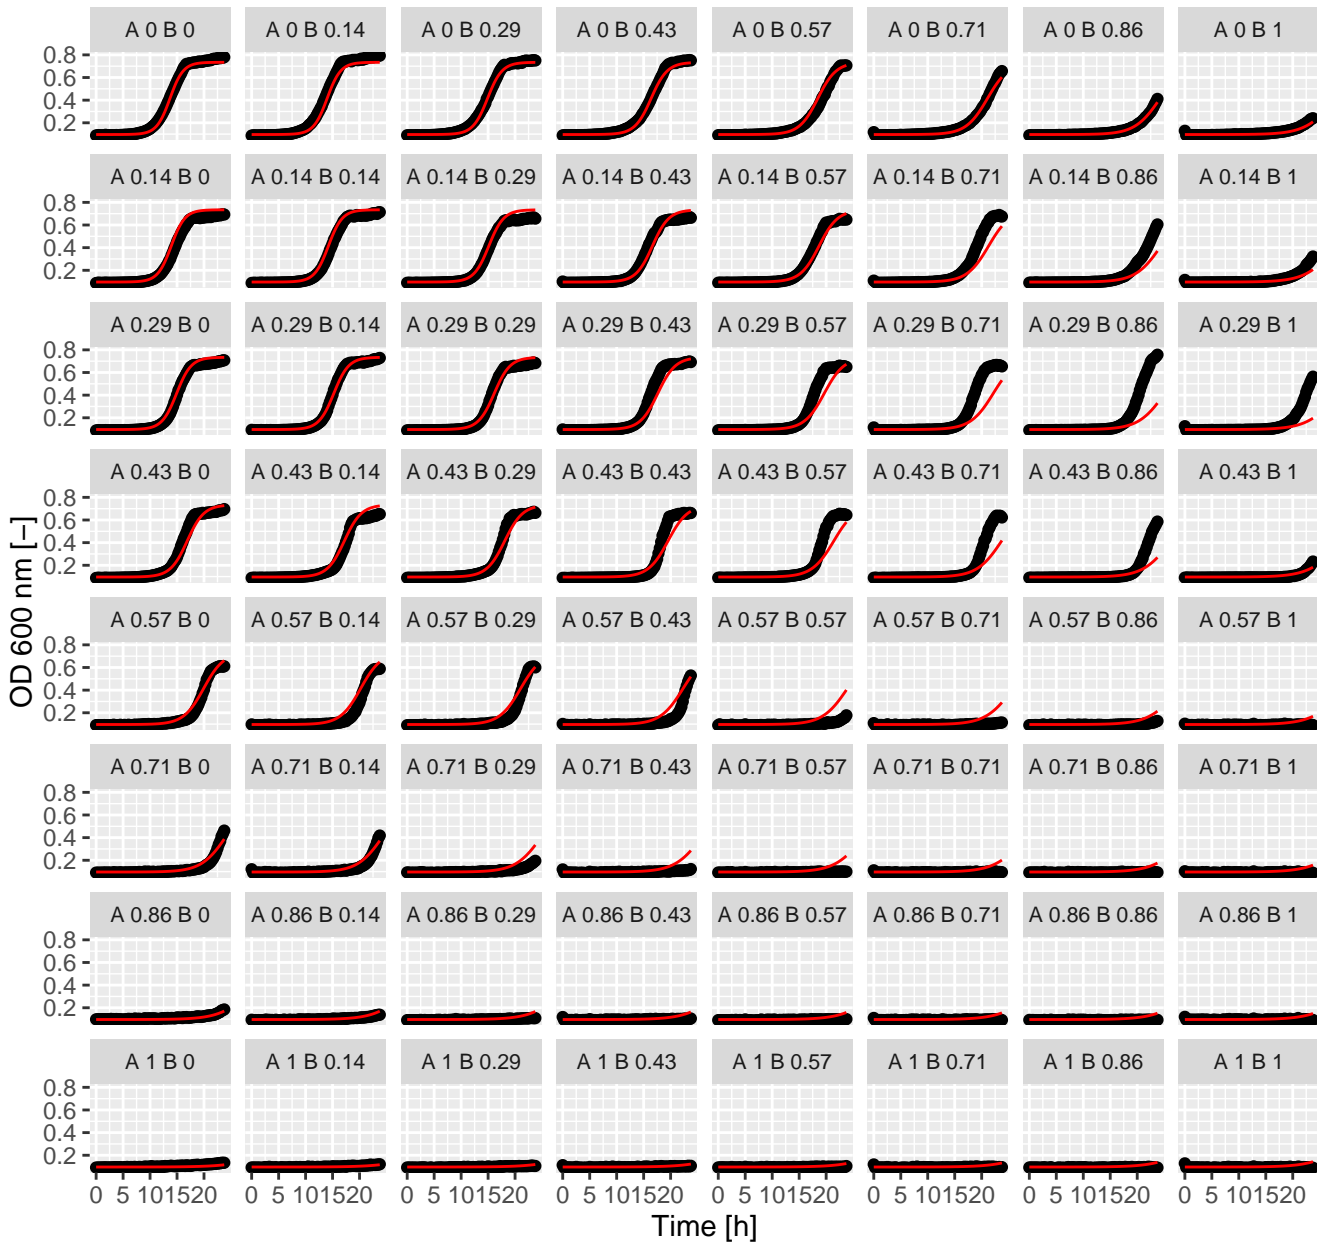

# Hal.Hal (= Ax.Bx) Emp. Bliss beta = -958

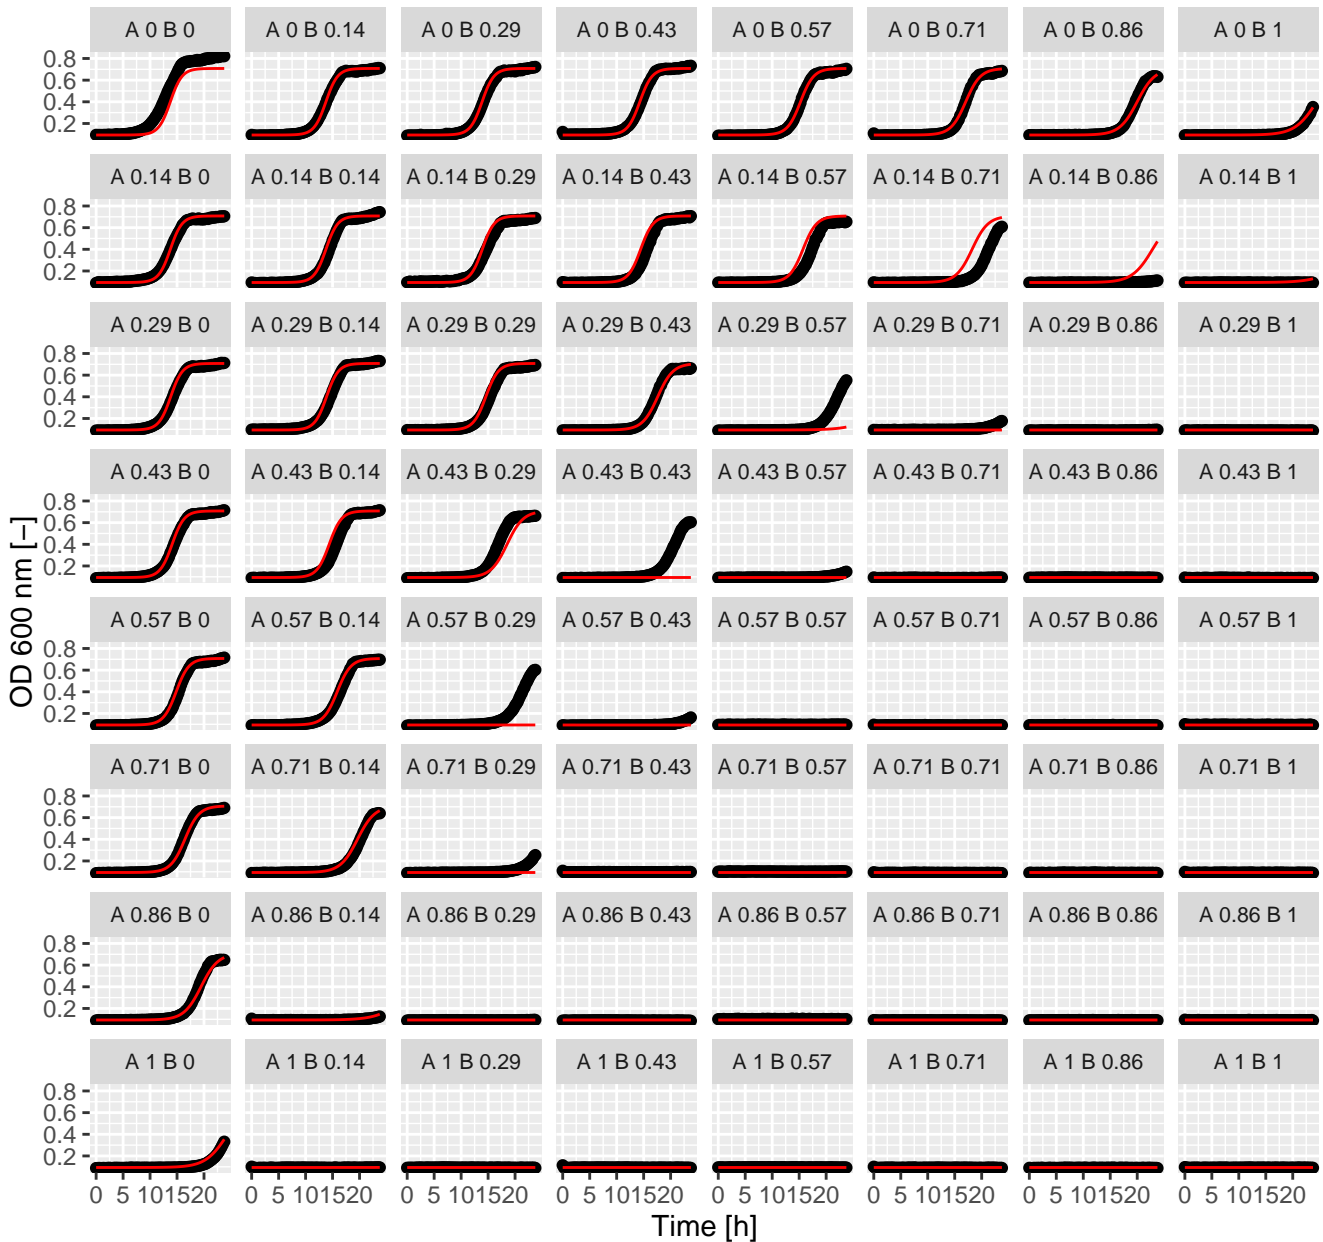



Hal.Pen (= Ax.Bx) Emp. Bliss  
beta = -201.6

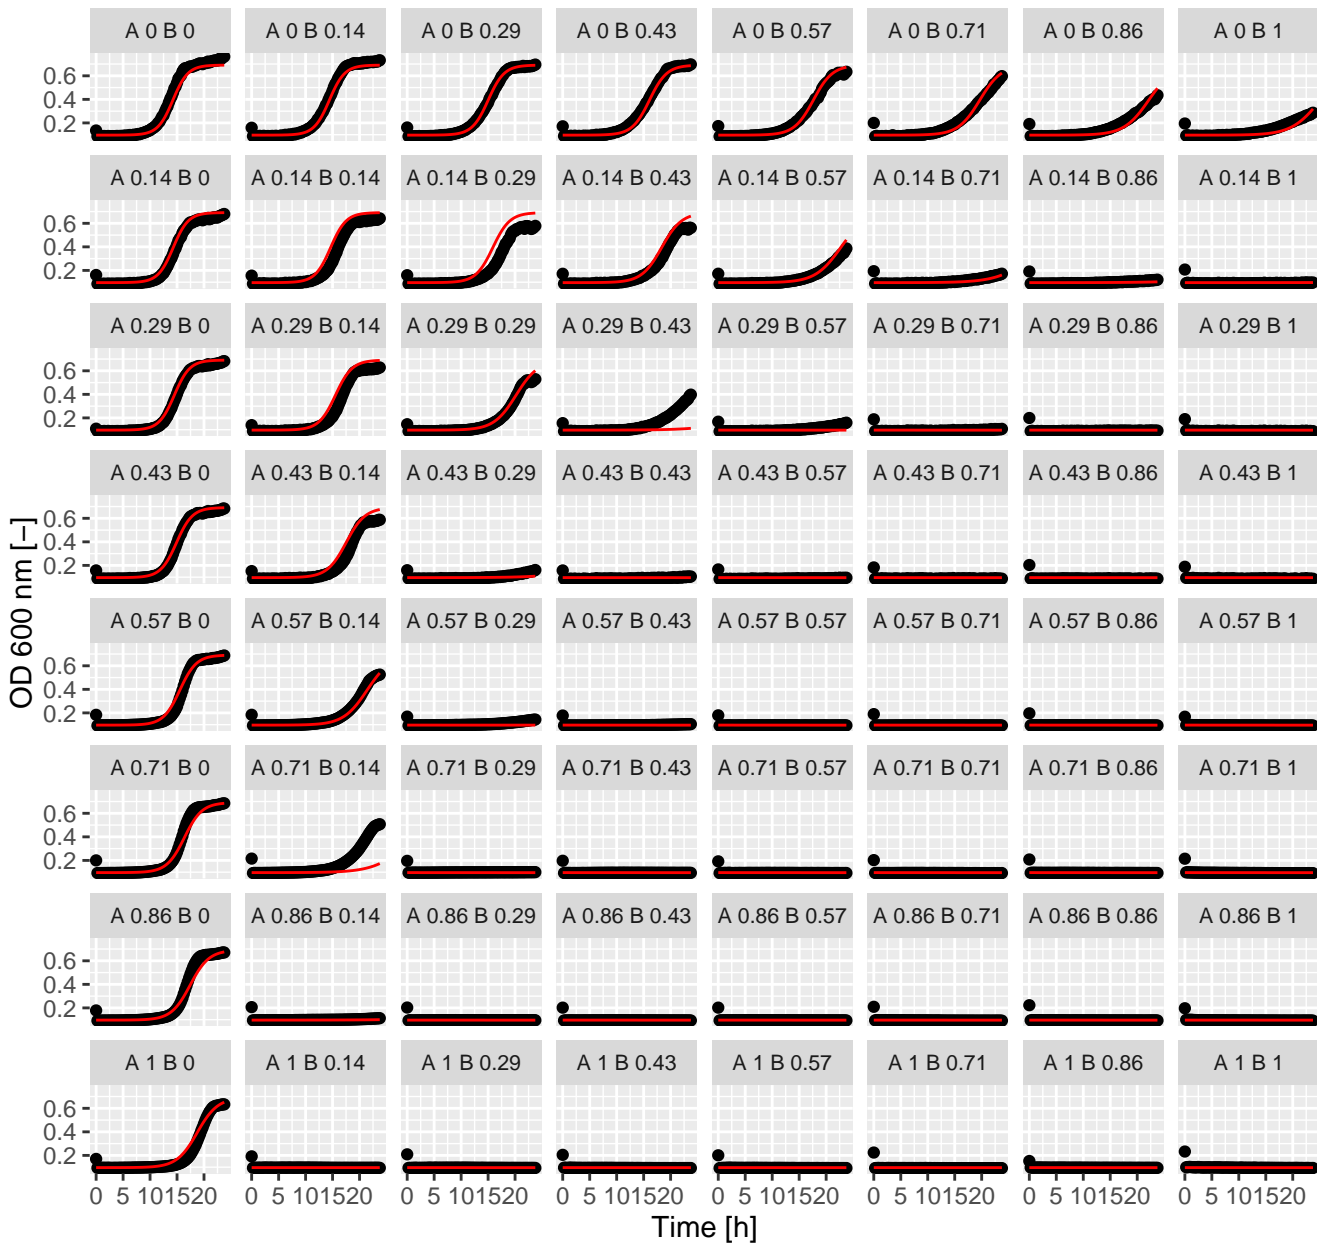



Hal.Rap (= Ax.Bx) Emp. Bliss  
beta = -14771.6

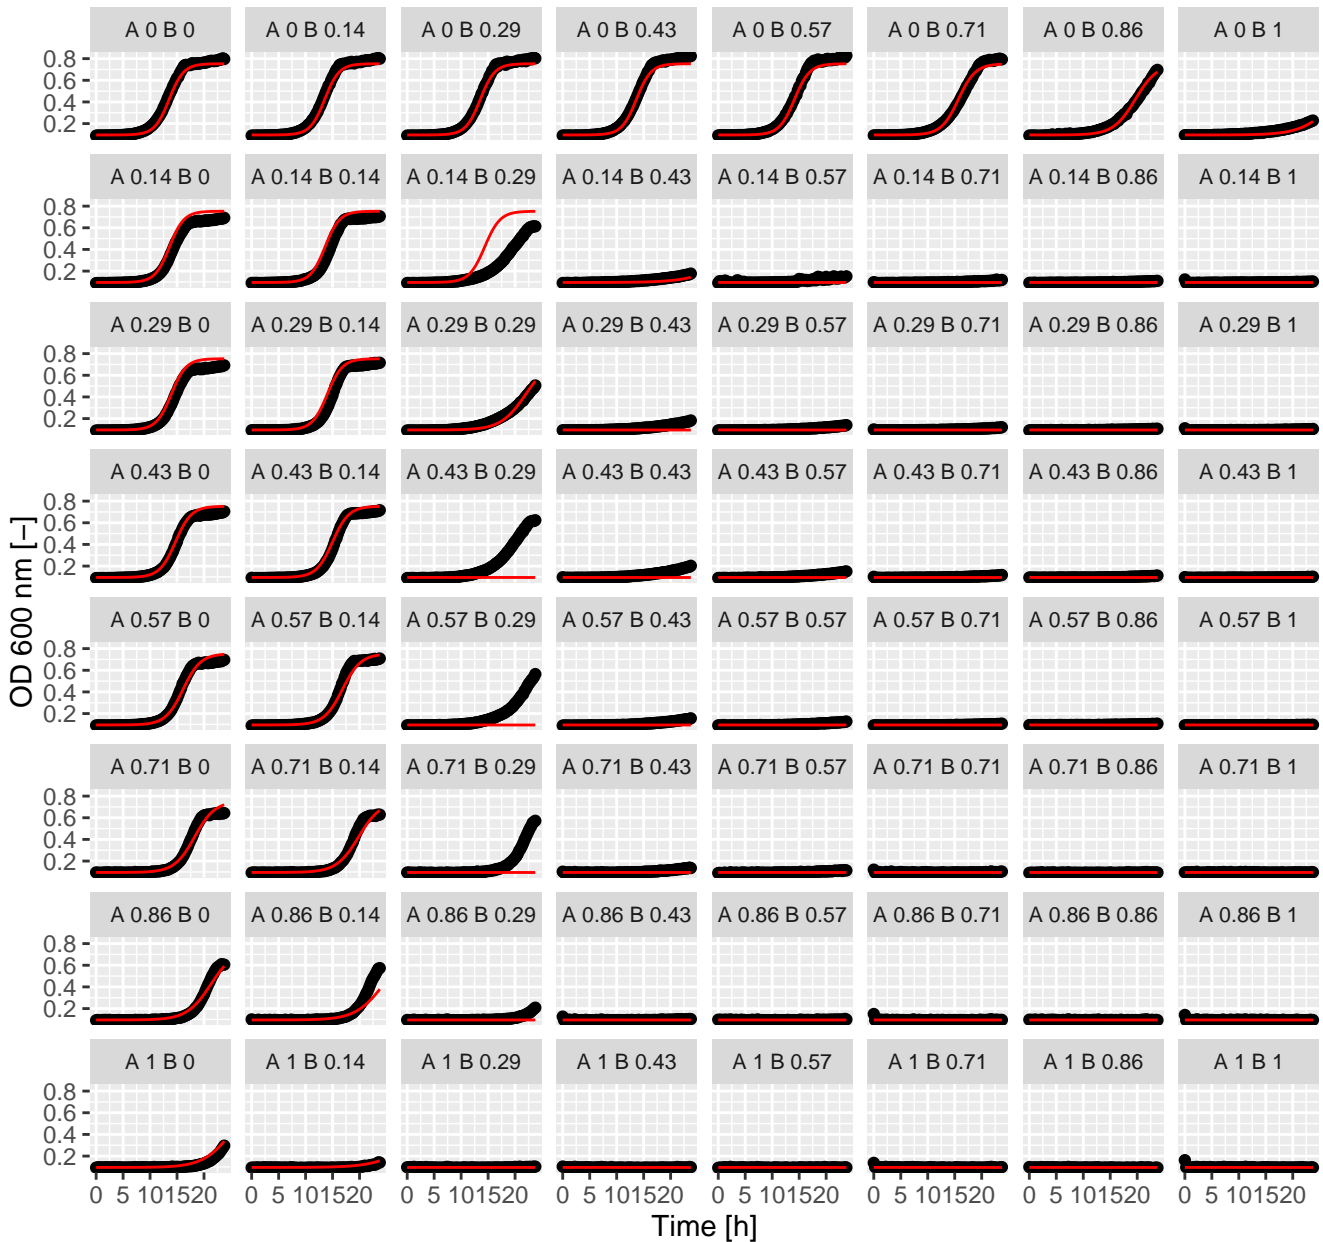

Hal.Sta (= Ax.Bx) Emp. Bliss  
beta = -3723.6

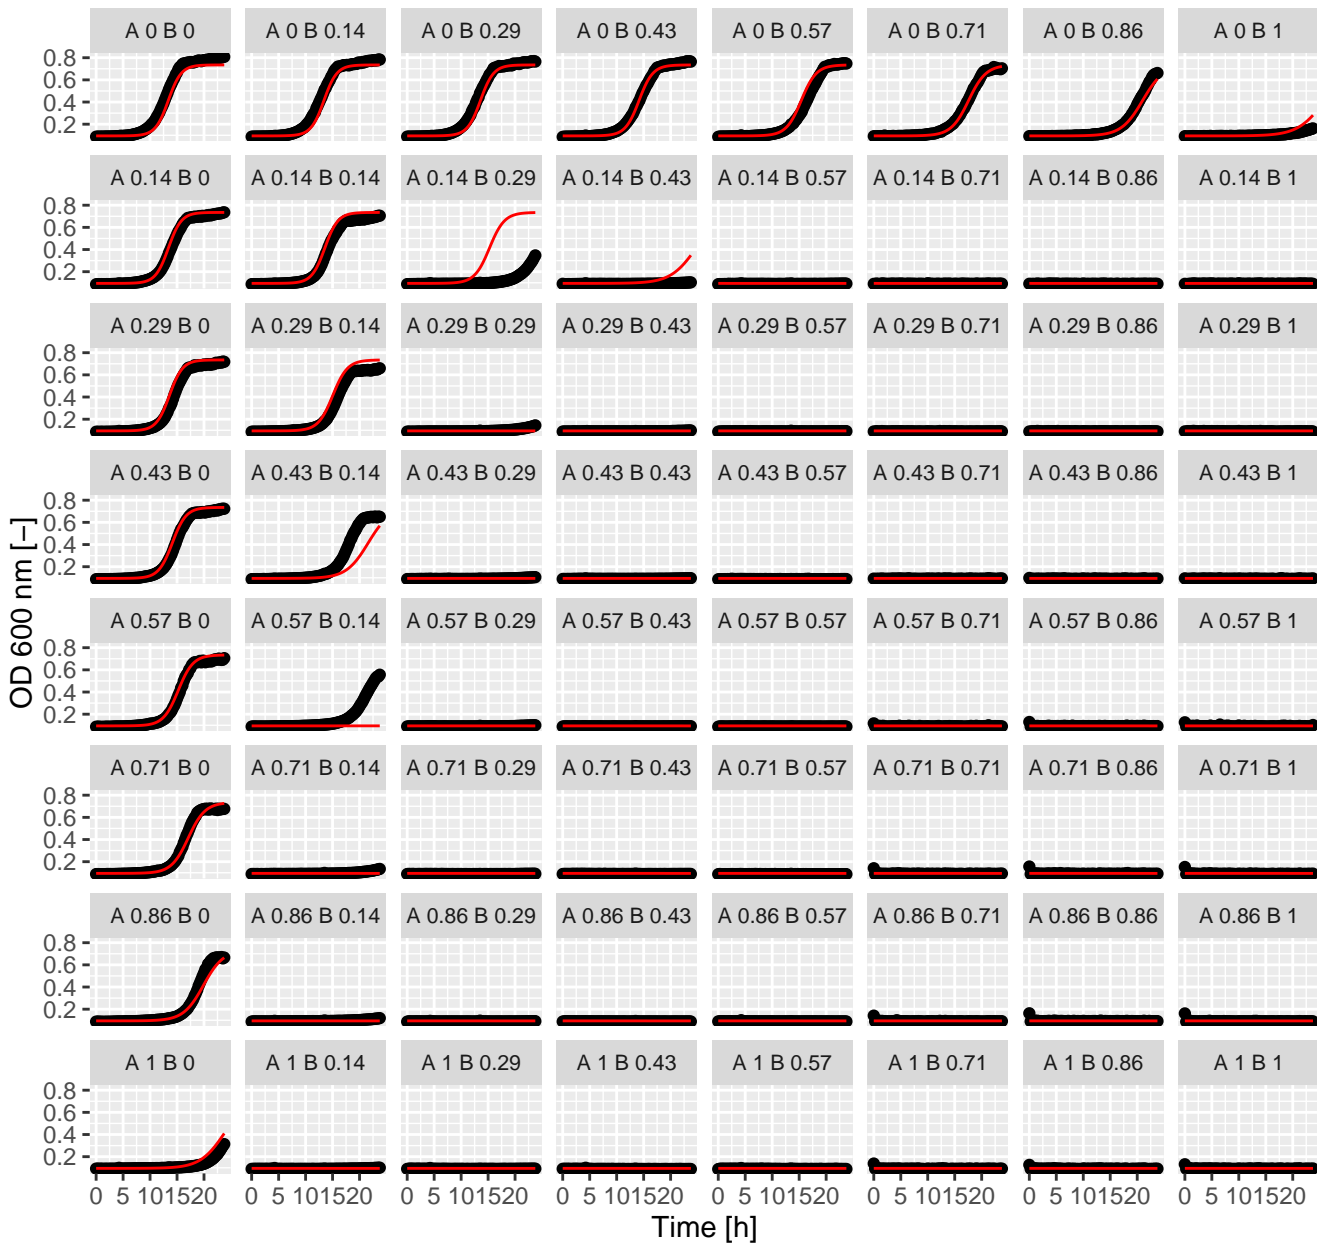

# Hal.Tac (= Ax.Bx) Emp. Bliss

beta = -5978

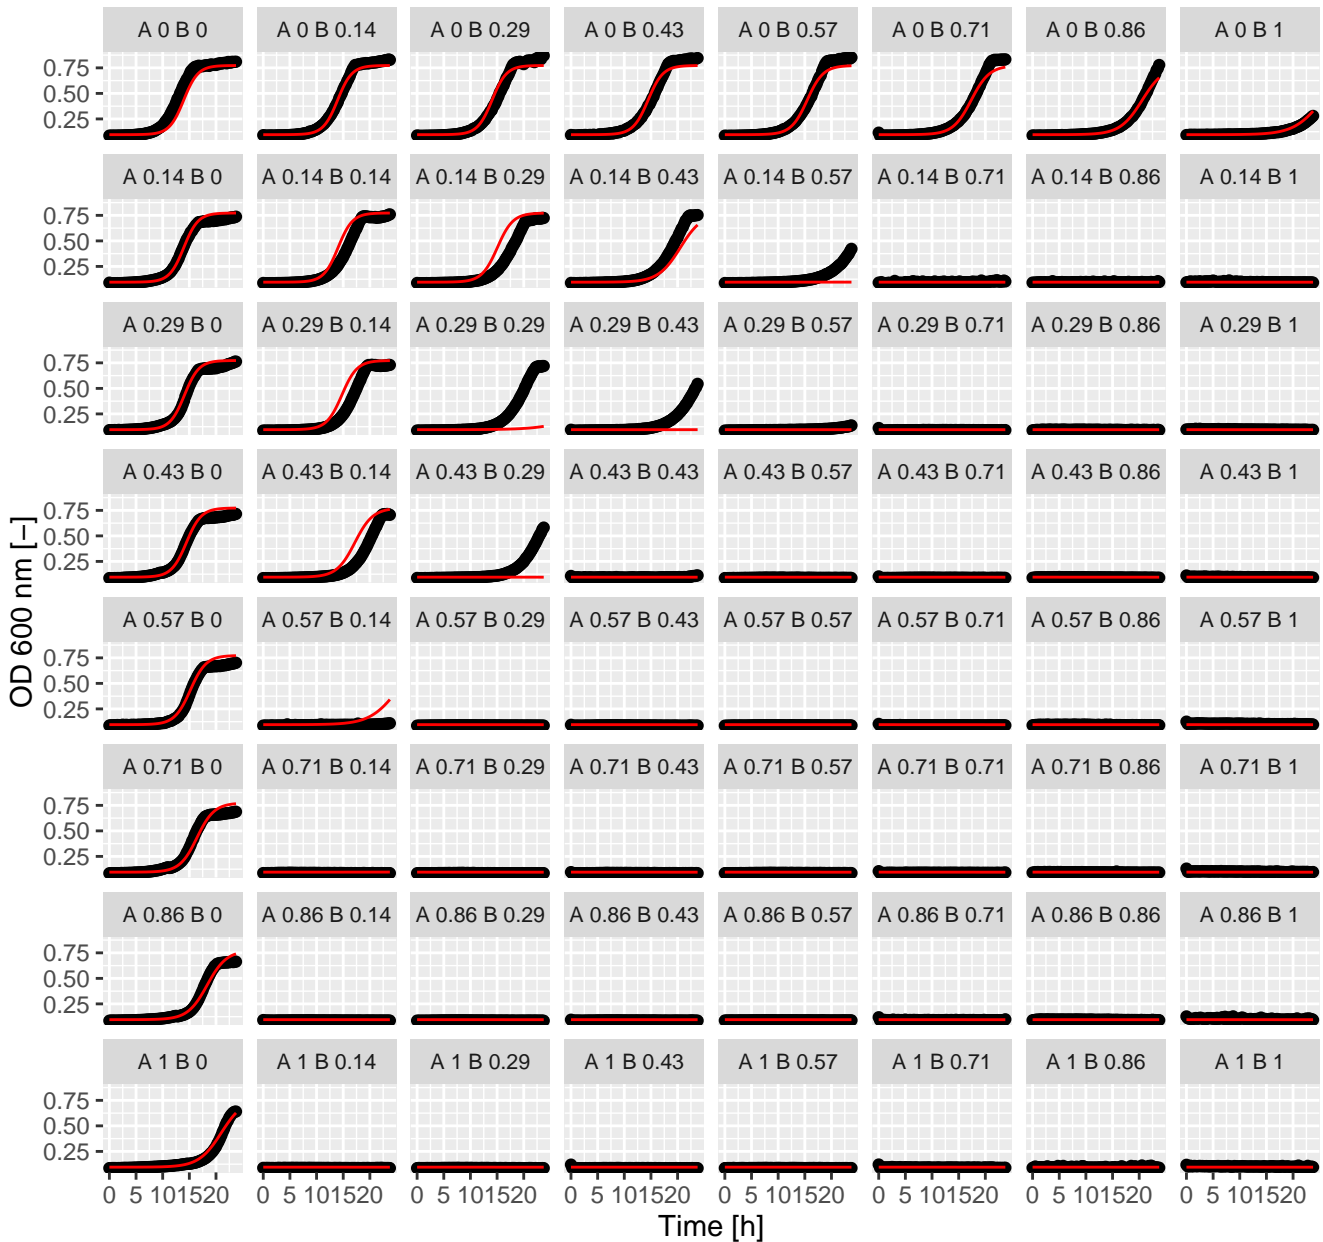

Hal.Ter (= Ax.Bx) Emp. Bliss  
beta = -14.62

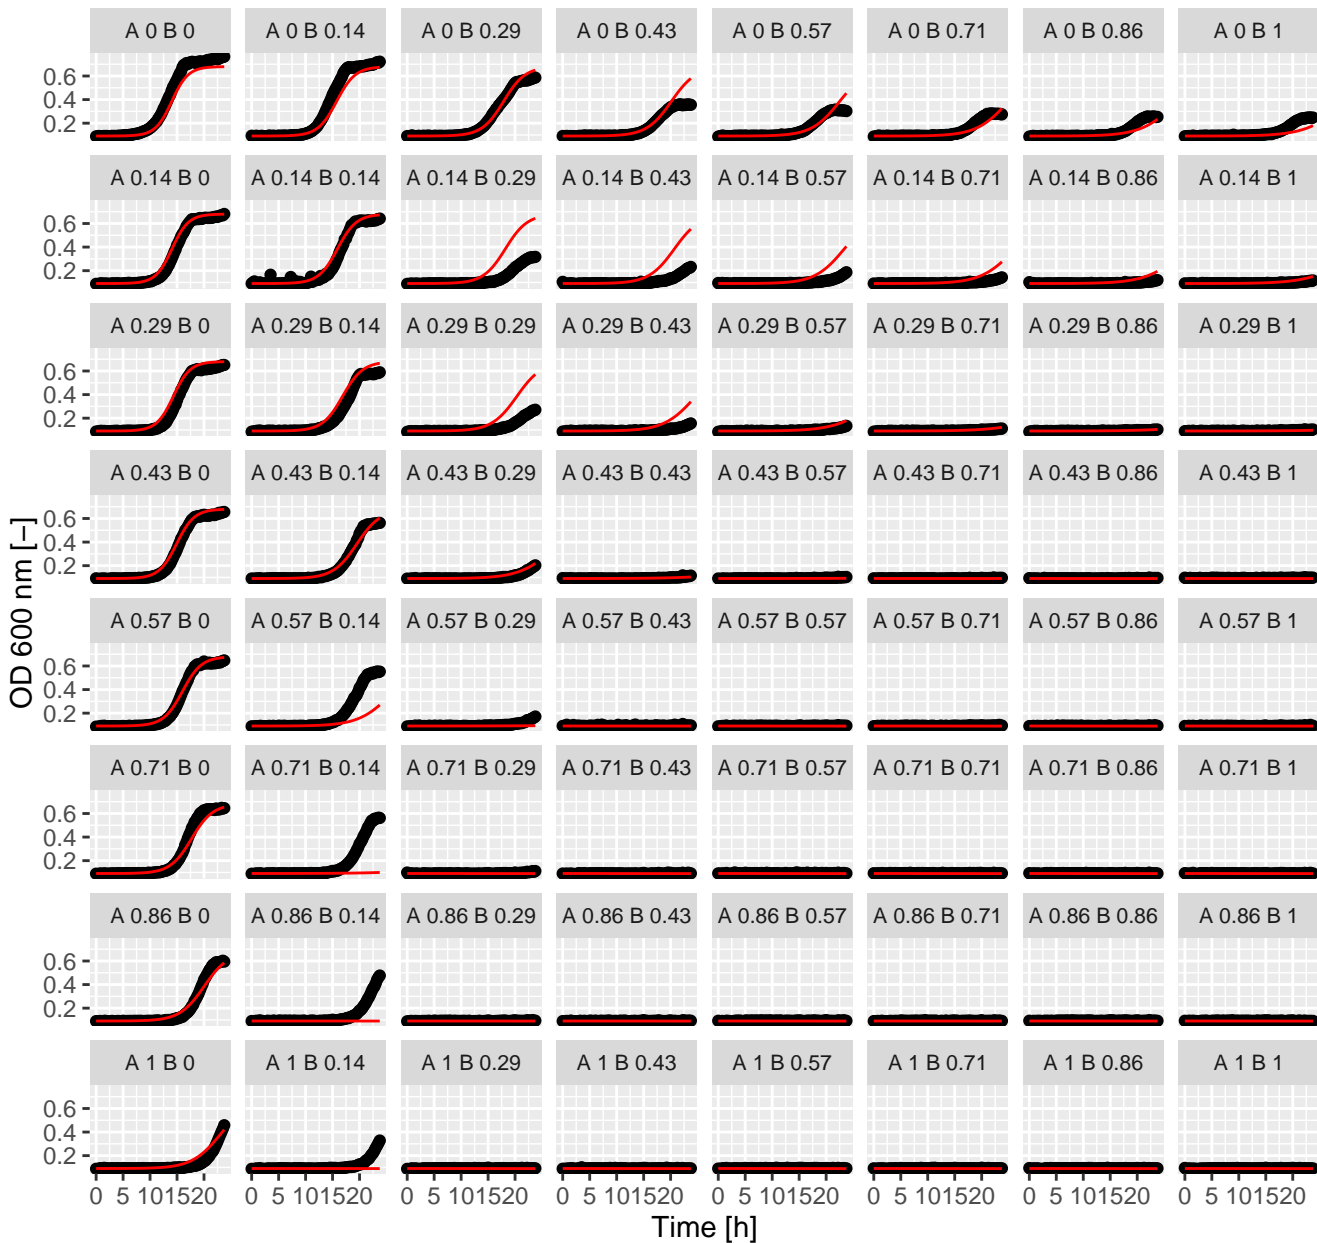

Hal.Tun (= Ax.Bx) Emp. Bliss  
beta = 1.37

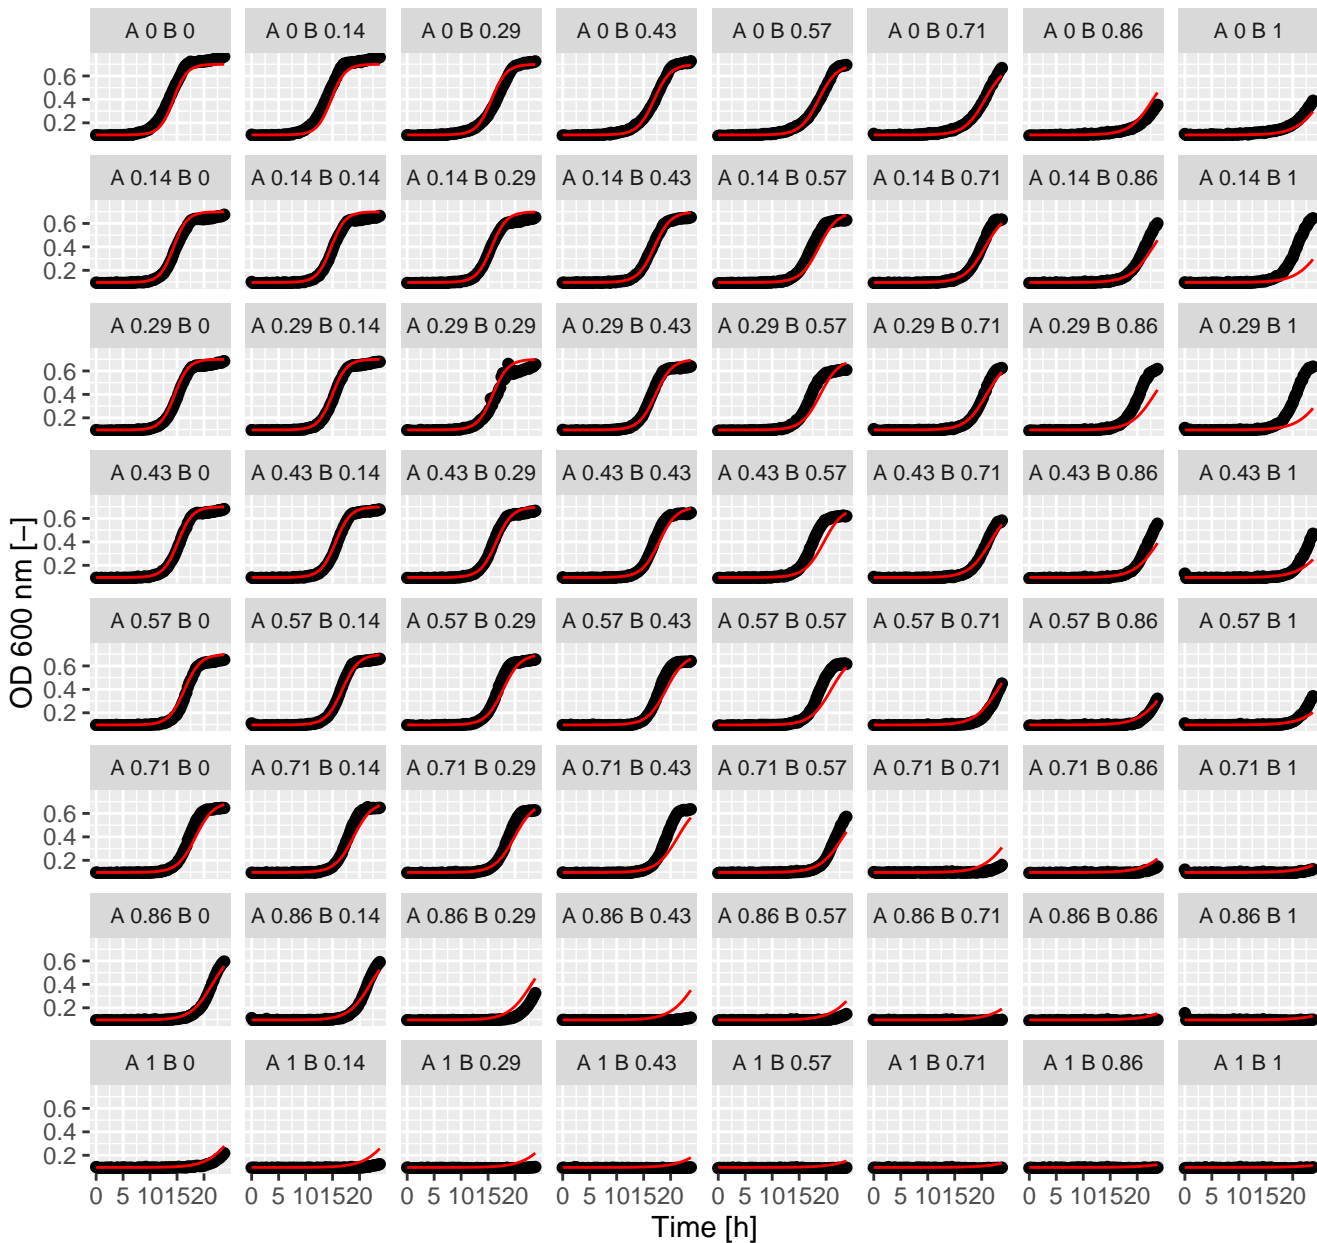



Hyg.Myr (= Ax.Bx) Emp. Bliss  
beta = -29.38

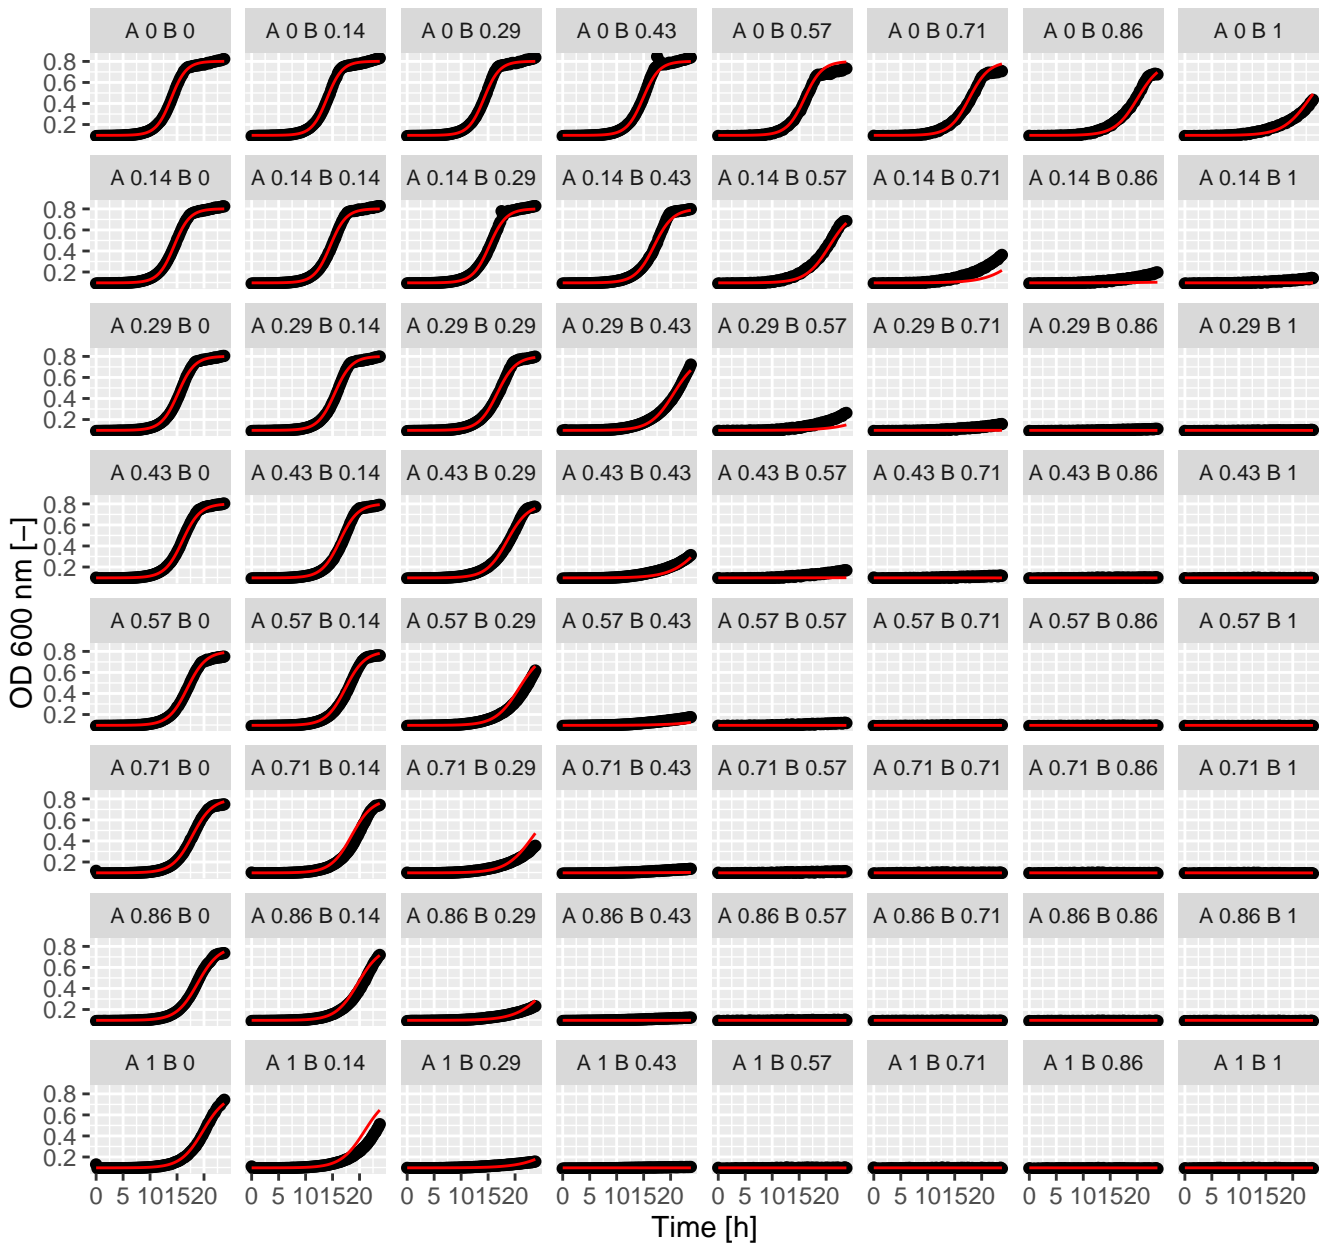

Hyg.Rad (= Ax.Bx) Emp. Bliss  
beta = 0.87

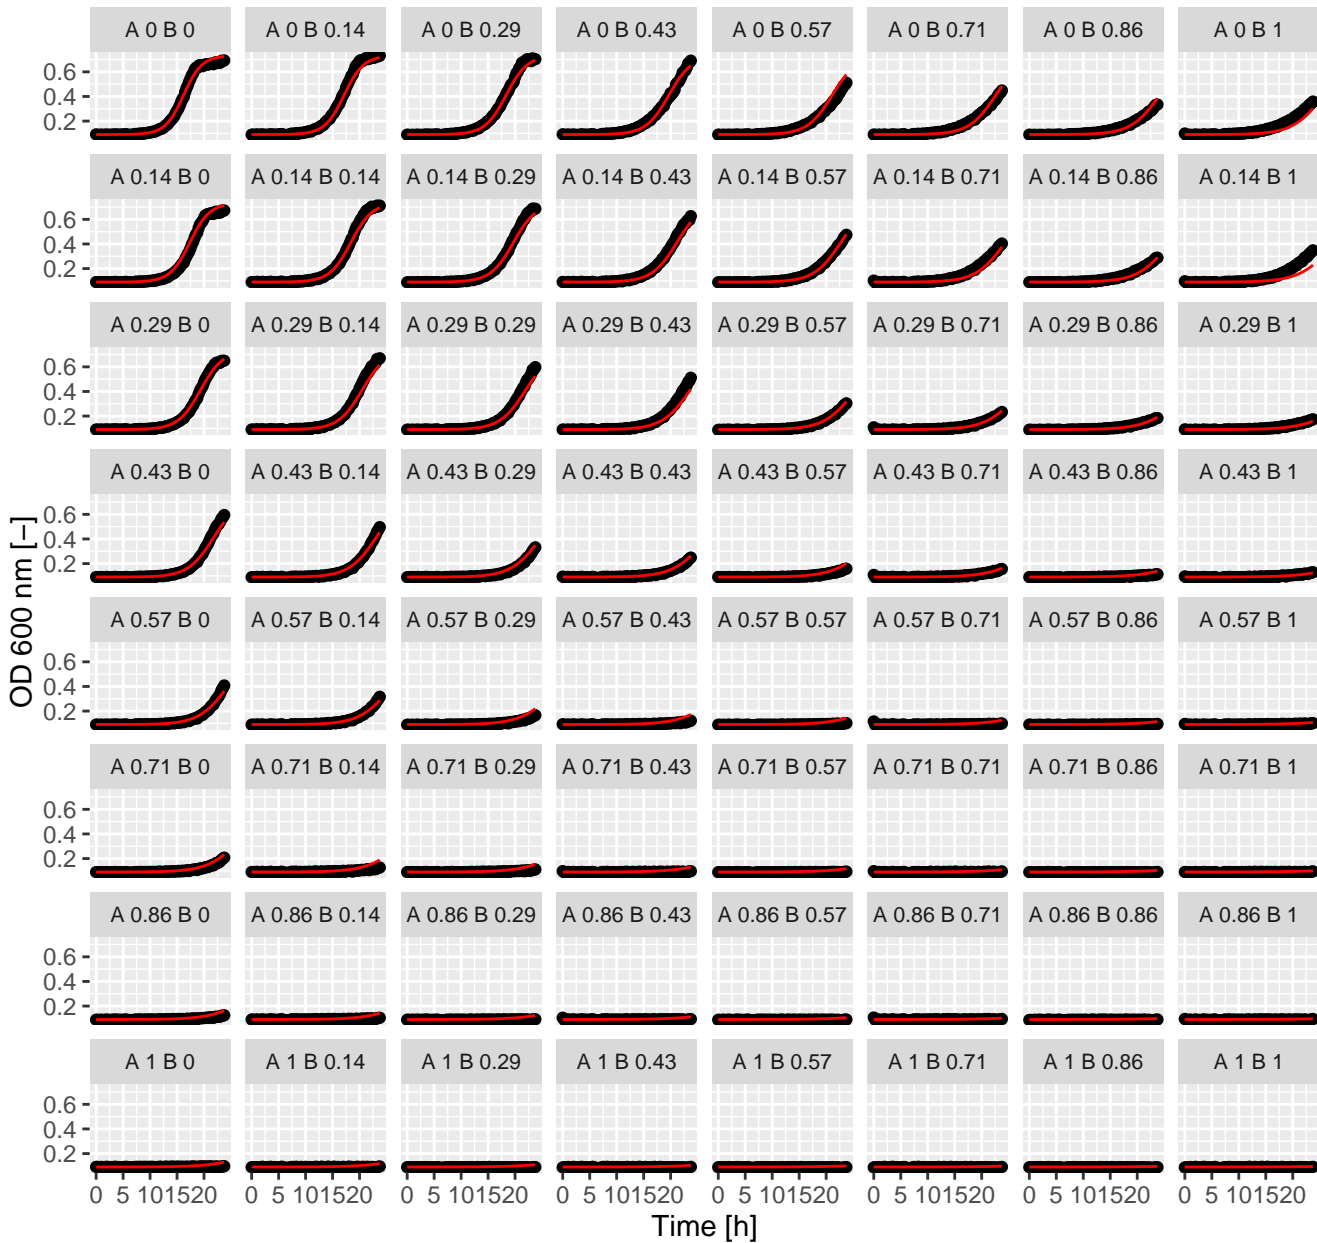



## Hyg.Rap (= Ax.Bx) Emp. Bliss

beta = -9.97

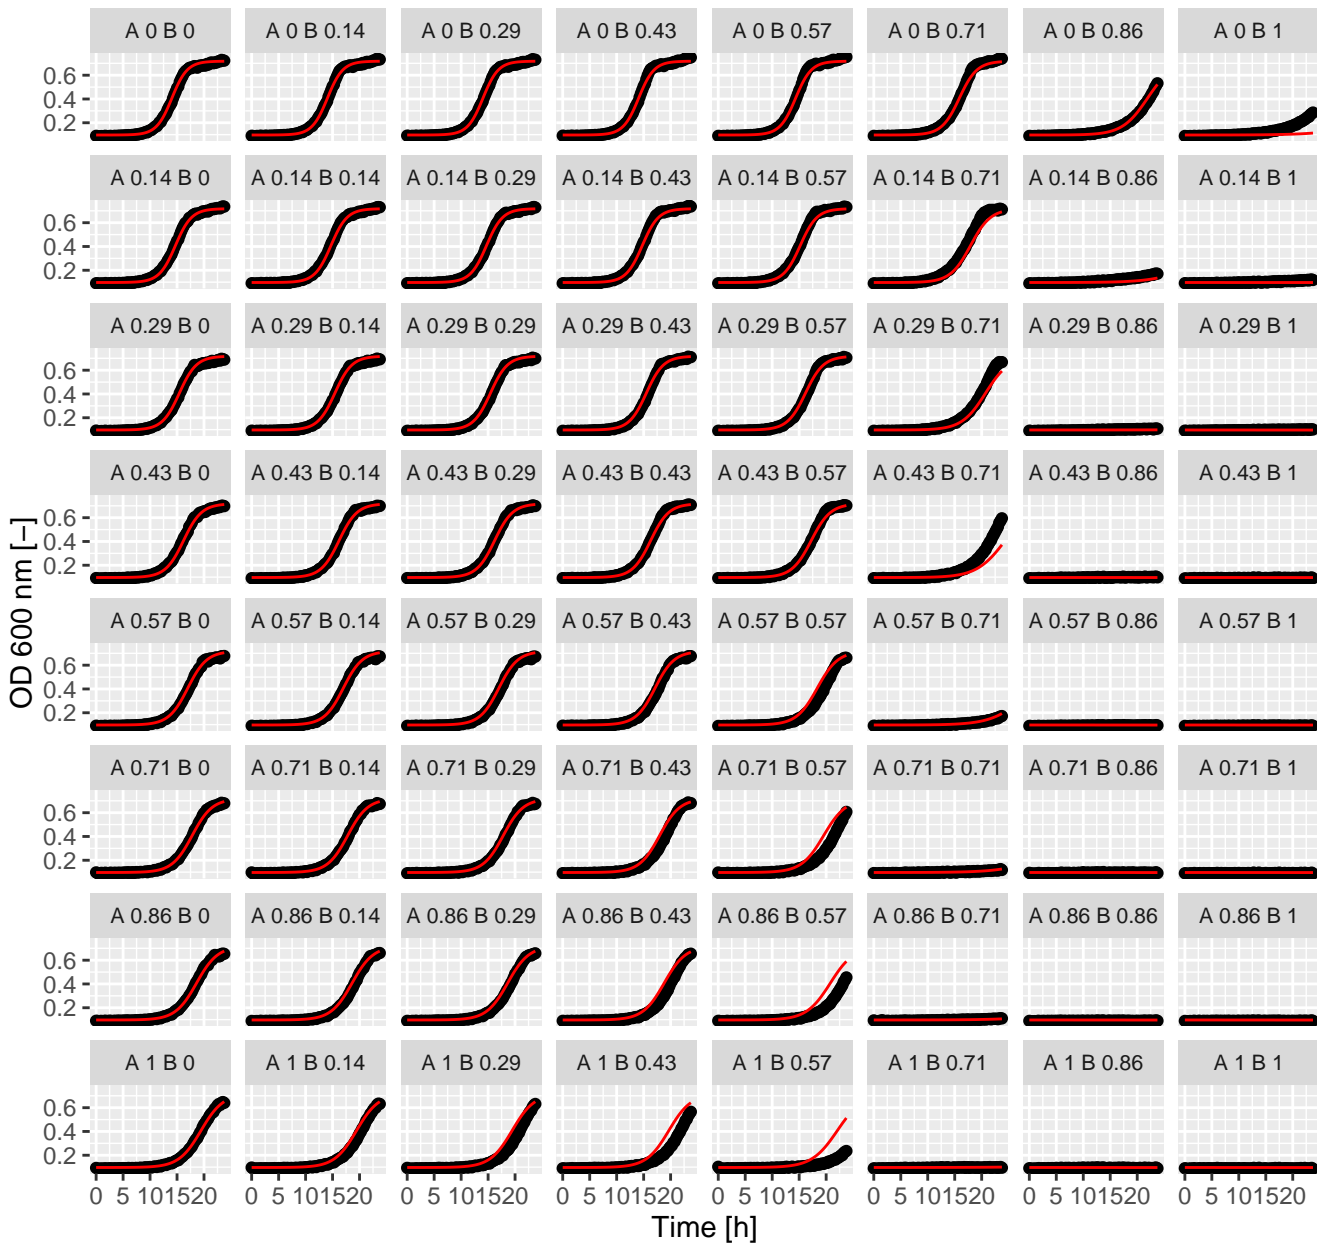

# Hyg.Sta (= Ax.Bx) Emp. Bliss beta = -2.1

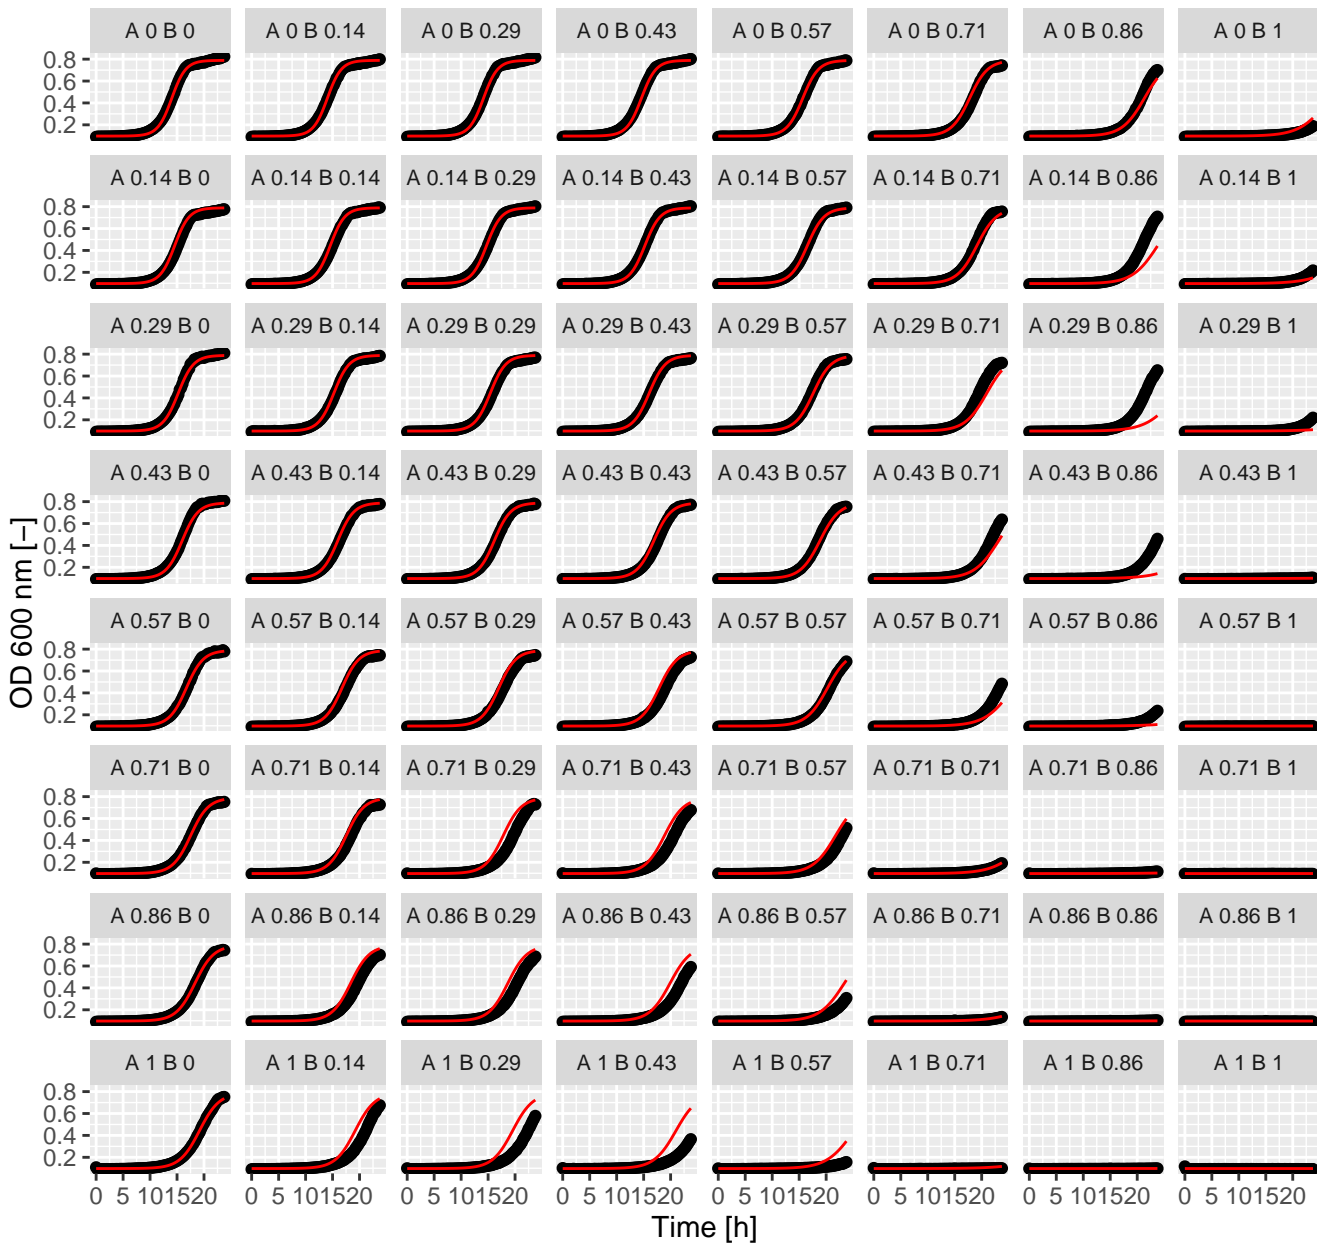

# Lat.Lat (= Ax.Bx) Emp. Bliss

beta = -5696.4

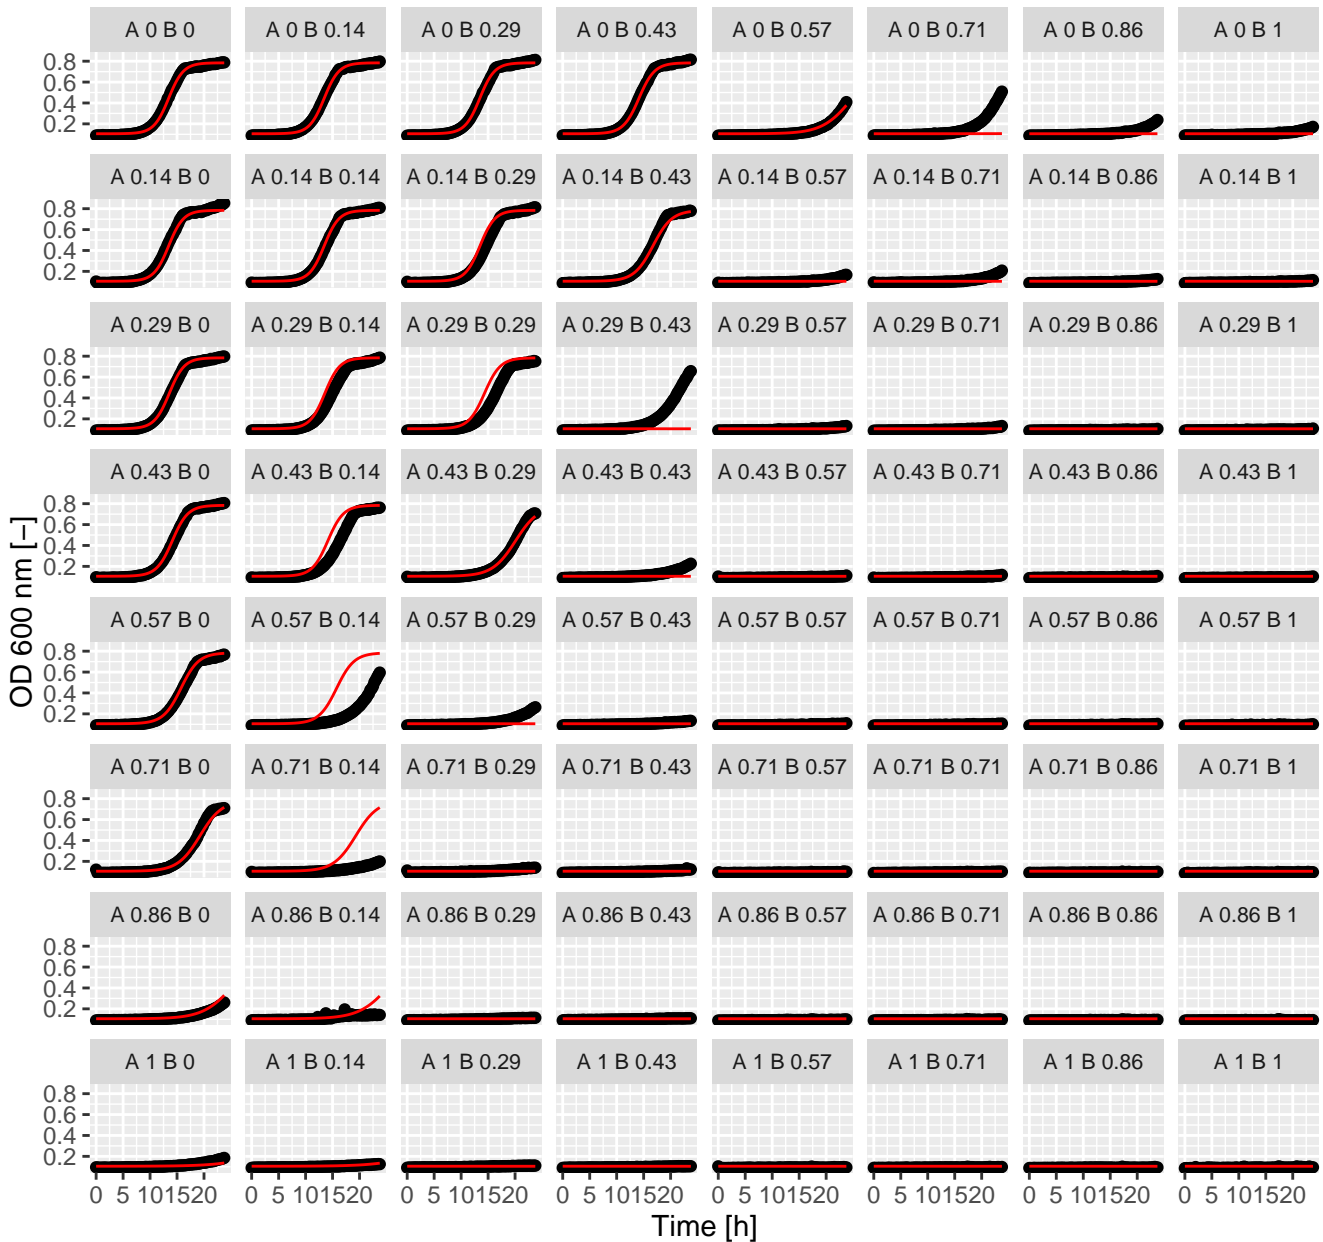

Lat.Met (= Ax.Bx) Emp. Bliss  
beta = 0.18

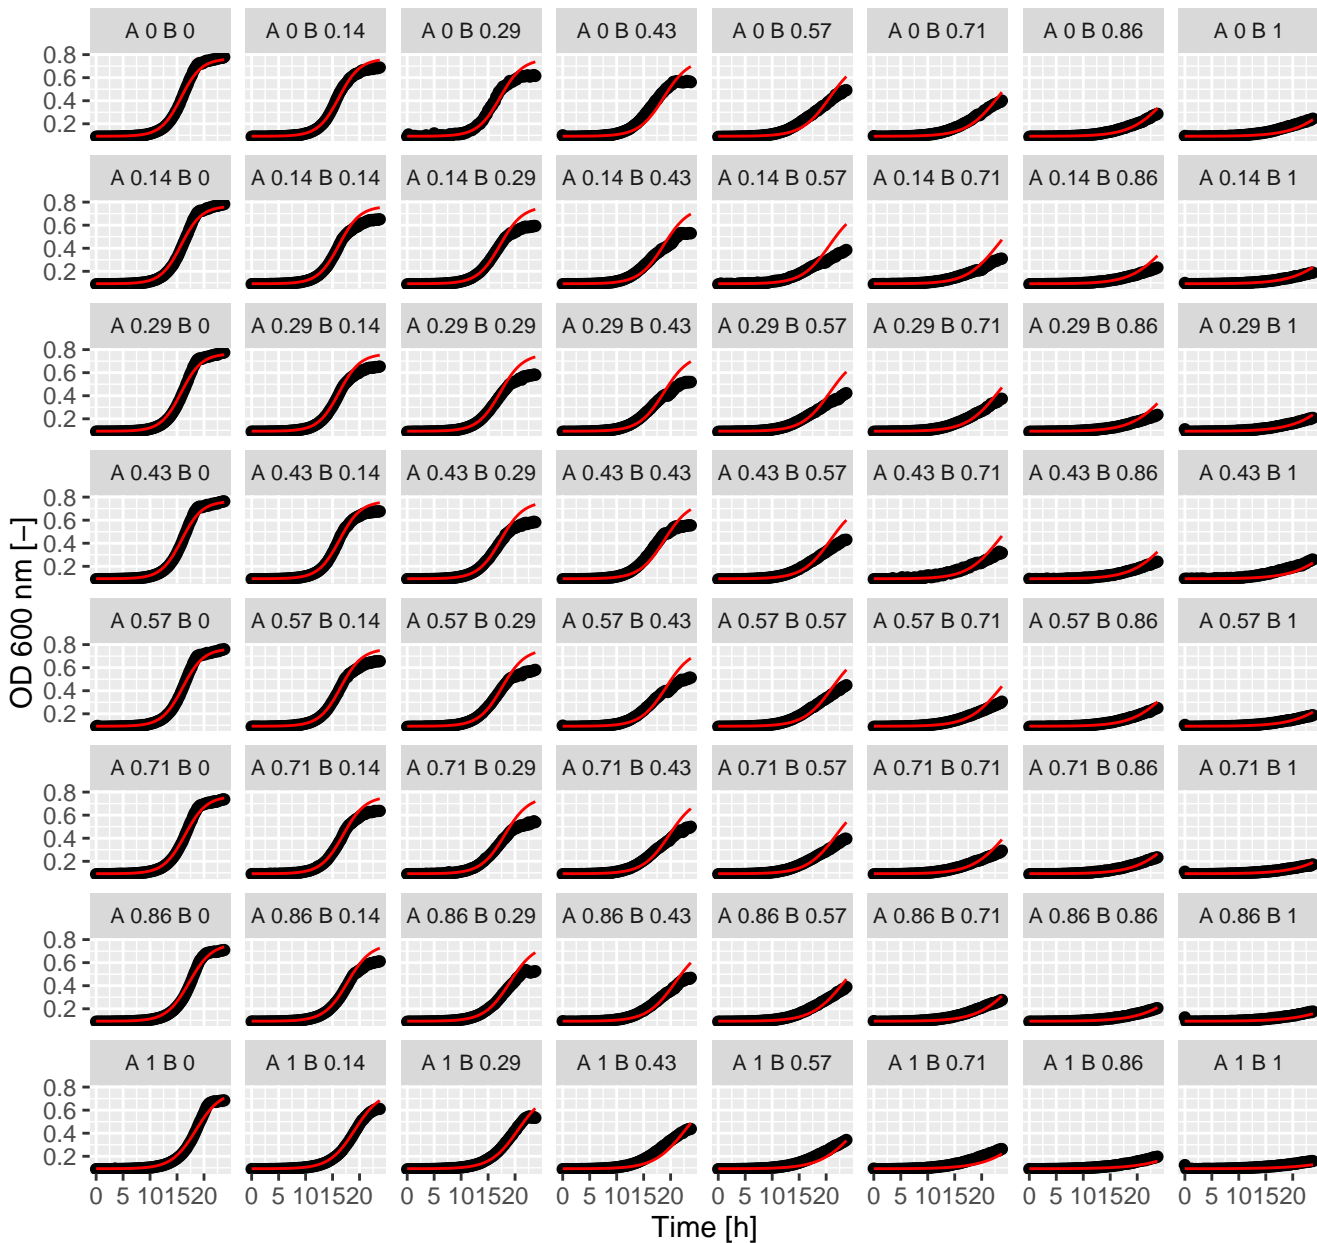

Lat.MMS (= Ax.Bx) Emp. Bliss  
beta = -1.66

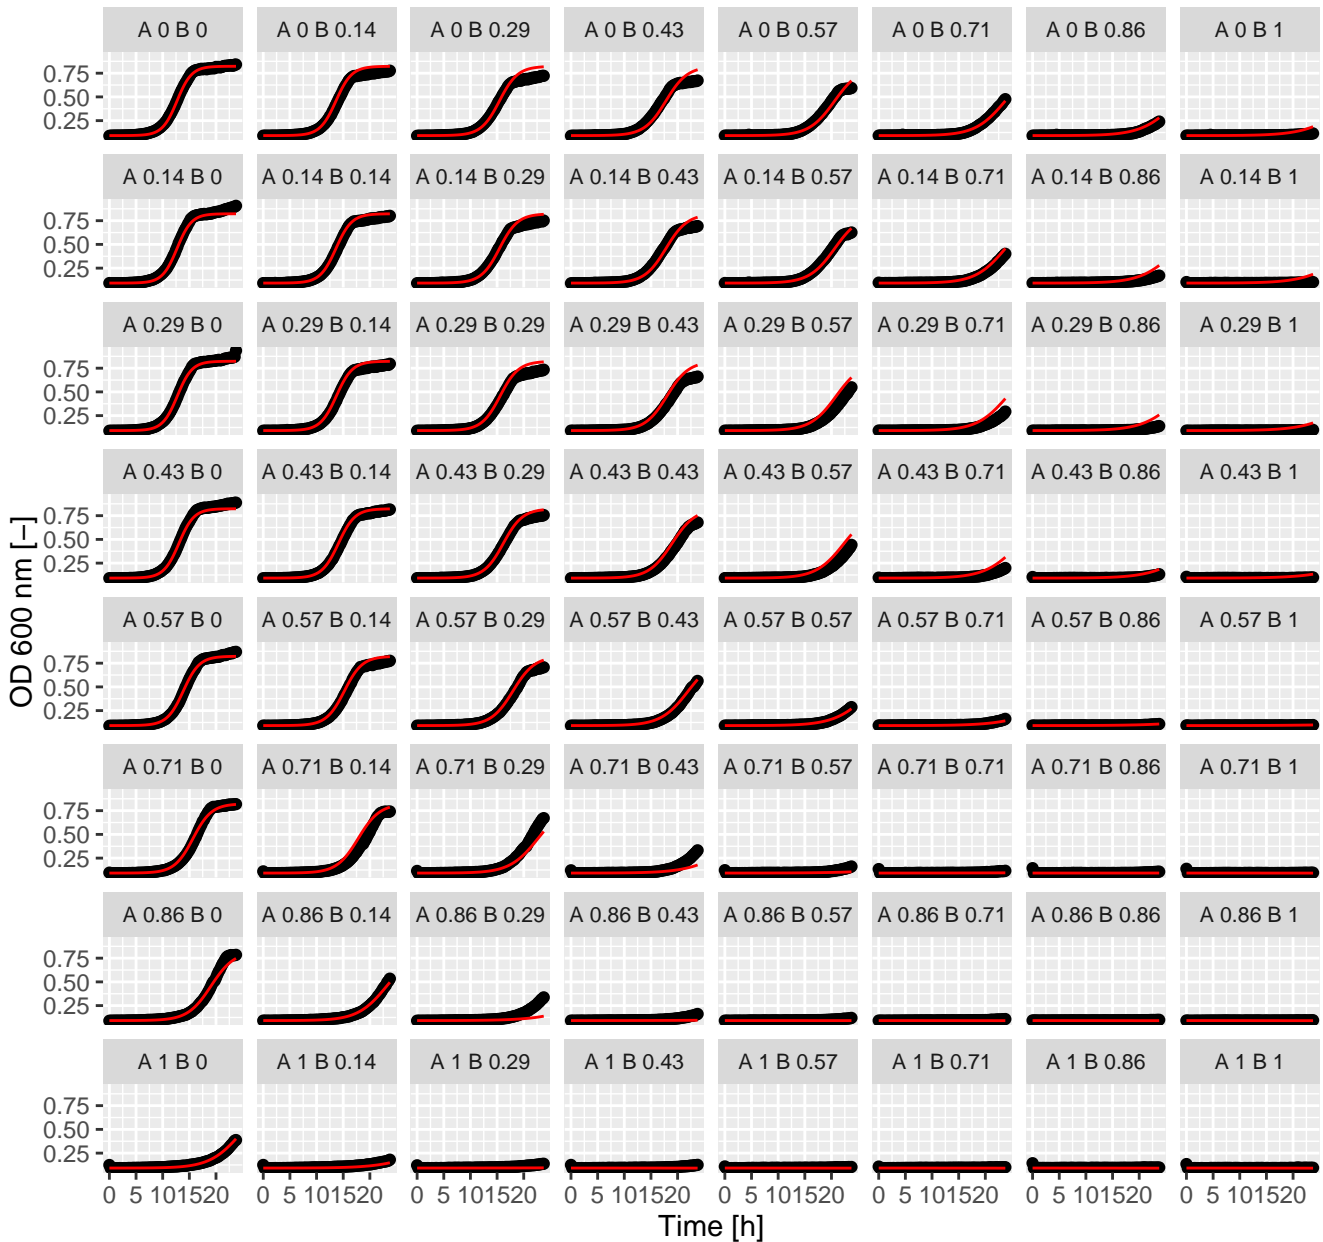

Lat.Myr (= Ax.Bx) Emp. Bliss  
beta = -299.8

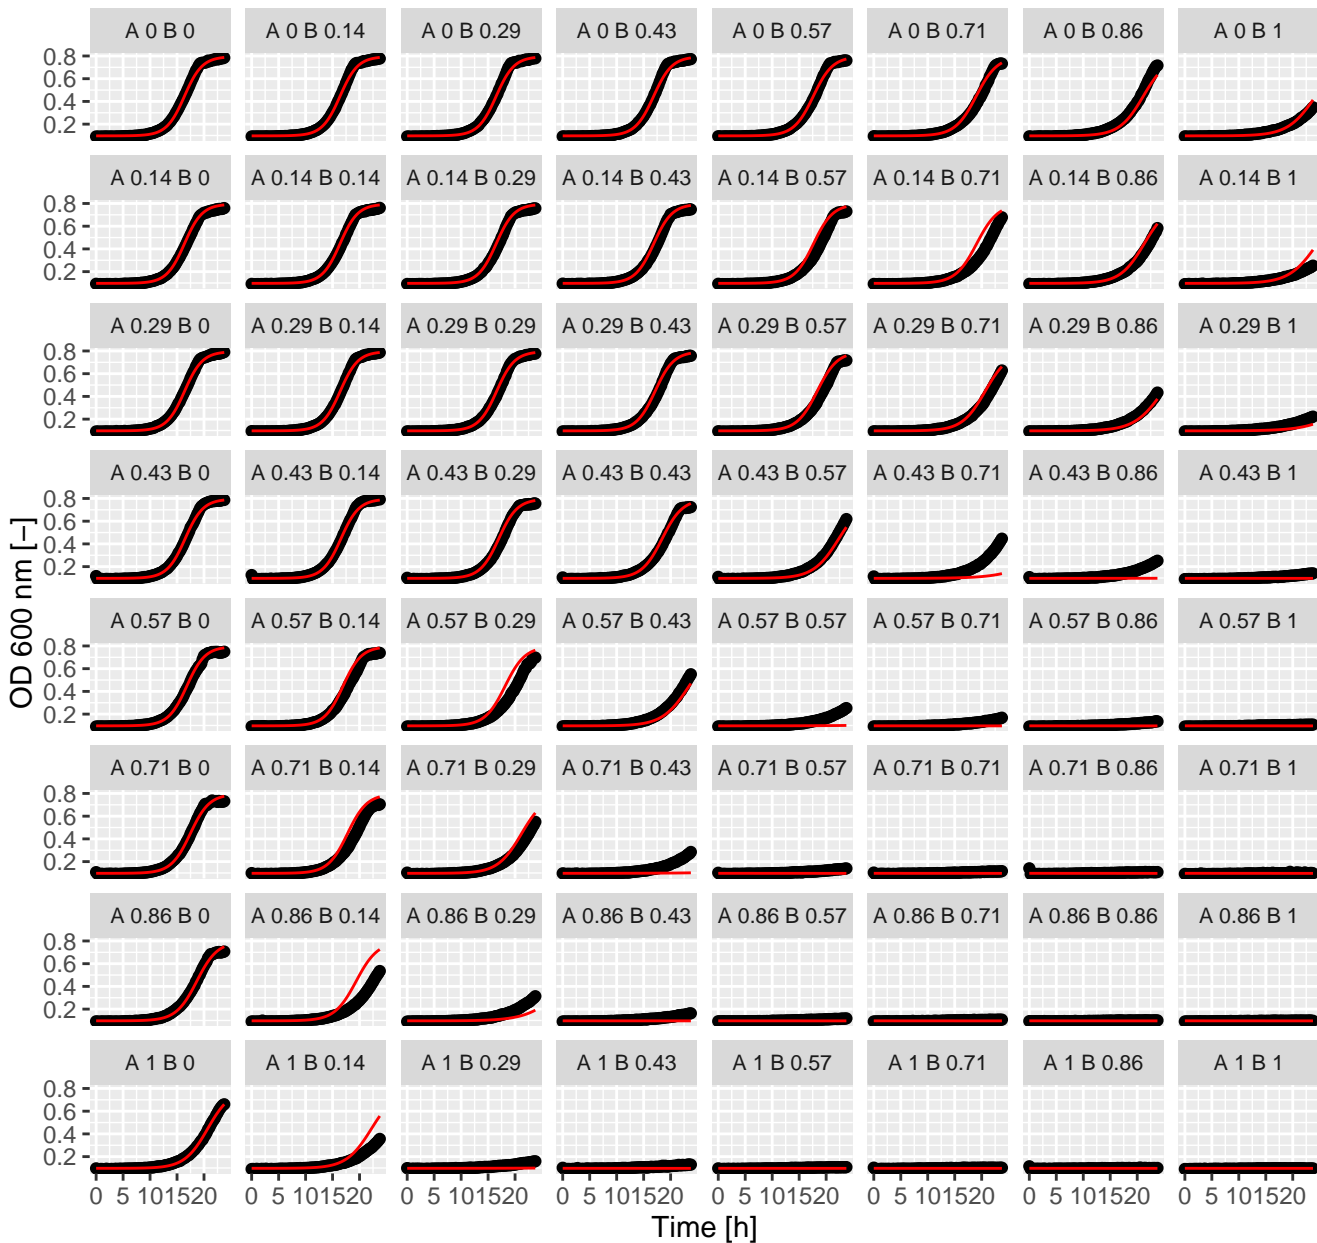

Lat.Pen (= Ax.Bx) Emp. Bliss

beta = -203.12

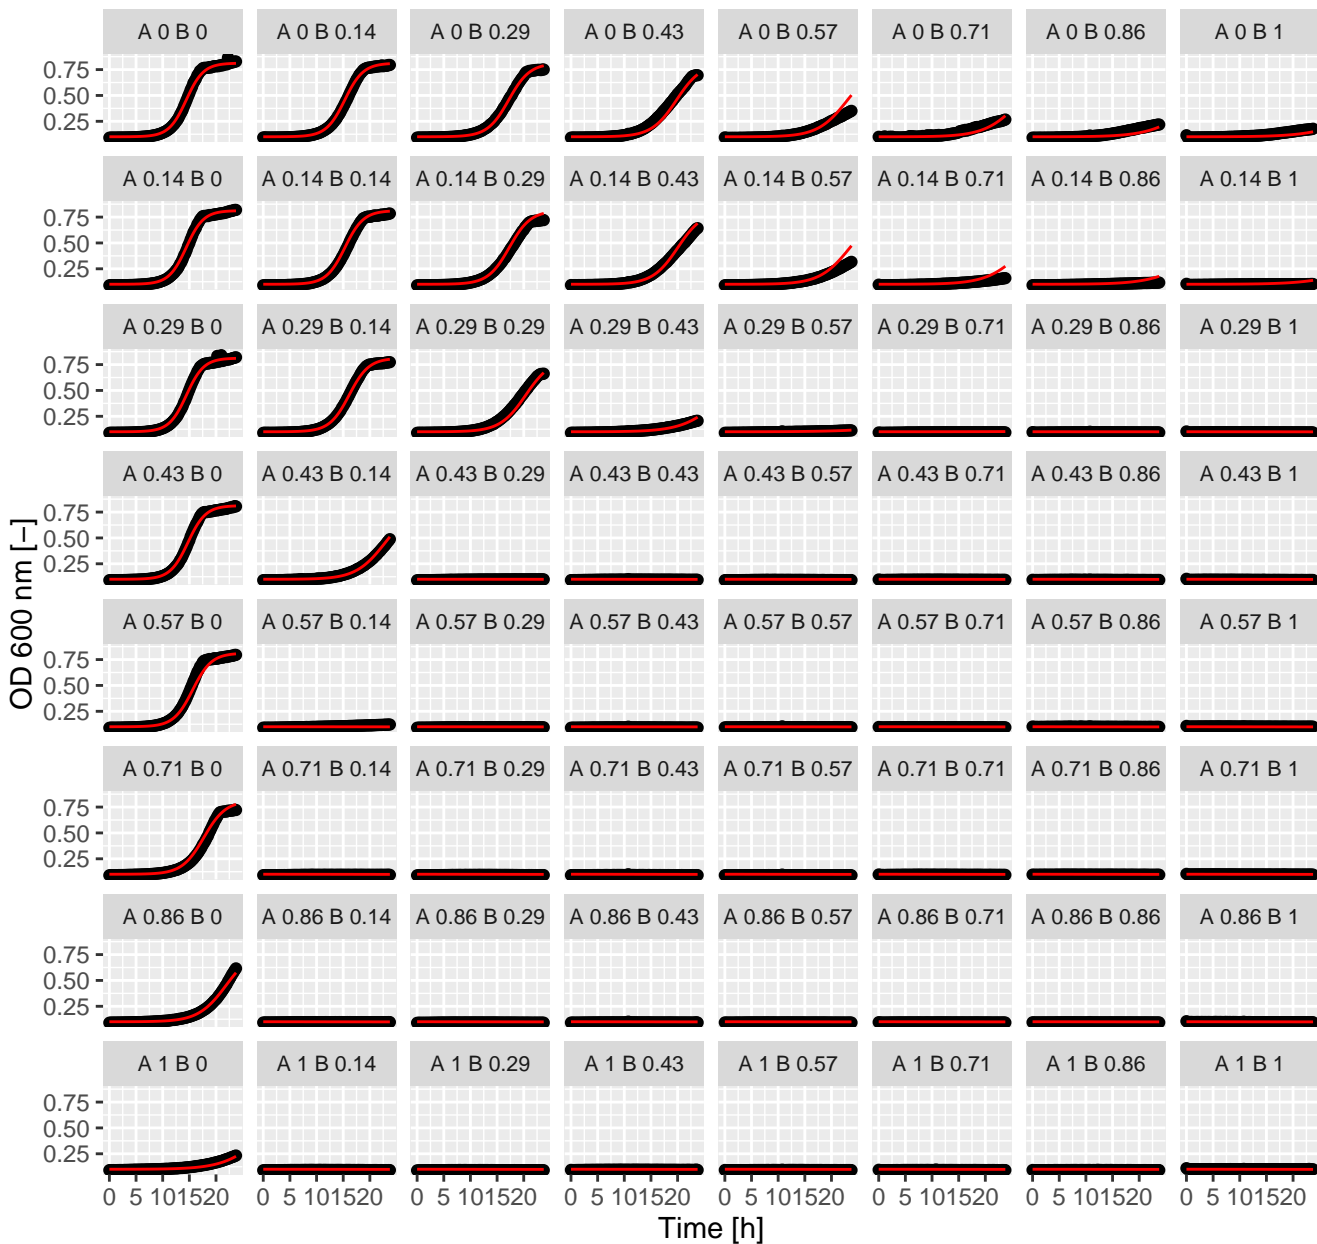

Lat.Qmy (= Ax.Bx) Emp. Bliss  
beta = 1.66

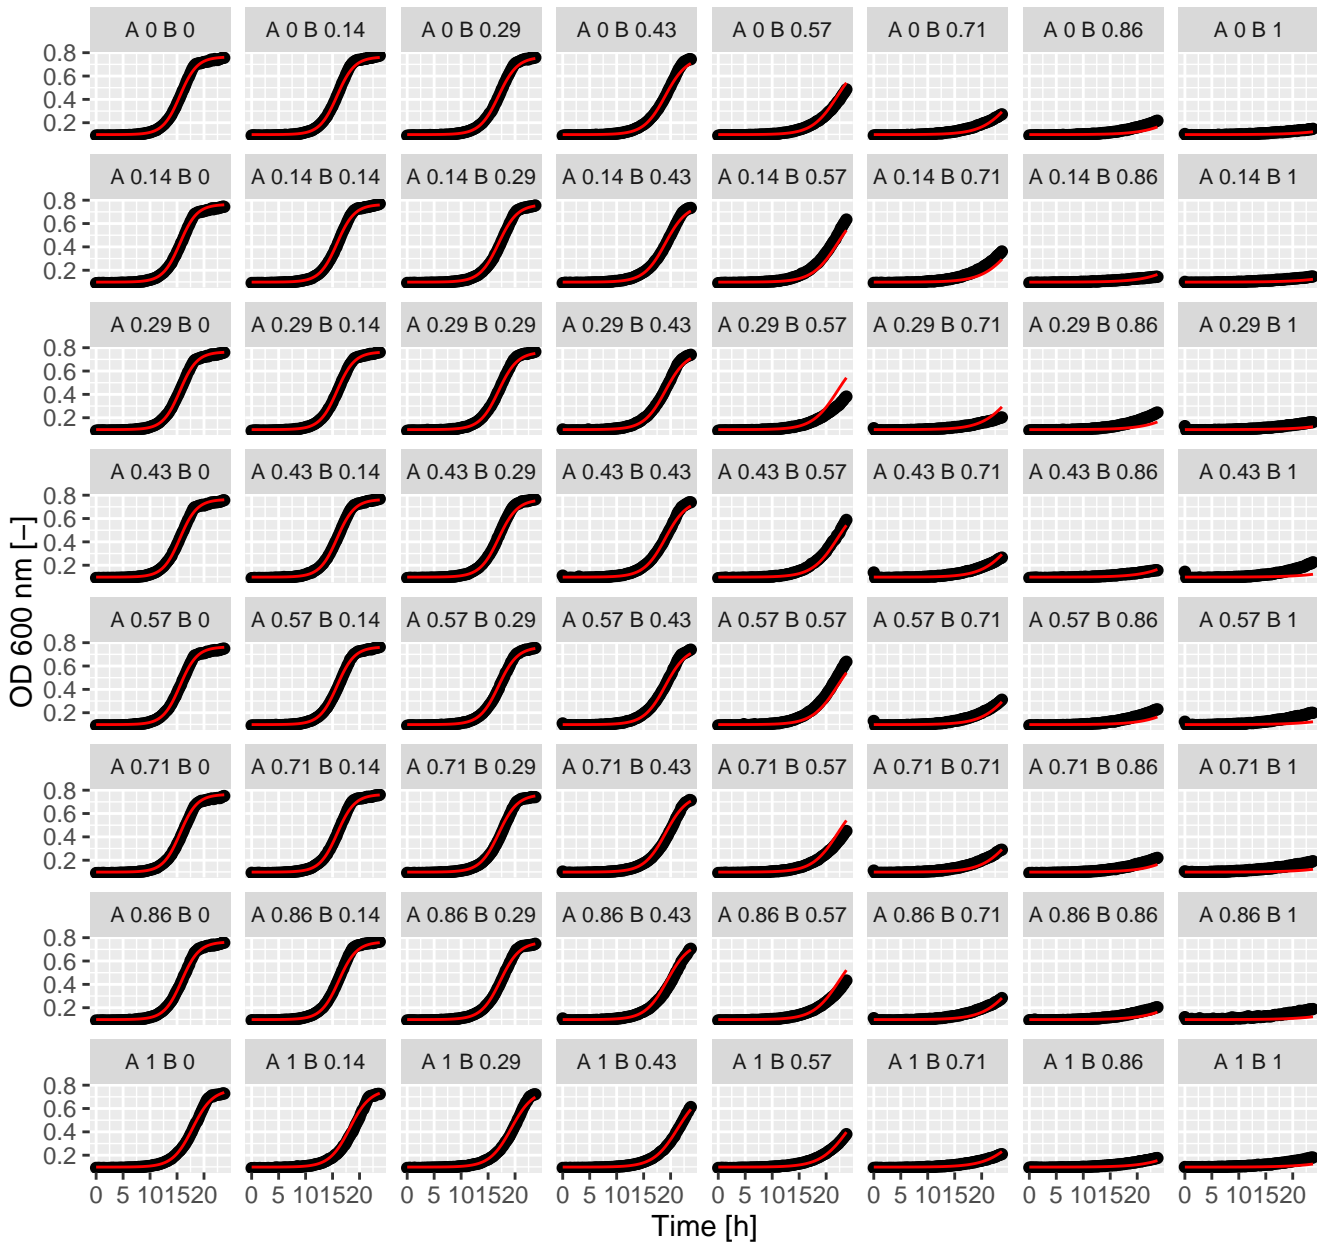



Lat.Rad (= Ax.Bx) Emp. Bliss  
beta = 2.49

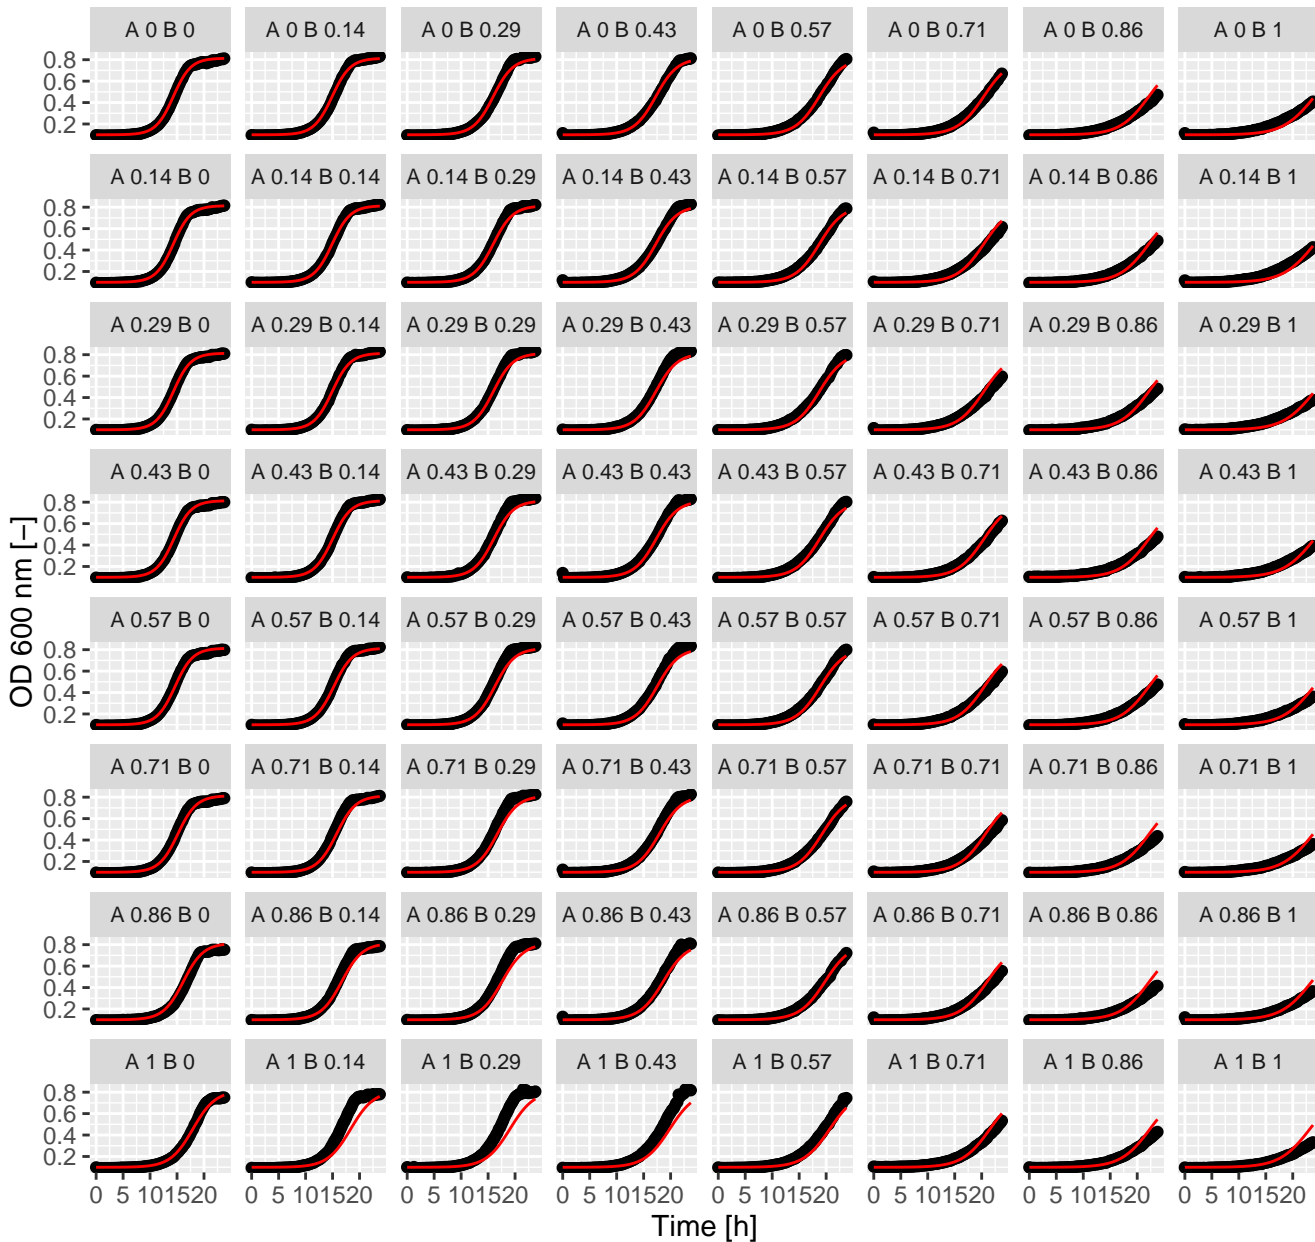

Lat.Rap (= Ax.Bx) Emp. Bliss  
beta = -22.66

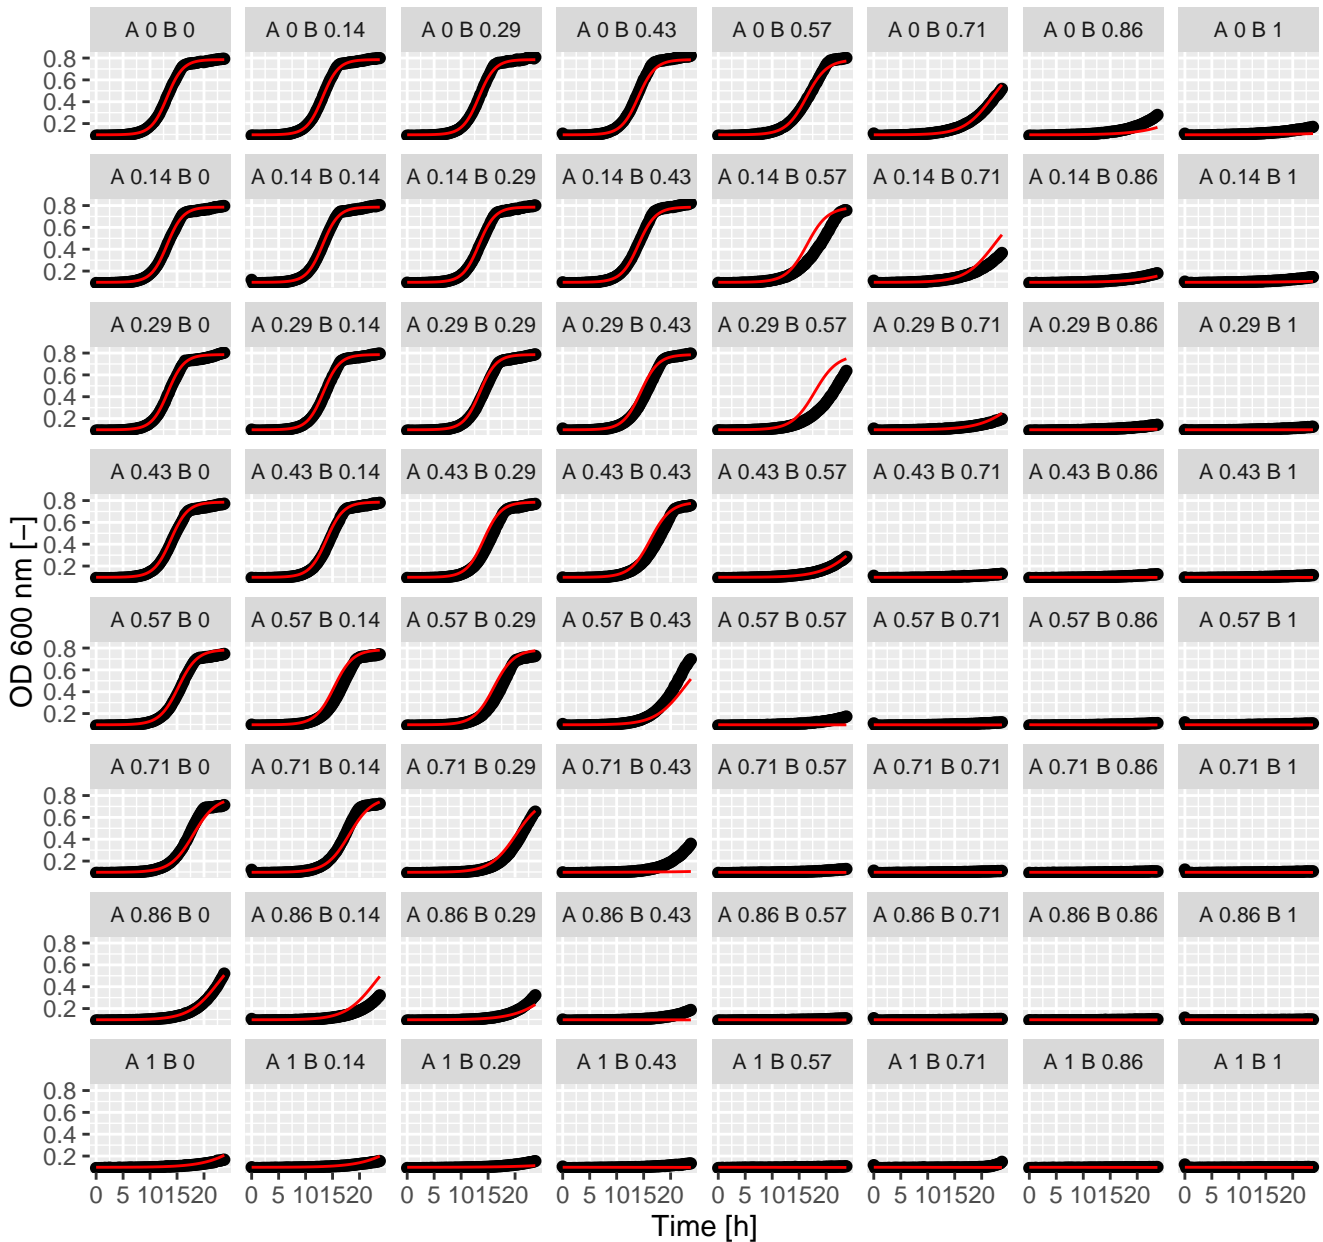

Lat.Sta (= Ax.Bx) Emp. Bliss  
beta = -0.36

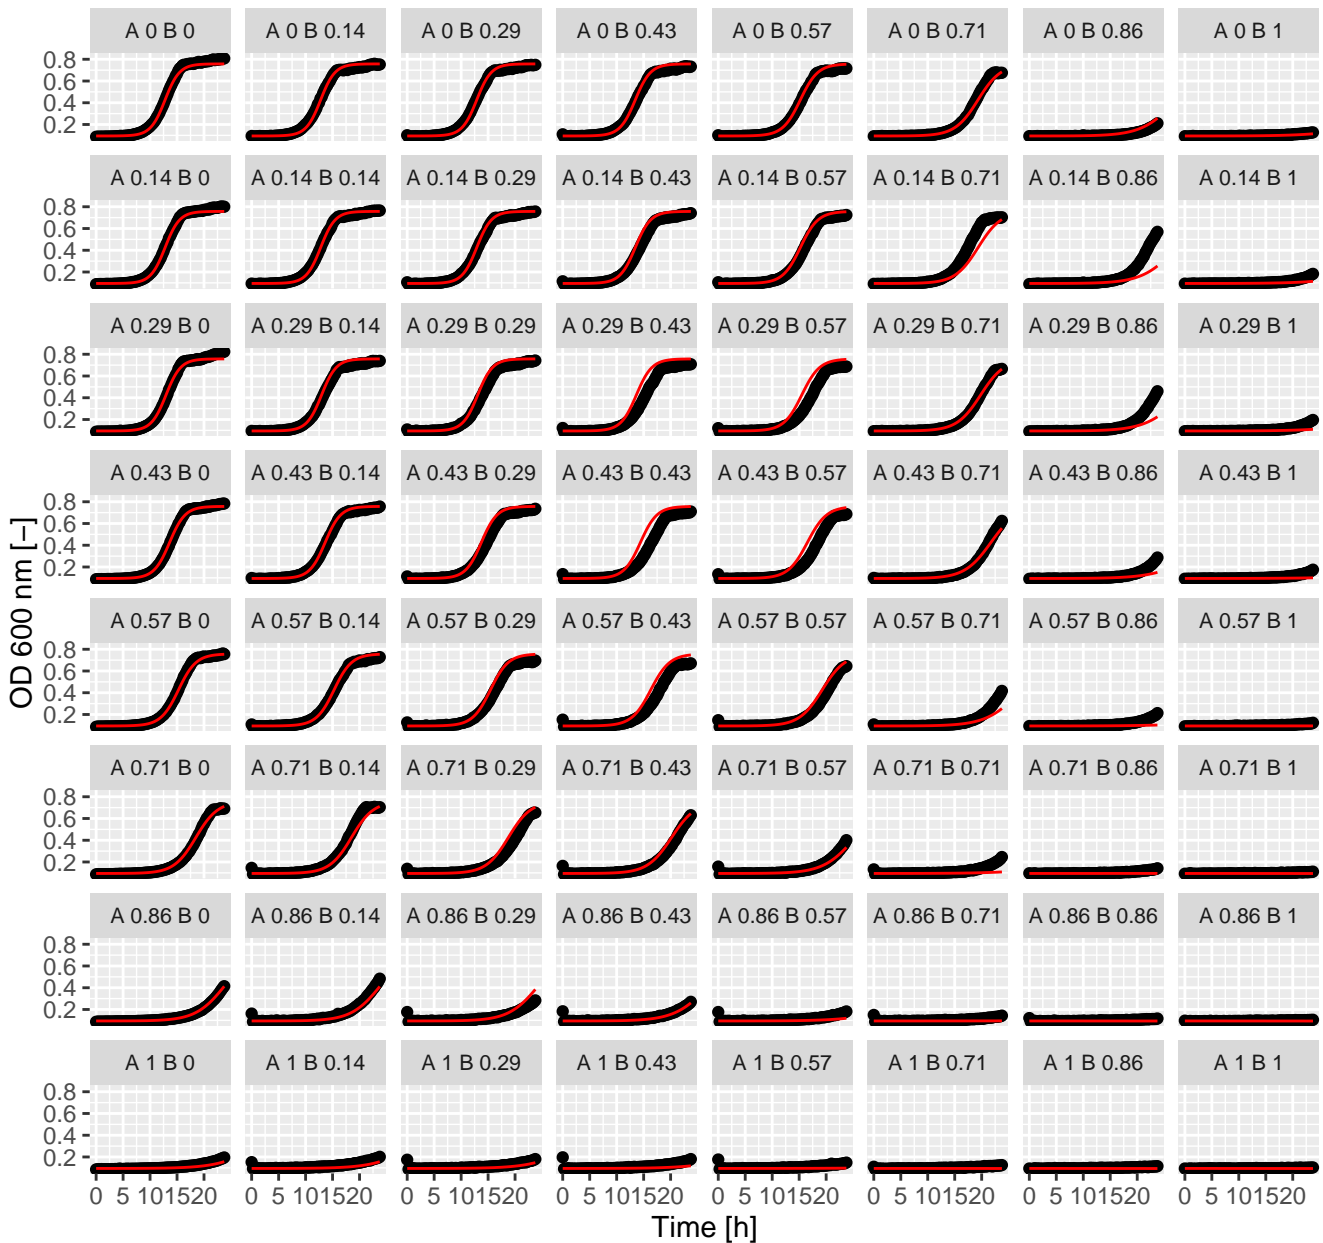

Lat.Tac (= Ax.Bx) Emp. Bliss  
beta = -49152.4

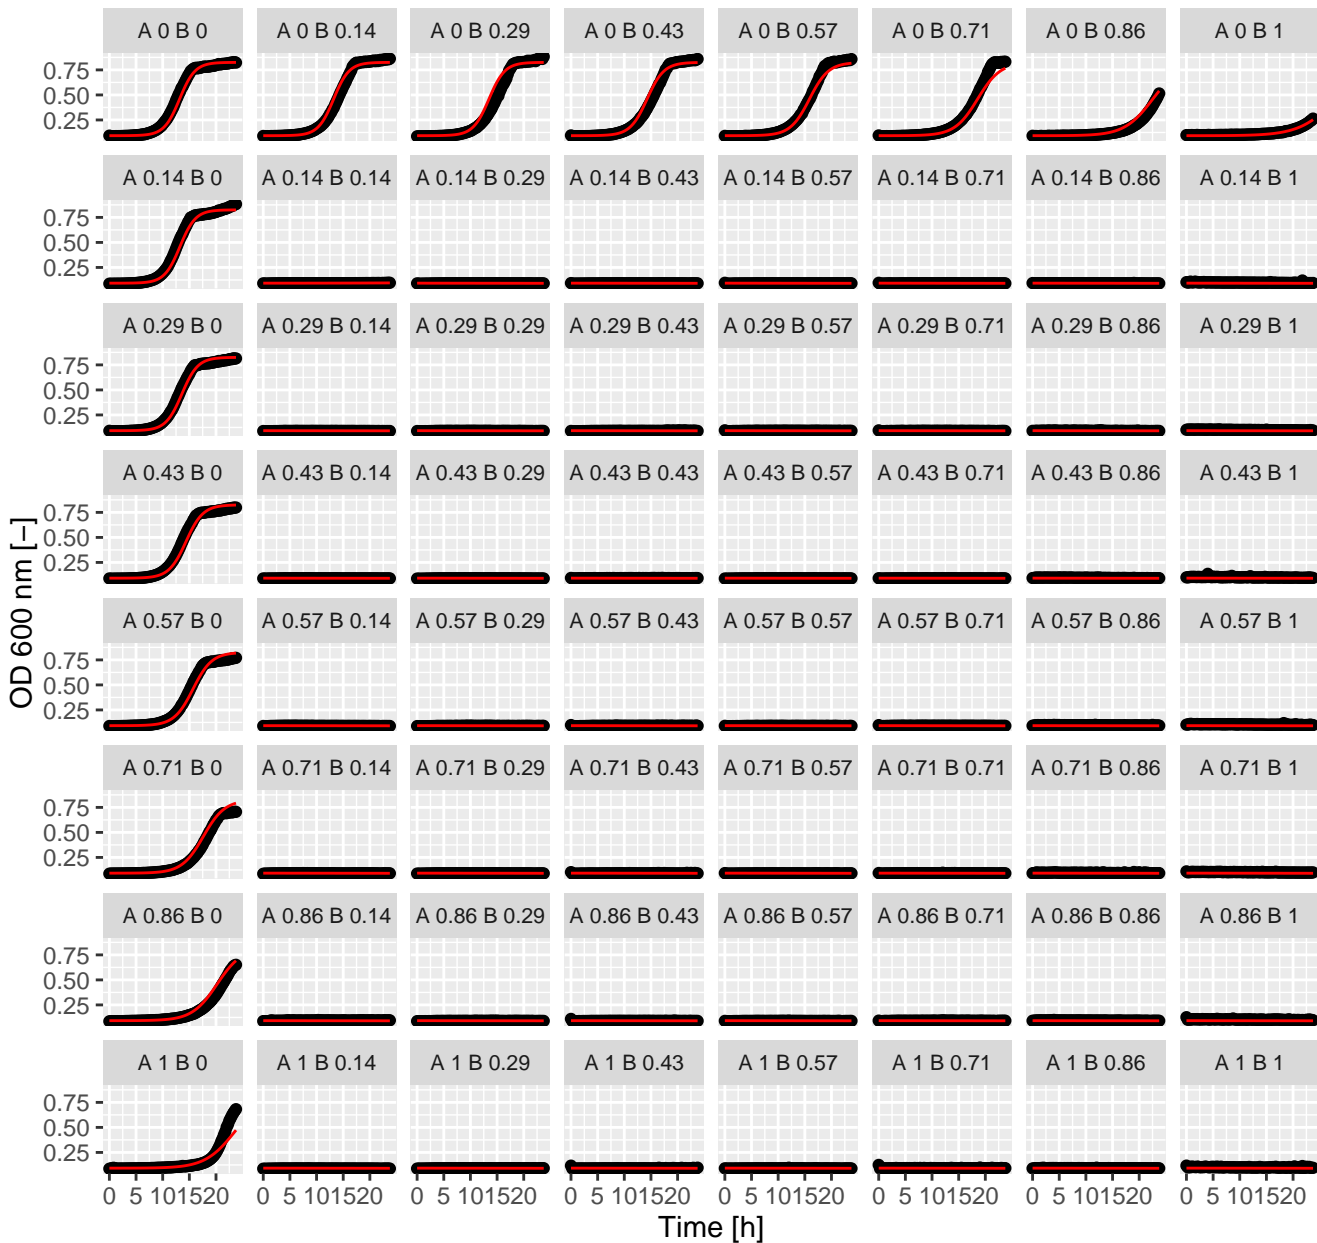

Lat.Tam (= Ax.Bx) Emp. Bliss  
beta = -5.04

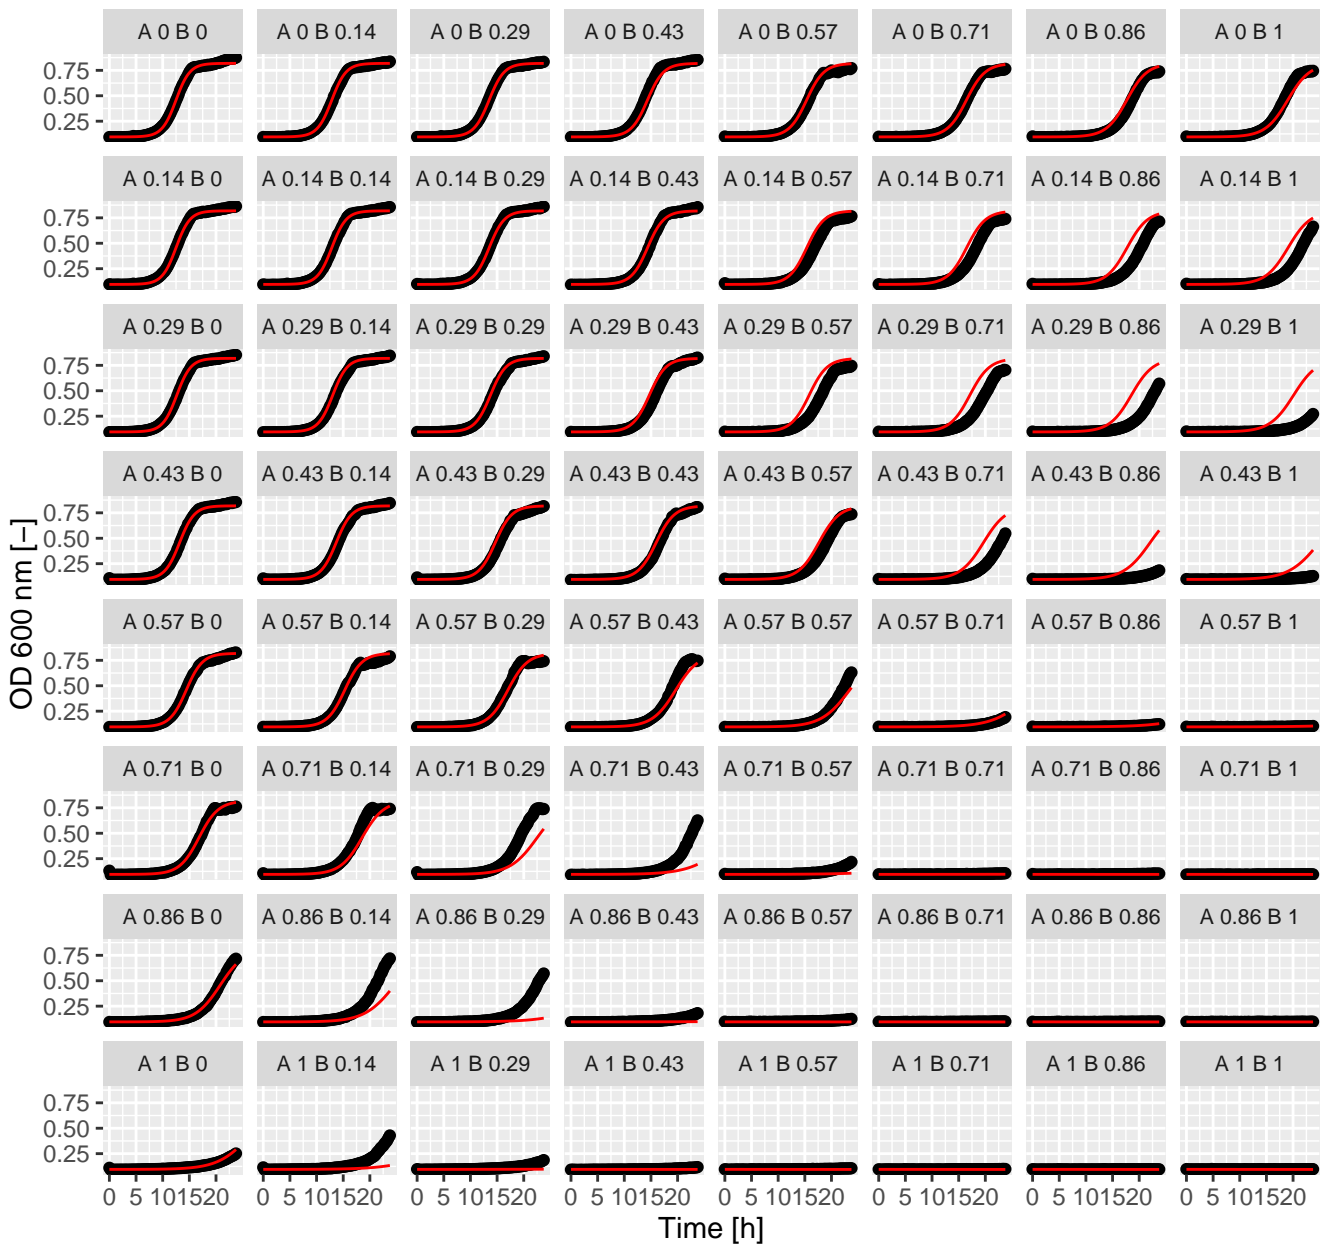

Lat.Ter (= Ax.Bx) Emp. Bliss  
beta = -646.6

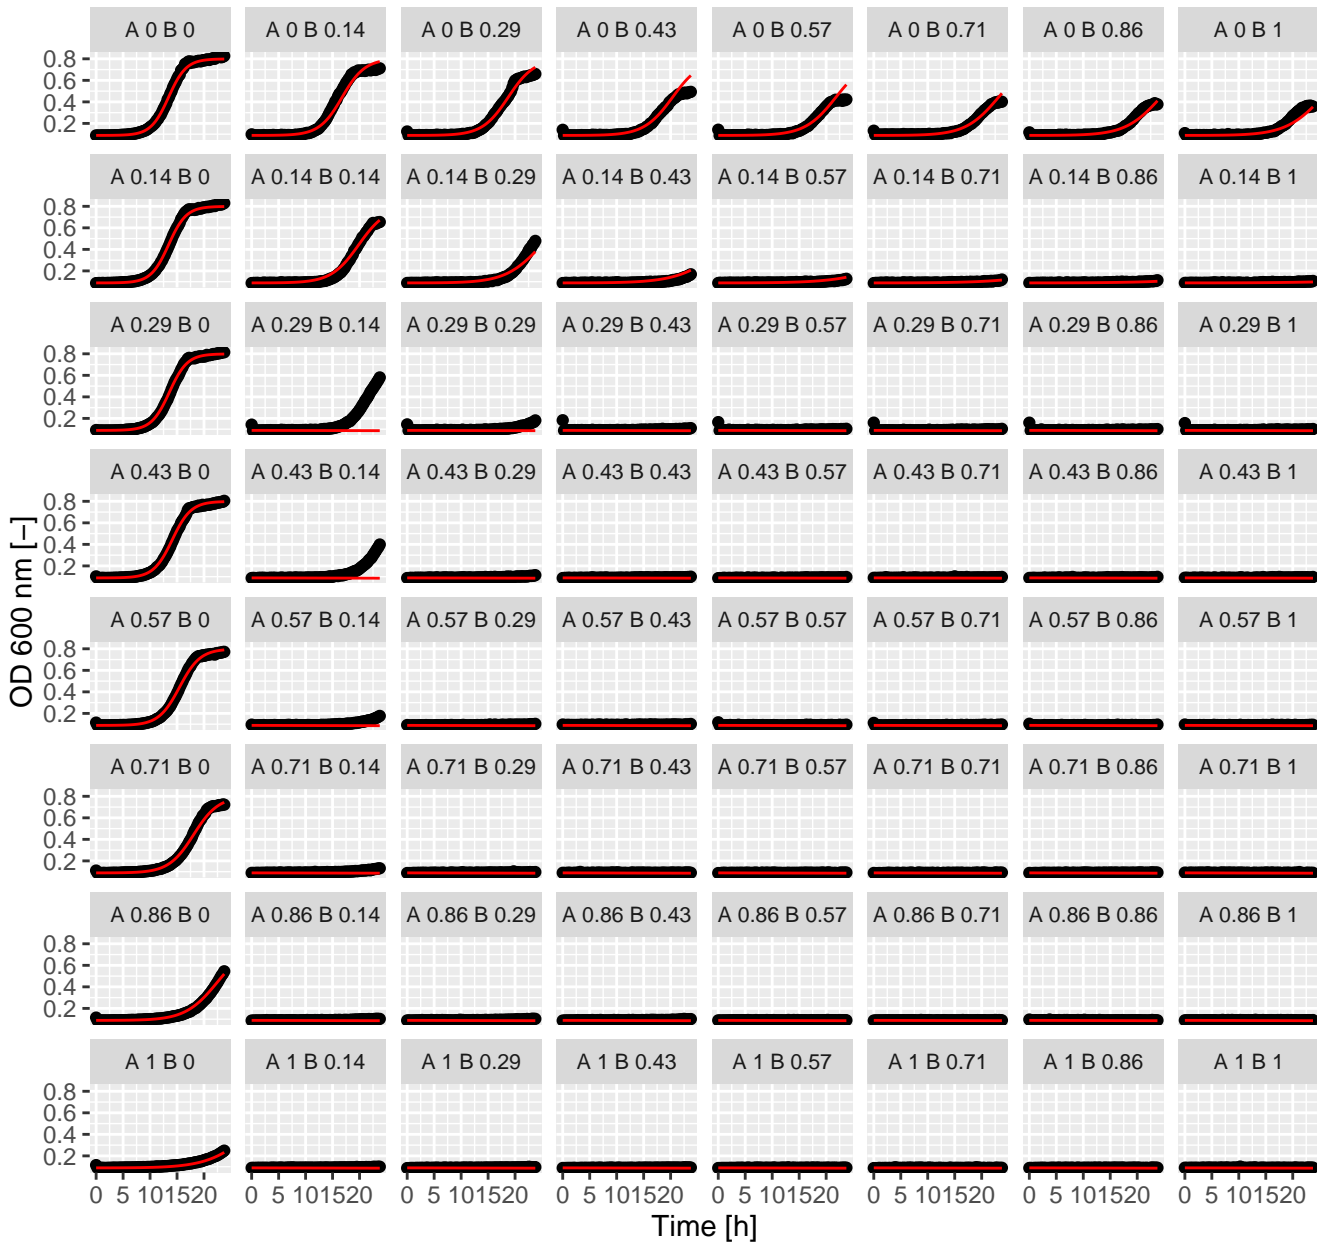

Lat.Tun (= Ax.Bx) Emp. Bliss  
beta = -3.49

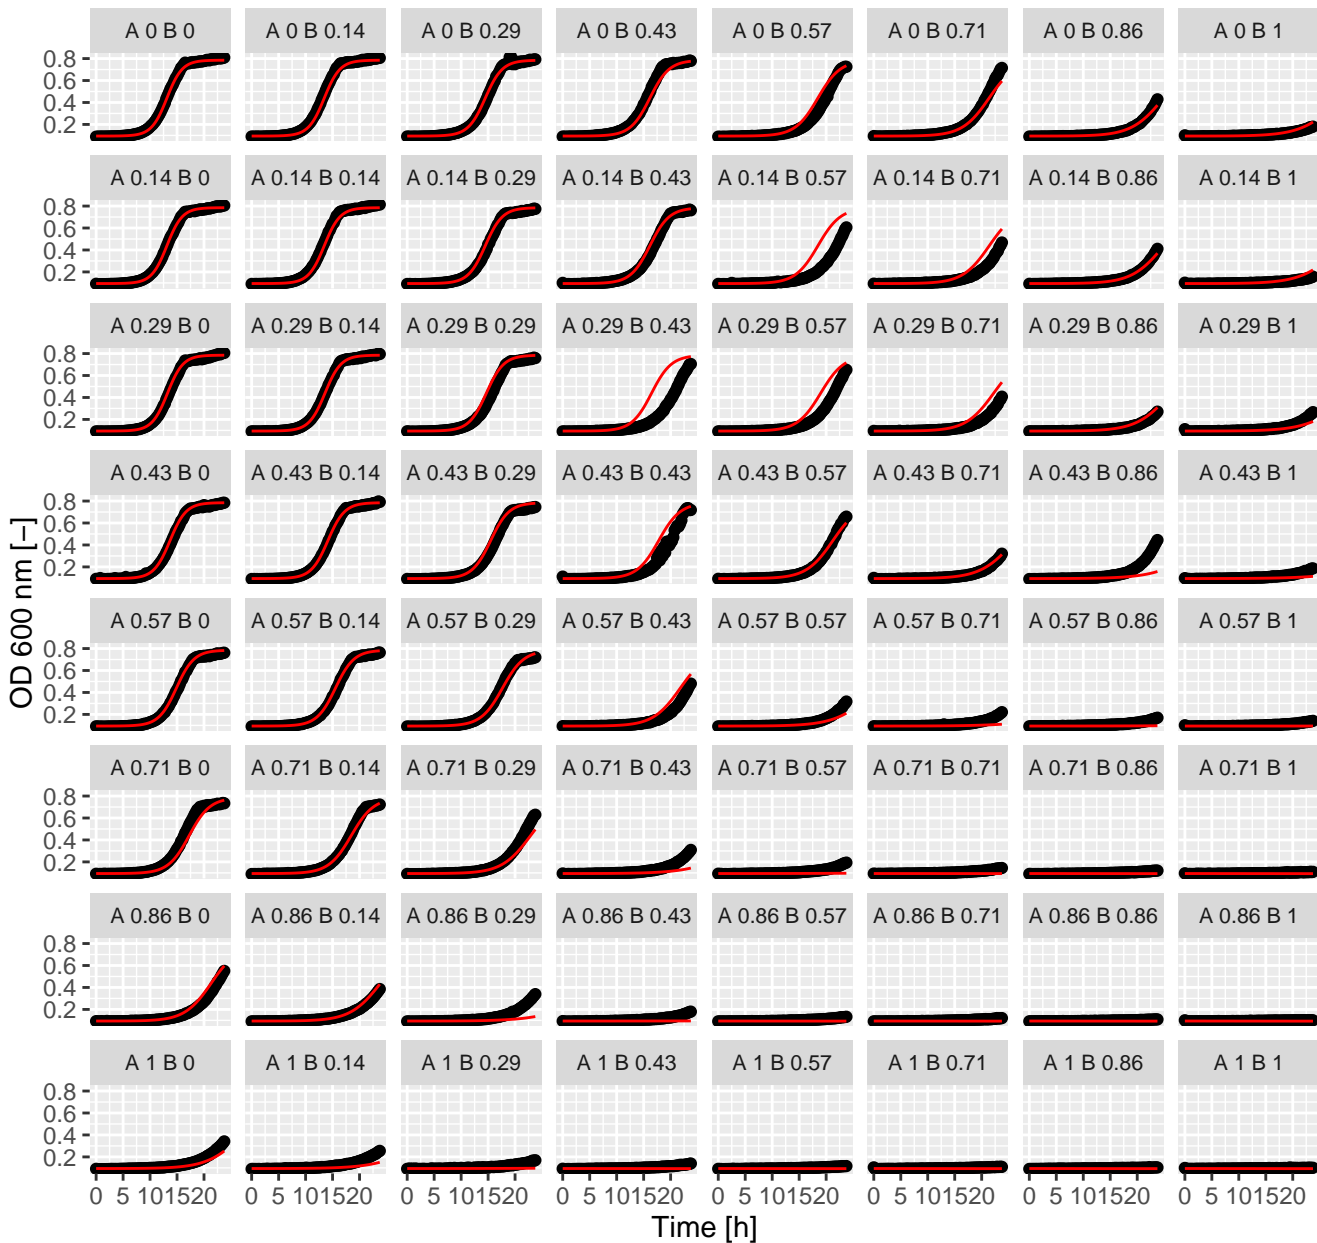

Lit.Rad (= Ax.Bx) Emp. Bliss  
beta = -0.88

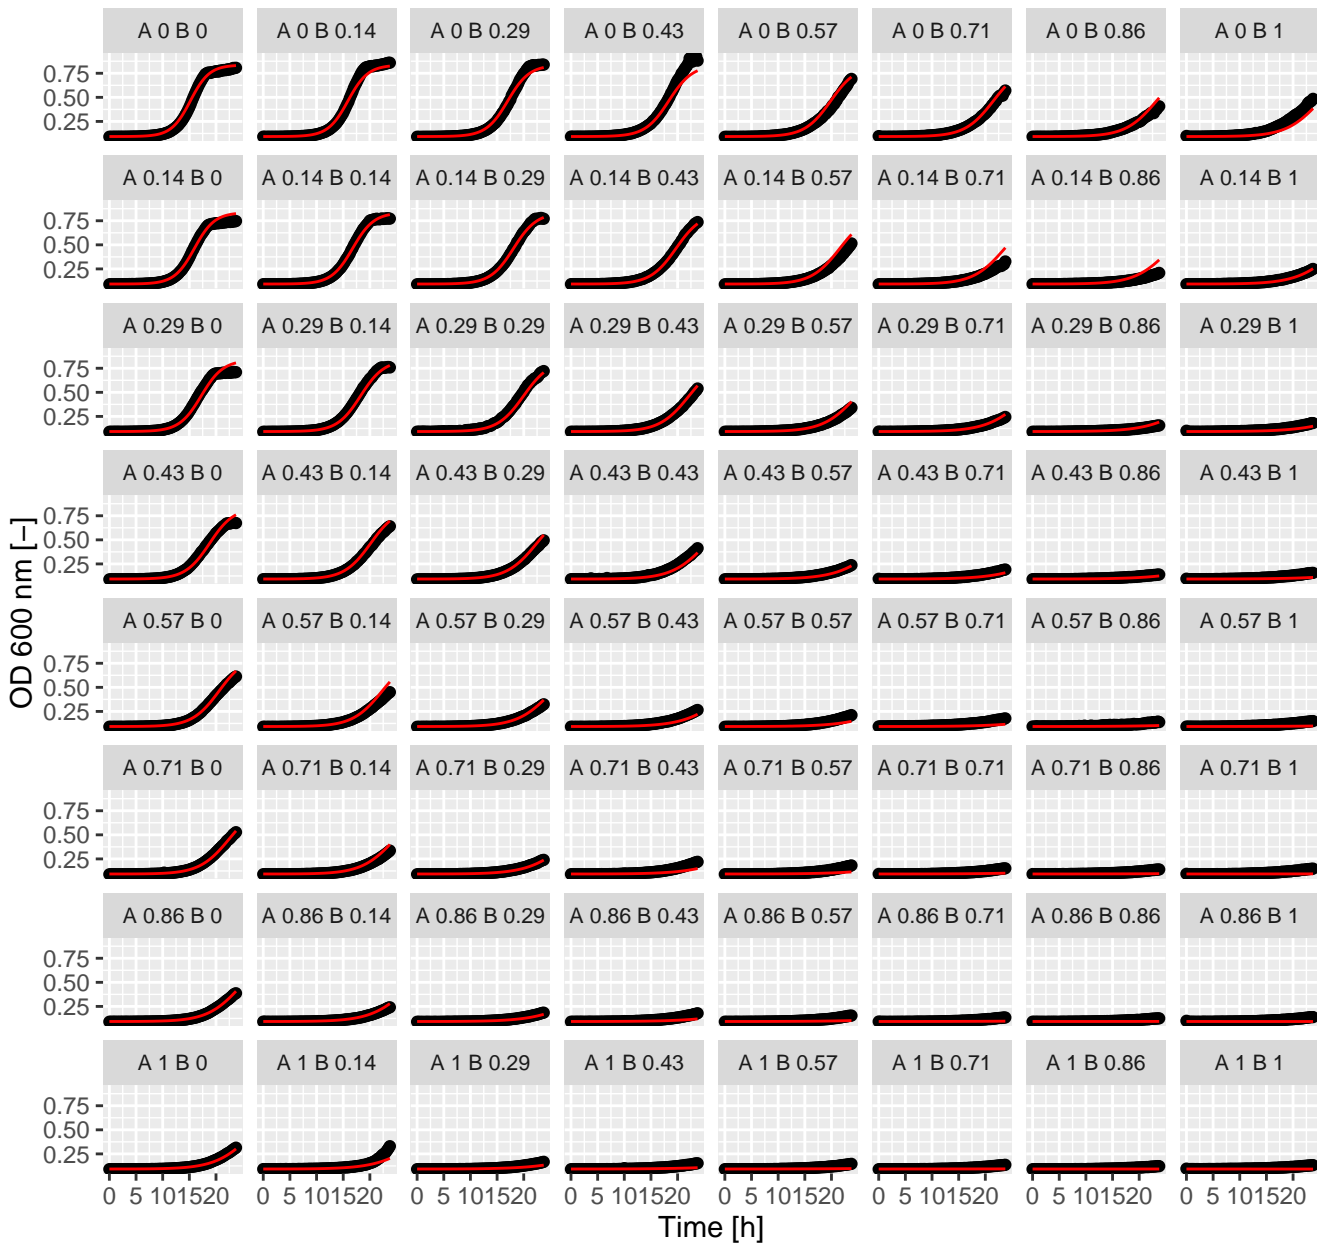



Lit.Rap (= Ax.Bx) Emp. Bliss  
beta = -24.59

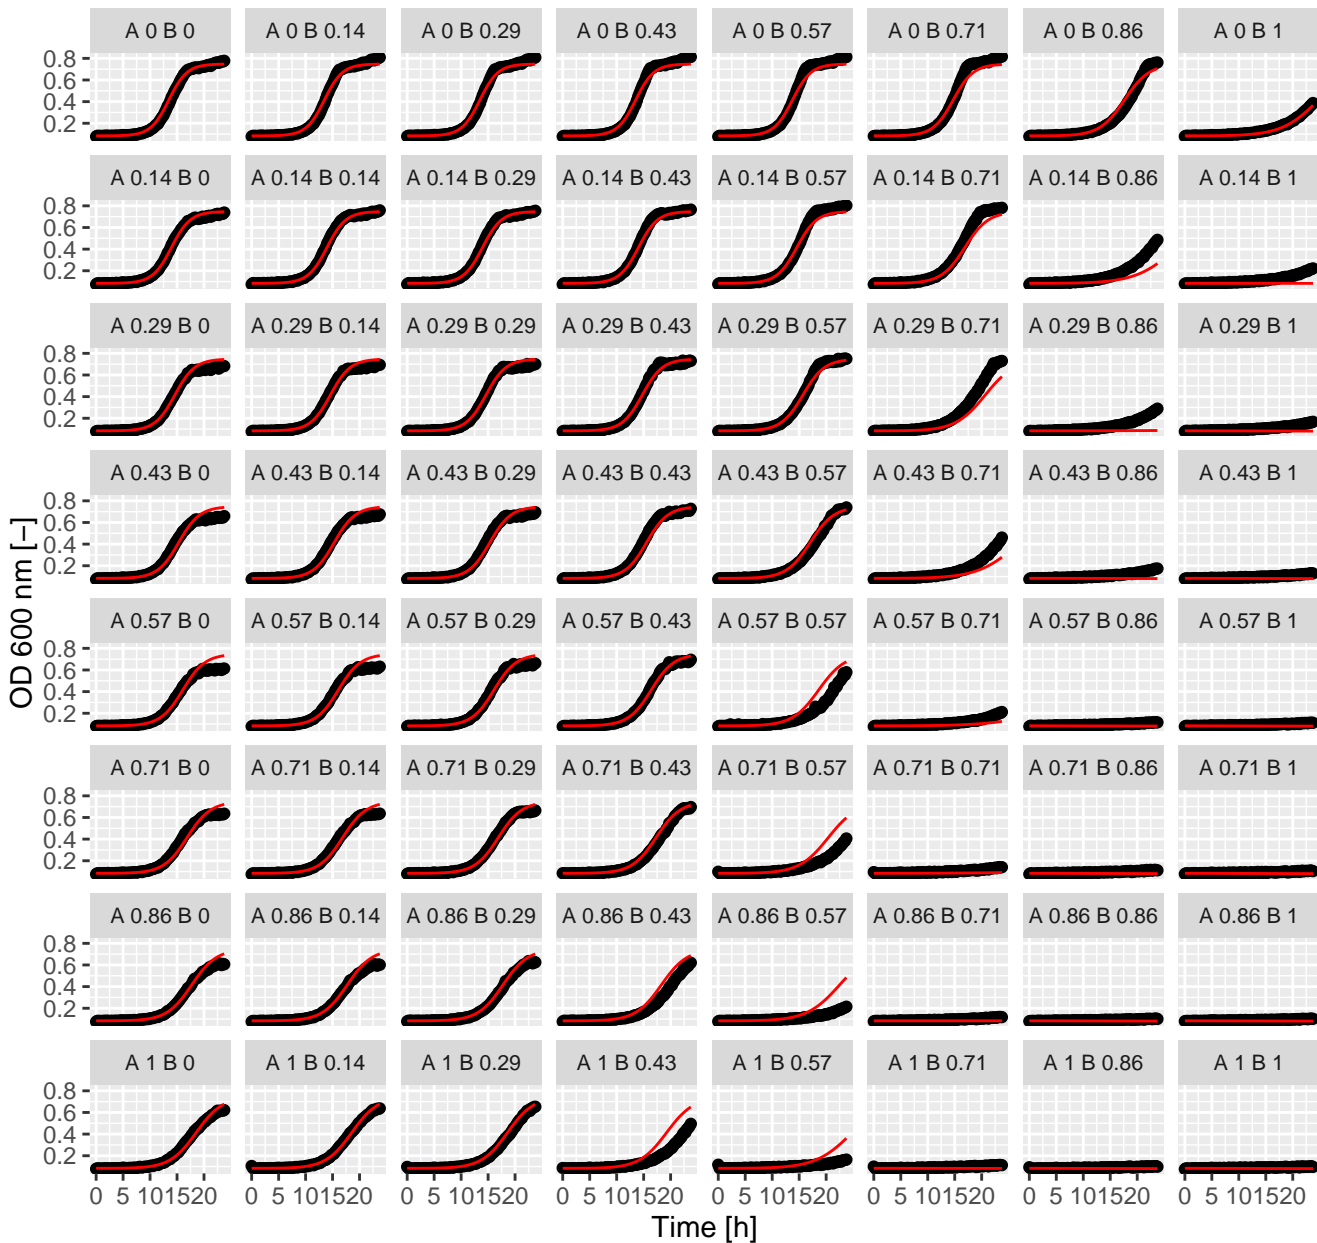

Lit.Sta (= Ax.Bx) Emp. Bliss  
beta = -2.39

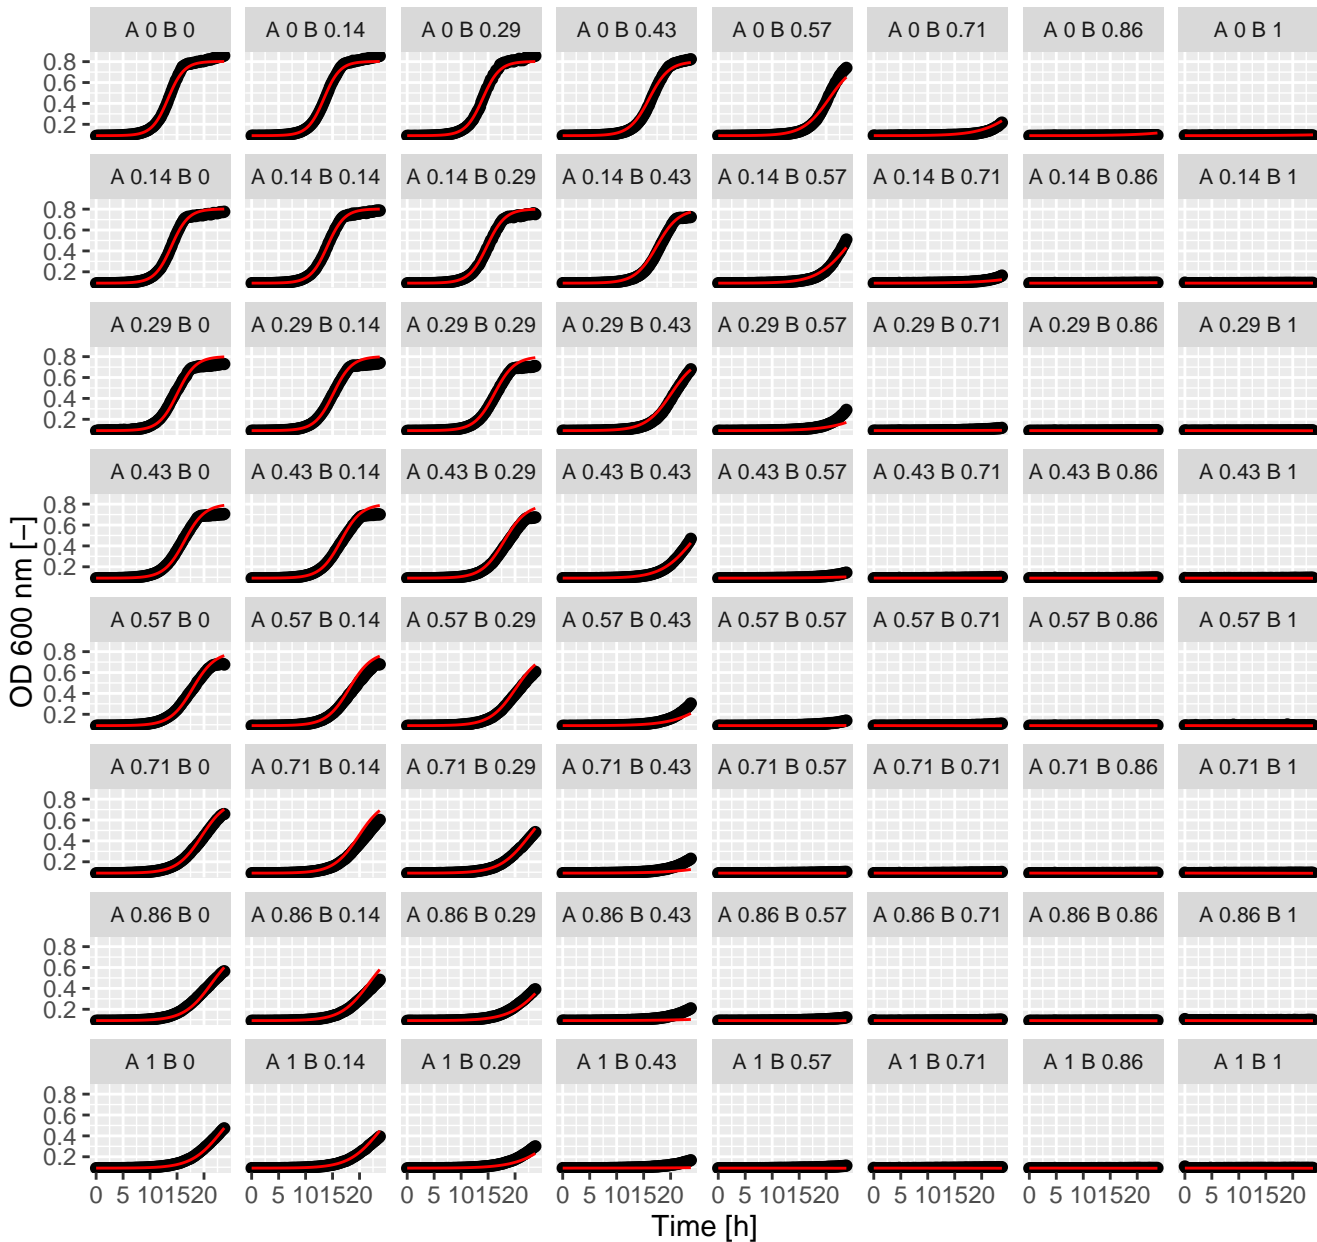

Lit. Tac (= Ax.Bx) Emp. Bliss  
beta = -4.69

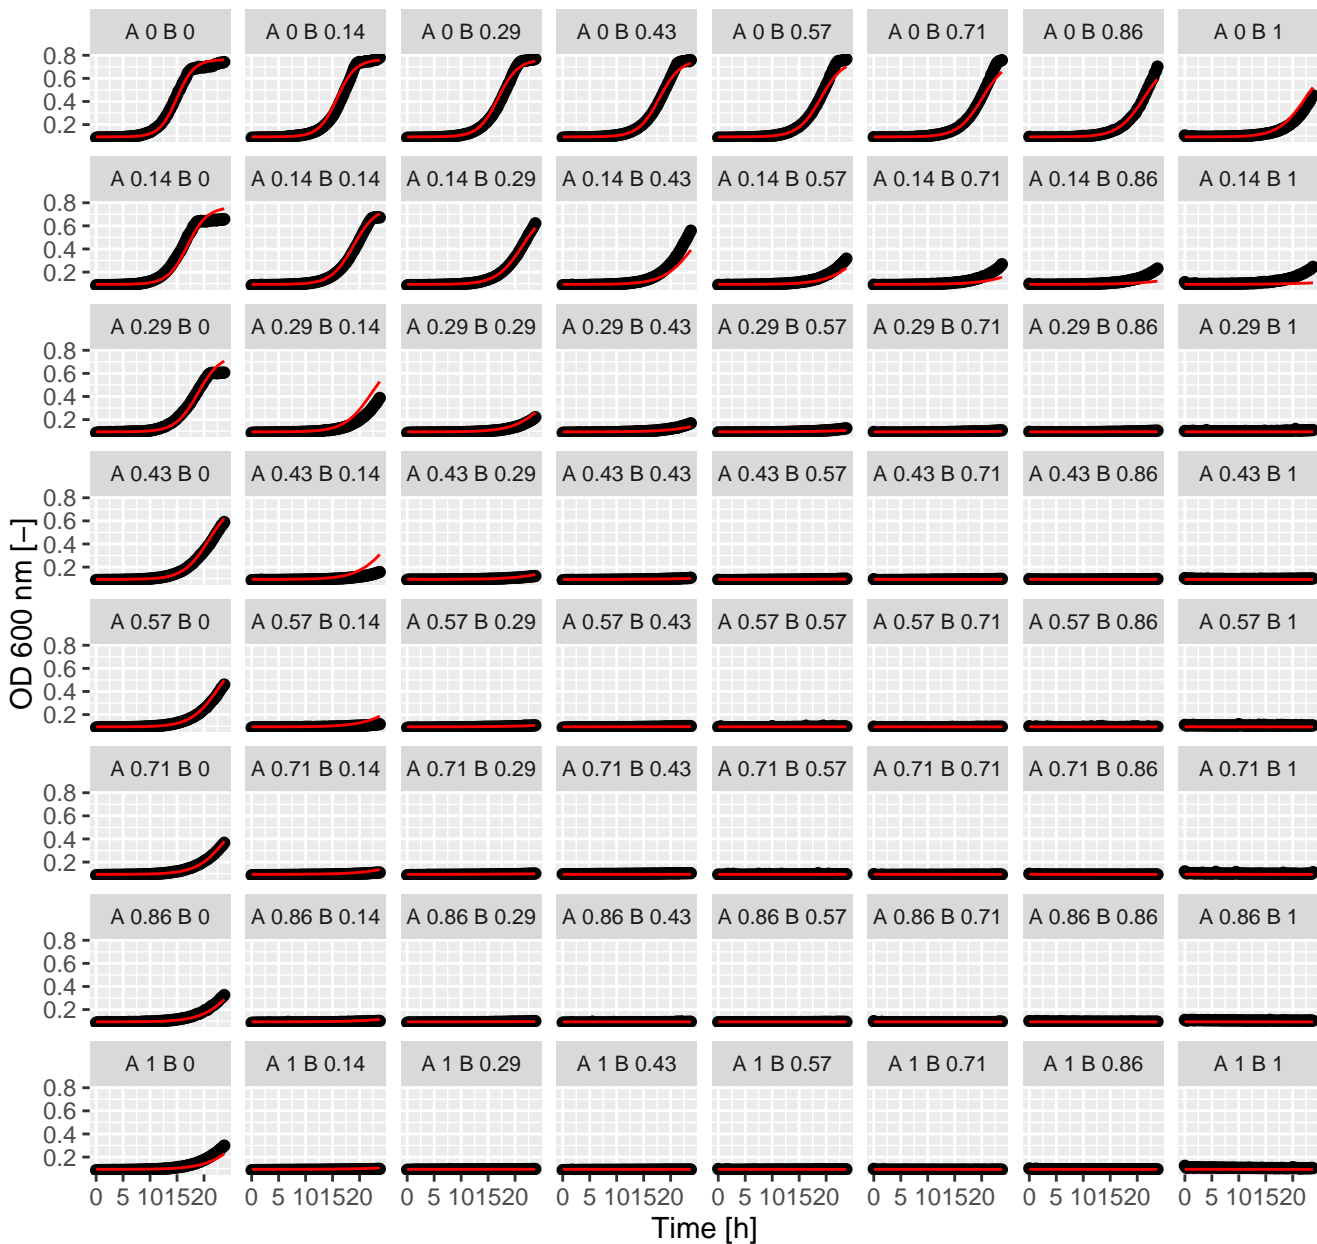



Met.Pen (= Ax.Bx) Emp. Bliss  
beta = 1.97

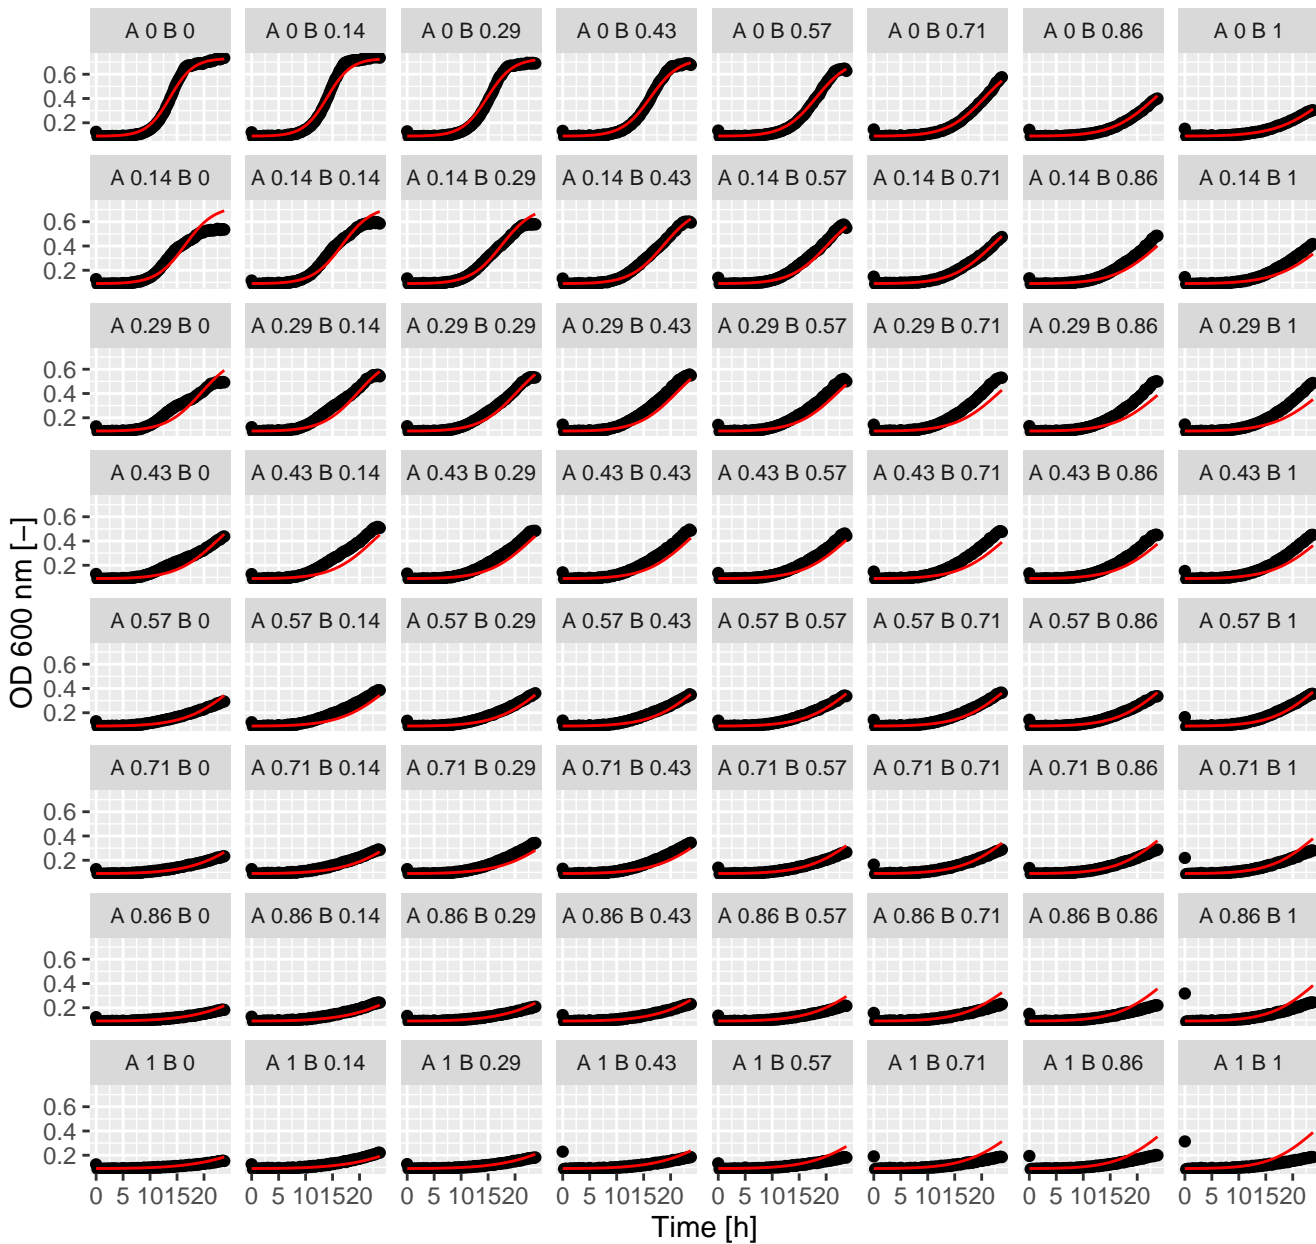

Met.Sta (= Ax.Bx) Emp. Bliss  
beta = 2.14

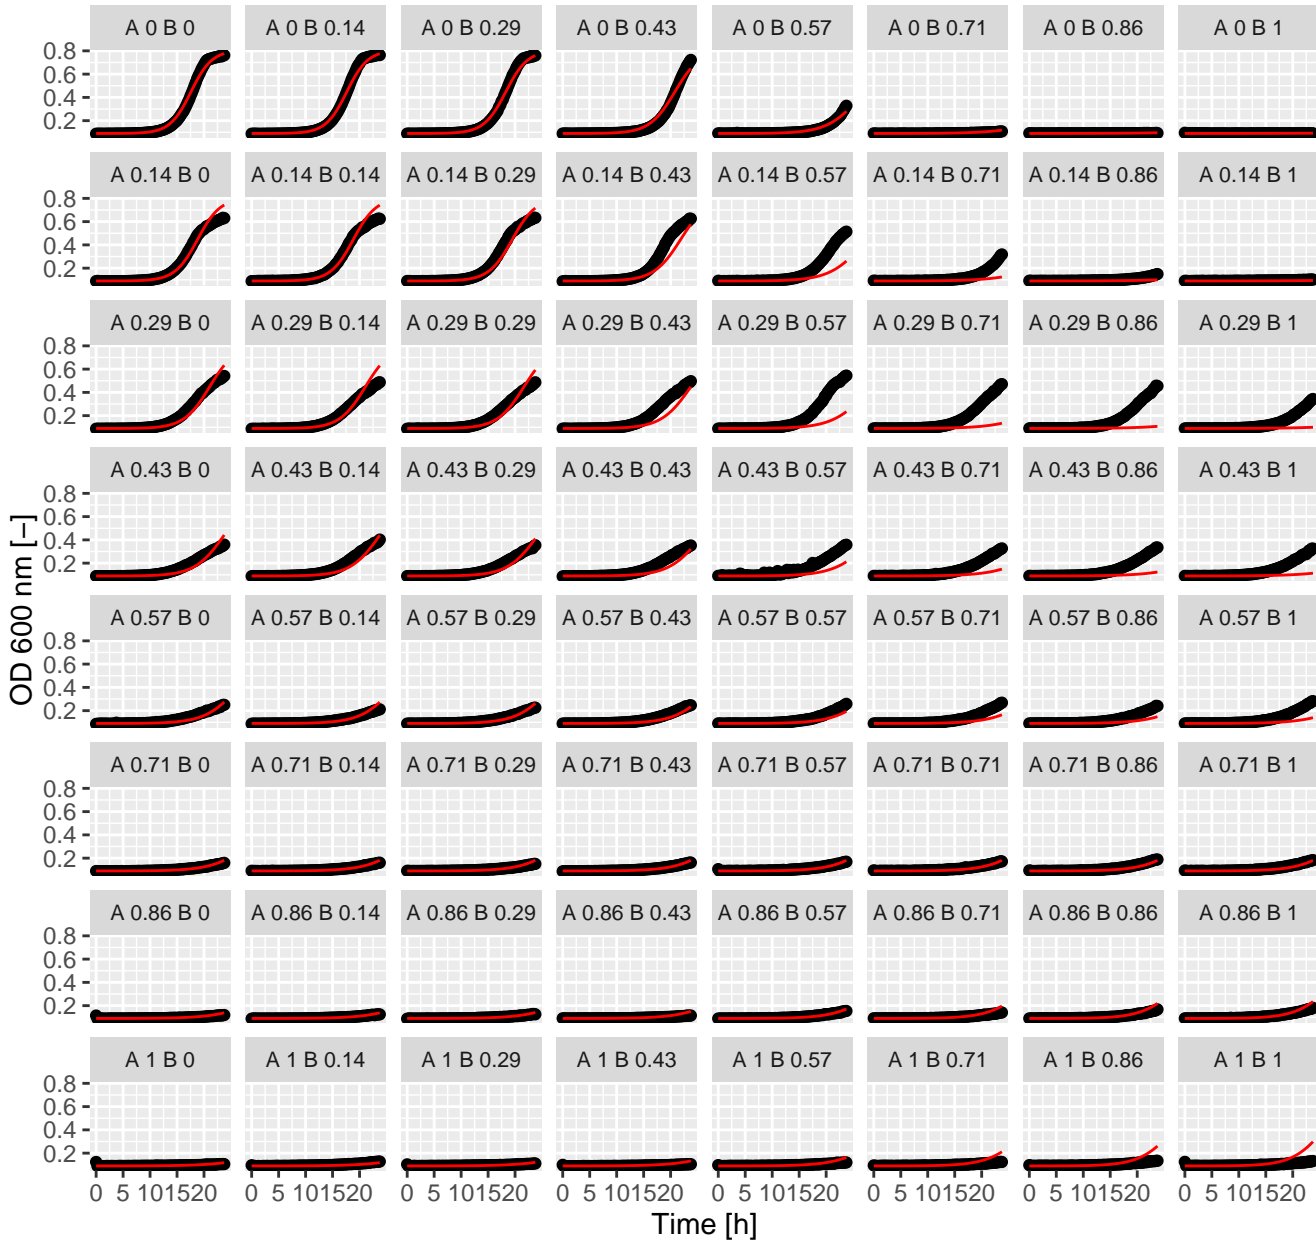

Met.Tac (= Ax.Bx) Emp. Bliss  
beta = 1.96

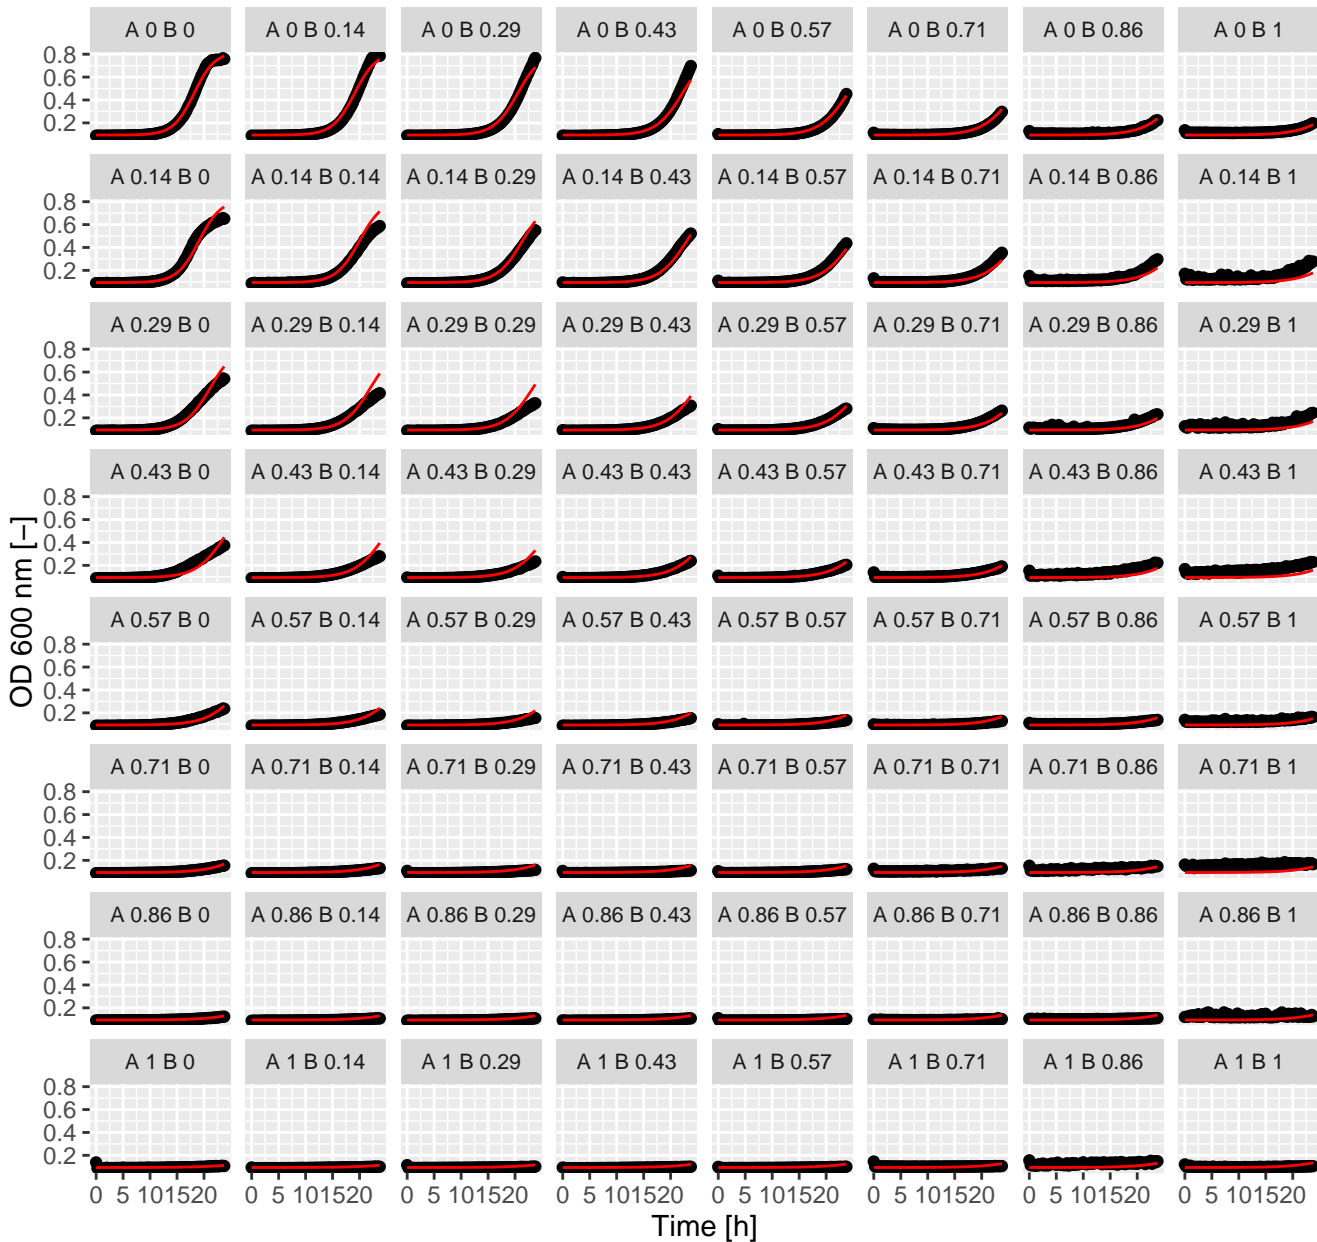

Met.Ter (= Ax.Bx) Emp. Bliss  
beta = 1.47

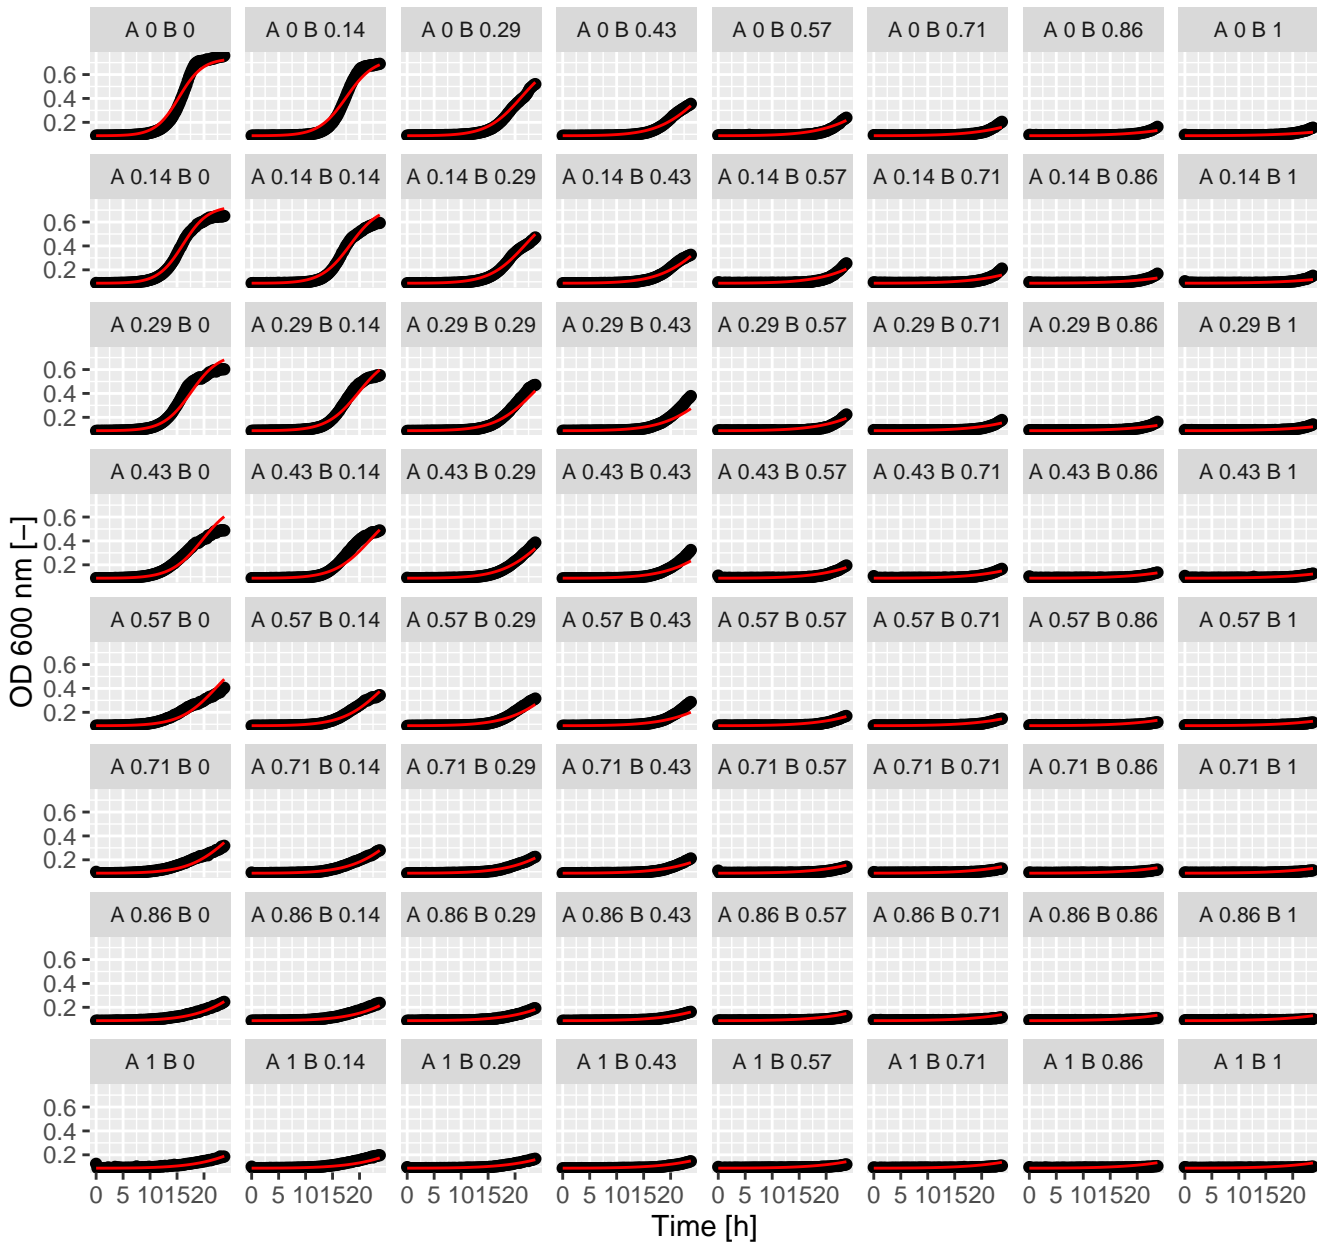



## MMS.MMS (= Ax.Bx) Emp. Bliss

beta = -0.12

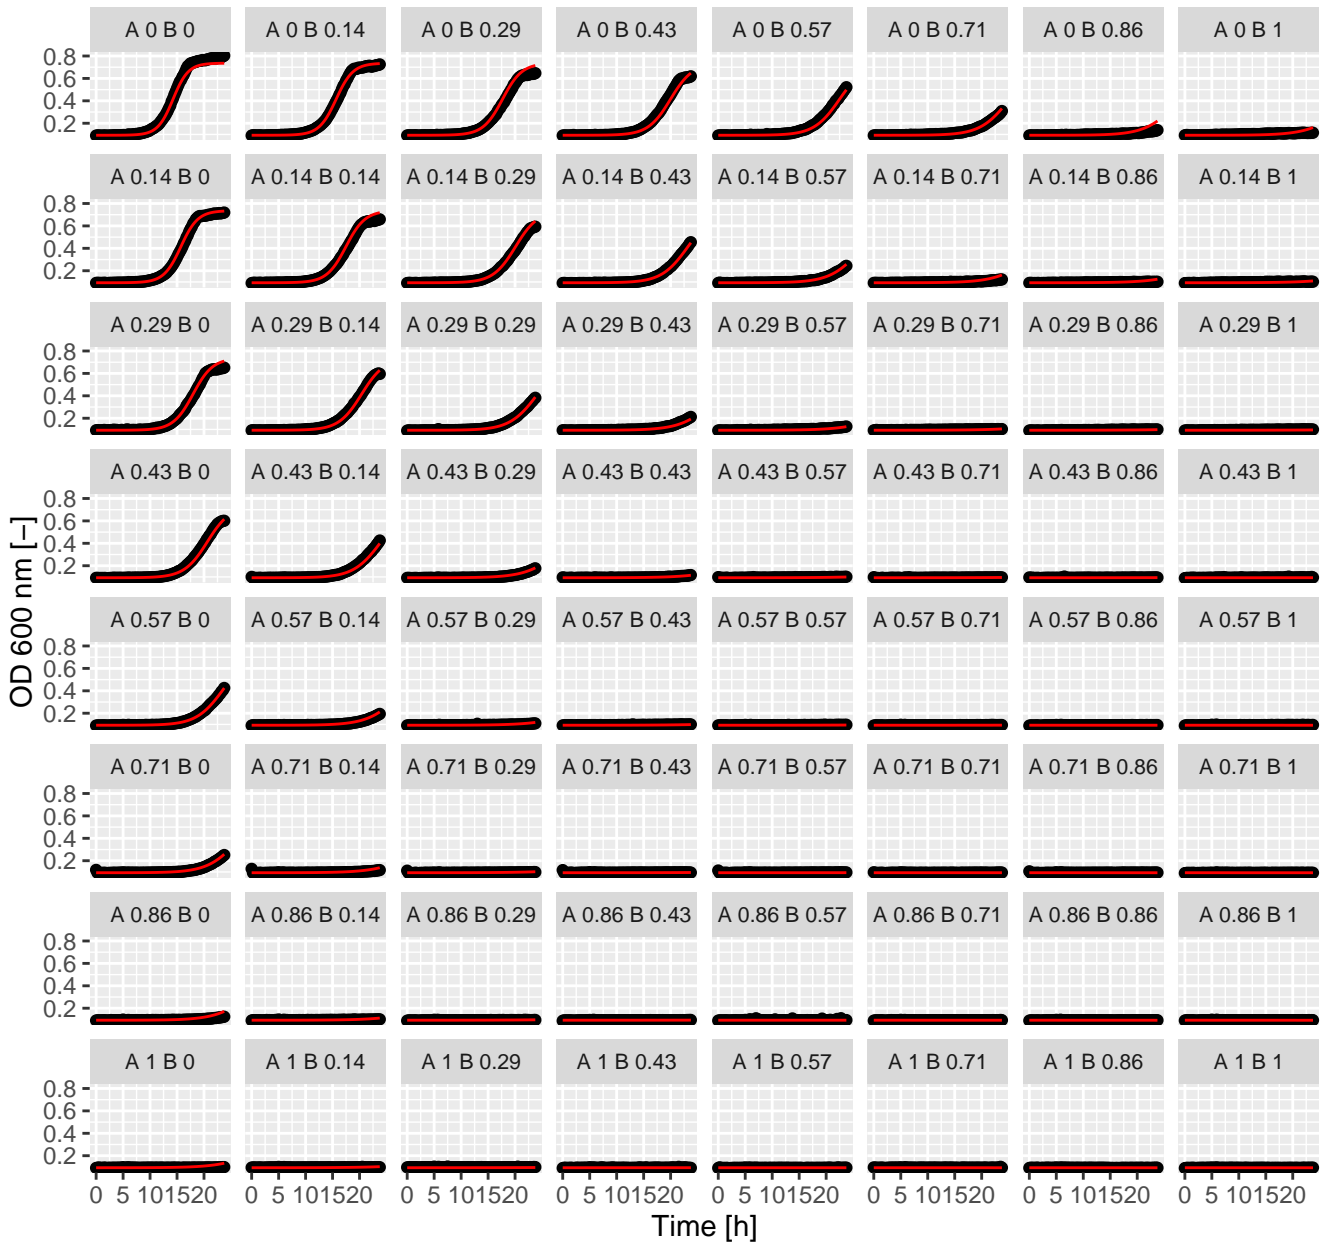

MMS.Pen (= Ax.Bx) Emp. Bliss  
beta = 0.16

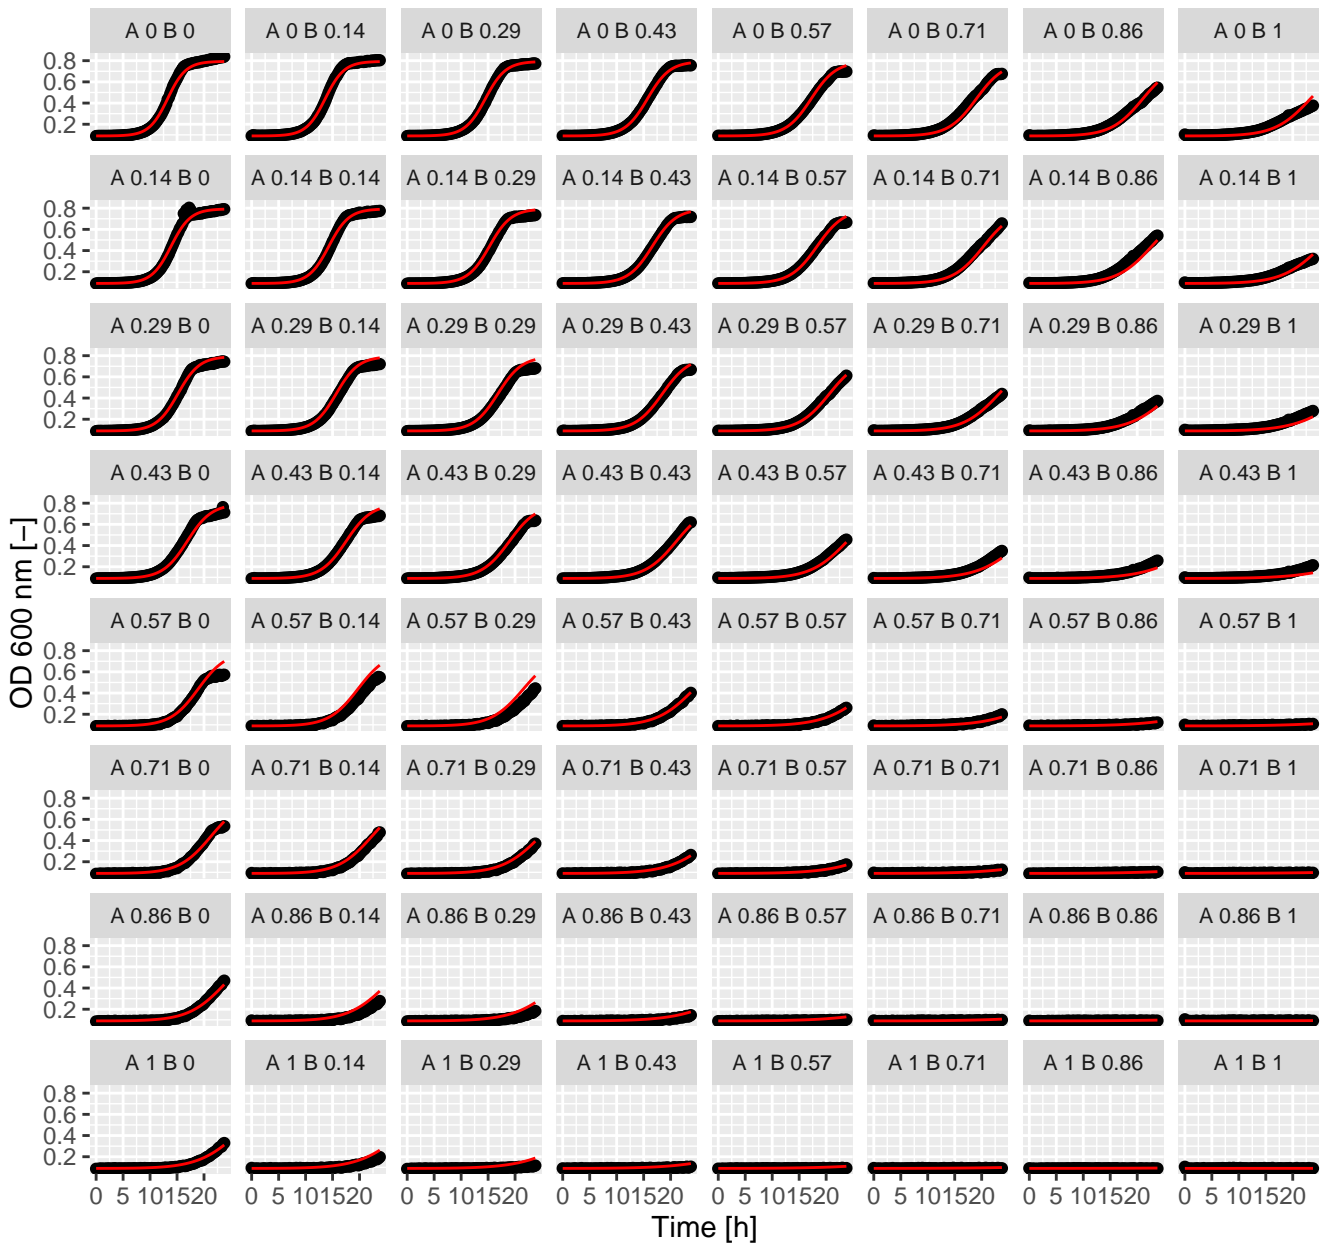

MMS.Sta (= Ax.Bx) Emp. Bliss  
beta = -0.3

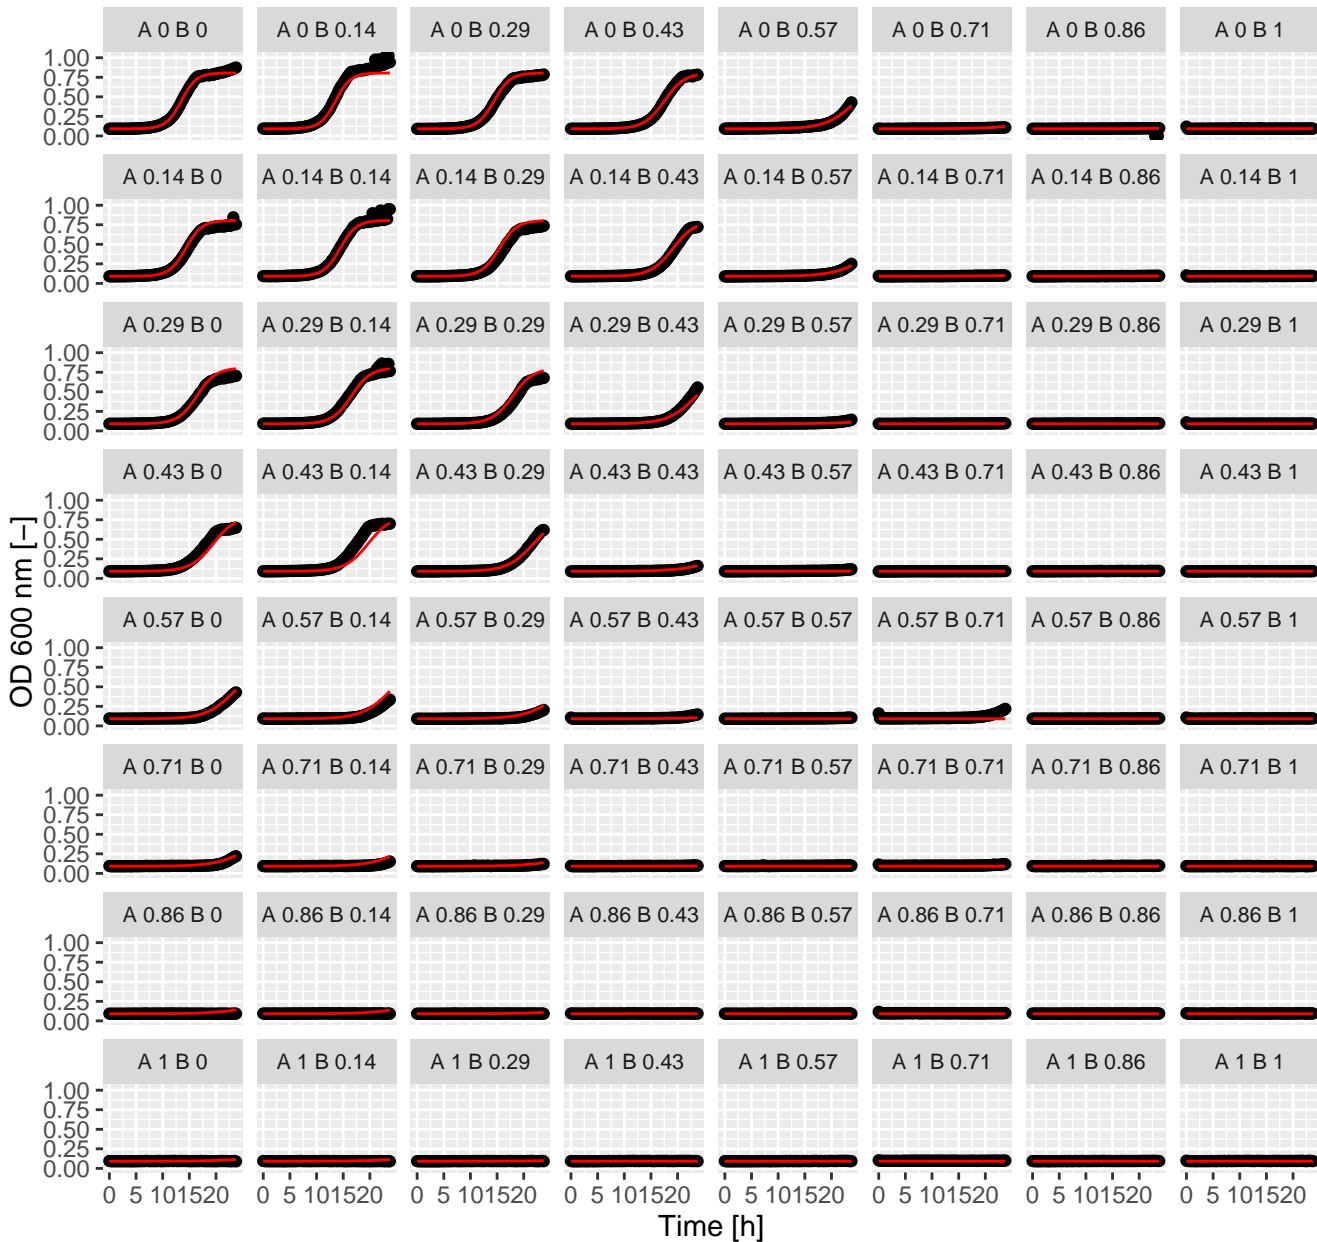

MMS.Tac (= Ax.Bx) Emp. Bliss  
beta = 0.5

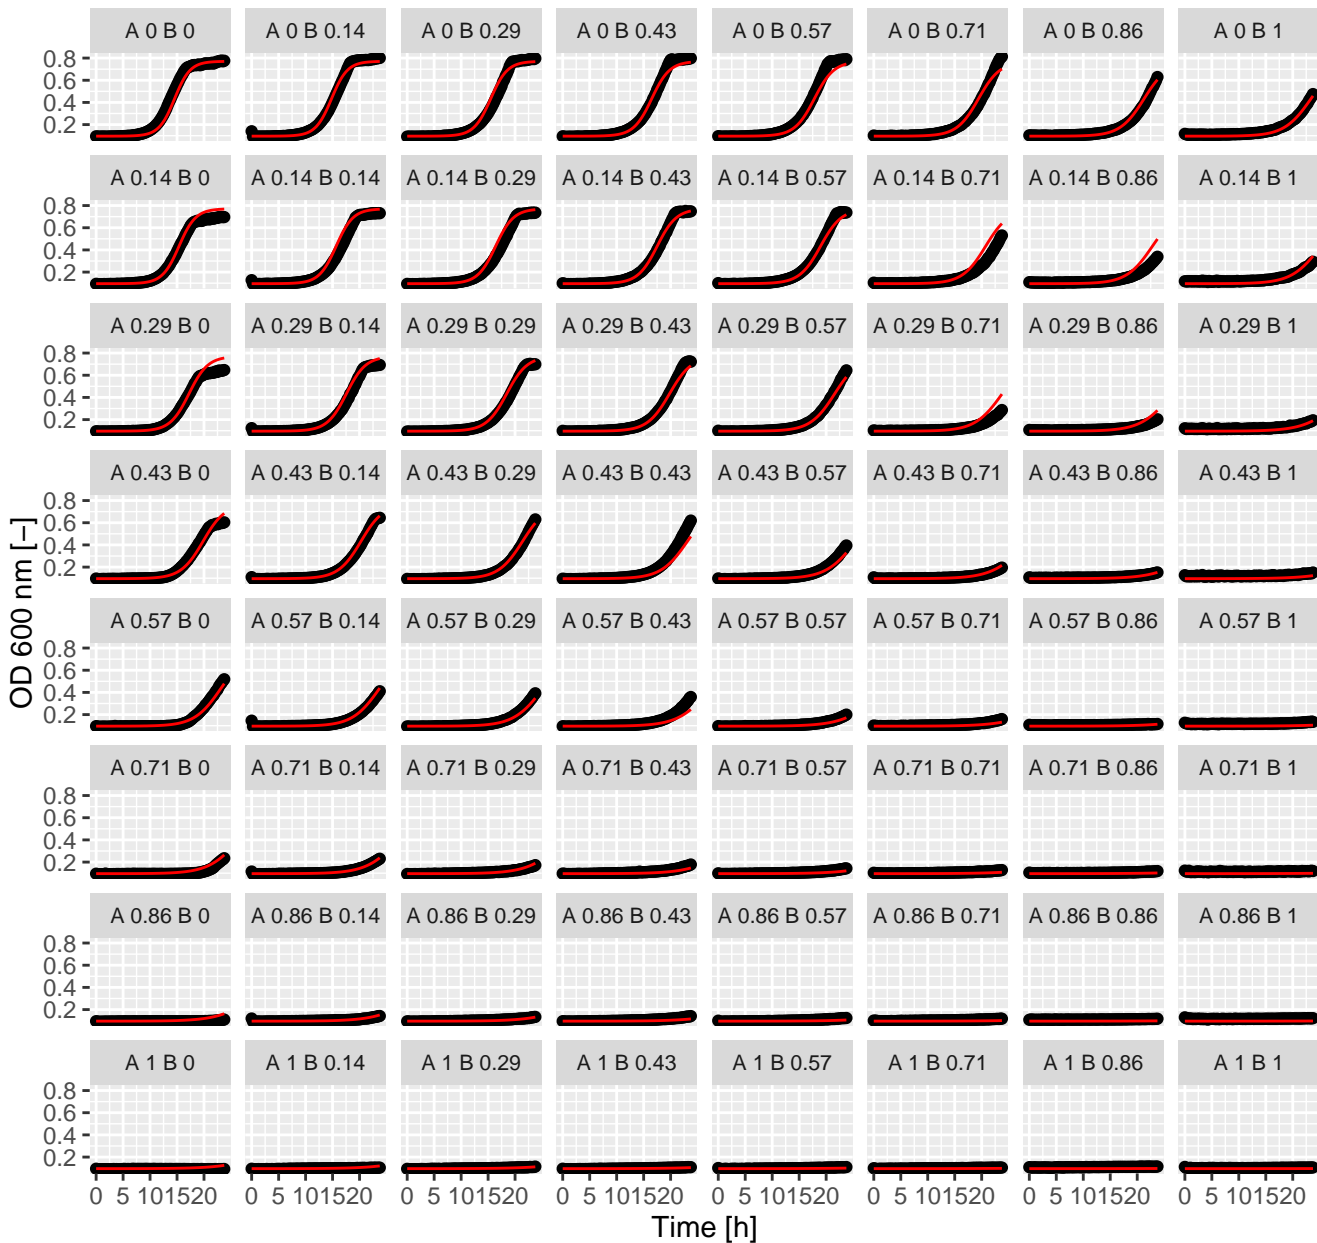

MMS.Ter (= Ax.Bx) Emp. Bliss  
beta = 1.32

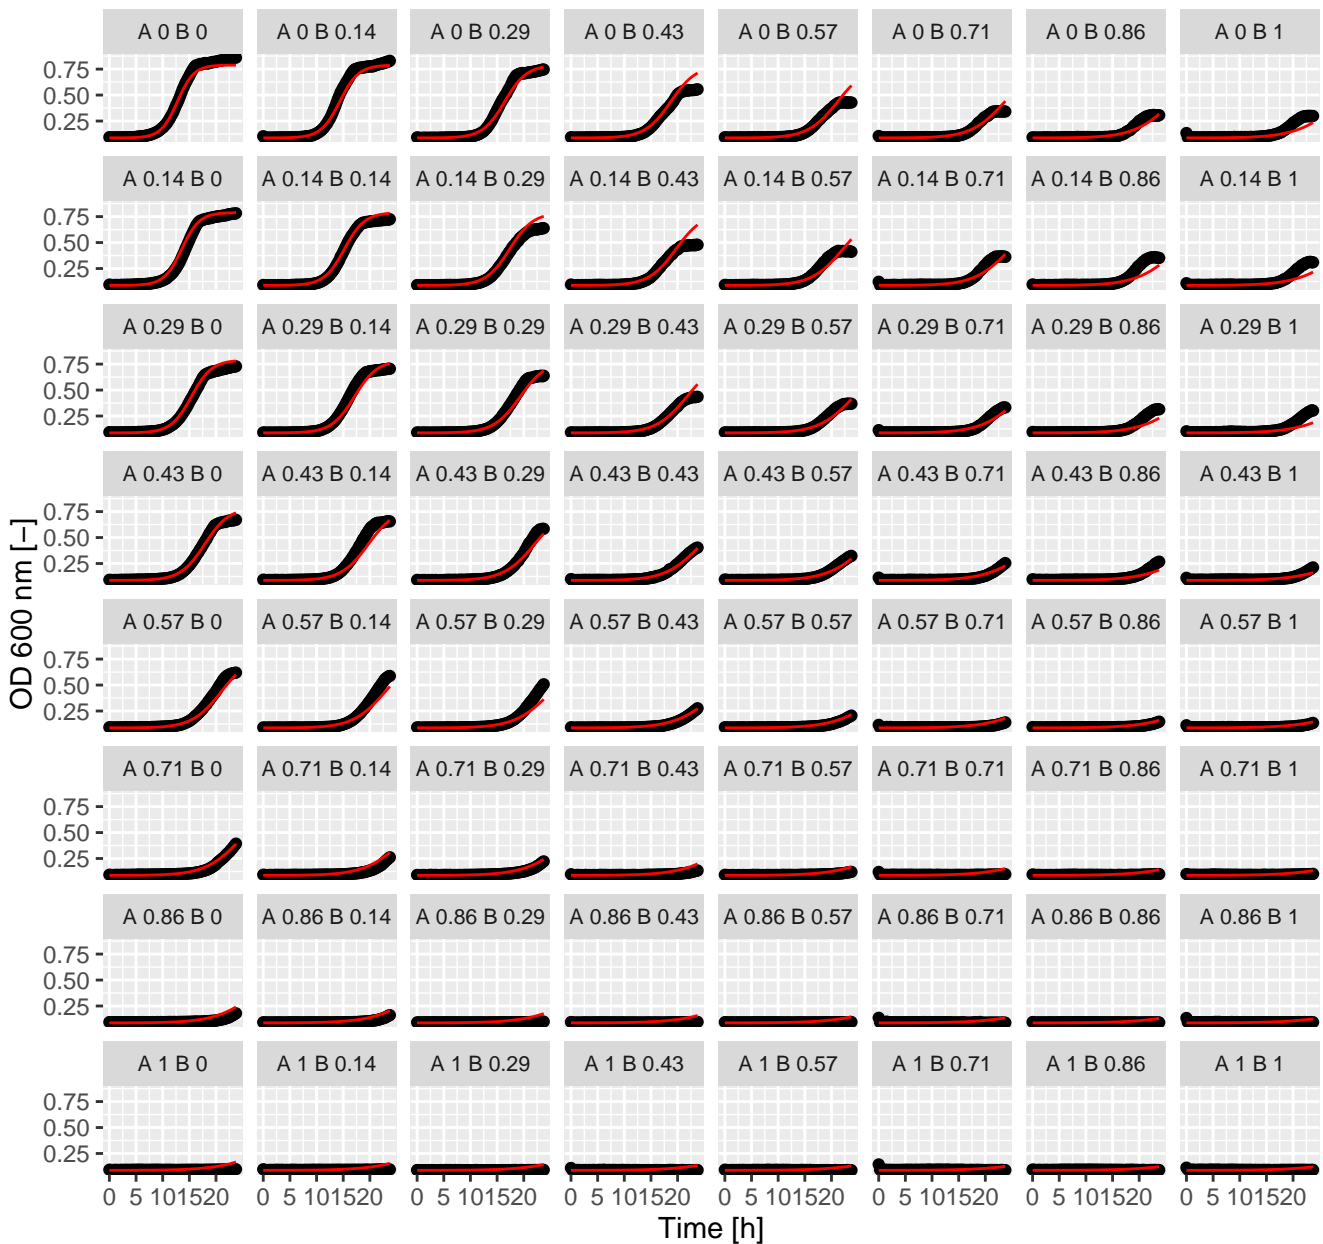

Myr.Myr (= Ax.Bx) Emp. Bliss  
beta = -268.5

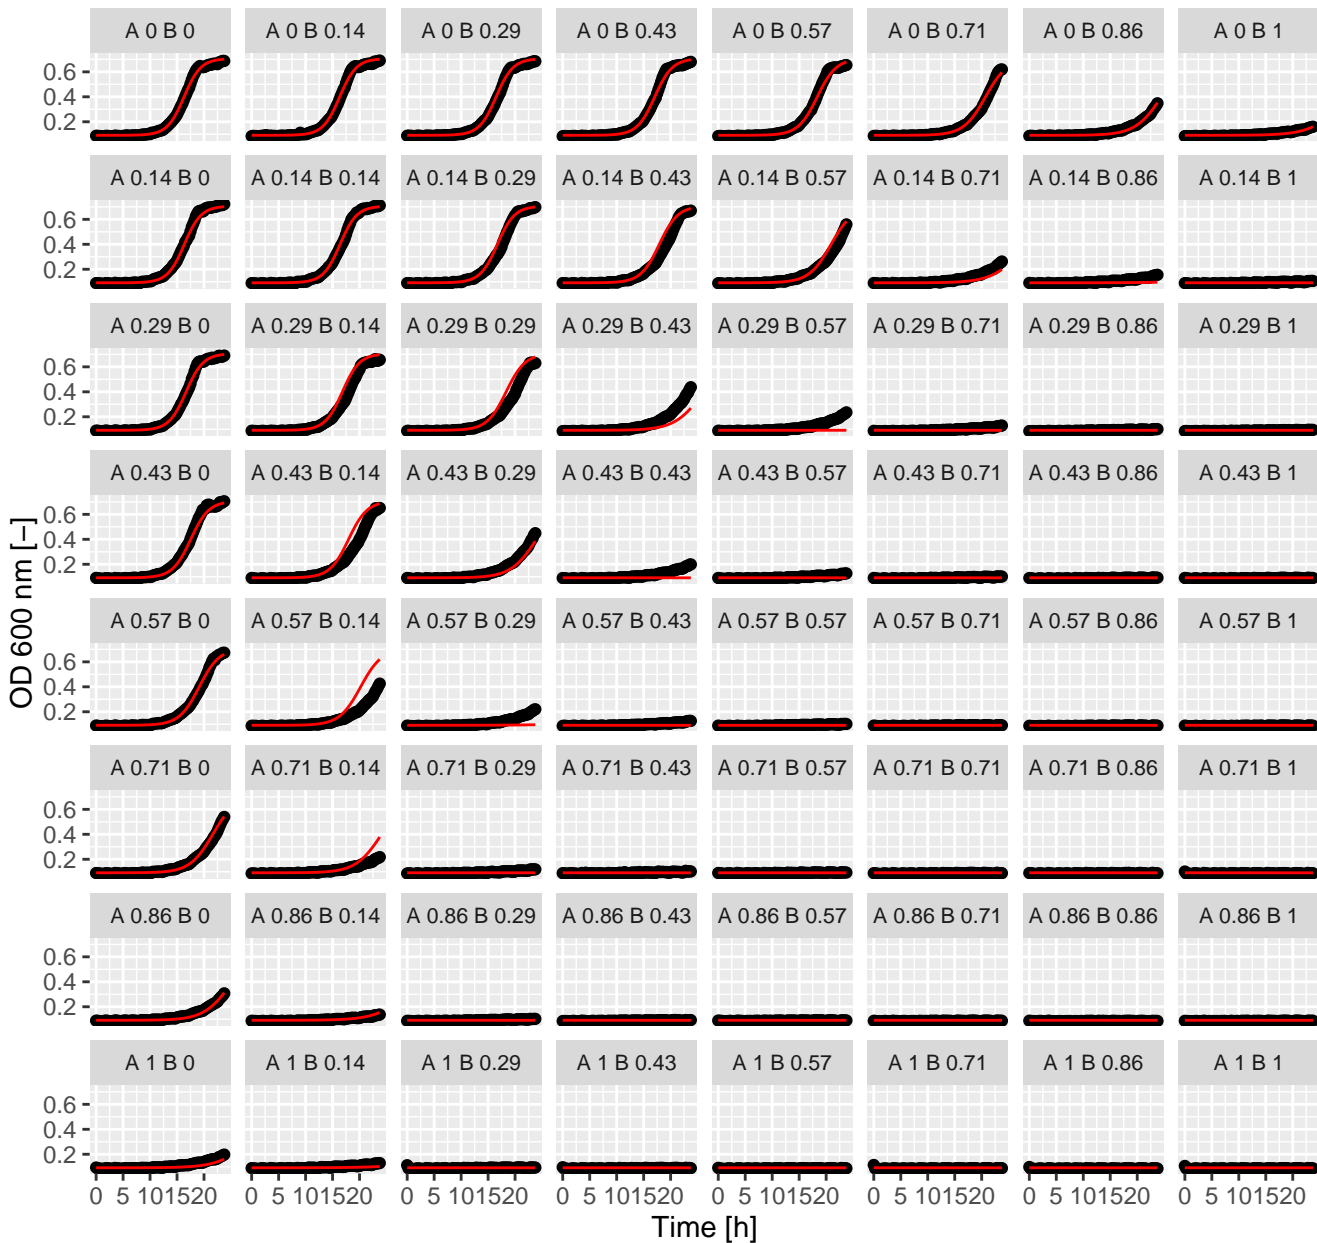

Myr.Pen (= Ax.Bx) Emp. Bliss  
beta = -6.18

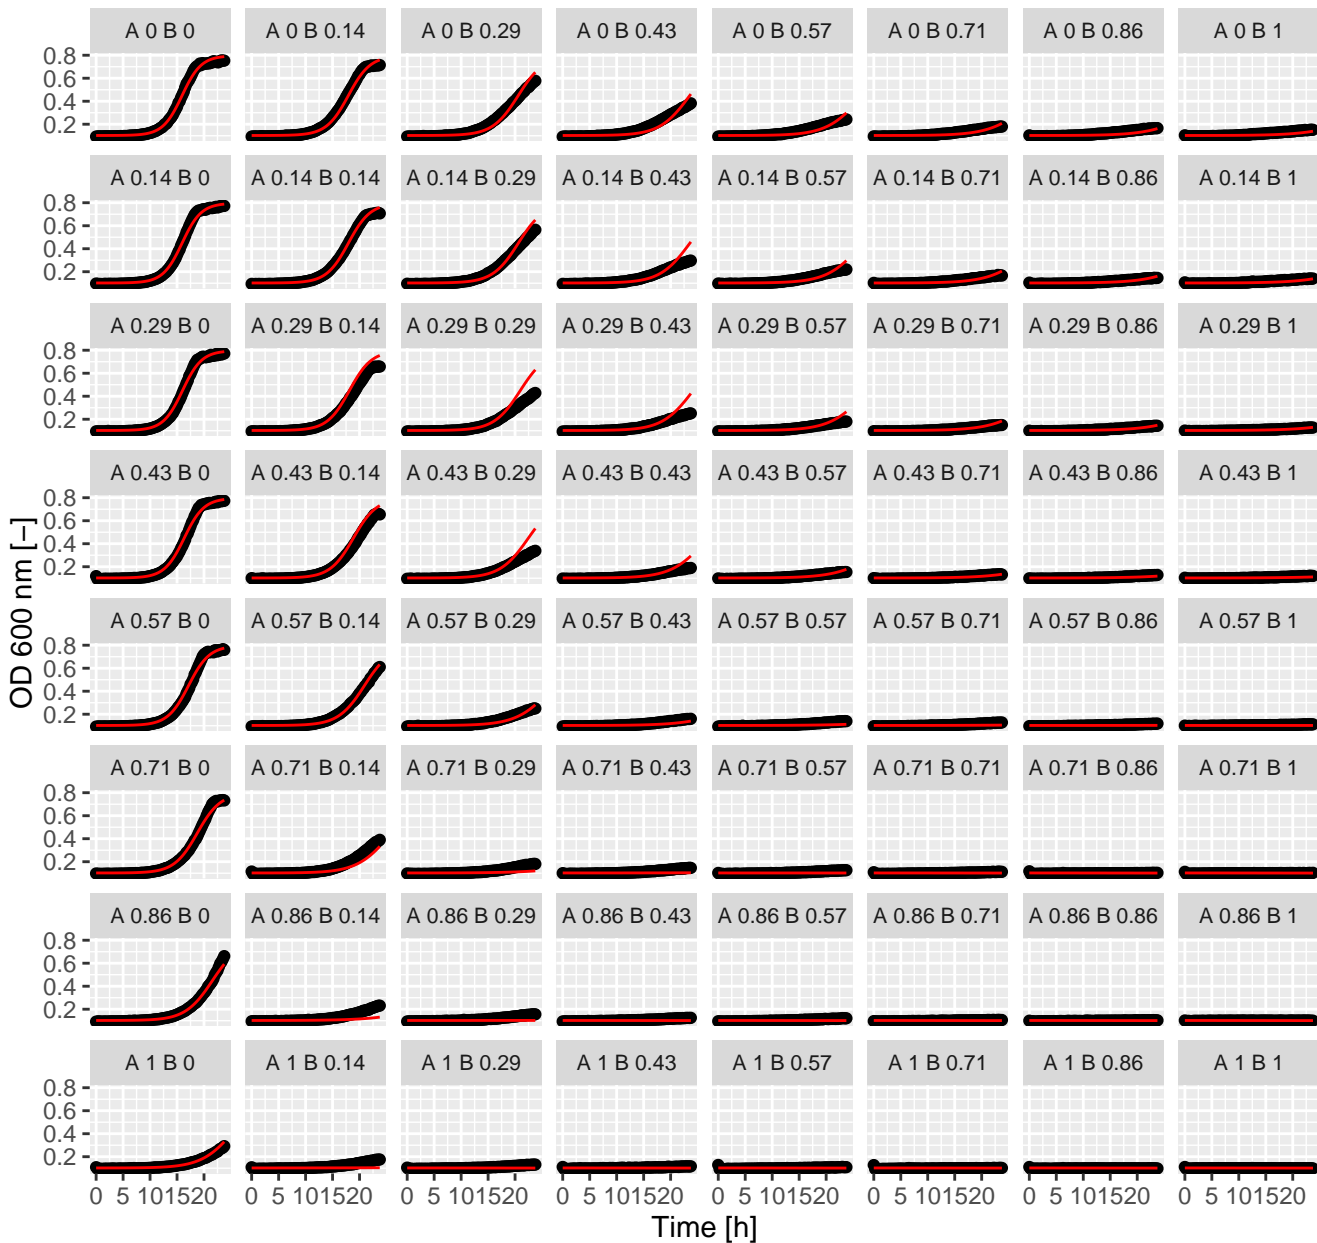

Myr.Qnn (= Ax.Bx) Emp. Bliss  
beta = 2.25

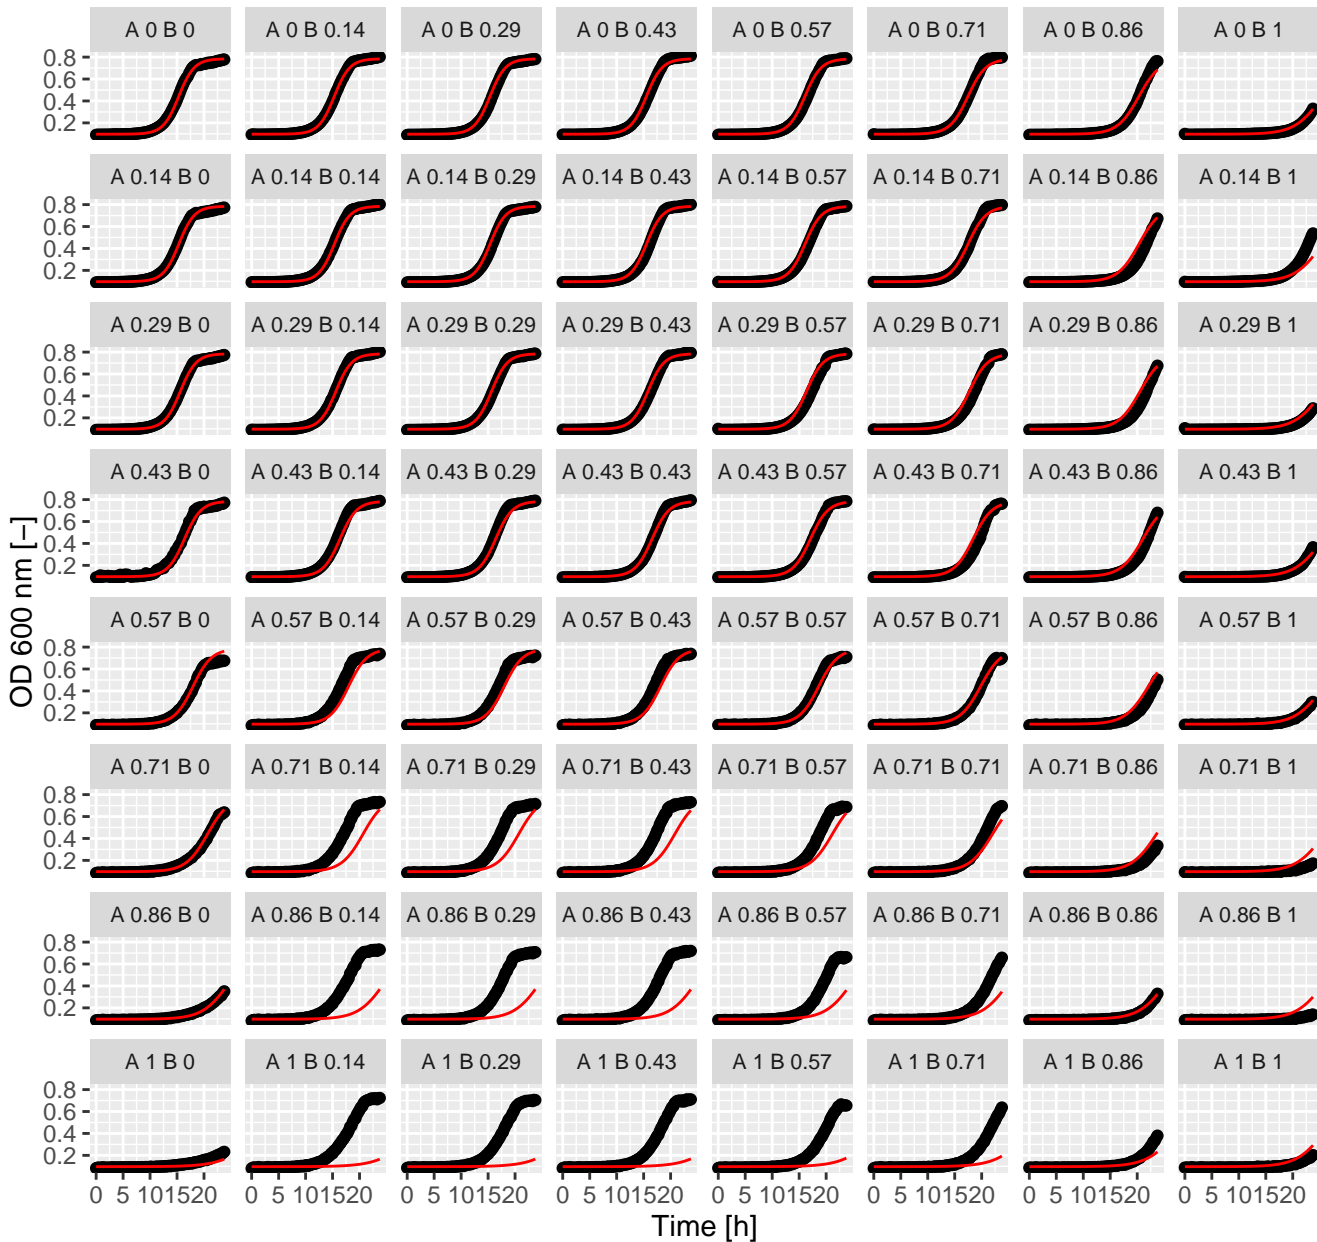



Myr.Rad (= Ax.Bx) Emp. Bliss  
beta = -42

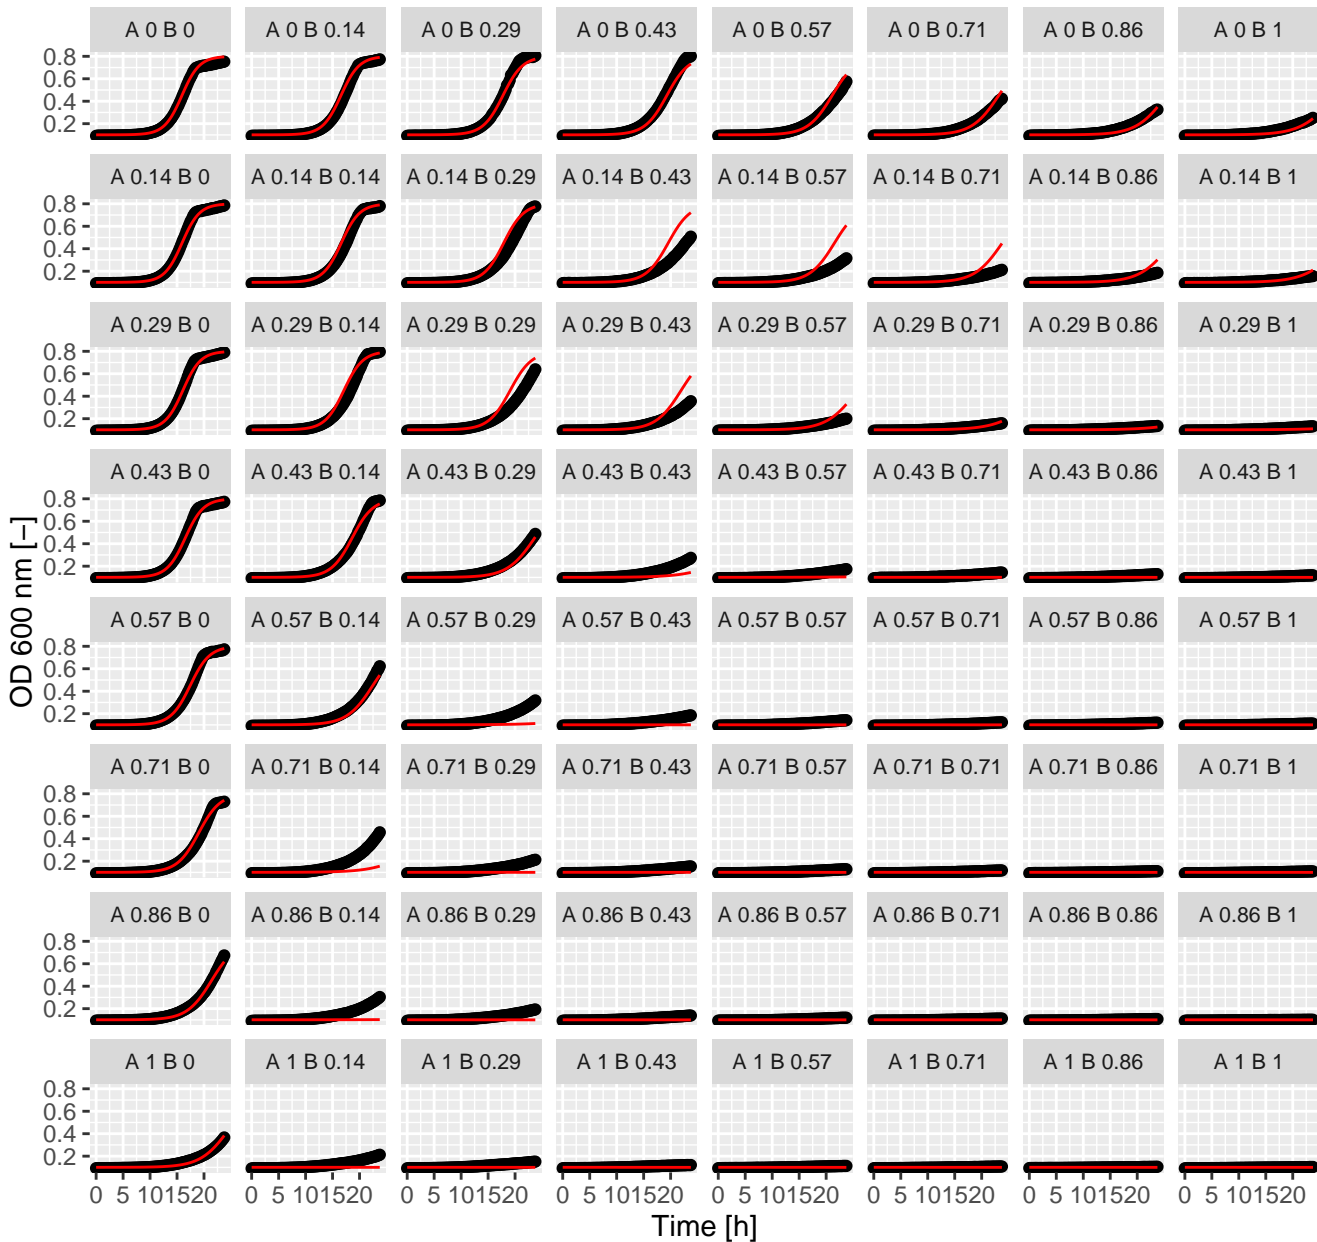

Myr.Sta (= Ax.Bx) Emp. Bliss  
beta = 2.51

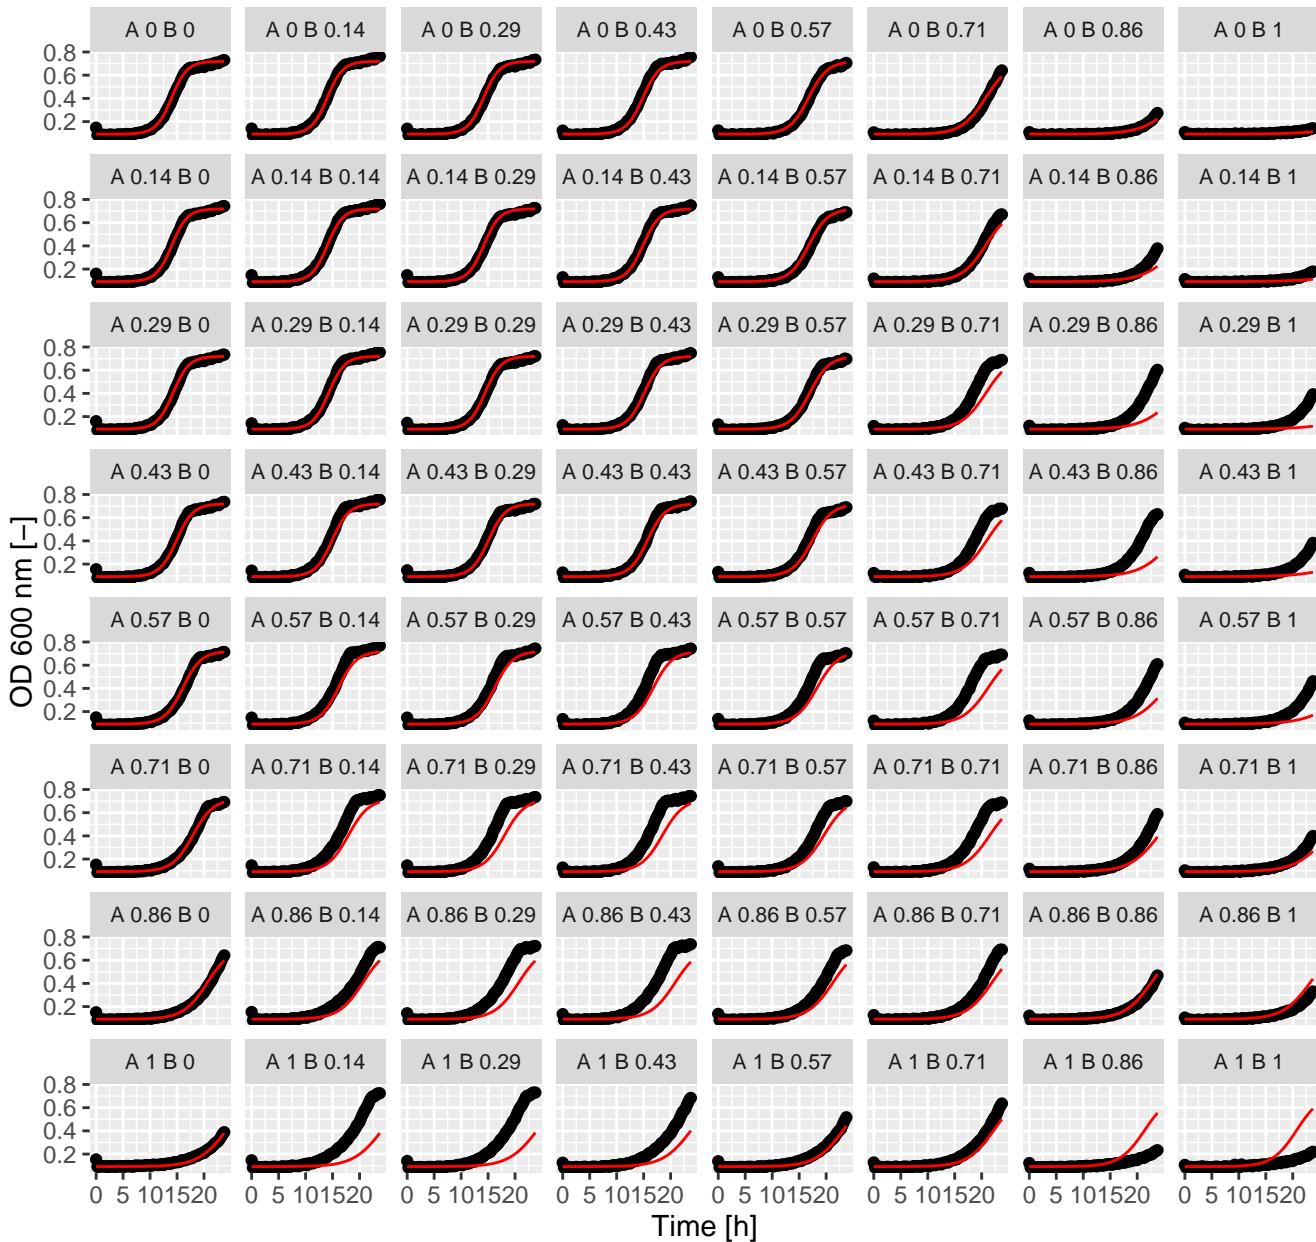

Myr.Tac (= Ax.Bx) Emp. Bliss  
beta = -2.11

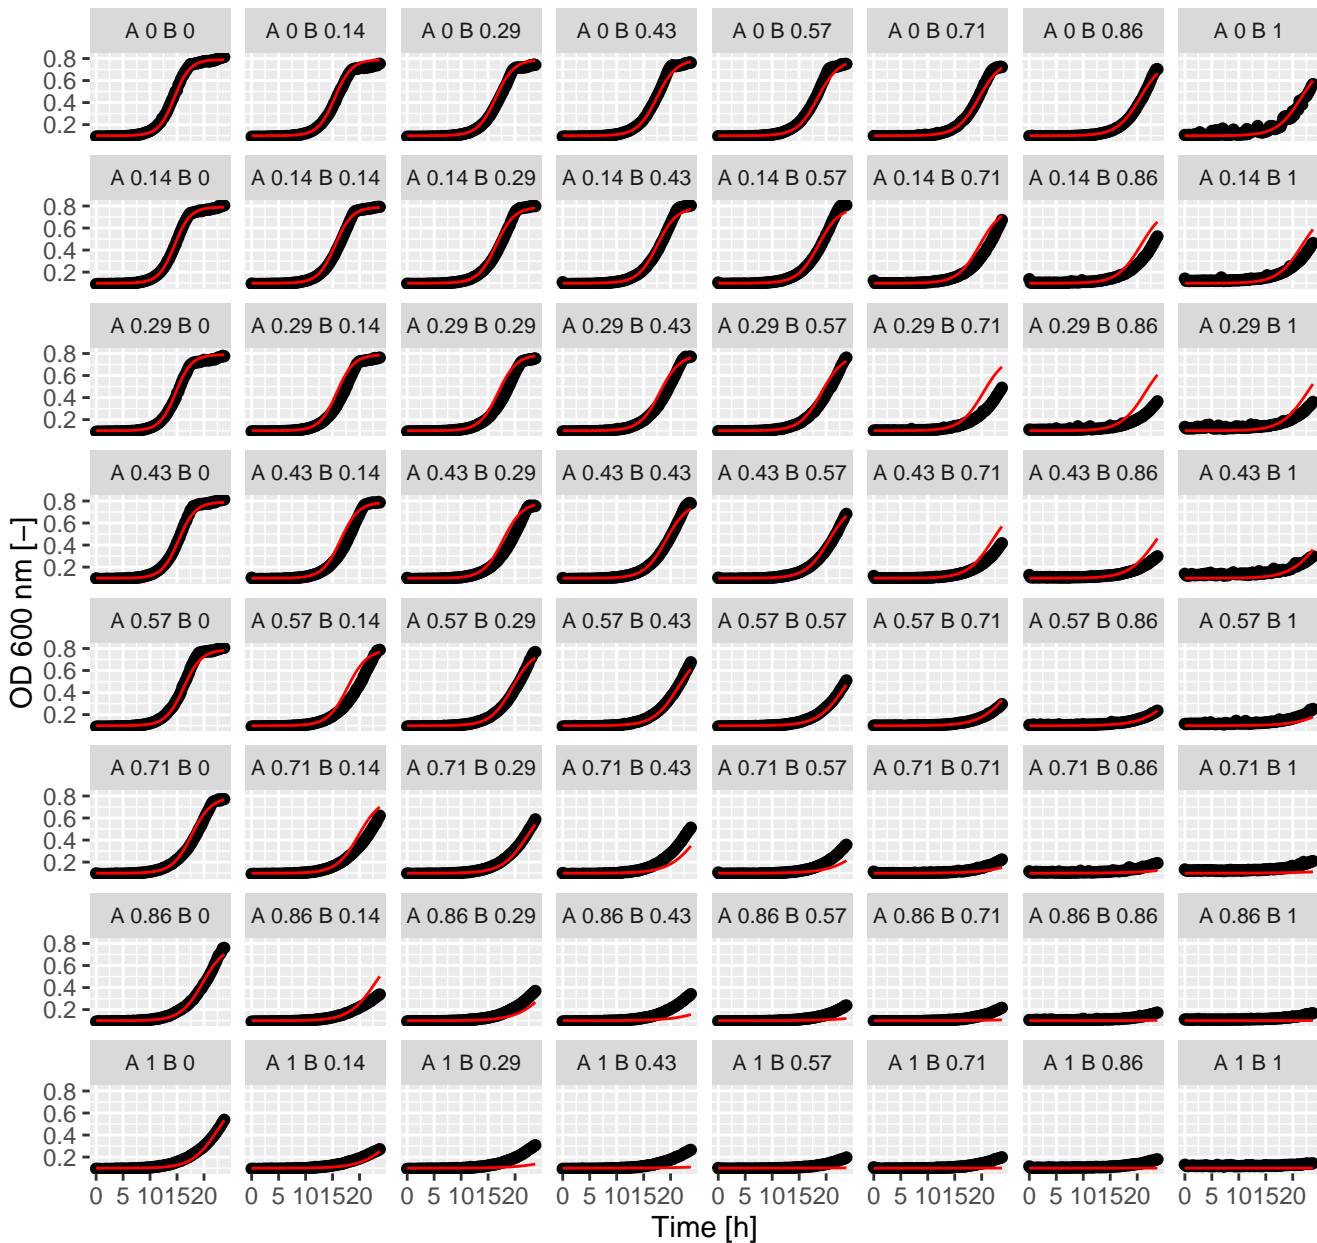

Myr.Ter (= Ax.Bx) Emp. Bliss  
beta = 2.41

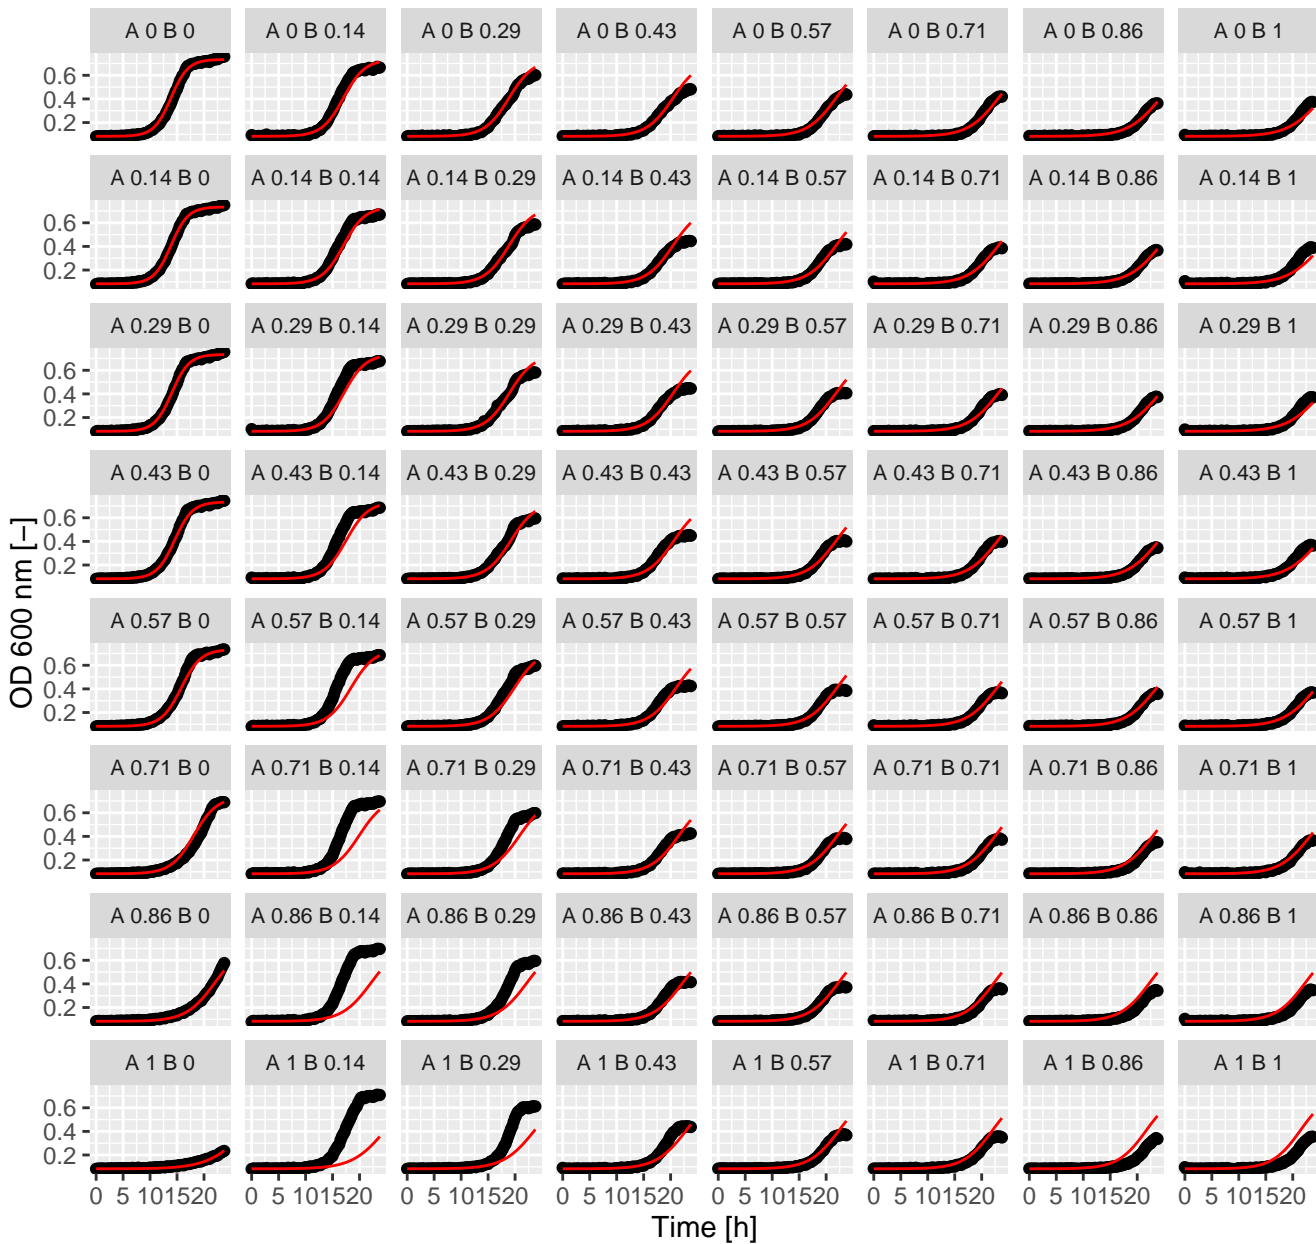

Pen.Qmy (= Ax.Bx) Emp. Bliss  
beta = -54.85

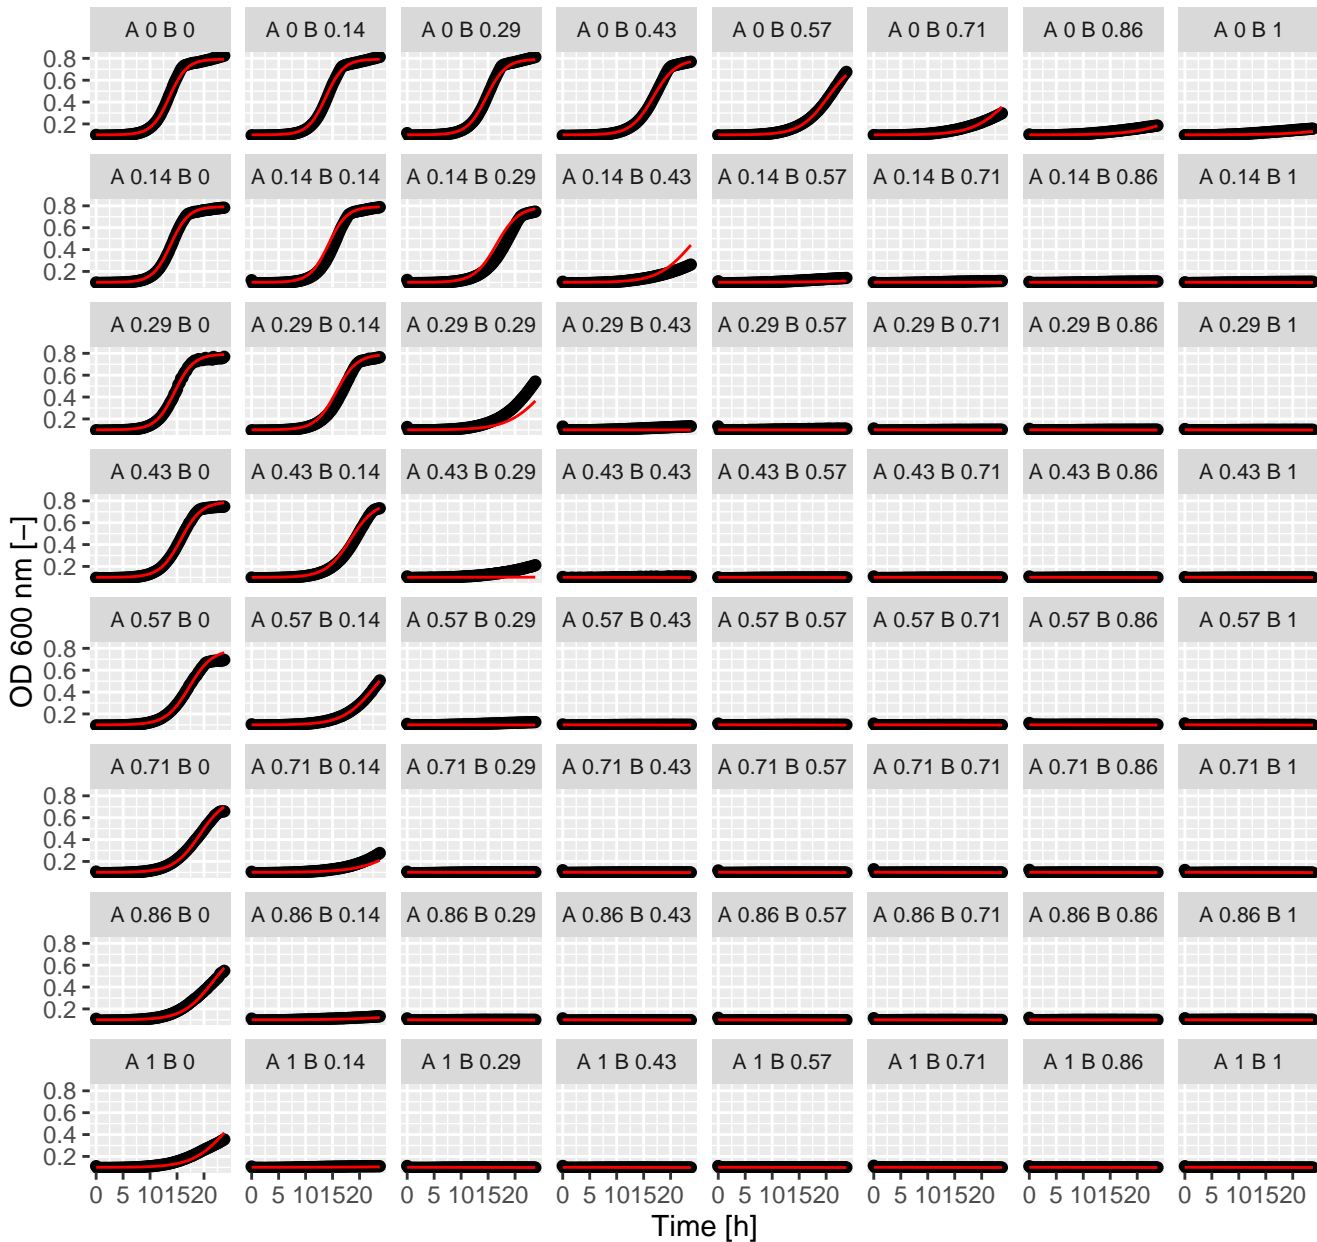

Pen.Rad (= Ax.Bx) Emp. Bliss  
beta = -9.08

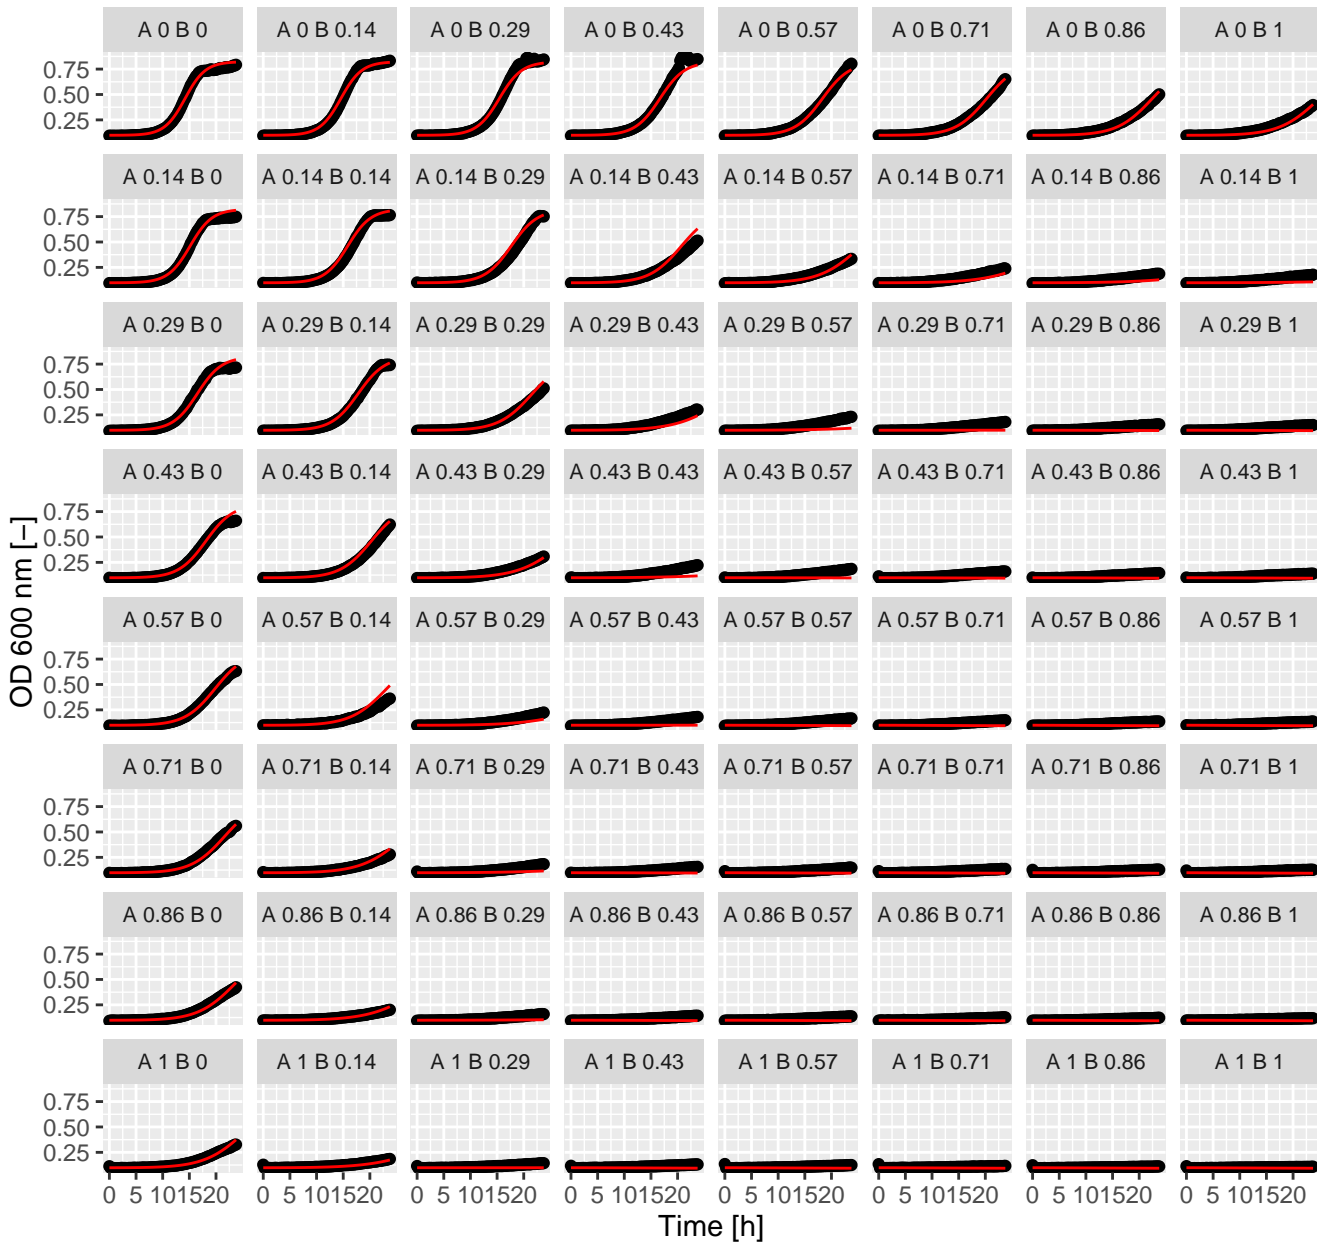

# Pen.Rap (= Ax.Bx) Emp. Bliss

beta = -437.82

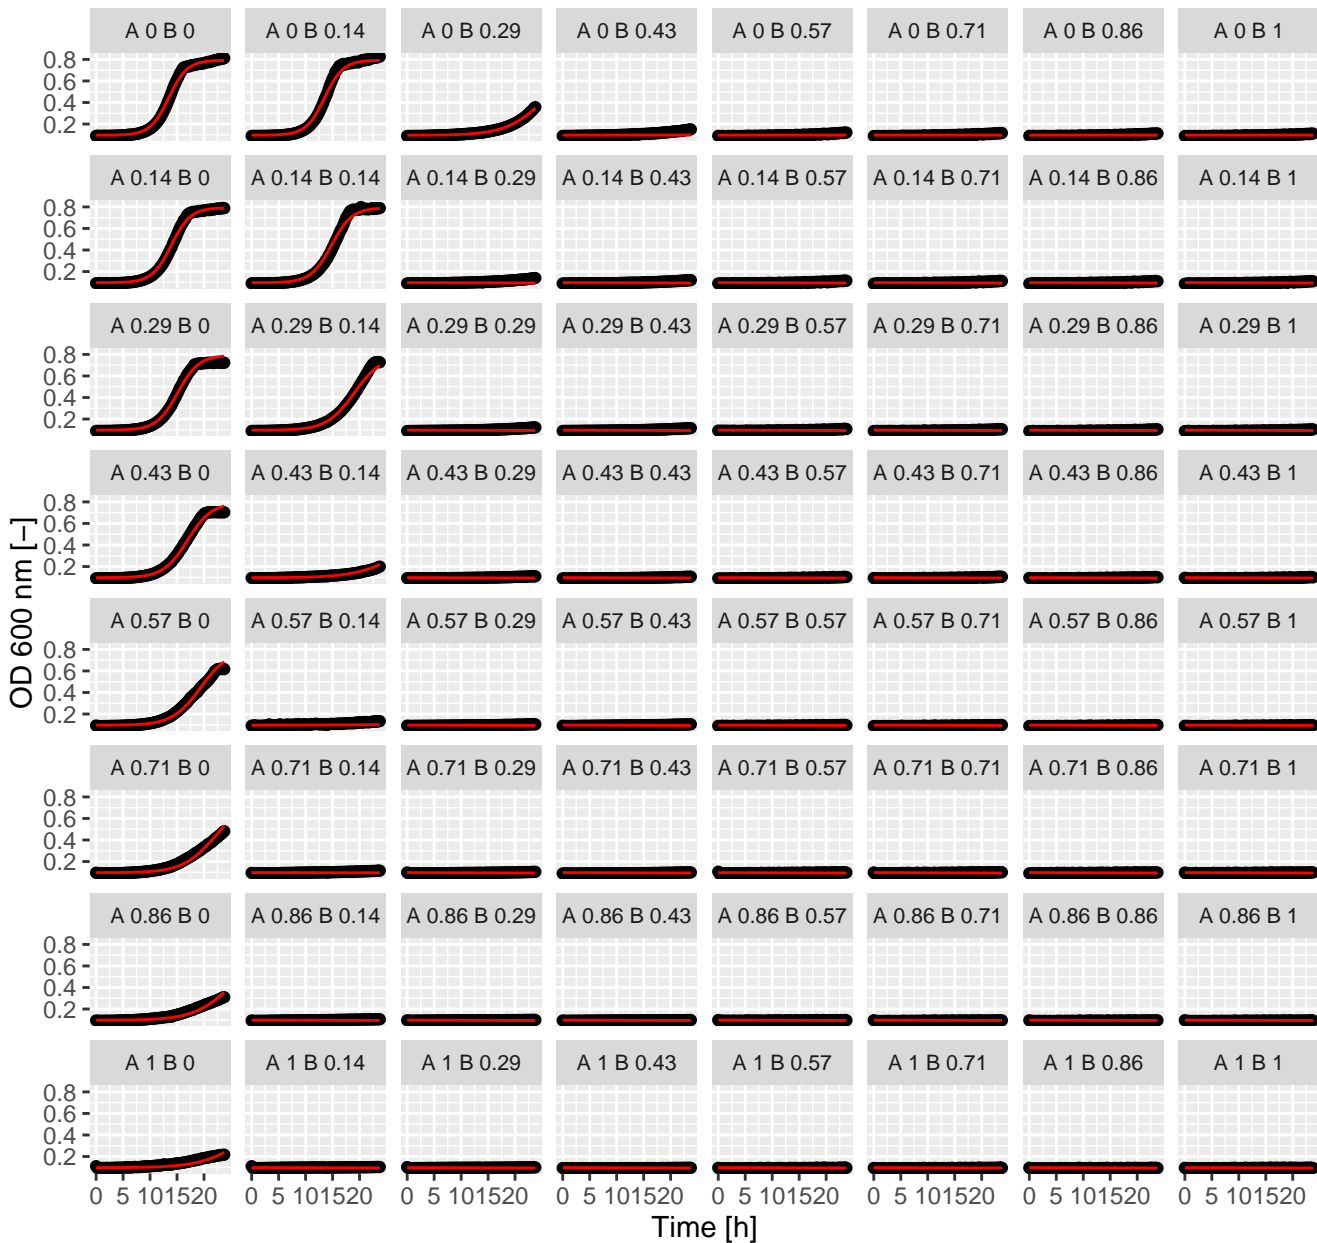

Pen.Sta (= Ax.Bx) Emp. Bliss  
beta = -25.74

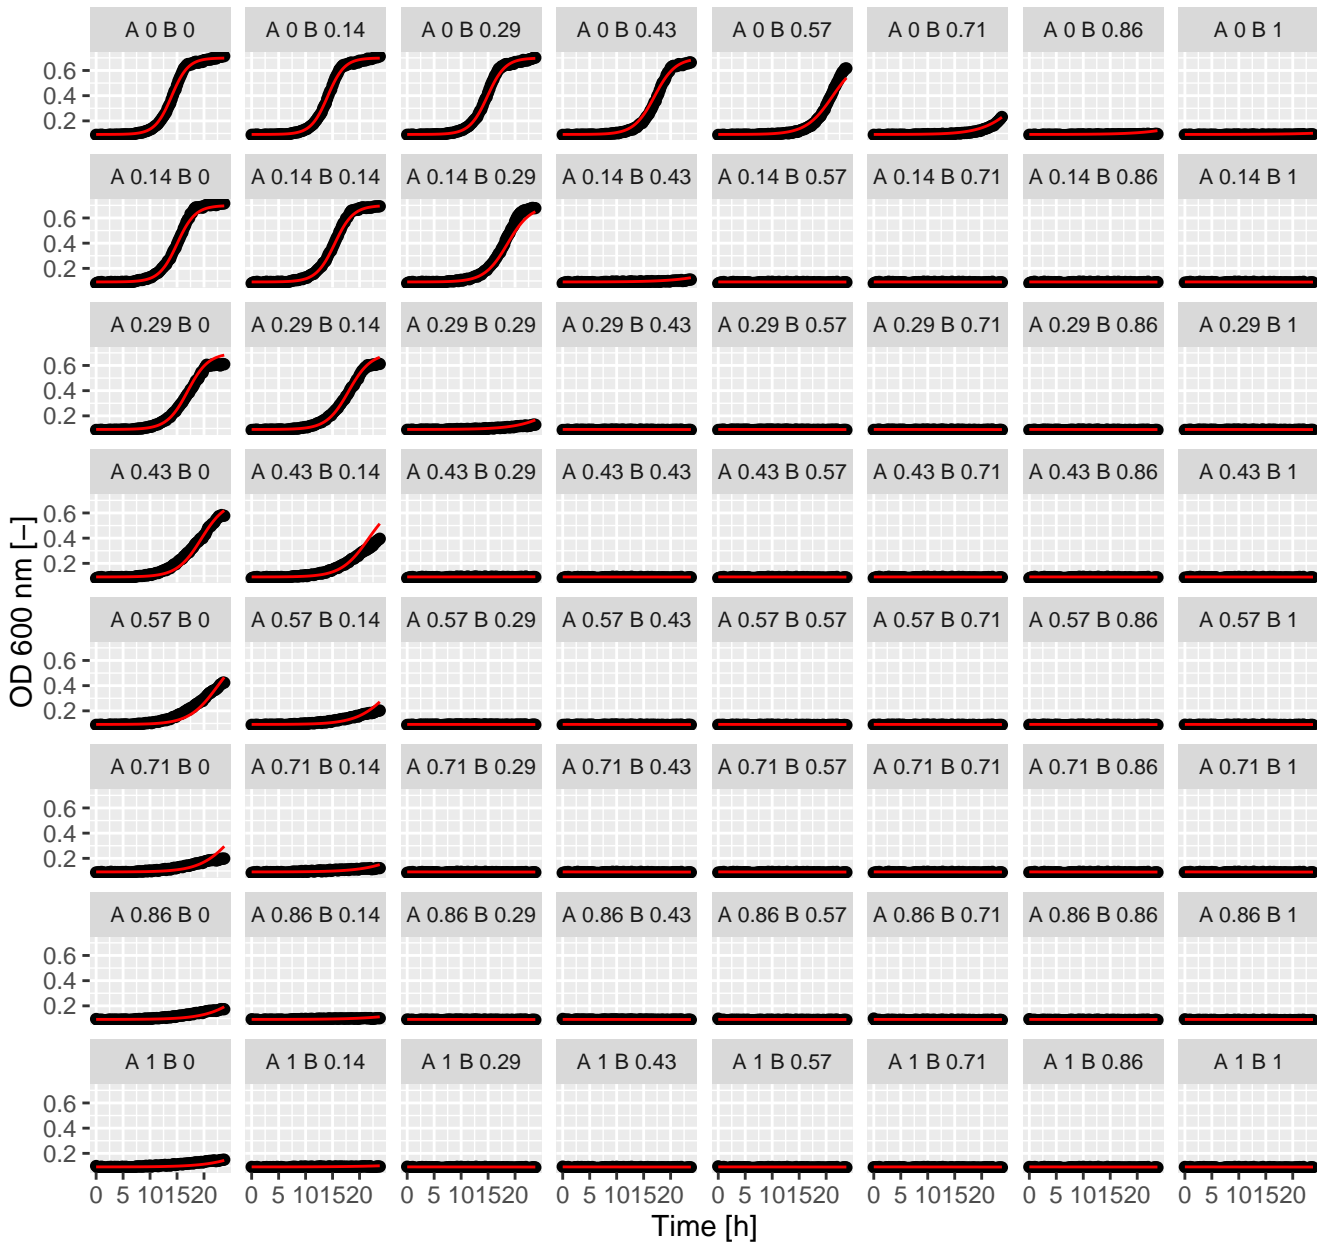



Pen.Tac (= Ax.Bx) Emp. Bliss  
beta = -6.54

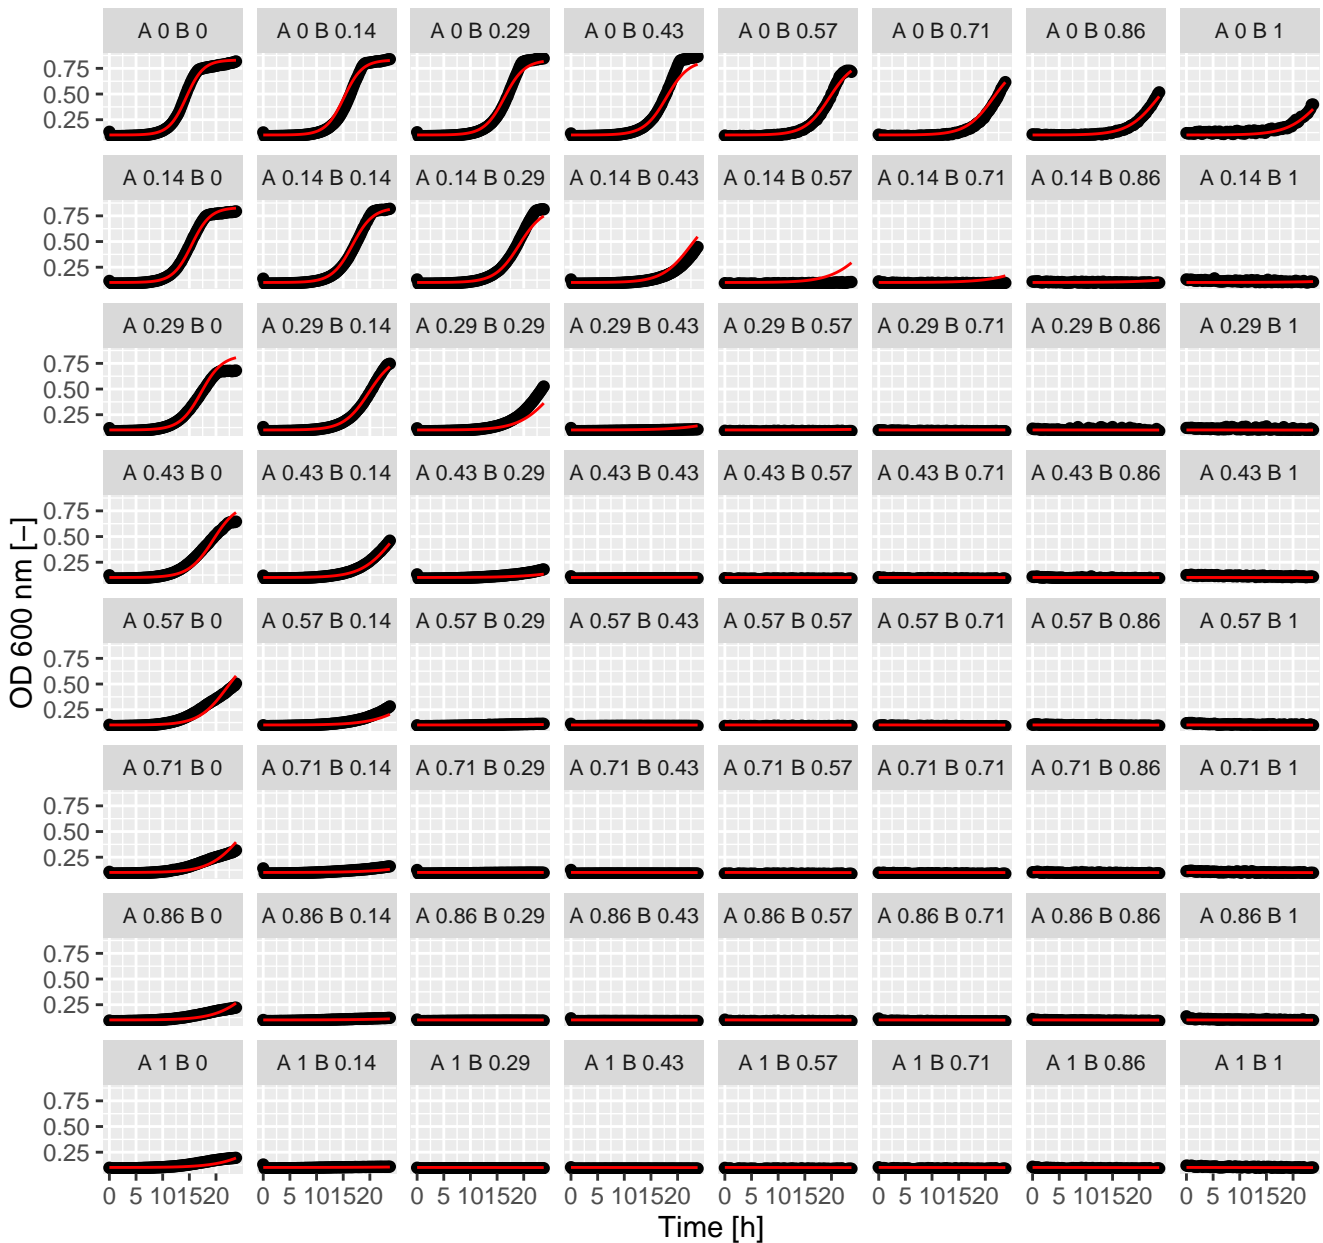

Pen.Ter (= Ax.Bx) Emp. Bliss  
beta = -0.16

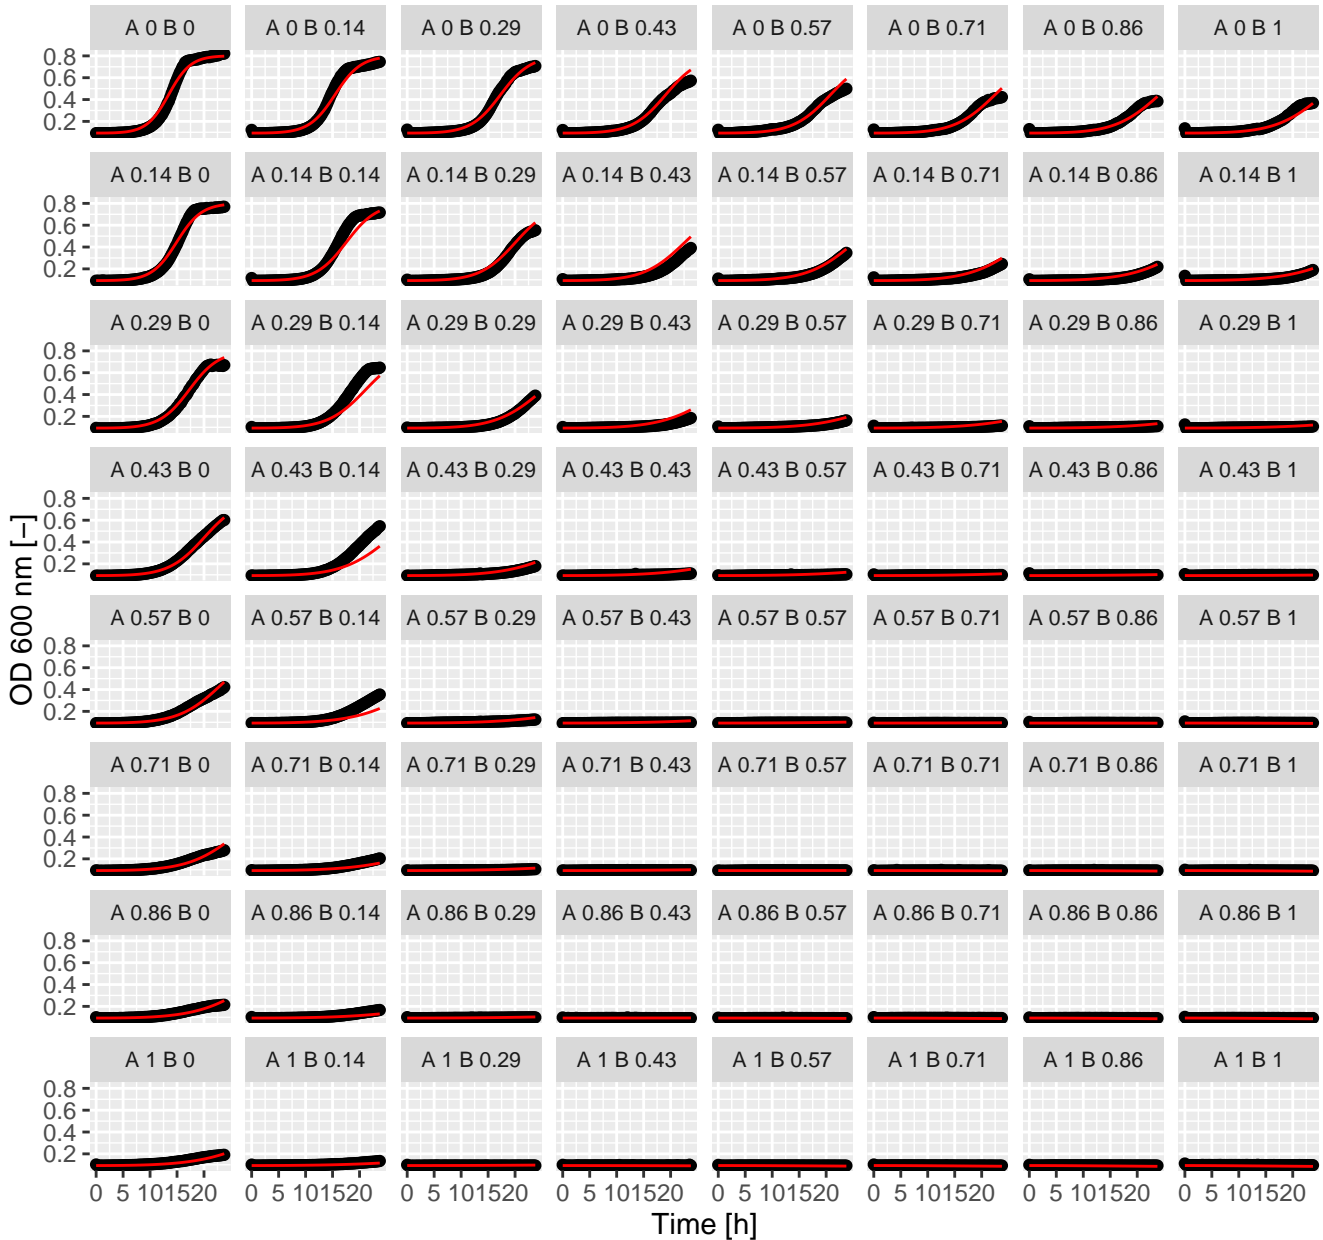

Pen.Tun (= Ax.Bx) Emp. Bliss  
beta = -1.12

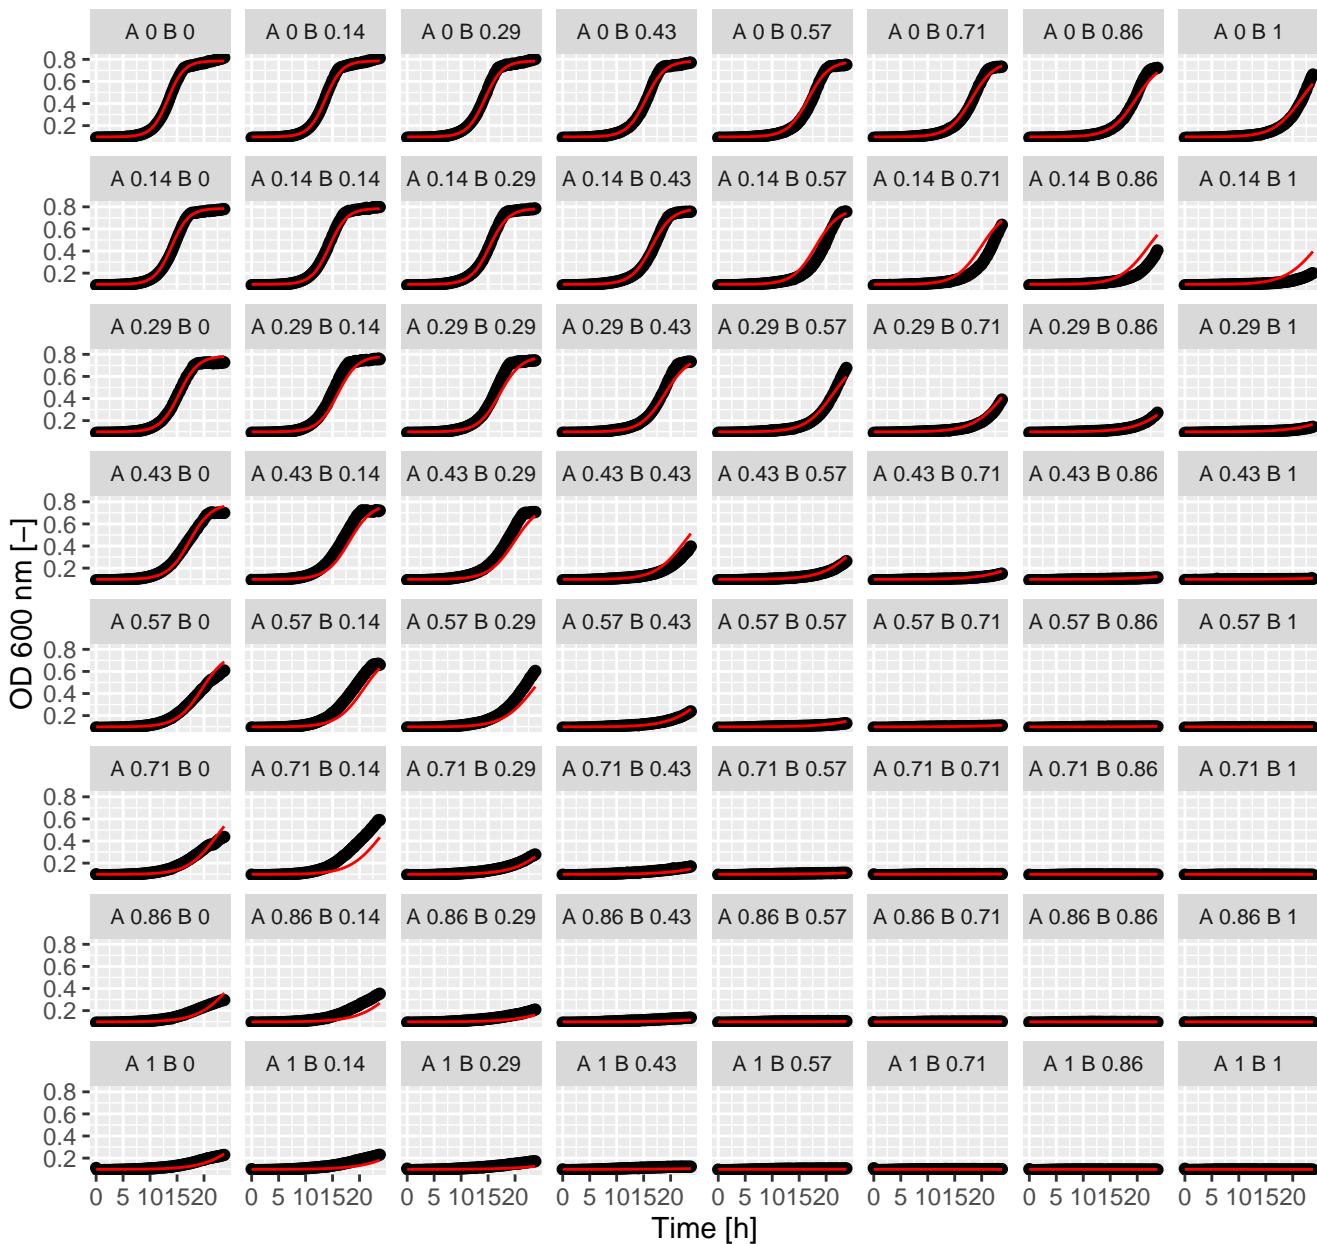

Qmy.Qmy (= Ax.Bx) Emp. Bliss  
beta = -42.16

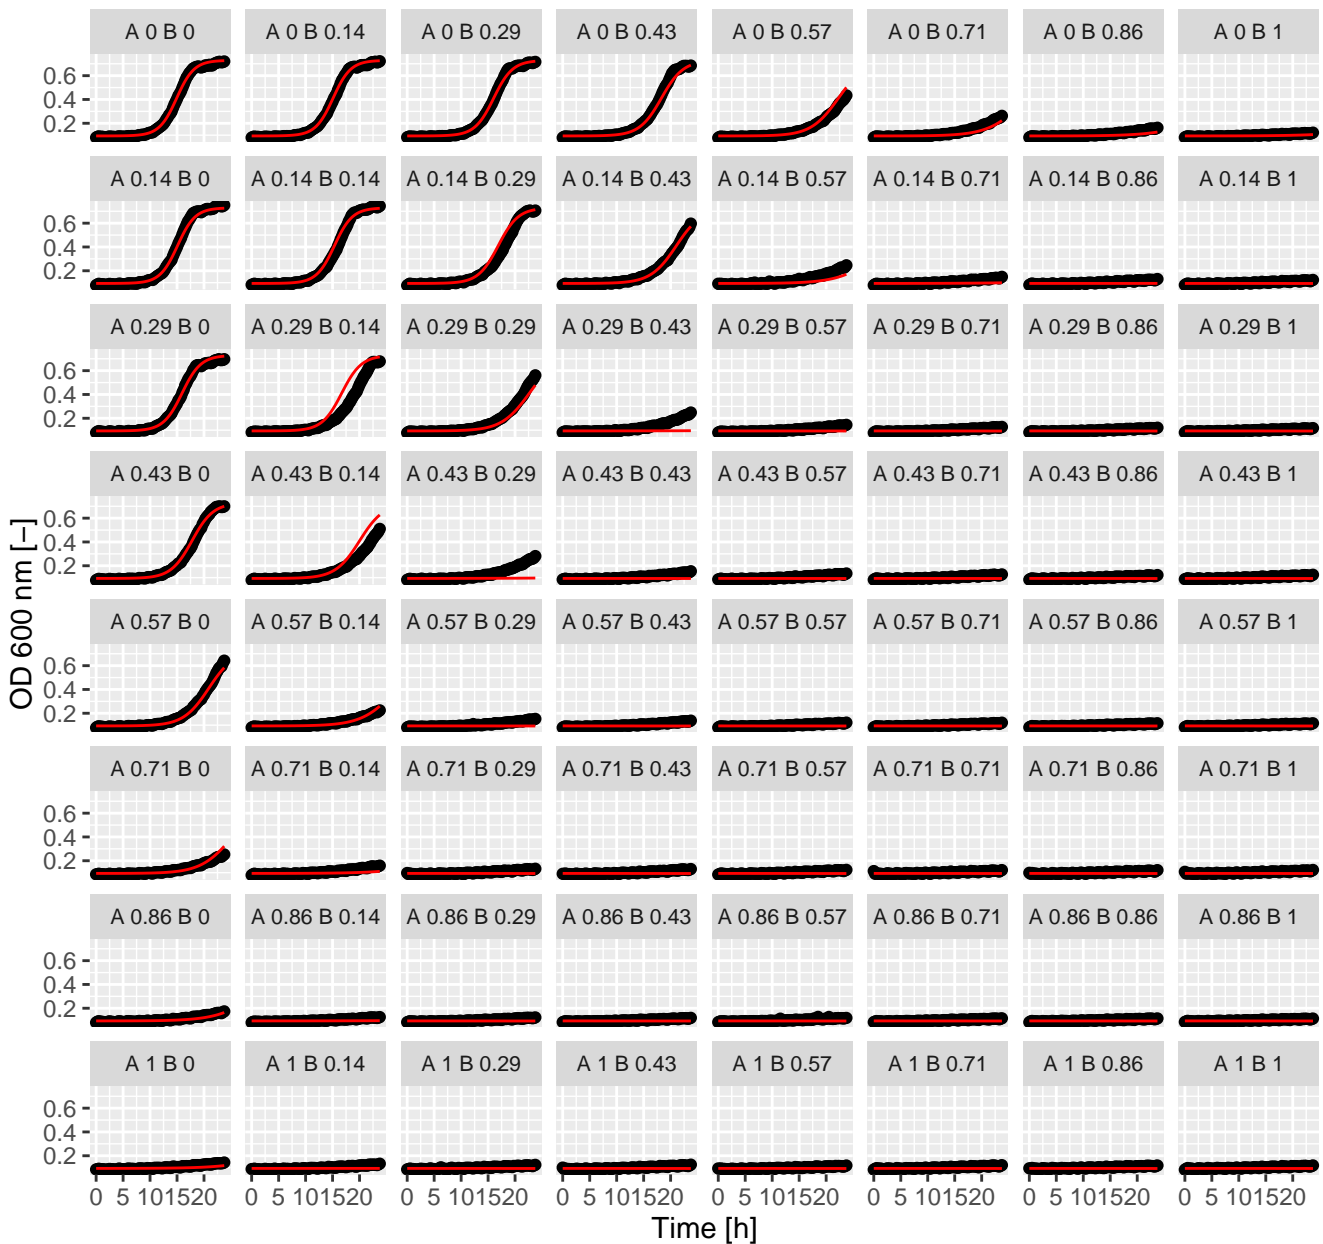

Qmy.Sta (= Ax.Bx) Emp. Bliss  
beta = 1.7

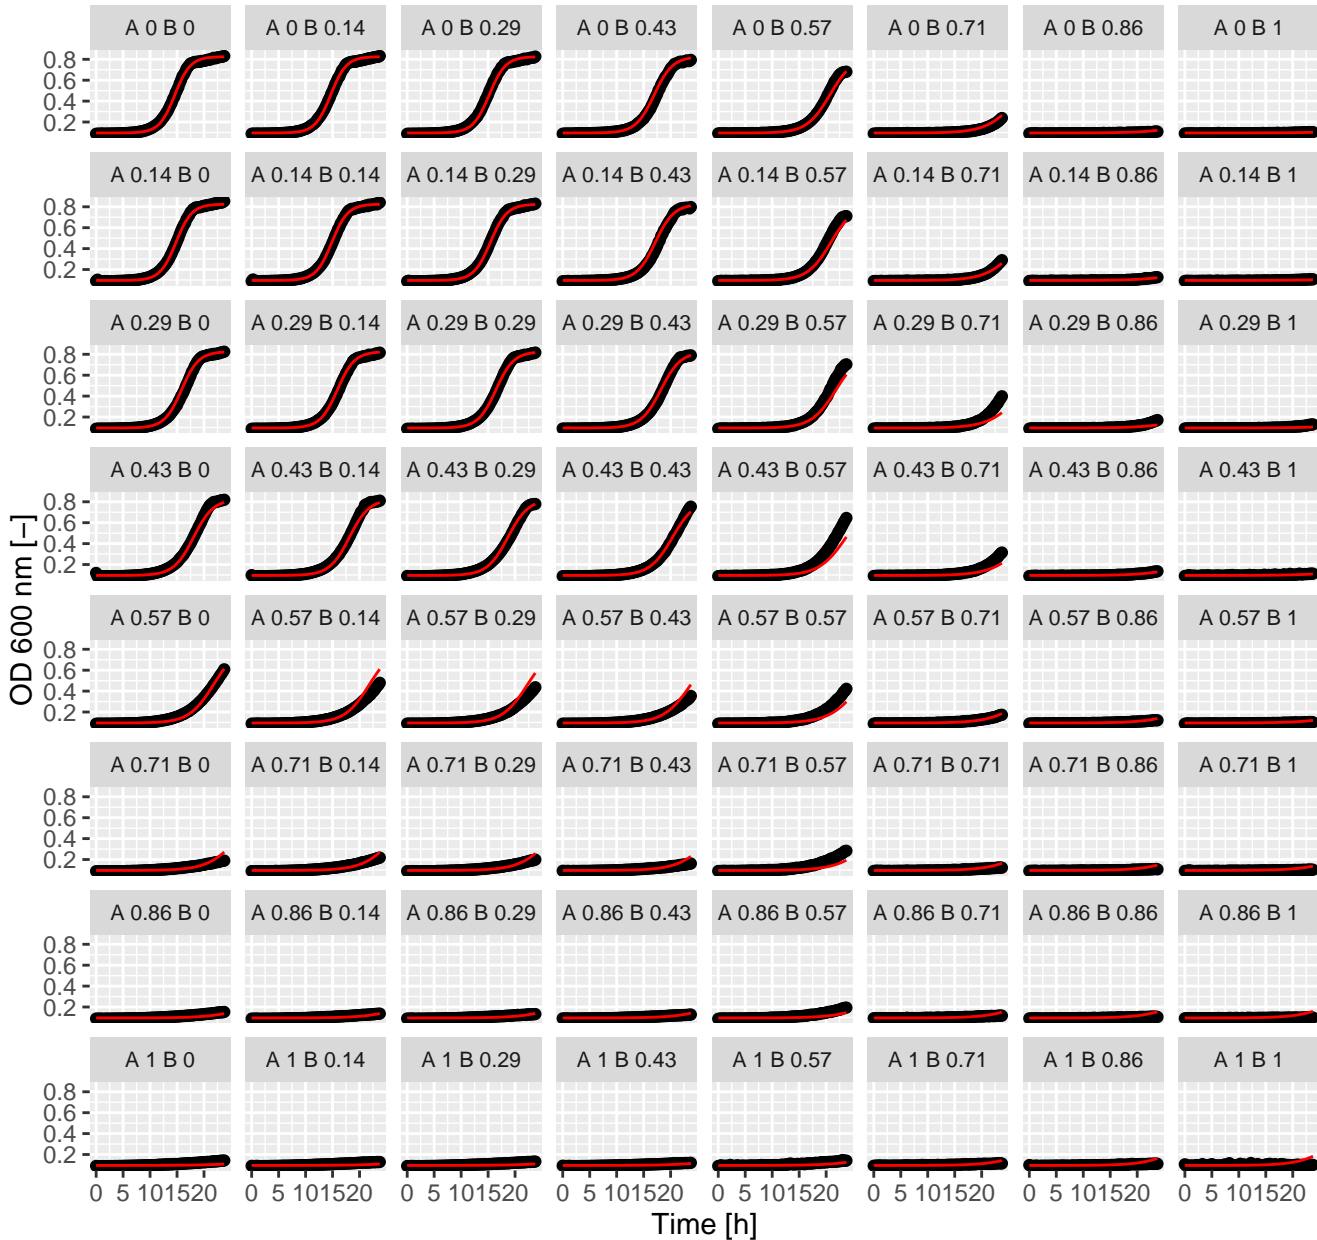

Qmy.Tac (= Ax.Bx) Emp. Bliss  
beta = -4.34

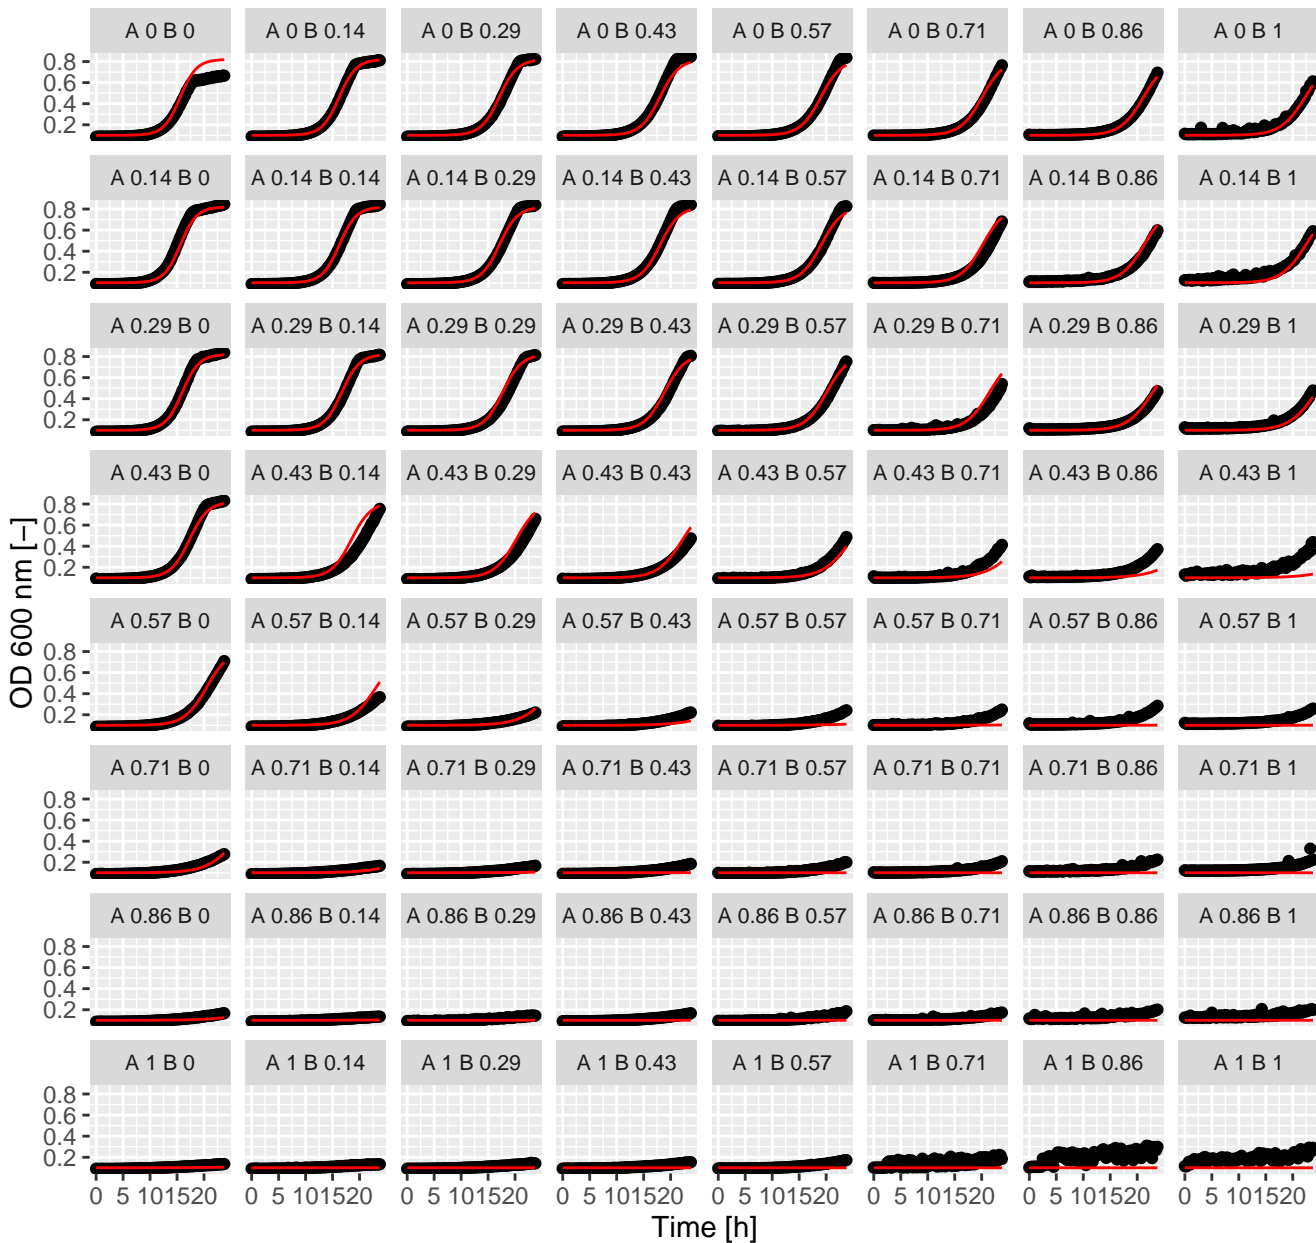

Qmy.Ter (= Ax.Bx) Emp. Bliss

beta = -67.34

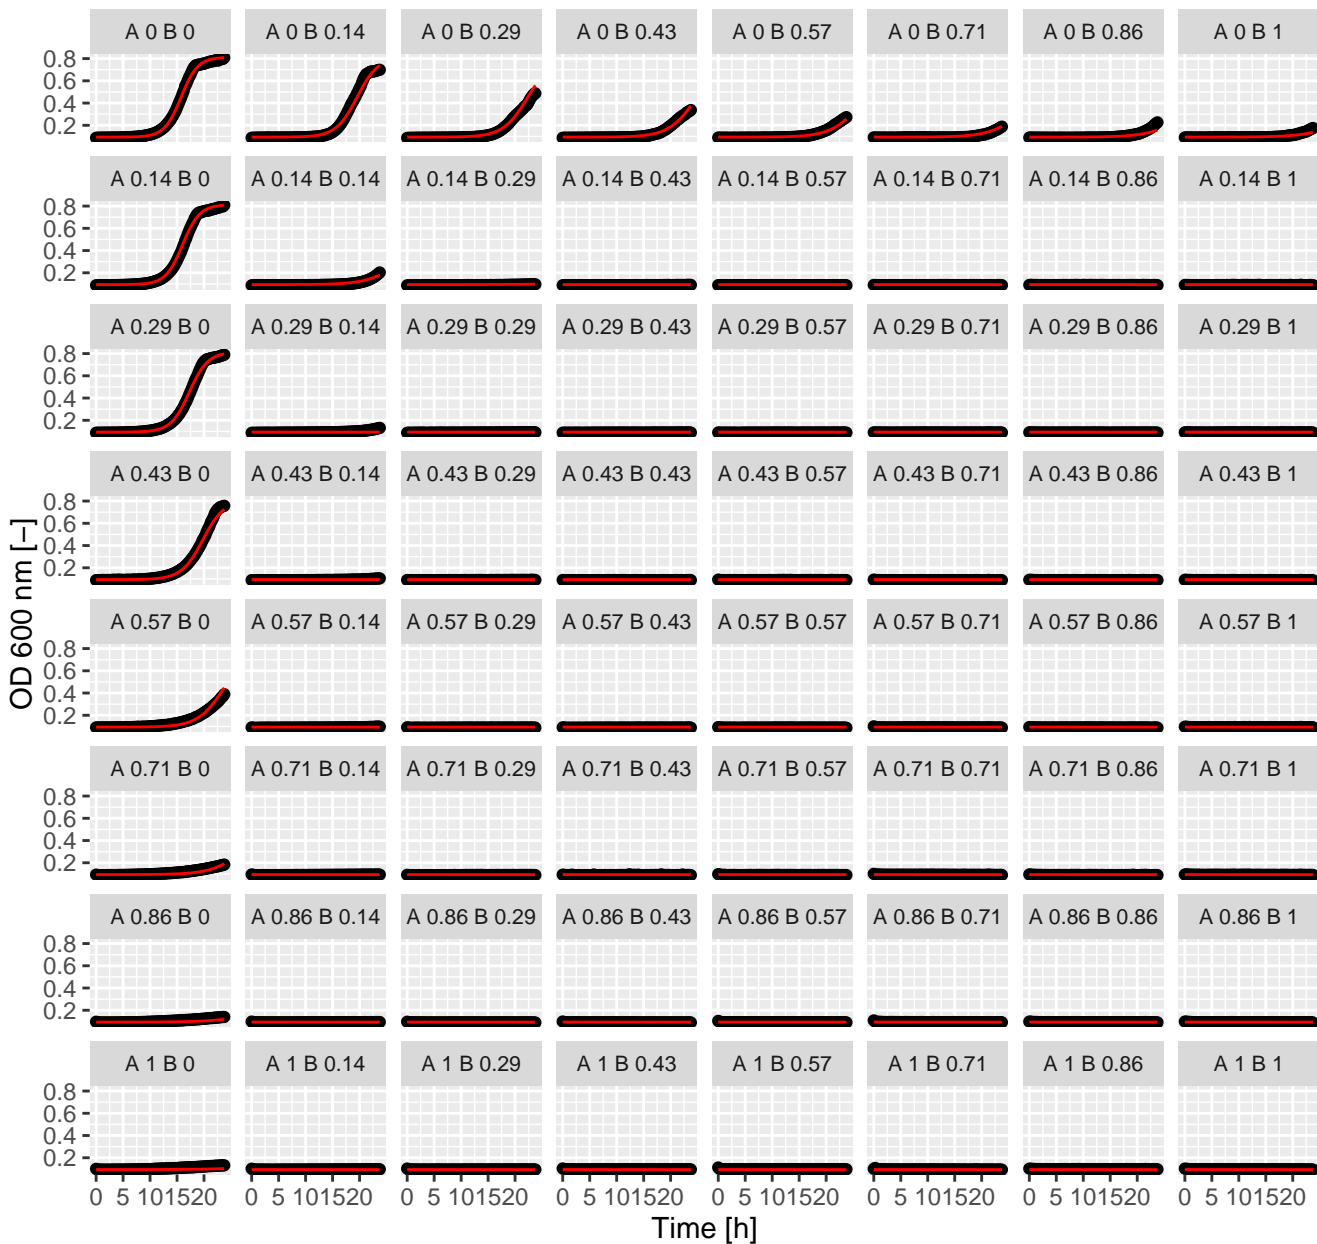

Qnn.Rad (= Ax.Bx) Emp. Bliss  
beta = -21.98

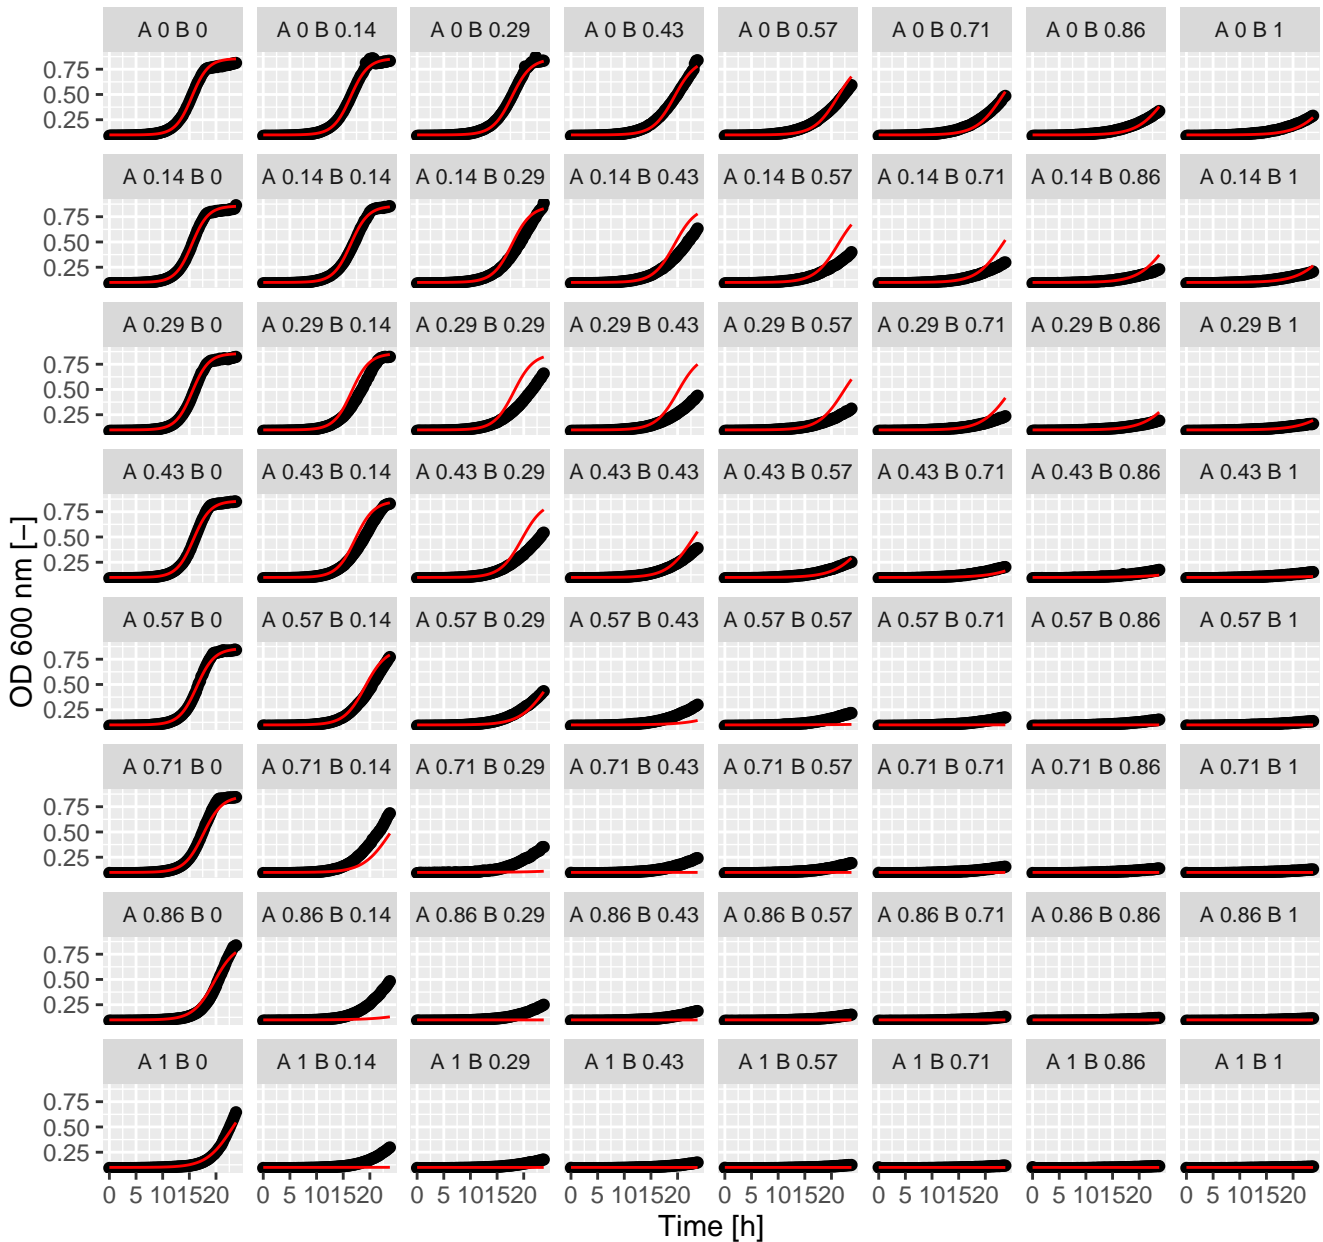



Rad.Rap (= Ax.Bx) Emp. Bliss  
beta = -39040.4

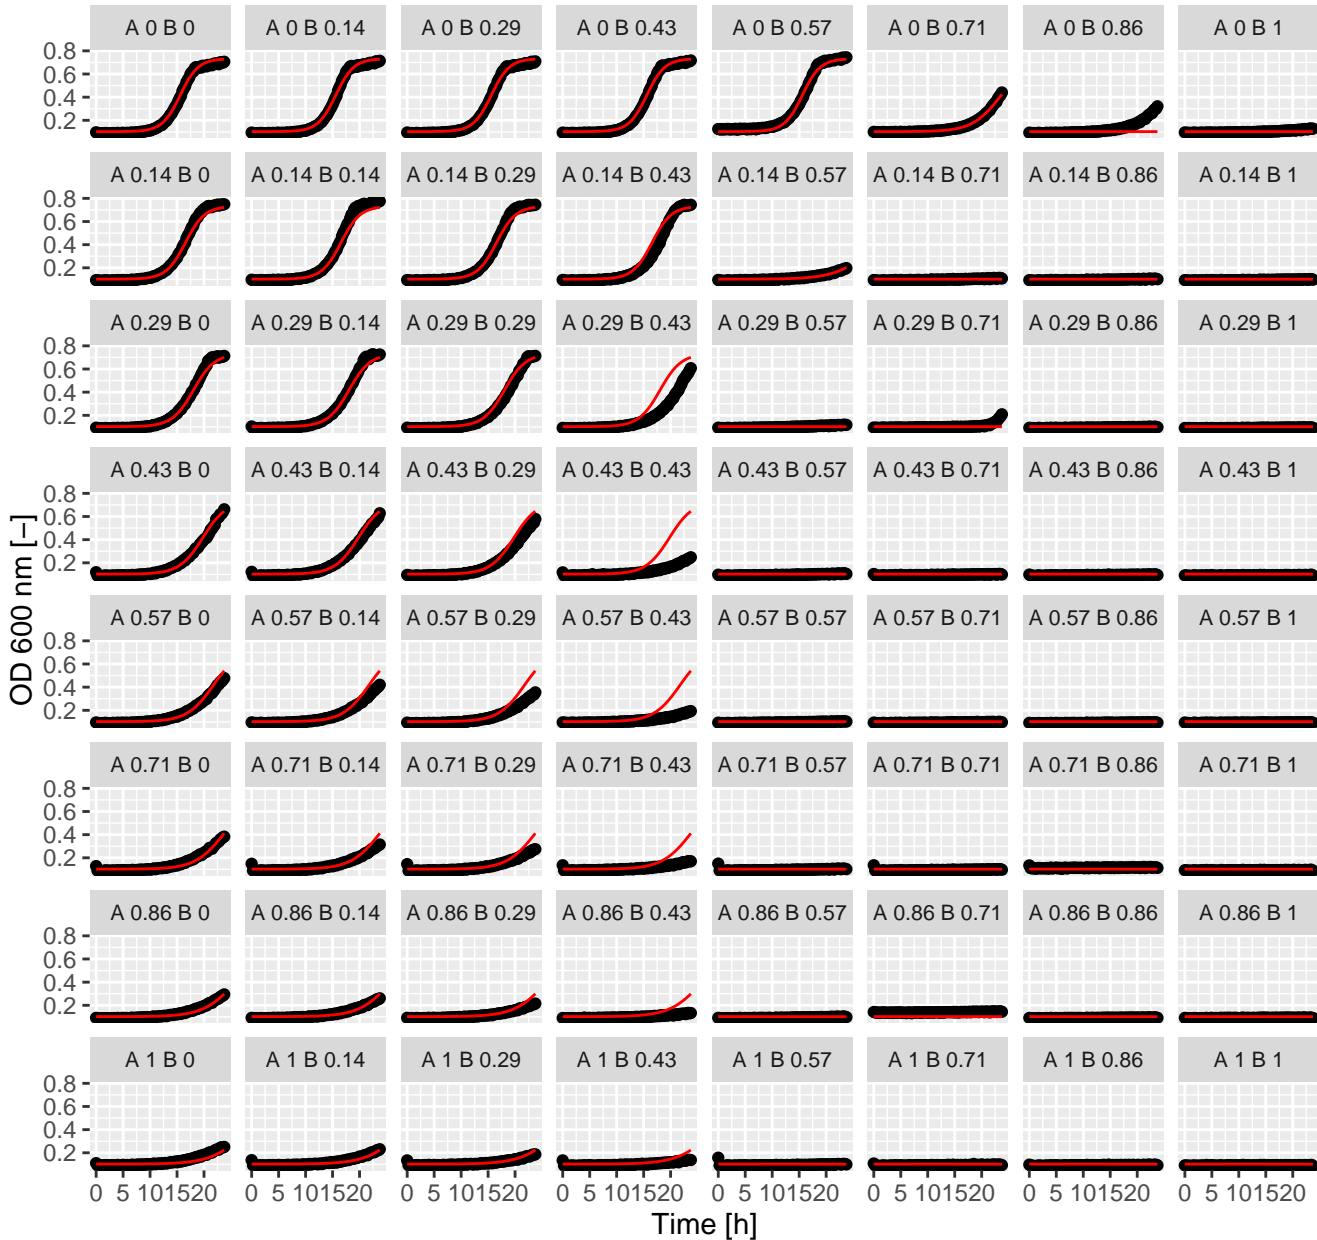

Rad.Sta (= Ax.Bx) Emp. Bliss  
beta = 1.84

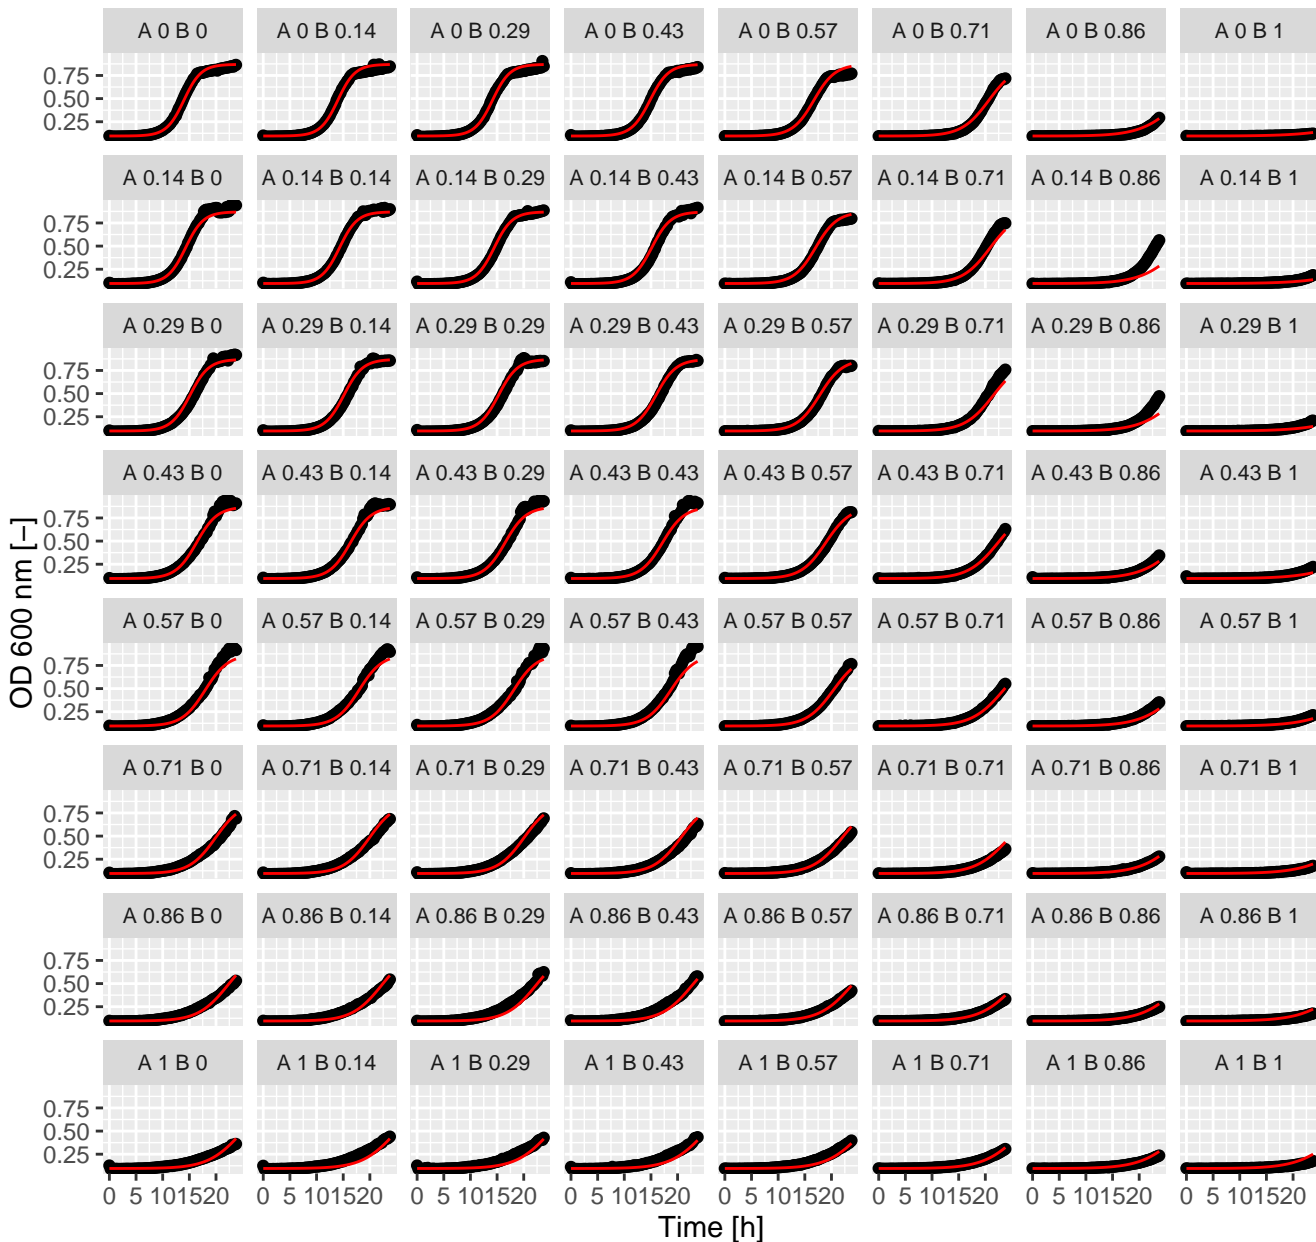

Rad.Tac (= Ax.Bx) Emp. Bliss  
beta = -11.61

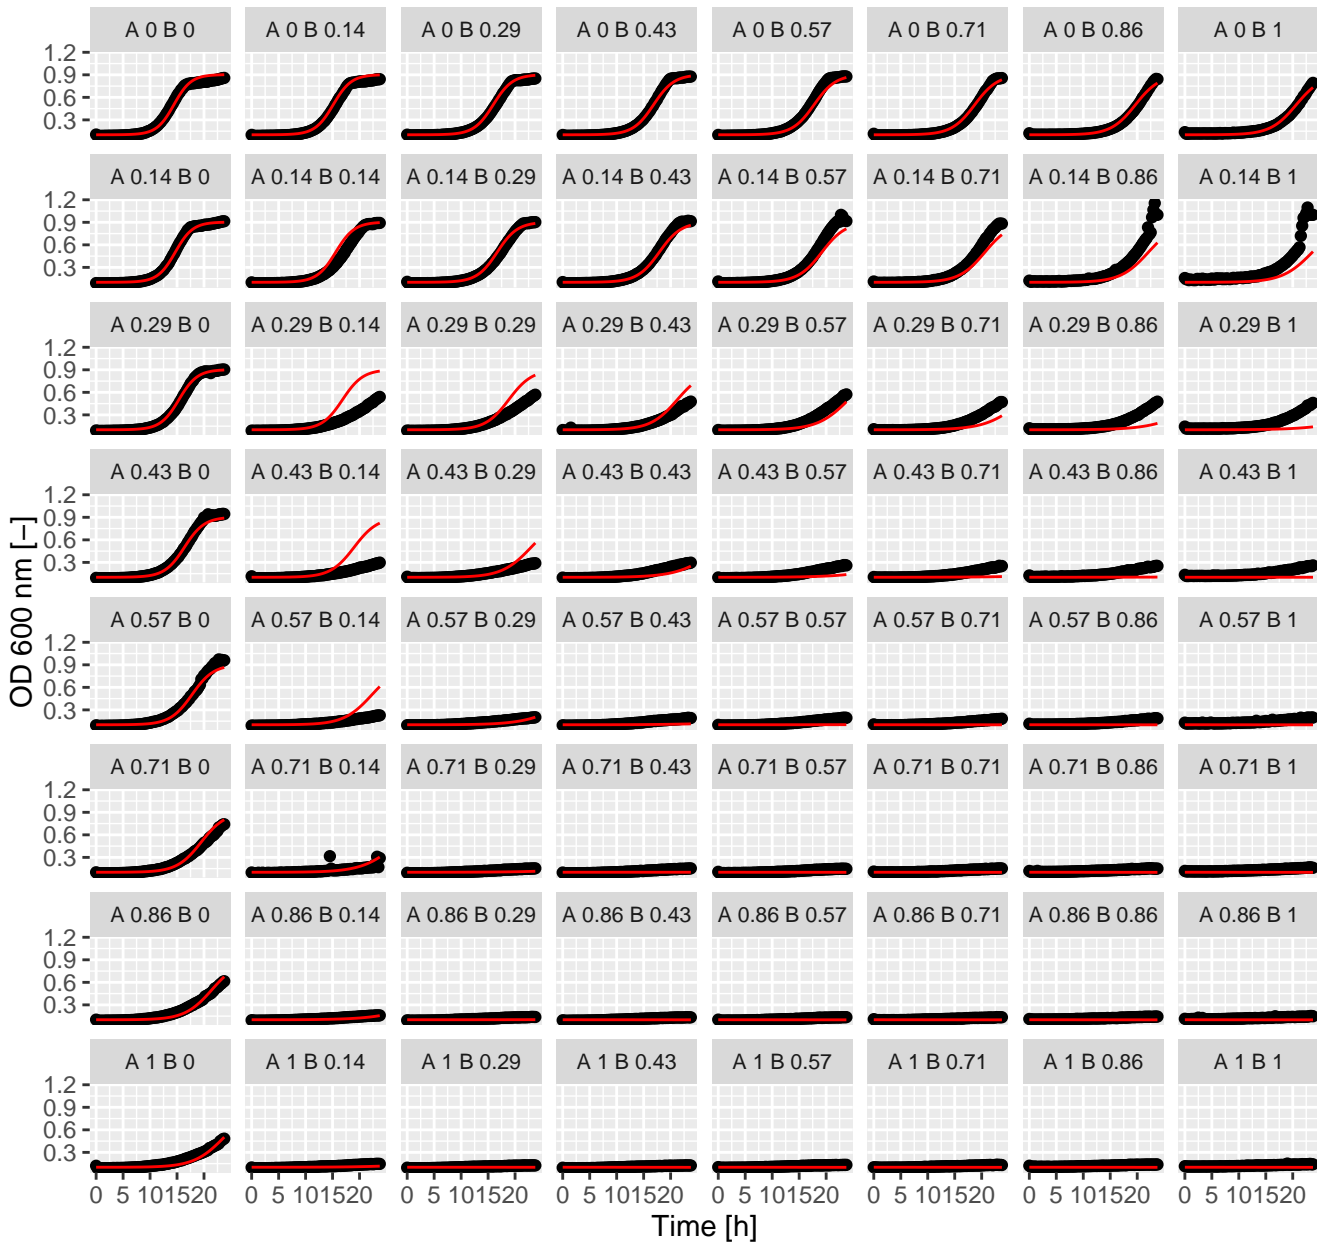

Rad.Ter (= Ax.Bx) Emp. Bliss  
beta = -1.77

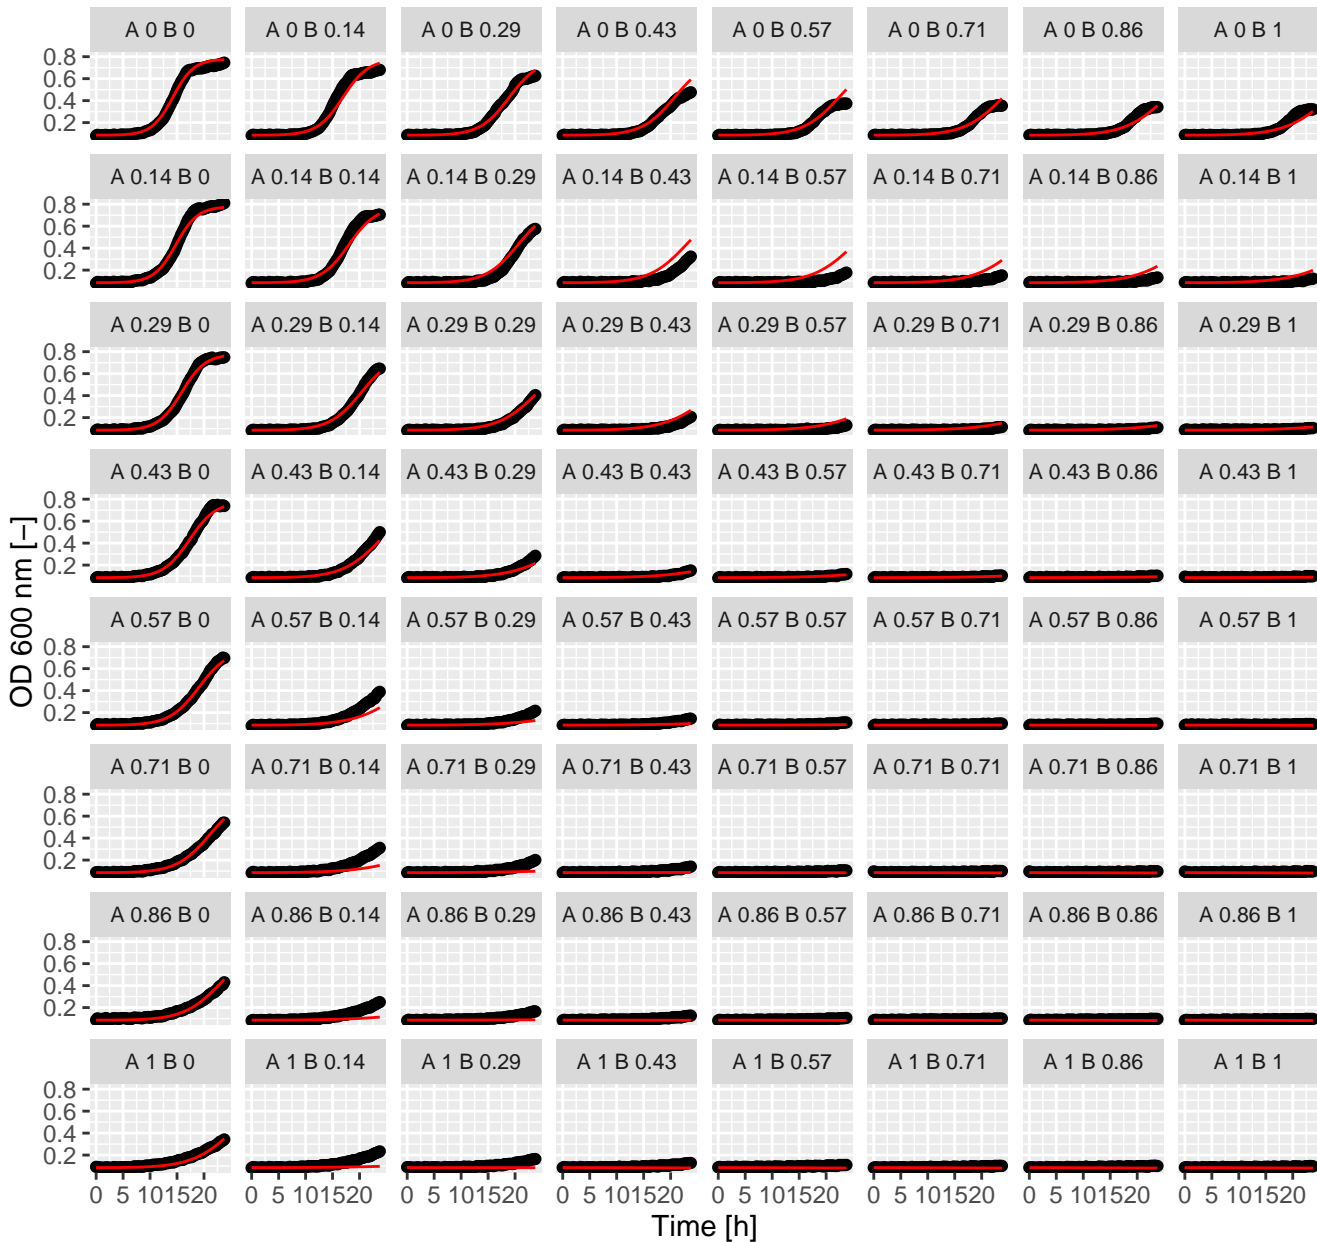

# Rap.Rap (= Ax.Bx) Emp. Bliss

beta = -34611.6

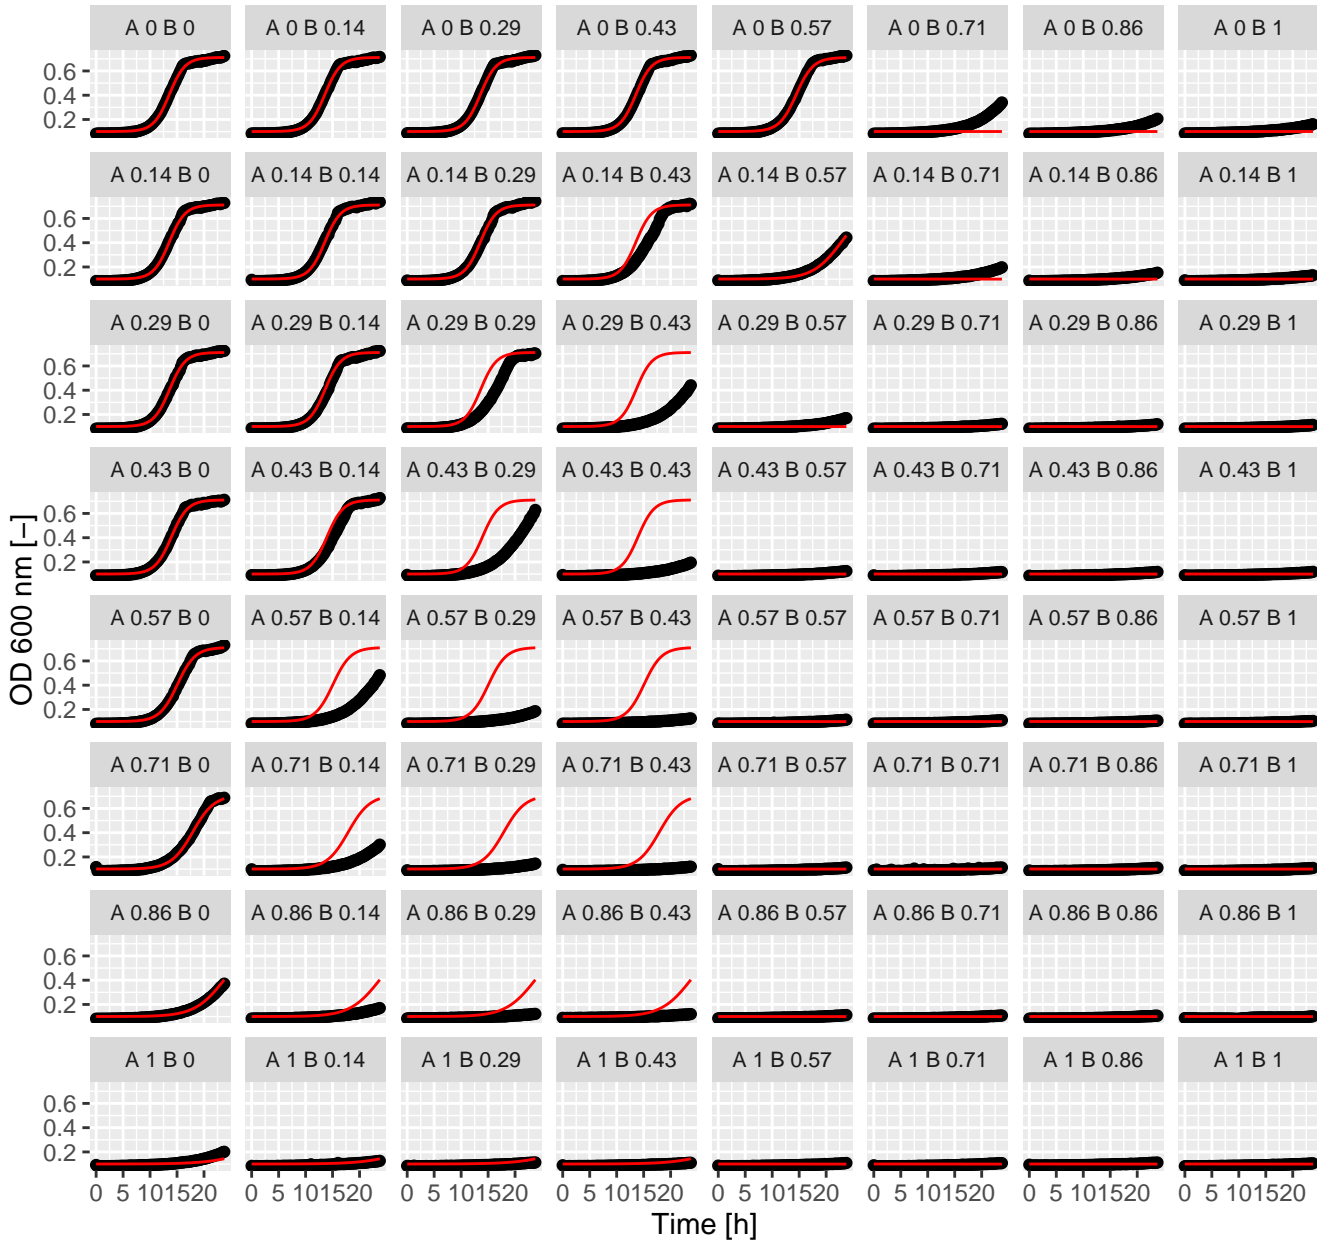

Rap.Sta (= Ax.Bx) Emp. Bliss  
beta = -19.43

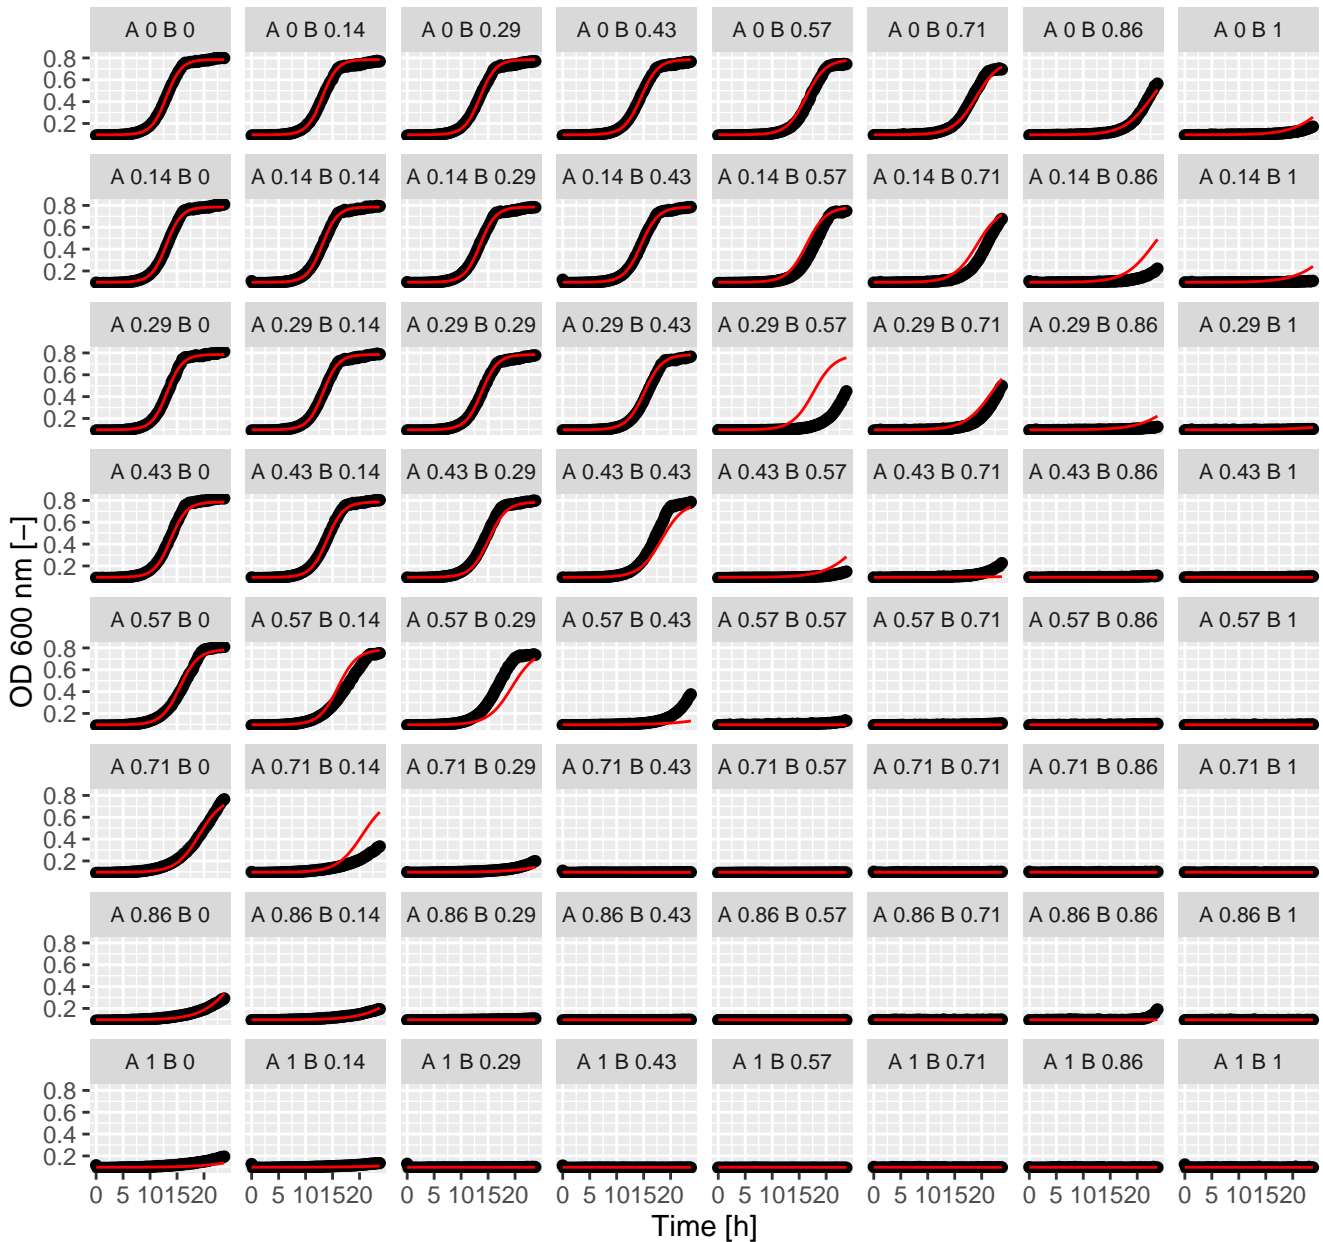

Rap.Tac (= Ax.Bx) Emp. Bliss  
beta = 2.32

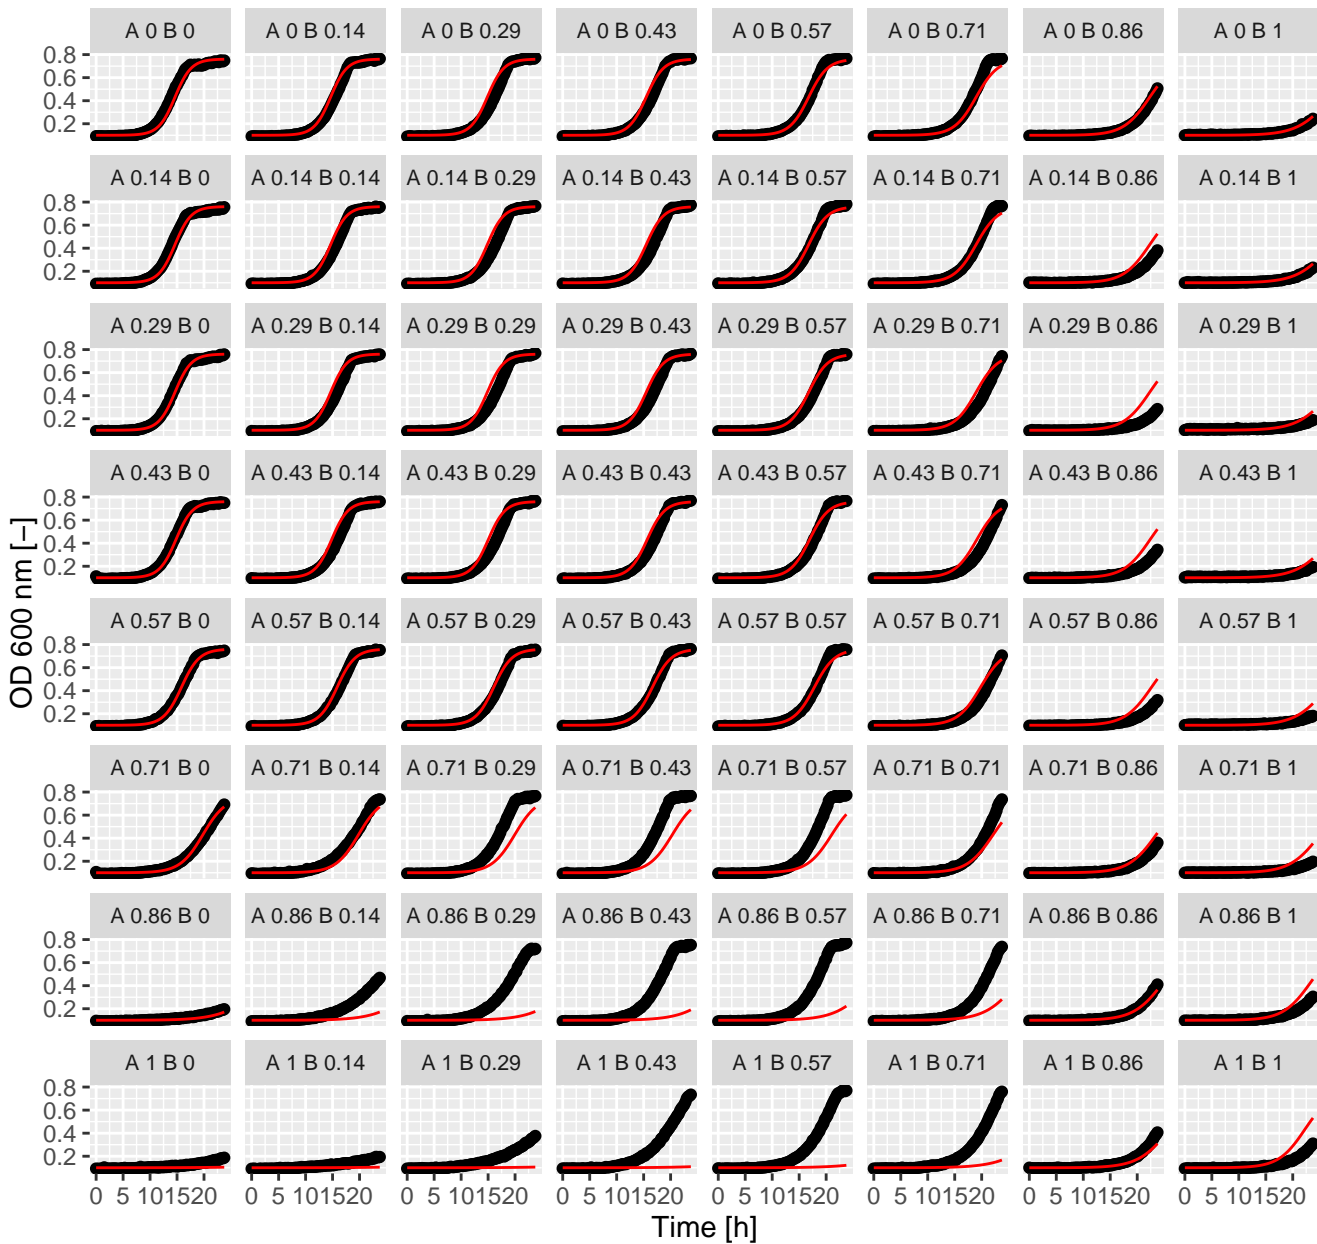

Rap.Ter (= Ax.Bx) Emp. Bliss  
beta = -1.52

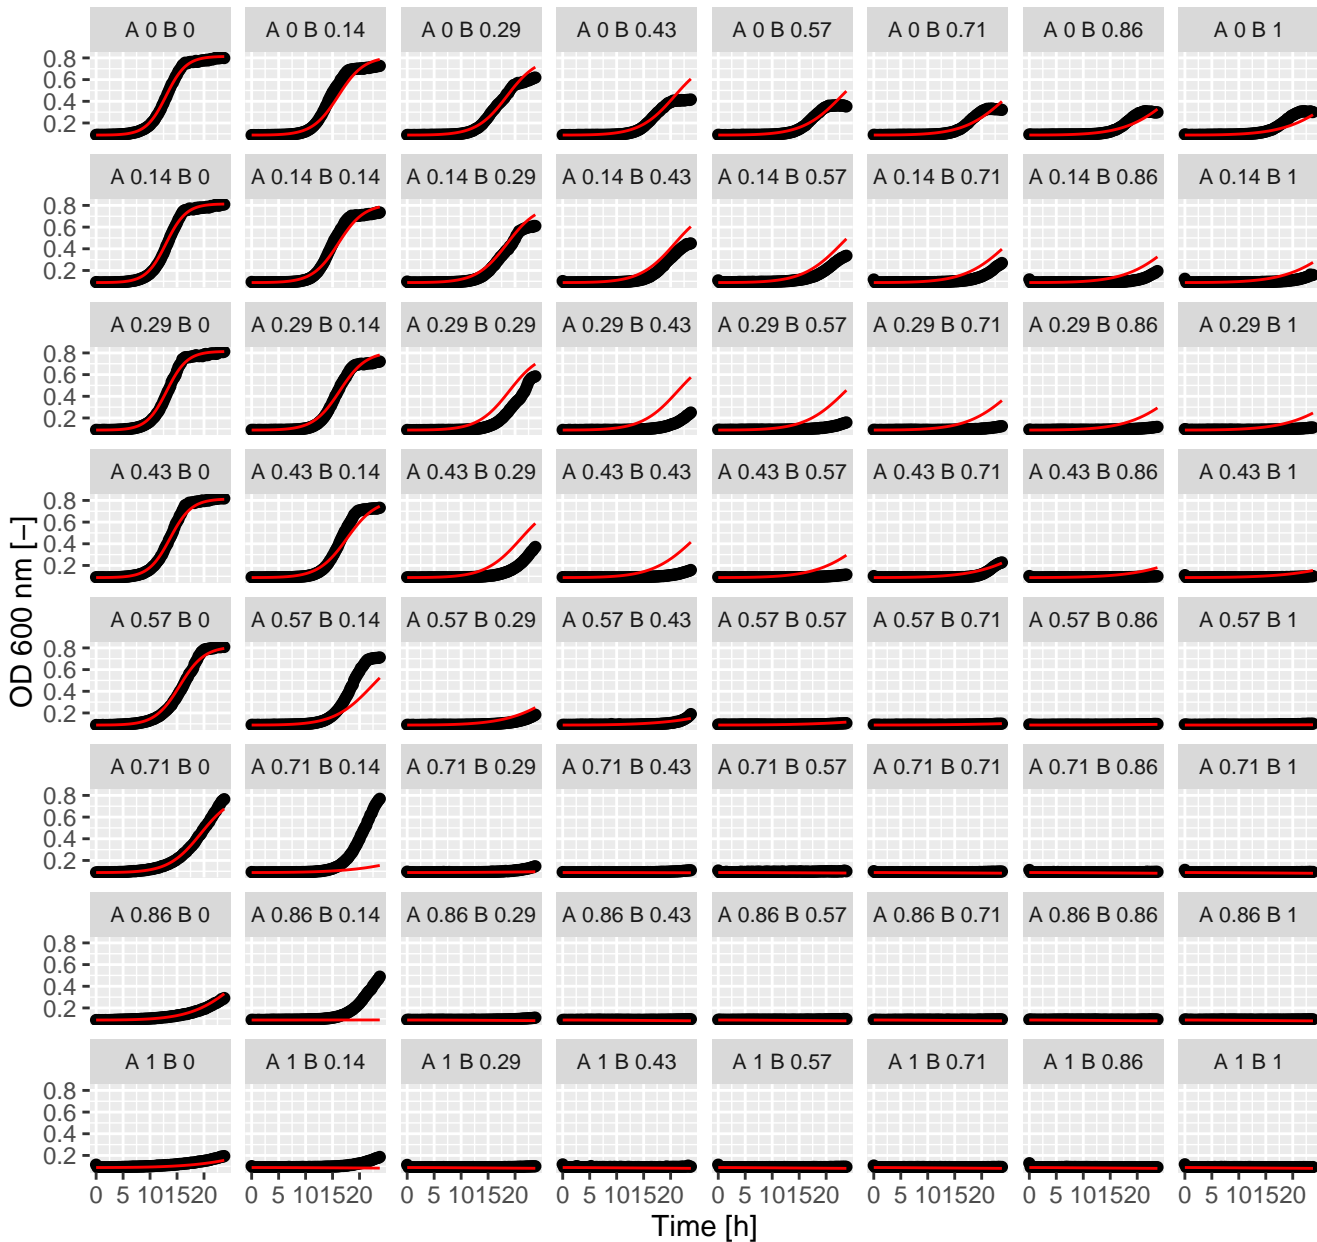



Rap.Tun (= Ax.Bx) Emp. Bliss  
beta = 0.37

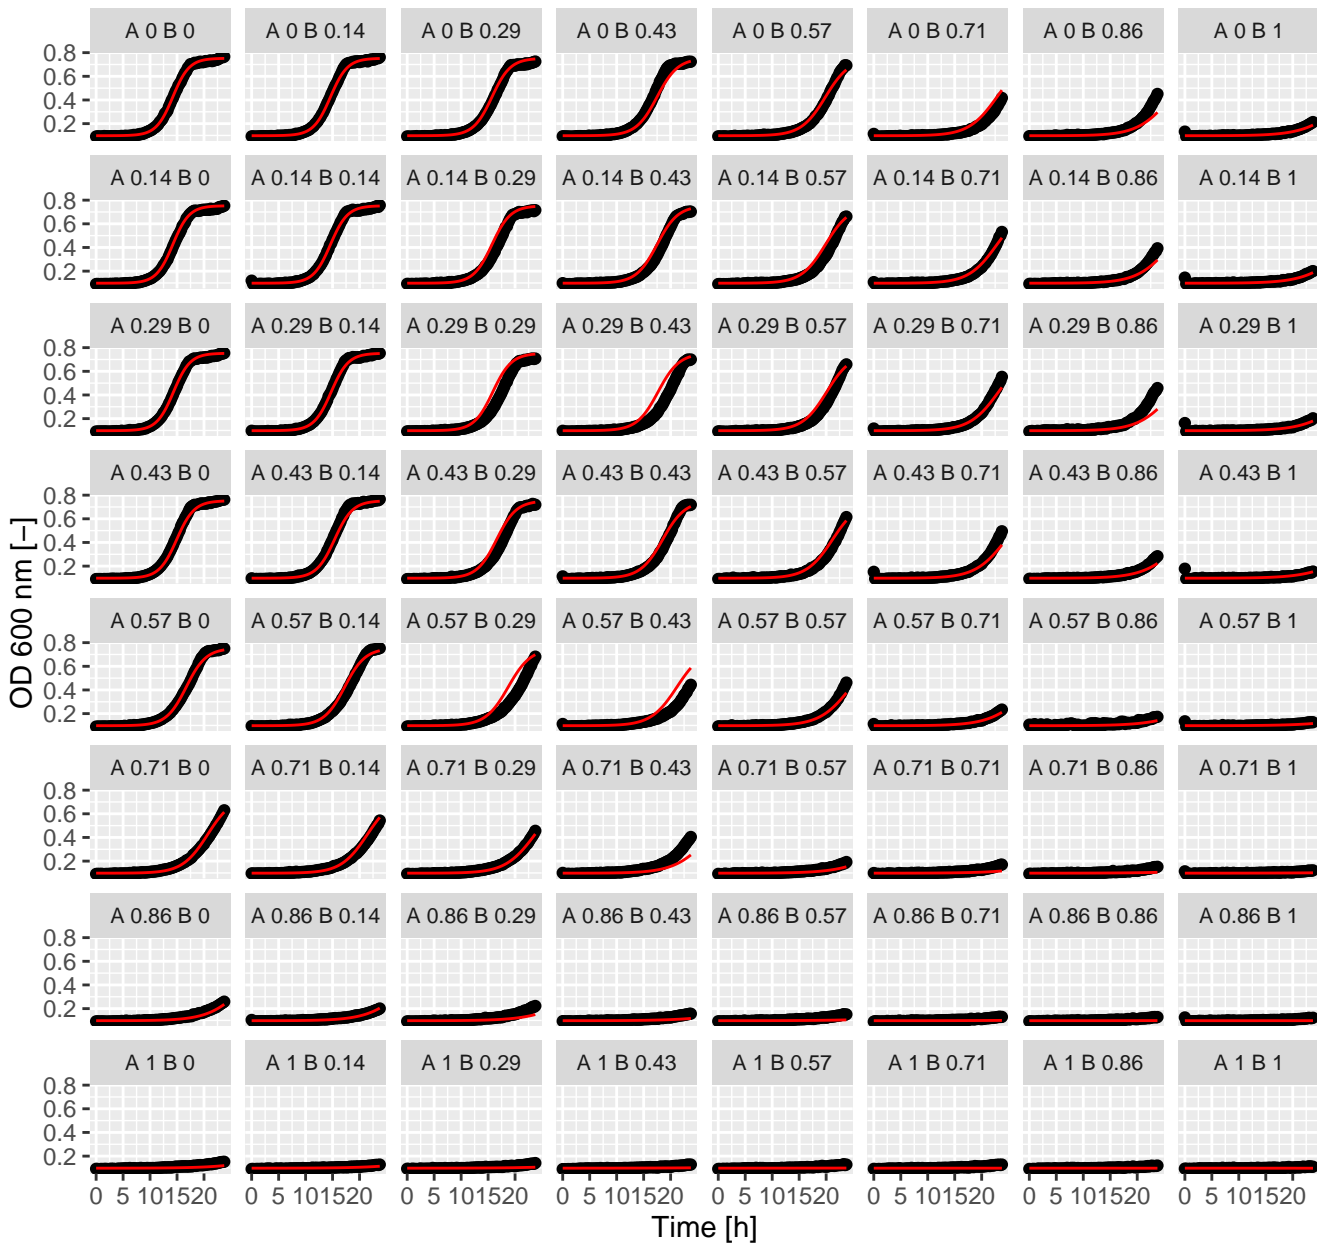

## Sta.Sta (= Ax.Bx) Emp. Bliss

beta = -195.92

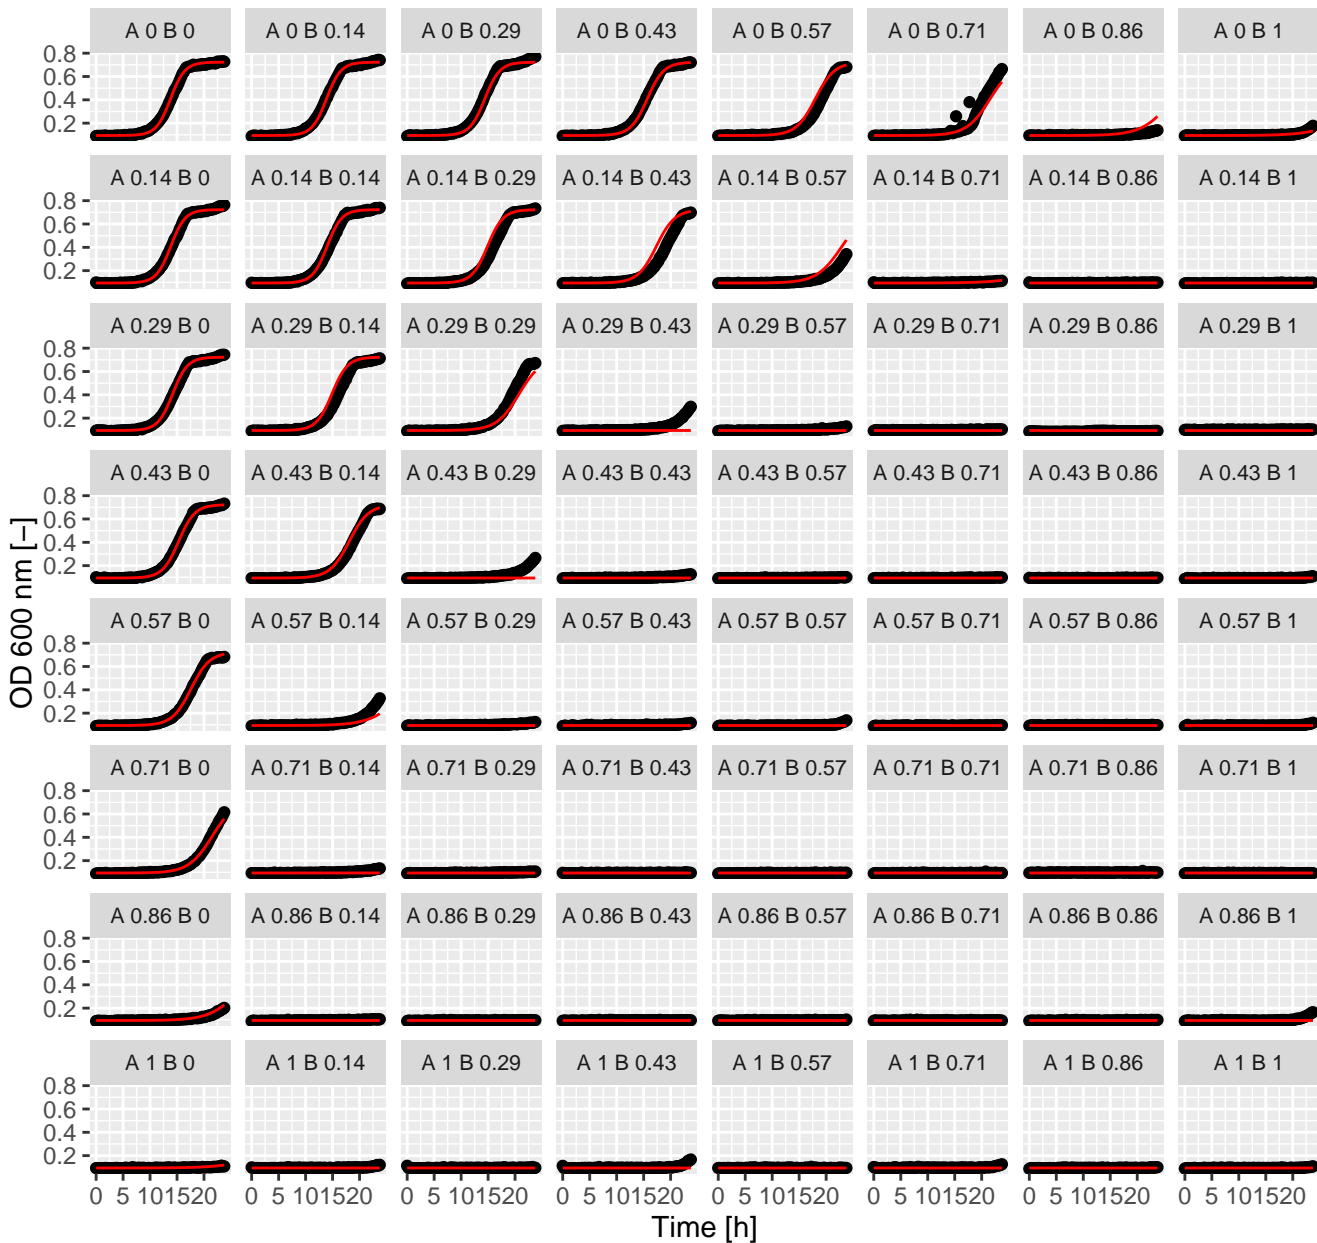

## Sta.Tac (= Ax.Bx) Emp. Bliss

beta = -1220403.6

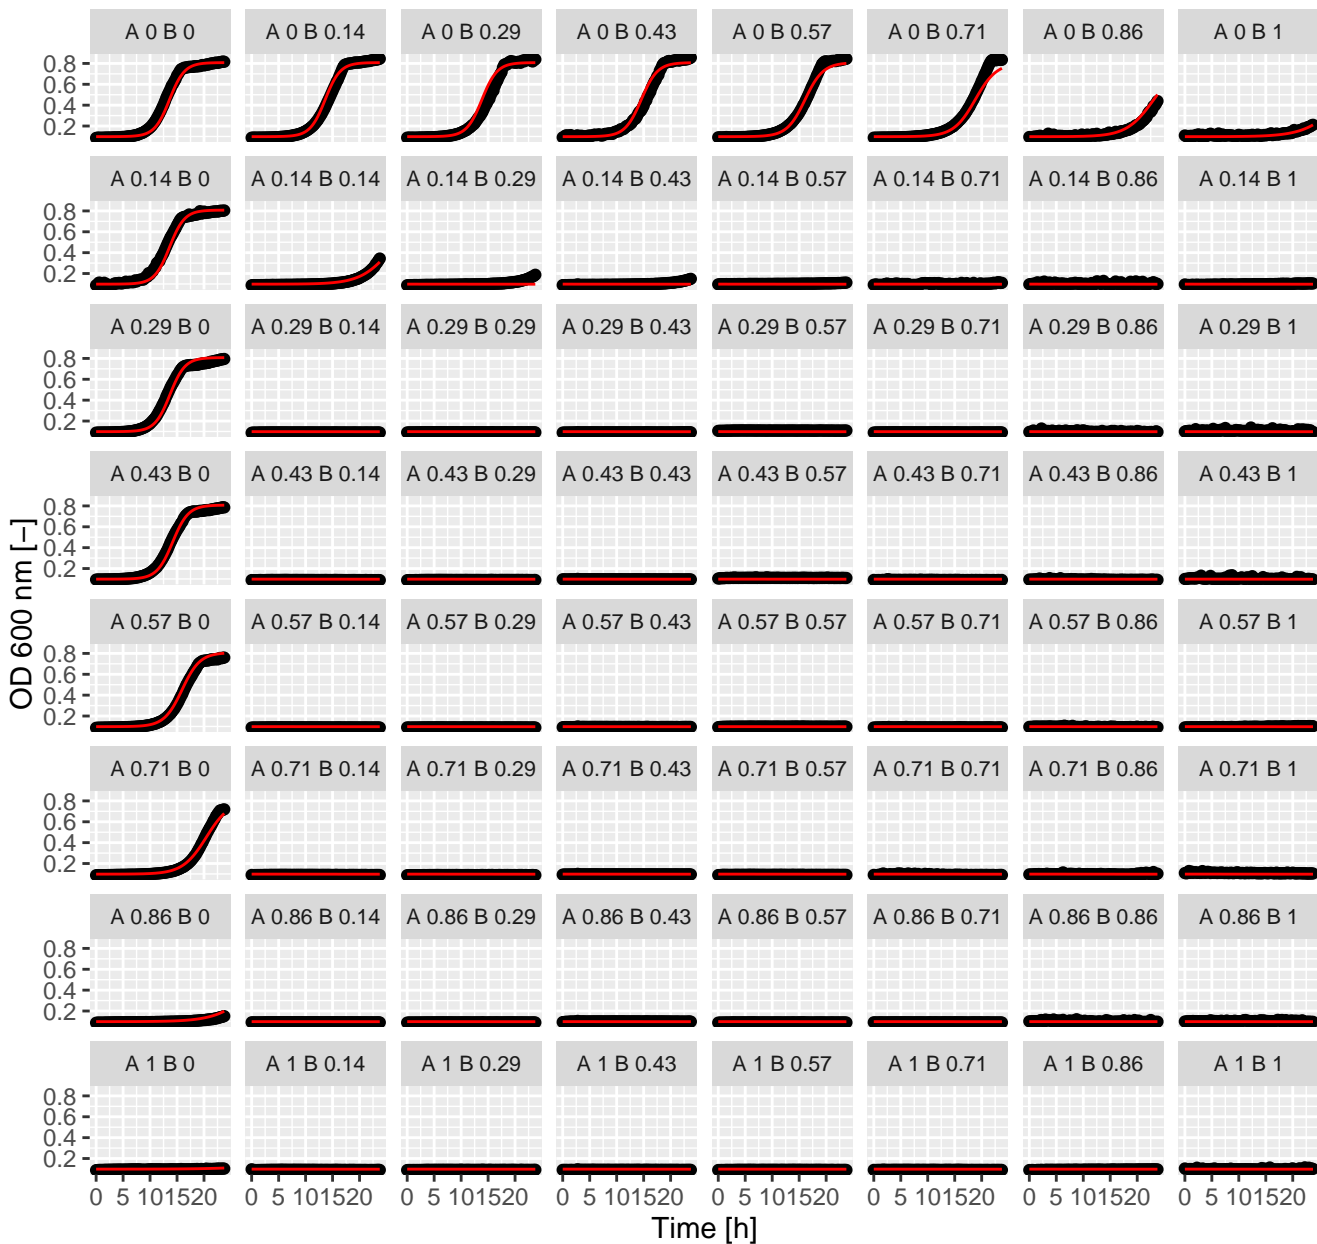

Sta.Tam (= Ax.Bx) Emp. Bliss  
beta = -10.74

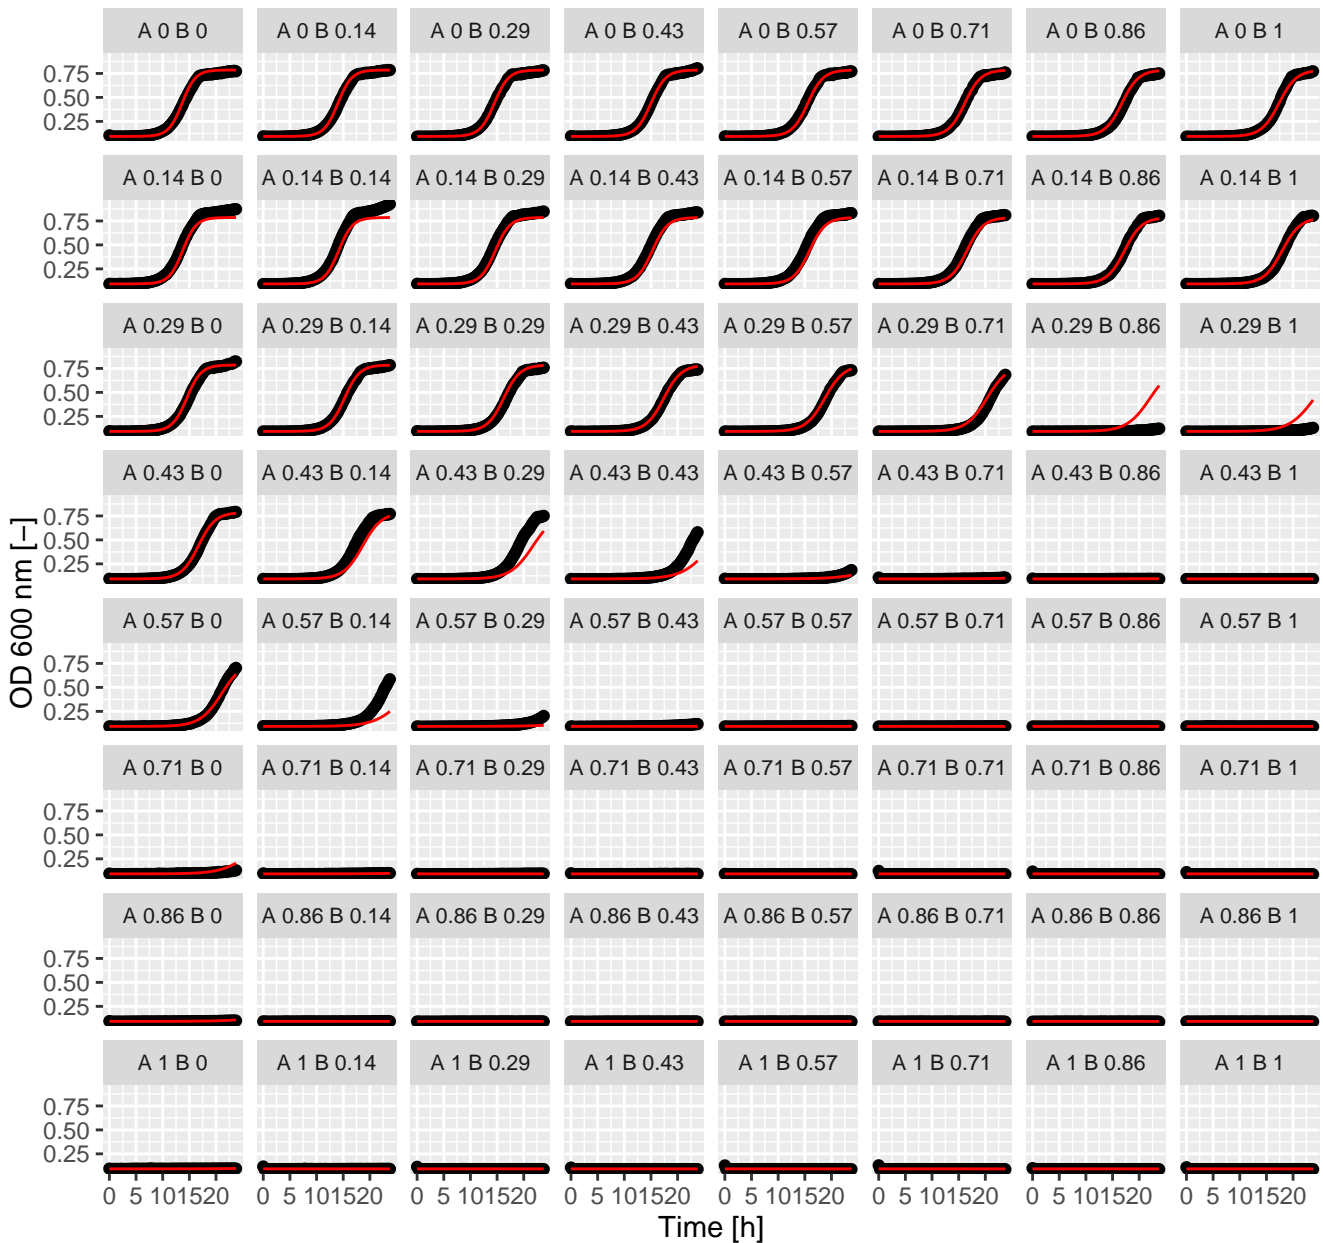

Sta.Ter (= Ax.Bx) Emp. Bliss  
beta = -104.6

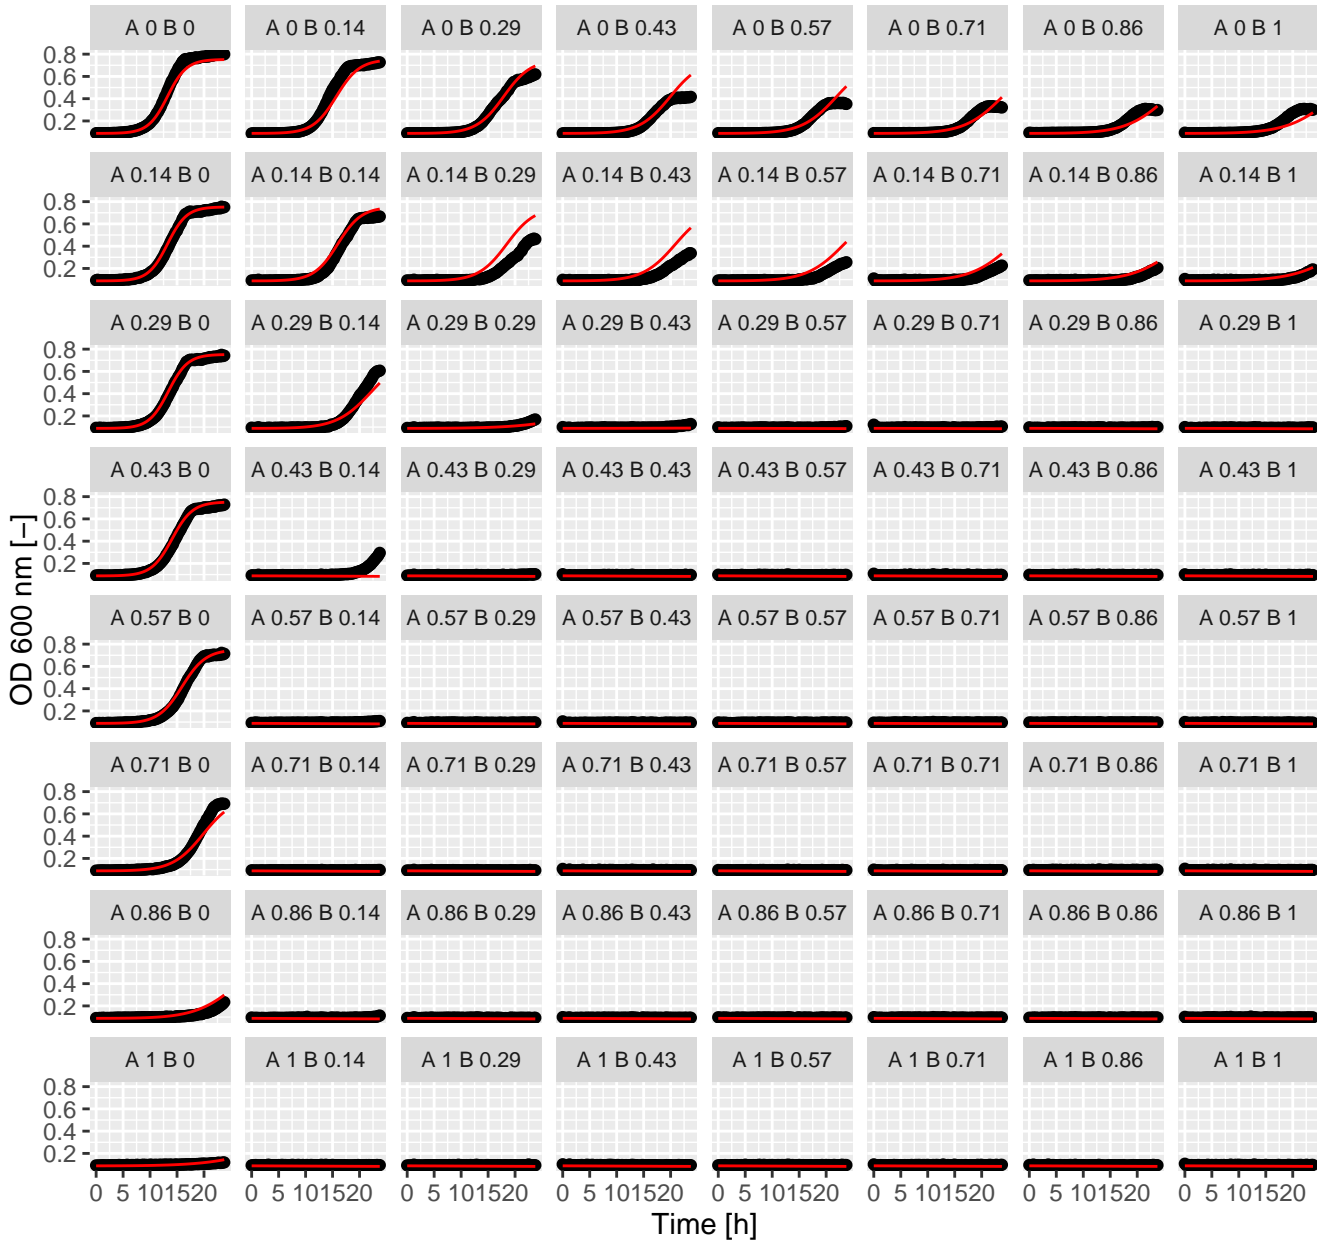

Sta.Tun (= Ax.Bx) Emp. Bliss  
beta = -8.46

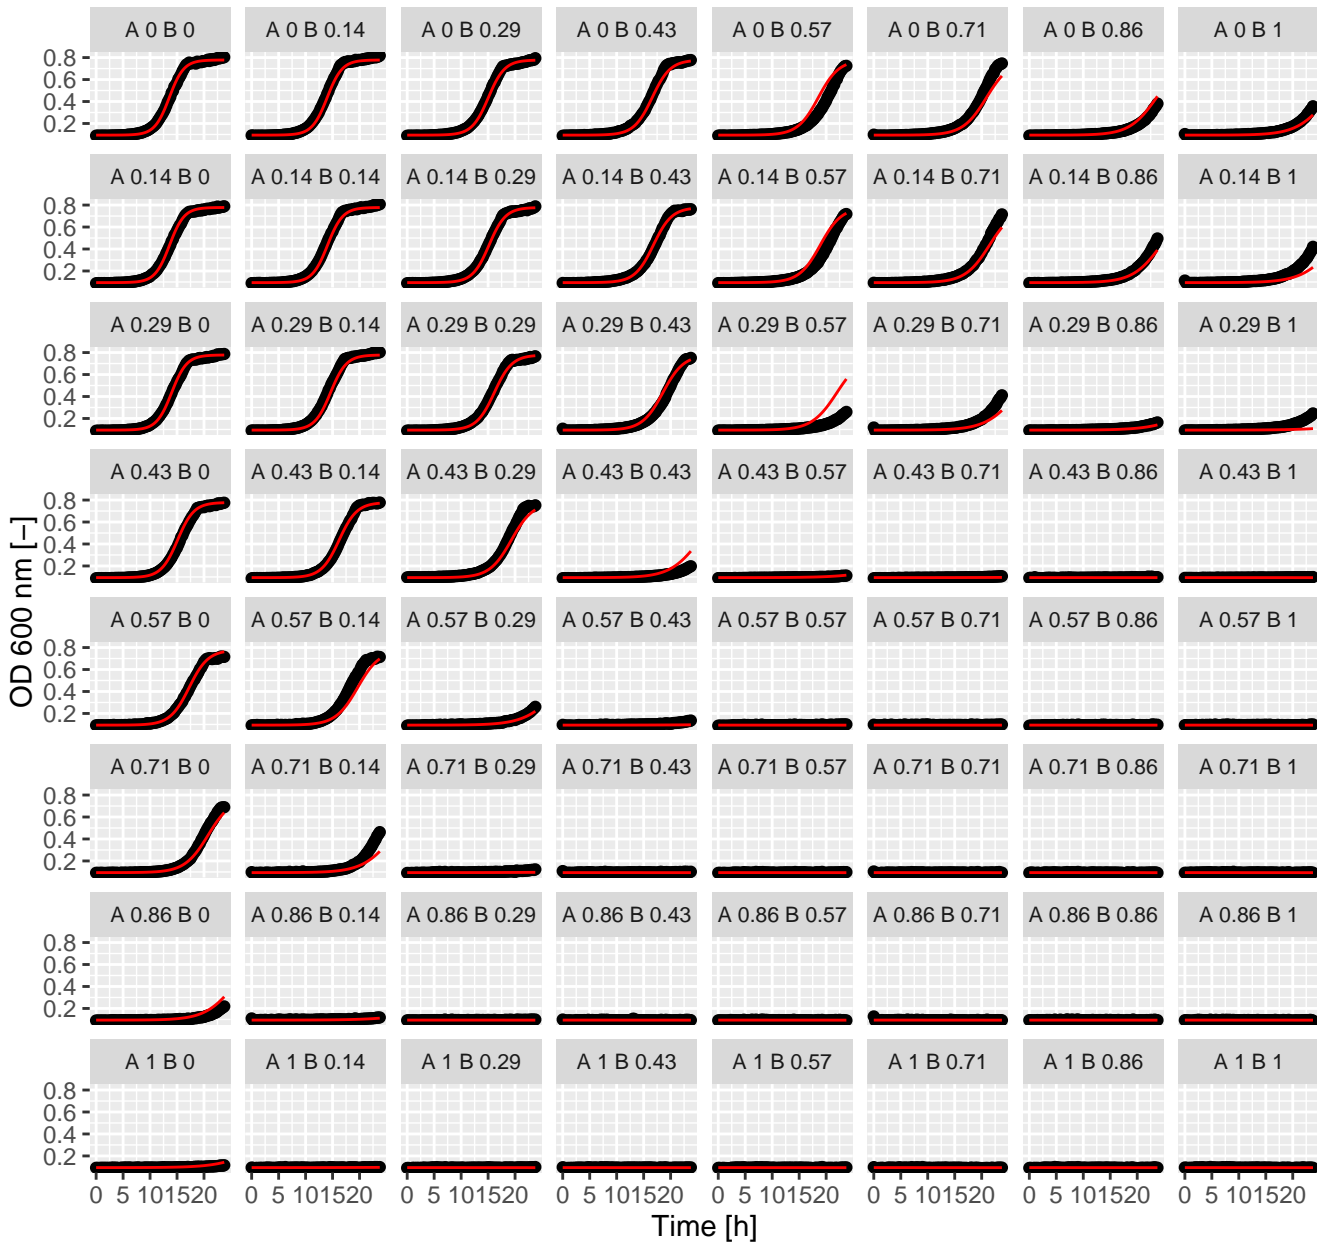

Sta.Wor (= Ax.Bx) Emp. Bliss  
beta = 1.59

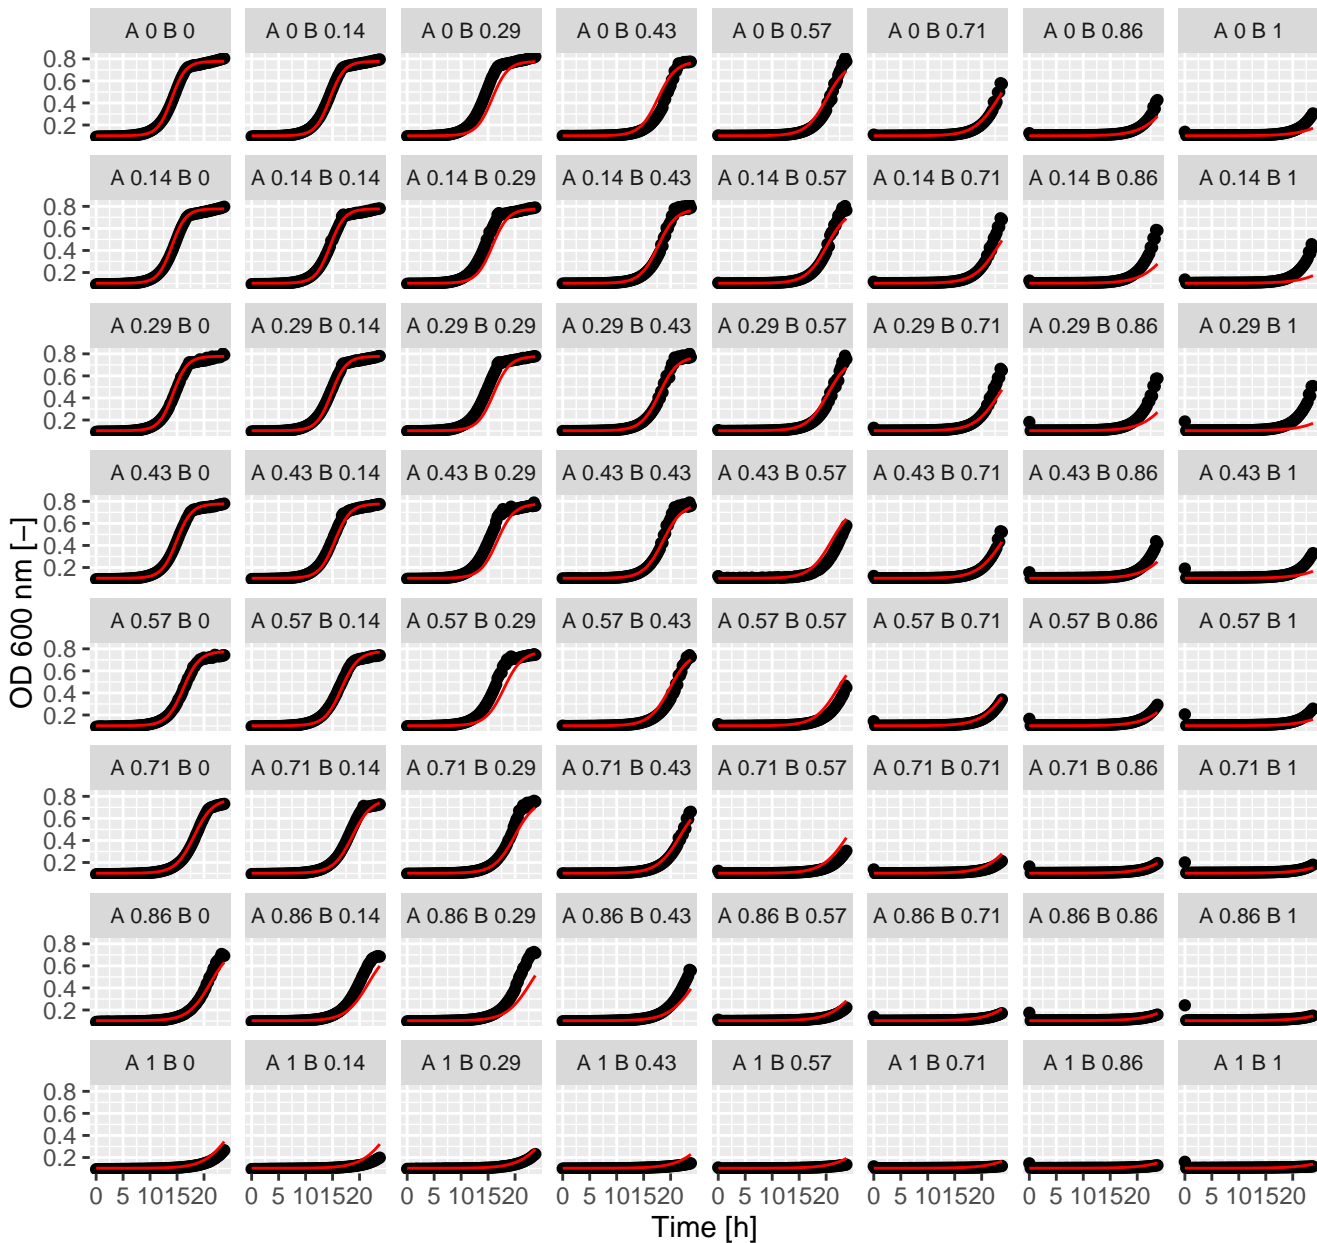

Tac.Tac (= Ax.Bx) Emp. Bliss  
beta = -376.8

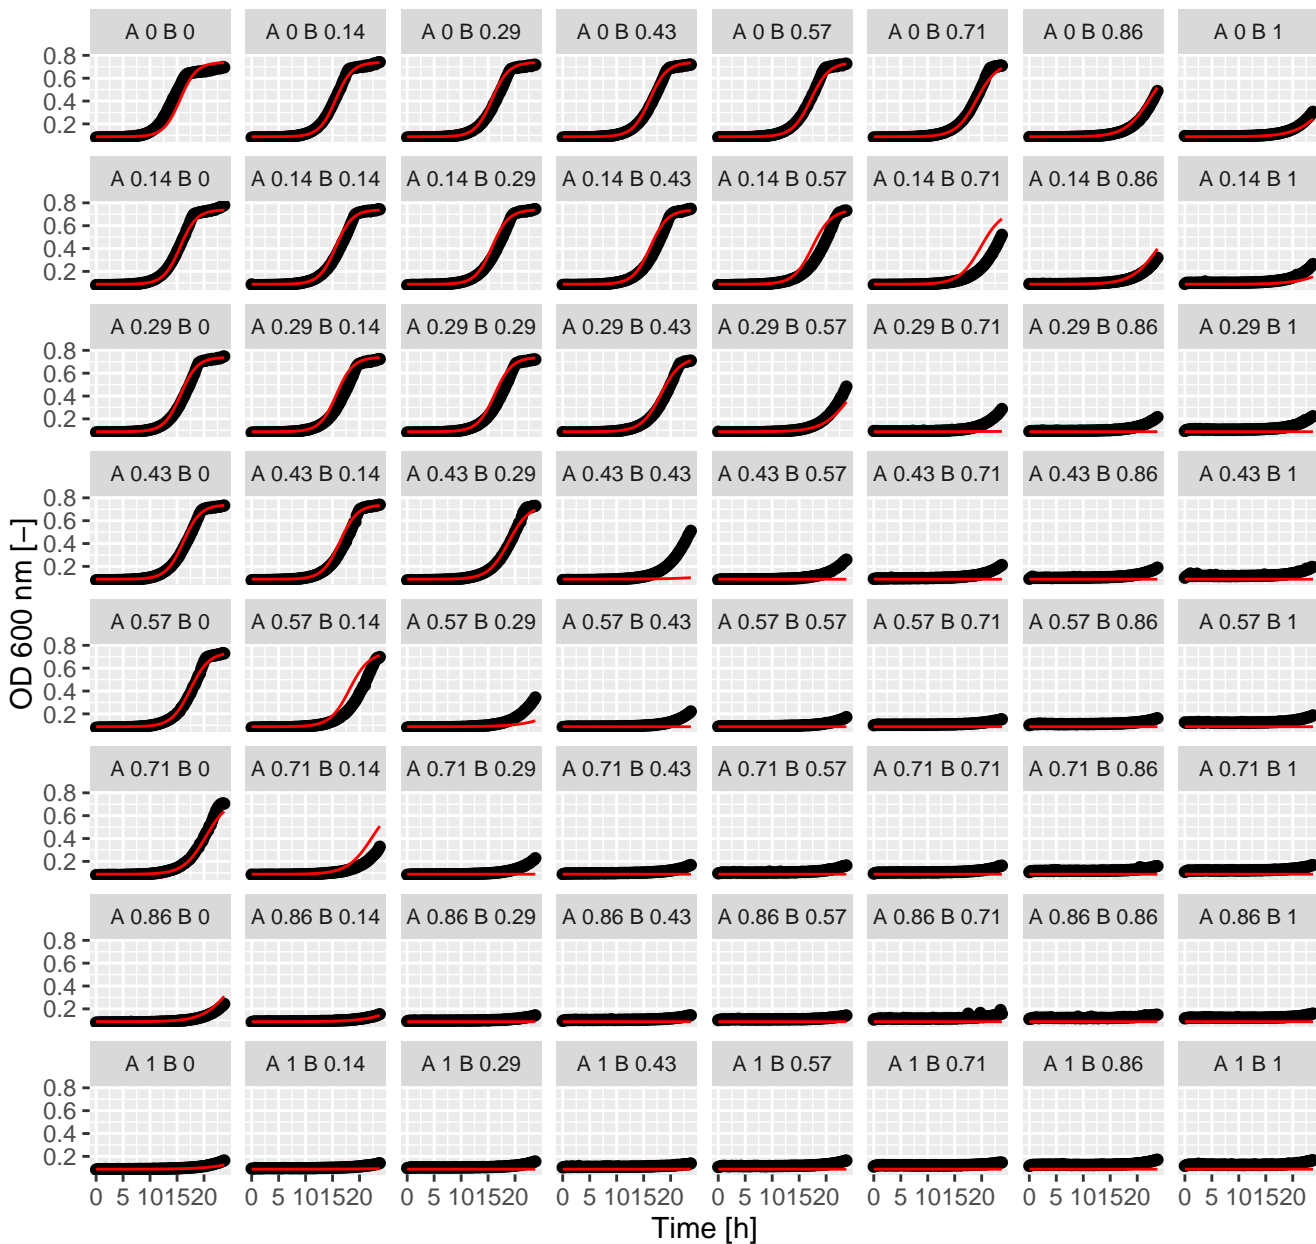



# Tac.Tam (= Ax.Bx) Emp. Bliss

beta = -164.65

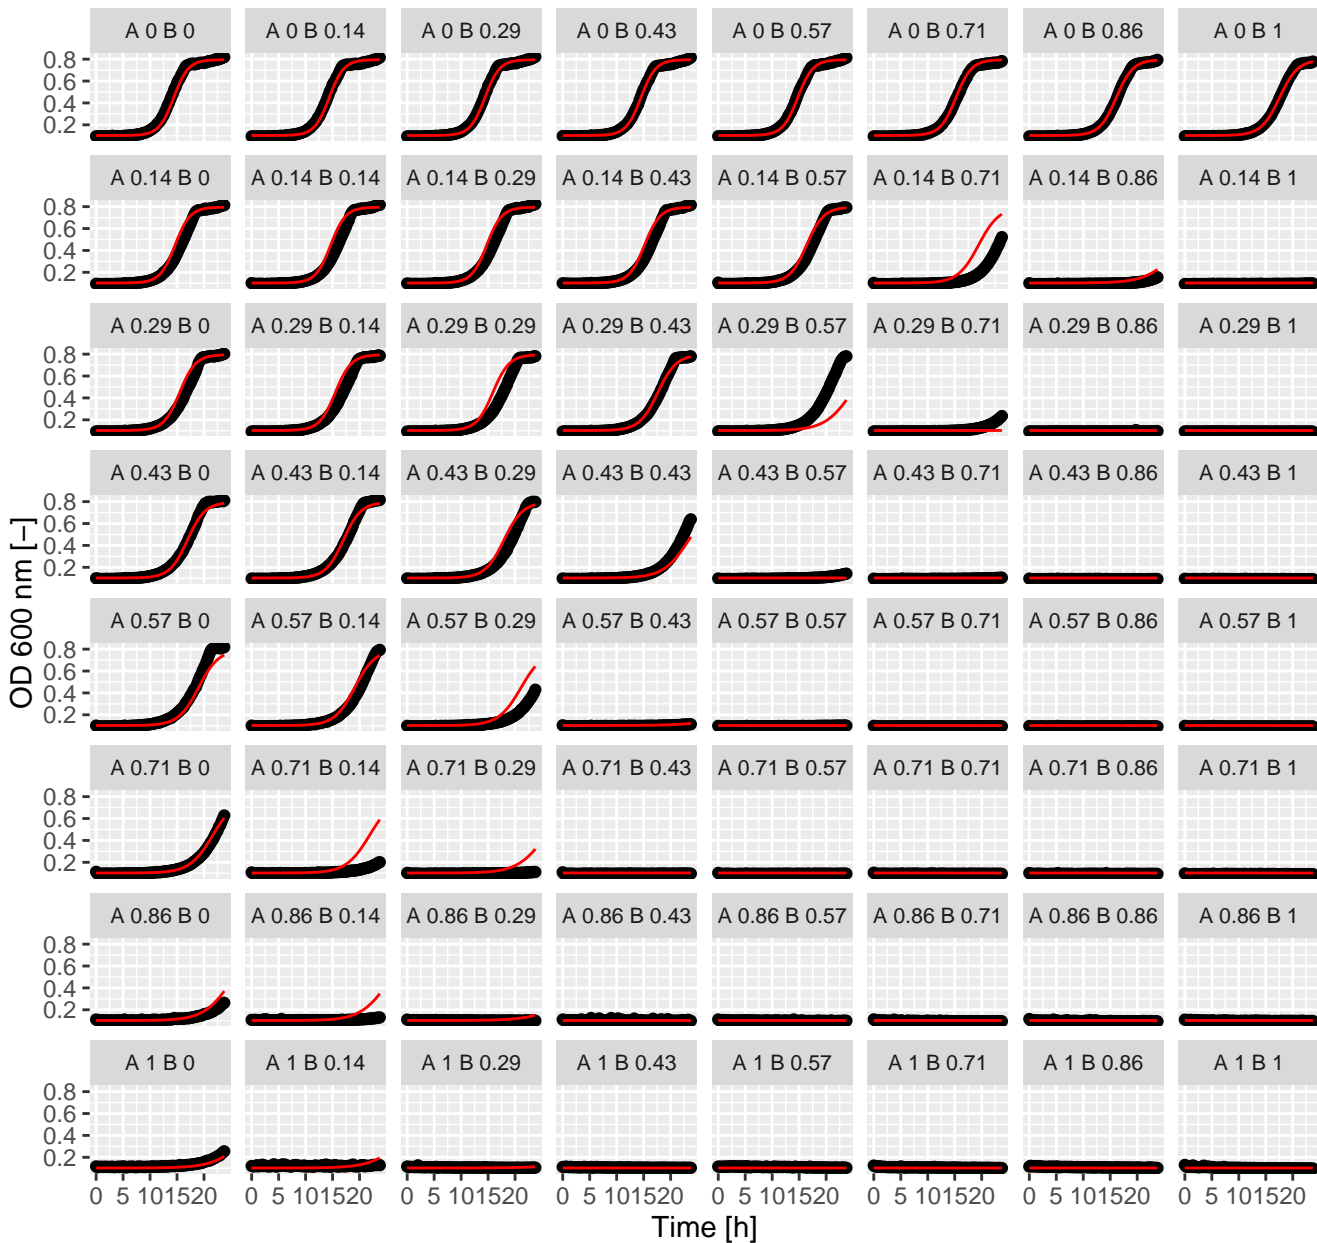

## Tac.Ter (= Ax.Bx) Emp. Bliss

beta = -1080.4

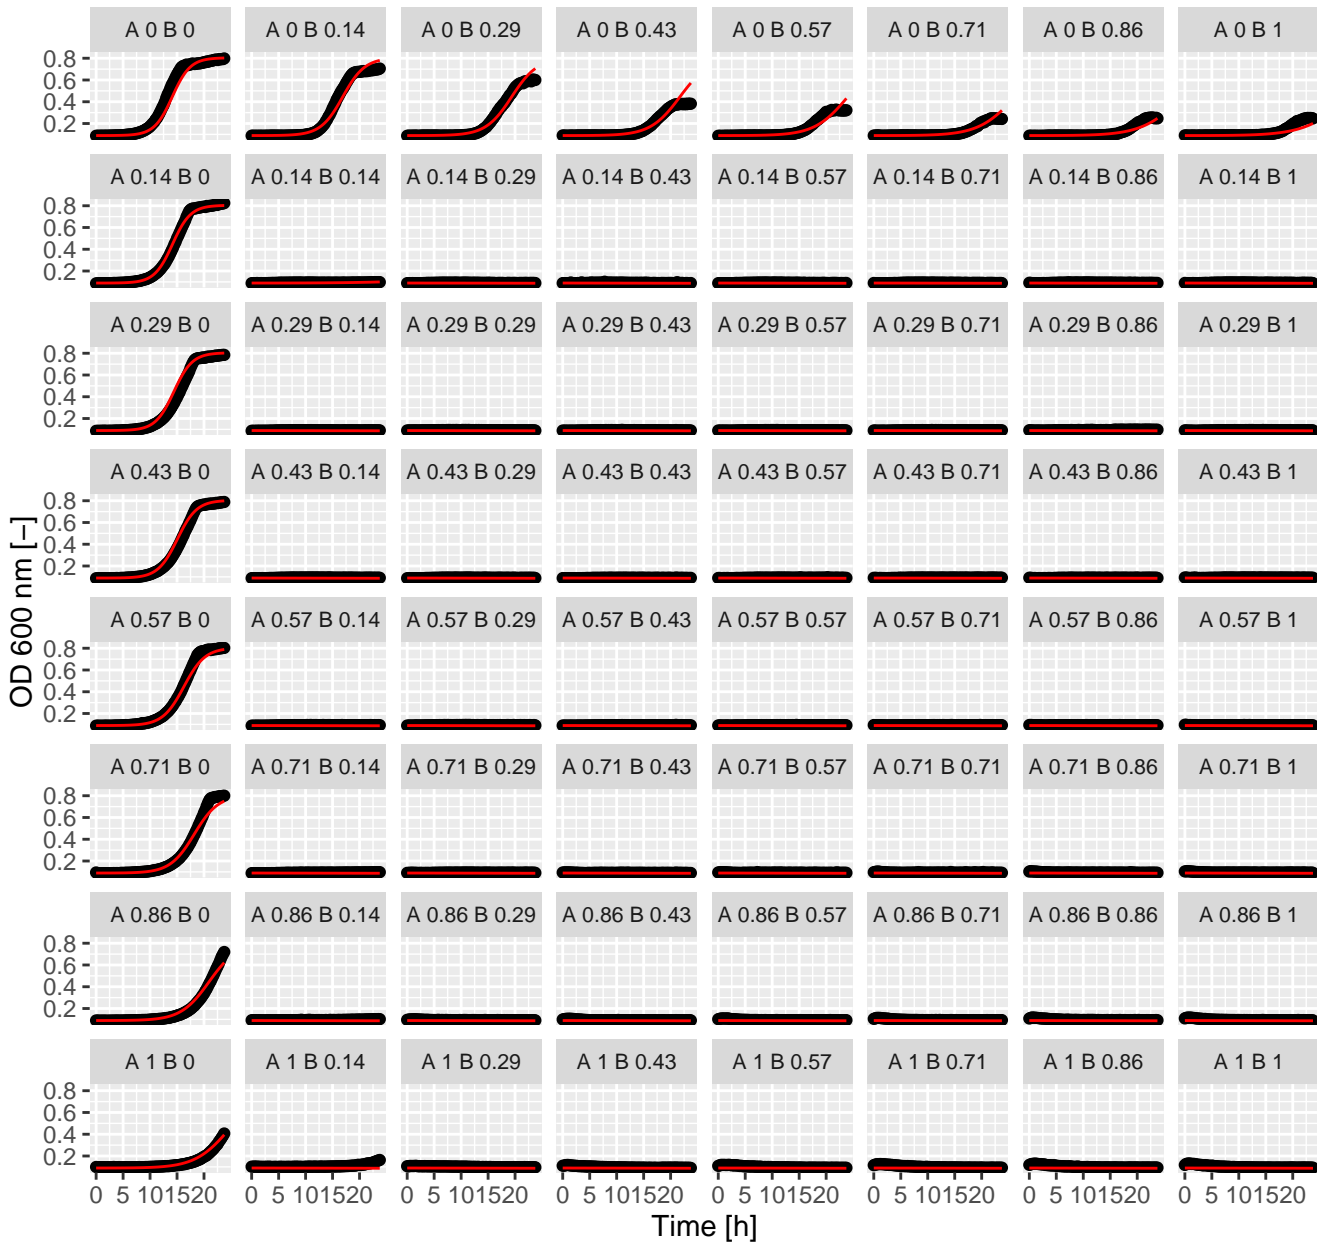

Tac.Tun (= Ax.Bx) Emp. Bliss  
 $\beta = -5.91$

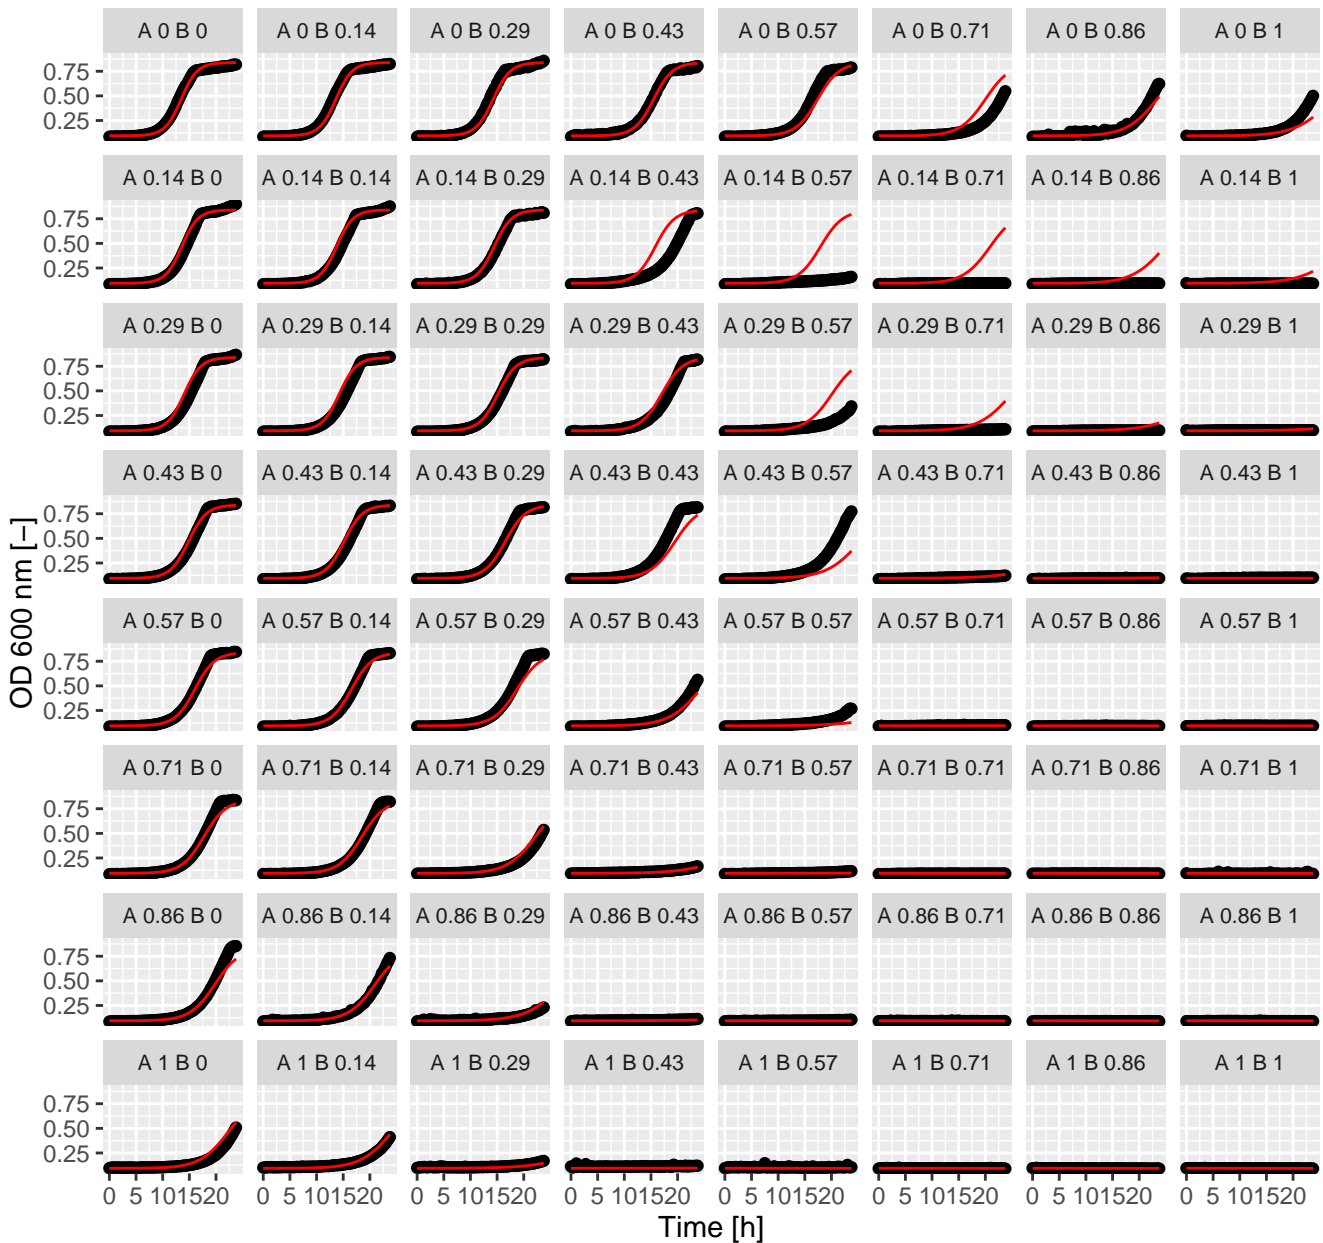

# Tam.Tam (= Ax.Bx) Emp. Bliss

beta = -119.38

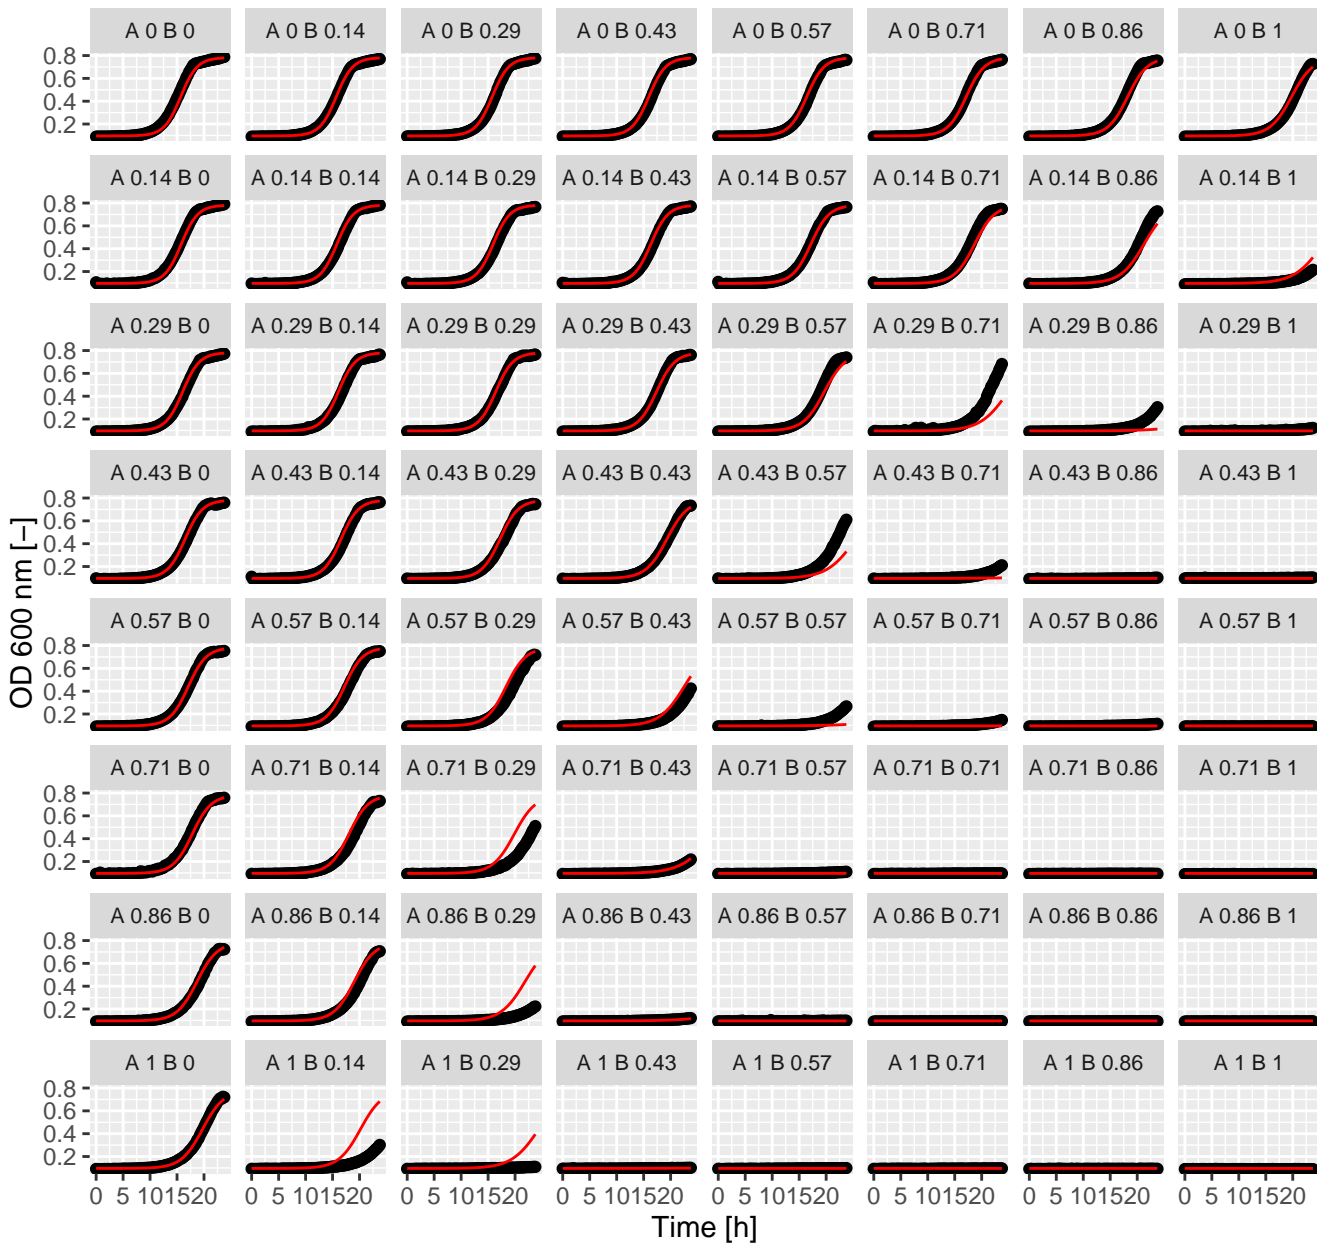

Tam.Ter (= Ax.Bx) Emp. Bliss  
beta = 1.14

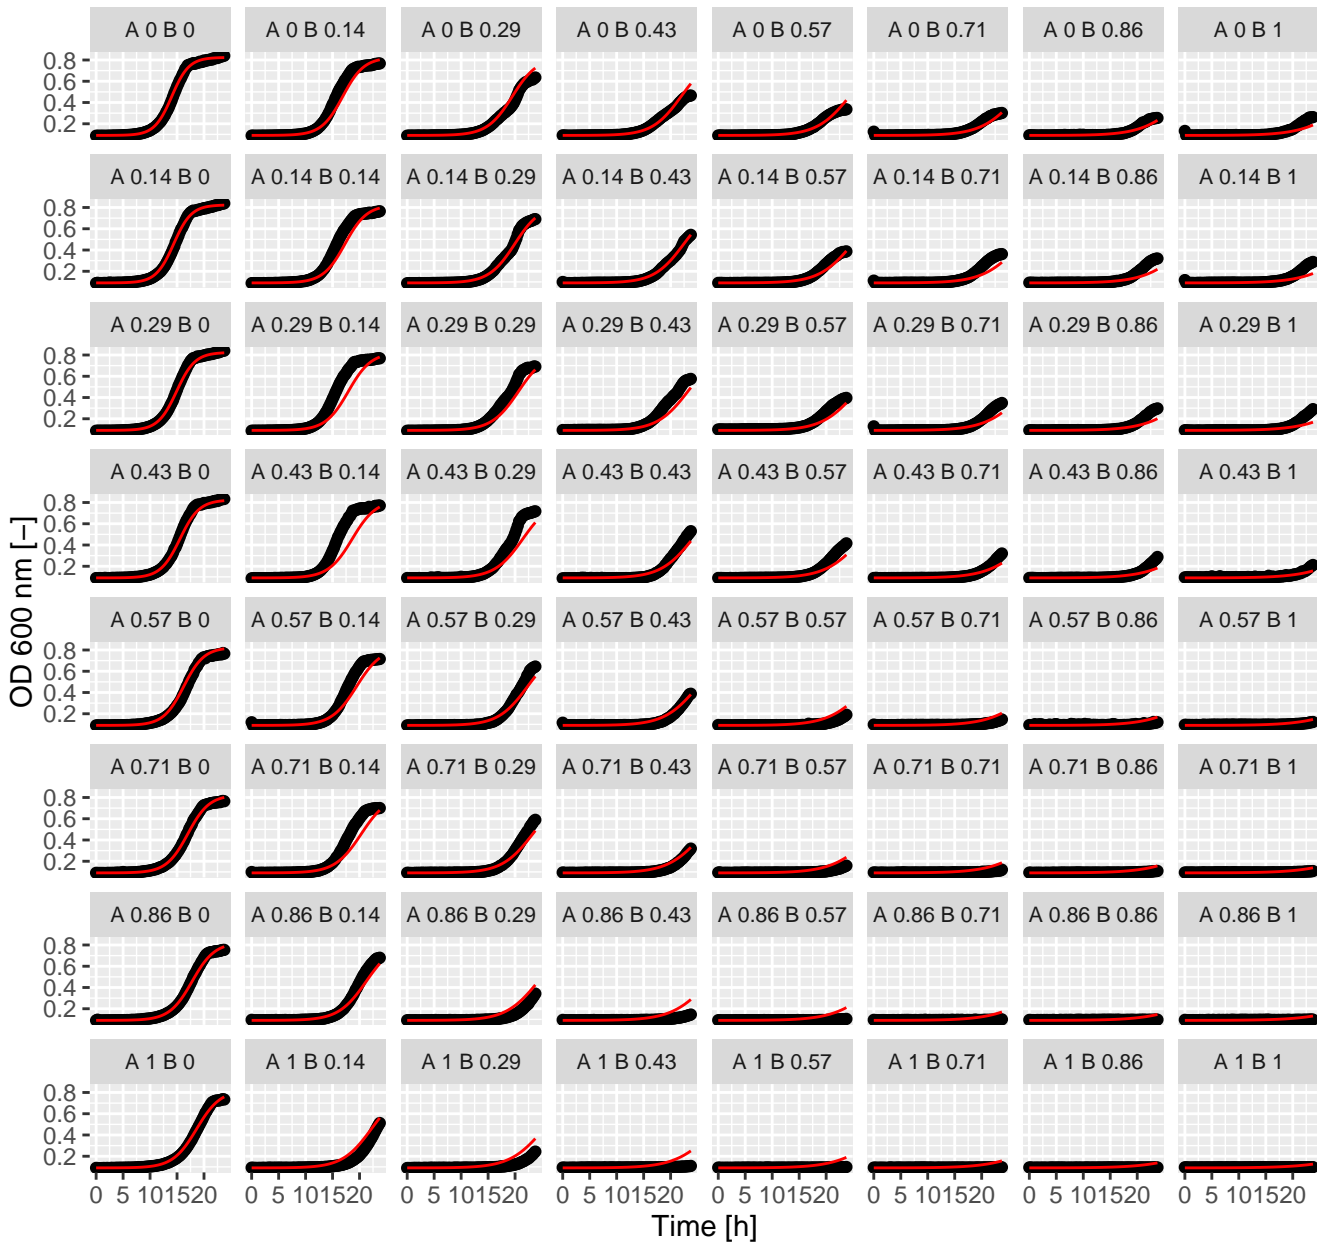

Ter.Ter (= Ax.Bx) Emp. Bliss  
beta = 1.49

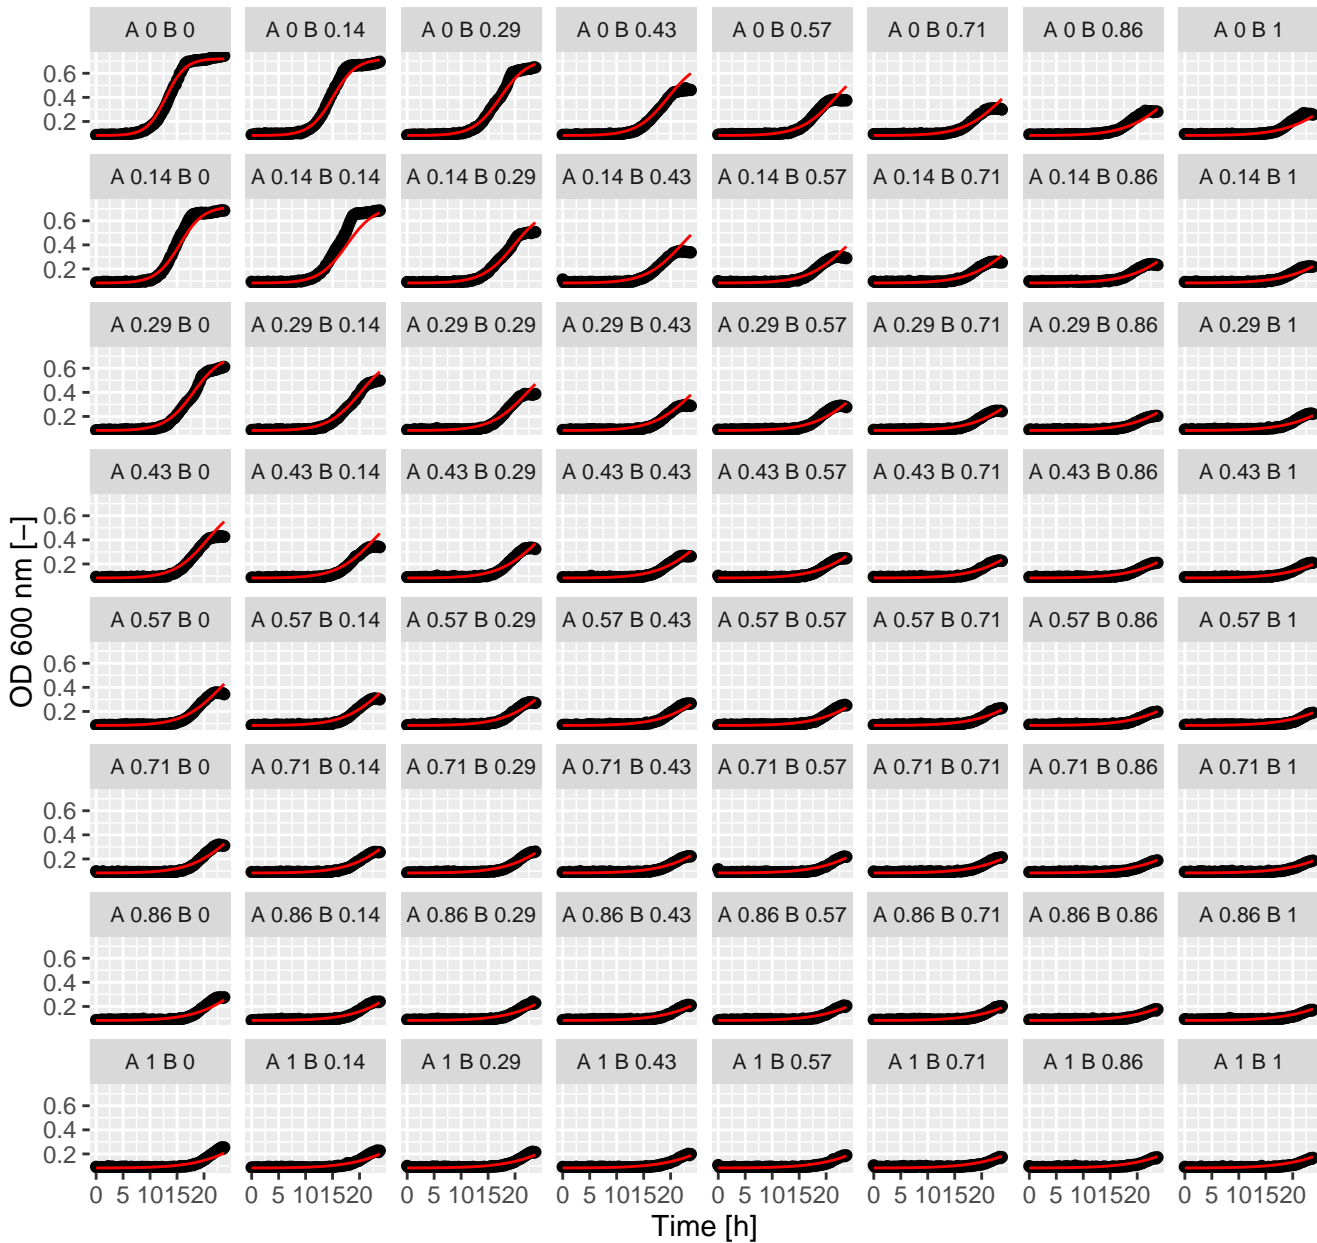

Ter.Tun (= Ax.Bx) Emp. Bliss  
beta = 1.26

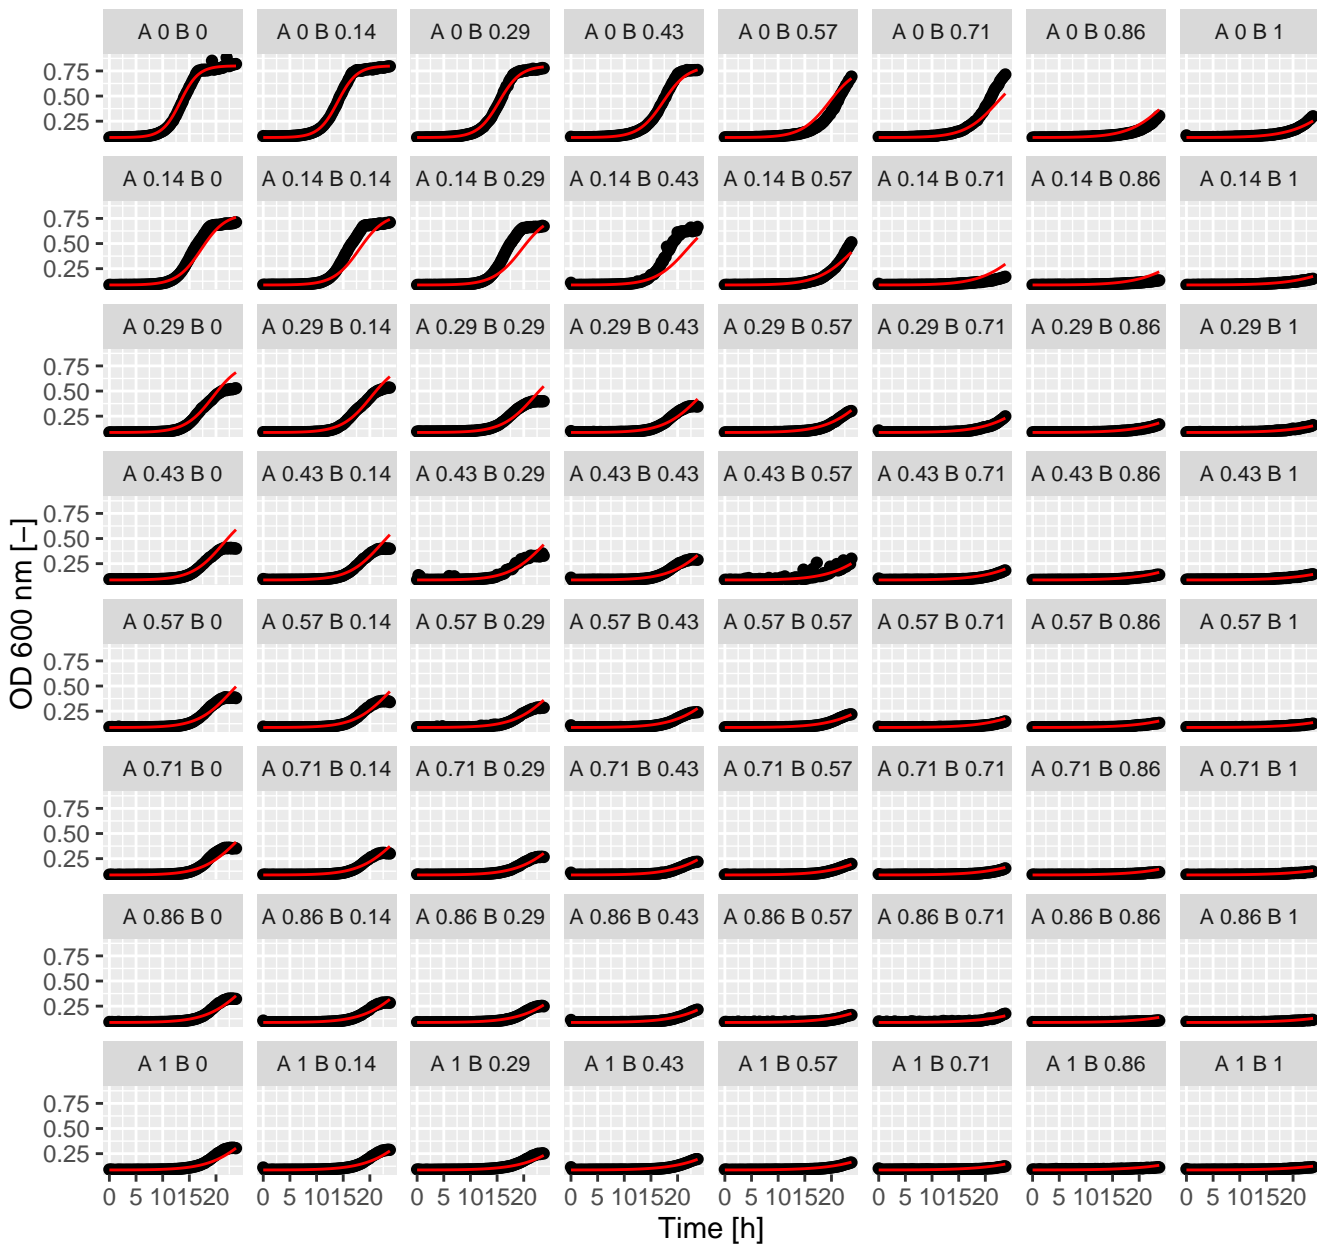

Tun.Tun (= Ax.Bx) Emp. Bliss  
beta = -31.79

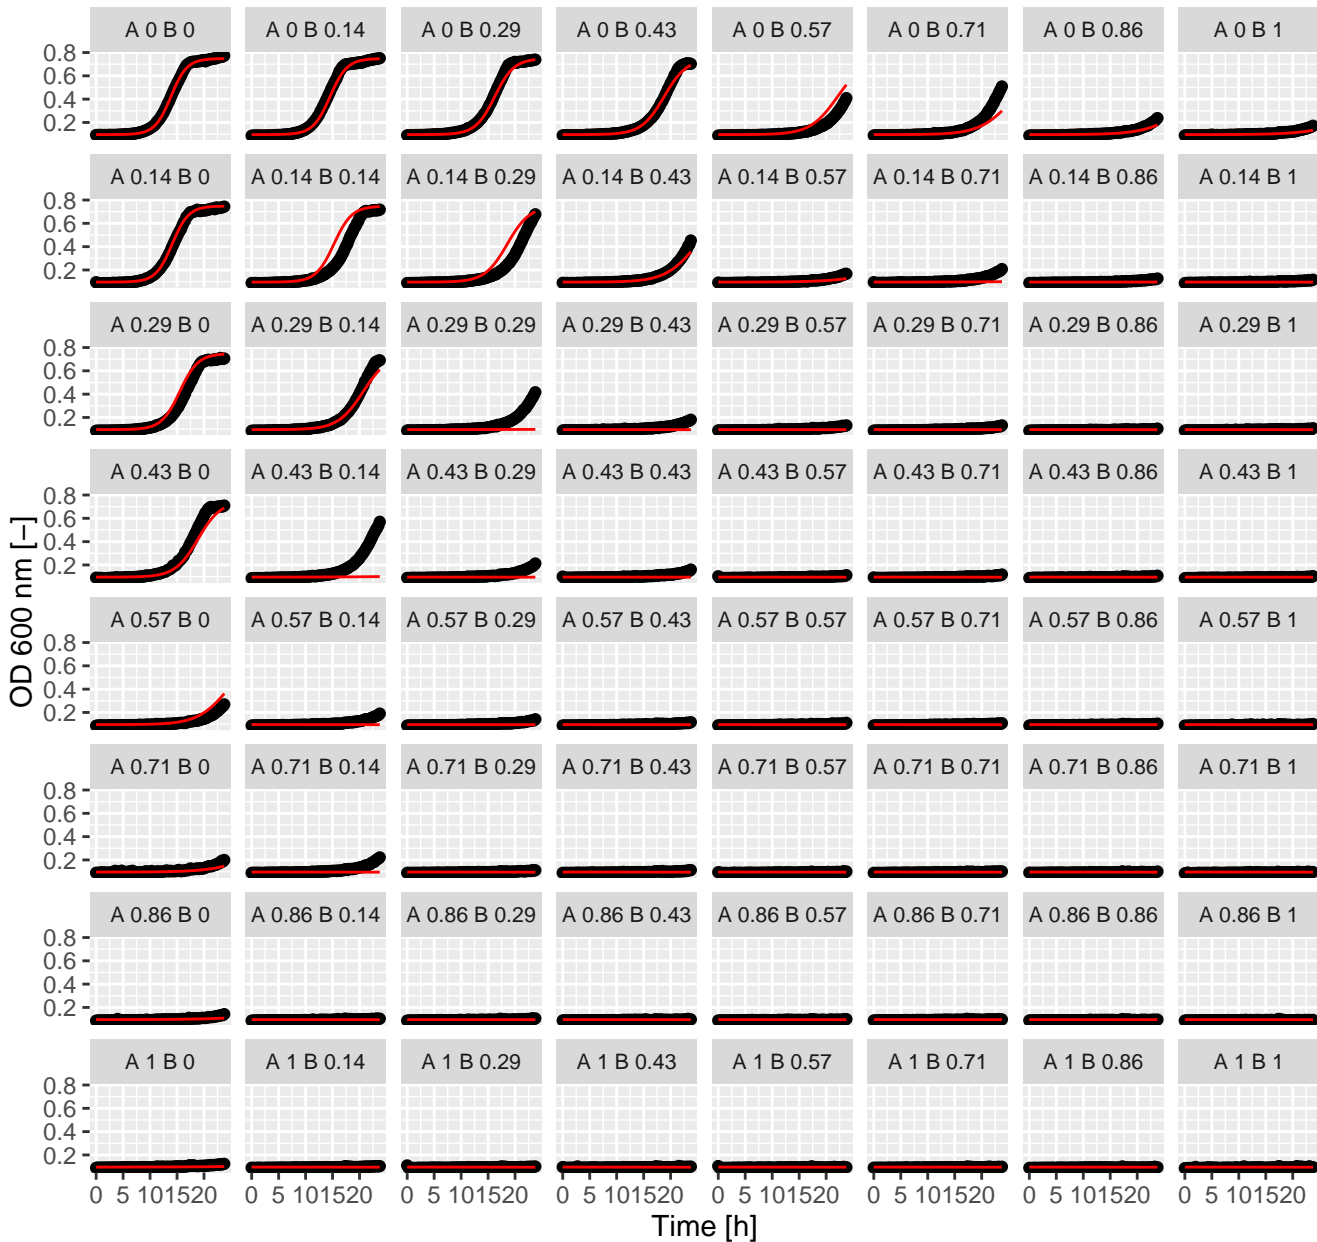

Supplement: 41467_2017_1929_MOESM4_ESM.pdf [file 41467_2017_1929_MOESM4_ESM.pdf]
