# Supplementary material for: A general pharmacodynamic interaction model identifies perpetrators and victims in drug interactions
Source: PubMed Central journal article supplement (PMC5730559; doi:10.1038/s41467-017-01929-y), 2017-12-14
Supplement: 41467_2017_1929_MOESM1_ESM.pdf [file 41467_2017_1929_MOESM1_ESM.pdf]

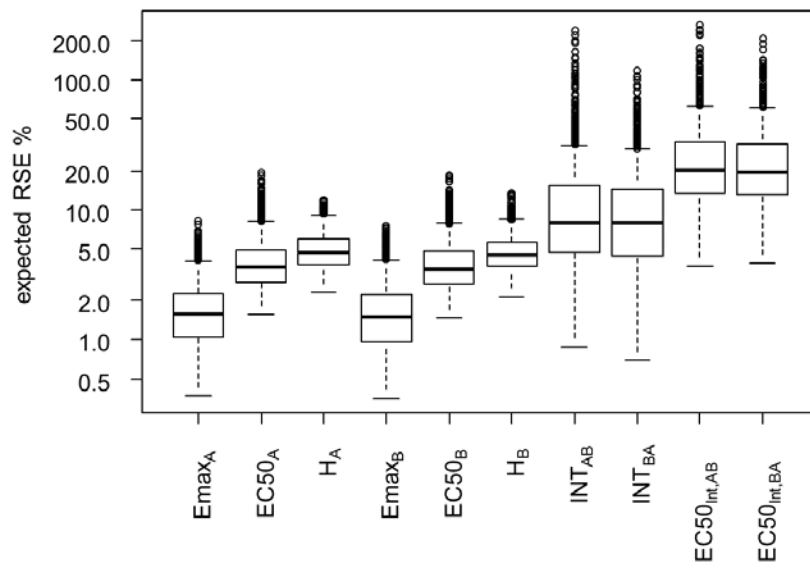

**Supplementary Figure 1:** Distribution of the expected relative standard errors (RSE) for the mono drug effects ( $E_{\max}$ , EC50, H) and the GPDI interaction parameters (INT, EC50<sub>INT</sub>) for the combined drug effects.

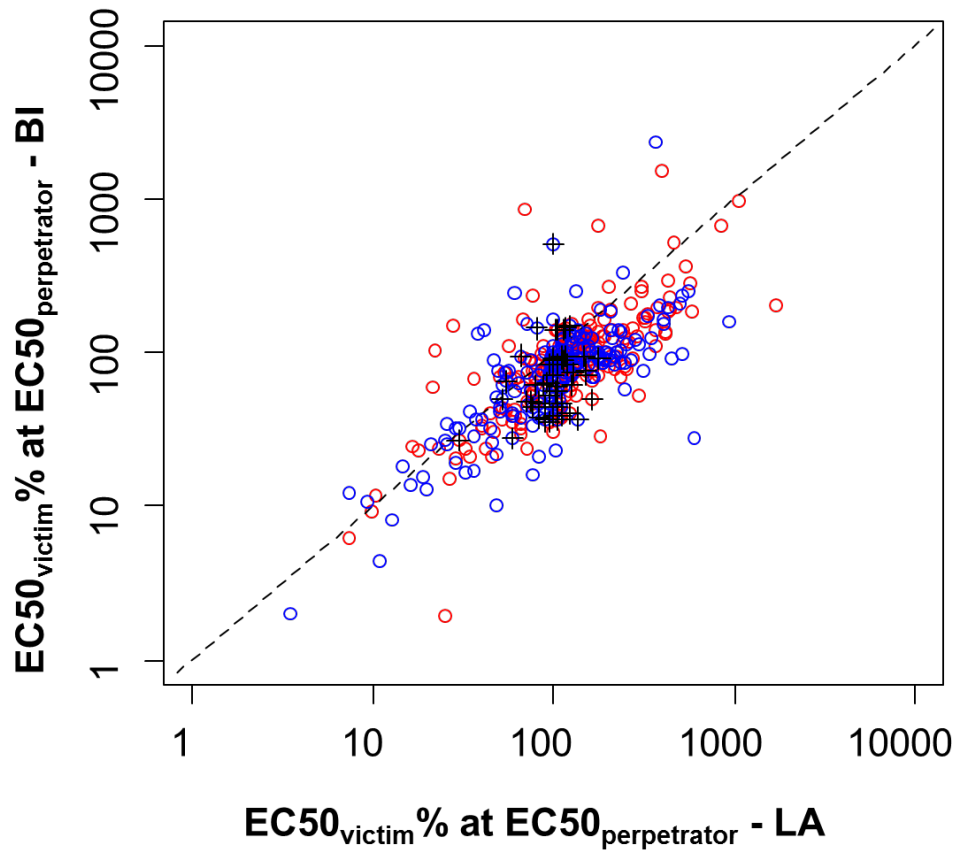

**Supplementary Figure 2:** Comparison of the estimated  $EC50_{victim}\%$  at  $EC50_{perpetrator}$  for Loewe Additivity (LA) and Bliss Independence (BI); estimated  $EC50B\%$  at  $EC50A$  (red), estimated  $EC50A\%$  at  $EC50B$  (blue) from the Cokol dataset; estimates from sham combinations (crossed).

a)

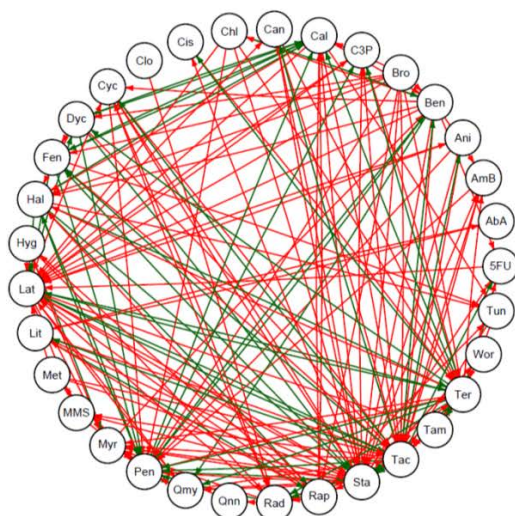

b)

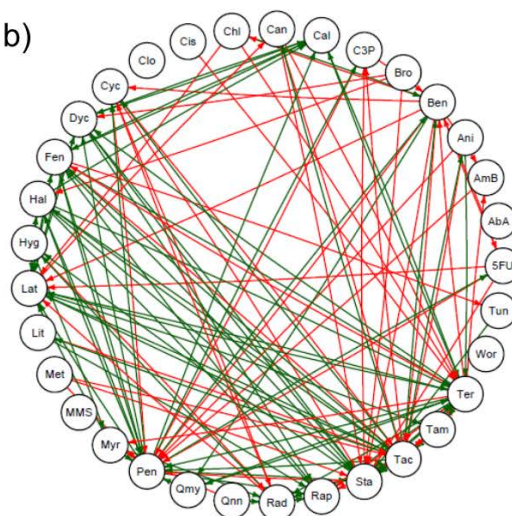

**Supplementary Figure 3:** Interaction network between the significant interactions from the unjoined Loewe Additivity (a) and Bliss Independence-based GPDI analyses (b). Note the overall higher synergy rate in case of Bliss Independence; arrows visualize direction of the PD interaction from the perpetrator drug to the victim drug, i.e. decrease of the victims EC50 resulting in antagonism (red) or increase of the victims EC50 resulting in synergism (green); note that interactions can be mono-directional or bi-directional of same polarity (joint antagonism or joint synergy) or opposite polarity leading to asymmetric bidirectional interactions; frequency of perpetrator and victim behaviour in the network is presented in b) to d). Abbreviations of the compounds: Aureobasidin A (AbA), Amphotericin B (AmB), Anisomycin (Ani), Benomyl (Ben), Bromopyruvate (Bro), CCCP (C3P), Calyculin A (Cal), Cantharidin (Can), Chlorzoxazone (Chl), Cisplatin (Cis), Clo (Clozapine), Cycloheximide (Cyc), Dyclonine (Dyc), Fenpropimorph (Fen), Haloperidol (Hal), Hygromycin (Hyg), Latrunculin B (Lat), Lithium (Lit), Methotrexate (Met), Methyl methanesulfonate (MMS), Myriocin (Myr), Pentamidine (Pen), Quinine (Qnn), Quinomycin (QMY), Radicol (Rad), Rapamycin (Rap), Staurosporine (Sta), Tacrolimus (Tac), Tamoxifen (Tam), Tunicamycin (Tun) and Wortmannin (Wor).

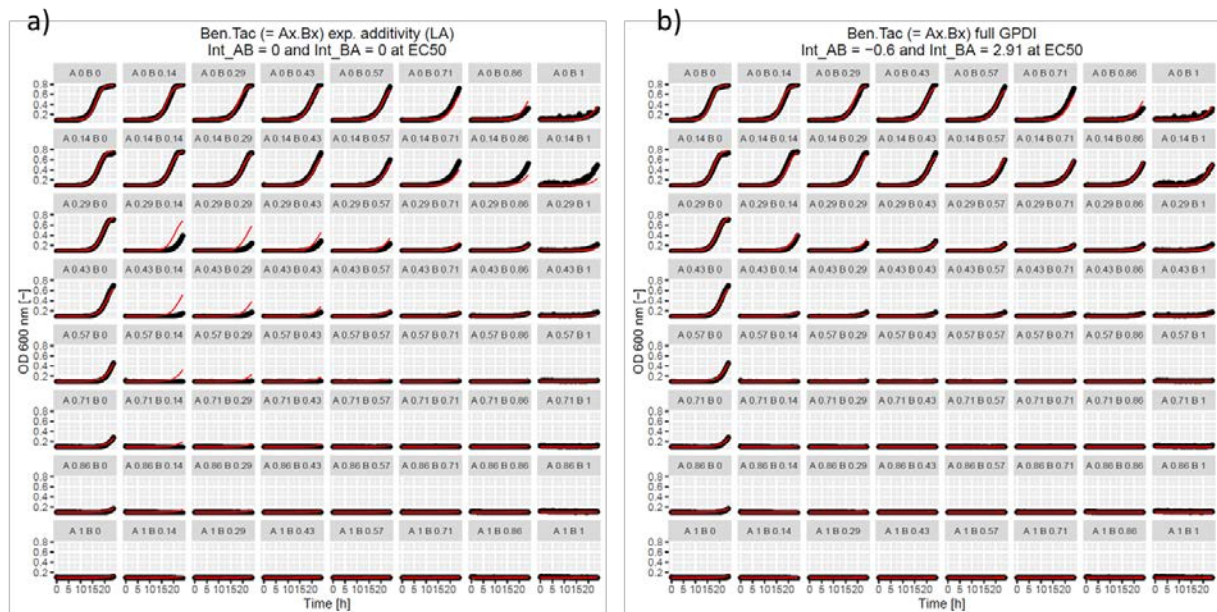

**Supplementary Figure 4:** Individual predictions (red) and observed time-courses (black) for the combination of Benomyl (Ben, drug A) and Tacrolimus (Tac, drug B) at concentrations  $Ax.Bx$  (relative minimal inhibitory concentration<sup>23</sup>); Predicted Loewe Additivity from the single drug effects with both INT parameters set to zero reveals areas of synergy (e.g. A0.29 B0.24, observed response higher than pure additive response) and areas of antagonism (e.g. A0.14 B1, observed response lower than pure additive response) (a); Predicted response using estimated GPD parameters indicates ‘spot-on’ fit of the data and quantified that Ben decreases the EC50 of Ben is decreased by Tac (INT<sub>AB</sub> of -0.6) and the EC50 of TAC is increased by Ben (INT<sub>BA</sub> of 2.91) capturing this asymmetric bidirectional interaction.

**Supplementary Table 1:** Parameter values of the Loewe-Additivity (LA)-based and Bliss-Independence (BI)-based GPDI models used for simulating the scenarios presented in Figure 1.

| Scenario / Parameterisation     | $E_{max_A}$ | $EC50_A$ | $H_A$ | $E_{max_B}$ | $EC50_B$ | $H_B$ | $Int_{AB}$ | $Int_{BA}$ | $EC50_{INT,AB}$ | $EC50_{INT,BA}$ | $H_{INT,AB}$ | $H_{INT,BA}$ |
|---------------------------------|-------------|----------|-------|-------------|----------|-------|------------|------------|-----------------|-----------------|--------------|--------------|
| LA                              | 1           | 50       | 4     | 1           | 50       | 4     | 0          | 0          | 25              | 25              | 1            | 1            |
| LA - bidirectional synergy      | 1           | 50       | 4     | 1           | 50       | 4     | -0.9       | -0.9       | 25              | 25              | 1            | 1            |
| LA - bidirectional antagonism   | 1           | 50       | 4     | 1           | 50       | 4     | 1          | 1          | 25              | 25              | 1            | 1            |
| LA - bidirectional antagonism   | 1           | 50       | 4     | 1           | 50       | 4     | -0.99      | 4          | 25              | 25              | 1            | 1            |
| LA - monodirectional synergy    | 1           | 50       | 4     | 1           | 50       | 4     | 0          | -0.9       | 25              | 25              | 1            | 1            |
| LA - monodirectional antagonism | 1           | 50       | 4     | 1           | 50       | 4     | 0          | 4          | 25              | 25              | 1            | 1            |
| BI                              | 1           | 50       | 4     | 1           | 50       | 4     | 0          | 0          | 25              | 25              | 1            | 1            |
| BI - bidirectional synergy      | 1           | 50       | 4     | 1           | 50       | 4     | -0.9       | -0.9       | 25              | 25              | 1            | 1            |
| BI - bidirectional antagonism   | 1           | 50       | 4     | 1           | 50       | 4     | 1          | 1          | 25              | 25              | 1            | 1            |
| BI - bidirectional antagonism   | 1           | 50       | 4     | 1           | 50       | 4     | -0.99      | 4          | 25              | 25              | 1            | 1            |
| BI - monodirectional synergy    | 1           | 50       | 4     | 1           | 50       | 4     | 0          | -0.9       | 25              | 25              | 1            | 1            |
| BI - monodirectional antagonism | 1           | 50       | 4     | 1           | 50       | 4     | 0          | 4          | 25              | 25              | 1            | 1            |
| BI - different Emax             | 0.5         | 50       | 4     | 1           | 50       | 4     | 0          | 0          | 25              | 25              | 4            | 4            |
| BI - buffering                  | 0.5         | 50       | 4     | 1           | 50       | 4     | 0          | -0.9999    | 50              | 50              | 4            | 4            |

---

|                              |       |    |   |       |    |   |      |         |    |    |   |   |
|------------------------------|-------|----|---|-------|----|---|------|---------|----|----|---|---|
| BI - allosteric inhibition   | 0     | 50 | 4 | 1     | 50 | 4 | 0    | -0.9999 | 50 | 50 | 4 | 4 |
| BI - allosteric potentiation | 0     | 0  | 4 | 0.5   | 50 | 4 | 0    | 1       | 50 | 50 | 4 | 4 |
| BI - coalism                 | 0.001 | 50 | 4 | 0.001 | 50 | 4 | 1000 | 1000    | 50 | 50 | 4 | 4 |

---

**Supplementary Table 2:** Comparison of directions in suppressive drug interactions analysed in Cokol 2014<sup>30</sup> with the directions derived from the GPDI model; > direction from drug A to B; < direction from drug B to A; derived by Cokol assuming the less potent drug antagonizes the more potent drug, or using the GPDI approach where INT<sub>AB</sub> indicated a fractional change of EC50 of A (victim) at EC50 of B (perpetrator) resulting in < and/or INT<sub>BA</sub> indicated a fractional change of EC50 of B (victim) at EC50 of B (perpetrator) resulting in >; significant interaction and resulting direction was concluded for the GPDI model if outside the additivity margin of -0.5 to 0.5.

| Drug A | Drug B | Direction Cokol 2014 | INT_AB | INT_BA | Direction GPDI | Comment                                              |
|--------|--------|----------------------|--------|--------|----------------|------------------------------------------------------|
| 5FU    | STA    | >                    | 1.24   | 0.27   | <              | different direction in Cokol 2014                    |
| AMB    | PEN    | >                    | -0.17  | 3.32   | >              |                                                      |
| ANI    | LAT    | >>                   | 0.74   | 0.76   | >>             |                                                      |
| BEN    | LAT    | >                    | -0.04  | 2.12   | >              |                                                      |
| BEN    | STA    | >                    | 0.09   | 0.92   | >              |                                                      |
| AMB    | BEN    | <                    | 2.32   | 0.36   | <              |                                                      |
| 5FU    | BEN    | <                    | 1.07   | -0.33  | <              |                                                      |
| BEN    | HAL    | >                    | 0.04   | 3.19   | >              |                                                      |
| BEN    | TUN    | >>                   | 0.25   | 0.5    | none           | directions correct, but within additivity margin     |
| BEN    | CYC    | >                    | -0.01  | 0.6    | >              |                                                      |
| ANI    | BEN    | <                    | 0.4    | 0.23   | none           | directions correct, but within additivity margin     |
| BEN    | TAC    | >                    | -0.6   | 2.91   | >< (Synergy!)  | asymmetric bidirectional with antagonism and synergy |
| BRO    | STA    | >                    | -0.02  | 15.92  | >              |                                                      |
| BRO    | TAC    | >                    | 0.06   | 3.12   | >              |                                                      |

|     |     |    |       |      |      |                                                     |
|-----|-----|----|-------|------|------|-----------------------------------------------------|
| BRO | RAP | >  | 0.43  | 1.58 | >    |                                                     |
| BRO | HAL | >  | 0.01  | 3.71 | >    |                                                     |
| CAL | TAC | >  | 0     | 0.64 | >    |                                                     |
| CAL | RAP | >  | 0.81  | 0.69 | >>   | two directions, only one in Cokol 2014              |
| CAN | STA | >> | 0.87  | 0.54 | >>   |                                                     |
| CHL | LAT | >  | 0.06  | 3.24 | >    |                                                     |
| CHL | STA | >  | 0.27  | 0.77 | >    |                                                     |
| CIS | STA | >  | 1.15  | 0.49 | <    | different direction in Cokol 2014                   |
| CYC | LAT | >  | 1.02  | 0.46 | <    | different direction in Cokol 2014                   |
| CYC | STA | >  | 0.55  | 0.76 | >>   | different direction in Cokol 2014                   |
| DYC | TUN | >  | 0.1   | 0.39 | none | one direction correct, but within additivity margin |
| DYC | FEN | >  | -0.03 | 1.86 | >    |                                                     |
| FEN | TUN | >  | -0.04 | 3.43 | >    |                                                     |
| HAL | TUN | >  | 0.08  | 1.49 | >    |                                                     |
| LAT | QMY | >  | 0.94  | 0.91 | >>   | two directions, only one in Cokol 2014              |
| CIS | LAT | <  | 0.37  | 0.21 | none | directions correct, but within additivity margin    |
| CAN | LAT | >  | 3.97  | -0.4 | >    |                                                     |
| MET | STA | >  | 0.46  | 4.34 | >    |                                                     |
| MET | TAC | >  | 0.04  | 2.27 | >    |                                                     |
| MET | PEN | >> | 0.51  | 2.08 | >>   |                                                     |
| MYR | STA | >> | 1.14  | 1.14 | >>   |                                                     |
| MYR | QNN | >> | 3.11  | 0.18 | <    | one direction only, two in Cokol 2014               |
| QMY | STA | >  | 0.77  | 0.87 | >>   | two directions, only one in Cokol 2014              |



|     |     |    |      |       |      |                                                               |
|-----|-----|----|------|-------|------|---------------------------------------------------------------|
| LAT | RAD | <  | 3.06 | 0.13  | <    |                                                               |
| RAD | STA | >  | 1.38 | 0.38  | <    | different direction in Cokol 2014                             |
| CYC | RAD | <  | 0.8  | 2.07  | >>   | two directions, only one in Cokol 2014                        |
| STA | WOR | >  | 0.36 | 0.7   | >    |                                                               |
| C3P | TAC | <  | 1.43 | 0.12  | <    |                                                               |
| RAP | TAC | <  | 2.85 | 0.37  | <    |                                                               |
| AMB | TAC | >> | 1.3  | 0.88  | >>   |                                                               |
| QMY | TAC | <  | 0.32 | 0.53  | <    |                                                               |
| LAT | TAM | <  | 0.62 | -0.41 | <    |                                                               |
| FEN | TER | <  | 0.32 | -0.49 | none | Within additivity margin, but rather asymmetric bidirectional |
| MYR | TER | <  | 4.5  | 0.16  | <    |                                                               |
| CHL | TER | >> | 0.11 | 7.47  | >    | two directions, only one in Cokol 2014                        |
| AMB | TER | <  | 3.32 | 0.3   | <    |                                                               |

**Supplementary Table 3:** Combinations of terbinafin (Ter) with other drugs with targets outside the ergosterol pathway (Abbreviations see Figure 5);  $INT_{AB}$  represents the fractional change of the EC50 of drug A caused by drug B, i.e. quantifying the effect of drug B on A;  $INT_{BA}$  represents the fractional change of the EC50 of drug B caused by drug A, i.e. quantifying the effect of drug A on B.

| <b>Drug A</b> | <b>Drug B</b> | <b>Int<sub>AB</sub></b> | <b>INT<sub>BA</sub></b> | <b>Effect of A on B</b> | <b>Effect of B on A</b> |
|---------------|---------------|-------------------------|-------------------------|-------------------------|-------------------------|
| Sta           | Ter           | -0.7                    | -0.02                   | -                       | SYN                     |
| Tac           | Ter           | 2.69 <sup>§</sup>       | -0.93                   | SYN                     | ANT                     |
| Rap           | Ter           | -0.39                   | 0.83                    | ANT                     | -                       |
| Rad           | Ter           | -0.75                   | -0.15                   | -                       | SYN                     |
| Qmy           | Ter           | -0.93                   | -0.35                   | -                       | SYN                     |
| Pen           | Ter           | -0.74                   | 1.75                    | ANT                     | SYN                     |
| Myr           | Ter           | 4.5                     | 0.16                    | -                       | ANT                     |
| MMS           | Ter           | 0.08                    | 0.45                    | -                       | -                       |
| Met           | Ter           | 0.28                    | 0.49                    | -                       | -                       |
| Lat           | Ter           | -0.79                   | -0.54                   | SYN                     | SYN                     |
| Tun           | Ter           | -0.44                   | 1.94                    | ANT                     | -                       |

**Supplementary Table 4:** Combinations of bromopyruvate (Bro) with other drugs of the Cokol dataset (Abbreviations see Figure 5);  $INT_{AB}$  represents the fractional change of the EC50 of drug A caused by drug B, i.e. quantifying the effect of drug B on A;  $INT_{BA}$  represents the fractional change of the EC50 of drug B caused by drug A, i.e. quantifying the effect of drug A on B.

| <b>Drug A</b> | <b>Drug B</b> | <b>Int<sub>AB</sub></b> | <b>INT<sub>BA</sub></b> | <b>Effect of A on B</b> | <b>Effect of B on A</b> |
|---------------|---------------|-------------------------|-------------------------|-------------------------|-------------------------|
| Bro           | Ben           | 0.27                    | 0.69                    | ANT                     | -                       |
| Bro           | Cal           | 0.32                    | 1.38                    | ANT                     | -                       |
| Bro           | Dyc           | -0.04                   | 2.18                    | ANT                     | -                       |
| Bro           | Fen           | 0.17                    | 1.15                    | ANT                     | -                       |
| Bro           | Hal           | -0.01                   | 3.71                    | ANT                     | -                       |
| Bro           | Lat           | 0.24                    | 1.22                    | ANT                     | -                       |
| Bro           | Pen           | 0.19                    | 1.18                    | ANT                     | -                       |
| Bro           | Rap           | 0.43                    | 1.58                    | ANT                     | -                       |
| Bro           | Sta           | -0.02                   | 15.92                   | ANT                     | -                       |
| Bro           | Tac           | 0.06                    | 3.12                    | ANT                     | -                       |
| Bro           | Ter           | -0.11                   | 1.56                    | ANT                     | -                       |
| Bro           | Tun           | 0.15                    | 0.32                    | -                       | -                       |
